# Supplementary material for: Integration of genomics and transcriptomics predicts diabetic retinopathy susceptibility genes
Source: eLife journal article supplement (doi:10.7554/elife.59980), 2020-11-09
Supplement: code3 [file elife-59980-code3-v2.zip]

```
a=read.csv("/Users/ams/Downloads/All_treatment_effect_2017-06-13.csv", header=T)
hist(a$P.Value)
```
