# Supplementary material for: Integration of genomics and transcriptomics predicts diabetic retinopathy susceptibility genes
Source: eLife journal article supplement (doi:10.7554/elife.59980), 2020-11-09
Supplement: code8 [file elife-59980-code8-v2.zip]

```

library("ggplot2")
library(lattice)
library(ggsignif)

## THIS DATA WAS CREATED IN THE FILE GWAS_EQTL_ENRICHMENT.R ##
GWAS <- read.table(file = "GWAS_eQTL_ind.txt", as.is=T, header=T)
#get rid of mendelian columns
g=GWAS[, -grep(".mend", colnames(GWAS))]
GWAS1=g

## PLOT ENRICHMENT FOR INTERESTING GENES ONLY ##
interesting.gene.eqtl <- read.table(file = "rg_pdr_npdr_gene_vs_GTex_v7_Full.csv", as.is=T,
                                   header=T, sep=",")
interesting.gene.eqtl$snp <- gsub("_[A-Z].*", "", interesting.gene.eqtl$variant_id)
interesting.gene.eqtl$gene_id <- gsub("\\..*", "", interesting.gene.eqtl$gene_id)
interesting.genes <- unique(interesting.gene.eqtl$gene_id)

ind <- which(GWAS1$chrpos %in% interesting.gene.eqtl$snp |
            GWAS1$rs %in% interesting.gene.eqtl$rs_id_dbSNP147_GRCh37p13)
GWAS1$int.gene.eqtl <- 0
GWAS1$int.gene.eqtl[ind] <- 1

m=merge(GWAS1,interesting.gene.eqtl, by.x = "chrpos", by.y = "snp")

## DETERMINE THE PROPORTION OF P-VALUES < .05 IN
#1) FULL GWAS 2) ALL EQL IN QWAS 3) EQTL OF 103 GENES IN GWAS
## 1)
gwas.all.p.05 = mean(GWAS1$META_pval <= .05, na.rm=T)
## 3)
ind <- GWAS1$chrpos %in% interesting.gene.eqtl$snp
gwas.103.p.05 <- mean(GWAS1$META_pval[ind] < 0.05)

## 2) change 54 to 101
eqtl.ind <- rowSums(GWAS1[,6:54]==1, na.rm=T)>0
gwas.eqtl.p.05 <- mean(GWAS1$META_pval[eqtl.ind] < 0.05, na.rm=T)

toplot <- data.frame( cat=c("All SNPs", "All eQTL", "eQTL from 103 genes"),
                      props =c(gwas.all.p.05, gwas.eqtl.p.05, gwas.103.p.05))
ses.gwas.all <- sqrt(gwas.all.p.05 * (1 - gwas.all.p.05) / sum(!is.na(GWAS$META_pval)))
ses.gwas.103.p.05 <- sqrt(gwas.103.p.05 * (1 - gwas.103.p.05) / sum(ind))
ses.gwas.eqtl.p.05 <- sqrt(gwas.eqtl.p.05 * (1 - gwas.eqtl.p.05) / sum(eqtl.ind))

```

```
toplot$ses <- c(ses.gwas.all, ses.gwas.eqtl.p.05, ses.gwas.103.p.05)
```

```
mean.comp <- data.frame(.y. = c("len","len","len"), group1 = c("All SNPs", "All SNPs", "All  
eQTL"),
```

```
    group2 = c("All eQTL", "eQTL from 103 genes", "eQTL from 103 genes"),  
    p = c(.01, .05, .001),  
    p.adj = c(.01, .05, .001),  
    p.format = c(.01, .05, .001),  
    p.signif = c("","*", "**"),  
    method = c("Wald","Wald","Wald"),  
    y.pos = c(0.06, 0.065, 0.070))
```

```
# calculating P values for the plot
```

```
diffs <- c(toplot$props[1] - toplot$props[2],  
           toplot$props[2] - toplot$props[3],  
           toplot$props[1] - toplot$props[3])  
vars <- c(toplot$ses[1]^2 + toplot$ses[2]^2,  
          toplot$ses[2]^2 + toplot$ses[3]^2,  
          toplot$ses[1]^2 + toplot$ses[3]^2)  
z <- diffs/sqrt(vars)  
ps <- (1 - pnorm(abs(z)))^2
```

```
options(digits=3)
```

```
ax.11.text <- element_text(size = 10)  
ay.11.text <- element_text(size = 10)  
p<-ggplot(data=toplot, aes(x=cat, y=props)) +  
  geom_bar(stat="identity",width=0.5, fill="steelblue")+  
  geom_errorbar(aes(ymin=props-1.96*ses, ymax=props+1.96*ses), width=.1,  
               position=position_dodge(.9)) +
```

```
  geom_signif(comparisons=list( c("All eQTL", "eQTL from 103 genes"),  
                                c("All SNPs", "eQTL from 103 genes")),  
              y_position=c(0.065, 0.07), tip_length=0, annotation=c("p = 0.0012", "p = 0.0023")) +  
  scale_y_continuous(breaks=seq(0,.06,by=.01)) +  
  xlab("") + ylab("Proportion p-values < 0.05") +  
  theme_classic()+  
  theme(panel.grid.major.x = element_line(size = 0.1, color = "grey"),  
        panel.grid.major.y = element_blank(),  
        panel.grid.minor = element_blank(),axis.text.x = ax.11.text,axis.text.y=ay.11.text
```

)

p
