# Supplementary material for: Integration of genomics and transcriptomics predicts diabetic retinopathy susceptibility genes
Source: eLife. 2020 Nov 9;9:e59980. doi: 10.7554/eLife.59980 (PMC7728435; doi:10.7554/eLife.59980)
Supplement: Figure 1—source data 1. [file elife-59980-fig1-data1.xlsx]

## Sheet: Table 1
SampleName rep Subject Treatment Group 1 1 1 1 T DwC 2 1 2 1 T DwC 3 1 3 1 T DwC 4 1 1 1 C DwC 5 1 2 1 C DwC 6 1 3 1 C DwC 7 8 4 2 T DwC 8 8 5 2 T DwC 9 8 6 2 T DwC 10 8 4 2 C DwC 11 8 5 2 C DwC 12 8 6 2 C DwC 13 2 7 3 T DwC 14 2 8 3 T DwC 15 2 9 3 T DwC 16 2 7 3 C DwC 17 2 8 3 C DwC 18 2 9 3 C DwC 19 3 10 4 T DwC 20 3 11 4 T DwC 21 3 12 4 T DwC 22 3 10 4 C DwC 23 3 11 4 C DwC 24 3 12 4 C DwC 25 …
29 4 14 5 C DwC 30 4 15 5 C DwC 31 5 16 6 T DwC 32 5 17 6 T DwC 33 5 18 6 T DwC 34 5 16 6 C DwC 35 5 17 6 C DwC 36 5 18 6 C DwC 37 6 19 7 T DwC 38 6 20 7 T DwC 39 6 21 7 T DwC 40 6 19 7 C DwC 41 6 20 7 C DwC 42 6 21 7 C DwC 43 7 22 8 T DwC 44 7 23 8 T DwC 45 7 24 8 T DwC 46 7 22 8 C DwC 47 7 23 8 C DwC 48 7 24 8 C DwC 49 12 25 9 T DwoC 50 12 26 9 T DwoC 51 12 27 9 T DwoC 52 12 25 9 C DwoC 53 12 2…
58 14 28 10 C DwoC 59 14 29 10 C DwoC 60 14 30 10 C DwoC 61 15 31 11 T DwoC 62 15 32 11 T DwoC 63 15 33 11 T DwoC 64 15 31 11 C DwoC 65 15 32 11 C DwoC 66 15 33 11 C DwoC 67 9 34 12 T DwoC 68 9 35 12 T DwoC 69 9 36 12 T DwoC 70 9 34 12 C DwoC 71 9 35 12 C DwoC 72 9 36 12 C DwoC 73 10 37 13 T DwoC 74 10 38 13 T DwoC 75 10 39 13 T DwoC 76 10 37 13 C DwoC 77 10 38 13 C DwoC 78 10 39 13 C DwoC 79 11 …
87 13 45 15 T DwoC 88 13 43 15 C DwoC 89 13 44 15 C DwoC 90 13 45 15 C DwoC 91 21 46 16 T NoD 92 21 47 16 T NoD 93 21 48 16 T NoD 94 21 46 16 C NoD 95 21 47 16 C NoD 96 21 48 16 C NoD 97 22 49 17 T NoD 98 22 50 17 T NoD 99 22 51 17 T NoD 100 22 49 17 C NoD 101 22 50 17 C NoD 102 22 51 17 C NoD 103 16 52 18 T NoD 104 16 53 18 T NoD 105 16 54 18 T NoD 106 16 52 18 C NoD 107 16 53 18 C NoD 108 16 54…
116 18 59 20 T NoD 117 18 60 20 T NoD 118 18 58 20 C NoD 119 18 59 20 C NoD 120 18 60 20 C NoD 121 19 61 21 T NoD 122 19 62 21 T NoD 123 19 63 21 T NoD 124 19 61 21 C NoD 125 19 62 21 C NoD 126 19 63 21 C NoD 127 20 64 22 T NoD 128 20 65 22 T NoD 129 20 66 22 T NoD 130 20 64 22 C NoD 131 20 65 22 C NoD 132 20 66 22 C NoD
