# Supplementary material for: Integration of genomics and transcriptomics predicts diabetic retinopathy susceptibility genes
Source: eLife. 2020 Nov 9;9:e59980. doi: 10.7554/eLife.59980 (PMC7728435; doi:10.7554/eLife.59980)
Supplement: Figure 1—source data 2. [file elife-59980-fig1-data2.xlsx]

## Sheet: gsea_report_for_na_pos_15553542
NAME	GS<br> follow link to MSigDB	GS DETAILS	SIZE	ES	NES	NOM p-val	FDR q-val	FWER p-val	RANK AT MAX	LEADING EDGE
GNF2_CCNA2	GNF2_CCNA2	Details ...	66	0.736005	2.61738	0	0	0	2190	tags=76%, list=19%, signal=93%
GNF2_PCNA	GNF2_PCNA	Details ...	64	0.705039	2.51136	0	0	0	2190	tags=69%, list=19%, signal=84%
GNF2_CDC2	GNF2_CDC2	Details ...	58	0.726447	2.51034	0	0	0	2319	tags=76%, list=20%, signal=94%
GO_DNA_PACKAGING_COMPLEX	GO_DNA_PACKAGING_COMPLEX	Details ...	77	0.674915	2.48649	0	0	0	1681	tags=51%, list=15%, signal=59%
GNF2_CDC20	GNF2_CDC20	Details ...	52	0.712857	2.47066	0	0	0	2190	tags=71%, list=19%, signal=87%
ROSTY_CERVICAL_CANCER_PROLIFERATION_CLUSTER	ROSTY_CERVICAL_CANCER_PROLIFERATION_CLUSTER	Details ...	126	0.62045	2.46981	0	0	0	2994	tags=69%, list=26%, signal=92%
HALLMARK_E2F_TARGETS	HALLMARK_E2F_TARGETS	Details ...	189	0.592437	2.46931	0	0	0	2457	tags=52%, list=21%, signal=65%
GNF2_CENPF	GNF2_CENPF	Details ...	57	0.712762	2.45539	0	0	0	2190	tags=72%, list=19%, signal=88%
REACTOME_TELOMERE_MAINTENANCE	REACTOME_TELOMERE_MAINTENANCE	Details ...	64	0.686248	2.43049	0	0	0	1926	tags=61%, list=17%, signal=73%
REACTOME_MEIOTIC_RECOMBINATION	REACTOME_MEIOTIC_RECOMBINATION	Details ...	67	0.685558	2.42814	0	0	0	1951	tags=61%, list=17%, signal=73%
GNF2_RRM1	GNF2_RRM1	Details ...	83	0.646528	2.41275	0	0	0	2190	tags=58%, list=19%, signal=71%
REACTOME_RNA_POL_I_PROMOTER_OPENING	REACTOME_RNA_POL_I_PROMOTER_OPENING	Details ...	50	0.701431	2.41231	0	0	0	1681	tags=60%, list=15%, signal=70%
REACTOME_MEIOSIS	REACTOME_MEIOSIS	Details ...	87	0.646847	2.40609	0	0	0	1951	tags=55%, list=17%, signal=66%
REACTOME_AMYLOIDS	REACTOME_AMYLOIDS	Details ...	54	0.702853	2.40225	0	0	0	1681	tags=56%, list=15%, signal=65%
GNF2_CCNB2	GNF2_CCNB2	Details ...	53	0.701128	2.40078	0	0	0	2311	tags=72%, list=20%, signal=89%
REACTOME_CHROMOSOME_MAINTENANCE	REACTOME_CHROMOSOME_MAINTENANCE	Details ...	96	0.631044	2.39547	0	0	0	1926	tags=51%, list=17%, signal=61%
GO_PROTEIN_DNA_COMPLEX	GO_PROTEIN_DNA_COMPLEX	Details ...	132	0.600182	2.39212	0	0	0	1954	tags=46%, list=17%, signal=55%
CROONQUIST_IL6_DEPRIVATION_DN	CROONQUIST_IL6_DEPRIVATION_DN	Details ...	88	0.641964	2.39016	0	0	0	2525	tags=66%, list=22%, signal=84%
GRAHAM_NORMAL_QUIESCENT_VS_NORMAL_DIVIDING_DN	GRAHAM_NORMAL_QUIESCENT_VS_NORMAL_DIVIDING_DN	Details ...	79	0.644139	2.38652	0	0	0	1827	tags=49%, list=16%, signal=58%
GNF2_HMMR	GNF2_HMMR	Details ...	46	0.716542	2.38104	0	0	0	2190	tags=74%, list=19%, signal=91%
CHANG_CYCLING_GENES	CHANG_CYCLING_GENES	Details ...	133	0.592404	2.37751	0	0	0	2476	tags=53%, list=21%, signal=67%
GNF2_ESPL1	GNF2_ESPL1	Details ...	35	0.761749	2.36785	0	0	0	2190	tags=80%, list=19%, signal=98%
ZHOU_CELL_CYCLE_GENES_IN_IR_RESPONSE_6HR	ZHOU_CELL_CYCLE_GENES_IN_IR_RESPONSE_6HR	Details ...	74	0.648799	2.3642	0	0	0	1652	tags=46%, list=14%, signal=53%
WHITEFORD_PEDIATRIC_CANCER_MARKERS	WHITEFORD_PEDIATRIC_CANCER_MARKERS	Details ...	101	0.616013	2.36316	0	0	0	2254	tags=53%, list=19%, signal=66%
ISHIDA_E2F_TARGETS	ISHIDA_E2F_TARGETS	Details ...	48	0.702551	2.36191	0	0	0	2150	tags=65%, list=19%, signal=79%
GNF2_RFC4	GNF2_RFC4	Details ...	57	0.684464	2.36079	0	0	0	2975	tags=75%, list=26%, signal=101%
SONG_TARGETS_OF_IE86_CMV_PROTEIN	SONG_TARGETS_OF_IE86_CMV_PROTEIN	Details ...	56	0.676744	2.34878	0	0	0	2403	tags=64%, list=21%, signal=81%
GNF2_MCM4	GNF2_MCM4	Details ...	51	0.692853	2.34867	0	0	0	2190	tags=71%, list=19%, signal=87%
ZHOU_CELL_CYCLE_GENES_IN_IR_RESPONSE_24HR	ZHOU_CELL_CYCLE_GENES_IN_IR_RESPONSE_24HR	Details ...	110	0.609966	2.34371	0	0	0	2449	tags=53%, list=21%, signal=66%
GNF2_CENPE	GNF2_CENPE	Details ...	38	0.723195	2.34306	0	0	0	2190	tags=74%, list=19%, signal=91%
GNF2_RRM2	GNF2_RRM2	Details ...	39	0.73083	2.34053	0	0	0	2190	tags=77%, list=19%, signal=95%
GNF2_CKS2	GNF2_CKS2	Details ...	49	0.694762	2.33637	0	0	0	2975	tags=84%, list=26%, signal=112%
GSE37532_WT_VS_PPARG_KO_VISCERAL_ADIPOSE_TISSUE_TREG_UP	GSE37532_WT_VS_PPARG_KO_VISCERAL_ADIPOSE_TISSUE_TREG_UP	Details ...	171	0.56221	2.33033	0	0	0	2399	tags=48%, list=21%, signal=60%
MISSIAGLIA_REGULATED_BY_METHYLATION_DN	MISSIAGLIA_REGULATED_BY_METHYLATION_DN	Details ...	109	0.599369	2.32463	0	0	0	1858	tags=43%, list=16%, signal=51%
KRCTCNNNNMANAGC_UNKNOWN	KRCTCNNNNMANAGC_UNKNOWN	Details ...	48	0.685992	2.31849	0	0	0	1681	tags=50%, list=15%, signal=58%
DUTERTRE_ESTRADIOL_RESPONSE_24HR_UP	DUTERTRE_ESTRADIOL_RESPONSE_24HR_UP	Details ...	262	0.530508	2.31544	0	0	0	2203	tags=43%, list=19%, signal=52%
KONG_E2F3_TARGETS	KONG_E2F3_TARGETS	Details ...	88	0.619108	2.31347	0	0	0	2311	tags=55%, list=20%, signal=68%
SOTIRIOU_BREAST_CANCER_GRADE_1_VS_3_UP	SOTIRIOU_BREAST_CANCER_GRADE_1_VS_3_UP	Details ...	140	0.574067	2.3111	0	0	0	2190	tags=47%, list=19%, signal=57%
GSE15750_DAY6_VS_DAY10_TRAF6KO_EFF_CD8_TCELL_UP	GSE15750_DAY6_VS_DAY10_TRAF6KO_EFF_CD8_TCELL_UP	Details ...	170	0.559419	2.30653	0	1.8e-05	0.001	2336	tags=49%, list=20%, signal=60%
GNF2_FEN1	GNF2_FEN1	Details ...	53	0.680001	2.29831	0	1.76e-05	0.001	2970	tags=77%, list=26%, signal=104%
GNF2_MKI67	GNF2_MKI67	Details ...	26	0.775291	2.28787	0	1.72e-05	0.001	2190	tags=85%, list=19%, signal=104%
CHR6P22	CHR6P22	Details ...	66	0.649643	2.28761	0	1.67e-05	0.001	1978	tags=45%, list=17%, signal=55%
GRAHAM_CML_DIVIDING_VS_NORMAL_QUIESCENT_UP	GRAHAM_CML_DIVIDING_VS_NORMAL_QUIESCENT_UP	Details ...	150	0.560101	2.2811	0	1.64e-05	0.001	1827	tags=41%, list=16%, signal=48%
GOBERT_OLIGODENDROCYTE_DIFFERENTIATION_UP	GOBERT_OLIGODENDROCYTE_DIFFERENTIATION_UP	Details ...	472	0.494187	2.28092	0	1.6e-05	0.001	2329	tags=39%, list=20%, signal=47%
CROONQUIST_NRAS_SIGNALING_DN	CROONQUIST_NRAS_SIGNALING_DN	Details ...	67	0.651695	2.27755	0	1.56e-05	0.001	1846	tags=58%, list=16%, signal=69%
ZHAN_MULTIPLE_MYELOMA_PR_UP	ZHAN_MULTIPLE_MYELOMA_PR_UP	Details ...	41	0.701294	2.27719	0	3.05e-05	0.002	2190	tags=66%, list=19%, signal=81%
REACTOME_DEPOSITION_OF_NEW_CENPA_CONTAINING_NUCLEOSOMES_AT_THE_CENTROMERE	REACTOME_DEPOSITION_OF_NEW_CENPA_CONTAINING_NUCLEOSOMES_AT_THE_CENTROMERE	Details ...	50	0.68027	2.27463	0	2.99e-05	0.002	1594	tags=52%, list=14%, signal=60%
RUIZ_TNC_TARGETS_DN	RUIZ_TNC_TARGETS_DN	Details ...	116	0.584296	2.27242	0	2.93e-05	0.002	2478	tags=54%, list=21%, signal=68%
MODULE_54	MODULE_54	Details ...	217	0.531173	2.27062	0	2.87e-05	0.002	2311	tags=45%, list=20%, signal=55%
MODULE_552	MODULE_552	Details ...	15	0.861491	2.26765	0	2.81e-05	0.002	694	tags=60%, list=6%, signal=64%
GNF2_SMC4L1	GNF2_SMC4L1	Details ...	80	0.611401	2.25661	0	2.75e-05	0.002	2975	tags=73%, list=26%, signal=97%
GNF2_BUB1B	GNF2_BUB1B	Details ...	48	0.67466	2.25527	0	2.7e-05	0.002	2165	tags=67%, list=19%, signal=82%
REACTOME_TRANSCRIPTION	REACTOME_TRANSCRIPTION	Details ...	181	0.543368	2.25321	0	2.65e-05	0.002	2053	tags=40%, list=18%, signal=48%
REACTOME_RNA_POL_I_RNA_POL_III_AND_MITOCHONDRIAL_TRANSCRIPTION	REACTOME_RNA_POL_I_RNA_POL_III_AND_MITOCHONDRIAL_TRANSCRIPTION	Details ...	105	0.580692	2.25242	0	2.6e-05	0.002	1989	tags=47%, list=17%, signal=56%
FLORIO_NEOCORTEX_BASAL_RADIAL_GLIA_DN	FLORIO_NEOCORTEX_BASAL_RADIAL_GLIA_DN	Details ...	152	0.550434	2.25111	0	3.84e-05	0.003	2387	tags=51%, list=21%, signal=63%
REACTOME_PACKAGING_OF_TELOMERE_ENDS	REACTOME_PACKAGING_OF_TELOMERE_ENDS	Details ...	38	0.703217	2.25004	0	5.01e-05	0.004	1850	tags=66%, list=16%, signal=78%
REACTOME_MEIOTIC_SYNAPSIS	REACTOME_MEIOTIC_SYNAPSIS	Details ...	53	0.657481	2.2436	0	4.92e-05	0.004	1594	tags=53%, list=14%, signal=61%
GNF2_RFC3	GNF2_RFC3	Details ...	40	0.682876	2.23488	0	4.84e-05	0.004	2975	tags=78%, list=26%, signal=104%
MORI_LARGE_PRE_BII_LYMPHOCYTE_UP	MORI_LARGE_PRE_BII_LYMPHOCYTE_UP	Details ...	77	0.611192	2.23268	0	4.75e-05	0.004	2288	tags=57%, list=20%, signal=71%
MODULE_168	MODULE_168	Details ...	19	0.813451	2.2287	0	4.68e-05	0.004	701	tags=47%, list=6%, signal=50%
MORI_IMMATURE_B_LYMPHOCYTE_DN	MORI_IMMATURE_B_LYMPHOCYTE_DN	Details ...	83	0.600009	2.2278	0	4.6e-05	0.004	1609	tags=42%, list=14%, signal=49%
GO_CHROMATIN_SILENCING	GO_CHROMATIN_SILENCING	Details ...	69	0.612542	2.22281	0	5.66e-05	0.005	2045	tags=46%, list=18%, signal=56%
PUJANA_XPRSS_INT_NETWORK	PUJANA_XPRSS_INT_NETWORK	Details ...	158	0.535734	2.21009	0	6.68e-05	0.006	2531	tags=51%, list=22%, signal=65%
GNF2_CKS1B	GNF2_CKS1B	Details ...	37	0.683239	2.20927	0	6.57e-05	0.006	2165	tags=65%, list=19%, signal=80%
GNF2_TTK	GNF2_TTK	Details ...	36	0.708241	2.20389	0	6.47e-05	0.006	2190	tags=72%, list=19%, signal=89%
KAMMINGA_EZH2_TARGETS	KAMMINGA_EZH2_TARGETS	Details ...	39	0.685241	2.20357	0	6.37e-05	0.006	2253	tags=59%, list=19%, signal=73%
GNF2_H2AFX	GNF2_H2AFX	Details ...	29	0.728458	2.19382	0	7.31e-05	0.007	1461	tags=66%, list=13%, signal=75%
AMUNDSON_GAMMA_RADIATION_RESPONSE	AMUNDSON_GAMMA_RADIATION_RESPONSE	Details ...	39	0.666893	2.19364	0	7.21e-05	0.007	1756	tags=51%, list=15%, signal=60%
GSE15750_DAY6_VS_DAY10_EFF_CD8_TCELL_UP	GSE15750_DAY6_VS_DAY10_EFF_CD8_TCELL_UP	Details ...	171	0.52793	2.19188	0	7.1e-05	0.007	2259	tags=44%, list=20%, signal=54%
MODULE_189	MODULE_189	Details ...	21	0.776629	2.18959	0	0.0001	0.01	694	tags=43%, list=6%, signal=46%
REACTOME_RNA_POL_I_TRANSCRIPTION	REACTOME_RNA_POL_I_TRANSCRIPTION	Details ...	75	0.602814	2.18838	0	9.88e-05	0.01	1850	tags=49%, list=16%, signal=58%
GSE14415_TCONV_VS_FOXP3_KO_INDUCED_TREG_DN	GSE14415_TCONV_VS_FOXP3_KO_INDUCED_TREG_DN	Details ...	162	0.528624	2.18404	0	0.000117	0.012	1858	tags=39%, list=16%, signal=46%
MODULE_127	MODULE_127	Details ...	22	0.768789	2.18232	0	0.000115	0.012	694	tags=41%, list=6%, signal=43%
HOFFMANN_LARGE_TO_SMALL_PRE_BII_LYMPHOCYTE_UP	HOFFMANN_LARGE_TO_SMALL_PRE_BII_LYMPHOCYTE_UP	Details ...	139	0.542944	2.18107	0	0.000114	0.012	2311	tags=43%, list=20%, signal=53%
REACTOME_CELL_CYCLE	REACTOME_CELL_CYCLE	Details ...	355	0.48657	2.17891	0	0.000121	0.013	2448	tags=41%, list=21%, signal=51%
MODULE_222	MODULE_222	Details ...	19	0.802997	2.17882	0	0.00012	0.013	701	tags=47%, list=6%, signal=50%
GNF2_SMC2L1	GNF2_SMC2L1	Details ...	30	0.698599	2.17817	0	0.000127	0.014	2975	tags=80%, list=26%, signal=107%
GO_CHROMATIN_ASSEMBLY_OR_DISASSEMBLY	GO_CHROMATIN_ASSEMBLY_OR_DISASSEMBLY	Details ...	135	0.541125	2.17442	0	0.000126	0.014	2381	tags=44%, list=21%, signal=55%
PUJANA_BRCA_CENTERED_NETWORK	PUJANA_BRCA_CENTERED_NETWORK	Details ...	111	0.562255	2.17227	0	0.000124	0.014	2650	tags=55%, list=23%, signal=71%
GSE45365_WT_VS_IFNAR_KO_CD11B_DC_MCMV_INFECTION_DN	GSE45365_WT_VS_IFNAR_KO_CD11B_DC_MCMV_INFECTION_DN	Details ...	80	0.579282	2.16533	0	0.00014	0.016	1855	tags=41%, list=16%, signal=49%
MARKEY_RB1_ACUTE_LOF_UP	MARKEY_RB1_ACUTE_LOF_UP	Details ...	193	0.520221	2.16523	0	0.000138	0.016	2385	tags=43%, list=21%, signal=53%
REN_BOUND_BY_E2F	REN_BOUND_BY_E2F	Details ...	60	0.624751	2.16497	0	0.000137	0.016	2987	tags=68%, list=26%, signal=92%
GO_DNA_CONFORMATION_CHANGE	GO_DNA_CONFORMATION_CHANGE	Details ...	217	0.504822	2.15364	0	0.00016	0.019	2381	tags=43%, list=21%, signal=54%
BURTON_ADIPOGENESIS_3	BURTON_ADIPOGENESIS_3	Details ...	92	0.566615	2.1459	0	0.000183	0.022	1890	tags=45%, list=16%, signal=53%
GO_NEGATIVE_REGULATION_OF_GENE_EXPRESSION_EPIGENETIC	GO_NEGATIVE_REGULATION_OF_GENE_EXPRESSION_EPIGENETIC	Details ...	86	0.570694	2.14439	0	0.000181	0.022	1951	tags=42%, list=17%, signal=50%
HORIUCHI_WTAP_TARGETS_DN	HORIUCHI_WTAP_TARGETS_DN	Details ...	265	0.496445	2.13863	0	0.00022	0.026	2351	tags=41%, list=20%, signal=50%
GO_DNA_PACKAGING	GO_DNA_PACKAGING	Details ...	142	0.53042	2.13169	0	0.000241	0.029	2079	tags=42%, list=18%, signal=51%
GO_NUCLEAR_NUCLEOSOME	GO_NUCLEAR_NUCLEOSOME	Details ...	28	0.710495	2.13035	0	0.000238	0.029	1681	tags=57%, list=15%, signal=67%
GSE30962_PRIMARY_VS_SECONDARY_ACUTE_LCMV_INF_CD8_TCELL_UP	GSE30962_PRIMARY_VS_SECONDARY_ACUTE_LCMV_INF_CD8_TCELL_UP	Details ...	167	0.516176	2.13015	0	0.000236	0.029	1914	tags=38%, list=17%, signal=45%
KOBAYASHI_EGFR_SIGNALING_24HR_DN	KOBAYASHI_EGFR_SIGNALING_24HR_DN	Details ...	216	0.499904	2.1257	0	0.000272	0.034	2482	tags=50%, list=21%, signal=62%
TTTNNANAGCYR_UNKNOWN	TTTNNANAGCYR_UNKNOWN	Details ...	82	0.580676	2.12351	0	0.000269	0.034	1681	tags=37%, list=15%, signal=42%
KANG_DOXORUBICIN_RESISTANCE_UP	KANG_DOXORUBICIN_RESISTANCE_UP	Details ...	50	0.63078	2.11827	0	0.000289	0.037	2434	tags=70%, list=21%, signal=88%
BRACHAT_RESPONSE_TO_CISPLATIN	BRACHAT_RESPONSE_TO_CISPLATIN	Details ...	18	0.771661	2.11788	0	0.000293	0.038	603	tags=28%, list=5%, signal=29%
FURUKAWA_DUSP6_TARGETS_PCI35_DN	FURUKAWA_DUSP6_TARGETS_PCI35_DN	Details ...	55	0.605948	2.11293	0	0.00032	0.042	1975	tags=55%, list=17%, signal=65%
KEGG_DNA_REPLICATION	KEGG_DNA_REPLICATION	Details ...	35	0.660083	2.10123	0	0.000405	0.054	2180	tags=54%, list=19%, signal=67%
BASAKI_YBX1_TARGETS_UP	BASAKI_YBX1_TARGETS_UP	Details ...	228	0.496127	2.09997	0	0.000408	0.055	2485	tags=43%, list=21%, signal=54%
GO_CHROMOSOMAL_REGION	GO_CHROMOSOMAL_REGION	Details ...	273	0.479452	2.09726	0	0.000425	0.058	2295	tags=40%, list=20%, signal=49%
ACEVEDO_LIVER_CANCER_WITH_H3K9ME3_DN	ACEVEDO_LIVER_CANCER_WITH_H3K9ME3_DN	Details ...	75	0.56349	2.07497	0	0.00057	0.077	1477	tags=32%, list=13%, signal=36%
GSE39556_CD8A_DC_VS_NK_CELL_MOUSE_3H_POST_POLYIC_INJ_UP	GSE39556_CD8A_DC_VS_NK_CELL_MOUSE_3H_POST_POLYIC_INJ_UP	Details ...	180	0.50042	2.07242	0	0.000621	0.085	2223	tags=39%, list=19%, signal=48%
HALLMARK_G2M_CHECKPOINT	HALLMARK_G2M_CHECKPOINT	Details ...	183	0.501699	2.06893	0	0.00065	0.09	2454	tags=46%, list=21%, signal=57%
GSE13547_CTRL_VS_ANTI_IGM_STIM_BCELL_12H_UP	GSE13547_CTRL_VS_ANTI_IGM_STIM_BCELL_12H_UP		160	0.506172	2.06657	0	0.000665	0.093	2201	tags=44%, list=19%, signal=53%
REACTOME_PROCESSING_OF_CAPPED_INTRON_CONTAINING_PRE_MRNA	REACTOME_PROCESSING_OF_CAPPED_INTRON_CONTAINING_PRE_MRNA		127	0.524587	2.06227	0	0.000741	0.104	2768	tags=46%, list=24%, signal=59%
GO_PROTEIN_DNA_COMPLEX_SUBUNIT_ORGANIZATION	GO_PROTEIN_DNA_COMPLEX_SUBUNIT_ORGANIZATION		181	0.494427	2.06124	0	0.000747	0.106	2022	tags=36%, list=17%, signal=43%
MODY_HIPPOCAMPUS_PRENATAL	MODY_HIPPOCAMPUS_PRENATAL		41	0.64518	2.05477	0	0.000801	0.113	1788	tags=49%, list=15%, signal=57%
GNF2_MCM5	GNF2_MCM5		59	0.588753	2.0537	0	0.0008	0.114	2987	tags=68%, list=26%, signal=91%
LEE_EARLY_T_LYMPHOCYTE_UP	LEE_EARLY_T_LYMPHOCYTE_UP		85	0.546208	2.0532	0	0.000792	0.114	2171	tags=48%, list=19%, signal=59%
LI_WILMS_TUMOR_VS_FETAL_KIDNEY_1_DN	LI_WILMS_TUMOR_VS_FETAL_KIDNEY_1_DN		137	0.510324	2.05088	0	0.000824	0.118	2765	tags=47%, list=24%, signal=62%
FISCHER_G2_M_CELL_CYCLE	FISCHER_G2_M_CELL_CYCLE		198	0.486899	2.04953	0	0.000829	0.12	2311	tags=43%, list=20%, signal=53%
GO_GENE_SILENCING	GO_GENE_SILENCING		155	0.498609	2.04544	0	0.00088	0.129	1754	tags=34%, list=15%, signal=39%
REACTOME_MRNA_SPLICING	REACTOME_MRNA_SPLICING		100	0.527629	2.03407	0	0.00102435	0.151	2768	tags=48%, list=24%, signal=63%
BURTON_ADIPOGENESIS_PEAK_AT_24HR	BURTON_ADIPOGENESIS_PEAK_AT_24HR		36	0.6417	2.03283	0	0.00102143	0.152	2288	tags=67%, list=20%, signal=83%
WHITFIELD_CELL_CYCLE_LITERATURE	WHITFIELD_CELL_CYCLE_LITERATURE		43	0.622988	2.03004	0	0.00105627	0.158	1756	tags=49%, list=15%, signal=57%
GSE24634_TREG_VS_TCONV_POST_DAY3_IL4_CONVERSION_UP	GSE24634_TREG_VS_TCONV_POST_DAY3_IL4_CONVERSION_UP		178	0.487325	2.02822	0	0.00107155	0.161	1626	tags=31%, list=14%, signal=35%
BRACHAT_RESPONSE_TO_METHOTREXATE_UP	BRACHAT_RESPONSE_TO_METHOTREXATE_UP		18	0.752221	2.02808	0	0.00106215	0.161	633	tags=33%, list=5%, signal=35%
REACTOME_DNA_STRAND_ELONGATION	REACTOME_DNA_STRAND_ELONGATION		29	0.671966	2.0263	0	0.00107716	0.164	2150	tags=59%, list=19%, signal=72%
PUJANA_BRCA2_PCC_NETWORK	PUJANA_BRCA2_PCC_NETWORK		369	0.449292	2.02254	0	0.00112804	0.172	2542	tags=42%, list=22%, signal=52%
OXFORD_RALA_OR_RALB_TARGETS_UP	OXFORD_RALA_OR_RALB_TARGETS_UP		46	0.60447	2.02252	0	0.00112435	0.172	1417	tags=48%, list=12%, signal=54%
NAKAYAMA_SOFT_TISSUE_TUMORS_PCA2_UP	NAKAYAMA_SOFT_TISSUE_TUMORS_PCA2_UP		54	0.586917	2.01995	0	0.00118	0.182	2177	tags=54%, list=19%, signal=66%
GSE36476_CTRL_VS_TSST_ACT_72H_MEMORY_CD4_TCELL_OLD_DN	GSE36476_CTRL_VS_TSST_ACT_72H_MEMORY_CD4_TCELL_OLD_DN		190	0.4795	2.01928	0	0.0011818	0.184	1707	tags=38%, list=15%, signal=44%
MODULE_421	MODULE_421		26	0.69968	2.01623	0	0.00124775	0.193	701	tags=35%, list=6%, signal=37%
GSE24634_TREG_VS_TCONV_POST_DAY7_IL4_CONVERSION_UP	GSE24634_TREG_VS_TCONV_POST_DAY7_IL4_CONVERSION_UP		161	0.491886	2.01294	0	0.00134134	0.204	1827	tags=40%, list=16%, signal=47%
GSE21546_WT_VS_ELK1_KO_ANTI_CD3_STIM_DP_THYMOCYTES_DN	GSE21546_WT_VS_ELK1_KO_ANTI_CD3_STIM_DP_THYMOCYTES_DN		154	0.493655	2.01118	0	0.00135901	0.208	2632	tags=41%, list=23%, signal=52%
GNF2_PA2G4	GNF2_PA2G4		76	0.546462	2.01105	0	0.00134796	0.208	1803	tags=41%, list=16%, signal=48%
REACTOME_MITOTIC_PROMETAPHASE	REACTOME_MITOTIC_PROMETAPHASE		78	0.540327	2.00846	0	0.00141056	0.219	1668	tags=40%, list=14%, signal=46%
GRAHAM_CML_QUIESCENT_VS_NORMAL_QUIESCENT_UP	GRAHAM_CML_QUIESCENT_VS_NORMAL_QUIESCENT_UP		60	0.578609	2.00693	0	0.00143866	0.225	1827	tags=45%, list=16%, signal=53%
GNF2_BUB1	GNF2_BUB1		26	0.688558	2.00579	0	0.00146048	0.228	3230	tags=85%, list=28%, signal=117%
GSE21546_UNSTIM_VS_ANTI_CD3_STIM_DP_THYMOCYTES_DN	GSE21546_UNSTIM_VS_ANTI_CD3_STIM_DP_THYMOCYTES_DN		148	0.495943	2.0027	0	0.00153694	0.236	1791	tags=33%, list=15%, signal=39%
MODULE_534	MODULE_534		16	0.757262	1.9952	0	0.00174329	0.268	1140	tags=50%, list=10%, signal=55%
GO_PROTEIN_HETEROTETRAMERIZATION	GO_PROTEIN_HETEROTETRAMERIZATION		29	0.645733	1.99517	0.00180832	0.00172977	0.268	1951	tags=55%, list=17%, signal=66%
GO_NEGATIVE_REGULATION_OF_CELL_DIVISION	GO_NEGATIVE_REGULATION_OF_CELL_DIVISION		49	0.588436	1.99418	0	0.00174324	0.272	1553	tags=35%, list=13%, signal=40%
GO_SISTER_CHROMATID_SEGREGATION	GO_SISTER_CHROMATID_SEGREGATION		150	0.493283	1.9933	0	0.00174582	0.275	2288	tags=42%, list=20%, signal=52%
GSE14415_INDUCED_VS_NATURAL_TREG_DN	GSE14415_INDUCED_VS_NATURAL_TREG_DN		154	0.491843	1.99237	0	0.00176437	0.28	1890	tags=39%, list=16%, signal=46%
GO_TELOMERE_ORGANIZATION	GO_TELOMERE_ORGANIZATION		91	0.532018	1.99136	0	0.0017722	0.283	2235	tags=47%, list=19%, signal=58%
KAUFFMANN_MELANOMA_RELAPSE_UP	KAUFFMANN_MELANOMA_RELAPSE_UP		56	0.574586	1.99012	0	0.00177464	0.284	1461	tags=39%, list=13%, signal=45%
ZHANG_TLX_TARGETS_60HR_DN	ZHANG_TLX_TARGETS_60HR_DN		244	0.461508	1.98997	0	0.00177184	0.286	3230	tags=48%, list=28%, signal=65%
GSE36476_CTRL_VS_TSST_ACT_40H_MEMORY_CD4_TCELL_YOUNG_DN	GSE36476_CTRL_VS_TSST_ACT_40H_MEMORY_CD4_TCELL_YOUNG_DN		180	0.482675	1.98908	0	0.00176905	0.288	2193	tags=42%, list=19%, signal=51%
WHITFIELD_CELL_CYCLE_G2_M	WHITFIELD_CELL_CYCLE_G2_M		166	0.485414	1.98577	0	0.00184816	0.302	2395	tags=42%, list=21%, signal=52%
SHEDDEN_LUNG_CANCER_POOR_SURVIVAL_A6	SHEDDEN_LUNG_CANCER_POOR_SURVIVAL_A6		376	0.435801	1.98338	0	0.00192057	0.316	2201	tags=36%, list=19%, signal=43%
GSE14415_NATURAL_TREG_VS_TCONV_DN	GSE14415_NATURAL_TREG_VS_TCONV_DN		150	0.48466	1.98053	0	0.0019925	0.328	2311	tags=43%, list=20%, signal=53%
GO_RNA_SPLICING_VIA_TRANSESTERIFICATION_REACTIONS	GO_RNA_SPLICING_VIA_TRANSESTERIFICATION_REACTIONS		240	0.461804	1.97591	0	0.00214234	0.347	2768	tags=41%, list=24%, signal=53%
GSE35543_IN_VITRO_ITREG_VS_CONVERTED_EX_ITREG_UP	GSE35543_IN_VITRO_ITREG_VS_CONVERTED_EX_ITREG_UP		148	0.486426	1.97567	0	0.00212715	0.347	1890	tags=36%, list=16%, signal=42%
GO_CONDENSED_CHROMOSOME_CENTROMERIC_REGION	GO_CONDENSED_CHROMOSOME_CENTROMERIC_REGION		82	0.52947	1.97073	0	0.00229455	0.371	2097	tags=46%, list=18%, signal=56%
REACTOME_MRNA_PROCESSING	REACTOME_MRNA_PROCESSING		144	0.48906	1.96927	0	0.00235197	0.381	2768	tags=43%, list=24%, signal=56%
VILLANUEVA_LIVER_CANCER_KRT19_UP	VILLANUEVA_LIVER_CANCER_KRT19_UP		139	0.489519	1.96876	0	0.00235016	0.383	2266	tags=37%, list=20%, signal=46%
GO_KINETOCHORE	GO_KINETOCHORE		101	0.514682	1.9683	0	0.0023532	0.386	2120	tags=43%, list=18%, signal=52%
GSE36476_CTRL_VS_TSST_ACT_72H_MEMORY_CD4_TCELL_YOUNG_DN	GSE36476_CTRL_VS_TSST_ACT_72H_MEMORY_CD4_TCELL_YOUNG_DN		184	0.47651	1.96078	0	0.0026202	0.42	2193	tags=42%, list=19%, signal=51%
REACTOME_EXTENSION_OF_TELOMERES	REACTOME_EXTENSION_OF_TELOMERES		26	0.668198	1.96032	0	0.00262137	0.421	2987	tags=69%, list=26%, signal=93%
REACTOME_DNA_REPLICATION	REACTOME_DNA_REPLICATION		175	0.470635	1.95885	0	0.00267439	0.432	2289	tags=41%, list=20%, signal=50%
GO_TRANSLATION_PREINITIATION_COMPLEX	GO_TRANSLATION_PREINITIATION_COMPLEX		16	0.745091	1.95774	0	0.00268459	0.434	1521	tags=50%, list=13%, signal=57%
SARRIO_EPITHELIAL_MESENCHYMAL_TRANSITION_UP	SARRIO_EPITHELIAL_MESENCHYMAL_TRANSITION_UP		153	0.479011	1.9566	0	0.00271343	0.438	2253	tags=39%, list=19%, signal=48%
LE_EGR2_TARGETS_UP	LE_EGR2_TARGETS_UP		94	0.5134	1.95484	0	0.00276971	0.448	1756	tags=39%, list=15%, signal=46%
TANG_SENESCENCE_TP53_TARGETS_DN	TANG_SENESCENCE_TP53_TARGETS_DN		49	0.587656	1.951	0	0.0029495	0.467	2814	tags=65%, list=24%, signal=86%
GREENBAUM_E2A_TARGETS_UP	GREENBAUM_E2A_TARGETS_UP		31	0.620609	1.95097	0	0.00293022	0.467	2165	tags=52%, list=19%, signal=63%
GO_DNA_REPLICATION	GO_DNA_REPLICATION		170	0.467544	1.95093	0	0.00291575	0.468	2203	tags=39%, list=19%, signal=47%
GO_CHROMATIN_SILENCING_AT_RDNA	GO_CHROMATIN_SILENCING_AT_RDNA		34	0.618669	1.95055	0.00190114	0.00291054	0.469	1951	tags=47%, list=17%, signal=56%
EGUCHI_CELL_CYCLE_RB1_TARGETS	EGUCHI_CELL_CYCLE_RB1_TARGETS		23	0.692764	1.94921	0	0.00297725	0.48	2311	tags=65%, list=20%, signal=81%
PUJANA_BREAST_CANCER_WITH_BRCA1_MUTATED_UP	PUJANA_BREAST_CANCER_WITH_BRCA1_MUTATED_UP		53	0.56777	1.94234	0	0.00331928	0.524	2947	tags=60%, list=25%, signal=81%
MODULE_320	MODULE_320		16	0.733105	1.94109	0.00187266	0.00336033	0.53	2886	tags=88%, list=25%, signal=116%
GSE45365_HEALTHY_VS_MCMV_INFECTION_CD11B_DC_DN	GSE45365_HEALTHY_VS_MCMV_INFECTION_CD11B_DC_DN		102	0.506286	1.93992	0	0.00340076	0.535	2255	tags=45%, list=19%, signal=56%
GO_CONDENSED_CHROMOSOME	GO_CONDENSED_CHROMOSOME		151	0.474871	1.93474	0	0.00366387	0.564	1668	tags=35%, list=14%, signal=40%
ZHANG_TLX_TARGETS_DN	ZHANG_TLX_TARGETS_DN		81	0.52605	1.93468	0	0.00364111	0.564	2201	tags=42%, list=19%, signal=51%
FARMER_BREAST_CANCER_CLUSTER_2	FARMER_BREAST_CANCER_CLUSTER_2		30	0.63379	1.93277	0.00189753	0.00376111	0.577	2165	tags=60%, list=19%, signal=74%
KEGG_SYSTEMIC_LUPUS_ERYTHEMATOSUS	KEGG_SYSTEMIC_LUPUS_ERYTHEMATOSUS		91	0.518559	1.93262	0	0.00373804	0.577	1681	tags=40%, list=15%, signal=46%
GO_EUKARYOTIC_TRANSLATION_INITIATION_FACTOR_3_COMPLEX	GO_EUKARYOTIC_TRANSLATION_INITIATION_FACTOR_3_COMPLEX		16	0.729107	1.92854	0	0.00397098	0.605	1531	tags=50%, list=13%, signal=58%
MODULE_244	MODULE_244		166	0.470708	1.92669	0	0.00407432	0.616	2237	tags=36%, list=19%, signal=43%
ODONNELL_TFRC_TARGETS_DN	ODONNELL_TFRC_TARGETS_DN		98	0.506014	1.92465	0	0.00420984	0.632	2267	tags=46%, list=20%, signal=57%
MANALO_HYPOXIA_DN	MANALO_HYPOXIA_DN		259	0.444364	1.92148	0	0.00438554	0.657	2535	tags=39%, list=22%, signal=48%
GO_DNA_REPLICATION_DEPENDENT_NUCLEOSOME_ORGANIZATION	GO_DNA_REPLICATION_DEPENDENT_NUCLEOSOME_ORGANIZATION		29	0.624787	1.92004	0	0.00448418	0.668	1951	tags=52%, list=17%, signal=62%
MORF_FBL	MORF_FBL		133	0.483724	1.91689	0	0.00465208	0.68	2614	tags=43%, list=23%, signal=55%
GO_INTERCELLULAR_BRIDGE	GO_INTERCELLULAR_BRIDGE		35	0.604326	1.91665	0	0.00464941	0.683	1639	tags=34%, list=14%, signal=40%
PID_ATR_PATHWAY	PID_ATR_PATHWAY		34	0.605192	1.91345	0	0.00486726	0.697	2929	tags=56%, list=25%, signal=75%
STEIN_ESRRA_TARGETS_RESPONSIVE_TO_ESTROGEN_DN	STEIN_ESRRA_TARGETS_RESPONSIVE_TO_ESTROGEN_DN		33	0.619576	1.91314	0.0018622	0.00486341	0.699	3004	tags=67%, list=26%, signal=90%
KAECH_DAY8_EFF_VS_DAY15_EFF_CD8_TCELL_UP	KAECH_DAY8_EFF_VS_DAY15_EFF_CD8_TCELL_UP		178	0.460801	1.91219	0	0.00492433	0.706	1652	tags=34%, list=14%, signal=39%
LI_WILMS_TUMOR_ANAPLASTIC_UP	LI_WILMS_TUMOR_ANAPLASTIC_UP		16	0.73155	1.91171	0	0.00492803	0.709	1778	tags=56%, list=15%, signal=66%
GO_CHROMOSOME_SEGREGATION	GO_CHROMOSOME_SEGREGATION		213	0.45155	1.90837	0	0.00516806	0.722	2321	tags=39%, list=20%, signal=48%
GO_FORMATION_OF_TRANSLATION_PREINITIATION_COMPLEX	GO_FORMATION_OF_TRANSLATION_PREINITIATION_COMPLEX		20	0.697845	1.90761	0	0.0052181	0.727	1521	tags=45%, list=13%, signal=52%
GO_NUCLEAR_CHROMOSOME_SEGREGATION	GO_NUCLEAR_CHROMOSOME_SEGREGATION		173	0.460247	1.90705	0	0.00525577	0.734	2288	tags=39%, list=20%, signal=48%
GO_MITOTIC_NUCLEAR_DIVISION	GO_MITOTIC_NUCLEAR_DIVISION		293	0.432327	1.90579	0	0.00535966	0.741	2335	tags=38%, list=20%, signal=46%
MODULE_252	MODULE_252		213	0.447631	1.90553	0	0.005361	0.743	2509	tags=41%, list=22%, signal=51%
MORF_ESPL1	MORF_ESPL1		61	0.544295	1.90374	0	0.00545182	0.749	3321	tags=52%, list=29%, signal=73%
MORF_FEN1	MORF_FEN1		65	0.53579	1.90359	0	0.00543727	0.75	2487	tags=40%, list=21%, signal=51%
GO_SPINDLE_CHECKPOINT	GO_SPINDLE_CHECKPOINT		21	0.679379	1.89998	0.00188324	0.00566887	0.772	1553	tags=48%, list=13%, signal=55%
GO_HISTONE_BINDING	GO_HISTONE_BINDING		147	0.470937	1.89975	0	0.00566467	0.773	1704	tags=26%, list=15%, signal=30%
GO_GLUTAMINE_FAMILY_AMINO_ACID_CATABOLIC_PROCESS	GO_GLUTAMINE_FAMILY_AMINO_ACID_CATABOLIC_PROCESS		15	0.728803	1.89921	0	0.00567203	0.779	83	tags=20%, list=1%, signal=20%
REACTOME_CELL_CYCLE_MITOTIC	REACTOME_CELL_CYCLE_MITOTIC		285	0.433089	1.89838	0	0.00569442	0.783	2885	tags=44%, list=25%, signal=57%
GSE45365_WT_VS_IFNAR_KO_BCELL_MCMV_INFECTION_DN	GSE45365_WT_VS_IFNAR_KO_BCELL_MCMV_INFECTION_DN		118	0.475559	1.89815	0	0.00568254	0.784	2255	tags=39%, list=19%, signal=48%
GO_HISTONE_MRNA_METABOLIC_PROCESS	GO_HISTONE_MRNA_METABOLIC_PROCESS		26	0.644209	1.89775	0	0.00569704	0.785	507	tags=27%, list=4%, signal=28%
GO_CHROMOSOME_CENTROMERIC_REGION	GO_CHROMOSOME_CENTROMERIC_REGION		147	0.464411	1.89737	0	0.00571152	0.787	2535	tags=42%, list=22%, signal=53%
GO_MITOTIC_SISTER_CHROMATID_SEGREGATION	GO_MITOTIC_SISTER_CHROMATID_SEGREGATION		80	0.50749	1.89446	0	0.0059144	0.797	2253	tags=45%, list=19%, signal=55%
WONG_EMBRYONIC_STEM_CELL_CORE	WONG_EMBRYONIC_STEM_CELL_CORE		307	0.430808	1.89267	0	0.00604541	0.808	2994	tags=42%, list=26%, signal=55%
REICHERT_MITOSIS_LIN9_TARGETS	REICHERT_MITOSIS_LIN9_TARGETS		26	0.64547	1.89183	0	0.00607245	0.81	1553	tags=54%, list=13%, signal=62%
WU_APOPTOSIS_BY_CDKN1A_VIA_TP53	WU_APOPTOSIS_BY_CDKN1A_VIA_TP53		50	0.545593	1.89086	0	0.00614989	0.813	2311	tags=50%, list=20%, signal=62%
GSE24634_TEFF_VS_TCONV_DAY5_IN_CULTURE_UP	GSE24634_TEFF_VS_TCONV_DAY5_IN_CULTURE_UP		180	0.455592	1.88829	0	0.00634962	0.822	2190	tags=35%, list=19%, signal=42%
GO_SPLICEOSOMAL_COMPLEX	GO_SPLICEOSOMAL_COMPLEX		154	0.461454	1.8881	0	0.00634569	0.822	2768	tags=44%, list=24%, signal=56%
GO_TELOMERE_MAINTENANCE_VIA_RECOMBINATION	GO_TELOMERE_MAINTENANCE_VIA_RECOMBINATION		29	0.62147	1.88753	0	0.00637066	0.826	2987	tags=59%, list=26%, signal=79%
GO_SPINDLE_POLE	GO_SPINDLE_POLE		97	0.491236	1.88577	0	0.00646689	0.832	3129	tags=48%, list=27%, signal=66%
E2F_01	E2F_01		52	0.553668	1.88518	0.00188679	0.00649435	0.835	1013	tags=35%, list=9%, signal=38%
MOLENAAR_TARGETS_OF_CCND1_AND_CDK4_DN	MOLENAAR_TARGETS_OF_CCND1_AND_CDK4_DN		46	0.565906	1.88366	0.00178891	0.00657108	0.842	1652	tags=39%, list=14%, signal=45%
GAVIN_FOXP3_TARGETS_CLUSTER_P6	GAVIN_FOXP3_TARGETS_CLUSTER_P6		79	0.510092	1.88327	0	0.00656968	0.842	1827	tags=44%, list=16%, signal=52%
E2F1DP1RB_01	E2F1DP1RB_01		172	0.456106	1.88249	0	0.00660679	0.844	1680	tags=28%, list=15%, signal=33%
GO_GENE_SILENCING_BY_RNA	GO_GENE_SILENCING_BY_RNA		108	0.485749	1.88192	0	0.00664342	0.846	1978	tags=36%, list=17%, signal=43%
WINNEPENNINCKX_MELANOMA_METASTASIS_UP	WINNEPENNINCKX_MELANOMA_METASTASIS_UP		140	0.469513	1.87534	0	0.00729974	0.87	1827	tags=32%, list=16%, signal=38%
GSE22886_NAIVE_CD4_TCELL_VS_48H_ACT_TH1_DN	GSE22886_NAIVE_CD4_TCELL_VS_48H_ACT_TH1_DN		188	0.452238	1.87498	0	0.00731193	0.87	1860	tags=31%, list=16%, signal=37%
GO_ORGANELLE_FISSION	GO_ORGANELLE_FISSION		365	0.418	1.87428	0	0.00732756	0.871	2169	tags=34%, list=19%, signal=41%
GSE1460_INTRATHYMIC_T_PROGENITOR_VS_NAIVE_CD4_TCELL_ADULT_BLOOD_UP	GSE1460_INTRATHYMIC_T_PROGENITOR_VS_NAIVE_CD4_TCELL_ADULT_BLOOD_UP		175	0.450597	1.87189	0	0.00756832	0.885	2201	tags=38%, list=19%, signal=46%
MORF_PCNA	MORF_PCNA		82	0.502865	1.87136	0	0.00761304	0.888	2691	tags=48%, list=23%, signal=62%
RHODES_UNDIFFERENTIATED_CANCER	RHODES_UNDIFFERENTIATED_CANCER		63	0.522043	1.8666	0	0.00812082	0.913	2311	tags=49%, list=20%, signal=61%
SHEPARD_BMYB_TARGETS	SHEPARD_BMYB_TARGETS		50	0.547341	1.86627	0	0.00813218	0.915	2230	tags=50%, list=19%, signal=62%
MORI_PRE_BI_LYMPHOCYTE_UP	MORI_PRE_BI_LYMPHOCYTE_UP		66	0.518941	1.86452	0	0.00826404	0.92	1822	tags=39%, list=16%, signal=46%
PID_AURORA_B_PATHWAY	PID_AURORA_B_PATHWAY		32	0.594986	1.86378	0	0.0083146	0.923	2861	tags=59%, list=25%, signal=79%
REACTOME_LAGGING_STRAND_SYNTHESIS	REACTOME_LAGGING_STRAND_SYNTHESIS		19	0.669805	1.86371	0	0.00828853	0.923	2987	tags=68%, list=26%, signal=92%
FUJII_YBX1_TARGETS_DN	FUJII_YBX1_TARGETS_DN		173	0.455906	1.8626	0	0.00837497	0.928	2222	tags=40%, list=19%, signal=49%
REACTOME_ACTIVATION_OF_ATR_IN_RESPONSE_TO_REPLICATION_STRESS	REACTOME_ACTIVATION_OF_ATR_IN_RESPONSE_TO_REPLICATION_STRESS		32	0.591316	1.85859	0.00187266	0.00884119	0.936	2929	tags=59%, list=25%, signal=79%
FEVR_CTNNB1_TARGETS_DN	FEVR_CTNNB1_TARGETS_DN		457	0.402862	1.85705	0	0.00897306	0.94	2457	tags=33%, list=21%, signal=40%
ZHANG_TLX_TARGETS_36HR_DN	ZHANG_TLX_TARGETS_36HR_DN		166	0.451873	1.85646	0	0.00901588	0.94	2201	tags=36%, list=19%, signal=44%
WHITFIELD_CELL_CYCLE_G2	WHITFIELD_CELL_CYCLE_G2		155	0.457456	1.85577	0	0.00906811	0.94	2558	tags=41%, list=22%, signal=51%
MODULE_183	MODULE_183		63	0.523127	1.85564	0	0.00904239	0.94	2482	tags=49%, list=21%, signal=62%
FRASOR_RESPONSE_TO_SERM_OR_FULVESTRANT_DN	FRASOR_RESPONSE_TO_SERM_OR_FULVESTRANT_DN		46	0.559629	1.8551	0.00188679	0.00906508	0.94	2203	tags=43%, list=19%, signal=53%
HALLMARK_MYC_TARGETS_V1	HALLMARK_MYC_TARGETS_V1		194	0.441171	1.8528	0	0.00931686	0.944	2487	tags=38%, list=21%, signal=48%
E2F_Q4	E2F_Q4		182	0.441577	1.85237	0	0.00935078	0.946	1680	tags=28%, list=15%, signal=32%
GO_CENTROMERE_COMPLEX_ASSEMBLY	GO_CENTROMERE_COMPLEX_ASSEMBLY		39	0.576633	1.84901	0	0.00969162	0.951	2079	tags=46%, list=18%, signal=56%
GSE24634_TEFF_VS_TCONV_DAY7_IN_CULTURE_UP	GSE24634_TEFF_VS_TCONV_DAY7_IN_CULTURE_UP		174	0.445875	1.84839	0	0.00971727	0.953	2254	tags=43%, list=19%, signal=52%
ABRAMSON_INTERACT_WITH_AIRE	ABRAMSON_INTERACT_WITH_AIRE		43	0.553603	1.84791	0	0.00974569	0.956	1176	tags=33%, list=10%, signal=36%
GO_SISTER_CHROMATID_COHESION	GO_SISTER_CHROMATID_COHESION		96	0.487057	1.8473	0	0.00977089	0.958	1668	tags=35%, list=14%, signal=41%
BURTON_ADIPOGENESIS_PEAK_AT_16HR	BURTON_ADIPOGENESIS_PEAK_AT_16HR		38	0.581492	1.84521	0	0.0100353	0.96	1260	tags=34%, list=11%, signal=38%
JAZAERI_BREAST_CANCER_BRCA1_VS_BRCA2_UP	JAZAERI_BREAST_CANCER_BRCA1_VS_BRCA2_UP		44	0.5545	1.84438	0	0.0100993	0.961	2671	tags=36%, list=23%, signal=47%
REACTOME_G2_M_CHECKPOINTS	REACTOME_G2_M_CHECKPOINTS		38	0.580567	1.84297	0.00362319	0.0102304	0.962	2929	tags=58%, list=25%, signal=77%
GO_CELL_CYCLE_G2_M_PHASE_TRANSITION	GO_CELL_CYCLE_G2_M_PHASE_TRANSITION		121	0.470498	1.84217	0	0.0103267	0.963	3145	tags=48%, list=27%, signal=65%
GNF2_MSH2	GNF2_MSH2		27	0.6234	1.84173	0.00369004	0.0103456	0.964	2819	tags=70%, list=24%, signal=93%
GO_HELICASE_ACTIVITY	GO_HELICASE_ACTIVITY		136	0.46115	1.84164	0	0.0103098	0.964	2367	tags=40%, list=20%, signal=49%
GO_CHROMOSOME_TELOMERIC_REGION	GO_CHROMOSOME_TELOMERIC_REGION		134	0.457911	1.83906	0	0.0106101	0.97	2150	tags=37%, list=19%, signal=44%
KAUFFMANN_DNA_REPAIR_GENES	KAUFFMANN_DNA_REPAIR_GENES		202	0.432644	1.83591	0	0.0110702	0.976	2311	tags=39%, list=20%, signal=47%
SGCGSSAAA_E2F1DP2_01	SGCGSSAAA_E2F1DP2_01		131	0.46144	1.83305	0	0.0114158	0.979	1303	tags=26%, list=11%, signal=29%
VECCHI_GASTRIC_CANCER_EARLY_UP	VECCHI_GASTRIC_CANCER_EARLY_UP		301	0.414457	1.83203	0	0.0115042	0.979	2254	tags=34%, list=19%, signal=41%
GSE21546_ELK1_KO_VS_SAP1A_KO_AND_ELK1_KO_DP_THYMOCYTES_DN	GSE21546_ELK1_KO_VS_SAP1A_KO_AND_ELK1_KO_DP_THYMOCYTES_DN		155	0.44769	1.83116	0	0.0115773	0.98	3149	tags=47%, list=27%, signal=64%
BOYAULT_LIVER_CANCER_SUBCLASS_G23_UP	BOYAULT_LIVER_CANCER_SUBCLASS_G23_UP		41	0.565564	1.82974	0.00181818	0.0118218	0.981	1139	tags=37%, list=10%, signal=40%
PID_FANCONI_PATHWAY	PID_FANCONI_PATHWAY		38	0.565217	1.82866	0.00187266	0.0119254	0.982	2929	tags=55%, list=25%, signal=74%
E2F_Q6	E2F_Q6		181	0.442012	1.827	0	0.0121514	0.983	1321	tags=25%, list=11%, signal=28%
MACAEVA_PBMC_RESPONSE_TO_IR	MACAEVA_PBMC_RESPONSE_TO_IR		83	0.487396	1.82188	0	0.0129436	0.987	2664	tags=36%, list=23%, signal=47%
GO_NUCLEAR_CHROMOSOME	GO_NUCLEAR_CHROMOSOME		416	0.399396	1.8208	0	0.0130527	0.987	2045	tags=31%, list=18%, signal=36%
GSE21063_CTRL_VS_ANTI_IGM_STIM_BCELL_NFATC1_KO_8H_DN	GSE21063_CTRL_VS_ANTI_IGM_STIM_BCELL_NFATC1_KO_8H_DN		171	0.441552	1.82056	0	0.0130422	0.987	2448	tags=38%, list=21%, signal=47%
GO_U12_TYPE_SPLICEOSOMAL_COMPLEX	GO_U12_TYPE_SPLICEOSOMAL_COMPLEX		24	0.626139	1.82041	0.00189394	0.0130114	0.987	2625	tags=54%, list=23%, signal=70%
REACTOME_PROCESSING_OF_CAPPED_INTRONLESS_PRE_MRNA	REACTOME_PROCESSING_OF_CAPPED_INTRONLESS_PRE_MRNA		20	0.647498	1.82022	0.00187617	0.0129982	0.987	2017	tags=40%, list=17%, signal=48%
GARCIA_TARGETS_OF_FLI1_AND_DAX1_DN	GARCIA_TARGETS_OF_FLI1_AND_DAX1_DN		138	0.45371	1.82006	0	0.0129592	0.987	1946	tags=31%, list=17%, signal=37%
GSE18791_CTRL_VS_NEWCASTLE_VIRUS_DC_12H_UP	GSE18791_CTRL_VS_NEWCASTLE_VIRUS_DC_12H_UP		169	0.438845	1.81889	0	0.0130832	0.988	2650	tags=39%, list=23%, signal=50%
KEGG_MISMATCH_REPAIR	KEGG_MISMATCH_REPAIR		22	0.646266	1.81797	0.00196464	0.0131609	0.988	2821	tags=64%, list=24%, signal=84%
GSE17301_CTRL_VS_48H_ACD3_ACD28_IFNA2_STIM_CD8_TCELL_DN	GSE17301_CTRL_VS_48H_ACD3_ACD28_IFNA2_STIM_CD8_TCELL_DN		142	0.448619	1.81791	0	0.0131303	0.988	2415	tags=37%, list=21%, signal=47%
BENPORATH_PROLIFERATION	BENPORATH_PROLIFERATION		127	0.455061	1.81605	0	0.0134664	0.989	2975	tags=44%, list=26%, signal=59%
GSE13547_2H_VS_12_H_ANTI_IGM_STIM_ZFX_KO_BCELL_DN	GSE13547_2H_VS_12_H_ANTI_IGM_STIM_ZFX_KO_BCELL_DN		142	0.455949	1.81594	0	0.0134349	0.989	1784	tags=33%, list=15%, signal=39%
GO_TRANSLATION_INITIATION_FACTOR_ACTIVITY	GO_TRANSLATION_INITIATION_FACTOR_ACTIVITY		48	0.539161	1.81445	0.00191205	0.0136947	0.99	1531	tags=29%, list=13%, signal=33%
OLSSON_E2F3_TARGETS_DN	OLSSON_E2F3_TARGETS_DN		32	0.591162	1.81284	0.00356506	0.0139553	0.99	1951	tags=56%, list=17%, signal=67%
KEGG_PYRIMIDINE_METABOLISM	KEGG_PYRIMIDINE_METABOLISM		87	0.487007	1.81278	0	0.0139138	0.99	2835	tags=46%, list=24%, signal=60%
GO_SPLICEOSOMAL_SNRNP_ASSEMBLY	GO_SPLICEOSOMAL_SNRNP_ASSEMBLY		33	0.582374	1.80968	0	0.0144334	0.992	2417	tags=42%, list=21%, signal=53%
GSE24634_TREG_VS_TCONV_POST_DAY5_IL4_CONVERSION_UP	GSE24634_TREG_VS_TCONV_POST_DAY5_IL4_CONVERSION_UP		179	0.435454	1.80876	0	0.0145142	0.992	1588	tags=26%, list=14%, signal=29%
GSE18893_TCONV_VS_TREG_24H_TNF_STIM_UP	GSE18893_TCONV_VS_TREG_24H_TNF_STIM_UP		174	0.433506	1.80841	0	0.0145203	0.992	1996	tags=32%, list=17%, signal=38%
GO_PURINE_NTP_DEPENDENT_HELICASE_ACTIVITY	GO_PURINE_NTP_DEPENDENT_HELICASE_ACTIVITY		87	0.479198	1.8083	0	0.0144717	0.992	2900	tags=45%, list=25%, signal=59%
GO_NUCLEOCYTOPLASMIC_TRANSPORTER_ACTIVITY	GO_NUCLEOCYTOPLASMIC_TRANSPORTER_ACTIVITY		22	0.634661	1.80565	0.00728598	0.0149792	0.994	1978	tags=36%, list=17%, signal=44%
SMITH_LIVER_CANCER	SMITH_LIVER_CANCER		37	0.564797	1.80553	0.00364299	0.0149455	0.994	2156	tags=46%, list=19%, signal=56%
GO_DNA_REPLICATION_INDEPENDENT_NUCLEOSOME_ORGANIZATION	GO_DNA_REPLICATION_INDEPENDENT_NUCLEOSOME_ORGANIZATION		44	0.544843	1.80508	0	0.0149689	0.994	2079	tags=43%, list=18%, signal=52%
GSE12845_IGD_POS_BLOOD_VS_PRE_GC_TONSIL_BCELL_DN	GSE12845_IGD_POS_BLOOD_VS_PRE_GC_TONSIL_BCELL_DN		182	0.437405	1.804	0	0.0151024	0.994	1461	tags=27%, list=13%, signal=30%
GO_MRNA_PROCESSING	GO_MRNA_PROCESSING		358	0.402147	1.80121	0	0.0155888	0.995	2794	tags=36%, list=24%, signal=46%
MODULE_388	MODULE_388		15	0.699587	1.80093	0.0037594	0.0155961	0.995	2482	tags=67%, list=21%, signal=85%
E2F1_Q6_01	E2F1_Q6_01		183	0.431212	1.80084	0	0.0155527	0.995	2299	tags=32%, list=20%, signal=40%
GO_RIBONUCLEOPROTEIN_COMPLEX_SUBUNIT_ORGANIZATION	GO_RIBONUCLEOPROTEIN_COMPLEX_SUBUNIT_ORGANIZATION		169	0.439992	1.79926	0	0.0158174	0.995	2625	tags=39%, list=23%, signal=50%
MITSIADES_RESPONSE_TO_APLIDIN_DN	MITSIADES_RESPONSE_TO_APLIDIN_DN		230	0.421859	1.79734	0	0.0161301	0.997	1940	tags=30%, list=17%, signal=35%
GO_TRNA_PROCESSING	GO_TRNA_PROCESSING		100	0.47519	1.79711	0	0.0161141	0.997	2161	tags=34%, list=19%, signal=41%
ZHAN_MULTIPLE_MYELOMA_SUBGROUPS	ZHAN_MULTIPLE_MYELOMA_SUBGROUPS		29	0.596278	1.79645	0	0.0161746	0.997	1559	tags=48%, list=13%, signal=56%
GO_PROTEIN_HETEROOLIGOMERIZATION	GO_PROTEIN_HETEROOLIGOMERIZATION		75	0.489763	1.79604	0	0.0162003	0.997	1951	tags=33%, list=17%, signal=40%
DELPUECH_FOXO3_TARGETS_DN	DELPUECH_FOXO3_TARGETS_DN		36	0.568855	1.79533	0	0.0162909	0.998	1219	tags=33%, list=11%, signal=37%
GSE40274_CTRL_VS_FOXP3_TRANSDUCED_ACTIVATED_CD4_TCELL_UP	GSE40274_CTRL_VS_FOXP3_TRANSDUCED_ACTIVATED_CD4_TCELL_UP		161	0.435378	1.79528	0	0.0162461	0.998	1975	tags=32%, list=17%, signal=38%
CHEN_ETV5_TARGETS_TESTIS	CHEN_ETV5_TARGETS_TESTIS		15	0.692366	1.79506	0.00562852	0.0162686	0.998	1236	tags=33%, list=11%, signal=37%
REACTOME_DNA_REPAIR	REACTOME_DNA_REPAIR		96	0.467639	1.79266	0	0.0166436	0.998	2295	tags=42%, list=20%, signal=52%
GSE21670_UNTREATED_VS_TGFB_IL6_TREATED_CD4_TCELL_UP	GSE21670_UNTREATED_VS_TGFB_IL6_TREATED_CD4_TCELL_UP		154	0.434257	1.78996	0	0.017177	0.998	2258	tags=32%, list=20%, signal=39%
REACTOME_MITOTIC_M_M_G1_PHASES	REACTOME_MITOTIC_M_M_G1_PHASES		157	0.437462	1.78771	0	0.0175842	0.998	2821	tags=45%, list=24%, signal=58%
GO_PROTEIN_TETRAMERIZATION	GO_PROTEIN_TETRAMERIZATION		93	0.474556	1.78725	0	0.0176219	0.998	1961	tags=37%, list=17%, signal=44%
GSE36476_CTRL_VS_TSST_ACT_40H_MEMORY_CD4_TCELL_OLD_DN	GSE36476_CTRL_VS_TSST_ACT_40H_MEMORY_CD4_TCELL_OLD_DN		187	0.42265	1.78414	0	0.0182398	0.998	2180	tags=37%, list=19%, signal=45%
MODULE_198	MODULE_198		269	0.412802	1.78288	0	0.0184063	0.998	2509	tags=39%, list=22%, signal=49%
GSE45365_HEALTHY_VS_MCMV_INFECTION_CD11B_DC_IFNAR_KO_DN	GSE45365_HEALTHY_VS_MCMV_INFECTION_CD11B_DC_IFNAR_KO_DN		99	0.472271	1.7816	0	0.0186646	0.999	2253	tags=34%, list=19%, signal=42%
BIOCARTA_MCM_PATHWAY	BIOCARTA_MCM_PATHWAY		17	0.676639	1.7808	0.00191571	0.018773	0.999	2150	tags=65%, list=19%, signal=79%
GO_CELL_DIVISION	GO_CELL_DIVISION		360	0.401729	1.78037	0	0.0188234	0.999	2336	tags=36%, list=20%, signal=43%
GNF2_RAN	GNF2_RAN		82	0.475873	1.7803	0	0.0187712	0.999	2487	tags=44%, list=21%, signal=56%
GO_NEGATIVE_REGULATION_OF_MITOTIC_NUCLEAR_DIVISION	GO_NEGATIVE_REGULATION_OF_MITOTIC_NUCLEAR_DIVISION		29	0.593739	1.78016	0.00575816	0.0187468	0.999	1553	tags=38%, list=13%, signal=44%
MORF_UNG	MORF_UNG		75	0.492964	1.77972	0	0.0187917	0.999	2852	tags=44%, list=25%, signal=58%
GO_NEGATIVE_REGULATION_OF_CELLULAR_PROTEIN_CATABOLIC_PROCESS	GO_NEGATIVE_REGULATION_OF_CELLULAR_PROTEIN_CATABOLIC_PROCESS		46	0.537026	1.77956	0	0.0187673	0.999	2801	tags=50%, list=24%, signal=66%
LINDGREN_BLADDER_CANCER_CLUSTER_3_UP	LINDGREN_BLADDER_CANCER_CLUSTER_3_UP		278	0.407558	1.77675	0	0.0193567	0.999	1859	tags=29%, list=16%, signal=34%
GO_NEGATIVE_REGULATION_OF_NUCLEAR_DIVISION	GO_NEGATIVE_REGULATION_OF_NUCLEAR_DIVISION		38	0.554765	1.77584	0.00382409	0.0195139	0.999	1553	tags=34%, list=13%, signal=39%
GSE7764_IL15_TREATED_VS_CTRL_NK_CELL_24H_UP	GSE7764_IL15_TREATED_VS_CTRL_NK_CELL_24H_UP		170	0.432535	1.77428	0	0.0197944	0.999	2627	tags=40%, list=23%, signal=51%
REACTOME_PROCESSIVE_SYNTHESIS_ON_THE_LAGGING_STRAND	REACTOME_PROCESSIVE_SYNTHESIS_ON_THE_LAGGING_STRAND		15	0.681356	1.77404	0.011194	0.0197862	0.999	2987	tags=73%, list=26%, signal=99%
GO_CELL_CYCLE_CHECKPOINT	GO_CELL_CYCLE_CHECKPOINT		158	0.433806	1.77344	0	0.0197881	0.999	2650	tags=40%, list=23%, signal=51%
GO_HISTONE_EXCHANGE	GO_HISTONE_EXCHANGE		39	0.558828	1.77057	0.00185185	0.0203999	1	2079	tags=44%, list=18%, signal=53%
E2F1_Q3	E2F1_Q3		184	0.417563	1.76798	0	0.0209809	1	1389	tags=23%, list=12%, signal=26%
MORF_TNFRSF6	MORF_TNFRSF6		68	0.502978	1.76647	0	0.021249	1	2113	tags=28%, list=18%, signal=34%
GO_NUCLEAR_CHROMOSOME_TELOMERIC_REGION	GO_NUCLEAR_CHROMOSOME_TELOMERIC_REGION		111	0.458212	1.76569	0	0.0214034	1	2295	tags=40%, list=20%, signal=49%
GO_RNA_SPLICING	GO_RNA_SPLICING		316	0.400221	1.76493	0	0.0215186	1	2794	tags=37%, list=24%, signal=47%
REACTOME_TRANSCRIPTION_COUPLED_NER_TC_NER	REACTOME_TRANSCRIPTION_COUPLED_NER_TC_NER		43	0.528758	1.76157	0.00187266	0.0223371	1	2295	tags=47%, list=20%, signal=58%
REACTOME_MICRORNA_MIRNA_BIOGENESIS	REACTOME_MICRORNA_MIRNA_BIOGENESIS		18	0.662602	1.76083	0	0.0224462	1	1014	tags=44%, list=9%, signal=49%
E2F_Q6_01	E2F_Q6_01		180	0.41803	1.76015	0	0.0225402	1	1450	tags=23%, list=13%, signal=26%
GO_MITOTIC_CYTOKINESIS	GO_MITOTIC_CYTOKINESIS		25	0.603104	1.75957	0.00724638	0.0226006	1	2089	tags=48%, list=18%, signal=58%
GO_DNA_REPLICATION_INITIATION	GO_DNA_REPLICATION_INITIATION		27	0.582543	1.75888	0.00754717	0.02274	1	3904	tags=74%, list=34%, signal=111%
REACTOME_MRNA_SPLICING_MINOR_PATHWAY	REACTOME_MRNA_SPLICING_MINOR_PATHWAY		38	0.550223	1.75819	0.00385357	0.022872	1	1014	tags=26%, list=9%, signal=29%
GO_EXON_EXON_JUNCTION_COMPLEX	GO_EXON_EXON_JUNCTION_COMPLEX		18	0.65324	1.75759	0.00376648	0.0230005	1	2353	tags=50%, list=20%, signal=63%
GSE39110_DAY3_VS_DAY6_POST_IMMUNIZATION_CD8_TCELL_DN	GSE39110_DAY3_VS_DAY6_POST_IMMUNIZATION_CD8_TCELL_DN		163	0.424855	1.7558	0	0.0234478	1	2253	tags=36%, list=19%, signal=44%
KEGG_RNA_POLYMERASE	KEGG_RNA_POLYMERASE		29	0.577225	1.75514	0.00189394	0.0235273	1	2685	tags=55%, list=23%, signal=72%
GO_ATP_DEPENDENT_CHROMATIN_REMODELING	GO_ATP_DEPENDENT_CHROMATIN_REMODELING		58	0.506724	1.75497	0.0034965	0.0234867	1	2079	tags=40%, list=18%, signal=48%
GO_DNA_SYNTHESIS_INVOLVED_IN_DNA_REPAIR	GO_DNA_SYNTHESIS_INVOLVED_IN_DNA_REPAIR		61	0.502757	1.75396	0.0037594	0.0236826	1	2203	tags=46%, list=19%, signal=56%
ROZANOV_MMP14_TARGETS_DN	ROZANOV_MMP14_TARGETS_DN		20	0.629455	1.75325	0.00548446	0.0238474	1	1995	tags=35%, list=17%, signal=42%
E2F1_Q4_01	E2F1_Q4_01		180	0.425869	1.75249	0	0.0239723	1	2454	tags=36%, list=21%, signal=44%
GO_CHROMATIN	GO_CHROMATIN		350	0.39401	1.75243	0	0.0239081	1	1681	tags=26%, list=15%, signal=30%
MORF_SMC1L1	MORF_SMC1L1		61	0.498145	1.75175	0	0.0240186	1	1718	tags=36%, list=15%, signal=42%
GO_DNA_RECOMBINATION	GO_DNA_RECOMBINATION		164	0.430485	1.75168	0	0.023957	1	2311	tags=40%, list=20%, signal=49%
MODULE_57	MODULE_57		53	0.509886	1.75018	0.0035461	0.0243255	1	2448	tags=51%, list=21%, signal=64%
MOREAUX_B_LYMPHOCYTE_MATURATION_BY_TACI_DN	MOREAUX_B_LYMPHOCYTE_MATURATION_BY_TACI_DN		63	0.501585	1.74437	0.00181159	0.0259086	1	1894	tags=38%, list=16%, signal=45%
GO_NUCLEAR_PORE	GO_NUCLEAR_PORE		67	0.492445	1.74362	0.00189394	0.026065	1	3318	tags=48%, list=29%, signal=67%
GO_DNA_HELICASE_ACTIVITY	GO_DNA_HELICASE_ACTIVITY		50	0.514447	1.74269	0	0.0262806	1	2237	tags=46%, list=19%, signal=57%
MORF_BUB3	MORF_BUB3		264	0.401028	1.74252	0	0.0262526	1	2487	tags=36%, list=21%, signal=44%
BROWNE_HCMV_INFECTION_8HR_DN	BROWNE_HCMV_INFECTION_8HR_DN		33	0.550916	1.74216	0	0.026278	1	1863	tags=36%, list=16%, signal=43%
GO_TRNA_MODIFICATION	GO_TRNA_MODIFICATION		50	0.505353	1.73732	0.00183486	0.0278126	1	2161	tags=36%, list=19%, signal=44%
GO_CATALYTIC_STEP_2_SPLICEOSOME	GO_CATALYTIC_STEP_2_SPLICEOSOME		81	0.4717	1.73561	0.00548446	0.0282616	1	2732	tags=46%, list=24%, signal=59%
GSE15930_NAIVE_VS_48H_IN_VITRO_STIM_CD8_TCELL_DN	GSE15930_NAIVE_VS_48H_IN_VITRO_STIM_CD8_TCELL_DN		187	0.415886	1.73382	0	0.0287557	1	1576	tags=26%, list=14%, signal=29%
KEGG_HOMOLOGOUS_RECOMBINATION	KEGG_HOMOLOGOUS_RECOMBINATION		25	0.594803	1.73372	0.00571429	0.0287074	1	2197	tags=52%, list=19%, signal=64%
GCM_CBFB	GCM_CBFB		67	0.478343	1.73369	0.00184843	0.0286267	1	2732	tags=42%, list=24%, signal=54%
GCM_SMO	GCM_SMO		46	0.517189	1.73203	0.00362319	0.0290676	1	1614	tags=33%, list=14%, signal=38%
GSE17974_CTRL_VS_ACT_IL4_AND_ANTI_IL12_48H_CD4_TCELL_DN	GSE17974_CTRL_VS_ACT_IL4_AND_ANTI_IL12_48H_CD4_TCELL_DN		175	0.420186	1.73185	0.00172414	0.0290514	1	1774	tags=30%, list=15%, signal=35%
GO_DNA_DEPENDENT_DNA_REPLICATION	GO_DNA_DEPENDENT_DNA_REPLICATION		84	0.463935	1.73124	0.0017301	0.0291773	1	2180	tags=37%, list=19%, signal=45%
GO_MEMBRANE_DISASSEMBLY	GO_MEMBRANE_DISASSEMBLY		42	0.527858	1.73093	0.00369686	0.0292017	1	1978	tags=38%, list=17%, signal=46%
GO_RNA_HELICASE_ACTIVITY	GO_RNA_HELICASE_ACTIVITY		60	0.501917	1.73048	0	0.0293008	1	2900	tags=45%, list=25%, signal=60%
REACTOME_ACTIVATION_OF_THE_PRE_REPLICATIVE_COMPLEX	REACTOME_ACTIVATION_OF_THE_PRE_REPLICATIVE_COMPLEX		28	0.58041	1.72969	0.00534759	0.0294657	1	2987	tags=64%, list=26%, signal=86%
GO_MITOTIC_CELL_CYCLE_CHECKPOINT	GO_MITOTIC_CELL_CYCLE_CHECKPOINT		114	0.44638	1.72921	0	0.0295358	1	2650	tags=42%, list=23%, signal=54%
GSE40274_FOXP3_VS_FOXP3_AND_EOS_TRANSDUCED_ACTIVATED_CD4_TCELL_DN	GSE40274_FOXP3_VS_FOXP3_AND_EOS_TRANSDUCED_ACTIVATED_CD4_TCELL_DN		148	0.424701	1.72921	0	0.0294481	1	3273	tags=46%, list=28%, signal=63%
GSE22886_UNSTIM_VS_IL15_STIM_NKCELL_DN	GSE22886_UNSTIM_VS_IL15_STIM_NKCELL_DN		186	0.411681	1.72868	0	0.0295095	1	1274	tags=26%, list=11%, signal=29%
GSE13547_WT_VS_ZFX_KO_BCELL_ANTI_IGM_STIM_2H_UP	GSE13547_WT_VS_ZFX_KO_BCELL_ANTI_IGM_STIM_2H_UP		156	0.419399	1.72822	0	0.0295874	1	1943	tags=31%, list=17%, signal=37%
GSE7852_LN_VS_THYMUS_TCONV_DN	GSE7852_LN_VS_THYMUS_TCONV_DN		158	0.425518	1.72759	0	0.0297216	1	1668	tags=28%, list=14%, signal=33%
MORF_BUB1B	MORF_BUB1B		62	0.488755	1.72745	0.00185185	0.0296932	1	2262	tags=40%, list=20%, signal=50%
MORI_MATURE_B_LYMPHOCYTE_DN	MORI_MATURE_B_LYMPHOCYTE_DN		66	0.487539	1.72663	0.00367647	0.0298118	1	2028	tags=39%, list=18%, signal=47%
GSE33292_WT_VS_TCF1_KO_DN3_THYMOCYTE_DN	GSE33292_WT_VS_TCF1_KO_DN3_THYMOCYTE_DN		180	0.416197	1.72533	0	0.0301593	1	2190	tags=34%, list=19%, signal=41%
SLEBOS_HEAD_AND_NECK_CANCER_WITH_HPV_UP	SLEBOS_HEAD_AND_NECK_CANCER_WITH_HPV_UP		65	0.480996	1.72188	0.0018797	0.0312034	1	2523	tags=40%, list=22%, signal=51%
GCM_DENR	GCM_DENR		45	0.52219	1.72133	0.00180505	0.0313224	1	1091	tags=27%, list=9%, signal=29%
LI_WILMS_TUMOR_VS_FETAL_KIDNEY_2_UP	LI_WILMS_TUMOR_VS_FETAL_KIDNEY_2_UP		17	0.64584	1.72109	0.00938086	0.031298	1	1894	tags=53%, list=16%, signal=63%
GSE23568_CTRL_VS_ID3_TRANSDUCED_CD8_TCELL_DN	GSE23568_CTRL_VS_ID3_TRANSDUCED_CD8_TCELL_DN		168	0.418262	1.7195	0	0.0317274	1	2264	tags=36%, list=20%, signal=44%
GSE3982_DC_VS_TH2_DN	GSE3982_DC_VS_TH2_DN		162	0.42036	1.71909	0	0.0317985	1	2177	tags=38%, list=19%, signal=46%
GO_CHROMATIN_ORGANIZATION	GO_CHROMATIN_ORGANIZATION		496	0.370565	1.71869	0	0.0318242	1	2542	tags=31%, list=22%, signal=38%
GSE19941_LPS_VS_LPS_AND_IL10_STIM_IL10_KO_MACROPHAGE_UP	GSE19941_LPS_VS_LPS_AND_IL10_STIM_IL10_KO_MACROPHAGE_UP		155	0.420465	1.71765	0	0.0321137	1	2495	tags=36%, list=22%, signal=45%
E2F1_Q6	E2F1_Q6		181	0.413284	1.71729	0	0.0321279	1	1321	tags=23%, list=11%, signal=26%
SCIBETTA_KDM5B_TARGETS_DN	SCIBETTA_KDM5B_TARGETS_DN		63	0.481419	1.71726	0	0.0320427	1	2359	tags=41%, list=20%, signal=52%
REACTOME_NUCLEOTIDE_EXCISION_REPAIR	REACTOME_NUCLEOTIDE_EXCISION_REPAIR		48	0.508611	1.71587	0.00359066	0.0324749	1	2295	tags=46%, list=20%, signal=57%
GSE21063_WT_VS_NFATC1_KO_8H_ANTI_IGM_STIM_BCELL_UP	GSE21063_WT_VS_NFATC1_KO_8H_ANTI_IGM_STIM_BCELL_UP		181	0.409823	1.71414	0	0.0329855	1	2475	tags=36%, list=21%, signal=46%
PID_AURORA_A_PATHWAY	PID_AURORA_A_PATHWAY		28	0.577016	1.71299	0.00185529	0.0333197	1	1663	tags=46%, list=14%, signal=54%
E2F_Q3_01	E2F_Q3_01		183	0.410795	1.71293	0	0.033246	1	2454	tags=33%, list=21%, signal=41%
MODULE_403	MODULE_403		40	0.537688	1.71191	0.00184162	0.0335235	1	2299	tags=48%, list=20%, signal=59%
GO_TRANSCRIPTION_COUPLED_NUCLEOTIDE_EXCISION_REPAIR	GO_TRANSCRIPTION_COUPLED_NUCLEOTIDE_EXCISION_REPAIR		70	0.480641	1.71179	0.0036036	0.0334638	1	2385	tags=46%, list=21%, signal=57%
GO_CYTOSKELETON_DEPENDENT_CYTOKINESIS	GO_CYTOSKELETON_DEPENDENT_CYTOKINESIS		31	0.549685	1.71174	0.00566038	0.0333863	1	2089	tags=42%, list=18%, signal=51%
CSR_LATE_UP.V1_UP	CSR_LATE_UP.V1_UP		123	0.435518	1.711	0	0.0335617	1	2552	tags=36%, list=22%, signal=45%
GO_MEIOTIC_CELL_CYCLE	GO_MEIOTIC_CELL_CYCLE		111	0.437307	1.71017	0	0.0337696	1	3045	tags=47%, list=26%, signal=63%
GO_MONOCARBOXYLIC_ACID_TRANSMEMBRANE_TRANSPORTER_ACTIVITY	GO_MONOCARBOXYLIC_ACID_TRANSMEMBRANE_TRANSPORTER_ACTIVITY		18	0.645138	1.70947	0.00729927	0.0339312	1	920	tags=28%, list=8%, signal=30%
GSE25088_WT_VS_STAT6_KO_MACROPHAGE_IL4_STIM_DN	GSE25088_WT_VS_STAT6_KO_MACROPHAGE_IL4_STIM_DN		152	0.417655	1.70913	0	0.0339578	1	2182	tags=36%, list=19%, signal=44%
MUELLER_PLURINET	MUELLER_PLURINET		264	0.392253	1.70878	0	0.0340038	1	2953	tags=40%, list=26%, signal=53%
GO_MEIOTIC_CELL_CYCLE_PROCESS	GO_MEIOTIC_CELL_CYCLE_PROCESS		87	0.456917	1.70742	0	0.0344351	1	3045	tags=49%, list=26%, signal=67%
GSE21927_SPLEEN_C57BL6_VS_EL4_TUMOR_BALBC_MONOCYTES_DN	GSE21927_SPLEEN_C57BL6_VS_EL4_TUMOR_BALBC_MONOCYTES_DN		184	0.407431	1.70675	0	0.034595	1	2910	tags=35%, list=25%, signal=46%
YAATNANRNNNCAG_UNKNOWN	YAATNANRNNNCAG_UNKNOWN		37	0.539898	1.7054	0.0094697	0.0349954	1	300	tags=16%, list=3%, signal=17%
ACEVEDO_LIVER_CANCER_WITH_H3K27ME3_DN	ACEVEDO_LIVER_CANCER_WITH_H3K27ME3_DN		100	0.44624	1.70505	0.00180505	0.0350418	1	1376	tags=25%, list=12%, signal=28%
GO_REGULATION_OF_CELL_DIVISION	GO_REGULATION_OF_CELL_DIVISION		179	0.4123	1.70481	0	0.0350262	1	2253	tags=35%, list=19%, signal=43%
GSE25088_WT_VS_STAT6_KO_MACROPHAGE_DN	GSE25088_WT_VS_STAT6_KO_MACROPHAGE_DN		143	0.425492	1.70455	0	0.0350261	1	1939	tags=35%, list=17%, signal=41%
LE_NEURONAL_DIFFERENTIATION_DN	LE_NEURONAL_DIFFERENTIATION_DN		17	0.630283	1.70421	0.0145455	0.0350683	1	1535	tags=41%, list=13%, signal=47%
E2F1DP1_01	E2F1DP1_01		178	0.409425	1.70368	0	0.0351812	1	1321	tags=22%, list=11%, signal=25%
GSE2405_S_AUREUS_VS_UNTREATED_NEUTROPHIL_DN	GSE2405_S_AUREUS_VS_UNTREATED_NEUTROPHIL_DN		148	0.419649	1.70364	0	0.0350944	1	2302	tags=38%, list=20%, signal=47%
REACTOME_REGULATORY_RNA_PATHWAYS	REACTOME_REGULATORY_RNA_PATHWAYS		20	0.624136	1.70289	0.00403226	0.0352813	1	1014	tags=40%, list=9%, signal=44%
GSE33292_DN3_THYMOCYTE_VS_TCELL_LYMPHOMA_FROM_TCF1_KO_DN	GSE33292_DN3_THYMOCYTE_VS_TCELL_LYMPHOMA_FROM_TCF1_KO_DN		132	0.42781	1.70189	0	0.0355795	1	2233	tags=30%, list=19%, signal=37%
GCM_PPP1CC	GCM_PPP1CC		53	0.49875	1.70169	0.00377358	0.0355742	1	1779	tags=34%, list=15%, signal=40%
E2F4DP2_01	E2F4DP2_01		178	0.409425	1.69881	0	0.0365066	1	1321	tags=22%, list=11%, signal=25%
STEIN_ESR1_TARGETS	STEIN_ESR1_TARGETS		58	0.480416	1.69846	0	0.036546	1	2749	tags=50%, list=24%, signal=65%
GO_GLUTAMATE_METABOLIC_PROCESS	GO_GLUTAMATE_METABOLIC_PROCESS		15	0.661767	1.69796	0.00938086	0.0366154	1	914	tags=33%, list=8%, signal=36%
E2F4DP1_01	E2F4DP1_01		178	0.410993	1.69769	0	0.0366146	1	1657	tags=25%, list=14%, signal=29%
E2F1DP2_01	E2F1DP2_01		178	0.409425	1.69741	0	0.0366289	1	1321	tags=22%, list=11%, signal=25%
GO_EXONUCLEASE_ACTIVITY	GO_EXONUCLEASE_ACTIVITY		63	0.483136	1.69643	0.00375234	0.0368997	1	2940	tags=41%, list=25%, signal=55%
MODULE_451	MODULE_451		26	0.57518	1.69481	0.00380952	0.0374146	1	2067	tags=46%, list=18%, signal=56%
GCM_CASP2	GCM_CASP2		23	0.5961	1.6948	0.00544465	0.0373151	1	1152	tags=30%, list=10%, signal=34%
REACTOME_NEP_NS2_INTERACTS_WITH_THE_CELLULAR_EXPORT_MACHINERY	REACTOME_NEP_NS2_INTERACTS_WITH_THE_CELLULAR_EXPORT_MACHINERY		25	0.583244	1.69412	0.00722022	0.037437	1	3029	tags=48%, list=26%, signal=65%
GO_GLUTAMINE_FAMILY_AMINO_ACID_METABOLIC_PROCESS	GO_GLUTAMINE_FAMILY_AMINO_ACID_METABOLIC_PROCESS		40	0.529072	1.69143	0.00381679	0.038452	1	1828	tags=35%, list=16%, signal=41%
REACTOME_APC_CDC20_MEDIATED_DEGRADATION_OF_NEK2A	REACTOME_APC_CDC20_MEDIATED_DEGRADATION_OF_NEK2A		18	0.633705	1.69084	0.0116054	0.0385959	1	2335	tags=56%, list=20%, signal=69%
LEE_METASTASIS_AND_RNA_PROCESSING_UP	LEE_METASTASIS_AND_RNA_PROCESSING_UP		17	0.627743	1.68994	0.00580271	0.03887	1	354	tags=24%, list=3%, signal=24%
RB_DN.V1_UP	RB_DN.V1_UP		102	0.444612	1.68979	0.00176367	0.0388322	1	1926	tags=32%, list=17%, signal=38%
REACTOME_ABORTIVE_ELONGATION_OF_HIV1_TRANSCRIPT_IN_THE_ABSENCE_OF_TAT	REACTOME_ABORTIVE_ELONGATION_OF_HIV1_TRANSCRIPT_IN_THE_ABSENCE_OF_TAT		19	0.61144	1.68957	0.0166976	0.0388222	1	2766	tags=58%, list=24%, signal=76%
GNF2_APEX1	GNF2_APEX1		90	0.449248	1.68946	0	0.0387555	1	2691	tags=38%, list=23%, signal=49%
GO_DNA_DIRECTED_RNA_POLYMERASE_II_CORE_COMPLEX	GO_DNA_DIRECTED_RNA_POLYMERASE_II_CORE_COMPLEX		15	0.650317	1.68904	0.00954198	0.0388111	1	1014	tags=40%, list=9%, signal=44%
GSE37301_HEMATOPOIETIC_STEM_CELL_VS_PRO_BCELL_DN	GSE37301_HEMATOPOIETIC_STEM_CELL_VS_PRO_BCELL_DN		128	0.425796	1.68719	0	0.03949	1	2914	tags=38%, list=25%, signal=50%
E2F_02	E2F_02		179	0.408024	1.68709	0	0.0394512	1	1321	tags=22%, list=11%, signal=25%
E2F_Q4_01	E2F_Q4_01		187	0.40629	1.68661	0	0.0395515	1	1684	tags=25%, list=15%, signal=28%
GO_TELOMERE_MAINTENANCE_VIA_TELOMERE_LENGTHENING	GO_TELOMERE_MAINTENANCE_VIA_TELOMERE_LENGTHENING		22	0.585173	1.68538	0.0197628	0.0398963	1	2853	tags=64%, list=25%, signal=84%
KEGG_CELL_CYCLE	KEGG_CELL_CYCLE		110	0.437294	1.68514	0	0.0399141	1	2525	tags=43%, list=22%, signal=54%
GSE32986_UNSTIM_VS_CURDLAN_HIGHDOSE_STIM_DC_UP	GSE32986_UNSTIM_VS_CURDLAN_HIGHDOSE_STIM_DC_UP		176	0.405725	1.68387	0	0.0402785	1	2171	tags=31%, list=19%, signal=37%
MODULE_158	MODULE_158		41	0.521893	1.68351	0.00183486	0.0403399	1	2787	tags=56%, list=24%, signal=74%
GO_REGULATION_OF_NUCLEAR_DIVISION	GO_REGULATION_OF_NUCLEAR_DIVISION		117	0.427878	1.68318	0	0.0403851	1	2253	tags=38%, list=19%, signal=47%
LI_DCP2_BOUND_MRNA	LI_DCP2_BOUND_MRNA		84	0.454254	1.68238	0	0.0405922	1	1252	tags=23%, list=11%, signal=25%
GSE5679_CTRL_VS_PPARG_LIGAND_ROSIGLITAZONE_TREATED_DC_UP	GSE5679_CTRL_VS_PPARG_LIGAND_ROSIGLITAZONE_TREATED_DC_UP		176	0.40697	1.68186	0	0.0406863	1	2336	tags=38%, list=20%, signal=46%
GO_DNA_REPAIR	GO_DNA_REPAIR		394	0.370606	1.68183	0	0.0405939	1	2478	tags=35%, list=21%, signal=42%
GSE36476_YOUNG_VS_OLD_DONOR_MEMORY_CD4_TCELL_72H_TSST_ACT_UP	GSE36476_YOUNG_VS_OLD_DONOR_MEMORY_CD4_TCELL_72H_TSST_ACT_UP		93	0.443962	1.68109	0.00177305	0.0407919	1	2632	tags=41%, list=23%, signal=52%
WHITFIELD_CELL_CYCLE_G1_S	WHITFIELD_CELL_CYCLE_G1_S		112	0.430533	1.67995	0	0.0411947	1	2706	tags=39%, list=23%, signal=51%
GO_TRNA_METABOLIC_PROCESS	GO_TRNA_METABOLIC_PROCESS		157	0.409376	1.67961	0	0.0412546	1	2161	tags=30%, list=19%, signal=36%
GO_REGULATION_OF_GENE_EXPRESSION_EPIGENETIC	GO_REGULATION_OF_GENE_EXPRESSION_EPIGENETIC		175	0.406129	1.67953	0	0.0411934	1	1951	tags=31%, list=17%, signal=37%
GSE25085_FETAL_LIVER_VS_ADULT_BM_SP4_THYMIC_IMPLANT_DN	GSE25085_FETAL_LIVER_VS_ADULT_BM_SP4_THYMIC_IMPLANT_DN		168	0.405923	1.67932	0	0.0411657	1	3145	tags=40%, list=27%, signal=54%
GSE27241_WT_VS_RORGT_KO_TH17_POLARIZED_CD4_TCELL_UP	GSE27241_WT_VS_RORGT_KO_TH17_POLARIZED_CD4_TCELL_UP		125	0.421568	1.67826	0	0.0415496	1	2203	tags=38%, list=19%, signal=46%
GO_METAPHASE_PLATE_CONGRESSION	GO_METAPHASE_PLATE_CONGRESSION		38	0.51695	1.67805	0.0093633	0.0415333	1	1906	tags=42%, list=16%, signal=50%
REACTOME_METABOLISM_OF_NON_CODING_RNA	REACTOME_METABOLISM_OF_NON_CODING_RNA		44	0.509986	1.67733	0.0108303	0.0417741	1	2141	tags=32%, list=18%, signal=39%
GO_POSITIVE_REGULATION_OF_GENE_EXPRESSION_EPIGENETIC	GO_POSITIVE_REGULATION_OF_GENE_EXPRESSION_EPIGENETIC		70	0.466116	1.67723	0.00178891	0.0417174	1	1951	tags=34%, list=17%, signal=41%
GSE24574_BCL6_HIGH_VS_LOW_TFH_CD4_TCELL_DN	GSE24574_BCL6_HIGH_VS_LOW_TFH_CD4_TCELL_DN		188	0.40222	1.67685	0	0.0417679	1	2111	tags=34%, list=18%, signal=41%
GNF2_HAT1	GNF2_HAT1		48	0.51	1.67665	0.00543478	0.0417632	1	2819	tags=58%, list=24%, signal=77%
CHR7P13	CHR7P13		28	0.563635	1.67462	0.00530974	0.0425594	1	1286	tags=29%, list=11%, signal=32%
REACTOME_PI3K_AKT_ACTIVATION	REACTOME_PI3K_AKT_ACTIVATION		29	0.562231	1.67342	0.00185874	0.0429569	1	1119	tags=24%, list=10%, signal=27%
GO_MITOTIC_SPINDLE_ORGANIZATION	GO_MITOTIC_SPINDLE_ORGANIZATION		54	0.482538	1.67336	0.00389864	0.0428827	1	2177	tags=41%, list=19%, signal=50%
REACTOME_PIP3_ACTIVATES_AKT_SIGNALING	REACTOME_PIP3_ACTIVATES_AKT_SIGNALING		23	0.593751	1.67064	0.00587084	0.0440097	1	1119	tags=26%, list=10%, signal=29%
NFY_Q6	NFY_Q6		168	0.406501	1.66914	0	0.0445593	1	3172	tags=46%, list=27%, signal=62%
GSE15271_CXCR4_POS_VS_NEG_GC_BCELL_UP	GSE15271_CXCR4_POS_VS_NEG_GC_BCELL_UP		153	0.408706	1.6689	0	0.0445565	1	2668	tags=36%, list=23%, signal=46%
REACTOME_TRANSPORT_OF_RIBONUCLEOPROTEINS_INTO_THE_HOST_NUCLEUS	REACTOME_TRANSPORT_OF_RIBONUCLEOPROTEINS_INTO_THE_HOST_NUCLEUS		25	0.568619	1.66803	0.0114504	0.0448432	1	3029	tags=44%, list=26%, signal=59%
MODULE_98	MODULE_98		343	0.374796	1.66786	0	0.0448278	1	2482	tags=36%, list=21%, signal=45%
GO_DNA_GEOMETRIC_CHANGE	GO_DNA_GEOMETRIC_CHANGE		77	0.456381	1.66658	0	0.0453315	1	2311	tags=40%, list=20%, signal=50%
GSE17301_ACD3_ACD28_VS_ACD3_ACD28_AND_IFNA5_STIM_CD8_TCELL_UP	GSE17301_ACD3_ACD28_VS_ACD3_ACD28_AND_IFNA5_STIM_CD8_TCELL_UP		138	0.413369	1.66577	0	0.0455977	1	2559	tags=42%, list=22%, signal=53%
GO_ORGAN_OR_TISSUE_SPECIFIC_IMMUNE_RESPONSE	GO_ORGAN_OR_TISSUE_SPECIFIC_IMMUNE_RESPONSE		15	0.627535	1.66363	0.0110701	0.0465228	1	170	tags=20%, list=1%, signal=20%
GO_REGULATION_OF_SIGNAL_TRANSDUCTION_BY_P53_CLASS_MEDIATOR	GO_REGULATION_OF_SIGNAL_TRANSDUCTION_BY_P53_CLASS_MEDIATOR		136	0.415398	1.66331	0.00181818	0.0465738	1	2732	tags=42%, list=24%, signal=54%
BIOCARTA_AKT_PATHWAY	BIOCARTA_AKT_PATHWAY		20	0.59386	1.66303	0.0150659	0.0466096	1	1119	tags=25%, list=10%, signal=28%
GO_CHROMOSOME_LOCALIZATION	GO_CHROMOSOME_LOCALIZATION		50	0.487574	1.6628	0.00390625	0.0466101	1	1906	tags=38%, list=16%, signal=45%
GSE19941_UNSTIM_VS_LPS_STIM_IL10_KO_NFKBP50_KO_MACROPHAGE_UP	GSE19941_UNSTIM_VS_LPS_STIM_IL10_KO_NFKBP50_KO_MACROPHAGE_UP		151	0.409456	1.6622	0	0.0468301	1	2226	tags=31%, list=19%, signal=38%
GSE22886_UNSTIM_VS_IL2_STIM_NKCELL_DN	GSE22886_UNSTIM_VS_IL2_STIM_NKCELL_DN		185	0.398894	1.66195	0	0.0468485	1	1821	tags=31%, list=16%, signal=36%
MORF_SNRP70	MORF_SNRP70		59	0.472399	1.66063	0.00381679	0.047295	1	3347	tags=56%, list=29%, signal=78%
FERREIRA_EWINGS_SARCOMA_UNSTABLE_VS_STABLE_UP	FERREIRA_EWINGS_SARCOMA_UNSTABLE_VS_STABLE_UP		132	0.414686	1.66009	0.0017094	0.0474307	1	2206	tags=36%, list=19%, signal=44%
GSE14415_INDUCED_TREG_VS_TCONV_UP	GSE14415_INDUCED_TREG_VS_TCONV_UP		166	0.40341	1.65965	0	0.0475412	1	2203	tags=34%, list=19%, signal=42%
GO_CELL_CYCLE_PHASE_TRANSITION	GO_CELL_CYCLE_PHASE_TRANSITION		217	0.386887	1.65768	0	0.0483392	1	3145	tags=41%, list=27%, signal=56%
GNF2_KPNB1	GNF2_KPNB1		68	0.459231	1.65706	0.0017331	0.0485437	1	2940	tags=47%, list=25%, signal=63%
REACTOME_LATE_PHASE_OF_HIV_LIFE_CYCLE	REACTOME_LATE_PHASE_OF_HIV_LIFE_CYCLE		94	0.432719	1.65599	0	0.0490057	1	2766	tags=37%, list=24%, signal=49%
REACTOME_HIV_LIFE_CYCLE	REACTOME_HIV_LIFE_CYCLE		105	0.431146	1.65474	0	0.0494932	1	2685	tags=37%, list=23%, signal=48%
BERENJENO_TRANSFORMED_BY_RHOA_UP	BERENJENO_TRANSFORMED_BY_RHOA_UP		454	0.359338	1.65449	0	0.0495035	1	2487	tags=32%, list=21%, signal=39%
MORF_BCL2L11	MORF_BCL2L11		71	0.454202	1.65414	0.00182149	0.0495572	1	2113	tags=27%, list=18%, signal=33%
GO_CATION_CATION_ANTIPORTER_ACTIVITY	GO_CATION_CATION_ANTIPORTER_ACTIVITY		15	0.647556	1.65259	0.0108893	0.0502342	1	1923	tags=47%, list=17%, signal=56%
GSE22313_HEALTHY_VS_SLE_MOUSE_CD4_TCELL_DN	GSE22313_HEALTHY_VS_SLE_MOUSE_CD4_TCELL_DN		146	0.409734	1.65252	0	0.0501554	1	2194	tags=33%, list=19%, signal=40%
GSE23568_ID3_KO_VS_WT_CD8_TCELL_UP	GSE23568_ID3_KO_VS_WT_CD8_TCELL_UP		177	0.394839	1.6524	0	0.0500995	1	2344	tags=34%, list=20%, signal=42%
GSE14000_4H_VS_16H_LPS_DC_TRANSLATED_RNA_DN	GSE14000_4H_VS_16H_LPS_DC_TRANSLATED_RNA_DN		165	0.404846	1.65209	0	0.0501339	1	2589	tags=35%, list=22%, signal=45%
HALLMARK_SPERMATOGENESIS	HALLMARK_SPERMATOGENESIS		65	0.465462	1.65168	0.0037594	0.0502131	1	1932	tags=32%, list=17%, signal=39%
REACTOME_INTERACTIONS_OF_VPR_WITH_HOST_CELLULAR_PROTEINS	REACTOME_INTERACTIONS_OF_VPR_WITH_HOST_CELLULAR_PROTEINS		30	0.540847	1.65006	0.00369004	0.0509478	1	3029	tags=43%, list=26%, signal=59%
WHITFIELD_CELL_CYCLE_S	WHITFIELD_CELL_CYCLE_S		132	0.413573	1.64715	0.00178253	0.0523502	1	2449	tags=33%, list=21%, signal=41%
MORF_DEK	MORF_DEK		253	0.380335	1.64714	0	0.0522358	1	2722	tags=36%, list=24%, signal=47%
GSE14413_UNSTIM_VS_IFNB_STIM_L929_CELLS_DN	GSE14413_UNSTIM_VS_IFNB_STIM_L929_CELLS_DN		38	0.510867	1.64695	0.0114286	0.0522061	1	2546	tags=42%, list=22%, signal=54%
REACTOME_AMINO_ACID_TRANSPORT_ACROSS_THE_PLASMA_MEMBRANE	REACTOME_AMINO_ACID_TRANSPORT_ACROSS_THE_PLASMA_MEMBRANE		16	0.635054	1.64659	0.0227704	0.0522382	1	1219	tags=31%, list=11%, signal=35%
VERNELL_RETINOBLASTOMA_PATHWAY_UP	VERNELL_RETINOBLASTOMA_PATHWAY_UP		62	0.467309	1.64455	0.00176367	0.0532182	1	2525	tags=56%, list=22%, signal=72%
LY_AGING_OLD_DN	LY_AGING_OLD_DN		50	0.489757	1.64429	0.00566038	0.0532337	1	2311	tags=42%, list=20%, signal=52%
NAKAMURA_TUMOR_ZONE_PERIPHERAL_VS_CENTRAL_UP	NAKAMURA_TUMOR_ZONE_PERIPHERAL_VS_CENTRAL_UP		206	0.388024	1.64379	0	0.0533706	1	2180	tags=32%, list=19%, signal=39%
GO_NUCLEAR_CHROMATIN	GO_NUCLEAR_CHROMATIN		233	0.383747	1.64186	0	0.054203	1	1681	tags=27%, list=15%, signal=31%
GSE3982_MAC_VS_TH2_DN	GSE3982_MAC_VS_TH2_DN		158	0.398516	1.63967	0	0.0552998	1	2262	tags=31%, list=20%, signal=38%
MEINHOLD_OVARIAN_CANCER_LOW_GRADE_DN	MEINHOLD_OVARIAN_CANCER_LOW_GRADE_DN		20	0.602204	1.63754	0.0110092	0.0563657	1	2217	tags=45%, list=19%, signal=56%
MODULE_315	MODULE_315		16	0.624733	1.63698	0.0160142	0.0565335	1	856	tags=50%, list=7%, signal=54%
SUNG_METASTASIS_STROMA_DN	SUNG_METASTASIS_STROMA_DN		38	0.517863	1.6361	0.00917431	0.0568532	1	2403	tags=53%, list=21%, signal=66%
GSE22601_DOUBLE_POSITIVE_VS_CD4_SINGLE_POSITIVE_THYMOCYTE_DN	GSE22601_DOUBLE_POSITIVE_VS_CD4_SINGLE_POSITIVE_THYMOCYTE_DN		172	0.394804	1.63439	0	0.0576619	1	1695	tags=27%, list=15%, signal=31%
PID_PLK1_PATHWAY	PID_PLK1_PATHWAY		40	0.502997	1.6342	0.0019084	0.057638	1	1756	tags=35%, list=15%, signal=41%
MODULE_125	MODULE_125		42	0.492982	1.63286	0.00380952	0.0583189	1	2821	tags=55%, list=24%, signal=72%
GSE13522_CTRL_VS_T_CRUZI_Y_STRAIN_INF_SKIN_BALBC_MOUSE_UP	GSE13522_CTRL_VS_T_CRUZI_Y_STRAIN_INF_SKIN_BALBC_MOUSE_UP		103	0.428576	1.63233	0.00539568	0.058474	1	2455	tags=34%, list=21%, signal=43%
GSE18791_CTRL_VS_NEWCASTLE_VIRUS_DC_16H_UP	GSE18791_CTRL_VS_NEWCASTLE_VIRUS_DC_16H_UP		171	0.395688	1.63142	0	0.0588983	1	2669	tags=35%, list=23%, signal=45%
GSE22886_NAIVE_CD4_TCELL_VS_48H_ACT_TH2_DN	GSE22886_NAIVE_CD4_TCELL_VS_48H_ACT_TH2_DN		184	0.39536	1.63008	0.00171821	0.0595356	1	2890	tags=38%, list=25%, signal=49%
MORF_EIF3S2	MORF_EIF3S2		231	0.379125	1.62919	0	0.0599697	1	2851	tags=36%, list=25%, signal=47%
GSE3982_MAST_CELL_VS_TH2_DN	GSE3982_MAST_CELL_VS_TH2_DN		161	0.399053	1.62916	0	0.0598523	1	2464	tags=36%, list=21%, signal=45%
SHEPARD_CRUSH_AND_BURN_MUTANT_DN	SHEPARD_CRUSH_AND_BURN_MUTANT_DN		116	0.417984	1.62788	0	0.0604167	1	2230	tags=37%, list=19%, signal=45%
GSE31082_DN_VS_CD4_SP_THYMOCYTE_UP	GSE31082_DN_VS_CD4_SP_THYMOCYTE_UP		158	0.394158	1.62712	0.00176056	0.0607424	1	3312	tags=37%, list=29%, signal=52%
GSE24634_TEFF_VS_TCONV_DAY10_IN_CULTURE_UP	GSE24634_TEFF_VS_TCONV_DAY10_IN_CULTURE_UP		169	0.39347	1.62588	0	0.0614003	1	1321	tags=24%, list=11%, signal=26%
GSE21033_CTRL_VS_POLYIC_STIM_DC_3H_UP	GSE21033_CTRL_VS_POLYIC_STIM_DC_3H_UP		168	0.391789	1.62431	0	0.0621556	1	2211	tags=29%, list=19%, signal=36%
GO_DNA_STRAND_ELONGATION_INVOLVED_IN_DNA_REPLICATION	GO_DNA_STRAND_ELONGATION_INVOLVED_IN_DNA_REPLICATION		24	0.555121	1.62372	0.0162272	0.0623903	1	1926	tags=50%, list=17%, signal=60%
GAZDA_DIAMOND_BLACKFAN_ANEMIA_ERYTHROID_UP	GAZDA_DIAMOND_BLACKFAN_ANEMIA_ERYTHROID_UP		23	0.57709	1.62371	0.0110906	0.0622601	1	1589	tags=26%, list=14%, signal=30%
GCM_CHUK	GCM_CHUK		68	0.450175	1.62294	0.00555556	0.0625631	1	2439	tags=38%, list=21%, signal=48%
GO_TRNA_SPECIFIC_RIBONUCLEASE_ACTIVITY	GO_TRNA_SPECIFIC_RIBONUCLEASE_ACTIVITY		15	0.625625	1.62264	0.0149254	0.0626423	1	3252	tags=73%, list=28%, signal=102%
FISCHER_G1_S_CELL_CYCLE	FISCHER_G1_S_CELL_CYCLE		153	0.398218	1.62252	0	0.062571	1	2997	tags=48%, list=26%, signal=64%
KEGG_SPLICEOSOME	KEGG_SPLICEOSOME		118	0.408924	1.62251	0	0.0624445	1	2777	tags=43%, list=24%, signal=56%
GSE19923_WT_VS_HEB_AND_E2A_KO_DP_THYMOCYTE_UP	GSE19923_WT_VS_HEB_AND_E2A_KO_DP_THYMOCYTE_UP		180	0.387384	1.62213	0	0.0625261	1	2570	tags=35%, list=22%, signal=44%
CUI_TCF21_TARGETS_2_UP	CUI_TCF21_TARGETS_2_UP		262	0.371272	1.62122	0	0.0629205	1	2455	tags=34%, list=21%, signal=43%
GNF2_XRCC5	GNF2_XRCC5		72	0.444657	1.61864	0.00719425	0.064375	1	2588	tags=42%, list=22%, signal=53%
GO_DNA_INTEGRITY_CHECKPOINT	GO_DNA_INTEGRITY_CHECKPOINT		122	0.411751	1.61796	0.00175747	0.0647045	1	2970	tags=44%, list=26%, signal=59%
GO_ANION_CATION_SYMPORTER_ACTIVITY	GO_ANION_CATION_SYMPORTER_ACTIVITY		17	0.60898	1.61654	0.0226843	0.0654668	1	762	tags=29%, list=7%, signal=31%
GO_SMALL_NUCLEAR_RIBONUCLEOPROTEIN_COMPLEX	GO_SMALL_NUCLEAR_RIBONUCLEOPROTEIN_COMPLEX		53	0.473491	1.61614	0.00539568	0.0655737	1	2768	tags=47%, list=24%, signal=62%
REACTOME_CLEAVAGE_OF_GROWING_TRANSCRIPT_IN_THE_TERMINATION_REGION_	REACTOME_CLEAVAGE_OF_GROWING_TRANSCRIPT_IN_THE_TERMINATION_REGION_		38	0.505396	1.61609	0.0111524	0.0654723	1	2053	tags=34%, list=18%, signal=41%
GSE32164_RESTING_DIFFERENTIATED_VS_ALTERNATIVELY_ACT_M2_MACROPHAGE_UP	GSE32164_RESTING_DIFFERENTIATED_VS_ALTERNATIVELY_ACT_M2_MACROPHAGE_UP		137	0.402286	1.61606	0.00178571	0.0653492	1	2319	tags=39%, list=20%, signal=49%
CHR14Q13	CHR14Q13		19	0.580421	1.61598	0.016791	0.0652515	1	3070	tags=58%, list=27%, signal=79%
GO_RECOMBINATIONAL_REPAIR	GO_RECOMBINATIONAL_REPAIR		64	0.4565	1.61547	0.00580271	0.0654285	1	2215	tags=39%, list=19%, signal=48%
GSE13485_DAY3_VS_DAY21_YF17D_VACCINE_PBMC_DN	GSE13485_DAY3_VS_DAY21_YF17D_VACCINE_PBMC_DN		39	0.496276	1.61547	0.0123457	0.0652931	1	869	tags=21%, list=8%, signal=22%
GO_MITOTIC_RECOMBINATION	GO_MITOTIC_RECOMBINATION		38	0.50807	1.61546	0.00539568	0.0651612	1	2987	tags=55%, list=26%, signal=74%
MCAATNNNNNGCG_UNKNOWN	MCAATNNNNNGCG_UNKNOWN		62	0.462345	1.61534	0.00553505	0.0651086	1	1519	tags=27%, list=13%, signal=31%
MORF_AATF	MORF_AATF		194	0.384549	1.6149	0	0.0652744	1	2864	tags=37%, list=25%, signal=48%
GNF2_RPA1	GNF2_RPA1		26	0.5443	1.61423	0.015873	0.0655437	1	2628	tags=65%, list=23%, signal=84%
MORF_BUB1	MORF_BUB1		51	0.477597	1.61383	0.0126812	0.0656572	1	2190	tags=37%, list=19%, signal=46%
GO_NEGATIVE_REGULATION_OF_CHROMOSOME_SEGREGATION	GO_NEGATIVE_REGULATION_OF_CHROMOSOME_SEGREGATION		24	0.546767	1.61334	0.0172414	0.0658234	1	1553	tags=38%, list=13%, signal=43%
CHIANG_LIVER_CANCER_SUBCLASS_PROLIFERATION_UP	CHIANG_LIVER_CANCER_SUBCLASS_PROLIFERATION_UP		144	0.401789	1.6132	0	0.0657929	1	2311	tags=40%, list=20%, signal=49%
GSE14000_UNSTIM_VS_4H_LPS_DC_UP	GSE14000_UNSTIM_VS_4H_LPS_DC_UP		163	0.39392	1.61319	0	0.065659	1	2904	tags=40%, list=25%, signal=52%
GO_SPINDLE	GO_SPINDLE		232	0.376809	1.61282	0	0.0657613	1	2993	tags=41%, list=26%, signal=54%
PRC2_EZH2_UP.V1_DN	PRC2_EZH2_UP.V1_DN		118	0.408944	1.61233	0	0.0659302	1	2886	tags=43%, list=25%, signal=57%
GSE36826_WT_VS_IL1R_KO_SKIN_STAPH_AUREUS_INF_UP	GSE36826_WT_VS_IL1R_KO_SKIN_STAPH_AUREUS_INF_UP		177	0.392182	1.61232	0	0.0658011	1	1889	tags=27%, list=16%, signal=32%
GO_ERROR_PRONE_TRANSLESION_SYNTHESIS	GO_ERROR_PRONE_TRANSLESION_SYNTHESIS		17	0.622164	1.61206	0.0247148	0.0658381	1	2180	tags=59%, list=19%, signal=72%
GO_DOUBLE_STRAND_BREAK_REPAIR	GO_DOUBLE_STRAND_BREAK_REPAIR		138	0.402176	1.61134	0	0.0661484	1	2253	tags=36%, list=19%, signal=44%
MODULE_352	MODULE_352		17	0.611783	1.61093	0.021978	0.0662754	1	2884	tags=53%, list=25%, signal=70%
PAL_PRMT5_TARGETS_UP	PAL_PRMT5_TARGETS_UP		174	0.389369	1.61086	0.00181818	0.0661905	1	1395	tags=22%, list=12%, signal=24%
REACTOME_INHIBITION_OF_THE_PROTEOLYTIC_ACTIVITY_OF_APC_C_REQUIRED_FOR_THE_ONSET_OF_ANAPHASE_BY_MITOTIC_SPINDLE_CHECKPOINT_COMPONENTS	REACTOME_INHIBITION_OF_THE_PROTEOLYTIC_ACTIVITY_OF_APC_C_REQUIRED_FOR_THE_ONSET_OF_ANAPHASE_BY_MITOTIC_SPINDLE_CHECKPOINT_COMPONENTS		15	0.633435	1.6106	0.0220183	0.0662263	1	2335	tags=53%, list=20%, signal=67%
GO_DNA_STRAND_ELONGATION	GO_DNA_STRAND_ELONGATION		27	0.545682	1.61056	0.0133333	0.0661165	1	2132	tags=52%, list=18%, signal=63%
GSE13547_2H_VS_12_H_ANTI_IGM_STIM_BCELL_DN	GSE13547_2H_VS_12_H_ANTI_IGM_STIM_BCELL_DN		166	0.389497	1.6088	0	0.0670632	1	2817	tags=39%, list=24%, signal=51%
GSE18791_CTRL_VS_NEWCASTLE_VIRUS_DC_8H_UP	GSE18791_CTRL_VS_NEWCASTLE_VIRUS_DC_8H_UP		168	0.38774	1.60815	0	0.0673418	1	3063	tags=43%, list=26%, signal=58%
REACTOME_REGULATION_OF_GLUCOKINASE_BY_GLUCOKINASE_REGULATORY_PROTEIN	REACTOME_REGULATION_OF_GLUCOKINASE_BY_GLUCOKINASE_REGULATORY_PROTEIN		23	0.574346	1.60743	0.0111317	0.0676545	1	3029	tags=48%, list=26%, signal=65%
RIZ_ERYTHROID_DIFFERENTIATION	RIZ_ERYTHROID_DIFFERENTIATION		62	0.452059	1.60732	0.00183823	0.0675989	1	2311	tags=40%, list=20%, signal=50%
REACTOME_ELONGATION_ARREST_AND_RECOVERY	REACTOME_ELONGATION_ARREST_AND_RECOVERY		27	0.557463	1.60645	0.0132075	0.067992	1	1014	tags=33%, list=9%, signal=36%
GO_SOLUTE_SODIUM_SYMPORTER_ACTIVITY	GO_SOLUTE_SODIUM_SYMPORTER_ACTIVITY		15	0.62528	1.60619	0.0303571	0.067996	1	642	tags=20%, list=6%, signal=21%
BUCKANOVICH_T_LYMPHOCYTE_HOMING_ON_TUMOR_DN	BUCKANOVICH_T_LYMPHOCYTE_HOMING_ON_TUMOR_DN		16	0.611725	1.60517	0.0149813	0.0685402	1	1498	tags=50%, list=13%, signal=57%
PID_BARD1_PATHWAY	PID_BARD1_PATHWAY		27	0.549911	1.60468	0.00790514	0.0687168	1	2203	tags=48%, list=19%, signal=59%
REACTOME_GAB1_SIGNALOSOME	REACTOME_GAB1_SIGNALOSOME		30	0.528065	1.60347	0.0153551	0.069341	1	1119	tags=23%, list=10%, signal=26%
MODULE_124	MODULE_124		88	0.432533	1.603	0.00185529	0.0695403	1	1997	tags=35%, list=17%, signal=42%
CHICAS_RB1_TARGETS_GROWING	CHICAS_RB1_TARGETS_GROWING		165	0.392213	1.60254	0	0.0697165	1	1660	tags=29%, list=14%, signal=33%
MORF_CDK2	MORF_CDK2		70	0.441745	1.60192	0.00180832	0.0699707	1	2821	tags=46%, list=24%, signal=60%
GO_CELL_SURFACE_RECEPTOR_SIGNALING_PATHWAY_INVOLVED_IN_CELL_CELL_SIGNALING	GO_CELL_SURFACE_RECEPTOR_SIGNALING_PATHWAY_INVOLVED_IN_CELL_CELL_SIGNALING		25	0.546942	1.6013	0.0190114	0.0702487	1	2977	tags=44%, list=26%, signal=59%
GO_SINGLE_STRANDED_DNA_BINDING	GO_SINGLE_STRANDED_DNA_BINDING		76	0.436395	1.60042	0.00570342	0.0707197	1	2687	tags=38%, list=23%, signal=49%
GO_ORGANIC_ACID_TRANSMEMBRANE_TRANSPORTER_ACTIVITY	GO_ORGANIC_ACID_TRANSMEMBRANE_TRANSPORTER_ACTIVITY		57	0.460627	1.59949	0.00733945	0.0711421	1	1219	tags=19%, list=11%, signal=21%
MODULE_331	MODULE_331		58	0.459199	1.59812	0.00368324	0.0718975	1	2247	tags=34%, list=19%, signal=43%
GSE22935_WT_VS_MYD88_KO_MACROPHAGE_DN	GSE22935_WT_VS_MYD88_KO_MACROPHAGE_DN		101	0.418473	1.59725	0	0.0723201	1	1839	tags=26%, list=16%, signal=30%
REACTOME_PI3K_EVENTS_IN_ERBB4_SIGNALING	REACTOME_PI3K_EVENTS_IN_ERBB4_SIGNALING		27	0.53492	1.59598	0.0294118	0.0729938	1	1119	tags=26%, list=10%, signal=29%
REACTOME_SYNTHESIS_OF_DNA	REACTOME_SYNTHESIS_OF_DNA		87	0.423189	1.59598	0	0.0728531	1	2289	tags=38%, list=20%, signal=47%
GSE24026_PD1_LIGATION_VS_CTRL_IN_ACT_TCELL_LINE_DN	GSE24026_PD1_LIGATION_VS_CTRL_IN_ACT_TCELL_LINE_DN		168	0.393022	1.59565	0	0.072926	1	2503	tags=37%, list=22%, signal=46%
GO_RNA_POLYMERASE_ACTIVITY	GO_RNA_POLYMERASE_ACTIVITY		42	0.488877	1.59526	0.00961539	0.0730979	1	2895	tags=48%, list=25%, signal=63%
MORF_UBE2N	MORF_UBE2N		89	0.422153	1.59464	0.00542496	0.0733797	1	2937	tags=39%, list=25%, signal=52%
NICK_RESPONSE_TO_PROC_TREATMENT_DN	NICK_RESPONSE_TO_PROC_TREATMENT_DN		22	0.574847	1.59363	0.0163043	0.0739696	1	156	tags=14%, list=1%, signal=14%
GO_TELOMERE_CAPPING	GO_TELOMERE_CAPPING		24	0.541965	1.59334	0.0257827	0.0740389	1	1850	tags=46%, list=16%, signal=54%
GO_STRAND_DISPLACEMENT	GO_STRAND_DISPLACEMENT		24	0.546762	1.5931	0.0115607	0.0740444	1	2203	tags=50%, list=19%, signal=62%
MORF_RRM1	MORF_RRM1		97	0.417091	1.59112	0.00683761	0.0753211	1	2722	tags=40%, list=24%, signal=52%
REACTOME_RNA_POL_II_TRANSCRIPTION	REACTOME_RNA_POL_II_TRANSCRIPTION		92	0.425978	1.59093	0.00702988	0.0753213	1	2457	tags=34%, list=21%, signal=42%
GNF2_PPP6C	GNF2_PPP6C		37	0.503547	1.59053	0.00961539	0.0754419	1	1864	tags=32%, list=16%, signal=39%
GO_ENDORIBONUCLEASE_ACTIVITY_PRODUCING_5_PHOSPHOMONOESTERS	GO_ENDORIBONUCLEASE_ACTIVITY_PRODUCING_5_PHOSPHOMONOESTERS		24	0.544137	1.5903	0.030888	0.0754486	1	1503	tags=38%, list=13%, signal=43%
MORF_UBE2I	MORF_UBE2I		232	0.371485	1.58956	0	0.0758297	1	2862	tags=35%, list=25%, signal=45%
GSE14000_UNSTIM_VS_4H_LPS_DC_TRANSLATED_RNA_UP	GSE14000_UNSTIM_VS_4H_LPS_DC_TRANSLATED_RNA_UP		159	0.390558	1.58924	0.0017094	0.0759181	1	2953	tags=40%, list=26%, signal=52%
GSE1432_CTRL_VS_IFNG_6H_MICROGLIA_UP	GSE1432_CTRL_VS_IFNG_6H_MICROGLIA_UP		151	0.386374	1.58897	0.00182815	0.0759905	1	2689	tags=38%, list=23%, signal=49%
GO_PRE_MRNA_BINDING	GO_PRE_MRNA_BINDING		24	0.543068	1.58708	0.013913	0.0771591	1	3708	tags=67%, list=32%, signal=98%
GSE5542_IFNG_VS_IFNA_TREATED_EPITHELIAL_CELLS_6H_UP	GSE5542_IFNG_VS_IFNA_TREATED_EPITHELIAL_CELLS_6H_UP		161	0.383518	1.5855	0	0.0781981	1	1989	tags=27%, list=17%, signal=32%
GSE17974_0H_VS_48H_IN_VITRO_ACT_CD4_TCELL_DN	GSE17974_0H_VS_48H_IN_VITRO_ACT_CD4_TCELL_DN		169	0.380116	1.5855	0.00182482	0.0780558	1	1804	tags=29%, list=16%, signal=34%
MORF_CAMK4	MORF_CAMK4		109	0.41091	1.58536	0	0.0780233	1	2516	tags=31%, list=22%, signal=39%
GROSS_HYPOXIA_VIA_ELK3_UP	GROSS_HYPOXIA_VIA_ELK3_UP		171	0.382776	1.58495	0	0.0781737	1	1767	tags=25%, list=15%, signal=29%
GSE2585_CD80_HIGH_VS_LOW_MTEC_DN	GSE2585_CD80_HIGH_VS_LOW_MTEC_DN		110	0.409353	1.58467	0	0.0782198	1	1729	tags=27%, list=15%, signal=32%
GO_TRNA_TRANSPORT	GO_TRNA_TRANSPORT		30	0.526419	1.58367	0.0114286	0.0787965	1	3029	tags=43%, list=26%, signal=59%
MODULE_81	MODULE_81		20	0.574507	1.5833	0.0254545	0.0789183	1	2102	tags=45%, list=18%, signal=55%
FERRANDO_T_ALL_WITH_MLL_ENL_FUSION_DN	FERRANDO_T_ALL_WITH_MLL_ENL_FUSION_DN		79	0.426829	1.58108	0.0107527	0.0804511	1	2378	tags=43%, list=21%, signal=54%
FERRANDO_HOX11_NEIGHBORS	FERRANDO_HOX11_NEIGHBORS		16	0.608706	1.58025	0.0340265	0.0809694	1	2606	tags=69%, list=23%, signal=89%
GO_NUCLEAR_ENVELOPE_ORGANIZATION	GO_NUCLEAR_ENVELOPE_ORGANIZATION		71	0.438877	1.57782	0.00356506	0.0826568	1	3111	tags=45%, list=27%, signal=61%
GO_REGULATION_OF_GENE_SILENCING	GO_REGULATION_OF_GENE_SILENCING		39	0.494539	1.57667	0.016791	0.0834467	1	2389	tags=44%, list=21%, signal=55%
GSE11961_MARGINAL_ZONE_BCELL_VS_MEMORY_BCELL_DAY7_DN	GSE11961_MARGINAL_ZONE_BCELL_VS_MEMORY_BCELL_DAY7_DN		63	0.438139	1.57529	0.0088968	0.0843231	1	2558	tags=32%, list=22%, signal=41%
GSE32164_ALTERNATIVELY_ACT_M2_VS_CMYC_INHIBITED_MACROPHAGE_DN	GSE32164_ALTERNATIVELY_ACT_M2_VS_CMYC_INHIBITED_MACROPHAGE_DN		166	0.38252	1.57411	0	0.0850746	1	2253	tags=33%, list=19%, signal=41%
GCM_ANP32B	GCM_ANP32B		36	0.494375	1.57305	0.0167598	0.0857087	1	1033	tags=25%, list=9%, signal=27%
BRACHAT_RESPONSE_TO_CAMPTOTHECIN_UP	BRACHAT_RESPONSE_TO_CAMPTOTHECIN_UP		22	0.56002	1.57251	0.0194553	0.0859307	1	633	tags=23%, list=5%, signal=24%
GO_NUCLEUS_ORGANIZATION	GO_NUCLEUS_ORGANIZATION		108	0.399145	1.57029	0.00684931	0.0874434	1	3029	tags=41%, list=26%, signal=55%
GSE5679_CTRL_VS_RARA_AGONIST_AM580_TREATED_DC_UP	GSE5679_CTRL_VS_RARA_AGONIST_AM580_TREATED_DC_UP		176	0.378053	1.5697	0.00172414	0.0877883	1	2336	tags=35%, list=20%, signal=43%
FOURNIER_ACINAR_DEVELOPMENT_LATE_2	FOURNIER_ACINAR_DEVELOPMENT_LATE_2		251	0.362215	1.5695	0	0.0877811	1	3013	tags=41%, list=26%, signal=54%
GO_NUCLEOTIDE_EXCISION_REPAIR	GO_NUCLEOTIDE_EXCISION_REPAIR		105	0.409701	1.5691	0.00848896	0.0879531	1	2385	tags=36%, list=21%, signal=45%
GOLDRATH_EFF_VS_MEMORY_CD8_TCELL_UP	GOLDRATH_EFF_VS_MEMORY_CD8_TCELL_UP		178	0.379076	1.56852	0	0.0882394	1	2028	tags=37%, list=18%, signal=44%
MOREAUX_MULTIPLE_MYELOMA_BY_TACI_DN	MOREAUX_MULTIPLE_MYELOMA_BY_TACI_DN		153	0.391102	1.56804	0.00359712	0.0884546	1	1894	tags=29%, list=16%, signal=35%
ZHENG_GLIOBLASTOMA_PLASTICITY_UP	ZHENG_GLIOBLASTOMA_PLASTICITY_UP		163	0.387815	1.56804	0.00175439	0.0882938	1	1890	tags=31%, list=16%, signal=37%
GSE37532_TREG_VS_TCONV_CD4_TCELL_FROM_LN_UP	GSE37532_TREG_VS_TCONV_CD4_TCELL_FROM_LN_UP		172	0.379707	1.56803	0	0.0881412	1	2566	tags=34%, list=22%, signal=43%
GO_AMINO_ACID_TRANSMEMBRANE_TRANSPORT	GO_AMINO_ACID_TRANSMEMBRANE_TRANSPORT		29	0.520394	1.56749	0.0274223	0.0884374	1	1219	tags=24%, list=11%, signal=27%
MORF_PRKDC	MORF_PRKDC		180	0.376846	1.56726	0	0.0884454	1	2910	tags=37%, list=25%, signal=49%
GSE29614_CTRL_VS_TIV_FLU_VACCINE_PBMC_2007_DN	GSE29614_CTRL_VS_TIV_FLU_VACCINE_PBMC_2007_DN		96	0.410061	1.56561	0.00542496	0.0895868	1	2190	tags=34%, list=19%, signal=42%
JAEGER_METASTASIS_DN	JAEGER_METASTASIS_DN		97	0.411201	1.56523	0.00368324	0.0897457	1	1679	tags=20%, list=15%, signal=23%
STAMBOLSKY_RESPONSE_TO_VITAMIN_D3_DN	STAMBOLSKY_RESPONSE_TO_VITAMIN_D3_DN		19	0.572491	1.56446	0.02	0.0901752	1	1471	tags=32%, list=13%, signal=36%
ZAMORA_NOS2_TARGETS_UP	ZAMORA_NOS2_TARGETS_UP		59	0.442142	1.56415	0.00723327	0.0902657	1	2403	tags=39%, list=21%, signal=49%
REACTOME_APC_C_CDC20_MEDIATED_DEGRADATION_OF_CYCLIN_B	REACTOME_APC_C_CDC20_MEDIATED_DEGRADATION_OF_CYCLIN_B		16	0.595233	1.56409	0.0347349	0.0901427	1	3784	tags=75%, list=33%, signal=111%
GSE22045_TREG_VS_TCONV_UP	GSE22045_TREG_VS_TCONV_UP		114	0.408545	1.56343	0.00178571	0.0905378	1	1927	tags=31%, list=17%, signal=36%
MORF_ERH	MORF_ERH		112	0.40229	1.56311	0.0034965	0.0906683	1	2606	tags=36%, list=23%, signal=46%
GNF2_BUB3	GNF2_BUB3		28	0.524355	1.56294	0.0196078	0.0906537	1	2487	tags=54%, list=21%, signal=68%
GSE28726_NAIVE_VS_ACTIVATED_CD4_TCELL_DN	GSE28726_NAIVE_VS_ACTIVATED_CD4_TCELL_DN		178	0.377684	1.56293	0.00177936	0.0905012	1	1652	tags=29%, list=14%, signal=33%
MORF_CCNF	MORF_CCNF		68	0.433144	1.56211	0.0108499	0.0910709	1	2233	tags=32%, list=19%, signal=40%
CHICAS_RB1_TARGETS_LOW_SERUM	CHICAS_RB1_TARGETS_LOW_SERUM		74	0.422653	1.56018	0.00723327	0.0924766	1	2561	tags=36%, list=22%, signal=47%
GSE3982_MAC_VS_TH1_DN	GSE3982_MAC_VS_TH1_DN		167	0.377377	1.56017	0	0.0923228	1	2195	tags=30%, list=19%, signal=36%
GO_COENZYME_A_METABOLIC_PROCESS	GO_COENZYME_A_METABOLIC_PROCESS		15	0.607575	1.55991	0.0287908	0.09235	1	1241	tags=27%, list=11%, signal=30%
GO_NEGATIVE_REGULATION_OF_MITOTIC_CELL_CYCLE	GO_NEGATIVE_REGULATION_OF_MITOTIC_CELL_CYCLE		160	0.377011	1.55922	0.00175439	0.0927858	1	2650	tags=36%, list=23%, signal=46%
RB_P107_DN.V1_UP	RB_P107_DN.V1_UP		101	0.406722	1.55841	0.00363636	0.0933122	1	1462	tags=28%, list=13%, signal=31%
FARDIN_HYPOXIA_11	FARDIN_HYPOXIA_11		30	0.506802	1.55703	0.0264151	0.0943622	1	757	tags=17%, list=7%, signal=18%
GSE360_L_MAJOR_VS_T_GONDII_MAC_DN	GSE360_L_MAJOR_VS_T_GONDII_MAC_DN		153	0.373363	1.55698	0	0.0942372	1	1399	tags=25%, list=12%, signal=29%
TOYOTA_TARGETS_OF_MIR34B_AND_MIR34C	TOYOTA_TARGETS_OF_MIR34B_AND_MIR34C		362	0.348732	1.55697	0	0.0940807	1	2203	tags=28%, list=19%, signal=33%
GNF2_SMC1L1	GNF2_SMC1L1		27	0.519677	1.55638	0.0181818	0.0944077	1	2575	tags=56%, list=22%, signal=71%
GO_REPLICATION_FORK	GO_REPLICATION_FORK		59	0.446185	1.55556	0.00868056	0.0949646	1	3117	tags=49%, list=27%, signal=67%
GSE21360_SECONDARY_VS_TERTIARY_MEMORY_CD8_TCELL_UP	GSE21360_SECONDARY_VS_TERTIARY_MEMORY_CD8_TCELL_UP		190	0.373606	1.55504	0.00175747	0.0952717	1	1858	tags=27%, list=16%, signal=31%
AFFAR_YY1_TARGETS_DN	AFFAR_YY1_TARGETS_DN		156	0.384117	1.55413	0	0.0959064	1	1260	tags=26%, list=11%, signal=28%
GSE24634_IL4_VS_CTRL_TREATED_NAIVE_CD4_TCELL_DAY7_UP	GSE24634_IL4_VS_CTRL_TREATED_NAIVE_CD4_TCELL_DAY7_UP		165	0.380526	1.55317	0.00352734	0.0965605	1	1827	tags=28%, list=16%, signal=33%
GO_TERMINATION_OF_RNA_POLYMERASE_II_TRANSCRIPTION	GO_TERMINATION_OF_RNA_POLYMERASE_II_TRANSCRIPTION		56	0.443927	1.55294	0.0202952	0.0966125	1	2053	tags=29%, list=18%, signal=35%
GO_RNA_MODIFICATION	GO_RNA_MODIFICATION		100	0.407418	1.55241	0.00353982	0.0968699	1	2256	tags=32%, list=19%, signal=39%
PENG_GLUTAMINE_DEPRIVATION_UP	PENG_GLUTAMINE_DEPRIVATION_UP		31	0.500964	1.55215	0.028463	0.0969105	1	1296	tags=32%, list=11%, signal=36%
KOBAYASHI_EGFR_SIGNALING_24HR_UP	KOBAYASHI_EGFR_SIGNALING_24HR_UP		61	0.434495	1.55151	0.00756144	0.0973017	1	918	tags=21%, list=8%, signal=23%
HALLMARK_DNA_REPAIR	HALLMARK_DNA_REPAIR		136	0.381396	1.55025	0	0.0982426	1	2869	tags=41%, list=25%, signal=54%
GSE45365_WT_VS_IFNAR_KO_BCELL_DN	GSE45365_WT_VS_IFNAR_KO_BCELL_DN		105	0.405451	1.55025	0.003663	0.0980762	1	2253	tags=32%, list=19%, signal=40%
MORF_G22P1	MORF_G22P1		166	0.378254	1.54963	0.00175439	0.0984357	1	2852	tags=38%, list=25%, signal=50%
GSE14769_UNSTIM_VS_360MIN_LPS_BMDM_UP	GSE14769_UNSTIM_VS_360MIN_LPS_BMDM_UP		164	0.375369	1.54959	0	0.0983054	1	2274	tags=31%, list=20%, signal=38%
GO_RNA_METHYLTRANSFERASE_ACTIVITY	GO_RNA_METHYLTRANSFERASE_ACTIVITY		36	0.488477	1.54917	0.0167598	0.0984879	1	2392	tags=33%, list=21%, signal=42%
GSE13547_CTRL_VS_ANTI_IGM_STIM_ZFX_KO_BCELL_2H_UP	GSE13547_CTRL_VS_ANTI_IGM_STIM_ZFX_KO_BCELL_2H_UP		140	0.385808	1.54894	0.00183823	0.0985372	1	1890	tags=33%, list=16%, signal=39%
BENPORATH_ES_1	BENPORATH_ES_1		271	0.35689	1.54889	0	0.0984051	1	2201	tags=31%, list=19%, signal=38%
MORF_DNMT1	MORF_DNMT1		112	0.399813	1.54887	0.00557621	0.0982591	1	2154	tags=32%, list=19%, signal=39%
GO_DNA_DAMAGE_RESPONSE_DETECTION_OF_DNA_DAMAGE	GO_DNA_DAMAGE_RESPONSE_DETECTION_OF_DNA_DAMAGE		33	0.496684	1.54879	0.0223048	0.0981551	1	2970	tags=52%, list=26%, signal=69%
GSE17721_POLYIC_VS_CPG_16H_BMDC_DN	GSE17721_POLYIC_VS_CPG_16H_BMDC_DN		157	0.377327	1.54873	0.00172414	0.0980433	1	1966	tags=25%, list=17%, signal=30%
CHIANG_LIVER_CANCER_SUBCLASS_UNANNOTATED_DN	CHIANG_LIVER_CANCER_SUBCLASS_UNANNOTATED_DN		175	0.374638	1.54849	0.00175131	0.0980668	1	2086	tags=28%, list=18%, signal=34%
GO_NUCLEAR_ENVELOPE_REASSEMBLY	GO_NUCLEAR_ENVELOPE_REASSEMBLY		17	0.584285	1.54809	0.0294659	0.0982677	1	969	tags=35%, list=8%, signal=38%
MORF_TTN	MORF_TTN		17	0.579647	1.54787	0.0350195	0.0983105	1	2496	tags=41%, list=22%, signal=52%
LY_AGING_MIDDLE_DN	LY_AGING_MIDDLE_DN		15	0.613581	1.54755	0.0379747	0.0983982	1	2190	tags=67%, list=19%, signal=82%
SCIAN_CELL_CYCLE_TARGETS_OF_TP53_AND_TP73_DN	SCIAN_CELL_CYCLE_TARGETS_OF_TP53_AND_TP73_DN		21	0.545861	1.54715	0.0364963	0.098583	1	1599	tags=48%, list=14%, signal=55%
REACTOME_TRANSPORT_OF_MATURE_MRNA_DERIVED_FROM_AN_INTRONLESS_TRANSCRIPT	REACTOME_TRANSPORT_OF_MATURE_MRNA_DERIVED_FROM_AN_INTRONLESS_TRANSCRIPT		30	0.515328	1.54666	0.0242086	0.0988495	1	3029	tags=40%, list=26%, signal=54%
GSE10239_NAIVE_VS_KLRG1HIGH_EFF_CD8_TCELL_DN	GSE10239_NAIVE_VS_KLRG1HIGH_EFF_CD8_TCELL_DN		167	0.374259	1.54661	0.00168634	0.0987389	1	2302	tags=35%, list=20%, signal=43%
GSE20366_EX_VIVO_VS_HOMEOSTATIC_CONVERSION_TREG_DN	GSE20366_EX_VIVO_VS_HOMEOSTATIC_CONVERSION_TREG_DN		145	0.384354	1.54569	0.00176367	0.0994015	1	2211	tags=28%, list=19%, signal=35%
GO_TRNA_METHYLTRANSFERASE_ACTIVITY	GO_TRNA_METHYLTRANSFERASE_ACTIVITY		17	0.580934	1.54487	0.0392523	0.0999757	1	1909	tags=29%, list=16%, signal=35%
PAX6_01	PAX6_01		60	0.442888	1.54479	0.00713013	0.099872	1	1844	tags=30%, list=16%, signal=35%
GO_RNA_SECONDARY_STRUCTURE_UNWINDING	GO_RNA_SECONDARY_STRUCTURE_UNWINDING		37	0.488617	1.54406	0.0222635	0.100382	1	4441	tags=70%, list=38%, signal=114%
GCM_USP6	GCM_USP6		58	0.447687	1.54383	0.0152672	0.100424	1	1441	tags=22%, list=12%, signal=25%
GSE2405_0H_VS_1.5H_A_PHAGOCYTOPHILUM_STIM_NEUTROPHIL_DN	GSE2405_0H_VS_1.5H_A_PHAGOCYTOPHILUM_STIM_NEUTROPHIL_DN		171	0.372045	1.54333	0.00176679	0.100719	1	2307	tags=29%, list=20%, signal=36%
CHR1P35	CHR1P35		61	0.433577	1.54267	0.00722022	0.10115	1	1821	tags=31%, list=16%, signal=37%
GO_REGULATION_OF_ALTERNATIVE_MRNA_SPLICING_VIA_SPLICEOSOME	GO_REGULATION_OF_ALTERNATIVE_MRNA_SPLICING_VIA_SPLICEOSOME		23	0.54466	1.54208	0.034413	0.101505	1	2013	tags=48%, list=17%, signal=58%
MORF_USP5	MORF_USP5		45	0.466387	1.54179	0.00756144	0.101589	1	864	tags=20%, list=7%, signal=22%
HAHTOLA_MYCOSIS_FUNGOIDES_SKIN_UP	HAHTOLA_MYCOSIS_FUNGOIDES_SKIN_UP		155	0.376694	1.54118	0	0.101996	1	2768	tags=36%, list=24%, signal=47%
REACTOME_PI3K_EVENTS_IN_ERBB2_SIGNALING	REACTOME_PI3K_EVENTS_IN_ERBB2_SIGNALING		30	0.505324	1.53885	0.0289331	0.103949	1	1119	tags=23%, list=10%, signal=26%
GO_REGULATION_OF_MEGAKARYOCYTE_DIFFERENTIATION	GO_REGULATION_OF_MEGAKARYOCYTE_DIFFERENTIATION		21	0.560651	1.53858	0.0279851	0.104036	1	1376	tags=33%, list=12%, signal=38%
GO_INTERMEDIATE_FILAMENT	GO_INTERMEDIATE_FILAMENT		32	0.501696	1.53765	0.0299625	0.104746	1	1624	tags=28%, list=14%, signal=33%
GO_GLUTAMINE_METABOLIC_PROCESS	GO_GLUTAMINE_METABOLIC_PROCESS		19	0.543242	1.53667	0.0428305	0.105469	1	930	tags=32%, list=8%, signal=34%
MORF_HAT1	MORF_HAT1		167	0.373777	1.53632	0.00699301	0.105641	1	2851	tags=38%, list=25%, signal=50%
GO_TRANSLATION_FACTOR_ACTIVITY_RNA_BINDING	GO_TRANSLATION_FACTOR_ACTIVITY_RNA_BINDING		77	0.413243	1.53581	0.00905797	0.105965	1	2102	tags=27%, list=18%, signal=33%
GSE17974_0H_VS_12H_IN_VITRO_ACT_CD4_TCELL_DN	GSE17974_0H_VS_12H_IN_VITRO_ACT_CD4_TCELL_DN		174	0.368648	1.53407	0	0.107457	1	1889	tags=30%, list=16%, signal=35%
GSE25085_FETAL_LIVER_VS_ADULT_BM_SP4_THYMIC_IMPLANT_UP	GSE25085_FETAL_LIVER_VS_ADULT_BM_SP4_THYMIC_IMPLANT_UP		161	0.370926	1.53396	0	0.107395	1	1531	tags=20%, list=13%, signal=23%
MORF_MSH2	MORF_MSH2		60	0.433442	1.53358	0.00743494	0.107596	1	2763	tags=42%, list=24%, signal=54%
CHR18Q11	CHR18Q11		17	0.56165	1.53316	0.0510018	0.107817	1	1282	tags=35%, list=11%, signal=40%
GO_REPLISOME	GO_REPLISOME		28	0.51671	1.53176	0.0228137	0.108947	1	2987	tags=54%, list=26%, signal=72%
ST_WNT_BETA_CATENIN_PATHWAY	ST_WNT_BETA_CATENIN_PATHWAY		18	0.559664	1.53155	0.0420315	0.10896	1	2218	tags=44%, list=19%, signal=55%
GO_ENDONUCLEASE_ACTIVITY_ACTIVE_WITH_EITHER_RIBO_OR_DEOXYRIBONUCLEIC_ACIDS_AND_PRODUCING_5_PHOSPHOMONOESTERS	GO_ENDONUCLEASE_ACTIVITY_ACTIVE_WITH_EITHER_RIBO_OR_DEOXYRIBONUCLEIC_ACIDS_AND_PRODUCING_5_PHOSPHOMONOESTERS		33	0.490546	1.53136	0.0378788	0.108951	1	1512	tags=36%, list=13%, signal=42%
ZHANG_BREAST_CANCER_PROGENITORS_UP	ZHANG_BREAST_CANCER_PROGENITORS_UP		352	0.340736	1.53021	0	0.109844	1	2591	tags=32%, list=22%, signal=40%
REACTOME_PI_3K_CASCADE	REACTOME_PI_3K_CASCADE		36	0.483368	1.52842	0.0242537	0.111417	1	1119	tags=19%, list=10%, signal=21%
GO_DNA_TEMPLATED_TRANSCRIPTION_ELONGATION	GO_DNA_TEMPLATED_TRANSCRIPTION_ELONGATION		87	0.401565	1.52758	0.00894454	0.11204	1	3278	tags=46%, list=28%, signal=64%
GO_REGULATION_OF_DNA_DEPENDENT_DNA_REPLICATION	GO_REGULATION_OF_DNA_DEPENDENT_DNA_REPLICATION		34	0.492696	1.5268	0.0225564	0.11267	1	2425	tags=47%, list=21%, signal=59%
MALONEY_RESPONSE_TO_17AAG_DN	MALONEY_RESPONSE_TO_17AAG_DN		71	0.423712	1.52643	0.0230089	0.112861	1	1582	tags=28%, list=14%, signal=32%
GO_MITOTIC_DNA_INTEGRITY_CHECKPOINT	GO_MITOTIC_DNA_INTEGRITY_CHECKPOINT		82	0.414703	1.52475	0.00534759	0.114364	1	2650	tags=43%, list=23%, signal=55%
E2F_03	E2F_03		192	0.365741	1.52405	0.00173913	0.114919	1	1450	tags=22%, list=13%, signal=25%
GO_SPINDLE_MICROTUBULE	GO_SPINDLE_MICROTUBULE		47	0.457433	1.52394	0.0166976	0.114845	1	2188	tags=36%, list=19%, signal=44%
VANTVEER_BREAST_CANCER_METASTASIS_DN	VANTVEER_BREAST_CANCER_METASTASIS_DN		97	0.398309	1.52382	0.0127505	0.114777	1	2301	tags=31%, list=20%, signal=38%
GSE5142_HTERT_TRANSDUCED_VS_CTRL_CD8_TCELL_LATE_PASSAGE_CLONE_UP	GSE5142_HTERT_TRANSDUCED_VS_CTRL_CD8_TCELL_LATE_PASSAGE_CLONE_UP		168	0.367985	1.52308	0.00687285	0.115325	1	2938	tags=38%, list=25%, signal=50%
GSE24574_BCL6_LOW_TFH_VS_TCONV_CD4_TCELL_DN	GSE24574_BCL6_LOW_TFH_VS_TCONV_CD4_TCELL_DN		188	0.366424	1.52198	0	0.116225	1	2154	tags=31%, list=19%, signal=37%
GSE5589_WT_VS_IL10_KO_LPS_STIM_MACROPHAGE_45MIN_UP	GSE5589_WT_VS_IL10_KO_LPS_STIM_MACROPHAGE_45MIN_UP		158	0.370937	1.52163	0.00171821	0.116413	1	2154	tags=33%, list=19%, signal=40%
GSE1460_INTRATHYMIC_T_PROGENITOR_VS_NAIVE_CD4_TCELL_CORD_BLOOD_UP	GSE1460_INTRATHYMIC_T_PROGENITOR_VS_NAIVE_CD4_TCELL_CORD_BLOOD_UP		181	0.365189	1.52115	0	0.116712	1	2449	tags=36%, list=21%, signal=45%
REACTOME_S_PHASE	REACTOME_S_PHASE		103	0.399223	1.52058	0.0052356	0.117097	1	2997	tags=44%, list=26%, signal=58%
OHM_METHYLATED_IN_ADULT_CANCERS	OHM_METHYLATED_IN_ADULT_CANCERS		15	0.580216	1.52033	0.037037	0.117174	1	1541	tags=33%, list=13%, signal=38%
GCM_DFFA	GCM_DFFA		109	0.39487	1.51976	0.00713013	0.117575	1	2463	tags=32%, list=21%, signal=40%
KEGG_PURINE_METABOLISM	KEGG_PURINE_METABOLISM		115	0.386168	1.51971	0.00177936	0.11745	1	2685	tags=35%, list=23%, signal=45%
GSE21063_WT_VS_NFATC1_KO_BCELL_DN	GSE21063_WT_VS_NFATC1_KO_BCELL_DN		169	0.368791	1.51924	0	0.11774	1	2753	tags=41%, list=24%, signal=53%
GO_DNA_DEPENDENT_ATPASE_ACTIVITY	GO_DNA_DEPENDENT_ATPASE_ACTIVITY		74	0.417996	1.51918	0.0177305	0.117613	1	2237	tags=38%, list=19%, signal=47%
GO_REGULATION_OF_CYTOKINESIS	GO_REGULATION_OF_CYTOKINESIS		46	0.461825	1.51888	0.0297952	0.117725	1	2250	tags=37%, list=19%, signal=46%
E2F_Q3	E2F_Q3		172	0.364597	1.51826	0.00169205	0.118162	1	2180	tags=27%, list=19%, signal=33%
GSE23505_IL6_IL1_VS_IL6_IL1_TGFB_TREATED_CD4_TCELL_DN	GSE23505_IL6_IL1_VS_IL6_IL1_TGFB_TREATED_CD4_TCELL_DN		169	0.365753	1.51807	0.00173611	0.118182	1	2694	tags=33%, list=23%, signal=43%
GSE34156_NOD2_LIGAND_VS_NOD2_AND_TLR1_TLR2_LIGAND_6H_TREATED_MONOCYTE_UP	GSE34156_NOD2_LIGAND_VS_NOD2_AND_TLR1_TLR2_LIGAND_6H_TREATED_MONOCYTE_UP		157	0.373501	1.51796	0.00347826	0.118108	1	3103	tags=36%, list=27%, signal=48%
WANG_RESPONSE_TO_GSK3_INHIBITOR_SB216763_DN	WANG_RESPONSE_TO_GSK3_INHIBITOR_SB216763_DN		310	0.34415	1.51785	0	0.118019	1	1849	tags=27%, list=16%, signal=32%
GSE22886_NAIVE_CD4_TCELL_VS_12H_ACT_TH1_DN	GSE22886_NAIVE_CD4_TCELL_VS_12H_ACT_TH1_DN		182	0.367756	1.51785	0	0.117839	1	2288	tags=33%, list=20%, signal=40%
VANTVEER_BREAST_CANCER_POOR_PROGNOSIS	VANTVEER_BREAST_CANCER_POOR_PROGNOSIS		33	0.493391	1.51779	0.0252252	0.117712	1	1975	tags=33%, list=17%, signal=40%
REACTOME_FORMATION_OF_THE_HIV1_EARLY_ELONGATION_COMPLEX	REACTOME_FORMATION_OF_THE_HIV1_EARLY_ELONGATION_COMPLEX		29	0.498314	1.51753	0.0348837	0.1178	1	2766	tags=48%, list=24%, signal=63%
GSE21927_BALBC_VS_C57BL6_MONOCYTE_SPLEEN_UP	GSE21927_BALBC_VS_C57BL6_MONOCYTE_SPLEEN_UP		111	0.394137	1.51749	0.0034662	0.117669	1	2285	tags=38%, list=20%, signal=47%
MODULE_72	MODULE_72		248	0.350279	1.51683	0	0.118151	1	2614	tags=33%, list=23%, signal=42%
REACTOME_TRANSPORT_OF_MATURE_TRANSCRIPT_TO_CYTOPLASM	REACTOME_TRANSPORT_OF_MATURE_TRANSCRIPT_TO_CYTOPLASM		49	0.451784	1.51676	0.0237226	0.118039	1	2053	tags=29%, list=18%, signal=35%
GSE21546_UNSTIM_VS_ANTI_CD3_STIM_SAP1A_KO_DP_THYMOCYTES_DN	GSE21546_UNSTIM_VS_ANTI_CD3_STIM_SAP1A_KO_DP_THYMOCYTES_DN		52	0.442818	1.51624	0.0148976	0.118397	1	2177	tags=38%, list=19%, signal=47%
CHR10Q24	CHR10Q24		63	0.434648	1.51525	0.0189394	0.119271	1	1325	tags=22%, list=11%, signal=25%
MORF_ANP32B	MORF_ANP32B		189	0.362027	1.51422	0	0.120178	1	2614	tags=37%, list=23%, signal=46%
GSE24634_TEFF_VS_TCONV_DAY3_IN_CULTURE_UP	GSE24634_TEFF_VS_TCONV_DAY3_IN_CULTURE_UP		178	0.365841	1.5129	0.00166945	0.12133	1	2602	tags=37%, list=22%, signal=47%
CHR2P22	CHR2P22		30	0.503027	1.51266	0.037594	0.121376	1	1793	tags=33%, list=15%, signal=39%
GSE2405_HEAT_KILLED_LYSATE_VS_LIVE_A_PHAGOCYTOPHILUM_STIM_NEUTROPHIL_9H_UP	GSE2405_HEAT_KILLED_LYSATE_VS_LIVE_A_PHAGOCYTOPHILUM_STIM_NEUTROPHIL_9H_UP		143	0.369342	1.51243	0.00562852	0.121406	1	2311	tags=31%, list=20%, signal=39%
GO_REGULATION_OF_CHROMOSOME_SEGREGATION	GO_REGULATION_OF_CHROMOSOME_SEGREGATION		69	0.419984	1.51238	0.0087108	0.121278	1	2335	tags=43%, list=20%, signal=54%
KEEN_RESPONSE_TO_ROSIGLITAZONE_UP	KEEN_RESPONSE_TO_ROSIGLITAZONE_UP		28	0.502346	1.51158	0.0340909	0.121957	1	1817	tags=32%, list=16%, signal=38%
GO_MITOTIC_G2_M_TRANSITION_CHECKPOINT	GO_MITOTIC_G2_M_TRANSITION_CHECKPOINT		15	0.589356	1.50943	0.0573013	0.124096	1	2394	tags=73%, list=21%, signal=92%
REACTOME_CD28_DEPENDENT_PI3K_AKT_SIGNALING	REACTOME_CD28_DEPENDENT_PI3K_AKT_SIGNALING		19	0.5516	1.50901	0.0393996	0.124335	1	1991	tags=32%, list=17%, signal=38%
GSE14000_4H_VS_16H_LPS_DC_DN	GSE14000_4H_VS_16H_LPS_DC_DN		174	0.366383	1.50894	0.00509338	0.124207	1	2511	tags=34%, list=22%, signal=43%
GSE14350_TREG_VS_TEFF_IN_IL2RB_KO_DN	GSE14350_TREG_VS_TEFF_IN_IL2RB_KO_DN		115	0.381712	1.50888	0.0107527	0.124079	1	2253	tags=31%, list=19%, signal=38%
GO_RNA_3_END_PROCESSING	GO_RNA_3_END_PROCESSING		86	0.401634	1.50808	0.0127042	0.124786	1	2053	tags=26%, list=18%, signal=31%
GSE22611_NOD2_TRANSD_VS_CTRL_TRANSD_HEK293_MDP_STIM_2H_DN	GSE22611_NOD2_TRANSD_VS_CTRL_TRANSD_HEK293_MDP_STIM_2H_DN		29	0.498707	1.50737	0.0275229	0.125327	1	1957	tags=31%, list=17%, signal=37%
HU_GENOTOXIC_DAMAGE_4HR	HU_GENOTOXIC_DAMAGE_4HR		34	0.489869	1.50688	0.0323194	0.12565	1	2028	tags=38%, list=18%, signal=46%
GO_SPLICEOSOMAL_TRI_SNRNP_COMPLEX	GO_SPLICEOSOMAL_TRI_SNRNP_COMPLEX		23	0.532689	1.50665	0.035514	0.125677	1	2412	tags=48%, list=21%, signal=60%
GSE5589_IL6_KO_VS_IL10_KO_LPS_AND_IL6_STIM_MACROPHAGE_45MIN_UP	GSE5589_IL6_KO_VS_IL10_KO_LPS_AND_IL6_STIM_MACROPHAGE_45MIN_UP		157	0.369621	1.50563	0.00516351	0.126603	1	2721	tags=38%, list=23%, signal=48%
FINETTI_BREAST_CANCER_KINOME_RED	FINETTI_BREAST_CANCER_KINOME_RED		16	0.570165	1.50505	0.0464646	0.127032	1	3230	tags=63%, list=28%, signal=87%
MODULE_18	MODULE_18		330	0.336908	1.50471	0.00168067	0.127201	1	2440	tags=34%, list=21%, signal=41%
GSE5503_MLN_DC_VS_SPLEEN_DC_ACTIVATED_ALLOGENIC_TCELL_DN	GSE5503_MLN_DC_VS_SPLEEN_DC_ACTIVATED_ALLOGENIC_TCELL_DN		160	0.368075	1.50455	0.00352734	0.127183	1	2259	tags=32%, list=20%, signal=39%
GOLDRATH_NAIVE_VS_EFF_CD8_TCELL_DN	GOLDRATH_NAIVE_VS_EFF_CD8_TCELL_DN		174	0.364251	1.50432	0.0035524	0.127269	1	1652	tags=28%, list=14%, signal=32%
GSE7568_IL4_VS_IL4_AND_DEXAMETHASONE_TREATED_MACROPHAGE_UP	GSE7568_IL4_VS_IL4_AND_DEXAMETHASONE_TREATED_MACROPHAGE_UP		149	0.369668	1.50361	0.00352113	0.127842	1	2337	tags=32%, list=20%, signal=40%
GO_CHROMATIN_DNA_BINDING	GO_CHROMATIN_DNA_BINDING		60	0.428672	1.50361	0.0166052	0.127658	1	1997	tags=32%, list=17%, signal=38%
GO_RIBONUCLEOPROTEIN_COMPLEX_BIOGENESIS	GO_RIBONUCLEOPROTEIN_COMPLEX_BIOGENESIS		395	0.331076	1.50359	0	0.127491	1	2816	tags=32%, list=24%, signal=41%
GO_NEGATIVE_REGULATION_OF_PROTEIN_CATABOLIC_PROCESS	GO_NEGATIVE_REGULATION_OF_PROTEIN_CATABOLIC_PROCESS		78	0.41259	1.50322	0.00560748	0.127724	1	2007	tags=33%, list=17%, signal=40%
GSE22432_MULTIPOTENT_PROGENITOR_VS_PDC_DN	GSE22432_MULTIPOTENT_PROGENITOR_VS_PDC_DN		154	0.372951	1.50321	0.00177936	0.127544	1	2666	tags=35%, list=23%, signal=45%
GSE43955_TGFB_IL6_VS_TGFB_IL6_IL23_TH17_ACT_CD4_TCELL_52H_UP	GSE43955_TGFB_IL6_VS_TGFB_IL6_IL23_TH17_ACT_CD4_TCELL_52H_UP		132	0.378663	1.5031	0.00720721	0.127477	1	2566	tags=33%, list=22%, signal=41%
MODULE_397	MODULE_397		94	0.398603	1.50125	0.00531915	0.129328	1	2878	tags=41%, list=25%, signal=55%
GSE25123_CTRL_VS_IL4_STIM_PPARG_KO_MACROPHAGE_UP	GSE25123_CTRL_VS_IL4_STIM_PPARG_KO_MACROPHAGE_UP		124	0.382641	1.50125	0.0070922	0.129145	1	2836	tags=36%, list=24%, signal=48%
MODULE_438	MODULE_438		35	0.479017	1.50086	0.0181159	0.129397	1	2551	tags=40%, list=22%, signal=51%
GSE6674_ANTI_IGM_VS_CPG_STIM_BCELL_UP	GSE6674_ANTI_IGM_VS_CPG_STIM_BCELL_UP		161	0.362682	1.49987	0.0017301	0.130264	1	2728	tags=34%, list=24%, signal=44%
BIDUS_METASTASIS_UP	BIDUS_METASTASIS_UP		188	0.359116	1.49979	0.00490196	0.130157	1	2798	tags=36%, list=24%, signal=47%
KEGG_NUCLEOTIDE_EXCISION_REPAIR	KEGG_NUCLEOTIDE_EXCISION_REPAIR		42	0.456387	1.49868	0.02693	0.131149	1	2237	tags=40%, list=19%, signal=50%
GO_U2_SNRNP	GO_U2_SNRNP		16	0.572906	1.49759	0.0357143	0.132179	1	2625	tags=56%, list=23%, signal=73%
GO_G2_DNA_DAMAGE_CHECKPOINT	GO_G2_DNA_DAMAGE_CHECKPOINT		29	0.486017	1.49755	0.0438931	0.13203	1	2394	tags=59%, list=21%, signal=74%
GLI1_UP.V1_UP	GLI1_UP.V1_UP		19	0.551787	1.49742	0.0403071	0.131992	1	3645	tags=53%, list=31%, signal=77%
GSE14769_UNSTIM_VS_80MIN_LPS_BMDM_UP	GSE14769_UNSTIM_VS_80MIN_LPS_BMDM_UP		162	0.364324	1.49666	0.00539568	0.132615	1	1658	tags=22%, list=14%, signal=25%
GSE27786_LIN_NEG_VS_NKTCELL_UP	GSE27786_LIN_NEG_VS_NKTCELL_UP		153	0.36852	1.49631	0.00362976	0.132807	1	2144	tags=31%, list=19%, signal=37%
MORF_RAD23A	MORF_RAD23A		330	0.336874	1.4948	0	0.134373	1	2344	tags=29%, list=20%, signal=35%
THILLAINADESAN_ZNF217_TARGETS_UP	THILLAINADESAN_ZNF217_TARGETS_UP		38	0.466015	1.49478	0.0167286	0.134192	1	2845	tags=47%, list=25%, signal=63%
GSE27859_DC_VS_CD11C_INT_F480_HI_MACROPHAGE_UP	GSE27859_DC_VS_CD11C_INT_F480_HI_MACROPHAGE_UP		173	0.363368	1.49474	0	0.134057	1	2613	tags=32%, list=23%, signal=40%
HASLINGER_B_CLL_WITH_6Q21_DELETION	HASLINGER_B_CLL_WITH_6Q21_DELETION		16	0.568622	1.49372	0.03861	0.134994	1	1594	tags=44%, list=14%, signal=51%
ODONNELL_TARGETS_OF_MYC_AND_TFRC_DN	ODONNELL_TARGETS_OF_MYC_AND_TFRC_DN		39	0.468789	1.49341	0.0338078	0.135135	1	2190	tags=46%, list=19%, signal=57%
SHEPARD_BMYB_MORPHOLINO_DN	SHEPARD_BMYB_MORPHOLINO_DN		128	0.376774	1.49284	0.00862069	0.135565	1	2230	tags=34%, list=19%, signal=41%
MORF_DAP3	MORF_DAP3		185	0.358349	1.49157	0.00169491	0.136869	1	1805	tags=25%, list=16%, signal=30%
GO_INTRAMOLECULAR_TRANSFERASE_ACTIVITY	GO_INTRAMOLECULAR_TRANSFERASE_ACTIVITY		24	0.514393	1.49047	0.0406654	0.137961	1	1208	tags=29%, list=10%, signal=32%
GO_TELOMERE_MAINTENANCE_VIA_TELOMERASE	GO_TELOMERE_MAINTENANCE_VIA_TELOMERASE		15	0.582354	1.48994	0.0478012	0.138352	1	2235	tags=60%, list=19%, signal=74%
VANHARANTA_UTERINE_FIBROID_WITH_7Q_DELETION_UP	VANHARANTA_UTERINE_FIBROID_WITH_7Q_DELETION_UP		58	0.427861	1.4896	0.0197842	0.13856	1	1716	tags=29%, list=15%, signal=34%
GGAANCGGAANY_UNKNOWN	GGAANCGGAANY_UNKNOWN		94	0.395008	1.48912	0.018315	0.13896	1	2770	tags=36%, list=24%, signal=47%
PRC2_EED_UP.V1_DN	PRC2_EED_UP.V1_DN		138	0.372717	1.48876	0.0107914	0.139203	1	1207	tags=19%, list=10%, signal=21%
GARY_CD5_TARGETS_DN	GARY_CD5_TARGETS_DN		393	0.330309	1.48709	0	0.141008	1	3063	tags=37%, list=26%, signal=49%
GSE8685_IL2_STARVED_VS_IL2_ACT_IL2_STARVED_CD4_TCELL_DN	GSE8685_IL2_STARVED_VS_IL2_ACT_IL2_STARVED_CD4_TCELL_DN		155	0.366032	1.48685	0.0108499	0.141103	1	2611	tags=36%, list=23%, signal=46%
GCM_RBM8A	GCM_RBM8A		69	0.42035	1.48619	0.0167598	0.14172	1	2711	tags=39%, list=23%, signal=51%
GO_RIBONUCLEOPROTEIN_COMPLEX_LOCALIZATION	GO_RIBONUCLEOPROTEIN_COMPLEX_LOCALIZATION		106	0.380296	1.48512	0.00732601	0.142777	1	2900	tags=32%, list=25%, signal=42%
GO_ANAPHASE_PROMOTING_COMPLEX	GO_ANAPHASE_PROMOTING_COMPLEX		17	0.563604	1.48493	0.0474453	0.142799	1	2335	tags=47%, list=20%, signal=59%
GSE28726_NAIVE_CD4_TCELL_VS_NAIVE_VA24NEG_NKTCELL_UP	GSE28726_NAIVE_CD4_TCELL_VS_NAIVE_VA24NEG_NKTCELL_UP		184	0.358923	1.48489	0.00175439	0.142642	1	2180	tags=33%, list=19%, signal=40%
GSE3982_MEMORY_CD4_TCELL_VS_TH2_DN	GSE3982_MEMORY_CD4_TCELL_VS_TH2_DN		173	0.357344	1.4848	0.00175439	0.142546	1	1811	tags=33%, list=16%, signal=38%
HOUSTIS_ROS	HOUSTIS_ROS		27	0.50144	1.48399	0.0392857	0.143323	1	990	tags=19%, list=9%, signal=20%
GO_ERROR_FREE_TRANSLESION_SYNTHESIS	GO_ERROR_FREE_TRANSLESION_SYNTHESIS		18	0.555049	1.48357	0.0595668	0.143619	1	2948	tags=56%, list=25%, signal=74%
YU_MYC_TARGETS_UP	YU_MYC_TARGETS_UP		38	0.468271	1.4832	0.0245614	0.143844	1	2975	tags=66%, list=26%, signal=88%
LEE_LIVER_CANCER_SURVIVAL_DN	LEE_LIVER_CANCER_SURVIVAL_DN		155	0.364599	1.48315	0.00549451	0.143715	1	1652	tags=25%, list=14%, signal=29%
SASAKI_ADULT_T_CELL_LEUKEMIA	SASAKI_ADULT_T_CELL_LEUKEMIA		155	0.364835	1.48198	0.00347826	0.144937	1	2338	tags=35%, list=20%, signal=43%
MAYBURD_RESPONSE_TO_L663536_UP	MAYBURD_RESPONSE_TO_L663536_UP		21	0.521584	1.48188	0.0438931	0.144871	1	2529	tags=33%, list=22%, signal=43%
CHUNG_BLISTER_CYTOTOXICITY_DN	CHUNG_BLISTER_CYTOTOXICITY_DN		34	0.47941	1.48175	0.0311927	0.144806	1	614	tags=18%, list=5%, signal=19%
REACTOME_FORMATION_OF_RNA_POL_II_ELONGATION_COMPLEX_	REACTOME_FORMATION_OF_RNA_POL_II_ELONGATION_COMPLEX_		39	0.466039	1.48092	0.0327273	0.14567	1	2766	tags=46%, list=24%, signal=60%
ZHONG_RESPONSE_TO_AZACITIDINE_AND_TSA_DN	ZHONG_RESPONSE_TO_AZACITIDINE_AND_TSA_DN		60	0.41583	1.48073	0.0196464	0.145707	1	2466	tags=38%, list=21%, signal=48%
KEGG_PROGESTERONE_MEDIATED_OOCYTE_MATURATION	KEGG_PROGESTERONE_MEDIATED_OOCYTE_MATURATION		63	0.417251	1.48051	0.023766	0.145754	1	2448	tags=38%, list=21%, signal=48%
GO_NUCLEAR_IMPORT	GO_NUCLEAR_IMPORT		104	0.383751	1.48045	0.00914077	0.145614	1	1248	tags=18%, list=11%, signal=20%
GSE3982_EFF_MEMORY_CD4_TCELL_VS_TH2_DN	GSE3982_EFF_MEMORY_CD4_TCELL_VS_TH2_DN		184	0.356221	1.48024	0.00336134	0.145691	1	2064	tags=34%, list=18%, signal=40%
GNF2_UBE2I	GNF2_UBE2I		43	0.455379	1.48023	0.0263653	0.145492	1	2590	tags=42%, list=22%, signal=54%
GO_HYALURONAN_METABOLIC_PROCESS	GO_HYALURONAN_METABOLIC_PROCESS		15	0.567491	1.47978	0.0625	0.14583	1	2541	tags=40%, list=22%, signal=51%
GSE21546_WT_VS_SAP1A_KO_DP_THYMOCYTES_DN	GSE21546_WT_VS_SAP1A_KO_DP_THYMOCYTES_DN		105	0.37788	1.4788	0.00881834	0.146789	1	1865	tags=27%, list=16%, signal=31%
GO_PROTEIN_HETERODIMERIZATION_ACTIVITY	GO_PROTEIN_HETERODIMERIZATION_ACTIVITY		290	0.336276	1.47856	0	0.146873	1	1951	tags=27%, list=17%, signal=32%
GO_DICARBOXYLIC_ACID_TRANSPORT	GO_DICARBOXYLIC_ACID_TRANSPORT		31	0.474703	1.47854	0.0333952	0.146696	1	642	tags=16%, list=6%, signal=17%
GO_TRANSCRIPTION_ELONGATION_FROM_RNA_POLYMERASE_II_PROMOTER	GO_TRANSCRIPTION_ELONGATION_FROM_RNA_POLYMERASE_II_PROMOTER		72	0.403079	1.47842	0.0190641	0.14665	1	3278	tags=44%, list=28%, signal=62%
GO_TELOMERASE_HOLOENZYME_COMPLEX	GO_TELOMERASE_HOLOENZYME_COMPLEX		15	0.565739	1.47706	0.0615942	0.148186	1	1750	tags=53%, list=15%, signal=63%
GO_VITAMIN_BINDING	GO_VITAMIN_BINDING		38	0.456655	1.47687	0.0383944	0.148226	1	1139	tags=24%, list=10%, signal=26%
NADERI_BREAST_CANCER_PROGNOSIS_UP	NADERI_BREAST_CANCER_PROGNOSIS_UP		31	0.476859	1.47662	0.0445736	0.148344	1	3230	tags=45%, list=28%, signal=62%
GSE12366_GC_VS_NAIVE_BCELL_UP	GSE12366_GC_VS_NAIVE_BCELL_UP		168	0.358884	1.47501	0.00694444	0.150102	1	2997	tags=42%, list=26%, signal=55%
KAECH_DAY8_EFF_VS_MEMORY_CD8_TCELL_UP	KAECH_DAY8_EFF_VS_MEMORY_CD8_TCELL_UP		177	0.356401	1.47495	0	0.149962	1	1652	tags=27%, list=14%, signal=31%
GO_SNRNA_BINDING	GO_SNRNA_BINDING		32	0.471365	1.47482	0.0419708	0.149931	1	2482	tags=44%, list=21%, signal=56%
REACTOME_MITOTIC_G2_G2_M_PHASES	REACTOME_MITOTIC_G2_G2_M_PHASES		71	0.405241	1.47447	0.0222635	0.150162	1	2120	tags=32%, list=18%, signal=39%
GO_SULFUR_COMPOUND_TRANSPORT	GO_SULFUR_COMPOUND_TRANSPORT		15	0.580194	1.47447	0.0556701	0.149965	1	1766	tags=33%, list=15%, signal=39%
GO_DNA_TEMPLATED_TRANSCRIPTION_TERMINATION	GO_DNA_TEMPLATED_TRANSCRIPTION_TERMINATION		93	0.395572	1.47423	0.00723327	0.150066	1	2237	tags=30%, list=19%, signal=37%
GSE26156_DOUBLE_POSITIVE_VS_CD4_SINGLE_POSITIVE_THYMOCYTE_DN	GSE26156_DOUBLE_POSITIVE_VS_CD4_SINGLE_POSITIVE_THYMOCYTE_DN		187	0.349947	1.47381	0	0.15037	1	2201	tags=32%, list=19%, signal=39%
GSE3720_VD1_VS_VD2_GAMMADELTA_TCELL_WITH_LPS_STIM_DN	GSE3720_VD1_VS_VD2_GAMMADELTA_TCELL_WITH_LPS_STIM_DN		163	0.356252	1.4734	0.00892857	0.150676	1	1840	tags=28%, list=16%, signal=32%
GO_DNA_BIOSYNTHETIC_PROCESS	GO_DNA_BIOSYNTHETIC_PROCESS		99	0.388168	1.47232	0.0218182	0.151868	1	2235	tags=40%, list=19%, signal=50%
GSE31082_DP_VS_CD4_SP_THYMOCYTE_UP	GSE31082_DP_VS_CD4_SP_THYMOCYTE_UP		165	0.35463	1.47175	0.00521739	0.152368	1	2357	tags=30%, list=20%, signal=37%
GSE26488_HDAC7_KO_VS_VP16_TRANSGENIC_HDAC7_KO_DOUBLE_POSITIVE_THYMOCYTE_UP	GSE26488_HDAC7_KO_VS_VP16_TRANSGENIC_HDAC7_KO_DOUBLE_POSITIVE_THYMOCYTE_UP		102	0.385262	1.47153	0.0145719	0.152418	1	2210	tags=31%, list=19%, signal=38%
GCAAGGA_MIR502	GCAAGGA_MIR502		51	0.433841	1.47145	0.0183486	0.152332	1	1749	tags=29%, list=15%, signal=34%
TGTYNNNNNRGCARM_UNKNOWN	TGTYNNNNNRGCARM_UNKNOWN		49	0.441053	1.47131	0.0422794	0.152309	1	1134	tags=27%, list=10%, signal=29%
GO_AMINO_ACID_TRANSMEMBRANE_TRANSPORTER_ACTIVITY	GO_AMINO_ACID_TRANSMEMBRANE_TRANSPORTER_ACTIVITY		33	0.473435	1.47039	0.0446097	0.153234	1	1219	tags=21%, list=11%, signal=24%
BLUM_RESPONSE_TO_SALIRASIB_DN	BLUM_RESPONSE_TO_SALIRASIB_DN		303	0.336288	1.47017	0	0.153282	1	2449	tags=34%, list=21%, signal=42%
MORF_IL16	MORF_IL16		117	0.372019	1.4699	0.0036036	0.153411	1	2646	tags=33%, list=23%, signal=43%
GSE2405_0H_VS_12H_A_PHAGOCYTOPHILUM_STIM_NEUTROPHIL_DN	GSE2405_0H_VS_12H_A_PHAGOCYTOPHILUM_STIM_NEUTROPHIL_DN		132	0.36672	1.46966	0.00557621	0.153501	1	1635	tags=24%, list=14%, signal=28%
GSE11961_FOLLICULAR_BCELL_VS_MARGINAL_ZONE_BCELL_UP	GSE11961_FOLLICULAR_BCELL_VS_MARGINAL_ZONE_BCELL_UP		117	0.374095	1.46945	0.0109689	0.153565	1	2199	tags=29%, list=19%, signal=36%
GSE46606_UNSTIM_VS_CD40L_IL2_IL5_DAY1_STIMULATED_BCELL_UP	GSE46606_UNSTIM_VS_CD40L_IL2_IL5_DAY1_STIMULATED_BCELL_UP		148	0.36223	1.46904	0.00542496	0.153847	1	2319	tags=30%, list=20%, signal=38%
MORF_MDM2	MORF_MDM2		113	0.375759	1.46864	0.0110294	0.154155	1	2516	tags=27%, list=22%, signal=35%
GSE34156_NOD2_LIGAND_VS_TLR1_TLR2_LIGAND_24H_TREATED_MONOCYTE_DN	GSE34156_NOD2_LIGAND_VS_TLR1_TLR2_LIGAND_24H_TREATED_MONOCYTE_DN		153	0.366038	1.46858	0.00695652	0.15401	1	2855	tags=34%, list=25%, signal=45%
GNF2_G22P1	GNF2_G22P1		35	0.471726	1.46814	0.0407407	0.154353	1	2358	tags=40%, list=20%, signal=50%
MORF_PSMC1	MORF_PSMC1		184	0.34817	1.46751	0.0034662	0.155009	1	2480	tags=33%, list=21%, signal=42%
MODULE_115	MODULE_115		27	0.498266	1.46733	0.0520231	0.155014	1	2102	tags=41%, list=18%, signal=50%
GSE46606_UNSTIM_VS_CD40L_IL2_IL5_DAY3_STIMULATED_BCELL_UP	GSE46606_UNSTIM_VS_CD40L_IL2_IL5_DAY3_STIMULATED_BCELL_UP		133	0.365004	1.46637	0.0102215	0.156069	1	2084	tags=26%, list=18%, signal=31%
GSE16385_ROSIGLITAZONE_IL4_VS_ROSIGLITAZONE_ALONE_STIM_MACROPHAGE_DN	GSE16385_ROSIGLITAZONE_IL4_VS_ROSIGLITAZONE_ALONE_STIM_MACROPHAGE_DN		166	0.356239	1.46624	0.00749064	0.156028	1	1542	tags=24%, list=13%, signal=27%
GSE25147_UNSTIM_VS_HELIOBACTER_PYLORI_LPS_STIM_MKN45_CELL_UP	GSE25147_UNSTIM_VS_HELIOBACTER_PYLORI_LPS_STIM_MKN45_CELL_UP		121	0.365782	1.46574	0.0131086	0.156451	1	1703	tags=22%, list=15%, signal=26%
GSE46606_IRF4_KO_VS_WT_CD40L_IL2_IL5_3DAY_STIMULATED_BCELL_DN	GSE46606_IRF4_KO_VS_WT_CD40L_IL2_IL5_3DAY_STIMULATED_BCELL_DN		138	0.365573	1.46562	0.00520833	0.156404	1	1117	tags=17%, list=10%, signal=19%
MORF_ACP1	MORF_ACP1		199	0.345747	1.46505	0	0.156909	1	2851	tags=37%, list=25%, signal=48%
GO_TRANSLESION_SYNTHESIS	GO_TRANSLESION_SYNTHESIS		33	0.462085	1.46378	0.0390335	0.158341	1	2970	tags=55%, list=26%, signal=73%
REACTOME_FORMATION_OF_TRANSCRIPTION_COUPLED_NER_TC_NER_REPAIR_COMPLEX	REACTOME_FORMATION_OF_TRANSCRIPTION_COUPLED_NER_TC_NER_REPAIR_COMPLEX		28	0.490963	1.46373	0.0477064	0.158191	1	2685	tags=50%, list=23%, signal=65%
GSE21670_STAT3_KO_VS_WT_CD4_TCELL_IL6_TREATED_DN	GSE21670_STAT3_KO_VS_WT_CD4_TCELL_IL6_TREATED_DN		125	0.366304	1.46327	0.00554529	0.158578	1	1003	tags=17%, list=9%, signal=18%
MORF_KDR	MORF_KDR		30	0.480633	1.46178	0.0418251	0.1603	1	2018	tags=30%, list=17%, signal=36%
GSE33424_CD161_HIGH_VS_NEG_CD8_TCELL_DN	GSE33424_CD161_HIGH_VS_NEG_CD8_TCELL_DN		148	0.362954	1.4615	0.0070922	0.160436	1	2035	tags=31%, list=18%, signal=37%
GO_TRANSLATION_INITIATION_FACTOR_BINDING	GO_TRANSLATION_INITIATION_FACTOR_BINDING		24	0.505764	1.46148	0.0458891	0.160246	1	621	tags=21%, list=5%, signal=22%
GSE22611_NOD2_VS_MUTANT_NOD2_TRANSDUCED_HEK293T_CELL_DN	GSE22611_NOD2_VS_MUTANT_NOD2_TRANSDUCED_HEK293T_CELL_DN		94	0.389301	1.4613	0.0157618	0.160263	1	1118	tags=19%, list=10%, signal=21%
GO_HIPPO_SIGNALING	GO_HIPPO_SIGNALING		18	0.546916	1.46107	0.0625	0.160348	1	2485	tags=33%, list=21%, signal=42%
GO_BAF_TYPE_COMPLEX	GO_BAF_TYPE_COMPLEX		17	0.540927	1.46088	0.040146	0.160409	1	3827	tags=65%, list=33%, signal=97%
MORF_ATF2	MORF_ATF2		138	0.36651	1.45992	0.0126354	0.161446	1	2113	tags=24%, list=18%, signal=29%
BOYAULT_LIVER_CANCER_SUBCLASS_G6_UP	BOYAULT_LIVER_CANCER_SUBCLASS_G6_UP		45	0.438338	1.45964	0.0347222	0.161624	1	2758	tags=40%, list=24%, signal=52%
GSE3982_MAST_CELL_VS_DC_UP	GSE3982_MAST_CELL_VS_DC_UP		138	0.363261	1.45888	0.00546448	0.162434	1	2434	tags=28%, list=21%, signal=35%
GO_MIDBODY	GO_MIDBODY		113	0.372547	1.4583	0.00549451	0.162982	1	1859	tags=27%, list=16%, signal=31%
GSE11961_MEMORY_BCELL_DAY40_VS_GERMINAL_CENTER_BCELL_DAY40_UP	GSE11961_MEMORY_BCELL_DAY40_VS_GERMINAL_CENTER_BCELL_DAY40_UP		115	0.371915	1.45751	0.0175131	0.163853	1	2944	tags=35%, list=25%, signal=46%
GO_MRNA_3_END_PROCESSING	GO_MRNA_3_END_PROCESSING		64	0.411746	1.4572	0.0227671	0.164043	1	1075	tags=17%, list=9%, signal=19%
GO_MRNA_CLEAVAGE_FACTOR_COMPLEX	GO_MRNA_CLEAVAGE_FACTOR_COMPLEX		16	0.549636	1.45709	0.0740038	0.163999	1	2017	tags=44%, list=17%, signal=53%
GO_CAJAL_BODY	GO_CAJAL_BODY		44	0.431649	1.45706	0.0319716	0.163824	1	2397	tags=36%, list=21%, signal=46%
GO_PSEUDOURIDINE_SYNTHESIS	GO_PSEUDOURIDINE_SYNTHESIS		17	0.547305	1.45615	0.0625	0.16482	1	1208	tags=35%, list=10%, signal=39%
GSE3982_BASOPHIL_VS_TH2_DN	GSE3982_BASOPHIL_VS_TH2_DN		159	0.359655	1.45579	0.00990099	0.165081	1	2213	tags=33%, list=19%, signal=41%
GCM_DDX11	GCM_DDX11		36	0.461263	1.45578	0.0409253	0.164885	1	1425	tags=22%, list=12%, signal=25%
MORF_RPA2	MORF_RPA2		175	0.35046	1.45551	0.00525394	0.165026	1	2864	tags=37%, list=25%, signal=49%
BROWNE_HCMV_INFECTION_12HR_DN	BROWNE_HCMV_INFECTION_12HR_DN		62	0.415887	1.45549	0.0344828	0.164833	1	950	tags=21%, list=8%, signal=23%
GSE2128_C57BL6_VS_NOD_THYMOCYTE_MIMETOPE_NEGATIVE_SELECTION_UP	GSE2128_C57BL6_VS_NOD_THYMOCYTE_MIMETOPE_NEGATIVE_SELECTION_UP		93	0.387791	1.45498	0.0243902	0.165277	1	2324	tags=31%, list=20%, signal=39%
GAVIN_FOXP3_TARGETS_CLUSTER_T7	GAVIN_FOXP3_TARGETS_CLUSTER_T7		91	0.387296	1.45482	0.0164234	0.165269	1	2602	tags=35%, list=22%, signal=45%
GSE22886_NEUTROPHIL_VS_MONOCYTE_UP	GSE22886_NEUTROPHIL_VS_MONOCYTE_UP		69	0.406797	1.45342	0.0163636	0.167	1	1656	tags=25%, list=14%, signal=29%
RYTGCNNRGNAAC_MIF1_01	RYTGCNNRGNAAC_MIF1_01		51	0.431939	1.45302	0.0224299	0.167351	1	1109	tags=22%, list=10%, signal=24%
GSE3982_EOSINOPHIL_VS_TH2_DN	GSE3982_EOSINOPHIL_VS_TH2_DN		172	0.352878	1.45245	0.0111111	0.167932	1	2349	tags=34%, list=20%, signal=42%
GSE26030_TH1_VS_TH17_RESTIMULATED_DAY15_POST_POLARIZATION_UP	GSE26030_TH1_VS_TH17_RESTIMULATED_DAY15_POST_POLARIZATION_UP		148	0.355895	1.45235	0.0163339	0.167872	1	1271	tags=22%, list=11%, signal=24%
GO_POSITIVE_REGULATION_OF_TELOMERE_MAINTENANCE	GO_POSITIVE_REGULATION_OF_TELOMERE_MAINTENANCE		41	0.441038	1.45226	0.0322581	0.167766	1	1785	tags=39%, list=15%, signal=46%
GO_REGULATION_OF_PROTEIN_COMPLEX_DISASSEMBLY	GO_REGULATION_OF_PROTEIN_COMPLEX_DISASSEMBLY		159	0.354117	1.4522	0.00526316	0.167633	1	3155	tags=42%, list=27%, signal=57%
GO_METHYLATED_HISTONE_BINDING	GO_METHYLATED_HISTONE_BINDING		42	0.448742	1.45217	0.0478012	0.16746	1	1469	tags=29%, list=13%, signal=33%
GO_NEGATIVE_REGULATION_OF_CELL_CYCLE_PROCESS	GO_NEGATIVE_REGULATION_OF_CELL_CYCLE_PROCESS		173	0.350028	1.45216	0.00342466	0.167255	1	2650	tags=37%, list=23%, signal=47%
GO_REGULATION_OF_MICROTUBULE_POLYMERIZATION_OR_DEPOLYMERIZATION	GO_REGULATION_OF_MICROTUBULE_POLYMERIZATION_OR_DEPOLYMERIZATION		137	0.359392	1.45178	0.00891266	0.167533	1	2188	tags=34%, list=19%, signal=42%
GO_ANTIMICROBIAL_HUMORAL_RESPONSE	GO_ANTIMICROBIAL_HUMORAL_RESPONSE		18	0.536955	1.45175	0.0506823	0.167348	1	170	tags=17%, list=1%, signal=17%
BOYAULT_LIVER_CANCER_SUBCLASS_G3_UP	BOYAULT_LIVER_CANCER_SUBCLASS_G3_UP		176	0.352964	1.45153	0.00515464	0.167435	1	2614	tags=36%, list=23%, signal=46%
GSE7219_WT_VS_NIK_NFKB2_KO_DC_DN	GSE7219_WT_VS_NIK_NFKB2_KO_DC_DN		135	0.360988	1.45119	0.00364299	0.167717	1	2214	tags=33%, list=19%, signal=40%
GO_INTERSTRAND_CROSS_LINK_REPAIR	GO_INTERSTRAND_CROSS_LINK_REPAIR		33	0.462388	1.45109	0.047532	0.167633	1	2821	tags=42%, list=24%, signal=56%
MORF_PPP1CC	MORF_PPP1CC		156	0.355346	1.45025	0.00866551	0.168545	1	1779	tags=26%, list=15%, signal=30%
GSE3982_CTRL_VS_PMA_STIM_EOSINOPHIL_UP	GSE3982_CTRL_VS_PMA_STIM_EOSINOPHIL_UP		151	0.360133	1.44943	0.00550459	0.169453	1	2072	tags=28%, list=18%, signal=34%
MORF_MLLT10	MORF_MLLT10		130	0.365097	1.44881	0.00862069	0.170113	1	2113	tags=25%, list=18%, signal=30%
GSE18148_CBFB_KO_VS_WT_TREG_DN	GSE18148_CBFB_KO_VS_WT_TREG_DN		91	0.383238	1.44829	0.0235935	0.170607	1	2276	tags=34%, list=20%, signal=42%
GSE18791_CTRL_VS_NEWCASTLE_VIRUS_DC_10H_UP	GSE18791_CTRL_VS_NEWCASTLE_VIRUS_DC_10H_UP		165	0.35407	1.44806	0.00682594	0.170709	1	2650	tags=33%, list=23%, signal=43%
GSE5589_LPS_VS_LPS_AND_IL10_STIM_MACROPHAGE_45MIN_DN	GSE5589_LPS_VS_LPS_AND_IL10_STIM_MACROPHAGE_45MIN_DN		139	0.360136	1.44805	0.00888099	0.170517	1	1124	tags=19%, list=10%, signal=20%
GSE18203_CTRL_VS_INTRATUMORAL_CPG_INJ_MC38_TUMOR_DN	GSE18203_CTRL_VS_INTRATUMORAL_CPG_INJ_MC38_TUMOR_DN		170	0.348553	1.44721	0.00862069	0.171492	1	1962	tags=26%, list=17%, signal=31%
RPS14_DN.V1_DN	RPS14_DN.V1_DN		132	0.361267	1.44716	0.00356506	0.171341	1	1328	tags=25%, list=11%, signal=28%
GSE43863_TH1_VS_LY6C_LOW_CXCR5NEG_EFFECTOR_CD4_TCELL_UP	GSE43863_TH1_VS_LY6C_LOW_CXCR5NEG_EFFECTOR_CD4_TCELL_UP		177	0.349861	1.44715	0.005291	0.171151	1	2478	tags=34%, list=21%, signal=42%
GSE13547_CTRL_VS_ANTI_IGM_STIM_BCELL_2H_UP	GSE13547_CTRL_VS_ANTI_IGM_STIM_BCELL_2H_UP		153	0.35767	1.44691	0.00684931	0.171272	1	2203	tags=36%, list=19%, signal=44%
REACTOME_SIGNALING_BY_HIPPO	REACTOME_SIGNALING_BY_HIPPO		15	0.559989	1.44687	0.0705009	0.171117	1	2485	tags=40%, list=21%, signal=51%
LINDGREN_BLADDER_CANCER_CLUSTER_1_DN	LINDGREN_BLADDER_CANCER_CLUSTER_1_DN		282	0.329797	1.44675	0.00357782	0.171045	1	2386	tags=30%, list=21%, signal=37%
GSE15659_RESTING_TREG_VS_NONSUPPRESSIVE_TCELL_UP	GSE15659_RESTING_TREG_VS_NONSUPPRESSIVE_TCELL_UP		88	0.383029	1.44545	0.0223048	0.17265	1	2345	tags=30%, list=20%, signal=37%
NFY_Q6_01	NFY_Q6_01		192	0.343122	1.4447	0.00350263	0.173477	1	1901	tags=26%, list=16%, signal=30%
GO_REGULATION_OF_DNA_REPLICATION	GO_REGULATION_OF_DNA_REPLICATION		117	0.364585	1.44407	0.0165441	0.174153	1	1785	tags=32%, list=15%, signal=38%
GO_NEGATIVE_REGULATION_OF_PROTEIN_COMPLEX_DISASSEMBLY	GO_NEGATIVE_REGULATION_OF_PROTEIN_COMPLEX_DISASSEMBLY		122	0.363296	1.44402	0.0191939	0.174008	1	3155	tags=44%, list=27%, signal=60%
GO_HISTONE_H4_ACETYLATION	GO_HISTONE_H4_ACETYLATION		36	0.452176	1.44347	0.0655738	0.174568	1	2910	tags=39%, list=25%, signal=52%
HEIDENBLAD_AMPLICON_8Q24_UP	HEIDENBLAD_AMPLICON_8Q24_UP		31	0.476207	1.44195	0.0519713	0.176468	1	2918	tags=42%, list=25%, signal=56%
BROWNE_HCMV_INFECTION_14HR_DN	BROWNE_HCMV_INFECTION_14HR_DN		206	0.340977	1.44175	0.00172414	0.17654	1	1889	tags=25%, list=16%, signal=29%
GO_DNA_DOUBLE_STRAND_BREAK_PROCESSING	GO_DNA_DOUBLE_STRAND_BREAK_PROCESSING		19	0.527413	1.44155	0.0619308	0.176584	1	2203	tags=47%, list=19%, signal=58%
GNF2_MLH1	GNF2_MLH1		41	0.445125	1.44118	0.0272727	0.176908	1	2650	tags=51%, list=23%, signal=66%
REACTOME_CELL_CYCLE_CHECKPOINTS	REACTOME_CELL_CYCLE_CHECKPOINTS		104	0.372217	1.44108	0.0111732	0.17684	1	2335	tags=33%, list=20%, signal=41%
GARGALOVIC_RESPONSE_TO_OXIDIZED_PHOSPHOLIPIDS_TURQUOISE_DN	GARGALOVIC_RESPONSE_TO_OXIDIZED_PHOSPHOLIPIDS_TURQUOISE_DN		47	0.426142	1.44092	0.0465549	0.176824	1	2994	tags=43%, list=26%, signal=57%
GSE14415_TCONV_VS_FOXP3_KO_INDUCED_TREG_UP	GSE14415_TCONV_VS_FOXP3_KO_INDUCED_TREG_UP		144	0.355594	1.43976	0.00357143	0.178265	1	1431	tags=24%, list=12%, signal=27%
MORF_RAD51L3	MORF_RAD51L3		153	0.354444	1.43968	0.00722022	0.178166	1	2516	tags=27%, list=22%, signal=35%
GO_XENOPHAGY	GO_XENOPHAGY		72	0.395549	1.43945	0.0231317	0.178283	1	1951	tags=24%, list=17%, signal=28%
GO_DYNEIN_BINDING	GO_DYNEIN_BINDING		16	0.553316	1.43875	0.0803738	0.179097	1	3129	tags=50%, list=27%, signal=68%
GSE7568_IL4_TGFB_DEXAMETHASONE_VS_IL4_TGFB_TREATED_MACROPHAGE_UP	GSE7568_IL4_TGFB_DEXAMETHASONE_VS_IL4_TGFB_TREATED_MACROPHAGE_UP		154	0.351051	1.43817	0.00513699	0.179712	1	2703	tags=34%, list=23%, signal=43%
GO_CUL3_RING_UBIQUITIN_LIGASE_COMPLEX	GO_CUL3_RING_UBIQUITIN_LIGASE_COMPLEX		38	0.455933	1.43816	0.0502793	0.179521	1	2285	tags=32%, list=20%, signal=39%
REACTOME_RNA_POL_III_TRANSCRIPTION_INITIATION_FROM_TYPE_2_PROMOTER	REACTOME_RNA_POL_III_TRANSCRIPTION_INITIATION_FROM_TYPE_2_PROMOTER		21	0.518221	1.43771	0.0689013	0.179883	1	2685	tags=57%, list=23%, signal=74%
WAKASUGI_HAVE_ZNF143_BINDING_SITES	WAKASUGI_HAVE_ZNF143_BINDING_SITES		52	0.426825	1.43766	0.0415162	0.179735	1	2197	tags=37%, list=19%, signal=45%
GO_NEGATIVE_REGULATION_OF_ORGANELLE_ORGANIZATION	GO_NEGATIVE_REGULATION_OF_ORGANELLE_ORGANIZATION		294	0.32459	1.43754	0.00502513	0.179722	1	3267	tags=40%, list=28%, signal=55%
GO_REGULATION_OF_CELL_CYCLE_PROCESS	GO_REGULATION_OF_CELL_CYCLE_PROCESS		418	0.314473	1.4369	0	0.180377	1	2442	tags=31%, list=21%, signal=37%
GSE15930_NAIVE_VS_48H_IN_VITRO_STIM_IL12_CD8_TCELL_DN	GSE15930_NAIVE_VS_48H_IN_VITRO_STIM_IL12_CD8_TCELL_DN		176	0.342772	1.43618	0.0104712	0.181201	1	2420	tags=30%, list=21%, signal=37%
MORF_XRCC5	MORF_XRCC5		221	0.332572	1.43524	0.00179211	0.182346	1	2910	tags=34%, list=25%, signal=45%
GO_NEGATIVE_REGULATION_OF_MACROAUTOPHAGY	GO_NEGATIVE_REGULATION_OF_MACROAUTOPHAGY		19	0.531377	1.43516	0.0721063	0.182241	1	1144	tags=32%, list=10%, signal=35%
GSE2128_C57BL6_VS_NOD_THYMOCYTE_UP	GSE2128_C57BL6_VS_NOD_THYMOCYTE_UP		158	0.352154	1.4347	0.00347222	0.18268	1	3230	tags=39%, list=28%, signal=54%
GSE22443_IL2_VS_IL12_TREATED_ACT_CD8_TCELL_UP	GSE22443_IL2_VS_IL12_TREATED_ACT_CD8_TCELL_UP		98	0.37938	1.4342	0.0144404	0.183167	1	2046	tags=29%, list=18%, signal=34%
IVANOVA_HEMATOPOIESIS_STEM_CELL_LONG_TERM	IVANOVA_HEMATOPOIESIS_STEM_CELL_LONG_TERM		180	0.340591	1.43326	0.00542496	0.184333	1	989	tags=15%, list=9%, signal=16%
GCM_ING1	GCM_ING1		59	0.407551	1.43323	0.0217786	0.184147	1	1152	tags=17%, list=10%, signal=19%
TARTE_PLASMA_CELL_VS_PLASMABLAST_DN	TARTE_PLASMA_CELL_VS_PLASMABLAST_DN		296	0.323599	1.43315	0.00178891	0.184043	1	2481	tags=32%, list=21%, signal=39%
GO_NON_RECOMBINATIONAL_REPAIR	GO_NON_RECOMBINATIONAL_REPAIR		61	0.4099	1.43313	0.0238971	0.183835	1	2203	tags=33%, list=19%, signal=40%
REACTOME_TRANSPORT_OF_INORGANIC_CATIONS_ANIONS_AND_AMINO_ACIDS_OLIGOPEPTIDES	REACTOME_TRANSPORT_OF_INORGANIC_CATIONS_ANIONS_AND_AMINO_ACIDS_OLIGOPEPTIDES		43	0.43949	1.43203	0.0490909	0.185273	1	2131	tags=35%, list=18%, signal=43%
GO_NUCLEAR_REPLICATION_FORK	GO_NUCLEAR_REPLICATION_FORK		38	0.447315	1.4319	0.0554562	0.185248	1	3073	tags=47%, list=27%, signal=64%
GO_POSITIVE_REGULATION_OF_DNA_REPAIR	GO_POSITIVE_REGULATION_OF_DNA_REPAIR		28	0.485018	1.43185	0.0381679	0.185093	1	1323	tags=29%, list=11%, signal=32%
MORF_BMPR2	MORF_BMPR2		23	0.506682	1.4312	0.0603291	0.185834	1	1533	tags=30%, list=13%, signal=35%
GSE27786_LSK_VS_NKCELL_UP	GSE27786_LSK_VS_NKCELL_UP		147	0.3551	1.43101	0.00346021	0.185923	1	1863	tags=25%, list=16%, signal=30%
GO_ORGANIC_ANION_TRANSMEMBRANE_TRANSPORTER_ACTIVITY	GO_ORGANIC_ANION_TRANSMEMBRANE_TRANSPORTER_ACTIVITY		76	0.389076	1.43078	0.035514	0.186042	1	1219	tags=17%, list=11%, signal=19%
CHRXP11	CHRXP11		81	0.387711	1.43013	0.0161871	0.186808	1	2194	tags=31%, list=19%, signal=38%
GNF2_MLF1	GNF2_MLF1		22	0.502877	1.43009	0.0689655	0.186635	1	1932	tags=41%, list=17%, signal=49%
GO_NCRNA_METABOLIC_PROCESS	GO_NCRNA_METABOLIC_PROCESS		467	0.310191	1.42965	0	0.187049	1	2807	tags=30%, list=24%, signal=38%
GSE10239_MEMORY_VS_KLRG1INT_EFF_CD8_TCELL_DN	GSE10239_MEMORY_VS_KLRG1INT_EFF_CD8_TCELL_DN		171	0.343608	1.42932	0.00859107	0.187366	1	3152	tags=40%, list=27%, signal=54%
GO_NEGATIVE_REGULATION_OF_CHROMOSOME_ORGANIZATION	GO_NEGATIVE_REGULATION_OF_CHROMOSOME_ORGANIZATION		82	0.388571	1.4289	0.0179211	0.187787	1	2645	tags=38%, list=23%, signal=49%
GO_CENTRIOLAR_SATELLITE	GO_CENTRIOLAR_SATELLITE		17	0.532309	1.42826	0.0778985	0.188509	1	2137	tags=53%, list=18%, signal=65%
GSE40274_CTRL_VS_FOXP3_AND_XBP1_TRANSDUCED_ACTIVATED_CD4_TCELL_UP	GSE40274_CTRL_VS_FOXP3_AND_XBP1_TRANSDUCED_ACTIVATED_CD4_TCELL_UP		129	0.359738	1.42772	0.0093633	0.189117	1	3074	tags=42%, list=27%, signal=56%
GSE16451_CTRL_VS_WEST_EQUINE_ENC_VIRUS_IMMATURE_NEURON_CELL_LINE_DN	GSE16451_CTRL_VS_WEST_EQUINE_ENC_VIRUS_IMMATURE_NEURON_CELL_LINE_DN		167	0.351197	1.42756	0.005386	0.189117	1	2545	tags=36%, list=22%, signal=45%
GO_REGULATION_OF_TELOMERE_MAINTENANCE_VIA_TELOMERE_LENGTHENING	GO_REGULATION_OF_TELOMERE_MAINTENANCE_VIA_TELOMERE_LENGTHENING		44	0.43775	1.42746	0.0474383	0.18901	1	1785	tags=39%, list=15%, signal=46%
KEGG_NEUROACTIVE_LIGAND_RECEPTOR_INTERACTION	KEGG_NEUROACTIVE_LIGAND_RECEPTOR_INTERACTION		67	0.399461	1.42729	0.0199637	0.189039	1	955	tags=15%, list=8%, signal=16%
MORF_TERF1	MORF_TERF1		63	0.408817	1.42667	0.0326296	0.189749	1	2059	tags=33%, list=18%, signal=40%
KEGG_OOCYTE_MEIOSIS	KEGG_OOCYTE_MEIOSIS		83	0.392943	1.42618	0.019084	0.190329	1	3230	tags=45%, list=28%, signal=61%
GO_REGULATION_OF_DEFENSE_RESPONSE_TO_VIRUS_BY_HOST	GO_REGULATION_OF_DEFENSE_RESPONSE_TO_VIRUS_BY_HOST		95	0.377558	1.42599	0.0263653	0.19041	1	2372	tags=29%, list=20%, signal=37%
KANNAN_TP53_TARGETS_UP	KANNAN_TP53_TARGETS_UP		45	0.42666	1.42587	0.0453686	0.190349	1	882	tags=22%, list=8%, signal=24%
GO_MICROTUBULE_ORGANIZING_CENTER_ORGANIZATION	GO_MICROTUBULE_ORGANIZING_CENTER_ORGANIZATION		69	0.39795	1.42582	0.0383212	0.19019	1	2165	tags=33%, list=19%, signal=41%
GO_MISMATCH_REPAIR	GO_MISMATCH_REPAIR		27	0.488855	1.42505	0.0365631	0.191123	1	2886	tags=48%, list=25%, signal=64%
MODULE_149	MODULE_149		36	0.448966	1.4245	0.0576923	0.191727	1	2102	tags=33%, list=18%, signal=41%
REACTOME_RNA_POL_III_TRANSCRIPTION	REACTOME_RNA_POL_III_TRANSCRIPTION		31	0.458352	1.42424	0.0534653	0.191886	1	2869	tags=48%, list=25%, signal=64%
MORF_CD8A	MORF_CD8A		36	0.4481	1.42397	0.0569745	0.192073	1	1092	tags=17%, list=9%, signal=18%
WELCSH_BRCA1_TARGETS_DN	WELCSH_BRCA1_TARGETS_DN		128	0.356358	1.4238	0.0139373	0.192133	1	2997	tags=35%, list=26%, signal=47%
PENG_GLUCOSE_DEPRIVATION_DN	PENG_GLUCOSE_DEPRIVATION_DN		137	0.355306	1.42349	0.0198915	0.192387	1	2884	tags=39%, list=25%, signal=52%
WINNEPENNINCKX_MELANOMA_METASTASIS_DN	WINNEPENNINCKX_MELANOMA_METASTASIS_DN		26	0.488666	1.42309	0.0532319	0.19276	1	71	tags=8%, list=1%, signal=8%
GYORFFY_DOXORUBICIN_RESISTANCE	GYORFFY_DOXORUBICIN_RESISTANCE		23	0.49635	1.42299	0.06814	0.192674	1	2996	tags=52%, list=26%, signal=70%
GO_SPLICEOSOMAL_COMPLEX_ASSEMBLY	GO_SPLICEOSOMAL_COMPLEX_ASSEMBLY		48	0.421363	1.42182	0.0364299	0.19423	1	2417	tags=42%, list=21%, signal=52%
LI_PROSTATE_CANCER_EPIGENETIC	LI_PROSTATE_CANCER_EPIGENETIC		17	0.540581	1.42181	0.0809859	0.194024	1	2735	tags=53%, list=24%, signal=69%
BIOCARTA_ATRBRCA_PATHWAY	BIOCARTA_ATRBRCA_PATHWAY		17	0.531482	1.42169	0.0884477	0.193984	1	3648	tags=53%, list=32%, signal=77%
GO_REGULATION_OF_TRANSCRIPTION_ELONGATION_FROM_RNA_POLYMERASE_II_PROMOTER	GO_REGULATION_OF_TRANSCRIPTION_ELONGATION_FROM_RNA_POLYMERASE_II_PROMOTER		19	0.513702	1.42163	0.0735294	0.193838	1	3278	tags=47%, list=28%, signal=66%
WEIGEL_OXIDATIVE_STRESS_BY_TBH_AND_H2O2	WEIGEL_OXIDATIVE_STRESS_BY_TBH_AND_H2O2		30	0.469076	1.42102	0.0613383	0.194537	1	2387	tags=43%, list=21%, signal=54%
GO_POSITIVE_REGULATION_OF_VIRAL_TRANSCRIPTION	GO_POSITIVE_REGULATION_OF_VIRAL_TRANSCRIPTION		32	0.463047	1.41986	0.0569745	0.196134	1	1014	tags=22%, list=9%, signal=24%
GSE2770_TGFB_AND_IL4_VS_IL12_TREATED_ACT_CD4_TCELL_6H_DN	GSE2770_TGFB_AND_IL4_VS_IL12_TREATED_ACT_CD4_TCELL_6H_DN		167	0.344758	1.41927	0.00927644	0.19678	1	2186	tags=31%, list=19%, signal=37%
GSE11386_NAIVE_VS_MEMORY_BCELL_UP	GSE11386_NAIVE_VS_MEMORY_BCELL_UP		161	0.347111	1.41921	0.005291	0.196664	1	1370	tags=21%, list=12%, signal=24%
CHR10Q26	CHR10Q26		43	0.429739	1.41863	0.0311927	0.197382	1	1842	tags=37%, list=16%, signal=44%
GO_PROTEIN_SUMOYLATION	GO_PROTEIN_SUMOYLATION		103	0.373576	1.41821	0.0243056	0.197789	1	2660	tags=34%, list=23%, signal=44%
GO_ION_ANTIPORTER_ACTIVITY	GO_ION_ANTIPORTER_ACTIVITY		22	0.511597	1.41791	0.0556586	0.198003	1	1923	tags=36%, list=17%, signal=44%
GSE19941_IL10_KO_VS_IL10_KO_AND_NFKBP50_KO_LPS_AND_IL10_STIM_MACROPHAGE_DN	GSE19941_IL10_KO_VS_IL10_KO_AND_NFKBP50_KO_LPS_AND_IL10_STIM_MACROPHAGE_DN		131	0.356111	1.41723	0.0174216	0.198863	1	3181	tags=40%, list=27%, signal=55%
HERNANDEZ_MITOTIC_ARREST_BY_DOCETAXEL_2_UP	HERNANDEZ_MITOTIC_ARREST_BY_DOCETAXEL_2_UP		40	0.437245	1.41706	0.0497238	0.198915	1	1553	tags=30%, list=13%, signal=35%
GSE22886_CD8_VS_CD4_NAIVE_TCELL_UP	GSE22886_CD8_VS_CD4_NAIVE_TCELL_UP		169	0.339586	1.4168	0.0160714	0.19913	1	1650	tags=22%, list=14%, signal=25%
GSE12963_ENV_NEF_VS_ENV_NEF_AND_VPR_DEFICIENT_HIV1_INF_CD4_TCELL_DN	GSE12963_ENV_NEF_VS_ENV_NEF_AND_VPR_DEFICIENT_HIV1_INF_CD4_TCELL_DN		93	0.374614	1.41636	0.0304659	0.199546	1	3008	tags=39%, list=26%, signal=52%
IWANAGA_E2F1_TARGETS_INDUCED_BY_SERUM	IWANAGA_E2F1_TARGETS_INDUCED_BY_SERUM		24	0.480139	1.41627	0.0639535	0.199475	1	2311	tags=46%, list=20%, signal=57%
GO_REGULATION_OF_SISTER_CHROMATID_SEGREGATION	GO_REGULATION_OF_SISTER_CHROMATID_SEGREGATION		55	0.419783	1.41606	0.0502793	0.19961	1	2335	tags=45%, list=20%, signal=57%
PRAMOONJAGO_SOX4_TARGETS_DN	PRAMOONJAGO_SOX4_TARGETS_DN		44	0.428543	1.41579	0.0476191	0.199814	1	840	tags=25%, list=7%, signal=27%
GO_MICROTUBULE_CYTOSKELETON_ORGANIZATION	GO_MICROTUBULE_CYTOSKELETON_ORGANIZATION		230	0.330662	1.41508	0.00510204	0.200682	1	2188	tags=30%, list=19%, signal=36%
BIOCARTA_EIF_PATHWAY	BIOCARTA_EIF_PATHWAY		16	0.545887	1.415	0.0742115	0.20058	1	1805	tags=25%, list=16%, signal=30%
GSE37532_TREG_VS_TCONV_CD4_TCELL_FROM_VISCERAL_ADIPOSE_TISSUE_DN	GSE37532_TREG_VS_TCONV_CD4_TCELL_FROM_VISCERAL_ADIPOSE_TISSUE_DN		147	0.350277	1.41499	0.00896057	0.200361	1	2165	tags=27%, list=19%, signal=33%
GSE4748_CTRL_VS_CYANOBACTERIUM_LPSLIKE_STIM_DC_1H_DN	GSE4748_CTRL_VS_CYANOBACTERIUM_LPSLIKE_STIM_DC_1H_DN		131	0.353468	1.41449	0.0165138	0.200906	1	1321	tags=19%, list=11%, signal=21%
MODULE_196	MODULE_196		19	0.531558	1.41441	0.0749543	0.200816	1	2635	tags=58%, list=23%, signal=75%
GSE7218_UNSTIM_VS_ANTIGEN_STIM_THROUGH_IGG_BCELL_UP	GSE7218_UNSTIM_VS_ANTIGEN_STIM_THROUGH_IGG_BCELL_UP		152	0.343483	1.41437	0.0131579	0.200646	1	2264	tags=29%, list=20%, signal=36%
GNF2_DEK	GNF2_DEK		56	0.40984	1.41376	0.0497427	0.201367	1	2749	tags=43%, list=24%, signal=56%
GSE17721_CPG_VS_GARDIQUIMOD_0.5H_BMDC_UP	GSE17721_CPG_VS_GARDIQUIMOD_0.5H_BMDC_UP		128	0.355136	1.41347	0.00899281	0.201579	1	1869	tags=27%, list=16%, signal=31%
KAUFFMANN_DNA_REPLICATION_GENES	KAUFFMANN_DNA_REPLICATION_GENES		121	0.358734	1.4132	0.0230906	0.201759	1	2987	tags=46%, list=26%, signal=62%
MODULE_253	MODULE_253		18	0.52204	1.4131	0.0900563	0.201706	1	2635	tags=56%, list=23%, signal=72%
GSE18791_CTRL_VS_NEWCASTLE_VIRUS_DC_18H_UP	GSE18791_CTRL_VS_NEWCASTLE_VIRUS_DC_18H_UP		170	0.341921	1.41286	0.0154374	0.201881	1	2838	tags=35%, list=25%, signal=46%
GO_U2_TYPE_SPLICEOSOMAL_COMPLEX	GO_U2_TYPE_SPLICEOSOMAL_COMPLEX		26	0.480689	1.41262	0.0872727	0.202036	1	2768	tags=54%, list=24%, signal=71%
GO_POSITIVE_REGULATION_OF_CELL_CYCLE_PROCESS	GO_POSITIVE_REGULATION_OF_CELL_CYCLE_PROCESS		169	0.340766	1.41162	0.0193322	0.203424	1	2335	tags=31%, list=20%, signal=39%
GO_PROTEIN_OLIGOMERIZATION	GO_PROTEIN_OLIGOMERIZATION		286	0.323029	1.41055	0.00495868	0.204923	1	1961	tags=23%, list=17%, signal=27%
GSE14308_TH2_VS_INDUCED_TREG_DN	GSE14308_TH2_VS_INDUCED_TREG_DN		150	0.346394	1.4099	0.0169173	0.205706	1	2294	tags=27%, list=20%, signal=34%
GSE9988_LPS_VS_LOW_LPS_MONOCYTE_UP	GSE9988_LPS_VS_LOW_LPS_MONOCYTE_UP		73	0.389678	1.40966	0.0447761	0.20586	1	2486	tags=37%, list=21%, signal=47%
GSE15930_NAIVE_VS_48H_IN_VITRO_STIM_IFNAB_CD8_TCELL_DN	GSE15930_NAIVE_VS_48H_IN_VITRO_STIM_IFNAB_CD8_TCELL_DN		184	0.337836	1.40952	0.0122164	0.205831	1	3056	tags=36%, list=26%, signal=48%
GSE14415_INDUCED_TREG_VS_FAILED_INDUCED_TREG_UP	GSE14415_INDUCED_TREG_VS_FAILED_INDUCED_TREG_UP		171	0.341098	1.40891	0.00927644	0.206558	1	2851	tags=38%, list=25%, signal=50%
GSE8621_LPS_PRIMED_UNSTIM_VS_LPS_PRIMED_AND_LPS_STIM_MACROPHAGE_DN	GSE8621_LPS_PRIMED_UNSTIM_VS_LPS_PRIMED_AND_LPS_STIM_MACROPHAGE_DN		160	0.344766	1.40848	0.017331	0.207011	1	1591	tags=21%, list=14%, signal=24%
GO_SAGA_TYPE_COMPLEX	GO_SAGA_TYPE_COMPLEX		27	0.476322	1.40783	0.0651341	0.207791	1	3268	tags=59%, list=28%, signal=82%
GSE12003_4D_VS_8D_CULTURE_MIR223_KO_BM_PROGENITOR_DN	GSE12003_4D_VS_8D_CULTURE_MIR223_KO_BM_PROGENITOR_DN		135	0.346013	1.4065	0.0140105	0.209804	1	2844	tags=34%, list=25%, signal=45%
GO_EXONUCLEASE_ACTIVITY_ACTIVE_WITH_EITHER_RIBO_OR_DEOXYRIBONUCLEIC_ACIDS_AND_PRODUCING_5_PHOSPHOMONOESTERS	GO_EXONUCLEASE_ACTIVITY_ACTIVE_WITH_EITHER_RIBO_OR_DEOXYRIBONUCLEIC_ACIDS_AND_PRODUCING_5_PHOSPHOMONOESTERS		38	0.438275	1.40614	0.0508475	0.210204	1	2940	tags=37%, list=25%, signal=49%
GO_HISTONE_H3_K4_METHYLATION	GO_HISTONE_H3_K4_METHYLATION		22	0.498257	1.40598	0.0802239	0.21024	1	2863	tags=45%, list=25%, signal=60%
GSE7460_CTRL_VS_FOXP3_OVEREXPR_TCONV_1_UP	GSE7460_CTRL_VS_FOXP3_OVEREXPR_TCONV_1_UP		114	0.355642	1.40591	0.0233813	0.21012	1	2182	tags=26%, list=19%, signal=32%
GSE6674_ANTI_IGM_VS_PL2_3_STIM_BCELL_UP	GSE6674_ANTI_IGM_VS_PL2_3_STIM_BCELL_UP		165	0.34484	1.40575	0.00548446	0.210168	1	1339	tags=20%, list=12%, signal=22%
GSE7460_CD8_TCELL_VS_TREG_ACT_DN	GSE7460_CD8_TCELL_VS_TREG_ACT_DN		160	0.341842	1.40521	0.0183824	0.210835	1	2417	tags=30%, list=21%, signal=37%
REACTOME_LOSS_OF_NLP_FROM_MITOTIC_CENTROSOMES	REACTOME_LOSS_OF_NLP_FROM_MITOTIC_CENTROSOMES		51	0.420295	1.40499	0.0501792	0.210973	1	2120	tags=33%, list=18%, signal=41%
GSE15659_NAIVE_CD4_TCELL_VS_RESTING_TREG_UP	GSE15659_NAIVE_CD4_TCELL_VS_RESTING_TREG_UP		115	0.357892	1.40484	0.0175439	0.21099	1	1776	tags=29%, list=15%, signal=34%
MORF_BRCA1	MORF_BRCA1		169	0.343048	1.40453	0.0183028	0.211293	1	2113	tags=28%, list=18%, signal=34%
GSE25087_FETAL_VS_ADULT_TCONV_DN	GSE25087_FETAL_VS_ADULT_TCONV_DN		128	0.355323	1.40445	0.0296296	0.211201	1	1962	tags=25%, list=17%, signal=30%
BOHN_PRIMARY_IMMUNODEFICIENCY_SYNDROM_UP	BOHN_PRIMARY_IMMUNODEFICIENCY_SYNDROM_UP		42	0.431512	1.40399	0.0584906	0.211716	1	2087	tags=33%, list=18%, signal=41%
GO_NUCLEOLAR_PART	GO_NUCLEOLAR_PART		54	0.407169	1.4031	0.0418251	0.212898	1	3217	tags=43%, list=28%, signal=59%
GSE41176_WT_VS_TAK1_KO_UNSTIM_BCELL_DN	GSE41176_WT_VS_TAK1_KO_UNSTIM_BCELL_DN		61	0.40054	1.40282	0.0394737	0.213116	1	1970	tags=25%, list=17%, signal=29%
MARKS_HDAC_TARGETS_UP	MARKS_HDAC_TARGETS_UP		19	0.524376	1.40261	0.0865385	0.21327	1	69	tags=11%, list=1%, signal=11%
GO_ANION_CHANNEL_ACTIVITY	GO_ANION_CHANNEL_ACTIVITY		26	0.472732	1.40138	0.082243	0.215023	1	1604	tags=27%, list=14%, signal=31%
GSE22432_MULTIPOTENT_VS_COMMON_DC_PROGENITOR_UP	GSE22432_MULTIPOTENT_VS_COMMON_DC_PROGENITOR_UP		156	0.343739	1.40081	0.0188034	0.215711	1	1710	tags=22%, list=15%, signal=25%
LASTOWSKA_COAMPLIFIED_WITH_MYCN	LASTOWSKA_COAMPLIFIED_WITH_MYCN		25	0.480977	1.40035	0.0613718	0.216225	1	2522	tags=32%, list=22%, signal=41%
GO_NUCLEOTIDE_EXCISION_REPAIR_DNA_GAP_FILLING	GO_NUCLEOTIDE_EXCISION_REPAIR_DNA_GAP_FILLING		23	0.497572	1.40019	0.0883978	0.216275	1	1926	tags=48%, list=17%, signal=57%
GO_NCRNA_PROCESSING	GO_NCRNA_PROCESSING		346	0.312333	1.40018	0.00331126	0.216057	1	2807	tags=30%, list=24%, signal=38%
GO_SMN_SM_PROTEIN_COMPLEX	GO_SMN_SM_PROTEIN_COMPLEX		15	0.535133	1.39975	0.0948905	0.216547	1	2141	tags=27%, list=18%, signal=33%
GO_SUPRAMOLECULAR_FIBER	GO_SUPRAMOLECULAR_FIBER		341	0.315885	1.39967	0.00165563	0.216454	1	2188	tags=26%, list=19%, signal=31%
GSE43863_NAIVE_VS_LY6C_INT_CXCR5POS_CD4_EFF_TCELL_D6_LCMV_UP	GSE43863_NAIVE_VS_LY6C_INT_CXCR5POS_CD4_EFF_TCELL_D6_LCMV_UP		135	0.34879	1.39933	0.024735	0.216786	1	1692	tags=21%, list=15%, signal=24%
OCT1_02	OCT1_02		89	0.376802	1.39885	0.0277778	0.217364	1	2311	tags=31%, list=20%, signal=39%
GSE27786_LIN_NEG_VS_MONO_MAC_UP	GSE27786_LIN_NEG_VS_MONO_MAC_UP		172	0.336974	1.39866	0.010989	0.217474	1	2588	tags=33%, list=22%, signal=42%
GO_POSITIVE_REGULATION_OF_TELOMERE_MAINTENANCE_VIA_TELOMERE_LENGTHENING	GO_POSITIVE_REGULATION_OF_TELOMERE_MAINTENANCE_VIA_TELOMERE_LENGTHENING		28	0.469134	1.39754	0.0735294	0.21904	1	1785	tags=43%, list=15%, signal=51%
GO_NUCLEAR_UBIQUITIN_LIGASE_COMPLEX	GO_NUCLEAR_UBIQUITIN_LIGASE_COMPLEX		35	0.439596	1.39731	0.0678571	0.219201	1	2335	tags=40%, list=20%, signal=50%
REACTOME_RNA_POL_II_PRE_TRANSCRIPTION_EVENTS	REACTOME_RNA_POL_II_PRE_TRANSCRIPTION_EVENTS		54	0.412845	1.39696	0.0564972	0.21956	1	2766	tags=39%, list=24%, signal=51%
MODULE_447	MODULE_447		31	0.455918	1.39692	0.0783582	0.219389	1	1779	tags=35%, list=15%, signal=42%
GSE20152_SPHK1_KO_VS_HTNFA_OVEREXPRESS_ANKLE_DN	GSE20152_SPHK1_KO_VS_HTNFA_OVEREXPRESS_ANKLE_DN		151	0.344751	1.39597	0.0175747	0.220808	1	3006	tags=35%, list=26%, signal=47%
GCM_ACTG1	GCM_ACTG1		120	0.352824	1.39562	0.0224138	0.221126	1	1779	tags=23%, list=15%, signal=26%
GSE16450_CTRL_VS_IFNA_12H_STIM_IMMATURE_NEURON_CELL_LINE_DN	GSE16450_CTRL_VS_IFNA_12H_STIM_IMMATURE_NEURON_CELL_LINE_DN		109	0.363921	1.39528	0.025	0.221427	1	2212	tags=28%, list=19%, signal=34%
GNF2_ANP32B	GNF2_ANP32B		35	0.442771	1.39496	0.0502901	0.221718	1	2466	tags=51%, list=21%, signal=65%
GO_DEACETYLASE_ACTIVITY	GO_DEACETYLASE_ACTIVITY		44	0.423002	1.39447	0.0605536	0.222298	1	634	tags=16%, list=5%, signal=17%
GSE2770_TGFB_AND_IL4_ACT_VS_ACT_CD4_TCELL_6H_DN	GSE2770_TGFB_AND_IL4_ACT_VS_ACT_CD4_TCELL_6H_DN		165	0.337485	1.39389	0.0121317	0.223021	1	2952	tags=38%, list=25%, signal=50%
GO_KERATINOCYTE_DIFFERENTIATION	GO_KERATINOCYTE_DIFFERENTIATION		33	0.45124	1.39284	0.0652174	0.224546	1	2027	tags=21%, list=18%, signal=26%
GSE3720_UNSTIM_VS_PMA_STIM_VD2_GAMMADELTA_TCELL_DN	GSE3720_UNSTIM_VS_PMA_STIM_VD2_GAMMADELTA_TCELL_DN		157	0.340774	1.39246	0.00869565	0.224967	1	2820	tags=32%, list=24%, signal=42%
GSE3982_NKCELL_VS_TH2_DN	GSE3982_NKCELL_VS_TH2_DN		173	0.337712	1.3919	0.0171527	0.225646	1	2495	tags=35%, list=22%, signal=44%
GO_SPINDLE_MIDZONE	GO_SPINDLE_MIDZONE		21	0.497452	1.39139	0.0938086	0.226261	1	1858	tags=52%, list=16%, signal=62%
GO_CELL_CELL_ADHESION_VIA_PLASMA_MEMBRANE_ADHESION_MOLECULES	GO_CELL_CELL_ADHESION_VIA_PLASMA_MEMBRANE_ADHESION_MOLECULES		48	0.418811	1.39113	0.0547703	0.226428	1	1571	tags=25%, list=14%, signal=29%
DACOSTA_ERCC3_ALLELE_XPCS_VS_TTD_DN	DACOSTA_ERCC3_ALLELE_XPCS_VS_TTD_DN		21	0.501919	1.39078	0.0796296	0.226777	1	996	tags=24%, list=9%, signal=26%
GO_MICROTUBULE	GO_MICROTUBULE		263	0.318958	1.38999	0.00670017	0.227918	1	2188	tags=27%, list=19%, signal=33%
GO_ATP_DEPENDENT_DNA_HELICASE_ACTIVITY	GO_ATP_DEPENDENT_DNA_HELICASE_ACTIVITY		32	0.455165	1.38995	0.0685921	0.227751	1	2237	tags=38%, list=19%, signal=46%
GO_PROTEIN_LOCALIZATION_TO_NUCLEUS	GO_PROTEIN_LOCALIZATION_TO_NUCLEUS		118	0.351571	1.38994	0.0212014	0.227515	1	1248	tags=16%, list=11%, signal=18%
REACTOME_RNA_POL_III_CHAIN_ELONGATION	REACTOME_RNA_POL_III_CHAIN_ELONGATION		16	0.529304	1.38952	0.10397	0.228018	1	2685	tags=56%, list=23%, signal=73%
JAEGER_METASTASIS_UP	JAEGER_METASTASIS_UP		27	0.461794	1.38914	0.0612613	0.228402	1	1325	tags=33%, list=11%, signal=38%
GSE23321_CD8_STEM_CELL_MEMORY_VS_CENTRAL_MEMORY_CD8_TCELL_DN	GSE23321_CD8_STEM_CELL_MEMORY_VS_CENTRAL_MEMORY_CD8_TCELL_DN		158	0.341532	1.38881	0.00722022	0.228728	1	2867	tags=34%, list=25%, signal=44%
MORF_GNB1	MORF_GNB1		289	0.313334	1.38863	0.00167785	0.228823	1	2449	tags=29%, list=21%, signal=36%
GO_POSITIVE_REGULATION_OF_DNA_METABOLIC_PROCESS	GO_POSITIVE_REGULATION_OF_DNA_METABOLIC_PROCESS		132	0.351933	1.38849	0.025974	0.228813	1	1785	tags=29%, list=15%, signal=34%
GSE15330_MEGAKARYOCYTE_ERYTHROID_VS_GRANULOCYTE_MONOCYTE_PROGENITOR_IKAROS_KO_UP	GSE15330_MEGAKARYOCYTE_ERYTHROID_VS_GRANULOCYTE_MONOCYTE_PROGENITOR_IKAROS_KO_UP		168	0.337308	1.3883	0.0145985	0.228908	1	2134	tags=24%, list=18%, signal=29%
GSE41867_DAY8_VS_DAY15_LCMV_CLONE13_EFFECTOR_CD8_TCELL_DN	GSE41867_DAY8_VS_DAY15_LCMV_CLONE13_EFFECTOR_CD8_TCELL_DN		165	0.333539	1.38645	0.0127273	0.231895	1	1940	tags=24%, list=17%, signal=29%
GSE22886_NAIVE_TCELL_VS_NEUTROPHIL_UP	GSE22886_NAIVE_TCELL_VS_NEUTROPHIL_UP		181	0.336227	1.38585	0.0173611	0.232735	1	2371	tags=30%, list=20%, signal=37%
GSE17974_CTRL_VS_ACT_IL4_AND_ANTI_IL12_24H_CD4_TCELL_DN	GSE17974_CTRL_VS_ACT_IL4_AND_ANTI_IL12_24H_CD4_TCELL_DN		167	0.33571	1.38567	0.019573	0.232835	1	2419	tags=31%, list=21%, signal=39%
STK33_DN	STK33_DN		177	0.33214	1.38562	0.0122378	0.232663	1	1619	tags=21%, list=14%, signal=24%
ALCALAY_AML_BY_NPM1_LOCALIZATION_DN	ALCALAY_AML_BY_NPM1_LOCALIZATION_DN		151	0.34229	1.38539	0.0156794	0.232822	1	1249	tags=21%, list=11%, signal=23%
GO_SPINDLE_ASSEMBLY	GO_SPINDLE_ASSEMBLY		57	0.40117	1.38536	0.0604982	0.232623	1	2321	tags=37%, list=20%, signal=46%
GO_NEUTRAL_AMINO_ACID_TRANSPORT	GO_NEUTRAL_AMINO_ACID_TRANSPORT		17	0.518299	1.38531	0.10989	0.232464	1	805	tags=24%, list=7%, signal=25%
GSE22601_DOUBLE_POSITIVE_VS_CD8_SINGLE_POSITIVE_THYMOCYTE_DN	GSE22601_DOUBLE_POSITIVE_VS_CD8_SINGLE_POSITIVE_THYMOCYTE_DN		173	0.336868	1.38502	0.0136986	0.232715	1	1967	tags=28%, list=17%, signal=34%
BARRIER_CANCER_RELAPSE_NORMAL_SAMPLE_UP	BARRIER_CANCER_RELAPSE_NORMAL_SAMPLE_UP		24	0.484532	1.38492	0.0887246	0.23266	1	1696	tags=42%, list=15%, signal=49%
TMTCGCGANR_UNKNOWN	TMTCGCGANR_UNKNOWN		143	0.348629	1.38483	0.0246914	0.232578	1	2050	tags=25%, list=18%, signal=30%
MORF_MAGEA9	MORF_MAGEA9		176	0.334059	1.38482	0.00679117	0.232348	1	2516	tags=26%, list=22%, signal=33%
GCM_MLL	GCM_MLL		154	0.343457	1.3846	0.0223464	0.232519	1	3082	tags=37%, list=27%, signal=50%
MATTIOLI_MGUS_VS_PCL	MATTIOLI_MGUS_VS_PCL		88	0.365671	1.38407	0.0396396	0.233192	1	2495	tags=36%, list=22%, signal=46%
GO_PYRIMIDINE_NUCLEOTIDE_BIOSYNTHETIC_PROCESS	GO_PYRIMIDINE_NUCLEOTIDE_BIOSYNTHETIC_PROCESS		23	0.491519	1.38367	0.0798479	0.233698	1	1490	tags=30%, list=13%, signal=35%
GSE360_T_GONDII_VS_M_TUBERCULOSIS_MAC_UP	GSE360_T_GONDII_VS_M_TUBERCULOSIS_MAC_UP		150	0.342002	1.38363	0.0164234	0.233515	1	1010	tags=17%, list=9%, signal=19%
GO_CENTRIOLE_ASSEMBLY	GO_CENTRIOLE_ASSEMBLY		16	0.522875	1.38362	0.0868794	0.233294	1	3524	tags=63%, list=30%, signal=90%
GSE16386_IL4_VS_IL4_AND_ROSIGLITAZONE_STIM_MACROPHAGE_6H_DN	GSE16386_IL4_VS_IL4_AND_ROSIGLITAZONE_STIM_MACROPHAGE_6H_DN		83	0.372956	1.38303	0.0265487	0.234113	1	2194	tags=27%, list=19%, signal=32%
GSE10147_IL3_VS_IL3_AND_HIVP17_STIM_PDC_UP	GSE10147_IL3_VS_IL3_AND_HIVP17_STIM_PDC_UP		128	0.348694	1.38282	0.0284091	0.234227	1	2195	tags=27%, list=19%, signal=33%
GO_CENTROSOME	GO_CENTROSOME		373	0.305953	1.38249	0	0.234585	1	2250	tags=26%, list=19%, signal=32%
GSE27786_NKCELL_VS_MONO_MAC_DN	GSE27786_NKCELL_VS_MONO_MAC_DN		114	0.355027	1.38234	0.0341113	0.234617	1	2296	tags=29%, list=20%, signal=36%
FIGUEROA_AML_METHYLATION_CLUSTER_3_DN	FIGUEROA_AML_METHYLATION_CLUSTER_3_DN		22	0.487706	1.38232	0.100179	0.234422	1	2135	tags=32%, list=18%, signal=39%
MORF_FANCG	MORF_FANCG		121	0.350958	1.38175	0.0314815	0.235232	1	2223	tags=31%, list=19%, signal=37%
GSE22033_UNTREATED_VS_MRL24_TREATED_MEF_UP	GSE22033_UNTREATED_VS_MRL24_TREATED_MEF_UP		157	0.34136	1.38148	0.0176678	0.235459	1	2894	tags=39%, list=25%, signal=51%
GO_PRESPLICEOSOME	GO_PRESPLICEOSOME		20	0.506548	1.38144	0.102941	0.235271	1	2768	tags=65%, list=24%, signal=85%
GSE28237_FOLLICULAR_VS_EARLY_GC_BCELL_DN	GSE28237_FOLLICULAR_VS_EARLY_GC_BCELL_DN		156	0.335685	1.38143	0.0154905	0.235043	1	3065	tags=40%, list=26%, signal=54%
GSE11924_TFH_VS_TH1_CD4_TCELL_DN	GSE11924_TFH_VS_TH1_CD4_TCELL_DN		125	0.350123	1.38133	0.0253165	0.234966	1	1659	tags=21%, list=14%, signal=24%
GSE22432_CDC_VS_COMMON_DC_PROGENITOR_DN	GSE22432_CDC_VS_COMMON_DC_PROGENITOR_DN		156	0.335751	1.38131	0.0125673	0.234752	1	2613	tags=33%, list=23%, signal=42%
GSE20727_DNFB_ALLERGEN_VS_ROS_INH_AND_DNFB_ALLERGEN_TREATED_DC_DN	GSE20727_DNFB_ALLERGEN_VS_ROS_INH_AND_DNFB_ALLERGEN_TREATED_DC_DN		160	0.33509	1.38129	0.024911	0.234555	1	1995	tags=28%, list=17%, signal=34%
GSE369_SOCS3_KO_VS_IFNG_KO_LIVER_DN	GSE369_SOCS3_KO_VS_IFNG_KO_LIVER_DN		143	0.340293	1.38095	0.0159858	0.234902	1	2802	tags=38%, list=24%, signal=50%
MORF_CTBP1	MORF_CTBP1		162	0.337043	1.38034	0.0125	0.235721	1	3519	tags=44%, list=30%, signal=62%
REACTOME_AMINO_ACID_AND_OLIGOPEPTIDE_SLC_TRANSPORTERS	REACTOME_AMINO_ACID_AND_OLIGOPEPTIDE_SLC_TRANSPORTERS		22	0.484931	1.37858	0.0854545	0.238556	1	1836	tags=32%, list=16%, signal=38%
GSE17721_PAM3CSK4_VS_GADIQUIMOD_1H_BMDC_DN	GSE17721_PAM3CSK4_VS_GADIQUIMOD_1H_BMDC_DN		170	0.337419	1.3782	0.0126582	0.239016	1	1803	tags=24%, list=16%, signal=27%
GSE3982_CTRL_VS_LPS_4H_MAC_UP	GSE3982_CTRL_VS_LPS_4H_MAC_UP		161	0.340025	1.37792	0.0160142	0.239255	1	2210	tags=29%, list=19%, signal=35%
GSE15930_STIM_VS_STIM_AND_IFNAB_48H_CD8_T_CELL_UP	GSE15930_STIM_VS_STIM_AND_IFNAB_48H_CD8_T_CELL_UP		169	0.3345	1.37737	0.0141844	0.240002	1	2443	tags=29%, list=21%, signal=36%
MORF_RFC4	MORF_RFC4		143	0.345349	1.37715	0.0160714	0.240163	1	2457	tags=30%, list=21%, signal=38%
CROONQUIST_NRAS_VS_STROMAL_STIMULATION_DN	CROONQUIST_NRAS_VS_STROMAL_STIMULATION_DN		82	0.379735	1.37644	0.0385356	0.241165	1	1827	tags=44%, list=16%, signal=52%
REACTOME_G1_S_SPECIFIC_TRANSCRIPTION	REACTOME_G1_S_SPECIFIC_TRANSCRIPTION		16	0.519299	1.3763	0.104129	0.241195	1	2997	tags=69%, list=26%, signal=93%
GSE13411_PLASMA_CELL_VS_MEMORY_BCELL_UP	GSE13411_PLASMA_CELL_VS_MEMORY_BCELL_UP		145	0.342054	1.376	0.0157343	0.241473	1	1989	tags=30%, list=17%, signal=36%
GO_MICROTUBULE_ORGANIZING_CENTER	GO_MICROTUBULE_ORGANIZING_CENTER		467	0.303586	1.37587	0	0.241502	1	2199	tags=25%, list=19%, signal=30%
GSE3039_CD4_TCELL_VS_ALPHAALPHA_CD8_TCELL_DN	GSE3039_CD4_TCELL_VS_ALPHAALPHA_CD8_TCELL_DN		139	0.342253	1.37554	0.0210896	0.241819	1	1424	tags=24%, list=12%, signal=28%
GSE4811_CLASSSICALY_ACTIVATED_VS_TYPE_2_ACTIVATED_MACROPHAGE_UP	GSE4811_CLASSSICALY_ACTIVATED_VS_TYPE_2_ACTIVATED_MACROPHAGE_UP		127	0.346705	1.37518	0.0284697	0.24221	1	2966	tags=35%, list=26%, signal=46%
GO_MICROTUBULE_BASED_MOVEMENT	GO_MICROTUBULE_BASED_MOVEMENT		131	0.341502	1.37508	0.0249554	0.242155	1	2595	tags=34%, list=22%, signal=43%
MODULE_102	MODULE_102		17	0.514197	1.37421	0.104762	0.243543	1	3732	tags=65%, list=32%, signal=95%
GO_POSITIVE_REGULATION_OF_DNA_REPLICATION	GO_POSITIVE_REGULATION_OF_DNA_REPLICATION		56	0.400029	1.37402	0.0672566	0.243636	1	1785	tags=38%, list=15%, signal=44%
GSE9946_LISTERIA_INF_MATURE_VS_PROSTAGLANDINE2_TREATED_MATURE_DC_UP	GSE9946_LISTERIA_INF_MATURE_VS_PROSTAGLANDINE2_TREATED_MATURE_DC_UP		72	0.381761	1.37235	0.060219	0.246412	1	2615	tags=35%, list=23%, signal=45%
GSE13762_CTRL_VS_125_VITAMIND_DAY5_DC_UP	GSE13762_CTRL_VS_125_VITAMIND_DAY5_DC_UP		51	0.408367	1.37206	0.0458716	0.246702	1	2407	tags=37%, list=21%, signal=47%
REACTOME_FACTORS_INVOLVED_IN_MEGAKARYOCYTE_DEVELOPMENT_AND_PLATELET_PRODUCTION	REACTOME_FACTORS_INVOLVED_IN_MEGAKARYOCYTE_DEVELOPMENT_AND_PLATELET_PRODUCTION		85	0.365646	1.37165	0.0309654	0.247207	1	1951	tags=32%, list=17%, signal=38%
GO_PYRIMIDINE_CONTAINING_COMPOUND_METABOLIC_PROCESS	GO_PYRIMIDINE_CONTAINING_COMPOUND_METABOLIC_PROCESS		55	0.394934	1.37124	0.0642857	0.24773	1	2612	tags=35%, list=23%, signal=44%
GSE5960_TH1_VS_ANERGIC_TH1_UP	GSE5960_TH1_VS_ANERGIC_TH1_UP		155	0.330749	1.37109	0.0193322	0.247763	1	2604	tags=32%, list=22%, signal=40%
GSE9239_CTRL_VS_TNF_INHIBITOR_TREATED_DC_DN	GSE9239_CTRL_VS_TNF_INHIBITOR_TREATED_DC_DN		154	0.335938	1.37106	0.020073	0.247551	1	2017	tags=28%, list=17%, signal=33%
PID_DELTA_NP63_PATHWAY	PID_DELTA_NP63_PATHWAY		33	0.445974	1.37069	0.0849057	0.247995	1	1396	tags=30%, list=12%, signal=34%
GO_MITOCHONDRIAL_RNA_METABOLIC_PROCESS	GO_MITOCHONDRIAL_RNA_METABOLIC_PROCESS		23	0.475779	1.37066	0.102564	0.247816	1	3287	tags=57%, list=28%, signal=79%
GSE4142_GC_BCELL_VS_MEMORY_BCELL_DN	GSE4142_GC_BCELL_VS_MEMORY_BCELL_DN		142	0.342327	1.37062	0.0313044	0.247634	1	1810	tags=21%, list=16%, signal=25%
GSE41867_NAIVE_VS_EFFECTOR_CD8_TCELL_DN	GSE41867_NAIVE_VS_EFFECTOR_CD8_TCELL_DN		174	0.327969	1.37057	0.0087108	0.247473	1	2895	tags=37%, list=25%, signal=48%
CHR4Q35	CHR4Q35		18	0.500208	1.37045	0.102467	0.247465	1	3241	tags=56%, list=28%, signal=77%
GO_STRUCTURE_SPECIFIC_DNA_BINDING	GO_STRUCTURE_SPECIFIC_DNA_BINDING		94	0.362721	1.37036	0.0441696	0.247386	1	2650	tags=36%, list=23%, signal=47%
GSE41867_LCMV_ARMSTRONG_VS_CLONE13_DAY6_EFFECTOR_CD8_TCELL_DN	GSE41867_LCMV_ARMSTRONG_VS_CLONE13_DAY6_EFFECTOR_CD8_TCELL_DN		166	0.334116	1.37015	0.012069	0.247532	1	1543	tags=23%, list=13%, signal=26%
GSE20198_IL12_VS_IFNA_TREATED_ACT_CD4_TCELL_UP	GSE20198_IL12_VS_IFNA_TREATED_ACT_CD4_TCELL_UP		169	0.330738	1.36981	0.0315236	0.247939	1	2755	tags=34%, list=24%, signal=44%
GO_MRNA_BINDING	GO_MRNA_BINDING		119	0.348698	1.36974	0.0351759	0.247814	1	2013	tags=30%, list=17%, signal=36%
FISCHER_DIRECT_P53_TARGETS_META_ANALYSIS	FISCHER_DIRECT_P53_TARGETS_META_ANALYSIS		230	0.320556	1.3686	0.013986	0.249668	1	1687	tags=22%, list=15%, signal=25%
GSE27859_DC_VS_CD11C_INT_F480_INT_DC_DN	GSE27859_DC_VS_CD11C_INT_F480_INT_DC_DN		179	0.32751	1.36772	0.0126812	0.251091	1	2699	tags=35%, list=23%, signal=44%
GO_TRANSFERASE_ACTIVITY_TRANSFERRING_ONE_CARBON_GROUPS	GO_TRANSFERASE_ACTIVITY_TRANSFERRING_ONE_CARBON_GROUPS		154	0.336558	1.36719	0.0218487	0.251821	1	2546	tags=32%, list=22%, signal=41%
GSE37532_VISCERAL_ADIPOSE_TISSUE_VS_LN_DERIVED_PPARG_KO_TCONV_CD4_TCELL_UP	GSE37532_VISCERAL_ADIPOSE_TISSUE_VS_LN_DERIVED_PPARG_KO_TCONV_CD4_TCELL_UP		149	0.337226	1.36706	0.0212014	0.25182	1	2845	tags=37%, list=25%, signal=48%
MORF_ERCC4	MORF_ERCC4		138	0.341027	1.367	0.0319149	0.251679	1	2646	tags=28%, list=23%, signal=36%
GCM_TINF2	GCM_TINF2		38	0.425158	1.36698	0.0924214	0.251478	1	2810	tags=39%, list=24%, signal=52%
GSE1112_OT1_VS_HY_CD8AB_THYMOCYTE_RTOC_CULTURE_DN	GSE1112_OT1_VS_HY_CD8AB_THYMOCYTE_RTOC_CULTURE_DN		160	0.331847	1.3666	0.0142349	0.251959	1	2433	tags=28%, list=21%, signal=35%
GO_CULLIN_RING_UBIQUITIN_LIGASE_COMPLEX	GO_CULLIN_RING_UBIQUITIN_LIGASE_COMPLEX		107	0.35498	1.36659	0.0342466	0.251738	1	2994	tags=34%, list=26%, signal=45%
GO_NEGATIVE_REGULATION_OF_TELOMERE_MAINTENANCE_VIA_TELOMERE_LENGTHENING	GO_NEGATIVE_REGULATION_OF_TELOMERE_MAINTENANCE_VIA_TELOMERE_LENGTHENING		16	0.519448	1.3665	0.130435	0.251668	1	1718	tags=44%, list=15%, signal=51%
REACTOME_MRNA_CAPPING	REACTOME_MRNA_CAPPING		29	0.465	1.36643	0.0892193	0.251555	1	2766	tags=41%, list=24%, signal=54%
GSE17301_ACD3_ACD28_VS_ACD3_ACD28_AND_IFNA2_STIM_CD8_TCELL_UP	GSE17301_ACD3_ACD28_VS_ACD3_ACD28_AND_IFNA2_STIM_CD8_TCELL_UP		141	0.341597	1.36627	0.024735	0.251621	1	2531	tags=34%, list=22%, signal=43%
GO_RESPONSE_TO_INCREASED_OXYGEN_LEVELS	GO_RESPONSE_TO_INCREASED_OXYGEN_LEVELS		16	0.519345	1.36568	0.108818	0.252525	1	1468	tags=25%, list=13%, signal=29%
BIOCARTA_ARAP_PATHWAY	BIOCARTA_ARAP_PATHWAY		15	0.521088	1.36566	0.128544	0.252303	1	2559	tags=47%, list=22%, signal=60%
GSE4142_PLASMA_CELL_VS_MEMORY_BCELL_DN	GSE4142_PLASMA_CELL_VS_MEMORY_BCELL_DN		122	0.346407	1.36481	0.0330275	0.253657	1	2980	tags=37%, list=26%, signal=49%
GO_DAMAGED_DNA_BINDING	GO_DAMAGED_DNA_BINDING		55	0.401848	1.36468	0.0718133	0.253657	1	3009	tags=45%, list=26%, signal=61%
GO_POSITIVE_REGULATION_OF_DNA_BIOSYNTHETIC_PROCESS	GO_POSITIVE_REGULATION_OF_DNA_BIOSYNTHETIC_PROCESS		45	0.414775	1.36435	0.0642202	0.254003	1	1785	tags=38%, list=15%, signal=44%
GO_HISTONE_UBIQUITINATION	GO_HISTONE_UBIQUITINATION		29	0.456972	1.36418	0.0890152	0.254075	1	864	tags=21%, list=7%, signal=22%
CHUNG_BLISTER_CYTOTOXICITY_UP	CHUNG_BLISTER_CYTOTOXICITY_UP		115	0.348751	1.36342	0.0397924	0.255266	1	1626	tags=24%, list=14%, signal=28%
KONDO_PROSTATE_CANCER_HCP_WITH_H3K27ME3	KONDO_PROSTATE_CANCER_HCP_WITH_H3K27ME3		41	0.418187	1.36342	0.0641509	0.255028	1	1994	tags=34%, list=17%, signal=41%
MORF_SART1	MORF_SART1		62	0.387862	1.3627	0.0578662	0.256137	1	3366	tags=42%, list=29%, signal=59%
LY_AGING_PREMATURE_DN	LY_AGING_PREMATURE_DN		26	0.469491	1.36261	0.0788955	0.256052	1	2311	tags=46%, list=20%, signal=58%
PUJANA_BREAST_CANCER_LIT_INT_NETWORK	PUJANA_BREAST_CANCER_LIT_INT_NETWORK		91	0.362187	1.36254	0.038674	0.255934	1	2997	tags=41%, list=26%, signal=54%
HOLLERN_MICROACINAR_BREAST_TUMOR_UP	HOLLERN_MICROACINAR_BREAST_TUMOR_UP		19	0.501931	1.36216	0.118705	0.256417	1	1489	tags=37%, list=13%, signal=42%
GO_NEGATIVE_REGULATION_OF_HEMATOPOIETIC_PROGENITOR_CELL_DIFFERENTIATION	GO_NEGATIVE_REGULATION_OF_HEMATOPOIETIC_PROGENITOR_CELL_DIFFERENTIATION		19	0.496968	1.36106	0.0869565	0.258254	1	85	tags=16%, list=1%, signal=16%
GO_NUCLEIC_ACID_PHOSPHODIESTER_BOND_HYDROLYSIS	GO_NUCLEIC_ACID_PHOSPHODIESTER_BOND_HYDROLYSIS		200	0.322326	1.36101	0.0107143	0.258099	1	2834	tags=34%, list=24%, signal=44%
GO_REGULATION_OF_CELL_CYCLE_ARREST	GO_REGULATION_OF_CELL_CYCLE_ARREST		79	0.370242	1.36051	0.0490018	0.258791	1	1807	tags=27%, list=16%, signal=31%
CHR1Q41	CHR1Q41		17	0.508464	1.36033	0.114019	0.258902	1	2252	tags=35%, list=19%, signal=44%
GO_PROTEIN_TARGETING_TO_LYSOSOME	GO_PROTEIN_TARGETING_TO_LYSOSOME		15	0.536096	1.36025	0.118199	0.258807	1	1070	tags=20%, list=9%, signal=22%
MODULE_32	MODULE_32		229	0.317502	1.36005	0.00511073	0.258977	1	2512	tags=32%, list=22%, signal=40%
GO_G_PROTEIN_COUPLED_RECEPTOR_ACTIVITY	GO_G_PROTEIN_COUPLED_RECEPTOR_ACTIVITY		114	0.347131	1.35961	0.0297723	0.259534	1	1092	tags=13%, list=9%, signal=14%
BOYAULT_LIVER_CANCER_SUBCLASS_G123_UP	BOYAULT_LIVER_CANCER_SUBCLASS_G123_UP		39	0.420279	1.3595	0.0645161	0.259493	1	1660	tags=33%, list=14%, signal=39%
YAATNRNNNYNATT_UNKNOWN	YAATNRNNNYNATT_UNKNOWN		48	0.406189	1.35945	0.0828516	0.25934	1	3316	tags=40%, list=29%, signal=55%
GO_MITOTIC_SPINDLE	GO_MITOTIC_SPINDLE		46	0.403756	1.35893	0.0816327	0.260101	1	2975	tags=48%, list=26%, signal=64%
VEGF_A_UP.V1_DN	VEGF_A_UP.V1_DN		142	0.334537	1.35803	0.0288625	0.261577	1	2181	tags=27%, list=19%, signal=33%
GO_PYRIMIDINE_NUCLEOSIDE_TRIPHOSPHATE_METABOLIC_PROCESS	GO_PYRIMIDINE_NUCLEOSIDE_TRIPHOSPHATE_METABOLIC_PROCESS		16	0.516982	1.35795	0.126733	0.261479	1	1186	tags=31%, list=10%, signal=35%
GSE5589_WT_VS_IL6_KO_LPS_AND_IL10_STIM_MACROPHAGE_180MIN_UP	GSE5589_WT_VS_IL6_KO_LPS_AND_IL10_STIM_MACROPHAGE_180MIN_UP		47	0.410511	1.35784	0.0590278	0.261422	1	2357	tags=30%, list=20%, signal=37%
GSE13485_DAY1_VS_DAY21_YF17D_VACCINE_PBMC_DN	GSE13485_DAY1_VS_DAY21_YF17D_VACCINE_PBMC_DN		160	0.331253	1.35783	0.0309091	0.261185	1	3267	tags=39%, list=28%, signal=53%
GSE25088_CTRL_VS_ROSIGLITAZONE_STIM_MACROPHAGE_DN	GSE25088_CTRL_VS_ROSIGLITAZONE_STIM_MACROPHAGE_DN		92	0.360072	1.35766	0.0525362	0.261244	1	1775	tags=23%, list=15%, signal=27%
GSE27786_ERYTHROBLAST_VS_MONO_MAC_UP	GSE27786_ERYTHROBLAST_VS_MONO_MAC_UP		120	0.340156	1.35766	0.0336283	0.261012	1	1203	tags=20%, list=10%, signal=22%
GSE2197_IMMUNOSUPPRESSIVE_DNA_VS_UNTREATEDIN_DC_DN	GSE2197_IMMUNOSUPPRESSIVE_DNA_VS_UNTREATEDIN_DC_DN		149	0.33497	1.35731	0.0295749	0.261443	1	2456	tags=28%, list=21%, signal=35%
CTCTGGA_MIR520A_MIR525	CTCTGGA_MIR520A_MIR525		110	0.352117	1.35719	0.0248668	0.261414	1	1380	tags=24%, list=12%, signal=27%
GSE2770_UNTREATED_VS_TGFB_AND_IL12_TREATED_ACT_CD4_TCELL_2H_DN	GSE2770_UNTREATED_VS_TGFB_AND_IL12_TREATED_ACT_CD4_TCELL_2H_DN		131	0.340306	1.35714	0.0239726	0.261269	1	1792	tags=27%, list=15%, signal=31%
NOUZOVA_TRETINOIN_AND_H4_ACETYLATION	NOUZOVA_TRETINOIN_AND_H4_ACETYLATION		120	0.346061	1.35585	0.0259516	0.263564	1	2777	tags=37%, list=24%, signal=48%
CHEMNITZ_RESPONSE_TO_PROSTAGLANDIN_E2_UP	CHEMNITZ_RESPONSE_TO_PROSTAGLANDIN_E2_UP		116	0.343583	1.35553	0.0338681	0.263931	1	1827	tags=28%, list=16%, signal=33%
GNF2_ELAC2	GNF2_ELAC2		45	0.405715	1.35531	0.0814394	0.264112	1	2902	tags=44%, list=25%, signal=59%
GO_MICROTUBULE_ASSOCIATED_COMPLEX	GO_MICROTUBULE_ASSOCIATED_COMPLEX		89	0.355612	1.35519	0.0394737	0.264093	1	2165	tags=33%, list=19%, signal=40%
GSE27786_LIN_NEG_VS_CD4_TCELL_UP	GSE27786_LIN_NEG_VS_CD4_TCELL_UP		151	0.330176	1.35504	0.028021	0.264141	1	2504	tags=30%, list=22%, signal=38%
GO_MEIOTIC_CHROMOSOME_SEGREGATION	GO_MEIOTIC_CHROMOSOME_SEGREGATION		30	0.442855	1.35474	0.0923077	0.264448	1	2890	tags=47%, list=25%, signal=62%
GSE45837_WT_VS_GFI1_KO_PDC_DN	GSE45837_WT_VS_GFI1_KO_PDC_DN		188	0.321546	1.35319	0.0141844	0.26724	1	1974	tags=25%, list=17%, signal=30%
NFY_C	NFY_C		169	0.327269	1.35263	0.0174216	0.268032	1	3173	tags=43%, list=27%, signal=59%
GO_ORGANIC_ACID_TRANSMEMBRANE_TRANSPORT	GO_ORGANIC_ACID_TRANSMEMBRANE_TRANSPORT		48	0.405375	1.3526	0.0773585	0.26784	1	1219	tags=17%, list=11%, signal=19%
MORF_EIF4A2	MORF_EIF4A2		134	0.339995	1.35252	0.0327586	0.267768	1	2786	tags=35%, list=24%, signal=46%
CCAATNNSNNNGCG_UNKNOWN	CCAATNNSNNNGCG_UNKNOWN		44	0.411263	1.352	0.0669014	0.268553	1	1730	tags=27%, list=15%, signal=32%
KEGG_BASAL_CELL_CARCINOMA	KEGG_BASAL_CELL_CARCINOMA		21	0.491364	1.35195	0.0770751	0.268392	1	190	tags=14%, list=2%, signal=14%
GO_PROTEIN_IMPORT	GO_PROTEIN_IMPORT		122	0.345305	1.35179	0.0297952	0.268451	1	1381	tags=18%, list=12%, signal=20%
GO_REGULATION_OF_CARDIAC_MUSCLE_TISSUE_DEVELOPMENT	GO_REGULATION_OF_CARDIAC_MUSCLE_TISSUE_DEVELOPMENT		21	0.473232	1.35107	0.117988	0.269634	1	2932	tags=43%, list=25%, signal=57%
GSE2770_IL12_VS_IL4_TREATED_ACT_CD4_TCELL_2H_UP	GSE2770_IL12_VS_IL4_TREATED_ACT_CD4_TCELL_2H_UP		95	0.357773	1.35089	0.0514706	0.269757	1	900	tags=17%, list=8%, signal=18%
GSE5589_IL6_KO_VS_IL10_KO_LPS_STIM_MACROPHAGE_45MIN_UP	GSE5589_IL6_KO_VS_IL10_KO_LPS_STIM_MACROPHAGE_45MIN_UP		158	0.323825	1.35076	0.0194346	0.269769	1	2357	tags=28%, list=20%, signal=34%
GO_POSITIVE_REGULATION_OF_CYTOKINESIS	GO_POSITIVE_REGULATION_OF_CYTOKINESIS		21	0.485322	1.35074	0.125693	0.269549	1	1858	tags=38%, list=16%, signal=45%
GSE23505_IL6_IL1_VS_IL6_IL1_IL23_TREATED_CD4_TCELL_UP	GSE23505_IL6_IL1_VS_IL6_IL1_IL23_TREATED_CD4_TCELL_UP		140	0.336106	1.35056	0.0247788	0.269644	1	2673	tags=34%, list=23%, signal=43%
GSE19941_UNSTIM_VS_LPS_AND_IL10_STIM_IL10_KO_MACROPHAGE_DN	GSE19941_UNSTIM_VS_LPS_AND_IL10_STIM_IL10_KO_MACROPHAGE_DN		155	0.332616	1.35029	0.0318021	0.269904	1	2253	tags=30%, list=19%, signal=36%
PUIFFE_INVASION_INHIBITED_BY_ASCITES_UP	PUIFFE_INVASION_INHIBITED_BY_ASCITES_UP		71	0.376295	1.34979	0.0530165	0.270643	1	2525	tags=34%, list=22%, signal=43%
GO_PRECATALYTIC_SPLICEOSOME	GO_PRECATALYTIC_SPLICEOSOME		20	0.487712	1.34859	0.105751	0.272789	1	2768	tags=45%, list=24%, signal=59%
GO_MALE_MEIOSIS	GO_MALE_MEIOSIS		16	0.505144	1.34834	0.118421	0.273047	1	646	tags=25%, list=6%, signal=26%
JAK2_DN.V1_UP	JAK2_DN.V1_UP		49	0.405646	1.34809	0.0698529	0.273296	1	2304	tags=39%, list=20%, signal=48%
GSE8921_UNSTIM_0H_VS_TLR1_2_STIM_MONOCYTE_6H_UP	GSE8921_UNSTIM_0H_VS_TLR1_2_STIM_MONOCYTE_6H_UP		130	0.336904	1.34748	0.0388693	0.274271	1	2840	tags=36%, list=25%, signal=47%
MORF_PSMC2	MORF_PSMC2		114	0.345619	1.34729	0.0491228	0.274407	1	1576	tags=23%, list=14%, signal=26%
GSE17721_LPS_VS_POLYIC_8H_BMDC_UP	GSE17721_LPS_VS_POLYIC_8H_BMDC_UP		148	0.334247	1.34721	0.0241796	0.274303	1	2131	tags=24%, list=18%, signal=29%
GSE14908_ATOPIC_VS_NONATOPIC_PATIENT_HDM_STIM_CD4_TCELL_UP	GSE14908_ATOPIC_VS_NONATOPIC_PATIENT_HDM_STIM_CD4_TCELL_UP		162	0.329742	1.34708	0.0255941	0.274303	1	2183	tags=25%, list=19%, signal=30%
GSE8921_UNSTIM_VS_TLR1_2_STIM_MONOCYTE_3H_UP	GSE8921_UNSTIM_VS_TLR1_2_STIM_MONOCYTE_3H_UP		140	0.336325	1.34701	0.0289855	0.27419	1	2019	tags=33%, list=17%, signal=39%
CHR2Q32	CHR2Q32		28	0.454669	1.34664	0.0877514	0.274689	1	1308	tags=25%, list=11%, signal=28%
GO_NEGATIVE_REGULATION_OF_CELLULAR_CATABOLIC_PROCESS	GO_NEGATIVE_REGULATION_OF_CELLULAR_CATABOLIC_PROCESS		112	0.342391	1.3463	0.0305206	0.275125	1	2007	tags=27%, list=17%, signal=32%
KIM_ALL_DISORDERS_DURATION_CORR_DN	KIM_ALL_DISORDERS_DURATION_CORR_DN		121	0.33751	1.34606	0.0242215	0.275362	1	1440	tags=21%, list=12%, signal=23%
GSE3720_VD1_VS_VD2_GAMMADELTA_TCELL_UP	GSE3720_VD1_VS_VD2_GAMMADELTA_TCELL_UP		130	0.337613	1.34589	0.0305085	0.275472	1	1916	tags=27%, list=17%, signal=32%
GSE3039_B2_VS_B1_BCELL_DN	GSE3039_B2_VS_B1_BCELL_DN		146	0.335053	1.34537	0.0162162	0.276264	1	1779	tags=24%, list=15%, signal=28%
GSE6674_CPG_VS_PL2_3_STIM_BCELL_UP	GSE6674_CPG_VS_PL2_3_STIM_BCELL_UP		151	0.330996	1.34525	0.0374787	0.276268	1	1209	tags=15%, list=10%, signal=17%
GO_SODIUM_ION_TRANSMEMBRANE_TRANSPORTER_ACTIVITY	GO_SODIUM_ION_TRANSMEMBRANE_TRANSPORTER_ACTIVITY		47	0.403082	1.34503	0.0795455	0.276432	1	1923	tags=23%, list=17%, signal=28%
GCM_DPF2	GCM_DPF2		23	0.466959	1.34482	0.104505	0.276612	1	2465	tags=43%, list=21%, signal=55%
GSE22886_NAIVE_CD4_TCELL_VS_12H_ACT_TH2_DN	GSE22886_NAIVE_CD4_TCELL_VS_12H_ACT_TH2_DN		182	0.324602	1.34452	0.0307414	0.276967	1	2606	tags=30%, list=23%, signal=38%
GO_POSTREPLICATION_REPAIR	GO_POSTREPLICATION_REPAIR		43	0.412798	1.34417	0.0833333	0.277375	1	2970	tags=49%, list=26%, signal=65%
GO_MICROTUBULE_BASED_PROCESS	GO_MICROTUBULE_BASED_PROCESS		343	0.29919	1.34416	0.0017094	0.277145	1	2425	tags=30%, list=21%, signal=37%
MORF_DMPK	MORF_DMPK		82	0.365882	1.34402	0.0459966	0.277171	1	2646	tags=28%, list=23%, signal=36%
GO_RNA_LOCALIZATION	GO_RNA_LOCALIZATION		157	0.331998	1.34353	0.0325901	0.27787	1	3465	tags=38%, list=30%, signal=53%
GSE41867_NAIVE_VS_DAY8_LCMV_EFFECTOR_CD8_TCELL_UP	GSE41867_NAIVE_VS_DAY8_LCMV_EFFECTOR_CD8_TCELL_UP		169	0.329401	1.34345	0.0191972	0.277785	1	2093	tags=24%, list=18%, signal=28%
MORF_CSNK2B	MORF_CSNK2B		280	0.306571	1.3431	0.0155979	0.278205	1	2857	tags=33%, list=25%, signal=43%
GCM_DDX5	GCM_DDX5		64	0.380629	1.34297	0.0669145	0.278211	1	2732	tags=39%, list=24%, signal=51%
GABRIELY_MIR21_TARGETS	GABRIELY_MIR21_TARGETS		232	0.312878	1.34297	0.0106007	0.27797	1	2711	tags=30%, list=23%, signal=39%
GSE10239_NAIVE_VS_DAY4.5_EFF_CD8_TCELL_DN	GSE10239_NAIVE_VS_DAY4.5_EFF_CD8_TCELL_DN		178	0.322074	1.34289	0.0256849	0.277885	1	2311	tags=33%, list=20%, signal=40%
GO_ANATOMICAL_STRUCTURE_HOMEOSTASIS	GO_ANATOMICAL_STRUCTURE_HOMEOSTASIS		187	0.323287	1.34278	0.0253807	0.277847	1	2272	tags=29%, list=20%, signal=36%
GSE3982_DC_VS_MAC_UP	GSE3982_DC_VS_MAC_UP		134	0.337907	1.34251	0.0251347	0.278148	1	1863	tags=25%, list=16%, signal=29%
VANTVEER_BREAST_CANCER_BRCA1_DN	VANTVEER_BREAST_CANCER_BRCA1_DN		27	0.447332	1.34243	0.108257	0.278052	1	2500	tags=30%, list=22%, signal=38%
CHR9Q33	CHR9Q33		33	0.418672	1.34217	0.0897666	0.278323	1	2945	tags=42%, list=25%, signal=57%
YAO_TEMPORAL_RESPONSE_TO_PROGESTERONE_CLUSTER_10	YAO_TEMPORAL_RESPONSE_TO_PROGESTERONE_CLUSTER_10		62	0.382847	1.34149	0.0524272	0.279421	1	2466	tags=39%, list=21%, signal=49%
GO_NUCLEAR_TRANSCRIBED_MRNA_CATABOLIC_PROCESS_EXONUCLEOLYTIC	GO_NUCLEAR_TRANSCRIBED_MRNA_CATABOLIC_PROCESS_EXONUCLEOLYTIC		30	0.439432	1.34118	0.100917	0.279832	1	2940	tags=47%, list=25%, signal=62%
GO_AMINO_ACID_TRANSPORT	GO_AMINO_ACID_TRANSPORT		56	0.388763	1.34101	0.0702087	0.279901	1	1229	tags=20%, list=11%, signal=22%
GSE21670_TGFB_VS_TGFB_AND_IL6_TREATED_CD4_TCELL_DN	GSE21670_TGFB_VS_TGFB_AND_IL6_TREATED_CD4_TCELL_DN		152	0.331444	1.34096	0.0417423	0.279747	1	1826	tags=24%, list=16%, signal=28%
KEGG_DRUG_METABOLISM_OTHER_ENZYMES	KEGG_DRUG_METABOLISM_OTHER_ENZYMES		23	0.458903	1.34095	0.12963	0.279518	1	3340	tags=43%, list=29%, signal=61%
OISHI_CHOLANGIOMA_STEM_CELL_LIKE_UP	OISHI_CHOLANGIOMA_STEM_CELL_LIKE_UP		281	0.306738	1.34095	0.00983607	0.279268	1	2421	tags=28%, list=21%, signal=35%
GO_REGULATION_OF_HEMATOPOIETIC_PROGENITOR_CELL_DIFFERENTIATION	GO_REGULATION_OF_HEMATOPOIETIC_PROGENITOR_CELL_DIFFERENTIATION		32	0.427282	1.34094	0.0977444	0.279025	1	104	tags=13%, list=1%, signal=13%
VERHAAK_GLIOBLASTOMA_PRONEURAL	VERHAAK_GLIOBLASTOMA_PRONEURAL		100	0.345376	1.3409	0.046875	0.278866	1	2331	tags=28%, list=20%, signal=35%
GSE21927_UNTREATED_VS_GMCSF_IL6_TREATED_BONE_MARROW_DN	GSE21927_UNTREATED_VS_GMCSF_IL6_TREATED_BONE_MARROW_DN		114	0.346106	1.3406	0.0330275	0.279195	1	987	tags=16%, list=9%, signal=17%
BENPORATH_OCT4_TARGETS	BENPORATH_OCT4_TARGETS		201	0.320414	1.3403	0.0242634	0.279527	1	2897	tags=33%, list=25%, signal=44%
GNF2_PTPN4	GNF2_PTPN4		29	0.435222	1.34014	0.0902256	0.279623	1	1852	tags=24%, list=16%, signal=29%
MORF_RAD54L	MORF_RAD54L		101	0.347818	1.34013	0.0548673	0.279388	1	1249	tags=21%, list=11%, signal=23%
GSE26928_NAIVE_VS_EFF_MEMORY_CD4_TCELL_UP	GSE26928_NAIVE_VS_EFF_MEMORY_CD4_TCELL_UP		132	0.331319	1.33957	0.0335689	0.280266	1	2798	tags=32%, list=24%, signal=41%
GSE37605_FOXP3_FUSION_GFP_VS_IRES_GFP_TREG_NOD_DN	GSE37605_FOXP3_FUSION_GFP_VS_IRES_GFP_TREG_NOD_DN		107	0.347277	1.33953	0.0516014	0.280087	1	2019	tags=25%, list=17%, signal=30%
MORF_PTPN11	MORF_PTPN11		105	0.345958	1.33886	0.0253165	0.281183	1	2334	tags=24%, list=20%, signal=30%
GSE18791_CTRL_VS_NEWCASTLE_VIRUS_DC_6H_UP	GSE18791_CTRL_VS_NEWCASTLE_VIRUS_DC_6H_UP		168	0.321405	1.33873	0.0333333	0.281203	1	2714	tags=35%, list=23%, signal=45%
GSE12366_GC_VS_MEMORY_BCELL_UP	GSE12366_GC_VS_MEMORY_BCELL_UP		159	0.327572	1.33849	0.0396552	0.281438	1	2694	tags=36%, list=23%, signal=46%
GSE1460_DP_THYMOCYTE_VS_NAIVE_CD4_TCELL_CORD_BLOOD_UP	GSE1460_DP_THYMOCYTE_VS_NAIVE_CD4_TCELL_CORD_BLOOD_UP		159	0.329281	1.3384	0.0352734	0.281373	1	2935	tags=36%, list=25%, signal=48%
GO_PYRIMIDINE_NUCLEOSIDE_METABOLIC_PROCESS	GO_PYRIMIDINE_NUCLEOSIDE_METABOLIC_PROCESS		35	0.421667	1.33837	0.0859813	0.281167	1	1827	tags=31%, list=16%, signal=37%
REACTOME_KINESINS	REACTOME_KINESINS		16	0.51144	1.33827	0.128846	0.281105	1	2165	tags=44%, list=19%, signal=54%
PID_IL1_PATHWAY	PID_IL1_PATHWAY		32	0.433054	1.33823	0.104869	0.28095	1	2133	tags=31%, list=18%, signal=38%
GO_PROTEIN_LOCALIZATION_TO_CYTOSKELETON	GO_PROTEIN_LOCALIZATION_TO_CYTOSKELETON		22	0.468096	1.33813	0.107486	0.280905	1	2137	tags=41%, list=18%, signal=50%
GSE2770_IL12_AND_TGFB_ACT_VS_ACT_CD4_TCELL_48H_DN	GSE2770_IL12_AND_TGFB_ACT_VS_ACT_CD4_TCELL_48H_DN		158	0.329313	1.33799	0.0336879	0.280971	1	2627	tags=33%, list=23%, signal=42%
BERTUCCI_INVASIVE_CARCINOMA_DUCTAL_VS_LOBULAR_DN	BERTUCCI_INVASIVE_CARCINOMA_DUCTAL_VS_LOBULAR_DN		17	0.497968	1.33765	0.131579	0.281421	1	1522	tags=24%, list=13%, signal=27%
PROVENZANI_METASTASIS_UP	PROVENZANI_METASTASIS_UP		154	0.327741	1.33753	0.0123894	0.281426	1	2466	tags=32%, list=21%, signal=41%
GO_RNA_POLYMERASE_COMPLEX	GO_RNA_POLYMERASE_COMPLEX		112	0.344554	1.33752	0.0422018	0.281204	1	3278	tags=42%, list=28%, signal=58%
REACTOME_METABOLISM_OF_NUCLEOTIDES	REACTOME_METABOLISM_OF_NUCLEOTIDES		56	0.388956	1.33751	0.0970149	0.280967	1	2864	tags=41%, list=25%, signal=54%
GO_MOTOR_ACTIVITY	GO_MOTOR_ACTIVITY		73	0.364225	1.3373	0.0640569	0.281143	1	2776	tags=40%, list=24%, signal=52%
GSE9650_EFFECTOR_VS_MEMORY_CD8_TCELL_UP	GSE9650_EFFECTOR_VS_MEMORY_CD8_TCELL_UP		173	0.324672	1.33659	0.0190972	0.282342	1	2311	tags=31%, list=20%, signal=38%
GSE24634_TREG_VS_TCONV_POST_DAY10_IL4_CONVERSION_UP	GSE24634_TREG_VS_TCONV_POST_DAY10_IL4_CONVERSION_UP		180	0.322095	1.33659	0.0226481	0.282105	1	2363	tags=31%, list=20%, signal=38%
GSE27786_LIN_NEG_VS_CD8_TCELL_UP	GSE27786_LIN_NEG_VS_CD8_TCELL_UP		160	0.326811	1.33644	0.0260223	0.282159	1	3228	tags=43%, list=28%, signal=58%
GO_GUANOSINE_CONTAINING_COMPOUND_METABOLIC_PROCESS	GO_GUANOSINE_CONTAINING_COMPOUND_METABOLIC_PROCESS		35	0.429603	1.33569	0.0874317	0.283392	1	1382	tags=29%, list=12%, signal=32%
GO_PEPTIDYL_LYSINE_MODIFICATION	GO_PEPTIDYL_LYSINE_MODIFICATION		245	0.314713	1.3356	0.0187713	0.283317	1	2696	tags=31%, list=23%, signal=40%
NAKAMURA_CANCER_MICROENVIRONMENT_DN	NAKAMURA_CANCER_MICROENVIRONMENT_DN		43	0.406626	1.33499	0.0863309	0.284336	1	1658	tags=30%, list=14%, signal=35%
GO_MACROMOLECULE_DEACYLATION	GO_MACROMOLECULE_DEACYLATION		57	0.385354	1.33497	0.0780669	0.284156	1	634	tags=16%, list=5%, signal=17%
GSE17721_CTRL_VS_POLYIC_1H_BMDC_UP	GSE17721_CTRL_VS_POLYIC_1H_BMDC_UP		143	0.329306	1.33457	0.0337268	0.284746	1	2034	tags=24%, list=18%, signal=29%
GO_CHROMATIN_MODIFICATION	GO_CHROMATIN_MODIFICATION		414	0.293368	1.33414	0.00323102	0.285342	1	2542	tags=28%, list=22%, signal=35%
GO_CHROMATIN_BINDING	GO_CHROMATIN_BINDING		310	0.304653	1.33322	0.0119658	0.287046	1	2751	tags=33%, list=24%, signal=42%
GSE40685_NAIVE_CD4_TCELL_VS_TREG_UP	GSE40685_NAIVE_CD4_TCELL_VS_TREG_UP		130	0.334625	1.33307	0.0362694	0.287095	1	1263	tags=18%, list=11%, signal=20%
REACTOME_APOPTOTIC_EXECUTION_PHASE	REACTOME_APOPTOTIC_EXECUTION_PHASE		39	0.408933	1.33265	0.0902394	0.287716	1	1566	tags=28%, list=14%, signal=33%
SWEET_KRAS_TARGETS_UP	SWEET_KRAS_TARGETS_UP		57	0.387775	1.3326	0.0650995	0.28756	1	1769	tags=26%, list=15%, signal=31%
GSE29618_PRE_VS_DAY7_POST_TIV_FLU_VACCINE_BCELL_UP	GSE29618_PRE_VS_DAY7_POST_TIV_FLU_VACCINE_BCELL_UP		59	0.379068	1.33195	0.0636704	0.288639	1	3399	tags=44%, list=29%, signal=62%
GO_PYRIMIDINE_CONTAINING_COMPOUND_BIOSYNTHETIC_PROCESS	GO_PYRIMIDINE_CONTAINING_COMPOUND_BIOSYNTHETIC_PROCESS		31	0.442993	1.33184	0.0957643	0.288617	1	3213	tags=48%, list=28%, signal=67%
GO_REGULATION_OF_DNA_REPAIR	GO_REGULATION_OF_DNA_REPAIR		58	0.380201	1.33178	0.0750916	0.288498	1	1323	tags=19%, list=11%, signal=21%
CAIRO_HEPATOBLASTOMA_UP	CAIRO_HEPATOBLASTOMA_UP		163	0.3257	1.33144	0.0331588	0.288965	1	2487	tags=32%, list=21%, signal=40%
REACTOME_GLOBAL_GENOMIC_NER_GG_NER	REACTOME_GLOBAL_GENOMIC_NER_GG_NER		32	0.436075	1.33093	0.105634	0.289794	1	2237	tags=41%, list=19%, signal=50%
EGFR_UP.V1_DN	EGFR_UP.V1_DN		128	0.336709	1.33085	0.0465517	0.289717	1	1851	tags=26%, list=16%, signal=30%
GSE22432_PDC_VS_TGFB1_TREATEDCOMMON_DC_PROGENITOR_UP	GSE22432_PDC_VS_TGFB1_TREATEDCOMMON_DC_PROGENITOR_UP		175	0.321717	1.33061	0.0243478	0.289947	1	1692	tags=21%, list=15%, signal=24%
GSE2770_UNTREATED_VS_IL4_TREATED_ACT_CD4_TCELL_48H_DN	GSE2770_UNTREATED_VS_IL4_TREATED_ACT_CD4_TCELL_48H_DN		159	0.324367	1.33051	0.025974	0.289886	1	2405	tags=31%, list=21%, signal=39%
CHR15Q14	CHR15Q14		24	0.453167	1.33035	0.128857	0.289973	1	300	tags=17%, list=3%, signal=17%
GSE20366_EX_VIVO_VS_HOMEOSTATIC_CONVERSION_NAIVE_CD4_TCELL_UP	GSE20366_EX_VIVO_VS_HOMEOSTATIC_CONVERSION_NAIVE_CD4_TCELL_UP		156	0.325594	1.33033	0.0242634	0.289752	1	2546	tags=30%, list=22%, signal=38%
GO_LENS_DEVELOPMENT_IN_CAMERA_TYPE_EYE	GO_LENS_DEVELOPMENT_IN_CAMERA_TYPE_EYE		30	0.441147	1.33015	0.108499	0.289899	1	2241	tags=30%, list=19%, signal=37%
GSE40685_NAIVE_CD4_TCELL_VS_FOXP3_KO_TREG_PRECURSOR_UP	GSE40685_NAIVE_CD4_TCELL_VS_FOXP3_KO_TREG_PRECURSOR_UP		135	0.333229	1.32999	0.0353817	0.289981	1	1890	tags=25%, list=16%, signal=30%
GO_ANTEROGRADE_AXONAL_TRANSPORT	GO_ANTEROGRADE_AXONAL_TRANSPORT		17	0.504567	1.3299	0.1	0.289905	1	2595	tags=47%, list=22%, signal=61%
GSE3982_DC_VS_MAC_LPS_STIM_UP	GSE3982_DC_VS_MAC_LPS_STIM_UP		152	0.324556	1.32987	0.0357143	0.289715	1	1937	tags=20%, list=17%, signal=24%
GO_QUATERNARY_AMMONIUM_GROUP_BINDING	GO_QUATERNARY_AMMONIUM_GROUP_BINDING		18	0.49815	1.3296	0.13211	0.290061	1	1886	tags=39%, list=16%, signal=46%
GO_BETA_CATENIN_TCF_COMPLEX_ASSEMBLY	GO_BETA_CATENIN_TCF_COMPLEX_ASSEMBLY		32	0.429405	1.32892	0.100746	0.29123	1	1850	tags=38%, list=16%, signal=45%
GO_CILIARY_MEMBRANE	GO_CILIARY_MEMBRANE		32	0.419849	1.32872	0.114625	0.291415	1	2199	tags=28%, list=19%, signal=35%
ZHAN_MULTIPLE_MYELOMA_UP	ZHAN_MULTIPLE_MYELOMA_UP		55	0.385922	1.32858	0.0743363	0.291453	1	1457	tags=25%, list=13%, signal=29%
GSE3982_DC_VS_MAC_DN	GSE3982_DC_VS_MAC_DN		113	0.342143	1.32831	0.0419708	0.291765	1	2180	tags=30%, list=19%, signal=37%
GO_ORGAN_REGENERATION	GO_ORGAN_REGENERATION		55	0.379863	1.32829	0.0905588	0.291549	1	1767	tags=29%, list=15%, signal=34%
GSE21063_3H_VS_16H_ANTI_IGM_STIM_NFATC1_KOBCELL_DN	GSE21063_3H_VS_16H_ANTI_IGM_STIM_NFATC1_KOBCELL_DN		165	0.320494	1.32825	0.0331492	0.291402	1	2458	tags=33%, list=21%, signal=42%
FAELT_B_CLL_WITH_VH_REARRANGEMENTS_DN	FAELT_B_CLL_WITH_VH_REARRANGEMENTS_DN		43	0.400228	1.32822	0.0712946	0.291208	1	1894	tags=26%, list=16%, signal=30%
SHEN_SMARCA2_TARGETS_UP	SHEN_SMARCA2_TARGETS_UP		390	0.294143	1.32803	0.00331675	0.291379	1	2466	tags=28%, list=21%, signal=34%
GROSS_HYPOXIA_VIA_ELK3_AND_HIF1A_DN	GROSS_HYPOXIA_VIA_ELK3_AND_HIF1A_DN		83	0.358668	1.32777	0.050173	0.2917	1	1767	tags=22%, list=15%, signal=25%
GSE19923_HEB_KO_VS_HEB_AND_E2A_KO_DP_THYMOCYTE_UP	GSE19923_HEB_KO_VS_HEB_AND_E2A_KO_DP_THYMOCYTE_UP		170	0.321984	1.32758	0.0330435	0.291846	1	2579	tags=29%, list=22%, signal=37%
GO_TELOMERIC_DNA_BINDING	GO_TELOMERIC_DNA_BINDING		27	0.451958	1.32695	0.110721	0.292918	1	1954	tags=33%, list=17%, signal=40%
MORF_MAGEA8	MORF_MAGEA8		94	0.349553	1.32666	0.0630798	0.293252	1	2113	tags=24%, list=18%, signal=30%
GO_L_AMINO_ACID_TRANSMEMBRANE_TRANSPORTER_ACTIVITY	GO_L_AMINO_ACID_TRANSMEMBRANE_TRANSPORTER_ACTIVITY		23	0.460523	1.32642	0.106742	0.293516	1	642	tags=17%, list=6%, signal=18%
MODULE_17	MODULE_17		320	0.299431	1.32617	0.0110759	0.293795	1	2425	tags=33%, list=21%, signal=40%
GSE22601_CD4_SINGLE_POSITIVE_VS_CD8_SINGLE_POSITIVE_THYMOCYTE_UP	GSE22601_CD4_SINGLE_POSITIVE_VS_CD8_SINGLE_POSITIVE_THYMOCYTE_UP		173	0.323469	1.32556	0.0189655	0.29482	1	2403	tags=32%, list=21%, signal=40%
GAL_LEUKEMIC_STEM_CELL_DN	GAL_LEUKEMIC_STEM_CELL_DN		154	0.324394	1.32543	0.0238095	0.294823	1	1838	tags=27%, list=16%, signal=32%
GO_AMMONIUM_ION_BINDING	GO_AMMONIUM_ION_BINDING		23	0.462164	1.32501	0.118182	0.295458	1	2615	tags=43%, list=23%, signal=56%
MYCMAX_01	MYCMAX_01		164	0.322212	1.32497	0.0384615	0.295315	1	1507	tags=18%, list=13%, signal=20%
GSE6269_FLU_VS_STREP_PNEUMO_INF_PBMC_DN	GSE6269_FLU_VS_STREP_PNEUMO_INF_PBMC_DN		90	0.351831	1.32481	0.0496183	0.29542	1	2351	tags=29%, list=20%, signal=36%
GCM_GSTA4	GCM_GSTA4		50	0.389665	1.32428	0.0805861	0.296293	1	3475	tags=42%, list=30%, signal=60%
BERTUCCI_MEDULLARY_VS_DUCTAL_BREAST_CANCER_DN	BERTUCCI_MEDULLARY_VS_DUCTAL_BREAST_CANCER_DN		90	0.351494	1.32415	0.0456274	0.296286	1	2795	tags=39%, list=24%, signal=51%
GSE3920_IFNB_VS_IFNG_TREATED_ENDOTHELIAL_CELL_UP	GSE3920_IFNB_VS_IFNG_TREATED_ENDOTHELIAL_CELL_UP		108	0.340596	1.32404	0.051756	0.296269	1	2253	tags=30%, list=19%, signal=36%
GSE37532_TREG_VS_TCONV_PPARG_KO_CD4_TCELL_FROM_LN_UP	GSE37532_TREG_VS_TCONV_PPARG_KO_CD4_TCELL_FROM_LN_UP		173	0.318939	1.32364	0.0242634	0.29686	1	2177	tags=25%, list=19%, signal=31%
GO_METALLOPEPTIDASE_ACTIVITY	GO_METALLOPEPTIDASE_ACTIVITY		72	0.36593	1.32301	0.0682657	0.29795	1	2068	tags=26%, list=18%, signal=32%
CHANG_CORE_SERUM_RESPONSE_UP	CHANG_CORE_SERUM_RESPONSE_UP		175	0.320798	1.32276	0.025641	0.298213	1	2201	tags=26%, list=19%, signal=32%
REACTOME_RNA_POL_II_TRANSCRIPTION_PRE_INITIATION_AND_PROMOTER_OPENING	REACTOME_RNA_POL_II_TRANSCRIPTION_PRE_INITIATION_AND_PROMOTER_OPENING		39	0.414308	1.32247	0.0841121	0.298631	1	2685	tags=36%, list=23%, signal=47%
GSE26351_WNT_VS_BMP_PATHWAY_STIM_HEMATOPOIETIC_PROGENITORS_UP	GSE26351_WNT_VS_BMP_PATHWAY_STIM_HEMATOPOIETIC_PROGENITORS_UP		129	0.330877	1.32197	0.0353982	0.299472	1	2212	tags=28%, list=19%, signal=34%
GSE13547_WT_VS_ZFX_KO_BCELL_ANTI_IGM_STIM_12H_DN	GSE13547_WT_VS_ZFX_KO_BCELL_ANTI_IGM_STIM_12H_DN		93	0.346692	1.32192	0.0503356	0.299321	1	1628	tags=20%, list=14%, signal=24%
SANA_TNF_SIGNALING_DN	SANA_TNF_SIGNALING_DN		53	0.386742	1.32176	0.0748175	0.299413	1	1966	tags=28%, list=17%, signal=34%
GSE43863_TH1_VS_LY6C_INT_CXCR5POS_EFFECTOR_CD4_TCELL_UP	GSE43863_TH1_VS_LY6C_INT_CXCR5POS_EFFECTOR_CD4_TCELL_UP		167	0.322493	1.32159	0.0291595	0.299519	1	2740	tags=29%, list=24%, signal=38%
GO_NEGATIVE_REGULATION_OF_TELOMERE_MAINTENANCE	GO_NEGATIVE_REGULATION_OF_TELOMERE_MAINTENANCE		24	0.452175	1.32138	0.139147	0.299751	1	3267	tags=54%, list=28%, signal=75%
GO_PROTEIN_ACETYLATION	GO_PROTEIN_ACETYLATION		96	0.344306	1.32111	0.0557491	0.30007	1	2045	tags=23%, list=18%, signal=28%
MORF_ATOX1	MORF_ATOX1		77	0.357038	1.32101	0.067029	0.300034	1	2048	tags=29%, list=18%, signal=34%
GO_POSITIVE_REGULATION_OF_CELL_CYCLE_ARREST	GO_POSITIVE_REGULATION_OF_CELL_CYCLE_ARREST		65	0.372651	1.32096	0.0853432	0.299882	1	1807	tags=28%, list=16%, signal=33%
GO_RNA_POLYADENYLATION	GO_RNA_POLYADENYLATION		26	0.44764	1.32048	0.120219	0.300645	1	2355	tags=35%, list=20%, signal=43%
HOLLEMAN_PREDNISOLONE_RESISTANCE_ALL_UP	HOLLEMAN_PREDNISOLONE_RESISTANCE_ALL_UP		18	0.493871	1.32038	0.137803	0.300641	1	2053	tags=39%, list=18%, signal=47%
GSE24671_BAKIMULC_VS_SENDAI_VIRUS_INFECTED_MOUSE_SPLENOCYTES_UP	GSE24671_BAKIMULC_VS_SENDAI_VIRUS_INFECTED_MOUSE_SPLENOCYTES_UP		164	0.325903	1.32024	0.042328	0.300698	1	1520	tags=22%, list=13%, signal=25%
GSE7509_DC_VS_MONOCYTE_WITH_FCGRIIB_STIM_UP	GSE7509_DC_VS_MONOCYTE_WITH_FCGRIIB_STIM_UP		170	0.320852	1.31939	0.0340715	0.302278	1	2476	tags=29%, list=21%, signal=36%
MORF_PTPRB	MORF_PTPRB		101	0.343246	1.31918	0.0462633	0.302467	1	2113	tags=23%, list=18%, signal=28%
GO_NUCLEAR_EXPORT	GO_NUCLEAR_EXPORT		130	0.329408	1.31905	0.0377359	0.302504	1	3505	tags=38%, list=30%, signal=55%
GO_REGULATION_OF_MICROTUBULE_BASED_PROCESS	GO_REGULATION_OF_MICROTUBULE_BASED_PROCESS		181	0.316031	1.31897	0.0285714	0.302403	1	3145	tags=41%, list=27%, signal=55%
REACTOME_SIGNALING_BY_ERBB4	REACTOME_SIGNALING_BY_ERBB4		66	0.371149	1.31871	0.0797774	0.302703	1	1756	tags=23%, list=15%, signal=27%
GSE3982_MAST_CELL_VS_TH1_DN	GSE3982_MAST_CELL_VS_TH1_DN		161	0.31992	1.31783	0.040493	0.304345	1	1885	tags=24%, list=16%, signal=29%
GSE19888_CTRL_VS_A3R_INHIBITOR_TREATED_MAST_CELL_UP	GSE19888_CTRL_VS_A3R_INHIBITOR_TREATED_MAST_CELL_UP		175	0.31924	1.31777	0.0402685	0.304219	1	1974	tags=26%, list=17%, signal=31%
GO_RRNA_MODIFICATION	GO_RRNA_MODIFICATION		23	0.455493	1.31752	0.135135	0.304513	1	2392	tags=39%, list=21%, signal=49%
GSE9960_GRAM_NEG_VS_GRAM_NEG_AND_POS_SEPSIS_PBMC_DN	GSE9960_GRAM_NEG_VS_GRAM_NEG_AND_POS_SEPSIS_PBMC_DN		160	0.324028	1.31725	0.0458404	0.304842	1	2903	tags=34%, list=25%, signal=45%
GSE16522_ANTI_CD3CD28_STIM_VS_UNSTIM_NAIVE_CD8_TCELL_UP	GSE16522_ANTI_CD3CD28_STIM_VS_UNSTIM_NAIVE_CD8_TCELL_UP		130	0.335577	1.31725	0.0389381	0.304596	1	1424	tags=20%, list=12%, signal=23%
CAIRO_PML_TARGETS_BOUND_BY_MYC_UP	CAIRO_PML_TARGETS_BOUND_BY_MYC_UP		20	0.472224	1.31696	0.122744	0.304973	1	1827	tags=30%, list=16%, signal=36%
MORF_TERF2IP	MORF_TERF2IP		107	0.34035	1.31693	0.0565371	0.304799	1	2598	tags=33%, list=22%, signal=42%
GSE22611_NOD2_VS_MUTANT_NOD2_TRANSDUCED_HEK293T_CELL_UP	GSE22611_NOD2_VS_MUTANT_NOD2_TRANSDUCED_HEK293T_CELL_UP		141	0.329862	1.31682	0.0480592	0.304774	1	2098	tags=29%, list=18%, signal=35%
GO_PYRIMIDINE_NUCLEOTIDE_METABOLIC_PROCESS	GO_PYRIMIDINE_NUCLEOTIDE_METABOLIC_PROCESS		37	0.413282	1.31674	0.11306	0.304699	1	1642	tags=24%, list=14%, signal=28%
GO_CARBON_CARBON_LYASE_ACTIVITY	GO_CARBON_CARBON_LYASE_ACTIVITY		38	0.413664	1.31653	0.10223	0.304887	1	1489	tags=21%, list=13%, signal=24%
GO_CENTROSOME_CYCLE	GO_CENTROSOME_CYCLE		39	0.409602	1.31651	0.0983302	0.304684	1	2165	tags=36%, list=19%, signal=44%
BILANGES_RAPAMYCIN_SENSITIVE_VIA_TSC1_AND_TSC2	BILANGES_RAPAMYCIN_SENSITIVE_VIA_TSC1_AND_TSC2		65	0.372938	1.31648	0.0621572	0.304492	1	1818	tags=28%, list=16%, signal=33%
WANG_TARGETS_OF_MLL_CBP_FUSION_DN	WANG_TARGETS_OF_MLL_CBP_FUSION_DN		41	0.405696	1.31588	0.0972763	0.305519	1	1759	tags=24%, list=15%, signal=29%
ACTAYRNNNCCCR_UNKNOWN	ACTAYRNNNCCCR_UNKNOWN		364	0.293085	1.31574	0.00355872	0.305577	1	2725	tags=31%, list=24%, signal=40%
GSE46606_UNSTIM_VS_CD40L_IL2_IL5_1DAY_STIMULATED_IRF4MID_SORTED_BCELL_DN	GSE46606_UNSTIM_VS_CD40L_IL2_IL5_1DAY_STIMULATED_IRF4MID_SORTED_BCELL_DN		89	0.347133	1.31558	0.0561594	0.305666	1	2161	tags=29%, list=19%, signal=36%
VANOEVELEN_MYOGENESIS_SIN3A_TARGETS	VANOEVELEN_MYOGENESIS_SIN3A_TARGETS		180	0.315938	1.31549	0.0236088	0.305611	1	1976	tags=22%, list=17%, signal=26%
E2F_Q2	E2F_Q2		118	0.333738	1.31492	0.0541012	0.306618	1	2249	tags=25%, list=19%, signal=31%
HOLLEMAN_VINCRISTINE_RESISTANCE_B_ALL_DN	HOLLEMAN_VINCRISTINE_RESISTANCE_B_ALL_DN		15	0.502565	1.31472	0.122047	0.306807	1	2740	tags=53%, list=24%, signal=70%
GO_NUCLEOTIDE_EXCISION_REPAIR_DNA_INCISION	GO_NUCLEOTIDE_EXCISION_REPAIR_DNA_INCISION		37	0.412578	1.3145	0.109023	0.30705	1	2821	tags=38%, list=24%, signal=50%
GO_NEGATIVE_REGULATION_OF_EXTRINSIC_APOPTOTIC_SIGNALING_PATHWAY_VIA_DEATH_DOMAIN_RECEPTORS	GO_NEGATIVE_REGULATION_OF_EXTRINSIC_APOPTOTIC_SIGNALING_PATHWAY_VIA_DEATH_DOMAIN_RECEPTORS		25	0.449783	1.31432	0.105166	0.307145	1	1034	tags=20%, list=9%, signal=22%
CHRXQ28	CHRXQ28		48	0.395636	1.31369	0.107143	0.308239	1	1782	tags=27%, list=15%, signal=32%
GSE5589_WT_VS_IL10_KO_LPS_AND_IL6_STIM_MACROPHAGE_45MIN_DN	GSE5589_WT_VS_IL10_KO_LPS_AND_IL6_STIM_MACROPHAGE_45MIN_DN		109	0.343839	1.31365	0.0596745	0.308069	1	1714	tags=25%, list=15%, signal=29%
GSE6269_HEALTHY_VS_STAPH_PNEUMO_INF_PBMC_UP	GSE6269_HEALTHY_VS_STAPH_PNEUMO_INF_PBMC_UP		153	0.324557	1.31348	0.0466786	0.308157	1	2531	tags=30%, list=22%, signal=38%
GO_ARP2_3_COMPLEX_MEDIATED_ACTIN_NUCLEATION	GO_ARP2_3_COMPLEX_MEDIATED_ACTIN_NUCLEATION		16	0.506058	1.31342	0.141199	0.308023	1	2890	tags=44%, list=25%, signal=58%
BERNARD_PPAPDC1B_TARGETS_UP	BERNARD_PPAPDC1B_TARGETS_UP		32	0.42375	1.31294	0.11883	0.3088	1	2285	tags=38%, list=20%, signal=47%
GSE17721_CTRL_VS_POLYIC_12H_BMDC_UP	GSE17721_CTRL_VS_POLYIC_12H_BMDC_UP		170	0.320067	1.31283	0.0287648	0.308816	1	2406	tags=29%, list=21%, signal=36%
GSE40493_BCL6_KO_VS_WT_TREG_UP	GSE40493_BCL6_KO_VS_WT_TREG_UP		153	0.323626	1.31265	0.0365854	0.308961	1	2553	tags=29%, list=22%, signal=36%
GSE2770_UNTREATED_VS_IL4_TREATED_ACT_CD4_TCELL_2H_DN	GSE2770_UNTREATED_VS_IL4_TREATED_ACT_CD4_TCELL_2H_DN		162	0.321	1.31229	0.0383944	0.309463	1	3083	tags=33%, list=27%, signal=44%
ACTWSNACTNY_UNKNOWN	ACTWSNACTNY_UNKNOWN		77	0.357616	1.31201	0.0687161	0.309831	1	2581	tags=32%, list=22%, signal=42%
MORF_CDC16	MORF_CDC16		67	0.365977	1.31198	0.0875233	0.30964	1	1997	tags=30%, list=17%, signal=36%
GO_CONDENSED_NUCLEAR_CHROMOSOME	GO_CONDENSED_NUCLEAR_CHROMOSOME		58	0.376669	1.31186	0.0910714	0.309666	1	3739	tags=52%, list=32%, signal=76%
NAKAYAMA_FGF2_TARGETS	NAKAYAMA_FGF2_TARGETS		15	0.504048	1.3118	0.151093	0.309521	1	1964	tags=53%, list=17%, signal=64%
GO_NEGATIVE_REGULATION_OF_ORGANELLE_ASSEMBLY	GO_NEGATIVE_REGULATION_OF_ORGANELLE_ASSEMBLY		19	0.476367	1.31171	0.131827	0.309474	1	2074	tags=42%, list=18%, signal=51%
AR_02	AR_02		24	0.453701	1.31045	0.13587	0.311983	1	1013	tags=13%, list=9%, signal=14%
BRCA1_DN.V1_UP	BRCA1_DN.V1_UP		37	0.406903	1.31015	0.104673	0.312413	1	164	tags=8%, list=1%, signal=8%
MORF_GSPT1	MORF_GSPT1		49	0.391142	1.30996	0.102515	0.312605	1	2482	tags=35%, list=21%, signal=44%
CHR15Q26	CHR15Q26		39	0.407509	1.30994	0.0970874	0.312395	1	1562	tags=28%, list=13%, signal=32%
GSE40274_CTRL_VS_FOXP3_AND_GATA1_TRANSDUCED_ACTIVATED_CD4_TCELL_DN	GSE40274_CTRL_VS_FOXP3_AND_GATA1_TRANSDUCED_ACTIVATED_CD4_TCELL_DN		81	0.355523	1.30983	0.0714286	0.312407	1	1437	tags=26%, list=12%, signal=29%
GSE5542_IFNA_VS_IFNA_AND_IFNG_TREATED_EPITHELIAL_CELLS_6H_UP	GSE5542_IFNA_VS_IFNA_AND_IFNG_TREATED_EPITHELIAL_CELLS_6H_UP		135	0.326222	1.3098	0.0618375	0.312219	1	1794	tags=24%, list=15%, signal=28%
MORF_DCC	MORF_DCC		46	0.394066	1.30978	0.0981818	0.312012	1	2690	tags=43%, list=23%, signal=56%
GSE11961_MARGINAL_ZONE_BCELL_VS_GERMINAL_CENTER_BCELL_DAY7_DN	GSE11961_MARGINAL_ZONE_BCELL_VS_GERMINAL_CENTER_BCELL_DAY7_DN		154	0.320905	1.30936	0.0434783	0.312709	1	1634	tags=22%, list=14%, signal=25%
KYNG_WERNER_SYNDROM_DN	KYNG_WERNER_SYNDROM_DN		21	0.473549	1.30916	0.144981	0.312889	1	1587	tags=33%, list=14%, signal=39%
MORF_SUPT3H	MORF_SUPT3H		127	0.328357	1.30717	0.0548673	0.316996	1	2113	tags=23%, list=18%, signal=28%
GSE45365_CD8A_DC_VS_CD11B_DC_DN	GSE45365_CD8A_DC_VS_CD11B_DC_DN		154	0.31942	1.30666	0.0454545	0.317937	1	1738	tags=25%, list=15%, signal=29%
GSE2585_THYMIC_DC_VS_THYMIC_MACROPHAGE_DN	GSE2585_THYMIC_DC_VS_THYMIC_MACROPHAGE_DN		143	0.326003	1.30641	0.0383275	0.31825	1	2570	tags=30%, list=22%, signal=38%
KENNY_CTNNB1_TARGETS_DN	KENNY_CTNNB1_TARGETS_DN		40	0.39558	1.30639	0.112245	0.318034	1	2732	tags=40%, list=24%, signal=52%
CONCANNON_APOPTOSIS_BY_EPOXOMICIN_DN	CONCANNON_APOPTOSIS_BY_EPOXOMICIN_DN		127	0.328555	1.30632	0.0562181	0.317935	1	1756	tags=24%, list=15%, signal=28%
GO_PROTEIN_MONOUBIQUITINATION	GO_PROTEIN_MONOUBIQUITINATION		41	0.399527	1.30629	0.0732601	0.317741	1	3378	tags=41%, list=29%, signal=58%
MODULE_159	MODULE_159		77	0.359254	1.30627	0.0622642	0.317531	1	1598	tags=25%, list=14%, signal=28%
GSE21033_3H_VS_24H_POLYIC_STIM_DC_DN	GSE21033_3H_VS_24H_POLYIC_STIM_DC_DN		102	0.337326	1.30613	0.0671378	0.317587	1	1739	tags=25%, list=15%, signal=29%
GO_PROTEIN_ACYLATION	GO_PROTEIN_ACYLATION		121	0.330758	1.30608	0.0454545	0.317463	1	3332	tags=36%, list=29%, signal=51%
GSE37533_PPARG1_FOXP3_VS_PPARG2_FOXP3_TRANSDUCED_CD4_TCELL_PIOGLITAZONE_TREATED_UP	GSE37533_PPARG1_FOXP3_VS_PPARG2_FOXP3_TRANSDUCED_CD4_TCELL_PIOGLITAZONE_TREATED_UP		143	0.326911	1.30607	0.0517241	0.317238	1	1271	tags=19%, list=11%, signal=21%
GO_TBP_CLASS_PROTEIN_BINDING	GO_TBP_CLASS_PROTEIN_BINDING		19	0.476435	1.30591	0.166038	0.317316	1	2522	tags=32%, list=22%, signal=40%
GO_ACETYLTRANSFERASE_COMPLEX	GO_ACETYLTRANSFERASE_COMPLEX		79	0.350484	1.30553	0.0749543	0.317912	1	3268	tags=43%, list=28%, signal=60%
GSE36527_CD62L_HIGH_CD69_NEG_VS_CD62L_LOW_CD69_POS_TREG_KLRG1_NEG_UP	GSE36527_CD62L_HIGH_CD69_NEG_VS_CD62L_LOW_CD69_POS_TREG_KLRG1_NEG_UP		141	0.32099	1.3055	0.037234	0.31773	1	2210	tags=26%, list=19%, signal=31%
GALE_APL_WITH_FLT3_MUTATED_UP	GALE_APL_WITH_FLT3_MUTATED_UP		50	0.392008	1.30541	0.105903	0.31769	1	2434	tags=40%, list=21%, signal=50%
GSE12003_MIR223_KO_VS_WT_BM_PROGENITOR_4D_CULTURE_DN	GSE12003_MIR223_KO_VS_WT_BM_PROGENITOR_4D_CULTURE_DN		91	0.344425	1.30517	0.0583942	0.317962	1	2324	tags=29%, list=20%, signal=35%
GSE19923_E2A_KO_VS_E2A_AND_HEB_KO_DP_THYMOCYTE_UP	GSE19923_E2A_KO_VS_E2A_AND_HEB_KO_DP_THYMOCYTE_UP		162	0.320008	1.30502	0.0344828	0.318019	1	2620	tags=31%, list=23%, signal=40%
GSE3982_DC_VS_NEUTROPHIL_LPS_STIM_UP	GSE3982_DC_VS_NEUTROPHIL_LPS_STIM_UP		172	0.316797	1.30499	0.033101	0.317838	1	1741	tags=22%, list=15%, signal=26%
MODULE_493	MODULE_493		48	0.380128	1.30428	0.103131	0.319165	1	2711	tags=38%, list=23%, signal=49%
GSE21670_UNTREATED_VS_TGFB_IL6_TREATED_STAT3_KO_CD4_TCELL_UP	GSE21670_UNTREATED_VS_TGFB_IL6_TREATED_STAT3_KO_CD4_TCELL_UP		170	0.318036	1.30422	0.0369004	0.319056	1	2619	tags=36%, list=23%, signal=46%
GSE9037_WT_VS_IRAK4_KO_LPS_4H_STIM_BMDM_DN	GSE9037_WT_VS_IRAK4_KO_LPS_4H_STIM_BMDM_DN		131	0.325614	1.30412	0.0355872	0.319006	1	1324	tags=17%, list=11%, signal=19%
IVANOVA_HEMATOPOIESIS_EARLY_PROGENITOR	IVANOVA_HEMATOPOIESIS_EARLY_PROGENITOR		401	0.287772	1.30405	0.0170068	0.318926	1	2473	tags=27%, list=21%, signal=34%
GSE29618_PRE_VS_DAY7_POST_TIV_FLU_VACCINE_BCELL_DN	GSE29618_PRE_VS_DAY7_POST_TIV_FLU_VACCINE_BCELL_DN		164	0.316007	1.30402	0.0316901	0.318736	1	2062	tags=27%, list=18%, signal=33%
DAIRKEE_CANCER_PRONE_RESPONSE_BPA	DAIRKEE_CANCER_PRONE_RESPONSE_BPA		42	0.396413	1.30367	0.10772	0.319282	1	2752	tags=36%, list=24%, signal=47%
GO_CENTRIOLE	GO_CENTRIOLE		76	0.356942	1.30344	0.0566728	0.31953	1	2089	tags=34%, list=18%, signal=41%
GSE360_L_DONOVANI_VS_T_GONDII_MAC_DN	GSE360_L_DONOVANI_VS_T_GONDII_MAC_DN		159	0.319588	1.3034	0.0416667	0.319365	1	1779	tags=25%, list=15%, signal=29%
GSE22432_CONVENTIONAL_CDC_VS_PLASMACYTOID_PDC_UP	GSE22432_CONVENTIONAL_CDC_VS_PLASMACYTOID_PDC_UP		168	0.317666	1.3033	0.035473	0.319339	1	2691	tags=33%, list=23%, signal=42%
GO_REGULATION_OF_MITOTIC_CELL_CYCLE	GO_REGULATION_OF_MITOTIC_CELL_CYCLE		367	0.290616	1.30324	0.0066778	0.319219	1	2655	tags=32%, list=23%, signal=40%
GO_POSITIVE_REGULATION_OF_CELL_DIVISION	GO_POSITIVE_REGULATION_OF_CELL_DIVISION		70	0.358456	1.30317	0.0842294	0.31913	1	2335	tags=36%, list=20%, signal=44%
GSE18281_SUBCAPSULAR_CORTICAL_REGION_VS_WHOLE_CORTEX_THYMUS_DN	GSE18281_SUBCAPSULAR_CORTICAL_REGION_VS_WHOLE_CORTEX_THYMUS_DN		106	0.337233	1.30308	0.0751445	0.319089	1	1956	tags=25%, list=17%, signal=30%
KRIEG_KDM3A_TARGETS_NOT_HYPOXIA	KRIEG_KDM3A_TARGETS_NOT_HYPOXIA		165	0.314174	1.30305	0.0333333	0.318898	1	1716	tags=22%, list=15%, signal=25%
REACTOME_G1_S_TRANSITION	REACTOME_G1_S_TRANSITION		103	0.344853	1.30259	0.0615942	0.319671	1	2997	tags=43%, list=26%, signal=57%
QUINTENS_EMBRYONIC_BRAIN_RESPONSE_TO_IR	QUINTENS_EMBRYONIC_BRAIN_RESPONSE_TO_IR		55	0.373337	1.30249	0.093985	0.31964	1	2015	tags=27%, list=17%, signal=33%
GNF2_FBL	GNF2_FBL		139	0.324874	1.30207	0.0588235	0.320327	1	2722	tags=32%, list=24%, signal=42%
SENGUPTA_NASOPHARYNGEAL_CARCINOMA_UP	SENGUPTA_NASOPHARYNGEAL_CARCINOMA_UP		230	0.303412	1.3019	0.00859107	0.320466	1	2214	tags=27%, list=19%, signal=33%
GSE37534_GW1929_VS_ROSIGLITAZONE_TREATED_CD4_TCELL_PPARG1_FOXP3_TRANSDUCED_DN	GSE37534_GW1929_VS_ROSIGLITAZONE_TREATED_CD4_TCELL_PPARG1_FOXP3_TRANSDUCED_DN		126	0.325837	1.30184	0.0554562	0.320325	1	1755	tags=25%, list=15%, signal=29%
GSE8835_CD4_VS_CD8_TCELL_DN	GSE8835_CD4_VS_CD8_TCELL_DN		77	0.354599	1.30148	0.0775047	0.320903	1	1053	tags=14%, list=9%, signal=16%
GSE6092_UNSTIM_VS_IFNG_STIM_AND_B_BURGDORFERI_INF_ENDOTHELIAL_CELL_UP	GSE6092_UNSTIM_VS_IFNG_STIM_AND_B_BURGDORFERI_INF_ENDOTHELIAL_CELL_UP		143	0.320194	1.3012	0.0418182	0.321296	1	1741	tags=22%, list=15%, signal=26%
CHIARADONNA_NEOPLASTIC_TRANSFORMATION_CDC25_UP	CHIARADONNA_NEOPLASTIC_TRANSFORMATION_CDC25_UP		69	0.363774	1.30115	0.0834846	0.321155	1	1233	tags=22%, list=11%, signal=24%
CHR11P11	CHR11P11		26	0.438244	1.30048	0.132616	0.322377	1	3674	tags=46%, list=32%, signal=67%
GO_REGULATION_OF_CELL_CYCLE_G2_M_PHASE_TRANSITION	GO_REGULATION_OF_CELL_CYCLE_G2_M_PHASE_TRANSITION		43	0.395835	1.3002	0.115028	0.322749	1	2399	tags=42%, list=21%, signal=53%
GSE29618_MONOCYTE_VS_MDC_DN	GSE29618_MONOCYTE_VS_MDC_DN		164	0.313636	1.30018	0.0330275	0.322543	1	2455	tags=27%, list=21%, signal=34%
RFX1_02	RFX1_02		160	0.315989	1.30015	0.0464684	0.322349	1	2129	tags=23%, list=18%, signal=27%
GCM_RAD21	GCM_RAD21		35	0.410635	1.29962	0.122936	0.323331	1	2910	tags=49%, list=25%, signal=65%
REACTOME_RNA_POL_III_TRANSCRIPTION_TERMINATION	REACTOME_RNA_POL_III_TRANSCRIPTION_TERMINATION		18	0.479899	1.29921	0.158379	0.324025	1	2685	tags=50%, list=23%, signal=65%
CHR5Q33	CHR5Q33		25	0.446509	1.29911	0.131179	0.324006	1	1696	tags=36%, list=15%, signal=42%
CHR2Q24	CHR2Q24		17	0.503148	1.29903	0.159696	0.323933	1	964	tags=35%, list=8%, signal=38%
JOHNSTONE_PARVB_TARGETS_2_DN	JOHNSTONE_PARVB_TARGETS_2_DN		268	0.2961	1.29899	0.0240137	0.323751	1	2616	tags=31%, list=23%, signal=39%
GO_LIGAND_GATED_CHANNEL_ACTIVITY	GO_LIGAND_GATED_CHANNEL_ACTIVITY		37	0.405934	1.29896	0.108411	0.323584	1	885	tags=14%, list=8%, signal=15%
NGO_MALIGNANT_GLIOMA_1P_LOH	NGO_MALIGNANT_GLIOMA_1P_LOH		16	0.497236	1.29881	0.137291	0.323659	1	2883	tags=50%, list=25%, signal=66%
GSE3982_NKCELL_VS_TH1_DN	GSE3982_NKCELL_VS_TH1_DN		176	0.313412	1.29833	0.037234	0.324503	1	1609	tags=25%, list=14%, signal=29%
MODULE_205	MODULE_205		167	0.316019	1.298	0.0398613	0.325004	1	2206	tags=25%, list=19%, signal=30%
GO_RNA_PHOSPHODIESTER_BOND_HYDROLYSIS	GO_RNA_PHOSPHODIESTER_BOND_HYDROLYSIS		96	0.337617	1.2977	0.083779	0.325398	1	3260	tags=43%, list=28%, signal=59%
TSENG_ADIPOGENIC_POTENTIAL_DN	TSENG_ADIPOGENIC_POTENTIAL_DN		20	0.464834	1.29726	0.144213	0.326154	1	1178	tags=25%, list=10%, signal=28%
GSE557_CIITA_KO_VS_I_AB_KO_DC_DN	GSE557_CIITA_KO_VS_I_AB_KO_DC_DN		159	0.319944	1.29711	0.0314815	0.326239	1	2910	tags=36%, list=25%, signal=48%
MODULE_3	MODULE_3		323	0.292187	1.29667	0.0171821	0.327011	1	1894	tags=25%, list=16%, signal=30%
JISON_SICKLE_CELL_DISEASE_DN	JISON_SICKLE_CELL_DISEASE_DN		153	0.318838	1.29667	0.0567766	0.326762	1	2773	tags=36%, list=24%, signal=47%
GO_TRNA_METHYLATION	GO_TRNA_METHYLATION		19	0.469078	1.29646	0.12782	0.326984	1	1909	tags=26%, list=16%, signal=31%
GO_CYTOPLASMIC_TRANSLATION	GO_CYTOPLASMIC_TRANSLATION		40	0.406155	1.29616	0.121442	0.327404	1	2692	tags=40%, list=23%, signal=52%
CHIARADONNA_NEOPLASTIC_TRANSFORMATION_KRAS_UP	CHIARADONNA_NEOPLASTIC_TRANSFORMATION_KRAS_UP		93	0.342706	1.29545	0.0653357	0.328766	1	1299	tags=23%, list=11%, signal=25%
GSE2197_CPG_DNA_VS_UNTREATED_IN_DC_DN	GSE2197_CPG_DNA_VS_UNTREATED_IN_DC_DN		157	0.318889	1.29527	0.045045	0.328951	1	2709	tags=32%, list=23%, signal=42%
GSE1925_3H_VS_24H_IFNG_STIM_IFNG_PRIMED_MACROPHAGE_DN	GSE1925_3H_VS_24H_IFNG_STIM_IFNG_PRIMED_MACROPHAGE_DN		159	0.314499	1.29522	0.0436364	0.328811	1	1890	tags=27%, list=16%, signal=32%
WEI_MIR34A_TARGETS	WEI_MIR34A_TARGETS		116	0.332727	1.29516	0.0638686	0.328694	1	2665	tags=31%, list=23%, signal=40%
GSE20754_WT_VS_TCF1_KO_MEMORY_CD8_TCELL_DN	GSE20754_WT_VS_TCF1_KO_MEMORY_CD8_TCELL_DN		160	0.318285	1.29465	0.049236	0.32957	1	3014	tags=33%, list=26%, signal=44%
GSE9509_10MIN_VS_30MIN_LPS_AND_IL10_STIM_IL10_KO_MACROPHAGE_UP	GSE9509_10MIN_VS_30MIN_LPS_AND_IL10_STIM_IL10_KO_MACROPHAGE_UP		150	0.321981	1.29458	0.0463918	0.329486	1	2018	tags=27%, list=17%, signal=33%
GO_NEGATIVE_REGULATION_OF_CELL_CYCLE_PHASE_TRANSITION	GO_NEGATIVE_REGULATION_OF_CELL_CYCLE_PHASE_TRANSITION		119	0.329773	1.29452	0.0666667	0.329355	1	2645	tags=38%, list=23%, signal=49%
GSE18281_SUBCAPSULAR_CORTICAL_REGION_VS_WHOLE_MEDULLA_THYMUS_UP	GSE18281_SUBCAPSULAR_CORTICAL_REGION_VS_WHOLE_MEDULLA_THYMUS_UP		137	0.322961	1.29439	0.0540037	0.329412	1	2586	tags=29%, list=22%, signal=37%
REACTOME_DOUBLE_STRAND_BREAK_REPAIR	REACTOME_DOUBLE_STRAND_BREAK_REPAIR		19	0.472422	1.29437	0.1423	0.329203	1	2132	tags=47%, list=18%, signal=58%
RHEIN_ALL_GLUCOCORTICOID_THERAPY_DN	RHEIN_ALL_GLUCOCORTICOID_THERAPY_DN		328	0.290893	1.29404	0.0184564	0.329716	1	2487	tags=34%, list=21%, signal=42%
GO_STEM_CELL_PROLIFERATION	GO_STEM_CELL_PROLIFERATION		26	0.439085	1.29394	0.125683	0.329669	1	3111	tags=38%, list=27%, signal=52%
GSE21546_SAP1A_KO_VS_SAP1A_KO_AND_ELK1_KO_ANTI_CD3_STIM_DP_THYMOCYTES_UP	GSE21546_SAP1A_KO_VS_SAP1A_KO_AND_ELK1_KO_ANTI_CD3_STIM_DP_THYMOCYTES_UP		144	0.317514	1.29341	0.0556586	0.330639	1	2684	tags=31%, list=23%, signal=39%
GO_RESPONSE_TO_COCAINE	GO_RESPONSE_TO_COCAINE		22	0.458072	1.29282	0.156648	0.331722	1	1433	tags=23%, list=12%, signal=26%
REACTOME_APOPTOTIC_CLEAVAGE_OF_CELLULAR_PROTEINS	REACTOME_APOPTOTIC_CLEAVAGE_OF_CELLULAR_PROTEINS		25	0.444003	1.29248	0.130755	0.332228	1	1566	tags=32%, list=14%, signal=37%
GO_INTERMEDIATE_FILAMENT_CYTOSKELETON	GO_INTERMEDIATE_FILAMENT_CYTOSKELETON		65	0.361164	1.29191	0.0907473	0.33331	1	1624	tags=18%, list=14%, signal=21%
GSE22527_ANTI_CD3_INVIVO_VS_UNTREATED_MOUSE_TREG_DN	GSE22527_ANTI_CD3_INVIVO_VS_UNTREATED_MOUSE_TREG_DN		177	0.311853	1.29165	0.0371025	0.333648	1	2806	tags=33%, list=24%, signal=43%
MOHANKUMAR_HOXA1_TARGETS_UP	MOHANKUMAR_HOXA1_TARGETS_UP		327	0.288696	1.29164	0.0233393	0.333405	1	1917	tags=23%, list=17%, signal=27%
GSE40274_CTRL_VS_FOXP3_AND_LEF1_TRANSDUCED_ACTIVATED_CD4_TCELL_DN	GSE40274_CTRL_VS_FOXP3_AND_LEF1_TRANSDUCED_ACTIVATED_CD4_TCELL_DN		119	0.328546	1.2915	0.0612613	0.333484	1	1995	tags=24%, list=17%, signal=29%
GSE18791_CTRL_VS_NEWCASTLE_VIRUS_DC_4H_UP	GSE18791_CTRL_VS_NEWCASTLE_VIRUS_DC_4H_UP		157	0.316283	1.29128	0.0478821	0.333715	1	2714	tags=32%, list=23%, signal=42%
KEGG_HEDGEHOG_SIGNALING_PATHWAY	KEGG_HEDGEHOG_SIGNALING_PATHWAY		20	0.475001	1.29087	0.157258	0.334405	1	1965	tags=30%, list=17%, signal=36%
REACTOME_PURINE_METABOLISM	REACTOME_PURINE_METABOLISM		26	0.443906	1.29078	0.143389	0.334373	1	4062	tags=58%, list=35%, signal=89%
GO_CHLORIDE_TRANSPORT	GO_CHLORIDE_TRANSPORT		29	0.42121	1.2905	0.144309	0.334756	1	1604	tags=24%, list=14%, signal=28%
GSE2770_IL12_AND_TGFB_VS_IL4_TREATED_ACT_CD4_TCELL_6H_UP	GSE2770_IL12_AND_TGFB_VS_IL4_TREATED_ACT_CD4_TCELL_6H_UP		159	0.313639	1.29023	0.0548446	0.335146	1	2028	tags=26%, list=18%, signal=32%
GO_CHROMOSOME_CONDENSATION	GO_CHROMOSOME_CONDENSATION		20	0.465243	1.29011	0.139706	0.335186	1	2253	tags=55%, list=19%, signal=68%
REACTOME_RNA_POL_III_TRANSCRIPTION_INITIATION_FROM_TYPE_3_PROMOTER	REACTOME_RNA_POL_III_TRANSCRIPTION_INITIATION_FROM_TYPE_3_PROMOTER		25	0.447021	1.29007	0.149057	0.335022	1	2869	tags=48%, list=25%, signal=64%
MORF_PDCD1	MORF_PDCD1		21	0.46044	1.28988	0.149635	0.335219	1	238	tags=14%, list=2%, signal=15%
MEISSNER_NPC_HCP_WITH_H3K4ME3_AND_H3K27ME3	MEISSNER_NPC_HCP_WITH_H3K4ME3_AND_H3K27ME3		59	0.367802	1.28986	0.100746	0.334999	1	179	tags=8%, list=2%, signal=9%
ONDER_CDH1_TARGETS_3_UP	ONDER_CDH1_TARGETS_3_UP		15	0.499735	1.28984	0.16441	0.33479	1	990	tags=33%, list=9%, signal=36%
GSE2405_HEAT_KILLED_LYSATE_VS_LIVE_A_PHAGOCYTOPHILUM_STIM_NEUTROPHIL_24H_DN	GSE2405_HEAT_KILLED_LYSATE_VS_LIVE_A_PHAGOCYTOPHILUM_STIM_NEUTROPHIL_24H_DN		135	0.320605	1.28978	0.0689046	0.334697	1	1909	tags=20%, list=16%, signal=24%
REACTOME_SLC_MEDIATED_TRANSMEMBRANE_TRANSPORT	REACTOME_SLC_MEDIATED_TRANSMEMBRANE_TRANSPORT		123	0.323087	1.28954	0.0611111	0.334962	1	1978	tags=23%, list=17%, signal=27%
GSE12505_WT_VS_E2_2_HET_PDC_DN	GSE12505_WT_VS_E2_2_HET_PDC_DN		109	0.335152	1.28944	0.0703422	0.334946	1	2221	tags=26%, list=19%, signal=31%
TCTAGAG_MIR517	TCTAGAG_MIR517		32	0.421601	1.28942	0.119231	0.334752	1	1335	tags=28%, list=12%, signal=32%
ATGTTAA_MIR302C	ATGTTAA_MIR302C		163	0.312226	1.28929	0.0526316	0.334793	1	2715	tags=31%, list=23%, signal=40%
GSE17186_CD21LOW_VS_CD21HIGH_TRANSITIONAL_BCELL_DN	GSE17186_CD21LOW_VS_CD21HIGH_TRANSITIONAL_BCELL_DN		156	0.316233	1.28922	0.0475352	0.334691	1	1904	tags=25%, list=16%, signal=30%
GO_REGULATION_OF_VIRAL_RELEASE_FROM_HOST_CELL	GO_REGULATION_OF_VIRAL_RELEASE_FROM_HOST_CELL		26	0.436856	1.289	0.162409	0.334916	1	2655	tags=42%, list=23%, signal=55%
AIYAR_COBRA1_TARGETS_DN	AIYAR_COBRA1_TARGETS_DN		21	0.458724	1.28879	0.148362	0.335175	1	1532	tags=33%, list=13%, signal=38%
KYNG_NORMAL_AGING_DN	KYNG_NORMAL_AGING_DN		23	0.44741	1.28856	0.139963	0.335436	1	973	tags=26%, list=8%, signal=28%
GSE1460_DP_THYMOCYTE_VS_THYMIC_STROMAL_CELL_UP	GSE1460_DP_THYMOCYTE_VS_THYMIC_STROMAL_CELL_UP		130	0.32122	1.28853	0.0520446	0.335265	1	2860	tags=31%, list=25%, signal=40%
GSE17721_PAM3CSK4_VS_CPG_24H_BMDC_UP	GSE17721_PAM3CSK4_VS_CPG_24H_BMDC_UP		134	0.319109	1.28766	0.0631579	0.337039	1	1273	tags=17%, list=11%, signal=19%
GSE7596_AKT_TRANSD_VS_CTRL_CD4_TCONV_WITH_TGFB_DN	GSE7596_AKT_TRANSD_VS_CTRL_CD4_TCONV_WITH_TGFB_DN		51	0.374386	1.28743	0.127072	0.337348	1	1429	tags=20%, list=12%, signal=22%
MORF_HDAC2	MORF_HDAC2		265	0.295011	1.28723	0.0280374	0.337524	1	2360	tags=27%, list=20%, signal=33%
GO_PYRIMIDINE_RIBONUCLEOSIDE_METABOLIC_PROCESS	GO_PYRIMIDINE_RIBONUCLEOSIDE_METABOLIC_PROCESS		23	0.455108	1.28704	0.16171	0.337732	1	1490	tags=35%, list=13%, signal=40%
REACTOME_REGULATION_OF_MITOTIC_CELL_CYCLE	REACTOME_REGULATION_OF_MITOTIC_CELL_CYCLE		72	0.35043	1.28666	0.0883978	0.338363	1	2545	tags=36%, list=22%, signal=46%
SIRNA_EIF4GI_DN	SIRNA_EIF4GI_DN		70	0.355159	1.28658	0.101449	0.338284	1	1916	tags=29%, list=17%, signal=34%
GSE2585_CD80_HIGH_VS_LOW_AIRE_KO_MTEC_DN	GSE2585_CD80_HIGH_VS_LOW_AIRE_KO_MTEC_DN		88	0.3471	1.2855	0.0716846	0.340504	1	2387	tags=28%, list=21%, signal=36%
GSE10239_MEMORY_VS_DAY4.5_EFF_CD8_TCELL_DN	GSE10239_MEMORY_VS_DAY4.5_EFF_CD8_TCELL_DN		178	0.308254	1.2854	0.0429907	0.3405	1	2302	tags=28%, list=20%, signal=35%
GSE43260_BTLA_POS_VS_NEG_INTRATUMORAL_CD8_TCELL_DN	GSE43260_BTLA_POS_VS_NEG_INTRATUMORAL_CD8_TCELL_DN		171	0.312715	1.28538	0.0594406	0.340301	1	1811	tags=22%, list=16%, signal=25%
GSE41867_NAIVE_VS_DAY15_LCMV_ARMSTRONG_EFFECTOR_CD8_TCELL_UP	GSE41867_NAIVE_VS_DAY15_LCMV_ARMSTRONG_EFFECTOR_CD8_TCELL_UP		177	0.309642	1.285	0.0402098	0.340923	1	2454	tags=29%, list=21%, signal=36%
GO_POSITIVE_REGULATION_OF_TELOMERASE_ACTIVITY	GO_POSITIVE_REGULATION_OF_TELOMERASE_ACTIVITY		23	0.454004	1.28491	0.175299	0.34089	1	1785	tags=52%, list=15%, signal=62%
TCCCRNNRTGC_UNKNOWN	TCCCRNNRTGC_UNKNOWN		169	0.30934	1.28458	0.0368421	0.34139	1	2396	tags=30%, list=21%, signal=37%
GSE32986_UNSTIM_VS_GMCSF_AND_CURDLAN_HIGHDOSE_STIM_DC_UP	GSE32986_UNSTIM_VS_GMCSF_AND_CURDLAN_HIGHDOSE_STIM_DC_UP		176	0.310818	1.28434	0.0408526	0.341718	1	2913	tags=32%, list=25%, signal=43%
CHR15Q24	CHR15Q24		36	0.401489	1.28429	0.11883	0.341578	1	2462	tags=31%, list=21%, signal=39%
EPPERT_PROGENITOR	EPPERT_PROGENITOR		108	0.33098	1.28391	0.0831858	0.342221	1	3520	tags=46%, list=30%, signal=66%
GSE14415_ACT_VS_CTRL_NATURAL_TREG_UP	GSE14415_ACT_VS_CTRL_NATURAL_TREG_UP		141	0.319598	1.28377	0.0659341	0.342319	1	2763	tags=33%, list=24%, signal=43%
GO_ODONTOGENESIS	GO_ODONTOGENESIS		46	0.387469	1.28329	0.0968343	0.343184	1	190	tags=11%, list=2%, signal=11%
REACTOME_DESTABILIZATION_OF_MRNA_BY_KSRP	REACTOME_DESTABILIZATION_OF_MRNA_BY_KSRP		17	0.474151	1.28276	0.147601	0.344179	1	2894	tags=47%, list=25%, signal=63%
GO_REGULATION_OF_TELOMERASE_RNA_LOCALIZATION_TO_CAJAL_BODY	GO_REGULATION_OF_TELOMERASE_RNA_LOCALIZATION_TO_CAJAL_BODY		15	0.503157	1.28273	0.159309	0.343991	1	2487	tags=53%, list=21%, signal=68%
GSE17721_0.5H_VS_12H_POLYIC_BMDC_UP	GSE17721_0.5H_VS_12H_POLYIC_BMDC_UP		149	0.317045	1.28273	0.0419708	0.343738	1	2283	tags=27%, list=20%, signal=33%
GSE22886_UNSTIM_VS_STIM_MEMORY_TCELL_DN	GSE22886_UNSTIM_VS_STIM_MEMORY_TCELL_DN		181	0.306698	1.28265	0.043088	0.343659	1	2904	tags=34%, list=25%, signal=44%
REACTOME_RESOLUTION_OF_AP_SITES_VIA_THE_MULTIPLE_NUCLEOTIDE_PATCH_REPLACEMENT_PATHWAY	REACTOME_RESOLUTION_OF_AP_SITES_VIA_THE_MULTIPLE_NUCLEOTIDE_PATCH_REPLACEMENT_PATHWAY		16	0.487656	1.28216	0.15587	0.344562	1	1926	tags=31%, list=17%, signal=37%
GSE10273_LOW_IL7_VS_HIGH_IL7_AND_IRF4_IN_IRF4_8_NULL_PRE_BCELL_DN	GSE10273_LOW_IL7_VS_HIGH_IL7_AND_IRF4_IN_IRF4_8_NULL_PRE_BCELL_DN		147	0.315777	1.28212	0.060241	0.344399	1	1564	tags=20%, list=14%, signal=23%
GCNP_SHH_UP_EARLY.V1_UP	GCNP_SHH_UP_EARLY.V1_UP		130	0.319417	1.28211	0.0483005	0.344158	1	1493	tags=22%, list=13%, signal=25%
GO_CILIARY_TIP	GO_CILIARY_TIP		34	0.416297	1.28209	0.12963	0.343975	1	2414	tags=41%, list=21%, signal=52%
GSE17974_1H_VS_72H_UNTREATED_IN_VITRO_CD4_TCELL_DN	GSE17974_1H_VS_72H_UNTREATED_IN_VITRO_CD4_TCELL_DN		182	0.307376	1.28192	0.0491525	0.344089	1	2311	tags=27%, list=20%, signal=33%
RICKMAN_TUMOR_DIFFERENTIATED_WELL_VS_MODERATELY_UP	RICKMAN_TUMOR_DIFFERENTIATED_WELL_VS_MODERATELY_UP		76	0.352267	1.28191	0.0938086	0.343858	1	2036	tags=30%, list=18%, signal=36%
GO_PIGMENT_GRANULE_LOCALIZATION	GO_PIGMENT_GRANULE_LOCALIZATION		15	0.498657	1.28186	0.170686	0.343733	1	2199	tags=40%, list=19%, signal=49%
GO_SOLUTE_CATION_ANTIPORTER_ACTIVITY	GO_SOLUTE_CATION_ANTIPORTER_ACTIVITY		17	0.481327	1.28172	0.166031	0.343823	1	1923	tags=47%, list=17%, signal=56%
GSE27786_BCELL_VS_MONO_MAC_DN	GSE27786_BCELL_VS_MONO_MAC_DN		119	0.324054	1.28162	0.0630473	0.343798	1	1775	tags=22%, list=15%, signal=26%
E2F1_UP.V1_UP	E2F1_UP.V1_UP		150	0.312391	1.2814	0.0546737	0.344094	1	1846	tags=26%, list=16%, signal=31%
GARGALOVIC_RESPONSE_TO_OXIDIZED_PHOSPHOLIPIDS_RED_DN	GARGALOVIC_RESPONSE_TO_OXIDIZED_PHOSPHOLIPIDS_RED_DN		16	0.487154	1.2813	0.172727	0.344075	1	0	tags=6%, list=0%, signal=6%
GSE22589_HEALTHY_VS_HIV_AND_SIV_INFECTED_DC_UP	GSE22589_HEALTHY_VS_HIV_AND_SIV_INFECTED_DC_UP		171	0.31111	1.28118	0.0674956	0.344099	1	2623	tags=29%, list=23%, signal=37%
GO_NEGATIVE_REGULATION_OF_CYTOSKELETON_ORGANIZATION	GO_NEGATIVE_REGULATION_OF_CYTOSKELETON_ORGANIZATION		158	0.31029	1.28064	0.0575916	0.345128	1	3221	tags=42%, list=28%, signal=58%
REACTOME_GLUCOSE_TRANSPORT	REACTOME_GLUCOSE_TRANSPORT		29	0.424713	1.28062	0.13271	0.344919	1	3029	tags=38%, list=26%, signal=51%
GAUSSMANN_MLL_AF4_FUSION_TARGETS_G_DN	GAUSSMANN_MLL_AF4_FUSION_TARGETS_G_DN		23	0.450054	1.28052	0.168856	0.344893	1	1312	tags=26%, list=11%, signal=29%
GSE15324_NAIVE_VS_ACTIVATED_ELF4_KO_CD8_TCELL_DN	GSE15324_NAIVE_VS_ACTIVATED_ELF4_KO_CD8_TCELL_DN		150	0.313183	1.28042	0.0635209	0.344863	1	2673	tags=30%, list=23%, signal=38%
PYEON_HPV_POSITIVE_TUMORS_UP	PYEON_HPV_POSITIVE_TUMORS_UP		72	0.35295	1.28001	0.0828729	0.345617	1	2449	tags=33%, list=21%, signal=42%
GSE21063_CTRL_VS_ANTI_IGM_STIM_BCELL_16H_UP	GSE21063_CTRL_VS_ANTI_IGM_STIM_BCELL_16H_UP		139	0.317889	1.27984	0.0630631	0.345784	1	2180	tags=29%, list=19%, signal=36%
GO_U4_U6_X_U5_TRI_SNRNP_COMPLEX	GO_U4_U6_X_U5_TRI_SNRNP_COMPLEX		18	0.472003	1.27933	0.168142	0.346696	1	2344	tags=44%, list=20%, signal=56%
GSE40666_WT_VS_STAT1_KO_CD8_TCELL_WITH_IFNA_STIM_90MIN_DN	GSE40666_WT_VS_STAT1_KO_CD8_TCELL_WITH_IFNA_STIM_90MIN_DN		161	0.311583	1.27927	0.0437828	0.346601	1	1827	tags=27%, list=16%, signal=31%
CEBPGAMMA_Q6	CEBPGAMMA_Q6		156	0.314396	1.27917	0.0511464	0.346584	1	2676	tags=31%, list=23%, signal=40%
REACTOME_HIV_INFECTION	REACTOME_HIV_INFECTION		179	0.30884	1.27907	0.0498282	0.346548	1	2685	tags=30%, list=23%, signal=38%
HOLLEMAN_PREDNISOLONE_RESISTANCE_B_ALL_UP	HOLLEMAN_PREDNISOLONE_RESISTANCE_B_ALL_UP		22	0.458955	1.27902	0.16171	0.346434	1	1667	tags=32%, list=14%, signal=37%
HAHTOLA_SEZARY_SYNDROM_UP	HAHTOLA_SEZARY_SYNDROM_UP		73	0.353042	1.27895	0.0972973	0.34634	1	2279	tags=37%, list=20%, signal=46%
REACTOME_FANCONI_ANEMIA_PATHWAY	REACTOME_FANCONI_ANEMIA_PATHWAY		16	0.483812	1.27847	0.179159	0.347205	1	1689	tags=31%, list=15%, signal=37%
GSE21678_WT_VS_FOXO1_FOXO3_KO_TREG_DN	GSE21678_WT_VS_FOXO1_FOXO3_KO_TREG_DN		140	0.316209	1.27845	0.0628366	0.346997	1	2873	tags=32%, list=25%, signal=42%
GO_ODONTOGENESIS_OF_DENTIN_CONTAINING_TOOTH	GO_ODONTOGENESIS_OF_DENTIN_CONTAINING_TOOTH		34	0.41053	1.27812	0.12	0.347494	1	190	tags=12%, list=2%, signal=12%
RRAGTTGT_UNKNOWN	RRAGTTGT_UNKNOWN		163	0.309262	1.27797	0.0656028	0.347619	1	2395	tags=28%, list=21%, signal=35%
MORF_PPP1CA	MORF_PPP1CA		165	0.309573	1.27765	0.0428816	0.348101	1	2595	tags=32%, list=22%, signal=40%
GO_MISFOLDED_OR_INCOMPLETELY_SYNTHESIZED_PROTEIN_CATABOLIC_PROCESS	GO_MISFOLDED_OR_INCOMPLETELY_SYNTHESIZED_PROTEIN_CATABOLIC_PROCESS		16	0.490927	1.27759	0.177694	0.347998	1	1406	tags=25%, list=12%, signal=28%
GSE25088_WT_VS_STAT6_KO_MACROPHAGE_ROSIGLITAZONE_AND_IL4_STIM_UP	GSE25088_WT_VS_STAT6_KO_MACROPHAGE_ROSIGLITAZONE_AND_IL4_STIM_UP		150	0.31309	1.27746	0.0489511	0.348078	1	2271	tags=29%, list=20%, signal=35%
GO_PROTEIN_LOCALIZATION_TO_LYSOSOME	GO_PROTEIN_LOCALIZATION_TO_LYSOSOME		17	0.481283	1.2774	0.149533	0.347971	1	2694	tags=29%, list=23%, signal=38%
CYCLIN_D1_UP.V1_UP	CYCLIN_D1_UP.V1_UP		113	0.32852	1.27737	0.0601093	0.347787	1	1907	tags=23%, list=16%, signal=27%
GSE7852_THYMUS_VS_FAT_TCONV_UP	GSE7852_THYMUS_VS_FAT_TCONV_UP		158	0.315728	1.27721	0.0517857	0.347895	1	1572	tags=20%, list=14%, signal=23%
KUROKAWA_LIVER_CANCER_CHEMOTHERAPY_DN	KUROKAWA_LIVER_CANCER_CHEMOTHERAPY_DN		29	0.417825	1.2772	0.124521	0.347664	1	1445	tags=34%, list=12%, signal=39%
MODULE_337	MODULE_337		53	0.377207	1.27701	0.125714	0.347861	1	2864	tags=43%, list=25%, signal=57%
GO_PROTEIN_K63_LINKED_DEUBIQUITINATION	GO_PROTEIN_K63_LINKED_DEUBIQUITINATION		18	0.477061	1.27695	0.186792	0.347765	1	1874	tags=33%, list=16%, signal=40%
GSE29618_LAIV_VS_TIV_FLU_VACCINE_DAY7_BCELL_DN	GSE29618_LAIV_VS_TIV_FLU_VACCINE_DAY7_BCELL_DN		179	0.304511	1.2768	0.0529101	0.347856	1	1944	tags=23%, list=17%, signal=27%
BIOCARTA_P53HYPOXIA_PATHWAY	BIOCARTA_P53HYPOXIA_PATHWAY		22	0.456326	1.27677	0.174419	0.347675	1	2496	tags=41%, list=22%, signal=52%
GCM_MYST2	GCM_MYST2		149	0.311248	1.27674	0.0616197	0.347506	1	3075	tags=34%, list=27%, signal=45%
GO_TRANSCRIPTION_FROM_RNA_POLYMERASE_III_PROMOTER	GO_TRANSCRIPTION_FROM_RNA_POLYMERASE_III_PROMOTER		36	0.406316	1.27628	0.155235	0.348334	1	2685	tags=42%, list=23%, signal=54%
GSE37301_LYMPHOID_PRIMED_MPP_VS_GRAN_MONO_PROGENITOR_DN	GSE37301_LYMPHOID_PRIMED_MPP_VS_GRAN_MONO_PROGENITOR_DN		171	0.311073	1.27585	0.0481283	0.349082	1	2933	tags=35%, list=25%, signal=46%
GO_REGULATION_OF_RHODOPSIN_MEDIATED_SIGNALING_PATHWAY	GO_REGULATION_OF_RHODOPSIN_MEDIATED_SIGNALING_PATHWAY		15	0.498165	1.2756	0.164773	0.349426	1	2845	tags=40%, list=25%, signal=53%
GSE360_L_DONOVANI_VS_L_MAJOR_MAC_UP	GSE360_L_DONOVANI_VS_L_MAJOR_MAC_UP		141	0.318979	1.27542	0.0633803	0.349635	1	3040	tags=38%, list=26%, signal=51%
GO_ANION_TRANSMEMBRANE_TRANSPORT	GO_ANION_TRANSMEMBRANE_TRANSPORT		100	0.334678	1.27534	0.0862385	0.349571	1	1219	tags=17%, list=11%, signal=19%
GSE3982_DC_VS_TH1_DN	GSE3982_DC_VS_TH1_DN		163	0.310913	1.27531	0.0488656	0.349408	1	1281	tags=20%, list=11%, signal=22%
GO_HETEROPHILIC_CELL_CELL_ADHESION_VIA_PLASMA_MEMBRANE_CELL_ADHESION_MOLECULES	GO_HETEROPHILIC_CELL_CELL_ADHESION_VIA_PLASMA_MEMBRANE_CELL_ADHESION_MOLECULES		15	0.492538	1.27529	0.178771	0.349207	1	2387	tags=33%, list=21%, signal=42%
GSE557_WT_VS_I_AB_KO_DC_DN	GSE557_WT_VS_I_AB_KO_DC_DN		158	0.309471	1.27507	0.0574913	0.349461	1	1577	tags=23%, list=14%, signal=26%
MODULE_8	MODULE_8		352	0.285499	1.27489	0.0222603	0.349659	1	2614	tags=33%, list=23%, signal=41%
GO_REGULATION_OF_DNA_TEMPLATED_TRANSCRIPTION_ELONGATION	GO_REGULATION_OF_DNA_TEMPLATED_TRANSCRIPTION_ELONGATION		31	0.41429	1.27488	0.143126	0.349447	1	3407	tags=52%, list=29%, signal=73%
MORF_FSHR	MORF_FSHR		106	0.328852	1.27463	0.0814558	0.349778	1	2113	tags=24%, list=18%, signal=29%
GO_POSITIVE_REGULATION_OF_DNA_TEMPLATED_TRANSCRIPTION_ELONGATION	GO_POSITIVE_REGULATION_OF_DNA_TEMPLATED_TRANSCRIPTION_ELONGATION		21	0.454359	1.27454	0.165103	0.34976	1	3407	tags=57%, list=29%, signal=81%
GO_VESICLE_TARGETING	GO_VESICLE_TARGETING		66	0.357746	1.27431	0.107011	0.35006	1	1628	tags=18%, list=14%, signal=21%
GSE17721_PAM3CSK4_VS_GADIQUIMOD_6H_BMDC_UP	GSE17721_PAM3CSK4_VS_GADIQUIMOD_6H_BMDC_UP		170	0.305021	1.27396	0.0452899	0.350655	1	589	tags=11%, list=5%, signal=12%
DANG_REGULATED_BY_MYC_UP	DANG_REGULATED_BY_MYC_UP		62	0.361075	1.27371	0.105735	0.351014	1	1964	tags=31%, list=17%, signal=37%
GSE41867_DAY8_EFFECTOR_VS_DAY30_MEMORY_CD8_TCELL_LCMV_ARMSTRONG_DN	GSE41867_DAY8_EFFECTOR_VS_DAY30_MEMORY_CD8_TCELL_LCMV_ARMSTRONG_DN		167	0.312286	1.27363	0.0534483	0.350931	1	2467	tags=31%, list=21%, signal=38%
LEE_LIVER_CANCER_MYC_UP	LEE_LIVER_CANCER_MYC_UP		37	0.401122	1.27349	0.149362	0.351048	1	1756	tags=32%, list=15%, signal=38%
GSE34156_UNTREATED_VS_24H_TLR1_TLR2_LIGAND_TREATED_MONOCYTE_DN	GSE34156_UNTREATED_VS_24H_TLR1_TLR2_LIGAND_TREATED_MONOCYTE_DN		137	0.317401	1.27343	0.052356	0.350924	1	2938	tags=36%, list=25%, signal=48%
GSE17721_LPS_VS_CPG_16H_BMDC_DN	GSE17721_LPS_VS_CPG_16H_BMDC_DN		131	0.326463	1.27277	0.0789474	0.352298	1	1588	tags=19%, list=14%, signal=22%
GCM_UBE2N	GCM_UBE2N		134	0.318688	1.27237	0.068662	0.353016	1	2711	tags=30%, list=23%, signal=39%
GSE19941_IL10_KO_VS_IL10_KO_AND_NFKBP50_KO_LPS_STIM_MACROPHAGE_DN	GSE19941_IL10_KO_VS_IL10_KO_AND_NFKBP50_KO_LPS_STIM_MACROPHAGE_DN		163	0.310323	1.27184	0.0564103	0.354011	1	1885	tags=23%, list=16%, signal=27%
GSE7852_LN_VS_THYMUS_TREG_DN	GSE7852_LN_VS_THYMUS_TREG_DN		148	0.310297	1.27176	0.0475352	0.353947	1	1442	tags=22%, list=12%, signal=24%
GO_NUCLEOBASE_CONTAINING_COMPOUND_TRANSPORT	GO_NUCLEOBASE_CONTAINING_COMPOUND_TRANSPORT		165	0.310999	1.27117	0.0682226	0.355085	1	3465	tags=38%, list=30%, signal=53%
GO_CYTOKINESIS	GO_CYTOKINESIS		67	0.35283	1.27109	0.115315	0.355052	1	2225	tags=31%, list=19%, signal=39%
E2F1_Q4	E2F1_Q4		186	0.310394	1.27088	0.0468468	0.355309	1	1217	tags=18%, list=11%, signal=20%
MODULE_485	MODULE_485		34	0.40421	1.27086	0.146435	0.355117	1	2347	tags=44%, list=20%, signal=55%
GSE29618_PRE_VS_DAY7_FLU_VACCINE_PDC_UP	GSE29618_PRE_VS_DAY7_FLU_VACCINE_PDC_UP		79	0.354427	1.27076	0.0961183	0.355104	1	2113	tags=30%, list=18%, signal=37%
REACTOME_MRNA_3_END_PROCESSING	REACTOME_MRNA_3_END_PROCESSING		31	0.422754	1.27064	0.142857	0.355127	1	2053	tags=32%, list=18%, signal=39%
GO_REGULATION_OF_CHROMOSOME_ORGANIZATION	GO_REGULATION_OF_CHROMOSOME_ORGANIZATION		222	0.29721	1.27061	0.0420315	0.354947	1	2546	tags=32%, list=22%, signal=41%
GSE21670_STAT3_KO_VS_WT_CD4_TCELL_TGFB_TREATED_DN	GSE21670_STAT3_KO_VS_WT_CD4_TCELL_TGFB_TREATED_DN		103	0.329411	1.27035	0.08	0.355315	1	2299	tags=30%, list=20%, signal=37%
GSE8921_UNSTIM_0H_VS_TLR1_2_STIM_MONOCYTE_24H_UP	GSE8921_UNSTIM_0H_VS_TLR1_2_STIM_MONOCYTE_24H_UP		78	0.342798	1.27029	0.0931099	0.35522	1	2833	tags=37%, list=24%, signal=49%
REACTOME_PEROXISOMAL_LIPID_METABOLISM	REACTOME_PEROXISOMAL_LIPID_METABOLISM		18	0.471122	1.27026	0.160896	0.355034	1	546	tags=17%, list=5%, signal=17%
YAO_TEMPORAL_RESPONSE_TO_PROGESTERONE_CLUSTER_15	YAO_TEMPORAL_RESPONSE_TO_PROGESTERONE_CLUSTER_15		23	0.439977	1.27005	0.173996	0.355297	1	1818	tags=43%, list=16%, signal=51%
GSE17721_CTRL_VS_CPG_0.5H_BMDC_UP	GSE17721_CTRL_VS_CPG_0.5H_BMDC_UP		165	0.3088	1.26977	0.0501859	0.355706	1	2454	tags=28%, list=21%, signal=35%
GO_CELLULAR_SENESCENCE	GO_CELLULAR_SENESCENCE		24	0.433288	1.26975	0.176367	0.355504	1	3047	tags=42%, list=26%, signal=56%
GRADE_COLON_AND_RECTAL_CANCER_UP	GRADE_COLON_AND_RECTAL_CANCER_UP		257	0.295314	1.26963	0.0363322	0.355517	1	2457	tags=27%, list=21%, signal=34%
GSE20198_IL12_IL18_VS_IFNA_TREATED_ACT_CD4_TCELL_DN	GSE20198_IL12_IL18_VS_IFNA_TREATED_ACT_CD4_TCELL_DN		161	0.311283	1.26949	0.0546737	0.355631	1	3023	tags=39%, list=26%, signal=51%
GSE17301_CTRL_VS_48H_ACD3_ACD28_IFNA5_STIM_CD8_TCELL_DN	GSE17301_CTRL_VS_48H_ACD3_ACD28_IFNA5_STIM_CD8_TCELL_DN		160	0.309995	1.26936	0.0530973	0.355673	1	2552	tags=30%, list=22%, signal=38%
DEURIG_T_CELL_PROLYMPHOCYTIC_LEUKEMIA_UP	DEURIG_T_CELL_PROLYMPHOCYTIC_LEUKEMIA_UP		246	0.295422	1.26896	0.033275	0.356399	1	1698	tags=20%, list=15%, signal=23%
CHR3P24	CHR3P24		22	0.448853	1.26892	0.1569	0.356241	1	3416	tags=55%, list=30%, signal=77%
PID_ATM_PATHWAY	PID_ATM_PATHWAY		34	0.407497	1.26876	0.14313	0.356373	1	1176	tags=26%, list=10%, signal=29%
GSE3982_EFF_MEMORY_CD4_TCELL_VS_TH1_DN	GSE3982_EFF_MEMORY_CD4_TCELL_VS_TH1_DN		175	0.308491	1.26821	0.0447504	0.35743	1	1052	tags=18%, list=9%, signal=20%
GSE33424_CD161_HIGH_VS_INT_CD8_TCELL_DN	GSE33424_CD161_HIGH_VS_INT_CD8_TCELL_DN		153	0.312139	1.26786	0.0646853	0.358031	1	2035	tags=29%, list=18%, signal=34%
GSE5542_IFNA_VS_IFNA_AND_IFNG_TREATED_EPITHELIAL_CELLS_24H_DN	GSE5542_IFNA_VS_IFNA_AND_IFNG_TREATED_EPITHELIAL_CELLS_24H_DN		133	0.315423	1.26726	0.0734767	0.359247	1	1756	tags=23%, list=15%, signal=26%
GSE9601_UNTREATED_VS_PI3K_INHIBITOR_TREATED_HCMV_INF_MONOCYTE_DN	GSE9601_UNTREATED_VS_PI3K_INHIBITOR_TREATED_HCMV_INF_MONOCYTE_DN		106	0.327857	1.26725	0.08	0.359038	1	2267	tags=27%, list=20%, signal=34%
GSE21063_WT_VS_NFATC1_KO_8H_ANTI_IGM_STIM_BCELL_DN	GSE21063_WT_VS_NFATC1_KO_8H_ANTI_IGM_STIM_BCELL_DN		156	0.309228	1.26714	0.0495413	0.359046	1	2564	tags=29%, list=22%, signal=37%
GSE40274_SATB1_VS_FOXP3_AND_SATB1_TRANSDUCED_ACTIVATED_CD4_TCELL_DN	GSE40274_SATB1_VS_FOXP3_AND_SATB1_TRANSDUCED_ACTIVATED_CD4_TCELL_DN		63	0.359213	1.2671	0.10397	0.35889	1	1890	tags=22%, list=16%, signal=26%
GSE1460_DP_THYMOCYTE_VS_THYMIC_STROMAL_CELL_DN	GSE1460_DP_THYMOCYTE_VS_THYMIC_STROMAL_CELL_DN		145	0.314809	1.26674	0.0631579	0.359533	1	2035	tags=28%, list=18%, signal=34%
GSE34006_UNTREATED_VS_A2AR_AGONIST_TREATED_TREG_UP	GSE34006_UNTREATED_VS_A2AR_AGONIST_TREATED_TREG_UP		174	0.301297	1.26647	0.062724	0.359926	1	1848	tags=21%, list=16%, signal=24%
GSE14308_TH17_VS_NAIVE_CD4_TCELL_UP	GSE14308_TH17_VS_NAIVE_CD4_TCELL_UP		162	0.307978	1.26636	0.0526316	0.359936	1	2223	tags=28%, list=19%, signal=34%
GSE15624_CTRL_VS_6H_HALOFUGINONE_TREATED_CD4_TCELL_DN	GSE15624_CTRL_VS_6H_HALOFUGINONE_TREATED_CD4_TCELL_DN		138	0.320364	1.26623	0.0716783	0.359981	1	1868	tags=23%, list=16%, signal=27%
MORF_RAB5A	MORF_RAB5A		95	0.334649	1.26585	0.0848056	0.360612	1	2279	tags=28%, list=20%, signal=35%
GO_ENDORIBONUCLEASE_COMPLEX	GO_ENDORIBONUCLEASE_COMPLEX		16	0.48974	1.26566	0.163603	0.36081	1	1629	tags=44%, list=14%, signal=51%
GSE31082_DN_VS_CD8_SP_THYMOCYTE_UP	GSE31082_DN_VS_CD8_SP_THYMOCYTE_UP		160	0.308513	1.26542	0.0622776	0.361144	1	2419	tags=30%, list=21%, signal=37%
GSE14000_TRANSLATED_RNA_VS_MRNA_4H_LPS_DC_UP	GSE14000_TRANSLATED_RNA_VS_MRNA_4H_LPS_DC_UP		171	0.307241	1.26533	0.0516934	0.361085	1	3151	tags=32%, list=27%, signal=43%
MORF_AP2M1	MORF_AP2M1		208	0.296782	1.26464	0.0472175	0.362459	1	1608	tags=20%, list=14%, signal=22%
GO_RAN_GTPASE_BINDING	GO_RAN_GTPASE_BINDING		28	0.436426	1.26436	0.148571	0.362857	1	2884	tags=39%, list=25%, signal=52%
GO_PHOTORECEPTOR_OUTER_SEGMENT	GO_PHOTORECEPTOR_OUTER_SEGMENT		26	0.428816	1.2643	0.173745	0.36274	1	2903	tags=42%, list=25%, signal=56%
GAZDA_DIAMOND_BLACKFAN_ANEMIA_PROGENITOR_DN	GAZDA_DIAMOND_BLACKFAN_ANEMIA_PROGENITOR_DN		53	0.376019	1.26366	0.112701	0.364091	1	1357	tags=23%, list=12%, signal=26%
GKCGCNNNNNNNTGAYG_UNKNOWN	GKCGCNNNNNNNTGAYG_UNKNOWN		50	0.371893	1.26332	0.116152	0.364669	1	3040	tags=42%, list=26%, signal=57%
GSE37301_COMMON_LYMPHOID_PROGENITOR_VS_PRO_BCELL_DN	GSE37301_COMMON_LYMPHOID_PROGENITOR_VS_PRO_BCELL_DN		171	0.304822	1.26317	0.0587219	0.364811	1	2704	tags=30%, list=23%, signal=39%
MODULE_427	MODULE_427		82	0.336573	1.26312	0.100186	0.364702	1	1257	tags=20%, list=11%, signal=22%
GO_NUCLEAR_PERIPHERY	GO_NUCLEAR_PERIPHERY		97	0.332986	1.26306	0.0871143	0.364595	1	3117	tags=45%, list=27%, signal=62%
GSE1460_DP_THYMOCYTE_VS_NAIVE_CD4_TCELL_ADULT_BLOOD_UP	GSE1460_DP_THYMOCYTE_VS_NAIVE_CD4_TCELL_ADULT_BLOOD_UP		175	0.300492	1.26286	0.0472855	0.364862	1	1860	tags=27%, list=16%, signal=32%
GO_SIGNAL_SEQUENCE_BINDING	GO_SIGNAL_SEQUENCE_BINDING		32	0.407275	1.26253	0.137432	0.365435	1	3310	tags=50%, list=29%, signal=70%
MORF_RAN	MORF_RAN		259	0.2932	1.26251	0.0388693	0.365235	1	2487	tags=27%, list=21%, signal=34%
GO_SNRNA_METABOLIC_PROCESS	GO_SNRNA_METABOLIC_PROCESS		74	0.349402	1.26247	0.107639	0.365082	1	2914	tags=35%, list=25%, signal=47%
SERVITJA_LIVER_HNF1A_TARGETS_UP	SERVITJA_LIVER_HNF1A_TARGETS_UP		87	0.33912	1.2624	0.0879713	0.364979	1	2209	tags=33%, list=19%, signal=41%
GSE15767_MED_VS_SCS_MAC_LN_DN	GSE15767_MED_VS_SCS_MAC_LN_DN		152	0.309663	1.26205	0.0604982	0.365632	1	2169	tags=23%, list=19%, signal=28%
GO_NUCLEAR_BODY	GO_NUCLEAR_BODY		287	0.286428	1.26204	0.044405	0.365395	1	2920	tags=33%, list=25%, signal=44%
GCM_PSME1	GCM_PSME1		83	0.339532	1.26199	0.107774	0.365289	1	1718	tags=20%, list=15%, signal=24%
BORCZUK_MALIGNANT_MESOTHELIOMA_UP	BORCZUK_MALIGNANT_MESOTHELIOMA_UP		272	0.288438	1.26193	0.0376068	0.365195	1	2487	tags=26%, list=21%, signal=32%
GO_DEOXYRIBONUCLEOTIDE_METABOLIC_PROCESS	GO_DEOXYRIBONUCLEOTIDE_METABOLIC_PROCESS		29	0.427299	1.2615	0.160079	0.366029	1	1448	tags=24%, list=13%, signal=28%
MODULE_332	MODULE_332		40	0.387587	1.26148	0.154399	0.365823	1	1359	tags=23%, list=12%, signal=25%
KAECH_NAIVE_VS_DAY8_EFF_CD8_TCELL_DN	KAECH_NAIVE_VS_DAY8_EFF_CD8_TCELL_DN		176	0.303381	1.2612	0.0431655	0.366275	1	1653	tags=23%, list=14%, signal=27%
MORF_PPP6C	MORF_PPP6C		100	0.333982	1.26115	0.106306	0.366155	1	2358	tags=28%, list=20%, signal=35%
REACTOME_E2F_MEDIATED_REGULATION_OF_DNA_REPLICATION	REACTOME_E2F_MEDIATED_REGULATION_OF_DNA_REPLICATION		32	0.402307	1.26088	0.152727	0.366546	1	2997	tags=53%, list=26%, signal=71%
GSE36392_EOSINOPHIL_VS_NEUTROPHIL_IL25_TREATED_LUNG_DN	GSE36392_EOSINOPHIL_VS_NEUTROPHIL_IL25_TREATED_LUNG_DN		168	0.30548	1.26079	0.0438597	0.366534	1	2084	tags=26%, list=18%, signal=31%
GSE45365_NK_CELL_VS_CD11B_DC_MCMV_INFECTION_UP	GSE45365_NK_CELL_VS_CD11B_DC_MCMV_INFECTION_UP		125	0.315768	1.26073	0.0875912	0.366401	1	2330	tags=30%, list=20%, signal=38%
GO_PYRIMIDINE_NUCLEOSIDE_BIOSYNTHETIC_PROCESS	GO_PYRIMIDINE_NUCLEOSIDE_BIOSYNTHETIC_PROCESS		23	0.446025	1.26058	0.168856	0.366524	1	3448	tags=61%, list=30%, signal=87%
MODULE_105	MODULE_105		163	0.30877	1.26051	0.0692042	0.366463	1	1588	tags=22%, list=14%, signal=25%
PID_TAP63_PATHWAY	PID_TAP63_PATHWAY		44	0.379879	1.26032	0.130973	0.366667	1	1191	tags=25%, list=10%, signal=28%
MORF_PHB	MORF_PHB		114	0.323673	1.26029	0.0904255	0.366481	1	3842	tags=49%, list=33%, signal=73%
GO_RNA_METHYLATION	GO_RNA_METHYLATION		44	0.386507	1.26027	0.138354	0.366303	1	2392	tags=30%, list=21%, signal=37%
PITX2_Q2	PITX2_Q2		124	0.316954	1.25996	0.0697248	0.366809	1	1844	tags=22%, list=16%, signal=26%
GO_CELLULAR_COMPONENT_DISASSEMBLY	GO_CELLULAR_COMPONENT_DISASSEMBLY		357	0.280179	1.25993	0.033275	0.36662	1	2763	tags=28%, list=24%, signal=36%
GO_NEGATIVE_REGULATION_OF_CATABOLIC_PROCESS	GO_NEGATIVE_REGULATION_OF_CATABOLIC_PROCESS		145	0.310657	1.25947	0.0706522	0.367478	1	2007	tags=26%, list=17%, signal=30%
GSE24142_EARLY_THYMIC_PROGENITOR_VS_DN2_THYMOCYTE_ADULT_DN	GSE24142_EARLY_THYMIC_PROGENITOR_VS_DN2_THYMOCYTE_ADULT_DN		138	0.312744	1.25942	0.0859107	0.367351	1	2179	tags=32%, list=19%, signal=39%
GO_REGULATION_OF_TELOMERE_MAINTENANCE	GO_REGULATION_OF_TELOMERE_MAINTENANCE		59	0.361729	1.25921	0.131295	0.367634	1	2132	tags=36%, list=18%, signal=43%
GO_THIOLESTER_HYDROLASE_ACTIVITY	GO_THIOLESTER_HYDROLASE_ACTIVITY		23	0.442868	1.25896	0.172481	0.367971	1	1300	tags=26%, list=11%, signal=29%
LIANG_HEMATOPOIESIS_STEM_CELL_NUMBER_LARGE_VS_TINY_DN	LIANG_HEMATOPOIESIS_STEM_CELL_NUMBER_LARGE_VS_TINY_DN		35	0.397258	1.25874	0.150659	0.368289	1	507	tags=14%, list=4%, signal=15%
GO_METHYL_CPG_BINDING	GO_METHYL_CPG_BINDING		15	0.482303	1.25829	0.160075	0.369208	1	1754	tags=20%, list=15%, signal=24%
GSE27786_LIN_NEG_VS_NKCELL_UP	GSE27786_LIN_NEG_VS_NKCELL_UP		136	0.311008	1.258	0.0913793	0.369706	1	1756	tags=22%, list=15%, signal=26%
GO_REGULATION_OF_MRNA_SPLICING_VIA_SPLICEOSOME	GO_REGULATION_OF_MRNA_SPLICING_VIA_SPLICEOSOME		48	0.37143	1.25774	0.150459	0.370078	1	2768	tags=40%, list=24%, signal=52%
BOYLAN_MULTIPLE_MYELOMA_C_D_UP	BOYLAN_MULTIPLE_MYELOMA_C_D_UP		111	0.320249	1.2576	0.0920354	0.370177	1	2235	tags=25%, list=19%, signal=31%
GSE19888_CTRL_VS_T_CELL_MEMBRANES_ACT_MAST_CELL_UP	GSE19888_CTRL_VS_T_CELL_MEMBRANES_ACT_MAST_CELL_UP		172	0.301982	1.25663	0.0606061	0.372356	1	1642	tags=21%, list=14%, signal=24%
GSE3982_NEUTROPHIL_VS_TH2_DN	GSE3982_NEUTROPHIL_VS_TH2_DN		177	0.302656	1.25657	0.0571956	0.372257	1	2495	tags=27%, list=22%, signal=34%
GSE25088_CTRL_VS_ROSIGLITAZONE_STIM_MACROPHAGE_UP	GSE25088_CTRL_VS_ROSIGLITAZONE_STIM_MACROPHAGE_UP		142	0.313145	1.25649	0.0708117	0.372195	1	2083	tags=25%, list=18%, signal=31%
GSE22886_NAIVE_TCELL_VS_NEUTROPHIL_DN	GSE22886_NAIVE_TCELL_VS_NEUTROPHIL_DN		104	0.328467	1.25636	0.0783242	0.372249	1	360	tags=9%, list=3%, signal=9%
CHENG_IMPRINTED_BY_ESTRADIOL	CHENG_IMPRINTED_BY_ESTRADIOL		65	0.354897	1.25603	0.117754	0.372846	1	3205	tags=37%, list=28%, signal=51%
GSE27786_LSK_VS_MONO_MAC_DN	GSE27786_LSK_VS_MONO_MAC_DN		124	0.316887	1.25572	0.0758123	0.373354	1	1677	tags=19%, list=14%, signal=21%
TTGGGAG_MIR150	TTGGGAG_MIR150		73	0.344518	1.2557	0.132509	0.373155	1	3305	tags=48%, list=29%, signal=67%
GSE15330_LYMPHOID_MULTIPOTENT_VS_GRANULOCYTE_MONOCYTE_PROGENITOR_UP	GSE15330_LYMPHOID_MULTIPOTENT_VS_GRANULOCYTE_MONOCYTE_PROGENITOR_UP		141	0.306763	1.25535	0.0715564	0.373799	1	1214	tags=20%, list=10%, signal=22%
GO_COVALENT_CHROMATIN_MODIFICATION	GO_COVALENT_CHROMATIN_MODIFICATION		257	0.291098	1.25503	0.0429043	0.374325	1	3378	tags=38%, list=29%, signal=52%
HAHTOLA_MYCOSIS_FUNGOIDES_CD4_DN	HAHTOLA_MYCOSIS_FUNGOIDES_CD4_DN		110	0.319401	1.25491	0.0867159	0.374386	1	2861	tags=39%, list=25%, signal=51%
GO_VESICLE_COATING	GO_VESICLE_COATING		61	0.355939	1.25488	0.133218	0.374221	1	2159	tags=26%, list=19%, signal=32%
GSE12845_NAIVE_VS_DARKZONE_GC_TONSIL_BCELL_DN	GSE12845_NAIVE_VS_DARKZONE_GC_TONSIL_BCELL_DN		179	0.301284	1.25475	0.053286	0.374319	1	1740	tags=24%, list=15%, signal=28%
GO_O_METHYLTRANSFERASE_ACTIVITY	GO_O_METHYLTRANSFERASE_ACTIVITY		15	0.476374	1.25443	0.198198	0.37484	1	2392	tags=53%, list=21%, signal=67%
GO_DNA_DIRECTED_RNA_POLYMERASE_III_COMPLEX	GO_DNA_DIRECTED_RNA_POLYMERASE_III_COMPLEX		18	0.467203	1.25431	0.18609	0.374904	1	2685	tags=56%, list=23%, signal=72%
GO_PROTEIN_LOCALIZATION_TO_CHROMOSOME	GO_PROTEIN_LOCALIZATION_TO_CHROMOSOME		31	0.410026	1.25416	0.162455	0.375033	1	2853	tags=52%, list=25%, signal=68%
GSE17974_IL4_AND_ANTI_IL12_VS_UNTREATED_12H_ACT_CD4_TCELL_UP	GSE17974_IL4_AND_ANTI_IL12_VS_UNTREATED_12H_ACT_CD4_TCELL_UP		137	0.309942	1.2538	0.0751748	0.375705	1	1571	tags=23%, list=14%, signal=26%
GSE37605_C57BL6_VS_NOD_FOXP3_IRES_GFP_TCONV_DN	GSE37605_C57BL6_VS_NOD_FOXP3_IRES_GFP_TCONV_DN		118	0.320796	1.25342	0.0790861	0.376412	1	480	tags=11%, list=4%, signal=11%
HALLMARK_MITOTIC_SPINDLE	HALLMARK_MITOTIC_SPINDLE		173	0.304314	1.25282	0.0591304	0.377642	1	2165	tags=28%, list=19%, signal=34%
PID_PI3KCI_AKT_PATHWAY	PID_PI3KCI_AKT_PATHWAY		29	0.413585	1.25268	0.15625	0.37775	1	1119	tags=17%, list=10%, signal=19%
REACTOME_DEADENYLATION_DEPENDENT_MRNA_DECAY	REACTOME_DEADENYLATION_DEPENDENT_MRNA_DECAY		41	0.380404	1.2526	0.132325	0.377691	1	2940	tags=39%, list=25%, signal=52%
GSE30962_PRIMARY_VS_SECONDARY_CHRONIC_LCMV_INF_CD8_TCELL_UP	GSE30962_PRIMARY_VS_SECONDARY_CHRONIC_LCMV_INF_CD8_TCELL_UP		168	0.302963	1.25254	0.0700855	0.37762	1	1822	tags=24%, list=16%, signal=28%
RIZKI_TUMOR_INVASIVENESS_2D_DN	RIZKI_TUMOR_INVASIVENESS_2D_DN		46	0.374765	1.25198	0.137931	0.378755	1	1644	tags=26%, list=14%, signal=30%
GSE17721_POLYIC_VS_GARDIQUIMOD_24H_BMDC_DN	GSE17721_POLYIC_VS_GARDIQUIMOD_24H_BMDC_DN		171	0.304968	1.25122	0.0586207	0.380375	1	2777	tags=31%, list=24%, signal=40%
GSE10240_IL22_VS_IL17_STIM_PRIMARY_BRONCHIAL_EPITHELIAL_CELLS_UP	GSE10240_IL22_VS_IL17_STIM_PRIMARY_BRONCHIAL_EPITHELIAL_CELLS_UP		168	0.304316	1.2505	0.0567376	0.381967	1	1188	tags=17%, list=10%, signal=18%
GO_ENDORIBONUCLEASE_ACTIVITY	GO_ENDORIBONUCLEASE_ACTIVITY		39	0.387919	1.25049	0.147748	0.381717	1	828	tags=21%, list=7%, signal=22%
GO_SMOOTH_MUSCLE_CELL_DIFFERENTIATION	GO_SMOOTH_MUSCLE_CELL_DIFFERENTIATION		21	0.44327	1.25041	0.166045	0.38168	1	807	tags=14%, list=7%, signal=15%
PID_P73PATHWAY	PID_P73PATHWAY		60	0.353117	1.24983	0.129799	0.382925	1	1756	tags=28%, list=15%, signal=33%
GSE411_UNSTIM_VS_400MIN_IL6_STIM_MACROPHAGE_DN	GSE411_UNSTIM_VS_400MIN_IL6_STIM_MACROPHAGE_DN		164	0.303148	1.24947	0.0650685	0.38361	1	2271	tags=26%, list=20%, signal=32%
GO_NUCLEOSIDE_BISPHOSPHATE_METABOLIC_PROCESS	GO_NUCLEOSIDE_BISPHOSPHATE_METABOLIC_PROCESS		26	0.41787	1.24907	0.172862	0.384393	1	1325	tags=23%, list=11%, signal=26%
CTCTATG_MIR368	CTCTATG_MIR368		23	0.442061	1.24904	0.184211	0.384213	1	2415	tags=30%, list=21%, signal=38%
GSE15659_NAIVE_VS_PTPRC_NEG_CD4_TCELL_UP	GSE15659_NAIVE_VS_PTPRC_NEG_CD4_TCELL_UP		105	0.328721	1.24892	0.10772	0.384266	1	2153	tags=25%, list=19%, signal=30%
GO_CYSTEINE_TYPE_ENDOPEPTIDASE_INHIBITOR_ACTIVITY_INVOLVED_IN_APOPTOTIC_PROCESS	GO_CYSTEINE_TYPE_ENDOPEPTIDASE_INHIBITOR_ACTIVITY_INVOLVED_IN_APOPTOTIC_PROCESS		17	0.463591	1.24831	0.196078	0.385583	1	799	tags=24%, list=7%, signal=25%
GNF2_CD7	GNF2_CD7		22	0.443651	1.2483	0.201087	0.385347	1	1955	tags=32%, list=17%, signal=38%
MCCABE_HOXC6_TARGETS_CANCER_DN	MCCABE_HOXC6_TARGETS_CANCER_DN		17	0.463294	1.24822	0.163445	0.385289	1	1039	tags=29%, list=9%, signal=32%
GSE20727_CTRL_VS_ROS_INHIBITOR_TREATED_DC_UP	GSE20727_CTRL_VS_ROS_INHIBITOR_TREATED_DC_UP		172	0.303357	1.24813	0.0752688	0.385265	1	3195	tags=40%, list=28%, signal=54%
GO_TOXIN_TRANSPORT	GO_TOXIN_TRANSPORT		28	0.415018	1.24766	0.166983	0.38622	1	1156	tags=29%, list=10%, signal=32%
GO_ORGANELLE_ENVELOPE_LUMEN	GO_ORGANELLE_ENVELOPE_LUMEN		61	0.35701	1.24764	0.146474	0.386013	1	1792	tags=21%, list=15%, signal=25%
GSE17721_LPS_VS_POLYIC_4H_BMDC_DN	GSE17721_LPS_VS_POLYIC_4H_BMDC_DN		156	0.305904	1.24736	0.0719425	0.386474	1	1730	tags=22%, list=15%, signal=26%
GO_POSITIVE_REGULATION_OF_CELL_CYCLE	GO_POSITIVE_REGULATION_OF_CELL_CYCLE		231	0.291481	1.24726	0.0587219	0.386493	1	1906	tags=24%, list=16%, signal=28%
GSE24671_BAKIMULC_VS_SENDAI_VIRUS_INFECTED_MOUSE_SPLENOCYTES_DN	GSE24671_BAKIMULC_VS_SENDAI_VIRUS_INFECTED_MOUSE_SPLENOCYTES_DN		164	0.306235	1.24718	0.0728814	0.386429	1	3407	tags=40%, list=29%, signal=55%
PYEON_CANCER_HEAD_AND_NECK_VS_CERVICAL_UP	PYEON_CANCER_HEAD_AND_NECK_VS_CERVICAL_UP		143	0.307293	1.24718	0.0769231	0.386179	1	2314	tags=29%, list=20%, signal=36%
YAO_TEMPORAL_RESPONSE_TO_PROGESTERONE_CLUSTER_1	YAO_TEMPORAL_RESPONSE_TO_PROGESTERONE_CLUSTER_1		47	0.374081	1.24713	0.132075	0.386058	1	615	tags=17%, list=5%, signal=18%
RAY_TUMORIGENESIS_BY_ERBB2_CDC25A_UP	RAY_TUMORIGENESIS_BY_ERBB2_CDC25A_UP		62	0.353644	1.24704	0.139048	0.386063	1	1573	tags=23%, list=14%, signal=26%
GSE17186_MEMORY_VS_CD21LOW_TRANSITIONAL_BCELL_DN	GSE17186_MEMORY_VS_CD21LOW_TRANSITIONAL_BCELL_DN		159	0.301091	1.24688	0.0701439	0.386208	1	2390	tags=27%, list=21%, signal=34%
GO_MEIOSIS_I	GO_MEIOSIS_I		48	0.367678	1.24685	0.133333	0.386031	1	3045	tags=48%, list=26%, signal=65%
GSE12392_WT_VS_IFNB_KO_CD8A_POS_SPLEEN_DC_DN	GSE12392_WT_VS_IFNB_KO_CD8A_POS_SPLEEN_DC_DN		116	0.31824	1.24682	0.0781818	0.385874	1	2075	tags=23%, list=18%, signal=28%
YAO_TEMPORAL_RESPONSE_TO_PROGESTERONE_CLUSTER_17	YAO_TEMPORAL_RESPONSE_TO_PROGESTERONE_CLUSTER_17		159	0.310376	1.24681	0.077193	0.385644	1	2477	tags=30%, list=21%, signal=37%
GSE22611_UNSTIM_VS_2H_MDP_STIM_MUTANT_NOD2_TRANSDUCED_HEK293T_CELL_UP	GSE22611_UNSTIM_VS_2H_MDP_STIM_MUTANT_NOD2_TRANSDUCED_HEK293T_CELL_UP		153	0.303704	1.24621	0.0632911	0.386873	1	2504	tags=29%, list=22%, signal=36%
GCM_APEX1	GCM_APEX1		110	0.31978	1.2462	0.118095	0.386652	1	2606	tags=28%, list=23%, signal=36%
GSE5589_LPS_VS_LPS_AND_IL10_STIM_IL10_KO_MACROPHAGE_180MIN_UP	GSE5589_LPS_VS_LPS_AND_IL10_STIM_IL10_KO_MACROPHAGE_180MIN_UP		104	0.325315	1.24611	0.108818	0.386629	1	1127	tags=18%, list=10%, signal=20%
GO_ANAPHASE_PROMOTING_COMPLEX_DEPENDENT_CATABOLIC_PROCESS	GO_ANAPHASE_PROMOTING_COMPLEX_DEPENDENT_CATABOLIC_PROCESS		70	0.342349	1.24589	0.120658	0.386936	1	2545	tags=36%, list=22%, signal=45%
GO_REGULATION_OF_CELL_CYCLE_PHASE_TRANSITION	GO_REGULATION_OF_CELL_CYCLE_PHASE_TRANSITION		258	0.286207	1.2456	0.0586265	0.387416	1	2655	tags=34%, list=23%, signal=43%
GSE21927_SPLENIC_C26GM_TUMOROUS_VS_BONE_MARROW_MONOCYTES_UP	GSE21927_SPLENIC_C26GM_TUMOROUS_VS_BONE_MARROW_MONOCYTES_UP		79	0.336781	1.24515	0.0961888	0.388354	1	2722	tags=37%, list=24%, signal=48%
MORF_DEAF1	MORF_DEAF1		51	0.367141	1.24472	0.142593	0.389167	1	1734	tags=27%, list=15%, signal=32%
GNF2_MSH6	GNF2_MSH6		30	0.406329	1.24461	0.169776	0.389207	1	1778	tags=40%, list=15%, signal=47%
GO_HYDROLASE_ACTIVITY_ACTING_ON_CARBON_NITROGEN_BUT_NOT_PEPTIDE_BONDS_IN_LINEAR_AMIDES	GO_HYDROLASE_ACTIVITY_ACTING_ON_CARBON_NITROGEN_BUT_NOT_PEPTIDE_BONDS_IN_LINEAR_AMIDES		64	0.349814	1.24435	0.121996	0.389577	1	634	tags=11%, list=5%, signal=12%
GSE5099_MONOCYTE_VS_CLASSICAL_M1_MACROPHAGE_DN	GSE5099_MONOCYTE_VS_CLASSICAL_M1_MACROPHAGE_DN		157	0.307132	1.24401	0.0742049	0.390204	1	1437	tags=18%, list=12%, signal=21%
GO_NUCLEAR_SPECK	GO_NUCLEAR_SPECK		164	0.301647	1.2439	0.0695187	0.39025	1	2777	tags=32%, list=24%, signal=42%
CYCLIN_D1_KE_.V1_UP	CYCLIN_D1_KE_.V1_UP		132	0.312047	1.24321	0.095064	0.39178	1	1826	tags=23%, list=16%, signal=28%
GO_RNA_CAPPING	GO_RNA_CAPPING		34	0.402776	1.24267	0.168856	0.392891	1	1014	tags=18%, list=9%, signal=19%
DITTMER_PTHLH_TARGETS_UP	DITTMER_PTHLH_TARGETS_UP		96	0.322409	1.24216	0.0961888	0.393942	1	2557	tags=35%, list=22%, signal=45%
JI_RESPONSE_TO_FSH_UP	JI_RESPONSE_TO_FSH_UP		56	0.364183	1.24189	0.140138	0.394377	1	627	tags=16%, list=5%, signal=17%
GSE15330_HSC_VS_LYMPHOID_PRIMED_MULTIPOTENT_PROGENITOR_DN	GSE15330_HSC_VS_LYMPHOID_PRIMED_MULTIPOTENT_PROGENITOR_DN		153	0.30585	1.24166	0.0784314	0.394736	1	1635	tags=24%, list=14%, signal=27%
CHR20Q11	CHR20Q11		66	0.349374	1.24124	0.136531	0.395581	1	1662	tags=23%, list=14%, signal=26%
GSE1448_ANTI_VALPHA2_VS_VBETA5_DP_THYMOCYTE_UP	GSE1448_ANTI_VALPHA2_VS_VBETA5_DP_THYMOCYTE_UP		148	0.305146	1.24098	0.0577933	0.396019	1	2026	tags=23%, list=17%, signal=27%
GO_FEMALE_MEIOTIC_DIVISION	GO_FEMALE_MEIOTIC_DIVISION		16	0.474456	1.24091	0.185662	0.395936	1	1553	tags=31%, list=13%, signal=36%
GSE24634_NAIVE_CD4_TCELL_VS_DAY10_IL4_CONV_TREG_DN	GSE24634_NAIVE_CD4_TCELL_VS_DAY10_IL4_CONV_TREG_DN		186	0.296756	1.24052	0.0739496	0.396732	1	1838	tags=23%, list=16%, signal=26%
GSE6259_DEC205_POS_DC_VS_BCELL_UP	GSE6259_DEC205_POS_DC_VS_BCELL_UP		52	0.356891	1.23969	0.147059	0.398602	1	1347	tags=21%, list=12%, signal=24%
GSE5589_WT_VS_IL10_KO_LPS_AND_IL10_STIM_MACROPHAGE_180MIN_UP	GSE5589_WT_VS_IL10_KO_LPS_AND_IL10_STIM_MACROPHAGE_180MIN_UP		109	0.318055	1.23968	0.0996503	0.39836	1	3186	tags=41%, list=28%, signal=56%
GO_MACROAUTOPHAGY	GO_MACROAUTOPHAGY		203	0.295001	1.23964	0.0516351	0.398228	1	1951	tags=18%, list=17%, signal=21%
MORF_HDAC1	MORF_HDAC1		246	0.286025	1.2394	0.0541455	0.398614	1	3497	tags=41%, list=30%, signal=58%
GO_DNA_TEMPLATED_TRANSCRIPTION_INITIATION	GO_DNA_TEMPLATED_TRANSCRIPTION_INITIATION		155	0.301243	1.2391	0.0772128	0.399176	1	1850	tags=23%, list=16%, signal=27%
GSE14000_TRANSLATED_RNA_VS_MRNA_DC_UP	GSE14000_TRANSLATED_RNA_VS_MRNA_DC_UP		182	0.297792	1.23905	0.0649123	0.399042	1	2482	tags=29%, list=21%, signal=36%
GSE41867_DAY8_VS_DAY15_LCMV_ARMSTRONG_EFFECTOR_CD8_TCELL_DN	GSE41867_DAY8_VS_DAY15_LCMV_ARMSTRONG_EFFECTOR_CD8_TCELL_DN		52	0.364238	1.23888	0.153169	0.399208	1	961	tags=17%, list=8%, signal=19%
CHR16P13	CHR16P13		146	0.303153	1.23884	0.0892532	0.399064	1	2645	tags=26%, list=23%, signal=33%
KEGG_BASE_EXCISION_REPAIR	KEGG_BASE_EXCISION_REPAIR		34	0.396895	1.23861	0.170732	0.399419	1	2299	tags=35%, list=20%, signal=44%
LANDIS_ERBB2_BREAST_TUMORS_65_DN	LANDIS_ERBB2_BREAST_TUMORS_65_DN		22	0.440225	1.23851	0.196941	0.399433	1	1783	tags=32%, list=15%, signal=38%
TTGGAGA_MIR5155P_MIR519E	TTGGAGA_MIR5155P_MIR519E		98	0.323805	1.23847	0.0954955	0.39929	1	2729	tags=32%, list=24%, signal=41%
GSE7400_CTRL_VS_CSF3_IN_VIVO_TREATED_PBMC_UP	GSE7400_CTRL_VS_CSF3_IN_VIVO_TREATED_PBMC_UP		161	0.301822	1.2384	0.0704225	0.399223	1	1833	tags=19%, list=16%, signal=23%
GSE25146_UNSTIM_VS_HELIOBACTER_PYLORI_LPS_STIM_AGS_CELL_UP	GSE25146_UNSTIM_VS_HELIOBACTER_PYLORI_LPS_STIM_AGS_CELL_UP		149	0.303429	1.23829	0.0766551	0.399263	1	2791	tags=36%, list=24%, signal=46%
MORF_PPP2CA	MORF_PPP2CA		123	0.318907	1.23827	0.105647	0.399075	1	2360	tags=27%, list=20%, signal=33%
GSE7831_1H_VS_4H_CPG_STIM_PDC_UP	GSE7831_1H_VS_4H_CPG_STIM_PDC_UP		141	0.310087	1.23819	0.104505	0.399039	1	2480	tags=29%, list=21%, signal=37%
GSE18281_PERIMEDULLARY_CORTICAL_REGION_VS_WHOLE_CORTEX_THYMUS_UP	GSE18281_PERIMEDULLARY_CORTICAL_REGION_VS_WHOLE_CORTEX_THYMUS_UP		141	0.307865	1.23795	0.079932	0.399421	1	1762	tags=23%, list=15%, signal=26%
GO_POSITIVE_REGULATION_OF_NUCLEAR_DIVISION	GO_POSITIVE_REGULATION_OF_NUCLEAR_DIVISION		33	0.399364	1.23787	0.163188	0.399396	1	2335	tags=42%, list=20%, signal=53%
GSE19825_NAIVE_VS_IL2RAHIGH_DAY3_EFF_CD8_TCELL_DN	GSE19825_NAIVE_VS_IL2RAHIGH_DAY3_EFF_CD8_TCELL_DN		172	0.301018	1.23756	0.079646	0.399933	1	3538	tags=40%, list=31%, signal=56%
GO_NUCLEASE_ACTIVITY	GO_NUCLEASE_ACTIVITY		158	0.304073	1.23752	0.0780399	0.399794	1	2666	tags=31%, list=23%, signal=40%
PEDERSEN_METASTASIS_BY_ERBB2_ISOFORM_7	PEDERSEN_METASTASIS_BY_ERBB2_ISOFORM_7		284	0.283134	1.2375	0.0519931	0.399593	1	1890	tags=23%, list=16%, signal=27%
GSE2706_R848_VS_LPS_2H_STIM_DC_UP	GSE2706_R848_VS_LPS_2H_STIM_DC_UP		72	0.340186	1.23738	0.131238	0.399648	1	2248	tags=28%, list=19%, signal=34%
STAEGE_EWING_FAMILY_TUMOR	STAEGE_EWING_FAMILY_TUMOR		15	0.479031	1.23704	0.198488	0.400288	1	694	tags=20%, list=6%, signal=21%
GO_REGULATION_OF_LIGASE_ACTIVITY	GO_REGULATION_OF_LIGASE_ACTIVITY		114	0.319677	1.2369	0.0905923	0.400386	1	1829	tags=28%, list=16%, signal=33%
GO_NEGATIVE_REGULATION_OF_CELL_CYCLE_G2_M_PHASE_TRANSITION	GO_NEGATIVE_REGULATION_OF_CELL_CYCLE_G2_M_PHASE_TRANSITION		21	0.436725	1.23682	0.197652	0.400349	1	2394	tags=52%, list=21%, signal=66%
NAGY_TFTC_COMPONENTS_HUMAN	NAGY_TFTC_COMPONENTS_HUMAN		16	0.453821	1.23668	0.204842	0.400445	1	3268	tags=44%, list=28%, signal=61%
GO_MICROTUBULE_ORGANIZING_CENTER_PART	GO_MICROTUBULE_ORGANIZING_CENTER_PART		109	0.318176	1.2365	0.103328	0.400687	1	2137	tags=32%, list=18%, signal=39%
GO_PLATELET_DERIVED_GROWTH_FACTOR_RECEPTOR_SIGNALING_PATHWAY	GO_PLATELET_DERIVED_GROWTH_FACTOR_RECEPTOR_SIGNALING_PATHWAY		27	0.421468	1.23629	0.180791	0.401009	1	987	tags=11%, list=9%, signal=12%
PID_HEDGEHOG_GLI_PATHWAY	PID_HEDGEHOG_GLI_PATHWAY		36	0.389235	1.23549	0.174688	0.402829	1	1988	tags=28%, list=17%, signal=33%
GO_DNA_DIRECTED_RNA_POLYMERASE_II_HOLOENZYME	GO_DNA_DIRECTED_RNA_POLYMERASE_II_HOLOENZYME		88	0.325216	1.23514	0.106762	0.40349	1	2914	tags=35%, list=25%, signal=47%
GO_ORGANELLE_ASSEMBLY	GO_ORGANELLE_ASSEMBLY		339	0.275838	1.23491	0.0355932	0.403824	1	2227	tags=24%, list=19%, signal=29%
GSE24634_NAIVE_CD4_TCELL_VS_DAY3_IL4_CONV_TREG_DN	GSE24634_NAIVE_CD4_TCELL_VS_DAY3_IL4_CONV_TREG_DN		181	0.297706	1.23482	0.0971731	0.40382	1	1608	tags=22%, list=14%, signal=25%
GSE40666_STAT1_KO_VS_STAT4_KO_CD8_TCELL_WITH_IFNA_STIM_90MIN_UP	GSE40666_STAT1_KO_VS_STAT4_KO_CD8_TCELL_WITH_IFNA_STIM_90MIN_UP		165	0.301188	1.23451	0.0630798	0.404381	1	2031	tags=24%, list=18%, signal=29%
MORF_BECN1	MORF_BECN1		94	0.32472	1.23414	0.120075	0.405113	1	2353	tags=28%, list=20%, signal=34%
GO_EPIDERMAL_CELL_DIFFERENTIATION	GO_EPIDERMAL_CELL_DIFFERENTIATION		53	0.358117	1.23405	0.15493	0.405073	1	2359	tags=23%, list=20%, signal=28%
GO_PROTEIN_DEACETYLASE_ACTIVITY	GO_PROTEIN_DEACETYLASE_ACTIVITY		38	0.381641	1.23398	0.153271	0.405035	1	634	tags=16%, list=5%, signal=17%
GSE27786_LSK_VS_ERYTHROBLAST_DN	GSE27786_LSK_VS_ERYTHROBLAST_DN		95	0.32228	1.23367	0.10991	0.405558	1	1828	tags=26%, list=16%, signal=31%
GO_CARDIAC_CHAMBER_DEVELOPMENT	GO_CARDIAC_CHAMBER_DEVELOPMENT		71	0.337473	1.23339	0.130275	0.406067	1	932	tags=14%, list=8%, signal=15%
GO_METHYLATION	GO_METHYLATION		191	0.295454	1.23324	0.0692718	0.406195	1	2256	tags=28%, list=19%, signal=34%
GSE15750_WT_VS_TRAF6KO_DAY10_EFF_CD8_TCELL_UP	GSE15750_WT_VS_TRAF6KO_DAY10_EFF_CD8_TCELL_UP		152	0.307522	1.23323	0.100917	0.405954	1	2378	tags=30%, list=21%, signal=38%
REACTOME_RECRUITMENT_OF_MITOTIC_CENTROSOME_PROTEINS_AND_COMPLEXES	REACTOME_RECRUITMENT_OF_MITOTIC_CENTROSOME_PROTEINS_AND_COMPLEXES		57	0.354248	1.233	0.156604	0.406326	1	2120	tags=30%, list=18%, signal=36%
GO_SOMATIC_STEM_CELL_POPULATION_MAINTENANCE	GO_SOMATIC_STEM_CELL_POPULATION_MAINTENANCE		38	0.380314	1.23294	0.171846	0.406216	1	1014	tags=21%, list=9%, signal=23%
GO_POSITIVE_REGULATION_OF_MITOTIC_NUCLEAR_DIVISION	GO_POSITIVE_REGULATION_OF_MITOTIC_NUCLEAR_DIVISION		30	0.407797	1.23287	0.192378	0.40615	1	2335	tags=47%, list=20%, signal=58%
GSE360_L_MAJOR_VS_B_MALAYI_LOW_DOSE_MAC_DN	GSE360_L_MAJOR_VS_B_MALAYI_LOW_DOSE_MAC_DN		148	0.304547	1.23254	0.0878136	0.406791	1	2346	tags=31%, list=20%, signal=38%
GSE17721_CPG_VS_GARDIQUIMOD_1H_BMDC_DN	GSE17721_CPG_VS_GARDIQUIMOD_1H_BMDC_DN		171	0.299525	1.23254	0.0922242	0.406543	1	2100	tags=25%, list=18%, signal=30%
BENPORATH_NOS_TARGETS	BENPORATH_NOS_TARGETS		119	0.313271	1.23249	0.0985663	0.406411	1	2379	tags=25%, list=21%, signal=31%
GO_VESICLE_CYTOSKELETAL_TRAFFICKING	GO_VESICLE_CYTOSKELETAL_TRAFFICKING		29	0.405541	1.23247	0.184015	0.406204	1	2595	tags=38%, list=22%, signal=49%
GSE37336_LY6C_POS_VS_NEG_NAIVE_CD4_TCELL_UP	GSE37336_LY6C_POS_VS_NEG_NAIVE_CD4_TCELL_UP		101	0.320975	1.23208	0.1125	0.406982	1	2980	tags=35%, list=26%, signal=46%
GO_EXOPEPTIDASE_ACTIVITY	GO_EXOPEPTIDASE_ACTIVITY		55	0.362454	1.2312	0.149909	0.409031	1	1467	tags=24%, list=13%, signal=27%
TCF11_01	TCF11_01		139	0.307193	1.2311	0.0791367	0.409036	1	1589	tags=19%, list=14%, signal=22%
GO_MESENCHYME_MORPHOGENESIS	GO_MESENCHYME_MORPHOGENESIS		16	0.472273	1.23106	0.190741	0.408909	1	1904	tags=38%, list=16%, signal=45%
GO_TRANSFERASE_COMPLEX_TRANSFERRING_PHOSPHORUS_CONTAINING_GROUPS	GO_TRANSFERASE_COMPLEX_TRANSFERRING_PHOSPHORUS_CONTAINING_GROUPS		207	0.291645	1.23087	0.065371	0.409161	1	3088	tags=34%, list=27%, signal=45%
GEORGES_CELL_CYCLE_MIR192_TARGETS	GEORGES_CELL_CYCLE_MIR192_TARGETS		55	0.35837	1.23057	0.151341	0.409703	1	3321	tags=47%, list=29%, signal=66%
GO_RESPONSE_TO_AMMONIUM_ION	GO_RESPONSE_TO_AMMONIUM_ION		26	0.416297	1.23053	0.185118	0.409558	1	2887	tags=50%, list=25%, signal=66%
AFFAR_YY1_TARGETS_UP	AFFAR_YY1_TARGETS_UP		110	0.31752	1.23002	0.102334	0.410609	1	1007	tags=15%, list=9%, signal=17%
DUTERTRE_ESTRADIOL_RESPONSE_6HR_UP	DUTERTRE_ESTRADIOL_RESPONSE_6HR_UP		168	0.300172	1.22977	0.0752294	0.411046	1	1457	tags=21%, list=13%, signal=24%
GSE1460_CORD_VS_ADULT_BLOOD_NAIVE_CD4_TCELL_DN	GSE1460_CORD_VS_ADULT_BLOOD_NAIVE_CD4_TCELL_DN		176	0.296121	1.2297	0.0852576	0.410976	1	2744	tags=30%, list=24%, signal=38%
ZHOU_TNF_SIGNALING_4HR	ZHOU_TNF_SIGNALING_4HR		44	0.369946	1.22964	0.166058	0.410899	1	1700	tags=25%, list=15%, signal=29%
GO_ANION_TRANSMEMBRANE_TRANSPORTER_ACTIVITY	GO_ANION_TRANSMEMBRANE_TRANSPORTER_ACTIVITY		117	0.313855	1.22946	0.093913	0.41116	1	2990	tags=32%, list=26%, signal=42%
GO_DNA_DEALKYLATION	GO_DNA_DEALKYLATION		15	0.464828	1.2291	0.214971	0.41182	1	1356	tags=33%, list=12%, signal=38%
GSE3982_MEMORY_CD4_TCELL_VS_TH1_DN	GSE3982_MEMORY_CD4_TCELL_VS_TH1_DN		178	0.293966	1.22874	0.0860034	0.412534	1	1426	tags=24%, list=12%, signal=26%
GSE6259_FLT3L_INDUCED_DEC205_POS_DC_VS_BCELL_DN	GSE6259_FLT3L_INDUCED_DEC205_POS_DC_VS_BCELL_DN		124	0.314401	1.22863	0.107639	0.412576	1	1651	tags=26%, list=14%, signal=30%
GSE18893_TCONV_VS_TREG_24H_TNF_STIM_DN	GSE18893_TCONV_VS_TREG_24H_TNF_STIM_DN		137	0.304744	1.22847	0.0913884	0.412784	1	1662	tags=20%, list=14%, signal=24%
MORF_PPP2R5B	MORF_PPP2R5B		90	0.323187	1.22846	0.114963	0.412539	1	2516	tags=27%, list=22%, signal=34%
CHR12Q12	CHR12Q12		32	0.398915	1.2284	0.150909	0.412469	1	1604	tags=34%, list=14%, signal=40%
GSE9960_HEALTHY_VS_GRAM_POS_SEPSIS_PBMC_UP	GSE9960_HEALTHY_VS_GRAM_POS_SEPSIS_PBMC_UP		139	0.309341	1.22798	0.0990476	0.413343	1	2894	tags=39%, list=25%, signal=51%
MORF_CSNK1D	MORF_CSNK1D		64	0.344907	1.22789	0.145614	0.413309	1	2251	tags=31%, list=19%, signal=39%
GSE2706_UNSTIM_VS_2H_LPS_AND_R848_DC_UP	GSE2706_UNSTIM_VS_2H_LPS_AND_R848_DC_UP		147	0.302579	1.22759	0.103704	0.413862	1	2508	tags=27%, list=22%, signal=33%
GSE9509_LPS_VS_LPS_AND_IL10_STIM_IL10_KO_MACROPHAGE_30MIN_DN	GSE9509_LPS_VS_LPS_AND_IL10_STIM_IL10_KO_MACROPHAGE_30MIN_DN		141	0.307365	1.22755	0.0934744	0.413714	1	954	tags=16%, list=8%, signal=17%
MODULE_219	MODULE_219		24	0.42439	1.22753	0.191529	0.413501	1	1457	tags=29%, list=13%, signal=33%
IL2_UP.V1_DN	IL2_UP.V1_DN		87	0.330301	1.2275	0.119349	0.413329	1	2116	tags=26%, list=18%, signal=32%
GO_CHROMATIN_REMODELING	GO_CHROMATIN_REMODELING		113	0.317311	1.22707	0.107273	0.414241	1	2079	tags=27%, list=18%, signal=32%
GSE15930_NAIVE_VS_72H_IN_VITRO_STIM_CD8_TCELL_DN	GSE15930_NAIVE_VS_72H_IN_VITRO_STIM_CD8_TCELL_DN		174	0.298784	1.22706	0.0883392	0.414008	1	1812	tags=25%, list=16%, signal=29%
NFMUE1_Q6	NFMUE1_Q6		203	0.291087	1.22694	0.0797963	0.414059	1	3455	tags=37%, list=30%, signal=52%
GSE18791_UNSTIM_VS_NEWCATSLE_VIRUS_DC_6H_UP	GSE18791_UNSTIM_VS_NEWCATSLE_VIRUS_DC_6H_UP		167	0.29675	1.22671	0.0960549	0.414408	1	2297	tags=27%, list=20%, signal=33%
GSE9960_HEALTHY_VS_SEPSIS_PBMC_UP	GSE9960_HEALTHY_VS_SEPSIS_PBMC_UP		126	0.308914	1.22664	0.0977444	0.414334	1	2792	tags=33%, list=24%, signal=42%
TIEN_INTESTINE_PROBIOTICS_6HR_DN	TIEN_INTESTINE_PROBIOTICS_6HR_DN		138	0.305553	1.22634	0.101423	0.414911	1	2437	tags=29%, list=21%, signal=36%
GO_APICAL_JUNCTION_COMPLEX	GO_APICAL_JUNCTION_COMPLEX		64	0.343137	1.22624	0.144366	0.414908	1	1545	tags=22%, list=13%, signal=25%
MORF_RAD21	MORF_RAD21		175	0.298239	1.22604	0.0905983	0.415203	1	2851	tags=34%, list=25%, signal=45%
GSE14308_TH1_VS_INDUCED_TREG_DN	GSE14308_TH1_VS_INDUCED_TREG_DN		149	0.300393	1.22562	0.116788	0.416048	1	2169	tags=24%, list=19%, signal=29%
GSE22432_MULTIPOTENT_VS_COMMON_DC_PROGENITOR_UNTREATED_UP	GSE22432_MULTIPOTENT_VS_COMMON_DC_PROGENITOR_UNTREATED_UP		178	0.297138	1.22556	0.0769231	0.415946	1	1894	tags=22%, list=16%, signal=26%
CHNG_MULTIPLE_MYELOMA_HYPERPLOID_DN	CHNG_MULTIPLE_MYELOMA_HYPERPLOID_DN		25	0.420952	1.22547	0.181019	0.415927	1	2882	tags=44%, list=25%, signal=58%
GRYDER_PAX3FOXO1_TOP_ENHANCERS	GRYDER_PAX3FOXO1_TOP_ENHANCERS		339	0.27548	1.22515	0.0327022	0.416544	1	2460	tags=28%, list=21%, signal=35%
GSE14415_NATURAL_TREG_VS_TCONV_UP	GSE14415_NATURAL_TREG_VS_TCONV_UP		112	0.309936	1.22498	0.0981067	0.416767	1	1469	tags=15%, list=13%, signal=17%
GSE26669_CTRL_VS_COSTIM_BLOCK_MLR_CD8_TCELL_UP	GSE26669_CTRL_VS_COSTIM_BLOCK_MLR_CD8_TCELL_UP		171	0.297035	1.22493	0.1019	0.416641	1	2854	tags=36%, list=25%, signal=47%
GSE41867_NAIVE_VS_DAY15_LCMV_CONE13_EFFECTOR_CD8_TCELL_DN	GSE41867_NAIVE_VS_DAY15_LCMV_CONE13_EFFECTOR_CD8_TCELL_DN		141	0.305077	1.22475	0.1	0.416872	1	2645	tags=34%, list=23%, signal=44%
GSE5542_UNTREATED_VS_IFNA_AND_IFNG_TREATED_EPITHELIAL_CELLS_24H_UP	GSE5542_UNTREATED_VS_IFNA_AND_IFNG_TREATED_EPITHELIAL_CELLS_24H_UP		154	0.300178	1.22455	0.0887681	0.417191	1	2439	tags=32%, list=21%, signal=41%
GO_GLUCAN_BIOSYNTHETIC_PROCESS	GO_GLUCAN_BIOSYNTHETIC_PROCESS		16	0.481126	1.22442	0.220952	0.417264	1	2098	tags=44%, list=18%, signal=53%
GSE27786_CD8_TCELL_VS_MONO_MAC_DN	GSE27786_CD8_TCELL_VS_MONO_MAC_DN		127	0.310401	1.22393	0.0982143	0.41826	1	1613	tags=22%, list=14%, signal=25%
HU_ANGIOGENESIS_DN	HU_ANGIOGENESIS_DN		32	0.397436	1.22379	0.174397	0.418386	1	2364	tags=28%, list=20%, signal=35%
GSE41867_NAIVE_VS_DAY15_LCMV_EFFECTOR_CD8_TCELL_UP	GSE41867_NAIVE_VS_DAY15_LCMV_EFFECTOR_CD8_TCELL_UP		172	0.295115	1.22379	0.0808824	0.418134	1	2992	tags=31%, list=26%, signal=42%
STK33_NOMO_DN	STK33_NOMO_DN		170	0.297916	1.2231	0.0864662	0.419704	1	1840	tags=23%, list=16%, signal=27%
GSE22589_HEALTHY_VS_HIV_INFECTED_DC_UP	GSE22589_HEALTHY_VS_HIV_INFECTED_DC_UP		158	0.297366	1.22304	0.0947368	0.419621	1	2444	tags=27%, list=21%, signal=34%
GSE11057_NAIVE_CD4_VS_PBMC_CD4_TCELL_UP	GSE11057_NAIVE_CD4_VS_PBMC_CD4_TCELL_UP		143	0.301571	1.22285	0.103131	0.419882	1	2095	tags=22%, list=18%, signal=26%
GSE11864_CSF1_VS_CSF1_IFNG_PAM3CYS_IN_MAC_UP	GSE11864_CSF1_VS_CSF1_IFNG_PAM3CYS_IN_MAC_UP		150	0.300314	1.22227	0.0962199	0.421188	1	2747	tags=31%, list=24%, signal=40%
MORF_PTEN	MORF_PTEN		55	0.350174	1.22222	0.146429	0.421074	1	2105	tags=31%, list=18%, signal=38%
MCCABE_HOXC6_TARGETS_CANCER_UP	MCCABE_HOXC6_TARGETS_CANCER_UP		16	0.4552	1.22215	0.224638	0.420999	1	1077	tags=25%, list=9%, signal=28%
YAMASHITA_LIVER_CANCER_STEM_CELL_DN	YAMASHITA_LIVER_CANCER_STEM_CELL_DN		33	0.386081	1.22146	0.193015	0.422552	1	3004	tags=39%, list=26%, signal=53%
WU_HBX_TARGETS_2_UP	WU_HBX_TARGETS_2_UP		18	0.457027	1.22124	0.206379	0.422923	1	2602	tags=33%, list=22%, signal=43%
GO_REGULATION_OF_PROTEIN_UBIQUITINATION_INVOLVED_IN_UBIQUITIN_DEPENDENT_PROTEIN_CATABOLIC_PROCESS	GO_REGULATION_OF_PROTEIN_UBIQUITINATION_INVOLVED_IN_UBIQUITIN_DEPENDENT_PROTEIN_CATABOLIC_PROCESS		87	0.325662	1.2211	0.137184	0.423059	1	2335	tags=31%, list=20%, signal=39%
GO_PROTEIN_HOMOTETRAMERIZATION	GO_PROTEIN_HOMOTETRAMERIZATION		41	0.379505	1.22104	0.174775	0.42297	1	1827	tags=27%, list=16%, signal=32%
GO_AUTOPHAGY	GO_AUTOPHAGY		296	0.27839	1.22085	0.0627119	0.423222	1	1951	tags=17%, list=17%, signal=20%
GSE22886_NAIVE_BCELL_VS_BLOOD_PLASMA_CELL_DN	GSE22886_NAIVE_BCELL_VS_BLOOD_PLASMA_CELL_DN		180	0.293483	1.22083	0.0982456	0.423009	1	2918	tags=34%, list=25%, signal=45%
GNF2_NS	GNF2_NS		37	0.387528	1.22066	0.172222	0.423213	1	2864	tags=46%, list=25%, signal=61%
GO_EPITHELIAL_CELL_APOPTOTIC_PROCESS	GO_EPITHELIAL_CELL_APOPTOTIC_PROCESS		16	0.472036	1.22059	0.223735	0.423154	1	1535	tags=25%, list=13%, signal=29%
GSE3982_MAC_VS_NKCELL_DN	GSE3982_MAC_VS_NKCELL_DN		116	0.310773	1.22033	0.109375	0.423621	1	2067	tags=26%, list=18%, signal=31%
GO_POSITIVE_REGULATION_OF_RESPONSE_TO_DNA_DAMAGE_STIMULUS	GO_POSITIVE_REGULATION_OF_RESPONSE_TO_DNA_DAMAGE_STIMULUS		49	0.359633	1.22022	0.158879	0.423672	1	1407	tags=24%, list=12%, signal=28%
MORF_SOD1	MORF_SOD1		269	0.279068	1.21958	0.0629371	0.425197	1	2851	tags=32%, list=25%, signal=41%
GO_PROTEIN_UBIQUITINATION_INVOLVED_IN_UBIQUITIN_DEPENDENT_PROTEIN_CATABOLIC_PROCESS	GO_PROTEIN_UBIQUITINATION_INVOLVED_IN_UBIQUITIN_DEPENDENT_PROTEIN_CATABOLIC_PROCESS		109	0.310116	1.21906	0.120996	0.426409	1	2406	tags=30%, list=21%, signal=38%
GO_OXIDOREDUCTASE_ACTIVITY_ACTING_ON_PAIRED_DONORS_WITH_INCORPORATION_OR_REDUCTION_OF_MOLECULAR_OXYGEN_2_OXOGLUTARATE_AS_ONE_DONOR_AND_INCORPORATION_OF_ONE_ATOM_EACH_OF_OXYGEN_INTO_BOTH_DONORS	GO_OXIDOREDUCTASE_ACTIVITY_ACTING_ON_PAIRED_DONORS_WITH_INCORPORATION_OR_REDUCTION_OF_MOLECULAR_OXYGEN_2_OXOGLUTARATE_AS_ONE_DONOR_AND_INCORPORATION_OF_ONE_ATOM_EACH_OF_OXYGEN_INTO_BOTH_DONORS		32	0.398873	1.21905	0.191205	0.426184	1	3437	tags=44%, list=30%, signal=62%
MORI_EMU_MYC_LYMPHOMA_BY_ONSET_TIME_UP	MORI_EMU_MYC_LYMPHOMA_BY_ONSET_TIME_UP		92	0.321433	1.2183	0.131179	0.427996	1	2794	tags=37%, list=24%, signal=48%
GO_S_ADENOSYLMETHIONINE_DEPENDENT_METHYLTRANSFERASE_ACTIVITY	GO_S_ADENOSYLMETHIONINE_DEPENDENT_METHYLTRANSFERASE_ACTIVITY		96	0.317395	1.21809	0.120921	0.428314	1	2546	tags=33%, list=22%, signal=42%
GSE19888_ADENOSINE_A3R_ACT_VS_A3R_ACT_WITH_A3R_INH_PRETREATMENT_IN_MAST_CELL_UP	GSE19888_ADENOSINE_A3R_ACT_VS_A3R_ACT_WITH_A3R_INH_PRETREATMENT_IN_MAST_CELL_UP		163	0.294862	1.21771	0.0865724	0.429088	1	2722	tags=31%, list=24%, signal=40%
REACTOME_MITOTIC_G1_G1_S_PHASES	REACTOME_MITOTIC_G1_G1_S_PHASES		126	0.310614	1.21755	0.118738	0.429273	1	2997	tags=40%, list=26%, signal=53%
GO_UBIQUITIN_LIKE_PROTEIN_SPECIFIC_PROTEASE_ACTIVITY	GO_UBIQUITIN_LIKE_PROTEIN_SPECIFIC_PROTEASE_ACTIVITY		76	0.334909	1.21676	0.15508	0.431167	1	3548	tags=41%, list=31%, signal=58%
GO_PROTEIN_MODIFICATION_BY_SMALL_PROTEIN_REMOVAL	GO_PROTEIN_MODIFICATION_BY_SMALL_PROTEIN_REMOVAL		91	0.324656	1.21675	0.143116	0.430945	1	2449	tags=27%, list=21%, signal=35%
WANG_HCP_PROSTATE_CANCER	WANG_HCP_PROSTATE_CANCER		87	0.326526	1.21667	0.139785	0.43091	1	1959	tags=23%, list=17%, signal=27%
GSE7831_1H_VS_4H_CPG_STIM_PDC_DN	GSE7831_1H_VS_4H_CPG_STIM_PDC_DN		149	0.298776	1.21626	0.110912	0.431737	1	2079	tags=23%, list=18%, signal=27%
GO_NUCLEOBASE_BIOSYNTHETIC_PROCESS	GO_NUCLEOBASE_BIOSYNTHETIC_PROCESS		18	0.445564	1.21615	0.222015	0.431769	1	1490	tags=28%, list=13%, signal=32%
GCATTTG_MIR105	GCATTTG_MIR105		123	0.306412	1.21612	0.113274	0.431595	1	1754	tags=21%, list=15%, signal=25%
GSE27786_BCELL_VS_MONO_MAC_UP	GSE27786_BCELL_VS_MONO_MAC_UP		171	0.294339	1.21605	0.1	0.43155	1	2710	tags=27%, list=23%, signal=35%
GSE37301_GRANULOCYTE_MONOCYTE_PROGENITOR_VS_RAG2_KO_NK_CELL_UP	GSE37301_GRANULOCYTE_MONOCYTE_PROGENITOR_VS_RAG2_KO_NK_CELL_UP		154	0.301155	1.216	0.0954064	0.431427	1	2673	tags=32%, list=23%, signal=41%
GSE12392_CD8A_POS_VS_NEG_SPLEEN_DC_DN	GSE12392_CD8A_POS_VS_NEG_SPLEEN_DC_DN		164	0.295745	1.21555	0.112069	0.432381	1	2439	tags=33%, list=21%, signal=41%
SESTO_RESPONSE_TO_UV_C6	SESTO_RESPONSE_TO_UV_C6		36	0.384857	1.21477	0.184502	0.434288	1	908	tags=22%, list=8%, signal=24%
GO_ASPARTATE_FAMILY_AMINO_ACID_BIOSYNTHETIC_PROCESS	GO_ASPARTATE_FAMILY_AMINO_ACID_BIOSYNTHETIC_PROCESS		19	0.441162	1.21461	0.223881	0.434477	1	2718	tags=37%, list=23%, signal=48%
GSE3982_EOSINOPHIL_VS_BCELL_DN	GSE3982_EOSINOPHIL_VS_BCELL_DN		171	0.293471	1.21456	0.0933099	0.434345	1	2403	tags=29%, list=21%, signal=36%
GSE43863_TFH_VS_LY6C_INT_CXCR5POS_MEMORY_CD4_TCELL_DN	GSE43863_TFH_VS_LY6C_INT_CXCR5POS_MEMORY_CD4_TCELL_DN		101	0.312446	1.21452	0.156794	0.43421	1	1173	tags=17%, list=10%, signal=19%
GO_PHOTORECEPTOR_CONNECTING_CILIUM	GO_PHOTORECEPTOR_CONNECTING_CILIUM		18	0.457405	1.21404	0.21172	0.435237	1	3651	tags=56%, list=32%, signal=81%
ACAWNRNSRCGG_UNKNOWN	ACAWNRNSRCGG_UNKNOWN		49	0.356408	1.21379	0.172285	0.435672	1	2195	tags=29%, list=19%, signal=35%
WANG_LMO4_TARGETS_UP	WANG_LMO4_TARGETS_UP		279	0.277978	1.21374	0.0562181	0.435561	1	2680	tags=30%, list=23%, signal=39%
GO_L_AMINO_ACID_TRANSPORT	GO_L_AMINO_ACID_TRANSPORT		27	0.413505	1.21344	0.207865	0.436155	1	526	tags=11%, list=5%, signal=12%
GO_MALE_GAMETE_GENERATION	GO_MALE_GAMETE_GENERATION		231	0.28376	1.21319	0.0669014	0.436584	1	1541	tags=19%, list=13%, signal=22%
GSE20727_CTRL_VS_ROS_INH_AND_DNFB_ALLERGEN_TREATED_DC_UP	GSE20727_CTRL_VS_ROS_INH_AND_DNFB_ALLERGEN_TREATED_DC_UP		163	0.298906	1.21283	0.0748175	0.437313	1	1826	tags=21%, list=16%, signal=25%
GO_CELLULAR_AMINO_ACID_BIOSYNTHETIC_PROCESS	GO_CELLULAR_AMINO_ACID_BIOSYNTHETIC_PROCESS		64	0.336203	1.21264	0.138989	0.437595	1	2844	tags=34%, list=25%, signal=45%
HOSHIDA_LIVER_CANCER_LATE_RECURRENCE_DN	HOSHIDA_LIVER_CANCER_LATE_RECURRENCE_DN		40	0.368977	1.21253	0.203971	0.437621	1	2196	tags=33%, list=19%, signal=40%
GSE27786_ERYTHROBLAST_VS_NEUTROPHIL_UP	GSE27786_ERYTHROBLAST_VS_NEUTROPHIL_UP		132	0.308617	1.21249	0.122711	0.437461	1	3307	tags=39%, list=29%, signal=55%
GSE29618_PRE_VS_DAY7_FLU_VACCINE_BCELL_DN	GSE29618_PRE_VS_DAY7_FLU_VACCINE_BCELL_DN		141	0.300459	1.21243	0.104317	0.43736	1	2637	tags=31%, list=23%, signal=40%
ONDER_CDH1_TARGETS_1_DN	ONDER_CDH1_TARGETS_1_DN		115	0.311012	1.2124	0.137011	0.437186	1	1814	tags=27%, list=16%, signal=32%
CHENG_RESPONSE_TO_NICKEL_ACETATE	CHENG_RESPONSE_TO_NICKEL_ACETATE		36	0.384207	1.21238	0.171076	0.436976	1	1330	tags=19%, list=11%, signal=22%
GAL_LEUKEMIC_STEM_CELL_UP	GAL_LEUKEMIC_STEM_CELL_UP		83	0.32425	1.21236	0.119403	0.436789	1	2910	tags=36%, list=25%, signal=48%
GCM_CSNK2B	GCM_CSNK2B		97	0.319471	1.21222	0.102787	0.43694	1	1807	tags=22%, list=16%, signal=25%
GSE12845_IGD_POS_BLOOD_VS_DARKZONE_GC_TONSIL_BCELL_DN	GSE12845_IGD_POS_BLOOD_VS_DARKZONE_GC_TONSIL_BCELL_DN		179	0.289038	1.21118	0.0802048	0.439564	1	2371	tags=25%, list=20%, signal=30%
GO_ORGANELLAR_LARGE_RIBOSOMAL_SUBUNIT	GO_ORGANELLAR_LARGE_RIBOSOMAL_SUBUNIT		30	0.405031	1.21112	0.201923	0.439491	1	3264	tags=47%, list=28%, signal=65%
GSE46606_DAY1_VS_DAY3_CD40L_IL2_IL5_STIMULATED_IRF4_KO_BCELL_UP	GSE46606_DAY1_VS_DAY3_CD40L_IL2_IL5_STIMULATED_IRF4_KO_BCELL_UP		105	0.313839	1.21103	0.121377	0.439456	1	3392	tags=40%, list=29%, signal=56%
GSE5589_LPS_VS_LPS_AND_IL10_STIM_IL6_KO_MACROPHAGE_180MIN_DN	GSE5589_LPS_VS_LPS_AND_IL10_STIM_IL6_KO_MACROPHAGE_180MIN_DN		162	0.291234	1.211	0.0920578	0.439287	1	1998	tags=22%, list=17%, signal=26%
GTCAGGA_MIR378	GTCAGGA_MIR378		37	0.383009	1.21096	0.211215	0.43913	1	2615	tags=35%, list=23%, signal=45%
GSE29618_MONOCYTE_VS_MDC_DAY7_FLU_VACCINE_DN	GSE29618_MONOCYTE_VS_MDC_DAY7_FLU_VACCINE_DN		171	0.292219	1.21074	0.0996441	0.439499	1	2034	tags=20%, list=18%, signal=24%
GSE24972_WT_VS_IRF8_KO_SPLEEN_FOLLICULAR_BCELL_DN	GSE24972_WT_VS_IRF8_KO_SPLEEN_FOLLICULAR_BCELL_DN		149	0.296984	1.21068	0.0920354	0.439399	1	1245	tags=19%, list=11%, signal=22%
HALLMARK_XENOBIOTIC_METABOLISM	HALLMARK_XENOBIOTIC_METABOLISM		127	0.302775	1.2105	0.107914	0.439678	1	2020	tags=21%, list=17%, signal=25%
GSE7460_CTRL_VS_FOXP3_OVEREXPR_TCONV_UP	GSE7460_CTRL_VS_FOXP3_OVEREXPR_TCONV_UP		92	0.319159	1.21029	0.125442	0.440013	1	1585	tags=23%, list=14%, signal=26%
CHR1Q21	CHR1Q21		140	0.299968	1.21027	0.121317	0.439818	1	1943	tags=22%, list=17%, signal=26%
GSE23984_CTRL_VS_HYPOCALEMIC_VITAMIND_ANALOG_TCELL_UP	GSE23984_CTRL_VS_HYPOCALEMIC_VITAMIND_ANALOG_TCELL_UP		151	0.29806	1.21016	0.0781528	0.439876	1	1214	tags=17%, list=10%, signal=18%
LIN_APC_TARGETS	LIN_APC_TARGETS		63	0.339083	1.20992	0.135135	0.440286	1	1636	tags=30%, list=14%, signal=35%
MORF_CDC10	MORF_CDC10		135	0.30274	1.20989	0.11204	0.440098	1	2598	tags=32%, list=22%, signal=41%
GO_SMOOTHENED_SIGNALING_PATHWAY	GO_SMOOTHENED_SIGNALING_PATHWAY		39	0.375425	1.20989	0.194595	0.439859	1	2596	tags=33%, list=22%, signal=43%
GOLDRATH_ANTIGEN_RESPONSE	GOLDRATH_ANTIGEN_RESPONSE		303	0.273254	1.20947	0.06914	0.440758	1	1652	tags=23%, list=14%, signal=27%
GSE23502_WT_VS_HDC_KO_MYELOID_DERIVED_SUPPRESSOR_CELL_COLON_TUMOR_UP	GSE23502_WT_VS_HDC_KO_MYELOID_DERIVED_SUPPRESSOR_CELL_COLON_TUMOR_UP		141	0.300189	1.20942	0.117754	0.440659	1	2449	tags=34%, list=21%, signal=43%
GO_MLL1_2_COMPLEX	GO_MLL1_2_COMPLEX		25	0.419635	1.20881	0.202226	0.442103	1	3088	tags=40%, list=27%, signal=54%
GSE2770_UNTREATED_VS_ACT_CD4_TCELL_2H_DN	GSE2770_UNTREATED_VS_ACT_CD4_TCELL_2H_DN		162	0.291594	1.20868	0.0891266	0.442205	1	1582	tags=19%, list=14%, signal=21%
GSE11961_MARGINAL_ZONE_BCELL_VS_PLASMA_CELL_DAY7_DN	GSE11961_MARGINAL_ZONE_BCELL_VS_PLASMA_CELL_DAY7_DN		138	0.302149	1.20843	0.119508	0.442668	1	2606	tags=31%, list=23%, signal=40%
OCT1_04	OCT1_04		117	0.306823	1.20799	0.131399	0.443616	1	2078	tags=23%, list=18%, signal=28%
GSE2585_THYMIC_DC_VS_MTEC_UP	GSE2585_THYMIC_DC_VS_MTEC_UP		131	0.304214	1.20782	0.114878	0.443834	1	1865	tags=19%, list=16%, signal=22%
GSE4142_NAIVE_VS_GC_BCELL_DN	GSE4142_NAIVE_VS_GC_BCELL_DN		136	0.300411	1.20775	0.0936396	0.443771	1	2385	tags=29%, list=21%, signal=36%
GO_CYTOPLASMIC_MRNA_PROCESSING_BODY	GO_CYTOPLASMIC_MRNA_PROCESSING_BODY		53	0.351362	1.2077	0.166972	0.443673	1	1012	tags=13%, list=9%, signal=14%
GSE37534_UNTREATED_VS_GW1929_TREATED_CD4_TCELL_PPARG1_AND_FOXP3_TRASDUCED_DN	GSE37534_UNTREATED_VS_GW1929_TREATED_CD4_TCELL_PPARG1_AND_FOXP3_TRASDUCED_DN		174	0.289137	1.20725	0.0964912	0.444705	1	2205	tags=29%, list=19%, signal=36%
GSE17974_IL4_AND_ANTI_IL12_VS_UNTREATED_4H_ACT_CD4_TCELL_DN	GSE17974_IL4_AND_ANTI_IL12_VS_UNTREATED_4H_ACT_CD4_TCELL_DN		75	0.3301	1.20722	0.147368	0.444528	1	882	tags=13%, list=8%, signal=14%
GSE45365_HEALTHY_VS_MCMV_INFECTION_BCELL_IFNAR_KO_UP	GSE45365_HEALTHY_VS_MCMV_INFECTION_BCELL_IFNAR_KO_UP		161	0.295704	1.20721	0.116505	0.444307	1	2289	tags=27%, list=20%, signal=34%
GO_LATERAL_PLASMA_MEMBRANE	GO_LATERAL_PLASMA_MEMBRANE		28	0.403211	1.20716	0.20696	0.444219	1	1171	tags=18%, list=10%, signal=20%
GO_CHROMOSOME_ORGANIZATION_INVOLVED_IN_MEIOTIC_CELL_CYCLE	GO_CHROMOSOME_ORGANIZATION_INVOLVED_IN_MEIOTIC_CELL_CYCLE		26	0.409756	1.20698	0.217617	0.444457	1	1541	tags=27%, list=13%, signal=31%
BONOME_OVARIAN_CANCER_SURVIVAL_SUBOPTIMAL_DEBULKING	BONOME_OVARIAN_CANCER_SURVIVAL_SUBOPTIMAL_DEBULKING		350	0.269228	1.20694	0.0451613	0.444295	1	1820	tags=21%, list=16%, signal=25%
WILCOX_RESPONSE_TO_PROGESTERONE_DN	WILCOX_RESPONSE_TO_PROGESTERONE_DN		29	0.398276	1.2068	0.214829	0.444475	1	1841	tags=31%, list=16%, signal=37%
GSE27786_CD8_TCELL_VS_NEUTROPHIL_DN	GSE27786_CD8_TCELL_VS_NEUTROPHIL_DN		136	0.300171	1.20663	0.116576	0.444688	1	1865	tags=21%, list=16%, signal=25%
GRABARCZYK_BCL11B_TARGETS_DN	GRABARCZYK_BCL11B_TARGETS_DN		37	0.369149	1.20659	0.18618	0.444533	1	1108	tags=22%, list=10%, signal=24%
FAC1_01	FAC1_01		125	0.306177	1.20628	0.122867	0.445161	1	2476	tags=29%, list=21%, signal=36%
SAMOLS_TARGETS_OF_KHSV_MIRNAS_DN	SAMOLS_TARGETS_OF_KHSV_MIRNAS_DN		37	0.380409	1.2062	0.181651	0.445115	1	803	tags=16%, list=7%, signal=17%
YNGTTNNNATT_UNKNOWN	YNGTTNNNATT_UNKNOWN		201	0.287981	1.20589	0.103509	0.445759	1	3093	tags=36%, list=27%, signal=49%
CHR5P15	CHR5P15		38	0.370262	1.20579	0.193078	0.445756	1	1270	tags=21%, list=11%, signal=24%
BIOCARTA_CTCF_PATHWAY	BIOCARTA_CTCF_PATHWAY		18	0.446149	1.20494	0.241697	0.447891	1	2314	tags=33%, list=20%, signal=42%
NIKOLSKY_BREAST_CANCER_20Q12_Q13_AMPLICON	NIKOLSKY_BREAST_CANCER_20Q12_Q13_AMPLICON		78	0.32702	1.20489	0.140071	0.447806	1	1396	tags=21%, list=12%, signal=23%
GO_MICROTUBULE_MOTOR_ACTIVITY	GO_MICROTUBULE_MOTOR_ACTIVITY		41	0.373763	1.20468	0.188192	0.448135	1	2339	tags=37%, list=20%, signal=46%
GSE33425_CD8_ALPHAALPHA_VS_ALPHABETA_CD161_HIGH_TCELL_DN	GSE33425_CD8_ALPHAALPHA_VS_ALPHABETA_CD161_HIGH_TCELL_DN		165	0.291493	1.20431	0.111888	0.448902	1	1890	tags=27%, list=16%, signal=31%
GSE28737_BCL6_HET_VS_BCL6_KO_MARGINAL_ZONE_BCELL_DN	GSE28737_BCL6_HET_VS_BCL6_KO_MARGINAL_ZONE_BCELL_DN		159	0.296066	1.20397	0.106572	0.449622	1	2082	tags=22%, list=18%, signal=26%
SRC_UP.V1_DN	SRC_UP.V1_DN		93	0.311743	1.20351	0.1274	0.450741	1	2407	tags=29%, list=21%, signal=36%
BURTON_ADIPOGENESIS_4	BURTON_ADIPOGENESIS_4		34	0.377985	1.20349	0.198428	0.45053	1	2623	tags=35%, list=23%, signal=45%
GSE28726_NAIVE_VS_ACTIVATED_VA24NEG_NKTCELL_UP	GSE28726_NAIVE_VS_ACTIVATED_VA24NEG_NKTCELL_UP		180	0.290595	1.20337	0.113879	0.450604	1	1164	tags=17%, list=10%, signal=18%
GO_REGULATION_OF_DNA_BIOSYNTHETIC_PROCESS	GO_REGULATION_OF_DNA_BIOSYNTHETIC_PROCESS		69	0.332883	1.20319	0.140594	0.450831	1	1785	tags=33%, list=15%, signal=39%
GO_PROTEIN_COMPLEX_SCAFFOLD	GO_PROTEIN_COMPLEX_SCAFFOLD		42	0.364426	1.20297	0.183556	0.451219	1	2859	tags=38%, list=25%, signal=50%
GSE17721_CTRL_VS_CPG_2H_BMDC_UP	GSE17721_CTRL_VS_CPG_2H_BMDC_UP		163	0.292519	1.20248	0.123711	0.452382	1	2680	tags=29%, list=23%, signal=37%
GSE22886_NEUTROPHIL_VS_DC_DN	GSE22886_NEUTROPHIL_VS_DC_DN		184	0.286155	1.20182	0.0954774	0.453956	1	1730	tags=22%, list=15%, signal=25%
GSE17721_CPG_VS_GARDIQUIMOD_8H_BMDC_UP	GSE17721_CPG_VS_GARDIQUIMOD_8H_BMDC_UP		149	0.294799	1.20166	0.100719	0.454173	1	1726	tags=21%, list=15%, signal=24%
MODULE_16	MODULE_16		367	0.266185	1.20155	0.052459	0.454208	1	1614	tags=21%, list=14%, signal=24%
WANG_RESPONSE_TO_BEXAROTENE_DN	WANG_RESPONSE_TO_BEXAROTENE_DN		18	0.443871	1.20129	0.231776	0.454668	1	241	tags=11%, list=2%, signal=11%
BILD_E2F3_ONCOGENIC_SIGNATURE	BILD_E2F3_ONCOGENIC_SIGNATURE		161	0.291929	1.20111	0.119658	0.454939	1	2475	tags=27%, list=21%, signal=34%
GSE22919_RESTING_VS_IL2_IL12_IL15_STIM_NK_CELL_UP	GSE22919_RESTING_VS_IL2_IL12_IL15_STIM_NK_CELL_UP		174	0.292933	1.20051	0.0974729	0.456381	1	2780	tags=30%, list=24%, signal=39%
MYC_Q2	MYC_Q2		119	0.304188	1.20046	0.133452	0.456238	1	1974	tags=24%, list=17%, signal=28%
GO_REGULATION_OF_TELOMERASE_ACTIVITY	GO_REGULATION_OF_TELOMERASE_ACTIVITY		35	0.376152	1.20042	0.202	0.456111	1	1785	tags=43%, list=15%, signal=51%
MORF_EI24	MORF_EI24		139	0.295668	1.20039	0.115587	0.45593	1	1120	tags=17%, list=10%, signal=18%
GO_PROTEIN_K11_LINKED_UBIQUITINATION	GO_PROTEIN_K11_LINKED_UBIQUITINATION		22	0.419513	1.20013	0.236842	0.456407	1	2335	tags=36%, list=20%, signal=45%
GSE39556_CD8A_DC_VS_NK_CELL_UP	GSE39556_CD8A_DC_VS_NK_CELL_UP		166	0.29121	1.19965	0.0956848	0.457472	1	2455	tags=28%, list=21%, signal=35%
GSE12845_NAIVE_VS_PRE_GC_TONSIL_BCELL_DN	GSE12845_NAIVE_VS_PRE_GC_TONSIL_BCELL_DN		183	0.287919	1.19914	0.0853659	0.458688	1	2694	tags=34%, list=23%, signal=43%
GSE40274_CTRL_VS_FOXP3_AND_PBX1_TRANSDUCED_ACTIVATED_CD4_TCELL_DN	GSE40274_CTRL_VS_FOXP3_AND_PBX1_TRANSDUCED_ACTIVATED_CD4_TCELL_DN		105	0.311524	1.19881	0.133333	0.459363	1	1829	tags=26%, list=16%, signal=30%
MORF_NOS2A	MORF_NOS2A		131	0.297617	1.19851	0.125224	0.459983	1	2646	tags=25%, list=23%, signal=32%
GTTGNYNNRGNAAC_UNKNOWN	GTTGNYNNRGNAAC_UNKNOWN		64	0.339987	1.19845	0.184307	0.459874	1	2078	tags=20%, list=18%, signal=25%
GO_REGULATION_OF_DENDRITIC_SPINE_MORPHOGENESIS	GO_REGULATION_OF_DENDRITIC_SPINE_MORPHOGENESIS		16	0.453885	1.19811	0.223938	0.460619	1	1144	tags=19%, list=10%, signal=21%
GSE20198_UNTREATED_VS_IFNA_TREATED_ACT_CD4_TCELL_DN	GSE20198_UNTREATED_VS_IFNA_TREATED_ACT_CD4_TCELL_DN		164	0.297452	1.19756	0.10772	0.46195	1	1720	tags=19%, list=15%, signal=22%
SANSOM_APC_TARGETS	SANSOM_APC_TARGETS		133	0.301751	1.19749	0.11413	0.461902	1	2819	tags=34%, list=24%, signal=44%
GSE5589_UNSTIM_VS_45MIN_LPS_AND_IL6_STIM_MACROPHAGE_UP	GSE5589_UNSTIM_VS_45MIN_LPS_AND_IL6_STIM_MACROPHAGE_UP		169	0.290438	1.19748	0.103825	0.461672	1	2787	tags=33%, list=24%, signal=42%
GO_RETROGRADE_TRANSPORT_ENDOSOME_TO_GOLGI	GO_RETROGRADE_TRANSPORT_ENDOSOME_TO_GOLGI		57	0.342048	1.1974	0.19666	0.461647	1	2559	tags=35%, list=22%, signal=45%
GO_PROTEIN_LOCALIZATION_TO_CILIUM	GO_PROTEIN_LOCALIZATION_TO_CILIUM		19	0.434326	1.19733	0.2393	0.461569	1	2414	tags=42%, list=21%, signal=53%
GSE19888_ADENOSINE_A3R_INH_PRETREAT_AND_ACT_BY_A3R_VS_TCELL_MEMBRANES_ACT_MAST_CELL_DN	GSE19888_ADENOSINE_A3R_INH_PRETREAT_AND_ACT_BY_A3R_VS_TCELL_MEMBRANES_ACT_MAST_CELL_DN		153	0.293629	1.19711	0.093985	0.461962	1	3019	tags=33%, list=26%, signal=44%
KIM_WT1_TARGETS_DN	KIM_WT1_TARGETS_DN		372	0.267164	1.19695	0.0665529	0.462149	1	2568	tags=29%, list=22%, signal=36%
GSE45365_CD8A_DC_VS_CD11B_DC_IFNAR_KO_DN	GSE45365_CD8A_DC_VS_CD11B_DC_IFNAR_KO_DN		133	0.300287	1.19674	0.131034	0.462472	1	2235	tags=29%, list=19%, signal=36%
GO_MAINTENANCE_OF_CELL_NUMBER	GO_MAINTENANCE_OF_CELL_NUMBER		93	0.315182	1.19665	0.148496	0.462489	1	1693	tags=22%, list=15%, signal=25%
GSE1460_DP_VS_CD4_THYMOCYTE_UP	GSE1460_DP_VS_CD4_THYMOCYTE_UP		150	0.293181	1.19648	0.119929	0.46268	1	2798	tags=35%, list=24%, signal=45%
KIM_HYPOXIA	KIM_HYPOXIA		22	0.435947	1.19635	0.247756	0.462783	1	1410	tags=23%, list=12%, signal=26%
GSE3039_CD4_TCELL_VS_NKT_CELL_UP	GSE3039_CD4_TCELL_VS_NKT_CELL_UP		153	0.292313	1.19604	0.124567	0.463461	1	1196	tags=15%, list=10%, signal=17%
GO_FIBROBLAST_GROWTH_FACTOR_RECEPTOR_SIGNALING_PATHWAY	GO_FIBROBLAST_GROWTH_FACTOR_RECEPTOR_SIGNALING_PATHWAY		57	0.342946	1.19588	0.180657	0.463658	1	1974	tags=25%, list=17%, signal=29%
GO_ATPASE_ACTIVITY	GO_ATPASE_ACTIVITY		315	0.267592	1.19582	0.0829103	0.463567	1	2815	tags=33%, list=24%, signal=42%
CHR13Q14	CHR13Q14		41	0.363544	1.19575	0.198529	0.463504	1	3102	tags=37%, list=27%, signal=50%
CHR1P33	CHR1P33		20	0.429987	1.19564	0.200737	0.46355	1	2033	tags=30%, list=18%, signal=36%
GSE29614_CTRL_VS_DAY7_TIV_FLU_VACCINE_PBMC_DN	GSE29614_CTRL_VS_DAY7_TIV_FLU_VACCINE_PBMC_DN		157	0.294716	1.19563	0.122625	0.463313	1	2190	tags=29%, list=19%, signal=35%
EIF4E_UP	EIF4E_UP		63	0.336295	1.19558	0.172414	0.463194	1	2599	tags=27%, list=22%, signal=35%
GO_GLYCERALDEHYDE_3_PHOSPHATE_METABOLIC_PROCESS	GO_GLYCERALDEHYDE_3_PHOSPHATE_METABOLIC_PROCESS		15	0.467669	1.19557	0.247012	0.462963	1	3302	tags=53%, list=29%, signal=75%
BURTON_ADIPOGENESIS_2	BURTON_ADIPOGENESIS_2		57	0.34157	1.19548	0.184116	0.462959	1	896	tags=18%, list=8%, signal=19%
GO_TUBULIN_BINDING	GO_TUBULIN_BINDING		178	0.288076	1.19537	0.10929	0.463037	1	2165	tags=25%, list=19%, signal=31%
GO_METALLOENDOPEPTIDASE_ACTIVITY	GO_METALLOENDOPEPTIDASE_ACTIVITY		34	0.378509	1.19527	0.203267	0.46307	1	2068	tags=26%, list=18%, signal=32%
MORF_ATRX	MORF_ATRX		157	0.292603	1.19523	0.111498	0.462919	1	2258	tags=29%, list=20%, signal=36%
GSE22432_MULTIPOTENT_PROGENITOR_VS_CDC_DN	GSE22432_MULTIPOTENT_PROGENITOR_VS_CDC_DN		168	0.288943	1.19517	0.123188	0.462829	1	2071	tags=29%, list=18%, signal=34%
GO_HISTONE_MONOUBIQUITINATION	GO_HISTONE_MONOUBIQUITINATION		20	0.436708	1.19514	0.230189	0.462694	1	864	tags=20%, list=7%, signal=22%
GO_POSITIVE_REGULATION_OF_ORGAN_GROWTH	GO_POSITIVE_REGULATION_OF_ORGAN_GROWTH		17	0.4358	1.19477	0.226236	0.463466	1	1884	tags=29%, list=16%, signal=35%
GO_LAMELLIPODIUM_ASSEMBLY	GO_LAMELLIPODIUM_ASSEMBLY		23	0.423634	1.19472	0.224265	0.463387	1	3013	tags=48%, list=26%, signal=65%
GO_CYCLIN_DEPENDENT_PROTEIN_KINASE_ACTIVITY	GO_CYCLIN_DEPENDENT_PROTEIN_KINASE_ACTIVITY		27	0.399892	1.19465	0.21978	0.46331	1	1945	tags=33%, list=17%, signal=40%
GO_ANDROGEN_RECEPTOR_SIGNALING_PATHWAY	GO_ANDROGEN_RECEPTOR_SIGNALING_PATHWAY		35	0.379359	1.19464	0.206522	0.463106	1	3782	tags=49%, list=33%, signal=72%
GO_VITAMIN_D_RECEPTOR_BINDING	GO_VITAMIN_D_RECEPTOR_BINDING		15	0.473015	1.19458	0.230916	0.46301	1	3595	tags=53%, list=31%, signal=77%
ZHANG_RESPONSE_TO_CANTHARIDIN_DN	ZHANG_RESPONSE_TO_CANTHARIDIN_DN		68	0.332678	1.19454	0.153707	0.462873	1	1260	tags=22%, list=11%, signal=25%
SANSOM_APC_TARGETS_REQUIRE_MYC	SANSOM_APC_TARGETS_REQUIRE_MYC		166	0.291633	1.19409	0.100179	0.463866	1	2555	tags=27%, list=22%, signal=34%
PENG_GLUTAMINE_DEPRIVATION_DN	PENG_GLUTAMINE_DEPRIVATION_DN		309	0.269861	1.19405	0.0746528	0.463719	1	2635	tags=25%, list=23%, signal=31%
GSE360_DC_VS_MAC_L_MAJOR_UP	GSE360_DC_VS_MAC_L_MAJOR_UP		129	0.299019	1.19396	0.122523	0.463734	1	1415	tags=16%, list=12%, signal=18%
GSE27291_0H_VS_6H_STIM_GAMMADELTA_TCELL_DN	GSE27291_0H_VS_6H_STIM_GAMMADELTA_TCELL_DN		111	0.306135	1.19393	0.14539	0.463546	1	2863	tags=32%, list=25%, signal=43%
GSE24634_NAIVE_CD4_TCELL_VS_DAY7_IL4_CONV_TREG_DN	GSE24634_NAIVE_CD4_TCELL_VS_DAY7_IL4_CONV_TREG_DN		186	0.283865	1.1939	0.0965517	0.463362	1	1376	tags=18%, list=12%, signal=20%
GSE34006_A2AR_KO_VS_A2AR_AGONIST_TREATED_TREG_DN	GSE34006_A2AR_KO_VS_A2AR_AGONIST_TREATED_TREG_DN		167	0.292216	1.19389	0.108856	0.463135	1	1556	tags=19%, list=13%, signal=21%
GSE37301_RAG2_KO_VS_RAG2_AND_ETS1_KO_NK_CELL_DN	GSE37301_RAG2_KO_VS_RAG2_AND_ETS1_KO_NK_CELL_DN		142	0.297325	1.19387	0.127306	0.462948	1	1054	tags=13%, list=9%, signal=15%
GSE21927_GMCSF_IL6_VS_GMCSF_GCSF_TREATED_BONE_MARROW_DN	GSE21927_GMCSF_IL6_VS_GMCSF_GCSF_TREATED_BONE_MARROW_DN		181	0.284001	1.1937	0.1	0.463153	1	2910	tags=31%, list=25%, signal=41%
GSE36392_TYPE_2_MYELOID_VS_NEUTROPHIL_IL25_TREATED_LUNG_DN	GSE36392_TYPE_2_MYELOID_VS_NEUTROPHIL_IL25_TREATED_LUNG_DN		161	0.292551	1.19323	0.142096	0.464278	1	1693	tags=22%, list=15%, signal=26%
GO_POSITIVE_REGULATION_OF_CYSTEINE_TYPE_ENDOPEPTIDASE_ACTIVITY_INVOLVED_IN_APOPTOTIC_SIGNALING_PATHWAY	GO_POSITIVE_REGULATION_OF_CYSTEINE_TYPE_ENDOPEPTIDASE_ACTIVITY_INVOLVED_IN_APOPTOTIC_SIGNALING_PATHWAY		15	0.456782	1.19316	0.235741	0.464222	1	1568	tags=33%, list=14%, signal=39%
GO_POSITIVE_REGULATION_OF_LIGASE_ACTIVITY	GO_POSITIVE_REGULATION_OF_LIGASE_ACTIVITY		97	0.31179	1.1928	0.157993	0.465006	1	2962	tags=37%, list=26%, signal=49%
GSE18791_CTRL_VS_NEWCASTLE_VIRUS_DC_14H_UP	GSE18791_CTRL_VS_NEWCASTLE_VIRUS_DC_14H_UP		177	0.287881	1.19238	0.0985402	0.46593	1	2525	tags=26%, list=22%, signal=33%
CREIGHTON_ENDOCRINE_THERAPY_RESISTANCE_1	CREIGHTON_ENDOCRINE_THERAPY_RESISTANCE_1		366	0.267787	1.19139	0.0786885	0.468556	1	2454	tags=27%, list=21%, signal=33%
GSE29164_UNTREATED_VS_CD8_TCELL_AND_IL12_TREATED_MELANOMA_DAY3_DN	GSE29164_UNTREATED_VS_CD8_TCELL_AND_IL12_TREATED_MELANOMA_DAY3_DN		166	0.286365	1.19126	0.125912	0.468664	1	2072	tags=23%, list=18%, signal=27%
GSE7509_FCGRIIB_VS_TNFA_IL1B_IL6_PGE_STIM_DC_UP	GSE7509_FCGRIIB_VS_TNFA_IL1B_IL6_PGE_STIM_DC_UP		161	0.2902	1.19105	0.110701	0.469036	1	2602	tags=27%, list=22%, signal=35%
GSE3982_NEUTROPHIL_VS_CENT_MEMORY_CD4_TCELL_DN	GSE3982_NEUTROPHIL_VS_CENT_MEMORY_CD4_TCELL_DN		163	0.288451	1.19074	0.121908	0.469674	1	2598	tags=29%, list=22%, signal=37%
GO_PHOSPHOTRANSFERASE_ACTIVITY_PHOSPHATE_GROUP_AS_ACCEPTOR	GO_PHOSPHOTRANSFERASE_ACTIVITY_PHOSPHATE_GROUP_AS_ACCEPTOR		26	0.400964	1.19069	0.230038	0.469585	1	2455	tags=42%, list=21%, signal=54%
GO_REGULATION_OF_TRANSLATIONAL_INITIATION	GO_REGULATION_OF_TRANSLATIONAL_INITIATION		72	0.331002	1.1906	0.162162	0.469571	1	2859	tags=36%, list=25%, signal=48%
GO_ACTIN_NUCLEATION	GO_ACTIN_NUCLEATION		18	0.439615	1.19051	0.225086	0.469566	1	2890	tags=44%, list=25%, signal=59%
GO_CENTROSOME_DUPLICATION	GO_CENTROSOME_DUPLICATION		27	0.400611	1.19042	0.222635	0.469574	1	3524	tags=48%, list=30%, signal=69%
GSE10147_IL3_AND_HIVP17_VS_IL3_AND_CPG_STIM_PDC_DN	GSE10147_IL3_AND_HIVP17_VS_IL3_AND_CPG_STIM_PDC_DN		111	0.307342	1.19031	0.152542	0.469658	1	1435	tags=20%, list=12%, signal=22%
GSE2405_HEAT_KILLED_LYSATE_VS_LIVE_A_PHAGOCYTOPHILUM_STIM_NEUTROPHIL_9H_DN	GSE2405_HEAT_KILLED_LYSATE_VS_LIVE_A_PHAGOCYTOPHILUM_STIM_NEUTROPHIL_9H_DN		161	0.290298	1.19018	0.106164	0.469784	1	1517	tags=17%, list=13%, signal=20%
SCHLOSSER_MYC_TARGETS_REPRESSED_BY_SERUM	SCHLOSSER_MYC_TARGETS_REPRESSED_BY_SERUM		149	0.292395	1.18954	0.121908	0.47138	1	1997	tags=23%, list=17%, signal=28%
GSE20715_0H_VS_6H_OZONE_LUNG_UP	GSE20715_0H_VS_6H_OZONE_LUNG_UP		141	0.299173	1.18906	0.134126	0.472475	1	1485	tags=21%, list=13%, signal=23%
ANDERSEN_CHOLANGIOCARCINOMA_CLASS2	ANDERSEN_CHOLANGIOCARCINOMA_CLASS2		75	0.330121	1.18896	0.14781	0.472533	1	2300	tags=31%, list=20%, signal=38%
MARKEY_RB1_CHRONIC_LOF_UP	MARKEY_RB1_CHRONIC_LOF_UP		78	0.329643	1.18821	0.177449	0.474448	1	1260	tags=26%, list=11%, signal=29%
CDX2_Q5	CDX2_Q5		128	0.299995	1.18814	0.131868	0.474411	1	1075	tags=13%, list=9%, signal=14%
GSE17974_0H_VS_72H_IN_VITRO_ACT_CD4_TCELL_DN	GSE17974_0H_VS_72H_IN_VITRO_ACT_CD4_TCELL_DN		163	0.289456	1.18806	0.122558	0.474381	1	2069	tags=29%, list=18%, signal=35%
GSE44649_NAIVE_VS_ACTIVATED_CD8_TCELL_DN	GSE44649_NAIVE_VS_ACTIVATED_CD8_TCELL_DN		168	0.287757	1.18778	0.125645	0.474938	1	2580	tags=27%, list=22%, signal=34%
MORF_ARL3	MORF_ARL3		135	0.299377	1.18772	0.143369	0.474861	1	2646	tags=26%, list=23%, signal=33%
GO_RNA_PHOSPHODIESTER_BOND_HYDROLYSIS_EXONUCLEOLYTIC	GO_RNA_PHOSPHODIESTER_BOND_HYDROLYSIS_EXONUCLEOLYTIC		33	0.377209	1.18758	0.221207	0.475019	1	2940	tags=39%, list=25%, signal=53%
MORF_NME2	MORF_NME2		149	0.291989	1.18738	0.129893	0.475334	1	2321	tags=28%, list=20%, signal=34%
P53_DECAMER_Q2	P53_DECAMER_Q2		139	0.298375	1.18737	0.13089	0.475094	1	1472	tags=19%, list=13%, signal=21%
GSE10239_KLRG1INT_VS_KLRG1HIGH_EFF_CD8_TCELL_UP	GSE10239_KLRG1INT_VS_KLRG1HIGH_EFF_CD8_TCELL_UP		141	0.29428	1.18727	0.138434	0.475141	1	2527	tags=32%, list=22%, signal=40%
GSE11864_UNTREATED_VS_CSF1_IFNG_PAM3CYS_IN_MAC_UP	GSE11864_UNTREATED_VS_CSF1_IFNG_PAM3CYS_IN_MAC_UP		146	0.292439	1.18709	0.109489	0.475437	1	2616	tags=30%, list=23%, signal=38%
KCCGNSWTTT_UNKNOWN	KCCGNSWTTT_UNKNOWN		89	0.31543	1.18669	0.154657	0.476337	1	2071	tags=27%, list=18%, signal=33%
GSE2706_UNSTIM_VS_8H_LPS_AND_R848_DC_UP	GSE2706_UNSTIM_VS_8H_LPS_AND_R848_DC_UP		163	0.289798	1.18647	0.118557	0.476713	1	1997	tags=23%, list=17%, signal=27%
GSE9988_ANTI_TREM1_VS_ANTI_TREM1_AND_LPS_MONOCYTE_UP	GSE9988_ANTI_TREM1_VS_ANTI_TREM1_AND_LPS_MONOCYTE_UP		169	0.284969	1.18614	0.12305	0.477493	1	2505	tags=24%, list=22%, signal=31%
GSE30971_CTRL_VS_LPS_STIM_MACROPHAGE_WBP7_HET_4H_DN	GSE30971_CTRL_VS_LPS_STIM_MACROPHAGE_WBP7_HET_4H_DN		159	0.290893	1.18583	0.133681	0.47814	1	2371	tags=26%, list=20%, signal=33%
GSE6259_33D1_POS_DC_VS_BCELL_DN	GSE6259_33D1_POS_DC_VS_BCELL_DN		117	0.301199	1.18577	0.158965	0.478071	1	1569	tags=21%, list=14%, signal=23%
GSE16385_IFNG_TNF_VS_ROSIGLITAZONE_STIM_MACROPHAGE_UP	GSE16385_IFNG_TNF_VS_ROSIGLITAZONE_STIM_MACROPHAGE_UP		114	0.303375	1.18542	0.137566	0.478827	1	2496	tags=32%, list=22%, signal=40%
GSE14699_DELETIONAL_TOLERANCE_VS_ACTIVATED_CD8_TCELL_DN	GSE14699_DELETIONAL_TOLERANCE_VS_ACTIVATED_CD8_TCELL_DN		153	0.294124	1.18526	0.143351	0.479033	1	2880	tags=37%, list=25%, signal=49%
GO_PDZ_DOMAIN_BINDING	GO_PDZ_DOMAIN_BINDING		49	0.349653	1.18526	0.198885	0.478794	1	1858	tags=24%, list=16%, signal=29%
GSE14769_UNSTIM_VS_40MIN_LPS_BMDM_UP	GSE14769_UNSTIM_VS_40MIN_LPS_BMDM_UP		99	0.307491	1.18519	0.175725	0.478711	1	1501	tags=18%, list=13%, signal=21%
GO_NEURON_NEURON_SYNAPTIC_TRANSMISSION	GO_NEURON_NEURON_SYNAPTIC_TRANSMISSION		19	0.432488	1.18515	0.245247	0.478589	1	863	tags=16%, list=7%, signal=17%
GARGALOVIC_RESPONSE_TO_OXIDIZED_PHOSPHOLIPIDS_BLUE_DN	GARGALOVIC_RESPONSE_TO_OXIDIZED_PHOSPHOLIPIDS_BLUE_DN		45	0.356765	1.18492	0.217163	0.478978	1	2073	tags=33%, list=18%, signal=40%
GO_HEART_TRABECULA_MORPHOGENESIS	GO_HEART_TRABECULA_MORPHOGENESIS		15	0.455486	1.1849	0.224014	0.478792	1	932	tags=20%, list=8%, signal=22%
GSE9988_ANTI_TREM1_AND_LPS_VS_CTRL_TREATED_MONOCYTES_DN	GSE9988_ANTI_TREM1_AND_LPS_VS_CTRL_TREATED_MONOCYTES_DN		178	0.287512	1.18474	0.12987	0.478986	1	2913	tags=33%, list=25%, signal=43%
YIH_RESPONSE_TO_ARSENITE_C3	YIH_RESPONSE_TO_ARSENITE_C3		30	0.391763	1.18451	0.22824	0.479376	1	3131	tags=43%, list=27%, signal=59%
GO_PYRIMIDINE_RIBONUCLEOTIDE_METABOLIC_PROCESS	GO_PYRIMIDINE_RIBONUCLEOTIDE_METABOLIC_PROCESS		18	0.443501	1.18445	0.23	0.479267	1	1490	tags=33%, list=13%, signal=38%
GSE7568_IL4_VS_IL4_AND_DEXAMETHASONE_TREATED_MACROPHAGE_DN	GSE7568_IL4_VS_IL4_AND_DEXAMETHASONE_TREATED_MACROPHAGE_DN		102	0.311291	1.18429	0.146296	0.479466	1	1878	tags=23%, list=16%, signal=27%
GSE17721_CTRL_VS_PAM3CSK4_6H_BMDC_DN	GSE17721_CTRL_VS_PAM3CSK4_6H_BMDC_DN		141	0.293127	1.18403	0.123675	0.479958	1	2093	tags=21%, list=18%, signal=26%
GO_NEGATIVE_REGULATION_OF_VASCULATURE_DEVELOPMENT	GO_NEGATIVE_REGULATION_OF_VASCULATURE_DEVELOPMENT		34	0.376161	1.18342	0.232975	0.481477	1	3397	tags=41%, list=29%, signal=58%
GSE35435_RESTING_VS_IL4_TREATED_MACROPHAGE_DN	GSE35435_RESTING_VS_IL4_TREATED_MACROPHAGE_DN		128	0.29776	1.18332	0.14751	0.481484	1	1841	tags=20%, list=16%, signal=23%
GSE17721_CTRL_VS_PAM3CSK4_4H_BMDC_UP	GSE17721_CTRL_VS_PAM3CSK4_4H_BMDC_UP		156	0.287661	1.18316	0.139084	0.481663	1	2889	tags=31%, list=25%, signal=40%
GNF2_DENR	GNF2_DENR		50	0.346187	1.18316	0.192793	0.481414	1	1718	tags=22%, list=15%, signal=26%
GO_MACROMOLECULAR_COMPLEX_DISASSEMBLY	GO_MACROMOLECULAR_COMPLEX_DISASSEMBLY		149	0.293028	1.18314	0.127367	0.481204	1	2836	tags=32%, list=24%, signal=42%
GSE31082_DP_VS_CD8_SP_THYMOCYTE_UP	GSE31082_DP_VS_CD8_SP_THYMOCYTE_UP		166	0.288855	1.18292	0.122523	0.481604	1	2627	tags=28%, list=23%, signal=36%
MORF_DDB1	MORF_DDB1		228	0.275035	1.18277	0.101868	0.481788	1	2523	tags=27%, list=22%, signal=34%
MORF_RAC1	MORF_RAC1		205	0.279233	1.18244	0.118674	0.482489	1	2595	tags=29%, list=22%, signal=37%
GO_CELLULAR_RESPONSE_TO_HEAT	GO_CELLULAR_RESPONSE_TO_HEAT		20	0.424943	1.18226	0.244275	0.482754	1	1552	tags=30%, list=13%, signal=35%
MORF_JAK3	MORF_JAK3		46	0.356474	1.182	0.209346	0.483245	1	975	tags=15%, list=8%, signal=17%
GO_G1_DNA_DAMAGE_CHECKPOINT	GO_G1_DNA_DAMAGE_CHECKPOINT		61	0.337004	1.18124	0.201754	0.4852	1	2598	tags=33%, list=22%, signal=42%
GO_MACROMOLECULE_METHYLATION	GO_MACROMOLECULE_METHYLATION		137	0.295808	1.1811	0.136767	0.485367	1	2546	tags=33%, list=22%, signal=42%
GSE30971_CTRL_VS_LPS_STIM_MACROPHAGE_WBP7_KO_2H_DN	GSE30971_CTRL_VS_LPS_STIM_MACROPHAGE_WBP7_KO_2H_DN		149	0.291675	1.18093	0.128425	0.485585	1	1741	tags=21%, list=15%, signal=24%
GO_SERINE_HYDROLASE_ACTIVITY	GO_SERINE_HYDROLASE_ACTIVITY		64	0.330022	1.18087	0.19209	0.485497	1	1508	tags=22%, list=13%, signal=25%
GSE17974_IL4_AND_ANTI_IL12_VS_UNTREATED_0.5H_ACT_CD4_TCELL_UP	GSE17974_IL4_AND_ANTI_IL12_VS_UNTREATED_0.5H_ACT_CD4_TCELL_UP		115	0.302313	1.18053	0.162304	0.486232	1	1886	tags=23%, list=16%, signal=27%
GO_REGULATION_OF_DOUBLE_STRAND_BREAK_REPAIR	GO_REGULATION_OF_DOUBLE_STRAND_BREAK_REPAIR		29	0.393667	1.1805	0.234962	0.486073	1	3666	tags=38%, list=32%, signal=55%
GSE34392_ST2_KO_VS_WT_DAY8_LCMV_EFFECTOR_CD8_TCELL_UP	GSE34392_ST2_KO_VS_WT_DAY8_LCMV_EFFECTOR_CD8_TCELL_UP		168	0.288756	1.18046	0.130824	0.48592	1	1299	tags=15%, list=11%, signal=17%
GSE3982_MAC_VS_NEUTROPHIL_UP	GSE3982_MAC_VS_NEUTROPHIL_UP		166	0.286146	1.18039	0.131481	0.485865	1	2078	tags=26%, list=18%, signal=31%
GSE13547_WT_VS_ZFX_KO_BCELL_DN	GSE13547_WT_VS_ZFX_KO_BCELL_DN		153	0.291453	1.18034	0.131624	0.48576	1	1784	tags=24%, list=15%, signal=28%
GSE18893_CTRL_VS_TNF_TREATED_TCONV_24H_UP	GSE18893_CTRL_VS_TNF_TREATED_TCONV_24H_UP		160	0.289866	1.18028	0.123023	0.485657	1	2412	tags=28%, list=21%, signal=35%
GSE17301_IFNA2_VS_IFNA5_STIM_ACD3_ACD28_ACT_CD8_TCELL_DN	GSE17301_IFNA2_VS_IFNA5_STIM_ACD3_ACD28_ACT_CD8_TCELL_DN		145	0.287354	1.18024	0.134892	0.485522	1	3310	tags=41%, list=29%, signal=57%
GO_NUCLEAR_MATRIX	GO_NUCLEAR_MATRIX		77	0.317925	1.17995	0.198148	0.486081	1	3117	tags=45%, list=27%, signal=62%
GO_ESTABLISHMENT_OF_LOCALIZATION_BY_MOVEMENT_ALONG_MICROTUBULE	GO_ESTABLISHMENT_OF_LOCALIZATION_BY_MOVEMENT_ALONG_MICROTUBULE		72	0.32831	1.17963	0.199301	0.486764	1	2595	tags=36%, list=22%, signal=46%
BROWNE_HCMV_INFECTION_16HR_DN	BROWNE_HCMV_INFECTION_16HR_DN		50	0.350493	1.17941	0.225045	0.487151	1	2100	tags=30%, list=18%, signal=36%
GSE16450_CTRL_VS_IFNA_12H_STIM_MATURE_NEURON_CELL_LINE_UP	GSE16450_CTRL_VS_IFNA_12H_STIM_MATURE_NEURON_CELL_LINE_UP		85	0.313191	1.17935	0.171986	0.48708	1	1588	tags=18%, list=14%, signal=20%
POU3F2_02	POU3F2_02		131	0.294345	1.17932	0.143911	0.486901	1	1013	tags=16%, list=9%, signal=17%
GSE17721_POLYIC_VS_GARDIQUIMOD_0.5H_BMDC_UP	GSE17721_POLYIC_VS_GARDIQUIMOD_0.5H_BMDC_UP		116	0.300618	1.17923	0.151184	0.48691	1	1710	tags=21%, list=15%, signal=24%
TAYLOR_METHYLATED_IN_ACUTE_LYMPHOBLASTIC_LEUKEMIA	TAYLOR_METHYLATED_IN_ACUTE_LYMPHOBLASTIC_LEUKEMIA		50	0.34677	1.17909	0.201887	0.487065	1	1557	tags=20%, list=13%, signal=23%
GO_NEURAL_TUBE_PATTERNING	GO_NEURAL_TUBE_PATTERNING		15	0.454897	1.17905	0.239777	0.486922	1	2081	tags=40%, list=18%, signal=49%
GSE3720_LPS_VS_PMA_STIM_VD1_GAMMADELTA_TCELL_DN	GSE3720_LPS_VS_PMA_STIM_VD1_GAMMADELTA_TCELL_DN		141	0.292144	1.17904	0.154246	0.486685	1	1598	tags=18%, list=14%, signal=20%
GSE37301_HEMATOPOIETIC_STEM_CELL_VS_COMMON_LYMPHOID_PROGENITOR_DN	GSE37301_HEMATOPOIETIC_STEM_CELL_VS_COMMON_LYMPHOID_PROGENITOR_DN		144	0.292919	1.17824	0.134276	0.488809	1	2324	tags=26%, list=20%, signal=33%
RASHI_RESPONSE_TO_IONIZING_RADIATION_5	RASHI_RESPONSE_TO_IONIZING_RADIATION_5		108	0.301146	1.17793	0.145251	0.489462	1	1997	tags=24%, list=17%, signal=29%
GSE17974_0.5H_VS_72H_UNTREATED_IN_VITRO_CD4_TCELL_DN	GSE17974_0.5H_VS_72H_UNTREATED_IN_VITRO_CD4_TCELL_DN		176	0.285953	1.17782	0.123214	0.489536	1	1569	tags=20%, list=14%, signal=23%
GSE17721_0.5H_VS_8H_POLYIC_BMDC_UP	GSE17721_0.5H_VS_8H_POLYIC_BMDC_UP		155	0.287209	1.17743	0.133913	0.490452	1	1827	tags=21%, list=16%, signal=25%
ROME_INSULIN_TARGETS_IN_MUSCLE_DN	ROME_INSULIN_TARGETS_IN_MUSCLE_DN		108	0.303417	1.17743	0.157221	0.4902	1	1411	tags=20%, list=12%, signal=23%
CHR1Q24	CHR1Q24		27	0.39	1.17733	0.250474	0.49024	1	3042	tags=48%, list=26%, signal=65%
HENDRICKS_SMARCA4_TARGETS_UP	HENDRICKS_SMARCA4_TARGETS_UP		36	0.367782	1.17728	0.229391	0.490145	1	1768	tags=25%, list=15%, signal=29%
NKX61_01	NKX61_01		113	0.300795	1.17702	0.157143	0.49064	1	2078	tags=25%, list=18%, signal=30%
GSE6259_FLT3L_INDUCED_33D1_POS_DC_VS_CD4_TCELL_DN	GSE6259_FLT3L_INDUCED_33D1_POS_DC_VS_CD4_TCELL_DN		139	0.295334	1.17699	0.142615	0.490448	1	2106	tags=25%, list=18%, signal=30%
GSE13411_SWITCHED_MEMORY_BCELL_VS_PLASMA_CELL_DN	GSE13411_SWITCHED_MEMORY_BCELL_VS_PLASMA_CELL_DN		104	0.304128	1.17624	0.153025	0.492455	1	1101	tags=16%, list=10%, signal=18%
EBAUER_MYOGENIC_TARGETS_OF_PAX3_FOXO1_FUSION	EBAUER_MYOGENIC_TARGETS_OF_PAX3_FOXO1_FUSION		25	0.400249	1.17618	0.230912	0.492364	1	1578	tags=28%, list=14%, signal=32%
MORF_RAB3A	MORF_RAB3A		31	0.385428	1.17599	0.250478	0.492678	1	1991	tags=26%, list=17%, signal=31%
RB_P130_DN.V1_UP	RB_P130_DN.V1_UP		76	0.319618	1.17582	0.170412	0.492944	1	2026	tags=34%, list=17%, signal=41%
CHR13Q12	CHR13Q12		50	0.345501	1.17581	0.204842	0.49271	1	2276	tags=26%, list=20%, signal=32%
GSE5589_UNSTIM_VS_45MIN_LPS_AND_IL10_STIM_MACROPHAGE_DN	GSE5589_UNSTIM_VS_45MIN_LPS_AND_IL10_STIM_MACROPHAGE_DN		139	0.294765	1.1755	0.139665	0.493353	1	2295	tags=29%, list=20%, signal=35%
GO_REGULATION_OF_CYSTEINE_TYPE_ENDOPEPTIDASE_ACTIVITY_INVOLVED_IN_APOPTOTIC_SIGNALING_PATHWAY	GO_REGULATION_OF_CYSTEINE_TYPE_ENDOPEPTIDASE_ACTIVITY_INVOLVED_IN_APOPTOTIC_SIGNALING_PATHWAY		19	0.431319	1.17536	0.260073	0.493524	1	1568	tags=32%, list=14%, signal=36%
MODULE_146	MODULE_146		33	0.378373	1.17531	0.233273	0.493396	1	2441	tags=30%, list=21%, signal=38%
GSE16385_ROSIGLITAZONE_IL4_VS_IFNG_TNF_STIM_MACROPHAGE_DN	GSE16385_ROSIGLITAZONE_IL4_VS_IFNG_TNF_STIM_MACROPHAGE_DN		85	0.315524	1.17529	0.186736	0.493218	1	1229	tags=19%, list=11%, signal=21%
GSE17721_CTRL_VS_LPS_8H_BMDC_UP	GSE17721_CTRL_VS_LPS_8H_BMDC_UP		162	0.287602	1.17522	0.123791	0.493163	1	3172	tags=33%, list=27%, signal=45%
GSE17721_POLYIC_VS_PAM3CSK4_6H_BMDC_DN	GSE17721_POLYIC_VS_PAM3CSK4_6H_BMDC_DN		164	0.286977	1.17494	0.116162	0.493738	1	2525	tags=29%, list=22%, signal=37%
GSE11864_UNTREATED_VS_CSF1_IFNG_IN_MAC_DN	GSE11864_UNTREATED_VS_CSF1_IFNG_IN_MAC_DN		161	0.288177	1.17481	0.153979	0.493867	1	2487	tags=29%, list=21%, signal=36%
GSE27786_CD8_TCELL_VS_MONO_MAC_UP	GSE27786_CD8_TCELL_VS_MONO_MAC_UP		159	0.287531	1.17478	0.15035	0.49369	1	2333	tags=29%, list=20%, signal=36%
GO_ER_TO_GOLGI_VESICLE_MEDIATED_TRANSPORT	GO_ER_TO_GOLGI_VESICLE_MEDIATED_TRANSPORT		134	0.296038	1.17472	0.139175	0.493615	1	1628	tags=20%, list=14%, signal=23%
GSE24210_CTRL_VS_IL35_TREATED_TCONV_CD4_TCELL_DN	GSE24210_CTRL_VS_IL35_TREATED_TCONV_CD4_TCELL_DN		181	0.283029	1.17438	0.124352	0.4944	1	2661	tags=29%, list=23%, signal=37%
GARGALOVIC_RESPONSE_TO_OXIDIZED_PHOSPHOLIPIDS_GREEN_DN	GARGALOVIC_RESPONSE_TO_OXIDIZED_PHOSPHOLIPIDS_GREEN_DN		18	0.440177	1.17428	0.238722	0.494445	1	1235	tags=33%, list=11%, signal=37%
MORF_EPHA7	MORF_EPHA7		53	0.337617	1.17426	0.215613	0.494238	1	2814	tags=38%, list=24%, signal=50%
GSE46606_DAY1_VS_DAY3_CD40L_IL2_IL5_STIMULATED_IRF4HIGH_BCELL_UP	GSE46606_DAY1_VS_DAY3_CD40L_IL2_IL5_STIMULATED_IRF4HIGH_BCELL_UP		161	0.286914	1.17411	0.142609	0.494434	1	1701	tags=24%, list=15%, signal=27%
GSE37301_HEMATOPOIETIC_STEM_CELL_VS_RAG2_KO_NK_CELL_UP	GSE37301_HEMATOPOIETIC_STEM_CELL_VS_RAG2_KO_NK_CELL_UP		132	0.294768	1.17367	0.140598	0.495508	1	1407	tags=15%, list=12%, signal=17%
WARTERS_RESPONSE_TO_IR_SKIN	WARTERS_RESPONSE_TO_IR_SKIN		55	0.336557	1.17336	0.203065	0.496179	1	1282	tags=18%, list=11%, signal=20%
LYF1_01	LYF1_01		139	0.290643	1.17329	0.130662	0.496128	1	2596	tags=30%, list=22%, signal=38%
GO_POSITIVE_REGULATION_OF_VIRAL_PROCESS	GO_POSITIVE_REGULATION_OF_VIRAL_PROCESS		78	0.315933	1.17325	0.188065	0.495998	1	1169	tags=17%, list=10%, signal=18%
GSE7764_IL15_NK_CELL_24H_VS_SPLENOCYTE_UP	GSE7764_IL15_NK_CELL_24H_VS_SPLENOCYTE_UP		155	0.289231	1.17319	0.158088	0.495928	1	1749	tags=23%, list=15%, signal=26%
GSE3720_UNSTIM_VS_LPS_STIM_VD1_GAMMADELTA_TCELL_UP	GSE3720_UNSTIM_VS_LPS_STIM_VD1_GAMMADELTA_TCELL_UP		148	0.288025	1.17257	0.141844	0.497507	1	2444	tags=26%, list=21%, signal=32%
GSE3982_NEUTROPHIL_VS_NKCELL_DN	GSE3982_NEUTROPHIL_VS_NKCELL_DN		162	0.28808	1.17223	0.123478	0.498246	1	2560	tags=28%, list=22%, signal=35%
GSE17812_WT_VS_THPOK_KO_MEMORY_CD8_TCELL_DN	GSE17812_WT_VS_THPOK_KO_MEMORY_CD8_TCELL_DN		172	0.281377	1.17223	0.132042	0.498007	1	1991	tags=24%, list=17%, signal=29%
GSE2770_TGFB_AND_IL4_ACT_VS_ACT_CD4_TCELL_2H_UP	GSE2770_TGFB_AND_IL4_ACT_VS_ACT_CD4_TCELL_2H_UP		153	0.288698	1.17165	0.146384	0.49951	1	2499	tags=27%, list=22%, signal=34%
ACAWYAAAG_UNKNOWN	ACAWYAAAG_UNKNOWN		54	0.339394	1.17155	0.209591	0.499567	1	1266	tags=19%, list=11%, signal=21%
GO_GMP_METABOLIC_PROCESS	GO_GMP_METABOLIC_PROCESS		15	0.463892	1.17143	0.259813	0.499672	1	1382	tags=33%, list=12%, signal=38%
GSE17721_CTRL_VS_POLYIC_8H_BMDC_UP	GSE17721_CTRL_VS_POLYIC_8H_BMDC_UP		165	0.285207	1.1714	0.143363	0.499485	1	2441	tags=27%, list=21%, signal=34%
GO_HISTONE_H3_ACETYLATION	GO_HISTONE_H3_ACETYLATION		35	0.369552	1.1714	0.219601	0.499225	1	1971	tags=26%, list=17%, signal=31%
YAMAZAKI_TCEB3_TARGETS_DN	YAMAZAKI_TCEB3_TARGETS_DN		160	0.286127	1.17128	0.137184	0.499355	1	2574	tags=31%, list=22%, signal=40%
ACACTCC_MIR122A	ACACTCC_MIR122A		52	0.341578	1.17128	0.216607	0.499102	1	3247	tags=37%, list=28%, signal=51%
LIANG_HEMATOPOIESIS_STEM_CELL_NUMBER_SMALL_VS_HUGE_UP	LIANG_HEMATOPOIESIS_STEM_CELL_NUMBER_SMALL_VS_HUGE_UP		30	0.381966	1.17123	0.245045	0.498983	1	1427	tags=20%, list=12%, signal=23%
IZADPANAH_STEM_CELL_ADIPOSE_VS_BONE_DN	IZADPANAH_STEM_CELL_ADIPOSE_VS_BONE_DN		51	0.341847	1.1712	0.224299	0.49881	1	2551	tags=31%, list=22%, signal=40%
GO_SOLUTE_CATION_SYMPORTER_ACTIVITY	GO_SOLUTE_CATION_SYMPORTER_ACTIVITY		38	0.366535	1.17116	0.247148	0.498674	1	762	tags=18%, list=7%, signal=20%
GSE25085_FETAL_LIVER_VS_FETAL_BM_SP4_THYMIC_IMPLANT_UP	GSE25085_FETAL_LIVER_VS_FETAL_BM_SP4_THYMIC_IMPLANT_UP		164	0.286601	1.17114	0.150183	0.498466	1	2116	tags=24%, list=18%, signal=29%
BROWNE_HCMV_INFECTION_10HR_DN	BROWNE_HCMV_INFECTION_10HR_DN		40	0.361819	1.17107	0.252205	0.498425	1	3063	tags=45%, list=26%, signal=61%
KRAS.KIDNEY_UP.V1_UP	KRAS.KIDNEY_UP.V1_UP		50	0.345532	1.17104	0.217069	0.49824	1	2087	tags=28%, list=18%, signal=34%
GSE25087_FETAL_VS_ADULT_TREG_UP	GSE25087_FETAL_VS_ADULT_TREG_UP		169	0.28336	1.17052	0.132302	0.499563	1	1950	tags=21%, list=17%, signal=25%
GO_REGULATION_OF_DNA_METABOLIC_PROCESS	GO_REGULATION_OF_DNA_METABOLIC_PROCESS		248	0.270348	1.16963	0.121667	0.501943	1	1785	tags=23%, list=15%, signal=26%
P53_02	P53_02		143	0.289275	1.16934	0.166667	0.502542	1	1480	tags=20%, list=13%, signal=23%
ALPHACP1_01	ALPHACP1_01		161	0.284428	1.16916	0.143113	0.502822	1	2449	tags=29%, list=21%, signal=36%
GSE41176_WT_VS_TAK1_KO_ANTI_IGM_STIM_BCELL_24H_DN	GSE41176_WT_VS_TAK1_KO_ANTI_IGM_STIM_BCELL_24H_DN		172	0.279577	1.16895	0.127119	0.503223	1	1611	tags=17%, list=14%, signal=20%
BROWNE_HCMV_INFECTION_6HR_DN	BROWNE_HCMV_INFECTION_6HR_DN		116	0.296894	1.16867	0.174632	0.503796	1	1568	tags=18%, list=14%, signal=21%
GCM_NF2	GCM_NF2		262	0.269539	1.16823	0.120954	0.504889	1	2256	tags=22%, list=19%, signal=27%
GSE3982_CTRL_VS_LPS_48H_DC_UP	GSE3982_CTRL_VS_LPS_48H_DC_UP		133	0.289245	1.16807	0.161871	0.505097	1	2014	tags=23%, list=17%, signal=27%
SNACANNNYSYAGA_UNKNOWN	SNACANNNYSYAGA_UNKNOWN		68	0.320074	1.16793	0.19337	0.505267	1	1960	tags=22%, list=17%, signal=26%
GSE21927_SPLENIC_VS_TUMOR_MONOCYTES_FROM_C26GM_TUMOROUS_MICE_BALBC_DN	GSE21927_SPLENIC_VS_TUMOR_MONOCYTES_FROM_C26GM_TUMOROUS_MICE_BALBC_DN		171	0.284483	1.16739	0.145161	0.506636	1	1102	tags=12%, list=10%, signal=13%
GO_NEGATIVE_REGULATION_OF_MYELOID_CELL_DIFFERENTIATION	GO_NEGATIVE_REGULATION_OF_MYELOID_CELL_DIFFERENTIATION		55	0.339909	1.16735	0.209854	0.506517	1	1376	tags=22%, list=12%, signal=25%
GSE17721_LPS_VS_POLYIC_0.5H_BMDC_UP	GSE17721_LPS_VS_POLYIC_0.5H_BMDC_UP		137	0.286575	1.16719	0.163993	0.506742	1	2800	tags=33%, list=24%, signal=43%
GSE19401_RETINOIC_ACID_VS_RETINOIC_ACID_AND_PAM2CSK4_STIM_FOLLICULAR_DC_DN	GSE19401_RETINOIC_ACID_VS_RETINOIC_ACID_AND_PAM2CSK4_STIM_FOLLICULAR_DC_DN		145	0.289241	1.16685	0.146959	0.507537	1	3027	tags=37%, list=26%, signal=49%
GO_PEPTIDYL_LYSINE_TRIMETHYLATION	GO_PEPTIDYL_LYSINE_TRIMETHYLATION		16	0.447731	1.16659	0.251812	0.508058	1	634	tags=19%, list=5%, signal=20%
LABBE_WNT3A_TARGETS_DN	LABBE_WNT3A_TARGETS_DN		56	0.339335	1.16604	0.215074	0.50952	1	1312	tags=16%, list=11%, signal=18%
GSE14308_TH1_VS_TH17_UP	GSE14308_TH1_VS_TH17_UP		155	0.28491	1.16562	0.145329	0.510544	1	1858	tags=26%, list=16%, signal=30%
GO_SMALL_NUCLEOLAR_RIBONUCLEOPROTEIN_COMPLEX	GO_SMALL_NUCLEOLAR_RIBONUCLEOPROTEIN_COMPLEX		17	0.440596	1.16514	0.26729	0.511773	1	2412	tags=35%, list=21%, signal=45%
GSE35543_IN_VIVO_NTREG_VS_CONVERTED_EX_ITREG_UP	GSE35543_IN_VIVO_NTREG_VS_CONVERTED_EX_ITREG_UP		113	0.301244	1.16512	0.156357	0.511564	1	3064	tags=35%, list=26%, signal=46%
CHIANG_LIVER_CANCER_SUBCLASS_CTNNB1_UP	CHIANG_LIVER_CANCER_SUBCLASS_CTNNB1_UP		80	0.312943	1.16503	0.179439	0.511599	1	2950	tags=34%, list=25%, signal=45%
PLASARI_TGFB1_TARGETS_10HR_DN	PLASARI_TGFB1_TARGETS_10HR_DN		137	0.291034	1.16499	0.151304	0.511445	1	1827	tags=23%, list=16%, signal=27%
GSE6674_ANTI_IGM_VS_ANTI_IGM_AND_CPG_STIM_BCELL_UP	GSE6674_ANTI_IGM_VS_ANTI_IGM_AND_CPG_STIM_BCELL_UP		158	0.285961	1.16495	0.141361	0.511309	1	2587	tags=29%, list=22%, signal=37%
REACTOME_MUSCLE_CONTRACTION	REACTOME_MUSCLE_CONTRACTION		27	0.390732	1.1647	0.253704	0.511787	1	3163	tags=44%, list=27%, signal=61%
GO_PROTEIN_ALKYLATION	GO_PROTEIN_ALKYLATION		75	0.315652	1.16446	0.184448	0.51225	1	2542	tags=35%, list=22%, signal=44%
GSE17721_POLYIC_VS_PAM3CSK4_1H_BMDC_UP	GSE17721_POLYIC_VS_PAM3CSK4_1H_BMDC_UP		171	0.280065	1.1644	0.117747	0.512198	1	2996	tags=34%, list=26%, signal=45%
GSE32986_UNSTIM_VS_GMCSF_AND_CURDLAN_LOWDOSE_STIM_DC_UP	GSE32986_UNSTIM_VS_GMCSF_AND_CURDLAN_LOWDOSE_STIM_DC_UP		181	0.278569	1.16417	0.144366	0.512629	1	1420	tags=17%, list=12%, signal=19%
RIGGI_EWING_SARCOMA_PROGENITOR_DN	RIGGI_EWING_SARCOMA_PROGENITOR_DN		82	0.314469	1.16405	0.190826	0.512745	1	1263	tags=23%, list=11%, signal=26%
GSE23925_LIGHT_ZONE_VS_DARK_ZONE_BCELL_UP	GSE23925_LIGHT_ZONE_VS_DARK_ZONE_BCELL_UP		108	0.303113	1.16395	0.172352	0.512766	1	2956	tags=30%, list=26%, signal=39%
SHIPP_DLBCL_VS_FOLLICULAR_LYMPHOMA_DN	SHIPP_DLBCL_VS_FOLLICULAR_LYMPHOMA_DN		29	0.38565	1.16392	0.259048	0.512601	1	1065	tags=21%, list=9%, signal=23%
GSE6674_CPG_VS_CPG_AND_ANTI_IGM_STIM_BCELL_UP	GSE6674_CPG_VS_CPG_AND_ANTI_IGM_STIM_BCELL_UP		170	0.281844	1.16385	0.14539	0.512546	1	2648	tags=35%, list=23%, signal=45%
GO_PHOSPHATASE_REGULATOR_ACTIVITY	GO_PHOSPHATASE_REGULATOR_ACTIVITY		59	0.339426	1.16385	0.215356	0.512292	1	1333	tags=19%, list=12%, signal=21%
GO_NEGATIVE_REGULATION_OF_RESPONSE_TO_CYTOKINE_STIMULUS	GO_NEGATIVE_REGULATION_OF_RESPONSE_TO_CYTOKINE_STIMULUS		28	0.398449	1.16379	0.254335	0.512203	1	1716	tags=29%, list=15%, signal=33%
GSE3982_CTRL_VS_LPS_1H_NEUTROPHIL_UP	GSE3982_CTRL_VS_LPS_1H_NEUTROPHIL_UP		139	0.293316	1.16362	0.176471	0.51245	1	1962	tags=21%, list=17%, signal=25%
GSE31082_CD4_VS_CD8_SP_THYMOCYTE_DN	GSE31082_CD4_VS_CD8_SP_THYMOCYTE_DN		153	0.285041	1.16359	0.143599	0.512287	1	2533	tags=35%, list=22%, signal=44%
GO_CARDIAC_CHAMBER_MORPHOGENESIS	GO_CARDIAC_CHAMBER_MORPHOGENESIS		48	0.344557	1.16352	0.213504	0.512247	1	932	tags=15%, list=8%, signal=16%
CHR7P22	CHR7P22		42	0.355446	1.16318	0.239437	0.513015	1	1212	tags=17%, list=10%, signal=19%
BROWNE_HCMV_INFECTION_30MIN_DN	BROWNE_HCMV_INFECTION_30MIN_DN		87	0.311481	1.16268	0.19863	0.514309	1	1769	tags=21%, list=15%, signal=24%
MODULE_110	MODULE_110		15	0.467145	1.16263	0.273063	0.514199	1	3266	tags=40%, list=28%, signal=56%
GNF2_TDG	GNF2_TDG		35	0.364987	1.16246	0.231203	0.514455	1	1984	tags=34%, list=17%, signal=41%
GO_UBIQUITIN_LIGASE_COMPLEX	GO_UBIQUITIN_LIGASE_COMPLEX		204	0.274783	1.16245	0.130952	0.51421	1	3002	tags=34%, list=26%, signal=45%
GSE36476_YOUNG_VS_OLD_DONOR_MEMORY_CD4_TCELL_UP	GSE36476_YOUNG_VS_OLD_DONOR_MEMORY_CD4_TCELL_UP		127	0.291662	1.16244	0.171577	0.513972	1	1653	tags=20%, list=14%, signal=24%
GSE20715_0H_VS_48H_OZONE_LUNG_DN	GSE20715_0H_VS_48H_OZONE_LUNG_DN		157	0.287637	1.16222	0.184669	0.514396	1	2035	tags=27%, list=18%, signal=32%
GSE41867_NAIVE_VS_DAY6_LCMV_ARMSTRONG_EFFECTOR_CD8_TCELL_UP	GSE41867_NAIVE_VS_DAY6_LCMV_ARMSTRONG_EFFECTOR_CD8_TCELL_UP		150	0.285696	1.16183	0.156794	0.51533	1	2485	tags=25%, list=21%, signal=31%
GSE38681_WT_VS_LYL1_KO_LYMPHOID_PRIMED_MULTIPOTENT_PROGENITOR_UP	GSE38681_WT_VS_LYL1_KO_LYMPHOID_PRIMED_MULTIPOTENT_PROGENITOR_UP		150	0.284983	1.16158	0.15807	0.515837	1	3064	tags=35%, list=26%, signal=47%
BEIER_GLIOMA_STEM_CELL_UP	BEIER_GLIOMA_STEM_CELL_UP		16	0.45224	1.16155	0.272727	0.515696	1	1100	tags=25%, list=9%, signal=28%
GSE17721_LPS_VS_GARDIQUIMOD_16H_BMDC_DN	GSE17721_LPS_VS_GARDIQUIMOD_16H_BMDC_DN		153	0.284849	1.16143	0.147748	0.51578	1	1268	tags=17%, list=11%, signal=19%
CHR3Q27	CHR3Q27		34	0.368352	1.1611	0.229779	0.516534	1	999	tags=21%, list=9%, signal=22%
GSE14769_UNSTIM_VS_60MIN_LPS_BMDM_UP	GSE14769_UNSTIM_VS_60MIN_LPS_BMDM_UP		156	0.285618	1.16075	0.154399	0.517374	1	1531	tags=17%, list=13%, signal=19%
GO_PHOSPHATIDYLINOSITOL_DEPHOSPHORYLATION	GO_PHOSPHATIDYLINOSITOL_DEPHOSPHORYLATION		17	0.442808	1.16057	0.25	0.517632	1	1835	tags=24%, list=16%, signal=28%
GSE10325_LUPUS_CD4_TCELL_VS_LUPUS_MYELOID_UP	GSE10325_LUPUS_CD4_TCELL_VS_LUPUS_MYELOID_UP		163	0.284053	1.16053	0.172232	0.517474	1	2861	tags=29%, list=25%, signal=38%
GSE13485_DAY1_VS_DAY3_YF17D_VACCINE_PBMC_UP	GSE13485_DAY1_VS_DAY3_YF17D_VACCINE_PBMC_UP		33	0.372239	1.16053	0.256654	0.517222	1	3211	tags=42%, list=28%, signal=59%
GSE26351_UNSTIM_VS_BMP_PATHWAY_STIM_HEMATOPOIETIC_PROGENITORS_UP	GSE26351_UNSTIM_VS_BMP_PATHWAY_STIM_HEMATOPOIETIC_PROGENITORS_UP		162	0.285828	1.16049	0.143898	0.517076	1	1972	tags=25%, list=17%, signal=29%
GSE9601_UNTREATED_VS_PI3K_INHIBITOR_TREATED_HCMV_INF_MONOCYTE_UP	GSE9601_UNTREATED_VS_PI3K_INHIBITOR_TREATED_HCMV_INF_MONOCYTE_UP		150	0.285794	1.16035	0.149826	0.51725	1	2658	tags=29%, list=23%, signal=38%
GSE23308_WT_VS_MINERALCORTICOID_REC_KO_MACROPHAGE_UP	GSE23308_WT_VS_MINERALCORTICOID_REC_KO_MACROPHAGE_UP		170	0.280211	1.16027	0.155172	0.517224	1	3061	tags=32%, list=26%, signal=43%
GSE360_L_MAJOR_VS_M_TUBERCULOSIS_MAC_UP	GSE360_L_MAJOR_VS_M_TUBERCULOSIS_MAC_UP		110	0.300154	1.16008	0.178967	0.517559	1	1873	tags=21%, list=16%, signal=25%
GNF2_LCAT	GNF2_LCAT		32	0.377769	1.16002	0.262452	0.517487	1	2689	tags=41%, list=23%, signal=53%
GSE36009_UNSTIM_VS_LPS_STIM_NLRP10_KO_DC_DN	GSE36009_UNSTIM_VS_LPS_STIM_NLRP10_KO_DC_DN		161	0.284931	1.15959	0.165794	0.518552	1	2271	tags=27%, list=20%, signal=34%
GSE17721_CTRL_VS_POLYIC_6H_BMDC_UP	GSE17721_CTRL_VS_POLYIC_6H_BMDC_UP		160	0.282087	1.15926	0.144828	0.519269	1	2917	tags=32%, list=25%, signal=42%
GO_H4_HISTONE_ACETYLTRANSFERASE_COMPLEX	GO_H4_HISTONE_ACETYLTRANSFERASE_COMPLEX		16	0.433448	1.15923	0.25603	0.519108	1	2696	tags=50%, list=23%, signal=65%
ANDERSEN_CHOLANGIOCARCINOMA_CLASS1	ANDERSEN_CHOLANGIOCARCINOMA_CLASS1		25	0.393262	1.15919	0.255198	0.518961	1	139	tags=12%, list=1%, signal=12%
GO_NUCLEOBASE_CONTAINING_COMPOUND_KINASE_ACTIVITY	GO_NUCLEOBASE_CONTAINING_COMPOUND_KINASE_ACTIVITY		34	0.365783	1.15905	0.235955	0.519156	1	1827	tags=32%, list=16%, signal=38%
GSE34156_UNTREATED_VS_24H_NOD2_AND_TLR1_TLR2_LIGAND_TREATED_MONOCYTE_DN	GSE34156_UNTREATED_VS_24H_NOD2_AND_TLR1_TLR2_LIGAND_TREATED_MONOCYTE_DN		55	0.32919	1.1588	0.199282	0.519623	1	968	tags=16%, list=8%, signal=18%
JAZAG_TGFB1_SIGNALING_UP	JAZAG_TGFB1_SIGNALING_UP		66	0.32829	1.15873	0.229682	0.519579	1	1400	tags=20%, list=12%, signal=22%
GSE3982_MAST_CELL_VS_NEUTROPHIL_UP	GSE3982_MAST_CELL_VS_NEUTROPHIL_UP		176	0.276016	1.15769	0.143617	0.522558	1	1851	tags=21%, list=16%, signal=25%
VARELA_ZMPSTE24_TARGETS_UP	VARELA_ZMPSTE24_TARGETS_UP		32	0.375598	1.15767	0.239089	0.522372	1	882	tags=13%, list=8%, signal=13%
MORF_RAF1	MORF_RAF1		106	0.301006	1.15754	0.184448	0.522509	1	2360	tags=28%, list=20%, signal=35%
AGTTCTC_MIR146A_MIR146B	AGTTCTC_MIR146A_MIR146B		34	0.369533	1.15753	0.226937	0.522296	1	3059	tags=44%, list=26%, signal=60%
REACTOME_SYNTHESIS_AND_INTERCONVERSION_OF_NUCLEOTIDE_DI_AND_TRIPHOSPHATES	REACTOME_SYNTHESIS_AND_INTERCONVERSION_OF_NUCLEOTIDE_DI_AND_TRIPHOSPHATES		16	0.436437	1.15749	0.26506	0.522151	1	1052	tags=31%, list=9%, signal=34%
RORA2_01	RORA2_01		74	0.315684	1.15746	0.205992	0.522001	1	1187	tags=16%, list=10%, signal=18%
MAZ_Q6	MAZ_Q6		122	0.291657	1.15743	0.184669	0.521829	1	2105	tags=23%, list=18%, signal=28%
CHR16P12	CHR16P12		53	0.339756	1.15702	0.250467	0.522856	1	1142	tags=15%, list=10%, signal=17%
GSE21379_TFH_VS_NON_TFH_SAP_KO_CD4_TCELL_UP	GSE21379_TFH_VS_NON_TFH_SAP_KO_CD4_TCELL_UP		149	0.28682	1.15682	0.159052	0.523221	1	2374	tags=26%, list=21%, signal=33%
GSE25123_ROSIGLITAZONE_VS_IL4_AND_ROSIGLITAZONE_STIM_PPARG_KO_MACROPHAGE_DAY10_UP	GSE25123_ROSIGLITAZONE_VS_IL4_AND_ROSIGLITAZONE_STIM_PPARG_KO_MACROPHAGE_DAY10_UP		151	0.287689	1.15602	0.157009	0.525446	1	2033	tags=23%, list=18%, signal=28%
GO_PANCREAS_DEVELOPMENT	GO_PANCREAS_DEVELOPMENT		30	0.378413	1.15565	0.253308	0.526358	1	358	tags=17%, list=3%, signal=17%
[truncated: 3,241 more rows]
