# Supplementary material for: Integration of genomics and transcriptomics predicts diabetic retinopathy susceptibility genes
Source: eLife. 2020 Nov 9;9:e59980. doi: 10.7554/eLife.59980 (PMC7728435; doi:10.7554/eLife.59980)
Supplement: Figure 1—source data 3. [file elife-59980-fig1-data3.xlsx]

## Sheet: gsea_report_for_na_neg_15005678
NAME	GS<br> follow link to MSigDB	GS DETAILS	SIZE	ES	NES	NOM p-val	FDR q-val	FWER p-val	RANK AT MAX	LEADING EDGE
GO_RESPONSE_TO_TYPE_I_INTERFERON	GO_RESPONSE_TO_TYPE_I_INTERFERON	Details ...	52	-0.752157	-2.53315	0	0	0	1427	tags=54%, list=12%, signal=61%
GO_RESPONSE_TO_INTERFERON_GAMMA	GO_RESPONSE_TO_INTERFERON_GAMMA	Details ...	101	-0.637041	-2.42047	0	0	0	1819	tags=45%, list=16%, signal=52%
GO_CELLULAR_RESPONSE_TO_INTERFERON_GAMMA	GO_CELLULAR_RESPONSE_TO_INTERFERON_GAMMA	Details ...	85	-0.657189	-2.40215	0	0	0	1216	tags=38%, list=11%, signal=42%
GO_GRANULOCYTE_MIGRATION	GO_GRANULOCYTE_MIGRATION	Details ...	43	-0.73321	-2.39898	0	0	0	491	tags=28%, list=4%, signal=29%
GO_INTERFERON_GAMMA_MEDIATED_SIGNALING_PATHWAY	GO_INTERFERON_GAMMA_MEDIATED_SIGNALING_PATHWAY	Details ...	57	-0.669925	-2.34081	0	0	0	1491	tags=42%, list=13%, signal=48%
GO_CYTOKINE_ACTIVITY	GO_CYTOKINE_ACTIVITY	Details ...	80	-0.625481	-2.31727	0	0	0	1613	tags=44%, list=14%, signal=50%
GO_LEUKOCYTE_CHEMOTAXIS	GO_LEUKOCYTE_CHEMOTAXIS	Details ...	67	-0.644153	-2.27464	0	0	0	1229	tags=34%, list=11%, signal=38%
GO_MONOCYTE_CHEMOTAXIS	GO_MONOCYTE_CHEMOTAXIS	Details ...	22	-0.801947	-2.26448	0	0	0	530	tags=36%, list=5%, signal=38%
GO_MYELOID_LEUKOCYTE_MIGRATION	GO_MYELOID_LEUKOCYTE_MIGRATION	Details ...	55	-0.666598	-2.25727	0	0.000147589	0.001	1792	tags=38%, list=15%, signal=45%
GO_CCR_CHEMOKINE_RECEPTOR_BINDING	GO_CCR_CHEMOKINE_RECEPTOR_BINDING	Details ...	18	-0.841181	-2.22477	0	0.000262683	0.002	491	tags=39%, list=4%, signal=41%
GO_POSITIVE_REGULATION_OF_RESPONSE_TO_WOUNDING	GO_POSITIVE_REGULATION_OF_RESPONSE_TO_WOUNDING	Details ...	86	-0.599632	-2.22208	0	0.000238803	0.002	1546	tags=34%, list=13%, signal=39%
GO_POSITIVE_REGULATION_OF_INTERLEUKIN_8_PRODUCTION	GO_POSITIVE_REGULATION_OF_INTERLEUKIN_8_PRODUCTION	Details ...	29	-0.755431	-2.22012	0	0.000218902	0.002	1349	tags=45%, list=12%, signal=51%
GO_CELLULAR_RESPONSE_TO_INTERLEUKIN_1	GO_CELLULAR_RESPONSE_TO_INTERLEUKIN_1	Details ...	52	-0.654824	-2.21725	0	0.000202064	0.002	530	tags=25%, list=5%, signal=26%
GO_POSITIVE_REGULATION_OF_INFLAMMATORY_RESPONSE	GO_POSITIVE_REGULATION_OF_INFLAMMATORY_RESPONSE	Details ...	62	-0.63539	-2.20922	0	0.000281884	0.003	853	tags=29%, list=7%, signal=31%
GO_SMOOTH_ENDOPLASMIC_RETICULUM	GO_SMOOTH_ENDOPLASMIC_RETICULUM	Details ...	21	-0.796614	-2.20739	0	0.000263092	0.003	684	tags=43%, list=6%, signal=45%
GO_CELL_CHEMOTAXIS	GO_CELL_CHEMOTAXIS	Details ...	88	-0.595899	-2.20291	0	0.000246648	0.003	1815	tags=39%, list=16%, signal=45%
GO_CYTOKINE_MEDIATED_SIGNALING_PATHWAY	GO_CYTOKINE_MEDIATED_SIGNALING_PATHWAY	Details ...	292	-0.506986	-2.19947	0	0.00023214	0.003	1850	tags=33%, list=16%, signal=38%
GO_GLYCOPROTEIN_BINDING	GO_GLYCOPROTEIN_BINDING	Details ...	61	-0.62378	-2.19376	0	0.000219243	0.003	1438	tags=39%, list=12%, signal=45%
GO_CYTOSOLIC_CALCIUM_ION_TRANSPORT	GO_CYTOSOLIC_CALCIUM_ION_TRANSPORT	Details ...	33	-0.704479	-2.18984	0	0.000207704	0.003	1141	tags=36%, list=10%, signal=40%
GO_CHEMOKINE_MEDIATED_SIGNALING_PATHWAY	GO_CHEMOKINE_MEDIATED_SIGNALING_PATHWAY	Details ...	29	-0.703703	-2.18526	0	0.000197319	0.003	1822	tags=48%, list=16%, signal=57%
GO_LEUKOCYTE_MIGRATION	GO_LEUKOCYTE_MIGRATION		154	-0.538739	-2.17143	0	0.000249757	0.004	1901	tags=35%, list=16%, signal=41%
GO_CYTOKINE_RECEPTOR_BINDING	GO_CYTOKINE_RECEPTOR_BINDING		135	-0.545451	-2.15973	0	0.000297991	0.005	1613	tags=32%, list=14%, signal=37%
GO_POSITIVE_REGULATION_OF_CYTOKINE_BIOSYNTHETIC_PROCESS	GO_POSITIVE_REGULATION_OF_CYTOKINE_BIOSYNTHETIC_PROCESS		37	-0.683141	-2.14597	0	0.000458015	0.008	908	tags=30%, list=8%, signal=32%
GO_REGULATION_OF_INTERLEUKIN_8_PRODUCTION	GO_REGULATION_OF_INTERLEUKIN_8_PRODUCTION		38	-0.678746	-2.12749	0	0.000711833	0.013	1349	tags=42%, list=12%, signal=48%
GO_POSITIVE_REGULATION_OF_LIPID_METABOLIC_PROCESS	GO_POSITIVE_REGULATION_OF_LIPID_METABOLIC_PROCESS		75	-0.591617	-2.1263	0	0.00068336	0.013	1235	tags=31%, list=11%, signal=34%
GO_RESPONSE_TO_INTERLEUKIN_1	GO_RESPONSE_TO_INTERLEUKIN_1		71	-0.597481	-2.12057	0	0.000708445	0.014	530	tags=23%, list=5%, signal=23%
GO_REGULATION_OF_CYTOKINE_SECRETION	GO_REGULATION_OF_CYTOKINE_SECRETION		94	-0.570568	-2.11792	0	0.000780751	0.015	2425	tags=51%, list=21%, signal=64%
GO_REGULATION_OF_CYTOKINE_BIOSYNTHETIC_PROCESS	GO_REGULATION_OF_CYTOKINE_BIOSYNTHETIC_PROCESS		61	-0.590193	-2.1099	0	0.000801211	0.016	908	tags=26%, list=8%, signal=28%
GO_REGULATION_OF_T_CELL_PROLIFERATION	GO_REGULATION_OF_T_CELL_PROLIFERATION		108	-0.546516	-2.09696	0	0.000909386	0.019	1887	tags=34%, list=16%, signal=41%
GO_POSITIVE_REGULATION_OF_ERK1_AND_ERK2_CASCADE	GO_POSITIVE_REGULATION_OF_ERK1_AND_ERK2_CASCADE		92	-0.549655	-2.09082	0	0.00101437	0.021	2136	tags=47%, list=18%, signal=57%
GO_CELLULAR_RESPONSE_TO_TOPOLOGICALLY_INCORRECT_PROTEIN	GO_CELLULAR_RESPONSE_TO_TOPOLOGICALLY_INCORRECT_PROTEIN		103	-0.547866	-2.08162	0	0.0012351	0.027	1836	tags=37%, list=16%, signal=43%
GO_POSITIVE_REGULATION_OF_LYMPHOCYTE_DIFFERENTIATION	GO_POSITIVE_REGULATION_OF_LYMPHOCYTE_DIFFERENTIATION		55	-0.59731	-2.07404	0	0.00140343	0.032	1017	tags=35%, list=9%, signal=38%
GO_RESPONSE_TO_CYTOKINE	GO_RESPONSE_TO_CYTOKINE		473	-0.457535	-2.0718	0	0.00164177	0.039	1824	tags=30%, list=16%, signal=34%
GO_REGULATION_OF_ENDOPLASMIC_RETICULUM_STRESS_INDUCED_INTRINSIC_APOPTOTIC_SIGNALING_PATHWAY	GO_REGULATION_OF_ENDOPLASMIC_RETICULUM_STRESS_INDUCED_INTRINSIC_APOPTOTIC_SIGNALING_PATHWAY		26	-0.717727	-2.06451	0	0.00201972	0.05	552	tags=35%, list=5%, signal=36%
GO_POSITIVE_REGULATION_OF_LEUKOCYTE_MEDIATED_IMMUNITY	GO_POSITIVE_REGULATION_OF_LEUKOCYTE_MEDIATED_IMMUNITY		63	-0.580169	-2.05913	0	0.00215099	0.055	884	tags=29%, list=8%, signal=31%
GO_CELLULAR_RESPONSE_TO_CYTOKINE_STIMULUS	GO_CELLULAR_RESPONSE_TO_CYTOKINE_STIMULUS		390	-0.45968	-2.05844	0	0.00212861	0.056	1822	tags=30%, list=16%, signal=34%
GO_REGULATION_OF_CELL_KILLING	GO_REGULATION_OF_CELL_KILLING		45	-0.637289	-2.05516	0	0.00217821	0.059	1543	tags=40%, list=13%, signal=46%
GO_PEPTIDYL_ASPARAGINE_MODIFICATION	GO_PEPTIDYL_ASPARAGINE_MODIFICATION		32	-0.683988	-2.04852	0	0.00250228	0.07	1527	tags=38%, list=13%, signal=43%
GO_INTRINSIC_COMPONENT_OF_ENDOPLASMIC_RETICULUM_MEMBRANE	GO_INTRINSIC_COMPONENT_OF_ENDOPLASMIC_RETICULUM_MEMBRANE		111	-0.541299	-2.04776	0	0.00250666	0.07	1107	tags=28%, list=10%, signal=31%
GO_REGULATION_OF_T_CELL_DIFFERENTIATION	GO_REGULATION_OF_T_CELL_DIFFERENTIATION		70	-0.578199	-2.04421	0	0.00264007	0.076	1017	tags=29%, list=9%, signal=31%
GO_CALCIUM_ION_TRANSMEMBRANE_TRANSPORT	GO_CALCIUM_ION_TRANSMEMBRANE_TRANSPORT		70	-0.56706	-2.03674	0	0.0029261	0.086	1141	tags=26%, list=10%, signal=28%
GO_POSITIVE_REGULATION_OF_LEUKOCYTE_DIFFERENTIATION	GO_POSITIVE_REGULATION_OF_LEUKOCYTE_DIFFERENTIATION		93	-0.538931	-2.0313	0	0.00317147	0.094	1017	tags=30%, list=9%, signal=33%
GO_POSITIVE_REGULATION_OF_PEPTIDYL_TYROSINE_PHOSPHORYLATION	GO_POSITIVE_REGULATION_OF_PEPTIDYL_TYROSINE_PHOSPHORYLATION		86	-0.542937	-2.02514	0	0.00334629	0.101	2226	tags=43%, list=19%, signal=53%
GO_POSITIVE_REGULATION_OF_IMMUNE_EFFECTOR_PROCESS	GO_POSITIVE_REGULATION_OF_IMMUNE_EFFECTOR_PROCESS		111	-0.525572	-2.02374	0	0.00330015	0.102	2136	tags=38%, list=18%, signal=46%
GO_REGULATION_OF_LEUKOCYTE_PROLIFERATION	GO_REGULATION_OF_LEUKOCYTE_PROLIFERATION		147	-0.508745	-2.01782	0	0.00346203	0.107	2328	tags=39%, list=20%, signal=48%
GO_POSITIVE_REGULATION_OF_CELL_CELL_ADHESION	GO_POSITIVE_REGULATION_OF_CELL_CELL_ADHESION		163	-0.496392	-2.01489	0	0.00352832	0.112	1887	tags=35%, list=16%, signal=41%
GO_REGULATION_OF_HEART_CONTRACTION	GO_REGULATION_OF_HEART_CONTRACTION		91	-0.539863	-2.01441	0	0.00345325	0.112	1483	tags=30%, list=13%, signal=34%
GO_PROTEIN_N_LINKED_GLYCOSYLATION	GO_PROTEIN_N_LINKED_GLYCOSYLATION		60	-0.573546	-2.01291	0	0.00346425	0.115	1547	tags=32%, list=13%, signal=36%
GO_POSITIVE_REGULATION_OF_CHEMOKINE_PRODUCTION	GO_POSITIVE_REGULATION_OF_CHEMOKINE_PRODUCTION		30	-0.676428	-2.00753	0.00200803	0.00371685	0.126	2136	tags=47%, list=18%, signal=57%
GO_REGULATION_OF_ALPHA_BETA_T_CELL_ACTIVATION	GO_REGULATION_OF_ALPHA_BETA_T_CELL_ACTIVATION		50	-0.596341	-2.0018	0	0.00401247	0.138	2102	tags=44%, list=18%, signal=54%
GO_MHC_PROTEIN_COMPLEX	GO_MHC_PROTEIN_COMPLEX		23	-0.711482	-2.00162	0	0.00395899	0.139	2643	tags=70%, list=23%, signal=90%
GO_REGULATION_OF_LIPID_BIOSYNTHETIC_PROCESS	GO_REGULATION_OF_LIPID_BIOSYNTHETIC_PROCESS		77	-0.55411	-1.99949	0	0.00395877	0.142	1262	tags=29%, list=11%, signal=32%
GO_LYMPHOCYTE_CHEMOTAXIS	GO_LYMPHOCYTE_CHEMOTAXIS		22	-0.714015	-1.99587	0	0.00425408	0.155	1012	tags=41%, list=9%, signal=45%
GO_REGULATION_OF_INNATE_IMMUNE_RESPONSE	GO_REGULATION_OF_INNATE_IMMUNE_RESPONSE		269	-0.459891	-1.99255	0	0.00434552	0.162	1791	tags=30%, list=15%, signal=34%
GO_POSITIVE_REGULATION_OF_CYTOKINE_PRODUCTION	GO_POSITIVE_REGULATION_OF_CYTOKINE_PRODUCTION		255	-0.464222	-1.99243	0	0.00426651	0.162	1791	tags=31%, list=15%, signal=35%
GO_CHEMOKINE_RECEPTOR_BINDING	GO_CHEMOKINE_RECEPTOR_BINDING		29	-0.668101	-1.99134	0	0.00421386	0.163	491	tags=24%, list=4%, signal=25%
GO_REGULATION_OF_STEROID_BIOSYNTHETIC_PROCESS	GO_REGULATION_OF_STEROID_BIOSYNTHETIC_PROCESS		28	-0.65603	-1.99134	0	0.00413993	0.163	1543	tags=32%, list=13%, signal=37%
GO_ANTIGEN_BINDING	GO_ANTIGEN_BINDING		55	-0.594089	-1.98722	0	0.00443051	0.178	2328	tags=55%, list=20%, signal=68%
GO_POSITIVE_REGULATION_OF_LOCOMOTION	GO_POSITIVE_REGULATION_OF_LOCOMOTION		229	-0.469232	-1.98697	0	0.00437747	0.179	2230	tags=34%, list=19%, signal=42%
GO_REGULATION_OF_RESPONSE_TO_WOUNDING	GO_REGULATION_OF_RESPONSE_TO_WOUNDING		216	-0.467663	-1.98315	0	0.0046553	0.193	1596	tags=26%, list=14%, signal=30%
GO_REGULATION_OF_CYTOKINE_PRODUCTION	GO_REGULATION_OF_CYTOKINE_PRODUCTION		381	-0.443112	-1.97861	0	0.00494888	0.204	1017	tags=21%, list=9%, signal=23%
GO_POSITIVE_REGULATION_OF_CYTOKINE_SECRETION	GO_POSITIVE_REGULATION_OF_CYTOKINE_SECRETION		60	-0.570961	-1.97551	0	0.00510295	0.215	2425	tags=50%, list=21%, signal=63%
GO_LYMPHOCYTE_MIGRATION	GO_LYMPHOCYTE_MIGRATION		29	-0.661119	-1.97505	0	0.00506361	0.217	660	tags=28%, list=6%, signal=29%
GO_ER_TO_GOLGI_TRANSPORT_VESICLE_MEMBRANE	GO_ER_TO_GOLGI_TRANSPORT_VESICLE_MEMBRANE		46	-0.600668	-1.97405	0	0.00506562	0.22	714	tags=26%, list=6%, signal=28%
GO_POSITIVE_REGULATION_OF_T_CELL_PROLIFERATION	GO_POSITIVE_REGULATION_OF_T_CELL_PROLIFERATION		69	-0.55581	-1.97178	0	0.00513116	0.226	1887	tags=39%, list=16%, signal=46%
GO_REGULATION_OF_PEPTIDYL_SERINE_PHOSPHORYLATION	GO_REGULATION_OF_PEPTIDYL_SERINE_PHOSPHORYLATION		69	-0.549619	-1.97126	0	0.00507367	0.226	1791	tags=35%, list=15%, signal=41%
GO_PEPTIDE_ANTIGEN_BINDING	GO_PEPTIDE_ANTIGEN_BINDING		23	-0.698036	-1.97065	0	0.00507682	0.228	1427	tags=52%, list=12%, signal=59%
GO_MHC_PROTEIN_BINDING	GO_MHC_PROTEIN_BINDING		22	-0.69951	-1.97009	0.00212766	0.00504064	0.23	769	tags=36%, list=7%, signal=39%
GO_REGULATION_OF_ERK1_AND_ERK2_CASCADE	GO_REGULATION_OF_ERK1_AND_ERK2_CASCADE		136	-0.493121	-1.96999	0	0.00496759	0.23	2152	tags=39%, list=19%, signal=47%
GO_IRE1_MEDIATED_UNFOLDED_PROTEIN_RESPONSE	GO_IRE1_MEDIATED_UNFOLDED_PROTEIN_RESPONSE		52	-0.584521	-1.96439	0	0.00529259	0.245	1836	tags=44%, list=16%, signal=52%
GO_CALCIUM_ION_IMPORT_INTO_CYTOSOL	GO_CALCIUM_ION_IMPORT_INTO_CYTOSOL		28	-0.665367	-1.96408	0	0.00527483	0.247	1141	tags=29%, list=10%, signal=32%
GO_REGULATION_OF_LEUKOCYTE_DIFFERENTIATION	GO_REGULATION_OF_LEUKOCYTE_DIFFERENTIATION		151	-0.490659	-1.96355	0	0.00521971	0.247	1017	tags=25%, list=9%, signal=27%
GO_POSITIVE_REGULATION_OF_PRODUCTION_OF_MOLECULAR_MEDIATOR_OF_IMMUNE_RESPONSE	GO_POSITIVE_REGULATION_OF_PRODUCTION_OF_MOLECULAR_MEDIATOR_OF_IMMUNE_RESPONSE		43	-0.598179	-1.96334	0	0.00518438	0.249	2214	tags=53%, list=19%, signal=66%
GO_REGULATION_OF_NITRIC_OXIDE_BIOSYNTHETIC_PROCESS	GO_REGULATION_OF_NITRIC_OXIDE_BIOSYNTHETIC_PROCESS		32	-0.635711	-1.96281	0	0.00518546	0.253	838	tags=38%, list=7%, signal=40%
GO_REGULATION_OF_CELL_CELL_ADHESION	GO_REGULATION_OF_CELL_CELL_ADHESION		251	-0.461466	-1.96206	0	0.00518649	0.256	1887	tags=30%, list=16%, signal=35%
GO_CALCIUM_ION_IMPORT	GO_CALCIUM_ION_IMPORT		39	-0.623535	-1.95924	0	0.00530791	0.265	1141	tags=28%, list=10%, signal=31%
GO_REGULATION_OF_PEPTIDYL_TYROSINE_PHOSPHORYLATION	GO_REGULATION_OF_PEPTIDYL_TYROSINE_PHOSPHORYLATION		121	-0.502991	-1.95741	0	0.0053758	0.269	2226	tags=40%, list=19%, signal=49%
GO_SIDE_OF_MEMBRANE	GO_SIDE_OF_MEMBRANE		255	-0.452331	-1.95652	0	0.00532366	0.269	2328	tags=38%, list=20%, signal=46%
GO_TAXIS	GO_TAXIS		222	-0.464102	-1.95545	0	0.00534104	0.27	2418	tags=36%, list=21%, signal=44%
GO_POSITIVE_REGULATION_OF_PEPTIDYL_SERINE_PHOSPHORYLATION	GO_POSITIVE_REGULATION_OF_PEPTIDYL_SERINE_PHOSPHORYLATION		51	-0.581425	-1.95491	0	0.00534075	0.273	1791	tags=39%, list=15%, signal=46%
GO_LUMENAL_SIDE_OF_MEMBRANE	GO_LUMENAL_SIDE_OF_MEMBRANE		30	-0.653066	-1.95447	0	0.00530747	0.274	1014	tags=40%, list=9%, signal=44%
GO_INNATE_IMMUNE_RESPONSE	GO_INNATE_IMMUNE_RESPONSE		339	-0.444066	-1.95015	0	0.00574207	0.295	1822	tags=29%, list=16%, signal=33%
GO_REGULATION_OF_HOMOTYPIC_CELL_CELL_ADHESION	GO_REGULATION_OF_HOMOTYPIC_CELL_CELL_ADHESION		214	-0.459857	-1.94497	0	0.00599118	0.309	1887	tags=29%, list=16%, signal=35%
GO_POSITIVE_REGULATION_OF_CELL_ACTIVATION	GO_POSITIVE_REGULATION_OF_CELL_ACTIVATION		205	-0.466249	-1.94493	0	0.00593592	0.31	2331	tags=40%, list=20%, signal=49%
GO_CELLULAR_EXTRAVASATION	GO_CELLULAR_EXTRAVASATION		16	-0.743172	-1.94417	0	0.0059591	0.315	1792	tags=63%, list=15%, signal=74%
GO_EXOCRINE_SYSTEM_DEVELOPMENT	GO_EXOCRINE_SYSTEM_DEVELOPMENT		17	-0.725421	-1.94301	0	0.00605779	0.321	1615	tags=59%, list=14%, signal=68%
GO_REGULATION_OF_LYMPHOCYTE_DIFFERENTIATION	GO_REGULATION_OF_LYMPHOCYTE_DIFFERENTIATION		86	-0.525357	-1.94135	0	0.00615534	0.328	1017	tags=27%, list=9%, signal=29%
GO_RESPONSE_TO_TOPOLOGICALLY_INCORRECT_PROTEIN	GO_RESPONSE_TO_TOPOLOGICALLY_INCORRECT_PROTEIN		136	-0.483597	-1.9412	0	0.00611524	0.33	1836	tags=33%, list=16%, signal=39%
GO_REGULATION_OF_PROTEIN_SECRETION	GO_REGULATION_OF_PROTEIN_SECRETION		221	-0.460938	-1.94077	0	0.00610576	0.333	1646	tags=29%, list=14%, signal=34%
GO_REGULATION_OF_T_CELL_MEDIATED_CYTOTOXICITY	GO_REGULATION_OF_T_CELL_MEDIATED_CYTOTOXICITY		20	-0.718489	-1.94048	0.00209205	0.00609621	0.335	2083	tags=50%, list=18%, signal=61%
GO_POSITIVE_REGULATION_OF_RESPONSE_TO_EXTERNAL_STIMULUS	GO_POSITIVE_REGULATION_OF_RESPONSE_TO_EXTERNAL_STIMULUS		174	-0.478249	-1.93996	0	0.00608726	0.336	1845	tags=29%, list=16%, signal=34%
GO_REGULATION_OF_CHEMOKINE_PRODUCTION	GO_REGULATION_OF_CHEMOKINE_PRODUCTION		37	-0.616802	-1.93987	0	0.00602109	0.336	2136	tags=41%, list=18%, signal=50%
GO_NEGATIVE_REGULATION_OF_RESPONSE_TO_ENDOPLASMIC_RETICULUM_STRESS	GO_NEGATIVE_REGULATION_OF_RESPONSE_TO_ENDOPLASMIC_RETICULUM_STRESS		32	-0.64047	-1.93875	0.00194553	0.00606912	0.342	615	tags=28%, list=5%, signal=30%
GO_REGULATION_OF_ALCOHOL_BIOSYNTHETIC_PROCESS	GO_REGULATION_OF_ALCOHOL_BIOSYNTHETIC_PROCESS		26	-0.662749	-1.93821	0	0.0060322	0.343	1519	tags=35%, list=13%, signal=40%
GO_POSITIVE_REGULATION_OF_IMMUNE_RESPONSE	GO_POSITIVE_REGULATION_OF_IMMUNE_RESPONSE		387	-0.431903	-1.93525	0	0.006107	0.351	2379	tags=34%, list=21%, signal=42%
GO_POSITIVE_REGULATION_OF_DEFENSE_RESPONSE	GO_POSITIVE_REGULATION_OF_DEFENSE_RESPONSE		260	-0.455087	-1.93487	0	0.00608436	0.352	1791	tags=28%, list=15%, signal=32%
GO_REGULATION_OF_ADAPTIVE_IMMUNE_RESPONSE	GO_REGULATION_OF_ADAPTIVE_IMMUNE_RESPONSE		88	-0.520506	-1.92619	0	0.00678343	0.388	884	tags=22%, list=8%, signal=23%
GO_NEGATIVE_REGULATION_OF_MULTI_ORGANISM_PROCESS	GO_NEGATIVE_REGULATION_OF_MULTI_ORGANISM_PROCESS		100	-0.506706	-1.9221	0	0.00717065	0.408	1489	tags=28%, list=13%, signal=32%
GO_CALCIUM_ION_TRANSPORT	GO_CALCIUM_ION_TRANSPORT		102	-0.507847	-1.91897	0	0.00732378	0.42	1141	tags=25%, list=10%, signal=27%
GO_DEFENSE_RESPONSE_TO_VIRUS	GO_DEFENSE_RESPONSE_TO_VIRUS		116	-0.500792	-1.91716	0	0.0074616	0.431	2281	tags=41%, list=20%, signal=50%
GO_POSITIVE_REGULATION_OF_LIPID_BIOSYNTHETIC_PROCESS	GO_POSITIVE_REGULATION_OF_LIPID_BIOSYNTHETIC_PROCESS		40	-0.595673	-1.91608	0	0.00749138	0.435	1235	tags=30%, list=11%, signal=33%
GO_ER_TO_GOLGI_TRANSPORT_VESICLE	GO_ER_TO_GOLGI_TRANSPORT_VESICLE		61	-0.547734	-1.91372	0	0.00776547	0.453	714	tags=23%, list=6%, signal=24%
GO_POSITIVE_REGULATION_OF_CELL_ADHESION	GO_POSITIVE_REGULATION_OF_CELL_ADHESION		236	-0.452236	-1.912	0	0.00793438	0.463	1887	tags=31%, list=16%, signal=37%
GO_REGULATION_OF_LEUKOCYTE_MEDIATED_CYTOTOXICITY	GO_REGULATION_OF_LEUKOCYTE_MEDIATED_CYTOTOXICITY		40	-0.595325	-1.91065	0	0.00806071	0.473	1543	tags=38%, list=13%, signal=43%
GO_POSITIVE_REGULATION_OF_ADAPTIVE_IMMUNE_RESPONSE	GO_POSITIVE_REGULATION_OF_ADAPTIVE_IMMUNE_RESPONSE		54	-0.561099	-1.91046	0	0.00798395	0.473	1551	tags=33%, list=13%, signal=38%
GO_POSITIVE_REGULATION_OF_HEMOPOIESIS	GO_POSITIVE_REGULATION_OF_HEMOPOIESIS		118	-0.490837	-1.90879	0	0.00814594	0.483	2181	tags=41%, list=19%, signal=50%
GO_REGULATION_OF_BLOOD_CIRCULATION	GO_REGULATION_OF_BLOOD_CIRCULATION		122	-0.486518	-1.90712	0	0.00826545	0.489	1543	tags=30%, list=13%, signal=34%
GO_POSITIVE_REGULATION_OF_ALPHA_BETA_T_CELL_ACTIVATION	GO_POSITIVE_REGULATION_OF_ALPHA_BETA_T_CELL_ACTIVATION		39	-0.601926	-1.90676	0	0.00826228	0.492	1766	tags=44%, list=15%, signal=51%
GO_POSITIVE_REGULATION_OF_EPITHELIAL_CELL_PROLIFERATION	GO_POSITIVE_REGULATION_OF_EPITHELIAL_CELL_PROLIFERATION		75	-0.529442	-1.90643	0	0.00822379	0.495	1601	tags=33%, list=14%, signal=38%
GO_REGULATION_OF_INFLAMMATORY_RESPONSE	GO_REGULATION_OF_INFLAMMATORY_RESPONSE		158	-0.473201	-1.90292	0	0.00862828	0.512	1596	tags=27%, list=14%, signal=30%
GO_REGULATION_OF_STEROID_METABOLIC_PROCESS	GO_REGULATION_OF_STEROID_METABOLIC_PROCESS		40	-0.602671	-1.89942	0	0.00897707	0.53	1262	tags=25%, list=11%, signal=28%
GO_POSITIVE_REGULATION_OF_CELL_KILLING	GO_POSITIVE_REGULATION_OF_CELL_KILLING		29	-0.651023	-1.8991	0	0.00893237	0.531	1425	tags=41%, list=12%, signal=47%
GO_CHEMOKINE_ACTIVITY	GO_CHEMOKINE_ACTIVITY		22	-0.693431	-1.89757	0	0.0090161	0.539	491	tags=32%, list=4%, signal=33%
GO_POSITIVE_REGULATION_OF_PROTEIN_SECRETION	GO_POSITIVE_REGULATION_OF_PROTEIN_SECRETION		124	-0.487412	-1.89503	0	0.00928425	0.547	1646	tags=32%, list=14%, signal=37%
GO_POSITIVE_REGULATION_OF_LYMPHOCYTE_MEDIATED_IMMUNITY	GO_POSITIVE_REGULATION_OF_LYMPHOCYTE_MEDIATED_IMMUNITY		52	-0.561334	-1.89466	0	0.00931773	0.55	884	tags=27%, list=8%, signal=29%
GO_G_PROTEIN_COUPLED_RECEPTOR_BINDING	GO_G_PROTEIN_COUPLED_RECEPTOR_BINDING		110	-0.490944	-1.89271	0	0.00950037	0.559	1448	tags=25%, list=13%, signal=28%
GO_NEGATIVE_REGULATION_OF_ENDOPLASMIC_RETICULUM_STRESS_INDUCED_INTRINSIC_APOPTOTIC_SIGNALING_PATHWAY	GO_NEGATIVE_REGULATION_OF_ENDOPLASMIC_RETICULUM_STRESS_INDUCED_INTRINSIC_APOPTOTIC_SIGNALING_PATHWAY		15	-0.73507	-1.89268	0.00210084	0.00941917	0.559	552	tags=40%, list=5%, signal=42%
GO_SYNAPTIC_VESICLE_CYCLE	GO_SYNAPTIC_VESICLE_CYCLE		40	-0.593901	-1.88944	0	0.00970807	0.572	1043	tags=23%, list=9%, signal=25%
GO_TRANSFERASE_ACTIVITY_TRANSFERRING_GLYCOSYL_GROUPS	GO_TRANSFERASE_ACTIVITY_TRANSFERRING_GLYCOSYL_GROUPS		173	-0.457266	-1.88831	0	0.00974949	0.576	1568	tags=31%, list=14%, signal=35%
GO_GLYCOPROTEIN_METABOLIC_PROCESS	GO_GLYCOPROTEIN_METABOLIC_PROCESS		207	-0.451748	-1.88828	0	0.00966824	0.576	1604	tags=31%, list=14%, signal=35%
GO_LEUKOCYTE_CELL_CELL_ADHESION	GO_LEUKOCYTE_CELL_CELL_ADHESION		168	-0.460438	-1.88491	0	0.0100238	0.592	832	tags=20%, list=7%, signal=21%
GO_POSITIVE_REGULATION_OF_I_KAPPAB_KINASE_NF_KAPPAB_SIGNALING	GO_POSITIVE_REGULATION_OF_I_KAPPAB_KINASE_NF_KAPPAB_SIGNALING		142	-0.472545	-1.88334	0	0.0102009	0.601	2078	tags=31%, list=18%, signal=37%
GO_POSITIVE_REGULATION_OF_LEUKOCYTE_PROLIFERATION	GO_POSITIVE_REGULATION_OF_LEUKOCYTE_PROLIFERATION		95	-0.501493	-1.8833	0	0.010118	0.601	2310	tags=42%, list=20%, signal=52%
GO_POSITIVE_REGULATION_OF_TUMOR_NECROSIS_FACTOR_SUPERFAMILY_CYTOKINE_PRODUCTION	GO_POSITIVE_REGULATION_OF_TUMOR_NECROSIS_FACTOR_SUPERFAMILY_CYTOKINE_PRODUCTION		41	-0.585781	-1.88294	0	0.0100895	0.604	2055	tags=49%, list=18%, signal=59%
GO_REGULATION_OF_NEUROLOGICAL_SYSTEM_PROCESS	GO_REGULATION_OF_NEUROLOGICAL_SYSTEM_PROCESS		29	-0.641636	-1.88198	0	0.0101569	0.61	1082	tags=31%, list=9%, signal=34%
GO_NEGATIVE_REGULATION_OF_PROTEIN_SECRETION	GO_NEGATIVE_REGULATION_OF_PROTEIN_SECRETION		58	-0.546333	-1.88142	0	0.0102024	0.612	760	tags=28%, list=7%, signal=29%
GO_REGULATION_OF_REACTIVE_OXYGEN_SPECIES_BIOSYNTHETIC_PROCESS	GO_REGULATION_OF_REACTIVE_OXYGEN_SPECIES_BIOSYNTHETIC_PROCESS		40	-0.585585	-1.88021	0	0.0102666	0.615	961	tags=35%, list=8%, signal=38%
GO_PROTEIN_SECRETION	GO_PROTEIN_SECRETION		59	-0.544936	-1.87622	0	0.0108656	0.642	2373	tags=47%, list=20%, signal=59%
GO_REGULATION_OF_VIRAL_ENTRY_INTO_HOST_CELL	GO_REGULATION_OF_VIRAL_ENTRY_INTO_HOST_CELL		16	-0.718303	-1.87553	0	0.0108632	0.644	1784	tags=50%, list=15%, signal=59%
GO_LEUKOCYTE_DIFFERENTIATION	GO_LEUKOCYTE_DIFFERENTIATION		194	-0.447608	-1.86781	0	0.0120682	0.689	1627	tags=28%, list=14%, signal=32%
GO_POSITIVE_REGULATION_OF_INTERLEUKIN_1_SECRETION	GO_POSITIVE_REGULATION_OF_INTERLEUKIN_1_SECRETION		16	-0.699858	-1.86615	0.00201613	0.0122677	0.7	2369	tags=63%, list=20%, signal=78%
GO_INFLAMMATORY_RESPONSE	GO_INFLAMMATORY_RESPONSE		244	-0.440758	-1.86585	0	0.0121948	0.7	1019	tags=20%, list=9%, signal=22%
GO_REGULATION_OF_CHEMOTAXIS	GO_REGULATION_OF_CHEMOTAXIS		91	-0.50215	-1.86544	0	0.0121627	0.702	2417	tags=41%, list=21%, signal=51%
GO_POSITIVE_REGULATION_OF_NF_KAPPAB_TRANSCRIPTION_FACTOR_ACTIVITY	GO_POSITIVE_REGULATION_OF_NF_KAPPAB_TRANSCRIPTION_FACTOR_ACTIVITY		98	-0.492576	-1.86209	0	0.0126212	0.716	2102	tags=33%, list=18%, signal=40%
GO_NEGATIVE_REGULATION_OF_OSSIFICATION	GO_NEGATIVE_REGULATION_OF_OSSIFICATION		30	-0.609573	-1.86011	0	0.0127706	0.724	1822	tags=40%, list=16%, signal=47%
GO_REGULATION_OF_PRODUCTION_OF_MOLECULAR_MEDIATOR_OF_IMMUNE_RESPONSE	GO_REGULATION_OF_PRODUCTION_OF_MOLECULAR_MEDIATOR_OF_IMMUNE_RESPONSE		64	-0.532066	-1.85915	0.00211864	0.0128023	0.727	760	tags=27%, list=7%, signal=28%
GO_AMINOGLYCAN_BIOSYNTHETIC_PROCESS	GO_AMINOGLYCAN_BIOSYNTHETIC_PROCESS		51	-0.554151	-1.85733	0	0.0130162	0.735	1604	tags=31%, list=14%, signal=36%
GO_RESPONSE_TO_ENDOPLASMIC_RETICULUM_STRESS	GO_RESPONSE_TO_ENDOPLASMIC_RETICULUM_STRESS		197	-0.448588	-1.85704	0	0.0129505	0.736	1836	tags=29%, list=16%, signal=34%
GO_REGULATION_OF_INTERLEUKIN_12_PRODUCTION	GO_REGULATION_OF_INTERLEUKIN_12_PRODUCTION		38	-0.594415	-1.85654	0.00219298	0.0129333	0.737	1017	tags=32%, list=9%, signal=35%
GO_CELLULAR_RESPONSE_TO_CALCIUM_ION	GO_CELLULAR_RESPONSE_TO_CALCIUM_ION		28	-0.617941	-1.85648	0	0.01286	0.738	889	tags=32%, list=8%, signal=35%
GO_POSITIVE_REGULATION_OF_PROTEIN_KINASE_B_SIGNALING	GO_POSITIVE_REGULATION_OF_PROTEIN_KINASE_B_SIGNALING		42	-0.571267	-1.85481	0.00437637	0.0129645	0.742	1156	tags=33%, list=10%, signal=37%
GO_CELL_MOTILITY	GO_CELL_MOTILITY		438	-0.411678	-1.85104	0	0.0136081	0.764	1925	tags=26%, list=17%, signal=30%
GO_COLLAGEN_BINDING	GO_COLLAGEN_BINDING		29	-0.616391	-1.84844	0.00204082	0.0140215	0.782	1751	tags=34%, list=15%, signal=41%
GO_POSITIVE_REGULATION_OF_OXIDOREDUCTASE_ACTIVITY	GO_POSITIVE_REGULATION_OF_OXIDOREDUCTASE_ACTIVITY		28	-0.61426	-1.84291	0.00406504	0.0150218	0.802	304	tags=21%, list=3%, signal=22%
GO_POSITIVE_REGULATION_OF_INTERLEUKIN_1_BETA_PRODUCTION	GO_POSITIVE_REGULATION_OF_INTERLEUKIN_1_BETA_PRODUCTION		21	-0.662639	-1.84042	0	0.0153729	0.813	2369	tags=57%, list=20%, signal=72%
GO_POSITIVE_REGULATION_OF_REACTIVE_OXYGEN_SPECIES_BIOSYNTHETIC_PROCESS	GO_POSITIVE_REGULATION_OF_REACTIVE_OXYGEN_SPECIES_BIOSYNTHETIC_PROCESS		31	-0.614778	-1.83898	0.00202429	0.0154936	0.817	961	tags=35%, list=8%, signal=39%
GO_DIVALENT_INORGANIC_CATION_HOMEOSTASIS	GO_DIVALENT_INORGANIC_CATION_HOMEOSTASIS		160	-0.451455	-1.83815	0	0.0156493	0.824	1985	tags=31%, list=17%, signal=36%
GO_EXTERNAL_SIDE_OF_PLASMA_MEMBRANE	GO_EXTERNAL_SIDE_OF_PLASMA_MEMBRANE		118	-0.470198	-1.83802	0	0.0155522	0.825	2083	tags=35%, list=18%, signal=42%
GO_REGULATION_OF_SEQUENCE_SPECIFIC_DNA_BINDING_TRANSCRIPTION_FACTOR_ACTIVITY	GO_REGULATION_OF_SEQUENCE_SPECIFIC_DNA_BINDING_TRANSCRIPTION_FACTOR_ACTIVITY		241	-0.432397	-1.83722	0	0.015696	0.832	1788	tags=26%, list=15%, signal=30%
GO_REGULATION_OF_INTERFERON_GAMMA_PRODUCTION	GO_REGULATION_OF_INTERFERON_GAMMA_PRODUCTION		66	-0.518547	-1.83236	0	0.0166012	0.851	1017	tags=27%, list=9%, signal=30%
GO_NEGATIVE_REGULATION_OF_VIRAL_TRANSCRIPTION	GO_NEGATIVE_REGULATION_OF_VIRAL_TRANSCRIPTION		16	-0.711867	-1.83071	0.00214133	0.0167969	0.856	1022	tags=31%, list=9%, signal=34%
GO_ENDOPLASMIC_RETICULUM_LUMEN	GO_ENDOPLASMIC_RETICULUM_LUMEN		97	-0.483746	-1.82877	0	0.0170671	0.861	2031	tags=35%, list=18%, signal=42%
GO_POSITIVE_REGULATION_OF_INTERLEUKIN_12_PRODUCTION	GO_POSITIVE_REGULATION_OF_INTERLEUKIN_12_PRODUCTION		23	-0.651574	-1.82541	0.00211416	0.0177144	0.873	211	tags=26%, list=2%, signal=27%
GO_REGULATION_OF_STRIATED_MUSCLE_CONTRACTION	GO_REGULATION_OF_STRIATED_MUSCLE_CONTRACTION		38	-0.566117	-1.82289	0.00212314	0.0180694	0.879	1710	tags=37%, list=15%, signal=43%
GO_OLIGOSACCHARIDE_METABOLIC_PROCESS	GO_OLIGOSACCHARIDE_METABOLIC_PROCESS		42	-0.555952	-1.82217	0.00208768	0.0180718	0.884	1812	tags=40%, list=16%, signal=48%
GO_NEGATIVE_REGULATION_OF_HOMOTYPIC_CELL_CELL_ADHESION	GO_NEGATIVE_REGULATION_OF_HOMOTYPIC_CELL_CELL_ADHESION		72	-0.506479	-1.82011	0.0020284	0.0184376	0.892	1133	tags=25%, list=10%, signal=28%
GO_TRANSCRIPTION_FACTOR_ACTIVITY_RNA_POLYMERASE_II_CORE_PROMOTER_PROXIMAL_REGION_SEQUENCE_SPECIFIC_BINDING	GO_TRANSCRIPTION_FACTOR_ACTIVITY_RNA_POLYMERASE_II_CORE_PROMOTER_PROXIMAL_REGION_SEQUENCE_SPECIFIC_BINDING		169	-0.445516	-1.81976	0	0.0184201	0.892	1603	tags=23%, list=14%, signal=26%
GO_REGULATION_OF_ESTABLISHMENT_OF_PROTEIN_LOCALIZATION_TO_PLASMA_MEMBRANE	GO_REGULATION_OF_ESTABLISHMENT_OF_PROTEIN_LOCALIZATION_TO_PLASMA_MEMBRANE		33	-0.582928	-1.8193	0.00421053	0.0183623	0.893	550	tags=21%, list=5%, signal=22%
GO_DIVALENT_INORGANIC_CATION_TRANSPORT	GO_DIVALENT_INORGANIC_CATION_TRANSPORT		129	-0.46619	-1.81905	0	0.0182962	0.893	1141	tags=22%, list=10%, signal=24%
GO_REGULATION_OF_SECRETION	GO_REGULATION_OF_SECRETION		370	-0.408321	-1.81761	0	0.0185206	0.899	1551	tags=23%, list=13%, signal=26%
GO_RESPONSE_TO_VIRUS	GO_RESPONSE_TO_VIRUS		181	-0.438939	-1.81737	0	0.0184551	0.901	2281	tags=36%, list=20%, signal=45%
GO_POSITIVE_REGULATION_OF_INTERLEUKIN_1_PRODUCTION	GO_POSITIVE_REGULATION_OF_INTERLEUKIN_1_PRODUCTION		24	-0.628081	-1.81602	0.00414079	0.0186592	0.905	2369	tags=54%, list=20%, signal=68%
GO_RESPONSE_TO_INTERFERON_BETA	GO_RESPONSE_TO_INTERFERON_BETA		19	-0.665522	-1.816	0.0019802	0.0185447	0.905	1791	tags=47%, list=15%, signal=56%
GO_NEGATIVE_REGULATION_OF_SECRETION	GO_NEGATIVE_REGULATION_OF_SECRETION		104	-0.478384	-1.81543	0.00204499	0.018576	0.906	1586	tags=29%, list=14%, signal=33%
GO_GOLGI_CISTERNA	GO_GOLGI_CISTERNA		73	-0.498291	-1.81294	0	0.0191409	0.912	1568	tags=29%, list=14%, signal=33%
GO_REGULATION_OF_TOLL_LIKE_RECEPTOR_SIGNALING_PATHWAY	GO_REGULATION_OF_TOLL_LIKE_RECEPTOR_SIGNALING_PATHWAY		31	-0.597456	-1.81209	0.0021097	0.0192563	0.914	1460	tags=39%, list=13%, signal=44%
GO_ACTIVATION_OF_IMMUNE_RESPONSE	GO_ACTIVATION_OF_IMMUNE_RESPONSE		299	-0.416735	-1.81042	0	0.0195914	0.919	2352	tags=33%, list=20%, signal=40%
GO_SECOND_MESSENGER_MEDIATED_SIGNALING	GO_SECOND_MESSENGER_MEDIATED_SIGNALING		76	-0.501387	-1.80723	0.00206186	0.02029	0.929	2326	tags=37%, list=20%, signal=46%
GO_CALCIUM_ION_TRANSMEMBRANE_TRANSPORTER_ACTIVITY	GO_CALCIUM_ION_TRANSMEMBRANE_TRANSPORTER_ACTIVITY		51	-0.536249	-1.80662	0.0042735	0.0203415	0.931	1141	tags=27%, list=10%, signal=30%
GO_INTRINSIC_COMPONENT_OF_ORGANELLE_MEMBRANE	GO_INTRINSIC_COMPONENT_OF_ORGANELLE_MEMBRANE		206	-0.433814	-1.80343	0	0.0209514	0.934	1351	tags=22%, list=12%, signal=25%
GO_POSITIVE_REGULATION_OF_PROTEIN_LOCALIZATION_TO_CELL_PERIPHERY	GO_POSITIVE_REGULATION_OF_PROTEIN_LOCALIZATION_TO_CELL_PERIPHERY		22	-0.646373	-1.7997	0.00645161	0.021746	0.944	550	tags=27%, list=5%, signal=29%
GO_REGULATION_OF_BONE_RESORPTION	GO_REGULATION_OF_BONE_RESORPTION		21	-0.631071	-1.79924	0	0.0217813	0.944	1156	tags=38%, list=10%, signal=42%
GO_POSITIVE_REGULATION_OF_LEUKOCYTE_MIGRATION	GO_POSITIVE_REGULATION_OF_LEUKOCYTE_MIGRATION		61	-0.511927	-1.79914	0	0.0216861	0.944	1822	tags=36%, list=16%, signal=43%
GO_LEADING_EDGE_MEMBRANE	GO_LEADING_EDGE_MEMBRANE		83	-0.487085	-1.79862	0	0.0216895	0.945	1819	tags=33%, list=16%, signal=38%
GO_IMMUNE_RESPONSE_REGULATING_CELL_SURFACE_RECEPTOR_SIGNALING_PATHWAY	GO_IMMUNE_RESPONSE_REGULATING_CELL_SURFACE_RECEPTOR_SIGNALING_PATHWAY		241	-0.425094	-1.79545	0	0.0223046	0.95	2352	tags=33%, list=20%, signal=40%
GO_REGULATION_OF_ALPHA_BETA_T_CELL_PROLIFERATION	GO_REGULATION_OF_ALPHA_BETA_T_CELL_PROLIFERATION		19	-0.66465	-1.79467	0.00408998	0.0223954	0.95	1766	tags=63%, list=15%, signal=74%
GO_REGULATION_OF_LYMPHOCYTE_MEDIATED_IMMUNITY	GO_REGULATION_OF_LYMPHOCYTE_MEDIATED_IMMUNITY		85	-0.489904	-1.79452	0.00205761	0.0222838	0.95	1017	tags=24%, list=9%, signal=26%
GO_CELLULAR_CHEMICAL_HOMEOSTASIS	GO_CELLULAR_CHEMICAL_HOMEOSTASIS		278	-0.415768	-1.79381	0	0.0222854	0.951	1029	tags=20%, list=9%, signal=21%
GO_GROWTH_FACTOR_ACTIVITY	GO_GROWTH_FACTOR_ACTIVITY		52	-0.541546	-1.79066	0.00414079	0.0230296	0.957	1672	tags=35%, list=14%, signal=40%
GO_GLYCOSYLATION	GO_GLYCOSYLATION		166	-0.439128	-1.78944	0	0.0231872	0.957	1568	tags=30%, list=14%, signal=34%
GO_REGULATION_OF_LEUKOCYTE_MEDIATED_IMMUNITY	GO_REGULATION_OF_LEUKOCYTE_MEDIATED_IMMUNITY		115	-0.463989	-1.78932	0.00225734	0.0231099	0.957	884	tags=20%, list=8%, signal=21%
GO_NON_MEMBRANE_SPANNING_PROTEIN_TYROSINE_KINASE_ACTIVITY	GO_NON_MEMBRANE_SPANNING_PROTEIN_TYROSINE_KINASE_ACTIVITY		36	-0.573756	-1.78829	0.00206612	0.0233596	0.958	2226	tags=53%, list=19%, signal=65%
GO_NEGATIVE_REGULATION_OF_ESTABLISHMENT_OF_PROTEIN_LOCALIZATION	GO_NEGATIVE_REGULATION_OF_ESTABLISHMENT_OF_PROTEIN_LOCALIZATION		134	-0.453081	-1.78417	0	0.0243392	0.965	1414	tags=25%, list=12%, signal=28%
GO_RESPONSE_TO_PEPTIDE	GO_RESPONSE_TO_PEPTIDE		252	-0.410899	-1.78407	0	0.0242215	0.965	2166	tags=29%, list=19%, signal=34%
GO_RESPONSE_TO_MOLECULE_OF_BACTERIAL_ORIGIN	GO_RESPONSE_TO_MOLECULE_OF_BACTERIAL_ORIGIN		204	-0.42948	-1.7813	0	0.0248309	0.968	1061	tags=22%, list=9%, signal=24%
GO_POSITIVE_REGULATION_OF_B_CELL_MEDIATED_IMMUNITY	GO_POSITIVE_REGULATION_OF_B_CELL_MEDIATED_IMMUNITY		18	-0.667551	-1.78088	0.00608519	0.0247967	0.968	604	tags=33%, list=5%, signal=35%
GO_REGULATION_OF_CELLULAR_COMPONENT_MOVEMENT	GO_REGULATION_OF_CELLULAR_COMPONENT_MOVEMENT		420	-0.395107	-1.77708	0	0.0257641	0.971	2168	tags=28%, list=19%, signal=34%
GO_NEGATIVE_REGULATION_OF_FAT_CELL_DIFFERENTIATION	GO_NEGATIVE_REGULATION_OF_FAT_CELL_DIFFERENTIATION		22	-0.635208	-1.77524	0.00397614	0.0261754	0.974	530	tags=18%, list=5%, signal=19%
GO_CELLULAR_RESPONSE_TO_TOXIC_SUBSTANCE	GO_CELLULAR_RESPONSE_TO_TOXIC_SUBSTANCE		17	-0.668661	-1.77413	0.0040568	0.0263372	0.975	1542	tags=41%, list=13%, signal=47%
GO_ENDOTHELIAL_CELL_MIGRATION	GO_ENDOTHELIAL_CELL_MIGRATION		30	-0.590068	-1.77265	0.00434783	0.0266099	0.975	625	tags=27%, list=5%, signal=28%
GO_REGULATION_OF_CARDIAC_MUSCLE_CONTRACTION	GO_REGULATION_OF_CARDIAC_MUSCLE_CONTRACTION		34	-0.568432	-1.77263	0	0.0264705	0.975	1438	tags=32%, list=12%, signal=37%
GO_NEGATIVE_REGULATION_OF_CYTOKINE_SECRETION	GO_NEGATIVE_REGULATION_OF_CYTOKINE_SECRETION		26	-0.617822	-1.76935	0	0.0272497	0.979	760	tags=38%, list=7%, signal=41%
GO_REGULATION_OF_TUMOR_NECROSIS_FACTOR_SUPERFAMILY_CYTOKINE_PRODUCTION	GO_REGULATION_OF_TUMOR_NECROSIS_FACTOR_SUPERFAMILY_CYTOKINE_PRODUCTION		68	-0.503371	-1.76877	0	0.0273216	0.98	1017	tags=28%, list=9%, signal=30%
GO_ER_ASSOCIATED_UBIQUITIN_DEPENDENT_PROTEIN_CATABOLIC_PROCESS	GO_ER_ASSOCIATED_UBIQUITIN_DEPENDENT_PROTEIN_CATABOLIC_PROCESS		58	-0.518126	-1.76876	0	0.0271807	0.98	1407	tags=29%, list=12%, signal=33%
GO_NEGATIVE_REGULATION_OF_SEQUENCE_SPECIFIC_DNA_BINDING_TRANSCRIPTION_FACTOR_ACTIVITY	GO_NEGATIVE_REGULATION_OF_SEQUENCE_SPECIFIC_DNA_BINDING_TRANSCRIPTION_FACTOR_ACTIVITY		87	-0.467402	-1.76813	0	0.0272308	0.981	1133	tags=26%, list=10%, signal=29%
GO_REGULATION_OF_PEPTIDE_SECRETION	GO_REGULATION_OF_PEPTIDE_SECRETION		103	-0.463984	-1.76718	0	0.0273404	0.983	1615	tags=26%, list=14%, signal=30%
GO_RESPONSE_TO_MINERALOCORTICOID	GO_RESPONSE_TO_MINERALOCORTICOID		21	-0.641013	-1.76699	0.002	0.0272554	0.983	936	tags=38%, list=8%, signal=41%
GO_ER_NUCLEUS_SIGNALING_PATHWAY	GO_ER_NUCLEUS_SIGNALING_PATHWAY		30	-0.5807	-1.76461	0.00212314	0.0278635	0.987	1384	tags=40%, list=12%, signal=45%
GO_PHOSPHOLIPASE_A2_ACTIVITY	GO_PHOSPHOLIPASE_A2_ACTIVITY		15	-0.706117	-1.76394	0.00428265	0.0279091	0.988	174	tags=20%, list=2%, signal=20%
GO_KERATAN_SULFATE_METABOLIC_PROCESS	GO_KERATAN_SULFATE_METABOLIC_PROCESS		18	-0.651732	-1.76357	0.00838574	0.0278756	0.988	1568	tags=56%, list=14%, signal=64%
GO_14_3_3_PROTEIN_BINDING	GO_14_3_3_PROTEIN_BINDING		15	-0.687111	-1.76294	0.00410678	0.0278743	0.988	802	tags=27%, list=7%, signal=29%
GO_ACUTE_PHASE_RESPONSE	GO_ACUTE_PHASE_RESPONSE		15	-0.689431	-1.76274	0.0105263	0.0277825	0.988	1489	tags=47%, list=13%, signal=53%
GO_OSTEOCLAST_DIFFERENTIATION	GO_OSTEOCLAST_DIFFERENTIATION		22	-0.640797	-1.76258	0	0.027704	0.988	1249	tags=36%, list=11%, signal=41%
GO_MYELOID_LEUKOCYTE_MEDIATED_IMMUNITY	GO_MYELOID_LEUKOCYTE_MEDIATED_IMMUNITY		28	-0.57951	-1.76228	0.0106157	0.0276708	0.988	1792	tags=29%, list=15%, signal=34%
GO_NEGATIVE_REGULATION_OF_T_CELL_PROLIFERATION	GO_NEGATIVE_REGULATION_OF_T_CELL_PROLIFERATION		41	-0.548588	-1.76222	0	0.0275813	0.988	1133	tags=29%, list=10%, signal=32%
GO_REGULATION_OF_SEQUESTERING_OF_CALCIUM_ION	GO_REGULATION_OF_SEQUESTERING_OF_CALCIUM_ION		62	-0.50458	-1.76104	0	0.0278139	0.988	2812	tags=42%, list=24%, signal=55%
GO_POSITIVE_REGULATION_OF_CELL_DIFFERENTIATION	GO_POSITIVE_REGULATION_OF_CELL_DIFFERENTIATION		451	-0.387389	-1.76096	0	0.0277046	0.988	2181	tags=30%, list=19%, signal=35%
GO_REGULATION_OF_RESPONSE_TO_CYTOKINE_STIMULUS	GO_REGULATION_OF_RESPONSE_TO_CYTOKINE_STIMULUS		103	-0.467477	-1.76065	0	0.0276667	0.989	1460	tags=27%, list=13%, signal=31%
GO_POSITIVE_REGULATION_OF_HORMONE_SECRETION	GO_POSITIVE_REGULATION_OF_HORMONE_SECRETION		58	-0.513882	-1.76012	0.00222222	0.0277359	0.99	2331	tags=40%, list=20%, signal=49%
GO_CHEMICAL_HOMEOSTASIS	GO_CHEMICAL_HOMEOSTASIS		452	-0.38769	-1.7596	0	0.0277925	0.99	1615	tags=21%, list=14%, signal=24%
GO_CELL_SURFACE	GO_CELL_SURFACE		362	-0.400034	-1.75914	0	0.0278289	0.99	2162	tags=30%, list=19%, signal=36%
GO_POSITIVE_REGULATION_OF_MAPK_CASCADE	GO_POSITIVE_REGULATION_OF_MAPK_CASCADE		286	-0.403528	-1.75842	0	0.0278907	0.99	1822	tags=26%, list=16%, signal=30%
GO_REGULATION_OF_TYROSINE_PHOSPHORYLATION_OF_STAT_PROTEIN	GO_REGULATION_OF_TYROSINE_PHOSPHORYLATION_OF_STAT_PROTEIN		43	-0.54356	-1.75828	0.00413223	0.0277972	0.99	1601	tags=37%, list=14%, signal=43%
GO_POSITIVE_REGULATION_OF_CHEMOTAXIS	GO_POSITIVE_REGULATION_OF_CHEMOTAXIS		62	-0.512072	-1.75698	0.00207469	0.0280609	0.99	2701	tags=48%, list=23%, signal=63%
GO_REGULATION_OF_CALCIUM_MEDIATED_SIGNALING	GO_REGULATION_OF_CALCIUM_MEDIATED_SIGNALING		40	-0.554114	-1.75694	0.004158	0.0279425	0.99	2279	tags=43%, list=20%, signal=53%
GO_POSITIVE_REGULATION_OF_STAT_CASCADE	GO_POSITIVE_REGULATION_OF_STAT_CASCADE		48	-0.521694	-1.75689	0.00207469	0.0278193	0.99	1850	tags=40%, list=16%, signal=47%
GO_POSITIVE_REGULATION_OF_OSTEOCLAST_DIFFERENTIATION	GO_POSITIVE_REGULATION_OF_OSTEOCLAST_DIFFERENTIATION		19	-0.644677	-1.75452	0.00422833	0.0284208	0.991	2181	tags=58%, list=19%, signal=71%
GO_KINASE_INHIBITOR_ACTIVITY	GO_KINASE_INHIBITOR_ACTIVITY		52	-0.521206	-1.75377	0	0.0284472	0.991	1273	tags=21%, list=11%, signal=24%
GO_PEPTIDYL_TYROSINE_AUTOPHOSPHORYLATION	GO_PEPTIDYL_TYROSINE_AUTOPHOSPHORYLATION		27	-0.59788	-1.75349	0.00421053	0.0284076	0.991	2226	tags=48%, list=19%, signal=59%
GO_RESPONSE_TO_TUMOR_NECROSIS_FACTOR	GO_RESPONSE_TO_TUMOR_NECROSIS_FACTOR		171	-0.425469	-1.75237	0	0.0286328	0.991	1754	tags=27%, list=15%, signal=31%
GO_POSITIVE_REGULATION_OF_LEUKOCYTE_CHEMOTAXIS	GO_POSITIVE_REGULATION_OF_LEUKOCYTE_CHEMOTAXIS		45	-0.528683	-1.75149	0	0.0288132	0.991	2701	tags=51%, list=23%, signal=66%
GO_NEGATIVE_REGULATION_OF_BLOOD_CIRCULATION	GO_NEGATIVE_REGULATION_OF_BLOOD_CIRCULATION		17	-0.656297	-1.74988	0.00831601	0.0292721	0.991	2059	tags=53%, list=18%, signal=64%
GO_POSITIVE_REGULATION_OF_TYROSINE_PHOSPHORYLATION_OF_STAT3_PROTEIN	GO_POSITIVE_REGULATION_OF_TYROSINE_PHOSPHORYLATION_OF_STAT3_PROTEIN		26	-0.600788	-1.74898	0.00409836	0.0294414	0.991	1601	tags=50%, list=14%, signal=58%
GO_REGULATION_OF_HORMONE_SECRETION	GO_REGULATION_OF_HORMONE_SECRETION		129	-0.448423	-1.74858	0	0.0294228	0.991	1615	tags=24%, list=14%, signal=28%
GO_REGULATION_OF_LYMPHOCYTE_MIGRATION	GO_REGULATION_OF_LYMPHOCYTE_MIGRATION		20	-0.64863	-1.74771	0.00213675	0.0296024	0.992	1822	tags=50%, list=16%, signal=59%
GO_CYTOKINE_BINDING	GO_CYTOKINE_BINDING		46	-0.526765	-1.74733	0	0.0295818	0.992	2283	tags=41%, list=20%, signal=51%
GO_ANTIGEN_PROCESSING_AND_PRESENTATION_OF_PEPTIDE_ANTIGEN_VIA_MHC_CLASS_I	GO_ANTIGEN_PROCESSING_AND_PRESENTATION_OF_PEPTIDE_ANTIGEN_VIA_MHC_CLASS_I		81	-0.476081	-1.74525	0	0.0301016	0.994	1216	tags=26%, list=11%, signal=29%
GO_REGULATION_OF_INTERLEUKIN_1_PRODUCTION	GO_REGULATION_OF_INTERLEUKIN_1_PRODUCTION		39	-0.543604	-1.74501	0.00421053	0.0300445	0.994	2369	tags=44%, list=20%, signal=55%
GO_NEGATIVE_REGULATION_OF_SIGNAL_TRANSDUCTION_IN_ABSENCE_OF_LIGAND	GO_NEGATIVE_REGULATION_OF_SIGNAL_TRANSDUCTION_IN_ABSENCE_OF_LIGAND		19	-0.642073	-1.7447	0.00623701	0.0300058	0.994	1765	tags=47%, list=15%, signal=56%
GO_ENDOPLASMIC_RETICULUM_CALCIUM_ION_HOMEOSTASIS	GO_ENDOPLASMIC_RETICULUM_CALCIUM_ION_HOMEOSTASIS		20	-0.630354	-1.74391	0.00604839	0.0300653	0.994	1002	tags=35%, list=9%, signal=38%
GO_RESPONSE_TO_CORTICOSTEROID	GO_RESPONSE_TO_CORTICOSTEROID		104	-0.455197	-1.74291	0	0.0302439	0.994	1002	tags=22%, list=9%, signal=24%
GO_POSITIVE_REGULATION_OF_RESPONSE_TO_CYTOKINE_STIMULUS	GO_POSITIVE_REGULATION_OF_RESPONSE_TO_CYTOKINE_STIMULUS		26	-0.5998	-1.74144	0.00622407	0.0305438	0.995	2379	tags=50%, list=21%, signal=63%
GO_PROTEIN_DESTABILIZATION	GO_PROTEIN_DESTABILIZATION		27	-0.596735	-1.74083	0.00793651	0.0306328	0.995	584	tags=22%, list=5%, signal=23%
GO_ANTIGEN_PROCESSING_AND_PRESENTATION_OF_ENDOGENOUS_ANTIGEN	GO_ANTIGEN_PROCESSING_AND_PRESENTATION_OF_ENDOGENOUS_ANTIGEN		15	-0.69385	-1.73985	0.010661	0.0308007	0.995	2045	tags=67%, list=18%, signal=81%
GO_REGULATION_OF_CELL_ADHESION	GO_REGULATION_OF_CELL_ADHESION		405	-0.387135	-1.73944	0	0.0307651	0.996	2336	tags=30%, list=20%, signal=36%
GO_POSITIVE_REGULATION_OF_EPITHELIAL_CELL_MIGRATION	GO_POSITIVE_REGULATION_OF_EPITHELIAL_CELL_MIGRATION		62	-0.497907	-1.73774	0.00208333	0.0312276	0.996	2225	tags=39%, list=19%, signal=48%
GO_ADENYLYLTRANSFERASE_ACTIVITY	GO_ADENYLYLTRANSFERASE_ACTIVITY		21	-0.628753	-1.73597	0.00826446	0.0316694	0.998	1178	tags=38%, list=10%, signal=42%
GO_NEGATIVE_REGULATION_OF_CELL_CELL_ADHESION	GO_NEGATIVE_REGULATION_OF_CELL_CELL_ADHESION		94	-0.461998	-1.73556	0.00209644	0.0316637	0.998	1133	tags=24%, list=10%, signal=27%
GO_REGULATION_OF_CELL_ACTIVATION	GO_REGULATION_OF_CELL_ACTIVATION		316	-0.393145	-1.73267	0	0.032441	1	2331	tags=33%, list=20%, signal=40%
GO_MYELOID_CELL_ACTIVATION_INVOLVED_IN_IMMUNE_RESPONSE	GO_MYELOID_CELL_ACTIVATION_INVOLVED_IN_IMMUNE_RESPONSE		31	-0.571532	-1.73164	0	0.0326743	1	1792	tags=26%, list=15%, signal=30%
GO_REGULATION_OF_PEPTIDE_TRANSPORT	GO_REGULATION_OF_PEPTIDE_TRANSPORT		135	-0.435902	-1.73134	0	0.0326643	1	1615	tags=26%, list=14%, signal=30%
GO_ION_HOMEOSTASIS	GO_ION_HOMEOSTASIS		290	-0.399234	-1.73054	0	0.0327472	1	1476	tags=21%, list=13%, signal=24%
GO_REGULATION_OF_SYSTEM_PROCESS	GO_REGULATION_OF_SYSTEM_PROCESS		224	-0.410647	-1.72917	0	0.033013	1	1543	tags=25%, list=13%, signal=28%
GO_COATED_VESICLE_MEMBRANE	GO_COATED_VESICLE_MEMBRANE		101	-0.453129	-1.72839	0	0.0331639	1	2328	tags=35%, list=20%, signal=43%
GO_CALCIUM_MEDIATED_SIGNALING	GO_CALCIUM_MEDIATED_SIGNALING		46	-0.518527	-1.72825	0.00391389	0.0330771	1	1738	tags=33%, list=15%, signal=38%
GO_ATPASE_ACTIVITY_COUPLED_TO_TRANSMEMBRANE_MOVEMENT_OF_IONS_PHOSPHORYLATIVE_MECHANISM	GO_ATPASE_ACTIVITY_COUPLED_TO_TRANSMEMBRANE_MOVEMENT_OF_IONS_PHOSPHORYLATIVE_MECHANISM		21	-0.639286	-1.7279	0.004	0.033066	1	2596	tags=62%, list=22%, signal=80%
GO_LEUKOCYTE_ACTIVATION	GO_LEUKOCYTE_ACTIVATION		288	-0.394817	-1.72636	0	0.0334866	1	2083	tags=29%, list=18%, signal=34%
GO_REGULATION_OF_CARDIAC_CONDUCTION	GO_REGULATION_OF_CARDIAC_CONDUCTION		27	-0.596839	-1.72626	0.00414938	0.0333784	1	2145	tags=44%, list=19%, signal=54%
GO_SKELETAL_MUSCLE_CELL_DIFFERENTIATION	GO_SKELETAL_MUSCLE_CELL_DIFFERENTIATION		27	-0.592739	-1.72588	0.0107296	0.0333823	1	1038	tags=30%, list=9%, signal=32%
GO_RESPONSE_TO_BACTERIUM	GO_RESPONSE_TO_BACTERIUM		275	-0.400275	-1.72583	0	0.0332696	1	1133	tags=23%, list=10%, signal=25%
GO_SH2_DOMAIN_BINDING	GO_SH2_DOMAIN_BINDING		21	-0.632944	-1.72506	0.00785855	0.0333833	1	2083	tags=52%, list=18%, signal=64%
GO_TRANSPORT_VESICLE_MEMBRANE	GO_TRANSPORT_VESICLE_MEMBRANE		91	-0.458736	-1.72305	0.00226244	0.0339248	1	2405	tags=36%, list=21%, signal=45%
GO_REGULATION_OF_SENSORY_PERCEPTION	GO_REGULATION_OF_SENSORY_PERCEPTION		15	-0.671076	-1.72262	0.010917	0.0338952	1	760	tags=27%, list=7%, signal=29%
GO_REGULATION_OF_LEUKOCYTE_MIGRATION	GO_REGULATION_OF_LEUKOCYTE_MIGRATION		82	-0.473404	-1.72063	0.0021322	0.0345037	1	1822	tags=30%, list=16%, signal=36%
GO_RNA_POLYMERASE_II_CORE_PROMOTER_SEQUENCE_SPECIFIC_DNA_BINDING	GO_RNA_POLYMERASE_II_CORE_PROMOTER_SEQUENCE_SPECIFIC_DNA_BINDING		34	-0.562618	-1.72054	0.002079	0.0343995	1	558	tags=21%, list=5%, signal=22%
GO_NEGATIVE_REGULATION_OF_TRANSPORT	GO_NEGATIVE_REGULATION_OF_TRANSPORT		261	-0.396754	-1.71958	0	0.0345431	1	1414	tags=21%, list=12%, signal=23%
GO_POSITIVE_REGULATION_OF_INTERFERON_GAMMA_PRODUCTION	GO_POSITIVE_REGULATION_OF_INTERFERON_GAMMA_PRODUCTION		46	-0.525873	-1.71837	0.00207469	0.0347835	1	1349	tags=33%, list=12%, signal=37%
GO_REGULATION_OF_INTERLEUKIN_6_PRODUCTION	GO_REGULATION_OF_INTERLEUKIN_6_PRODUCTION		67	-0.486436	-1.71675	0	0.0352921	1	1017	tags=27%, list=9%, signal=29%
GO_REGULATION_OF_LEUKOCYTE_CHEMOTAXIS	GO_REGULATION_OF_LEUKOCYTE_CHEMOTAXIS		51	-0.5019	-1.7167	0.00203252	0.035166	1	1822	tags=37%, list=16%, signal=44%
GO_REGULATION_OF_LIPID_METABOLIC_PROCESS	GO_REGULATION_OF_LIPID_METABOLIC_PROCESS		168	-0.422346	-1.71511	0	0.0355842	1	1262	tags=21%, list=11%, signal=23%
GO_RESPONSE_TO_CAMP	GO_RESPONSE_TO_CAMP		51	-0.508965	-1.71269	0	0.0363415	1	2181	tags=43%, list=19%, signal=53%
GO_REGULATION_OF_IMMUNOGLOBULIN_PRODUCTION	GO_REGULATION_OF_IMMUNOGLOBULIN_PRODUCTION		34	-0.552537	-1.71193	0	0.0365301	1	760	tags=29%, list=7%, signal=31%
GO_SARCOPLASMIC_RETICULUM_MEMBRANE	GO_SARCOPLASMIC_RETICULUM_MEMBRANE		18	-0.641033	-1.71123	0.00420168	0.0366614	1	2145	tags=56%, list=19%, signal=68%
GO_CELL_REDOX_HOMEOSTASIS	GO_CELL_REDOX_HOMEOSTASIS		47	-0.513618	-1.70929	0.0100604	0.0372872	1	1508	tags=30%, list=13%, signal=34%
GO_REGULATION_OF_INTERLEUKIN_1_SECRETION	GO_REGULATION_OF_INTERLEUKIN_1_SECRETION		22	-0.622187	-1.70871	0.00965251	0.0373754	1	2369	tags=55%, list=20%, signal=68%
GO_TRANSCRIPTIONAL_ACTIVATOR_ACTIVITY_RNA_POLYMERASE_II_TRANSCRIPTION_REGULATORY_REGION_SEQUENCE_SPECIFIC_BINDING	GO_TRANSCRIPTIONAL_ACTIVATOR_ACTIVITY_RNA_POLYMERASE_II_TRANSCRIPTION_REGULATORY_REGION_SEQUENCE_SPECIFIC_BINDING		154	-0.424864	-1.70652	0	0.0379955	1	1184	tags=19%, list=10%, signal=21%
GO_NEGATIVE_REGULATION_OF_LEUKOCYTE_PROLIFERATION	GO_NEGATIVE_REGULATION_OF_LEUKOCYTE_PROLIFERATION		52	-0.510509	-1.7061	0.00211416	0.0379968	1	1133	tags=25%, list=10%, signal=28%
GO_CALCIUM_CHANNEL_COMPLEX	GO_CALCIUM_CHANNEL_COMPLEX		20	-0.623304	-1.70471	0.00659341	0.0383553	1	818	tags=25%, list=7%, signal=27%
GO_NAD_ADP_RIBOSYLTRANSFERASE_ACTIVITY	GO_NAD_ADP_RIBOSYLTRANSFERASE_ACTIVITY		22	-0.596344	-1.70402	0.00618557	0.0384581	1	1316	tags=41%, list=11%, signal=46%
GO_LIPID_HOMEOSTASIS	GO_LIPID_HOMEOSTASIS		63	-0.489208	-1.70389	0.00213675	0.0383547	1	964	tags=22%, list=8%, signal=24%
GO_T_CELL_DIFFERENTIATION	GO_T_CELL_DIFFERENTIATION		84	-0.468442	-1.70166	0.00430108	0.0390352	1	759	tags=19%, list=7%, signal=20%
GO_TRANSCRIPTIONAL_ACTIVATOR_ACTIVITY_RNA_POLYMERASE_II_CORE_PROMOTER_PROXIMAL_REGION_SEQUENCE_SPECIFIC_BINDING	GO_TRANSCRIPTIONAL_ACTIVATOR_ACTIVITY_RNA_POLYMERASE_II_CORE_PROMOTER_PROXIMAL_REGION_SEQUENCE_SPECIFIC_BINDING		108	-0.443661	-1.70155	0	0.0389262	1	1184	tags=18%, list=10%, signal=19%
GO_DEFENSE_RESPONSE_TO_GRAM_NEGATIVE_BACTERIUM	GO_DEFENSE_RESPONSE_TO_GRAM_NEGATIVE_BACTERIUM		17	-0.668857	-1.70102	0.0045045	0.0389382	1	530	tags=29%, list=5%, signal=31%
GO_REGULATION_OF_EPITHELIAL_CELL_PROLIFERATION	GO_REGULATION_OF_EPITHELIAL_CELL_PROLIFERATION		148	-0.421848	-1.69716	0	0.0404667	1	1601	tags=24%, list=14%, signal=27%
GO_REGULATION_OF_NATURAL_KILLER_CELL_MEDIATED_IMMUNITY	GO_REGULATION_OF_NATURAL_KILLER_CELL_MEDIATED_IMMUNITY		25	-0.596664	-1.69714	0.0114504	0.0403245	1	1543	tags=44%, list=13%, signal=51%
GO_CELLULAR_RESPONSE_TO_CARBOHYDRATE_STIMULUS	GO_CELLULAR_RESPONSE_TO_CARBOHYDRATE_STIMULUS		46	-0.508516	-1.69498	0.00207469	0.041073	1	983	tags=26%, list=8%, signal=28%
GO_REGULATION_OF_INTERLEUKIN_10_PRODUCTION	GO_REGULATION_OF_INTERLEUKIN_10_PRODUCTION		36	-0.547079	-1.69469	0	0.0410158	1	2328	tags=47%, list=20%, signal=59%
GO_REGULATION_OF_BONE_REMODELING	GO_REGULATION_OF_BONE_REMODELING		25	-0.583087	-1.69417	0.00821355	0.041077	1	2181	tags=44%, list=19%, signal=54%
GO_POSITIVE_REGULATION_OF_INTERLEUKIN_6_PRODUCTION	GO_POSITIVE_REGULATION_OF_INTERLEUKIN_6_PRODUCTION		42	-0.526411	-1.69334	0.00204499	0.0412784	1	727	tags=26%, list=6%, signal=28%
GO_NEGATIVE_REGULATION_OF_VIRAL_PROCESS	GO_NEGATIVE_REGULATION_OF_VIRAL_PROCESS		65	-0.481374	-1.69234	0	0.0414704	1	1791	tags=32%, list=15%, signal=38%
GO_POSITIVE_REGULATION_OF_AXONOGENESIS	GO_POSITIVE_REGULATION_OF_AXONOGENESIS		40	-0.531676	-1.69147	0.00622407	0.041623	1	2230	tags=43%, list=19%, signal=52%
GO_RNA_POLYMERASE_II_TRANSCRIPTION_FACTOR_ACTIVITY_SEQUENCE_SPECIFIC_DNA_BINDING	GO_RNA_POLYMERASE_II_TRANSCRIPTION_FACTOR_ACTIVITY_SEQUENCE_SPECIFIC_DNA_BINDING		327	-0.382236	-1.69057	0	0.0418296	1	1615	tags=23%, list=14%, signal=26%
GO_INACTIVATION_OF_MAPK_ACTIVITY	GO_INACTIVATION_OF_MAPK_ACTIVITY		21	-0.607099	-1.69019	0.00998004	0.0417889	1	930	tags=38%, list=8%, signal=41%
GO_REGULATION_OF_VASCULAR_ENDOTHELIAL_GROWTH_FACTOR_RECEPTOR_SIGNALING_PATHWAY	GO_REGULATION_OF_VASCULAR_ENDOTHELIAL_GROWTH_FACTOR_RECEPTOR_SIGNALING_PATHWAY		15	-0.659596	-1.68995	0.0145833	0.0417158	1	1601	tags=33%, list=14%, signal=39%
GO_MAST_CELL_ACTIVATION	GO_MAST_CELL_ACTIVATION		15	-0.660778	-1.68986	0.0174673	0.0415973	1	1792	tags=33%, list=15%, signal=39%
GO_REGULATION_OF_MAPK_CASCADE	GO_REGULATION_OF_MAPK_CASCADE		404	-0.376865	-1.68827	0	0.0421428	1	1822	tags=24%, list=16%, signal=27%
GO_REGULATION_OF_ION_HOMEOSTASIS	GO_REGULATION_OF_ION_HOMEOSTASIS		105	-0.443099	-1.68814	0	0.0420648	1	1941	tags=28%, list=17%, signal=33%
GO_NEGATIVE_REGULATION_OF_CELL_PROJECTION_ORGANIZATION	GO_NEGATIVE_REGULATION_OF_CELL_PROJECTION_ORGANIZATION		78	-0.468021	-1.68691	0.00401606	0.0423952	1	1679	tags=28%, list=15%, signal=33%
GO_HETEROTYPIC_CELL_CELL_ADHESION	GO_HETEROTYPIC_CELL_CELL_ADHESION		17	-0.658713	-1.6869	0.0131004	0.0422577	1	988	tags=41%, list=9%, signal=45%
GO_NEGATIVE_REGULATION_OF_LYMPHOCYTE_MEDIATED_IMMUNITY	GO_NEGATIVE_REGULATION_OF_LYMPHOCYTE_MEDIATED_IMMUNITY		26	-0.580349	-1.68561	0.0127119	0.0425579	1	1017	tags=35%, list=9%, signal=38%
GO_ANTIGEN_PROCESSING_AND_PRESENTATION	GO_ANTIGEN_PROCESSING_AND_PRESENTATION		172	-0.413597	-1.68531	0	0.0425605	1	1216	tags=21%, list=11%, signal=23%
GO_LYMPHOCYTE_DIFFERENTIATION	GO_LYMPHOCYTE_DIFFERENTIATION		138	-0.421474	-1.68458	0	0.0427043	1	1566	tags=25%, list=14%, signal=29%
GO_POSITIVE_REGULATION_OF_SECRETION	GO_POSITIVE_REGULATION_OF_SECRETION		203	-0.403185	-1.68369	0	0.0429324	1	2425	tags=33%, list=21%, signal=41%
GO_REGULATION_OF_INTRINSIC_APOPTOTIC_SIGNALING_PATHWAY	GO_REGULATION_OF_INTRINSIC_APOPTOTIC_SIGNALING_PATHWAY		116	-0.440759	-1.68364	0.00647948	0.0427999	1	1645	tags=27%, list=14%, signal=31%
GO_REGULATION_OF_ERAD_PATHWAY	GO_REGULATION_OF_ERAD_PATHWAY		24	-0.591404	-1.68318	0.00849257	0.0428738	1	706	tags=29%, list=6%, signal=31%
GO_NEGATIVE_REGULATION_OF_CYTOKINE_PRODUCTION	GO_NEGATIVE_REGULATION_OF_CYTOKINE_PRODUCTION		139	-0.425529	-1.68318	0	0.0427333	1	1066	tags=22%, list=9%, signal=23%
GO_GROWTH_FACTOR_RECEPTOR_BINDING	GO_GROWTH_FACTOR_RECEPTOR_BINDING		66	-0.472443	-1.68292	0.0020284	0.0427087	1	2388	tags=36%, list=21%, signal=46%
GO_CYCLIC_NUCLEOTIDE_MEDIATED_SIGNALING	GO_CYCLIC_NUCLEOTIDE_MEDIATED_SIGNALING		20	-0.6024	-1.67896	0.0105932	0.0442621	1	2235	tags=40%, list=19%, signal=49%
GO_NEUROMUSCULAR_JUNCTION	GO_NEUROMUSCULAR_JUNCTION		26	-0.576846	-1.67827	0.00613497	0.0444317	1	2348	tags=42%, list=20%, signal=53%
GO_POSITIVE_REGULATION_OF_LYMPHOCYTE_MIGRATION	GO_POSITIVE_REGULATION_OF_LYMPHOCYTE_MIGRATION		16	-0.65329	-1.67803	0.0102881	0.0443935	1	1822	tags=56%, list=16%, signal=67%
GO_CELLULAR_HOMEOSTASIS	GO_CELLULAR_HOMEOSTASIS		353	-0.383105	-1.67754	0	0.0444431	1	1551	tags=23%, list=13%, signal=25%
GO_REGULATION_OF_CALCIUM_ION_TRANSPORT	GO_REGULATION_OF_CALCIUM_ION_TRANSPORT		104	-0.436309	-1.67732	0	0.0443838	1	2299	tags=34%, list=20%, signal=42%
GO_ALPHA_BETA_T_CELL_DIFFERENTIATION	GO_ALPHA_BETA_T_CELL_DIFFERENTIATION		34	-0.547086	-1.67683	0.0107527	0.0443939	1	530	tags=24%, list=5%, signal=25%
GO_REGULATION_OF_ANTIGEN_PROCESSING_AND_PRESENTATION	GO_REGULATION_OF_ANTIGEN_PROCESSING_AND_PRESENTATION		15	-0.662548	-1.67624	0.0167015	0.0444866	1	1349	tags=53%, list=12%, signal=60%
GO_REGULATION_OF_ACTIVATED_T_CELL_PROLIFERATION	GO_REGULATION_OF_ACTIVATED_T_CELL_PROLIFERATION		27	-0.560482	-1.67601	0.00821355	0.0444272	1	1646	tags=37%, list=14%, signal=43%
GO_MYELOID_LEUKOCYTE_ACTIVATION	GO_MYELOID_LEUKOCYTE_ACTIVATION		65	-0.47657	-1.67278	0	0.0457226	1	1819	tags=25%, list=16%, signal=29%
GO_CELL_ACTIVATION	GO_CELL_ACTIVATION		376	-0.373552	-1.67163	0	0.0460082	1	2083	tags=28%, list=18%, signal=33%
GO_REGULATION_OF_OSTEOCLAST_DIFFERENTIATION	GO_REGULATION_OF_OSTEOCLAST_DIFFERENTIATION		42	-0.512882	-1.67092	0.00213675	0.0461411	1	2181	tags=43%, list=19%, signal=53%
GO_POSITIVE_REGULATION_OF_TRANSCRIPTION_FACTOR_IMPORT_INTO_NUCLEUS	GO_POSITIVE_REGULATION_OF_TRANSCRIPTION_FACTOR_IMPORT_INTO_NUCLEUS		35	-0.538039	-1.67079	0.00856531	0.0460299	1	1017	tags=26%, list=9%, signal=28%
GO_NEGATIVE_REGULATION_OF_CALCIUM_ION_TRANSMEMBRANE_TRANSPORT	GO_NEGATIVE_REGULATION_OF_CALCIUM_ION_TRANSMEMBRANE_TRANSPORT		15	-0.656438	-1.6701	0.0131868	0.0460871	1	585	tags=27%, list=5%, signal=28%
GO_REGULATION_OF_INTERLEUKIN_1_BETA_PRODUCTION	GO_REGULATION_OF_INTERLEUKIN_1_BETA_PRODUCTION		32	-0.556948	-1.66988	0.00209205	0.0460493	1	2369	tags=44%, list=20%, signal=55%
GO_CELLULAR_RESPONSE_TO_VASCULAR_ENDOTHELIAL_GROWTH_FACTOR_STIMULUS	GO_CELLULAR_RESPONSE_TO_VASCULAR_ENDOTHELIAL_GROWTH_FACTOR_STIMULUS		16	-0.647346	-1.66981	0.0155556	0.0459271	1	1601	tags=44%, list=14%, signal=51%
GO_NEGATIVE_REGULATION_OF_CELL_ADHESION	GO_NEGATIVE_REGULATION_OF_CELL_ADHESION		150	-0.417313	-1.66973	0.00210084	0.0458101	1	1461	tags=23%, list=13%, signal=26%
GO_POSITIVE_REGULATION_OF_ALPHA_BETA_T_CELL_DIFFERENTIATION	GO_POSITIVE_REGULATION_OF_ALPHA_BETA_T_CELL_DIFFERENTIATION		28	-0.566745	-1.66783	0.00623701	0.0465795	1	1017	tags=29%, list=9%, signal=31%
GO_POSITIVE_REGULATION_OF_ENDOTHELIAL_CELL_PROLIFERATION	GO_POSITIVE_REGULATION_OF_ENDOTHELIAL_CELL_PROLIFERATION		36	-0.538213	-1.66563	0.00203252	0.0473701	1	1601	tags=33%, list=14%, signal=39%
GO_SKELETAL_MUSCLE_ORGAN_DEVELOPMENT	GO_SKELETAL_MUSCLE_ORGAN_DEVELOPMENT		66	-0.469024	-1.66466	0.00398406	0.0476495	1	1753	tags=30%, list=15%, signal=36%
GO_POSITIVE_REGULATION_OF_IMMUNOGLOBULIN_PRODUCTION	GO_POSITIVE_REGULATION_OF_IMMUNOGLOBULIN_PRODUCTION		22	-0.592906	-1.66292	0.0226804	0.048315	1	604	tags=32%, list=5%, signal=34%
GO_REGULATION_OF_TRANSPORTER_ACTIVITY	GO_REGULATION_OF_TRANSPORTER_ACTIVITY		95	-0.441284	-1.66146	0.00428265	0.0488816	1	1862	tags=27%, list=16%, signal=32%
GO_POSITIVE_REGULATION_OF_MYELOID_LEUKOCYTE_DIFFERENTIATION	GO_POSITIVE_REGULATION_OF_MYELOID_LEUKOCYTE_DIFFERENTIATION		36	-0.522768	-1.66143	0.010395	0.0487448	1	1156	tags=28%, list=10%, signal=31%
GO_REGULATION_OF_HEMOPOIESIS	GO_REGULATION_OF_HEMOPOIESIS		215	-0.397593	-1.65904	0	0.0497331	1	1017	tags=21%, list=9%, signal=23%
GO_NEGATIVE_REGULATION_OF_CALCIUM_ION_TRANSPORT	GO_NEGATIVE_REGULATION_OF_CALCIUM_ION_TRANSPORT		24	-0.595072	-1.65882	0.00831601	0.0496564	1	1002	tags=29%, list=9%, signal=32%
GO_PROTEIN_SERINE_THREONINE_KINASE_INHIBITOR_ACTIVITY	GO_PROTEIN_SERINE_THREONINE_KINASE_INHIBITOR_ACTIVITY		25	-0.565253	-1.65735	0.00842105	0.05024	1	1033	tags=20%, list=9%, signal=22%
GO_POSITIVE_REGULATION_OF_VASCULATURE_DEVELOPMENT	GO_POSITIVE_REGULATION_OF_VASCULATURE_DEVELOPMENT		71	-0.463632	-1.6572	0.00596422	0.0501829	1	1822	tags=32%, list=16%, signal=38%
GO_REGULATION_OF_ALPHA_BETA_T_CELL_DIFFERENTIATION	GO_REGULATION_OF_ALPHA_BETA_T_CELL_DIFFERENTIATION		32	-0.543339	-1.65619	0.01222	0.050556	1	2369	tags=44%, list=20%, signal=55%
GO_REGULATION_OF_B_CELL_PROLIFERATION	GO_REGULATION_OF_B_CELL_PROLIFERATION		43	-0.511194	-1.65584	0.0124481	0.0505057	1	2214	tags=44%, list=19%, signal=54%
GO_MHC_CLASS_I_PROTEIN_BINDING	GO_MHC_CLASS_I_PROTEIN_BINDING		15	-0.65655	-1.65573	0.0121212	0.0503992	1	769	tags=33%, list=7%, signal=36%
GO_NEGATIVE_REGULATION_OF_OSTEOBLAST_DIFFERENTIATION	GO_NEGATIVE_REGULATION_OF_OSTEOBLAST_DIFFERENTIATION		18	-0.627995	-1.6538	0.0109409	0.0511875	1	1003	tags=22%, list=9%, signal=24%
GO_REGULATION_OF_CYTOKINE_PRODUCTION_INVOLVED_IN_IMMUNE_RESPONSE	GO_REGULATION_OF_CYTOKINE_PRODUCTION_INVOLVED_IN_IMMUNE_RESPONSE		37	-0.528766	-1.6534	0.0150538	0.0512491	1	2136	tags=49%, list=18%, signal=59%
GO_SUPEROXIDE_METABOLIC_PROCESS	GO_SUPEROXIDE_METABOLIC_PROCESS		17	-0.630301	-1.65119	0.0196078	0.0520256	1	1045	tags=29%, list=9%, signal=32%
GO_POSITIVE_REGULATION_OF_SEQUENCE_SPECIFIC_DNA_BINDING_TRANSCRIPTION_FACTOR_ACTIVITY	GO_POSITIVE_REGULATION_OF_SEQUENCE_SPECIFIC_DNA_BINDING_TRANSCRIPTION_FACTOR_ACTIVITY		155	-0.41325	-1.65015	0	0.0524099	1	1766	tags=24%, list=15%, signal=28%
GO_NEGATIVE_REGULATION_OF_IMMUNE_EFFECTOR_PROCESS	GO_NEGATIVE_REGULATION_OF_IMMUNE_EFFECTOR_PROCESS		65	-0.469215	-1.65001	0.00208333	0.0523232	1	767	tags=23%, list=7%, signal=25%
GO_CARBOHYDRATE_TRANSPORT	GO_CARBOHYDRATE_TRANSPORT		48	-0.493968	-1.64871	0.00215517	0.0527408	1	2466	tags=48%, list=21%, signal=61%
GO_DEFENSE_RESPONSE_TO_BACTERIUM	GO_DEFENSE_RESPONSE_TO_BACTERIUM		87	-0.440874	-1.64763	0	0.0532086	1	916	tags=26%, list=8%, signal=28%
GO_REGULATION_OF_CALCIUM_ION_TRANSMEMBRANE_TRANSPORTER_ACTIVITY	GO_REGULATION_OF_CALCIUM_ION_TRANSMEMBRANE_TRANSPORTER_ACTIVITY		38	-0.523675	-1.64653	0.0126582	0.0535509	1	2446	tags=39%, list=21%, signal=50%
GO_NEGATIVE_REGULATION_OF_KINASE_ACTIVITY	GO_NEGATIVE_REGULATION_OF_KINASE_ACTIVITY		163	-0.401428	-1.6461	0	0.0535884	1	1349	tags=21%, list=12%, signal=23%
GO_NEGATIVE_REGULATION_OF_VIRAL_GENOME_REPLICATION	GO_NEGATIVE_REGULATION_OF_VIRAL_GENOME_REPLICATION		40	-0.516483	-1.64396	0.00816326	0.0544558	1	1791	tags=38%, list=15%, signal=44%
GO_POSITIVE_REGULATION_OF_LIPID_KINASE_ACTIVITY	GO_POSITIVE_REGULATION_OF_LIPID_KINASE_ACTIVITY		19	-0.614016	-1.64247	0.0147992	0.0550101	1	1222	tags=37%, list=11%, signal=41%
GO_REGULATION_OF_MYELOID_LEUKOCYTE_DIFFERENTIATION	GO_REGULATION_OF_MYELOID_LEUKOCYTE_DIFFERENTIATION		70	-0.461711	-1.64222	0	0.0549681	1	2257	tags=37%, list=19%, signal=46%
GO_ADAPTIVE_IMMUNE_RESPONSE	GO_ADAPTIVE_IMMUNE_RESPONSE		166	-0.40276	-1.64124	0	0.05525	1	2352	tags=36%, list=20%, signal=45%
GO_POSITIVE_REGULATION_OF_B_CELL_ACTIVATION	GO_POSITIVE_REGULATION_OF_B_CELL_ACTIVATION		53	-0.490705	-1.64111	0.00208768	0.0551611	1	2214	tags=45%, list=19%, signal=56%
GO_POSITIVE_REGULATION_OF_CELL_PROLIFERATION	GO_POSITIVE_REGULATION_OF_CELL_PROLIFERATION		444	-0.361684	-1.64099	0	0.0550731	1	1822	tags=24%, list=16%, signal=27%
GO_REGULATION_OF_I_KAPPAB_KINASE_NF_KAPPAB_SIGNALING	GO_REGULATION_OF_I_KAPPAB_KINASE_NF_KAPPAB_SIGNALING		180	-0.400597	-1.64088	0	0.0549661	1	2078	tags=27%, list=18%, signal=32%
GO_REGULATION_OF_CYTOSOLIC_CALCIUM_ION_CONCENTRATION	GO_REGULATION_OF_CYTOSOLIC_CALCIUM_ION_CONCENTRATION		87	-0.447034	-1.63913	0.00217865	0.0556429	1	1985	tags=32%, list=17%, signal=39%
GO_SULFUR_COMPOUND_BIOSYNTHETIC_PROCESS	GO_SULFUR_COMPOUND_BIOSYNTHETIC_PROCESS		128	-0.412102	-1.63804	0	0.0559953	1	1695	tags=26%, list=15%, signal=30%
GO_SARCOPLASM	GO_SARCOPLASM		34	-0.534686	-1.63748	0.0229645	0.0561542	1	2145	tags=38%, list=19%, signal=47%
GO_POSITIVE_REGULATION_OF_INNATE_IMMUNE_RESPONSE	GO_POSITIVE_REGULATION_OF_INNATE_IMMUNE_RESPONSE		198	-0.393504	-1.63739	0.00203666	0.0560381	1	1791	tags=27%, list=15%, signal=31%
GO_COATED_VESICLE	GO_COATED_VESICLE		167	-0.398992	-1.63524	0	0.0569704	1	1918	tags=27%, list=17%, signal=32%
GO_REGULATION_OF_AXON_GUIDANCE	GO_REGULATION_OF_AXON_GUIDANCE		21	-0.598781	-1.63383	0.01875	0.0575044	1	3172	tags=67%, list=27%, signal=92%
GO_PROTEIN_TYROSINE_KINASE_ACTIVITY	GO_PROTEIN_TYROSINE_KINASE_ACTIVITY		99	-0.434967	-1.63235	0	0.0581366	1	2226	tags=34%, list=19%, signal=42%
GO_REGULATION_OF_CD4_POSITIVE_ALPHA_BETA_T_CELL_ACTIVATION	GO_REGULATION_OF_CD4_POSITIVE_ALPHA_BETA_T_CELL_ACTIVATION		28	-0.557456	-1.63077	0.0255319	0.0587622	1	2369	tags=46%, list=20%, signal=58%
GO_REGULATION_OF_HEART_RATE	GO_REGULATION_OF_HEART_RATE		30	-0.53646	-1.63063	0.0128755	0.0586703	1	1833	tags=30%, list=16%, signal=36%
GO_POSITIVE_REGULATION_OF_REACTIVE_OXYGEN_SPECIES_METABOLIC_PROCESS	GO_POSITIVE_REGULATION_OF_REACTIVE_OXYGEN_SPECIES_METABOLIC_PROCESS		51	-0.488791	-1.62893	0.00421053	0.059346	1	1095	tags=24%, list=9%, signal=26%
GO_RESPONSE_TO_PURINE_CONTAINING_COMPOUND	GO_RESPONSE_TO_PURINE_CONTAINING_COMPOUND		86	-0.440215	-1.62847	0.00208333	0.0594283	1	2235	tags=36%, list=19%, signal=44%
GO_POSITIVE_REGULATION_OF_INSULIN_SECRETION	GO_POSITIVE_REGULATION_OF_INSULIN_SECRETION		37	-0.528463	-1.62773	0.0106157	0.0596631	1	1861	tags=38%, list=16%, signal=45%
GO_IMMUNE_EFFECTOR_PROCESS	GO_IMMUNE_EFFECTOR_PROCESS		319	-0.370314	-1.6271	0	0.0598076	1	2369	tags=32%, list=20%, signal=39%
GO_CELLULAR_RESPONSE_TO_DRUG	GO_CELLULAR_RESPONSE_TO_DRUG		42	-0.499668	-1.62531	0.0101833	0.0604679	1	1542	tags=29%, list=13%, signal=33%
GO_REGULATION_OF_B_CELL_MEDIATED_IMMUNITY	GO_REGULATION_OF_B_CELL_MEDIATED_IMMUNITY		28	-0.550915	-1.62381	0.0126316	0.0611042	1	760	tags=25%, list=7%, signal=27%
GO_METAL_ION_TRANSPORT	GO_METAL_ION_TRANSPORT		261	-0.374627	-1.62303	0	0.0613491	1	1453	tags=19%, list=13%, signal=21%
GO_ANTIGEN_PROCESSING_AND_PRESENTATION_OF_PEPTIDE_ANTIGEN	GO_ANTIGEN_PROCESSING_AND_PRESENTATION_OF_PEPTIDE_ANTIGEN		146	-0.407496	-1.62275	0	0.0613174	1	1216	tags=22%, list=11%, signal=24%
GO_DIVALENT_INORGANIC_CATION_TRANSMEMBRANE_TRANSPORTER_ACTIVITY	GO_DIVALENT_INORGANIC_CATION_TRANSMEMBRANE_TRANSPORTER_ACTIVITY		79	-0.441083	-1.62185	0.00217391	0.0616484	1	2820	tags=41%, list=24%, signal=53%
GO_CENTRAL_NERVOUS_SYSTEM_NEURON_DEVELOPMENT	GO_CENTRAL_NERVOUS_SYSTEM_NEURON_DEVELOPMENT		30	-0.547075	-1.62091	0.010661	0.0619412	1	1718	tags=33%, list=15%, signal=39%
GO_PEPTIDE_TRANSPORT	GO_PEPTIDE_TRANSPORT		35	-0.523213	-1.62022	0.012474	0.0621632	1	1615	tags=37%, list=14%, signal=43%
GO_POSITIVE_REGULATION_OF_ACUTE_INFLAMMATORY_RESPONSE	GO_POSITIVE_REGULATION_OF_ACUTE_INFLAMMATORY_RESPONSE		19	-0.595461	-1.61938	0.00617284	0.062406	1	1261	tags=37%, list=11%, signal=41%
GO_REGULATION_OF_TYROSINE_PHOSPHORYLATION_OF_STAT3_PROTEIN	GO_REGULATION_OF_TYROSINE_PHOSPHORYLATION_OF_STAT3_PROTEIN		31	-0.545158	-1.61915	0.0147368	0.0623827	1	1601	tags=42%, list=14%, signal=49%
GO_NEGATIVE_REGULATION_OF_LEUKOCYTE_MEDIATED_IMMUNITY	GO_NEGATIVE_REGULATION_OF_LEUKOCYTE_MEDIATED_IMMUNITY		33	-0.529423	-1.61718	0.0174292	0.0632443	1	1017	tags=27%, list=9%, signal=30%
GO_ACTIVATION_OF_INNATE_IMMUNE_RESPONSE	GO_ACTIVATION_OF_INNATE_IMMUNE_RESPONSE		168	-0.392483	-1.61667	0	0.0633014	1	1788	tags=26%, list=15%, signal=31%
GO_POSITIVE_REGULATION_OF_CD4_POSITIVE_ALPHA_BETA_T_CELL_ACTIVATION	GO_POSITIVE_REGULATION_OF_CD4_POSITIVE_ALPHA_BETA_T_CELL_ACTIVATION		22	-0.588103	-1.61573	0.0169492	0.0636387	1	1017	tags=32%, list=9%, signal=35%
GO_POSITIVE_REGULATION_OF_PHOSPHATIDYLINOSITOL_3_KINASE_SIGNALING	GO_POSITIVE_REGULATION_OF_PHOSPHATIDYLINOSITOL_3_KINASE_SIGNALING		29	-0.55328	-1.61558	0.0154525	0.0635162	1	1543	tags=34%, list=13%, signal=40%
GO_LYMPHOCYTE_ACTIVATION	GO_LYMPHOCYTE_ACTIVATION		244	-0.379605	-1.61497	0	0.0636183	1	2083	tags=30%, list=18%, signal=35%
GO_POSITIVE_REGULATION_OF_PEPTIDE_SECRETION	GO_POSITIVE_REGULATION_OF_PEPTIDE_SECRETION		47	-0.493539	-1.61453	0.00851064	0.0636675	1	1615	tags=32%, list=14%, signal=37%
GO_ERAD_PATHWAY	GO_ERAD_PATHWAY		68	-0.453891	-1.61428	0.00425532	0.0636702	1	1407	tags=26%, list=12%, signal=30%
GO_PHOSPHATIDYLINOSITOL_3_KINASE_SIGNALING	GO_PHOSPHATIDYLINOSITOL_3_KINASE_SIGNALING		16	-0.616311	-1.61357	0.029106	0.0638853	1	1870	tags=31%, list=16%, signal=37%
GO_RUFFLE_MEMBRANE	GO_RUFFLE_MEMBRANE		59	-0.469141	-1.6132	0.00408163	0.0639152	1	1629	tags=32%, list=14%, signal=37%
GO_REGULATION_OF_PLASMA_MEMBRANE_ORGANIZATION	GO_REGULATION_OF_PLASMA_MEMBRANE_ORGANIZATION		51	-0.479766	-1.61261	0.0019802	0.0640443	1	1095	tags=22%, list=9%, signal=24%
GO_POSITIVE_REGULATION_OF_SMOOTH_MUSCLE_CELL_PROLIFERATION	GO_POSITIVE_REGULATION_OF_SMOOTH_MUSCLE_CELL_PROLIFERATION		44	-0.491174	-1.61198	0.00631579	0.0643005	1	983	tags=20%, list=8%, signal=22%
GO_LIGASE_ACTIVITY_FORMING_CARBON_SULFUR_BONDS	GO_LIGASE_ACTIVITY_FORMING_CARBON_SULFUR_BONDS		29	-0.552962	-1.60905	0.0105263	0.0657315	1	509	tags=21%, list=4%, signal=22%
GO_CERAMIDE_BIOSYNTHETIC_PROCESS	GO_CERAMIDE_BIOSYNTHETIC_PROCESS		27	-0.567531	-1.60795	0.00608519	0.0661396	1	1235	tags=44%, list=11%, signal=50%
GO_TRANSFERASE_ACTIVITY_TRANSFERRING_HEXOSYL_GROUPS	GO_TRANSFERASE_ACTIVITY_TRANSFERRING_HEXOSYL_GROUPS		119	-0.412428	-1.60777	0	0.0660765	1	1568	tags=28%, list=14%, signal=32%
GO_OXIDOREDUCTASE_ACTIVITY_ACTING_ON_PEROXIDE_AS_ACCEPTOR	GO_OXIDOREDUCTASE_ACTIVITY_ACTING_ON_PEROXIDE_AS_ACCEPTOR		25	-0.555099	-1.60751	0.018595	0.0660587	1	1111	tags=28%, list=10%, signal=31%
GO_ANATOMICAL_STRUCTURE_MATURATION	GO_ANATOMICAL_STRUCTURE_MATURATION		22	-0.577849	-1.60682	0.0238095	0.0663318	1	2348	tags=50%, list=20%, signal=63%
GO_RESPONSE_TO_PH	GO_RESPONSE_TO_PH		16	-0.616485	-1.60617	0.0314342	0.0665011	1	1053	tags=38%, list=9%, signal=41%
GO_CONNECTIVE_TISSUE_DEVELOPMENT	GO_CONNECTIVE_TISSUE_DEVELOPMENT		91	-0.429621	-1.6058	0.00626305	0.0665199	1	1907	tags=24%, list=16%, signal=29%
GO_CAMP_MEDIATED_SIGNALING	GO_CAMP_MEDIATED_SIGNALING		15	-0.64243	-1.60564	0.0208768	0.0664393	1	2235	tags=47%, list=19%, signal=58%
GO_PLASMA_MEMBRANE_PROTEIN_COMPLEX	GO_PLASMA_MEMBRANE_PROTEIN_COMPLEX		242	-0.379427	-1.60535	0	0.0664494	1	1473	tags=24%, list=13%, signal=27%
GO_REGULATION_OF_CALCIUM_ION_TRANSMEMBRANE_TRANSPORT	GO_REGULATION_OF_CALCIUM_ION_TRANSMEMBRANE_TRANSPORT		62	-0.456678	-1.60456	0.0112108	0.0667087	1	2812	tags=42%, list=24%, signal=55%
GO_CLATHRIN_MEDIATED_ENDOCYTOSIS	GO_CLATHRIN_MEDIATED_ENDOCYTOSIS		20	-0.590273	-1.60371	0.0204918	0.0670308	1	1016	tags=35%, list=9%, signal=38%
GO_O_GLYCAN_PROCESSING	GO_O_GLYCAN_PROCESSING		27	-0.558165	-1.60332	0.0252101	0.0671137	1	1381	tags=37%, list=12%, signal=42%
GO_ALPHA_BETA_T_CELL_ACTIVATION	GO_ALPHA_BETA_T_CELL_ACTIVATION		41	-0.502558	-1.60273	0.0106383	0.0672633	1	721	tags=24%, list=6%, signal=26%
GO_REGULATION_OF_GASTRULATION	GO_REGULATION_OF_GASTRULATION		15	-0.619464	-1.60215	0.0294737	0.0674664	1	1388	tags=40%, list=12%, signal=45%
GO_CELLULAR_RESPONSE_TO_PEPTIDE	GO_CELLULAR_RESPONSE_TO_PEPTIDE		179	-0.391134	-1.60077	0	0.0680515	1	2309	tags=31%, list=20%, signal=38%
GO_TRANSCRIPTIONAL_REPRESSOR_ACTIVITY_RNA_POLYMERASE_II_CORE_PROMOTER_PROXIMAL_REGION_SEQUENCE_SPECIFIC_BINDING	GO_TRANSCRIPTIONAL_REPRESSOR_ACTIVITY_RNA_POLYMERASE_II_CORE_PROMOTER_PROXIMAL_REGION_SEQUENCE_SPECIFIC_BINDING		62	-0.462752	-1.60054	0.00617284	0.0680428	1	1603	tags=29%, list=14%, signal=34%
GO_REGULATION_OF_STAT_CASCADE	GO_REGULATION_OF_STAT_CASCADE		73	-0.446118	-1.59964	0.00608519	0.0683093	1	2353	tags=37%, list=20%, signal=46%
GO_RESPONSE_TO_FLUID_SHEAR_STRESS	GO_RESPONSE_TO_FLUID_SHEAR_STRESS		25	-0.545838	-1.59759	0.0151844	0.0692839	1	856	tags=28%, list=7%, signal=30%
GO_RESPONSE_TO_TEMPERATURE_STIMULUS	GO_RESPONSE_TO_TEMPERATURE_STIMULUS		85	-0.434175	-1.59689	0.00429185	0.0694938	1	552	tags=13%, list=5%, signal=13%
GO_POSITIVE_REGULATION_OF_NF_KAPPAB_IMPORT_INTO_NUCLEUS	GO_POSITIVE_REGULATION_OF_NF_KAPPAB_IMPORT_INTO_NUCLEUS		15	-0.628718	-1.59474	0.0301205	0.0706731	1	1017	tags=40%, list=9%, signal=44%
GO_REGULATED_EXOCYTOSIS	GO_REGULATED_EXOCYTOSIS		120	-0.410626	-1.59467	0.00212766	0.0705415	1	2405	tags=33%, list=21%, signal=41%
GO_CLATHRIN_COATED_ENDOCYTIC_VESICLE_MEMBRANE	GO_CLATHRIN_COATED_ENDOCYTIC_VESICLE_MEMBRANE		31	-0.526901	-1.59395	0.0204918	0.0708086	1	2328	tags=39%, list=20%, signal=48%
GO_TISSUE_MORPHOGENESIS	GO_TISSUE_MORPHOGENESIS		273	-0.368632	-1.59306	0	0.0711277	1	1718	tags=22%, list=15%, signal=26%
GO_MORPHOGENESIS_OF_A_BRANCHING_STRUCTURE	GO_MORPHOGENESIS_OF_A_BRANCHING_STRUCTURE		78	-0.440949	-1.59189	0.00209205	0.0716416	1	1688	tags=27%, list=15%, signal=31%
GO_CELL_PROJECTION_MEMBRANE	GO_CELL_PROJECTION_MEMBRANE		153	-0.395239	-1.59118	0	0.0718493	1	1697	tags=25%, list=15%, signal=29%
GO_RESPONSE_TO_ORGANOPHOSPHORUS	GO_RESPONSE_TO_ORGANOPHOSPHORUS		73	-0.449517	-1.59108	0.00636943	0.0717191	1	2235	tags=37%, list=19%, signal=46%
GO_PATTERN_RECOGNITION_RECEPTOR_SIGNALING_PATHWAY	GO_PATTERN_RECOGNITION_RECEPTOR_SIGNALING_PATHWAY		86	-0.435833	-1.59068	0.00223714	0.071827	1	1766	tags=28%, list=15%, signal=33%
GO_THYMUS_DEVELOPMENT	GO_THYMUS_DEVELOPMENT		27	-0.530305	-1.5905	0.029724	0.0717894	1	1290	tags=30%, list=11%, signal=33%
GO_ORGAN_MORPHOGENESIS	GO_ORGAN_MORPHOGENESIS		387	-0.354519	-1.58849	0	0.0728169	1	1615	tags=19%, list=14%, signal=21%
GO_SINGLE_ORGANISM_CELL_ADHESION	GO_SINGLE_ORGANISM_CELL_ADHESION		271	-0.367483	-1.58538	0.00218341	0.0746543	1	2348	tags=31%, list=20%, signal=38%
GO_NEGATIVE_REGULATION_OF_LIPID_BIOSYNTHETIC_PROCESS	GO_NEGATIVE_REGULATION_OF_LIPID_BIOSYNTHETIC_PROCESS		27	-0.539983	-1.58493	0.0212766	0.0747491	1	1262	tags=26%, list=11%, signal=29%
GO_PHOSPHATIDYLSERINE_METABOLIC_PROCESS	GO_PHOSPHATIDYLSERINE_METABOLIC_PROCESS		16	-0.603295	-1.58418	0.026	0.075079	1	1576	tags=38%, list=14%, signal=43%
GO_FATTY_ACID_TRANSPORT	GO_FATTY_ACID_TRANSPORT		34	-0.514749	-1.584	0.0143443	0.0750153	1	2223	tags=41%, list=19%, signal=51%
GO_EPIDERMAL_GROWTH_FACTOR_RECEPTOR_SIGNALING_PATHWAY	GO_EPIDERMAL_GROWTH_FACTOR_RECEPTOR_SIGNALING_PATHWAY		38	-0.501796	-1.58391	0.020284	0.07488	1	2898	tags=45%, list=25%, signal=59%
GO_REGULATION_OF_ACTION_POTENTIAL	GO_REGULATION_OF_ACTION_POTENTIAL		16	-0.613413	-1.58368	0.0357895	0.0748615	1	1023	tags=25%, list=9%, signal=27%
GO_RESPONSE_TO_LIPOPROTEIN_PARTICLE	GO_RESPONSE_TO_LIPOPROTEIN_PARTICLE		15	-0.620327	-1.582	0.0294118	0.075713	1	247	tags=27%, list=2%, signal=27%
GO_ENDOPLASMIC_RETICULUM_TO_CYTOSOL_TRANSPORT	GO_ENDOPLASMIC_RETICULUM_TO_CYTOSOL_TRANSPORT		17	-0.601575	-1.5817	0.0239044	0.0756894	1	383	tags=24%, list=3%, signal=24%
GO_ATPASE_ACTIVITY_COUPLED_TO_MOVEMENT_OF_SUBSTANCES	GO_ATPASE_ACTIVITY_COUPLED_TO_MOVEMENT_OF_SUBSTANCES		74	-0.441403	-1.58084	0.00414938	0.0760451	1	1760	tags=28%, list=15%, signal=33%
GO_POSITIVE_REGULATION_OF_ALPHA_BETA_T_CELL_PROLIFERATION	GO_POSITIVE_REGULATION_OF_ALPHA_BETA_T_CELL_PROLIFERATION		15	-0.619835	-1.58072	0.0315789	0.075938	1	1766	tags=67%, list=15%, signal=79%
GO_FATTY_ACID_DERIVATIVE_BIOSYNTHETIC_PROCESS	GO_FATTY_ACID_DERIVATIVE_BIOSYNTHETIC_PROCESS		20	-0.572034	-1.58064	0.0287474	0.0758184	1	2136	tags=50%, list=18%, signal=61%
GO_REGULATION_OF_PROTEIN_KINASE_B_SIGNALING	GO_REGULATION_OF_PROTEIN_KINASE_B_SIGNALING		70	-0.445075	-1.57969	0.00431035	0.0762036	1	1627	tags=29%, list=14%, signal=33%
GO_IMMUNE_SYSTEM_DEVELOPMENT	GO_IMMUNE_SYSTEM_DEVELOPMENT		376	-0.354333	-1.57954	0	0.0761626	1	1651	tags=22%, list=14%, signal=25%
GO_ANION_HOMEOSTASIS	GO_ANION_HOMEOSTASIS		20	-0.583097	-1.57941	0.0104384	0.0760717	1	1476	tags=30%, list=13%, signal=34%
GO_N_GLYCAN_PROCESSING	GO_N_GLYCAN_PROCESSING		15	-0.619013	-1.57574	0.0379747	0.0782924	1	927	tags=33%, list=8%, signal=36%
GO_REGULATION_OF_CATION_CHANNEL_ACTIVITY	GO_REGULATION_OF_CATION_CHANNEL_ACTIVITY		43	-0.486623	-1.57502	0.0107991	0.0785784	1	2585	tags=42%, list=22%, signal=54%
GO_POSITIVE_REGULATION_OF_PHOSPHOLIPID_METABOLIC_PROCESS	GO_POSITIVE_REGULATION_OF_PHOSPHOLIPID_METABOLIC_PROCESS		25	-0.540463	-1.57463	0.0274262	0.0786986	1	1222	tags=32%, list=11%, signal=36%
GO_FAT_CELL_DIFFERENTIATION	GO_FAT_CELL_DIFFERENTIATION		61	-0.454337	-1.57255	0.00442478	0.0798625	1	1907	tags=33%, list=16%, signal=39%
GO_CELLULAR_RESPONSE_TO_GROWTH_HORMONE_STIMULUS	GO_CELLULAR_RESPONSE_TO_GROWTH_HORMONE_STIMULUS		15	-0.617479	-1.57115	0.0266393	0.0806604	1	3277	tags=53%, list=28%, signal=74%
GO_ORGANELLE_MEMBRANE_FUSION	GO_ORGANELLE_MEMBRANE_FUSION		61	-0.44379	-1.5698	0.0103306	0.081372	1	1496	tags=23%, list=13%, signal=26%
GO_PROTEIN_O_LINKED_GLYCOSYLATION	GO_PROTEIN_O_LINKED_GLYCOSYLATION		52	-0.462197	-1.56924	0.0100604	0.08156	1	1381	tags=33%, list=12%, signal=37%
GO_GLAND_MORPHOGENESIS	GO_GLAND_MORPHOGENESIS		44	-0.491103	-1.56903	0.0148936	0.0815012	1	1452	tags=25%, list=13%, signal=28%
GO_POSITIVE_REGULATION_OF_INTERFERON_BETA_PRODUCTION	GO_POSITIVE_REGULATION_OF_INTERFERON_BETA_PRODUCTION		25	-0.546038	-1.56818	0.0210526	0.0818758	1	388	tags=16%, list=3%, signal=17%
GO_INTRACELLULAR_LIPID_TRANSPORT	GO_INTRACELLULAR_LIPID_TRANSPORT		15	-0.621986	-1.56812	0.0265306	0.0817432	1	2649	tags=53%, list=23%, signal=69%
GO_REGULATION_OF_SMOOTH_MUSCLE_CELL_PROLIFERATION	GO_REGULATION_OF_SMOOTH_MUSCLE_CELL_PROLIFERATION		69	-0.444915	-1.56799	0.00843882	0.0816229	1	983	tags=20%, list=8%, signal=22%
GO_TOLL_LIKE_RECEPTOR_SIGNALING_PATHWAY	GO_TOLL_LIKE_RECEPTOR_SIGNALING_PATHWAY		71	-0.434894	-1.56579	0.0187891	0.0828156	1	1766	tags=30%, list=15%, signal=35%
GO_REGULATION_OF_EPITHELIAL_CELL_MIGRATION	GO_REGULATION_OF_EPITHELIAL_CELL_MIGRATION		95	-0.420853	-1.5653	0.0020284	0.0829812	1	2283	tags=32%, list=20%, signal=39%
GO_POSITIVE_REGULATION_OF_CYTOKINE_PRODUCTION_INVOLVED_IN_IMMUNE_RESPONSE	GO_POSITIVE_REGULATION_OF_CYTOKINE_PRODUCTION_INVOLVED_IN_IMMUNE_RESPONSE		23	-0.559007	-1.56498	0.0210084	0.0830449	1	2369	tags=61%, list=20%, signal=76%
GO_VASCULAR_ENDOTHELIAL_GROWTH_FACTOR_RECEPTOR_SIGNALING_PATHWAY	GO_VASCULAR_ENDOTHELIAL_GROWTH_FACTOR_RECEPTOR_SIGNALING_PATHWAY		57	-0.459078	-1.56489	0.0175055	0.0828987	1	2055	tags=37%, list=18%, signal=45%
GO_POSITIVE_REGULATION_OF_HEART_CONTRACTION	GO_POSITIVE_REGULATION_OF_HEART_CONTRACTION		15	-0.6208	-1.5635	0.0451745	0.0835978	1	1483	tags=47%, list=13%, signal=53%
GO_REGULATION_OF_LIPID_STORAGE	GO_REGULATION_OF_LIPID_STORAGE		28	-0.52785	-1.56328	0.0235546	0.0835577	1	530	tags=14%, list=5%, signal=15%
GO_REGULATION_OF_EPITHELIAL_CELL_DIFFERENTIATION	GO_REGULATION_OF_EPITHELIAL_CELL_DIFFERENTIATION		61	-0.445486	-1.56286	0.0166667	0.0836652	1	1874	tags=26%, list=16%, signal=31%
GO_SENSORY_ORGAN_MORPHOGENESIS	GO_SENSORY_ORGAN_MORPHOGENESIS		95	-0.404792	-1.5622	0	0.0839112	1	1601	tags=20%, list=14%, signal=23%
GO_RESPONSE_TO_ELECTRICAL_STIMULUS	GO_RESPONSE_TO_ELECTRICAL_STIMULUS		22	-0.551945	-1.56114	0.0373444	0.0844702	1	983	tags=32%, list=8%, signal=35%
GO_B_CELL_RECEPTOR_SIGNALING_PATHWAY	GO_B_CELL_RECEPTOR_SIGNALING_PATHWAY		31	-0.52055	-1.56081	0.0237624	0.0845327	1	1887	tags=35%, list=16%, signal=42%
GO_RESPONSE_TO_FUNGUS	GO_RESPONSE_TO_FUNGUS		18	-0.596902	-1.56034	0.0243902	0.0846914	1	832	tags=33%, list=7%, signal=36%
GO_POSITIVE_REGULATION_OF_CELL_PROJECTION_ORGANIZATION	GO_POSITIVE_REGULATION_OF_CELL_PROJECTION_ORGANIZATION		164	-0.384622	-1.56011	0.00215054	0.0846279	1	2252	tags=30%, list=19%, signal=37%
GO_TISSUE_MIGRATION	GO_TISSUE_MIGRATION		43	-0.483385	-1.5601	0.0145228	0.0844424	1	1822	tags=33%, list=16%, signal=38%
GO_MUSCLE_ORGAN_DEVELOPMENT	GO_MUSCLE_ORGAN_DEVELOPMENT		135	-0.399711	-1.5594	0	0.084758	1	1614	tags=24%, list=14%, signal=27%
GO_REGULATION_OF_B_CELL_DIFFERENTIATION	GO_REGULATION_OF_B_CELL_DIFFERENTIATION		16	-0.603114	-1.55883	0.0330578	0.0849651	1	422	tags=31%, list=4%, signal=32%
GO_AMIDE_TRANSPORT	GO_AMIDE_TRANSPORT		43	-0.465999	-1.55822	0.0102881	0.0851976	1	1615	tags=33%, list=14%, signal=38%
GO_ACTIVATION_OF_GTPASE_ACTIVITY	GO_ACTIVATION_OF_GTPASE_ACTIVITY		50	-0.462038	-1.55759	0.0142566	0.0854505	1	2502	tags=40%, list=22%, signal=51%
GO_MONOSACCHARIDE_TRANSPORT	GO_MONOSACCHARIDE_TRANSPORT		28	-0.529396	-1.55758	0.027897	0.0852622	1	2450	tags=54%, list=21%, signal=68%
GO_NEGATIVE_REGULATION_OF_IMMUNE_RESPONSE	GO_NEGATIVE_REGULATION_OF_IMMUNE_RESPONSE		75	-0.43092	-1.557	0.00404858	0.0854433	1	760	tags=20%, list=7%, signal=21%
GO_CYTOKINE_SECRETION	GO_CYTOKINE_SECRETION		24	-0.545682	-1.55287	0.0303644	0.0880158	1	2369	tags=63%, list=20%, signal=78%
GO_REGULATION_OF_ANOIKIS	GO_REGULATION_OF_ANOIKIS		19	-0.561473	-1.55271	0.0416667	0.0879202	1	1002	tags=32%, list=9%, signal=35%
GO_REGULATION_OF_TUMOR_NECROSIS_FACTOR_MEDIATED_SIGNALING_PATHWAY	GO_REGULATION_OF_TUMOR_NECROSIS_FACTOR_MEDIATED_SIGNALING_PATHWAY		38	-0.490127	-1.5526	0.00665188	0.0877981	1	660	tags=21%, list=6%, signal=22%
GO_ENDODERM_FORMATION	GO_ENDODERM_FORMATION		21	-0.559189	-1.55052	0.0361702	0.0890876	1	365	tags=24%, list=3%, signal=25%
GO_REGULATION_OF_RESPONSE_TO_OXIDATIVE_STRESS	GO_REGULATION_OF_RESPONSE_TO_OXIDATIVE_STRESS		43	-0.477538	-1.55044	0.0260304	0.0889402	1	1105	tags=16%, list=10%, signal=18%
GO_REGULATION_OF_HORMONE_LEVELS	GO_REGULATION_OF_HORMONE_LEVELS		214	-0.371551	-1.54977	0	0.0892702	1	1615	tags=21%, list=14%, signal=23%
GO_REGULATION_OF_HUMORAL_IMMUNE_RESPONSE	GO_REGULATION_OF_HUMORAL_IMMUNE_RESPONSE		19	-0.574113	-1.54944	0.0415842	0.0892802	1	1596	tags=32%, list=14%, signal=37%
GO_NEGATIVE_REGULATION_OF_AXONOGENESIS	GO_NEGATIVE_REGULATION_OF_AXONOGENESIS		33	-0.504414	-1.54804	0.0221239	0.0900368	1	3111	tags=45%, list=27%, signal=62%
GO_GLYCOLIPID_BIOSYNTHETIC_PROCESS	GO_GLYCOLIPID_BIOSYNTHETIC_PROCESS		46	-0.466988	-1.54748	0.0152838	0.0902587	1	1193	tags=24%, list=10%, signal=27%
GO_GALACTOSYLTRANSFERASE_ACTIVITY	GO_GALACTOSYLTRANSFERASE_ACTIVITY		17	-0.587755	-1.54698	0.022541	0.0904773	1	1568	tags=41%, list=14%, signal=48%
GO_POSITIVE_REGULATION_OF_ESTABLISHMENT_OF_PROTEIN_LOCALIZATION	GO_POSITIVE_REGULATION_OF_ESTABLISHMENT_OF_PROTEIN_LOCALIZATION		334	-0.351416	-1.54539	0	0.091384	1	1546	tags=23%, list=13%, signal=26%
GO_ERBB_SIGNALING_PATHWAY	GO_ERBB_SIGNALING_PATHWAY		56	-0.441176	-1.54528	0.0169492	0.0912684	1	2969	tags=41%, list=26%, signal=55%
GO_POSITIVE_REGULATION_OF_EPITHELIAL_CELL_DIFFERENTIATION	GO_POSITIVE_REGULATION_OF_EPITHELIAL_CELL_DIFFERENTIATION		25	-0.543579	-1.54393	0.0210084	0.0920727	1	1874	tags=36%, list=16%, signal=43%
GO_EAR_MORPHOGENESIS	GO_EAR_MORPHOGENESIS		42	-0.476481	-1.54316	0.0280778	0.0925018	1	1184	tags=17%, list=10%, signal=18%
GO_UDP_GLYCOSYLTRANSFERASE_ACTIVITY	GO_UDP_GLYCOSYLTRANSFERASE_ACTIVITY		71	-0.433625	-1.54267	0.00852879	0.0926722	1	1568	tags=31%, list=14%, signal=36%
GO_CELLULAR_RESPONSE_TO_CORTICOSTEROID_STIMULUS	GO_CELLULAR_RESPONSE_TO_CORTICOSTEROID_STIMULUS		30	-0.51648	-1.54247	0.0266393	0.0926067	1	555	tags=27%, list=5%, signal=28%
GO_GRANULOCYTE_ACTIVATION	GO_GRANULOCYTE_ACTIVATION		15	-0.595467	-1.54095	0.0365112	0.0934968	1	1095	tags=20%, list=9%, signal=22%
GO_CELLULAR_DEFENSE_RESPONSE	GO_CELLULAR_DEFENSE_RESPONSE		32	-0.505019	-1.54068	0.020284	0.093483	1	3549	tags=50%, list=31%, signal=72%
GO_REGULATION_OF_OSSIFICATION	GO_REGULATION_OF_OSSIFICATION		85	-0.415702	-1.53975	0.00436681	0.0939864	1	2164	tags=31%, list=19%, signal=37%
GO_REGULATION_OF_OXIDOREDUCTASE_ACTIVITY	GO_REGULATION_OF_OXIDOREDUCTASE_ACTIVITY		56	-0.445868	-1.53966	0.0107527	0.0938699	1	1111	tags=20%, list=10%, signal=22%
GO_CELLULAR_RESPONSE_TO_VIRUS	GO_CELLULAR_RESPONSE_TO_VIRUS		18	-0.579084	-1.53926	0.0465116	0.0940389	1	1215	tags=33%, list=10%, signal=37%
GO_ESTABLISHMENT_OF_PROTEIN_LOCALIZATION_TO_PLASMA_MEMBRANE	GO_ESTABLISHMENT_OF_PROTEIN_LOCALIZATION_TO_PLASMA_MEMBRANE		70	-0.429268	-1.53899	0.012685	0.0940658	1	1120	tags=20%, list=10%, signal=22%
GO_PROTEIN_IMPORT_INTO_NUCLEUS_TRANSLOCATION	GO_PROTEIN_IMPORT_INTO_NUCLEUS_TRANSLOCATION		20	-0.559615	-1.53845	0.0295359	0.0943085	1	332	tags=15%, list=3%, signal=15%
GO_ACETYLGLUCOSAMINYLTRANSFERASE_ACTIVITY	GO_ACETYLGLUCOSAMINYLTRANSFERASE_ACTIVITY		30	-0.499894	-1.53742	0.021097	0.0949291	1	1092	tags=30%, list=9%, signal=33%
GO_REGULATION_OF_TISSUE_REMODELING	GO_REGULATION_OF_TISSUE_REMODELING		36	-0.496445	-1.53702	0.0247934	0.0950075	1	1547	tags=33%, list=13%, signal=38%
GO_REGULATION_OF_B_CELL_ACTIVATION	GO_REGULATION_OF_B_CELL_ACTIVATION		78	-0.41731	-1.53695	0.0166667	0.0948488	1	1209	tags=24%, list=10%, signal=27%
GO_RESPONSE_TO_GAMMA_RADIATION	GO_RESPONSE_TO_GAMMA_RADIATION		40	-0.483769	-1.53673	0.0268595	0.0948404	1	1002	tags=23%, list=9%, signal=25%
GO_CELL_CELL_ADHESION	GO_CELL_CELL_ADHESION		295	-0.352194	-1.53544	0	0.0956242	1	2296	tags=29%, list=20%, signal=36%
GO_REGULATION_OF_ENDOTHELIAL_CELL_PROLIFERATION	GO_REGULATION_OF_ENDOTHELIAL_CELL_PROLIFERATION		50	-0.455294	-1.53536	0.0113895	0.095468	1	1601	tags=28%, list=14%, signal=32%
GO_SECRETION	GO_SECRETION		312	-0.353393	-1.53521	0	0.0953732	1	2160	tags=29%, list=19%, signal=35%
GO_SPHINGOLIPID_BIOSYNTHETIC_PROCESS	GO_SPHINGOLIPID_BIOSYNTHETIC_PROCESS		44	-0.471251	-1.53496	0.0306346	0.095359	1	1235	tags=27%, list=11%, signal=30%
GO_RESPONSE_TO_INTERFERON_ALPHA	GO_RESPONSE_TO_INTERFERON_ALPHA		17	-0.590799	-1.53486	0.0336842	0.0952594	1	1870	tags=53%, list=16%, signal=63%
GO_REGULATION_OF_METAL_ION_TRANSPORT	GO_REGULATION_OF_METAL_ION_TRANSPORT		157	-0.38075	-1.53468	0.00428265	0.0951848	1	2812	tags=35%, list=24%, signal=46%
GO_REGULATION_OF_GTPASE_ACTIVITY	GO_REGULATION_OF_GTPASE_ACTIVITY		403	-0.342836	-1.53396	0	0.0955622	1	1833	tags=22%, list=16%, signal=25%
GO_CAMP_METABOLIC_PROCESS	GO_CAMP_METABOLIC_PROCESS		18	-0.580146	-1.53357	0.0375276	0.0956813	1	1586	tags=28%, list=14%, signal=32%
GO_CORE_PROMOTER_SEQUENCE_SPECIFIC_DNA_BINDING	GO_CORE_PROMOTER_SEQUENCE_SPECIFIC_DNA_BINDING		70	-0.431551	-1.5333	0.010917	0.0957158	1	1684	tags=27%, list=15%, signal=32%
GO_TRANSCRIPTIONAL_REPRESSOR_ACTIVITY_RNA_POLYMERASE_II_TRANSCRIPTION_REGULATORY_REGION_SEQUENCE_SPECIFIC_BINDING	GO_TRANSCRIPTIONAL_REPRESSOR_ACTIVITY_RNA_POLYMERASE_II_TRANSCRIPTION_REGULATORY_REGION_SEQUENCE_SPECIFIC_BINDING		95	-0.410701	-1.53242	0.00404858	0.0961269	1	1603	tags=27%, list=14%, signal=32%
GO_LIPOPOLYSACCHARIDE_MEDIATED_SIGNALING_PATHWAY	GO_LIPOPOLYSACCHARIDE_MEDIATED_SIGNALING_PATHWAY		25	-0.527334	-1.53118	0.036965	0.0968546	1	1788	tags=28%, list=15%, signal=33%
GO_CELLULAR_RESPONSE_TO_FLUID_SHEAR_STRESS	GO_CELLULAR_RESPONSE_TO_FLUID_SHEAR_STRESS		17	-0.585339	-1.53057	0.0394191	0.0971428	1	856	tags=35%, list=7%, signal=38%
GO_VASCULATURE_DEVELOPMENT	GO_VASCULATURE_DEVELOPMENT		257	-0.357949	-1.53005	0	0.0973093	1	1612	tags=22%, list=14%, signal=25%
GO_NEGATIVE_REGULATION_OF_ION_TRANSPORT	GO_NEGATIVE_REGULATION_OF_ION_TRANSPORT		59	-0.433107	-1.52993	0.0197368	0.0972215	1	2957	tags=37%, list=26%, signal=50%
GO_NEGATIVE_REGULATION_OF_INTRINSIC_APOPTOTIC_SIGNALING_PATHWAY	GO_NEGATIVE_REGULATION_OF_INTRINSIC_APOPTOTIC_SIGNALING_PATHWAY		68	-0.426161	-1.52988	0.00623701	0.0970446	1	1645	tags=28%, list=14%, signal=32%
GO_REGULATION_OF_ION_TRANSPORT	GO_REGULATION_OF_ION_TRANSPORT		261	-0.357399	-1.52908	0	0.0974157	1	1865	tags=23%, list=16%, signal=26%
GO_GOLGI_CISTERNA_MEMBRANE	GO_GOLGI_CISTERNA_MEMBRANE		57	-0.443294	-1.52784	0.0123457	0.0981173	1	1780	tags=30%, list=15%, signal=35%
GO_NEURAL_CREST_CELL_DIFFERENTIATION	GO_NEURAL_CREST_CELL_DIFFERENTIATION		34	-0.495697	-1.52773	0.021645	0.0980116	1	1466	tags=35%, list=13%, signal=40%
GO_RESPONSE_TO_COLD	GO_RESPONSE_TO_COLD		25	-0.537847	-1.52663	0.0477178	0.0986575	1	530	tags=20%, list=5%, signal=21%
GO_RESPONSE_TO_EXTRACELLULAR_STIMULUS	GO_RESPONSE_TO_EXTRACELLULAR_STIMULUS		262	-0.354241	-1.52551	0	0.0993633	1	1199	tags=16%, list=10%, signal=18%
GO_NEGATIVE_REGULATION_OF_HORMONE_SECRETION	GO_NEGATIVE_REGULATION_OF_HORMONE_SECRETION		36	-0.490538	-1.52482	0.0212314	0.0997028	1	1586	tags=25%, list=14%, signal=29%
GO_POSITIVE_REGULATION_OF_CALCIUM_MEDIATED_SIGNALING	GO_POSITIVE_REGULATION_OF_CALCIUM_MEDIATED_SIGNALING		21	-0.548137	-1.5245	0.0435685	0.0997725	1	1808	tags=29%, list=16%, signal=34%
GO_ENDODERM_DEVELOPMENT	GO_ENDODERM_DEVELOPMENT		32	-0.49008	-1.5244	0.0372671	0.0996438	1	365	tags=19%, list=3%, signal=19%
GO_REGULATION_OF_SYMBIOSIS_ENCOMPASSING_MUTUALISM_THROUGH_PARASITISM	GO_REGULATION_OF_SYMBIOSIS_ENCOMPASSING_MUTUALISM_THROUGH_PARASITISM		156	-0.380984	-1.52407	0	0.099721	1	1215	tags=22%, list=10%, signal=24%
GO_FORMATION_OF_PRIMARY_GERM_LAYER	GO_FORMATION_OF_PRIMARY_GERM_LAYER		50	-0.446904	-1.52403	0.0123967	0.0995454	1	502	tags=20%, list=4%, signal=21%
GO_NEGATIVE_REGULATION_OF_AXON_EXTENSION	GO_NEGATIVE_REGULATION_OF_AXON_EXTENSION		19	-0.560333	-1.52391	0.0398406	0.0994466	1	3111	tags=58%, list=27%, signal=79%
GO_REGULATION_OF_NEURON_APOPTOTIC_PROCESS	GO_REGULATION_OF_NEURON_APOPTOTIC_PROCESS		117	-0.396889	-1.52364	0.00653595	0.0994767	1	1053	tags=20%, list=9%, signal=21%
GO_BIOLOGICAL_ADHESION	GO_BIOLOGICAL_ADHESION		485	-0.335326	-1.52248	0	0.100265	1	2353	tags=28%, list=20%, signal=33%
GO_HUMORAL_IMMUNE_RESPONSE	GO_HUMORAL_IMMUNE_RESPONSE		74	-0.423365	-1.52193	0.012024	0.100461	1	1002	tags=24%, list=9%, signal=26%
GO_ANTIGEN_RECEPTOR_MEDIATED_SIGNALING_PATHWAY	GO_ANTIGEN_RECEPTOR_MEDIATED_SIGNALING_PATHWAY		149	-0.379213	-1.52146	0.0043384	0.100619	1	2328	tags=28%, list=20%, signal=35%
GO_THIOESTER_BIOSYNTHETIC_PROCESS	GO_THIOESTER_BIOSYNTHETIC_PROCESS		36	-0.492968	-1.52126	0.0426439	0.100558	1	1695	tags=33%, list=15%, signal=39%
GO_REGULATION_OF_SYNAPTIC_VESICLE_EXOCYTOSIS	GO_REGULATION_OF_SYNAPTIC_VESICLE_EXOCYTOSIS		15	-0.597849	-1.52079	0.0378151	0.100744	1	1439	tags=33%, list=12%, signal=38%
GO_NEGATIVE_REGULATION_OF_CHEMOTAXIS	GO_NEGATIVE_REGULATION_OF_CHEMOTAXIS		22	-0.549731	-1.52031	0.0298805	0.10094	1	1819	tags=36%, list=16%, signal=43%
GO_EXTRACELLULAR_STRUCTURE_ORGANIZATION	GO_EXTRACELLULAR_STRUCTURE_ORGANIZATION		125	-0.383352	-1.51794	0	0.102547	1	1741	tags=23%, list=15%, signal=27%
GO_REGULATION_OF_PHOSPHATIDYLINOSITOL_3_KINASE_SIGNALING	GO_REGULATION_OF_PHOSPHATIDYLINOSITOL_3_KINASE_SIGNALING		80	-0.411323	-1.51639	0.00619835	0.103515	1	2024	tags=31%, list=17%, signal=38%
GO_REGULATION_OF_MULTICELLULAR_ORGANISMAL_METABOLIC_PROCESS	GO_REGULATION_OF_MULTICELLULAR_ORGANISMAL_METABOLIC_PROCESS		20	-0.555387	-1.51636	0.0356394	0.10333	1	1542	tags=45%, list=13%, signal=52%
GO_REGULATION_OF_FILOPODIUM_ASSEMBLY	GO_REGULATION_OF_FILOPODIUM_ASSEMBLY		21	-0.540038	-1.5162	0.0255403	0.103278	1	2100	tags=38%, list=18%, signal=46%
GO_TRANSITION_METAL_ION_TRANSMEMBRANE_TRANSPORTER_ACTIVITY	GO_TRANSITION_METAL_ION_TRANSMEMBRANE_TRANSPORTER_ACTIVITY		25	-0.521639	-1.51338	0.0361702	0.105368	1	2297	tags=36%, list=20%, signal=45%
GO_MATERNAL_PROCESS_INVOLVED_IN_FEMALE_PREGNANCY	GO_MATERNAL_PROCESS_INVOLVED_IN_FEMALE_PREGNANCY		42	-0.468324	-1.51314	0.0294737	0.10533	1	1458	tags=36%, list=13%, signal=41%
GO_TRANSPORT_VESICLE	GO_TRANSPORT_VESICLE		213	-0.362347	-1.51281	0	0.105387	1	1286	tags=19%, list=11%, signal=21%
GO_POSITIVE_REGULATION_OF_CELL_DEATH	GO_POSITIVE_REGULATION_OF_CELL_DEATH		434	-0.334972	-1.51269	0	0.105268	1	1102	tags=16%, list=10%, signal=17%
GO_APOPTOTIC_SIGNALING_PATHWAY	GO_APOPTOTIC_SIGNALING_PATHWAY		226	-0.359216	-1.51231	0	0.105396	1	1738	tags=23%, list=15%, signal=27%
GO_INNER_EAR_MORPHOGENESIS	GO_INNER_EAR_MORPHOGENESIS		32	-0.490145	-1.5123	0.0292887	0.105197	1	1184	tags=16%, list=10%, signal=17%
GO_NEGATIVE_REGULATION_OF_NERVOUS_SYSTEM_DEVELOPMENT	GO_NEGATIVE_REGULATION_OF_NERVOUS_SYSTEM_DEVELOPMENT		139	-0.383696	-1.51226	0.0045045	0.105015	1	1629	tags=24%, list=14%, signal=27%
GO_NUCLEAR_HETEROCHROMATIN	GO_NUCLEAR_HETEROCHROMATIN		27	-0.512208	-1.51221	0.029106	0.104853	1	607	tags=19%, list=5%, signal=19%
GO_REGULATION_OF_EPITHELIAL_CELL_APOPTOTIC_PROCESS	GO_REGULATION_OF_EPITHELIAL_CELL_APOPTOTIC_PROCESS		32	-0.48615	-1.5121	0.0348361	0.104728	1	2075	tags=34%, list=18%, signal=42%
GO_RESPONSE_TO_INSULIN	GO_RESPONSE_TO_INSULIN		138	-0.375415	-1.51073	0.00215054	0.10559	1	2166	tags=25%, list=19%, signal=31%
GO_POSITIVE_REGULATION_OF_PHOSPHATASE_ACTIVITY	GO_POSITIVE_REGULATION_OF_PHOSPHATASE_ACTIVITY		19	-0.567104	-1.51061	0.0441177	0.105499	1	2356	tags=26%, list=20%, signal=33%
GO_REGULATION_OF_CELLULAR_RESPONSE_TO_GROWTH_FACTOR_STIMULUS	GO_REGULATION_OF_CELLULAR_RESPONSE_TO_GROWTH_FACTOR_STIMULUS		118	-0.392542	-1.51043	0.00643777	0.105434	1	2538	tags=36%, list=22%, signal=45%
GO_NEGATIVE_REGULATION_OF_PROTEIN_SERINE_THREONINE_KINASE_ACTIVITY	GO_NEGATIVE_REGULATION_OF_PROTEIN_SERINE_THREONINE_KINASE_ACTIVITY		93	-0.406014	-1.5096	0.0106838	0.10588	1	1349	tags=19%, list=12%, signal=22%
GO_SEMAPHORIN_PLEXIN_SIGNALING_PATHWAY	GO_SEMAPHORIN_PLEXIN_SIGNALING_PATHWAY		22	-0.537277	-1.50824	0.0357143	0.106697	1	2386	tags=36%, list=21%, signal=46%
GO_NEGATIVE_REGULATION_OF_CELL_ACTIVATION	GO_NEGATIVE_REGULATION_OF_CELL_ACTIVATION		103	-0.391401	-1.50782	0.00890869	0.106855	1	1133	tags=19%, list=10%, signal=21%
GO_LRR_DOMAIN_BINDING	GO_LRR_DOMAIN_BINDING		15	-0.591235	-1.50743	0.062	0.10695	1	470	tags=13%, list=4%, signal=14%
GO_NEGATIVE_REGULATION_OF_MUSCLE_CELL_DIFFERENTIATION	GO_NEGATIVE_REGULATION_OF_MUSCLE_CELL_DIFFERENTIATION		30	-0.50455	-1.50707	0.0378486	0.10699	1	1736	tags=37%, list=15%, signal=43%
GO_POSITIVE_REGULATION_OF_STRESS_ACTIVATED_PROTEIN_KINASE_SIGNALING_CASCADE	GO_POSITIVE_REGULATION_OF_STRESS_ACTIVATED_PROTEIN_KINASE_SIGNALING_CASCADE		98	-0.396631	-1.50675	0.0148936	0.107005	1	1926	tags=30%, list=17%, signal=35%
GO_SECRETION_BY_CELL	GO_SECRETION_BY_CELL		259	-0.352438	-1.50633	0	0.107123	1	2405	tags=32%, list=21%, signal=39%
GO_POSITIVE_REGULATION_OF_NEURON_PROJECTION_DEVELOPMENT	GO_POSITIVE_REGULATION_OF_NEURON_PROJECTION_DEVELOPMENT		120	-0.387639	-1.50563	0.00448431	0.107501	1	2252	tags=31%, list=19%, signal=38%
GO_INFLAMMATORY_RESPONSE_TO_ANTIGENIC_STIMULUS	GO_INFLAMMATORY_RESPONSE_TO_ANTIGENIC_STIMULUS		21	-0.545777	-1.50423	0.0383065	0.1084	1	2328	tags=43%, list=20%, signal=54%
GO_2_OXOGLUTARATE_METABOLIC_PROCESS	GO_2_OXOGLUTARATE_METABOLIC_PROCESS		17	-0.580067	-1.50398	0.0533881	0.108384	1	3000	tags=47%, list=26%, signal=63%
GO_BONE_MINERALIZATION	GO_BONE_MINERALIZATION		20	-0.550898	-1.50389	0.0630435	0.108253	1	2131	tags=45%, list=18%, signal=55%
GO_NEGATIVE_REGULATION_OF_IMMUNE_SYSTEM_PROCESS	GO_NEGATIVE_REGULATION_OF_IMMUNE_SYSTEM_PROCESS		243	-0.352681	-1.50376	0	0.108122	1	1483	tags=22%, list=13%, signal=25%
GO_CELLULAR_RESPONSE_TO_OXYGEN_CONTAINING_COMPOUND	GO_CELLULAR_RESPONSE_TO_OXYGEN_CONTAINING_COMPOUND		483	-0.331735	-1.50325	0	0.108341	1	1551	tags=19%, list=13%, signal=21%
GO_MYELOID_CELL_HOMEOSTASIS	GO_MYELOID_CELL_HOMEOSTASIS		66	-0.430374	-1.50171	0.0168421	0.109362	1	1601	tags=23%, list=14%, signal=26%
GO_ACTIVATION_OF_CYSTEINE_TYPE_ENDOPEPTIDASE_ACTIVITY	GO_ACTIVATION_OF_CYSTEINE_TYPE_ENDOPEPTIDASE_ACTIVITY		76	-0.412481	-1.50169	0.0105263	0.109174	1	636	tags=14%, list=5%, signal=15%
GO_HINDBRAIN_MORPHOGENESIS	GO_HINDBRAIN_MORPHOGENESIS		17	-0.575736	-1.50076	0.0575693	0.109754	1	3111	tags=59%, list=27%, signal=80%
GO_REGULATION_OF_MAP_KINASE_ACTIVITY	GO_REGULATION_OF_MAP_KINASE_ACTIVITY		219	-0.354664	-1.49964	0.00224719	0.110474	1	1642	tags=20%, list=14%, signal=23%
GO_PLASMA_MEMBRANE_RECEPTOR_COMPLEX	GO_PLASMA_MEMBRANE_RECEPTOR_COMPLEX		89	-0.39824	-1.4991	0.010917	0.110732	1	1551	tags=27%, list=13%, signal=31%
GO_REGULATION_OF_FAT_CELL_DIFFERENTIATION	GO_REGULATION_OF_FAT_CELL_DIFFERENTIATION		57	-0.447331	-1.49909	0.0153846	0.11054	1	1977	tags=26%, list=17%, signal=32%
GO_MULTICELLULAR_ORGANISMAL_MACROMOLECULE_METABOLIC_PROCESS	GO_MULTICELLULAR_ORGANISMAL_MACROMOLECULE_METABOLIC_PROCESS		19	-0.543562	-1.49819	0.0489362	0.11108	1	1307	tags=26%, list=11%, signal=30%
GO_POSITIVE_REGULATION_OF_CELL_DEVELOPMENT	GO_POSITIVE_REGULATION_OF_CELL_DEVELOPMENT		251	-0.350481	-1.4977	0	0.111263	1	2134	tags=27%, list=18%, signal=33%
GO_REGULATION_OF_CELL_SUBSTRATE_ADHESION	GO_REGULATION_OF_CELL_SUBSTRATE_ADHESION		101	-0.399911	-1.49699	0.0106838	0.111649	1	2336	tags=33%, list=20%, signal=41%
GO_MORPHOGENESIS_OF_AN_EPITHELIUM	GO_MORPHOGENESIS_OF_AN_EPITHELIUM		218	-0.353605	-1.49579	0.00411523	0.112426	1	1718	tags=22%, list=15%, signal=26%
GO_CELLULAR_RESPONSE_TO_NITROGEN_COMPOUND	GO_CELLULAR_RESPONSE_TO_NITROGEN_COMPOUND		305	-0.343396	-1.49496	0	0.112952	1	2133	tags=26%, list=18%, signal=31%
GO_NEGATIVE_REGULATION_OF_EPITHELIAL_CELL_APOPTOTIC_PROCESS	GO_NEGATIVE_REGULATION_OF_EPITHELIAL_CELL_APOPTOTIC_PROCESS		20	-0.54886	-1.49259	0.0481172	0.114629	1	760	tags=25%, list=7%, signal=27%
GO_POSITIVE_REGULATION_OF_INTRINSIC_APOPTOTIC_SIGNALING_PATHWAY	GO_POSITIVE_REGULATION_OF_INTRINSIC_APOPTOTIC_SIGNALING_PATHWAY		45	-0.457122	-1.49184	0.0354167	0.115023	1	1253	tags=22%, list=11%, signal=25%
GO_NEGATIVE_REGULATION_OF_HOMEOSTATIC_PROCESS	GO_NEGATIVE_REGULATION_OF_HOMEOSTATIC_PROCESS		89	-0.401745	-1.49178	0.00909091	0.114879	1	2136	tags=29%, list=18%, signal=36%
GO_REGULATION_OF_T_CELL_MIGRATION	GO_REGULATION_OF_T_CELL_MIGRATION		15	-0.573519	-1.49158	0.0603622	0.114833	1	1819	tags=47%, list=16%, signal=55%
GO_CATION_TRANSPORT	GO_CATION_TRANSPORT		379	-0.332212	-1.49129	0	0.1149	1	1483	tags=20%, list=13%, signal=22%
GO_IMPORT_INTO_CELL	GO_IMPORT_INTO_CELL		22	-0.521898	-1.49101	0.0376569	0.114919	1	1422	tags=27%, list=12%, signal=31%
GO_SMAD_PROTEIN_SIGNAL_TRANSDUCTION	GO_SMAD_PROTEIN_SIGNAL_TRANSDUCTION		22	-0.545999	-1.49064	0.0508475	0.115019	1	878	tags=23%, list=8%, signal=25%
GO_REGULATION_OF_CALCIUM_ION_IMPORT	GO_REGULATION_OF_CALCIUM_ION_IMPORT		52	-0.447446	-1.4905	0.0175439	0.114933	1	2812	tags=40%, list=24%, signal=53%
GO_UNSATURATED_FATTY_ACID_METABOLIC_PROCESS	GO_UNSATURATED_FATTY_ACID_METABOLIC_PROCESS		51	-0.435672	-1.48985	0.0246085	0.115344	1	1250	tags=25%, list=11%, signal=28%
GO_NEGATIVE_REGULATION_OF_MAP_KINASE_ACTIVITY	GO_NEGATIVE_REGULATION_OF_MAP_KINASE_ACTIVITY		54	-0.440442	-1.4897	0.0258621	0.115248	1	1095	tags=22%, list=9%, signal=24%
GO_POSITIVE_REGULATION_OF_PROTEIN_IMPORT	GO_POSITIVE_REGULATION_OF_PROTEIN_IMPORT		72	-0.410327	-1.48864	0.012	0.115903	1	1741	tags=29%, list=15%, signal=34%
GO_PROTEIN_COMPLEX_INVOLVED_IN_CELL_ADHESION	GO_PROTEIN_COMPLEX_INVOLVED_IN_CELL_ADHESION		21	-0.531464	-1.48567	0.0420842	0.118219	1	346	tags=29%, list=3%, signal=29%
GO_BIOMINERAL_TISSUE_DEVELOPMENT	GO_BIOMINERAL_TISSUE_DEVELOPMENT		32	-0.493305	-1.48512	0.039749	0.118477	1	2131	tags=41%, list=18%, signal=50%
GO_REGULATION_OF_RENAL_SYSTEM_PROCESS	GO_REGULATION_OF_RENAL_SYSTEM_PROCESS		15	-0.57187	-1.48406	0.0528541	0.119186	1	1353	tags=27%, list=12%, signal=30%
GO_POSITIVE_REGULATION_OF_T_CELL_MEDIATED_IMMUNITY	GO_POSITIVE_REGULATION_OF_T_CELL_MEDIATED_IMMUNITY		27	-0.509995	-1.48389	0.0555556	0.119139	1	884	tags=26%, list=8%, signal=28%
GO_PLATELET_ACTIVATION	GO_PLATELET_ACTIVATION		91	-0.398893	-1.48372	0.0144928	0.11908	1	2055	tags=34%, list=18%, signal=41%
GO_RESPONSE_TO_DRUG	GO_RESPONSE_TO_DRUG		261	-0.343351	-1.48301	0	0.119474	1	1030	tags=17%, list=9%, signal=18%
GO_POSITIVE_REGULATION_OF_EPIDERMIS_DEVELOPMENT	GO_POSITIVE_REGULATION_OF_EPIDERMIS_DEVELOPMENT		17	-0.564245	-1.4822	0.039916	0.119975	1	18	tags=12%, list=0%, signal=12%
GO_PEPTIDYL_TYROSINE_MODIFICATION	GO_PEPTIDYL_TYROSINE_MODIFICATION		110	-0.382471	-1.48207	0.0063425	0.119873	1	2226	tags=32%, list=19%, signal=39%
GO_RENAL_SYSTEM_PROCESS	GO_RENAL_SYSTEM_PROCESS		46	-0.451205	-1.48187	0.0327198	0.119822	1	1353	tags=22%, list=12%, signal=25%
GO_IMMUNOLOGICAL_SYNAPSE	GO_IMMUNOLOGICAL_SYNAPSE		25	-0.519751	-1.48177	0.0367965	0.119706	1	1425	tags=24%, list=12%, signal=27%
GO_RESPONSE_TO_CALCIUM_ION	GO_RESPONSE_TO_CALCIUM_ION		70	-0.414746	-1.4809	0.0151515	0.120304	1	936	tags=24%, list=8%, signal=26%
GO_REGULATION_OF_JUN_KINASE_ACTIVITY	GO_REGULATION_OF_JUN_KINASE_ACTIVITY		59	-0.426819	-1.48086	0.0105708	0.120146	1	1337	tags=22%, list=12%, signal=25%
GO_REGULATION_OF_NEURON_DEATH	GO_REGULATION_OF_NEURON_DEATH		159	-0.360622	-1.47984	0.00406504	0.120835	1	1053	tags=16%, list=9%, signal=18%
GO_REGULATION_OF_INTERLEUKIN_2_PRODUCTION	GO_REGULATION_OF_INTERLEUKIN_2_PRODUCTION		37	-0.47344	-1.47962	0.0426439	0.120804	1	1275	tags=27%, list=11%, signal=30%
GO_FATTY_ACID_DERIVATIVE_METABOLIC_PROCESS	GO_FATTY_ACID_DERIVATIVE_METABOLIC_PROCESS		41	-0.457107	-1.47962	0.0341365	0.120593	1	1183	tags=27%, list=10%, signal=30%
GO_REGULATION_OF_RESPONSE_TO_REACTIVE_OXYGEN_SPECIES	GO_REGULATION_OF_RESPONSE_TO_REACTIVE_OXYGEN_SPECIES		23	-0.521802	-1.47961	0.0365854	0.12039	1	73	tags=9%, list=1%, signal=9%
GO_REGULATION_OF_PROTEIN_TYROSINE_KINASE_ACTIVITY	GO_REGULATION_OF_PROTEIN_TYROSINE_KINASE_ACTIVITY		38	-0.465071	-1.47851	0.0386179	0.121132	1	2125	tags=37%, list=18%, signal=45%
GO_POSITIVE_T_CELL_SELECTION	GO_POSITIVE_T_CELL_SELECTION		15	-0.584825	-1.47804	0.064877	0.121363	1	1002	tags=33%, list=9%, signal=36%
GO_REGULATION_OF_RECEPTOR_ACTIVITY	GO_REGULATION_OF_RECEPTOR_ACTIVITY		61	-0.422692	-1.47737	0.02079	0.121718	1	2181	tags=34%, list=19%, signal=42%
GO_ENDOPLASMIC_RETICULUM_GOLGI_INTERMEDIATE_COMPARTMENT	GO_ENDOPLASMIC_RETICULUM_GOLGI_INTERMEDIATE_COMPARTMENT		80	-0.405542	-1.47679	0.0163599	0.121951	1	1780	tags=28%, list=15%, signal=32%
GO_RESPIRATORY_SYSTEM_DEVELOPMENT	GO_RESPIRATORY_SYSTEM_DEVELOPMENT		107	-0.380212	-1.47655	0.0124481	0.121995	1	2677	tags=36%, list=23%, signal=46%
GO_VESICLE_MEMBRANE	GO_VESICLE_MEMBRANE		316	-0.333963	-1.4752	0	0.123044	1	1918	tags=25%, list=17%, signal=29%
GO_REGULATION_OF_FATTY_ACID_TRANSPORT	GO_REGULATION_OF_FATTY_ACID_TRANSPORT		16	-0.568767	-1.47471	0.0732759	0.123304	1	1156	tags=31%, list=10%, signal=35%
GO_METANEPHROS_DEVELOPMENT	GO_METANEPHROS_DEVELOPMENT		28	-0.497117	-1.47376	0.0456522	0.123918	1	1539	tags=29%, list=13%, signal=33%
GO_REGULATION_OF_APOPTOTIC_SIGNALING_PATHWAY	GO_REGULATION_OF_APOPTOTIC_SIGNALING_PATHWAY		268	-0.344063	-1.47254	0.00219298	0.124762	1	1102	tags=16%, list=10%, signal=18%
GO_TRANSFORMING_GROWTH_FACTOR_BETA_RECEPTOR_SIGNALING_PATHWAY	GO_TRANSFORMING_GROWTH_FACTOR_BETA_RECEPTOR_SIGNALING_PATHWAY		63	-0.418343	-1.47152	0.0282609	0.125472	1	2102	tags=29%, list=18%, signal=35%
GO_AMEBOIDAL_TYPE_CELL_MIGRATION	GO_AMEBOIDAL_TYPE_CELL_MIGRATION		81	-0.397044	-1.47151	0.0254237	0.125266	1	1822	tags=27%, list=16%, signal=32%
GO_REGULATION_OF_TRANSMEMBRANE_TRANSPORT	GO_REGULATION_OF_TRANSMEMBRANE_TRANSPORT		180	-0.357108	-1.47149	0	0.125087	1	1865	tags=22%, list=16%, signal=26%
GO_NEGATIVE_REGULATION_OF_PRODUCTION_OF_MOLECULAR_MEDIATOR_OF_IMMUNE_RESPONSE	GO_NEGATIVE_REGULATION_OF_PRODUCTION_OF_MOLECULAR_MEDIATOR_OF_IMMUNE_RESPONSE		16	-0.569831	-1.47114	0.0656371	0.125226	1	760	tags=31%, list=7%, signal=33%
GO_TUMOR_NECROSIS_FACTOR_RECEPTOR_BINDING	GO_TUMOR_NECROSIS_FACTOR_RECEPTOR_BINDING		25	-0.51348	-1.46839	0.0602151	0.127514	1	1613	tags=36%, list=14%, signal=42%
GO_RESPONSE_TO_OXYGEN_LEVELS	GO_RESPONSE_TO_OXYGEN_LEVELS		202	-0.350103	-1.46707	0.00214592	0.128458	1	1756	tags=23%, list=15%, signal=26%
GO_REGULATION_OF_GLIAL_CELL_PROLIFERATION	GO_REGULATION_OF_GLIAL_CELL_PROLIFERATION		16	-0.573622	-1.46679	0.0545455	0.128525	1	2513	tags=50%, list=22%, signal=64%
GO_POSITIVE_REGULATION_OF_PROTEIN_TYROSINE_KINASE_ACTIVITY	GO_POSITIVE_REGULATION_OF_PROTEIN_TYROSINE_KINASE_ACTIVITY		19	-0.537379	-1.4664	0.0599613	0.128655	1	1857	tags=37%, list=16%, signal=44%
GO_TRANSFORMING_GROWTH_FACTOR_BETA_RECEPTOR_BINDING	GO_TRANSFORMING_GROWTH_FACTOR_BETA_RECEPTOR_BINDING		19	-0.553952	-1.46633	0.0698198	0.128507	1	240	tags=16%, list=2%, signal=16%
GO_POSITIVE_REGULATION_OF_ACTIVATED_T_CELL_PROLIFERATION	GO_POSITIVE_REGULATION_OF_ACTIVATED_T_CELL_PROLIFERATION		18	-0.558121	-1.46633	0.0642398	0.12829	1	2283	tags=50%, list=20%, signal=62%
GO_UBIQUITIN_DEPENDENT_PROTEIN_CATABOLIC_PROCESS_VIA_THE_MULTIVESICULAR_BODY_SORTING_PATHWAY	GO_UBIQUITIN_DEPENDENT_PROTEIN_CATABOLIC_PROCESS_VIA_THE_MULTIVESICULAR_BODY_SORTING_PATHWAY		16	-0.572871	-1.46608	0.0662526	0.128301	1	1500	tags=25%, list=13%, signal=29%
GO_ANTIGEN_PROCESSING_AND_PRESENTATION_OF_EXOGENOUS_PEPTIDE_ANTIGEN_VIA_MHC_CLASS_I	GO_ANTIGEN_PROCESSING_AND_PRESENTATION_OF_EXOGENOUS_PEPTIDE_ANTIGEN_VIA_MHC_CLASS_I		61	-0.427253	-1.46503	0.0178971	0.128992	1	1216	tags=23%, list=11%, signal=26%
GO_NEGATIVE_REGULATION_OF_LIPID_METABOLIC_PROCESS	GO_NEGATIVE_REGULATION_OF_LIPID_METABOLIC_PROCESS		43	-0.444828	-1.46435	0.0401786	0.129319	1	1262	tags=19%, list=11%, signal=21%
GO_NEGATIVE_REGULATION_OF_LOCOMOTION	GO_NEGATIVE_REGULATION_OF_LOCOMOTION		144	-0.364491	-1.46395	0.00208768	0.129534	1	2283	tags=30%, list=20%, signal=37%
GO_POSITIVE_REGULATION_OF_CELL_MORPHOGENESIS_INVOLVED_IN_DIFFERENTIATION	GO_POSITIVE_REGULATION_OF_CELL_MORPHOGENESIS_INVOLVED_IN_DIFFERENTIATION		98	-0.384665	-1.46099	0.0132743	0.131902	1	2230	tags=28%, list=19%, signal=34%
GO_PHOSPHOLIPASE_ACTIVITY	GO_PHOSPHOLIPASE_ACTIVITY		47	-0.44218	-1.46096	0.0509804	0.131717	1	2259	tags=36%, list=20%, signal=45%
GO_REGULATION_OF_CELL_DEVELOPMENT	GO_REGULATION_OF_CELL_DEVELOPMENT		452	-0.319968	-1.4608	0	0.131648	1	2405	tags=27%, list=21%, signal=33%
GO_ENDOCYTIC_VESICLE_MEMBRANE	GO_ENDOCYTIC_VESICLE_MEMBRANE		96	-0.392222	-1.45967	0.00888889	0.132494	1	2328	tags=34%, list=20%, signal=43%
GO_NEGATIVE_REGULATION_OF_GROWTH	GO_NEGATIVE_REGULATION_OF_GROWTH		134	-0.367527	-1.45916	0.00877193	0.132745	1	1541	tags=20%, list=13%, signal=23%
GO_CYTOPLASMIC_VESICLE_PART	GO_CYTOPLASMIC_VESICLE_PART		339	-0.331169	-1.45889	0	0.132768	1	2328	tags=29%, list=20%, signal=35%
GO_ACTIVATING_TRANSCRIPTION_FACTOR_BINDING	GO_ACTIVATING_TRANSCRIPTION_FACTOR_BINDING		42	-0.452751	-1.45837	0.0492126	0.13305	1	2421	tags=33%, list=21%, signal=42%
GO_REGULATION_OF_T_CELL_MEDIATED_IMMUNITY	GO_REGULATION_OF_T_CELL_MEDIATED_IMMUNITY		42	-0.441948	-1.45834	0.0452675	0.132867	1	884	tags=21%, list=8%, signal=23%
GO_PLASMA_MEMBRANE_ORGANIZATION	GO_PLASMA_MEMBRANE_ORGANIZATION		131	-0.370433	-1.45829	0.00877193	0.132692	1	2309	tags=27%, list=20%, signal=34%
GO_REGULATION_OF_BIOMINERAL_TISSUE_DEVELOPMENT	GO_REGULATION_OF_BIOMINERAL_TISSUE_DEVELOPMENT		35	-0.471603	-1.45816	0.0408998	0.132571	1	2131	tags=34%, list=18%, signal=42%
GO_ACTIN_FILAMENT_BUNDLE_ORGANIZATION	GO_ACTIN_FILAMENT_BUNDLE_ORGANIZATION		33	-0.470028	-1.4565	0.0467091	0.133936	1	1822	tags=36%, list=16%, signal=43%
GO_TRANSFERASE_ACTIVITY_TRANSFERRING_PENTOSYL_GROUPS	GO_TRANSFERASE_ACTIVITY_TRANSFERRING_PENTOSYL_GROUPS		42	-0.449929	-1.45642	0.0323232	0.133785	1	1316	tags=29%, list=11%, signal=32%
GO_CELLULAR_GLUCOSE_HOMEOSTASIS	GO_CELLULAR_GLUCOSE_HOMEOSTASIS		45	-0.440179	-1.45587	0.0376569	0.134066	1	983	tags=22%, list=8%, signal=24%
GO_RESPONSE_TO_CARBOHYDRATE	GO_RESPONSE_TO_CARBOHYDRATE		95	-0.388203	-1.45574	0.0133929	0.133956	1	1615	tags=24%, list=14%, signal=28%
GO_TUBE_DEVELOPMENT	GO_TUBE_DEVELOPMENT		298	-0.334871	-1.45546	0	0.13403	1	1615	tags=19%, list=14%, signal=22%
GO_CELL_LEADING_EDGE	GO_CELL_LEADING_EDGE		236	-0.341407	-1.455	0	0.134279	1	2168	tags=26%, list=19%, signal=32%
GO_CELLULAR_RESPONSE_TO_BIOTIC_STIMULUS	GO_CELLULAR_RESPONSE_TO_BIOTIC_STIMULUS		116	-0.379912	-1.45434	0.0172786	0.13466	1	1551	tags=26%, list=13%, signal=30%
GO_REGULATION_OF_EPIDERMIS_DEVELOPMENT	GO_REGULATION_OF_EPIDERMIS_DEVELOPMENT		34	-0.469473	-1.45293	0.0493827	0.135687	1	2648	tags=41%, list=23%, signal=53%
GO_REGULATION_OF_RESPONSE_TO_INTERFERON_GAMMA	GO_REGULATION_OF_RESPONSE_TO_INTERFERON_GAMMA		21	-0.523543	-1.45274	0.0762712	0.135618	1	663	tags=19%, list=6%, signal=20%
GO_NEGATIVE_REGULATION_OF_RESPONSE_TO_BIOTIC_STIMULUS	GO_NEGATIVE_REGULATION_OF_RESPONSE_TO_BIOTIC_STIMULUS		20	-0.537623	-1.45254	0.0675381	0.135573	1	767	tags=25%, list=7%, signal=27%
GO_POSITIVE_REGULATION_OF_MONOOXYGENASE_ACTIVITY	GO_POSITIVE_REGULATION_OF_MONOOXYGENASE_ACTIVITY		19	-0.54911	-1.45254	0.0671785	0.135357	1	291	tags=16%, list=3%, signal=16%
GO_POSITIVE_REGULATION_OF_ENDOCYTOSIS	GO_POSITIVE_REGULATION_OF_ENDOCYTOSIS		65	-0.415205	-1.45185	0.0201207	0.135838	1	1088	tags=23%, list=9%, signal=25%
GO_REGULATION_OF_RELEASE_OF_SEQUESTERED_CALCIUM_ION_INTO_CYTOSOL	GO_REGULATION_OF_RELEASE_OF_SEQUESTERED_CALCIUM_ION_INTO_CYTOSOL		40	-0.44665	-1.45145	0.0232068	0.136015	1	2812	tags=43%, list=24%, signal=56%
GO_POSITIVE_REGULATION_OF_MAP_KINASE_ACTIVITY	GO_POSITIVE_REGULATION_OF_MAP_KINASE_ACTIVITY		131	-0.370441	-1.45137	0.012987	0.135881	1	1822	tags=21%, list=16%, signal=25%
GO_HSP90_PROTEIN_BINDING	GO_HSP90_PROTEIN_BINDING		20	-0.518759	-1.45121	0.0505495	0.135773	1	983	tags=25%, list=8%, signal=27%
GO_REGULATION_OF_EXTRINSIC_APOPTOTIC_SIGNALING_PATHWAY	GO_REGULATION_OF_EXTRINSIC_APOPTOTIC_SIGNALING_PATHWAY		103	-0.37961	-1.4508	0.00207039	0.135931	1	1821	tags=25%, list=16%, signal=30%
GO_REGULATION_OF_NEUROTRANSMITTER_SECRETION	GO_REGULATION_OF_NEUROTRANSMITTER_SECRETION		27	-0.484112	-1.45066	0.0520607	0.135876	1	1439	tags=26%, list=12%, signal=30%
GO_POSITIVE_REGULATION_OF_JUN_KINASE_ACTIVITY	GO_POSITIVE_REGULATION_OF_JUN_KINASE_ACTIVITY		48	-0.430854	-1.45023	0.041841	0.13608	1	1294	tags=23%, list=11%, signal=26%
GO_REGULATION_OF_NUCLEASE_ACTIVITY	GO_REGULATION_OF_NUCLEASE_ACTIVITY		20	-0.529445	-1.44997	0.0603448	0.13612	1	1095	tags=30%, list=9%, signal=33%
GO_MULTI_MULTICELLULAR_ORGANISM_PROCESS	GO_MULTI_MULTICELLULAR_ORGANISM_PROCESS		116	-0.376596	-1.44955	0.00873363	0.136334	1	1547	tags=23%, list=13%, signal=27%
GO_REGULATION_OF_VESICLE_FUSION	GO_REGULATION_OF_VESICLE_FUSION		43	-0.455527	-1.44901	0.0438597	0.136611	1	1951	tags=30%, list=17%, signal=36%
GO_NEGATIVE_REGULATION_OF_CELL_DIFFERENTIATION	GO_NEGATIVE_REGULATION_OF_CELL_DIFFERENTIATION		307	-0.329528	-1.44885	0.0021978	0.136536	1	1901	tags=23%, list=16%, signal=27%
GO_REGULATION_OF_NATURAL_KILLER_CELL_ACTIVATION	GO_REGULATION_OF_NATURAL_KILLER_CELL_ACTIVATION		19	-0.520892	-1.44852	0.0764192	0.136618	1	1546	tags=42%, list=13%, signal=49%
GO_NEGATIVE_REGULATION_OF_LIPID_STORAGE	GO_NEGATIVE_REGULATION_OF_LIPID_STORAGE		15	-0.556337	-1.44751	0.0655738	0.137366	1	530	tags=20%, list=5%, signal=21%
GO_REGULATION_OF_VESICLE_MEDIATED_TRANSPORT	GO_REGULATION_OF_VESICLE_MEDIATED_TRANSPORT		280	-0.337742	-1.4472	0	0.137497	1	1197	tags=16%, list=10%, signal=18%
GO_INTEGRIN_MEDIATED_SIGNALING_PATHWAY	GO_INTEGRIN_MEDIATED_SIGNALING_PATHWAY		60	-0.417585	-1.44714	0.0316456	0.137325	1	596	tags=22%, list=5%, signal=23%
GO_RESPONSE_TO_ZINC_ION	GO_RESPONSE_TO_ZINC_ION		33	-0.472348	-1.44703	0.0565217	0.137226	1	856	tags=21%, list=7%, signal=23%
GO_REGULATION_OF_RYANODINE_SENSITIVE_CALCIUM_RELEASE_CHANNEL_ACTIVITY	GO_REGULATION_OF_RYANODINE_SENSITIVE_CALCIUM_RELEASE_CHANNEL_ACTIVITY		15	-0.565817	-1.44663	0.0694737	0.137356	1	2107	tags=33%, list=18%, signal=41%
GO_RELEASE_OF_CYTOCHROME_C_FROM_MITOCHONDRIA	GO_RELEASE_OF_CYTOCHROME_C_FROM_MITOCHONDRIA		17	-0.546849	-1.44653	0.0604839	0.137225	1	1002	tags=35%, list=9%, signal=39%
GO_T_CELL_RECEPTOR_SIGNALING_PATHWAY	GO_T_CELL_RECEPTOR_SIGNALING_PATHWAY		124	-0.364339	-1.44646	0.00809717	0.13707	1	2328	tags=27%, list=20%, signal=34%
GO_RECYCLING_ENDOSOME	GO_RECYCLING_ENDOSOME		91	-0.386843	-1.44538	0.0177384	0.137913	1	1425	tags=19%, list=12%, signal=21%
GO_REGULATION_OF_INSULIN_SECRETION_INVOLVED_IN_CELLULAR_RESPONSE_TO_GLUCOSE_STIMULUS	GO_REGULATION_OF_INSULIN_SECRETION_INVOLVED_IN_CELLULAR_RESPONSE_TO_GLUCOSE_STIMULUS		26	-0.495849	-1.44524	0.0714286	0.137803	1	1615	tags=31%, list=14%, signal=36%
GO_POSITIVE_REGULATION_OF_NEURON_DIFFERENTIATION	GO_POSITIVE_REGULATION_OF_NEURON_DIFFERENTIATION		157	-0.357868	-1.44425	0.0041841	0.138461	1	2115	tags=26%, list=18%, signal=32%
GO_ALDITOL_PHOSPHATE_METABOLIC_PROCESS	GO_ALDITOL_PHOSPHATE_METABOLIC_PROCESS		21	-0.521188	-1.44419	0.0642398	0.138288	1	1576	tags=29%, list=14%, signal=33%
GO_MYELOID_LEUKOCYTE_DIFFERENTIATION	GO_MYELOID_LEUKOCYTE_DIFFERENTIATION		66	-0.408204	-1.4437	0.0181452	0.138517	1	1870	tags=29%, list=16%, signal=34%
GO_BASAL_PART_OF_CELL	GO_BASAL_PART_OF_CELL		26	-0.486436	-1.44359	0.0675105	0.138394	1	2755	tags=42%, list=24%, signal=55%
GO_CELLULAR_RESPONSE_TO_GAMMA_RADIATION	GO_CELLULAR_RESPONSE_TO_GAMMA_RADIATION		15	-0.576172	-1.44298	0.0636943	0.138826	1	69	tags=13%, list=1%, signal=13%
GO_THREONINE_TYPE_PEPTIDASE_ACTIVITY	GO_THREONINE_TYPE_PEPTIDASE_ACTIVITY		18	-0.528533	-1.44285	0.0738523	0.138762	1	2147	tags=33%, list=19%, signal=41%
GO_TUMOR_NECROSIS_FACTOR_RECEPTOR_SUPERFAMILY_BINDING	GO_TUMOR_NECROSIS_FACTOR_RECEPTOR_SUPERFAMILY_BINDING		36	-0.458185	-1.44092	0.0492126	0.140358	1	1613	tags=28%, list=14%, signal=32%
GO_REGULATION_OF_SYNAPTIC_VESICLE_TRANSPORT	GO_REGULATION_OF_SYNAPTIC_VESICLE_TRANSPORT		20	-0.53105	-1.44091	0.062753	0.140152	1	1439	tags=25%, list=12%, signal=28%
GO_LUNG_MORPHOGENESIS	GO_LUNG_MORPHOGENESIS		27	-0.496486	-1.44058	0.0583153	0.140275	1	2610	tags=41%, list=23%, signal=52%
GO_GOLGI_STACK	GO_GOLGI_STACK		95	-0.383647	-1.44053	0.00795229	0.140108	1	1780	tags=26%, list=15%, signal=31%
GO_RESPONSE_TO_ACID_CHEMICAL	GO_RESPONSE_TO_ACID_CHEMICAL		179	-0.350213	-1.44042	0.00849257	0.140019	1	2018	tags=25%, list=17%, signal=30%
GO_NECROPTOTIC_PROCESS	GO_NECROPTOTIC_PROCESS		16	-0.549176	-1.43891	0.0625	0.141234	1	1608	tags=31%, list=14%, signal=36%
GO_SOLUTE_PROTON_SYMPORTER_ACTIVITY	GO_SOLUTE_PROTON_SYMPORTER_ACTIVITY		15	-0.552276	-1.43729	0.0700637	0.142698	1	1157	tags=40%, list=10%, signal=44%
GO_AMINOGLYCAN_METABOLIC_PROCESS	GO_AMINOGLYCAN_METABOLIC_PROCESS		84	-0.392539	-1.43657	0.0231579	0.143097	1	1604	tags=26%, list=14%, signal=30%
GO_NEGATIVE_CHEMOTAXIS	GO_NEGATIVE_CHEMOTAXIS		19	-0.539957	-1.43635	0.0758929	0.143116	1	624	tags=26%, list=5%, signal=28%
GO_MOVEMENT_IN_ENVIRONMENT_OF_OTHER_ORGANISM_INVOLVED_IN_SYMBIOTIC_INTERACTION	GO_MOVEMENT_IN_ENVIRONMENT_OF_OTHER_ORGANISM_INVOLVED_IN_SYMBIOTIC_INTERACTION		53	-0.426811	-1.4358	0.0439122	0.14342	1	1352	tags=32%, list=12%, signal=36%
GO_NEGATIVE_REGULATION_OF_PEPTIDE_SECRETION	GO_NEGATIVE_REGULATION_OF_PEPTIDE_SECRETION		22	-0.507435	-1.43564	0.0699153	0.143351	1	2617	tags=45%, list=23%, signal=59%
GO_NEGATIVE_REGULATION_OF_NEURON_APOPTOTIC_PROCESS	GO_NEGATIVE_REGULATION_OF_NEURON_APOPTOTIC_PROCESS		73	-0.401288	-1.43507	0.0261438	0.143654	1	1053	tags=22%, list=9%, signal=24%
GO_POSITIVE_REGULATION_OF_TRANSCRIPTION_FROM_RNA_POLYMERASE_II_PROMOTER_IN_RESPONSE_TO_STRESS	GO_POSITIVE_REGULATION_OF_TRANSCRIPTION_FROM_RNA_POLYMERASE_II_PROMOTER_IN_RESPONSE_TO_STRESS		19	-0.534928	-1.43502	0.0783505	0.143482	1	1038	tags=32%, list=9%, signal=35%
GO_EARLY_ENDOSOME_MEMBRANE	GO_EARLY_ENDOSOME_MEMBRANE		79	-0.397832	-1.43475	0.0269151	0.143538	1	1737	tags=27%, list=15%, signal=31%
GO_REGULATION_OF_GROWTH	GO_REGULATION_OF_GROWTH		375	-0.32042	-1.43436	0	0.14372	1	1601	tags=19%, list=14%, signal=21%
GO_NEGATIVE_REGULATION_OF_NEURON_DIFFERENTIATION	GO_NEGATIVE_REGULATION_OF_NEURON_DIFFERENTIATION		100	-0.378689	-1.43398	0.0147059	0.143866	1	1588	tags=24%, list=14%, signal=28%
GO_CELLULAR_RESPONSE_TO_KETONE	GO_CELLULAR_RESPONSE_TO_KETONE		46	-0.431155	-1.43227	0.036961	0.145397	1	1289	tags=24%, list=11%, signal=27%
GO_MUSCLE_STRUCTURE_DEVELOPMENT	GO_MUSCLE_STRUCTURE_DEVELOPMENT		225	-0.341773	-1.43218	0.0021978	0.145278	1	1614	tags=22%, list=14%, signal=25%
GO_POSITIVE_REGULATION_OF_AXON_EXTENSION	GO_POSITIVE_REGULATION_OF_AXON_EXTENSION		22	-0.504474	-1.43081	0.0751566	0.14644	1	2230	tags=50%, list=19%, signal=62%
GO_STEROL_HOMEOSTASIS	GO_STEROL_HOMEOSTASIS		32	-0.464069	-1.43046	0.0533597	0.146514	1	964	tags=19%, list=8%, signal=20%
GO_NEGATIVE_REGULATION_OF_INTERFERON_GAMMA_PRODUCTION	GO_NEGATIVE_REGULATION_OF_INTERFERON_GAMMA_PRODUCTION		22	-0.513019	-1.43018	0.0634615	0.146556	1	2328	tags=50%, list=20%, signal=62%
GO_RESPONSE_TO_HEAT	GO_RESPONSE_TO_HEAT		53	-0.424795	-1.43014	0.0387931	0.14638	1	552	tags=13%, list=5%, signal=14%
GO_NEGATIVE_REGULATION_OF_PHOSPHORYLATION	GO_NEGATIVE_REGULATION_OF_PHOSPHORYLATION		266	-0.327282	-1.42933	0.00208768	0.146984	1	1349	tags=17%, list=12%, signal=19%
GO_BASOLATERAL_PLASMA_MEMBRANE	GO_BASOLATERAL_PLASMA_MEMBRANE		105	-0.379122	-1.42882	0.0236559	0.147322	1	1547	tags=25%, list=13%, signal=28%
GO_FC_GAMMA_RECEPTOR_SIGNALING_PATHWAY	GO_FC_GAMMA_RECEPTOR_SIGNALING_PATHWAY		64	-0.406953	-1.42824	0.0268595	0.147646	1	2352	tags=34%, list=20%, signal=43%
GO_DEFENSE_RESPONSE_TO_OTHER_ORGANISM	GO_DEFENSE_RESPONSE_TO_OTHER_ORGANISM		272	-0.329518	-1.42788	0.00457666	0.147773	1	1576	tags=22%, list=14%, signal=25%
GO_POSITIVE_REGULATION_OF_KINASE_ACTIVITY	GO_POSITIVE_REGULATION_OF_KINASE_ACTIVITY		313	-0.322951	-1.42691	0	0.148515	1	1766	tags=20%, list=15%, signal=23%
GO_PHOSPHATIDYLINOSITOL_3_KINASE_BINDING	GO_PHOSPHATIDYLINOSITOL_3_KINASE_BINDING		17	-0.546762	-1.42653	0.06875	0.148674	1	636	tags=29%, list=5%, signal=31%
GO_REGULATION_OF_JNK_CASCADE	GO_REGULATION_OF_JNK_CASCADE		113	-0.367345	-1.42587	0.00646552	0.149082	1	1349	tags=21%, list=12%, signal=24%
GO_MULTICELLULAR_ORGANISMAL_HOMEOSTASIS	GO_MULTICELLULAR_ORGANISMAL_HOMEOSTASIS		138	-0.361609	-1.42557	0.0130719	0.149192	1	1623	tags=22%, list=14%, signal=26%
GO_CELLULAR_RESPONSE_TO_AMINO_ACID_STARVATION	GO_CELLULAR_RESPONSE_TO_AMINO_ACID_STARVATION		21	-0.522012	-1.42556	0.0611814	0.148982	1	1943	tags=38%, list=17%, signal=46%
GO_GTPASE_ACTIVITY	GO_GTPASE_ACTIVITY		177	-0.346124	-1.42488	0.00417537	0.149475	1	1842	tags=23%, list=16%, signal=27%
GO_NEGATIVE_REGULATION_OF_CELL_PROLIFERATION	GO_NEGATIVE_REGULATION_OF_CELL_PROLIFERATION		393	-0.317882	-1.42461	0	0.149547	1	1940	tags=20%, list=17%, signal=23%
GO_REGULATION_OF_EMBRYONIC_DEVELOPMENT	GO_REGULATION_OF_EMBRYONIC_DEVELOPMENT		52	-0.421575	-1.42412	0.0307377	0.149809	1	1599	tags=21%, list=14%, signal=24%
GO_ESC_E_Z_COMPLEX	GO_ESC_E_Z_COMPLEX		16	-0.538044	-1.42372	0.0833333	0.149936	1	2076	tags=38%, list=18%, signal=46%
GO_REGULATION_OF_IMMUNE_EFFECTOR_PROCESS	GO_REGULATION_OF_IMMUNE_EFFECTOR_PROCESS		287	-0.327098	-1.42249	0.00222222	0.15095	1	2153	tags=26%, list=19%, signal=32%
GO_REGULATION_OF_TRANSCRIPTION_FACTOR_IMPORT_INTO_NUCLEUS	GO_REGULATION_OF_TRANSCRIPTION_FACTOR_IMPORT_INTO_NUCLEUS		70	-0.398864	-1.42236	0.0317125	0.150833	1	1188	tags=19%, list=10%, signal=21%
GO_MUCOPOLYSACCHARIDE_METABOLIC_PROCESS	GO_MUCOPOLYSACCHARIDE_METABOLIC_PROCESS		57	-0.411972	-1.42235	0.0484848	0.150618	1	1604	tags=26%, list=14%, signal=30%
GO_REGULATION_OF_REACTIVE_OXYGEN_SPECIES_METABOLIC_PROCESS	GO_REGULATION_OF_REACTIVE_OXYGEN_SPECIES_METABOLIC_PROCESS		95	-0.379667	-1.42208	0.0153509	0.150662	1	1985	tags=29%, list=17%, signal=35%
GO_NEURON_MIGRATION	GO_NEURON_MIGRATION		48	-0.423089	-1.42121	0.0491453	0.151327	1	660	tags=17%, list=6%, signal=18%
GO_INTRINSIC_APOPTOTIC_SIGNALING_PATHWAY_IN_RESPONSE_TO_ENDOPLASMIC_RETICULUM_STRESS	GO_INTRINSIC_APOPTOTIC_SIGNALING_PATHWAY_IN_RESPONSE_TO_ENDOPLASMIC_RETICULUM_STRESS		27	-0.486396	-1.42115	0.0491453	0.151158	1	1260	tags=26%, list=11%, signal=29%
GO_RNA_POLYMERASE_II_ACTIVATING_TRANSCRIPTION_FACTOR_BINDING	GO_RNA_POLYMERASE_II_ACTIVATING_TRANSCRIPTION_FACTOR_BINDING		26	-0.485024	-1.421	0.0694737	0.151096	1	1977	tags=31%, list=17%, signal=37%
GO_REGULATION_OF_EXOCYTOSIS	GO_REGULATION_OF_EXOCYTOSIS		104	-0.370852	-1.42068	0.00840336	0.151242	1	1547	tags=20%, list=13%, signal=23%
GO_LIPID_PHOSPHORYLATION	GO_LIPID_PHOSPHORYLATION		63	-0.415532	-1.42049	0.0324675	0.151195	1	2331	tags=30%, list=20%, signal=38%
GO_HISTONE_ACETYLTRANSFERASE_BINDING	GO_HISTONE_ACETYLTRANSFERASE_BINDING		23	-0.494295	-1.41965	0.0615711	0.151826	1	174	tags=13%, list=2%, signal=13%
GO_NEPHRON_DEVELOPMENT	GO_NEPHRON_DEVELOPMENT		47	-0.430342	-1.419	0.0474227	0.152354	1	2353	tags=36%, list=20%, signal=45%
GO_DISULFIDE_OXIDOREDUCTASE_ACTIVITY	GO_DISULFIDE_OXIDOREDUCTASE_ACTIVITY		20	-0.506602	-1.41889	0.06917	0.152263	1	1920	tags=30%, list=17%, signal=36%
GO_RESPONSE_TO_OXIDATIVE_STRESS	GO_RESPONSE_TO_OXIDATIVE_STRESS		247	-0.330453	-1.41873	0.00211416	0.152194	1	1128	tags=17%, list=10%, signal=18%
GO_VASCULAR_PROCESS_IN_CIRCULATORY_SYSTEM	GO_VASCULAR_PROCESS_IN_CIRCULATORY_SYSTEM		71	-0.395116	-1.41832	0.0252632	0.152371	1	1748	tags=28%, list=15%, signal=33%
GO_POSITIVE_REGULATION_OF_PROTEIN_SERINE_THREONINE_KINASE_ACTIVITY	GO_POSITIVE_REGULATION_OF_PROTEIN_SERINE_THREONINE_KINASE_ACTIVITY		193	-0.341589	-1.41818	0.0110375	0.152261	1	1822	tags=20%, list=16%, signal=23%
GO_NEGATIVE_REGULATION_OF_DEFENSE_RESPONSE	GO_NEGATIVE_REGULATION_OF_DEFENSE_RESPONSE		86	-0.384931	-1.41816	0.0248447	0.152059	1	1483	tags=22%, list=13%, signal=25%
GO_REGULATION_OF_INTERFERON_ALPHA_PRODUCTION	GO_REGULATION_OF_INTERFERON_ALPHA_PRODUCTION		15	-0.548117	-1.41718	0.0747475	0.152859	1	760	tags=27%, list=7%, signal=29%
GO_REGULATION_OF_MEMBRANE_DEPOLARIZATION	GO_REGULATION_OF_MEMBRANE_DEPOLARIZATION		21	-0.51893	-1.41714	0.0910973	0.152691	1	1002	tags=24%, list=9%, signal=26%
GO_EXTRINSIC_COMPONENT_OF_CYTOPLASMIC_SIDE_OF_PLASMA_MEMBRANE	GO_EXTRINSIC_COMPONENT_OF_CYTOPLASMIC_SIDE_OF_PLASMA_MEMBRANE		62	-0.407056	-1.41692	0.0490798	0.152735	1	2309	tags=35%, list=20%, signal=44%
GO_POSITIVE_REGULATION_OF_NERVOUS_SYSTEM_DEVELOPMENT	GO_POSITIVE_REGULATION_OF_NERVOUS_SYSTEM_DEVELOPMENT		210	-0.33695	-1.41628	0.0151515	0.153127	1	2115	tags=27%, list=18%, signal=32%
GO_ENDOSOMAL_PART	GO_ENDOSOMAL_PART		327	-0.320804	-1.41619	0	0.152984	1	1500	tags=20%, list=13%, signal=23%
GO_REGULATION_OF_PEPTIDYL_THREONINE_PHOSPHORYLATION	GO_REGULATION_OF_PEPTIDYL_THREONINE_PHOSPHORYLATION		23	-0.496671	-1.41619	0.0757576	0.152768	1	2497	tags=39%, list=22%, signal=50%
GO_NEGATIVE_REGULATION_OF_DEVELOPMENTAL_PROCESS	GO_NEGATIVE_REGULATION_OF_DEVELOPMENTAL_PROCESS		407	-0.316497	-1.41599	0.00643777	0.152747	1	1924	tags=24%, list=17%, signal=27%
GO_EXTRINSIC_APOPTOTIC_SIGNALING_PATHWAY	GO_EXTRINSIC_APOPTOTIC_SIGNALING_PATHWAY		77	-0.387606	-1.41599	0.0206612	0.152531	1	1275	tags=19%, list=11%, signal=22%
GO_NEURON_PROJECTION_GUIDANCE	GO_NEURON_PROJECTION_GUIDANCE		84	-0.386251	-1.41528	0.027027	0.153008	1	2803	tags=37%, list=24%, signal=48%
GO_RESPONSE_TO_TRANSITION_METAL_NANOPARTICLE	GO_RESPONSE_TO_TRANSITION_METAL_NANOPARTICLE		91	-0.375981	-1.41486	0.0215983	0.153265	1	1014	tags=19%, list=9%, signal=20%
GO_CORE_PROMOTER_PROXIMAL_REGION_DNA_BINDING	GO_CORE_PROMOTER_PROXIMAL_REGION_DNA_BINDING		199	-0.339342	-1.41439	0.0128755	0.153464	1	1870	tags=23%, list=16%, signal=27%
GO_CYTOPLASMIC_SIDE_OF_MEMBRANE	GO_CYTOPLASMIC_SIDE_OF_MEMBRANE		118	-0.367799	-1.41272	0.00879121	0.15496	1	2309	tags=33%, list=20%, signal=41%
GO_NEGATIVE_REGULATION_OF_INNATE_IMMUNE_RESPONSE	GO_NEGATIVE_REGULATION_OF_INNATE_IMMUNE_RESPONSE		28	-0.479378	-1.41186	0.0655738	0.155553	1	1215	tags=29%, list=10%, signal=32%
GO_FATTY_ACID_BETA_OXIDATION_USING_ACYL_COA_DEHYDROGENASE	GO_FATTY_ACID_BETA_OXIDATION_USING_ACYL_COA_DEHYDROGENASE		15	-0.549825	-1.41183	0.0891473	0.155355	1	945	tags=27%, list=8%, signal=29%
GO_MEMBRANE_MICRODOMAIN	GO_MEMBRANE_MICRODOMAIN		181	-0.342132	-1.40981	0.00875273	0.157225	1	2130	tags=30%, list=18%, signal=37%
GO_POSITIVE_REGULATION_OF_CELLULAR_RESPONSE_TO_TRANSFORMING_GROWTH_FACTOR_BETA_STIMULUS	GO_POSITIVE_REGULATION_OF_CELLULAR_RESPONSE_TO_TRANSFORMING_GROWTH_FACTOR_BETA_STIMULUS		19	-0.519188	-1.40935	0.082495	0.157483	1	2935	tags=47%, list=25%, signal=63%
GO_EPITHELIUM_DEVELOPMENT	GO_EPITHELIUM_DEVELOPMENT		475	-0.311119	-1.40864	0	0.158035	1	1990	tags=24%, list=17%, signal=28%
GO_REGULATION_OF_WOUND_HEALING	GO_REGULATION_OF_WOUND_HEALING		62	-0.404697	-1.40806	0.0344086	0.158443	1	1519	tags=24%, list=13%, signal=28%
GO_POSITIVE_REGULATION_OF_RELEASE_OF_CYTOCHROME_C_FROM_MITOCHONDRIA	GO_POSITIVE_REGULATION_OF_RELEASE_OF_CYTOCHROME_C_FROM_MITOCHONDRIA		25	-0.484624	-1.40769	0.0764463	0.158587	1	528	tags=20%, list=5%, signal=21%
GO_PHAGOCYTIC_VESICLE	GO_PHAGOCYTIC_VESICLE		74	-0.39675	-1.40683	0.0316456	0.159292	1	1499	tags=27%, list=13%, signal=31%
GO_ANATOMICAL_STRUCTURE_FORMATION_INVOLVED_IN_MORPHOGENESIS	GO_ANATOMICAL_STRUCTURE_FORMATION_INVOLVED_IN_MORPHOGENESIS		500	-0.308189	-1.40678	0	0.159118	1	1892	tags=23%, list=16%, signal=26%
GO_CELL_MORPHOGENESIS_INVOLVED_IN_NEURON_DIFFERENTIATION	GO_CELL_MORPHOGENESIS_INVOLVED_IN_NEURON_DIFFERENTIATION		158	-0.346195	-1.40557	0.00660793	0.160118	1	2502	tags=30%, list=22%, signal=37%
GO_REGULATION_OF_TYPE_I_INTERFERON_MEDIATED_SIGNALING_PATHWAY	GO_REGULATION_OF_TYPE_I_INTERFERON_MEDIATED_SIGNALING_PATHWAY		24	-0.479997	-1.40465	0.0856531	0.16092	1	2379	tags=42%, list=21%, signal=52%
GO_POSITIVE_REGULATION_OF_MYELOID_CELL_DIFFERENTIATION	GO_POSITIVE_REGULATION_OF_MYELOID_CELL_DIFFERENTIATION		60	-0.40859	-1.40356	0.0345572	0.161884	1	2283	tags=35%, list=20%, signal=43%
GO_REGULATION_OF_AXONOGENESIS	GO_REGULATION_OF_AXONOGENESIS		88	-0.381311	-1.40346	0.0351967	0.161753	1	3231	tags=40%, list=28%, signal=55%
GO_CARBOHYDRATE_HOMEOSTASIS	GO_CARBOHYDRATE_HOMEOSTASIS		94	-0.372064	-1.40295	0.0246085	0.162031	1	1045	tags=17%, list=9%, signal=19%
GO_NEGATIVE_REGULATION_OF_LEUKOCYTE_DIFFERENTIATION	GO_NEGATIVE_REGULATION_OF_LEUKOCYTE_DIFFERENTIATION		45	-0.437009	-1.40284	0.0539957	0.161907	1	401	tags=16%, list=3%, signal=16%
GO_B_CELL_ACTIVATION	GO_B_CELL_ACTIVATION		91	-0.373792	-1.40255	0.0173536	0.162011	1	1965	tags=33%, list=17%, signal=39%
GO_CARTILAGE_DEVELOPMENT	GO_CARTILAGE_DEVELOPMENT		64	-0.396704	-1.40246	0.0258621	0.161899	1	1907	tags=25%, list=16%, signal=30%
GO_REGULATION_OF_NERVOUS_SYSTEM_DEVELOPMENT	GO_REGULATION_OF_NERVOUS_SYSTEM_DEVELOPMENT		383	-0.316448	-1.40157	0	0.162598	1	2125	tags=24%, list=18%, signal=28%
GO_REGULATION_OF_VASCULATURE_DEVELOPMENT	GO_REGULATION_OF_VASCULATURE_DEVELOPMENT		121	-0.360113	-1.40147	0.0143443	0.162479	1	1822	tags=24%, list=16%, signal=28%
GO_EXOCYTOSIS	GO_EXOCYTOSIS		180	-0.338218	-1.40114	0.0234542	0.162583	1	2137	tags=26%, list=18%, signal=32%
GO_SULFUR_COMPOUND_METABOLIC_PROCESS	GO_SULFUR_COMPOUND_METABOLIC_PROCESS		229	-0.330358	-1.40102	0.00228833	0.162487	1	1610	tags=22%, list=14%, signal=25%
GO_REGULATORY_REGION_NUCLEIC_ACID_BINDING	GO_REGULATORY_REGION_NUCLEIC_ACID_BINDING		480	-0.307964	-1.40093	0.00222222	0.162367	1	2257	tags=24%, list=19%, signal=29%
GO_RESPONSE_TO_STARVATION	GO_RESPONSE_TO_STARVATION		106	-0.364368	-1.40077	0.0266667	0.162284	1	2100	tags=26%, list=18%, signal=32%
GO_CARBOHYDRATE_METABOLIC_PROCESS	GO_CARBOHYDRATE_METABOLIC_PROCESS		414	-0.311129	-1.40005	0	0.162786	1	1615	tags=22%, list=14%, signal=24%
GO_VOLTAGE_GATED_CATION_CHANNEL_ACTIVITY	GO_VOLTAGE_GATED_CATION_CHANNEL_ACTIVITY		33	-0.462723	-1.40002	0.0618557	0.162591	1	2630	tags=45%, list=23%, signal=59%
GO_PROTEIN_TYROSINE_SERINE_THREONINE_PHOSPHATASE_ACTIVITY	GO_PROTEIN_TYROSINE_SERINE_THREONINE_PHOSPHATASE_ACTIVITY		38	-0.443853	-1.39971	0.0806794	0.162721	1	930	tags=24%, list=8%, signal=26%
GO_POSITIVE_REGULATION_OF_B_CELL_PROLIFERATION	GO_POSITIVE_REGULATION_OF_B_CELL_PROLIFERATION		27	-0.483024	-1.39885	0.0717213	0.163371	1	2214	tags=48%, list=19%, signal=59%
GO_PROTEIN_HOMODIMERIZATION_ACTIVITY	GO_PROTEIN_HOMODIMERIZATION_ACTIVITY		440	-0.311029	-1.3988	0	0.163185	1	1069	tags=16%, list=9%, signal=17%
GO_CELLULAR_RESPONSE_TO_EXTRACELLULAR_STIMULUS	GO_CELLULAR_RESPONSE_TO_EXTRACELLULAR_STIMULUS		133	-0.351712	-1.39879	0.0197802	0.162966	1	2074	tags=25%, list=18%, signal=30%
GO_POSITIVE_REGULATION_OF_AUTOPHAGY	GO_POSITIVE_REGULATION_OF_AUTOPHAGY		65	-0.393505	-1.39833	0.0480167	0.16326	1	2870	tags=35%, list=25%, signal=47%
GO_PROTEIN_KINASE_B_SIGNALING	GO_PROTEIN_KINASE_B_SIGNALING		23	-0.490976	-1.39814	0.0781563	0.163241	1	1843	tags=30%, list=16%, signal=36%
GO_RESPONSE_TO_REACTIVE_OXYGEN_SPECIES	GO_RESPONSE_TO_REACTIVE_OXYGEN_SPECIES		130	-0.352749	-1.39712	0.020316	0.164053	1	1542	tags=23%, list=13%, signal=26%
GO_REGULATION_OF_NF_KAPPAB_IMPORT_INTO_NUCLEUS	GO_REGULATION_OF_NF_KAPPAB_IMPORT_INTO_NUCLEUS		32	-0.450021	-1.39685	0.0682731	0.164124	1	1017	tags=22%, list=9%, signal=24%
GO_POSITIVE_REGULATION_OF_CYCLIN_DEPENDENT_PROTEIN_KINASE_ACTIVITY	GO_POSITIVE_REGULATION_OF_CYCLIN_DEPENDENT_PROTEIN_KINASE_ACTIVITY		24	-0.493478	-1.39626	0.0795699	0.164483	1	1566	tags=29%, list=14%, signal=34%
GO_T_CELL_SELECTION	GO_T_CELL_SELECTION		25	-0.479512	-1.39551	0.066	0.165046	1	1002	tags=32%, list=9%, signal=35%
GO_MEMBRANE_LIPID_BIOSYNTHETIC_PROCESS	GO_MEMBRANE_LIPID_BIOSYNTHETIC_PROCESS		77	-0.379471	-1.39551	0.0378947	0.164824	1	1235	tags=19%, list=11%, signal=22%
GO_PHAGOCYTIC_VESICLE_MEMBRANE	GO_PHAGOCYTIC_VESICLE_MEMBRANE		48	-0.426302	-1.39347	0.0547667	0.166753	1	1499	tags=29%, list=13%, signal=33%
GO_CIRCULATORY_SYSTEM_PROCESS	GO_CIRCULATORY_SYSTEM_PROCESS		164	-0.344345	-1.39202	0.00854701	0.168086	1	1601	tags=21%, list=14%, signal=24%
GO_MYELOID_CELL_DIFFERENTIATION	GO_MYELOID_CELL_DIFFERENTIATION		134	-0.352544	-1.39186	0.0229358	0.168017	1	1601	tags=21%, list=14%, signal=24%
GO_MESONEPHROS_DEVELOPMENT	GO_MESONEPHROS_DEVELOPMENT		35	-0.448737	-1.39088	0.0612245	0.168809	1	3367	tags=51%, list=29%, signal=72%
GO_LEUKOCYTE_APOPTOTIC_PROCESS	GO_LEUKOCYTE_APOPTOTIC_PROCESS		19	-0.505876	-1.39067	0.0861723	0.168845	1	530	tags=21%, list=5%, signal=22%
GO_LYSOSOME_LOCALIZATION	GO_LYSOSOME_LOCALIZATION		17	-0.527197	-1.39051	0.08	0.168794	1	1792	tags=24%, list=15%, signal=28%
GO_REGULATION_OF_OXIDATIVE_STRESS_INDUCED_CELL_DEATH	GO_REGULATION_OF_OXIDATIVE_STRESS_INDUCED_CELL_DEATH		33	-0.456182	-1.39038	0.0455446	0.16868	1	1105	tags=18%, list=10%, signal=20%
GO_RETROGRADE_PROTEIN_TRANSPORT_ER_TO_CYTOSOL	GO_RETROGRADE_PROTEIN_TRANSPORT_ER_TO_CYTOSOL		15	-0.525336	-1.38971	0.0963855	0.169223	1	383	tags=20%, list=3%, signal=21%
GO_ZYMOGEN_ACTIVATION	GO_ZYMOGEN_ACTIVATION		80	-0.383985	-1.38866	0.0384615	0.170115	1	636	tags=14%, list=5%, signal=14%
GO_NEGATIVE_REGULATION_OF_CATION_TRANSMEMBRANE_TRANSPORT	GO_NEGATIVE_REGULATION_OF_CATION_TRANSMEMBRANE_TRANSPORT		29	-0.465704	-1.38866	0.0796813	0.169893	1	585	tags=14%, list=5%, signal=14%
GO_REGULATION_OF_CYTOPLASMIC_TRANSPORT	GO_REGULATION_OF_CYTOPLASMIC_TRANSPORT		337	-0.318246	-1.38764	0.0045045	0.170753	1	1546	tags=20%, list=13%, signal=22%
GO_I_KAPPAB_KINASE_NF_KAPPAB_SIGNALING	GO_I_KAPPAB_KINASE_NF_KAPPAB_SIGNALING		61	-0.403729	-1.38734	0.048	0.170842	1	2268	tags=28%, list=20%, signal=34%
GO_FATTY_ACYL_COA_METABOLIC_PROCESS	GO_FATTY_ACYL_COA_METABOLIC_PROCESS		36	-0.448713	-1.3871	0.0506823	0.17087	1	1331	tags=28%, list=11%, signal=31%
GO_NEGATIVE_REGULATION_OF_CYTOPLASMIC_TRANSPORT	GO_NEGATIVE_REGULATION_OF_CYTOPLASMIC_TRANSPORT		84	-0.375617	-1.38685	0.0317797	0.170916	1	1365	tags=20%, list=12%, signal=23%
GO_NEGATIVE_REGULATION_OF_TRANSCRIPTION_FROM_RNA_POLYMERASE_II_PROMOTER	GO_NEGATIVE_REGULATION_OF_TRANSCRIPTION_FROM_RNA_POLYMERASE_II_PROMOTER		478	-0.303431	-1.38655	0	0.17099	1	1615	tags=19%, list=14%, signal=22%
GO_CORE_PROMOTER_BINDING	GO_CORE_PROMOTER_BINDING		109	-0.356714	-1.38654	0.0247748	0.170772	1	1756	tags=24%, list=15%, signal=28%
GO_MYELOID_CELL_DEVELOPMENT	GO_MYELOID_CELL_DEVELOPMENT		31	-0.454263	-1.38628	0.0711297	0.170808	1	2471	tags=39%, list=21%, signal=49%
GO_CELLULAR_RESPONSE_TO_ACID_CHEMICAL	GO_CELLULAR_RESPONSE_TO_ACID_CHEMICAL		94	-0.375597	-1.38624	0.0238095	0.170655	1	1543	tags=24%, list=13%, signal=28%
GO_POSITIVE_REGULATION_OF_FATTY_ACID_METABOLIC_PROCESS	GO_POSITIVE_REGULATION_OF_FATTY_ACID_METABOLIC_PROCESS		16	-0.539714	-1.3861	0.095339	0.170597	1	725	tags=31%, list=6%, signal=33%
GO_POSITIVE_REGULATION_OF_INTERLEUKIN_10_PRODUCTION	GO_POSITIVE_REGULATION_OF_INTERLEUKIN_10_PRODUCTION		23	-0.49073	-1.38554	0.0921348	0.171022	1	1646	tags=35%, list=14%, signal=40%
GO_REGULATION_OF_CALCIUM_ION_DEPENDENT_EXOCYTOSIS	GO_REGULATION_OF_CALCIUM_ION_DEPENDENT_EXOCYTOSIS		35	-0.450574	-1.38528	0.07173	0.171101	1	2137	tags=31%, list=18%, signal=38%
GO_NEGATIVE_REGULATION_OF_APOPTOTIC_SIGNALING_PATHWAY	GO_NEGATIVE_REGULATION_OF_APOPTOTIC_SIGNALING_PATHWAY		140	-0.351836	-1.38477	0.0190275	0.17148	1	1821	tags=23%, list=16%, signal=27%
GO_SMAD_BINDING	GO_SMAD_BINDING		48	-0.414752	-1.38381	0.0517598	0.172298	1	2614	tags=31%, list=23%, signal=40%
GO_EMBRYONIC_ORGAN_DEVELOPMENT	GO_EMBRYONIC_ORGAN_DEVELOPMENT		194	-0.333397	-1.38289	0.00877193	0.173114	1	2022	tags=20%, list=17%, signal=23%
GO_POSITIVE_REGULATION_OF_ORGANELLE_ASSEMBLY	GO_POSITIVE_REGULATION_OF_ORGANELLE_ASSEMBLY		39	-0.426497	-1.38239	0.0508475	0.173474	1	2666	tags=31%, list=23%, signal=40%
GO_CELLULAR_RESPONSE_TO_DEXAMETHASONE_STIMULUS	GO_CELLULAR_RESPONSE_TO_DEXAMETHASONE_STIMULUS		15	-0.52963	-1.38188	0.116034	0.173835	1	555	tags=27%, list=5%, signal=28%
GO_MACROPHAGE_ACTIVATION	GO_MACROPHAGE_ACTIVATION		16	-0.530799	-1.3817	0.094	0.173815	1	3170	tags=50%, list=27%, signal=69%
GO_EARLY_ENDOSOME	GO_EARLY_ENDOSOME		210	-0.329809	-1.38165	0.00220751	0.173655	1	1499	tags=20%, list=13%, signal=22%
GO_REGULATION_OF_FATTY_ACID_OXIDATION	GO_REGULATION_OF_FATTY_ACID_OXIDATION		17	-0.522966	-1.38134	0.0949367	0.173775	1	1033	tags=24%, list=9%, signal=26%
GO_ROUGH_ENDOPLASMIC_RETICULUM	GO_ROUGH_ENDOPLASMIC_RETICULUM		45	-0.420513	-1.3811	0.0627615	0.17383	1	2162	tags=31%, list=19%, signal=38%
GO_REGULATION_OF_DEVELOPMENTAL_GROWTH	GO_REGULATION_OF_DEVELOPMENTAL_GROWTH		153	-0.344419	-1.38056	0.00212766	0.174188	1	2386	tags=31%, list=21%, signal=38%
GO_POSITIVE_REGULATION_OF_GROWTH	GO_POSITIVE_REGULATION_OF_GROWTH		134	-0.354177	-1.38055	0.0125786	0.173972	1	2133	tags=29%, list=18%, signal=35%
GO_POSITIVE_REGULATION_OF_SUBSTRATE_ADHESION_DEPENDENT_CELL_SPREADING	GO_POSITIVE_REGULATION_OF_SUBSTRATE_ADHESION_DEPENDENT_CELL_SPREADING		19	-0.513949	-1.38031	0.102362	0.174022	1	1259	tags=26%, list=11%, signal=29%
GO_RESPONSE_TO_DEXAMETHASONE	GO_RESPONSE_TO_DEXAMETHASONE		21	-0.498994	-1.38013	0.0780911	0.174009	1	555	tags=24%, list=5%, signal=25%
GO_REGULATION_OF_PROTEIN_SERINE_THREONINE_KINASE_ACTIVITY	GO_REGULATION_OF_PROTEIN_SERINE_THREONINE_KINASE_ACTIVITY		333	-0.3086	-1.37943	0.0021645	0.174652	1	1642	tags=18%, list=14%, signal=20%
GO_NEGATIVE_REGULATION_OF_INTRACELLULAR_TRANSPORT	GO_NEGATIVE_REGULATION_OF_INTRACELLULAR_TRANSPORT		98	-0.362959	-1.37941	0.0424107	0.174445	1	1197	tags=19%, list=10%, signal=21%
GO_AGING	GO_AGING		163	-0.338593	-1.37879	0.0149893	0.174909	1	1099	tags=17%, list=9%, signal=19%
GO_REGULATION_OF_CATION_TRANSMEMBRANE_TRANSPORT	GO_REGULATION_OF_CATION_TRANSMEMBRANE_TRANSPORT		104	-0.35965	-1.37876	0.0175824	0.174714	1	2859	tags=35%, list=25%, signal=46%
GO_NEURON_PROJECTION_MORPHOGENESIS	GO_NEURON_PROJECTION_MORPHOGENESIS		182	-0.331558	-1.37786	0.016055	0.175503	1	2502	tags=29%, list=22%, signal=37%
GO_DETOXIFICATION	GO_DETOXIFICATION		45	-0.423318	-1.37749	0.0555556	0.175684	1	1111	tags=20%, list=10%, signal=22%
GO_INTRINSIC_APOPTOTIC_SIGNALING_PATHWAY	GO_INTRINSIC_APOPTOTIC_SIGNALING_PATHWAY		124	-0.353837	-1.37672	0.0210526	0.176293	1	1545	tags=23%, list=13%, signal=26%
GO_CELLULAR_RESPONSE_TO_EXTERNAL_STIMULUS	GO_CELLULAR_RESPONSE_TO_EXTERNAL_STIMULUS		185	-0.333581	-1.37653	0.0202703	0.176291	1	1307	tags=16%, list=11%, signal=18%
GO_REGULATION_OF_MYELOID_CELL_APOPTOTIC_PROCESS	GO_REGULATION_OF_MYELOID_CELL_APOPTOTIC_PROCESS		16	-0.526982	-1.37546	0.107368	0.177293	1	1566	tags=31%, list=14%, signal=36%
GO_CHAPERONE_BINDING	GO_CHAPERONE_BINDING		67	-0.388202	-1.37516	0.0245902	0.17741	1	1054	tags=21%, list=9%, signal=23%
GO_REGULATION_OF_CYSTEINE_TYPE_ENDOPEPTIDASE_ACTIVITY	GO_REGULATION_OF_CYSTEINE_TYPE_ENDOPEPTIDASE_ACTIVITY		161	-0.340745	-1.37405	0.0255319	0.178461	1	1808	tags=24%, list=16%, signal=28%
GO_POSITIVE_REGULATION_OF_TRANSMEMBRANE_RECEPTOR_PROTEIN_SERINE_THREONINE_KINASE_SIGNALING_PATHWAY	GO_POSITIVE_REGULATION_OF_TRANSMEMBRANE_RECEPTOR_PROTEIN_SERINE_THREONINE_KINASE_SIGNALING_PATHWAY		53	-0.403811	-1.37382	0.052521	0.178522	1	1639	tags=25%, list=14%, signal=28%
GO_CYCLIC_NUCLEOTIDE_METABOLIC_PROCESS	GO_CYCLIC_NUCLEOTIDE_METABOLIC_PROCESS		27	-0.468545	-1.37374	0.10352	0.178381	1	1586	tags=19%, list=14%, signal=21%
GO_RESPONSE_TO_TRANSFORMING_GROWTH_FACTOR_BETA	GO_RESPONSE_TO_TRANSFORMING_GROWTH_FACTOR_BETA		88	-0.376645	-1.37294	0.032538	0.179028	1	1754	tags=24%, list=15%, signal=28%
GO_REGULATION_OF_MUSCLE_CONTRACTION	GO_REGULATION_OF_MUSCLE_CONTRACTION		68	-0.384811	-1.37292	0.0419287	0.17882	1	1483	tags=25%, list=13%, signal=29%
GO_RESPONSE_TO_FATTY_ACID	GO_RESPONSE_TO_FATTY_ACID		54	-0.407006	-1.37252	0.0618337	0.179039	1	1985	tags=30%, list=17%, signal=36%
GO_REGULATION_OF_ACUTE_INFLAMMATORY_RESPONSE	GO_REGULATION_OF_ACUTE_INFLAMMATORY_RESPONSE		39	-0.435203	-1.3722	0.0622318	0.179173	1	1596	tags=26%, list=14%, signal=30%
GO_NEGATIVE_REGULATION_OF_PHOSPHORUS_METABOLIC_PROCESS	GO_NEGATIVE_REGULATION_OF_PHOSPHORUS_METABOLIC_PROCESS		328	-0.311881	-1.37149	0.00429185	0.17981	1	1349	tags=16%, list=12%, signal=18%
GO_REGULATION_OF_NEURON_DIFFERENTIATION	GO_REGULATION_OF_NEURON_DIFFERENTIATION		288	-0.316121	-1.37143	0.00221729	0.179667	1	2405	tags=26%, list=21%, signal=32%
GO_KINASE_REGULATOR_ACTIVITY	GO_KINASE_REGULATOR_ACTIVITY		124	-0.34973	-1.37093	0.038961	0.179999	1	1033	tags=14%, list=9%, signal=15%
GO_B_CELL_DIFFERENTIATION	GO_B_CELL_DIFFERENTIATION		54	-0.405346	-1.37085	0.0572597	0.179838	1	1566	tags=30%, list=14%, signal=34%
GO_CALCIUM_ION_REGULATED_EXOCYTOSIS	GO_CALCIUM_ION_REGULATED_EXOCYTOSIS		39	-0.433323	-1.37081	0.0701754	0.179651	1	3496	tags=36%, list=30%, signal=51%
GO_ENZYME_LINKED_RECEPTOR_PROTEIN_SIGNALING_PATHWAY	GO_ENZYME_LINKED_RECEPTOR_PROTEIN_SIGNALING_PATHWAY		413	-0.303986	-1.37054	0	0.179743	1	2519	tags=29%, list=22%, signal=36%
GO_REGULATION_OF_STRESS_ACTIVATED_PROTEIN_KINASE_SIGNALING_CASCADE	GO_REGULATION_OF_STRESS_ACTIVATED_PROTEIN_KINASE_SIGNALING_CASCADE		140	-0.345648	-1.37037	0.0175824	0.179725	1	1822	tags=24%, list=16%, signal=28%
GO_REGULATION_OF_LEUKOCYTE_APOPTOTIC_PROCESS	GO_REGULATION_OF_LEUKOCYTE_APOPTOTIC_PROCESS		60	-0.396089	-1.36953	0.0513919	0.18046	1	2160	tags=42%, list=19%, signal=51%
GO_EMBRYONIC_MORPHOGENESIS	GO_EMBRYONIC_MORPHOGENESIS		250	-0.321069	-1.36915	0.00431035	0.180668	1	1718	tags=19%, list=15%, signal=22%
GO_ENDOCYTIC_VESICLE	GO_ENDOCYTIC_VESICLE		165	-0.335617	-1.36899	0.0206422	0.180613	1	1918	tags=25%, list=17%, signal=30%
GO_REGULATION_OF_EXTRINSIC_APOPTOTIC_SIGNALING_PATHWAY_IN_ABSENCE_OF_LIGAND	GO_REGULATION_OF_EXTRINSIC_APOPTOTIC_SIGNALING_PATHWAY_IN_ABSENCE_OF_LIGAND		28	-0.467432	-1.36892	0.0987654	0.18049	1	1765	tags=32%, list=15%, signal=38%
GO_REGULATION_OF_VIRAL_GENOME_REPLICATION	GO_REGULATION_OF_VIRAL_GENOME_REPLICATION		63	-0.394021	-1.36862	0.0518359	0.180597	1	1845	tags=30%, list=16%, signal=36%
GO_CELLULAR_RESPONSE_TO_HORMONE_STIMULUS	GO_CELLULAR_RESPONSE_TO_HORMONE_STIMULUS		334	-0.312284	-1.36859	0.00659341	0.180398	1	2370	tags=27%, list=20%, signal=33%
GO_REGULATION_OF_CELL_PROJECTION_ORGANIZATION	GO_REGULATION_OF_CELL_PROJECTION_ORGANIZATION		309	-0.314289	-1.36834	0.00680272	0.180434	1	2134	tags=24%, list=18%, signal=29%
GO_LEUKOCYTE_HOMEOSTASIS	GO_LEUKOCYTE_HOMEOSTASIS		46	-0.41091	-1.3682	0.0532151	0.180371	1	1002	tags=15%, list=9%, signal=17%
GO_RESPONSE_TO_TOXIC_SUBSTANCE	GO_RESPONSE_TO_TOXIC_SUBSTANCE		153	-0.341078	-1.36781	0.015625	0.180632	1	1542	tags=22%, list=13%, signal=25%
GO_REGULATION_OF_NEUROTRANSMITTER_TRANSPORT	GO_REGULATION_OF_NEUROTRANSMITTER_TRANSPORT		31	-0.452778	-1.36767	0.0852391	0.18058	1	1439	tags=23%, list=12%, signal=26%
GO_REGULATION_OF_HOMEOSTATIC_PROCESS	GO_REGULATION_OF_HOMEOSTATIC_PROCESS		279	-0.315877	-1.36759	0.00873363	0.180429	1	2297	tags=27%, list=20%, signal=33%
GO_POSITIVE_REGULATION_OF_DEVELOPMENTAL_GROWTH	GO_POSITIVE_REGULATION_OF_DEVELOPMENTAL_GROWTH		81	-0.371327	-1.36703	0.0440529	0.180868	1	2291	tags=33%, list=20%, signal=41%
GO_POSITIVE_REGULATION_OF_TISSUE_REMODELING	GO_POSITIVE_REGULATION_OF_TISSUE_REMODELING		17	-0.51959	-1.36582	0.105932	0.1821	1	1547	tags=47%, list=13%, signal=54%
GO_THIOESTER_METABOLIC_PROCESS	GO_THIOESTER_METABOLIC_PROCESS		57	-0.401565	-1.36544	0.058427	0.182352	1	1440	tags=25%, list=12%, signal=28%
GO_ENDOPLASMIC_RETICULUM_GOLGI_INTERMEDIATE_COMPARTMENT_MEMBRANE	GO_ENDOPLASMIC_RETICULUM_GOLGI_INTERMEDIATE_COMPARTMENT_MEMBRANE		46	-0.408671	-1.36358	0.0724947	0.184283	1	1978	tags=28%, list=17%, signal=34%
GO_PROTEINACEOUS_EXTRACELLULAR_MATRIX	GO_PROTEINACEOUS_EXTRACELLULAR_MATRIX		97	-0.365743	-1.36304	0.0472103	0.184684	1	1751	tags=23%, list=15%, signal=26%
GO_LYTIC_VACUOLE	GO_LYTIC_VACUOLE		367	-0.306779	-1.36234	0.0043956	0.185284	1	1792	tags=23%, list=15%, signal=27%
GO_TRIVALENT_INORGANIC_CATION_TRANSPORT	GO_TRIVALENT_INORGANIC_CATION_TRANSPORT		28	-0.462332	-1.3623	0.0661479	0.185116	1	574	tags=18%, list=5%, signal=19%
GO_REGULATION_OF_PROTEIN_IMPORT	GO_REGULATION_OF_PROTEIN_IMPORT		129	-0.347635	-1.36204	0.0362473	0.185137	1	1639	tags=23%, list=14%, signal=27%
GO_RESPONSE_TO_AMPHETAMINE	GO_RESPONSE_TO_AMPHETAMINE		18	-0.503717	-1.36181	0.114228	0.185166	1	58	tags=11%, list=1%, signal=11%
GO_PROTEIN_LOCALIZATION_TO_CELL_PERIPHERY	GO_PROTEIN_LOCALIZATION_TO_CELL_PERIPHERY		102	-0.360605	-1.36173	0.045929	0.185046	1	2299	tags=26%, list=20%, signal=33%
GO_SECRETORY_VESICLE	GO_SECRETORY_VESICLE		209	-0.323012	-1.36109	0.0125261	0.185544	1	1194	tags=18%, list=10%, signal=19%
GO_FC_RECEPTOR_SIGNALING_PATHWAY	GO_FC_RECEPTOR_SIGNALING_PATHWAY		163	-0.330139	-1.36087	0.0242826	0.185587	1	2268	tags=26%, list=20%, signal=32%
GO_REGULATION_OF_NEURON_PROJECTION_DEVELOPMENT	GO_REGULATION_OF_NEURON_PROJECTION_DEVELOPMENT		210	-0.323	-1.36083	0.00663717	0.185401	1	2405	tags=27%, list=21%, signal=33%
GO_STEROL_TRANSPORT	GO_STEROL_TRANSPORT		26	-0.471413	-1.3597	0.0968421	0.186444	1	1256	tags=23%, list=11%, signal=26%
GO_REGULATION_OF_ENDOPLASMIC_RETICULUM_UNFOLDED_PROTEIN_RESPONSE	GO_REGULATION_OF_ENDOPLASMIC_RETICULUM_UNFOLDED_PROTEIN_RESPONSE		24	-0.480477	-1.35959	0.108108	0.186353	1	1021	tags=25%, list=9%, signal=27%
GO_POSITIVE_REGULATION_OF_CELL_SUBSTRATE_ADHESION	GO_POSITIVE_REGULATION_OF_CELL_SUBSTRATE_ADHESION		54	-0.398012	-1.35935	0.0714286	0.186395	1	2336	tags=33%, list=20%, signal=42%
GO_POLYOL_BIOSYNTHETIC_PROCESS	GO_POLYOL_BIOSYNTHETIC_PROCESS		21	-0.482927	-1.35782	0.114583	0.188033	1	446	tags=19%, list=4%, signal=20%
GO_REGULATION_OF_LIPID_CATABOLIC_PROCESS	GO_REGULATION_OF_LIPID_CATABOLIC_PROCESS		29	-0.459196	-1.35765	0.0835214	0.187975	1	1095	tags=24%, list=9%, signal=27%
GO_SINGLE_ORGANISM_MEMBRANE_FUSION	GO_SINGLE_ORGANISM_MEMBRANE_FUSION		78	-0.374442	-1.3576	0.045738	0.187802	1	1875	tags=23%, list=16%, signal=27%
GO_GOLGI_ASSOCIATED_VESICLE	GO_GOLGI_ASSOCIATED_VESICLE		62	-0.394508	-1.35685	0.0461216	0.188424	1	1780	tags=29%, list=15%, signal=34%
GO_REGULATION_OF_PHAGOCYTOSIS	GO_REGULATION_OF_PHAGOCYTOSIS		40	-0.430941	-1.35618	0.0886076	0.188964	1	721	tags=18%, list=6%, signal=19%
GO_KIDNEY_EPITHELIUM_DEVELOPMENT	GO_KIDNEY_EPITHELIUM_DEVELOPMENT		53	-0.402442	-1.35572	0.0731707	0.189281	1	1539	tags=25%, list=13%, signal=28%
GO_HSP70_PROTEIN_BINDING	GO_HSP70_PROTEIN_BINDING		25	-0.474446	-1.35514	0.0993915	0.189761	1	1977	tags=32%, list=17%, signal=39%
GO_CARBOHYDRATE_DERIVATIVE_BIOSYNTHETIC_PROCESS	GO_CARBOHYDRATE_DERIVATIVE_BIOSYNTHETIC_PROCESS		385	-0.303923	-1.35495	0.00408163	0.189741	1	1568	tags=21%, list=14%, signal=23%
GO_REGULATION_OF_REGULATED_SECRETORY_PATHWAY	GO_REGULATION_OF_REGULATED_SECRETORY_PATHWAY		68	-0.384723	-1.35406	0.0523256	0.190551	1	1547	tags=24%, list=13%, signal=27%
GO_LIPASE_ACTIVITY	GO_LIPASE_ACTIVITY		56	-0.38991	-1.35385	0.08	0.190563	1	2259	tags=30%, list=20%, signal=38%
GO_BLOOD_MICROPARTICLE	GO_BLOOD_MICROPARTICLE		40	-0.423798	-1.35317	0.0868644	0.191108	1	574	tags=18%, list=5%, signal=18%
GO_CALCIUM_CHANNEL_REGULATOR_ACTIVITY	GO_CALCIUM_CHANNEL_REGULATOR_ACTIVITY		18	-0.503158	-1.3531	0.104121	0.190942	1	1090	tags=28%, list=9%, signal=31%
GO_LONG_CHAIN_FATTY_ACID_METABOLIC_PROCESS	GO_LONG_CHAIN_FATTY_ACID_METABOLIC_PROCESS		50	-0.408264	-1.35193	0.0721649	0.192232	1	1183	tags=22%, list=10%, signal=24%
GO_COPI_COATED_VESICLE_MEMBRANE	GO_COPI_COATED_VESICLE_MEMBRANE		15	-0.537887	-1.35167	0.11691	0.192284	1	1780	tags=33%, list=15%, signal=39%
GO_LIPID_BIOSYNTHETIC_PROCESS	GO_LIPID_BIOSYNTHETIC_PROCESS		347	-0.305805	-1.35146	0.00705882	0.192307	1	2136	tags=23%, list=18%, signal=28%
GO_CELL_CELL_CONTACT_ZONE	GO_CELL_CELL_CONTACT_ZONE		35	-0.42496	-1.35136	0.0714286	0.1922	1	2059	tags=34%, list=18%, signal=42%
GO_NEGATIVE_REGULATION_OF_CELL_DEVELOPMENT	GO_NEGATIVE_REGULATION_OF_CELL_DEVELOPMENT		154	-0.333399	-1.35135	0.0416667	0.191982	1	1629	tags=22%, list=14%, signal=25%
GO_MUSCLE_TISSUE_DEVELOPMENT	GO_MUSCLE_TISSUE_DEVELOPMENT		135	-0.346211	-1.35091	0.0389016	0.192269	1	1753	tags=24%, list=15%, signal=28%
GO_RESPONSE_TO_INORGANIC_SUBSTANCE	GO_RESPONSE_TO_INORGANIC_SUBSTANCE		296	-0.310431	-1.35076	0.00936768	0.192223	1	1002	tags=16%, list=9%, signal=17%
GO_NEGATIVE_REGULATION_OF_ENDOTHELIAL_CELL_APOPTOTIC_PROCESS	GO_NEGATIVE_REGULATION_OF_ENDOTHELIAL_CELL_APOPTOTIC_PROCESS		15	-0.524706	-1.35051	0.133333	0.192264	1	760	tags=27%, list=7%, signal=29%
GO_LEUKOCYTE_DEGRANULATION	GO_LEUKOCYTE_DEGRANULATION		24	-0.472177	-1.34987	0.118393	0.19283	1	1792	tags=25%, list=15%, signal=30%
GO_PHOSPHATIDYLINOSITOL_3_KINASE_ACTIVITY	GO_PHOSPHATIDYLINOSITOL_3_KINASE_ACTIVITY		40	-0.426931	-1.34949	0.0837004	0.193108	1	2331	tags=28%, list=20%, signal=34%
GO_REGULATION_OF_ACTIN_FILAMENT_BASED_PROCESS	GO_REGULATION_OF_ACTIN_FILAMENT_BASED_PROCESS		190	-0.319823	-1.34925	0.0101626	0.193199	1	2225	tags=24%, list=19%, signal=29%
GO_POLYSACCHARIDE_CATABOLIC_PROCESS	GO_POLYSACCHARIDE_CATABOLIC_PROCESS		16	-0.510259	-1.34902	0.1258	0.193246	1	2292	tags=50%, list=20%, signal=62%
GO_REGULATION_OF_MYOBLAST_DIFFERENTIATION	GO_REGULATION_OF_MYOBLAST_DIFFERENTIATION		27	-0.462708	-1.34891	0.0982906	0.19313	1	1865	tags=33%, list=16%, signal=40%
GO_CHONDROITIN_SULFATE_PROTEOGLYCAN_BIOSYNTHETIC_PROCESS	GO_CHONDROITIN_SULFATE_PROTEOGLYCAN_BIOSYNTHETIC_PROCESS		15	-0.529217	-1.34819	0.125828	0.19369	1	1604	tags=27%, list=14%, signal=31%
GO_PHOSPHOLIPID_TRANSPORT	GO_PHOSPHOLIPID_TRANSPORT		32	-0.442088	-1.34764	0.0871369	0.194112	1	1172	tags=28%, list=10%, signal=31%
GO_TUBE_MORPHOGENESIS	GO_TUBE_MORPHOGENESIS		177	-0.330516	-1.34721	0.0275424	0.194444	1	1780	tags=21%, list=15%, signal=24%
GO_NEGATIVE_REGULATION_OF_TRANSPORTER_ACTIVITY	GO_NEGATIVE_REGULATION_OF_TRANSPORTER_ACTIVITY		32	-0.438664	-1.34694	0.0888889	0.194518	1	1700	tags=22%, list=15%, signal=26%
GO_UROGENITAL_SYSTEM_DEVELOPMENT	GO_UROGENITAL_SYSTEM_DEVELOPMENT		136	-0.338228	-1.34668	0.0282609	0.194618	1	1880	tags=21%, list=16%, signal=25%
GO_EYE_MORPHOGENESIS	GO_EYE_MORPHOGENESIS		56	-0.39447	-1.34634	0.0699153	0.194808	1	1601	tags=23%, list=14%, signal=27%
GO_OXIDOREDUCTASE_ACTIVITY_ACTING_ON_THE_CH_CH_GROUP_OF_DONORS	GO_OXIDOREDUCTASE_ACTIVITY_ACTING_ON_THE_CH_CH_GROUP_OF_DONORS		44	-0.410632	-1.34537	0.0764463	0.195747	1	1341	tags=25%, list=12%, signal=28%
GO_POSITIVE_REGULATION_OF_TRANSPORTER_ACTIVITY	GO_POSITIVE_REGULATION_OF_TRANSPORTER_ACTIVITY		37	-0.432225	-1.34476	0.0993378	0.196263	1	1862	tags=32%, list=16%, signal=39%
GO_CELL_ACTIVATION_INVOLVED_IN_IMMUNE_RESPONSE	GO_CELL_ACTIVATION_INVOLVED_IN_IMMUNE_RESPONSE		96	-0.362065	-1.34265	0.0587084	0.198502	1	1016	tags=18%, list=9%, signal=19%
GO_REGULATION_OF_INTRACELLULAR_PROTEIN_TRANSPORT	GO_REGULATION_OF_INTRACELLULAR_PROTEIN_TRANSPORT		264	-0.313671	-1.342	0.0110375	0.199078	1	1546	tags=20%, list=13%, signal=23%
GO_TRANSMEMBRANE_RECEPTOR_PROTEIN_SERINE_THREONINE_KINASE_SIGNALING_PATHWAY	GO_TRANSMEMBRANE_RECEPTOR_PROTEIN_SERINE_THREONINE_KINASE_SIGNALING_PATHWAY		102	-0.357239	-1.34199	0.0407725	0.198852	1	485	tags=11%, list=4%, signal=11%
GO_POSITIVE_REGULATION_OF_PHAGOCYTOSIS	GO_POSITIVE_REGULATION_OF_PHAGOCYTOSIS		26	-0.457921	-1.34157	0.106157	0.199161	1	721	tags=19%, list=6%, signal=20%
GO_REGULATION_OF_TRIGLYCERIDE_METABOLIC_PROCESS	GO_REGULATION_OF_TRIGLYCERIDE_METABOLIC_PROCESS		18	-0.488793	-1.34093	0.118712	0.199703	1	840	tags=22%, list=7%, signal=24%
GO_AMMONIUM_TRANSPORT	GO_AMMONIUM_TRANSPORT		26	-0.463434	-1.34064	0.0942623	0.199827	1	2223	tags=38%, list=19%, signal=47%
GO_REGULATION_OF_NUCLEOCYTOPLASMIC_TRANSPORT	GO_REGULATION_OF_NUCLEOCYTOPLASMIC_TRANSPORT		160	-0.330025	-1.34025	0.0261438	0.200082	1	1741	tags=22%, list=15%, signal=25%
GO_POSITIVE_REGULATION_OF_ION_TRANSPORT	GO_POSITIVE_REGULATION_OF_ION_TRANSPORT		113	-0.348166	-1.34014	0.0516529	0.200017	1	1865	tags=24%, list=16%, signal=28%
GO_REGULATION_OF_TYPE_2_IMMUNE_RESPONSE	GO_REGULATION_OF_TYPE_2_IMMUNE_RESPONSE		19	-0.502621	-1.34001	0.124473	0.199924	1	832	tags=32%, list=7%, signal=34%
GO_NEGATIVE_REGULATION_OF_NEURON_DEATH	GO_NEGATIVE_REGULATION_OF_NEURON_DEATH		97	-0.357685	-1.33937	0.0461847	0.200456	1	1053	tags=19%, list=9%, signal=20%
GO_THYMOCYTE_AGGREGATION	GO_THYMOCYTE_AGGREGATION		31	-0.442471	-1.33889	0.0949227	0.200803	1	2045	tags=35%, list=18%, signal=43%
GO_NEGATIVE_REGULATION_OF_INTERLEUKIN_6_PRODUCTION	GO_NEGATIVE_REGULATION_OF_INTERLEUKIN_6_PRODUCTION		23	-0.480156	-1.33853	0.0955285	0.201011	1	760	tags=22%, list=7%, signal=23%
GO_PLATELET_ALPHA_GRANULE	GO_PLATELET_ALPHA_GRANULE		33	-0.437334	-1.33824	0.0977597	0.201134	1	2125	tags=33%, list=18%, signal=41%
GO_NEGATIVE_REGULATION_OF_INTRACELLULAR_SIGNAL_TRANSDUCTION	GO_NEGATIVE_REGULATION_OF_INTRACELLULAR_SIGNAL_TRANSDUCTION		294	-0.30627	-1.33776	0.0106838	0.201479	1	1645	tags=19%, list=14%, signal=22%
GO_REGULATION_OF_INTRACELLULAR_TRANSPORT	GO_REGULATION_OF_INTRACELLULAR_TRANSPORT		427	-0.29734	-1.33755	0.00223714	0.20153	1	1546	tags=19%, list=13%, signal=21%
GO_BLOOD_VESSEL_MORPHOGENESIS	GO_BLOOD_VESSEL_MORPHOGENESIS		194	-0.325177	-1.33733	0.0104384	0.201631	1	1612	tags=22%, list=14%, signal=25%
GO_AMIDE_BINDING	GO_AMIDE_BINDING		154	-0.333751	-1.33636	0.0200893	0.202616	1	848	tags=16%, list=7%, signal=17%
GO_REGULATION_OF_CELL_MORPHOGENESIS	GO_REGULATION_OF_CELL_MORPHOGENESIS		327	-0.303439	-1.33615	0.0103093	0.202636	1	2388	tags=25%, list=21%, signal=31%
GO_CELLULAR_COMPONENT_DISASSEMBLY_INVOLVED_IN_EXECUTION_PHASE_OF_APOPTOSIS	GO_CELLULAR_COMPONENT_DISASSEMBLY_INVOLVED_IN_EXECUTION_PHASE_OF_APOPTOSIS		30	-0.441832	-1.33578	0.118026	0.202866	1	1740	tags=30%, list=15%, signal=35%
GO_IONOTROPIC_GLUTAMATE_RECEPTOR_BINDING	GO_IONOTROPIC_GLUTAMATE_RECEPTOR_BINDING		15	-0.508989	-1.3357	0.128421	0.202734	1	254	tags=13%, list=2%, signal=14%
GO_DECIDUALIZATION	GO_DECIDUALIZATION		15	-0.531601	-1.33504	0.142558	0.203345	1	1458	tags=40%, list=13%, signal=46%
GO_CIRCULATORY_SYSTEM_DEVELOPMENT	GO_CIRCULATORY_SYSTEM_DEVELOPMENT		423	-0.298911	-1.33412	0.00449438	0.204258	1	1547	tags=17%, list=13%, signal=19%
GO_REGULATION_OF_ORGAN_MORPHOGENESIS	GO_REGULATION_OF_ORGAN_MORPHOGENESIS		142	-0.33128	-1.33376	0.0351648	0.204476	1	1754	tags=20%, list=15%, signal=23%
GO_REGULATION_OF_SUBSTRATE_ADHESION_DEPENDENT_CELL_SPREADING	GO_REGULATION_OF_SUBSTRATE_ADHESION_DEPENDENT_CELL_SPREADING		31	-0.437897	-1.33183	0.113684	0.206617	1	2258	tags=32%, list=20%, signal=40%
GO_MAINTENANCE_OF_LOCATION	GO_MAINTENANCE_OF_LOCATION		96	-0.352646	-1.33135	0.0512821	0.206985	1	2292	tags=29%, list=20%, signal=36%
GO_REGULATION_OF_DNA_TEMPLATED_TRANSCRIPTION_IN_RESPONSE_TO_STRESS	GO_REGULATION_OF_DNA_TEMPLATED_TRANSCRIPTION_IN_RESPONSE_TO_STRESS		55	-0.388038	-1.33107	0.0783133	0.207111	1	1038	tags=16%, list=9%, signal=18%
GO_RETINA_MORPHOGENESIS_IN_CAMERA_TYPE_EYE	GO_RETINA_MORPHOGENESIS_IN_CAMERA_TYPE_EYE		16	-0.512543	-1.3296	0.142857	0.208731	1	2230	tags=31%, list=19%, signal=39%
GO_REGULATION_OF_INSULIN_RECEPTOR_SIGNALING_PATHWAY	GO_REGULATION_OF_INSULIN_RECEPTOR_SIGNALING_PATHWAY		28	-0.455259	-1.32925	0.107004	0.208955	1	2325	tags=43%, list=20%, signal=53%
GO_NEGATIVE_REGULATION_OF_TRANSFERASE_ACTIVITY	GO_NEGATIVE_REGULATION_OF_TRANSFERASE_ACTIVITY		249	-0.311693	-1.32878	0.0151515	0.209341	1	1349	tags=17%, list=12%, signal=19%
GO_HEAT_SHOCK_PROTEIN_BINDING	GO_HEAT_SHOCK_PROTEIN_BINDING		72	-0.371727	-1.32819	0.0748899	0.209859	1	1023	tags=17%, list=9%, signal=18%
GO_RESPONSE_TO_HYDROGEN_PEROXIDE	GO_RESPONSE_TO_HYDROGEN_PEROXIDE		82	-0.363864	-1.32722	0.0625	0.210842	1	1542	tags=27%, list=13%, signal=31%
GO_RAS_GUANYL_NUCLEOTIDE_EXCHANGE_FACTOR_ACTIVITY	GO_RAS_GUANYL_NUCLEOTIDE_EXCHANGE_FACTOR_ACTIVITY		118	-0.336331	-1.32556	0.0362473	0.212652	1	2015	tags=24%, list=17%, signal=28%
GO_TRANSMEMBRANE_RECEPTOR_PROTEIN_TYROSINE_KINASE_SIGNALING_PATHWAY	GO_TRANSMEMBRANE_RECEPTOR_PROTEIN_TYROSINE_KINASE_SIGNALING_PATHWAY		317	-0.30213	-1.32329	0.0105263	0.21543	1	2497	tags=30%, list=22%, signal=38%
GO_REGULATION_OF_MYELINATION	GO_REGULATION_OF_MYELINATION		21	-0.476823	-1.32292	0.115385	0.215732	1	1082	tags=19%, list=9%, signal=21%
GO_PHOTORECEPTOR_CELL_DIFFERENTIATION	GO_PHOTORECEPTOR_CELL_DIFFERENTIATION		21	-0.474577	-1.32268	0.139831	0.215793	1	2230	tags=38%, list=19%, signal=47%
GO_POSITIVE_REGULATION_OF_CATION_CHANNEL_ACTIVITY	GO_POSITIVE_REGULATION_OF_CATION_CHANNEL_ACTIVITY		19	-0.499862	-1.32235	0.118393	0.21599	1	1847	tags=37%, list=16%, signal=44%
GO_LEARNING	GO_LEARNING		65	-0.380772	-1.32229	0.0587002	0.215855	1	1172	tags=20%, list=10%, signal=22%
GO_ANGIOGENESIS	GO_ANGIOGENESIS		154	-0.328969	-1.32194	0.0272537	0.216114	1	1935	tags=26%, list=17%, signal=31%
GO_EPIDERMAL_GROWTH_FACTOR_RECEPTOR_BINDING	GO_EPIDERMAL_GROWTH_FACTOR_RECEPTOR_BINDING		18	-0.495715	-1.32165	0.139394	0.216241	1	2290	tags=39%, list=20%, signal=48%
GO_RESPONSE_TO_RETINOIC_ACID	GO_RESPONSE_TO_RETINOIC_ACID		51	-0.392006	-1.32125	0.0778689	0.216526	1	2004	tags=29%, list=17%, signal=35%
GO_SKELETAL_SYSTEM_DEVELOPMENT	GO_SKELETAL_SYSTEM_DEVELOPMENT		219	-0.315058	-1.32062	0.0144033	0.217098	1	2462	tags=28%, list=21%, signal=35%
GO_CALCIUM_ION_BINDING	GO_CALCIUM_ION_BINDING		258	-0.308764	-1.32062	0.012931	0.216859	1	2477	tags=31%, list=21%, signal=39%
GO_PROTEIN_MATURATION	GO_PROTEIN_MATURATION		172	-0.319724	-1.32062	0.03125	0.216621	1	1414	tags=17%, list=12%, signal=19%
GO_DEFENSE_RESPONSE_TO_GRAM_POSITIVE_BACTERIUM	GO_DEFENSE_RESPONSE_TO_GRAM_POSITIVE_BACTERIUM		40	-0.405652	-1.32059	0.109053	0.21643	1	884	tags=30%, list=8%, signal=32%
GO_REGULATION_OF_MUSCLE_SYSTEM_PROCESS	GO_REGULATION_OF_MUSCLE_SYSTEM_PROCESS		100	-0.349035	-1.32026	0.0407725	0.216633	1	1819	tags=27%, list=16%, signal=32%
GO_ERYTHROCYTE_DEVELOPMENT	GO_ERYTHROCYTE_DEVELOPMENT		15	-0.533273	-1.31956	0.137045	0.217277	1	1452	tags=33%, list=13%, signal=38%
GO_REGULATION_OF_PLASMA_LIPOPROTEIN_PARTICLE_LEVELS	GO_REGULATION_OF_PLASMA_LIPOPROTEIN_PARTICLE_LEVELS		26	-0.45169	-1.31946	0.142558	0.217164	1	895	tags=19%, list=8%, signal=21%
GO_GROWTH_FACTOR_BINDING	GO_GROWTH_FACTOR_BINDING		53	-0.384414	-1.31944	0.0783898	0.216946	1	2015	tags=30%, list=17%, signal=36%
GO_GUANYL_NUCLEOTIDE_BINDING	GO_GUANYL_NUCLEOTIDE_BINDING		263	-0.306137	-1.31916	0.0180995	0.217079	1	2056	tags=26%, list=18%, signal=31%
GO_NEGATIVE_REGULATION_OF_ANION_TRANSPORT	GO_NEGATIVE_REGULATION_OF_ANION_TRANSPORT		16	-0.506938	-1.31855	0.148387	0.21765	1	2083	tags=38%, list=18%, signal=46%
GO_REGULATION_OF_MONOOXYGENASE_ACTIVITY	GO_REGULATION_OF_MONOOXYGENASE_ACTIVITY		42	-0.401557	-1.31826	0.0987654	0.217754	1	983	tags=17%, list=8%, signal=18%
GO_REGULATION_OF_CELL_MORPHOGENESIS_INVOLVED_IN_DIFFERENTIATION	GO_REGULATION_OF_CELL_MORPHOGENESIS_INVOLVED_IN_DIFFERENTIATION		182	-0.32043	-1.31816	0.0257511	0.217657	1	2388	tags=25%, list=21%, signal=31%
GO_DENDRITIC_CELL_DIFFERENTIATION	GO_DENDRITIC_CELL_DIFFERENTIATION		20	-0.47976	-1.31804	0.144898	0.217558	1	1017	tags=25%, list=9%, signal=27%
GO_REGULATION_OF_FATTY_ACID_METABOLIC_PROCESS	GO_REGULATION_OF_FATTY_ACID_METABOLIC_PROCESS		51	-0.394871	-1.31788	0.0935551	0.217525	1	1440	tags=25%, list=12%, signal=29%
GO_CATION_TRANSPORTING_ATPASE_ACTIVITY	GO_CATION_TRANSPORTING_ATPASE_ACTIVITY		41	-0.412976	-1.3169	0.0909091	0.218525	1	2596	tags=44%, list=22%, signal=56%
GO_CLATHRIN_COATED_ENDOCYTIC_VESICLE	GO_CLATHRIN_COATED_ENDOCYTIC_VESICLE		37	-0.425546	-1.31672	0.120582	0.218538	1	883	tags=19%, list=8%, signal=20%
GO_ATPASE_COUPLED_ION_TRANSMEMBRANE_TRANSPORTER_ACTIVITY	GO_ATPASE_COUPLED_ION_TRANSMEMBRANE_TRANSPORTER_ACTIVITY		46	-0.397156	-1.31612	0.097561	0.219093	1	2444	tags=39%, list=21%, signal=49%
GO_POSITIVE_REGULATION_OF_TYPE_I_INTERFERON_PRODUCTION	GO_POSITIVE_REGULATION_OF_TYPE_I_INTERFERON_PRODUCTION		64	-0.372993	-1.31582	0.073922	0.219246	1	734	tags=14%, list=6%, signal=15%
GO_TRANS_GOLGI_NETWORK	GO_TRANS_GOLGI_NETWORK		147	-0.328763	-1.31463	0.0300429	0.220525	1	1260	tags=16%, list=11%, signal=18%
GO_POSITIVE_REGULATION_OF_GLUCOSE_TRANSPORT	GO_POSITIVE_REGULATION_OF_GLUCOSE_TRANSPORT		22	-0.462815	-1.31459	0.105618	0.220342	1	2331	tags=36%, list=20%, signal=45%
GO_NEGATIVE_REGULATION_OF_CELLULAR_PROTEIN_LOCALIZATION	GO_NEGATIVE_REGULATION_OF_CELLULAR_PROTEIN_LOCALIZATION		98	-0.347173	-1.31389	0.0608519	0.221048	1	1188	tags=16%, list=10%, signal=18%
GO_OSSIFICATION	GO_OSSIFICATION		134	-0.335221	-1.31387	0.0378619	0.220846	1	2326	tags=30%, list=20%, signal=37%
GO_RESPONSE_TO_ACTIVITY	GO_RESPONSE_TO_ACTIVITY		34	-0.418906	-1.31335	0.106291	0.221258	1	2133	tags=35%, list=18%, signal=43%
GO_NEURAL_RETINA_DEVELOPMENT	GO_NEURAL_RETINA_DEVELOPMENT		21	-0.470055	-1.31327	0.147773	0.221142	1	2230	tags=33%, list=19%, signal=41%
GO_POSITIVE_REGULATION_OF_INTERLEUKIN_2_PRODUCTION	GO_POSITIVE_REGULATION_OF_INTERLEUKIN_2_PRODUCTION		24	-0.455231	-1.31322	0.12848	0.220958	1	1275	tags=25%, list=11%, signal=28%
GO_NEGATIVE_REGULATION_OF_LEUKOCYTE_APOPTOTIC_PROCESS	GO_NEGATIVE_REGULATION_OF_LEUKOCYTE_APOPTOTIC_PROCESS		30	-0.440474	-1.31315	0.109474	0.220804	1	2160	tags=50%, list=19%, signal=61%
GO_RESPONSE_TO_KETONE	GO_RESPONSE_TO_KETONE		112	-0.342814	-1.31296	0.0494624	0.220789	1	741	tags=16%, list=6%, signal=17%
GO_TRANSCRIPTIONAL_ACTIVATOR_ACTIVITY_RNA_POLYMERASE_II_DISTAL_ENHANCER_SEQUENCE_SPECIFIC_BINDING	GO_TRANSCRIPTIONAL_ACTIVATOR_ACTIVITY_RNA_POLYMERASE_II_DISTAL_ENHANCER_SEQUENCE_SPECIFIC_BINDING		18	-0.492675	-1.3126	0.162376	0.220999	1	1294	tags=17%, list=11%, signal=19%
GO_EPITHELIAL_TUBE_BRANCHING_INVOLVED_IN_LUNG_MORPHOGENESIS	GO_EPITHELIAL_TUBE_BRANCHING_INVOLVED_IN_LUNG_MORPHOGENESIS		15	-0.503425	-1.31224	0.141491	0.221249	1	1539	tags=33%, list=13%, signal=38%
GO_REGULATION_OF_EPIDERMAL_CELL_DIFFERENTIATION	GO_REGULATION_OF_EPIDERMAL_CELL_DIFFERENTIATION		24	-0.452202	-1.31004	0.126386	0.223901	1	2513	tags=42%, list=22%, signal=53%
GO_TISSUE_REMODELING	GO_TISSUE_REMODELING		45	-0.3918	-1.30939	0.0862069	0.2245	1	1472	tags=29%, list=13%, signal=33%
GO_REGULATION_OF_ENDOTHELIAL_CELL_APOPTOTIC_PROCESS	GO_REGULATION_OF_ENDOTHELIAL_CELL_APOPTOTIC_PROCESS		22	-0.457272	-1.3086	0.135524	0.225359	1	2075	tags=36%, list=18%, signal=44%
GO_KINASE_BINDING	GO_KINASE_BINDING		447	-0.285753	-1.30732	0.00845666	0.226862	1	1188	tags=15%, list=10%, signal=16%
GO_BASAL_PLASMA_MEMBRANE	GO_BASAL_PLASMA_MEMBRANE		16	-0.502135	-1.30665	0.151697	0.227534	1	2273	tags=38%, list=20%, signal=47%
GO_INTRAMOLECULAR_OXIDOREDUCTASE_ACTIVITY_TRANSPOSING_S_S_BONDS	GO_INTRAMOLECULAR_OXIDOREDUCTASE_ACTIVITY_TRANSPOSING_S_S_BONDS		15	-0.50741	-1.30647	0.146091	0.227532	1	423	tags=20%, list=4%, signal=21%
GO_TISSUE_HOMEOSTASIS	GO_TISSUE_HOMEOSTASIS		98	-0.345641	-1.30598	0.059081	0.227969	1	1623	tags=24%, list=14%, signal=28%
GO_REGULATION_OF_KERATINOCYTE_DIFFERENTIATION	GO_REGULATION_OF_KERATINOCYTE_DIFFERENTIATION		15	-0.509347	-1.30555	0.153846	0.228283	1	2513	tags=40%, list=22%, signal=51%
GO_POSITIVE_REGULATION_OF_INSULIN_SECRETION_INVOLVED_IN_CELLULAR_RESPONSE_TO_GLUCOSE_STIMULUS	GO_POSITIVE_REGULATION_OF_INSULIN_SECRETION_INVOLVED_IN_CELLULAR_RESPONSE_TO_GLUCOSE_STIMULUS		16	-0.51712	-1.30482	0.149254	0.228987	1	983	tags=31%, list=8%, signal=34%
GO_PROTEIN_EXIT_FROM_ENDOPLASMIC_RETICULUM	GO_PROTEIN_EXIT_FROM_ENDOPLASMIC_RETICULUM		19	-0.479444	-1.30476	0.141988	0.228838	1	1287	tags=26%, list=11%, signal=30%
GO_REGULATION_OF_CELLULAR_RESPONSE_TO_INSULIN_STIMULUS	GO_REGULATION_OF_CELLULAR_RESPONSE_TO_INSULIN_STIMULUS		39	-0.408033	-1.30401	0.105495	0.229607	1	2331	tags=38%, list=20%, signal=48%
GO_RECEPTOR_COMPLEX	GO_RECEPTOR_COMPLEX		149	-0.329247	-1.30391	0.0405983	0.229509	1	1551	tags=20%, list=13%, signal=23%
GO_INTEGRIN_BINDING	GO_INTEGRIN_BINDING		57	-0.377961	-1.30372	0.0792291	0.229532	1	1875	tags=25%, list=16%, signal=29%
GO_ORGANELLE_FUSION	GO_ORGANELLE_FUSION		87	-0.357373	-1.3037	0.0610526	0.229307	1	1731	tags=22%, list=15%, signal=25%
GO_REGULATION_OF_PROTEIN_SUMOYLATION	GO_REGULATION_OF_PROTEIN_SUMOYLATION		17	-0.486945	-1.30337	0.150905	0.229495	1	2	tags=6%, list=0%, signal=6%
GO_EXTRINSIC_COMPONENT_OF_PLASMA_MEMBRANE	GO_EXTRINSIC_COMPONENT_OF_PLASMA_MEMBRANE		84	-0.356429	-1.30268	0.065678	0.230133	1	2309	tags=30%, list=20%, signal=37%
GO_CARBOHYDRATE_DERIVATIVE_CATABOLIC_PROCESS	GO_CARBOHYDRATE_DERIVATIVE_CATABOLIC_PROCESS		112	-0.335113	-1.30257	0.0379747	0.230023	1	2391	tags=32%, list=21%, signal=40%
GO_ACTIVE_TRANSMEMBRANE_TRANSPORTER_ACTIVITY	GO_ACTIVE_TRANSMEMBRANE_TRANSPORTER_ACTIVITY		174	-0.317462	-1.30117	0.0292793	0.23164	1	1453	tags=20%, list=13%, signal=22%
GO_GLYOXYLATE_METABOLIC_PROCESS	GO_GLYOXYLATE_METABOLIC_PROCESS		20	-0.475041	-1.30092	0.153226	0.231732	1	1505	tags=35%, list=13%, signal=40%
GO_POSITIVE_REGULATION_OF_NUCLEOCYTOPLASMIC_TRANSPORT	GO_POSITIVE_REGULATION_OF_NUCLEOCYTOPLASMIC_TRANSPORT		83	-0.359759	-1.30073	0.0742358	0.231738	1	1741	tags=27%, list=15%, signal=31%
GO_PROTEOGLYCAN_BINDING	GO_PROTEOGLYCAN_BINDING		15	-0.510065	-1.30055	0.159091	0.231759	1	1412	tags=27%, list=12%, signal=30%
GO_TUMOR_NECROSIS_FACTOR_MEDIATED_SIGNALING_PATHWAY	GO_TUMOR_NECROSIS_FACTOR_MEDIATED_SIGNALING_PATHWAY		101	-0.340411	-1.29963	0.0595745	0.232707	1	1822	tags=27%, list=16%, signal=31%
GO_CENTRAL_NERVOUS_SYSTEM_NEURON_DIFFERENTIATION	GO_CENTRAL_NERVOUS_SYSTEM_NEURON_DIFFERENTIATION		63	-0.372776	-1.29949	0.123482	0.232655	1	1718	tags=24%, list=15%, signal=28%
GO_REGULATION_OF_EXTENT_OF_CELL_GROWTH	GO_REGULATION_OF_EXTENT_OF_CELL_GROWTH		55	-0.387915	-1.29929	0.0887446	0.232683	1	3231	tags=49%, list=28%, signal=68%
GO_REGULATION_OF_ACTIN_FILAMENT_BUNDLE_ASSEMBLY	GO_REGULATION_OF_ACTIN_FILAMENT_BUNDLE_ASSEMBLY		47	-0.391549	-1.29882	0.132075	0.233065	1	1519	tags=17%, list=13%, signal=20%
GO_REGULATION_OF_INTERFERON_BETA_PRODUCTION	GO_REGULATION_OF_INTERFERON_BETA_PRODUCTION		38	-0.412411	-1.29881	0.12605	0.232836	1	1349	tags=18%, list=12%, signal=21%
GO_KIDNEY_MORPHOGENESIS	GO_KIDNEY_MORPHOGENESIS		34	-0.422221	-1.29832	0.123431	0.233351	1	2512	tags=38%, list=22%, signal=49%
GO_NEGATIVE_REGULATION_OF_CELL_MORPHOGENESIS_INVOLVED_IN_DIFFERENTIATION	GO_NEGATIVE_REGULATION_OF_CELL_MORPHOGENESIS_INVOLVED_IN_DIFFERENTIATION		58	-0.373997	-1.29832	0.081761	0.23311	1	3111	tags=38%, list=27%, signal=52%
GO_ORGANOPHOSPHATE_ESTER_TRANSPORT	GO_ORGANOPHOSPHATE_ESTER_TRANSPORT		55	-0.379869	-1.29799	0.0797414	0.23332	1	1304	tags=22%, list=11%, signal=24%
GO_REGULATION_OF_PEPTIDASE_ACTIVITY	GO_REGULATION_OF_PEPTIDASE_ACTIVITY		225	-0.30592	-1.29722	0.0313901	0.234154	1	1821	tags=21%, list=16%, signal=25%
GO_REGULATION_OF_B_CELL_APOPTOTIC_PROCESS	GO_REGULATION_OF_B_CELL_APOPTOTIC_PROCESS		17	-0.507266	-1.29706	0.158228	0.23414	1	2160	tags=47%, list=19%, signal=58%
GO_POLYSACCHARIDE_METABOLIC_PROCESS	GO_POLYSACCHARIDE_METABOLIC_PROCESS		46	-0.394679	-1.29663	0.0958606	0.234452	1	2292	tags=35%, list=20%, signal=43%
GO_PROTEIN_KINASE_C_BINDING	GO_PROTEIN_KINASE_C_BINDING		35	-0.410254	-1.29647	0.113786	0.234436	1	619	tags=17%, list=5%, signal=18%
GO_ARACHIDONIC_ACID_METABOLIC_PROCESS	GO_ARACHIDONIC_ACID_METABOLIC_PROCESS		19	-0.475799	-1.29538	0.142558	0.235634	1	1126	tags=32%, list=10%, signal=35%
GO_CELLULAR_RESPONSE_TO_IONIZING_RADIATION	GO_CELLULAR_RESPONSE_TO_IONIZING_RADIATION		41	-0.401749	-1.29498	0.12311	0.235918	1	236	tags=10%, list=2%, signal=10%
GO_ENSHEATHMENT_OF_NEURONS	GO_ENSHEATHMENT_OF_NEURONS		51	-0.389103	-1.29394	0.122736	0.237106	1	2648	tags=33%, list=23%, signal=43%
GO_PEPTIDYL_SERINE_MODIFICATION	GO_PEPTIDYL_SERINE_MODIFICATION		105	-0.341634	-1.2937	0.056962	0.237161	1	3194	tags=41%, list=28%, signal=56%
GO_OUTER_MEMBRANE	GO_OUTER_MEMBRANE		135	-0.324704	-1.29288	0.0480167	0.238037	1	2209	tags=25%, list=19%, signal=31%
GO_REGULATION_OF_PHOSPHOLIPID_METABOLIC_PROCESS	GO_REGULATION_OF_PHOSPHOLIPID_METABOLIC_PROCESS		40	-0.411937	-1.29279	0.131034	0.237907	1	1222	tags=28%, list=11%, signal=31%
GO_REGULATION_OF_MICROTUBULE_POLYMERIZATION	GO_REGULATION_OF_MICROTUBULE_POLYMERIZATION		24	-0.448549	-1.29219	0.154	0.238473	1	827	tags=21%, list=7%, signal=22%
GO_POSITIVE_REGULATION_OF_RECEPTOR_ACTIVITY	GO_POSITIVE_REGULATION_OF_RECEPTOR_ACTIVITY		26	-0.450504	-1.29187	0.140351	0.238633	1	2181	tags=31%, list=19%, signal=38%
GO_REGULATION_OF_MYOTUBE_DIFFERENTIATION	GO_REGULATION_OF_MYOTUBE_DIFFERENTIATION		29	-0.436887	-1.29179	0.123644	0.238492	1	366	tags=14%, list=3%, signal=14%
GO_CAMERA_TYPE_EYE_MORPHOGENESIS	GO_CAMERA_TYPE_EYE_MORPHOGENESIS		43	-0.401632	-1.29156	0.113208	0.238536	1	1601	tags=23%, list=14%, signal=27%
GO_FLAVIN_ADENINE_DINUCLEOTIDE_BINDING	GO_FLAVIN_ADENINE_DINUCLEOTIDE_BINDING		45	-0.392937	-1.29143	0.113248	0.238464	1	1786	tags=22%, list=15%, signal=26%
GO_POSITIVE_REGULATION_OF_GLIOGENESIS	GO_POSITIVE_REGULATION_OF_GLIOGENESIS		29	-0.431135	-1.29062	0.144628	0.239415	1	2075	tags=34%, list=18%, signal=42%
GO_RESPONSE_TO_VITAMIN_D	GO_RESPONSE_TO_VITAMIN_D		19	-0.475425	-1.29027	0.128571	0.239683	1	1141	tags=26%, list=10%, signal=29%
GO_POSITIVE_REGULATION_OF_PEPTIDASE_ACTIVITY	GO_POSITIVE_REGULATION_OF_PEPTIDASE_ACTIVITY		117	-0.337548	-1.29008	0.054902	0.239714	1	1349	tags=18%, list=12%, signal=20%
GO_PLATELET_DEGRANULATION	GO_PLATELET_DEGRANULATION		54	-0.38144	-1.28989	0.0828026	0.239748	1	2264	tags=37%, list=20%, signal=46%
GO_REGULATION_OF_ENDOCYTOSIS	GO_REGULATION_OF_ENDOCYTOSIS		122	-0.333127	-1.28984	0.0518672	0.239576	1	1197	tags=19%, list=10%, signal=21%
GO_RESPONSE_TO_METAL_ION	GO_RESPONSE_TO_METAL_ION		196	-0.309693	-1.28976	0.0453564	0.239443	1	1002	tags=17%, list=9%, signal=18%
GO_POSITIVE_REGULATION_OF_APOPTOTIC_SIGNALING_PATHWAY	GO_POSITIVE_REGULATION_OF_APOPTOTIC_SIGNALING_PATHWAY		135	-0.324506	-1.28906	0.0333333	0.240164	1	1102	tags=17%, list=10%, signal=19%
GO_CHONDROCYTE_DIFFERENTIATION	GO_CHONDROCYTE_DIFFERENTIATION		30	-0.435588	-1.28876	0.149028	0.240308	1	1907	tags=33%, list=16%, signal=40%
GO_SNARE_BINDING	GO_SNARE_BINDING		80	-0.354664	-1.28858	0.0782609	0.240296	1	1439	tags=20%, list=12%, signal=23%
GO_ENDOSOME_LUMEN	GO_ENDOSOME_LUMEN		17	-0.488256	-1.28851	0.168514	0.240142	1	1307	tags=29%, list=11%, signal=33%
GO_PROTEOGLYCAN_BIOSYNTHETIC_PROCESS	GO_PROTEOGLYCAN_BIOSYNTHETIC_PROCESS		29	-0.438523	-1.28817	0.14433	0.240402	1	1604	tags=21%, list=14%, signal=24%
GO_POSITIVE_REGULATION_OF_CALCIUM_ION_TRANSPORT	GO_POSITIVE_REGULATION_OF_CALCIUM_ION_TRANSPORT		55	-0.371964	-1.28731	0.0884211	0.241367	1	1865	tags=25%, list=16%, signal=30%
GO_REGULATION_OF_CELL_JUNCTION_ASSEMBLY	GO_REGULATION_OF_CELL_JUNCTION_ASSEMBLY		37	-0.40356	-1.28711	0.119149	0.241377	1	1601	tags=24%, list=14%, signal=28%
GO_EXTRACELLULAR_MATRIX	GO_EXTRACELLULAR_MATRIX		119	-0.32914	-1.28682	0.0718954	0.241547	1	2336	tags=27%, list=20%, signal=33%
GO_REGULATION_OF_COAGULATION	GO_REGULATION_OF_COAGULATION		40	-0.402038	-1.28658	0.107595	0.241626	1	1519	tags=23%, list=13%, signal=26%
GO_RESPONSE_TO_GROWTH_HORMONE	GO_RESPONSE_TO_GROWTH_HORMONE		20	-0.472021	-1.28605	0.140562	0.24209	1	3277	tags=50%, list=28%, signal=70%
GO_GLAND_DEVELOPMENT	GO_GLAND_DEVELOPMENT		211	-0.306075	-1.28508	0.0360934	0.243282	1	1615	tags=22%, list=14%, signal=25%
GO_SECRETORY_GRANULE	GO_SECRETORY_GRANULE		155	-0.319333	-1.28494	0.0315126	0.243259	1	986	tags=15%, list=9%, signal=17%
GO_TETRAPYRROLE_BINDING	GO_TETRAPYRROLE_BINDING		56	-0.373074	-1.28377	0.0887446	0.244649	1	1189	tags=23%, list=10%, signal=26%
GO_NEGATIVE_REGULATION_OF_EXTRINSIC_APOPTOTIC_SIGNALING_PATHWAY	GO_NEGATIVE_REGULATION_OF_EXTRINSIC_APOPTOTIC_SIGNALING_PATHWAY		65	-0.366308	-1.28325	0.0847108	0.245057	1	1821	tags=25%, list=16%, signal=29%
GO_RESPONSE_TO_ALCOHOL	GO_RESPONSE_TO_ALCOHOL		213	-0.304157	-1.28225	0.0207039	0.246225	1	1543	tags=20%, list=13%, signal=22%
GO_RESPONSE_TO_INTERLEUKIN_6	GO_RESPONSE_TO_INTERLEUKIN_6		15	-0.509516	-1.28122	0.161702	0.24744	1	1824	tags=27%, list=16%, signal=32%
GO_REGULATION_OF_FATTY_ACID_BIOSYNTHETIC_PROCESS	GO_REGULATION_OF_FATTY_ACID_BIOSYNTHETIC_PROCESS		22	-0.460103	-1.28095	0.137014	0.247543	1	1262	tags=36%, list=11%, signal=41%
GO_PROTEIN_TYROSINE_PHOSPHATASE_ACTIVITY	GO_PROTEIN_TYROSINE_PHOSPHATASE_ACTIVITY		74	-0.351121	-1.28046	0.090708	0.247957	1	1379	tags=20%, list=12%, signal=23%
GO_POSITIVE_REGULATION_OF_CELL_GROWTH	GO_POSITIVE_REGULATION_OF_CELL_GROWTH		88	-0.342659	-1.28002	0.0561122	0.248257	1	2115	tags=30%, list=18%, signal=36%
GO_RESPONSE_TO_NUTRIENT	GO_RESPONSE_TO_NUTRIENT		117	-0.329476	-1.27978	0.0601202	0.248361	1	1189	tags=16%, list=10%, signal=18%
GO_REGULATION_OF_MUSCLE_CELL_APOPTOTIC_PROCESS	GO_REGULATION_OF_MUSCLE_CELL_APOPTOTIC_PROCESS		27	-0.441461	-1.27956	0.131078	0.248466	1	884	tags=19%, list=8%, signal=20%
GO_ENERGY_RESERVE_METABOLIC_PROCESS	GO_ENERGY_RESERVE_METABOLIC_PROCESS		43	-0.392501	-1.2793	0.102845	0.248572	1	2292	tags=37%, list=20%, signal=46%
GO_CERAMIDE_METABOLIC_PROCESS	GO_CERAMIDE_METABOLIC_PROCESS		50	-0.378639	-1.27872	0.102784	0.249142	1	1658	tags=32%, list=14%, signal=37%
GO_VIRUS_RECEPTOR_ACTIVITY	GO_VIRUS_RECEPTOR_ACTIVITY		38	-0.399592	-1.27855	0.122699	0.249144	1	1596	tags=34%, list=14%, signal=40%
GO_POSITIVE_REGULATION_OF_NEURON_APOPTOTIC_PROCESS	GO_POSITIVE_REGULATION_OF_NEURON_APOPTOTIC_PROCESS		37	-0.404189	-1.27812	0.106029	0.24947	1	878	tags=16%, list=8%, signal=17%
GO_CELL_CELL_SIGNALING	GO_CELL_CELL_SIGNALING		275	-0.295702	-1.27701	0.0263736	0.250804	1	1688	tags=21%, list=15%, signal=24%
GO_POSITIVE_REGULATION_OF_ENDOTHELIAL_CELL_MIGRATION	GO_POSITIVE_REGULATION_OF_ENDOTHELIAL_CELL_MIGRATION		38	-0.395336	-1.27692	0.130705	0.250649	1	2225	tags=37%, list=19%, signal=45%
GO_CYCLIN_DEPENDENT_PROTEIN_KINASE_HOLOENZYME_COMPLEX	GO_CYCLIN_DEPENDENT_PROTEIN_KINASE_HOLOENZYME_COMPLEX		29	-0.42554	-1.27675	0.153361	0.250653	1	1799	tags=31%, list=16%, signal=37%
GO_ACTIVATION_OF_MAPK_ACTIVITY	GO_ACTIVATION_OF_MAPK_ACTIVITY		89	-0.345891	-1.27671	0.0654397	0.250485	1	2599	tags=27%, list=22%, signal=35%
GO_LYMPHOCYTE_COSTIMULATION	GO_LYMPHOCYTE_COSTIMULATION		54	-0.382656	-1.27661	0.123667	0.250393	1	1752	tags=31%, list=15%, signal=37%
GO_GLYCOSPHINGOLIPID_METABOLIC_PROCESS	GO_GLYCOSPHINGOLIPID_METABOLIC_PROCESS		40	-0.400765	-1.27607	0.130785	0.250926	1	2503	tags=52%, list=22%, signal=67%
GO_REGULATION_OF_CALCIUM_ION_TRANSPORT_INTO_CYTOSOL	GO_REGULATION_OF_CALCIUM_ION_TRANSPORT_INTO_CYTOSOL		48	-0.381783	-1.27563	0.11349	0.251303	1	2168	tags=31%, list=19%, signal=38%
GO_SMALL_GTPASE_MEDIATED_SIGNAL_TRANSDUCTION	GO_SMALL_GTPASE_MEDIATED_SIGNAL_TRANSDUCTION		248	-0.299642	-1.27495	0.0336134	0.252024	1	2439	tags=32%, list=21%, signal=39%
GO_NUCLEAR_INNER_MEMBRANE	GO_NUCLEAR_INNER_MEMBRANE		36	-0.406332	-1.27469	0.138229	0.252124	1	1169	tags=25%, list=10%, signal=28%
GO_NEGATIVE_REGULATION_OF_DEVELOPMENTAL_GROWTH	GO_NEGATIVE_REGULATION_OF_DEVELOPMENTAL_GROWTH		41	-0.385629	-1.2743	0.122917	0.252341	1	1924	tags=29%, list=17%, signal=35%
GO_NEGATIVE_REGULATION_OF_EPITHELIAL_CELL_DIFFERENTIATION	GO_NEGATIVE_REGULATION_OF_EPITHELIAL_CELL_DIFFERENTIATION		16	-0.498869	-1.27412	0.172764	0.252352	1	1290	tags=31%, list=11%, signal=35%
GO_PHOSPHOLIPID_CATABOLIC_PROCESS	GO_PHOSPHOLIPID_CATABOLIC_PROCESS		18	-0.474828	-1.27325	0.162162	0.253382	1	2168	tags=39%, list=19%, signal=48%
GO_DOUBLE_STRANDED_DNA_BINDING	GO_DOUBLE_STRANDED_DNA_BINDING		463	-0.278742	-1.27203	0.0158014	0.254912	1	1870	tags=20%, list=16%, signal=23%
GO_POSITIVE_REGULATION_OF_PATHWAY_RESTRICTED_SMAD_PROTEIN_PHOSPHORYLATION	GO_POSITIVE_REGULATION_OF_PATHWAY_RESTRICTED_SMAD_PROTEIN_PHOSPHORYLATION		19	-0.470863	-1.27085	0.175824	0.256373	1	285	tags=16%, list=2%, signal=16%
GO_NEGATIVE_REGULATION_OF_TRANSMEMBRANE_TRANSPORT	GO_NEGATIVE_REGULATION_OF_TRANSMEMBRANE_TRANSPORT		42	-0.396499	-1.27084	0.15222	0.256128	1	2238	tags=24%, list=19%, signal=29%
GO_CEREBELLAR_CORTEX_DEVELOPMENT	GO_CEREBELLAR_CORTEX_DEVELOPMENT		24	-0.445559	-1.27055	0.152542	0.256346	1	3111	tags=46%, list=27%, signal=63%
GO_T_CELL_DIFFERENTIATION_INVOLVED_IN_IMMUNE_RESPONSE	GO_T_CELL_DIFFERENTIATION_INVOLVED_IN_IMMUNE_RESPONSE		23	-0.449787	-1.26942	0.165049	0.257744	1	530	tags=17%, list=5%, signal=18%
GO_REGULATION_OF_MULTI_ORGANISM_PROCESS	GO_REGULATION_OF_MULTI_ORGANISM_PROCESS		329	-0.289016	-1.26859	0.0210773	0.258691	1	1066	tags=15%, list=9%, signal=16%
GO_NEGATIVE_REGULATION_OF_TOR_SIGNALING	GO_NEGATIVE_REGULATION_OF_TOR_SIGNALING		25	-0.435301	-1.26734	0.168317	0.260278	1	2241	tags=24%, list=19%, signal=30%
GO_GLUCAN_METABOLIC_PROCESS	GO_GLUCAN_METABOLIC_PROCESS		36	-0.407362	-1.26684	0.150655	0.260743	1	2292	tags=39%, list=20%, signal=48%
GO_IRON_ION_TRANSPORT	GO_IRON_ION_TRANSPORT		35	-0.404025	-1.26489	0.144309	0.263232	1	1760	tags=26%, list=15%, signal=30%
GO_VESICLE_ORGANIZATION	GO_VESICLE_ORGANIZATION		197	-0.306967	-1.26442	0.0478261	0.263643	1	1518	tags=20%, list=13%, signal=22%
GO_GLOMERULUS_DEVELOPMENT	GO_GLOMERULUS_DEVELOPMENT		20	-0.456623	-1.26419	0.163022	0.263745	1	1290	tags=25%, list=11%, signal=28%
GO_MULTICELLULAR_ORGANISM_GROWTH	GO_MULTICELLULAR_ORGANISM_GROWTH		47	-0.381149	-1.26342	0.139583	0.264586	1	2602	tags=43%, list=22%, signal=55%
GO_CELLULAR_RESPONSE_TO_GLUCAGON_STIMULUS	GO_CELLULAR_RESPONSE_TO_GLUCAGON_STIMULUS		21	-0.454385	-1.26227	0.167969	0.266074	1	1904	tags=29%, list=16%, signal=34%
GO_CYTOKINE_PRODUCTION	GO_CYTOKINE_PRODUCTION		79	-0.349317	-1.2622	0.0909091	0.265902	1	2369	tags=34%, list=20%, signal=43%
GO_REGULATION_OF_MUSCLE_CELL_DIFFERENTIATION	GO_REGULATION_OF_MUSCLE_CELL_DIFFERENTIATION		91	-0.33969	-1.26128	0.106754	0.267001	1	1546	tags=20%, list=13%, signal=23%
GO_HINDBRAIN_DEVELOPMENT	GO_HINDBRAIN_DEVELOPMENT		69	-0.353022	-1.26085	0.108	0.267369	1	3146	tags=45%, list=27%, signal=61%
GO_TRANS_GOLGI_NETWORK_MEMBRANE	GO_TRANS_GOLGI_NETWORK_MEMBRANE		63	-0.362464	-1.26007	0.104925	0.268267	1	3208	tags=41%, list=28%, signal=57%
GO_REGULATION_OF_CELLULAR_PROTEIN_LOCALIZATION	GO_REGULATION_OF_CELLULAR_PROTEIN_LOCALIZATION		398	-0.283365	-1.25941	0.0275424	0.268999	1	1105	tags=15%, list=10%, signal=16%
GO_NEGATIVE_REGULATION_OF_CARBOHYDRATE_METABOLIC_PROCESS	GO_NEGATIVE_REGULATION_OF_CARBOHYDRATE_METABOLIC_PROCESS		26	-0.435361	-1.25886	0.169772	0.269578	1	792	tags=15%, list=7%, signal=16%
GO_NEGATIVE_REGULATION_OF_RESPONSE_TO_EXTERNAL_STIMULUS	GO_NEGATIVE_REGULATION_OF_RESPONSE_TO_EXTERNAL_STIMULUS		140	-0.31521	-1.2587	0.0620985	0.269547	1	767	tags=15%, list=7%, signal=16%
GO_GLYCEROLIPID_METABOLIC_PROCESS	GO_GLYCEROLIPID_METABOLIC_PROCESS		234	-0.295664	-1.25862	0.0262582	0.269403	1	2034	tags=21%, list=18%, signal=25%
GO_CLATHRIN_COATED_VESICLE	GO_CLATHRIN_COATED_VESICLE		98	-0.338892	-1.25845	0.105263	0.269407	1	1918	tags=26%, list=17%, signal=30%
GO_HORMONE_TRANSPORT	GO_HORMONE_TRANSPORT		34	-0.407495	-1.2579	0.142566	0.269981	1	1870	tags=26%, list=16%, signal=31%
GO_REGULATION_OF_MAST_CELL_ACTIVATION	GO_REGULATION_OF_MAST_CELL_ACTIVATION		31	-0.414624	-1.25683	0.150106	0.271441	1	1489	tags=23%, list=13%, signal=26%
GO_SIGNAL_TRANSDUCTION_BY_PROTEIN_PHOSPHORYLATION	GO_SIGNAL_TRANSDUCTION_BY_PROTEIN_PHOSPHORYLATION		263	-0.294361	-1.2564	0.0378151	0.271887	1	1822	tags=20%, list=16%, signal=23%
GO_LONG_CHAIN_FATTY_ACID_TRANSPORT	GO_LONG_CHAIN_FATTY_ACID_TRANSPORT		24	-0.435284	-1.25631	0.194059	0.271771	1	2223	tags=38%, list=19%, signal=46%
GO_RECEPTOR_MEDIATED_ENDOCYTOSIS	GO_RECEPTOR_MEDIATED_ENDOCYTOSIS		105	-0.331527	-1.25493	0.103734	0.273545	1	840	tags=14%, list=7%, signal=15%
GO_REGULATION_OF_ENDOTHELIAL_CELL_MIGRATION	GO_REGULATION_OF_ENDOTHELIAL_CELL_MIGRATION		59	-0.362101	-1.25491	0.110112	0.273324	1	2283	tags=32%, list=20%, signal=40%
GO_NEGATIVE_REGULATION_OF_JNK_CASCADE	GO_NEGATIVE_REGULATION_OF_JNK_CASCADE		21	-0.456876	-1.2549	0.164032	0.273072	1	2341	tags=33%, list=20%, signal=42%
GO_CELLULAR_RESPONSE_TO_INORGANIC_SUBSTANCE	GO_CELLULAR_RESPONSE_TO_INORGANIC_SUBSTANCE		89	-0.333804	-1.25458	0.0718816	0.273352	1	983	tags=18%, list=8%, signal=19%
GO_GASTRULATION	GO_GASTRULATION		71	-0.356305	-1.25412	0.121901	0.273787	1	502	tags=14%, list=4%, signal=15%
GO_REGULATION_OF_PROTEIN_TARGETING	GO_REGULATION_OF_PROTEIN_TARGETING		210	-0.300658	-1.25371	0.0354906	0.274149	1	1546	tags=20%, list=13%, signal=23%
GO_PROTEOGLYCAN_METABOLIC_PROCESS	GO_PROTEOGLYCAN_METABOLIC_PROCESS		41	-0.390099	-1.25172	0.148472	0.277054	1	1741	tags=24%, list=15%, signal=29%
GO_VACUOLAR_MEMBRANE	GO_VACUOLAR_MEMBRANE		441	-0.27737	-1.25086	0.0136054	0.278133	1	1500	tags=18%, list=13%, signal=20%
GO_HEART_PROCESS	GO_HEART_PROCESS		37	-0.401584	-1.24878	0.131799	0.280961	1	2623	tags=38%, list=23%, signal=49%
GO_SYNAPTIC_VESICLE_LOCALIZATION	GO_SYNAPTIC_VESICLE_LOCALIZATION		56	-0.370021	-1.24863	0.134737	0.280909	1	1043	tags=16%, list=9%, signal=18%
GO_MORPHOGENESIS_OF_AN_EPITHELIAL_SHEET	GO_MORPHOGENESIS_OF_AN_EPITHELIAL_SHEET		28	-0.419348	-1.24796	0.152318	0.281711	1	2436	tags=39%, list=21%, signal=50%
GO_NEGATIVE_REGULATION_OF_CYCLIN_DEPENDENT_PROTEIN_KINASE_ACTIVITY	GO_NEGATIVE_REGULATION_OF_CYCLIN_DEPENDENT_PROTEIN_KINASE_ACTIVITY		21	-0.445961	-1.24732	0.175476	0.282444	1	201	tags=10%, list=2%, signal=10%
GO_BRANCHING_MORPHOGENESIS_OF_AN_EPITHELIAL_TUBE	GO_BRANCHING_MORPHOGENESIS_OF_AN_EPITHELIAL_TUBE		65	-0.360301	-1.24725	0.14128	0.282291	1	1601	tags=23%, list=14%, signal=27%
GO_POSITIVE_REGULATION_OF_SYNAPTIC_TRANSMISSION	GO_POSITIVE_REGULATION_OF_SYNAPTIC_TRANSMISSION		46	-0.379473	-1.24723	0.127983	0.282066	1	2497	tags=30%, list=22%, signal=39%
GO_REGULATION_OF_BODY_FLUID_LEVELS	GO_REGULATION_OF_BODY_FLUID_LEVELS		278	-0.289615	-1.24679	0.0444444	0.282472	1	2148	tags=26%, list=19%, signal=31%
GO_CELLULAR_RESPONSE_TO_ORGANIC_CYCLIC_COMPOUND	GO_CELLULAR_RESPONSE_TO_ORGANIC_CYCLIC_COMPOUND		286	-0.287749	-1.24669	0.0336323	0.28235	1	1546	tags=18%, list=13%, signal=20%
GO_REGULATION_OF_LIPID_KINASE_ACTIVITY	GO_REGULATION_OF_LIPID_KINASE_ACTIVITY		32	-0.409305	-1.24553	0.169072	0.283847	1	665	tags=19%, list=6%, signal=20%
GO_LATE_ENDOSOME	GO_LATE_ENDOSOME		155	-0.309862	-1.24456	0.0746269	0.285207	1	1500	tags=21%, list=13%, signal=23%
GO_SIGNAL_RELEASE	GO_SIGNAL_RELEASE		73	-0.352227	-1.24403	0.119919	0.285802	1	1615	tags=21%, list=14%, signal=24%
GO_NEGATIVE_REGULATION_OF_RECEPTOR_ACTIVITY	GO_NEGATIVE_REGULATION_OF_RECEPTOR_ACTIVITY		16	-0.481723	-1.24226	0.217391	0.288203	1	1273	tags=25%, list=11%, signal=28%
GO_POSITIVE_REGULATION_OF_DENDRITE_DEVELOPMENT	GO_POSITIVE_REGULATION_OF_DENDRITE_DEVELOPMENT		32	-0.40886	-1.2418	0.182773	0.288663	1	204	tags=9%, list=2%, signal=10%
GO_REGULATION_OF_ERBB_SIGNALING_PATHWAY	GO_REGULATION_OF_ERBB_SIGNALING_PATHWAY		55	-0.369395	-1.24175	0.138593	0.288494	1	2196	tags=35%, list=19%, signal=42%
GO_CELLULAR_RESPONSE_TO_NUTRIENT	GO_CELLULAR_RESPONSE_TO_NUTRIENT		26	-0.42502	-1.24166	0.154839	0.288346	1	764	tags=19%, list=7%, signal=21%
GO_ENDOCYTIC_RECYCLING	GO_ENDOCYTIC_RECYCLING		17	-0.477922	-1.2415	0.189076	0.288354	1	853	tags=18%, list=7%, signal=19%
GO_REGULATION_OF_PATHWAY_RESTRICTED_SMAD_PROTEIN_PHOSPHORYLATION	GO_REGULATION_OF_PATHWAY_RESTRICTED_SMAD_PROTEIN_PHOSPHORYLATION		25	-0.420411	-1.24	0.168399	0.290482	1	285	tags=16%, list=2%, signal=16%
GO_POSITIVE_REGULATION_OF_RECEPTOR_MEDIATED_ENDOCYTOSIS	GO_POSITIVE_REGULATION_OF_RECEPTOR_MEDIATED_ENDOCYTOSIS		25	-0.434193	-1.23995	0.197266	0.290297	1	2152	tags=36%, list=19%, signal=44%
GO_GLUTATHIONE_TRANSFERASE_ACTIVITY	GO_GLUTATHIONE_TRANSFERASE_ACTIVITY		21	-0.454575	-1.23964	0.196203	0.290585	1	543	tags=19%, list=5%, signal=20%
GO_RESPONSE_TO_GLUCAGON	GO_RESPONSE_TO_GLUCAGON		29	-0.416047	-1.23955	0.175365	0.290441	1	1977	tags=28%, list=17%, signal=33%
GO_PHAGOCYTOSIS	GO_PHAGOCYTOSIS		116	-0.318919	-1.23771	0.0777538	0.293044	1	2352	tags=27%, list=20%, signal=33%
GO_TRANSITION_METAL_ION_TRANSPORT	GO_TRANSITION_METAL_ION_TRANSPORT		65	-0.353726	-1.23766	0.111349	0.292844	1	1104	tags=15%, list=10%, signal=17%
GO_UNSATURATED_FATTY_ACID_BIOSYNTHETIC_PROCESS	GO_UNSATURATED_FATTY_ACID_BIOSYNTHETIC_PROCESS		26	-0.429122	-1.23761	0.172557	0.292655	1	2598	tags=46%, list=22%, signal=59%
GO_POSITIVE_CHEMOTAXIS	GO_POSITIVE_CHEMOTAXIS		17	-0.471632	-1.23641	0.202479	0.294306	1	2283	tags=35%, list=20%, signal=44%
GO_EXTRACELLULAR_MATRIX_COMPONENT	GO_EXTRACELLULAR_MATRIX_COMPONENT		41	-0.382462	-1.23604	0.15	0.294627	1	2610	tags=29%, list=23%, signal=38%
GO_MATERNAL_PLACENTA_DEVELOPMENT	GO_MATERNAL_PLACENTA_DEVELOPMENT		23	-0.435147	-1.23527	0.190275	0.295517	1	1780	tags=39%, list=15%, signal=46%
GO_RESPONSE_TO_MECHANICAL_STIMULUS	GO_RESPONSE_TO_MECHANICAL_STIMULUS		115	-0.317298	-1.23523	0.089172	0.295315	1	1551	tags=22%, list=13%, signal=25%
GO_PHOSPHATE_TRANSMEMBRANE_TRANSPORTER_ACTIVITY	GO_PHOSPHATE_TRANSMEMBRANE_TRANSPORTER_ACTIVITY		22	-0.428865	-1.23419	0.190083	0.296657	1	2766	tags=32%, list=24%, signal=42%
GO_BASEMENT_MEMBRANE	GO_BASEMENT_MEMBRANE		38	-0.396408	-1.23267	0.165992	0.298827	1	2610	tags=32%, list=23%, signal=41%
GO_POSITIVE_REGULATION_OF_NEUTROPHIL_MIGRATION	GO_POSITIVE_REGULATION_OF_NEUTROPHIL_MIGRATION		16	-0.473568	-1.23138	0.186992	0.300599	1	2045	tags=25%, list=18%, signal=30%
GO_PLASMA_MEMBRANE_REGION	GO_PLASMA_MEMBRANE_REGION		422	-0.274338	-1.23116	0.0278373	0.300655	1	1875	tags=21%, list=16%, signal=25%
GO_INORGANIC_ION_TRANSMEMBRANE_TRANSPORT	GO_INORGANIC_ION_TRANSMEMBRANE_TRANSPORT		251	-0.285148	-1.2311	0.0467706	0.300476	1	2446	tags=27%, list=21%, signal=34%
GO_RUFFLE	GO_RUFFLE		112	-0.320957	-1.23059	0.0976645	0.301105	1	2168	tags=25%, list=19%, signal=30%
GO_REGULATION_OF_BEHAVIOR	GO_REGULATION_OF_BEHAVIOR		26	-0.420524	-1.23018	0.192233	0.301498	1	1483	tags=23%, list=13%, signal=26%
GO_REGULATION_OF_INTERLEUKIN_4_PRODUCTION	GO_REGULATION_OF_INTERLEUKIN_4_PRODUCTION		24	-0.430523	-1.2298	0.170213	0.301818	1	1017	tags=25%, list=9%, signal=27%
GO_REGULATION_OF_EXTRACELLULAR_MATRIX_ORGANIZATION	GO_REGULATION_OF_EXTRACELLULAR_MATRIX_ORGANIZATION		18	-0.454065	-1.2291	0.187243	0.302689	1	2812	tags=44%, list=24%, signal=59%
GO_PANCREAS_DEVELOPMENT	GO_PANCREAS_DEVELOPMENT		30	-0.410342	-1.22902	0.188053	0.30255	1	1860	tags=33%, list=16%, signal=40%
GO_JNK_CASCADE	GO_JNK_CASCADE		63	-0.350221	-1.22863	0.123457	0.302938	1	1926	tags=24%, list=17%, signal=28%
GO_MEMBRANE_FUSION	GO_MEMBRANE_FUSION		99	-0.325979	-1.22853	0.104628	0.30284	1	1731	tags=22%, list=15%, signal=26%
GO_LAMELLIPODIUM	GO_LAMELLIPODIUM		116	-0.315043	-1.2281	0.1	0.303282	1	2352	tags=27%, list=20%, signal=33%
GO_CELLULAR_RESPONSE_TO_ALCOHOL	GO_CELLULAR_RESPONSE_TO_ALCOHOL		70	-0.340841	-1.22706	0.134956	0.304753	1	988	tags=17%, list=9%, signal=19%
GO_MESODERM_DEVELOPMENT	GO_MESODERM_DEVELOPMENT		53	-0.360073	-1.22645	0.15625	0.305459	1	1788	tags=28%, list=15%, signal=33%
GO_POSITIVE_REGULATION_OF_PROTEIN_LOCALIZATION_TO_NUCLEUS	GO_POSITIVE_REGULATION_OF_PROTEIN_LOCALIZATION_TO_NUCLEUS		94	-0.327058	-1.22625	0.130977	0.305531	1	1741	tags=26%, list=15%, signal=30%
GO_EMBRYONIC_ORGAN_MORPHOGENESIS	GO_EMBRYONIC_ORGAN_MORPHOGENESIS		118	-0.315144	-1.22515	0.109649	0.307097	1	1370	tags=13%, list=12%, signal=14%
GO_LEUKOCYTE_MEDIATED_IMMUNITY	GO_LEUKOCYTE_MEDIATED_IMMUNITY		103	-0.326003	-1.2246	0.12474	0.307721	1	2352	tags=27%, list=20%, signal=34%
GO_CELLULAR_RESPONSE_TO_OXIDATIVE_STRESS	GO_CELLULAR_RESPONSE_TO_OXIDATIVE_STRESS		140	-0.309122	-1.22382	0.0910973	0.308775	1	1128	tags=17%, list=10%, signal=19%
GO_NEGATIVE_REGULATION_OF_REGULATED_SECRETORY_PATHWAY	GO_NEGATIVE_REGULATION_OF_REGULATED_SECRETORY_PATHWAY		15	-0.480717	-1.22377	0.204082	0.308568	1	1365	tags=27%, list=12%, signal=30%
GO_LIGAND_DEPENDENT_NUCLEAR_RECEPTOR_BINDING	GO_LIGAND_DEPENDENT_NUCLEAR_RECEPTOR_BINDING		17	-0.453004	-1.22373	0.248954	0.308351	1	1874	tags=35%, list=16%, signal=42%
GO_CELLULAR_CARBOHYDRATE_METABOLIC_PROCESS	GO_CELLULAR_CARBOHYDRATE_METABOLIC_PROCESS		92	-0.327854	-1.22369	0.142549	0.30814	1	2292	tags=30%, list=20%, signal=38%
GO_REGULATION_OF_CELL_SHAPE	GO_REGULATION_OF_CELL_SHAPE		94	-0.326962	-1.22358	0.130081	0.30801	1	2114	tags=24%, list=18%, signal=30%
GO_EYE_PHOTORECEPTOR_CELL_DIFFERENTIATION	GO_EYE_PHOTORECEPTOR_CELL_DIFFERENTIATION		17	-0.458459	-1.2233	0.205285	0.308196	1	2230	tags=41%, list=19%, signal=51%
GO_REGULATION_OF_OSTEOBLAST_DIFFERENTIATION	GO_REGULATION_OF_OSTEOBLAST_DIFFERENTIATION		58	-0.356509	-1.22263	0.151579	0.308988	1	2164	tags=26%, list=19%, signal=32%
GO_POSITIVE_REGULATION_OF_DNA_BINDING	GO_POSITIVE_REGULATION_OF_DNA_BINDING		30	-0.401936	-1.2225	0.180645	0.308938	1	1870	tags=33%, list=16%, signal=40%
GO_REGULATION_OF_CELLULAR_AMINE_METABOLIC_PROCESS	GO_REGULATION_OF_CELLULAR_AMINE_METABOLIC_PROCESS		65	-0.346924	-1.22235	0.132867	0.308899	1	1213	tags=18%, list=10%, signal=21%
GO_MYELOID_DENDRITIC_CELL_ACTIVATION	GO_MYELOID_DENDRITIC_CELL_ACTIVATION		19	-0.461188	-1.22149	0.193483	0.310061	1	2776	tags=47%, list=24%, signal=62%
GO_ASSOCIATIVE_LEARNING	GO_ASSOCIATIVE_LEARNING		39	-0.382365	-1.22084	0.156989	0.310798	1	983	tags=18%, list=8%, signal=20%
GO_RESPONSE_TO_AMINE	GO_RESPONSE_TO_AMINE		31	-0.398325	-1.22069	0.187373	0.310776	1	1891	tags=26%, list=16%, signal=31%
GO_PHOSPHATIDYLINOSITOL_METABOLIC_PROCESS	GO_PHOSPHATIDYLINOSITOL_METABOLIC_PROCESS		137	-0.308991	-1.21984	0.0854503	0.312015	1	2034	tags=21%, list=18%, signal=25%
GO_REGULATION_OF_OXIDATIVE_STRESS_INDUCED_INTRINSIC_APOPTOTIC_SIGNALING_PATHWAY	GO_REGULATION_OF_OXIDATIVE_STRESS_INDUCED_INTRINSIC_APOPTOTIC_SIGNALING_PATHWAY		22	-0.441064	-1.21971	0.215859	0.311951	1	983	tags=18%, list=8%, signal=20%
GO_NEGATIVE_REGULATION_OF_PEPTIDYL_SERINE_PHOSPHORYLATION	GO_NEGATIVE_REGULATION_OF_PEPTIDYL_SERINE_PHOSPHORYLATION		15	-0.46984	-1.21932	0.24	0.312336	1	1438	tags=27%, list=12%, signal=30%
GO_CELLULAR_RESPONSE_TO_VITAMIN	GO_CELLULAR_RESPONSE_TO_VITAMIN		15	-0.481689	-1.21867	0.209446	0.313128	1	660	tags=20%, list=6%, signal=21%
GO_POSITIVE_REGULATION_OF_INTRACELLULAR_PROTEIN_TRANSPORT	GO_POSITIVE_REGULATION_OF_INTRACELLULAR_PROTEIN_TRANSPORT		171	-0.298593	-1.21866	0.098081	0.312867	1	1546	tags=20%, list=13%, signal=23%
GO_PRIMARY_ALCOHOL_METABOLIC_PROCESS	GO_PRIMARY_ALCOHOL_METABOLIC_PROCESS		23	-0.424449	-1.21835	0.200426	0.313138	1	539	tags=22%, list=5%, signal=23%
GO_VOLTAGE_GATED_ION_CHANNEL_ACTIVITY	GO_VOLTAGE_GATED_ION_CHANNEL_ACTIVITY		50	-0.363676	-1.21764	0.160752	0.31406	1	1228	tags=20%, list=11%, signal=22%
GO_MAINTENANCE_OF_LOCATION_IN_CELL	GO_MAINTENANCE_OF_LOCATION_IN_CELL		72	-0.337343	-1.21735	0.146586	0.314303	1	2292	tags=31%, list=20%, signal=38%
GO_REGULATION_OF_PHOSPHATIDYLINOSITOL_3_KINASE_ACTIVITY	GO_REGULATION_OF_PHOSPHATIDYLINOSITOL_3_KINASE_ACTIVITY		24	-0.426077	-1.21677	0.208768	0.314953	1	665	tags=21%, list=6%, signal=22%
GO_RAB_GUANYL_NUCLEOTIDE_EXCHANGE_FACTOR_ACTIVITY	GO_RAB_GUANYL_NUCLEOTIDE_EXCHANGE_FACTOR_ACTIVITY		22	-0.436475	-1.21671	0.204868	0.314769	1	2756	tags=45%, list=24%, signal=60%
GO_TRICARBOXYLIC_ACID_METABOLIC_PROCESS	GO_TRICARBOXYLIC_ACID_METABOLIC_PROCESS		33	-0.403573	-1.21671	0.16044	0.314496	1	1440	tags=27%, list=12%, signal=31%
GO_EMBRYO_DEVELOPMENT	GO_EMBRYO_DEVELOPMENT		476	-0.269025	-1.21651	0.0273973	0.31455	1	1741	tags=18%, list=15%, signal=21%
GO_MULTICELLULAR_ORGANISM_METABOLIC_PROCESS	GO_MULTICELLULAR_ORGANISM_METABOLIC_PROCESS		24	-0.427794	-1.21614	0.186695	0.31491	1	2223	tags=29%, list=19%, signal=36%
GO_INTRINSIC_APOPTOTIC_SIGNALING_PATHWAY_IN_RESPONSE_TO_DNA_DAMAGE	GO_INTRINSIC_APOPTOTIC_SIGNALING_PATHWAY_IN_RESPONSE_TO_DNA_DAMAGE		60	-0.347332	-1.21553	0.158333	0.315683	1	1545	tags=22%, list=13%, signal=25%
GO_ORGANELLE_SUBCOMPARTMENT	GO_ORGANELLE_SUBCOMPARTMENT		234	-0.289001	-1.21229	0.0742268	0.320922	1	1568	tags=18%, list=14%, signal=20%
GO_VESICLE_LOCALIZATION	GO_VESICLE_LOCALIZATION		150	-0.297504	-1.21071	0.0859729	0.323372	1	1043	tags=15%, list=9%, signal=16%
GO_G_PROTEIN_COUPLED_RECEPTOR_SIGNALING_PATHWAY	GO_G_PROTEIN_COUPLED_RECEPTOR_SIGNALING_PATHWAY		248	-0.28263	-1.21058	0.0650759	0.323306	1	1850	tags=19%, list=16%, signal=23%
GO_CATION_CHANNEL_ACTIVITY	GO_CATION_CHANNEL_ACTIVITY		92	-0.325228	-1.21047	0.149451	0.323204	1	1228	tags=20%, list=11%, signal=22%
GO_MEMBRANE_RAFT_ORGANIZATION	GO_MEMBRANE_RAFT_ORGANIZATION		15	-0.465623	-1.2101	0.253638	0.323574	1	783	tags=27%, list=7%, signal=29%
GO_REGULATION_OF_MULTICELLULAR_ORGANISM_GROWTH	GO_REGULATION_OF_MULTICELLULAR_ORGANISM_GROWTH		39	-0.37369	-1.21	0.187364	0.323456	1	3064	tags=44%, list=26%, signal=59%
GO_REGULATION_OF_PHOSPHATASE_ACTIVITY	GO_REGULATION_OF_PHOSPHATASE_ACTIVITY		84	-0.32666	-1.20964	0.136802	0.323825	1	3457	tags=43%, list=30%, signal=61%
GO_COPI_COATED_VESICLE	GO_COPI_COATED_VESICLE		20	-0.440543	-1.209	0.2103	0.324707	1	1780	tags=30%, list=15%, signal=35%
GO_REACTIVE_OXYGEN_SPECIES_METABOLIC_PROCESS	GO_REACTIVE_OXYGEN_SPECIES_METABOLIC_PROCESS		56	-0.348	-1.20874	0.163022	0.324887	1	1229	tags=21%, list=11%, signal=24%
GO_POSITIVE_REGULATION_OF_MUSCLE_CONTRACTION	GO_POSITIVE_REGULATION_OF_MUSCLE_CONTRACTION		21	-0.440593	-1.20869	0.221782	0.324677	1	2059	tags=38%, list=18%, signal=46%
GO_CELLULAR_RESPONSE_TO_LIPID	GO_CELLULAR_RESPONSE_TO_LIPID		279	-0.276737	-1.20869	0.0606061	0.324393	1	1551	tags=18%, list=13%, signal=20%
GO_REGULATION_OF_OLIGODENDROCYTE_DIFFERENTIATION	GO_REGULATION_OF_OLIGODENDROCYTE_DIFFERENTIATION		20	-0.441806	-1.20795	0.222462	0.325388	1	1532	tags=30%, list=13%, signal=35%
GO_RESPONSE_TO_ISOQUINOLINE_ALKALOID	GO_RESPONSE_TO_ISOQUINOLINE_ALKALOID		15	-0.472322	-1.20783	0.222222	0.325296	1	1819	tags=20%, list=16%, signal=24%
GO_LOCALIZATION_WITHIN_MEMBRANE	GO_LOCALIZATION_WITHIN_MEMBRANE		91	-0.328576	-1.20776	0.138298	0.325135	1	1518	tags=22%, list=13%, signal=25%
GO_T_CELL_ACTIVATION_INVOLVED_IN_IMMUNE_RESPONSE	GO_T_CELL_ACTIVATION_INVOLVED_IN_IMMUNE_RESPONSE		35	-0.39176	-1.20694	0.177106	0.326298	1	832	tags=20%, list=7%, signal=21%
GO_SNAP_RECEPTOR_ACTIVITY	GO_SNAP_RECEPTOR_ACTIVITY		31	-0.398498	-1.20633	0.186695	0.327045	1	1425	tags=23%, list=12%, signal=26%
GO_REGULATION_OF_NEUTROPHIL_CHEMOTAXIS	GO_REGULATION_OF_NEUTROPHIL_CHEMOTAXIS		15	-0.467597	-1.20632	0.212679	0.326765	1	2045	tags=27%, list=18%, signal=32%
GO_PRESYNAPTIC_PROCESS_INVOLVED_IN_SYNAPTIC_TRANSMISSION	GO_PRESYNAPTIC_PROCESS_INVOLVED_IN_SYNAPTIC_TRANSMISSION		47	-0.362826	-1.20616	0.169772	0.326753	1	1043	tags=17%, list=9%, signal=19%
GO_POSITIVE_REGULATION_OF_CELLULAR_PROTEIN_LOCALIZATION	GO_POSITIVE_REGULATION_OF_CELLULAR_PROTEIN_LOCALIZATION		255	-0.283023	-1.20605	0.0722348	0.326658	1	1546	tags=20%, list=13%, signal=22%
GO_PROTEASE_BINDING	GO_PROTEASE_BINDING		68	-0.340816	-1.20502	0.154378	0.32818	1	1769	tags=25%, list=15%, signal=29%
GO_PLACENTA_DEVELOPMENT	GO_PLACENTA_DEVELOPMENT		82	-0.329995	-1.20442	0.143763	0.328951	1	1821	tags=27%, list=16%, signal=32%
GO_INTERACTION_WITH_HOST	GO_INTERACTION_WITH_HOST		91	-0.324826	-1.20414	0.143725	0.329182	1	1596	tags=24%, list=14%, signal=28%
GO_INTRINSIC_COMPONENT_OF_GOLGI_MEMBRANE	GO_INTRINSIC_COMPONENT_OF_GOLGI_MEMBRANE		39	-0.384188	-1.20359	0.200873	0.329865	1	1193	tags=18%, list=10%, signal=20%
GO_MICROVILLUS_ORGANIZATION	GO_MICROVILLUS_ORGANIZATION		15	-0.455074	-1.20353	0.223176	0.329656	1	3076	tags=53%, list=27%, signal=73%
GO_RESPONSE_TO_IRON_ION	GO_RESPONSE_TO_IRON_ION		21	-0.427152	-1.20341	0.217105	0.329591	1	1002	tags=24%, list=9%, signal=26%
GO_ZINC_II_ION_TRANSPORT	GO_ZINC_II_ION_TRANSPORT		17	-0.442505	-1.20296	0.226891	0.330085	1	2297	tags=29%, list=20%, signal=37%
GO_ANTERIOR_POSTERIOR_PATTERN_SPECIFICATION	GO_ANTERIOR_POSTERIOR_PATTERN_SPECIFICATION		89	-0.322476	-1.20286	0.152263	0.329951	1	1857	tags=26%, list=16%, signal=31%
GO_REGULATION_OF_MUSCLE_ADAPTATION	GO_REGULATION_OF_MUSCLE_ADAPTATION		40	-0.382117	-1.20257	0.17773	0.330175	1	2710	tags=43%, list=23%, signal=55%
GO_FC_EPSILON_RECEPTOR_SIGNALING_PATHWAY	GO_FC_EPSILON_RECEPTOR_SIGNALING_PATHWAY		115	-0.312668	-1.20251	0.127883	0.329983	1	1754	tags=18%, list=15%, signal=21%
GO_PROTEIN_REFOLDING	GO_PROTEIN_REFOLDING		17	-0.460011	-1.20222	0.21328	0.33023	1	972	tags=24%, list=8%, signal=26%
GO_OLFACTORY_LOBE_DEVELOPMENT	GO_OLFACTORY_LOBE_DEVELOPMENT		18	-0.457052	-1.20122	0.22547	0.331684	1	470	tags=11%, list=4%, signal=12%
GO_NEGATIVE_REGULATION_OF_INTRACELLULAR_PROTEIN_TRANSPORT	GO_NEGATIVE_REGULATION_OF_INTRACELLULAR_PROTEIN_TRANSPORT		69	-0.338458	-1.20117	0.165306	0.331493	1	1188	tags=17%, list=10%, signal=19%
GO_ANCHORED_COMPONENT_OF_MEMBRANE	GO_ANCHORED_COMPONENT_OF_MEMBRANE		45	-0.366101	-1.19842	0.169072	0.335852	1	2192	tags=33%, list=19%, signal=41%
GO_ANTIGEN_PROCESSING_AND_PRESENTATION_OF_PEPTIDE_OR_POLYSACCHARIDE_ANTIGEN_VIA_MHC_CLASS_II	GO_ANTIGEN_PROCESSING_AND_PRESENTATION_OF_PEPTIDE_OR_POLYSACCHARIDE_ANTIGEN_VIA_MHC_CLASS_II		76	-0.335202	-1.19699	0.146288	0.33818	1	1216	tags=18%, list=11%, signal=20%
GO_NEURAL_CREST_CELL_MIGRATION	GO_NEURAL_CREST_CELL_MIGRATION		22	-0.430734	-1.19668	0.21281	0.338463	1	1466	tags=32%, list=13%, signal=36%
GO_NUCLEOTIDE_SUGAR_METABOLIC_PROCESS	GO_NUCLEOTIDE_SUGAR_METABOLIC_PROCESS		30	-0.398529	-1.19616	0.228346	0.339091	1	1330	tags=27%, list=11%, signal=30%
GO_PROTEIN_KINASE_ACTIVITY	GO_PROTEIN_KINASE_ACTIVITY		418	-0.265006	-1.19557	0.0555556	0.33988	1	2282	tags=24%, list=20%, signal=29%
GO_POSITIVE_REGULATION_OF_BLOOD_CIRCULATION	GO_POSITIVE_REGULATION_OF_BLOOD_CIRCULATION		37	-0.38479	-1.19551	0.183807	0.339694	1	1483	tags=30%, list=13%, signal=34%
GO_SNARE_COMPLEX	GO_SNARE_COMPLEX		41	-0.373254	-1.19481	0.183932	0.340627	1	1439	tags=22%, list=12%, signal=25%
GO_REGULATION_OF_LIPID_TRANSPORT	GO_REGULATION_OF_LIPID_TRANSPORT		53	-0.352228	-1.19437	0.184549	0.341118	1	1172	tags=19%, list=10%, signal=21%
GO_ACETYLGALACTOSAMINYLTRANSFERASE_ACTIVITY	GO_ACETYLGALACTOSAMINYLTRANSFERASE_ACTIVITY		18	-0.469456	-1.19393	0.232848	0.341644	1	1488	tags=28%, list=13%, signal=32%
GO_INTERCALATED_DISC	GO_INTERCALATED_DISC		25	-0.418818	-1.19379	0.215768	0.341574	1	2059	tags=32%, list=18%, signal=39%
GO_DIGESTIVE_TRACT_MORPHOGENESIS	GO_DIGESTIVE_TRACT_MORPHOGENESIS		20	-0.433381	-1.19376	0.223382	0.341329	1	1002	tags=25%, list=9%, signal=27%
GO_REGULATION_OF_TRANSMEMBRANE_RECEPTOR_PROTEIN_SERINE_THREONINE_KINASE_SIGNALING_PATHWAY	GO_REGULATION_OF_TRANSMEMBRANE_RECEPTOR_PROTEIN_SERINE_THREONINE_KINASE_SIGNALING_PATHWAY		102	-0.312725	-1.19349	0.135371	0.341517	1	2538	tags=29%, list=22%, signal=37%
GO_DEVELOPMENTAL_MATURATION	GO_DEVELOPMENTAL_MATURATION		99	-0.310298	-1.19284	0.138144	0.342324	1	1870	tags=24%, list=16%, signal=29%
GO_CELLULAR_RESPONSE_TO_HYDROGEN_PEROXIDE	GO_CELLULAR_RESPONSE_TO_HYDROGEN_PEROXIDE		50	-0.361383	-1.1917	0.184154	0.344143	1	1542	tags=26%, list=13%, signal=30%
GO_ORGANIC_HYDROXY_COMPOUND_TRANSPORT	GO_ORGANIC_HYDROXY_COMPOUND_TRANSPORT		74	-0.324529	-1.19092	0.182004	0.345208	1	2074	tags=27%, list=18%, signal=33%
GO_HETEROTRIMERIC_G_PROTEIN_COMPLEX	GO_HETEROTRIMERIC_G_PROTEIN_COMPLEX		16	-0.453247	-1.1904	0.242915	0.345895	1	1163	tags=31%, list=10%, signal=35%
GO_CELL_SUBSTRATE_JUNCTION	GO_CELL_SUBSTRATE_JUNCTION		309	-0.271211	-1.18992	0.0714286	0.346459	1	2161	tags=24%, list=19%, signal=28%
GO_PROTEIN_TARGETING_TO_PLASMA_MEMBRANE	GO_PROTEIN_TARGETING_TO_PLASMA_MEMBRANE		15	-0.46012	-1.18971	0.223629	0.346563	1	1018	tags=27%, list=9%, signal=29%
GO_REGULATION_OF_LEUKOCYTE_DEGRANULATION	GO_REGULATION_OF_LEUKOCYTE_DEGRANULATION		32	-0.394521	-1.18928	0.212944	0.347046	1	1472	tags=22%, list=13%, signal=25%
GO_SIGNALING_ADAPTOR_ACTIVITY	GO_SIGNALING_ADAPTOR_ACTIVITY		58	-0.349323	-1.18898	0.165591	0.347288	1	2331	tags=28%, list=20%, signal=34%
GO_EXTRACELLULAR_MATRIX_BINDING	GO_EXTRACELLULAR_MATRIX_BINDING		20	-0.43606	-1.18846	0.231441	0.347952	1	1601	tags=35%, list=14%, signal=41%
GO_DIGESTIVE_SYSTEM_PROCESS	GO_DIGESTIVE_SYSTEM_PROCESS		28	-0.39922	-1.18756	0.21822	0.349323	1	1543	tags=25%, list=13%, signal=29%
GO_WOUND_HEALING	GO_WOUND_HEALING		265	-0.276905	-1.1874	0.0611354	0.349296	1	2139	tags=26%, list=18%, signal=32%
GO_REGULATION_OF_DENDRITE_DEVELOPMENT	GO_REGULATION_OF_DENDRITE_DEVELOPMENT		64	-0.33353	-1.18699	0.160164	0.349734	1	900	tags=13%, list=8%, signal=13%
GO_RESPONSE_TO_STEROID_HORMONE	GO_RESPONSE_TO_STEROID_HORMONE		277	-0.277894	-1.18687	0.0700219	0.349671	1	1069	tags=13%, list=9%, signal=14%
GO_NEGATIVE_REGULATION_OF_CELLULAR_RESPONSE_TO_INSULIN_STIMULUS	GO_NEGATIVE_REGULATION_OF_CELLULAR_RESPONSE_TO_INSULIN_STIMULUS		21	-0.429573	-1.18645	0.234672	0.350195	1	2102	tags=38%, list=18%, signal=46%
GO_GOLGI_TO_ENDOSOME_TRANSPORT	GO_GOLGI_TO_ENDOSOME_TRANSPORT		16	-0.466581	-1.18618	0.246	0.350451	1	2721	tags=38%, list=23%, signal=49%
GO_MONOVALENT_INORGANIC_CATION_TRANSPORT	GO_MONOVALENT_INORGANIC_CATION_TRANSPORT		198	-0.287064	-1.18592	0.115789	0.35066	1	2649	tags=29%, list=23%, signal=37%
GO_POSITIVE_REGULATION_OF_NEURON_DEATH	GO_POSITIVE_REGULATION_OF_NEURON_DEATH		51	-0.352433	-1.18555	0.190372	0.351047	1	878	tags=12%, list=8%, signal=13%
GO_PEPTIDE_SECRETION	GO_PEPTIDE_SECRETION		25	-0.41702	-1.1852	0.247082	0.351389	1	1615	tags=28%, list=14%, signal=32%
GO_METAL_ION_TRANSMEMBRANE_TRANSPORTER_ACTIVITY	GO_METAL_ION_TRANSMEMBRANE_TRANSPORTER_ACTIVITY		159	-0.294188	-1.18516	0.136929	0.351167	1	2820	tags=33%, list=24%, signal=43%
GO_LIPID_MODIFICATION	GO_LIPID_MODIFICATION		138	-0.298594	-1.18506	0.124473	0.351037	1	2024	tags=22%, list=17%, signal=26%
GO_PROTEIN_DISULFIDE_OXIDOREDUCTASE_ACTIVITY	GO_PROTEIN_DISULFIDE_OXIDOREDUCTASE_ACTIVITY		15	-0.463513	-1.18502	0.242236	0.350808	1	1105	tags=20%, list=10%, signal=22%
GO_MULTI_ORGANISM_MEMBRANE_ORGANIZATION	GO_MULTI_ORGANISM_MEMBRANE_ORGANIZATION		27	-0.406863	-1.18483	0.239741	0.350839	1	1293	tags=26%, list=11%, signal=29%
GO_REGULATION_OF_SYNAPSE_STRUCTURE_OR_ACTIVITY	GO_REGULATION_OF_SYNAPSE_STRUCTURE_OR_ACTIVITY		88	-0.320478	-1.18308	0.166282	0.353678	1	2137	tags=27%, list=18%, signal=33%
GO_BRUSH_BORDER	GO_BRUSH_BORDER		51	-0.356387	-1.18237	0.2	0.354702	1	2327	tags=27%, list=20%, signal=34%
GO_SPHINGOLIPID_METABOLIC_PROCESS	GO_SPHINGOLIPID_METABOLIC_PROCESS		83	-0.320863	-1.18237	0.152866	0.354408	1	2264	tags=33%, list=20%, signal=40%
GO_MODULATION_OF_SYNAPTIC_TRANSMISSION	GO_MODULATION_OF_SYNAPTIC_TRANSMISSION		136	-0.299607	-1.18066	0.119149	0.357297	1	1088	tags=14%, list=9%, signal=15%
GO_NEGATIVE_REGULATION_OF_CELL_SUBSTRATE_ADHESION	GO_NEGATIVE_REGULATION_OF_CELL_SUBSTRATE_ADHESION		33	-0.383265	-1.18047	0.219512	0.357359	1	3236	tags=42%, list=28%, signal=59%
GO_POST_GOLGI_VESICLE_MEDIATED_TRANSPORT	GO_POST_GOLGI_VESICLE_MEDIATED_TRANSPORT		69	-0.331005	-1.1803	0.194093	0.357372	1	1232	tags=19%, list=11%, signal=21%
GO_RHO_PROTEIN_SIGNAL_TRANSDUCTION	GO_RHO_PROTEIN_SIGNAL_TRANSDUCTION		28	-0.40231	-1.17977	0.226337	0.358001	1	2439	tags=39%, list=21%, signal=50%
GO_POSITIVE_REGULATION_OF_CYTOPLASMIC_TRANSPORT	GO_POSITIVE_REGULATION_OF_CYTOPLASMIC_TRANSPORT		193	-0.284039	-1.17817	0.116071	0.360718	1	1546	tags=20%, list=13%, signal=22%
GO_PROTEIN_LIPID_COMPLEX_SUBUNIT_ORGANIZATION	GO_PROTEIN_LIPID_COMPLEX_SUBUNIT_ORGANIZATION		19	-0.438369	-1.1773	0.203782	0.361975	1	895	tags=21%, list=8%, signal=23%
GO_NEUROMUSCULAR_PROCESS_CONTROLLING_BALANCE	GO_NEUROMUSCULAR_PROCESS_CONTROLLING_BALANCE		24	-0.406597	-1.17696	0.231102	0.362339	1	2292	tags=38%, list=20%, signal=47%
GO_CENTRAL_NERVOUS_SYSTEM_DEVELOPMENT	GO_CENTRAL_NERVOUS_SYSTEM_DEVELOPMENT		457	-0.260562	-1.17695	0.0665189	0.362062	1	1885	tags=20%, list=16%, signal=23%
GO_HYDRO_LYASE_ACTIVITY	GO_HYDRO_LYASE_ACTIVITY		33	-0.387252	-1.1768	0.229759	0.362006	1	2162	tags=30%, list=19%, signal=37%
GO_LACTATION	GO_LACTATION		28	-0.39311	-1.17575	0.248408	0.363695	1	2105	tags=39%, list=18%, signal=48%
GO_CELLULAR_PROTEIN_COMPLEX_LOCALIZATION	GO_CELLULAR_PROTEIN_COMPLEX_LOCALIZATION		17	-0.450138	-1.17482	0.238298	0.365198	1	658	tags=24%, list=6%, signal=25%
GO_LUNG_ALVEOLUS_DEVELOPMENT	GO_LUNG_ALVEOLUS_DEVELOPMENT		23	-0.414803	-1.17432	0.257271	0.365813	1	2602	tags=39%, list=22%, signal=50%
GO_APICAL_PART_OF_CELL	GO_APICAL_PART_OF_CELL		167	-0.286902	-1.17423	0.114407	0.365662	1	2299	tags=26%, list=20%, signal=32%
GO_REGULATION_OF_CELLULAR_KETONE_METABOLIC_PROCESS	GO_REGULATION_OF_CELLULAR_KETONE_METABOLIC_PROCESS		114	-0.302023	-1.17364	0.139785	0.366429	1	1317	tags=18%, list=11%, signal=20%
GO_PHOSPHOLIPID_TRANSPORTER_ACTIVITY	GO_PHOSPHOLIPID_TRANSPORTER_ACTIVITY		28	-0.394027	-1.17354	0.247951	0.36632	1	1700	tags=29%, list=15%, signal=33%
GO_PHOSPHORIC_DIESTER_HYDROLASE_ACTIVITY	GO_PHOSPHORIC_DIESTER_HYDROLASE_ACTIVITY		46	-0.35353	-1.17348	0.211268	0.366126	1	2876	tags=39%, list=25%, signal=52%
GO_PHOSPHATIDYLINOSITOL_KINASE_ACTIVITY	GO_PHOSPHATIDYLINOSITOL_KINASE_ACTIVITY		33	-0.383519	-1.17343	0.23444	0.365907	1	1843	tags=24%, list=16%, signal=29%
GO_REGULATION_OF_TYPE_I_INTERFERON_PRODUCTION	GO_REGULATION_OF_TYPE_I_INTERFERON_PRODUCTION		100	-0.307451	-1.17254	0.150776	0.367283	1	784	tags=12%, list=7%, signal=13%
GO_CELL_JUNCTION_ORGANIZATION	GO_CELL_JUNCTION_ORGANIZATION		101	-0.307146	-1.17185	0.170782	0.36835	1	2204	tags=29%, list=19%, signal=35%
GO_PRODUCTION_OF_MOLECULAR_MEDIATOR_OF_IMMUNE_RESPONSE	GO_PRODUCTION_OF_MOLECULAR_MEDIATOR_OF_IMMUNE_RESPONSE		49	-0.357964	-1.17109	0.215606	0.36941	1	885	tags=18%, list=8%, signal=20%
GO_MEMBRANE_DEPOLARIZATION	GO_MEMBRANE_DEPOLARIZATION		21	-0.417526	-1.17088	0.232456	0.369526	1	1141	tags=29%, list=10%, signal=32%
GO_BONE_DEVELOPMENT	GO_BONE_DEVELOPMENT		88	-0.315894	-1.17049	0.183761	0.369909	1	3057	tags=35%, list=26%, signal=48%
GO_NEGATIVE_REGULATION_OF_MAPK_CASCADE	GO_NEGATIVE_REGULATION_OF_MAPK_CASCADE		106	-0.309741	-1.17033	0.157667	0.369901	1	1347	tags=18%, list=12%, signal=20%
GO_RESPONSE_TO_GROWTH_FACTOR	GO_RESPONSE_TO_GROWTH_FACTOR		276	-0.269904	-1.16887	0.0971564	0.372354	1	1754	tags=19%, list=15%, signal=22%
GO_POSITIVE_REGULATION_OF_INTRACELLULAR_TRANSPORT	GO_POSITIVE_REGULATION_OF_INTRACELLULAR_TRANSPORT		254	-0.273426	-1.16832	0.0931677	0.373119	1	1546	tags=19%, list=13%, signal=21%
GO_SEX_CHROMOSOME	GO_SEX_CHROMOSOME		22	-0.422844	-1.1682	0.265446	0.373026	1	459	tags=9%, list=4%, signal=9%
GO_SKIN_EPIDERMIS_DEVELOPMENT	GO_SKIN_EPIDERMIS_DEVELOPMENT		36	-0.372887	-1.16806	0.207965	0.373015	1	1532	tags=19%, list=13%, signal=22%
GO_REGULATION_OF_PROTEIN_LOCALIZATION_TO_NUCLEUS	GO_REGULATION_OF_PROTEIN_LOCALIZATION_TO_NUCLEUS		157	-0.288772	-1.16789	0.13843	0.373014	1	1546	tags=21%, list=13%, signal=24%
GO_FATTY_ACID_BETA_OXIDATION	GO_FATTY_ACID_BETA_OXIDATION		42	-0.37236	-1.16721	0.22379	0.374023	1	1886	tags=24%, list=16%, signal=28%
GO_GOLGI_ORGANIZATION	GO_GOLGI_ORGANIZATION		73	-0.321955	-1.16614	0.191964	0.375779	1	2134	tags=25%, list=18%, signal=30%
GO_INTERACTION_WITH_SYMBIONT	GO_INTERACTION_WITH_SYMBIONT		34	-0.378034	-1.16609	0.231557	0.37557	1	878	tags=18%, list=8%, signal=19%
GO_COGNITION	GO_COGNITION		131	-0.293566	-1.16526	0.148559	0.376847	1	2125	tags=24%, list=18%, signal=29%
GO_GLUTATHIONE_DERIVATIVE_METABOLIC_PROCESS	GO_GLUTATHIONE_DERIVATIVE_METABOLIC_PROCESS		15	-0.456252	-1.16478	0.278926	0.377454	1	543	tags=20%, list=5%, signal=21%
GO_NEGATIVE_REGULATION_OF_EXOCYTOSIS	GO_NEGATIVE_REGULATION_OF_EXOCYTOSIS		19	-0.428761	-1.16434	0.249467	0.377987	1	1365	tags=21%, list=12%, signal=24%
GO_MICROTUBULE_NUCLEATION	GO_MICROTUBULE_NUCLEATION		16	-0.446329	-1.16434	0.240326	0.377683	1	586	tags=13%, list=5%, signal=13%
GO_ENZYME_ACTIVATOR_ACTIVITY	GO_ENZYME_ACTIVATOR_ACTIVITY		316	-0.266807	-1.16418	0.0873362	0.377696	1	1785	tags=18%, list=15%, signal=20%
GO_COLLAGEN_TRIMER	GO_COLLAGEN_TRIMER		18	-0.439601	-1.16386	0.263158	0.377987	1	1751	tags=33%, list=15%, signal=39%
GO_REGULATION_OF_KIDNEY_DEVELOPMENT	GO_REGULATION_OF_KIDNEY_DEVELOPMENT		20	-0.427024	-1.16384	0.247465	0.377715	1	1870	tags=30%, list=16%, signal=36%
GO_REGULATION_OF_PROTEIN_LOCALIZATION_TO_CELL_SURFACE	GO_REGULATION_OF_PROTEIN_LOCALIZATION_TO_CELL_SURFACE		18	-0.43019	-1.16366	0.273101	0.377765	1	507	tags=11%, list=4%, signal=12%
GO_EXTRINSIC_COMPONENT_OF_MEMBRANE	GO_EXTRINSIC_COMPONENT_OF_MEMBRANE		169	-0.283891	-1.16294	0.129512	0.378831	1	1249	tags=15%, list=11%, signal=16%
GO_REGIONALIZATION	GO_REGIONALIZATION		135	-0.292995	-1.16286	0.179704	0.37867	1	1857	tags=24%, list=16%, signal=28%
GO_CYTOPLASMIC_SEQUESTERING_OF_TRANSCRIPTION_FACTOR	GO_CYTOPLASMIC_SEQUESTERING_OF_TRANSCRIPTION_FACTOR		15	-0.454538	-1.16279	0.273859	0.378488	1	760	tags=20%, list=7%, signal=21%
GO_MEGAKARYOCYTE_DIFFERENTIATION	GO_MEGAKARYOCYTE_DIFFERENTIATION		15	-0.464193	-1.1619	0.268499	0.379901	1	3461	tags=53%, list=30%, signal=76%
GO_TRANSCRIPTION_FACTOR_BINDING	GO_TRANSCRIPTION_FACTOR_BINDING		383	-0.259625	-1.16173	0.0815451	0.379926	1	1629	tags=17%, list=14%, signal=19%
GO_CELLULAR_MODIFIED_AMINO_ACID_METABOLIC_PROCESS	GO_CELLULAR_MODIFIED_AMINO_ACID_METABOLIC_PROCESS		135	-0.29334	-1.16122	0.148492	0.38059	1	1576	tags=19%, list=14%, signal=22%
GO_AU_RICH_ELEMENT_BINDING	GO_AU_RICH_ELEMENT_BINDING		17	-0.444859	-1.1611	0.268714	0.380545	1	5	tags=6%, list=0%, signal=6%
GO_REGULATION_OF_NUCLEOSIDE_METABOLIC_PROCESS	GO_REGULATION_OF_NUCLEOSIDE_METABOLIC_PROCESS		29	-0.396308	-1.16065	0.235772	0.381082	1	1033	tags=21%, list=9%, signal=23%
GO_CLATHRIN_COATED_VESICLE_MEMBRANE	GO_CLATHRIN_COATED_VESICLE_MEMBRANE		52	-0.350757	-1.1604	0.231579	0.381276	1	2328	tags=33%, list=20%, signal=41%
GO_REGULATION_OF_CELL_SIZE	GO_REGULATION_OF_CELL_SIZE		98	-0.308875	-1.1602	0.190909	0.381319	1	3231	tags=41%, list=28%, signal=56%
GO_TRANSMEMBRANE_TRANSPORTER_ACTIVITY	GO_TRANSMEMBRANE_TRANSPORTER_ACTIVITY		460	-0.254856	-1.16	0.073991	0.381427	1	1453	tags=17%, list=13%, signal=19%
GO_DOUBLE_STRANDED_RNA_BINDING	GO_DOUBLE_STRANDED_RNA_BINDING		53	-0.343392	-1.1593	0.212851	0.382457	1	1178	tags=23%, list=10%, signal=25%
GO_EPITHELIAL_CELL_PROLIFERATION	GO_EPITHELIAL_CELL_PROLIFERATION		49	-0.35176	-1.15923	0.217489	0.382305	1	1458	tags=24%, list=13%, signal=28%
GO_CELLULAR_RESPONSE_TO_REACTIVE_OXYGEN_SPECIES	GO_CELLULAR_RESPONSE_TO_REACTIVE_OXYGEN_SPECIES		79	-0.321749	-1.15912	0.211618	0.382192	1	1542	tags=22%, list=13%, signal=25%
GO_CELL_JUNCTION_ASSEMBLY	GO_CELL_JUNCTION_ASSEMBLY		77	-0.320971	-1.15899	0.205689	0.382126	1	2204	tags=30%, list=19%, signal=37%
GO_VACUOLAR_LUMEN	GO_VACUOLAR_LUMEN		71	-0.325525	-1.15869	0.196755	0.382395	1	2391	tags=39%, list=21%, signal=49%
GO_NEGATIVE_REGULATION_OF_PROTEIN_MODIFICATION_PROCESS	GO_NEGATIVE_REGULATION_OF_PROTEIN_MODIFICATION_PROCESS		425	-0.255216	-1.15858	0.0657596	0.382312	1	1349	tags=14%, list=12%, signal=15%
GO_REGULATION_OF_VASCULAR_ENDOTHELIAL_GROWTH_FACTOR_PRODUCTION	GO_REGULATION_OF_VASCULAR_ENDOTHELIAL_GROWTH_FACTOR_PRODUCTION		19	-0.427449	-1.15808	0.245652	0.382991	1	1751	tags=47%, list=15%, signal=56%
GO_IRON_ION_HOMEOSTASIS	GO_IRON_ION_HOMEOSTASIS		38	-0.365616	-1.15723	0.21663	0.384365	1	1705	tags=21%, list=15%, signal=25%
GO_RNA_POLYMERASE_II_TRANSCRIPTION_FACTOR_BINDING	GO_RNA_POLYMERASE_II_TRANSCRIPTION_FACTOR_BINDING		73	-0.322062	-1.1566	0.220884	0.385219	1	1977	tags=25%, list=17%, signal=30%
GO_REGULATION_OF_T_CELL_CYTOKINE_PRODUCTION	GO_REGULATION_OF_T_CELL_CYTOKINE_PRODUCTION		17	-0.435945	-1.15592	0.275053	0.386269	1	714	tags=24%, list=6%, signal=25%
GO_REGULATION_OF_GLIOGENESIS	GO_REGULATION_OF_GLIOGENESIS		54	-0.33912	-1.15551	0.221095	0.386733	1	2075	tags=26%, list=18%, signal=31%
GO_HOMEOSTASIS_OF_NUMBER_OF_CELLS	GO_HOMEOSTASIS_OF_NUMBER_OF_CELLS		125	-0.294573	-1.1553	0.166297	0.386861	1	1601	tags=17%, list=14%, signal=19%
GO_POSITIVE_REGULATION_OF_CALCIUM_ION_IMPORT	GO_POSITIVE_REGULATION_OF_CALCIUM_ION_IMPORT		30	-0.389283	-1.15526	0.238589	0.386658	1	543	tags=13%, list=5%, signal=14%
GO_RESPONSE_TO_WOUNDING	GO_RESPONSE_TO_WOUNDING		313	-0.263873	-1.15497	0.0897436	0.386918	1	2139	tags=26%, list=18%, signal=31%
GO_POSITIVE_REGULATION_OF_CELLULAR_COMPONENT_BIOGENESIS	GO_POSITIVE_REGULATION_OF_CELLULAR_COMPONENT_BIOGENESIS		244	-0.272479	-1.15495	0.11465	0.386638	1	2137	tags=23%, list=18%, signal=28%
GO_RESPONSE_TO_PROGESTERONE	GO_RESPONSE_TO_PROGESTERONE		28	-0.390734	-1.15465	0.242915	0.386902	1	681	tags=29%, list=6%, signal=30%
GO_GOLGI_TO_PLASMA_MEMBRANE_TRANSPORT	GO_GOLGI_TO_PLASMA_MEMBRANE_TRANSPORT		34	-0.376186	-1.1543	0.242291	0.387296	1	2038	tags=29%, list=18%, signal=36%
GO_INNATE_IMMUNE_RESPONSE_ACTIVATING_CELL_SURFACE_RECEPTOR_SIGNALING_PATHWAY	GO_INNATE_IMMUNE_RESPONSE_ACTIVATING_CELL_SURFACE_RECEPTOR_SIGNALING_PATHWAY		91	-0.307906	-1.15419	0.172996	0.3872	1	1754	tags=21%, list=15%, signal=24%
GO_TUBE_FORMATION	GO_TUBE_FORMATION		78	-0.314313	-1.15375	0.189542	0.387737	1	1870	tags=21%, list=16%, signal=24%
GO_NEUTRAL_LIPID_METABOLIC_PROCESS	GO_NEUTRAL_LIPID_METABOLIC_PROCESS		43	-0.350222	-1.15316	0.245798	0.388566	1	924	tags=19%, list=8%, signal=20%
GO_POSITIVE_REGULATION_OF_EXTRINSIC_APOPTOTIC_SIGNALING_PATHWAY	GO_POSITIVE_REGULATION_OF_EXTRINSIC_APOPTOTIC_SIGNALING_PATHWAY		37	-0.365126	-1.15275	0.254098	0.389048	1	1983	tags=27%, list=17%, signal=33%
GO_FATTY_ACID_BIOSYNTHETIC_PROCESS	GO_FATTY_ACID_BIOSYNTHETIC_PROCESS		59	-0.331834	-1.15271	0.201961	0.388818	1	2223	tags=34%, list=19%, signal=42%
GO_NUCLEOSIDE_TRIPHOSPHATASE_REGULATOR_ACTIVITY	GO_NUCLEOSIDE_TRIPHOSPHATASE_REGULATOR_ACTIVITY		230	-0.274239	-1.15241	0.123874	0.389132	1	1785	tags=17%, list=15%, signal=20%
GO_POSITIVE_REGULATION_OF_ADENYLATE_CYCLASE_ACTIVITY	GO_POSITIVE_REGULATION_OF_ADENYLATE_CYCLASE_ACTIVITY		20	-0.418999	-1.15224	0.27234	0.389163	1	1289	tags=10%, list=11%, signal=11%
GO_NEUROMUSCULAR_JUNCTION_DEVELOPMENT	GO_NEUROMUSCULAR_JUNCTION_DEVELOPMENT		22	-0.411648	-1.15219	0.254167	0.388954	1	2872	tags=50%, list=25%, signal=66%
GO_EXCRETION	GO_EXCRETION		17	-0.437681	-1.15213	0.301688	0.388779	1	2193	tags=29%, list=19%, signal=36%
GO_REGULATION_OF_ACTIVIN_RECEPTOR_SIGNALING_PATHWAY	GO_REGULATION_OF_ACTIVIN_RECEPTOR_SIGNALING_PATHWAY		15	-0.454112	-1.15127	0.281573	0.390158	1	240	tags=13%, list=2%, signal=14%
GO_PROTEIN_MANNOSYLATION	GO_PROTEIN_MANNOSYLATION		16	-0.437348	-1.15106	0.291845	0.390285	1	2977	tags=56%, list=26%, signal=76%
GO_CARBOHYDRATE_DERIVATIVE_TRANSPORT	GO_CARBOHYDRATE_DERIVATIVE_TRANSPORT		34	-0.373188	-1.1507	0.236626	0.390716	1	2766	tags=38%, list=24%, signal=50%
GO_CELL_PART_MORPHOGENESIS	GO_CELL_PART_MORPHOGENESIS		324	-0.261717	-1.15018	0.104348	0.391411	1	2523	tags=26%, list=22%, signal=32%
GO_REGULATION_OF_MYELOID_CELL_DIFFERENTIATION	GO_REGULATION_OF_MYELOID_CELL_DIFFERENTIATION		129	-0.291053	-1.14991	0.171843	0.39163	1	1016	tags=15%, list=9%, signal=16%
GO_METENCEPHALON_DEVELOPMENT	GO_METENCEPHALON_DEVELOPMENT		51	-0.340039	-1.14911	0.227468	0.392927	1	3111	tags=43%, list=27%, signal=59%
GO_CATION_TRANSMEMBRANE_TRANSPORTER_ACTIVITY	GO_CATION_TRANSMEMBRANE_TRANSPORTER_ACTIVITY		273	-0.267867	-1.14907	0.116114	0.392688	1	1453	tags=18%, list=13%, signal=20%
GO_ORGAN_GROWTH	GO_ORGAN_GROWTH		35	-0.36407	-1.14865	0.24187	0.393174	1	2740	tags=37%, list=24%, signal=49%
GO_REGULATION_OF_LAMELLIPODIUM_ORGANIZATION	GO_REGULATION_OF_LAMELLIPODIUM_ORGANIZATION		26	-0.394924	-1.1484	0.266094	0.39336	1	3678	tags=50%, list=32%, signal=73%
GO_NECROTIC_CELL_DEATH	GO_NECROTIC_CELL_DEATH		23	-0.407549	-1.14601	0.271825	0.397736	1	486	tags=13%, list=4%, signal=14%
GO_LIPID_STORAGE	GO_LIPID_STORAGE		19	-0.426719	-1.14538	0.294363	0.398651	1	644	tags=16%, list=6%, signal=17%
GO_BODY_FLUID_SECRETION	GO_BODY_FLUID_SECRETION		40	-0.35973	-1.14495	0.243952	0.39921	1	2105	tags=33%, list=18%, signal=40%
GO_PHOTORECEPTOR_CELL_DEVELOPMENT	GO_PHOTORECEPTOR_CELL_DEVELOPMENT		15	-0.45215	-1.14476	0.298539	0.399303	1	2075	tags=33%, list=18%, signal=41%
GO_NEGATIVE_REGULATION_OF_MYELOID_LEUKOCYTE_DIFFERENTIATION	GO_NEGATIVE_REGULATION_OF_MYELOID_LEUKOCYTE_DIFFERENTIATION		25	-0.40188	-1.14443	0.260417	0.399631	1	401	tags=16%, list=3%, signal=17%
GO_RAS_PROTEIN_SIGNAL_TRANSDUCTION	GO_RAS_PROTEIN_SIGNAL_TRANSDUCTION		108	-0.29836	-1.14426	0.180293	0.399631	1	2439	tags=34%, list=21%, signal=43%
GO_CELLULAR_RESPONSE_TO_FATTY_ACID	GO_CELLULAR_RESPONSE_TO_FATTY_ACID		33	-0.371653	-1.14421	0.253247	0.399452	1	1476	tags=24%, list=13%, signal=28%
GO_SH3_DOMAIN_BINDING	GO_SH3_DOMAIN_BINDING		74	-0.318382	-1.14379	0.233333	0.400034	1	2866	tags=35%, list=25%, signal=46%
GO_PLATELET_ALPHA_GRANULE_LUMEN	GO_PLATELET_ALPHA_GRANULE_LUMEN		22	-0.410321	-1.14372	0.268839	0.399854	1	2125	tags=32%, list=18%, signal=39%
GO_NEGATIVE_REGULATION_OF_T_CELL_DIFFERENTIATION	GO_NEGATIVE_REGULATION_OF_T_CELL_DIFFERENTIATION		18	-0.427213	-1.1437	0.282158	0.399595	1	296	tags=11%, list=3%, signal=11%
GO_NEGATIVE_REGULATION_OF_TOLL_LIKE_RECEPTOR_SIGNALING_PATHWAY	GO_NEGATIVE_REGULATION_OF_TOLL_LIKE_RECEPTOR_SIGNALING_PATHWAY		15	-0.440441	-1.14351	0.277662	0.399669	1	155	tags=13%, list=1%, signal=13%
GO_HEAD_DEVELOPMENT	GO_HEAD_DEVELOPMENT		387	-0.254177	-1.14349	0.105634	0.399394	1	1937	tags=20%, list=17%, signal=23%
GO_CELLULAR_RESPONSE_TO_AMINO_ACID_STIMULUS	GO_CELLULAR_RESPONSE_TO_AMINO_ACID_STIMULUS		33	-0.372561	-1.14338	0.244094	0.399316	1	366	tags=15%, list=3%, signal=16%
GO_POSITIVE_REGULATION_OF_CATABOLIC_PROCESS	GO_POSITIVE_REGULATION_OF_CATABOLIC_PROCESS		302	-0.263147	-1.14335	0.133038	0.399067	1	1308	tags=13%, list=11%, signal=15%
GO_HYDROLASE_ACTIVITY_HYDROLYZING_O_GLYCOSYL_COMPOUNDS	GO_HYDROLASE_ACTIVITY_HYDROLYZING_O_GLYCOSYL_COMPOUNDS		60	-0.328031	-1.14331	0.229935	0.398828	1	2391	tags=33%, list=21%, signal=42%
GO_RESPONSE_TO_ANTIBIOTIC	GO_RESPONSE_TO_ANTIBIOTIC		36	-0.366926	-1.14308	0.275053	0.39897	1	1542	tags=22%, list=13%, signal=26%
GO_NEGATIVE_REGULATION_OF_SMOOTH_MUSCLE_CELL_PROLIFERATION	GO_NEGATIVE_REGULATION_OF_SMOOTH_MUSCLE_CELL_PROLIFERATION		23	-0.408051	-1.14292	0.257367	0.399011	1	265	tags=13%, list=2%, signal=13%
GO_MAMMARY_GLAND_EPITHELIUM_DEVELOPMENT	GO_MAMMARY_GLAND_EPITHELIUM_DEVELOPMENT		26	-0.394631	-1.14201	0.269388	0.40057	1	1452	tags=27%, list=13%, signal=31%
GO_KINASE_ACTIVATOR_ACTIVITY	GO_KINASE_ACTIVATOR_ACTIVITY		41	-0.350432	-1.14184	0.239175	0.400634	1	2348	tags=29%, list=20%, signal=37%
GO_POSITIVE_REGULATION_OF_CYTOSKELETON_ORGANIZATION	GO_POSITIVE_REGULATION_OF_CYTOSKELETON_ORGANIZATION		115	-0.297077	-1.14109	0.207424	0.401732	1	2225	tags=23%, list=19%, signal=29%
GO_PURINE_CONTAINING_COMPOUND_CATABOLIC_PROCESS	GO_PURINE_CONTAINING_COMPOUND_CATABOLIC_PROCESS		37	-0.361979	-1.14043	0.229508	0.402712	1	1586	tags=19%, list=14%, signal=22%
GO_AUTOPHAGOSOME_MEMBRANE	GO_AUTOPHAGOSOME_MEMBRANE		21	-0.407572	-1.14017	0.273486	0.402939	1	215	tags=10%, list=2%, signal=10%
GO_COATED_MEMBRANE	GO_COATED_MEMBRANE		73	-0.313414	-1.14003	0.230444	0.402903	1	2261	tags=25%, list=20%, signal=30%
GO_NEURON_DIFFERENTIATION	GO_NEURON_DIFFERENTIATION		410	-0.254994	-1.13979	0.0945946	0.403069	1	2502	tags=26%, list=22%, signal=32%
GO_REGULATION_OF_MEMBRANE_LIPID_DISTRIBUTION	GO_REGULATION_OF_MEMBRANE_LIPID_DISTRIBUTION		24	-0.406081	-1.13966	0.275154	0.403043	1	1700	tags=29%, list=15%, signal=34%
GO_NEGATIVE_REGULATION_OF_DNA_BINDING	GO_NEGATIVE_REGULATION_OF_DNA_BINDING		35	-0.364015	-1.13893	0.249471	0.404189	1	878	tags=17%, list=8%, signal=18%
GO_ACTIN_POLYMERIZATION_OR_DEPOLYMERIZATION	GO_ACTIN_POLYMERIZATION_OR_DEPOLYMERIZATION		23	-0.399022	-1.13845	0.282158	0.404854	1	2413	tags=35%, list=21%, signal=44%
GO_PATTERN_SPECIFICATION_PROCESS	GO_PATTERN_SPECIFICATION_PROCESS		182	-0.274695	-1.13629	0.159915	0.408872	1	1860	tags=22%, list=16%, signal=26%
GO_DETECTION_OF_STIMULUS	GO_DETECTION_OF_STIMULUS		115	-0.29414	-1.13519	0.193478	0.410855	1	1768	tags=23%, list=15%, signal=26%
GO_GUANYL_NUCLEOTIDE_EXCHANGE_FACTOR_ACTIVITY	GO_GUANYL_NUCLEOTIDE_EXCHANGE_FACTOR_ACTIVITY		173	-0.274744	-1.13517	0.174442	0.410567	1	1833	tags=21%, list=16%, signal=24%
GO_SULFOTRANSFERASE_ACTIVITY	GO_SULFOTRANSFERASE_ACTIVITY		19	-0.420565	-1.13508	0.286624	0.410452	1	2184	tags=26%, list=19%, signal=32%
GO_GLUTAMATE_RECEPTOR_BINDING	GO_GLUTAMATE_RECEPTOR_BINDING		21	-0.409364	-1.13489	0.270213	0.410527	1	254	tags=10%, list=2%, signal=10%
GO_REGULATION_OF_GLIAL_CELL_DIFFERENTIATION	GO_REGULATION_OF_GLIAL_CELL_DIFFERENTIATION		37	-0.360371	-1.13458	0.282105	0.410821	1	1532	tags=24%, list=13%, signal=28%
GO_SODIUM_CHANNEL_REGULATOR_ACTIVITY	GO_SODIUM_CHANNEL_REGULATOR_ACTIVITY		15	-0.436296	-1.13436	0.288747	0.410946	1	838	tags=13%, list=7%, signal=14%
GO_REGULATION_OF_EXOSOMAL_SECRETION	GO_REGULATION_OF_EXOSOMAL_SECRETION		16	-0.444236	-1.1335	0.317125	0.412373	1	913	tags=13%, list=8%, signal=14%
GO_LYSOSOMAL_LUMEN	GO_LYSOSOMAL_LUMEN		56	-0.326484	-1.13264	0.247934	0.413882	1	2391	tags=43%, list=21%, signal=54%
GO_REGULATION_OF_STEM_CELL_DIFFERENTIATION	GO_REGULATION_OF_STEM_CELL_DIFFERENTIATION		63	-0.32148	-1.13221	0.252654	0.414429	1	1791	tags=27%, list=15%, signal=32%
GO_CATION_CHANNEL_COMPLEX	GO_CATION_CHANNEL_COMPLEX		45	-0.343751	-1.13205	0.238193	0.414428	1	1228	tags=18%, list=11%, signal=20%
GO_REGULATION_OF_PROTEIN_AUTOPHOSPHORYLATION	GO_REGULATION_OF_PROTEIN_AUTOPHOSPHORYLATION		24	-0.392675	-1.13173	0.287755	0.41478	1	2053	tags=33%, list=18%, signal=40%
GO_REGULATION_OF_MAST_CELL_ACTIVATION_INVOLVED_IN_IMMUNE_RESPONSE	GO_REGULATION_OF_MAST_CELL_ACTIVATION_INVOLVED_IN_IMMUNE_RESPONSE		25	-0.384262	-1.13143	0.289474	0.415023	1	1472	tags=20%, list=13%, signal=23%
GO_AP_TYPE_MEMBRANE_COAT_ADAPTOR_COMPLEX	GO_AP_TYPE_MEMBRANE_COAT_ADAPTOR_COMPLEX		32	-0.365899	-1.13138	0.256579	0.414823	1	1918	tags=28%, list=17%, signal=34%
GO_LIPID_LOCALIZATION	GO_LIPID_LOCALIZATION		149	-0.286895	-1.13121	0.209607	0.414816	1	2311	tags=26%, list=20%, signal=31%
GO_POSITIVE_REGULATION_OF_MESENCHYMAL_CELL_PROLIFERATION	GO_POSITIVE_REGULATION_OF_MESENCHYMAL_CELL_PROLIFERATION		16	-0.434168	-1.13083	0.32	0.415288	1	2257	tags=38%, list=19%, signal=47%
GO_INCLUSION_BODY	GO_INCLUSION_BODY		51	-0.339569	-1.13054	0.257271	0.415568	1	925	tags=16%, list=8%, signal=17%
GO_NEURON_DEVELOPMENT	GO_NEURON_DEVELOPMENT		330	-0.255189	-1.13048	0.107623	0.415375	1	2502	tags=26%, list=22%, signal=33%
GO_RAB_GTPASE_BINDING	GO_RAB_GTPASE_BINDING		88	-0.303514	-1.13005	0.219298	0.415981	1	2481	tags=25%, list=21%, signal=32%
GO_POSTTRANSCRIPTIONAL_GENE_SILENCING	GO_POSTTRANSCRIPTIONAL_GENE_SILENCING		29	-0.380522	-1.12882	0.298137	0.41816	1	1430	tags=21%, list=12%, signal=24%
GO_NEGATIVE_REGULATION_OF_PEPTIDYL_TYROSINE_PHOSPHORYLATION	GO_NEGATIVE_REGULATION_OF_PEPTIDYL_TYROSINE_PHOSPHORYLATION		26	-0.389086	-1.12806	0.273885	0.419443	1	1273	tags=23%, list=11%, signal=26%
GO_EXTRACELLULAR_MATRIX_DISASSEMBLY	GO_EXTRACELLULAR_MATRIX_DISASSEMBLY		24	-0.396023	-1.12797	0.292434	0.419278	1	178	tags=8%, list=2%, signal=8%
GO_CELLULAR_RESPONSE_TO_ABIOTIC_STIMULUS	GO_CELLULAR_RESPONSE_TO_ABIOTIC_STIMULUS		171	-0.276398	-1.12746	0.180587	0.420022	1	236	tags=6%, list=2%, signal=6%
GO_POSITIVE_REGULATION_OF_WOUND_HEALING	GO_POSITIVE_REGULATION_OF_WOUND_HEALING		26	-0.389888	-1.12723	0.282051	0.420193	1	2283	tags=35%, list=20%, signal=43%
GO_REGULATION_OF_ORGANIC_ACID_TRANSPORT	GO_REGULATION_OF_ORGANIC_ACID_TRANSPORT		28	-0.376287	-1.12671	0.290456	0.42084	1	1543	tags=21%, list=13%, signal=25%
GO_ENDOCYTOSIS	GO_ENDOCYTOSIS		298	-0.25723	-1.12639	0.152993	0.421197	1	1372	tags=15%, list=12%, signal=17%
GO_BEHAVIOR	GO_BEHAVIOR		228	-0.265637	-1.12634	0.155405	0.421003	1	1545	tags=17%, list=13%, signal=19%
GO_REGULATION_OF_CELL_GROWTH	GO_REGULATION_OF_CELL_GROWTH		226	-0.264264	-1.12609	0.177106	0.421203	1	1601	tags=17%, list=14%, signal=19%
GO_REGULATION_OF_TRANSLATION_IN_RESPONSE_TO_STRESS	GO_REGULATION_OF_TRANSLATION_IN_RESPONSE_TO_STRESS		18	-0.426961	-1.12494	0.310417	0.423209	1	767	tags=17%, list=7%, signal=18%
GO_BONE_CELL_DEVELOPMENT	GO_BONE_CELL_DEVELOPMENT		18	-0.421493	-1.1249	0.293362	0.422973	1	2331	tags=39%, list=20%, signal=49%
GO_RESPONSE_TO_LIGHT_STIMULUS	GO_RESPONSE_TO_LIGHT_STIMULUS		174	-0.277092	-1.12456	0.188312	0.423342	1	1002	tags=13%, list=9%, signal=14%
GO_NEURON_PROJECTION_DEVELOPMENT	GO_NEURON_PROJECTION_DEVELOPMENT		271	-0.263682	-1.12452	0.143469	0.423113	1	2502	tags=27%, list=22%, signal=34%
GO_ENDOPLASMIC_RETICULUM_ORGANIZATION	GO_ENDOPLASMIC_RETICULUM_ORGANIZATION		31	-0.367514	-1.12451	0.288845	0.422828	1	2573	tags=39%, list=22%, signal=50%
GO_POSITIVE_REGULATION_OF_CELLULAR_RESPONSE_TO_INSULIN_STIMULUS	GO_POSITIVE_REGULATION_OF_CELLULAR_RESPONSE_TO_INSULIN_STIMULUS		15	-0.448578	-1.12421	0.32574	0.423119	1	2331	tags=47%, list=20%, signal=58%
GO_REGULATION_OF_VASOCONSTRICTION	GO_REGULATION_OF_VASOCONSTRICTION		25	-0.394775	-1.12334	0.290389	0.42464	1	1748	tags=32%, list=15%, signal=38%
GO_CELLULAR_RESPONSE_TO_ALKALOID	GO_CELLULAR_RESPONSE_TO_ALKALOID		16	-0.435297	-1.12249	0.299389	0.42608	1	543	tags=13%, list=5%, signal=13%
GO_REGULATION_OF_SYSTEMIC_ARTERIAL_BLOOD_PRESSURE	GO_REGULATION_OF_SYSTEMIC_ARTERIAL_BLOOD_PRESSURE		31	-0.369464	-1.12144	0.30989	0.42798	1	660	tags=16%, list=6%, signal=17%
GO_MAMMARY_GLAND_DEVELOPMENT	GO_MAMMARY_GLAND_DEVELOPMENT		62	-0.320123	-1.12118	0.252016	0.428237	1	1601	tags=26%, list=14%, signal=30%
GO_POSITIVE_REGULATION_OF_LIPID_TRANSPORT	GO_POSITIVE_REGULATION_OF_LIPID_TRANSPORT		30	-0.38122	-1.12097	0.26294	0.428327	1	1172	tags=20%, list=10%, signal=22%
GO_PROTEIN_PHOSPHATASE_1_BINDING	GO_PROTEIN_PHOSPHATASE_1_BINDING		15	-0.442459	-1.12048	0.319312	0.428965	1	2083	tags=33%, list=18%, signal=41%
GO_MESODERM_MORPHOGENESIS	GO_MESODERM_MORPHOGENESIS		30	-0.377611	-1.12022	0.264033	0.429167	1	1525	tags=27%, list=13%, signal=31%
GO_POSITIVE_REGULATION_OF_ERBB_SIGNALING_PATHWAY	GO_POSITIVE_REGULATION_OF_ERBB_SIGNALING_PATHWAY		19	-0.409747	-1.12016	0.318565	0.428969	1	1754	tags=32%, list=15%, signal=37%
GO_REGULATION_OF_MRNA_3_END_PROCESSING	GO_REGULATION_OF_MRNA_3_END_PROCESSING		24	-0.393062	-1.12012	0.288344	0.428757	1	505	tags=13%, list=4%, signal=13%
GO_HEMATOPOIETIC_PROGENITOR_CELL_DIFFERENTIATION	GO_HEMATOPOIETIC_PROGENITOR_CELL_DIFFERENTIATION		65	-0.319991	-1.1199	0.259259	0.428899	1	2397	tags=31%, list=21%, signal=39%
GO_REGULATION_OF_NEUROTRANSMITTER_LEVELS	GO_REGULATION_OF_NEUROTRANSMITTER_LEVELS		87	-0.303247	-1.11916	0.260776	0.430104	1	1043	tags=14%, list=9%, signal=15%
GO_MYELIN_SHEATH	GO_MYELIN_SHEATH		131	-0.286269	-1.11906	0.231915	0.429985	1	2136	tags=23%, list=18%, signal=28%
GO_NEGATIVE_REGULATION_OF_CATALYTIC_ACTIVITY	GO_NEGATIVE_REGULATION_OF_CATALYTIC_ACTIVITY		495	-0.246241	-1.11859	0.109091	0.430648	1	1223	tags=13%, list=11%, signal=14%
GO_CELL_ADHESION_MOLECULE_BINDING	GO_CELL_ADHESION_MOLECULE_BINDING		97	-0.297523	-1.11807	0.219512	0.431377	1	1938	tags=22%, list=17%, signal=26%
GO_VISUAL_BEHAVIOR	GO_VISUAL_BEHAVIOR		30	-0.373329	-1.11799	0.281938	0.431206	1	2125	tags=27%, list=18%, signal=33%
GO_FILOPODIUM	GO_FILOPODIUM		58	-0.321109	-1.11768	0.26	0.43155	1	3315	tags=38%, list=29%, signal=53%
GO_POSITIVE_REGULATION_OF_ACTIN_FILAMENT_BUNDLE_ASSEMBLY	GO_POSITIVE_REGULATION_OF_ACTIN_FILAMENT_BUNDLE_ASSEMBLY		28	-0.376978	-1.11707	0.28145	0.432475	1	877	tags=14%, list=8%, signal=15%
GO_RESPONSE_TO_BMP	GO_RESPONSE_TO_BMP		35	-0.360544	-1.11707	0.298283	0.43216	1	1079	tags=14%, list=9%, signal=16%
GO_REPRODUCTIVE_SYSTEM_DEVELOPMENT	GO_REPRODUCTIVE_SYSTEM_DEVELOPMENT		213	-0.264831	-1.11696	0.173246	0.432074	1	1954	tags=22%, list=17%, signal=26%
GO_MITOGEN_ACTIVATED_PROTEIN_KINASE_BINDING	GO_MITOGEN_ACTIVATED_PROTEIN_KINASE_BINDING		16	-0.432848	-1.11672	0.300221	0.432286	1	1926	tags=25%, list=17%, signal=30%
GO_CELLULAR_IRON_ION_HOMEOSTASIS	GO_CELLULAR_IRON_ION_HOMEOSTASIS		21	-0.399755	-1.11618	0.297521	0.433136	1	1370	tags=24%, list=12%, signal=27%
GO_CELLULAR_RESPONSE_TO_MECHANICAL_STIMULUS	GO_CELLULAR_RESPONSE_TO_MECHANICAL_STIMULUS		55	-0.323277	-1.11581	0.260116	0.433638	1	1307	tags=15%, list=11%, signal=16%
GO_TRANSCRIPTION_FACTOR_ACTIVITY_RNA_POLYMERASE_II_DISTAL_ENHANCER_SEQUENCE_SPECIFIC_BINDING	GO_TRANSCRIPTION_FACTOR_ACTIVITY_RNA_POLYMERASE_II_DISTAL_ENHANCER_SEQUENCE_SPECIFIC_BINDING		51	-0.332236	-1.11581	0.242545	0.43332	1	2081	tags=29%, list=18%, signal=36%
GO_CELLULAR_RESPONSE_TO_INSULIN_STIMULUS	GO_CELLULAR_RESPONSE_TO_INSULIN_STIMULUS		102	-0.296672	-1.1152	0.229759	0.434343	1	2309	tags=26%, list=20%, signal=33%
GO_POSITIVE_REGULATION_OF_TRANSLATIONAL_INITIATION	GO_POSITIVE_REGULATION_OF_TRANSLATIONAL_INITIATION		18	-0.426018	-1.1148	0.306034	0.434844	1	25	tags=11%, list=0%, signal=11%
GO_DIGESTION	GO_DIGESTION		41	-0.349016	-1.1147	0.265823	0.434731	1	1985	tags=24%, list=17%, signal=29%
GO_CELLULAR_CARBOHYDRATE_CATABOLIC_PROCESS	GO_CELLULAR_CARBOHYDRATE_CATABOLIC_PROCESS		23	-0.395371	-1.1138	0.302605	0.436284	1	2292	tags=39%, list=20%, signal=49%
GO_INSULIN_SECRETION	GO_INSULIN_SECRETION		16	-0.434924	-1.11334	0.313253	0.436932	1	3496	tags=56%, list=30%, signal=80%
GO_OXIDOREDUCTASE_ACTIVITY_ACTING_ON_A_SULFUR_GROUP_OF_DONORS	GO_OXIDOREDUCTASE_ACTIVITY_ACTING_ON_A_SULFUR_GROUP_OF_DONORS		37	-0.356233	-1.1126	0.286325	0.438168	1	1508	tags=22%, list=13%, signal=25%
GO_VERY_LONG_CHAIN_FATTY_ACID_METABOLIC_PROCESS	GO_VERY_LONG_CHAIN_FATTY_ACID_METABOLIC_PROCESS		17	-0.416957	-1.11247	0.324619	0.438133	1	1559	tags=24%, list=13%, signal=27%
GO_ENDOMEMBRANE_SYSTEM_ORGANIZATION	GO_ENDOMEMBRANE_SYSTEM_ORGANIZATION		349	-0.251146	-1.11244	0.152577	0.437884	1	1830	tags=19%, list=16%, signal=21%
GO_PHOSPHATASE_BINDING	GO_PHOSPHATASE_BINDING		125	-0.283352	-1.11241	0.25523	0.437634	1	1393	tags=17%, list=12%, signal=19%
GO_NEUROLOGICAL_SYSTEM_PROCESS	GO_NEUROLOGICAL_SYSTEM_PROCESS		332	-0.252357	-1.11221	0.157113	0.437748	1	1985	tags=21%, list=17%, signal=24%
GO_APOPTOTIC_MITOCHONDRIAL_CHANGES	GO_APOPTOTIC_MITOCHONDRIAL_CHANGES		49	-0.330554	-1.11146	0.259023	0.438999	1	1002	tags=16%, list=9%, signal=18%
GO_REGULATION_OF_FIBROBLAST_PROLIFERATION	GO_REGULATION_OF_FIBROBLAST_PROLIFERATION		52	-0.326308	-1.11146	0.293033	0.438689	1	2257	tags=31%, list=19%, signal=38%
GO_ACTIVATION_OF_PROTEIN_KINASE_ACTIVITY	GO_ACTIVATION_OF_PROTEIN_KINASE_ACTIVITY		183	-0.26861	-1.11101	0.200873	0.439297	1	1372	tags=14%, list=12%, signal=16%
GO_CARBOHYDRATE_BINDING	GO_CARBOHYDRATE_BINDING		126	-0.287452	-1.11082	0.25054	0.439375	1	1824	tags=22%, list=16%, signal=26%
GO_POSITIVE_REGULATION_OF_PROTEIN_CATABOLIC_PROCESS	GO_POSITIVE_REGULATION_OF_PROTEIN_CATABOLIC_PROCESS		208	-0.265716	-1.11028	0.213483	0.440178	1	1273	tags=13%, list=11%, signal=14%
GO_BONE_MORPHOGENESIS	GO_BONE_MORPHOGENESIS		37	-0.354748	-1.11025	0.298165	0.439916	1	1488	tags=22%, list=13%, signal=25%
GO_ACTIN_FILAMENT_ORGANIZATION	GO_ACTIN_FILAMENT_ORGANIZATION		116	-0.287118	-1.11022	0.229979	0.439672	1	2436	tags=29%, list=21%, signal=37%
GO_POSITIVE_REGULATION_OF_DENDRITE_MORPHOGENESIS	GO_POSITIVE_REGULATION_OF_DENDRITE_MORPHOGENESIS		19	-0.410179	-1.10978	0.316594	0.440269	1	55	tags=5%, list=0%, signal=5%
GO_INSULIN_RECEPTOR_SIGNALING_PATHWAY	GO_INSULIN_RECEPTOR_SIGNALING_PATHWAY		57	-0.321848	-1.10969	0.262055	0.440132	1	2444	tags=28%, list=21%, signal=35%
GO_REGULATION_OF_PHOSPHOPROTEIN_PHOSPHATASE_ACTIVITY	GO_REGULATION_OF_PHOSPHOPROTEIN_PHOSPHATASE_ACTIVITY		47	-0.335106	-1.10952	0.290043	0.440188	1	2356	tags=30%, list=20%, signal=37%
GO_POSITIVE_REGULATION_OF_STRIATED_MUSCLE_CELL_DIFFERENTIATION	GO_POSITIVE_REGULATION_OF_STRIATED_MUSCLE_CELL_DIFFERENTIATION		26	-0.382832	-1.10865	0.299127	0.441724	1	256	tags=12%, list=2%, signal=12%
GO_LONG_TERM_SYNAPTIC_POTENTIATION	GO_LONG_TERM_SYNAPTIC_POTENTIATION		17	-0.429417	-1.10852	0.352201	0.4417	1	2764	tags=47%, list=24%, signal=62%
GO_NEGATIVE_REGULATION_OF_COAGULATION	GO_NEGATIVE_REGULATION_OF_COAGULATION		16	-0.422799	-1.10845	0.304082	0.441528	1	1095	tags=25%, list=9%, signal=28%
GO_POSITIVE_REGULATION_OF_EXOCYTOSIS	GO_POSITIVE_REGULATION_OF_EXOCYTOSIS		49	-0.332585	-1.10809	0.282158	0.441965	1	1180	tags=14%, list=10%, signal=16%
GO_ENDOCRINE_PANCREAS_DEVELOPMENT	GO_ENDOCRINE_PANCREAS_DEVELOPMENT		21	-0.400272	-1.10738	0.299376	0.44316	1	1860	tags=33%, list=16%, signal=40%
GO_POSITIVE_REGULATION_OF_ANION_TRANSPORT	GO_POSITIVE_REGULATION_OF_ANION_TRANSPORT		30	-0.361408	-1.10662	0.292	0.444448	1	1448	tags=23%, list=13%, signal=27%
GO_AUTOPHAGOSOME	GO_AUTOPHAGOSOME		66	-0.310288	-1.10642	0.275862	0.444514	1	3059	tags=39%, list=26%, signal=53%
GO_NEGATIVE_REGULATION_OF_NF_KAPPAB_TRANSCRIPTION_FACTOR_ACTIVITY	GO_NEGATIVE_REGULATION_OF_NF_KAPPAB_TRANSCRIPTION_FACTOR_ACTIVITY		50	-0.333762	-1.10585	0.277652	0.445444	1	1349	tags=24%, list=12%, signal=27%
GO_POSITIVE_REGULATION_OF_TRANSFERASE_ACTIVITY	GO_POSITIVE_REGULATION_OF_TRANSFERASE_ACTIVITY		428	-0.244108	-1.10539	0.16886	0.446176	1	1372	tags=14%, list=12%, signal=15%
GO_AMMONIUM_ION_METABOLIC_PROCESS	GO_AMMONIUM_ION_METABOLIC_PROCESS		89	-0.297856	-1.10486	0.271762	0.446957	1	396	tags=10%, list=3%, signal=10%
GO_SPROUTING_ANGIOGENESIS	GO_SPROUTING_ANGIOGENESIS		23	-0.397177	-1.1045	0.338496	0.447424	1	1892	tags=39%, list=16%, signal=47%
GO_PROTEIN_DEPHOSPHORYLATION	GO_PROTEIN_DEPHOSPHORYLATION		145	-0.278308	-1.10448	0.242915	0.447149	1	2061	tags=22%, list=18%, signal=27%
GO_CELLULAR_RESPONSE_TO_STARVATION	GO_CELLULAR_RESPONSE_TO_STARVATION		85	-0.30171	-1.10426	0.286026	0.447298	1	2074	tags=26%, list=18%, signal=31%
GO_NERVE_DEVELOPMENT	GO_NERVE_DEVELOPMENT		25	-0.376434	-1.10425	0.297468	0.447007	1	3172	tags=52%, list=27%, signal=71%
GO_POST_EMBRYONIC_DEVELOPMENT	GO_POST_EMBRYONIC_DEVELOPMENT		54	-0.32701	-1.10347	0.289474	0.448427	1	1601	tags=22%, list=14%, signal=26%
GO_REGULATION_OF_MEMBRANE_POTENTIAL	GO_REGULATION_OF_MEMBRANE_POTENTIAL		152	-0.273969	-1.10323	0.233546	0.448611	1	2193	tags=22%, list=19%, signal=27%
GO_STRESS_ACTIVATED_PROTEIN_KINASE_SIGNALING_CASCADE	GO_STRESS_ACTIVATED_PROTEIN_KINASE_SIGNALING_CASCADE		81	-0.299665	-1.10294	0.272926	0.448904	1	1265	tags=17%, list=11%, signal=19%
GO_CARBOHYDRATE_PHOSPHORYLATION	GO_CARBOHYDRATE_PHOSPHORYLATION		15	-0.432192	-1.10281	0.322449	0.448851	1	477	tags=20%, list=4%, signal=21%
GO_RESPONSE_TO_RADIATION	GO_RESPONSE_TO_RADIATION		270	-0.257753	-1.10239	0.173626	0.449377	1	1002	tags=12%, list=9%, signal=13%
GO_REGULATION_OF_MUSCLE_HYPERTROPHY	GO_REGULATION_OF_MUSCLE_HYPERTROPHY		27	-0.380168	-1.10208	0.337474	0.449729	1	1261	tags=22%, list=11%, signal=25%
GO_STRUCTURAL_CONSTITUENT_OF_CYTOSKELETON	GO_STRUCTURAL_CONSTITUENT_OF_CYTOSKELETON		57	-0.319385	-1.1019	0.265469	0.449791	1	605	tags=9%, list=5%, signal=9%
GO_POSITIVE_REGULATION_OF_NIK_NF_KAPPAB_SIGNALING	GO_POSITIVE_REGULATION_OF_NIK_NF_KAPPAB_SIGNALING		24	-0.386641	-1.10153	0.291221	0.450295	1	767	tags=17%, list=7%, signal=18%
GO_REGULATION_OF_PROTEIN_STABILITY	GO_REGULATION_OF_PROTEIN_STABILITY		168	-0.268357	-1.10131	0.233645	0.450437	1	1559	tags=19%, list=13%, signal=22%
GO_NEGATIVE_REGULATION_OF_NUCLEOCYTOPLASMIC_TRANSPORT	GO_NEGATIVE_REGULATION_OF_NUCLEOCYTOPLASMIC_TRANSPORT		52	-0.320534	-1.10089	0.287968	0.45105	1	1188	tags=17%, list=10%, signal=19%
GO_APICAL_PLASMA_MEMBRANE	GO_APICAL_PLASMA_MEMBRANE		130	-0.278217	-1.10038	0.229437	0.45188	1	2299	tags=28%, list=20%, signal=34%
GO_ION_CHANNEL_BINDING	GO_ION_CHANNEL_BINDING		62	-0.313974	-1.09915	0.260674	0.454177	1	485	tags=10%, list=4%, signal=10%
GO_REGULATION_OF_DNA_BINDING	GO_REGULATION_OF_DNA_BINDING		71	-0.308345	-1.09895	0.278243	0.45428	1	1870	tags=24%, list=16%, signal=28%
GO_POSITIVE_REGULATION_OF_MUSCLE_HYPERTROPHY	GO_POSITIVE_REGULATION_OF_MUSCLE_HYPERTROPHY		17	-0.417431	-1.09725	0.309829	0.457596	1	245	tags=12%, list=2%, signal=12%
GO_MACROMOLECULE_TRANSMEMBRANE_TRANSPORTER_ACTIVITY	GO_MACROMOLECULE_TRANSMEMBRANE_TRANSPORTER_ACTIVITY		16	-0.429572	-1.09717	0.345603	0.457455	1	574	tags=19%, list=5%, signal=20%
GO_SINGLE_ORGANISM_BEHAVIOR	GO_SINGLE_ORGANISM_BEHAVIOR		186	-0.264001	-1.09695	0.216814	0.45759	1	1545	tags=18%, list=13%, signal=21%
GO_NEGATIVE_REGULATION_OF_FIBROBLAST_PROLIFERATION	GO_NEGATIVE_REGULATION_OF_FIBROBLAST_PROLIFERATION		20	-0.403678	-1.0968	0.327083	0.457569	1	2257	tags=35%, list=19%, signal=43%
GO_CELL_FATE_COMMITMENT	GO_CELL_FATE_COMMITMENT		81	-0.301441	-1.09663	0.275556	0.457608	1	1290	tags=17%, list=11%, signal=19%
GO_CELL_MORPHOGENESIS_INVOLVED_IN_DIFFERENTIATION	GO_CELL_MORPHOGENESIS_INVOLVED_IN_DIFFERENTIATION		229	-0.257886	-1.09628	0.210046	0.458076	1	2418	tags=25%, list=21%, signal=31%
GO_POSITIVE_REGULATION_OF_STEM_CELL_PROLIFERATION	GO_POSITIVE_REGULATION_OF_STEM_CELL_PROLIFERATION		32	-0.357681	-1.0954	0.323353	0.4597	1	2257	tags=34%, list=19%, signal=43%
GO_CELL_CELL_JUNCTION	GO_CELL_CELL_JUNCTION		198	-0.263733	-1.09489	0.218143	0.460539	1	2350	tags=29%, list=20%, signal=36%
GO_RESPONSE_TO_IONIZING_RADIATION	GO_RESPONSE_TO_IONIZING_RADIATION		116	-0.285691	-1.09425	0.271047	0.461593	1	2148	tags=25%, list=19%, signal=30%
GO_ANCHORING_JUNCTION	GO_ANCHORING_JUNCTION		357	-0.247044	-1.09399	0.231278	0.461812	1	2161	tags=22%, list=19%, signal=26%
GO_NEGATIVE_REGULATION_OF_PROTEIN_POLYMERIZATION	GO_NEGATIVE_REGULATION_OF_PROTEIN_POLYMERIZATION		36	-0.345179	-1.09298	0.312766	0.463728	1	1679	tags=28%, list=15%, signal=32%
GO_ORGANOPHOSPHATE_CATABOLIC_PROCESS	GO_ORGANOPHOSPHATE_CATABOLIC_PROCESS		77	-0.298637	-1.09184	0.288747	0.465906	1	1595	tags=19%, list=14%, signal=22%
GO_PROTEIN_AUTOPHOSPHORYLATION	GO_PROTEIN_AUTOPHOSPHORYLATION		134	-0.28132	-1.09182	0.252083	0.465639	1	3194	tags=36%, list=28%, signal=49%
GO_REGULATION_OF_NEUTROPHIL_MIGRATION	GO_REGULATION_OF_NEUTROPHIL_MIGRATION		18	-0.407754	-1.09142	0.322515	0.466201	1	2045	tags=22%, list=18%, signal=27%
GO_NEGATIVE_REGULATION_OF_HEMOPOIESIS	GO_NEGATIVE_REGULATION_OF_HEMOPOIESIS		80	-0.302275	-1.09142	0.26501	0.465882	1	677	tags=14%, list=6%, signal=15%
GO_LIPOSACCHARIDE_METABOLIC_PROCESS	GO_LIPOSACCHARIDE_METABOLIC_PROCESS		79	-0.299015	-1.09134	0.274468	0.465733	1	2640	tags=35%, list=23%, signal=46%
GO_HEMOSTASIS	GO_HEMOSTASIS		187	-0.264222	-1.09094	0.252336	0.466237	1	2080	tags=26%, list=18%, signal=31%
GO_MONOCARBOXYLIC_ACID_METABOLIC_PROCESS	GO_MONOCARBOXYLIC_ACID_METABOLIC_PROCESS		290	-0.252534	-1.09093	0.213942	0.465931	1	2136	tags=24%, list=18%, signal=28%
GO_VENTRICULAR_SEPTUM_DEVELOPMENT	GO_VENTRICULAR_SEPTUM_DEVELOPMENT		32	-0.357694	-1.09075	0.329087	0.465998	1	3018	tags=34%, list=26%, signal=46%
GO_NEGATIVE_REGULATION_OF_LYMPHOCYTE_DIFFERENTIATION	GO_NEGATIVE_REGULATION_OF_LYMPHOCYTE_DIFFERENTIATION		20	-0.402179	-1.09067	0.361419	0.465862	1	296	tags=10%, list=3%, signal=10%
GO_CYTOPLASMIC_REGION	GO_CYTOPLASMIC_REGION		178	-0.264208	-1.09053	0.257081	0.46586	1	1999	tags=24%, list=17%, signal=28%
GO_PYRIDOXAL_PHOSPHATE_BINDING	GO_PYRIDOXAL_PHOSPHATE_BINDING		30	-0.36638	-1.08951	0.322314	0.467734	1	396	tags=13%, list=3%, signal=14%
GO_CELLULAR_RESPONSE_TO_HEAT	GO_CELLULAR_RESPONSE_TO_HEAT		20	-0.399381	-1.08917	0.358871	0.468166	1	1532	tags=25%, list=13%, signal=29%
GO_POSITIVE_REGULATION_OF_PROTEOLYSIS	GO_POSITIVE_REGULATION_OF_PROTEOLYSIS		280	-0.252448	-1.08916	0.208145	0.46787	1	1349	tags=14%, list=12%, signal=15%
GO_PROTEIN_PHOSPHATASE_BINDING	GO_PROTEIN_PHOSPHATASE_BINDING		94	-0.291704	-1.08915	0.26694	0.467556	1	1393	tags=17%, list=12%, signal=19%
GO_DEVELOPMENTAL_CELL_GROWTH	GO_DEVELOPMENTAL_CELL_GROWTH		40	-0.342311	-1.08901	0.321814	0.467516	1	3111	tags=43%, list=27%, signal=58%
GO_EPHRIN_RECEPTOR_SIGNALING_PATHWAY	GO_EPHRIN_RECEPTOR_SIGNALING_PATHWAY		55	-0.3249	-1.08885	0.313978	0.467558	1	2487	tags=33%, list=21%, signal=41%
GO_POSITIVE_REGULATION_OF_LYASE_ACTIVITY	GO_POSITIVE_REGULATION_OF_LYASE_ACTIVITY		22	-0.38644	-1.08533	0.341847	0.475018	1	68	tags=5%, list=1%, signal=5%
GO_ARTERY_MORPHOGENESIS	GO_ARTERY_MORPHOGENESIS		23	-0.389276	-1.08526	0.344969	0.47483	1	1601	tags=30%, list=14%, signal=35%
GO_REGULATION_OF_ADHERENS_JUNCTION_ORGANIZATION	GO_REGULATION_OF_ADHERENS_JUNCTION_ORGANIZATION		29	-0.362003	-1.08466	0.311065	0.4758	1	2225	tags=31%, list=19%, signal=38%
GO_REGULATION_OF_SYNAPTIC_PLASTICITY	GO_REGULATION_OF_SYNAPTIC_PLASTICITY		64	-0.306746	-1.08459	0.313525	0.475642	1	2137	tags=27%, list=18%, signal=32%
GO_LIPID_CATABOLIC_PROCESS	GO_LIPID_CATABOLIC_PROCESS		138	-0.275514	-1.08429	0.271186	0.475988	1	2237	tags=24%, list=19%, signal=29%
GO_EXECUTION_PHASE_OF_APOPTOSIS	GO_EXECUTION_PHASE_OF_APOPTOSIS		40	-0.336528	-1.08402	0.311828	0.476261	1	1740	tags=23%, list=15%, signal=26%
GO_NEGATIVE_REGULATION_OF_RESPONSE_TO_OXIDATIVE_STRESS	GO_NEGATIVE_REGULATION_OF_RESPONSE_TO_OXIDATIVE_STRESS		24	-0.381209	-1.08381	0.32967	0.47642	1	1105	tags=17%, list=10%, signal=18%
GO_HYDROLASE_ACTIVITY_ACTING_ON_GLYCOSYL_BONDS	GO_HYDROLASE_ACTIVITY_ACTING_ON_GLYCOSYL_BONDS		78	-0.295471	-1.0836	0.305376	0.476596	1	2391	tags=29%, list=21%, signal=37%
GO_RESPONSE_TO_GONADOTROPIN	GO_RESPONSE_TO_GONADOTROPIN		15	-0.415448	-1.08353	0.37395	0.476409	1	346	tags=20%, list=3%, signal=21%
GO_TRANSCRIPTION_FACTOR_ACTIVITY_DIRECT_LIGAND_REGULATED_SEQUENCE_SPECIFIC_DNA_BINDING	GO_TRANSCRIPTION_FACTOR_ACTIVITY_DIRECT_LIGAND_REGULATED_SEQUENCE_SPECIFIC_DNA_BINDING		23	-0.374127	-1.0832	0.323771	0.476797	1	316	tags=13%, list=3%, signal=13%
GO_REGULATION_OF_TRANSCRIPTION_FROM_RNA_POLYMERASE_II_PROMOTER_IN_RESPONSE_TO_HYPOXIA	GO_REGULATION_OF_TRANSCRIPTION_FROM_RNA_POLYMERASE_II_PROMOTER_IN_RESPONSE_TO_HYPOXIA		27	-0.363501	-1.08318	0.335541	0.476519	1	1754	tags=22%, list=15%, signal=26%
GO_REGULATION_OF_GRANULOCYTE_CHEMOTAXIS	GO_REGULATION_OF_GRANULOCYTE_CHEMOTAXIS		20	-0.390107	-1.08271	0.346983	0.477216	1	2045	tags=30%, list=18%, signal=36%
GO_NEGATIVE_REGULATION_OF_RESPONSE_TO_WOUNDING	GO_NEGATIVE_REGULATION_OF_RESPONSE_TO_WOUNDING		73	-0.296902	-1.08242	0.286869	0.477529	1	1483	tags=19%, list=13%, signal=22%
GO_SECRETORY_GRANULE_LUMEN	GO_SECRETORY_GRANULE_LUMEN		28	-0.361233	-1.08222	0.338843	0.477632	1	888	tags=18%, list=8%, signal=19%
GO_CELL_SUBSTRATE_JUNCTION_ASSEMBLY	GO_CELL_SUBSTRATE_JUNCTION_ASSEMBLY		23	-0.382035	-1.08198	0.347639	0.477838	1	3311	tags=48%, list=29%, signal=67%
GO_CELL_CYCLE_ARREST	GO_CELL_CYCLE_ARREST		110	-0.282789	-1.08172	0.296681	0.478093	1	348	tags=7%, list=3%, signal=7%
GO_T_HELPER_1_TYPE_IMMUNE_RESPONSE	GO_T_HELPER_1_TYPE_IMMUNE_RESPONSE		18	-0.403822	-1.08171	0.338809	0.477791	1	811	tags=28%, list=7%, signal=30%
GO_CORECEPTOR_ACTIVITY	GO_CORECEPTOR_ACTIVITY		18	-0.408093	-1.08148	0.342629	0.477942	1	832	tags=22%, list=7%, signal=24%
GO_PHOSPHOLIPID_METABOLIC_PROCESS	GO_PHOSPHOLIPID_METABOLIC_PROCESS		249	-0.253315	-1.08061	0.222944	0.479601	1	2279	tags=24%, list=20%, signal=29%
GO_REGULATION_OF_CARTILAGE_DEVELOPMENT	GO_REGULATION_OF_CARTILAGE_DEVELOPMENT		20	-0.395774	-1.08053	0.362851	0.479467	1	2131	tags=30%, list=18%, signal=37%
GO_ION_TRANSMEMBRANE_TRANSPORT	GO_ION_TRANSMEMBRANE_TRANSPORT		368	-0.242749	-1.08049	0.22479	0.479205	1	1228	tags=14%, list=11%, signal=15%
GO_MOLTING_CYCLE	GO_MOLTING_CYCLE		37	-0.351181	-1.08032	0.35546	0.47925	1	1532	tags=19%, list=13%, signal=22%
GO_RENAL_WATER_HOMEOSTASIS	GO_RENAL_WATER_HOMEOSTASIS		15	-0.423329	-1.07989	0.353945	0.479864	1	1289	tags=13%, list=11%, signal=15%
GO_FATTY_ACID_METABOLIC_PROCESS	GO_FATTY_ACID_METABOLIC_PROCESS		176	-0.263022	-1.07977	0.251037	0.4798	1	2136	tags=24%, list=18%, signal=30%
GO_INOSITOL_LIPID_MEDIATED_SIGNALING	GO_INOSITOL_LIPID_MEDIATED_SIGNALING		68	-0.303884	-1.07949	0.306122	0.480118	1	1910	tags=24%, list=16%, signal=28%
GO_ACUTE_INFLAMMATORY_RESPONSE	GO_ACUTE_INFLAMMATORY_RESPONSE		28	-0.371374	-1.07938	0.323829	0.480024	1	2164	tags=36%, list=19%, signal=44%
GO_LYSINE_ACETYLATED_HISTONE_BINDING	GO_LYSINE_ACETYLATED_HISTONE_BINDING		15	-0.431465	-1.07864	0.368421	0.481258	1	4507	tags=67%, list=39%, signal=109%
GO_IMMUNOGLOBULIN_PRODUCTION	GO_IMMUNOGLOBULIN_PRODUCTION		40	-0.337939	-1.0786	0.344398	0.481017	1	885	tags=18%, list=8%, signal=19%
GO_ERYTHROCYTE_HOMEOSTASIS	GO_ERYTHROCYTE_HOMEOSTASIS		53	-0.320598	-1.07835	0.315464	0.481241	1	1601	tags=21%, list=14%, signal=24%
GO_NEGATIVE_REGULATION_OF_ERBB_SIGNALING_PATHWAY	GO_NEGATIVE_REGULATION_OF_ERBB_SIGNALING_PATHWAY		36	-0.340556	-1.07774	0.327766	0.482262	1	2196	tags=33%, list=19%, signal=41%
GO_PERIPHERAL_NERVOUS_SYSTEM_DEVELOPMENT	GO_PERIPHERAL_NERVOUS_SYSTEM_DEVELOPMENT		35	-0.350876	-1.07671	0.343882	0.484227	1	1392	tags=20%, list=12%, signal=23%
GO_LYMPHOCYTE_ACTIVATION_INVOLVED_IN_IMMUNE_RESPONSE	GO_LYMPHOCYTE_ACTIVATION_INVOLVED_IN_IMMUNE_RESPONSE		68	-0.302774	-1.07637	0.315151	0.484607	1	1016	tags=18%, list=9%, signal=19%
GO_OXIDOREDUCTASE_ACTIVITY_ACTING_ON_THE_CH_CH_GROUP_OF_DONORS_NAD_OR_NADP_AS_ACCEPTOR	GO_OXIDOREDUCTASE_ACTIVITY_ACTING_ON_THE_CH_CH_GROUP_OF_DONORS_NAD_OR_NADP_AS_ACCEPTOR		16	-0.42076	-1.07608	0.376569	0.484909	1	2052	tags=31%, list=18%, signal=38%
GO_SOMITOGENESIS	GO_SOMITOGENESIS		32	-0.352387	-1.07546	0.343882	0.485924	1	1857	tags=41%, list=16%, signal=48%
GO_REGULATION_OF_RECEPTOR_MEDIATED_ENDOCYTOSIS	GO_REGULATION_OF_RECEPTOR_MEDIATED_ENDOCYTOSIS		45	-0.325224	-1.07514	0.346693	0.48629	1	1088	tags=20%, list=9%, signal=22%
GO_NUCLEAR_TRANSCRIBED_MRNA_POLY_A_TAIL_SHORTENING	GO_NUCLEAR_TRANSCRIBED_MRNA_POLY_A_TAIL_SHORTENING		22	-0.384254	-1.07469	0.352577	0.486992	1	406	tags=9%, list=4%, signal=9%
GO_POSITIVE_REGULATION_OF_T_HELPER_CELL_DIFFERENTIATION	GO_POSITIVE_REGULATION_OF_T_HELPER_CELL_DIFFERENTIATION		15	-0.419252	-1.07441	0.359307	0.487284	1	2369	tags=40%, list=20%, signal=50%
GO_ENDOCRINE_SYSTEM_DEVELOPMENT	GO_ENDOCRINE_SYSTEM_DEVELOPMENT		55	-0.312179	-1.07436	0.326271	0.487062	1	1977	tags=27%, list=17%, signal=33%
GO_GOLGI_TO_PLASMA_MEMBRANE_PROTEIN_TRANSPORT	GO_GOLGI_TO_PLASMA_MEMBRANE_PROTEIN_TRANSPORT		20	-0.392866	-1.07422	0.37155	0.487026	1	2038	tags=30%, list=18%, signal=36%
GO_REGULATION_OF_CELLULAR_RESPONSE_TO_TRANSFORMING_GROWTH_FACTOR_BETA_STIMULUS	GO_REGULATION_OF_CELLULAR_RESPONSE_TO_TRANSFORMING_GROWTH_FACTOR_BETA_STIMULUS		60	-0.311061	-1.07376	0.316872	0.487721	1	2935	tags=37%, list=25%, signal=49%
GO_REGULATION_OF_ANATOMICAL_STRUCTURE_SIZE	GO_REGULATION_OF_ANATOMICAL_STRUCTURE_SIZE		261	-0.250817	-1.07319	0.237581	0.48867	1	2400	tags=26%, list=21%, signal=32%
GO_REGULATION_OF_STRIATED_MUSCLE_CELL_DIFFERENTIATION	GO_REGULATION_OF_STRIATED_MUSCLE_CELL_DIFFERENTIATION		47	-0.325365	-1.07297	0.351129	0.488805	1	366	tags=11%, list=3%, signal=11%
GO_CARBOHYDRATE_DERIVATIVE_TRANSPORTER_ACTIVITY	GO_CARBOHYDRATE_DERIVATIVE_TRANSPORTER_ACTIVITY		28	-0.358025	-1.0727	0.342975	0.489106	1	2766	tags=36%, list=24%, signal=47%
GO_PHAGOSOME_MATURATION	GO_PHAGOSOME_MATURATION		28	-0.366417	-1.07261	0.359184	0.48895	1	2444	tags=29%, list=21%, signal=36%
GO_GOLGI_ASSOCIATED_VESICLE_MEMBRANE	GO_GOLGI_ASSOCIATED_VESICLE_MEMBRANE		38	-0.339699	-1.07236	0.331276	0.489217	1	1780	tags=26%, list=15%, signal=31%
GO_AEROBIC_RESPIRATION	GO_AEROBIC_RESPIRATION		44	-0.330828	-1.07159	0.336083	0.490661	1	1440	tags=23%, list=12%, signal=26%
GO_IMMUNOGLOBULIN_PRODUCTION_INVOLVED_IN_IMMUNOGLOBULIN_MEDIATED_IMMUNE_RESPONSE	GO_IMMUNOGLOBULIN_PRODUCTION_INVOLVED_IN_IMMUNOGLOBULIN_MEDIATED_IMMUNE_RESPONSE		23	-0.38387	-1.07148	0.359914	0.490592	1	885	tags=22%, list=8%, signal=23%
GO_PROTEIN_DEGLYCOSYLATION	GO_PROTEIN_DEGLYCOSYLATION		20	-0.395501	-1.07092	0.358333	0.491587	1	1330	tags=30%, list=11%, signal=34%
GO_G_PROTEIN_ALPHA_SUBUNIT_BINDING	GO_G_PROTEIN_ALPHA_SUBUNIT_BINDING		16	-0.416402	-1.07028	0.363817	0.492704	1	1048	tags=25%, list=9%, signal=27%
GO_NEPHRON_EPITHELIUM_DEVELOPMENT	GO_NEPHRON_EPITHELIUM_DEVELOPMENT		39	-0.338746	-1.0698	0.359743	0.493463	1	2512	tags=36%, list=22%, signal=46%
GO_ALCOHOL_BIOSYNTHETIC_PROCESS	GO_ALCOHOL_BIOSYNTHETIC_PROCESS		72	-0.299001	-1.06969	0.285106	0.493387	1	1743	tags=24%, list=15%, signal=28%
GO_VESICLE_LUMEN	GO_VESICLE_LUMEN		35	-0.34484	-1.06959	0.335317	0.493265	1	1601	tags=23%, list=14%, signal=26%
GO_MODULATION_OF_TRANSCRIPTION_IN_OTHER_ORGANISM_INVOLVED_IN_SYMBIOTIC_INTERACTION	GO_MODULATION_OF_TRANSCRIPTION_IN_OTHER_ORGANISM_INVOLVED_IN_SYMBIOTIC_INTERACTION		15	-0.419471	-1.06936	0.365751	0.493478	1	878	tags=20%, list=8%, signal=22%
GO_PHOSPHORIC_ESTER_HYDROLASE_ACTIVITY	GO_PHOSPHORIC_ESTER_HYDROLASE_ACTIVITY		236	-0.248912	-1.06915	0.256729	0.493582	1	2061	tags=19%, list=18%, signal=23%
GO_CYTOPLASMIC_PATTERN_RECOGNITION_RECEPTOR_SIGNALING_PATHWAY	GO_CYTOPLASMIC_PATTERN_RECOGNITION_RECEPTOR_SIGNALING_PATHWAY		31	-0.357901	-1.06898	0.356	0.493675	1	388	tags=10%, list=3%, signal=10%
GO_REGULATION_OF_DEPHOSPHORYLATION	GO_REGULATION_OF_DEPHOSPHORYLATION		106	-0.279737	-1.06824	0.314655	0.495021	1	1599	tags=17%, list=14%, signal=20%
GO_CORONARY_VASCULATURE_DEVELOPMENT	GO_CORONARY_VASCULATURE_DEVELOPMENT		22	-0.383227	-1.06823	0.363636	0.494695	1	1722	tags=23%, list=15%, signal=27%
GO_NEGATIVE_REGULATION_OF_SYNAPTIC_TRANSMISSION	GO_NEGATIVE_REGULATION_OF_SYNAPTIC_TRANSMISSION		30	-0.356725	-1.06777	0.358333	0.495419	1	1365	tags=27%, list=12%, signal=30%
GO_INORGANIC_CATION_TRANSMEMBRANE_TRANSPORTER_ACTIVITY	GO_INORGANIC_CATION_TRANSMEMBRANE_TRANSPORTER_ACTIVITY		228	-0.25071	-1.06752	0.255914	0.495683	1	2446	tags=26%, list=21%, signal=32%
GO_NEGATIVE_REGULATION_OF_HYDROLASE_ACTIVITY	GO_NEGATIVE_REGULATION_OF_HYDROLASE_ACTIVITY		206	-0.25455	-1.06673	0.287815	0.49713	1	1821	tags=18%, list=16%, signal=21%
GO_REGULATION_OF_PHOSPHOLIPASE_ACTIVITY	GO_REGULATION_OF_PHOSPHOLIPASE_ACTIVITY		29	-0.351548	-1.06636	0.344262	0.497622	1	1222	tags=31%, list=11%, signal=35%
GO_GLIAL_CELL_MIGRATION	GO_GLIAL_CELL_MIGRATION		16	-0.407482	-1.06616	0.38193	0.49774	1	3111	tags=44%, list=27%, signal=60%
GO_ACTIN_BASED_CELL_PROJECTION	GO_ACTIN_BASED_CELL_PROJECTION		92	-0.283646	-1.06579	0.310722	0.498219	1	2444	tags=27%, list=21%, signal=34%
GO_PCG_PROTEIN_COMPLEX	GO_PCG_PROTEIN_COMPLEX		40	-0.327264	-1.06576	0.3361	0.497958	1	2607	tags=30%, list=23%, signal=39%
GO_AMINO_SUGAR_METABOLIC_PROCESS	GO_AMINO_SUGAR_METABOLIC_PROCESS		29	-0.35867	-1.06506	0.357564	0.499199	1	1311	tags=28%, list=11%, signal=31%
GO_GLUCOSE_METABOLIC_PROCESS	GO_GLUCOSE_METABOLIC_PROCESS		79	-0.287534	-1.06362	0.325532	0.502174	1	2292	tags=32%, list=20%, signal=39%
GO_PERIKARYON	GO_PERIKARYON		41	-0.329419	-1.06347	0.358696	0.502149	1	3180	tags=39%, list=27%, signal=54%
GO_REGULATION_OF_ISOTYPE_SWITCHING	GO_REGULATION_OF_ISOTYPE_SWITCHING		18	-0.396696	-1.06346	0.380368	0.501843	1	760	tags=17%, list=7%, signal=18%
GO_CORTICAL_ACTIN_CYTOSKELETON	GO_CORTICAL_ACTIN_CYTOSKELETON		35	-0.338729	-1.06303	0.348454	0.502455	1	1049	tags=17%, list=9%, signal=19%
GO_MHC_PROTEIN_COMPLEX_BINDING	GO_MHC_PROTEIN_COMPLEX_BINDING		15	-0.415949	-1.06301	0.374494	0.502148	1	2290	tags=40%, list=20%, signal=50%
GO_CYCLIN_DEPENDENT_PROTEIN_SERINE_THREONINE_KINASE_REGULATOR_ACTIVITY	GO_CYCLIN_DEPENDENT_PROTEIN_SERINE_THREONINE_KINASE_REGULATOR_ACTIVITY		25	-0.371727	-1.06252	0.361225	0.502886	1	996	tags=16%, list=9%, signal=17%
GO_PERINUCLEAR_REGION_OF_CYTOPLASM	GO_PERINUCLEAR_REGION_OF_CYTOPLASM		428	-0.236943	-1.06237	0.243534	0.502915	1	1391	tags=15%, list=12%, signal=17%
GO_ESTABLISHMENT_OF_PROTEIN_LOCALIZATION_TO_MEMBRANE	GO_ESTABLISHMENT_OF_PROTEIN_LOCALIZATION_TO_MEMBRANE		228	-0.251206	-1.06222	0.302013	0.5029	1	2161	tags=23%, list=19%, signal=27%
GO_REGULATION_OF_G_PROTEIN_COUPLED_RECEPTOR_PROTEIN_SIGNALING_PATHWAY	GO_REGULATION_OF_G_PROTEIN_COUPLED_RECEPTOR_PROTEIN_SIGNALING_PATHWAY		64	-0.302207	-1.06167	0.350951	0.503796	1	1642	tags=22%, list=14%, signal=25%
GO_POSITIVE_REGULATION_OF_PROTEIN_COMPLEX_ASSEMBLY	GO_POSITIVE_REGULATION_OF_PROTEIN_COMPLEX_ASSEMBLY		140	-0.267978	-1.06136	0.308534	0.504149	1	2211	tags=24%, list=19%, signal=29%
GO_ENERGY_DERIVATION_BY_OXIDATION_OF_ORGANIC_COMPOUNDS	GO_ENERGY_DERIVATION_BY_OXIDATION_OF_ORGANIC_COMPOUNDS		165	-0.262131	-1.06068	0.307203	0.505434	1	2292	tags=27%, list=20%, signal=33%
GO_CELL_PROJECTION_ORGANIZATION	GO_CELL_PROJECTION_ORGANIZATION		487	-0.232298	-1.06023	0.247685	0.506158	1	2428	tags=25%, list=21%, signal=30%
GO_INOSITOL_PHOSPHATE_METABOLIC_PROCESS	GO_INOSITOL_PHOSPHATE_METABOLIC_PROCESS		41	-0.331052	-1.0601	0.371308	0.506118	1	2168	tags=27%, list=19%, signal=33%
GO_PHOSPHOLIPID_BINDING	GO_PHOSPHOLIPID_BINDING		221	-0.250813	-1.05971	0.288503	0.506646	1	2640	tags=29%, list=23%, signal=37%
GO_SPINAL_CORD_DEVELOPMENT	GO_SPINAL_CORD_DEVELOPMENT		37	-0.334798	-1.05959	0.372671	0.506577	1	1718	tags=24%, list=15%, signal=28%
GO_NEGATIVE_REGULATION_OF_PROTEIN_COMPLEX_ASSEMBLY	GO_NEGATIVE_REGULATION_OF_PROTEIN_COMPLEX_ASSEMBLY		71	-0.293035	-1.05942	0.338395	0.506644	1	1461	tags=21%, list=13%, signal=24%
GO_CATECHOLAMINE_METABOLIC_PROCESS	GO_CATECHOLAMINE_METABOLIC_PROCESS		17	-0.414962	-1.05939	0.377637	0.506371	1	137	tags=12%, list=1%, signal=12%
GO_POSITIVE_REGULATION_OF_TRANSMEMBRANE_TRANSPORT	GO_POSITIVE_REGULATION_OF_TRANSMEMBRANE_TRANSPORT		61	-0.306497	-1.05927	0.325153	0.50634	1	1865	tags=25%, list=16%, signal=29%
GO_DEVELOPMENT_OF_PRIMARY_SEXUAL_CHARACTERISTICS	GO_DEVELOPMENT_OF_PRIMARY_SEXUAL_CHARACTERISTICS		106	-0.271839	-1.05906	0.317125	0.506497	1	1954	tags=23%, list=17%, signal=27%
GO_SECRETORY_GRANULE_ORGANIZATION	GO_SECRETORY_GRANULE_ORGANIZATION		19	-0.394618	-1.05866	0.364629	0.507081	1	705	tags=16%, list=6%, signal=17%
GO_PROTEIN_CATABOLIC_PROCESS	GO_PROTEIN_CATABOLIC_PROCESS		448	-0.233521	-1.05685	0.239374	0.510896	1	1460	tags=15%, list=13%, signal=16%
GO_EXOCYTIC_VESICLE_MEMBRANE	GO_EXOCYTIC_VESICLE_MEMBRANE		24	-0.371918	-1.05684	0.380952	0.51059	1	2405	tags=33%, list=21%, signal=42%
GO_REGULATION_OF_ATPASE_ACTIVITY	GO_REGULATION_OF_ATPASE_ACTIVITY		46	-0.323217	-1.05649	0.372093	0.511083	1	1824	tags=22%, list=16%, signal=26%
GO_SCHWANN_CELL_DIFFERENTIATION	GO_SCHWANN_CELL_DIFFERENTIATION		19	-0.385476	-1.05554	0.396341	0.512845	1	3111	tags=37%, list=27%, signal=50%
GO_RECEPTOR_REGULATOR_ACTIVITY	GO_RECEPTOR_REGULATOR_ACTIVITY		17	-0.39893	-1.05553	0.39375	0.512531	1	1601	tags=35%, list=14%, signal=41%
GO_NEGATIVE_REGULATION_OF_REACTIVE_OXYGEN_SPECIES_METABOLIC_PROCESS	GO_NEGATIVE_REGULATION_OF_REACTIVE_OXYGEN_SPECIES_METABOLIC_PROCESS		26	-0.360124	-1.05553	0.38755	0.512201	1	1002	tags=23%, list=9%, signal=25%
GO_4_IRON_4_SULFUR_CLUSTER_BINDING	GO_4_IRON_4_SULFUR_CLUSTER_BINDING		38	-0.337863	-1.05492	0.383966	0.513227	1	1341	tags=13%, list=12%, signal=15%
GO_REGULATION_OF_BLOOD_PRESSURE	GO_REGULATION_OF_BLOOD_PRESSURE		74	-0.295022	-1.05327	0.356522	0.516612	1	1543	tags=18%, list=13%, signal=20%
GO_ERBB2_SIGNALING_PATHWAY	GO_ERBB2_SIGNALING_PATHWAY		27	-0.358336	-1.05277	0.37234	0.517439	1	2101	tags=22%, list=18%, signal=27%
GO_MHC_CLASS_II_PROTEIN_COMPLEX_BINDING	GO_MHC_CLASS_II_PROTEIN_COMPLEX_BINDING		15	-0.415949	-1.05276	0.404211	0.517131	1	2290	tags=40%, list=20%, signal=50%
GO_RECEPTOR_METABOLIC_PROCESS	GO_RECEPTOR_METABOLIC_PROCESS		51	-0.311496	-1.05258	0.359081	0.517198	1	1053	tags=14%, list=9%, signal=15%
GO_CELL_MATRIX_ADHESION	GO_CELL_MATRIX_ADHESION		65	-0.298092	-1.05258	0.362256	0.516874	1	1018	tags=14%, list=9%, signal=15%
GO_DEVELOPMENTAL_PROCESS_INVOLVED_IN_REPRODUCTION	GO_DEVELOPMENTAL_PROCESS_INVOLVED_IN_REPRODUCTION		302	-0.241497	-1.05234	0.32043	0.517101	1	2048	tags=22%, list=18%, signal=25%
GO_REGULATION_OF_CELLULAR_COMPONENT_SIZE	GO_REGULATION_OF_CELLULAR_COMPONENT_SIZE		206	-0.250121	-1.05214	0.326754	0.51724	1	2400	tags=26%, list=21%, signal=32%
GO_REGULATION_OF_PROTEIN_IMPORT_INTO_NUCLEUS_TRANSLOCATION	GO_REGULATION_OF_PROTEIN_IMPORT_INTO_NUCLEUS_TRANSLOCATION		18	-0.393351	-1.0519	0.362069	0.517477	1	1542	tags=39%, list=13%, signal=45%
GO_CARBOXYLIC_ESTER_HYDROLASE_ACTIVITY	GO_CARBOXYLIC_ESTER_HYDROLASE_ACTIVITY		72	-0.294636	-1.05188	0.349451	0.51718	1	957	tags=13%, list=8%, signal=14%
GO_PHOSPHOLIPASE_C_ACTIVATING_G_PROTEIN_COUPLED_RECEPTOR_SIGNALING_PATHWAY	GO_PHOSPHOLIPASE_C_ACTIVATING_G_PROTEIN_COUPLED_RECEPTOR_SIGNALING_PATHWAY		21	-0.376112	-1.05174	0.376906	0.517195	1	599	tags=14%, list=5%, signal=15%
GO_ROUGH_ENDOPLASMIC_RETICULUM_MEMBRANE	GO_ROUGH_ENDOPLASMIC_RETICULUM_MEMBRANE		16	-0.405937	-1.0516	0.400871	0.5172	1	1824	tags=25%, list=16%, signal=30%
GO_LATE_ENDOSOME_MEMBRANE	GO_LATE_ENDOSOME_MEMBRANE		85	-0.286789	-1.05126	0.343478	0.517638	1	1500	tags=21%, list=13%, signal=24%
GO_FOREBRAIN_DEVELOPMENT	GO_FOREBRAIN_DEVELOPMENT		177	-0.256752	-1.05087	0.320542	0.518161	1	1029	tags=13%, list=9%, signal=14%
GO_RESPONSE_TO_MONOAMINE	GO_RESPONSE_TO_MONOAMINE		21	-0.383528	-1.0506	0.376368	0.518444	1	1532	tags=29%, list=13%, signal=33%
GO_REGULATION_OF_AUTOPHAGY	GO_REGULATION_OF_AUTOPHAGY		207	-0.252501	-1.04959	0.304348	0.520394	1	2364	tags=25%, list=20%, signal=30%
GO_DEVELOPMENTAL_GROWTH	GO_DEVELOPMENTAL_GROWTH		173	-0.259015	-1.04928	0.332574	0.520751	1	2618	tags=31%, list=23%, signal=40%
GO_DIGESTIVE_SYSTEM_DEVELOPMENT	GO_DIGESTIVE_SYSTEM_DEVELOPMENT		60	-0.30004	-1.04899	0.369168	0.521092	1	2148	tags=28%, list=19%, signal=35%
GO_POSITIVE_REGULATION_OF_LAMELLIPODIUM_ORGANIZATION	GO_POSITIVE_REGULATION_OF_LAMELLIPODIUM_ORGANIZATION		19	-0.388044	-1.04883	0.382294	0.521129	1	3678	tags=53%, list=32%, signal=77%
GO_UNFOLDED_PROTEIN_BINDING	GO_UNFOLDED_PROTEIN_BINDING		79	-0.288111	-1.04779	0.350701	0.523193	1	1330	tags=20%, list=11%, signal=23%
GO_GROWTH	GO_GROWTH		211	-0.250141	-1.04717	0.338496	0.524391	1	2400	tags=27%, list=21%, signal=34%
GO_RNA_POLYMERASE_II_CARBOXY_TERMINAL_DOMAIN_KINASE_ACTIVITY	GO_RNA_POLYMERASE_II_CARBOXY_TERMINAL_DOMAIN_KINASE_ACTIVITY		16	-0.414354	-1.04702	0.388889	0.524393	1	2710	tags=38%, list=23%, signal=49%
GO_CHD_TYPE_COMPLEX	GO_CHD_TYPE_COMPLEX		15	-0.414411	-1.04697	0.384298	0.524196	1	1832	tags=33%, list=16%, signal=40%
GO_SKELETAL_SYSTEM_MORPHOGENESIS	GO_SKELETAL_SYSTEM_MORPHOGENESIS		88	-0.280087	-1.04686	0.361233	0.524088	1	1488	tags=16%, list=13%, signal=18%
GO_TRANS_GOLGI_NETWORK_TRANSPORT_VESICLE	GO_TRANS_GOLGI_NETWORK_TRANSPORT_VESICLE		22	-0.372463	-1.04679	0.379032	0.523917	1	1619	tags=27%, list=14%, signal=32%
GO_PROTEIN_DOMAIN_SPECIFIC_BINDING	GO_PROTEIN_DOMAIN_SPECIFIC_BINDING		425	-0.233881	-1.04621	0.275862	0.5249	1	2215	tags=23%, list=19%, signal=27%
GO_MEMBRANE_BUDDING	GO_MEMBRANE_BUDDING		96	-0.280685	-1.04621	0.345912	0.524568	1	1518	tags=20%, list=13%, signal=23%
GO_SULFUR_AMINO_ACID_BIOSYNTHETIC_PROCESS	GO_SULFUR_AMINO_ACID_BIOSYNTHETIC_PROCESS		17	-0.39636	-1.04594	0.377395	0.524833	1	207	tags=12%, list=2%, signal=12%
GO_FATTY_ACYL_COA_BINDING	GO_FATTY_ACYL_COA_BINDING		26	-0.356675	-1.04564	0.37721	0.525237	1	945	tags=15%, list=8%, signal=17%
GO_MEMBRANE_LIPID_METABOLIC_PROCESS	GO_MEMBRANE_LIPID_METABOLIC_PROCESS		122	-0.267701	-1.0454	0.359307	0.525472	1	1658	tags=20%, list=14%, signal=24%
GO_VESICLE_DOCKING	GO_VESICLE_DOCKING		39	-0.329827	-1.04535	0.380252	0.525244	1	2309	tags=31%, list=20%, signal=38%
GO_CORTICAL_CYTOSKELETON	GO_CORTICAL_CYTOSKELETON		48	-0.312329	-1.04499	0.372984	0.525759	1	1049	tags=17%, list=9%, signal=18%
GO_RIBONUCLEOTIDE_CATABOLIC_PROCESS	GO_RIBONUCLEOTIDE_CATABOLIC_PROCESS		22	-0.368785	-1.04453	0.389831	0.526476	1	1586	tags=18%, list=14%, signal=21%
GO_DEPHOSPHORYLATION	GO_DEPHOSPHORYLATION		200	-0.250728	-1.0445	0.327628	0.526202	1	2061	tags=20%, list=18%, signal=24%
GO_ALCOHOL_METABOLIC_PROCESS	GO_ALCOHOL_METABOLIC_PROCESS		216	-0.249411	-1.04436	0.329571	0.526212	1	1543	tags=17%, list=13%, signal=19%
GO_RENAL_TUBULE_DEVELOPMENT	GO_RENAL_TUBULE_DEVELOPMENT		34	-0.334093	-1.04329	0.378486	0.52842	1	2512	tags=38%, list=22%, signal=49%
GO_REGULATION_OF_MITOCHONDRION_ORGANIZATION	GO_REGULATION_OF_MITOCHONDRION_ORGANIZATION		167	-0.256612	-1.04311	0.34009	0.528517	1	1720	tags=21%, list=15%, signal=24%
GO_B_CELL_MEDIATED_IMMUNITY	GO_B_CELL_MEDIATED_IMMUNITY		45	-0.316833	-1.04249	0.366197	0.529575	1	2500	tags=31%, list=22%, signal=40%
GO_NEURAL_TUBE_FORMATION	GO_NEURAL_TUBE_FORMATION		64	-0.29543	-1.04238	0.369478	0.529505	1	1780	tags=17%, list=15%, signal=20%
GO_POSITIVE_REGULATION_OF_PROTEIN_AUTOPHOSPHORYLATION	GO_POSITIVE_REGULATION_OF_PROTEIN_AUTOPHOSPHORYLATION		15	-0.404363	-1.04194	0.413502	0.530153	1	2053	tags=33%, list=18%, signal=40%
GO_ANCHORED_COMPONENT_OF_PLASMA_MEMBRANE	GO_ANCHORED_COMPONENT_OF_PLASMA_MEMBRANE		15	-0.41703	-1.04174	0.40535	0.53031	1	537	tags=20%, list=5%, signal=21%
GO_STAT_CASCADE	GO_STAT_CASCADE		36	-0.336302	-1.04089	0.385621	0.531979	1	2105	tags=28%, list=18%, signal=34%
GO_KINESIN_BINDING	GO_KINESIN_BINDING		18	-0.397381	-1.04044	0.406522	0.532688	1	2469	tags=33%, list=21%, signal=42%
GO_REGULATION_OF_PROTEOLYSIS	GO_REGULATION_OF_PROTEOLYSIS		458	-0.228841	-1.03973	0.314159	0.533993	1	1367	tags=14%, list=12%, signal=15%
GO_ESTABLISHMENT_OF_SPINDLE_ORIENTATION	GO_ESTABLISHMENT_OF_SPINDLE_ORIENTATION		20	-0.378188	-1.03973	0.396552	0.533659	1	1808	tags=35%, list=16%, signal=41%
GO_HORMONE_METABOLIC_PROCESS	GO_HORMONE_METABOLIC_PROCESS		59	-0.300818	-1.03956	0.369198	0.533694	1	2432	tags=29%, list=21%, signal=36%
GO_REGULATION_OF_GLUCOSE_IMPORT	GO_REGULATION_OF_GLUCOSE_IMPORT		35	-0.335098	-1.03908	0.399582	0.534472	1	2331	tags=31%, list=20%, signal=39%
GO_DNA_ALKYLATION	GO_DNA_ALKYLATION		27	-0.352487	-1.03853	0.388889	0.535449	1	1832	tags=30%, list=16%, signal=35%
GO_REGULATION_OF_CHROMATIN_SILENCING	GO_REGULATION_OF_CHROMATIN_SILENCING		18	-0.387986	-1.03836	0.39479	0.535543	1	947	tags=11%, list=8%, signal=12%
GO_HEART_DEVELOPMENT	GO_HEART_DEVELOPMENT		252	-0.244371	-1.038	0.333333	0.536076	1	1542	tags=15%, list=13%, signal=17%
GO_REGULATION_OF_SODIUM_ION_TRANSPORT	GO_REGULATION_OF_SODIUM_ION_TRANSPORT		40	-0.318887	-1.0366	0.379771	0.539041	1	2859	tags=30%, list=25%, signal=40%
GO_CARBON_OXYGEN_LYASE_ACTIVITY	GO_CARBON_OXYGEN_LYASE_ACTIVITY		50	-0.312021	-1.03636	0.368085	0.539252	1	856	tags=14%, list=7%, signal=15%
GO_AXON_EXTENSION	GO_AXON_EXTENSION		17	-0.39233	-1.03608	0.404124	0.539545	1	307	tags=12%, list=3%, signal=12%
GO_VASODILATION	GO_VASODILATION		15	-0.410248	-1.03552	0.407249	0.540496	1	827	tags=20%, list=7%, signal=22%
GO_POSITIVE_REGULATION_OF_MULTICELLULAR_ORGANISM_GROWTH	GO_POSITIVE_REGULATION_OF_MULTICELLULAR_ORGANISM_GROWTH		17	-0.392532	-1.03481	0.394477	0.541823	1	3064	tags=53%, list=26%, signal=72%
GO_REGULATION_OF_PROTEIN_CATABOLIC_PROCESS	GO_REGULATION_OF_PROTEIN_CATABOLIC_PROCESS		305	-0.239454	-1.03461	0.336207	0.541977	1	1213	tags=12%, list=10%, signal=13%
GO_OXIDOREDUCTASE_COMPLEX	GO_OXIDOREDUCTASE_COMPLEX		82	-0.286758	-1.0341	0.400881	0.542893	1	1937	tags=21%, list=17%, signal=25%
GO_ENZYME_INHIBITOR_ACTIVITY	GO_ENZYME_INHIBITOR_ACTIVITY		181	-0.252382	-1.03285	0.392781	0.545534	1	2166	tags=22%, list=19%, signal=26%
GO_REGULATION_OF_TRANSCRIPTION_FROM_RNA_POLYMERASE_I_PROMOTER	GO_REGULATION_OF_TRANSCRIPTION_FROM_RNA_POLYMERASE_I_PROMOTER		20	-0.375999	-1.03176	0.403579	0.547777	1	1452	tags=30%, list=13%, signal=34%
GO_VESICLE_COAT	GO_VESICLE_COAT		40	-0.320253	-1.03155	0.386694	0.547907	1	2261	tags=28%, list=20%, signal=34%
GO_ACTION_POTENTIAL	GO_ACTION_POTENTIAL		33	-0.333	-1.03132	0.399598	0.548089	1	1438	tags=27%, list=12%, signal=31%
GO_CELLULAR_COMPONENT_MORPHOGENESIS	GO_CELLULAR_COMPONENT_MORPHOGENESIS		455	-0.224757	-1.03132	0.325275	0.54776	1	1875	tags=18%, list=16%, signal=21%
GO_GOLGI_TO_VACUOLE_TRANSPORT	GO_GOLGI_TO_VACUOLE_TRANSPORT		23	-0.368092	-1.03064	0.423404	0.549045	1	1690	tags=22%, list=15%, signal=25%
GO_CELL_CORTEX	GO_CELL_CORTEX		145	-0.256995	-1.03013	0.402083	0.549938	1	2134	tags=24%, list=18%, signal=29%
GO_COATED_PIT	GO_COATED_PIT		46	-0.311484	-1.02999	0.406639	0.549927	1	2196	tags=24%, list=19%, signal=29%
GO_POSITIVE_REGULATION_OF_LEUKOCYTE_APOPTOTIC_PROCESS	GO_POSITIVE_REGULATION_OF_LEUKOCYTE_APOPTOTIC_PROCESS		22	-0.374067	-1.0297	0.395918	0.550269	1	1017	tags=23%, list=9%, signal=25%
GO_DEAMINASE_ACTIVITY	GO_DEAMINASE_ACTIVITY		22	-0.372115	-1.02904	0.406571	0.551478	1	2521	tags=45%, list=22%, signal=58%
GO_POSITIVE_REGULATION_OF_CALCIUM_ION_TRANSMEMBRANE_TRANSPORTER_ACTIVITY	GO_POSITIVE_REGULATION_OF_CALCIUM_ION_TRANSMEMBRANE_TRANSPORTER_ACTIVITY		19	-0.389599	-1.02831	0.409871	0.552844	1	1808	tags=26%, list=16%, signal=31%
GO_REGULATION_OF_PROTEIN_EXPORT_FROM_NUCLEUS	GO_REGULATION_OF_PROTEIN_EXPORT_FROM_NUCLEUS		27	-0.350857	-1.02817	0.409186	0.552825	1	2614	tags=41%, list=23%, signal=52%
GO_E_BOX_BINDING	GO_E_BOX_BINDING		17	-0.403669	-1.02731	0.423581	0.55452	1	2421	tags=29%, list=21%, signal=37%
GO_ORGANIC_HYDROXY_COMPOUND_METABOLIC_PROCESS	GO_ORGANIC_HYDROXY_COMPOUND_METABOLIC_PROCESS		275	-0.238842	-1.02698	0.37149	0.554986	1	1543	tags=16%, list=13%, signal=18%
GO_MONOCARBOXYLIC_ACID_BIOSYNTHETIC_PROCESS	GO_MONOCARBOXYLIC_ACID_BIOSYNTHETIC_PROCESS		90	-0.275116	-1.02684	0.395455	0.555002	1	2223	tags=27%, list=19%, signal=33%
GO_RECYCLING_ENDOSOME_MEMBRANE	GO_RECYCLING_ENDOSOME_MEMBRANE		35	-0.324146	-1.02641	0.420582	0.555645	1	2053	tags=26%, list=18%, signal=31%
GO_STEROID_HORMONE_RECEPTOR_ACTIVITY	GO_STEROID_HORMONE_RECEPTOR_ACTIVITY		29	-0.348241	-1.02607	0.430353	0.556075	1	1478	tags=21%, list=13%, signal=24%
GO_POSITIVE_REGULATION_OF_VASCULAR_ENDOTHELIAL_GROWTH_FACTOR_PRODUCTION	GO_POSITIVE_REGULATION_OF_VASCULAR_ENDOTHELIAL_GROWTH_FACTOR_PRODUCTION		17	-0.387872	-1.02597	0.423387	0.555983	1	1751	tags=47%, list=15%, signal=55%
GO_SYMPORTER_ACTIVITY	GO_SYMPORTER_ACTIVITY		58	-0.298805	-1.02476	0.409692	0.55862	1	1157	tags=17%, list=10%, signal=19%
GO_NOTCH_SIGNALING_PATHWAY	GO_NOTCH_SIGNALING_PATHWAY		74	-0.282377	-1.02476	0.37797	0.558279	1	2353	tags=27%, list=20%, signal=34%
GO_BODY_MORPHOGENESIS	GO_BODY_MORPHOGENESIS		23	-0.359242	-1.02466	0.427646	0.558184	1	1627	tags=30%, list=14%, signal=35%
GO_CEREBRAL_CORTEX_CELL_MIGRATION	GO_CEREBRAL_CORTEX_CELL_MIGRATION		18	-0.379833	-1.0246	0.429501	0.557974	1	3111	tags=44%, list=27%, signal=61%
GO_REGULATION_OF_TRANSCRIPTION_REGULATORY_REGION_DNA_BINDING	GO_REGULATION_OF_TRANSCRIPTION_REGULATORY_REGION_DNA_BINDING		24	-0.359063	-1.02456	0.394628	0.557729	1	751	tags=13%, list=6%, signal=13%
GO_CELLULAR_TRANSITION_METAL_ION_HOMEOSTASIS	GO_CELLULAR_TRANSITION_METAL_ION_HOMEOSTASIS		44	-0.317361	-1.02444	0.437778	0.557681	1	983	tags=14%, list=8%, signal=15%
GO_REGULATION_OF_RELEASE_OF_CYTOCHROME_C_FROM_MITOCHONDRIA	GO_REGULATION_OF_RELEASE_OF_CYTOCHROME_C_FROM_MITOCHONDRIA		38	-0.325584	-1.0241	0.441955	0.55814	1	625	tags=16%, list=5%, signal=17%
GO_NEGATIVE_REGULATION_OF_WOUND_HEALING	GO_NEGATIVE_REGULATION_OF_WOUND_HEALING		22	-0.366109	-1.02393	0.420043	0.558174	1	1388	tags=23%, list=12%, signal=26%
GO_REGULATION_OF_PROTEIN_COMPLEX_ASSEMBLY	GO_REGULATION_OF_PROTEIN_COMPLEX_ASSEMBLY		264	-0.238855	-1.02254	0.37149	0.561183	1	2164	tags=23%, list=19%, signal=27%
GO_MYD88_INDEPENDENT_TOLL_LIKE_RECEPTOR_SIGNALING_PATHWAY	GO_MYD88_INDEPENDENT_TOLL_LIKE_RECEPTOR_SIGNALING_PATHWAY		27	-0.349239	-1.02214	0.428274	0.561806	1	2268	tags=26%, list=20%, signal=32%
GO_PROTEIN_ADP_RIBOSYLATION	GO_PROTEIN_ADP_RIBOSYLATION		15	-0.396999	-1.02194	0.449679	0.561965	1	1316	tags=27%, list=11%, signal=30%
GO_NEGATIVE_REGULATION_OF_LEUKOCYTE_MIGRATION	GO_NEGATIVE_REGULATION_OF_LEUKOCYTE_MIGRATION		15	-0.40616	-1.02119	0.425358	0.563408	1	1483	tags=27%, list=13%, signal=31%
GO_REGULATION_OF_SMALL_GTPASE_MEDIATED_SIGNAL_TRANSDUCTION	GO_REGULATION_OF_SMALL_GTPASE_MEDIATED_SIGNAL_TRANSDUCTION		173	-0.249488	-1.02093	0.390342	0.563689	1	1944	tags=22%, list=17%, signal=26%
GO_CLUSTER_OF_ACTIN_BASED_CELL_PROJECTIONS	GO_CLUSTER_OF_ACTIN_BASED_CELL_PROJECTIONS		64	-0.289678	-1.02017	0.403475	0.565145	1	1722	tags=19%, list=15%, signal=22%
GO_RNA_STABILIZATION	GO_RNA_STABILIZATION		24	-0.358244	-1.02006	0.42827	0.565079	1	2387	tags=29%, list=21%, signal=37%
GO_CALCIUM_DEPENDENT_PROTEIN_BINDING	GO_CALCIUM_DEPENDENT_PROTEIN_BINDING		35	-0.327009	-1.02003	0.422833	0.56479	1	968	tags=17%, list=8%, signal=19%
GO_POSITIVE_REGULATION_OF_GLIAL_CELL_DIFFERENTIATION	GO_POSITIVE_REGULATION_OF_GLIAL_CELL_DIFFERENTIATION		21	-0.368426	-1.01984	0.436681	0.564898	1	1532	tags=29%, list=13%, signal=33%
GO_FOREBRAIN_CELL_MIGRATION	GO_FOREBRAIN_CELL_MIGRATION		25	-0.352013	-1.0194	0.419149	0.565589	1	3111	tags=40%, list=27%, signal=55%
GO_HYDROLASE_ACTIVITY_ACTING_ON_CARBON_NITROGEN_BUT_NOT_PEPTIDE_BONDS_IN_CYCLIC_AMIDINES	GO_HYDROLASE_ACTIVITY_ACTING_ON_CARBON_NITROGEN_BUT_NOT_PEPTIDE_BONDS_IN_CYCLIC_AMIDINES		23	-0.36654	-1.01933	0.440928	0.565396	1	2745	tags=48%, list=24%, signal=63%
GO_PALMITOYLTRANSFERASE_ACTIVITY	GO_PALMITOYLTRANSFERASE_ACTIVITY		25	-0.362383	-1.01923	0.445122	0.565287	1	2187	tags=32%, list=19%, signal=39%
GO_REGULATION_OF_T_HELPER_CELL_DIFFERENTIATION	GO_REGULATION_OF_T_HELPER_CELL_DIFFERENTIATION		17	-0.385564	-1.01831	0.429735	0.567244	1	2369	tags=35%, list=20%, signal=44%
GO_NEGATIVE_REGULATION_OF_ERK1_AND_ERK2_CASCADE	GO_NEGATIVE_REGULATION_OF_ERK1_AND_ERK2_CASCADE		38	-0.323004	-1.01826	0.423387	0.567016	1	2812	tags=34%, list=24%, signal=45%
GO_EMBRYO_DEVELOPMENT_ENDING_IN_BIRTH_OR_EGG_HATCHING	GO_EMBRYO_DEVELOPMENT_ENDING_IN_BIRTH_OR_EGG_HATCHING		327	-0.231856	-1.01795	0.393939	0.567418	1	2022	tags=20%, list=17%, signal=24%
GO_CELL_MATURATION	GO_CELL_MATURATION		66	-0.288174	-1.01785	0.422594	0.567319	1	366	tags=11%, list=3%, signal=11%
GO_POSITIVE_REGULATION_OF_INTERLEUKIN_4_PRODUCTION	GO_POSITIVE_REGULATION_OF_INTERLEUKIN_4_PRODUCTION		16	-0.394699	-1.01768	0.414784	0.567394	1	2798	tags=50%, list=24%, signal=66%
GO_NEGATIVE_REGULATION_OF_CELLULAR_AMIDE_METABOLIC_PROCESS	GO_NEGATIVE_REGULATION_OF_CELLULAR_AMIDE_METABOLIC_PROCESS		94	-0.27201	-1.01765	0.44186	0.567119	1	505	tags=9%, list=4%, signal=9%
GO_REGULATION_OF_GLUCONEOGENESIS	GO_REGULATION_OF_GLUCONEOGENESIS		21	-0.376548	-1.01718	0.427686	0.567904	1	1923	tags=29%, list=17%, signal=34%
GO_CELL_CORTEX_PART	GO_CELL_CORTEX_PART		74	-0.283226	-1.01713	0.442697	0.567671	1	1049	tags=16%, list=9%, signal=18%
GO_PROTEIN_LOCALIZATION_TO_MEMBRANE	GO_PROTEIN_LOCALIZATION_TO_MEMBRANE		288	-0.236385	-1.0171	0.416847	0.567411	1	2119	tags=22%, list=18%, signal=26%
GO_NEGATIVE_REGULATION_OF_CYSTEINE_TYPE_ENDOPEPTIDASE_ACTIVITY	GO_NEGATIVE_REGULATION_OF_CYSTEINE_TYPE_ENDOPEPTIDASE_ACTIVITY		63	-0.288819	-1.01694	0.418557	0.567432	1	1808	tags=27%, list=16%, signal=32%
GO_CALCIUM_DEPENDENT_PHOSPHOLIPID_BINDING	GO_CALCIUM_DEPENDENT_PHOSPHOLIPID_BINDING		24	-0.362593	-1.01692	0.426752	0.567154	1	1043	tags=25%, list=9%, signal=27%
GO_ESTABLISHMENT_OF_PROTEIN_LOCALIZATION_TO_VACUOLE	GO_ESTABLISHMENT_OF_PROTEIN_LOCALIZATION_TO_VACUOLE		28	-0.343768	-1.01679	0.421488	0.56713	1	1500	tags=25%, list=13%, signal=29%
GO_EAR_DEVELOPMENT	GO_EAR_DEVELOPMENT		77	-0.278806	-1.01666	0.407407	0.567114	1	1290	tags=17%, list=11%, signal=19%
GO_FOREBRAIN_GENERATION_OF_NEURONS	GO_FOREBRAIN_GENERATION_OF_NEURONS		24	-0.353359	-1.01659	0.41841	0.566916	1	647	tags=17%, list=6%, signal=18%
GO_NUCLEOTIDE_KINASE_ACTIVITY	GO_NUCLEOTIDE_KINASE_ACTIVITY		16	-0.401006	-1.01654	0.421162	0.566695	1	286	tags=19%, list=2%, signal=19%
GO_MULTICELLULAR_ORGANISM_AGING	GO_MULTICELLULAR_ORGANISM_AGING		20	-0.371969	-1.01586	0.45929	0.567971	1	2148	tags=35%, list=19%, signal=43%
GO_RECEPTOR_ACTIVITY	GO_RECEPTOR_ACTIVITY		476	-0.223498	-1.01444	0.400891	0.571039	1	1478	tags=16%, list=13%, signal=17%
GO_LIPID_TRANSPORTER_ACTIVITY	GO_LIPID_TRANSPORTER_ACTIVITY		51	-0.300307	-1.01278	0.449275	0.574674	1	2046	tags=25%, list=18%, signal=31%
GO_SENSORY_PERCEPTION_OF_MECHANICAL_STIMULUS	GO_SENSORY_PERCEPTION_OF_MECHANICAL_STIMULUS		63	-0.288285	-1.01124	0.416162	0.578081	1	824	tags=10%, list=7%, signal=10%
GO_CIRCADIAN_RHYTHM	GO_CIRCADIAN_RHYTHM		88	-0.2732	-1.01112	0.435417	0.578028	1	2041	tags=26%, list=18%, signal=31%
GO_TRANSCRIPTION_FACTOR_COMPLEX	GO_TRANSCRIPTION_FACTOR_COMPLEX		198	-0.242663	-1.01105	0.435518	0.577869	1	1724	tags=19%, list=15%, signal=22%
GO_REGULATION_OF_ENDOTHELIAL_CELL_DIFFERENTIATION	GO_REGULATION_OF_ENDOTHELIAL_CELL_DIFFERENTIATION		15	-0.399629	-1.01045	0.45339	0.578974	1	18	tags=7%, list=0%, signal=7%
GO_RECEPTOR_CLUSTERING	GO_RECEPTOR_CLUSTERING		23	-0.360668	-1.00962	0.463362	0.580721	1	1282	tags=26%, list=11%, signal=29%
GO_HEPARAN_SULFATE_PROTEOGLYCAN_METABOLIC_PROCESS	GO_HEPARAN_SULFATE_PROTEOGLYCAN_METABOLIC_PROCESS		15	-0.390345	-1.00943	0.447423	0.580807	1	1741	tags=20%, list=15%, signal=24%
GO_OXIDOREDUCTASE_ACTIVITY	GO_OXIDOREDUCTASE_ACTIVITY		454	-0.222964	-1.00923	0.424942	0.580956	1	1838	tags=19%, list=16%, signal=22%
GO_MALE_SEX_DIFFERENTIATION	GO_MALE_SEX_DIFFERENTIATION		71	-0.280662	-1.00896	0.443299	0.581249	1	1912	tags=23%, list=17%, signal=27%
GO_MULTI_ORGANISM_REPRODUCTIVE_PROCESS	GO_MULTI_ORGANISM_REPRODUCTIVE_PROCESS		430	-0.224252	-1.00892	0.41055	0.580992	1	2069	tags=21%, list=18%, signal=24%
GO_PROTEIN_FOLDING	GO_PROTEIN_FOLDING		161	-0.249178	-1.00772	0.426304	0.583481	1	789	tags=12%, list=7%, signal=12%
GO_CHONDROITIN_SULFATE_PROTEOGLYCAN_METABOLIC_PROCESS	GO_CHONDROITIN_SULFATE_PROTEOGLYCAN_METABOLIC_PROCESS		21	-0.364845	-1.00647	0.432735	0.586128	1	1604	tags=24%, list=14%, signal=28%
GO_CELL_CELL_RECOGNITION	GO_CELL_CELL_RECOGNITION		28	-0.334517	-1.00616	0.451943	0.586491	1	1087	tags=18%, list=9%, signal=20%
GO_SIGNAL_PEPTIDE_PROCESSING	GO_SIGNAL_PEPTIDE_PROCESSING		16	-0.395666	-1.00615	0.478351	0.58617	1	1565	tags=25%, list=14%, signal=29%
GO_PML_BODY	GO_PML_BODY		78	-0.282065	-1.00546	0.458078	0.587445	1	1022	tags=13%, list=9%, signal=14%
GO_POSITIVE_REGULATION_OF_MICROTUBULE_POLYMERIZATION	GO_POSITIVE_REGULATION_OF_MICROTUBULE_POLYMERIZATION		15	-0.387848	-1.00482	0.462039	0.588634	1	2114	tags=27%, list=18%, signal=33%
GO_CYTOKINE_RECEPTOR_ACTIVITY	GO_CYTOKINE_RECEPTOR_ACTIVITY		47	-0.299383	-1.00443	0.464052	0.58924	1	2645	tags=38%, list=23%, signal=49%
GO_PHOSPHOPROTEIN_BINDING	GO_PHOSPHOPROTEIN_BINDING		46	-0.307679	-1.00407	0.454348	0.589761	1	485	tags=11%, list=4%, signal=11%
GO_TRANSPORTER_COMPLEX	GO_TRANSPORTER_COMPLEX		98	-0.264617	-1.00406	0.432372	0.589426	1	1445	tags=16%, list=12%, signal=18%
GO_REGULATION_OF_CELL_CYCLE_G1_S_PHASE_TRANSITION	GO_REGULATION_OF_CELL_CYCLE_G1_S_PHASE_TRANSITION		117	-0.25874	-1.00397	0.454728	0.589304	1	1819	tags=21%, list=16%, signal=24%
GO_CELLULAR_RESPONSE_TO_STEROID_HORMONE_STIMULUS	GO_CELLULAR_RESPONSE_TO_STEROID_HORMONE_STIMULUS		133	-0.254398	-1.0037	0.430085	0.589609	1	760	tags=11%, list=7%, signal=12%
GO_RESPONSE_TO_ATP	GO_RESPONSE_TO_ATP		18	-0.385314	-1.00283	0.468379	0.591357	1	2350	tags=33%, list=20%, signal=42%
GO_CELL_DIVISION_SITE	GO_CELL_DIVISION_SITE		46	-0.306263	-1.00261	0.457661	0.591512	1	435	tags=9%, list=4%, signal=9%
GO_REGULATION_OF_GLYCOPROTEIN_METABOLIC_PROCESS	GO_REGULATION_OF_GLYCOPROTEIN_METABOLIC_PROCESS		26	-0.339551	-1.00245	0.448692	0.591534	1	1002	tags=19%, list=9%, signal=21%
GO_EPITHELIAL_CELL_DEVELOPMENT	GO_EPITHELIAL_CELL_DEVELOPMENT		102	-0.261323	-1.00191	0.415094	0.592509	1	2205	tags=27%, list=19%, signal=34%
GO_CELLULAR_LIPID_CATABOLIC_PROCESS	GO_CELLULAR_LIPID_CATABOLIC_PROCESS		94	-0.264093	-1.00101	0.471215	0.594342	1	2168	tags=26%, list=19%, signal=31%
GO_SULFUR_COMPOUND_BINDING	GO_SULFUR_COMPOUND_BINDING		101	-0.265473	-0.999475	0.456954	0.597797	1	945	tags=13%, list=8%, signal=14%
GO_TRANSITION_METAL_ION_HOMEOSTASIS	GO_TRANSITION_METAL_ION_HOMEOSTASIS		65	-0.289238	-0.999339	0.44181	0.597782	1	1370	tags=14%, list=12%, signal=16%
GO_NEGATIVE_REGULATION_OF_CELLULAR_RESPONSE_TO_GROWTH_FACTOR_STIMULUS	GO_NEGATIVE_REGULATION_OF_CELLULAR_RESPONSE_TO_GROWTH_FACTOR_STIMULUS		60	-0.290265	-0.998341	0.460554	0.599845	1	2859	tags=33%, list=25%, signal=44%
GO_ESTABLISHMENT_OF_MITOTIC_SPINDLE_ORIENTATION	GO_ESTABLISHMENT_OF_MITOTIC_SPINDLE_ORIENTATION		15	-0.38874	-0.997617	0.454728	0.601242	1	1808	tags=40%, list=16%, signal=47%
GO_REGULATION_OF_STEM_CELL_PROLIFERATION	GO_REGULATION_OF_STEM_CELL_PROLIFERATION		47	-0.296683	-0.99713	0.446541	0.602076	1	2257	tags=28%, list=19%, signal=34%
GO_RESPONSE_TO_ALKALOID	GO_RESPONSE_TO_ALKALOID		74	-0.279647	-0.997038	0.454545	0.601955	1	1822	tags=19%, list=16%, signal=22%
GO_NEGATIVE_REGULATION_OF_PEPTIDASE_ACTIVITY	GO_NEGATIVE_REGULATION_OF_PEPTIDASE_ACTIVITY		111	-0.257365	-0.996813	0.456967	0.602182	1	1821	tags=21%, list=16%, signal=24%
GO_SMOOTH_MUSCLE_CONTRACTION	GO_SMOOTH_MUSCLE_CONTRACTION		19	-0.370043	-0.996001	0.459052	0.603822	1	2225	tags=32%, list=19%, signal=39%
GO_NEGATIVE_REGULATION_OF_CATION_CHANNEL_ACTIVITY	GO_NEGATIVE_REGULATION_OF_CATION_CHANNEL_ACTIVITY		16	-0.388678	-0.995775	0.475162	0.604046	1	543	tags=13%, list=5%, signal=13%
GO_POSITIVE_REGULATION_OF_GLUCOSE_METABOLIC_PROCESS	GO_POSITIVE_REGULATION_OF_GLUCOSE_METABOLIC_PROCESS		18	-0.382288	-0.995543	0.466942	0.604276	1	627	tags=17%, list=5%, signal=18%
GO_ESCRT_COMPLEX	GO_ESCRT_COMPLEX		24	-0.343337	-0.994802	0.463964	0.605737	1	1500	tags=25%, list=13%, signal=29%
GO_PHOSPHATIDIC_ACID_METABOLIC_PROCESS	GO_PHOSPHATIDIC_ACID_METABOLIC_PROCESS		21	-0.365283	-0.994638	0.459677	0.605794	1	2916	tags=43%, list=25%, signal=57%
GO_AGGRESOME	GO_AGGRESOME		25	-0.344275	-0.994035	0.462745	0.606908	1	2194	tags=24%, list=19%, signal=30%
GO_CARDIAC_CONDUCTION	GO_CARDIAC_CONDUCTION		28	-0.335623	-0.993401	0.469083	0.608122	1	2446	tags=36%, list=21%, signal=45%
GO_PHOSPHOLIPID_BIOSYNTHETIC_PROCESS	GO_PHOSPHOLIPID_BIOSYNTHETIC_PROCESS		176	-0.241128	-0.993287	0.466814	0.608053	1	2666	tags=27%, list=23%, signal=34%
GO_ARTERY_DEVELOPMENT	GO_ARTERY_DEVELOPMENT		35	-0.319693	-0.992516	0.478992	0.609553	1	1722	tags=26%, list=15%, signal=30%
GO_CELLULAR_RESPONSE_TO_CAMP	GO_CELLULAR_RESPONSE_TO_CAMP		24	-0.340603	-0.991952	0.468951	0.610549	1	1542	tags=29%, list=13%, signal=34%
GO_REGULATION_OF_NIK_NF_KAPPAB_SIGNALING	GO_REGULATION_OF_NIK_NF_KAPPAB_SIGNALING		32	-0.32745	-0.991781	0.460417	0.6106	1	767	tags=13%, list=7%, signal=13%
GO_CELLULAR_CARBOHYDRATE_BIOSYNTHETIC_PROCESS	GO_CELLULAR_CARBOHYDRATE_BIOSYNTHETIC_PROCESS		32	-0.32746	-0.991056	0.476744	0.612093	1	2275	tags=31%, list=20%, signal=39%
GO_ESTABLISHMENT_OF_CELL_POLARITY	GO_ESTABLISHMENT_OF_CELL_POLARITY		64	-0.283873	-0.990881	0.457023	0.612148	1	2373	tags=30%, list=20%, signal=37%
GO_LIGAND_DEPENDENT_NUCLEAR_RECEPTOR_TRANSCRIPTION_COACTIVATOR_ACTIVITY	GO_LIGAND_DEPENDENT_NUCLEAR_RECEPTOR_TRANSCRIPTION_COACTIVATOR_ACTIVITY		45	-0.299917	-0.989782	0.482402	0.614452	1	2181	tags=18%, list=19%, signal=22%
GO_T_CELL_PROLIFERATION	GO_T_CELL_PROLIFERATION		27	-0.34212	-0.989487	0.481092	0.614823	1	2812	tags=52%, list=24%, signal=68%
GO_RESPONSE_TO_COPPER_ION	GO_RESPONSE_TO_COPPER_ION		18	-0.362146	-0.98933	0.452138	0.614856	1	1824	tags=28%, list=16%, signal=33%
GO_NEGATIVE_REGULATION_OF_CELL_GROWTH	GO_NEGATIVE_REGULATION_OF_CELL_GROWTH		93	-0.26003	-0.9893	0.502016	0.614559	1	1541	tags=17%, list=13%, signal=20%
GO_REGULATION_OF_MRNA_CATABOLIC_PROCESS	GO_REGULATION_OF_MRNA_CATABOLIC_PROCESS		21	-0.361338	-0.9884	0.473348	0.616459	1	1308	tags=19%, list=11%, signal=21%
GO_CELLULAR_MONOVALENT_INORGANIC_CATION_HOMEOSTASIS	GO_CELLULAR_MONOVALENT_INORGANIC_CATION_HOMEOSTASIS		53	-0.293134	-0.987503	0.456033	0.618361	1	2243	tags=28%, list=19%, signal=35%
GO_MONOVALENT_INORGANIC_CATION_HOMEOSTASIS	GO_MONOVALENT_INORGANIC_CATION_HOMEOSTASIS		65	-0.280335	-0.987469	0.461224	0.618082	1	1002	tags=14%, list=9%, signal=15%
GO_PHOSPHATIDYLINOSITOL_3_PHOSPHATE_BIOSYNTHETIC_PROCESS	GO_PHOSPHATIDYLINOSITOL_3_PHOSPHATE_BIOSYNTHETIC_PROCESS		31	-0.329152	-0.987266	0.439271	0.618251	1	1843	tags=19%, list=16%, signal=23%
GO_REGULATION_OF_CELLULAR_COMPONENT_BIOGENESIS	GO_REGULATION_OF_CELLULAR_COMPONENT_BIOGENESIS		486	-0.216615	-0.986666	0.508811	0.619419	1	2225	tags=21%, list=19%, signal=25%
GO_ORGANONITROGEN_COMPOUND_CATABOLIC_PROCESS	GO_ORGANONITROGEN_COMPOUND_CATABOLIC_PROCESS		203	-0.236396	-0.985907	0.495868	0.620988	1	2414	tags=26%, list=21%, signal=32%
GO_PHAGOSOME_ACIDIFICATION	GO_PHAGOSOME_ACIDIFICATION		20	-0.367949	-0.98472	0.493776	0.623594	1	2444	tags=35%, list=21%, signal=44%
GO_STEM_CELL_DIFFERENTIATION	GO_STEM_CELL_DIFFERENTIATION		93	-0.268008	-0.984559	0.481855	0.623643	1	1636	tags=20%, list=14%, signal=24%
GO_CELLULAR_RESPONSE_TO_RADIATION	GO_CELLULAR_RESPONSE_TO_RADIATION		97	-0.262904	-0.984353	0.488518	0.623817	1	725	tags=9%, list=6%, signal=10%
GO_POSITIVE_REGULATION_OF_CATION_TRANSMEMBRANE_TRANSPORT	GO_POSITIVE_REGULATION_OF_CATION_TRANSMEMBRANE_TRANSPORT		46	-0.295416	-0.98398	0.455852	0.624393	1	1865	tags=26%, list=16%, signal=31%
GO_EMBRYONIC_PLACENTA_DEVELOPMENT	GO_EMBRYONIC_PLACENTA_DEVELOPMENT		47	-0.292156	-0.983368	0.470226	0.625541	1	2022	tags=26%, list=17%, signal=31%
GO_NEGATIVE_REGULATION_OF_DNA_BIOSYNTHETIC_PROCESS	GO_NEGATIVE_REGULATION_OF_DNA_BIOSYNTHETIC_PROCESS		22	-0.346897	-0.98317	0.479167	0.625664	1	485	tags=14%, list=4%, signal=14%
GO_CELL_PROJECTION_CYTOPLASM	GO_CELL_PROJECTION_CYTOPLASM		36	-0.313594	-0.981977	0.484716	0.628274	1	2585	tags=33%, list=22%, signal=43%
GO_MESENCHYMAL_CELL_DIFFERENTIATION	GO_MESENCHYMAL_CELL_DIFFERENTIATION		59	-0.284481	-0.981563	0.510163	0.628956	1	1635	tags=24%, list=14%, signal=27%
GO_B_CELL_PROLIFERATION	GO_B_CELL_PROLIFERATION		17	-0.378156	-0.980461	0.468683	0.631165	1	2937	tags=59%, list=25%, signal=79%
GO_CHANNEL_REGULATOR_ACTIVITY	GO_CHANNEL_REGULATOR_ACTIVITY		58	-0.287538	-0.978998	0.50108	0.63445	1	2662	tags=31%, list=23%, signal=40%
GO_POSITIVE_REGULATION_OF_HOMEOSTATIC_PROCESS	GO_POSITIVE_REGULATION_OF_HOMEOSTATIC_PROCESS		140	-0.245481	-0.977793	0.5	0.637151	1	1017	tags=14%, list=9%, signal=15%
GO_NEGATIVE_REGULATION_OF_GTPASE_ACTIVITY	GO_NEGATIVE_REGULATION_OF_GTPASE_ACTIVITY		29	-0.322458	-0.977792	0.486022	0.636779	1	3255	tags=38%, list=28%, signal=53%
GO_GAMMA_TUBULIN_BINDING	GO_GAMMA_TUBULIN_BINDING		18	-0.367372	-0.977782	0.483607	0.636443	1	49	tags=6%, list=0%, signal=6%
GO_ORGANIC_HYDROXY_COMPOUND_BIOSYNTHETIC_PROCESS	GO_ORGANIC_HYDROXY_COMPOUND_BIOSYNTHETIC_PROCESS		100	-0.25471	-0.977631	0.488372	0.636449	1	2052	tags=22%, list=18%, signal=27%
GO_REGULATION_OF_CYSTEINE_TYPE_ENDOPEPTIDASE_ACTIVITY_INVOLVED_IN_APOPTOTIC_SIGNALING_PATHWAY	GO_REGULATION_OF_CYSTEINE_TYPE_ENDOPEPTIDASE_ACTIVITY_INVOLVED_IN_APOPTOTIC_SIGNALING_PATHWAY		19	-0.354138	-0.977197	0.484144	0.637125	1	1017	tags=21%, list=9%, signal=23%
GO_RESPONSE_TO_VITAMIN	GO_RESPONSE_TO_VITAMIN		60	-0.284262	-0.976489	0.495935	0.638535	1	1615	tags=22%, list=14%, signal=25%
GO_RESPONSE_TO_AMINO_ACID	GO_RESPONSE_TO_AMINO_ACID		71	-0.270894	-0.976478	0.513043	0.638197	1	2018	tags=23%, list=17%, signal=27%
GO_NEGATIVE_REGULATION_OF_INFLAMMATORY_RESPONSE	GO_NEGATIVE_REGULATION_OF_INFLAMMATORY_RESPONSE		53	-0.288959	-0.976319	0.498973	0.638203	1	1483	tags=19%, list=13%, signal=22%
GO_HUMORAL_IMMUNE_RESPONSE_MEDIATED_BY_CIRCULATING_IMMUNOGLOBULIN	GO_HUMORAL_IMMUNE_RESPONSE_MEDIATED_BY_CIRCULATING_IMMUNOGLOBULIN		19	-0.360409	-0.975905	0.520833	0.638858	1	2332	tags=32%, list=20%, signal=39%
GO_MYOTUBE_DIFFERENTIATION	GO_MYOTUBE_DIFFERENTIATION		21	-0.352738	-0.974914	0.492375	0.640956	1	817	tags=14%, list=7%, signal=15%
GO_NEGATIVE_REGULATION_OF_BMP_SIGNALING_PATHWAY	GO_NEGATIVE_REGULATION_OF_BMP_SIGNALING_PATHWAY		16	-0.372733	-0.974886	0.506383	0.640651	1	2812	tags=38%, list=24%, signal=49%
GO_POSITIVE_REGULATION_OF_BIOMINERAL_TISSUE_DEVELOPMENT	GO_POSITIVE_REGULATION_OF_BIOMINERAL_TISSUE_DEVELOPMENT		19	-0.359914	-0.974597	0.493976	0.641027	1	2131	tags=26%, list=18%, signal=32%
GO_RUFFLE_ORGANIZATION	GO_RUFFLE_ORGANIZATION		18	-0.363376	-0.973868	0.474333	0.642475	1	1939	tags=33%, list=17%, signal=40%
GO_POSITIVE_REGULATION_OF_MRNA_PROCESSING	GO_POSITIVE_REGULATION_OF_MRNA_PROCESSING		25	-0.340251	-0.97357	0.5	0.642853	1	552	tags=12%, list=5%, signal=13%
GO_ADHERENS_JUNCTION_ORGANIZATION	GO_ADHERENS_JUNCTION_ORGANIZATION		39	-0.311562	-0.972618	0.507625	0.644868	1	1132	tags=21%, list=10%, signal=23%
GO_CELL_RECOGNITION	GO_CELL_RECOGNITION		60	-0.27774	-0.971806	0.496599	0.64648	1	2824	tags=37%, list=24%, signal=48%
GO_PASSIVE_TRANSMEMBRANE_TRANSPORTER_ACTIVITY	GO_PASSIVE_TRANSMEMBRANE_TRANSPORTER_ACTIVITY		157	-0.238759	-0.971602	0.525275	0.646636	1	1228	tags=17%, list=11%, signal=18%
GO_MORPHOGENESIS_OF_A_POLARIZED_EPITHELIUM	GO_MORPHOGENESIS_OF_A_POLARIZED_EPITHELIUM		18	-0.362367	-0.971563	0.494624	0.64635	1	3447	tags=39%, list=30%, signal=55%
GO_HETEROCHROMATIN	GO_HETEROCHROMATIN		55	-0.289649	-0.971231	0.506383	0.646814	1	607	tags=9%, list=5%, signal=10%
GO_REGULATION_OF_GLUCOSE_TRANSPORT	GO_REGULATION_OF_GLUCOSE_TRANSPORT		67	-0.276115	-0.971222	0.518518	0.646463	1	1209	tags=13%, list=10%, signal=15%
GO_SEX_DIFFERENTIATION	GO_SEX_DIFFERENTIATION		125	-0.248133	-0.970374	0.523504	0.648219	1	1954	tags=21%, list=17%, signal=25%
GO_GLYCEROPHOSPHOLIPID_METABOLIC_PROCESS	GO_GLYCEROPHOSPHOLIPID_METABOLIC_PROCESS		208	-0.232259	-0.97017	0.526667	0.648341	1	2666	tags=25%, list=23%, signal=33%
GO_SCAFFOLD_PROTEIN_BINDING	GO_SCAFFOLD_PROTEIN_BINDING		20	-0.352657	-0.970006	0.48203	0.648404	1	2350	tags=30%, list=20%, signal=38%
GO_TRANSCRIPTION_FROM_RNA_POLYMERASE_II_PROMOTER	GO_TRANSCRIPTION_FROM_RNA_POLYMERASE_II_PROMOTER		463	-0.215014	-0.969162	0.585903	0.650122	1	1489	tags=14%, list=13%, signal=16%
GO_CARBOHYDRATE_TRANSPORTER_ACTIVITY	GO_CARBOHYDRATE_TRANSPORTER_ACTIVITY		19	-0.352065	-0.967562	0.473141	0.653709	1	3166	tags=53%, list=27%, signal=72%
GO_LEUKOCYTE_PROLIFERATION	GO_LEUKOCYTE_PROLIFERATION		51	-0.288448	-0.967471	0.51992	0.653557	1	2290	tags=39%, list=20%, signal=49%
GO_GLYCEROLIPID_BIOSYNTHETIC_PROCESS	GO_GLYCEROLIPID_BIOSYNTHETIC_PROCESS		150	-0.242843	-0.96639	0.557203	0.655959	1	2666	tags=27%, list=23%, signal=34%
GO_OUTFLOW_TRACT_MORPHOGENESIS	GO_OUTFLOW_TRACT_MORPHOGENESIS		25	-0.327026	-0.966346	0.524249	0.655695	1	1601	tags=20%, list=14%, signal=23%
GO_LIPID_BINDING	GO_LIPID_BINDING		368	-0.217924	-0.966296	0.570787	0.65543	1	2319	tags=24%, list=20%, signal=30%
GO_OVULATION_CYCLE_PROCESS	GO_OVULATION_CYCLE_PROCESS		44	-0.300631	-0.966205	0.486815	0.655281	1	1601	tags=20%, list=14%, signal=24%
GO_BONE_REMODELING	GO_BONE_REMODELING		21	-0.343993	-0.965623	0.502049	0.656341	1	1822	tags=33%, list=16%, signal=39%
GO_REGULATION_OF_ANION_TRANSPORT	GO_REGULATION_OF_ANION_TRANSPORT		70	-0.264455	-0.965553	0.530568	0.656136	1	1700	tags=20%, list=15%, signal=23%
GO_CELLULAR_RESPONSE_TO_GLUCOSE_STARVATION	GO_CELLULAR_RESPONSE_TO_GLUCOSE_STARVATION		26	-0.3363	-0.965154	0.520343	0.656768	1	2018	tags=31%, list=17%, signal=37%
GO_B_CELL_HOMEOSTASIS	GO_B_CELL_HOMEOSTASIS		18	-0.362446	-0.965075	0.527542	0.65661	1	1002	tags=17%, list=9%, signal=18%
GO_REGULATION_OF_EPITHELIAL_TO_MESENCHYMAL_TRANSITION	GO_REGULATION_OF_EPITHELIAL_TO_MESENCHYMAL_TRANSITION		36	-0.308598	-0.965018	0.534591	0.656368	1	1636	tags=25%, list=14%, signal=29%
GO_REGULATION_OF_STEROL_TRANSPORT	GO_REGULATION_OF_STEROL_TRANSPORT		21	-0.349279	-0.964863	0.515021	0.656382	1	895	tags=14%, list=8%, signal=15%
GO_CALMODULIN_BINDING	GO_CALMODULIN_BINDING		104	-0.252632	-0.963977	0.566524	0.658342	1	2898	tags=33%, list=25%, signal=43%
GO_MONOCARBOXYLIC_ACID_TRANSPORT	GO_MONOCARBOXYLIC_ACID_TRANSPORT		64	-0.279555	-0.963897	0.532009	0.658177	1	2223	tags=28%, list=19%, signal=35%
GO_NEGATIVE_REGULATION_OF_FATTY_ACID_METABOLIC_PROCESS	GO_NEGATIVE_REGULATION_OF_FATTY_ACID_METABOLIC_PROCESS		16	-0.361142	-0.963737	0.488613	0.658203	1	1262	tags=19%, list=11%, signal=21%
GO_GLIOGENESIS	GO_GLIOGENESIS		89	-0.259316	-0.963246	0.558952	0.659003	1	2984	tags=33%, list=26%, signal=44%
GO_SENSORY_PERCEPTION_OF_LIGHT_STIMULUS	GO_SENSORY_PERCEPTION_OF_LIGHT_STIMULUS		75	-0.266985	-0.963244	0.522976	0.65863	1	1745	tags=21%, list=15%, signal=25%
GO_BINDING_BRIDGING	GO_BINDING_BRIDGING		125	-0.246235	-0.963225	0.542484	0.658299	1	2388	tags=22%, list=21%, signal=27%
GO_POSITIVE_REGULATION_OF_MITOCHONDRION_ORGANIZATION	GO_POSITIVE_REGULATION_OF_MITOCHONDRION_ORGANIZATION		127	-0.246162	-0.962992	0.55042	0.658486	1	1472	tags=18%, list=13%, signal=21%
GO_REGULATION_OF_UBIQUITIN_PROTEIN_LIGASE_ACTIVITY	GO_REGULATION_OF_UBIQUITIN_PROTEIN_LIGASE_ACTIVITY		15	-0.376537	-0.962968	0.490196	0.65817	1	517	tags=13%, list=4%, signal=14%
GO_PROTEIN_KINASE_COMPLEX	GO_PROTEIN_KINASE_COMPLEX		73	-0.267062	-0.962393	0.533898	0.659268	1	1979	tags=22%, list=17%, signal=26%
GO_BRUSH_BORDER_MEMBRANE	GO_BRUSH_BORDER_MEMBRANE		19	-0.357832	-0.961507	0.508097	0.661089	1	2162	tags=37%, list=19%, signal=45%
GO_SUGAR_TRANSMEMBRANE_TRANSPORTER_ACTIVITY	GO_SUGAR_TRANSMEMBRANE_TRANSPORTER_ACTIVITY		18	-0.356566	-0.96114	0.510504	0.661621	1	3166	tags=56%, list=27%, signal=76%
GO_REGULATION_OF_DENDRITE_MORPHOGENESIS	GO_REGULATION_OF_DENDRITE_MORPHOGENESIS		40	-0.302056	-0.960867	0.517167	0.661919	1	647	tags=8%, list=6%, signal=8%
GO_RIBOSOME_BINDING	GO_RIBOSOME_BINDING		35	-0.310475	-0.960229	0.536325	0.663113	1	1848	tags=20%, list=16%, signal=24%
GO_HYDROGEN_TRANSPORT	GO_HYDROGEN_TRANSPORT		96	-0.25738	-0.959875	0.558704	0.663646	1	1561	tags=18%, list=13%, signal=20%
GO_NUCLEOSIDE_PHOSPHATE_CATABOLIC_PROCESS	GO_NUCLEOSIDE_PHOSPHATE_CATABOLIC_PROCESS		49	-0.285827	-0.959439	0.537415	0.664321	1	1595	tags=20%, list=14%, signal=24%
GO_REGULATION_OF_RHO_PROTEIN_SIGNAL_TRANSDUCTION	GO_REGULATION_OF_RHO_PROTEIN_SIGNAL_TRANSDUCTION		63	-0.274712	-0.959185	0.538947	0.664581	1	1944	tags=22%, list=17%, signal=27%
GO_PHOSPHATIDYLINOSITOL_BINDING	GO_PHOSPHATIDYLINOSITOL_BINDING		140	-0.240818	-0.958108	0.54661	0.66691	1	2697	tags=30%, list=23%, signal=39%
GO_CYTOSOLIC_TRANSPORT	GO_CYTOSOLIC_TRANSPORT		146	-0.239989	-0.957907	0.546667	0.667047	1	2137	tags=19%, list=18%, signal=23%
GO_IN_UTERO_EMBRYONIC_DEVELOPMENT	GO_IN_UTERO_EMBRYONIC_DEVELOPMENT		209	-0.229048	-0.957844	0.575	0.666815	1	2420	tags=25%, list=21%, signal=31%
GO_PHOSPHATIDYLINOSITOL_BIOSYNTHETIC_PROCESS	GO_PHOSPHATIDYLINOSITOL_BIOSYNTHETIC_PROCESS		97	-0.25434	-0.956895	0.522013	0.668737	1	2024	tags=20%, list=17%, signal=24%
GO_NUCLEAR_TRANSCRIPTIONAL_REPRESSOR_COMPLEX	GO_NUCLEAR_TRANSCRIPTIONAL_REPRESSOR_COMPLEX		19	-0.353313	-0.95681	0.505133	0.668557	1	1832	tags=26%, list=16%, signal=31%
GO_REGULATION_OF_ANTIGEN_RECEPTOR_MEDIATED_SIGNALING_PATHWAY	GO_REGULATION_OF_ANTIGEN_RECEPTOR_MEDIATED_SIGNALING_PATHWAY		33	-0.316998	-0.956581	0.517034	0.668774	1	2513	tags=30%, list=22%, signal=39%
GO_HYDROLASE_ACTIVITY_ACTING_ON_ESTER_BONDS	GO_HYDROLASE_ACTIVITY_ACTING_ON_ESTER_BONDS		483	-0.210841	-0.95634	0.625866	0.669004	1	1386	tags=13%, list=12%, signal=15%
GO_NEUROTRANSMITTER_TRANSPORT	GO_NEUROTRANSMITTER_TRANSPORT		59	-0.279802	-0.955931	0.556723	0.669606	1	1043	tags=14%, list=9%, signal=15%
GO_NEGATIVE_REGULATION_OF_PROTEIN_LOCALIZATION_TO_CELL_PERIPHERY	GO_NEGATIVE_REGULATION_OF_PROTEIN_LOCALIZATION_TO_CELL_PERIPHERY		16	-0.376404	-0.955356	0.5	0.670704	1	2758	tags=38%, list=24%, signal=49%
GO_POSITIVE_REGULATION_OF_FAT_CELL_DIFFERENTIATION	GO_POSITIVE_REGULATION_OF_FAT_CELL_DIFFERENTIATION		26	-0.328131	-0.954632	0.519348	0.672103	1	1977	tags=27%, list=17%, signal=32%
GO_REGULATION_OF_PROTEIN_POLYMERIZATION	GO_REGULATION_OF_PROTEIN_POLYMERIZATION		120	-0.245484	-0.953706	0.56875	0.674009	1	1822	tags=19%, list=16%, signal=23%
GO_REGULATION_OF_LIPASE_ACTIVITY	GO_REGULATION_OF_LIPASE_ACTIVITY		39	-0.296723	-0.953553	0.545842	0.674021	1	1222	tags=26%, list=11%, signal=29%
GO_CORTICAL_CYTOSKELETON_ORGANIZATION	GO_CORTICAL_CYTOSKELETON_ORGANIZATION		27	-0.333041	-0.953489	0.540839	0.673807	1	1815	tags=26%, list=16%, signal=31%
GO_CELL_CELL_JUNCTION_ASSEMBLY	GO_CELL_CELL_JUNCTION_ASSEMBLY		45	-0.290108	-0.9524	0.523013	0.676145	1	2204	tags=29%, list=19%, signal=36%
GO_POSITIVE_REGULATION_OF_STEM_CELL_DIFFERENTIATION	GO_POSITIVE_REGULATION_OF_STEM_CELL_DIFFERENTIATION		29	-0.324483	-0.95239	0.497976	0.675789	1	1614	tags=24%, list=14%, signal=28%
GO_REGULATION_OF_NEURONAL_SYNAPTIC_PLASTICITY	GO_REGULATION_OF_NEURONAL_SYNAPTIC_PLASTICITY		17	-0.366168	-0.950647	0.515151	0.679758	1	2137	tags=29%, list=18%, signal=36%
GO_POSITIVE_REGULATION_OF_PROTEIN_POLYMERIZATION	GO_POSITIVE_REGULATION_OF_PROTEIN_POLYMERIZATION		63	-0.276204	-0.950415	0.540856	0.679967	1	2211	tags=22%, list=19%, signal=27%
GO_NEGATIVE_REGULATION_OF_DEPHOSPHORYLATION	GO_NEGATIVE_REGULATION_OF_DEPHOSPHORYLATION		47	-0.283457	-0.949661	0.553419	0.681494	1	3457	tags=47%, list=30%, signal=66%
GO_MESENCHYME_DEVELOPMENT	GO_MESENCHYME_DEVELOPMENT		76	-0.259893	-0.949645	0.537832	0.68115	1	1466	tags=20%, list=13%, signal=22%
GO_REGULATION_OF_NOTCH_SIGNALING_PATHWAY	GO_REGULATION_OF_NOTCH_SIGNALING_PATHWAY		42	-0.292681	-0.949638	0.550102	0.680778	1	1290	tags=21%, list=11%, signal=24%
GO_SOMATODENDRITIC_COMPARTMENT	GO_SOMATODENDRITIC_COMPARTMENT		326	-0.214148	-0.949467	0.617257	0.680819	1	1856	tags=17%, list=16%, signal=20%
GO_NEURAL_TUBE_DEVELOPMENT	GO_NEURAL_TUBE_DEVELOPMENT		89	-0.254802	-0.948622	0.552017	0.682544	1	1954	tags=18%, list=17%, signal=21%
GO_MORPHOGENESIS_OF_EMBRYONIC_EPITHELIUM	GO_MORPHOGENESIS_OF_EMBRYONIC_EPITHELIUM		79	-0.260739	-0.948404	0.568627	0.682689	1	1870	tags=19%, list=16%, signal=22%
GO_MESONEPHRIC_TUBULE_MORPHOGENESIS	GO_MESONEPHRIC_TUBULE_MORPHOGENESIS		21	-0.336958	-0.947686	0.529279	0.68415	1	2512	tags=38%, list=22%, signal=49%
GO_PROTEIN_KINASE_A_BINDING	GO_PROTEIN_KINASE_A_BINDING		27	-0.324694	-0.947466	0.533195	0.684283	1	1188	tags=22%, list=10%, signal=25%
GO_PROTEIN_SERINE_THREONINE_KINASE_ACTIVITY	GO_PROTEIN_SERINE_THREONINE_KINASE_ACTIVITY		318	-0.217072	-0.94736	0.631929	0.684166	1	2282	tags=22%, list=20%, signal=26%
GO_CELL_SUBSTRATE_ADHESION	GO_CELL_SUBSTRATE_ADHESION		91	-0.253115	-0.945982	0.587719	0.687216	1	1458	tags=15%, list=13%, signal=17%
GO_SPINDLE_LOCALIZATION	GO_SPINDLE_LOCALIZATION		30	-0.307769	-0.944812	0.565311	0.68968	1	1808	tags=30%, list=16%, signal=35%
GO_HEAD_MORPHOGENESIS	GO_HEAD_MORPHOGENESIS		19	-0.359707	-0.943897	0.529787	0.69159	1	1627	tags=32%, list=14%, signal=37%
GO_BICELLULAR_TIGHT_JUNCTION_ASSEMBLY	GO_BICELLULAR_TIGHT_JUNCTION_ASSEMBLY		19	-0.345001	-0.943394	0.523207	0.692486	1	2204	tags=32%, list=19%, signal=39%
GO_POSITIVE_REGULATION_OF_CALCIUM_ION_TRANSMEMBRANE_TRANSPORT	GO_POSITIVE_REGULATION_OF_CALCIUM_ION_TRANSMEMBRANE_TRANSPORT		33	-0.308131	-0.943179	0.546185	0.692628	1	2812	tags=36%, list=24%, signal=48%
GO_DENDRITE_MORPHOGENESIS	GO_DENDRITE_MORPHOGENESIS		19	-0.352563	-0.942787	0.519231	0.693203	1	236	tags=11%, list=2%, signal=11%
GO_PROTON_TRANSPORTING_V_TYPE_ATPASE_COMPLEX	GO_PROTON_TRANSPORTING_V_TYPE_ATPASE_COMPLEX		17	-0.360723	-0.942391	0.526539	0.693796	1	2243	tags=29%, list=19%, signal=36%
GO_PROTON_TRANSPORTING_TWO_SECTOR_ATPASE_COMPLEX_PROTON_TRANSPORTING_DOMAIN	GO_PROTON_TRANSPORTING_TWO_SECTOR_ATPASE_COMPLEX_PROTON_TRANSPORTING_DOMAIN		17	-0.355466	-0.942179	0.528634	0.693962	1	542	tags=18%, list=5%, signal=18%
GO_ACETYL_COA_METABOLIC_PROCESS	GO_ACETYL_COA_METABOLIC_PROCESS		18	-0.34972	-0.94153	0.548523	0.695226	1	2414	tags=33%, list=21%, signal=42%
GO_GLYCEROLIPID_CATABOLIC_PROCESS	GO_GLYCEROLIPID_CATABOLIC_PROCESS		18	-0.344885	-0.940316	0.534591	0.697847	1	2017	tags=28%, list=17%, signal=34%
GO_DEVELOPMENTAL_GROWTH_INVOLVED_IN_MORPHOGENESIS	GO_DEVELOPMENTAL_GROWTH_INVOLVED_IN_MORPHOGENESIS		51	-0.281248	-0.939621	0.579065	0.699214	1	3111	tags=37%, list=27%, signal=51%
GO_INSULIN_RECEPTOR_BINDING	GO_INSULIN_RECEPTOR_BINDING		20	-0.343103	-0.939574	0.557652	0.698932	1	853	tags=20%, list=7%, signal=22%
GO_NEUROMUSCULAR_PROCESS	GO_NEUROMUSCULAR_PROCESS		38	-0.301316	-0.939397	0.54013	0.698963	1	2334	tags=29%, list=20%, signal=36%
GO_REGULATION_OF_CELL_PROJECTION_ASSEMBLY	GO_REGULATION_OF_CELL_PROJECTION_ASSEMBLY		101	-0.250231	-0.938969	0.590708	0.699679	1	1951	tags=21%, list=17%, signal=25%
GO_RHYTHMIC_PROCESS	GO_RHYTHMIC_PROCESS		173	-0.232087	-0.938871	0.609914	0.699509	1	1030	tags=12%, list=9%, signal=13%
GO_POSITIVE_REGULATION_OF_MUSCLE_CELL_DIFFERENTIATION	GO_POSITIVE_REGULATION_OF_MUSCLE_CELL_DIFFERENTIATION		48	-0.28242	-0.93856	0.558386	0.699883	1	1542	tags=17%, list=13%, signal=19%
GO_CARDIAC_MUSCLE_TISSUE_DEVELOPMENT	GO_CARDIAC_MUSCLE_TISSUE_DEVELOPMENT		69	-0.261107	-0.938453	0.561024	0.699783	1	1722	tags=19%, list=15%, signal=22%
GO_CLATHRIN_ADAPTOR_COMPLEX	GO_CLATHRIN_ADAPTOR_COMPLEX		24	-0.324792	-0.937846	0.553719	0.700936	1	2261	tags=33%, list=20%, signal=41%
GO_ENDOSOME_TO_LYSOSOME_TRANSPORT	GO_ENDOSOME_TO_LYSOSOME_TRANSPORT		35	-0.30085	-0.937622	0.558577	0.701102	1	3034	tags=31%, list=26%, signal=42%
GO_HOMOTYPIC_CELL_CELL_ADHESION	GO_HOMOTYPIC_CELL_CELL_ADHESION		31	-0.311035	-0.936939	0.580169	0.702396	1	2269	tags=32%, list=20%, signal=40%
GO_REGULATION_OF_PROTEIN_OLIGOMERIZATION	GO_REGULATION_OF_PROTEIN_OLIGOMERIZATION		20	-0.347398	-0.936848	0.539554	0.702223	1	1328	tags=30%, list=11%, signal=34%
GO_CILIARY_TRANSITION_ZONE	GO_CILIARY_TRANSITION_ZONE		19	-0.34127	-0.936574	0.546535	0.702523	1	3145	tags=53%, list=27%, signal=72%
GO_RECEPTOR_INTERNALIZATION	GO_RECEPTOR_INTERNALIZATION		30	-0.310206	-0.935511	0.544898	0.704795	1	247	tags=10%, list=2%, signal=10%
GO_REGULATION_OF_RAS_PROTEIN_SIGNAL_TRANSDUCTION	GO_REGULATION_OF_RAS_PROTEIN_SIGNAL_TRANSDUCTION		109	-0.244167	-0.932897	0.60307	0.710921	1	1785	tags=21%, list=15%, signal=25%
GO_DEATH_RECEPTOR_ACTIVITY	GO_DEATH_RECEPTOR_ACTIVITY		21	-0.333896	-0.932377	0.56616	0.71186	1	582	tags=19%, list=5%, signal=20%
GO_REGULATION_OF_CHONDROCYTE_DIFFERENTIATION	GO_REGULATION_OF_CHONDROCYTE_DIFFERENTIATION		15	-0.362269	-0.932376	0.534836	0.711468	1	1184	tags=20%, list=10%, signal=22%
GO_POLYOL_METABOLIC_PROCESS	GO_POLYOL_METABOLIC_PROCESS		66	-0.266945	-0.932156	0.613169	0.711641	1	2168	tags=23%, list=19%, signal=28%
GO_CELLULAR_RESPONSE_TO_RETINOIC_ACID	GO_CELLULAR_RESPONSE_TO_RETINOIC_ACID		25	-0.323172	-0.931333	0.563601	0.713191	1	2610	tags=40%, list=23%, signal=52%
GO_CYTOPLASMIC_SEQUESTERING_OF_PROTEIN	GO_CYTOPLASMIC_SEQUESTERING_OF_PROTEIN		31	-0.306235	-0.930287	0.528662	0.715368	1	788	tags=16%, list=7%, signal=17%
GO_POSITIVE_REGULATION_OF_REGULATED_SECRETORY_PATHWAY	GO_POSITIVE_REGULATION_OF_REGULATED_SECRETORY_PATHWAY		24	-0.33058	-0.930016	0.574257	0.715651	1	853	tags=17%, list=7%, signal=18%
GO_REGULATION_OF_DEFENSE_RESPONSE_TO_VIRUS_BY_VIRUS	GO_REGULATION_OF_DEFENSE_RESPONSE_TO_VIRUS_BY_VIRUS		25	-0.326135	-0.929982	0.589691	0.715337	1	883	tags=20%, list=8%, signal=22%
GO_RESPONSE_TO_NICOTINE	GO_RESPONSE_TO_NICOTINE		26	-0.321783	-0.929952	0.560606	0.715026	1	1615	tags=23%, list=14%, signal=27%
GO_AMINE_METABOLIC_PROCESS	GO_AMINE_METABOLIC_PROCESS		70	-0.259304	-0.929909	0.59205	0.714742	1	396	tags=10%, list=3%, signal=10%
GO_EXTRINSIC_APOPTOTIC_SIGNALING_PATHWAY_VIA_DEATH_DOMAIN_RECEPTORS	GO_EXTRINSIC_APOPTOTIC_SIGNALING_PATHWAY_VIA_DEATH_DOMAIN_RECEPTORS		34	-0.304762	-0.92981	0.550936	0.714574	1	1002	tags=12%, list=9%, signal=13%
GO_DENDRITIC_SHAFT	GO_DENDRITIC_SHAFT		18	-0.349885	-0.929013	0.57438	0.716143	1	3518	tags=56%, list=30%, signal=80%
GO_PROTEASOME_BINDING	GO_PROTEASOME_BINDING		15	-0.362703	-0.928893	0.559006	0.716046	1	1054	tags=20%, list=9%, signal=22%
GO_LIGASE_ACTIVITY	GO_LIGASE_ACTIVITY		318	-0.212465	-0.928664	0.751163	0.71624	1	2076	tags=18%, list=18%, signal=22%
GO_COP9_SIGNALOSOME	GO_COP9_SIGNALOSOME		30	-0.31493	-0.928122	0.553571	0.717191	1	891	tags=17%, list=8%, signal=18%
GO_BICARBONATE_TRANSPORT	GO_BICARBONATE_TRANSPORT		15	-0.366292	-0.927996	0.561077	0.717092	1	1356	tags=33%, list=12%, signal=38%
GO_CD4_POSITIVE_ALPHA_BETA_T_CELL_ACTIVATION	GO_CD4_POSITIVE_ALPHA_BETA_T_CELL_ACTIVATION		26	-0.315415	-0.927685	0.560484	0.717469	1	530	tags=15%, list=5%, signal=16%
GO_SYNTAXIN_BINDING	GO_SYNTAXIN_BINDING		56	-0.273259	-0.926475	0.592213	0.720048	1	1439	tags=16%, list=12%, signal=18%
GO_NEGATIVE_REGULATION_OF_STEM_CELL_DIFFERENTIATION	GO_NEGATIVE_REGULATION_OF_STEM_CELL_DIFFERENTIATION		21	-0.338685	-0.926466	0.548936	0.719678	1	1791	tags=24%, list=15%, signal=28%
GO_ORGANIC_HYDROXY_COMPOUND_TRANSMEMBRANE_TRANSPORTER_ACTIVITY	GO_ORGANIC_HYDROXY_COMPOUND_TRANSMEMBRANE_TRANSPORTER_ACTIVITY		18	-0.348819	-0.926204	0.542977	0.719908	1	2772	tags=33%, list=24%, signal=44%
GO_REGULATION_OF_LYMPHOCYTE_APOPTOTIC_PROCESS	GO_REGULATION_OF_LYMPHOCYTE_APOPTOTIC_PROCESS		41	-0.285649	-0.924793	0.597802	0.722914	1	2160	tags=39%, list=19%, signal=48%
GO_PROTEIN_SERINE_THREONINE_TYROSINE_KINASE_ACTIVITY	GO_PROTEIN_SERINE_THREONINE_TYROSINE_KINASE_ACTIVITY		31	-0.308281	-0.924785	0.59448	0.722543	1	3116	tags=39%, list=27%, signal=53%
GO_REGULATION_OF_SMOOTH_MUSCLE_CELL_MIGRATION	GO_REGULATION_OF_SMOOTH_MUSCLE_CELL_MIGRATION		26	-0.314222	-0.9243	0.569937	0.723342	1	2599	tags=35%, list=22%, signal=45%
GO_REGULATION_OF_ENDOCRINE_PROCESS	GO_REGULATION_OF_ENDOCRINE_PROCESS		21	-0.334515	-0.924276	0.569388	0.723001	1	2660	tags=29%, list=23%, signal=37%
GO_NEGATIVE_REGULATION_OF_DEFENSE_RESPONSE_TO_VIRUS	GO_NEGATIVE_REGULATION_OF_DEFENSE_RESPONSE_TO_VIRUS		15	-0.367145	-0.924027	0.572062	0.723263	1	767	tags=20%, list=7%, signal=21%
GO_ENDOTHELIAL_CELL_DEVELOPMENT	GO_ENDOTHELIAL_CELL_DEVELOPMENT		30	-0.303828	-0.922436	0.598344	0.726761	1	647	tags=13%, list=6%, signal=14%
GO_MIDBRAIN_DEVELOPMENT	GO_MIDBRAIN_DEVELOPMENT		52	-0.268381	-0.922085	0.595661	0.727256	1	665	tags=12%, list=6%, signal=12%
GO_MULTI_ORGANISM_ORGANELLE_ORGANIZATION	GO_MULTI_ORGANISM_ORGANELLE_ORGANIZATION		23	-0.330824	-0.920504	0.587879	0.730771	1	1293	tags=22%, list=11%, signal=24%
GO_OVULATION_CYCLE	GO_OVULATION_CYCLE		55	-0.268003	-0.920428	0.602911	0.730563	1	522	tags=11%, list=5%, signal=11%
GO_MUSCLE_SYSTEM_PROCESS	GO_MUSCLE_SYSTEM_PROCESS		134	-0.230213	-0.919273	0.656842	0.732904	1	2326	tags=25%, list=20%, signal=31%
GO_MONOCARBOXYLIC_ACID_BINDING	GO_MONOCARBOXYLIC_ACID_BINDING		29	-0.311463	-0.918638	0.572614	0.734085	1	2663	tags=31%, list=23%, signal=40%
GO_PROTEIN_K48_LINKED_UBIQUITINATION	GO_PROTEIN_K48_LINKED_UBIQUITINATION		41	-0.293729	-0.918169	0.596273	0.734807	1	1769	tags=20%, list=15%, signal=23%
GO_COENZYME_BIOSYNTHETIC_PROCESS	GO_COENZYME_BIOSYNTHETIC_PROCESS		92	-0.24194	-0.917793	0.657948	0.735297	1	1440	tags=14%, list=12%, signal=16%
GO_REGULATION_OF_MITOPHAGY	GO_REGULATION_OF_MITOPHAGY		38	-0.287207	-0.916514	0.562874	0.738006	1	1692	tags=21%, list=15%, signal=25%
GO_PROTEASOMAL_PROTEIN_CATABOLIC_PROCESS	GO_PROTEASOMAL_PROTEIN_CATABOLIC_PROCESS		229	-0.218115	-0.914755	0.728261	0.741867	1	1460	tags=14%, list=13%, signal=15%
GO_SPERM_MOTILITY	GO_SPERM_MOTILITY		16	-0.352601	-0.913577	0.593407	0.744277	1	1537	tags=19%, list=13%, signal=22%
GO_PODOSOME	GO_PODOSOME		18	-0.342732	-0.913445	0.577253	0.744196	1	1265	tags=17%, list=11%, signal=19%
GO_ENHANCER_BINDING	GO_ENHANCER_BINDING		65	-0.258377	-0.913182	0.647312	0.744442	1	1977	tags=25%, list=17%, signal=30%
GO_LYMPHOCYTE_MEDIATED_IMMUNITY	GO_LYMPHOCYTE_MEDIATED_IMMUNITY		77	-0.249438	-0.912657	0.644491	0.745302	1	2352	tags=26%, list=20%, signal=32%
GO_REGULATION_OF_SPROUTING_ANGIOGENESIS	GO_REGULATION_OF_SPROUTING_ANGIOGENESIS		21	-0.329105	-0.91207	0.582305	0.746349	1	2283	tags=29%, list=20%, signal=36%
GO_INTRAMOLECULAR_OXIDOREDUCTASE_ACTIVITY	GO_INTRAMOLECULAR_OXIDOREDUCTASE_ACTIVITY		37	-0.286275	-0.911931	0.604027	0.74627	1	1270	tags=14%, list=11%, signal=15%
GO_PLACENTA_BLOOD_VESSEL_DEVELOPMENT	GO_PLACENTA_BLOOD_VESSEL_DEVELOPMENT		19	-0.339466	-0.911805	0.583158	0.746174	1	1780	tags=21%, list=15%, signal=25%
GO_NEGATIVE_REGULATION_OF_WNT_SIGNALING_PATHWAY	GO_NEGATIVE_REGULATION_OF_WNT_SIGNALING_PATHWAY		123	-0.234586	-0.9117	0.662526	0.746025	1	1274	tags=12%, list=11%, signal=14%
GO_MULTICELLULAR_ORGANISMAL_RESPONSE_TO_STRESS	GO_MULTICELLULAR_ORGANISMAL_RESPONSE_TO_STRESS		27	-0.313761	-0.911241	0.598802	0.746741	1	1352	tags=19%, list=12%, signal=21%
GO_GENERATION_OF_PRECURSOR_METABOLITES_AND_ENERGY	GO_GENERATION_OF_PRECURSOR_METABOLITES_AND_ENERGY		214	-0.216891	-0.910771	0.702273	0.747444	1	2292	tags=25%, list=20%, signal=31%
GO_VACUOLE_ORGANIZATION	GO_VACUOLE_ORGANIZATION		139	-0.230725	-0.910676	0.668172	0.747261	1	1500	tags=17%, list=13%, signal=20%
GO_PHOSPHATIDYLSERINE_BINDING	GO_PHOSPHATIDYLSERINE_BINDING		17	-0.346589	-0.910659	0.569002	0.746906	1	3227	tags=29%, list=28%, signal=41%
GO_GOLGI_LUMEN	GO_GOLGI_LUMEN		23	-0.328411	-0.910337	0.591703	0.747244	1	3113	tags=35%, list=27%, signal=47%
GO_HEPARIN_BINDING	GO_HEPARIN_BINDING		47	-0.279299	-0.909424	0.60888	0.749029	1	888	tags=13%, list=8%, signal=14%
GO_CALMODULIN_DEPENDENT_PROTEIN_KINASE_ACTIVITY	GO_CALMODULIN_DEPENDENT_PROTEIN_KINASE_ACTIVITY		20	-0.327811	-0.908809	0.583162	0.750083	1	2452	tags=40%, list=21%, signal=51%
GO_90S_PRERIBOSOME	GO_90S_PRERIBOSOME		22	-0.324063	-0.908786	0.579167	0.749732	1	1151	tags=18%, list=10%, signal=20%
GO_HISTONE_PHOSPHORYLATION	GO_HISTONE_PHOSPHORYLATION		19	-0.336934	-0.908089	0.577154	0.751006	1	1095	tags=16%, list=9%, signal=17%
GO_WNT_SIGNALING_PATHWAY_CALCIUM_MODULATING_PATHWAY	GO_WNT_SIGNALING_PATHWAY_CALCIUM_MODULATING_PATHWAY		22	-0.325689	-0.907524	0.591667	0.751915	1	1642	tags=23%, list=14%, signal=26%
GO_PHOTOPERIODISM	GO_PHOTOPERIODISM		16	-0.347132	-0.9074	0.595289	0.751805	1	345	tags=13%, list=3%, signal=13%
GO_POSITIVE_REGULATION_OF_CYSTEINE_TYPE_ENDOPEPTIDASE_ACTIVITY_INVOLVED_IN_APOPTOTIC_SIGNALING_PATHWAY	GO_POSITIVE_REGULATION_OF_CYSTEINE_TYPE_ENDOPEPTIDASE_ACTIVITY_INVOLVED_IN_APOPTOTIC_SIGNALING_PATHWAY		15	-0.361167	-0.907306	0.577586	0.75163	1	1017	tags=20%, list=9%, signal=22%
GO_MICROBODY	GO_MICROBODY		100	-0.239041	-0.906481	0.666667	0.753191	1	1132	tags=15%, list=10%, signal=16%
GO_POSITIVE_REGULATION_OF_PROTEIN_DEACETYLATION	GO_POSITIVE_REGULATION_OF_PROTEIN_DEACETYLATION		16	-0.349863	-0.906019	0.581443	0.753881	1	2123	tags=38%, list=18%, signal=46%
GO_REGULATION_OF_SMOOTH_MUSCLE_CONTRACTION	GO_REGULATION_OF_SMOOTH_MUSCLE_CONTRACTION		26	-0.305347	-0.905867	0.601227	0.75386	1	1483	tags=19%, list=13%, signal=22%
GO_CELLULAR_RESPONSE_TO_OXYGEN_LEVELS	GO_CELLULAR_RESPONSE_TO_OXYGEN_LEVELS		101	-0.242043	-0.9056	0.658747	0.754084	1	1754	tags=16%, list=15%, signal=19%
GO_POSITIVE_REGULATION_OF_ATPASE_ACTIVITY	GO_POSITIVE_REGULATION_OF_ATPASE_ACTIVITY		33	-0.294328	-0.905575	0.625523	0.75374	1	305	tags=9%, list=3%, signal=9%
GO_CARGO_RECEPTOR_ACTIVITY	GO_CARGO_RECEPTOR_ACTIVITY		21	-0.330893	-0.9055	0.602564	0.753529	1	840	tags=14%, list=7%, signal=15%
GO_ENTRAINMENT_OF_CIRCADIAN_CLOCK_BY_PHOTOPERIOD	GO_ENTRAINMENT_OF_CIRCADIAN_CLOCK_BY_PHOTOPERIOD		15	-0.357122	-0.904631	0.587302	0.755211	1	345	tags=13%, list=3%, signal=14%
GO_PHOSPHATIDYLCHOLINE_METABOLIC_PROCESS	GO_PHOSPHATIDYLCHOLINE_METABOLIC_PROCESS		32	-0.294122	-0.904227	0.605206	0.755749	1	269	tags=9%, list=2%, signal=10%
GO_NEGATIVE_REGULATION_OF_CYTOKINE_BIOSYNTHETIC_PROCESS	GO_NEGATIVE_REGULATION_OF_CYTOKINE_BIOSYNTHETIC_PROCESS		18	-0.334359	-0.903866	0.605372	0.75622	1	3535	tags=56%, list=31%, signal=80%
GO_REGULATION_OF_PH	GO_REGULATION_OF_PH		52	-0.269172	-0.903524	0.634249	0.756598	1	1002	tags=15%, list=9%, signal=17%
GO_RNA_POLYMERASE_CORE_ENZYME_BINDING	GO_RNA_POLYMERASE_CORE_ENZYME_BINDING		18	-0.341774	-0.902617	0.610442	0.75835	1	87	tags=6%, list=1%, signal=6%
GO_EPHRIN_RECEPTOR_BINDING	GO_EPHRIN_RECEPTOR_BINDING		15	-0.345217	-0.901407	0.607438	0.760793	1	3277	tags=53%, list=28%, signal=74%
GO_NEGATIVE_REGULATION_OF_MUSCLE_CELL_APOPTOTIC_PROCESS	GO_NEGATIVE_REGULATION_OF_MUSCLE_CELL_APOPTOTIC_PROCESS		18	-0.344991	-0.901327	0.601732	0.760576	1	2313	tags=33%, list=20%, signal=42%
GO_REGULATION_OF_GLUCOSE_METABOLIC_PROCESS	GO_REGULATION_OF_GLUCOSE_METABOLIC_PROCESS		60	-0.258335	-0.900917	0.645923	0.761108	1	961	tags=13%, list=8%, signal=14%
GO_REGULATION_OF_CELL_MATRIX_ADHESION	GO_REGULATION_OF_CELL_MATRIX_ADHESION		55	-0.266076	-0.900864	0.648305	0.760832	1	2225	tags=24%, list=19%, signal=29%
GO_ENDOTHELIUM_DEVELOPMENT	GO_ENDOTHELIUM_DEVELOPMENT		56	-0.266676	-0.900342	0.660377	0.761632	1	1525	tags=18%, list=13%, signal=20%
GO_SINGLE_ORGANISM_MEMBRANE_BUDDING	GO_SINGLE_ORGANISM_MEMBRANE_BUDDING		62	-0.2571	-0.899587	0.656587	0.763014	1	2118	tags=24%, list=18%, signal=29%
GO_REGULATION_OF_TOR_SIGNALING	GO_REGULATION_OF_TOR_SIGNALING		53	-0.263117	-0.899052	0.62578	0.763814	1	1943	tags=25%, list=17%, signal=29%
GO_AMINOGLYCAN_CATABOLIC_PROCESS	GO_AMINOGLYCAN_CATABOLIC_PROCESS		31	-0.301441	-0.898698	0.628803	0.764253	1	2206	tags=29%, list=19%, signal=36%
GO_CELL_GROWTH	GO_CELL_GROWTH		75	-0.251554	-0.898386	0.672165	0.764541	1	2243	tags=24%, list=19%, signal=30%
GO_LABYRINTHINE_LAYER_DEVELOPMENT	GO_LABYRINTHINE_LAYER_DEVELOPMENT		25	-0.313981	-0.897966	0.638581	0.765076	1	1821	tags=28%, list=16%, signal=33%
GO_HISTONE_METHYLTRANSFERASE_COMPLEX	GO_HISTONE_METHYLTRANSFERASE_COMPLEX		61	-0.258628	-0.897715	0.670125	0.765258	1	2089	tags=23%, list=18%, signal=28%
GO_REGULATION_OF_MITOCHONDRIAL_MEMBRANE_POTENTIAL	GO_REGULATION_OF_MITOCHONDRIAL_MEMBRANE_POTENTIAL		41	-0.281172	-0.897682	0.63125	0.76493	1	485	tags=10%, list=4%, signal=10%
GO_RETROGRADE_TRANSPORT_VESICLE_RECYCLING_WITHIN_GOLGI	GO_RETROGRADE_TRANSPORT_VESICLE_RECYCLING_WITHIN_GOLGI		19	-0.338136	-0.897437	0.620172	0.765088	1	3724	tags=53%, list=32%, signal=77%
GO_COMPLEMENT_ACTIVATION	GO_COMPLEMENT_ACTIVATION		15	-0.360948	-0.89693	0.584746	0.76589	1	3443	tags=47%, list=30%, signal=66%
GO_REGULATION_OF_INTRACELLULAR_ESTROGEN_RECEPTOR_SIGNALING_PATHWAY	GO_REGULATION_OF_INTRACELLULAR_ESTROGEN_RECEPTOR_SIGNALING_PATHWAY		19	-0.32819	-0.896915	0.6125	0.765522	1	1452	tags=21%, list=13%, signal=24%
GO_HISTONE_KINASE_ACTIVITY	GO_HISTONE_KINASE_ACTIVITY		16	-0.347161	-0.896301	0.565306	0.766566	1	636	tags=13%, list=5%, signal=13%
GO_PLASMA_MEMBRANE_RAFT	GO_PLASMA_MEMBRANE_RAFT		51	-0.262873	-0.896062	0.648472	0.766692	1	2309	tags=29%, list=20%, signal=37%
GO_POSITIVE_REGULATION_OF_OSSIFICATION	GO_POSITIVE_REGULATION_OF_OSSIFICATION		44	-0.275818	-0.896006	0.636743	0.766426	1	2164	tags=25%, list=19%, signal=31%
GO_PLATELET_AGGREGATION	GO_PLATELET_AGGREGATION		26	-0.302325	-0.895146	0.609856	0.767975	1	2055	tags=31%, list=18%, signal=37%
GO_NEURON_RECOGNITION	GO_NEURON_RECOGNITION		15	-0.345743	-0.894407	0.613108	0.769295	1	2824	tags=60%, list=24%, signal=79%
GO_ORGANOPHOSPHATE_ESTER_TRANSMEMBRANE_TRANSPORTER_ACTIVITY	GO_ORGANOPHOSPHATE_ESTER_TRANSMEMBRANE_TRANSPORTER_ACTIVITY		20	-0.32126	-0.893747	0.60625	0.770351	1	2766	tags=30%, list=24%, signal=39%
GO_MEMORY	GO_MEMORY		49	-0.270664	-0.893635	0.629555	0.770198	1	1088	tags=12%, list=9%, signal=13%
GO_SH3_SH2_ADAPTOR_ACTIVITY	GO_SH3_SH2_ADAPTOR_ACTIVITY		42	-0.276542	-0.893328	0.632696	0.770546	1	1948	tags=21%, list=17%, signal=26%
GO_ACTIN_FILAMENT_BASED_PROCESS	GO_ACTIN_FILAMENT_BASED_PROCESS		277	-0.205721	-0.892233	0.829374	0.77262	1	2446	tags=23%, list=21%, signal=29%
GO_RHO_GUANYL_NUCLEOTIDE_EXCHANGE_FACTOR_ACTIVITY	GO_RHO_GUANYL_NUCLEOTIDE_EXCHANGE_FACTOR_ACTIVITY		44	-0.273422	-0.892072	0.677419	0.772611	1	3536	tags=36%, list=31%, signal=52%
GO_PHOSPHATIDYLINOSITOL_3_PHOSPHATE_BINDING	GO_PHOSPHATIDYLINOSITOL_3_PHOSPHATE_BINDING		23	-0.309141	-0.890216	0.624746	0.776562	1	1500	tags=22%, list=13%, signal=25%
GO_REGULATION_OF_HISTONE_H3_K4_METHYLATION	GO_REGULATION_OF_HISTONE_H3_K4_METHYLATION		21	-0.324885	-0.890194	0.62955	0.7762	1	961	tags=14%, list=8%, signal=16%
GO_REGULATION_OF_THYMOCYTE_AGGREGATION	GO_REGULATION_OF_THYMOCYTE_AGGREGATION		17	-0.341066	-0.889745	0.622271	0.776803	1	1483	tags=18%, list=13%, signal=20%
GO_GLYCOSAMINOGLYCAN_BINDING	GO_GLYCOSAMINOGLYCAN_BINDING		65	-0.25438	-0.889634	0.668151	0.776657	1	888	tags=11%, list=8%, signal=12%
GO_ACID_SECRETION	GO_ACID_SECRETION		31	-0.294619	-0.887845	0.631111	0.780244	1	749	tags=13%, list=6%, signal=14%
GO_NEGATIVE_REGULATION_OF_LYMPHOCYTE_APOPTOTIC_PROCESS	GO_NEGATIVE_REGULATION_OF_LYMPHOCYTE_APOPTOTIC_PROCESS		19	-0.325087	-0.886645	0.626033	0.782605	1	2160	tags=47%, list=19%, signal=58%
GO_RESPONSE_TO_DSRNA	GO_RESPONSE_TO_DSRNA		43	-0.273447	-0.886177	0.654737	0.783212	1	1983	tags=23%, list=17%, signal=28%
GO_FERTILIZATION	GO_FERTILIZATION		59	-0.257397	-0.88606	0.702222	0.783036	1	426	tags=8%, list=4%, signal=9%
GO_FATTY_ACID_BINDING	GO_FATTY_ACID_BINDING		15	-0.344477	-0.884232	0.610204	0.78682	1	3110	tags=47%, list=27%, signal=64%
GO_POSITIVE_REGULATION_OF_PROTEASOMAL_PROTEIN_CATABOLIC_PROCESS	GO_POSITIVE_REGULATION_OF_PROTEASOMAL_PROTEIN_CATABOLIC_PROCESS		81	-0.242209	-0.883962	0.685654	0.786992	1	1273	tags=14%, list=11%, signal=15%
GO_POSITIVE_REGULATION_OF_CHROMOSOME_SEGREGATION	GO_POSITIVE_REGULATION_OF_CHROMOSOME_SEGREGATION		20	-0.318639	-0.88393	0.627193	0.786643	1	17	tags=5%, list=0%, signal=5%
GO_POSITIVE_REGULATION_OF_RESPONSE_TO_BIOTIC_STIMULUS	GO_POSITIVE_REGULATION_OF_RESPONSE_TO_BIOTIC_STIMULUS		26	-0.307529	-0.88322	0.63473	0.787818	1	2937	tags=38%, list=25%, signal=51%
GO_AXIS_SPECIFICATION	GO_AXIS_SPECIFICATION		43	-0.26933	-0.883059	0.663717	0.787789	1	1048	tags=12%, list=9%, signal=13%
GO_OOCYTE_DIFFERENTIATION	GO_OOCYTE_DIFFERENTIATION		18	-0.322115	-0.882964	0.618947	0.787585	1	1002	tags=17%, list=9%, signal=18%
GO_DNA_MODIFICATION	GO_DNA_MODIFICATION		56	-0.257216	-0.882215	0.695833	0.788897	1	1593	tags=21%, list=14%, signal=25%
GO_RNA_POLYMERASE_BINDING	GO_RNA_POLYMERASE_BINDING		30	-0.2927	-0.882101	0.655172	0.788743	1	684	tags=10%, list=6%, signal=11%
GO_POSITIVE_REGULATION_OF_ORGANELLE_ORGANIZATION	GO_POSITIVE_REGULATION_OF_ORGANELLE_ORGANIZATION		416	-0.19545	-0.881896	0.907285	0.788787	1	2148	tags=19%, list=19%, signal=23%
GO_PROTEASOME_COMPLEX	GO_PROTEASOME_COMPLEX		74	-0.2438	-0.881113	0.715464	0.790187	1	2194	tags=24%, list=19%, signal=30%
GO_PROTON_TRANSPORTING_TWO_SECTOR_ATPASE_COMPLEX	GO_PROTON_TRANSPORTING_TWO_SECTOR_ATPASE_COMPLEX		39	-0.280005	-0.880835	0.67426	0.790398	1	542	tags=13%, list=5%, signal=13%
GO_RESPONSE_TO_TESTOSTERONE	GO_RESPONSE_TO_TESTOSTERONE		27	-0.298539	-0.880084	0.63913	0.791697	1	245	tags=7%, list=2%, signal=8%
GO_POSITIVE_REGULATION_OF_RELEASE_OF_SEQUESTERED_CALCIUM_ION_INTO_CYTOSOL	GO_POSITIVE_REGULATION_OF_RELEASE_OF_SEQUESTERED_CALCIUM_ION_INTO_CYTOSOL		23	-0.30839	-0.879651	0.647558	0.792246	1	543	tags=13%, list=5%, signal=14%
GO_OXIDOREDUCTASE_ACTIVITY_ACTING_ON_CH_OH_GROUP_OF_DONORS	GO_OXIDOREDUCTASE_ACTIVITY_ACTING_ON_CH_OH_GROUP_OF_DONORS		82	-0.237332	-0.877023	0.73774	0.797611	1	2868	tags=32%, list=25%, signal=42%
GO_MODIFIED_AMINO_ACID_BINDING	GO_MODIFIED_AMINO_ACID_BINDING		34	-0.288119	-0.876995	0.654832	0.797255	1	852	tags=12%, list=7%, signal=13%
GO_COFACTOR_BIOSYNTHETIC_PROCESS	GO_COFACTOR_BIOSYNTHETIC_PROCESS		126	-0.224401	-0.876924	0.758621	0.796996	1	1440	tags=13%, list=12%, signal=15%
GO_NEGATIVE_REGULATION_OF_TRANSMEMBRANE_RECEPTOR_PROTEIN_SERINE_THREONINE_KINASE_SIGNALING_PATHWAY	GO_NEGATIVE_REGULATION_OF_TRANSMEMBRANE_RECEPTOR_PROTEIN_SERINE_THREONINE_KINASE_SIGNALING_PATHWAY		52	-0.256874	-0.876721	0.685149	0.797018	1	2859	tags=33%, list=25%, signal=43%
GO_REGULATION_OF_RECEPTOR_INTERNALIZATION	GO_REGULATION_OF_RECEPTOR_INTERNALIZATION		20	-0.321247	-0.876687	0.6375	0.796676	1	2388	tags=45%, list=21%, signal=57%
GO_STEROL_METABOLIC_PROCESS	GO_STEROL_METABOLIC_PROCESS		82	-0.235893	-0.876019	0.717724	0.797744	1	1543	tags=20%, list=13%, signal=22%
GO_DORSAL_VENTRAL_PATTERN_FORMATION	GO_DORSAL_VENTRAL_PATTERN_FORMATION		33	-0.282573	-0.875745	0.646055	0.797915	1	1048	tags=15%, list=9%, signal=17%
GO_CELL_KILLING	GO_CELL_KILLING		27	-0.297008	-0.874798	0.654584	0.799526	1	414	tags=11%, list=4%, signal=11%
GO_HISTONE_LYSINE_N_METHYLTRANSFERASE_ACTIVITY	GO_HISTONE_LYSINE_N_METHYLTRANSFERASE_ACTIVITY		27	-0.295515	-0.87455	0.673428	0.799618	1	1324	tags=19%, list=11%, signal=21%
GO_SENSORY_PERCEPTION	GO_SENSORY_PERCEPTION		191	-0.211844	-0.87449	0.817778	0.799315	1	1985	tags=18%, list=17%, signal=22%
GO_VESICLE_COATING	GO_VESICLE_COATING		61	-0.251297	-0.873152	0.696538	0.801769	1	1004	tags=13%, list=9%, signal=14%
GO_POSITIVE_REGULATION_OF_G1_S_TRANSITION_OF_MITOTIC_CELL_CYCLE	GO_POSITIVE_REGULATION_OF_G1_S_TRANSITION_OF_MITOTIC_CELL_CYCLE		20	-0.319434	-0.872209	0.643396	0.803384	1	556	tags=10%, list=5%, signal=10%
GO_REGULATION_OF_COFACTOR_METABOLIC_PROCESS	GO_REGULATION_OF_COFACTOR_METABOLIC_PROCESS		30	-0.286762	-0.872142	0.672065	0.803111	1	1440	tags=20%, list=12%, signal=23%
GO_POLY_PURINE_TRACT_BINDING	GO_POLY_PURINE_TRACT_BINDING		16	-0.334378	-0.87205	0.662109	0.802888	1	2479	tags=44%, list=21%, signal=56%
GO_POSITIVE_REGULATION_OF_TRANSCRIPTION_FROM_RNA_POLYMERASE_II_PROMOTER_INVOLVED_IN_CELLULAR_RESPONSE_TO_CHEMICAL_STIMULUS	GO_POSITIVE_REGULATION_OF_TRANSCRIPTION_FROM_RNA_POLYMERASE_II_PROMOTER_INVOLVED_IN_CELLULAR_RESPONSE_TO_CHEMICAL_STIMULUS		19	-0.319657	-0.870498	0.626609	0.80585	1	1601	tags=26%, list=14%, signal=30%
GO_REGULATION_OF_CARBOHYDRATE_BIOSYNTHETIC_PROCESS	GO_REGULATION_OF_CARBOHYDRATE_BIOSYNTHETIC_PROCESS		45	-0.264838	-0.868787	0.698113	0.809128	1	2007	tags=22%, list=17%, signal=27%
GO_SITE_OF_POLARIZED_GROWTH	GO_SITE_OF_POLARIZED_GROWTH		86	-0.235153	-0.868052	0.746914	0.810309	1	2898	tags=30%, list=25%, signal=40%
GO_ESTABLISHMENT_OR_MAINTENANCE_OF_CELL_POLARITY	GO_ESTABLISHMENT_OR_MAINTENANCE_OF_CELL_POLARITY		94	-0.232354	-0.867997	0.77459	0.810015	1	813	tags=12%, list=7%, signal=12%
GO_TISSUE_REGENERATION	GO_TISSUE_REGENERATION		24	-0.301726	-0.865749	0.677215	0.814374	1	2618	tags=33%, list=23%, signal=43%
GO_HISTONE_METHYLTRANSFERASE_ACTIVITY	GO_HISTONE_METHYLTRANSFERASE_ACTIVITY		37	-0.27826	-0.864908	0.668889	0.815759	1	1324	tags=16%, list=11%, signal=18%
GO_NEGATIVE_REGULATION_OF_HISTONE_METHYLATION	GO_NEGATIVE_REGULATION_OF_HISTONE_METHYLATION		15	-0.344935	-0.864227	0.654076	0.816782	1	17	tags=7%, list=0%, signal=7%
GO_REGULATION_OF_SYNAPSE_ASSEMBLY	GO_REGULATION_OF_SYNAPSE_ASSEMBLY		18	-0.320662	-0.864014	0.643299	0.816816	1	193	tags=11%, list=2%, signal=11%
GO_STEROL_BIOSYNTHETIC_PROCESS	GO_STEROL_BIOSYNTHETIC_PROCESS		32	-0.280013	-0.863733	0.681818	0.816981	1	3411	tags=47%, list=29%, signal=66%
GO_ADIPOSE_TISSUE_DEVELOPMENT	GO_ADIPOSE_TISSUE_DEVELOPMENT		22	-0.311888	-0.863698	0.650103	0.816625	1	2089	tags=23%, list=18%, signal=28%
GO_CYSTEINE_TYPE_ENDOPEPTIDASE_ACTIVITY	GO_CYSTEINE_TYPE_ENDOPEPTIDASE_ACTIVITY		64	-0.247667	-0.863642	0.762	0.81633	1	1375	tags=16%, list=12%, signal=18%
GO_REGULATION_OF_P38MAPK_CASCADE	GO_REGULATION_OF_P38MAPK_CASCADE		18	-0.324305	-0.862139	0.682377	0.819003	1	1601	tags=28%, list=14%, signal=32%
GO_REGULATION_OF_CELL_ADHESION_MEDIATED_BY_INTEGRIN	GO_REGULATION_OF_CELL_ADHESION_MEDIATED_BY_INTEGRIN		27	-0.29042	-0.861857	0.67094	0.819117	1	374	tags=11%, list=3%, signal=11%
GO_ACTIN_FILAMENT	GO_ACTIN_FILAMENT		50	-0.258483	-0.861734	0.701461	0.818951	1	3240	tags=36%, list=28%, signal=50%
GO_ISOMERASE_ACTIVITY	GO_ISOMERASE_ACTIVITY		113	-0.226561	-0.860988	0.780793	0.820096	1	684	tags=9%, list=6%, signal=9%
GO_REGULATION_OF_SYNAPSE_ORGANIZATION	GO_REGULATION_OF_SYNAPSE_ORGANIZATION		28	-0.289815	-0.860752	0.673307	0.82021	1	871	tags=14%, list=8%, signal=15%
GO_REGULATION_OF_ACTIN_FILAMENT_LENGTH	GO_REGULATION_OF_ACTIN_FILAMENT_LENGTH		107	-0.222704	-0.860619	0.781065	0.820069	1	2067	tags=21%, list=18%, signal=26%
GO_HIPPOCAMPUS_DEVELOPMENT	GO_HIPPOCAMPUS_DEVELOPMENT		43	-0.265706	-0.859273	0.712766	0.822418	1	1664	tags=19%, list=14%, signal=22%
GO_MEMBRANE_DOCKING	GO_MEMBRANE_DOCKING		50	-0.252355	-0.858881	0.697769	0.822784	1	1519	tags=20%, list=13%, signal=23%
GO_POSITIVE_REGULATION_OF_RESPONSE_TO_EXTRACELLULAR_STIMULUS	GO_POSITIVE_REGULATION_OF_RESPONSE_TO_EXTRACELLULAR_STIMULUS		41	-0.266433	-0.857962	0.681917	0.824267	1	2834	tags=32%, list=24%, signal=42%
GO_NEGATIVE_REGULATION_OF_STAT_CASCADE	GO_NEGATIVE_REGULATION_OF_STAT_CASCADE		17	-0.329939	-0.857786	0.673469	0.824212	1	2166	tags=24%, list=19%, signal=29%
GO_GAMMA_TUBULIN_COMPLEX	GO_GAMMA_TUBULIN_COMPLEX		16	-0.332748	-0.857692	0.655532	0.823984	1	572	tags=13%, list=5%, signal=13%
GO_VACUOLE_FUSION	GO_VACUOLE_FUSION		21	-0.314096	-0.856729	0.664502	0.825538	1	1496	tags=24%, list=13%, signal=27%
GO_ADHERENS_JUNCTION_ASSEMBLY	GO_ADHERENS_JUNCTION_ASSEMBLY		25	-0.303878	-0.854646	0.662526	0.829315	1	2134	tags=28%, list=18%, signal=34%
GO_REGULATION_OF_HISTONE_DEACETYLATION	GO_REGULATION_OF_HISTONE_DEACETYLATION		20	-0.312694	-0.853091	0.676349	0.831987	1	2703	tags=40%, list=23%, signal=52%
GO_NEURON_SPINE	GO_NEURON_SPINE		65	-0.242637	-0.852457	0.756989	0.83283	1	1361	tags=15%, list=12%, signal=17%
GO_REGULATION_OF_CELL_CYCLE_CHECKPOINT	GO_REGULATION_OF_CELL_CYCLE_CHECKPOINT		24	-0.293737	-0.851265	0.715177	0.834792	1	517	tags=8%, list=4%, signal=9%
GO_APICAL_JUNCTION_ASSEMBLY	GO_APICAL_JUNCTION_ASSEMBLY		25	-0.295256	-0.851238	0.669246	0.834418	1	3322	tags=44%, list=29%, signal=62%
GO_OSTEOBLAST_DIFFERENTIATION	GO_OSTEOBLAST_DIFFERENTIATION		73	-0.236756	-0.851079	0.782158	0.834332	1	2326	tags=25%, list=20%, signal=31%
GO_SPERM_EGG_RECOGNITION	GO_SPERM_EGG_RECOGNITION		18	-0.318233	-0.850932	0.65625	0.834209	1	360	tags=11%, list=3%, signal=11%
GO_CARDIAC_MUSCLE_CELL_DIFFERENTIATION	GO_CARDIAC_MUSCLE_CELL_DIFFERENTIATION		39	-0.270633	-0.850264	0.702355	0.835097	1	236	tags=8%, list=2%, signal=8%
GO_PROTEIN_LOCALIZATION_TO_VACUOLE	GO_PROTEIN_LOCALIZATION_TO_VACUOLE		38	-0.269239	-0.849901	0.734127	0.835411	1	1500	tags=18%, list=13%, signal=21%
GO_POTASSIUM_ION_TRANSPORT	GO_POTASSIUM_ION_TRANSPORT		51	-0.249237	-0.849896	0.74645	0.834998	1	2630	tags=27%, list=23%, signal=35%
GO_LIPID_OXIDATION	GO_LIPID_OXIDATION		53	-0.25305	-0.849626	0.733766	0.835148	1	1886	tags=21%, list=16%, signal=25%
GO_REGULATION_OF_MESENCHYMAL_CELL_PROLIFERATION	GO_REGULATION_OF_MESENCHYMAL_CELL_PROLIFERATION		21	-0.304409	-0.848628	0.697095	0.83665	1	2257	tags=33%, list=19%, signal=41%
GO_NEGATIVE_REGULATION_OF_B_CELL_ACTIVATION	GO_NEGATIVE_REGULATION_OF_B_CELL_ACTIVATION		22	-0.305983	-0.848289	0.694	0.836896	1	760	tags=14%, list=7%, signal=15%
GO_CELL_DEATH_IN_RESPONSE_TO_OXIDATIVE_STRESS	GO_CELL_DEATH_IN_RESPONSE_TO_OXIDATIVE_STRESS		16	-0.329286	-0.848021	0.644628	0.837008	1	1095	tags=31%, list=9%, signal=34%
GO_EMBRYONIC_CAMERA_TYPE_EYE_DEVELOPMENT	GO_EMBRYONIC_CAMERA_TYPE_EYE_DEVELOPMENT		16	-0.323563	-0.847599	0.669528	0.837388	1	3145	tags=31%, list=27%, signal=43%
GO_STRIATED_MUSCLE_CONTRACTION	GO_STRIATED_MUSCLE_CONTRACTION		43	-0.256344	-0.846477	0.754717	0.839162	1	2446	tags=28%, list=21%, signal=35%
GO_BONE_RESORPTION	GO_BONE_RESORPTION		17	-0.324369	-0.846457	0.672956	0.838773	1	1822	tags=35%, list=16%, signal=42%
GO_SERINE_TYPE_ENDOPEPTIDASE_INHIBITOR_ACTIVITY	GO_SERINE_TYPE_ENDOPEPTIDASE_INHIBITOR_ACTIVITY		26	-0.290888	-0.845791	0.69181	0.839641	1	487	tags=8%, list=4%, signal=8%
GO_SIGNAL_TRANSDUCTION_IN_ABSENCE_OF_LIGAND	GO_SIGNAL_TRANSDUCTION_IN_ABSENCE_OF_LIGAND		25	-0.289723	-0.845311	0.703854	0.840132	1	1275	tags=20%, list=11%, signal=22%
GO_CIS_GOLGI_NETWORK	GO_CIS_GOLGI_NETWORK		36	-0.27038	-0.845119	0.731076	0.840051	1	1014	tags=14%, list=9%, signal=15%
GO_MRNA_CLEAVAGE	GO_MRNA_CLEAVAGE		17	-0.319427	-0.844549	0.669528	0.840722	1	635	tags=18%, list=5%, signal=19%
GO_ATP_BIOSYNTHETIC_PROCESS	GO_ATP_BIOSYNTHETIC_PROCESS		27	-0.285096	-0.844494	0.720251	0.840419	1	1033	tags=19%, list=9%, signal=20%
GO_MAMMARY_GLAND_MORPHOGENESIS	GO_MAMMARY_GLAND_MORPHOGENESIS		17	-0.319074	-0.84365	0.679671	0.841585	1	485	tags=12%, list=4%, signal=12%
GO_PROTEIN_TRANSPORTER_ACTIVITY	GO_PROTEIN_TRANSPORTER_ACTIVITY		83	-0.227334	-0.843058	0.813044	0.842295	1	2330	tags=23%, list=20%, signal=28%
GO_CARBOXY_TERMINAL_DOMAIN_PROTEIN_KINASE_COMPLEX	GO_CARBOXY_TERMINAL_DOMAIN_PROTEIN_KINASE_COMPLEX		21	-0.308728	-0.842391	0.705021	0.843128	1	996	tags=14%, list=9%, signal=16%
GO_REGULATION_OF_CELLULAR_PH	GO_REGULATION_OF_CELLULAR_PH		42	-0.262407	-0.841305	0.749511	0.844775	1	1002	tags=17%, list=9%, signal=18%
GO_MULTICELLULAR_ORGANISMAL_WATER_HOMEOSTASIS	GO_MULTICELLULAR_ORGANISMAL_WATER_HOMEOSTASIS		21	-0.298986	-0.839193	0.695652	0.848292	1	68	tags=5%, list=1%, signal=5%
GO_PYRUVATE_METABOLIC_PROCESS	GO_PYRUVATE_METABOLIC_PROCESS		42	-0.252837	-0.83907	0.748954	0.848116	1	2275	tags=24%, list=20%, signal=30%
GO_ADENYLATE_CYCLASE_ACTIVATING_G_PROTEIN_COUPLED_RECEPTOR_SIGNALING_PATHWAY	GO_ADENYLATE_CYCLASE_ACTIVATING_G_PROTEIN_COUPLED_RECEPTOR_SIGNALING_PATHWAY		23	-0.296985	-0.838963	0.696653	0.847904	1	1847	tags=22%, list=16%, signal=26%
GO_CELL_SUBSTRATE_ADHERENS_JUNCTION_ASSEMBLY	GO_CELL_SUBSTRATE_ADHERENS_JUNCTION_ASSEMBLY		17	-0.320561	-0.838953	0.677419	0.847499	1	3570	tags=53%, list=31%, signal=76%
GO_ACTIN_BINDING	GO_ACTIN_BINDING		238	-0.197521	-0.838473	0.934783	0.848014	1	2457	tags=24%, list=21%, signal=30%
GO_PHOSPHATIDYLINOSITOL_PHOSPHATE_BINDING	GO_PHOSPHATIDYLINOSITOL_PHOSPHATE_BINDING		81	-0.229974	-0.838217	0.817805	0.848075	1	1519	tags=19%, list=13%, signal=21%
GO_REGULATION_OF_CATENIN_IMPORT_INTO_NUCLEUS	GO_REGULATION_OF_CATENIN_IMPORT_INTO_NUCLEUS		16	-0.325323	-0.837908	0.696	0.848229	1	1741	tags=31%, list=15%, signal=37%
GO_NEGATIVE_REGULATION_OF_TYPE_I_INTERFERON_PRODUCTION	GO_NEGATIVE_REGULATION_OF_TYPE_I_INTERFERON_PRODUCTION		38	-0.261097	-0.837439	0.741735	0.8487	1	3145	tags=39%, list=27%, signal=54%
GO_POSITIVE_REGULATION_OF_FIBROBLAST_PROLIFERATION	GO_POSITIVE_REGULATION_OF_FIBROBLAST_PROLIFERATION		31	-0.273184	-0.837117	0.71281	0.848885	1	2543	tags=32%, list=22%, signal=41%
GO_REGULATION_OF_MEIOTIC_CELL_CYCLE	GO_REGULATION_OF_MEIOTIC_CELL_CYCLE		20	-0.304453	-0.836343	0.693277	0.849875	1	42	tags=5%, list=0%, signal=5%
GO_SCF_DEPENDENT_PROTEASOMAL_UBIQUITIN_DEPENDENT_PROTEIN_CATABOLIC_PROCESS	GO_SCF_DEPENDENT_PROTEASOMAL_UBIQUITIN_DEPENDENT_PROTEIN_CATABOLIC_PROCESS		18	-0.313196	-0.835766	0.67086	0.850528	1	1705	tags=22%, list=15%, signal=26%
GO_CYTOPLASMIC_STRESS_GRANULE	GO_CYTOPLASMIC_STRESS_GRANULE		27	-0.28659	-0.835404	0.717672	0.85078	1	5	tags=4%, list=0%, signal=4%
GO_EMBRYO_IMPLANTATION	GO_EMBRYO_IMPLANTATION		24	-0.292577	-0.834284	0.714607	0.852427	1	2764	tags=29%, list=24%, signal=38%
GO_REGULATION_OF_BMP_SIGNALING_PATHWAY	GO_REGULATION_OF_BMP_SIGNALING_PATHWAY		35	-0.270335	-0.834201	0.722815	0.852156	1	2538	tags=31%, list=22%, signal=40%
GO_SULFUR_COMPOUND_CATABOLIC_PROCESS	GO_SULFUR_COMPOUND_CATABOLIC_PROCESS		22	-0.296742	-0.832417	0.719828	0.85493	1	1604	tags=23%, list=14%, signal=26%
GO_HEART_VALVE_DEVELOPMENT	GO_HEART_VALVE_DEVELOPMENT		20	-0.300931	-0.831797	0.708972	0.855634	1	1940	tags=20%, list=17%, signal=24%
GO_NEURON_PROJECTION_EXTENSION	GO_NEURON_PROJECTION_EXTENSION		28	-0.28232	-0.830754	0.702429	0.857021	1	586	tags=11%, list=5%, signal=11%
GO_REGULATION_OF_NUCLEOTIDE_METABOLIC_PROCESS	GO_REGULATION_OF_NUCLEOTIDE_METABOLIC_PROCESS		93	-0.222149	-0.830545	0.828025	0.856943	1	1289	tags=12%, list=11%, signal=13%
[truncated: 202 more rows]
