# Supplementary material for: Integration of genomics and transcriptomics predicts diabetic retinopathy susceptibility genes
Source: eLife. 2020 Nov 9;9:e59980. doi: 10.7554/eLife.59980 (PMC7728435; doi:10.7554/eLife.59980)
Supplement: Figure 1—source data 4. [file elife-59980-fig1-data4.xlsx]

## Sheet: gsea_report_for_na_neg_15553542
NAME	GS<br> follow link to MSigDB	GS DETAILS	SIZE	ES	NES	NOM p-val	FDR q-val	FWER p-val	RANK AT MAX	LEADING EDGE
GSE36891_POLYIC_TLR3_VS_PAM_TLR2_STIM_PERITONEAL_MACROPHAGE_UP	GSE36891_POLYIC_TLR3_VS_PAM_TLR2_STIM_PERITONEAL_MACROPHAGE_UP	Details ...	100	-0.718336	-2.84684	0	0	0	1010	tags=39%, list=9%, signal=42%
GO_RESPONSE_TO_TYPE_I_INTERFERON	GO_RESPONSE_TO_TYPE_I_INTERFERON	Details ...	52	-0.79293	-2.76291	0	0	0	1279	tags=63%, list=11%, signal=71%
NAGASHIMA_EGF_SIGNALING_UP	NAGASHIMA_EGF_SIGNALING_UP	Details ...	47	-0.825964	-2.76227	0	0	0	1243	tags=68%, list=11%, signal=76%
REACTOME_INTERFERON_ALPHA_BETA_SIGNALING	REACTOME_INTERFERON_ALPHA_BETA_SIGNALING	Details ...	48	-0.795781	-2.7396	0	0	0	1279	tags=65%, list=11%, signal=72%
NAGASHIMA_NRG1_SIGNALING_UP	NAGASHIMA_NRG1_SIGNALING_UP	Details ...	139	-0.650794	-2.70006	0	0	0	1428	tags=44%, list=12%, signal=49%
HALLMARK_TNFA_SIGNALING_VIA_NFKB	HALLMARK_TNFA_SIGNALING_VIA_NFKB	Details ...	169	-0.635014	-2.67923	0	0	0	1332	tags=38%, list=12%, signal=42%
GSE14000_UNSTIM_VS_4H_LPS_DC_TRANSLATED_RNA_DN	GSE14000_UNSTIM_VS_4H_LPS_DC_TRANSLATED_RNA_DN	Details ...	139	-0.650832	-2.67457	0	0	0	1892	tags=48%, list=16%, signal=57%
GSE36891_UNSTIM_VS_POLYIC_TLR3_STIM_PERITONEAL_MACROPHAGE_UP	GSE36891_UNSTIM_VS_POLYIC_TLR3_STIM_PERITONEAL_MACROPHAGE_UP	Details ...	82	-0.701044	-2.63235	0	0	0	1360	tags=38%, list=12%, signal=43%
GO_RESPONSE_TO_INTERFERON_GAMMA	GO_RESPONSE_TO_INTERFERON_GAMMA	Details ...	101	-0.660623	-2.62253	0	0	0	1261	tags=41%, list=11%, signal=45%
DIRMEIER_LMP1_RESPONSE_EARLY	DIRMEIER_LMP1_RESPONSE_EARLY	Details ...	60	-0.7312	-2.61798	0	0	0	680	tags=40%, list=6%, signal=42%
GO_CELLULAR_RESPONSE_TO_INTERFERON_GAMMA	GO_CELLULAR_RESPONSE_TO_INTERFERON_GAMMA	Details ...	85	-0.694187	-2.6074	0	0	0	1261	tags=45%, list=11%, signal=50%
BROWNE_INTERFERON_RESPONSIVE_GENES	BROWNE_INTERFERON_RESPONSIVE_GENES	Details ...	60	-0.725223	-2.57709	0	0	0	1437	tags=58%, list=12%, signal=66%
GSE37533_PPARG1_FOXP3_VS_FOXP3_TRANSDUCED_CD4_TCELL_DN	GSE37533_PPARG1_FOXP3_VS_FOXP3_TRANSDUCED_CD4_TCELL_DN	Details ...	177	-0.600842	-2.5733	0	0	0	1365	tags=38%, list=12%, signal=43%
GSE23925_DARK_ZONE_VS_NAIVE_BCELL_DN	GSE23925_DARK_ZONE_VS_NAIVE_BCELL_DN	Details ...	139	-0.623257	-2.56735	0	0	0	1177	tags=29%, list=10%, signal=32%
GSE9988_LOW_LPS_VS_CTRL_TREATED_MONOCYTE_UP	GSE9988_LOW_LPS_VS_CTRL_TREATED_MONOCYTE_UP	Details ...	138	-0.622021	-2.56719	0	0	0	2077	tags=46%, list=18%, signal=56%
GSE18791_CTRL_VS_NEWCASTLE_VIRUS_DC_8H_DN	GSE18791_CTRL_VS_NEWCASTLE_VIRUS_DC_8H_DN	Details ...	144	-0.624016	-2.55787	0	0	0	1647	tags=44%, list=14%, signal=50%
GSE18281_CORTICAL_VS_MEDULLARY_THYMOCYTE_UP	GSE18281_CORTICAL_VS_MEDULLARY_THYMOCYTE_UP	Details ...	145	-0.602463	-2.53354	0	0	0	1295	tags=37%, list=11%, signal=41%
GSE13484_UNSTIM_VS_YF17D_VACCINE_STIM_PBMC_DN	GSE13484_UNSTIM_VS_YF17D_VACCINE_STIM_PBMC_DN	Details ...	162	-0.604129	-2.53315	0	0	0	1464	tags=39%, list=13%, signal=44%
GSE37605_TREG_VS_TCONV_NOD_FOXP3_FUSION_GFP_UP	GSE37605_TREG_VS_TCONV_NOD_FOXP3_FUSION_GFP_UP	Details ...	94	-0.651218	-2.52574	0	0	0	983	tags=33%, list=8%, signal=36%
HECKER_IFNB1_TARGETS	HECKER_IFNB1_TARGETS	Details ...	61	-0.695311	-2.5222	0	0	0	1437	tags=51%, list=12%, signal=58%
GSE18791_UNSTIM_VS_NEWCATSLE_VIRUS_DC_18H_DN	GSE18791_UNSTIM_VS_NEWCATSLE_VIRUS_DC_18H_DN	Details ...	111	-0.624017	-2.52061	0	0	0	1459	tags=43%, list=13%, signal=49%
GSE13485_CTRL_VS_DAY7_YF17D_VACCINE_PBMC_DN	GSE13485_CTRL_VS_DAY7_YF17D_VACCINE_PBMC_DN	Details ...	166	-0.607656	-2.51993	0	0	0	1570	tags=41%, list=14%, signal=47%
GSE23925_LIGHT_ZONE_VS_NAIVE_BCELL_UP	GSE23925_LIGHT_ZONE_VS_NAIVE_BCELL_UP	Details ...	139	-0.609202	-2.51343	0	0	0	1360	tags=36%, list=12%, signal=40%
GSE42021_TREG_PLN_VS_CD24INT_TREG_THYMUS_DN	GSE42021_TREG_PLN_VS_CD24INT_TREG_THYMUS_DN	Details ...	173	-0.591102	-2.50723	0	0	0	1916	tags=43%, list=17%, signal=50%
GSE42021_TREG_PLN_VS_CD24LO_TREG_THYMUS_DN	GSE42021_TREG_PLN_VS_CD24LO_TREG_THYMUS_DN	Details ...	139	-0.610255	-2.50649	0	0	0	1152	tags=35%, list=10%, signal=38%
GSE9988_ANTI_TREM1_VS_CTRL_TREATED_MONOCYTES_UP	GSE9988_ANTI_TREM1_VS_CTRL_TREATED_MONOCYTES_UP	Details ...	151	-0.604946	-2.50587	0	0	0	1908	tags=42%, list=16%, signal=49%
UZONYI_RESPONSE_TO_LEUKOTRIENE_AND_THROMBIN	UZONYI_RESPONSE_TO_LEUKOTRIENE_AND_THROMBIN	Details ...	27	-0.83741	-2.50501	0	0	0	825	tags=56%, list=7%, signal=60%
GSE37605_FOXP3_FUSION_GFP_VS_IRES_GFP_TREG_C57BL6_UP	GSE37605_FOXP3_FUSION_GFP_VS_IRES_GFP_TREG_C57BL6_UP	Details ...	123	-0.621357	-2.50491	0	0	0	1330	tags=34%, list=11%, signal=38%
GSE14769_UNSTIM_VS_40MIN_LPS_BMDM_DN	GSE14769_UNSTIM_VS_40MIN_LPS_BMDM_DN	Details ...	167	-0.586961	-2.49159	0	0	0	1950	tags=38%, list=17%, signal=45%
GSE42021_CD24HI_VS_CD24INT_TREG_THYMUS_DN	GSE42021_CD24HI_VS_CD24INT_TREG_THYMUS_DN	Details ...	172	-0.598021	-2.48859	0	0	0	1831	tags=42%, list=16%, signal=50%
GSE9988_LPS_VS_CTRL_TREATED_MONOCYTE_UP	GSE9988_LPS_VS_CTRL_TREATED_MONOCYTE_UP	Details ...	137	-0.605869	-2.48398	0	0	0	2130	tags=45%, list=18%, signal=54%
GSE18791_CTRL_VS_NEWCASTLE_VIRUS_DC_16H_DN	GSE18791_CTRL_VS_NEWCASTLE_VIRUS_DC_16H_DN	Details ...	132	-0.603507	-2.48218	0	0	0	1423	tags=39%, list=12%, signal=44%
GSE42724_NAIVE_BCELL_VS_PLASMABLAST_UP	GSE42724_NAIVE_BCELL_VS_PLASMABLAST_UP	Details ...	151	-0.589437	-2.46841	0	0	0	1482	tags=41%, list=13%, signal=46%
GSE19888_ADENOSINE_A3R_INH_VS_ACT_WITH_INHIBITOR_PRETREATMENT_IN_MAST_CELL_UP	GSE19888_ADENOSINE_A3R_INH_VS_ACT_WITH_INHIBITOR_PRETREATMENT_IN_MAST_CELL_UP	Details ...	123	-0.612186	-2.46817	0	0	0	1052	tags=38%, list=9%, signal=42%
GSE2706_UNSTIM_VS_8H_R848_DC_DN	GSE2706_UNSTIM_VS_8H_R848_DC_DN	Details ...	145	-0.602686	-2.46817	0	0	0	2058	tags=46%, list=18%, signal=55%
PHONG_TNF_TARGETS_UP	PHONG_TNF_TARGETS_UP	Details ...	48	-0.729796	-2.46811	0	0	0	525	tags=31%, list=5%, signal=33%
GSE9988_ANTI_TREM1_AND_LPS_VS_CTRL_TREATED_MONOCYTES_UP	GSE9988_ANTI_TREM1_AND_LPS_VS_CTRL_TREATED_MONOCYTES_UP	Details ...	144	-0.59854	-2.46487	0	0	0	1641	tags=40%, list=14%, signal=46%
GSE21546_UNSTIM_VS_ANTI_CD3_STIM_ELK1_KO_DP_THYMOCYTES_UP	GSE21546_UNSTIM_VS_ANTI_CD3_STIM_ELK1_KO_DP_THYMOCYTES_UP	Details ...	109	-0.617057	-2.46014	0	0	0	1365	tags=41%, list=12%, signal=46%
GSE14769_UNSTIM_VS_80MIN_LPS_BMDM_DN	GSE14769_UNSTIM_VS_80MIN_LPS_BMDM_DN	Details ...	152	-0.588249	-2.45536	0	0	0	2235	tags=50%, list=19%, signal=61%
GSE37533_PPARG2_FOXP3_VS_FOXP3_TRANSDUCED_CD4_TCELL_DN	GSE37533_PPARG2_FOXP3_VS_FOXP3_TRANSDUCED_CD4_TCELL_DN	Details ...	167	-0.590326	-2.45509	0	0	0	1365	tags=37%, list=12%, signal=41%
GSE42021_TREG_VS_TCONV_PLN_UP	GSE42021_TREG_VS_TCONV_PLN_UP	Details ...	162	-0.588714	-2.44832	0	0	0	1294	tags=39%, list=11%, signal=43%
AMIT_EGF_RESPONSE_40_HELA	AMIT_EGF_RESPONSE_40_HELA	Details ...	38	-0.757146	-2.44388	0	0	0	525	tags=37%, list=5%, signal=38%
GSE41978_ID2_KO_VS_BIM_KO_KLRG1_LOW_EFFECTOR_CD8_TCELL_UP	GSE41978_ID2_KO_VS_BIM_KO_KLRG1_LOW_EFFECTOR_CD8_TCELL_UP	Details ...	166	-0.580138	-2.44059	0	0	0	1365	tags=34%, list=12%, signal=38%
HALLMARK_INTERFERON_GAMMA_RESPONSE	HALLMARK_INTERFERON_GAMMA_RESPONSE	Details ...	174	-0.577162	-2.43841	0	0	0	1279	tags=39%, list=11%, signal=43%
GSE19923_WT_VS_HEB_AND_E2A_KO_DP_THYMOCYTE_DN	GSE19923_WT_VS_HEB_AND_E2A_KO_DP_THYMOCYTE_DN	Details ...	163	-0.579441	-2.43685	0	0	0	1423	tags=31%, list=12%, signal=35%
GSE9988_LOW_LPS_VS_VEHICLE_TREATED_MONOCYTE_UP	GSE9988_LOW_LPS_VS_VEHICLE_TREATED_MONOCYTE_UP	Details ...	139	-0.587448	-2.43516	0	0	0	1787	tags=41%, list=15%, signal=48%
BURTON_ADIPOGENESIS_PEAK_AT_2HR	BURTON_ADIPOGENESIS_PEAK_AT_2HR	Details ...	41	-0.737351	-2.43467	0	0	0	817	tags=37%, list=7%, signal=39%
GSE2706_UNSTIM_VS_8H_LPS_AND_R848_DC_DN	GSE2706_UNSTIM_VS_8H_LPS_AND_R848_DC_DN	Details ...	148	-0.582944	-2.4327	0	0	0	1472	tags=37%, list=13%, signal=42%
RADAEVA_RESPONSE_TO_IFNA1_UP	RADAEVA_RESPONSE_TO_IFNA1_UP	Details ...	48	-0.71479	-2.42621	0	0	0	1365	tags=50%, list=12%, signal=56%
GSE1432_CTRL_VS_IFNG_24H_MICROGLIA_DN	GSE1432_CTRL_VS_IFNG_24H_MICROGLIA_DN	Details ...	165	-0.575656	-2.41891	0	0	0	1477	tags=38%, list=13%, signal=43%
GSE18791_CTRL_VS_NEWCASTLE_VIRUS_DC_4H_DN	GSE18791_CTRL_VS_NEWCASTLE_VIRUS_DC_4H_DN	Details ...	143	-0.596992	-2.41819	0	0	0	1916	tags=44%, list=17%, signal=52%
GSE21546_WT_VS_SAP1A_KO_DP_THYMOCYTES_UP	GSE21546_WT_VS_SAP1A_KO_DP_THYMOCYTES_UP	Details ...	160	-0.574866	-2.41716	0	0	0	1482	tags=38%, list=13%, signal=42%
GSE37533_PPARG1_FOXP3_VS_PPARG2_FOXP3_TRANSDUCED_CD4_TCELL_PIOGLITAZONE_TREATED_DN	GSE37533_PPARG1_FOXP3_VS_PPARG2_FOXP3_TRANSDUCED_CD4_TCELL_PIOGLITAZONE_TREATED_DN	Details ...	170	-0.568061	-2.41443	0	0	0	1285	tags=37%, list=11%, signal=41%
GSE32986_CURDLAN_HIGHDOSE_VS_GMCSF_AND_CURDLAN_HIGHDOSE_STIM_DC_DN	GSE32986_CURDLAN_HIGHDOSE_VS_GMCSF_AND_CURDLAN_HIGHDOSE_STIM_DC_DN	Details ...	162	-0.581581	-2.41339	0	0	0	1835	tags=36%, list=16%, signal=43%
GSE42021_TREG_PLN_VS_TREG_PRECURSORS_THYMUS_DN	GSE42021_TREG_PLN_VS_TREG_PRECURSORS_THYMUS_DN	Details ...	158	-0.574574	-2.41242	0	0	0	1279	tags=37%, list=11%, signal=41%
BENNETT_SYSTEMIC_LUPUS_ERYTHEMATOSUS	BENNETT_SYSTEMIC_LUPUS_ERYTHEMATOSUS	Details ...	24	-0.813053	-2.40061	0	2.44e-05	0.001	1365	tags=75%, list=12%, signal=85%
GO_GRANULOCYTE_MIGRATION	GO_GRANULOCYTE_MIGRATION	Details ...	43	-0.719303	-2.39972	0	2.4e-05	0.001	1212	tags=37%, list=10%, signal=41%
GSE2706_R848_VS_R848_AND_LPS_2H_STIM_DC_DN	GSE2706_R848_VS_R848_AND_LPS_2H_STIM_DC_DN	Details ...	121	-0.590632	-2.39061	0	2.36e-05	0.001	1279	tags=37%, list=11%, signal=41%
GSE19888_ADENOSINE_A3R_INH_PRETREAT_AND_ACT_BY_A3R_VS_TCELL_MEMBRANES_ACT_MAST_CELL_UP	GSE19888_ADENOSINE_A3R_INH_PRETREAT_AND_ACT_BY_A3R_VS_TCELL_MEMBRANES_ACT_MAST_CELL_UP	Details ...	160	-0.564621	-2.38949	0	2.32e-05	0.001	1279	tags=37%, list=11%, signal=41%
GSE9988_LPS_VS_VEHICLE_TREATED_MONOCYTE_UP	GSE9988_LPS_VS_VEHICLE_TREATED_MONOCYTE_UP	Details ...	139	-0.578477	-2.38824	0	2.28e-05	0.001	2142	tags=45%, list=18%, signal=55%
SANA_RESPONSE_TO_IFNG_UP	SANA_RESPONSE_TO_IFNG_UP	Details ...	64	-0.657496	-2.38183	0	2.24e-05	0.001	1271	tags=47%, list=11%, signal=52%
GSE18791_CTRL_VS_NEWCASTLE_VIRUS_DC_10H_DN	GSE18791_CTRL_VS_NEWCASTLE_VIRUS_DC_10H_DN	Details ...	153	-0.566561	-2.3761	0	2.21e-05	0.001	1423	tags=36%, list=12%, signal=40%
GSE43863_TFH_VS_LY6C_LOW_CXCR5NEG_EFFECTOR_CD4_TCELL_DN	GSE43863_TFH_VS_LY6C_LOW_CXCR5NEG_EFFECTOR_CD4_TCELL_DN	Details ...	122	-0.586185	-2.37233	0	2.17e-05	0.001	1769	tags=39%, list=15%, signal=46%
DAUER_STAT3_TARGETS_DN	DAUER_STAT3_TARGETS_DN	Details ...	44	-0.719655	-2.37183	0	2.14e-05	0.001	1279	tags=52%, list=11%, signal=59%
GSE14000_UNSTIM_VS_4H_LPS_DC_DN	GSE14000_UNSTIM_VS_4H_LPS_DC_DN	Details ...	164	-0.566435	-2.371	0	2.11e-05	0.001	1455	tags=38%, list=13%, signal=43%
GSE40666_STAT1_KO_VS_STAT4_KO_CD8_TCELL_WITH_IFNA_STIM_90MIN_DN	GSE40666_STAT1_KO_VS_STAT4_KO_CD8_TCELL_WITH_IFNA_STIM_90MIN_DN	Details ...	78	-0.628698	-2.36938	0	2.07e-05	0.001	736	tags=23%, list=6%, signal=24%
GO_CYTOKINE_ACTIVITY	GO_CYTOKINE_ACTIVITY	Details ...	80	-0.622939	-2.3584	0	2.04e-05	0.001	1212	tags=34%, list=10%, signal=37%
GSE18791_CTRL_VS_NEWCASTLE_VIRUS_DC_6H_DN	GSE18791_CTRL_VS_NEWCASTLE_VIRUS_DC_6H_DN	Details ...	164	-0.552879	-2.35804	0	2.01e-05	0.001	1647	tags=37%, list=14%, signal=42%
GSE42021_CD24HI_VS_CD24LOW_TCONV_THYMUS_DN	GSE42021_CD24HI_VS_CD24LOW_TCONV_THYMUS_DN	Details ...	165	-0.557787	-2.35302	0	1.98e-05	0.001	1246	tags=33%, list=11%, signal=37%
AMIT_SERUM_RESPONSE_40_MCF10A	AMIT_SERUM_RESPONSE_40_MCF10A	Details ...	23	-0.820427	-2.35066	0	1.96e-05	0.001	651	tags=43%, list=6%, signal=46%
GSE40685_TREG_VS_FOXP3_KO_TREG_PRECURSOR_UP	GSE40685_TREG_VS_FOXP3_KO_TREG_PRECURSOR_UP	Details ...	150	-0.568049	-2.35008	0	1.93e-05	0.001	1494	tags=33%, list=13%, signal=38%
ZHANG_INTERFERON_RESPONSE	ZHANG_INTERFERON_RESPONSE	Details ...	22	-0.80849	-2.34857	0	1.9e-05	0.001	1279	tags=68%, list=11%, signal=77%
GO_POSITIVE_REGULATION_OF_RESPONSE_TO_WOUNDING	GO_POSITIVE_REGULATION_OF_RESPONSE_TO_WOUNDING	Details ...	86	-0.617021	-2.34751	0	1.88e-05	0.001	1167	tags=28%, list=10%, signal=31%
GSE2770_TGFB_AND_IL4_ACT_VS_ACT_CD4_TCELL_2H_DN	GSE2770_TGFB_AND_IL4_ACT_VS_ACT_CD4_TCELL_2H_DN	Details ...	170	-0.553436	-2.34548	0	1.85e-05	0.001	1830	tags=41%, list=16%, signal=47%
GSE2706_UNSTIM_VS_2H_LPS_AND_R848_DC_DN	GSE2706_UNSTIM_VS_2H_LPS_AND_R848_DC_DN	Details ...	143	-0.567842	-2.34199	0	1.83e-05	0.001	1752	tags=44%, list=15%, signal=51%
MODULE_75	MODULE_75	Details ...	237	-0.530869	-2.34186	0	1.8e-05	0.001	2264	tags=43%, list=20%, signal=53%
NABA_SECRETED_FACTORS	NABA_SECRETED_FACTORS	Details ...	102	-0.596884	-2.34044	0	1.78e-05	0.001	1212	tags=29%, list=10%, signal=33%
HALLMARK_INTERFERON_ALPHA_RESPONSE	HALLMARK_INTERFERON_ALPHA_RESPONSE	Details ...	87	-0.620649	-2.33721	0	1.75e-05	0.001	1395	tags=49%, list=12%, signal=56%
GSE13485_DAY7_VS_DAY21_YF17D_VACCINE_PBMC_UP	GSE13485_DAY7_VS_DAY21_YF17D_VACCINE_PBMC_UP	Details ...	168	-0.549808	-2.33652	0	1.73e-05	0.001	1500	tags=35%, list=13%, signal=39%
PID_NFAT_TFPATHWAY	PID_NFAT_TFPATHWAY	Details ...	33	-0.742049	-2.33548	0	1.71e-05	0.001	489	tags=27%, list=4%, signal=28%
KIM_LRRC3B_TARGETS	KIM_LRRC3B_TARGETS	Details ...	27	-0.767253	-2.33344	0	3.39e-05	0.002	1287	tags=56%, list=11%, signal=62%
ZWANG_CLASS_3_TRANSIENTLY_INDUCED_BY_EGF	ZWANG_CLASS_3_TRANSIENTLY_INDUCED_BY_EGF	Details ...	152	-0.560833	-2.33132	0	3.35e-05	0.002	1424	tags=34%, list=12%, signal=38%
GO_INTERFERON_GAMMA_MEDIATED_SIGNALING_PATHWAY	GO_INTERFERON_GAMMA_MEDIATED_SIGNALING_PATHWAY	Details ...	57	-0.654708	-2.32814	0	3.31e-05	0.002	1261	tags=44%, list=11%, signal=49%
GO_PEPTIDE_ANTIGEN_BINDING	GO_PEPTIDE_ANTIGEN_BINDING	Details ...	23	-0.801814	-2.3226	0	3.27e-05	0.002	1132	tags=57%, list=10%, signal=63%
MARKEY_RB1_ACUTE_LOF_DN	MARKEY_RB1_ACUTE_LOF_DN	Details ...	175	-0.545889	-2.31947	0	3.23e-05	0.002	1550	tags=38%, list=13%, signal=44%
MODULE_46	MODULE_46	Details ...	228	-0.533765	-2.31567	0	3.2e-05	0.002	2264	tags=45%, list=20%, signal=55%
AMIT_EGF_RESPONSE_40_MCF10A	AMIT_EGF_RESPONSE_40_MCF10A	Details ...	17	-0.855052	-2.31502	0	3.16e-05	0.002	370	tags=35%, list=3%, signal=36%
GSE18791_UNSTIM_VS_NEWCATSLE_VIRUS_DC_10H_DN	GSE18791_UNSTIM_VS_NEWCATSLE_VIRUS_DC_10H_DN	Details ...	142	-0.560967	-2.31004	0	3.12e-05	0.002	1370	tags=38%, list=12%, signal=43%
GSE2706_R848_VS_LPS_2H_STIM_DC_DN	GSE2706_R848_VS_LPS_2H_STIM_DC_DN	Details ...	88	-0.602222	-2.30299	0	3.09e-05	0.002	1437	tags=38%, list=12%, signal=42%
NEMETH_INFLAMMATORY_RESPONSE_LPS_UP	NEMETH_INFLAMMATORY_RESPONSE_LPS_UP	Details ...	78	-0.606477	-2.30099	0	3.06e-05	0.002	1270	tags=35%, list=11%, signal=39%
KEGG_LEISHMANIA_INFECTION	KEGG_LEISHMANIA_INFECTION	Details ...	59	-0.640984	-2.29818	0	3.02e-05	0.002	1478	tags=36%, list=13%, signal=41%
REACTOME_INTERFERON_GAMMA_SIGNALING	REACTOME_INTERFERON_GAMMA_SIGNALING	Details ...	49	-0.66704	-2.29798	0	2.99e-05	0.002	1261	tags=45%, list=11%, signal=50%
GSE7219_WT_VS_NIK_NFKB2_KO_DC_UP	GSE7219_WT_VS_NIK_NFKB2_KO_DC_UP	Details ...	163	-0.548085	-2.29444	0	2.96e-05	0.002	1271	tags=29%, list=11%, signal=33%
GSE37533_PPARG1_FOXP3_VS_FOXP3_TRANSDUCED_CD4_TCELL_PIOGLITAZONE_TREATED_UP	GSE37533_PPARG1_FOXP3_VS_FOXP3_TRANSDUCED_CD4_TCELL_PIOGLITAZONE_TREATED_UP	Details ...	167	-0.543386	-2.29359	0	2.93e-05	0.002	1419	tags=34%, list=12%, signal=38%
GSE34392_ST2_KO_VS_WT_DAY8_LCMV_EFFECTOR_CD8_TCELL_DN	GSE34392_ST2_KO_VS_WT_DAY8_LCMV_EFFECTOR_CD8_TCELL_DN	Details ...	155	-0.561957	-2.29158	0	2.89e-05	0.002	1835	tags=39%, list=16%, signal=46%
GSE26343_UNSTIM_VS_LPS_STIM_NFAT5_KO_MACROPHAGE_DN	GSE26343_UNSTIM_VS_LPS_STIM_NFAT5_KO_MACROPHAGE_DN	Details ...	164	-0.544093	-2.29155	0	2.86e-05	0.002	525	tags=20%, list=5%, signal=20%
GO_POSITIVE_REGULATION_OF_INFLAMMATORY_RESPONSE	GO_POSITIVE_REGULATION_OF_INFLAMMATORY_RESPONSE	Details ...	62	-0.647211	-2.28915	0	2.83e-05	0.002	1167	tags=29%, list=10%, signal=32%
PEDERSEN_METASTASIS_BY_ERBB2_ISOFORM_1	PEDERSEN_METASTASIS_BY_ERBB2_ISOFORM_1	Details ...	27	-0.747671	-2.28652	0	2.81e-05	0.002	1413	tags=48%, list=12%, signal=55%
HESS_TARGETS_OF_HOXA9_AND_MEIS1_DN	HESS_TARGETS_OF_HOXA9_AND_MEIS1_DN	Details ...	52	-0.644571	-2.28593	0	2.78e-05	0.002	1486	tags=42%, list=13%, signal=48%
WINZEN_DEGRADED_VIA_KHSRP	WINZEN_DEGRADED_VIA_KHSRP	Details ...	59	-0.641826	-2.28592	0	2.75e-05	0.002	1181	tags=41%, list=10%, signal=45%
GSE22886_CTRL_VS_LPS_24H_DC_DN	GSE22886_CTRL_VS_LPS_24H_DC_DN		186	-0.530952	-2.28318	0	2.72e-05	0.002	1279	tags=37%, list=11%, signal=40%
GO_MYELOID_LEUKOCYTE_MIGRATION	GO_MYELOID_LEUKOCYTE_MIGRATION		55	-0.651175	-2.28037	0	2.7e-05	0.002	1212	tags=29%, list=10%, signal=32%
EINAV_INTERFERON_SIGNATURE_IN_CANCER	EINAV_INTERFERON_SIGNATURE_IN_CANCER		25	-0.776865	-2.27987	0	2.67e-05	0.002	1279	tags=56%, list=11%, signal=63%
GSE14769_UNSTIM_VS_60MIN_LPS_BMDM_DN	GSE14769_UNSTIM_VS_60MIN_LPS_BMDM_DN		159	-0.550232	-2.27491	0	2.64e-05	0.002	1752	tags=36%, list=15%, signal=42%
GSE9316_IL6_KO_VS_IFNG_KO_INVIVO_EXPANDED_CD4_TCELL_DN	GSE9316_IL6_KO_VS_IFNG_KO_INVIVO_EXPANDED_CD4_TCELL_DN		157	-0.54009	-2.27362	0	2.62e-05	0.002	1192	tags=31%, list=10%, signal=34%
GO_CHEMOKINE_RECEPTOR_BINDING	GO_CHEMOKINE_RECEPTOR_BINDING		29	-0.742096	-2.27079	0	2.59e-05	0.002	1212	tags=38%, list=10%, signal=42%
GSE2706_UNSTIM_VS_2H_R848_DC_DN	GSE2706_UNSTIM_VS_2H_R848_DC_DN		146	-0.552309	-2.26629	0	2.57e-05	0.002	2058	tags=42%, list=18%, signal=50%
TAKEDA_TARGETS_OF_NUP98_HOXA9_FUSION_3D_UP	TAKEDA_TARGETS_OF_NUP98_HOXA9_FUSION_3D_UP		113	-0.572576	-2.25888	0	2.55e-05	0.002	1131	tags=35%, list=10%, signal=38%
GSE16385_UNTREATED_VS_12H_ROSIGLITAZONE_IFNG_TNF_TREATED_MACROPHAGE_UP	GSE16385_UNTREATED_VS_12H_ROSIGLITAZONE_IFNG_TNF_TREATED_MACROPHAGE_UP		108	-0.564211	-2.25796	0	2.52e-05	0.002	525	tags=23%, list=5%, signal=24%
GSE43863_LY6C_INT_CXCR5POS_VS_LY6C_LOW_CXCR5NEG_EFFECTOR_CD4_TCELL_DN	GSE43863_LY6C_INT_CXCR5POS_VS_LY6C_LOW_CXCR5NEG_EFFECTOR_CD4_TCELL_DN		145	-0.553228	-2.25509	0	2.5e-05	0.002	1332	tags=30%, list=12%, signal=34%
GSE46606_UNSTIM_VS_CD40L_IL2_IL5_1DAY_STIMULATED_IRF4HIGH_SORTED_BCELL_DN	GSE46606_UNSTIM_VS_CD40L_IL2_IL5_1DAY_STIMULATED_IRF4HIGH_SORTED_BCELL_DN		157	-0.53929	-2.25325	0	4.94e-05	0.004	2024	tags=36%, list=17%, signal=43%
AMIT_SERUM_RESPONSE_60_MCF10A	AMIT_SERUM_RESPONSE_60_MCF10A		41	-0.667457	-2.25057	0	6.09e-05	0.005	565	tags=32%, list=5%, signal=33%
STAMBOLSKY_TARGETS_OF_MUTATED_TP53_DN	STAMBOLSKY_TARGETS_OF_MUTATED_TP53_DN		36	-0.683751	-2.2477	0	6.04e-05	0.005	1279	tags=36%, list=11%, signal=40%
GNF2_PECAM1	GNF2_PECAM1		46	-0.667024	-2.24729	0	8.37e-05	0.007	1678	tags=46%, list=14%, signal=53%
GSE2706_UNSTIM_VS_2H_LPS_DC_DN	GSE2706_UNSTIM_VS_2H_LPS_DC_DN		139	-0.545999	-2.24117	0	8.3e-05	0.007	1950	tags=44%, list=17%, signal=52%
GSE13485_PRE_VS_POST_YF17D_VACCINATION_PBMC_DN	GSE13485_PRE_VS_POST_YF17D_VACCINATION_PBMC_DN		162	-0.530572	-2.24111	0	8.22e-05	0.007	1617	tags=37%, list=14%, signal=42%
GO_CHEMOKINE_ACTIVITY	GO_CHEMOKINE_ACTIVITY		22	-0.770068	-2.24035	0	8.15e-05	0.007	1212	tags=50%, list=10%, signal=56%
GSE22140_GERMFREE_VS_SPF_MOUSE_CD4_TCELL_UP	GSE22140_GERMFREE_VS_SPF_MOUSE_CD4_TCELL_UP		161	-0.528417	-2.23892	0	9.22e-05	0.008	1279	tags=31%, list=11%, signal=34%
GO_ANTIGEN_BINDING	GO_ANTIGEN_BINDING		55	-0.63651	-2.2378	0	9.14e-05	0.008	1132	tags=38%, list=10%, signal=42%
PID_CD8_TCR_DOWNSTREAM_PATHWAY	PID_CD8_TCR_DOWNSTREAM_PATHWAY		43	-0.662231	-2.23393	0	0.000102	0.009	585	tags=26%, list=5%, signal=27%
GO_CHEMOKINE_MEDIATED_SIGNALING_PATHWAY	GO_CHEMOKINE_MEDIATED_SIGNALING_PATHWAY		29	-0.72156	-2.2339	0	0.000101	0.009	1212	tags=34%, list=10%, signal=38%
SAFFORD_T_LYMPHOCYTE_ANERGY	SAFFORD_T_LYMPHOCYTE_ANERGY		63	-0.61501	-2.23192	0	0.0001	0.009	352	tags=17%, list=3%, signal=18%
GSE18791_CTRL_VS_NEWCASTLE_VIRUS_DC_14H_DN	GSE18791_CTRL_VS_NEWCASTLE_VIRUS_DC_14H_DN		116	-0.553765	-2.22893	0	9.95e-05	0.009	1423	tags=34%, list=12%, signal=38%
GSE42021_CD24INT_VS_CD24LOW_TREG_THYMUS_DN	GSE42021_CD24INT_VS_CD24LOW_TREG_THYMUS_DN		125	-0.554166	-2.22867	0	9.87e-05	0.009	1365	tags=34%, list=12%, signal=38%
BROCKE_APOPTOSIS_REVERSED_BY_IL6	BROCKE_APOPTOSIS_REVERSED_BY_IL6		130	-0.550893	-2.22851	0	9.79e-05	0.009	2196	tags=40%, list=19%, signal=49%
BOSCO_INTERFERON_INDUCED_ANTIVIRAL_MODULE	BOSCO_INTERFERON_INDUCED_ANTIVIRAL_MODULE		67	-0.617782	-2.22731	0	9.71e-05	0.009	1395	tags=43%, list=12%, signal=49%
GSE18791_UNSTIM_VS_NEWCATSLE_VIRUS_DC_6H_DN	GSE18791_UNSTIM_VS_NEWCATSLE_VIRUS_DC_6H_DN		153	-0.532268	-2.22647	0	9.64e-05	0.009	1505	tags=35%, list=13%, signal=40%
WALLACE_PROSTATE_CANCER_RACE_UP	WALLACE_PROSTATE_CANCER_RACE_UP		204	-0.518966	-2.21852	0	0.000117	0.011	2052	tags=41%, list=18%, signal=49%
GSE25088_IL4_VS_IL4_AND_ROSIGLITAZONE_STIM_STAT6_KO_MACROPHAGE_DAY10_DN	GSE25088_IL4_VS_IL4_AND_ROSIGLITAZONE_STIM_STAT6_KO_MACROPHAGE_DAY10_DN		158	-0.533571	-2.21462	0	0.000116	0.011	1675	tags=34%, list=14%, signal=39%
GSE18791_CTRL_VS_NEWCASTLE_VIRUS_DC_12H_DN	GSE18791_CTRL_VS_NEWCASTLE_VIRUS_DC_12H_DN		145	-0.541146	-2.21333	0	0.000126	0.012	1654	tags=38%, list=14%, signal=44%
PLASARI_TGFB1_TARGETS_1HR_UP	PLASARI_TGFB1_TARGETS_1HR_UP		25	-0.743994	-2.21274	0	0.000125	0.012	1413	tags=52%, list=12%, signal=59%
PID_AP1_PATHWAY	PID_AP1_PATHWAY		43	-0.661025	-2.20654	0	0.000124	0.012	736	tags=30%, list=6%, signal=32%
GNF2_FOS	GNF2_FOS		29	-0.713623	-2.20567	0	0.000123	0.012	1397	tags=52%, list=12%, signal=59%
PID_ATF2_PATHWAY	PID_ATF2_PATHWAY		43	-0.656753	-2.20227	0	0.000122	0.012	1899	tags=51%, list=16%, signal=61%
GSE27434_WT_VS_DNMT1_KO_TREG_DN	GSE27434_WT_VS_DNMT1_KO_TREG_DN		159	-0.526488	-2.20162	0	0.000121	0.012	2319	tags=41%, list=20%, signal=50%
GSE9988_ANTI_TREM1_AND_LPS_VS_VEHICLE_TREATED_MONOCYTES_UP	GSE9988_ANTI_TREM1_AND_LPS_VS_VEHICLE_TREATED_MONOCYTES_UP		130	-0.544487	-2.19744	0	0.00012	0.012	2077	tags=42%, list=18%, signal=50%
GO_CCR_CHEMOKINE_RECEPTOR_BINDING	GO_CCR_CHEMOKINE_RECEPTOR_BINDING		18	-0.810192	-2.19449	0	0.000119	0.012	1212	tags=50%, list=10%, signal=56%
ZHAN_MULTIPLE_MYELOMA_LB_DN	ZHAN_MULTIPLE_MYELOMA_LB_DN		31	-0.700789	-2.19271	0	0.000118	0.012	1003	tags=52%, list=9%, signal=56%
BASSO_CD40_SIGNALING_UP	BASSO_CD40_SIGNALING_UP		95	-0.566572	-2.19189	0	0.000118	0.012	1782	tags=34%, list=15%, signal=39%
MOSERLE_IFNA_RESPONSE	MOSERLE_IFNA_RESPONSE		31	-0.696744	-2.18993	0	0.000126	0.013	1437	tags=55%, list=12%, signal=62%
GSE7218_UNSTIM_VS_ANTIGEN_STIM_THROUGH_IGG_BCELL_DN	GSE7218_UNSTIM_VS_ANTIGEN_STIM_THROUGH_IGG_BCELL_DN		116	-0.547298	-2.18865	0	0.000125	0.013	1962	tags=36%, list=17%, signal=43%
GNF2_TNFRSF1B	GNF2_TNFRSF1B		53	-0.625887	-2.18813	0	0.000125	0.013	1671	tags=40%, list=14%, signal=46%
GO_MONOCYTE_CHEMOTAXIS	GO_MONOCYTE_CHEMOTAXIS		22	-0.758132	-2.1874	0	0.000124	0.013	1212	tags=41%, list=10%, signal=46%
GO_LYMPHOCYTE_CHEMOTAXIS	GO_LYMPHOCYTE_CHEMOTAXIS		22	-0.756573	-2.18603	0	0.000123	0.013	1212	tags=50%, list=10%, signal=56%
GSE21546_ELK1_KO_VS_SAP1A_KO_AND_ELK1_KO_DP_THYMOCYTES_UP	GSE21546_ELK1_KO_VS_SAP1A_KO_AND_ELK1_KO_DP_THYMOCYTES_UP		139	-0.538648	-2.1837	0	0.000122	0.013	1365	tags=35%, list=12%, signal=39%
REACTOME_INTERFERON_SIGNALING	REACTOME_INTERFERON_SIGNALING		129	-0.538726	-2.18276	0	0.00014	0.015	1279	tags=32%, list=11%, signal=35%
LI_INDUCED_T_TO_NATURAL_KILLER_UP	LI_INDUCED_T_TO_NATURAL_KILLER_UP		243	-0.498493	-2.18226	0	0.000139	0.015	1912	tags=33%, list=17%, signal=39%
GO_RESPONSE_TO_INTERLEUKIN_1	GO_RESPONSE_TO_INTERLEUKIN_1		71	-0.597274	-2.18092	0	0.000147	0.016	1212	tags=31%, list=10%, signal=34%
GNF2_CD33	GNF2_CD33		34	-0.688703	-2.1791	0	0.000156	0.017	941	tags=44%, list=8%, signal=48%
GO_CELLULAR_RESPONSE_TO_INTERLEUKIN_1	GO_CELLULAR_RESPONSE_TO_INTERLEUKIN_1		52	-0.62949	-2.17908	0	0.000154	0.017	1212	tags=31%, list=10%, signal=34%
GO_LEUKOCYTE_CHEMOTAXIS	GO_LEUKOCYTE_CHEMOTAXIS		67	-0.606228	-2.17818	0	0.000163	0.018	1212	tags=30%, list=10%, signal=33%
RASHI_RESPONSE_TO_IONIZING_RADIATION_1	RASHI_RESPONSE_TO_IONIZING_RADIATION_1		31	-0.712747	-2.17796	0	0.000161	0.018	525	tags=29%, list=5%, signal=30%
PAPASPYRIDONOS_UNSTABLE_ATEROSCLEROTIC_PLAQUE_UP	PAPASPYRIDONOS_UNSTABLE_ATEROSCLEROTIC_PLAQUE_UP		41	-0.655249	-2.17672	0	0.000178	0.02	1506	tags=49%, list=13%, signal=56%
GO_CYTOKINE_MEDIATED_SIGNALING_PATHWAY	GO_CYTOKINE_MEDIATED_SIGNALING_PATHWAY		292	-0.486341	-2.17609	0	0.000186	0.021	1288	tags=25%, list=11%, signal=28%
GSE10325_CD4_TCELL_VS_LUPUS_CD4_TCELL_DN	GSE10325_CD4_TCELL_VS_LUPUS_CD4_TCELL_DN		157	-0.520891	-2.17504	0	0.000185	0.021	1437	tags=39%, list=12%, signal=44%
SANA_TNF_SIGNALING_UP	SANA_TNF_SIGNALING_UP		61	-0.606724	-2.17478	0	0.000184	0.021	1604	tags=43%, list=14%, signal=49%
TIAN_TNF_SIGNALING_NOT_VIA_NFKB	TIAN_TNF_SIGNALING_NOT_VIA_NFKB		18	-0.802849	-2.17353	0	0.000182	0.021	624	tags=50%, list=5%, signal=53%
GSE29617_CTRL_VS_DAY7_TIV_FLU_VACCINE_PBMC_2008_UP	GSE29617_CTRL_VS_DAY7_TIV_FLU_VACCINE_PBMC_2008_UP		138	-0.524217	-2.17234	0	0.000181	0.021	1028	tags=25%, list=9%, signal=28%
GSE6269_HEALTHY_VS_FLU_INF_PBMC_DN	GSE6269_HEALTHY_VS_FLU_INF_PBMC_DN		133	-0.524232	-2.16816	0	0.000189	0.022	1486	tags=33%, list=13%, signal=38%
ZHU_CMV_ALL_UP	ZHU_CMV_ALL_UP		104	-0.556322	-2.16805	0	0.000188	0.022	1332	tags=31%, list=12%, signal=34%
GSE2706_UNSTIM_VS_8H_LPS_DC_DN	GSE2706_UNSTIM_VS_8H_LPS_DC_DN		144	-0.521271	-2.16652	0	0.000195	0.023	1736	tags=37%, list=15%, signal=43%
GSE14769_UNSTIM_VS_120MIN_LPS_BMDM_DN	GSE14769_UNSTIM_VS_120MIN_LPS_BMDM_DN		154	-0.523242	-2.16502	0	0.000202	0.024	2274	tags=44%, list=20%, signal=53%
KEGG_ANTIGEN_PROCESSING_AND_PRESENTATION	KEGG_ANTIGEN_PROCESSING_AND_PRESENTATION		52	-0.636903	-2.16367	0	0.000201	0.024	1454	tags=48%, list=13%, signal=55%
BOWIE_RESPONSE_TO_EXTRACELLULAR_MATRIX	BOWIE_RESPONSE_TO_EXTRACELLULAR_MATRIX		17	-0.79926	-2.16282	0	0.000208	0.025	1831	tags=71%, list=16%, signal=84%
SARTIPY_NORMAL_AT_INSULIN_RESISTANCE_UP	SARTIPY_NORMAL_AT_INSULIN_RESISTANCE_UP		28	-0.707708	-2.16231	0	0.000207	0.025	1413	tags=32%, list=12%, signal=37%
GNF2_CARD15	GNF2_CARD15		48	-0.628879	-2.16226	0	0.000206	0.025	1671	tags=46%, list=14%, signal=53%
MAHADEVAN_RESPONSE_TO_MP470_DN	MAHADEVAN_RESPONSE_TO_MP470_DN		17	-0.79116	-2.16212	0	0.000205	0.025	1413	tags=71%, list=12%, signal=80%
MODULE_345	MODULE_345		89	-0.566471	-2.16014	0	0.000228	0.028	1437	tags=30%, list=12%, signal=34%
ALTEMEIER_RESPONSE_TO_LPS_WITH_MECHANICAL_VENTILATION	ALTEMEIER_RESPONSE_TO_LPS_WITH_MECHANICAL_VENTILATION		89	-0.566864	-2.15664	0	0.000235	0.029	1797	tags=38%, list=16%, signal=45%
TAKEDA_TARGETS_OF_NUP98_HOXA9_FUSION_10D_UP	TAKEDA_TARGETS_OF_NUP98_HOXA9_FUSION_10D_UP		123	-0.529306	-2.15454	0	0.000233	0.029	1486	tags=37%, list=13%, signal=42%
GO_INNATE_IMMUNE_RESPONSE	GO_INNATE_IMMUNE_RESPONSE		339	-0.467726	-2.15386	0	0.00024	0.03	1395	tags=26%, list=12%, signal=28%
ST_DIFFERENTIATION_PATHWAY_IN_PC12_CELLS	ST_DIFFERENTIATION_PATHWAY_IN_PC12_CELLS		34	-0.673485	-2.15348	0	0.000239	0.03	2079	tags=47%, list=18%, signal=57%
GROSS_HYPOXIA_VIA_ELK3_DN	GROSS_HYPOXIA_VIA_ELK3_DN		118	-0.53972	-2.15094	0	0.000261	0.033	1723	tags=36%, list=15%, signal=41%
ZHU_CMV_24_HR_UP	ZHU_CMV_24_HR_UP		82	-0.57009	-2.15055	0	0.00026	0.033	1892	tags=35%, list=16%, signal=42%
GNF2_CD53	GNF2_CD53		57	-0.609267	-2.14572	0	0.000266	0.034	1921	tags=46%, list=17%, signal=54%
GO_MHC_PROTEIN_COMPLEX	GO_MHC_PROTEIN_COMPLEX		23	-0.733056	-2.14502	0	0.000272	0.035	585	tags=39%, list=5%, signal=41%
GSE360_LOW_DOSE_B_MALAYI_VS_M_TUBERCULOSIS_DC_DN	GSE360_LOW_DOSE_B_MALAYI_VS_M_TUBERCULOSIS_DC_DN		153	-0.514459	-2.14493	0	0.000271	0.035	2015	tags=38%, list=17%, signal=45%
GO_G_PROTEIN_COUPLED_RECEPTOR_BINDING	GO_G_PROTEIN_COUPLED_RECEPTOR_BINDING		110	-0.54282	-2.14373	0	0.000277	0.036	1692	tags=29%, list=15%, signal=34%
GSE42021_CD24HI_VS_CD24LOW_TREG_THYMUS_DN	GSE42021_CD24HI_VS_CD24LOW_TREG_THYMUS_DN		142	-0.525973	-2.14258	0	0.000291	0.038	1279	tags=32%, list=11%, signal=35%
GSE33424_CD161_INT_VS_NEG_CD8_TCELL_UP	GSE33424_CD161_INT_VS_NEG_CD8_TCELL_UP		164	-0.519015	-2.14081	0	0.000312	0.04	1279	tags=32%, list=11%, signal=36%
GSE13485_DAY1_VS_DAY7_YF17D_VACCINE_PBMC_DN	GSE13485_DAY1_VS_DAY7_YF17D_VACCINE_PBMC_DN		170	-0.50587	-2.13998	0	0.00031	0.04	1370	tags=33%, list=12%, signal=37%
BOWIE_RESPONSE_TO_TAMOXIFEN	BOWIE_RESPONSE_TO_TAMOXIFEN		18	-0.78647	-2.13984	0	0.000316	0.041	1279	tags=56%, list=11%, signal=62%
ZHU_CMV_8_HR_UP	ZHU_CMV_8_HR_UP		41	-0.6445	-2.13657	0	0.000337	0.044	1892	tags=51%, list=16%, signal=61%
CROONQUIST_STROMAL_STIMULATION_UP	CROONQUIST_STROMAL_STIMULATION_UP		32	-0.691239	-2.13639	0	0.000335	0.044	1215	tags=41%, list=10%, signal=45%
GSE29618_PDC_VS_MDC_DN	GSE29618_PDC_VS_MDC_DN		170	-0.500583	-2.13468	0	0.000341	0.045	2207	tags=36%, list=19%, signal=44%
MODULE_292	MODULE_292		98	-0.549145	-2.13311	0	0.000346	0.046	1486	tags=32%, list=13%, signal=36%
GO_REGULATION_OF_CELL_KILLING	GO_REGULATION_OF_CELL_KILLING		45	-0.637616	-2.1328	0	0.000344	0.046	909	tags=36%, list=8%, signal=38%
GSE21360_PRIMARY_VS_TERTIARY_MEMORY_CD8_TCELL_DN	GSE21360_PRIMARY_VS_TERTIARY_MEMORY_CD8_TCELL_DN		165	-0.507229	-2.13201	0	0.000357	0.048	2133	tags=39%, list=18%, signal=48%
IL2_UP.V1_UP	IL2_UP.V1_UP		113	-0.535804	-2.13033	0	0.00037	0.05	1658	tags=31%, list=14%, signal=36%
GSE21927_SPLEEN_C57BL6_VS_4T1_TUMOR_BALBC_MONOCYTES_DN	GSE21927_SPLEEN_C57BL6_VS_4T1_TUMOR_BALBC_MONOCYTES_DN		176	-0.504602	-2.12965	0	0.000404	0.055	1279	tags=28%, list=11%, signal=31%
STEARMAN_TUMOR_FIELD_EFFECT_UP	STEARMAN_TUMOR_FIELD_EFFECT_UP		24	-0.738775	-2.12952	0	0.000402	0.055	1399	tags=50%, list=12%, signal=57%
GO_CELL_CHEMOTAXIS	GO_CELL_CHEMOTAXIS		88	-0.561001	-2.12635	0	0.000443	0.061	1261	tags=27%, list=11%, signal=30%
GSE9988_LPS_VS_LPS_AND_ANTI_TREM1_MONOCYTE_DN	GSE9988_LPS_VS_LPS_AND_ANTI_TREM1_MONOCYTE_DN		143	-0.513159	-2.12634	0	0.00044	0.061	1811	tags=36%, list=16%, signal=43%
GSE14769_UNSTIM_VS_20MIN_LPS_BMDM_DN	GSE14769_UNSTIM_VS_20MIN_LPS_BMDM_DN		138	-0.519303	-2.12336	0	0.000473	0.066	975	tags=21%, list=8%, signal=23%
GO_LEUKOCYTE_MIGRATION	GO_LEUKOCYTE_MIGRATION		154	-0.503975	-2.12135	0	0.000485	0.068	1391	tags=26%, list=12%, signal=29%
MODULE_84	MODULE_84		347	-0.462535	-2.121	0	0.000497	0.07	1723	tags=31%, list=15%, signal=35%
FARMER_BREAST_CANCER_CLUSTER_1	FARMER_BREAST_CANCER_CLUSTER_1		33	-0.680426	-2.11709	0	0.000522	0.074	1783	tags=48%, list=15%, signal=57%
GSE29618_MONOCYTE_VS_PDC_DAY7_FLU_VACCINE_UP	GSE29618_MONOCYTE_VS_PDC_DAY7_FLU_VACCINE_UP		156	-0.502909	-2.11691	0	0.000519	0.074	1917	tags=32%, list=17%, signal=38%
MODULE_5	MODULE_5		276	-0.470902	-2.11579	0	0.000537	0.077	1797	tags=32%, list=16%, signal=36%
GSE42021_TCONV_PLN_VS_CD24HI_TCONV_THYMUS_UP	GSE42021_TCONV_PLN_VS_CD24HI_TCONV_THYMUS_UP		169	-0.508089	-2.11315	0	0.000555	0.08	2017	tags=36%, list=17%, signal=42%
KEGG_ALLOGRAFT_REJECTION	KEGG_ALLOGRAFT_REJECTION		29	-0.682208	-2.11182	0	0.000566	0.082	585	tags=41%, list=5%, signal=43%
GSE360_HIGH_DOSE_B_MALAYI_VS_M_TUBERCULOSIS_DC_DN	GSE360_HIGH_DOSE_B_MALAYI_VS_M_TUBERCULOSIS_DC_DN		148	-0.504846	-2.10997	0	0.000611	0.087	1831	tags=34%, list=16%, signal=40%
HAHTOLA_MYCOSIS_FUNGOIDES_CD4_UP	HAHTOLA_MYCOSIS_FUNGOIDES_CD4_UP		52	-0.596185	-2.10995	0	0.000608	0.087	889	tags=27%, list=8%, signal=29%
GSE7219_UNSTIM_VS_LPS_AND_ANTI_CD40_STIM_NIK_NFKB2_KO_DC_DN	GSE7219_UNSTIM_VS_LPS_AND_ANTI_CD40_STIM_NIK_NFKB2_KO_DC_DN		165	-0.504898	-2.1079	0	0.000619	0.089	1010	tags=26%, list=9%, signal=28%
GSE10325_BCELL_VS_LUPUS_BCELL_DN	GSE10325_BCELL_VS_LUPUS_BCELL_DN		184	-0.497289	-2.10687	0	0.000622	0.09	1437	tags=33%, list=12%, signal=37%
BROWNE_HCMV_INFECTION_30MIN_UP	BROWNE_HCMV_INFECTION_30MIN_UP		27	-0.704449	-2.10591	0	0.000619	0.09	675	tags=37%, list=6%, signal=39%
GO_LUMENAL_SIDE_OF_MEMBRANE	GO_LUMENAL_SIDE_OF_MEMBRANE		30	-0.681106	-2.10512	0	0.000616	0.09	1475	tags=47%, list=13%, signal=53%
NADLER_OBESITY_UP	NADLER_OBESITY_UP		48	-0.609272	-2.10361	0	0.000633	0.092	1587	tags=42%, list=14%, signal=48%
GSE26030_TH1_VS_TH17_DAY5_POST_POLARIZATION_UP	GSE26030_TH1_VS_TH17_DAY5_POST_POLARIZATION_UP		151	-0.501939	-2.10251	0	0.00065	0.095	1297	tags=32%, list=11%, signal=35%
SRF_01	SRF_01		34	-0.650855	-2.10156	0	0.000666	0.098	525	tags=24%, list=5%, signal=25%
KEGG_CYTOKINE_CYTOKINE_RECEPTOR_INTERACTION	KEGG_CYTOKINE_CYTOKINE_RECEPTOR_INTERACTION		133	-0.512166	-2.09972	0	0.00067	0.099	887	tags=20%, list=8%, signal=22%
TARTE_PLASMA_CELL_VS_PLASMABLAST_UP	TARTE_PLASMA_CELL_VS_PLASMABLAST_UP		210	-0.482665	-2.09971	0	0.000666	0.099	1975	tags=33%, list=17%, signal=39%
RUTELLA_RESPONSE_TO_HGF_DN	RUTELLA_RESPONSE_TO_HGF_DN		198	-0.490259	-2.09872	0	0.000682	0.102	1391	tags=27%, list=12%, signal=30%
MODULE_2	MODULE_2		219	-0.481105	-2.09836	0	0.000679	0.102	1400	tags=29%, list=12%, signal=33%
AMIT_EGF_RESPONSE_60_HELA	AMIT_EGF_RESPONSE_60_HELA		41	-0.625235	-2.09325	0	0.000765	0.116	1413	tags=37%, list=12%, signal=42%
GSE360_CTRL_VS_M_TUBERCULOSIS_DC_DN	GSE360_CTRL_VS_M_TUBERCULOSIS_DC_DN		148	-0.508475	-2.09144	0	0.000794	0.118	1106	tags=24%, list=10%, signal=27%
GSE21546_UNSTIM_VS_ANTI_CD3_STIM_SAP1A_KO_AND_ELK1_KO_DP_THYMOCYTES_UP	GSE21546_UNSTIM_VS_ANTI_CD3_STIM_SAP1A_KO_AND_ELK1_KO_DP_THYMOCYTES_UP		98	-0.542607	-2.09127	0	0.00079	0.118	1365	tags=38%, list=12%, signal=42%
GO_LYMPHOCYTE_MIGRATION	GO_LYMPHOCYTE_MIGRATION		29	-0.688086	-2.09039	0	0.000793	0.119	1212	tags=38%, list=10%, signal=42%
GSE25085_FETAL_BM_VS_ADULT_BM_SP4_THYMIC_IMPLANT_UP	GSE25085_FETAL_BM_VS_ADULT_BM_SP4_THYMIC_IMPLANT_UP		163	-0.497433	-2.0894	0	0.000814	0.123	1917	tags=33%, list=17%, signal=39%
GO_CYTOKINE_RECEPTOR_BINDING	GO_CYTOKINE_RECEPTOR_BINDING		135	-0.515615	-2.08933	0	0.00081	0.123	1212	tags=24%, list=10%, signal=26%
GO_RESPONSE_TO_CYTOKINE	GO_RESPONSE_TO_CYTOKINE		473	-0.441956	-2.08701	0	0.000844	0.128	1454	tags=25%, list=13%, signal=27%
GROSS_ELK3_TARGETS_DN	GROSS_ELK3_TARGETS_DN		22	-0.731956	-2.08651	0	0.000846	0.129	1886	tags=59%, list=16%, signal=70%
GSE45365_NK_CELL_VS_CD11B_DC_DN	GSE45365_NK_CELL_VS_CD11B_DC_DN		140	-0.510349	-2.08629	0	0.000843	0.129	2061	tags=32%, list=18%, signal=39%
GSE38681_WT_VS_LYL1_KO_LYMPHOID_PRIMED_MULTIPOTENT_PROGENITOR_DN	GSE38681_WT_VS_LYL1_KO_LYMPHOID_PRIMED_MULTIPOTENT_PROGENITOR_DN		167	-0.499948	-2.08537	0	0.000845	0.13	1325	tags=31%, list=11%, signal=35%
DACOSTA_ERCC3_ALLELE_XPCS_VS_TTD_UP	DACOSTA_ERCC3_ALLELE_XPCS_VS_TTD_UP		16	-0.776418	-2.08458	0	0.000847	0.131	890	tags=31%, list=8%, signal=34%
GESERICK_TERT_TARGETS_DN	GESERICK_TERT_TARGETS_DN		19	-0.752513	-2.08451	0	0.000844	0.131	1413	tags=63%, list=12%, signal=72%
BROWNE_HCMV_INFECTION_2HR_UP	BROWNE_HCMV_INFECTION_2HR_UP		22	-0.727119	-2.08306	0	0.000858	0.134	477	tags=27%, list=4%, signal=28%
GSE45365_CD8A_DC_VS_CD11B_DC_IFNAR_KO_MCMV_INFECTION_DN	GSE45365_CD8A_DC_VS_CD11B_DC_IFNAR_KO_MCMV_INFECTION_DN		68	-0.566144	-2.08122	0	0.000896	0.141	1192	tags=26%, list=10%, signal=29%
TAKEDA_TARGETS_OF_NUP98_HOXA9_FUSION_6HR_DN	TAKEDA_TARGETS_OF_NUP98_HOXA9_FUSION_6HR_DN		25	-0.691538	-2.08087	0	0.000899	0.142	1612	tags=36%, list=14%, signal=42%
GSE9006_TYPE_1_DIABETES_AT_DX_VS_4MONTH_POST_DX_PBMC_UP	GSE9006_TYPE_1_DIABETES_AT_DX_VS_4MONTH_POST_DX_PBMC_UP		172	-0.494269	-2.07919	0	0.000936	0.149	1418	tags=24%, list=12%, signal=27%
ZHANG_RESPONSE_TO_IKK_INHIBITOR_AND_TNF_UP	ZHANG_RESPONSE_TO_IKK_INHIBITOR_AND_TNF_UP		165	-0.496176	-2.07741	0	0.000962	0.153	1787	tags=36%, list=15%, signal=42%
GSE24634_TEFF_VS_TCONV_DAY7_IN_CULTURE_DN	GSE24634_TEFF_VS_TCONV_DAY7_IN_CULTURE_DN		149	-0.503003	-2.07718	0	0.000958	0.153	1812	tags=37%, list=16%, signal=43%
GSE9988_ANTI_TREM1_VS_ANTI_TREM1_AND_LPS_MONOCYTE_DN	GSE9988_ANTI_TREM1_VS_ANTI_TREM1_AND_LPS_MONOCYTE_DN		137	-0.510167	-2.0759	0	0.000966	0.154	2167	tags=43%, list=19%, signal=52%
GSE18281_SUBCAPSULAR_VS_CENTRAL_CORTICAL_REGION_OF_THYMUS_DN	GSE18281_SUBCAPSULAR_VS_CENTRAL_CORTICAL_REGION_OF_THYMUS_DN		159	-0.495717	-2.07454	0	0.000968	0.155	2298	tags=42%, list=20%, signal=51%
GSE10325_CD4_TCELL_VS_MYELOID_DN	GSE10325_CD4_TCELL_VS_MYELOID_DN		154	-0.504095	-2.07415	0	0.000963	0.155	1802	tags=36%, list=16%, signal=42%
GSE43863_DAY6_EFF_VS_DAY150_MEM_TH1_CD4_TCELL_UP	GSE43863_DAY6_EFF_VS_DAY150_MEM_TH1_CD4_TCELL_UP		161	-0.491108	-2.07356	0	0.000971	0.157	1384	tags=30%, list=12%, signal=33%
GNF2_CD48	GNF2_CD48		31	-0.659358	-2.07192	0	0.0010014	0.161	1831	tags=52%, list=16%, signal=61%
GO_POSITIVE_REGULATION_OF_RESPONSE_TO_EXTERNAL_STIMULUS	GO_POSITIVE_REGULATION_OF_RESPONSE_TO_EXTERNAL_STIMULUS		174	-0.492423	-2.07188	0	0.000997	0.161	1234	tags=21%, list=11%, signal=23%
PICCALUGA_ANGIOIMMUNOBLASTIC_LYMPHOMA_DN	PICCALUGA_ANGIOIMMUNOBLASTIC_LYMPHOMA_DN		117	-0.521116	-2.07178	0	0.000999	0.162	2056	tags=37%, list=18%, signal=44%
GO_CELLULAR_RESPONSE_TO_CYTOKINE_STIMULUS	GO_CELLULAR_RESPONSE_TO_CYTOKINE_STIMULUS		390	-0.447441	-2.07035	0	0.00102338	0.166	1437	tags=25%, list=12%, signal=27%
GSE37605_C57BL6_VS_NOD_FOXP3_FUSION_GFP_TREG_DN	GSE37605_C57BL6_VS_NOD_FOXP3_FUSION_GFP_TREG_DN		141	-0.505402	-2.06815	0	0.00104203	0.169	1413	tags=30%, list=12%, signal=34%
SMIRNOV_RESPONSE_TO_IR_6HR_DN	SMIRNOV_RESPONSE_TO_IR_6HR_DN		106	-0.533448	-2.06786	0	0.00104354	0.17	1427	tags=32%, list=12%, signal=36%
IRF7_01	IRF7_01		155	-0.497624	-2.06745	0	0.00105056	0.172	1510	tags=28%, list=13%, signal=31%
GSE9988_LOW_LPS_VS_ANTI_TREM1_AND_LPS_MONOCYTE_DN	GSE9988_LOW_LPS_VS_ANTI_TREM1_AND_LPS_MONOCYTE_DN		143	-0.499853	-2.06637	0	0.00110237	0.182	1678	tags=34%, list=14%, signal=40%
GSE32034_LY6C_HIGH_VS_LOW_ROSIGLIZATONE_TREATED_MONOCYTE_DN	GSE32034_LY6C_HIGH_VS_LOW_ROSIGLIZATONE_TREATED_MONOCYTE_DN		150	-0.493808	-2.06576	0	0.00110349	0.183	2415	tags=37%, list=21%, signal=47%
GSE13485_DAY3_VS_DAY7_YF17D_VACCINE_PBMC_DN	GSE13485_DAY3_VS_DAY7_YF17D_VACCINE_PBMC_DN		142	-0.498517	-2.06554	0	0.00111017	0.185	1437	tags=37%, list=12%, signal=42%
CCAWWNAAGG_SRF_Q4	CCAWWNAAGG_SRF_Q4		47	-0.608387	-2.06407	0	0.00111681	0.186	898	tags=28%, list=8%, signal=30%
GSE24634_IL4_VS_CTRL_TREATED_NAIVE_CD4_TCELL_DAY3_DN	GSE24634_IL4_VS_CTRL_TREATED_NAIVE_CD4_TCELL_DAY3_DN		151	-0.49537	-2.06361	0	0.00111791	0.187	1923	tags=38%, list=17%, signal=45%
TONKS_TARGETS_OF_RUNX1_RUNX1T1_FUSION_ERYTHROCYTE_UP	TONKS_TARGETS_OF_RUNX1_RUNX1T1_FUSION_ERYTHROCYTE_UP		103	-0.527147	-2.06361	0	0.00111342	0.187	1084	tags=33%, list=9%, signal=36%
GSE13485_CTRL_VS_DAY3_YF17D_VACCINE_PBMC_DN	GSE13485_CTRL_VS_DAY3_YF17D_VACCINE_PBMC_DN		153	-0.49648	-2.0633	0	0.00110897	0.187	1437	tags=31%, list=12%, signal=35%
GSE17301_ACD3_ACD28_VS_ACD3_ACD28_AND_IFNA5_STIM_CD8_TCELL_DN	GSE17301_ACD3_ACD28_VS_ACD3_ACD28_AND_IFNA5_STIM_CD8_TCELL_DN		166	-0.483203	-2.06151	0	0.00113742	0.192	2423	tags=43%, list=21%, signal=54%
MCLACHLAN_DENTAL_CARIES_UP	MCLACHLAN_DENTAL_CARIES_UP		168	-0.491951	-2.06131	0	0.00113851	0.193	1787	tags=35%, list=15%, signal=40%
BECKER_TAMOXIFEN_RESISTANCE_UP	BECKER_TAMOXIFEN_RESISTANCE_UP		37	-0.628314	-2.06046	0	0.00115569	0.195	644	tags=24%, list=6%, signal=26%
GSE25123_IL4_VS_IL4_AND_ROSIGLITAZONE_STIM_PPARG_KO_MACROPHAGE_DAY10_DN	GSE25123_IL4_VS_IL4_AND_ROSIGLITAZONE_STIM_PPARG_KO_MACROPHAGE_DAY10_DN		136	-0.501999	-2.0604	0	0.00115114	0.195	2002	tags=36%, list=17%, signal=43%
DAUER_STAT3_TARGETS_UP	DAUER_STAT3_TARGETS_UP		33	-0.660406	-2.05971	0	0.00116285	0.198	1935	tags=48%, list=17%, signal=58%
GSE3982_EOSINOPHIL_VS_NEUTROPHIL_DN	GSE3982_EOSINOPHIL_VS_NEUTROPHIL_DN		134	-0.505924	-2.05914	0	0.00116361	0.199	1533	tags=32%, list=13%, signal=37%
GSE10325_MYELOID_VS_LUPUS_MYELOID_DN	GSE10325_MYELOID_VS_LUPUS_MYELOID_DN		170	-0.488505	-2.05868	0	0.00116974	0.201	1573	tags=34%, list=14%, signal=38%
GSE21360_PRIMARY_VS_QUATERNARY_MEMORY_CD8_TCELL_UP	GSE21360_PRIMARY_VS_QUATERNARY_MEMORY_CD8_TCELL_UP		126	-0.51481	-2.05865	0	0.00117055	0.202	1694	tags=35%, list=15%, signal=40%
THEILGAARD_NEUTROPHIL_AT_SKIN_WOUND_UP	THEILGAARD_NEUTROPHIL_AT_SKIN_WOUND_UP		67	-0.570608	-2.05767	0	0.00120854	0.207	2003	tags=40%, list=17%, signal=48%
GO_CELLULAR_RESPONSE_TO_CALCIUM_ION	GO_CELLULAR_RESPONSE_TO_CALCIUM_ION		28	-0.680734	-2.0562	0	0.00123557	0.212	951	tags=36%, list=8%, signal=39%
GSE36826_WT_VS_IL1R_KO_SKIN_STAPH_AUREUS_INF_DN	GSE36826_WT_VS_IL1R_KO_SKIN_STAPH_AUREUS_INF_DN		166	-0.485418	-2.05413	0	0.00125694	0.217	1490	tags=29%, list=13%, signal=33%
FULCHER_INFLAMMATORY_RESPONSE_LECTIN_VS_LPS_DN	FULCHER_INFLAMMATORY_RESPONSE_LECTIN_VS_LPS_DN		361	-0.446109	-2.05143	0	0.00133085	0.227	1815	tags=30%, list=16%, signal=35%
GSE41867_DAY6_VS_DAY15_LCMV_ARMSTRONG_EFFECTOR_CD8_TCELL_UP	GSE41867_DAY6_VS_DAY15_LCMV_ARMSTRONG_EFFECTOR_CD8_TCELL_UP		109	-0.520736	-2.0509	0	0.00133616	0.229	1472	tags=36%, list=13%, signal=41%
MODULE_169	MODULE_169		74	-0.557761	-2.04798	0	0.00145048	0.247	1687	tags=41%, list=15%, signal=47%
MODULE_6	MODULE_6		211	-0.471748	-2.04395	0	0.00153824	0.259	1358	tags=27%, list=12%, signal=31%
IL15_UP.V1_UP	IL15_UP.V1_UP		112	-0.503908	-2.04283	0	0.00156311	0.265	1486	tags=27%, list=13%, signal=30%
DER_IFN_BETA_RESPONSE_UP	DER_IFN_BETA_RESPONSE_UP		95	-0.525707	-2.04094	0	0.00161398	0.272	1630	tags=36%, list=14%, signal=41%
GSE26890_CXCR1_NEG_VS_POS_EFFECTOR_CD8_TCELL_UP	GSE26890_CXCR1_NEG_VS_POS_EFFECTOR_CD8_TCELL_UP		168	-0.477187	-2.03956	0	0.00164877	0.278	1896	tags=35%, list=16%, signal=41%
GSE36392_EOSINOPHIL_VS_NEUTROPHIL_IL25_TREATED_LUNG_UP	GSE36392_EOSINOPHIL_VS_NEUTROPHIL_IL25_TREATED_LUNG_UP		135	-0.497767	-2.03857	0	0.00164775	0.279	1395	tags=27%, list=12%, signal=31%
KEGG_CHEMOKINE_SIGNALING_PATHWAY	KEGG_CHEMOKINE_SIGNALING_PATHWAY		124	-0.503112	-2.03689	0	0.00171252	0.286	1847	tags=27%, list=16%, signal=32%
GSE9988_ANTI_TREM1_VS_LOW_LPS_MONOCYTE_DN	GSE9988_ANTI_TREM1_VS_LOW_LPS_MONOCYTE_DN		146	-0.491429	-2.0365	0	0.0017062	0.286	2509	tags=46%, list=22%, signal=58%
OSWALD_HEMATOPOIETIC_STEM_CELL_IN_COLLAGEN_GEL_UP	OSWALD_HEMATOPOIETIC_STEM_CELL_IN_COLLAGEN_GEL_UP		171	-0.486446	-2.03612	0	0.00170498	0.287	994	tags=21%, list=9%, signal=23%
PRAMOONJAGO_SOX4_TARGETS_UP	PRAMOONJAGO_SOX4_TARGETS_UP		49	-0.601046	-2.03565	0	0.00170876	0.289	2179	tags=45%, list=19%, signal=55%
GO_POSITIVE_REGULATION_OF_HORMONE_SECRETION	GO_POSITIVE_REGULATION_OF_HORMONE_SECRETION		58	-0.576121	-2.03362	0	0.00175793	0.294	2450	tags=45%, list=21%, signal=57%
GSE2706_2H_VS_8H_R848_STIM_DC_DN	GSE2706_2H_VS_8H_R848_STIM_DC_DN		126	-0.505831	-2.03292	0	0.00175654	0.295	1437	tags=30%, list=12%, signal=34%
GSE22140_HEALTHY_VS_ARTHRITIC_GERMFREE_MOUSE_CD4_TCELL_DN	GSE22140_HEALTHY_VS_ARTHRITIC_GERMFREE_MOUSE_CD4_TCELL_DN		165	-0.479422	-2.0323	0	0.00177003	0.299	1455	tags=31%, list=13%, signal=35%
CHR17Q12	CHR17Q12		45	-0.60877	-2.03191	0	0.00176364	0.299	1967	tags=33%, list=17%, signal=40%
TAKEDA_TARGETS_OF_NUP98_HOXA9_FUSION_8D_UP	TAKEDA_TARGETS_OF_NUP98_HOXA9_FUSION_8D_UP		91	-0.527336	-2.03132	0	0.00176707	0.3	1332	tags=34%, list=12%, signal=38%
GSE42021_TREG_PLN_VS_CD24HI_TREG_THYMUS_UP	GSE42021_TREG_PLN_VS_CD24HI_TREG_THYMUS_UP		156	-0.485086	-2.03107	0	0.00178552	0.305	2346	tags=40%, list=20%, signal=50%
GSE29618_MONOCYTE_VS_PDC_UP	GSE29618_MONOCYTE_VS_PDC_UP		154	-0.485847	-2.0292	0	0.00182326	0.312	1908	tags=30%, list=16%, signal=35%
GNF2_HLA_C	GNF2_HLA_C		44	-0.598532	-2.02805	0	0.00185587	0.319	1921	tags=45%, list=17%, signal=54%
GNF2_LYN	GNF2_LYN		27	-0.664367	-2.02787	0	0.00185409	0.32	2708	tags=56%, list=23%, signal=72%
GO_REGULATION_OF_ENDOPLASMIC_RETICULUM_STRESS_INDUCED_INTRINSIC_APOPTOTIC_SIGNALING_PATHWAY	GO_REGULATION_OF_ENDOPLASMIC_RETICULUM_STRESS_INDUCED_INTRINSIC_APOPTOTIC_SIGNALING_PATHWAY		26	-0.674542	-2.02734	0.0020284	0.00186701	0.322	385	tags=31%, list=3%, signal=32%
LIANG_SILENCED_BY_METHYLATION_2	LIANG_SILENCED_BY_METHYLATION_2		31	-0.656583	-2.02552	0	0.00195205	0.333	1054	tags=52%, list=9%, signal=57%
GSE7218_IGM_VS_IGG_SIGNAL_THGOUGH_ANTIGEN_BCELL_DN	GSE7218_IGM_VS_IGG_SIGNAL_THGOUGH_ANTIGEN_BCELL_DN		122	-0.504288	-2.02505	0	0.00196445	0.337	2071	tags=38%, list=18%, signal=45%
LEE_LIVER_CANCER_E2F1_UP	LEE_LIVER_CANCER_E2F1_UP		36	-0.630992	-2.02496	0	0.00195758	0.337	1390	tags=44%, list=12%, signal=50%
CHANG_IMMORTALIZED_BY_HPV31_DN	CHANG_IMMORTALIZED_BY_HPV31_DN		40	-0.617284	-2.02293	0	0.00202725	0.352	1052	tags=33%, list=9%, signal=36%
GSE34156_NOD2_LIGAND_VS_TLR1_TLR2_LIGAND_6H_TREATED_MONOCYTE_UP	GSE34156_NOD2_LIGAND_VS_TLR1_TLR2_LIGAND_6H_TREATED_MONOCYTE_UP		154	-0.483359	-2.02211	0	0.00203917	0.355	1279	tags=31%, list=11%, signal=35%
GSE12845_PRE_GC_VS_DARKZONE_GC_TONSIL_BCELL_UP	GSE12845_PRE_GC_VS_DARKZONE_GC_TONSIL_BCELL_UP		150	-0.482737	-2.02121	0	0.00204641	0.357	1669	tags=33%, list=14%, signal=38%
GSE24634_TREG_VS_TCONV_POST_DAY7_IL4_CONVERSION_DN	GSE24634_TREG_VS_TCONV_POST_DAY7_IL4_CONVERSION_DN		158	-0.48694	-2.02054	0	0.00206294	0.36	1747	tags=38%, list=15%, signal=44%
GSE16385_ROSIGLITAZONE_IFNG_TNF_VS_IL4_STIM_MACROPHAGE_UP	GSE16385_ROSIGLITAZONE_IFNG_TNF_VS_IL4_STIM_MACROPHAGE_UP		122	-0.506291	-2.01926	0	0.00208864	0.364	825	tags=20%, list=7%, signal=22%
JISON_SICKLE_CELL_DISEASE_UP	JISON_SICKLE_CELL_DISEASE_UP		142	-0.493633	-2.01891	0	0.00209567	0.366	1740	tags=36%, list=15%, signal=42%
GSE24634_IL4_VS_CTRL_TREATED_NAIVE_CD4_TCELL_DAY10_DN	GSE24634_IL4_VS_CTRL_TREATED_NAIVE_CD4_TCELL_DAY10_DN		168	-0.477259	-2.01789	0	0.00211657	0.371	1809	tags=30%, list=16%, signal=35%
GSE37319_WT_VS_RC3H1_KO_CD44LOW_CD8_TCELL_DN	GSE37319_WT_VS_RC3H1_KO_CD44LOW_CD8_TCELL_DN		73	-0.539309	-2.0175	0	0.00213746	0.373	1243	tags=26%, list=11%, signal=29%
GSE1432_CTRL_VS_IFNG_6H_MICROGLIA_DN	GSE1432_CTRL_VS_IFNG_6H_MICROGLIA_DN		169	-0.475416	-2.01712	0	0.00214887	0.377	1815	tags=33%, list=16%, signal=38%
SEKI_INFLAMMATORY_RESPONSE_LPS_UP	SEKI_INFLAMMATORY_RESPONSE_LPS_UP		53	-0.56827	-2.01595	0	0.00216488	0.381	889	tags=30%, list=8%, signal=33%
GSE14415_NATURAL_TREG_VS_FOXP3_KO_NATURAL_TREG_UP	GSE14415_NATURAL_TREG_VS_FOXP3_KO_NATURAL_TREG_UP		93	-0.515204	-2.01539	0	0.00217608	0.385	1217	tags=27%, list=11%, signal=30%
KEGG_GRAFT_VERSUS_HOST_DISEASE	KEGG_GRAFT_VERSUS_HOST_DISEASE		29	-0.649796	-2.01492	0	0.00218713	0.388	585	tags=34%, list=5%, signal=36%
GSE6259_33D1_POS_VS_DEC205_POS_FLT3L_INDUCED_SPLENIC_DC_UP	GSE6259_33D1_POS_VS_DEC205_POS_FLT3L_INDUCED_SPLENIC_DC_UP		119	-0.505516	-2.01438	0	0.00221223	0.392	950	tags=24%, list=8%, signal=26%
GSE17974_IL4_AND_ANTI_IL12_VS_UNTREATED_24H_ACT_CD4_TCELL_DN	GSE17974_IL4_AND_ANTI_IL12_VS_UNTREATED_24H_ACT_CD4_TCELL_DN		107	-0.507896	-2.01427	0	0.00220943	0.393	1371	tags=33%, list=12%, signal=37%
EGFR_UP.V1_UP	EGFR_UP.V1_UP		134	-0.493212	-2.01414	0	0.00220674	0.393	1506	tags=35%, list=13%, signal=40%
WIELAND_UP_BY_HBV_INFECTION	WIELAND_UP_BY_HBV_INFECTION		86	-0.533589	-2.01322	0	0.00220852	0.394	1831	tags=44%, list=16%, signal=52%
PARK_TRETINOIN_RESPONSE_AND_PML_RARA_FUSION	PARK_TRETINOIN_RESPONSE_AND_PML_RARA_FUSION		24	-0.681521	-2.01172	0	0.00224199	0.399	1783	tags=50%, list=15%, signal=59%
GSE42088_UNINF_VS_LEISHMANIA_INF_DC_2H_DN	GSE42088_UNINF_VS_LEISHMANIA_INF_DC_2H_DN		162	-0.479924	-2.01124	0	0.00223909	0.4	1649	tags=30%, list=14%, signal=35%
JECHLINGER_EPITHELIAL_TO_MESENCHYMAL_TRANSITION_DN	JECHLINGER_EPITHELIAL_TO_MESENCHYMAL_TRANSITION_DN		43	-0.604722	-2.01101	0	0.00223175	0.4	1612	tags=44%, list=14%, signal=51%
GO_REGULATION_OF_INFLAMMATORY_RESPONSE	GO_REGULATION_OF_INFLAMMATORY_RESPONSE		158	-0.481046	-2.01048	0	0.00224687	0.402	1167	tags=21%, list=10%, signal=23%
PODAR_RESPONSE_TO_ADAPHOSTIN_UP	PODAR_RESPONSE_TO_ADAPHOSTIN_UP		131	-0.495467	-2.00853	0	0.00234224	0.413	1985	tags=34%, list=17%, signal=41%
GSE360_L_DONOVANI_VS_M_TUBERCULOSIS_MAC_DN	GSE360_L_DONOVANI_VS_M_TUBERCULOSIS_MAC_DN		129	-0.495082	-2.0078	0	0.00236564	0.417	1007	tags=26%, list=9%, signal=28%
GO_REGULATION_OF_LIPID_BIOSYNTHETIC_PROCESS	GO_REGULATION_OF_LIPID_BIOSYNTHETIC_PROCESS		77	-0.538801	-2.00733	0	0.00237572	0.419	1651	tags=31%, list=14%, signal=36%
GSE21360_SECONDARY_VS_QUATERNARY_MEMORY_CD8_TCELL_UP	GSE21360_SECONDARY_VS_QUATERNARY_MEMORY_CD8_TCELL_UP		129	-0.504625	-2.0055	0	0.00243416	0.429	1723	tags=34%, list=15%, signal=40%
GSE17974_CTRL_VS_ACT_IL4_AND_ANTI_IL12_0.5H_CD4_TCELL_DN	GSE17974_CTRL_VS_ACT_IL4_AND_ANTI_IL12_0.5H_CD4_TCELL_DN		139	-0.486357	-2.00394	0	0.00248818	0.437	1754	tags=31%, list=15%, signal=36%
GSE11057_CD4_EFF_MEM_VS_PBMC_DN	GSE11057_CD4_EFF_MEM_VS_PBMC_DN		149	-0.473431	-2.00274	0	0.00254197	0.444	1940	tags=34%, list=17%, signal=40%
GSE18791_CTRL_VS_NEWCASTLE_VIRUS_DC_2H_DN	GSE18791_CTRL_VS_NEWCASTLE_VIRUS_DC_2H_DN		101	-0.512833	-2.00238	0	0.00255132	0.447	2004	tags=38%, list=17%, signal=45%
GSE2706_2H_VS_8H_LPS_STIM_DC_DN	GSE2706_2H_VS_8H_LPS_STIM_DC_DN		141	-0.483788	-2.00092	0	0.00259136	0.453	2404	tags=43%, list=21%, signal=54%
GNF2_HCK	GNF2_HCK		69	-0.546627	-2.0007	0	0.00260036	0.456	2814	tags=51%, list=24%, signal=67%
NABA_MATRISOME_ASSOCIATED	NABA_MATRISOME_ASSOCIATED		227	-0.459239	-2.00056	0	0.00259213	0.456	1262	tags=21%, list=11%, signal=23%
QI_PLASMACYTOMA_UP	QI_PLASMACYTOMA_UP		201	-0.461402	-1.9999	0	0.00258395	0.456	2264	tags=35%, list=20%, signal=43%
TIAN_TNF_SIGNALING_VIA_NFKB	TIAN_TNF_SIGNALING_VIA_NFKB		20	-0.703031	-1.99871	0	0.0026189	0.463	1181	tags=40%, list=10%, signal=44%
GO_POSITIVE_REGULATION_OF_PEPTIDYL_SERINE_PHOSPHORYLATION	GO_POSITIVE_REGULATION_OF_PEPTIDYL_SERINE_PHOSPHORYLATION		51	-0.572244	-1.99593	0	0.00276115	0.482	1632	tags=35%, list=14%, signal=41%
ZHANG_ANTIVIRAL_RESPONSE_TO_RIBAVIRIN_UP	ZHANG_ANTIVIRAL_RESPONSE_TO_RIBAVIRIN_UP		22	-0.694194	-1.99499	0	0.00278251	0.488	762	tags=36%, list=7%, signal=39%
GSE42021_CD24HI_TREG_VS_CD24HI_TCONV_THYMUS_DN	GSE42021_CD24HI_TREG_VS_CD24HI_TCONV_THYMUS_DN		156	-0.471458	-1.99492	0	0.00277384	0.488	1829	tags=32%, list=16%, signal=38%
KYNG_DNA_DAMAGE_BY_GAMMA_RADIATION	KYNG_DNA_DAMAGE_BY_GAMMA_RADIATION		50	-0.573335	-1.99481	0	0.0027695	0.489	748	tags=24%, list=6%, signal=26%
JEPSEN_SMRT_TARGETS	JEPSEN_SMRT_TARGETS		20	-0.709544	-1.99406	0	0.00279923	0.497	382	tags=20%, list=3%, signal=21%
GNF2_VAV1	GNF2_VAV1		36	-0.626166	-1.99384	0	0.00279482	0.497	1921	tags=47%, list=17%, signal=56%
GSE16755_CTRL_VS_IFNA_TREATED_MAC_DN	GSE16755_CTRL_VS_IFNA_TREATED_MAC_DN		163	-0.473293	-1.9938	0	0.00279886	0.498	1962	tags=36%, list=17%, signal=43%
GO_POSITIVE_REGULATION_OF_ERK1_AND_ERK2_CASCADE	GO_POSITIVE_REGULATION_OF_ERK1_AND_ERK2_CASCADE		92	-0.519479	-1.99337	0	0.00279455	0.499	1212	tags=30%, list=10%, signal=34%
GNF2_FGR	GNF2_FGR		29	-0.649226	-1.98996	0	0.00291616	0.513	1541	tags=41%, list=13%, signal=48%
KAECH_DAY8_EFF_VS_MEMORY_CD8_TCELL_DN	KAECH_DAY8_EFF_VS_MEMORY_CD8_TCELL_DN		167	-0.474973	-1.98934	0	0.0029239	0.514	1764	tags=31%, list=15%, signal=36%
GSE44649_WT_VS_MIR155_KO_ACTIVATED_CD8_TCELL_UP	GSE44649_WT_VS_MIR155_KO_ACTIVATED_CD8_TCELL_UP		157	-0.480058	-1.98882	0	0.00294839	0.516	1893	tags=36%, list=16%, signal=43%
GO_ER_TO_GOLGI_TRANSPORT_VESICLE_MEMBRANE	GO_ER_TO_GOLGI_TRANSPORT_VESICLE_MEMBRANE		46	-0.597702	-1.98856	0	0.00294775	0.517	1763	tags=39%, list=15%, signal=46%
GSE3982_CTRL_VS_LPS_4H_MAC_DN	GSE3982_CTRL_VS_LPS_4H_MAC_DN		155	-0.481512	-1.98751	0	0.00297219	0.521	1190	tags=28%, list=10%, signal=31%
GSE36527_CD69_NEG_VS_POS_TREG_CD62L_LOS_KLRG1_NEG_UP	GSE36527_CD69_NEG_VS_POS_TREG_CD62L_LOS_KLRG1_NEG_UP		150	-0.476911	-1.98744	0	0.00296323	0.521	1325	tags=29%, list=11%, signal=32%
GSE29618_MONOCYTE_VS_MDC_UP	GSE29618_MONOCYTE_VS_MDC_UP		152	-0.483655	-1.98743	0	0.00295434	0.521	2051	tags=36%, list=18%, signal=43%
SHAFFER_IRF4_TARGETS_IN_PLASMA_CELL_VS_MATURE_B_LYMPHOCYTE	SHAFFER_IRF4_TARGETS_IN_PLASMA_CELL_VS_MATURE_B_LYMPHOCYTE		61	-0.547017	-1.98692	0	0.00297424	0.524	1917	tags=38%, list=17%, signal=45%
GSE42021_CD24INT_VS_CD24LOW_TCONV_THYMUS_DN	GSE42021_CD24INT_VS_CD24LOW_TCONV_THYMUS_DN		151	-0.482569	-1.98687	0	0.00296536	0.524	1837	tags=34%, list=16%, signal=40%
GSE43863_NAIVE_VS_MEMORY_TH1_CD4_TCELL_D150_LCMV_UP	GSE43863_NAIVE_VS_MEMORY_TH1_CD4_TCELL_D150_LCMV_UP		86	-0.521919	-1.98554	0	0.00302186	0.53	1437	tags=40%, list=12%, signal=45%
GSE18791_CTRL_VS_NEWCASTLE_VIRUS_DC_18H_DN	GSE18791_CTRL_VS_NEWCASTLE_VIRUS_DC_18H_DN		124	-0.487569	-1.98527	0	0.00302098	0.531	1593	tags=33%, list=14%, signal=38%
GSE41176_WT_VS_TAK1_KO_ANTI_IGM_STIM_BCELL_3H_UP	GSE41176_WT_VS_TAK1_KO_ANTI_IGM_STIM_BCELL_3H_UP		118	-0.494866	-1.9842	0	0.00306088	0.537	525	tags=14%, list=5%, signal=14%
DELACROIX_RAR_TARGETS_UP	DELACROIX_RAR_TARGETS_UP		26	-0.6557	-1.98356	0	0.00309242	0.54	1678	tags=38%, list=14%, signal=45%
GNF2_CASP1	GNF2_CASP1		91	-0.513595	-1.98345	0	0.00308742	0.54	1696	tags=35%, list=15%, signal=41%
GROSS_HYPOXIA_VIA_ELK3_AND_HIF1A_UP	GROSS_HYPOXIA_VIA_ELK3_AND_HIF1A_UP		114	-0.497647	-1.98328	0	0.00309048	0.543	1489	tags=27%, list=13%, signal=31%
GO_TRANSCRIPTIONAL_ACTIVATOR_ACTIVITY_RNA_POLYMERASE_II_CORE_PROMOTER_PROXIMAL_REGION_SEQUENCE_SPECIFIC_BINDING	GO_TRANSCRIPTIONAL_ACTIVATOR_ACTIVITY_RNA_POLYMERASE_II_CORE_PROMOTER_PROXIMAL_REGION_SEQUENCE_SPECIFIC_BINDING		108	-0.501887	-1.98293	0	0.00308544	0.544	792	tags=18%, list=7%, signal=19%
GO_TAXIS	GO_TAXIS		222	-0.456316	-1.98044	0	0.00316464	0.554	2246	tags=33%, list=19%, signal=40%
GO_PEPTIDYL_ASPARAGINE_MODIFICATION	GO_PEPTIDYL_ASPARAGINE_MODIFICATION		32	-0.630612	-1.97937	0	0.00318332	0.556	1219	tags=34%, list=11%, signal=38%
GSE11057_CD4_CENT_MEM_VS_PBMC_DN	GSE11057_CD4_CENT_MEM_VS_PBMC_DN		138	-0.485803	-1.97753	0	0.00325372	0.565	1972	tags=32%, list=17%, signal=38%
GSE2405_S_AUREUS_VS_A_PHAGOCYTOPHILUM_NEUTROPHIL_UP	GSE2405_S_AUREUS_VS_A_PHAGOCYTOPHILUM_NEUTROPHIL_UP		122	-0.492297	-1.97734	0	0.00325227	0.566	1893	tags=35%, list=16%, signal=42%
STTTCRNTTT_IRF_Q6	STTTCRNTTT_IRF_Q6		127	-0.48409	-1.9764	0	0.00329827	0.571	1279	tags=28%, list=11%, signal=32%
GARGALOVIC_RESPONSE_TO_OXIDIZED_PHOSPHOLIPIDS_TURQUOISE_UP	GARGALOVIC_RESPONSE_TO_OXIDIZED_PHOSPHOLIPIDS_TURQUOISE_UP		60	-0.561003	-1.97351	0	0.00341881	0.589	1343	tags=28%, list=12%, signal=32%
REACTOME_CHEMOKINE_RECEPTORS_BIND_CHEMOKINES	REACTOME_CHEMOKINE_RECEPTORS_BIND_CHEMOKINES		24	-0.679763	-1.97219	0	0.00347984	0.596	1212	tags=29%, list=10%, signal=33%
GSE9006_HEALTHY_VS_TYPE_1_DIABETES_PBMC_AT_DX_DN	GSE9006_HEALTHY_VS_TYPE_1_DIABETES_PBMC_AT_DX_DN		133	-0.476995	-1.97195	0	0.00348952	0.597	854	tags=20%, list=7%, signal=21%
VILIMAS_NOTCH1_TARGETS_UP	VILIMAS_NOTCH1_TARGETS_UP		39	-0.601559	-1.97102	0	0.0035228	0.603	1133	tags=28%, list=10%, signal=31%
UROSEVIC_RESPONSE_TO_IMIQUIMOD	UROSEVIC_RESPONSE_TO_IMIQUIMOD		19	-0.704739	-1.96959	0	0.00358322	0.608	1279	tags=53%, list=11%, signal=59%
GSE33425_CD161_INT_VS_NEG_CD8_TCELL_DN	GSE33425_CD161_INT_VS_NEG_CD8_TCELL_DN		181	-0.458375	-1.96895	0	0.00360038	0.611	2254	tags=40%, list=19%, signal=49%
SEITZ_NEOPLASTIC_TRANSFORMATION_BY_8P_DELETION_UP	SEITZ_NEOPLASTIC_TRANSFORMATION_BY_8P_DELETION_UP		48	-0.56922	-1.96829	0	0.00364072	0.615	1437	tags=46%, list=12%, signal=52%
GSE37534_UNTREATED_VS_ROSIGLITAZONE_TREATED_CD4_TCELL_PPARG1_AND_FOXP3_TRASDUCED_DN	GSE37534_UNTREATED_VS_ROSIGLITAZONE_TREATED_CD4_TCELL_PPARG1_AND_FOXP3_TRASDUCED_DN		158	-0.472973	-1.9679	0	0.0036537	0.62	1925	tags=36%, list=17%, signal=43%
GO_POSITIVE_REGULATION_OF_LIPID_METABOLIC_PROCESS	GO_POSITIVE_REGULATION_OF_LIPID_METABOLIC_PROCESS		75	-0.531651	-1.96649	0	0.00375895	0.629	1384	tags=32%, list=12%, signal=36%
GSE41867_DAY6_EFFECTOR_VS_DAY30_EXHAUSTED_CD8_TCELL_LCMV_CLONE13_UP	GSE41867_DAY6_EFFECTOR_VS_DAY30_EXHAUSTED_CD8_TCELL_LCMV_CLONE13_UP		146	-0.478787	-1.96538	0	0.00382147	0.638	1372	tags=26%, list=12%, signal=29%
ICHIBA_GRAFT_VERSUS_HOST_DISEASE_35D_UP	ICHIBA_GRAFT_VERSUS_HOST_DISEASE_35D_UP		89	-0.512125	-1.96514	0	0.00382604	0.639	1538	tags=34%, list=13%, signal=39%
GSE36476_CTRL_VS_TSST_ACT_72H_MEMORY_CD4_TCELL_YOUNG_UP	GSE36476_CTRL_VS_TSST_ACT_72H_MEMORY_CD4_TCELL_YOUNG_UP		159	-0.466943	-1.96422	0	0.00384589	0.64	2004	tags=38%, list=17%, signal=45%
GSE34156_UNTREATED_VS_6H_NOD2_AND_TLR1_TLR2_LIGAND_TREATED_MONOCYTE_DN	GSE34156_UNTREATED_VS_6H_NOD2_AND_TLR1_TLR2_LIGAND_TREATED_MONOCYTE_DN		123	-0.489314	-1.96369	0	0.00385807	0.642	1209	tags=31%, list=10%, signal=34%
MIKKELSEN_IPS_LCP_WITH_H3K4ME3	MIKKELSEN_IPS_LCP_WITH_H3K4ME3		75	-0.527373	-1.96176	0	0.00390434	0.646	2002	tags=33%, list=17%, signal=40%
TAKEDA_TARGETS_OF_NUP98_HOXA9_FUSION_16D_UP	TAKEDA_TARGETS_OF_NUP98_HOXA9_FUSION_16D_UP		106	-0.499633	-1.96034	0	0.00394685	0.649	2031	tags=41%, list=18%, signal=49%
GSE4590_SMALL_VS_LARGE_PRE_BCELL_UP	GSE4590_SMALL_VS_LARGE_PRE_BCELL_UP		127	-0.485144	-1.96022	0	0.00393973	0.649	2117	tags=32%, list=18%, signal=39%
GO_POSITIVE_REGULATION_OF_CELL_KILLING	GO_POSITIVE_REGULATION_OF_CELL_KILLING		29	-0.636228	-1.95968	0	0.00394783	0.649	909	tags=38%, list=8%, signal=41%
GSE7348_UNSTIM_VS_LPS_STIM_MACROPHAGE_DN	GSE7348_UNSTIM_VS_LPS_STIM_MACROPHAGE_DN		126	-0.481311	-1.95558	0	0.00421933	0.668	1950	tags=38%, list=17%, signal=45%
GSE42088_UNINF_VS_LEISHMANIA_INF_DC_24H_UP	GSE42088_UNINF_VS_LEISHMANIA_INF_DC_24H_UP		178	-0.458301	-1.95323	0	0.00430142	0.672	1231	tags=21%, list=11%, signal=24%
LIN_SILENCED_BY_TUMOR_MICROENVIRONMENT	LIN_SILENCED_BY_TUMOR_MICROENVIRONMENT		44	-0.591884	-1.95236	0	0.00434198	0.676	622	tags=23%, list=5%, signal=24%
LENAOUR_DENDRITIC_CELL_MATURATION_UP	LENAOUR_DENDRITIC_CELL_MATURATION_UP		84	-0.51245	-1.95215	0	0.00436355	0.678	1248	tags=27%, list=11%, signal=30%
KEGG_TYPE_I_DIABETES_MELLITUS	KEGG_TYPE_I_DIABETES_MELLITUS		33	-0.622146	-1.9521	0	0.00435172	0.678	585	tags=36%, list=5%, signal=38%
GSE7852_TREG_VS_TCONV_THYMUS_UP	GSE7852_TREG_VS_TCONV_THYMUS_UP		151	-0.470533	-1.95057	0	0.00443251	0.687	1128	tags=25%, list=10%, signal=28%
BIOCARTA_CDMAC_PATHWAY	BIOCARTA_CDMAC_PATHWAY		15	-0.750876	-1.95046	0.002079	0.00443171	0.689	592	tags=33%, list=5%, signal=35%
LIU_VAV3_PROSTATE_CARCINOGENESIS_UP	LIU_VAV3_PROSTATE_CARCINOGENESIS_UP		54	-0.553867	-1.95007	0	0.00445314	0.691	1016	tags=30%, list=9%, signal=32%
GSE7509_UNSTIM_VS_IFNA_STIM_IMMATURE_DC_DN	GSE7509_UNSTIM_VS_IFNA_STIM_IMMATURE_DC_DN		135	-0.474468	-1.94962	0	0.00446312	0.692	2059	tags=39%, list=18%, signal=47%
MODULE_223	MODULE_223		94	-0.500981	-1.94912	0	0.0044733	0.693	2264	tags=40%, list=20%, signal=50%
PLASARI_TGFB1_TARGETS_10HR_UP	PLASARI_TGFB1_TARGETS_10HR_UP		113	-0.488665	-1.94876	0	0.00449439	0.698	2107	tags=41%, list=18%, signal=49%
GSE29618_MONOCYTE_VS_MDC_DAY7_FLU_VACCINE_UP	GSE29618_MONOCYTE_VS_MDC_DAY7_FLU_VACCINE_UP		152	-0.472919	-1.94797	0	0.00454812	0.702	1950	tags=31%, list=17%, signal=37%
GSE25088_ROSIGLITAZONE_VS_IL4_AND_ROSIGLITAZONE_STIM_STAT6_KO_MACROPHAGE_DAY10_DN	GSE25088_ROSIGLITAZONE_VS_IL4_AND_ROSIGLITAZONE_STIM_STAT6_KO_MACROPHAGE_DAY10_DN		162	-0.461843	-1.94745	0	0.00455414	0.704	2057	tags=35%, list=18%, signal=41%
GSE37534_UNTREATED_VS_PIOGLITAZONE_TREATED_CD4_TCELL_PPARG1_AND_FOXP3_TRASDUCED_DN	GSE37534_UNTREATED_VS_PIOGLITAZONE_TREATED_CD4_TCELL_PPARG1_AND_FOXP3_TRASDUCED_DN		175	-0.4547	-1.94694	0	0.00457117	0.706	1437	tags=30%, list=12%, signal=34%
GSE16522_MEMORY_VS_NAIVE_ANTI_CD3CD28_STIM_CD8_TCELL_DN	GSE16522_MEMORY_VS_NAIVE_ANTI_CD3CD28_STIM_CD8_TCELL_DN		161	-0.468906	-1.94678	0	0.0045627	0.707	972	tags=23%, list=8%, signal=25%
MEL18_DN.V1_DN	MEL18_DN.V1_DN		74	-0.51709	-1.94631	0	0.00458666	0.71	1493	tags=35%, list=13%, signal=40%
GSE19888_ADENOSINE_A3R_INH_VS_TCELL_MEMBRANES_ACT_MAST_CELL_UP	GSE19888_ADENOSINE_A3R_INH_VS_TCELL_MEMBRANES_ACT_MAST_CELL_UP		141	-0.480137	-1.94629	0	0.00457462	0.71	1279	tags=30%, list=11%, signal=33%
GNF2_CD1D	GNF2_CD1D		32	-0.611699	-1.946	0.0021645	0.00458061	0.712	1541	tags=44%, list=13%, signal=50%
CASORELLI_ACUTE_PROMYELOCYTIC_LEUKEMIA_UP	CASORELLI_ACUTE_PROMYELOCYTIC_LEUKEMIA_UP		132	-0.485149	-1.94582	0	0.00457591	0.713	1591	tags=28%, list=14%, signal=32%
CREB_Q2	CREB_Q2		193	-0.457919	-1.94446	0	0.00464608	0.716	1556	tags=23%, list=13%, signal=26%
GSE6269_FLU_VS_E_COLI_INF_PBMC_UP	GSE6269_FLU_VS_E_COLI_INF_PBMC_UP		138	-0.467748	-1.94421	0	0.00464118	0.716	2002	tags=30%, list=17%, signal=35%
GSE17974_0H_VS_0.5H_IN_VITRO_ACT_CD4_TCELL_DN	GSE17974_0H_VS_0.5H_IN_VITRO_ACT_CD4_TCELL_DN		113	-0.479492	-1.94282	0	0.00475707	0.722	1713	tags=29%, list=15%, signal=34%
GSE9988_ANTI_TREM1_VS_VEHICLE_TREATED_MONOCYTES_UP	GSE9988_ANTI_TREM1_VS_VEHICLE_TREATED_MONOCYTES_UP		140	-0.469898	-1.9415	0	0.00482678	0.732	2489	tags=43%, list=21%, signal=54%
GSE34006_A2AR_KO_VS_A2AR_AGONIST_TREATED_TREG_UP	GSE34006_A2AR_KO_VS_A2AR_AGONIST_TREATED_TREG_UP		170	-0.459025	-1.94138	0	0.00482852	0.734	1647	tags=31%, list=14%, signal=36%
GSE39864_WT_VS_GATA3_KO_TREG_UP	GSE39864_WT_VS_GATA3_KO_TREG_UP		126	-0.477638	-1.94111	0	0.00483751	0.736	1674	tags=33%, list=14%, signal=38%
GO_REGULATION_OF_LEUKOCYTE_MEDIATED_CYTOTOXICITY	GO_REGULATION_OF_LEUKOCYTE_MEDIATED_CYTOTOXICITY		40	-0.591974	-1.94087	0	0.00484622	0.738	909	tags=33%, list=8%, signal=35%
GSE6269_FLU_VS_STAPH_AUREUS_INF_PBMC_DN	GSE6269_FLU_VS_STAPH_AUREUS_INF_PBMC_DN		135	-0.479245	-1.94036	0	0.0048618	0.74	1800	tags=30%, list=16%, signal=36%
GSE7852_LN_VS_FAT_TCONV_DN	GSE7852_LN_VS_FAT_TCONV_DN		155	-0.462555	-1.94031	0	0.00485293	0.74	1764	tags=29%, list=15%, signal=34%
GSE25123_WT_VS_PPARG_KO_MACROPHAGE_UP	GSE25123_WT_VS_PPARG_KO_MACROPHAGE_UP		134	-0.481098	-1.93961	0	0.00490341	0.746	2211	tags=36%, list=19%, signal=44%
LABBE_TGFB1_TARGETS_UP	LABBE_TGFB1_TARGETS_UP		57	-0.53712	-1.93944	0	0.00489792	0.747	1413	tags=35%, list=12%, signal=40%
PID_REG_GR_PATHWAY	PID_REG_GR_PATHWAY		57	-0.54942	-1.93925	0	0.00488901	0.748	1126	tags=19%, list=10%, signal=21%
GO_REGULATION_OF_RESPONSE_TO_WOUNDING	GO_REGULATION_OF_RESPONSE_TO_WOUNDING		216	-0.446977	-1.93771	0	0.00503945	0.763	1170	tags=20%, list=10%, signal=22%
HOWLIN_PUBERTAL_MAMMARY_GLAND	HOWLIN_PUBERTAL_MAMMARY_GLAND		35	-0.604904	-1.93765	0	0.00503377	0.764	1777	tags=49%, list=15%, signal=57%
GO_REGULATION_OF_ERK1_AND_ERK2_CASCADE	GO_REGULATION_OF_ERK1_AND_ERK2_CASCADE		136	-0.475653	-1.93671	0	0.00513121	0.77	2174	tags=37%, list=19%, signal=45%
VANHARANTA_UTERINE_FIBROID_DN	VANHARANTA_UTERINE_FIBROID_DN		43	-0.57319	-1.93657	0	0.0051218	0.77	1192	tags=30%, list=10%, signal=34%
HORTON_SREBF_TARGETS	HORTON_SREBF_TARGETS		23	-0.667908	-1.93656	0.00209644	0.005109	0.77	1912	tags=48%, list=17%, signal=57%
GAURNIER_PSMD4_TARGETS	GAURNIER_PSMD4_TARGETS		51	-0.564522	-1.93555	0	0.00517487	0.774	585	tags=24%, list=5%, signal=25%
GO_TRANSCRIPTIONAL_ACTIVATOR_ACTIVITY_RNA_POLYMERASE_II_TRANSCRIPTION_REGULATORY_REGION_SEQUENCE_SPECIFIC_BINDING	GO_TRANSCRIPTIONAL_ACTIVATOR_ACTIVITY_RNA_POLYMERASE_II_TRANSCRIPTION_REGULATORY_REGION_SEQUENCE_SPECIFIC_BINDING		154	-0.466081	-1.93522	0	0.00520626	0.775	844	tags=19%, list=7%, signal=20%
GGCACAT_MIR455	GGCACAT_MIR455		41	-0.579029	-1.93444	0	0.0052479	0.778	1821	tags=37%, list=16%, signal=43%
GSE42088_2H_VS_24H_LEISHMANIA_INF_DC_UP	GSE42088_2H_VS_24H_LEISHMANIA_INF_DC_UP		168	-0.466969	-1.93347	0	0.00530277	0.784	1695	tags=29%, list=15%, signal=34%
GSE8835_CD4_VS_CD8_TCELL_CLL_PATIENT_UP	GSE8835_CD4_VS_CD8_TCELL_CLL_PATIENT_UP		126	-0.477753	-1.93333	0	0.0052965	0.784	1694	tags=34%, list=15%, signal=40%
MODULE_45	MODULE_45		398	-0.414599	-1.93325	0	0.00528345	0.784	1843	tags=30%, list=16%, signal=35%
GSE7548_NAIVE_VS_DAY7_PCC_IMMUNIZATION_CD4_TCELL_DN	GSE7548_NAIVE_VS_DAY7_PCC_IMMUNIZATION_CD4_TCELL_DN		178	-0.451933	-1.93274	0	0.00531093	0.787	1279	tags=26%, list=11%, signal=29%
MODULE_1	MODULE_1		219	-0.444287	-1.93272	0	0.00530124	0.787	1428	tags=24%, list=12%, signal=27%
GSE10325_LUPUS_CD4_TCELL_VS_LUPUS_MYELOID_DN	GSE10325_LUPUS_CD4_TCELL_VS_LUPUS_MYELOID_DN		161	-0.458448	-1.93174	0	0.00535882	0.791	2204	tags=39%, list=19%, signal=47%
GNF2_CD14	GNF2_CD14		26	-0.643434	-1.92997	0	0.00546589	0.8	1541	tags=46%, list=13%, signal=53%
GO_POSITIVE_REGULATION_OF_INSULIN_SECRETION_INVOLVED_IN_CELLULAR_RESPONSE_TO_GLUCOSE_STIMULUS	GO_POSITIVE_REGULATION_OF_INSULIN_SECRETION_INVOLVED_IN_CELLULAR_RESPONSE_TO_GLUCOSE_STIMULUS		16	-0.731364	-1.92977	0.00446429	0.00545928	0.8	1046	tags=44%, list=9%, signal=48%
GO_SMOOTH_ENDOPLASMIC_RETICULUM	GO_SMOOTH_ENDOPLASMIC_RETICULUM		21	-0.687587	-1.92946	0.00211416	0.00545277	0.8	1973	tags=48%, list=17%, signal=57%
ALK_DN.V1_UP	ALK_DN.V1_UP		60	-0.533543	-1.92727	0	0.00562217	0.813	2066	tags=42%, list=18%, signal=50%
ABBUD_LIF_SIGNALING_1_UP	ABBUD_LIF_SIGNALING_1_UP		29	-0.633379	-1.92714	0	0.00561858	0.814	1678	tags=45%, list=14%, signal=52%
GO_REGULATION_OF_STEROID_BIOSYNTHETIC_PROCESS	GO_REGULATION_OF_STEROID_BIOSYNTHETIC_PROCESS		28	-0.638289	-1.92699	0.00215983	0.00560834	0.815	879	tags=29%, list=8%, signal=31%
LEE_AGING_CEREBELLUM_UP	LEE_AGING_CEREBELLUM_UP		51	-0.543062	-1.92651	0	0.00563112	0.817	1038	tags=25%, list=9%, signal=28%
KIM_WT1_TARGETS_8HR_UP	KIM_WT1_TARGETS_8HR_UP		113	-0.480639	-1.92623	0	0.00563404	0.818	2233	tags=38%, list=19%, signal=47%
BILBAN_B_CLL_LPL_DN	BILBAN_B_CLL_LPL_DN		36	-0.609333	-1.92622	0	0.00562056	0.818	739	tags=31%, list=6%, signal=33%
IRF_Q6	IRF_Q6		169	-0.457674	-1.92379	0	0.00580418	0.827	1851	tags=34%, list=16%, signal=40%
MISHRA_CARCINOMA_ASSOCIATED_FIBROBLAST_UP	MISHRA_CARCINOMA_ASSOCIATED_FIBROBLAST_UP		15	-0.747654	-1.92361	0	0.00580343	0.827	11	tags=13%, list=0%, signal=13%
GSE9988_ANTI_TREM1_VS_LPS_MONOCYTE_DN	GSE9988_ANTI_TREM1_VS_LPS_MONOCYTE_DN		147	-0.4647	-1.92336	0	0.00579613	0.827	1824	tags=36%, list=16%, signal=42%
GO_POSITIVE_REGULATION_OF_PEPTIDE_SECRETION	GO_POSITIVE_REGULATION_OF_PEPTIDE_SECRETION		47	-0.562084	-1.9219	0	0.00588955	0.833	2368	tags=45%, list=20%, signal=56%
ICHIBA_GRAFT_VERSUS_HOST_DISEASE_D7_UP	ICHIBA_GRAFT_VERSUS_HOST_DISEASE_D7_UP		81	-0.512015	-1.92153	0	0.00589838	0.834	1437	tags=35%, list=12%, signal=39%
BOYAULT_LIVER_CANCER_SUBCLASS_G5_DN	BOYAULT_LIVER_CANCER_SUBCLASS_G5_DN		26	-0.642733	-1.92031	0.00218341	0.00599773	0.839	2156	tags=38%, list=19%, signal=47%
GO_REGULATION_OF_INTERLEUKIN_8_PRODUCTION	GO_REGULATION_OF_INTERLEUKIN_8_PRODUCTION		38	-0.575509	-1.91987	0	0.0060418	0.844	1309	tags=32%, list=11%, signal=35%
GO_REGULATION_OF_STEROID_METABOLIC_PROCESS	GO_REGULATION_OF_STEROID_METABOLIC_PROCESS		40	-0.593601	-1.9196	0.00210526	0.00604681	0.845	1651	tags=35%, list=14%, signal=41%
YAN_ESCAPE_FROM_ANOIKIS	YAN_ESCAPE_FROM_ANOIKIS		19	-0.694179	-1.91954	0	0.00603583	0.845	343	tags=37%, list=3%, signal=38%
GO_POSITIVE_REGULATION_OF_LEUKOCYTE_MEDIATED_IMMUNITY	GO_POSITIVE_REGULATION_OF_LEUKOCYTE_MEDIATED_IMMUNITY		63	-0.527589	-1.91952	0	0.00602173	0.845	1046	tags=29%, list=9%, signal=31%
GSE35685_CD34POS_CD38NEG_VS_CD34POS_CD10POS_BONE_MARROW_DN	GSE35685_CD34POS_CD38NEG_VS_CD34POS_CD10POS_BONE_MARROW_DN		176	-0.451161	-1.91743	0	0.00622819	0.856	1979	tags=31%, list=17%, signal=36%
GSE24634_IL4_VS_CTRL_TREATED_NAIVE_CD4_TCELL_DAY5_DN	GSE24634_IL4_VS_CTRL_TREATED_NAIVE_CD4_TCELL_DAY5_DN		149	-0.465134	-1.91731	0	0.0062137	0.856	2017	tags=35%, list=17%, signal=42%
GNF2_STAT6	GNF2_STAT6		77	-0.509513	-1.91684	0	0.00623451	0.858	2770	tags=45%, list=24%, signal=59%
GSE28783_CTRL_ANTI_MIR_VS_UNTREATED_ATHEROSCLEROSIS_MACROPHAGE_DN	GSE28783_CTRL_ANTI_MIR_VS_UNTREATED_ATHEROSCLEROSIS_MACROPHAGE_DN		121	-0.473989	-1.91499	0	0.00639517	0.866	1498	tags=27%, list=13%, signal=31%
PHONG_TNF_RESPONSE_VIA_P38_COMPLETE	PHONG_TNF_RESPONSE_VIA_P38_COMPLETE		188	-0.445906	-1.91476	0	0.0063994	0.867	1803	tags=25%, list=16%, signal=29%
GSE34205_RSV_VS_FLU_INF_INFANT_PBMC_DN	GSE34205_RSV_VS_FLU_INF_INFANT_PBMC_DN		146	-0.463376	-1.91467	0	0.00639093	0.867	1998	tags=32%, list=17%, signal=38%
AMIT_DELAYED_EARLY_GENES	AMIT_DELAYED_EARLY_GENES		17	-0.701905	-1.91426	0.00211864	0.00641725	0.868	1413	tags=53%, list=12%, signal=60%
GSE10325_CD4_TCELL_VS_BCELL_DN	GSE10325_CD4_TCELL_VS_BCELL_DN		156	-0.460579	-1.91424	0	0.00640253	0.868	2156	tags=39%, list=19%, signal=47%
GO_ANTIGEN_PROCESSING_AND_PRESENTATION_OF_EXOGENOUS_PEPTIDE_ANTIGEN_VIA_MHC_CLASS_I	GO_ANTIGEN_PROCESSING_AND_PRESENTATION_OF_EXOGENOUS_PEPTIDE_ANTIGEN_VIA_MHC_CLASS_I		61	-0.529539	-1.91321	0	0.00646338	0.872	1132	tags=26%, list=10%, signal=29%
GO_REGULATION_OF_HEART_CONTRACTION	GO_REGULATION_OF_HEART_CONTRACTION		91	-0.499152	-1.91297	0	0.00646423	0.872	3017	tags=51%, list=26%, signal=68%
MODULE_436	MODULE_436		93	-0.496136	-1.91264	0	0.00649004	0.872	1437	tags=29%, list=12%, signal=33%
GNF2_INPP5D	GNF2_INPP5D		43	-0.576088	-1.91245	0	0.00649403	0.872	1992	tags=44%, list=17%, signal=53%
BROWNE_HCMV_INFECTION_1HR_UP	BROWNE_HCMV_INFECTION_1HR_UP		26	-0.645794	-1.91196	0	0.00651651	0.873	1610	tags=38%, list=14%, signal=45%
REACTOME_O_LINKED_GLYCOSYLATION_OF_MUCINS	REACTOME_O_LINKED_GLYCOSYLATION_OF_MUCINS		22	-0.672569	-1.91096	0	0.00659813	0.878	669	tags=32%, list=6%, signal=34%
GSE19401_NAIVE_VS_IMMUNIZED_MOUSE_PLN_FOLLICULAR_DC_UP	GSE19401_NAIVE_VS_IMMUNIZED_MOUSE_PLN_FOLLICULAR_DC_UP		164	-0.452671	-1.90945	0	0.00669484	0.881	1384	tags=27%, list=12%, signal=31%
GO_DEFENSE_RESPONSE_TO_VIRUS	GO_DEFENSE_RESPONSE_TO_VIRUS		116	-0.476388	-1.90939	0	0.00669214	0.881	1527	tags=30%, list=13%, signal=34%
PID_PRL_SIGNALING_EVENTS_PATHWAY	PID_PRL_SIGNALING_EVENTS_PATHWAY		22	-0.661139	-1.90936	0	0.0066771	0.881	1478	tags=41%, list=13%, signal=47%
DER_IFN_ALPHA_RESPONSE_UP	DER_IFN_ALPHA_RESPONSE_UP		69	-0.520117	-1.90745	0	0.00685903	0.887	1437	tags=38%, list=12%, signal=43%
GSE37301_PRO_BCELL_VS_GRANULOCYTE_MONOCYTE_PROGENITOR_UP	GSE37301_PRO_BCELL_VS_GRANULOCYTE_MONOCYTE_PROGENITOR_UP		87	-0.503614	-1.90736	0	0.00685903	0.888	778	tags=20%, list=7%, signal=21%
RELA_DN.V1_UP	RELA_DN.V1_UP		88	-0.501816	-1.9073	0	0.00685596	0.888	1917	tags=28%, list=17%, signal=34%
GAVIN_FOXP3_TARGETS_CLUSTER_P7	GAVIN_FOXP3_TARGETS_CLUSTER_P7		62	-0.520061	-1.90694	0	0.0068772	0.889	2078	tags=37%, list=18%, signal=45%
GSE9601_NFKB_INHIBITOR_VS_PI3K_INHIBITOR_TREATED_HCMV_INF_MONOCYTE_DN	GSE9601_NFKB_INHIBITOR_VS_PI3K_INHIBITOR_TREATED_HCMV_INF_MONOCYTE_DN		136	-0.461509	-1.90692	0	0.00686499	0.89	1419	tags=33%, list=12%, signal=37%
GSE2770_IL12_AND_TGFB_VS_IL4_TREATED_ACT_CD4_TCELL_48H_DN	GSE2770_IL12_AND_TGFB_VS_IL4_TREATED_ACT_CD4_TCELL_48H_DN		108	-0.485632	-1.90686	0	0.00685287	0.89	2561	tags=43%, list=22%, signal=54%
KEGG_ASTHMA	KEGG_ASTHMA		17	-0.709082	-1.90627	0	0.00690453	0.893	2423	tags=53%, list=21%, signal=67%
GO_REGULATION_OF_PEPTIDYL_SERINE_PHOSPHORYLATION	GO_REGULATION_OF_PEPTIDYL_SERINE_PHOSPHORYLATION		69	-0.510424	-1.90607	0	0.00688929	0.893	1462	tags=28%, list=13%, signal=31%
ZHOU_INFLAMMATORY_RESPONSE_LIVE_UP	ZHOU_INFLAMMATORY_RESPONSE_LIVE_UP		258	-0.427467	-1.90511	0	0.00697071	0.897	2453	tags=38%, list=21%, signal=47%
GNF2_DNM1	GNF2_DNM1		20	-0.676879	-1.90507	0.00613497	0.00695539	0.897	759	tags=35%, list=7%, signal=37%
HALLMARK_APOPTOSIS	HALLMARK_APOPTOSIS		131	-0.462389	-1.90482	0	0.00696429	0.898	2077	tags=38%, list=18%, signal=46%
GSE46606_IRF4MID_VS_WT_CD40L_IL2_IL5_DAY1_STIMULATED_BCELL_DN	GSE46606_IRF4MID_VS_WT_CD40L_IL2_IL5_DAY1_STIMULATED_BCELL_DN		131	-0.463172	-1.90415	0	0.00700632	0.901	1752	tags=28%, list=15%, signal=33%
GNF2_S100A4	GNF2_S100A4		41	-0.572086	-1.90412	0	0.00699102	0.901	1671	tags=37%, list=14%, signal=43%
HALLMARK_INFLAMMATORY_RESPONSE	HALLMARK_INFLAMMATORY_RESPONSE		135	-0.463875	-1.90392	0	0.00698781	0.901	2084	tags=36%, list=18%, signal=44%
GSE29618_BCELL_VS_PDC_UP	GSE29618_BCELL_VS_PDC_UP		165	-0.45439	-1.90376	0	0.00699057	0.901	1463	tags=30%, list=13%, signal=34%
GO_REGULATION_OF_GLIAL_CELL_PROLIFERATION	GO_REGULATION_OF_GLIAL_CELL_PROLIFERATION		16	-0.721421	-1.90371	0	0.0069844	0.901	2079	tags=44%, list=18%, signal=53%
GSE19888_CTRL_VS_TCELL_MEMBRANES_ACT_MAST_CELL_PRETREAT_A3R_INH_DN	GSE19888_CTRL_VS_TCELL_MEMBRANES_ACT_MAST_CELL_PRETREAT_A3R_INH_DN		151	-0.45852	-1.90228	0	0.00710607	0.905	1056	tags=23%, list=9%, signal=25%
MODULE_12	MODULE_12		187	-0.441901	-1.90206	0	0.00711152	0.907	1294	tags=26%, list=11%, signal=28%
KEEN_RESPONSE_TO_ROSIGLITAZONE_DN	KEEN_RESPONSE_TO_ROSIGLITAZONE_DN		69	-0.520371	-1.90107	0	0.00719078	0.912	1511	tags=35%, list=13%, signal=40%
DASU_IL6_SIGNALING_UP	DASU_IL6_SIGNALING_UP		44	-0.555096	-1.89922	0	0.00735827	0.915	1056	tags=30%, list=9%, signal=32%
GO_POSITIVE_REGULATION_OF_DEFENSE_RESPONSE	GO_POSITIVE_REGULATION_OF_DEFENSE_RESPONSE		260	-0.431407	-1.89883	0	0.00738368	0.915	1373	tags=22%, list=12%, signal=25%
GSE11057_NAIVE_CD4_VS_PBMC_CD4_TCELL_DN	GSE11057_NAIVE_CD4_VS_PBMC_CD4_TCELL_DN		163	-0.450101	-1.89829	0	0.00739731	0.918	1541	tags=31%, list=13%, signal=36%
GSE34006_WT_VS_A2AR_KO_TREG_DN	GSE34006_WT_VS_A2AR_KO_TREG_DN		158	-0.460057	-1.89745	0	0.00746364	0.92	1279	tags=30%, list=11%, signal=33%
RODRIGUES_NTN1_AND_DCC_TARGETS	RODRIGUES_NTN1_AND_DCC_TARGETS		25	-0.631895	-1.89725	0	0.00745947	0.921	1243	tags=32%, list=11%, signal=36%
BIOCARTA_VIP_PATHWAY	BIOCARTA_VIP_PATHWAY		20	-0.67366	-1.89671	0.00212314	0.00747868	0.922	592	tags=25%, list=5%, signal=26%
STEARMAN_LUNG_CANCER_EARLY_VS_LATE_DN	STEARMAN_LUNG_CANCER_EARLY_VS_LATE_DN		45	-0.561811	-1.89671	0	0.0074628	0.922	1645	tags=36%, list=14%, signal=41%
CREBP1_Q2	CREBP1_Q2		174	-0.447388	-1.89633	0	0.00747308	0.923	1701	tags=24%, list=15%, signal=27%
BROWN_MYELOID_CELL_DEVELOPMENT_UP	BROWN_MYELOID_CELL_DEVELOPMENT_UP		109	-0.482917	-1.89547	0	0.00753271	0.925	1686	tags=33%, list=15%, signal=38%
SRF_C	SRF_C		132	-0.461854	-1.89445	0	0.0076095	0.927	898	tags=17%, list=8%, signal=19%
WANG_ESOPHAGUS_CANCER_VS_NORMAL_UP	WANG_ESOPHAGUS_CANCER_VS_NORMAL_UP		75	-0.510331	-1.89444	0	0.00759348	0.927	1391	tags=28%, list=12%, signal=32%
GO_REGULATION_OF_CYTOKINE_PRODUCTION	GO_REGULATION_OF_CYTOKINE_PRODUCTION		381	-0.407667	-1.89427	0	0.00758331	0.927	1384	tags=24%, list=12%, signal=27%
NABA_MATRISOME	NABA_MATRISOME		295	-0.420978	-1.89397	0	0.00758749	0.927	1212	tags=19%, list=10%, signal=21%
GSE17721_LPS_VS_PAM3CSK4_2H_BMDC_UP	GSE17721_LPS_VS_PAM3CSK4_2H_BMDC_UP		139	-0.458143	-1.8937	0	0.0076002	0.928	1899	tags=32%, list=16%, signal=38%
BURTON_ADIPOGENESIS_1	BURTON_ADIPOGENESIS_1		29	-0.613936	-1.89256	0	0.00769594	0.93	2004	tags=55%, list=17%, signal=67%
XU_HGF_TARGETS_INDUCED_BY_AKT1_6HR	XU_HGF_TARGETS_INDUCED_BY_AKT1_6HR		15	-0.727069	-1.89178	0	0.00775697	0.935	1630	tags=60%, list=14%, signal=70%
MODULE_64	MODULE_64		243	-0.429828	-1.89124	0	0.00778374	0.936	1630	tags=27%, list=14%, signal=31%
GO_TRANSCRIPTION_FACTOR_ACTIVITY_RNA_POLYMERASE_II_CORE_PROMOTER_PROXIMAL_REGION_SEQUENCE_SPECIFIC_BINDING	GO_TRANSCRIPTION_FACTOR_ACTIVITY_RNA_POLYMERASE_II_CORE_PROMOTER_PROXIMAL_REGION_SEQUENCE_SPECIFIC_BINDING		169	-0.449725	-1.89119	0	0.0077676	0.936	1413	tags=22%, list=12%, signal=25%
LINDVALL_IMMORTALIZED_BY_TERT_DN	LINDVALL_IMMORTALIZED_BY_TERT_DN		37	-0.579655	-1.89054	0.00426439	0.00779982	0.936	1465	tags=27%, list=13%, signal=31%
GO_NEGATIVE_REGULATION_OF_VIRAL_GENOME_REPLICATION	GO_NEGATIVE_REGULATION_OF_VIRAL_GENOME_REPLICATION		40	-0.570586	-1.88972	0.00224719	0.00786032	0.937	1408	tags=40%, list=12%, signal=45%
GO_REGULATION_OF_INTERFERON_GAMMA_PRODUCTION	GO_REGULATION_OF_INTERFERON_GAMMA_PRODUCTION		66	-0.520551	-1.88924	0	0.00788655	0.94	2163	tags=45%, list=19%, signal=56%
MODULE_171	MODULE_171		94	-0.4838	-1.88882	0	0.00791563	0.94	1437	tags=33%, list=12%, signal=37%
GO_GLYCOPROTEIN_BINDING	GO_GLYCOPROTEIN_BINDING		61	-0.527218	-1.88879	0	0.00790219	0.94	1992	tags=39%, list=17%, signal=47%
GSE9650_EFFECTOR_VS_MEMORY_CD8_TCELL_DN	GSE9650_EFFECTOR_VS_MEMORY_CD8_TCELL_DN		171	-0.445209	-1.88796	0	0.00797589	0.941	1416	tags=25%, list=12%, signal=28%
GO_CALCIUM_ION_TRANSMEMBRANE_TRANSPORT	GO_CALCIUM_ION_TRANSMEMBRANE_TRANSPORT		70	-0.523066	-1.88777	0	0.00797923	0.941	2247	tags=37%, list=19%, signal=46%
GO_RNA_POLYMERASE_II_CORE_PROMOTER_SEQUENCE_SPECIFIC_DNA_BINDING	GO_RNA_POLYMERASE_II_CORE_PROMOTER_SEQUENCE_SPECIFIC_DNA_BINDING		34	-0.586414	-1.88746	0.00210084	0.00797968	0.942	1103	tags=26%, list=10%, signal=29%
KEGG_AUTOIMMUNE_THYROID_DISEASE	KEGG_AUTOIMMUNE_THYROID_DISEASE		27	-0.62383	-1.88717	0.00220264	0.00798579	0.943	585	tags=37%, list=5%, signal=39%
MCDOWELL_ACUTE_LUNG_INJURY_UP	MCDOWELL_ACUTE_LUNG_INJURY_UP		25	-0.632321	-1.88631	0	0.00803948	0.945	884	tags=28%, list=8%, signal=30%
MORI_LARGE_PRE_BII_LYMPHOCYTE_DN	MORI_LARGE_PRE_BII_LYMPHOCYTE_DN		52	-0.538545	-1.88585	0.00226244	0.0080594	0.945	2233	tags=44%, list=19%, signal=55%
ZHOU_INFLAMMATORY_RESPONSE_LPS_UP	ZHOU_INFLAMMATORY_RESPONSE_LPS_UP		200	-0.435201	-1.885	0	0.00811535	0.946	1665	tags=28%, list=14%, signal=32%
KEGG_NATURAL_KILLER_CELL_MEDIATED_CYTOTOXICITY	KEGG_NATURAL_KILLER_CELL_MEDIATED_CYTOTOXICITY		87	-0.493254	-1.8843	0	0.00819615	0.948	1132	tags=26%, list=10%, signal=29%
GSE9006_1MONTH_VS_4MONTH_POST_TYPE_1_DIABETES_DX_PBMC_UP	GSE9006_1MONTH_VS_4MONTH_POST_TYPE_1_DIABETES_DX_PBMC_UP		122	-0.469928	-1.88353	0	0.00826536	0.95	2264	tags=36%, list=20%, signal=44%
GO_INTRINSIC_COMPONENT_OF_ENDOPLASMIC_RETICULUM_MEMBRANE	GO_INTRINSIC_COMPONENT_OF_ENDOPLASMIC_RETICULUM_MEMBRANE		111	-0.480966	-1.88244	0	0.00835641	0.951	1763	tags=35%, list=15%, signal=41%
GSE43863_TFH_VS_LY6C_INT_CXCR5POS_EFFECTOR_CD4_TCELL_DN	GSE43863_TFH_VS_LY6C_INT_CXCR5POS_EFFECTOR_CD4_TCELL_DN		133	-0.45861	-1.88193	0	0.00838391	0.952	2198	tags=36%, list=19%, signal=44%
GO_LEUKOCYTE_DIFFERENTIATION	GO_LEUKOCYTE_DIFFERENTIATION		194	-0.439026	-1.88181	0	0.00836987	0.953	1053	tags=22%, list=9%, signal=24%
BOYLAN_MULTIPLE_MYELOMA_C_DN	BOYLAN_MULTIPLE_MYELOMA_C_DN		37	-0.583222	-1.88143	0.00213675	0.00839984	0.953	2004	tags=43%, list=17%, signal=52%
GO_ACTIN_FILAMENT_BUNDLE_ORGANIZATION	GO_ACTIN_FILAMENT_BUNDLE_ORGANIZATION		33	-0.596295	-1.88104	0.00212766	0.00840237	0.954	2392	tags=55%, list=21%, signal=69%
GO_CALCIUM_ION_TRANSPORT	GO_CALCIUM_ION_TRANSPORT		102	-0.485525	-1.88098	0	0.00839383	0.954	1670	tags=29%, list=14%, signal=34%
GSE24634_IL4_VS_CTRL_TREATED_NAIVE_CD4_TCELL_DAY7_DN	GSE24634_IL4_VS_CTRL_TREATED_NAIVE_CD4_TCELL_DAY7_DN		155	-0.452214	-1.88018	0	0.00846749	0.956	2283	tags=36%, list=20%, signal=44%
HOFFMANN_SMALL_PRE_BII_TO_IMMATURE_B_LYMPHOCYTE_UP	HOFFMANN_SMALL_PRE_BII_TO_IMMATURE_B_LYMPHOCYTE_UP		58	-0.524501	-1.87845	0	0.00862496	0.96	1685	tags=33%, list=15%, signal=38%
GO_NEGATIVE_REGULATION_OF_MULTI_ORGANISM_PROCESS	GO_NEGATIVE_REGULATION_OF_MULTI_ORGANISM_PROCESS		100	-0.478064	-1.87844	0	0.00861061	0.96	1408	tags=28%, list=12%, signal=32%
GO_POSITIVE_REGULATION_OF_TUMOR_NECROSIS_FACTOR_SUPERFAMILY_CYTOKINE_PRODUCTION	GO_POSITIVE_REGULATION_OF_TUMOR_NECROSIS_FACTOR_SUPERFAMILY_CYTOKINE_PRODUCTION		41	-0.557821	-1.87771	0	0.00866949	0.96	928	tags=32%, list=8%, signal=34%
GSE17974_0H_VS_72H_IN_VITRO_ACT_CD4_TCELL_UP	GSE17974_0H_VS_72H_IN_VITRO_ACT_CD4_TCELL_UP		135	-0.46516	-1.87721	0	0.00870921	0.96	2019	tags=31%, list=17%, signal=37%
GO_POSITIVE_REGULATION_OF_LYMPHOCYTE_MEDIATED_IMMUNITY	GO_POSITIVE_REGULATION_OF_LYMPHOCYTE_MEDIATED_IMMUNITY		52	-0.544271	-1.87677	0.00211864	0.00875426	0.961	909	tags=29%, list=8%, signal=31%
GSE2770_TGFB_AND_IL4_VS_IL12_TREATED_ACT_CD4_TCELL_6H_UP	GSE2770_TGFB_AND_IL4_VS_IL12_TREATED_ACT_CD4_TCELL_6H_UP		168	-0.448355	-1.87659	0	0.00875313	0.962	1403	tags=25%, list=12%, signal=28%
REACTOME_ANTIGEN_PRESENTATION_FOLDING_ASSEMBLY_AND_PEPTIDE_LOADING_OF_CLASS_I_MHC	REACTOME_ANTIGEN_PRESENTATION_FOLDING_ASSEMBLY_AND_PEPTIDE_LOADING_OF_CLASS_I_MHC		19	-0.679463	-1.87561	0.00446429	0.00883807	0.962	1132	tags=47%, list=10%, signal=52%
SARRIO_EPITHELIAL_MESENCHYMAL_TRANSITION_DN	SARRIO_EPITHELIAL_MESENCHYMAL_TRANSITION_DN		100	-0.480389	-1.87524	0.00214592	0.00885566	0.962	1465	tags=29%, list=13%, signal=33%
WANG_MLL_TARGETS	WANG_MLL_TARGETS		115	-0.47054	-1.87477	0	0.0088892	0.963	2561	tags=37%, list=22%, signal=48%
GSE35685_CD34POS_CD10NEG_CD62LPOS_VS_CD34POS_CD10POS_BONE_MARROW_DN	GSE35685_CD34POS_CD10NEG_CD62LPOS_VS_CD34POS_CD10POS_BONE_MARROW_DN		164	-0.444208	-1.87449	0	0.00890402	0.964	2319	tags=35%, list=20%, signal=44%
GO_NEGATIVE_REGULATION_OF_SIGNAL_TRANSDUCTION_IN_ABSENCE_OF_LIGAND	GO_NEGATIVE_REGULATION_OF_SIGNAL_TRANSDUCTION_IN_ABSENCE_OF_LIGAND		19	-0.677491	-1.87447	0	0.00889471	0.964	1354	tags=42%, list=12%, signal=48%
FLECHNER_BIOPSY_KIDNEY_TRANSPLANT_REJECTED_VS_OK_UP	FLECHNER_BIOPSY_KIDNEY_TRANSPLANT_REJECTED_VS_OK_UP		69	-0.508041	-1.87396	0	0.00890941	0.966	1961	tags=38%, list=17%, signal=45%
GSE18281_SUBCAPSULAR_VS_PERIMEDULLARY_CORTICAL_REGION_OF_THYMUS_DN	GSE18281_SUBCAPSULAR_VS_PERIMEDULLARY_CORTICAL_REGION_OF_THYMUS_DN		126	-0.467195	-1.87268	0	0.00904957	0.967	1892	tags=33%, list=16%, signal=38%
GSE46606_UNSTIM_VS_CD40L_IL2_IL5_3DAY_STIMULATED_IRF4MID_SORTED_BCELL_DN	GSE46606_UNSTIM_VS_CD40L_IL2_IL5_3DAY_STIMULATED_IRF4MID_SORTED_BCELL_DN		161	-0.441096	-1.87228	0	0.00909057	0.967	2185	tags=33%, list=19%, signal=40%
TSAI_RESPONSE_TO_RADIATION_THERAPY	TSAI_RESPONSE_TO_RADIATION_THERAPY		19	-0.671178	-1.87215	0.00204499	0.00908632	0.967	1279	tags=47%, list=11%, signal=53%
GSE22601_IMMATURE_CD4_SINGLE_POSITIVE_VS_CD8_SINGLE_POSITIVE_THYMOCYTE_DN	GSE22601_IMMATURE_CD4_SINGLE_POSITIVE_VS_CD8_SINGLE_POSITIVE_THYMOCYTE_DN		172	-0.437854	-1.87206	0	0.00907672	0.968	1471	tags=24%, list=13%, signal=27%
MODULE_44	MODULE_44		214	-0.426506	-1.8714	0	0.00914631	0.969	1514	tags=29%, list=13%, signal=33%
KHETCHOUMIAN_TRIM24_TARGETS_UP	KHETCHOUMIAN_TRIM24_TARGETS_UP		34	-0.586045	-1.87137	0.00425532	0.00912875	0.969	635	tags=21%, list=5%, signal=22%
SATO_SILENCED_BY_METHYLATION_IN_PANCREATIC_CANCER_1	SATO_SILENCED_BY_METHYLATION_IN_PANCREATIC_CANCER_1		216	-0.42952	-1.87099	0	0.00915061	0.97	1775	tags=28%, list=15%, signal=33%
GO_REGULATION_OF_NATURAL_KILLER_CELL_MEDIATED_IMMUNITY	GO_REGULATION_OF_NATURAL_KILLER_CELL_MEDIATED_IMMUNITY		25	-0.639417	-1.87099	0.004158	0.00913311	0.97	909	tags=40%, list=8%, signal=43%
GO_ANTIGEN_PROCESSING_AND_PRESENTATION_OF_PEPTIDE_ANTIGEN_VIA_MHC_CLASS_I	GO_ANTIGEN_PROCESSING_AND_PRESENTATION_OF_PEPTIDE_ANTIGEN_VIA_MHC_CLASS_I		81	-0.496312	-1.87087	0	0.00912344	0.97	1842	tags=33%, list=16%, signal=39%
GSE3039_NKT_CELL_VS_ALPHAALPHA_CD8_TCELL_DN	GSE3039_NKT_CELL_VS_ALPHAALPHA_CD8_TCELL_DN		146	-0.449927	-1.86993	0	0.00921326	0.971	2109	tags=36%, list=18%, signal=44%
MIKKELSEN_ES_LCP_WITH_H3K4ME3	MIKKELSEN_ES_LCP_WITH_H3K4ME3		53	-0.541964	-1.86928	0	0.00925575	0.971	2002	tags=34%, list=17%, signal=41%
GERY_CEBP_TARGETS	GERY_CEBP_TARGETS		84	-0.495579	-1.86839	0	0.00933183	0.972	1192	tags=27%, list=10%, signal=30%
HUMMERICH_SKIN_CANCER_PROGRESSION_UP	HUMMERICH_SKIN_CANCER_PROGRESSION_UP		57	-0.527556	-1.86821	0	0.00934021	0.972	2233	tags=39%, list=19%, signal=48%
STAT3_02	STAT3_02		89	-0.479455	-1.86799	0	0.00934052	0.972	657	tags=17%, list=6%, signal=18%
GALINDO_IMMUNE_RESPONSE_TO_ENTEROTOXIN	GALINDO_IMMUNE_RESPONSE_TO_ENTEROTOXIN		69	-0.510602	-1.86771	0	0.00936701	0.974	489	tags=22%, list=4%, signal=23%
RUTELLA_RESPONSE_TO_CSF2RB_AND_IL4_DN	RUTELLA_RESPONSE_TO_CSF2RB_AND_IL4_DN		249	-0.419489	-1.86751	0	0.00935193	0.974	1535	tags=23%, list=13%, signal=26%
GSE10325_LUPUS_CD4_TCELL_VS_LUPUS_BCELL_DN	GSE10325_LUPUS_CD4_TCELL_VS_LUPUS_BCELL_DN		160	-0.447099	-1.86495	0	0.00964879	0.978	2349	tags=39%, list=20%, signal=48%
GO_CENTRAL_NERVOUS_SYSTEM_NEURON_DEVELOPMENT	GO_CENTRAL_NERVOUS_SYSTEM_NEURON_DEVELOPMENT		30	-0.610189	-1.86466	0.00409836	0.00965911	0.978	1209	tags=30%, list=10%, signal=33%
GSE19923_HEB_KO_VS_HEB_AND_E2A_KO_DP_THYMOCYTE_DN	GSE19923_HEB_KO_VS_HEB_AND_E2A_KO_DP_THYMOCYTE_DN		161	-0.44413	-1.86461	0	0.00965394	0.978	2259	tags=34%, list=20%, signal=42%
GSE23568_ID3_KO_VS_WT_CD8_TCELL_DN	GSE23568_ID3_KO_VS_WT_CD8_TCELL_DN		171	-0.440422	-1.86457	0	0.00963845	0.978	2254	tags=36%, list=19%, signal=44%
GSE43955_TGFB_IL6_VS_TGFB_IL6_IL23_TH17_ACT_CD4_TCELL_52H_DN	GSE43955_TGFB_IL6_VS_TGFB_IL6_IL23_TH17_ACT_CD4_TCELL_52H_DN		152	-0.446325	-1.86448	0	0.00962563	0.978	2004	tags=31%, list=17%, signal=37%
GO_THYMUS_DEVELOPMENT	GO_THYMUS_DEVELOPMENT		27	-0.60925	-1.86382	0.00439561	0.0096819	0.978	2027	tags=44%, list=18%, signal=54%
PID_TCR_CALCIUM_PATHWAY	PID_TCR_CALCIUM_PATHWAY		18	-0.680711	-1.86368	0	0.00967406	0.978	489	tags=28%, list=4%, signal=29%
MODULE_76	MODULE_76		38	-0.564748	-1.86311	0	0.00972983	0.979	1167	tags=26%, list=10%, signal=29%
GSE33424_CD161_HIGH_VS_NEG_CD8_TCELL_UP	GSE33424_CD161_HIGH_VS_NEG_CD8_TCELL_UP		168	-0.449435	-1.86283	0	0.00975259	0.98	2204	tags=39%, list=19%, signal=47%
GSE10325_BCELL_VS_MYELOID_DN	GSE10325_BCELL_VS_MYELOID_DN		143	-0.448809	-1.86272	0	0.00974991	0.98	1678	tags=30%, list=14%, signal=35%
GO_REGULATION_OF_T_CELL_PROLIFERATION	GO_REGULATION_OF_T_CELL_PROLIFERATION		108	-0.472456	-1.86229	0	0.00979505	0.98	1271	tags=25%, list=11%, signal=28%
GSE43863_TFH_VS_LY6C_INT_CXCR5POS_MEMORY_CD4_TCELL_UP	GSE43863_TFH_VS_LY6C_INT_CXCR5POS_MEMORY_CD4_TCELL_UP		147	-0.449925	-1.86227	0.00224215	0.00977953	0.98	1419	tags=26%, list=12%, signal=29%
GSE6269_FLU_VS_STREP_PNEUMO_INF_PBMC_UP	GSE6269_FLU_VS_STREP_PNEUMO_INF_PBMC_UP		153	-0.446139	-1.86208	0	0.00978682	0.98	1132	tags=29%, list=10%, signal=31%
GSE39382_IL3_VS_IL3_IL33_TREATED_MAST_CELL_DN	GSE39382_IL3_VS_IL3_IL33_TREATED_MAST_CELL_DN		165	-0.439708	-1.8614	0	0.00986205	0.98	2270	tags=38%, list=20%, signal=46%
XU_AKT1_TARGETS_6HR	XU_AKT1_TARGETS_6HR		23	-0.648774	-1.86118	0	0.0098792	0.98	1365	tags=48%, list=12%, signal=54%
GO_POSITIVE_REGULATION_OF_LYMPHOCYTE_DIFFERENTIATION	GO_POSITIVE_REGULATION_OF_LYMPHOCYTE_DIFFERENTIATION		55	-0.528507	-1.86109	0	0.00987117	0.98	909	tags=29%, list=8%, signal=31%
MODULE_170	MODULE_170		64	-0.516136	-1.86087	0	0.00988572	0.981	1596	tags=34%, list=14%, signal=40%
GSE23502_BM_VS_COLON_TUMOR_MYELOID_DERIVED_SUPPRESSOR_CELL_UP	GSE23502_BM_VS_COLON_TUMOR_MYELOID_DERIVED_SUPPRESSOR_CELL_UP		147	-0.450401	-1.85973	0	0.0100352	0.985	2615	tags=44%, list=23%, signal=56%
GSE17974_CTRL_VS_ACT_IL4_AND_ANTI_IL12_72H_CD4_TCELL_UP	GSE17974_CTRL_VS_ACT_IL4_AND_ANTI_IL12_72H_CD4_TCELL_UP		145	-0.450883	-1.85942	0	0.0100593	0.985	2314	tags=37%, list=20%, signal=45%
PELLICCIOTTA_HDAC_IN_ANTIGEN_PRESENTATION_DN	PELLICCIOTTA_HDAC_IN_ANTIGEN_PRESENTATION_DN		48	-0.545986	-1.85915	0	0.010066	0.986	2068	tags=48%, list=18%, signal=58%
GSE360_T_GONDII_VS_B_MALAYI_HIGH_DOSE_DC_UP	GSE360_T_GONDII_VS_B_MALAYI_HIGH_DOSE_DC_UP		126	-0.461159	-1.85914	0.00221239	0.0100477	0.986	1498	tags=29%, list=13%, signal=33%
GSE24726_WT_VS_E2_2_KO_PDC_DN	GSE24726_WT_VS_E2_2_KO_PDC_DN		166	-0.437116	-1.85866	0	0.0100716	0.986	1917	tags=30%, list=17%, signal=36%
CHR5Q23	CHR5Q23		30	-0.603294	-1.85825	0.00218818	0.0101055	0.987	554	tags=20%, list=5%, signal=21%
GO_POSITIVE_REGULATION_OF_CELL_CELL_ADHESION	GO_POSITIVE_REGULATION_OF_CELL_CELL_ADHESION		163	-0.443415	-1.85808	0	0.0101095	0.987	2453	tags=38%, list=21%, signal=48%
LIU_SMARCA4_TARGETS	LIU_SMARCA4_TARGETS		29	-0.611271	-1.85765	0.00466201	0.0101753	0.988	1881	tags=41%, list=16%, signal=49%
WONG_ADULT_TISSUE_STEM_MODULE	WONG_ADULT_TISSUE_STEM_MODULE		439	-0.396159	-1.85742	0	0.0101791	0.988	2077	tags=30%, list=18%, signal=36%
GSE27241_CTRL_VS_DIGOXIN_TREATED_CD4_TCELL_IN_TH17_POLARIZING_CONDITIONS_UP	GSE27241_CTRL_VS_DIGOXIN_TREATED_CD4_TCELL_IN_TH17_POLARIZING_CONDITIONS_UP		117	-0.462129	-1.85673	0	0.0102448	0.988	1327	tags=26%, list=11%, signal=30%
GNF2_MCL1	GNF2_MCL1		48	-0.545702	-1.85632	0	0.0102634	0.989	2107	tags=44%, list=18%, signal=53%
LU_TUMOR_VASCULATURE_UP	LU_TUMOR_VASCULATURE_UP		15	-0.69779	-1.8555	0.00431035	0.0103675	0.989	1279	tags=40%, list=11%, signal=45%
LEE_NEURAL_CREST_STEM_CELL_UP	LEE_NEURAL_CREST_STEM_CELL_UP		60	-0.518346	-1.85533	0	0.0103613	0.989	750	tags=22%, list=6%, signal=23%
GSE40685_TREG_VS_FOXP3_KO_TREG_PRECURSOR_DN	GSE40685_TREG_VS_FOXP3_KO_TREG_PRECURSOR_DN		157	-0.446	-1.85518	0	0.01036	0.99	1962	tags=36%, list=17%, signal=42%
GSE44649_WT_VS_MIR155_KO_NAIVE_CD8_TCELL_DN	GSE44649_WT_VS_MIR155_KO_NAIVE_CD8_TCELL_DN		150	-0.439158	-1.85506	0	0.0103515	0.99	1686	tags=29%, list=15%, signal=34%
GO_REGULATION_OF_CYTOKINE_SECRETION	GO_REGULATION_OF_CYTOKINE_SECRETION		94	-0.4808	-1.85392	0.00218341	0.0104596	0.991	2529	tags=50%, list=22%, signal=63%
BILD_HRAS_ONCOGENIC_SIGNATURE	BILD_HRAS_ONCOGENIC_SIGNATURE		170	-0.436242	-1.85382	0	0.0104508	0.991	1935	tags=28%, list=17%, signal=33%
CHR10P11	CHR10P11		20	-0.652326	-1.85232	0.00420168	0.0106431	0.991	1002	tags=25%, list=9%, signal=27%
GO_ER_TO_GOLGI_TRANSPORT_VESICLE	GO_ER_TO_GOLGI_TRANSPORT_VESICLE		61	-0.518305	-1.85124	0.00235849	0.0107743	0.993	789	tags=25%, list=7%, signal=26%
GO_POSITIVE_REGULATION_OF_CYTOKINE_PRODUCTION	GO_POSITIVE_REGULATION_OF_CYTOKINE_PRODUCTION		255	-0.416576	-1.8511	0	0.010782	0.993	1792	tags=31%, list=15%, signal=35%
GO_POSITIVE_REGULATION_OF_ADAPTIVE_IMMUNE_RESPONSE	GO_POSITIVE_REGULATION_OF_ADAPTIVE_IMMUNE_RESPONSE		54	-0.525442	-1.85096	0	0.0107775	0.993	889	tags=28%, list=8%, signal=30%
GO_REGULATION_OF_HORMONE_SECRETION	GO_REGULATION_OF_HORMONE_SECRETION		129	-0.453799	-1.85045	0	0.0108308	0.993	2509	tags=33%, list=22%, signal=41%
GSE7831_UNSTIM_VS_INFLUENZA_STIM_PDC_4H_UP	GSE7831_UNSTIM_VS_INFLUENZA_STIM_PDC_4H_UP		146	-0.45209	-1.85033	0	0.0108264	0.993	1950	tags=34%, list=17%, signal=40%
GSE30083_SP2_VS_SP4_THYMOCYTE_DN	GSE30083_SP2_VS_SP4_THYMOCYTE_DN		143	-0.451664	-1.85028	0	0.0108315	0.993	1412	tags=24%, list=12%, signal=28%
VALK_AML_CLUSTER_1	VALK_AML_CLUSTER_1		19	-0.653241	-1.85018	0.00655022	0.0108246	0.993	1192	tags=32%, list=10%, signal=35%
REACTOME_ANTIGEN_PROCESSING_CROSS_PRESENTATION	REACTOME_ANTIGEN_PROCESSING_CROSS_PRESENTATION		65	-0.511953	-1.84992	0	0.0108586	0.993	1132	tags=26%, list=10%, signal=29%
GO_14_3_3_PROTEIN_BINDING	GO_14_3_3_PROTEIN_BINDING		15	-0.707731	-1.84898	0.00440529	0.010928	0.994	33	tags=13%, list=0%, signal=13%
GO_POSITIVE_REGULATION_OF_PEPTIDYL_TYROSINE_PHOSPHORYLATION	GO_POSITIVE_REGULATION_OF_PEPTIDYL_TYROSINE_PHOSPHORYLATION		86	-0.484937	-1.84885	0	0.0109232	0.994	2453	tags=41%, list=21%, signal=51%
GSE2706_LPS_VS_R848_AND_LPS_8H_STIM_DC_DN	GSE2706_LPS_VS_R848_AND_LPS_8H_STIM_DC_DN		111	-0.46538	-1.84818	0	0.0109734	0.994	1264	tags=24%, list=11%, signal=27%
GSE27859_MACROPHAGE_VS_DC_UP	GSE27859_MACROPHAGE_VS_DC_UP		136	-0.454045	-1.84796	0	0.0109925	0.995	1637	tags=27%, list=14%, signal=31%
GSE35825_IFNA_VS_IFNG_STIM_MACROPHAGE_UP	GSE35825_IFNA_VS_IFNG_STIM_MACROPHAGE_UP		130	-0.455901	-1.84746	0	0.0110279	0.996	1723	tags=29%, list=15%, signal=34%
GSE43955_TH0_VS_TGFB_IL6_IL23_TH17_ACT_CD4_TCELL_52H_DN	GSE43955_TH0_VS_TGFB_IL6_IL23_TH17_ACT_CD4_TCELL_52H_DN		146	-0.448597	-1.84616	0	0.0111582	0.996	1797	tags=31%, list=16%, signal=36%
GSE21670_STAT3_KO_VS_WT_CD4_TCELL_UP	GSE21670_STAT3_KO_VS_WT_CD4_TCELL_UP		158	-0.446064	-1.84578	0	0.0112028	0.996	1413	tags=27%, list=12%, signal=31%
VERHAAK_GLIOBLASTOMA_MESENCHYMAL	VERHAAK_GLIOBLASTOMA_MESENCHYMAL		165	-0.438539	-1.84461	0	0.011339	0.996	2002	tags=33%, list=17%, signal=39%
GSE41867_NAIVE_VS_DAY30_LCMV_CLONE13_EXHAUSTED_CD8_TCELL_UP	GSE41867_NAIVE_VS_DAY30_LCMV_CLONE13_EXHAUSTED_CD8_TCELL_UP		129	-0.453478	-1.84447	0	0.0113432	0.996	1714	tags=32%, list=15%, signal=37%
GO_RESPONSE_TO_CORTICOSTEROID	GO_RESPONSE_TO_CORTICOSTEROID		104	-0.4681	-1.84417	0	0.0113424	0.996	1181	tags=22%, list=10%, signal=24%
MODY_HIPPOCAMPUS_POSTNATAL	MODY_HIPPOCAMPUS_POSTNATAL		40	-0.57096	-1.84414	0.00653595	0.0113277	0.996	1478	tags=28%, list=13%, signal=31%
GSE1740_UNSTIM_VS_IFNA_STIMULATED_MCSF_DERIVED_MACROPHAGE_DN	GSE1740_UNSTIM_VS_IFNA_STIMULATED_MCSF_DERIVED_MACROPHAGE_DN		133	-0.4498	-1.84324	0	0.0114463	0.997	2373	tags=37%, list=20%, signal=46%
GSE8384_CTRL_VS_B_ABORTUS_4H_MAC_CELL_LINE_DN	GSE8384_CTRL_VS_B_ABORTUS_4H_MAC_CELL_LINE_DN		164	-0.443358	-1.84322	0	0.0114292	0.997	1350	tags=19%, list=12%, signal=21%
CROONQUIST_NRAS_SIGNALING_UP	CROONQUIST_NRAS_SIGNALING_UP		29	-0.601703	-1.8432	0.00426439	0.0114191	0.997	1332	tags=34%, list=12%, signal=39%
BIOCARTA_FCER1_PATHWAY	BIOCARTA_FCER1_PATHWAY		35	-0.581266	-1.84275	0	0.0114626	0.997	611	tags=20%, list=5%, signal=21%
GO_NEGATIVE_REGULATION_OF_SECRETION	GO_NEGATIVE_REGULATION_OF_SECRETION		104	-0.470492	-1.84267	0	0.0114595	0.997	1739	tags=31%, list=15%, signal=36%
GSE17721_LPS_VS_POLYIC_1H_BMDC_UP	GSE17721_LPS_VS_POLYIC_1H_BMDC_UP		133	-0.451055	-1.84257	0	0.0114541	0.997	526	tags=15%, list=5%, signal=16%
KRIGE_AMINO_ACID_DEPRIVATION	KRIGE_AMINO_ACID_DEPRIVATION		26	-0.619826	-1.84185	0.00207039	0.0115181	0.997	1917	tags=38%, list=17%, signal=46%
GO_REGULATION_OF_CARDIAC_CONDUCTION	GO_REGULATION_OF_CARDIAC_CONDUCTION		27	-0.593044	-1.84169	0.00222222	0.0115195	0.997	1670	tags=41%, list=14%, signal=47%
GSE17974_IL4_AND_ANTI_IL12_VS_UNTREATED_48H_ACT_CD4_TCELL_DN	GSE17974_IL4_AND_ANTI_IL12_VS_UNTREATED_48H_ACT_CD4_TCELL_DN		122	-0.450193	-1.84158	0	0.0115232	0.997	2226	tags=38%, list=19%, signal=46%
GO_REGULATION_OF_SENSORY_PERCEPTION	GO_REGULATION_OF_SENSORY_PERCEPTION		15	-0.701071	-1.84099	0.00434783	0.0115799	0.997	929	tags=33%, list=8%, signal=36%
GO_LYMPHOCYTE_DIFFERENTIATION	GO_LYMPHOCYTE_DIFFERENTIATION		138	-0.451698	-1.84036	0	0.0116503	0.997	1035	tags=24%, list=9%, signal=26%
GSE9878_CTRL_VS_EBF_TRANSDUCED_PAX5_KO_PRO_BCELL_UP	GSE9878_CTRL_VS_EBF_TRANSDUCED_PAX5_KO_PRO_BCELL_UP		125	-0.455914	-1.83989	0	0.0117066	0.997	2002	tags=29%, list=17%, signal=34%
GSE15930_STIM_VS_STIM_AND_IFNAB_48H_CD8_T_CELL_DN	GSE15930_STIM_VS_STIM_AND_IFNAB_48H_CD8_T_CELL_DN		159	-0.440457	-1.83964	0	0.0117168	0.997	1923	tags=32%, list=17%, signal=38%
REACTOME_CYTOKINE_SIGNALING_IN_IMMUNE_SYSTEM	REACTOME_CYTOKINE_SIGNALING_IN_IMMUNE_SYSTEM		221	-0.422814	-1.83925	0	0.0117844	0.997	1288	tags=23%, list=11%, signal=25%
GSE17721_POLYIC_VS_PAM3CSK4_1H_BMDC_DN	GSE17721_POLYIC_VS_PAM3CSK4_1H_BMDC_DN		140	-0.450391	-1.83914	0	0.0117807	0.997	1294	tags=22%, list=11%, signal=25%
DAVICIONI_PAX_FOXO1_SIGNATURE_IN_ARMS_UP	DAVICIONI_PAX_FOXO1_SIGNATURE_IN_ARMS_UP		32	-0.583598	-1.83767	0.00430107	0.0119844	0.997	778	tags=28%, list=7%, signal=30%
BOHN_PRIMARY_IMMUNODEFICIENCY_SYNDROM_DN	BOHN_PRIMARY_IMMUNODEFICIENCY_SYNDROM_DN		38	-0.578093	-1.83753	0.00427351	0.0119942	0.997	2107	tags=42%, list=18%, signal=51%
PID_MAPK_TRK_PATHWAY	PID_MAPK_TRK_PATHWAY		31	-0.579877	-1.8373	0.00217865	0.0120017	0.997	2371	tags=39%, list=20%, signal=49%
GO_REGULATION_OF_BLOOD_CIRCULATION	GO_REGULATION_OF_BLOOD_CIRCULATION		122	-0.457379	-1.83639	0	0.0121339	0.998	1995	tags=33%, list=17%, signal=39%
PID_INTEGRIN_A9B1_PATHWAY	PID_INTEGRIN_A9B1_PATHWAY		16	-0.679047	-1.83621	0.00427351	0.0121501	0.998	1917	tags=50%, list=17%, signal=60%
GSE19401_UNSTIM_VS_RETINOIC_ACID_STIM_FOLLICULAR_DC_UP	GSE19401_UNSTIM_VS_RETINOIC_ACID_STIM_FOLLICULAR_DC_UP		160	-0.440378	-1.83564	0	0.0122094	0.998	2120	tags=32%, list=18%, signal=38%
DAZARD_UV_RESPONSE_CLUSTER_G4	DAZARD_UV_RESPONSE_CLUSTER_G4		15	-0.70683	-1.83554	0.00431035	0.0122164	0.998	161	tags=20%, list=1%, signal=20%
GO_CELLULAR_EXTRAVASATION	GO_CELLULAR_EXTRAVASATION		16	-0.719607	-1.83465	0	0.0123319	0.998	1782	tags=63%, list=15%, signal=74%
MARKEY_RB1_CHRONIC_LOF_DN	MARKEY_RB1_CHRONIC_LOF_DN		67	-0.503213	-1.83426	0	0.0123682	0.998	881	tags=25%, list=8%, signal=27%
GSE33425_CD161_HIGH_VS_INT_CD8_TCELL_UP	GSE33425_CD161_HIGH_VS_INT_CD8_TCELL_UP		168	-0.434899	-1.8342	0	0.0123524	0.998	1940	tags=33%, list=17%, signal=39%
GSE1112_HY_CD8AB_VS_HY_CD8AA_THYMOCYTE_RTOC_CULTURE_UP	GSE1112_HY_CD8AB_VS_HY_CD8AA_THYMOCYTE_RTOC_CULTURE_UP		121	-0.460081	-1.83377	0	0.0124041	0.998	1627	tags=29%, list=14%, signal=33%
GSE17974_IL4_AND_ANTI_IL12_VS_UNTREATED_72H_ACT_CD4_TCELL_DN	GSE17974_IL4_AND_ANTI_IL12_VS_UNTREATED_72H_ACT_CD4_TCELL_DN		149	-0.444166	-1.83338	0	0.0124265	0.998	2303	tags=40%, list=20%, signal=49%
GO_GROWTH_FACTOR_ACTIVITY	GO_GROWTH_FACTOR_ACTIVITY		52	-0.528537	-1.83337	0.00424628	0.0124106	0.998	1195	tags=27%, list=10%, signal=30%
SESTO_RESPONSE_TO_UV_C3	SESTO_RESPONSE_TO_UV_C3		18	-0.687684	-1.83313	0	0.0124483	0.998	385	tags=28%, list=3%, signal=29%
GO_INFLAMMATORY_RESPONSE	GO_INFLAMMATORY_RESPONSE		244	-0.414833	-1.83191	0	0.0126246	0.998	1212	tags=21%, list=10%, signal=23%
GSE360_T_GONDII_VS_B_MALAYI_LOW_DOSE_DC_UP	GSE360_T_GONDII_VS_B_MALAYI_LOW_DOSE_DC_UP		137	-0.446982	-1.83179	0	0.0126174	0.998	1493	tags=30%, list=13%, signal=34%
GO_REGULATION_OF_LEUKOCYTE_PROLIFERATION	GO_REGULATION_OF_LEUKOCYTE_PROLIFERATION		147	-0.443085	-1.83161	0	0.0126347	0.998	2163	tags=34%, list=19%, signal=41%
GO_COLLAGEN_BINDING	GO_COLLAGEN_BINDING		29	-0.600071	-1.83141	0.00639659	0.0126454	0.998	1592	tags=38%, list=14%, signal=44%
CHIARADONNA_NEOPLASTIC_TRANSFORMATION_KRAS_DN	CHIARADONNA_NEOPLASTIC_TRANSFORMATION_KRAS_DN		91	-0.473809	-1.83125	0	0.012645	0.998	2329	tags=35%, list=20%, signal=44%
GSE360_L_DONOVANI_VS_L_MAJOR_DC_DN	GSE360_L_DONOVANI_VS_L_MAJOR_DC_DN		129	-0.450848	-1.83099	0	0.0126578	0.998	1563	tags=25%, list=13%, signal=28%
GSE17974_CTRL_VS_ACT_IL4_AND_ANTI_IL12_48H_CD4_TCELL_UP	GSE17974_CTRL_VS_ACT_IL4_AND_ANTI_IL12_48H_CD4_TCELL_UP		134	-0.444473	-1.83083	0	0.0126617	0.998	2349	tags=37%, list=20%, signal=46%
GSE15930_STIM_VS_STIM_AND_TRICHOSTATINA_48H_CD8_T_CELL_DN	GSE15930_STIM_VS_STIM_AND_TRICHOSTATINA_48H_CD8_T_CELL_DN		164	-0.433388	-1.83073	0	0.0126545	0.998	1573	tags=30%, list=14%, signal=34%
GSE7509_UNSTIM_VS_FCGRIIB_STIM_DC_DN	GSE7509_UNSTIM_VS_FCGRIIB_STIM_DC_DN		142	-0.443457	-1.83011	0	0.0127045	0.998	1962	tags=32%, list=17%, signal=39%
GO_CALCIUM_ION_TRANSMEMBRANE_TRANSPORTER_ACTIVITY	GO_CALCIUM_ION_TRANSMEMBRANE_TRANSPORTER_ACTIVITY		51	-0.530334	-1.82902	0.00220264	0.0128317	0.998	2860	tags=49%, list=25%, signal=65%
ATF_01	ATF_01		174	-0.428555	-1.82895	0	0.0128222	0.998	1355	tags=25%, list=12%, signal=28%
GO_POSITIVE_REGULATION_OF_INTERLEUKIN_8_PRODUCTION	GO_POSITIVE_REGULATION_OF_INTERLEUKIN_8_PRODUCTION		29	-0.593481	-1.82893	0	0.0128017	0.998	1309	tags=31%, list=11%, signal=35%
GO_REGULATION_OF_RENAL_SYSTEM_PROCESS	GO_REGULATION_OF_RENAL_SYSTEM_PROCESS		15	-0.694218	-1.82878	0.00420168	0.0127988	0.998	929	tags=27%, list=8%, signal=29%
GO_POSITIVE_REGULATION_OF_INSULIN_SECRETION	GO_POSITIVE_REGULATION_OF_INSULIN_SECRETION		37	-0.571173	-1.82846	0.0021692	0.0128198	0.998	2368	tags=46%, list=20%, signal=58%
GSE1432_1H_VS_24H_IFNG_MICROGLIA_DN	GSE1432_1H_VS_24H_IFNG_MICROGLIA_DN		164	-0.433952	-1.82819	0	0.0128365	0.998	2412	tags=38%, list=21%, signal=47%
GO_REGULATION_OF_LYMPHOCYTE_MEDIATED_IMMUNITY	GO_REGULATION_OF_LYMPHOCYTE_MEDIATED_IMMUNITY		85	-0.484885	-1.82795	0.0021692	0.0128445	0.998	1025	tags=26%, list=9%, signal=28%
GO_ATPASE_ACTIVITY_COUPLED_TO_TRANSMEMBRANE_MOVEMENT_OF_IONS_PHOSPHORYLATIVE_MECHANISM	GO_ATPASE_ACTIVITY_COUPLED_TO_TRANSMEMBRANE_MOVEMENT_OF_IONS_PHOSPHORYLATIVE_MECHANISM		21	-0.630343	-1.8274	0.00212766	0.012885	0.998	1554	tags=43%, list=13%, signal=49%
GSE43863_DAY6_EFF_VS_DAY150_MEM_TFH_CD4_TCELL_DN	GSE43863_DAY6_EFF_VS_DAY150_MEM_TFH_CD4_TCELL_DN		106	-0.470738	-1.82739	0	0.0128668	0.998	2453	tags=39%, list=21%, signal=49%
MODULE_174	MODULE_174		59	-0.511208	-1.82734	0	0.0128486	0.998	1546	tags=29%, list=13%, signal=33%
GO_IRE1_MEDIATED_UNFOLDED_PROTEIN_RESPONSE	GO_IRE1_MEDIATED_UNFOLDED_PROTEIN_RESPONSE		52	-0.523595	-1.82677	0.00220751	0.0129084	0.998	1997	tags=38%, list=17%, signal=46%
GSE2770_TGFB_AND_IL4_VS_IL12_TREATED_ACT_CD4_TCELL_2H_DN	GSE2770_TGFB_AND_IL4_VS_IL12_TREATED_ACT_CD4_TCELL_2H_DN		150	-0.445249	-1.82628	0	0.0129656	0.998	1950	tags=34%, list=17%, signal=40%
SHAFFER_IRF4_TARGETS_IN_MYELOMA_VS_MATURE_B_LYMPHOCYTE	SHAFFER_IRF4_TARGETS_IN_MYELOMA_VS_MATURE_B_LYMPHOCYTE		95	-0.474102	-1.82526	0	0.0130812	0.998	1493	tags=24%, list=13%, signal=28%
GO_POSITIVE_T_CELL_SELECTION	GO_POSITIVE_T_CELL_SELECTION		15	-0.682187	-1.82447	0.0155902	0.0131748	0.998	445	tags=33%, list=4%, signal=35%
GO_POSITIVE_REGULATION_OF_LEUKOCYTE_DIFFERENTIATION	GO_POSITIVE_REGULATION_OF_LEUKOCYTE_DIFFERENTIATION		93	-0.466292	-1.82357	0	0.0132727	0.998	2265	tags=40%, list=20%, signal=49%
GSE3982_NEUTROPHIL_VS_NKCELL_UP	GSE3982_NEUTROPHIL_VS_NKCELL_UP		158	-0.431436	-1.82337	0	0.0132713	0.999	2413	tags=35%, list=21%, signal=44%
GSE14000_UNSTIM_VS_16H_LPS_DC_TRANSLATED_RNA_DN	GSE14000_UNSTIM_VS_16H_LPS_DC_TRANSLATED_RNA_DN		157	-0.437146	-1.82295	0	0.0133278	0.999	1518	tags=31%, list=13%, signal=35%
GSE1460_DP_VS_CD4_THYMOCYTE_DN	GSE1460_DP_VS_CD4_THYMOCYTE_DN		147	-0.446598	-1.82243	0	0.0133989	0.999	2274	tags=39%, list=20%, signal=48%
GSE7768_OVA_WITH_LPS_VS_OVA_WITH_MPL_IMMUNIZED_MOUSE_WHOLE_SPLEEN_6H_DN	GSE7768_OVA_WITH_LPS_VS_OVA_WITH_MPL_IMMUNIZED_MOUSE_WHOLE_SPLEEN_6H_DN		132	-0.444186	-1.82234	0	0.0133972	0.999	1642	tags=29%, list=14%, signal=33%
CASTELLANO_NRAS_TARGETS_UP	CASTELLANO_NRAS_TARGETS_UP		41	-0.541956	-1.82201	0.00215983	0.0134255	0.999	1505	tags=37%, list=13%, signal=42%
RIZ_ERYTHROID_DIFFERENTIATION_12HR	RIZ_ERYTHROID_DIFFERENTIATION_12HR		22	-0.615533	-1.82177	0.00434783	0.0134389	0.999	370	tags=18%, list=3%, signal=19%
MODULE_128	MODULE_128		61	-0.509653	-1.82173	0	0.0134288	0.999	1596	tags=34%, list=14%, signal=40%
HOSHIDA_LIVER_CANCER_SUBCLASS_S1	HOSHIDA_LIVER_CANCER_SUBCLASS_S1		194	-0.427808	-1.82123	0	0.0134929	0.999	1695	tags=25%, list=15%, signal=28%
GSE1448_CTRL_VS_ANTI_VBETA5_DP_THYMOCYTE_DN	GSE1448_CTRL_VS_ANTI_VBETA5_DP_THYMOCYTE_DN		158	-0.434597	-1.82116	0	0.0134869	0.999	1367	tags=22%, list=12%, signal=25%
GSE43863_DAY6_EFF_VS_DAY150_MEM_LY6C_INT_CXCR5POS_CD4_TCELL_UP	GSE43863_DAY6_EFF_VS_DAY150_MEM_LY6C_INT_CXCR5POS_CD4_TCELL_UP		140	-0.446104	-1.8211	0	0.0134725	0.999	675	tags=17%, list=6%, signal=18%
GO_RESPONSE_TO_MINERALOCORTICOID	GO_RESPONSE_TO_MINERALOCORTICOID		21	-0.638253	-1.82107	0.00869565	0.0134559	0.999	1181	tags=33%, list=10%, signal=37%
GAJATE_RESPONSE_TO_TRABECTEDIN_UP	GAJATE_RESPONSE_TO_TRABECTEDIN_UP		50	-0.534429	-1.8204	0	0.013524	0.999	1280	tags=42%, list=11%, signal=47%
GSE29618_BCELL_VS_MONOCYTE_DAY7_FLU_VACCINE_DN	GSE29618_BCELL_VS_MONOCYTE_DAY7_FLU_VACCINE_DN		157	-0.432413	-1.81983	0	0.0135834	1	1680	tags=29%, list=15%, signal=34%
GSE29949_MICROGLIA_BRAIN_VS_CD8_NEG_DC_SPLEEN_UP	GSE29949_MICROGLIA_BRAIN_VS_CD8_NEG_DC_SPLEEN_UP		121	-0.45355	-1.81898	0.00223714	0.0136888	1	1399	tags=27%, list=12%, signal=31%
GSE7509_DC_VS_MONOCYTE_WITH_FCGRIIB_STIM_DN	GSE7509_DC_VS_MONOCYTE_WITH_FCGRIIB_STIM_DN		161	-0.4304	-1.81892	0	0.0136784	1	1279	tags=24%, list=11%, signal=27%
GO_POSITIVE_REGULATION_OF_SMOOTH_MUSCLE_CELL_PROLIFERATION	GO_POSITIVE_REGULATION_OF_SMOOTH_MUSCLE_CELL_PROLIFERATION		44	-0.535846	-1.8185	0.00416667	0.013714	1	1178	tags=27%, list=10%, signal=30%
GSE10325_LUPUS_BCELL_VS_LUPUS_MYELOID_DN	GSE10325_LUPUS_BCELL_VS_LUPUS_MYELOID_DN		155	-0.440207	-1.81824	0	0.0137475	1	1693	tags=30%, list=15%, signal=34%
PID_IL2_1PATHWAY	PID_IL2_1PATHWAY		51	-0.524424	-1.8181	0	0.0137496	1	712	tags=18%, list=6%, signal=19%
GSE360_DC_VS_MAC_T_GONDII_DN	GSE360_DC_VS_MAC_T_GONDII_DN		128	-0.450212	-1.81796	0	0.0137476	1	2236	tags=38%, list=19%, signal=47%
KEGG_HEMATOPOIETIC_CELL_LINEAGE	KEGG_HEMATOPOIETIC_CELL_LINEAGE		47	-0.533658	-1.81779	0.00643777	0.0137538	1	3406	tags=57%, list=29%, signal=81%
MODULE_291	MODULE_291		45	-0.538855	-1.81771	0	0.0137578	1	1460	tags=29%, list=13%, signal=33%
ACEVEDO_LIVER_TUMOR_VS_NORMAL_ADJACENT_TISSUE_DN	ACEVEDO_LIVER_TUMOR_VS_NORMAL_ADJACENT_TISSUE_DN		174	-0.429865	-1.8157	0	0.0140843	1	1528	tags=18%, list=13%, signal=21%
GSE1460_INTRATHYMIC_T_PROGENITOR_VS_CD4_THYMOCYTE_DN	GSE1460_INTRATHYMIC_T_PROGENITOR_VS_CD4_THYMOCYTE_DN		156	-0.432277	-1.81523	0	0.0141252	1	1954	tags=33%, list=17%, signal=40%
ZHOU_TNF_SIGNALING_30MIN	ZHOU_TNF_SIGNALING_30MIN		44	-0.529509	-1.8151	0	0.0141245	1	928	tags=18%, list=8%, signal=20%
PID_IFNG_PATHWAY	PID_IFNG_PATHWAY		38	-0.558349	-1.81507	0.00203252	0.0141074	1	1739	tags=32%, list=15%, signal=37%
GO_REGULATION_OF_INSULIN_SECRETION_INVOLVED_IN_CELLULAR_RESPONSE_TO_GLUCOSE_STIMULUS	GO_REGULATION_OF_INSULIN_SECRETION_INVOLVED_IN_CELLULAR_RESPONSE_TO_GLUCOSE_STIMULUS		26	-0.611487	-1.81358	0.00431035	0.0143133	1	1187	tags=35%, list=10%, signal=38%
GO_LEUKOCYTE_CELL_CELL_ADHESION	GO_LEUKOCYTE_CELL_CELL_ADHESION		168	-0.432078	-1.81301	0	0.0143806	1	2255	tags=35%, list=19%, signal=43%
GO_POSITIVE_REGULATION_OF_ENDOCYTOSIS	GO_POSITIVE_REGULATION_OF_ENDOCYTOSIS		65	-0.501203	-1.81285	0	0.01439	1	1150	tags=25%, list=10%, signal=27%
GSE1740_MCSF_VS_MCSF_AND_IFNG_DAY2_DERIVED_MACROPHAGE_UP	GSE1740_MCSF_VS_MCSF_AND_IFNG_DAY2_DERIVED_MACROPHAGE_UP		104	-0.461536	-1.81229	0.00240964	0.0144507	1	2561	tags=43%, list=22%, signal=55%
GO_CERAMIDE_BIOSYNTHETIC_PROCESS	GO_CERAMIDE_BIOSYNTHETIC_PROCESS		27	-0.61307	-1.81219	0	0.0144415	1	1055	tags=44%, list=9%, signal=49%
KIM_WT1_TARGETS_UP	KIM_WT1_TARGETS_UP		151	-0.43605	-1.8117	0	0.0144959	1	1630	tags=28%, list=14%, signal=33%
GO_POSITIVE_REGULATION_OF_PROTEIN_SECRETION	GO_POSITIVE_REGULATION_OF_PROTEIN_SECRETION		124	-0.448589	-1.81117	0	0.0145562	1	2548	tags=41%, list=22%, signal=52%
GSE17974_IL4_AND_ANTI_IL12_VS_UNTREATED_12H_ACT_CD4_TCELL_DN	GSE17974_IL4_AND_ANTI_IL12_VS_UNTREATED_12H_ACT_CD4_TCELL_DN		89	-0.471319	-1.81101	0	0.0145651	1	1209	tags=26%, list=10%, signal=29%
GSE22886_DC_VS_MONOCYTE_DN	GSE22886_DC_VS_MONOCYTE_DN		161	-0.436803	-1.81079	0	0.0145762	1	1620	tags=27%, list=14%, signal=31%
GO_CALCIUM_MEDIATED_SIGNALING	GO_CALCIUM_MEDIATED_SIGNALING		46	-0.531931	-1.81049	0	0.0146157	1	1389	tags=35%, list=12%, signal=39%
GSE41176_UNSTIM_VS_ANTI_IGM_STIM_BCELL_1H_UP	GSE41176_UNSTIM_VS_ANTI_IGM_STIM_BCELL_1H_UP		139	-0.438345	-1.81021	0	0.0146409	1	2174	tags=35%, list=19%, signal=42%
OUYANG_PROSTATE_CANCER_PROGRESSION_UP	OUYANG_PROSTATE_CANCER_PROGRESSION_UP		15	-0.709685	-1.81013	0.00621118	0.0146333	1	611	tags=27%, list=5%, signal=28%
GSE17974_0H_VS_1H_IN_VITRO_ACT_CD4_TCELL_DN	GSE17974_0H_VS_1H_IN_VITRO_ACT_CD4_TCELL_DN		165	-0.422144	-1.80954	0	0.014699	1	1424	tags=22%, list=12%, signal=25%
GO_POSITIVE_REGULATION_OF_CYTOKINE_BIOSYNTHETIC_PROCESS	GO_POSITIVE_REGULATION_OF_CYTOKINE_BIOSYNTHETIC_PROCESS		37	-0.567103	-1.80947	0	0.0146854	1	928	tags=27%, list=8%, signal=29%
GO_RESPONSE_TO_TUMOR_NECROSIS_FACTOR	GO_RESPONSE_TO_TUMOR_NECROSIS_FACTOR		171	-0.430791	-1.80884	0	0.014779	1	1212	tags=19%, list=10%, signal=21%
GO_NEGATIVE_REGULATION_OF_PROTEIN_SECRETION	GO_NEGATIVE_REGULATION_OF_PROTEIN_SECRETION		58	-0.511207	-1.80864	0	0.0148079	1	1165	tags=28%, list=10%, signal=31%
GO_REGULATION_OF_PEPTIDE_SECRETION	GO_REGULATION_OF_PEPTIDE_SECRETION		103	-0.460202	-1.80798	0	0.014881	1	2368	tags=32%, list=20%, signal=40%
CREB_Q4	CREB_Q4		195	-0.423492	-1.80768	0	0.0148914	1	1546	tags=21%, list=13%, signal=23%
TAKEDA_TARGETS_OF_NUP98_HOXA9_FUSION_8D_DN	TAKEDA_TARGETS_OF_NUP98_HOXA9_FUSION_8D_DN		106	-0.453954	-1.80673	0	0.0150106	1	1910	tags=32%, list=16%, signal=38%
GO_RESPONSE_TO_CAMP	GO_RESPONSE_TO_CAMP		51	-0.519664	-1.80504	0	0.0152717	1	1209	tags=22%, list=10%, signal=24%
GSE3982_CTRL_VS_LPS_48H_DC_DN	GSE3982_CTRL_VS_LPS_48H_DC_DN		152	-0.439627	-1.80423	0	0.0153659	1	1414	tags=26%, list=12%, signal=30%
GO_POSITIVE_REGULATION_OF_IMMUNE_EFFECTOR_PROCESS	GO_POSITIVE_REGULATION_OF_IMMUNE_EFFECTOR_PROCESS		111	-0.454296	-1.80399	0	0.0153855	1	1756	tags=31%, list=15%, signal=36%
MODULE_188	MODULE_188		90	-0.462013	-1.8028	0	0.0155489	1	1616	tags=29%, list=14%, signal=33%
GO_REGULATION_OF_SMOOTH_MUSCLE_CELL_PROLIFERATION	GO_REGULATION_OF_SMOOTH_MUSCLE_CELL_PROLIFERATION		69	-0.491256	-1.80271	0	0.0155462	1	1178	tags=28%, list=10%, signal=30%
MODULE_55	MODULE_55		375	-0.389172	-1.80215	0	0.015627	1	2089	tags=28%, list=18%, signal=33%
DELYS_THYROID_CANCER_UP	DELYS_THYROID_CANCER_UP		259	-0.404126	-1.80164	0	0.0157196	1	1009	tags=20%, list=9%, signal=22%
BOQUEST_STEM_CELL_DN	BOQUEST_STEM_CELL_DN		130	-0.445913	-1.8009	0	0.0158105	1	1391	tags=31%, list=12%, signal=35%
GSE360_T_GONDII_VS_M_TUBERCULOSIS_DC_DN	GSE360_T_GONDII_VS_M_TUBERCULOSIS_DC_DN		120	-0.448681	-1.80074	0	0.0158173	1	1437	tags=29%, list=12%, signal=33%
GO_REGULATION_OF_T_CELL_MEDIATED_CYTOTOXICITY	GO_REGULATION_OF_T_CELL_MEDIATED_CYTOTOXICITY		20	-0.636667	-1.79989	0.00458716	0.015945	1	871	tags=35%, list=8%, signal=38%
GSE26343_WT_VS_NFAT5_KO_MACROPHAGE_DN	GSE26343_WT_VS_NFAT5_KO_MACROPHAGE_DN		158	-0.430519	-1.79896	0	0.0160705	1	1797	tags=32%, list=16%, signal=38%
GSE32164_RESTING_DIFFERENTIATED_VS_ALTERNATIVELY_ACT_M2_MACROPHAGE_DN	GSE32164_RESTING_DIFFERENTIATED_VS_ALTERNATIVELY_ACT_M2_MACROPHAGE_DN		172	-0.419207	-1.79866	0	0.0160829	1	2204	tags=35%, list=19%, signal=43%
GSE5589_LPS_VS_LPS_AND_IL10_STIM_IL10_KO_MACROPHAGE_45MIN_DN	GSE5589_LPS_VS_LPS_AND_IL10_STIM_IL10_KO_MACROPHAGE_45MIN_DN		136	-0.435576	-1.79854	0	0.0160815	1	1567	tags=29%, list=14%, signal=34%
GO_REGULATION_OF_STRIATED_MUSCLE_CONTRACTION	GO_REGULATION_OF_STRIATED_MUSCLE_CONTRACTION		38	-0.55019	-1.79839	0.00225734	0.0160901	1	3017	tags=63%, list=26%, signal=85%
GSE45739_UNSTIM_VS_ACD3_ACD28_STIM_NRAS_KO_CD4_TCELL_DN	GSE45739_UNSTIM_VS_ACD3_ACD28_STIM_NRAS_KO_CD4_TCELL_DN		127	-0.440534	-1.79833	0	0.0160807	1	1975	tags=31%, list=17%, signal=37%
GO_POSITIVE_REGULATION_OF_LIPID_BIOSYNTHETIC_PROCESS	GO_POSITIVE_REGULATION_OF_LIPID_BIOSYNTHETIC_PROCESS		40	-0.565836	-1.79763	0.0045045	0.0161758	1	1384	tags=30%, list=12%, signal=34%
GO_RESPONSE_TO_VIRUS	GO_RESPONSE_TO_VIRUS		181	-0.424055	-1.79693	0	0.0162744	1	1373	tags=27%, list=12%, signal=30%
GSE6269_HEALTHY_VS_STAPH_AUREUS_INF_PBMC_UP	GSE6269_HEALTHY_VS_STAPH_AUREUS_INF_PBMC_UP		149	-0.434298	-1.79647	0	0.0163258	1	1138	tags=23%, list=10%, signal=25%
WEST_ADRENOCORTICAL_TUMOR_DN	WEST_ADRENOCORTICAL_TUMOR_DN		328	-0.391527	-1.79608	0	0.0163751	1	1612	tags=20%, list=14%, signal=23%
LEIN_NEURON_MARKERS	LEIN_NEURON_MARKERS		33	-0.562701	-1.79573	0.00210526	0.0164104	1	1133	tags=24%, list=10%, signal=27%
WANG_LSD1_TARGETS_DN	WANG_LSD1_TARGETS_DN		18	-0.656721	-1.79564	0.00214133	0.0164085	1	489	tags=22%, list=4%, signal=23%
GO_REGULATION_OF_ALCOHOL_BIOSYNTHETIC_PROCESS	GO_REGULATION_OF_ALCOHOL_BIOSYNTHETIC_PROCESS		26	-0.612438	-1.79503	0	0.0165023	1	867	tags=27%, list=7%, signal=29%
LTE2_UP.V1_DN	LTE2_UP.V1_DN		143	-0.435891	-1.79456	0	0.0165625	1	1279	tags=29%, list=11%, signal=32%
STK33_UP	STK33_UP		205	-0.410751	-1.79454	0	0.016541	1	1173	tags=19%, list=10%, signal=20%
GO_REGULATION_OF_LEUKOCYTE_DIFFERENTIATION	GO_REGULATION_OF_LEUKOCYTE_DIFFERENTIATION		151	-0.426526	-1.79407	0	0.0166011	1	909	tags=21%, list=8%, signal=22%
KYNG_RESPONSE_TO_H2O2	KYNG_RESPONSE_TO_H2O2		59	-0.509008	-1.79373	0.00215517	0.0166398	1	1680	tags=31%, list=15%, signal=36%
WATTEL_AUTONOMOUS_THYROID_ADENOMA_DN	WATTEL_AUTONOMOUS_THYROID_ADENOMA_DN		26	-0.599422	-1.7933	0.00641026	0.0166803	1	1216	tags=35%, list=11%, signal=39%
GSE360_T_GONDII_VS_B_MALAYI_HIGH_DOSE_MAC_DN	GSE360_T_GONDII_VS_B_MALAYI_HIGH_DOSE_MAC_DN		151	-0.427487	-1.79319	0	0.0166877	1	1055	tags=24%, list=9%, signal=26%
AMUNDSON_GENOTOXIC_SIGNATURE	AMUNDSON_GENOTOXIC_SIGNATURE		85	-0.463722	-1.79297	0	0.0166951	1	825	tags=22%, list=7%, signal=24%
MODULE_79	MODULE_79		62	-0.503713	-1.79281	0	0.0166928	1	1596	tags=34%, list=14%, signal=39%
GO_ER_NUCLEUS_SIGNALING_PATHWAY	GO_ER_NUCLEUS_SIGNALING_PATHWAY		30	-0.58018	-1.79248	0.00424628	0.0167368	1	1691	tags=43%, list=15%, signal=51%
ELVIDGE_HYPOXIA_BY_DMOG_UP	ELVIDGE_HYPOXIA_BY_DMOG_UP		104	-0.452005	-1.79241	0	0.0167249	1	1419	tags=30%, list=12%, signal=34%
GSE17974_0H_VS_2H_IN_VITRO_ACT_CD4_TCELL_UP	GSE17974_0H_VS_2H_IN_VITRO_ACT_CD4_TCELL_UP		149	-0.431163	-1.79235	0	0.0167073	1	1521	tags=26%, list=13%, signal=30%
GO_REGULATION_OF_ALPHA_BETA_T_CELL_PROLIFERATION	GO_REGULATION_OF_ALPHA_BETA_T_CELL_PROLIFERATION		19	-0.659253	-1.79228	0.00638298	0.0166992	1	889	tags=47%, list=8%, signal=51%
GSE34006_WT_VS_A2AR_KO_TREG_UP	GSE34006_WT_VS_A2AR_KO_TREG_UP		133	-0.433443	-1.79225	0	0.0166817	1	1370	tags=26%, list=12%, signal=30%
GO_ENDODERM_DEVELOPMENT	GO_ENDODERM_DEVELOPMENT		32	-0.564982	-1.79184	0.00469484	0.0167349	1	1058	tags=28%, list=9%, signal=31%
GO_POSITIVE_REGULATION_OF_LOCOMOTION	GO_POSITIVE_REGULATION_OF_LOCOMOTION		229	-0.40878	-1.79165	0	0.016748	1	2413	tags=33%, list=21%, signal=41%
MORI_PRE_BI_LYMPHOCYTE_DN	MORI_PRE_BI_LYMPHOCYTE_DN		67	-0.495717	-1.79162	0	0.0167342	1	1950	tags=36%, list=17%, signal=43%
GO_TRANSPORT_VESICLE_MEMBRANE	GO_TRANSPORT_VESICLE_MEMBRANE		91	-0.471578	-1.79142	0	0.0167491	1	1878	tags=32%, list=16%, signal=38%
GSE1432_1H_VS_6H_IFNG_MICROGLIA_DN	GSE1432_1H_VS_6H_IFNG_MICROGLIA_DN		171	-0.424678	-1.7909	0	0.0168269	1	1797	tags=29%, list=16%, signal=34%
GO_POSITIVE_REGULATION_OF_CELL_ADHESION	GO_POSITIVE_REGULATION_OF_CELL_ADHESION		236	-0.412047	-1.79076	0	0.016834	1	2420	tags=35%, list=21%, signal=44%
BASAKI_YBX1_TARGETS_DN	BASAKI_YBX1_TARGETS_DN		291	-0.395031	-1.79042	0	0.0168694	1	1484	tags=25%, list=13%, signal=28%
DAZARD_RESPONSE_TO_UV_NHEK_UP	DAZARD_RESPONSE_TO_UV_NHEK_UP		173	-0.42657	-1.78927	0	0.0170808	1	1192	tags=23%, list=10%, signal=25%
GSE40666_UNTREATED_VS_IFNA_STIM_CD8_TCELL_90MIN_UP	GSE40666_UNTREATED_VS_IFNA_STIM_CD8_TCELL_90MIN_UP		64	-0.493179	-1.78923	0	0.0170668	1	1271	tags=22%, list=11%, signal=24%
GO_MYELOID_LEUKOCYTE_MEDIATED_IMMUNITY	GO_MYELOID_LEUKOCYTE_MEDIATED_IMMUNITY		28	-0.592218	-1.78888	0.00447427	0.0171	1	149	tags=11%, list=1%, signal=11%
GSE36888_STAT5_AB_KNOCKIN_VS_WT_TCELL_IL2_TREATED_17H_DN	GSE36888_STAT5_AB_KNOCKIN_VS_WT_TCELL_IL2_TREATED_17H_DN		144	-0.436586	-1.78771	0	0.0172723	1	1940	tags=29%, list=17%, signal=35%
GO_NEGATIVE_REGULATION_OF_VIRAL_PROCESS	GO_NEGATIVE_REGULATION_OF_VIRAL_PROCESS		65	-0.487317	-1.78766	0	0.0172599	1	1899	tags=37%, list=16%, signal=44%
GO_REGULATION_OF_SYSTEM_PROCESS	GO_REGULATION_OF_SYSTEM_PROCESS		224	-0.408722	-1.78743	0	0.017287	1	1995	tags=29%, list=17%, signal=34%
GSE2706_2H_VS_8H_R848_AND_LPS_STIM_DC_DN	GSE2706_2H_VS_8H_R848_AND_LPS_STIM_DC_DN		156	-0.429678	-1.78716	0	0.0173065	1	2276	tags=38%, list=20%, signal=47%
GO_T_CELL_DIFFERENTIATION	GO_T_CELL_DIFFERENTIATION		84	-0.474541	-1.7868	0.0021978	0.0173447	1	1035	tags=23%, list=9%, signal=25%
PID_ERBB1_DOWNSTREAM_PATHWAY	PID_ERBB1_DOWNSTREAM_PATHWAY		93	-0.458153	-1.78651	0	0.0173812	1	1261	tags=17%, list=11%, signal=19%
GO_POSITIVE_REGULATION_OF_TYROSINE_PHOSPHORYLATION_OF_STAT3_PROTEIN	GO_POSITIVE_REGULATION_OF_TYROSINE_PHOSPHORYLATION_OF_STAT3_PROTEIN		26	-0.588813	-1.78647	0.00214592	0.0173593	1	2453	tags=58%, list=21%, signal=73%
GSE360_CTRL_VS_T_GONDII_DC_DN	GSE360_CTRL_VS_T_GONDII_DC_DN		133	-0.436713	-1.78641	0	0.0173395	1	1529	tags=25%, list=13%, signal=28%
GO_REGULATION_OF_TUMOR_NECROSIS_FACTOR_SUPERFAMILY_CYTOKINE_PRODUCTION	GO_REGULATION_OF_TUMOR_NECROSIS_FACTOR_SUPERFAMILY_CYTOKINE_PRODUCTION		68	-0.495139	-1.78625	0	0.0173457	1	928	tags=25%, list=8%, signal=27%
GO_SARCOPLASMIC_RETICULUM_MEMBRANE	GO_SARCOPLASMIC_RETICULUM_MEMBRANE		18	-0.660826	-1.78591	0.00900901	0.0174058	1	1981	tags=50%, list=17%, signal=60%
DEBIASI_APOPTOSIS_BY_REOVIRUS_INFECTION_UP	DEBIASI_APOPTOSIS_BY_REOVIRUS_INFECTION_UP		265	-0.398425	-1.78574	0	0.0174027	1	1279	tags=23%, list=11%, signal=25%
CHARAFE_BREAST_CANCER_BASAL_VS_MESENCHYMAL_UP	CHARAFE_BREAST_CANCER_BASAL_VS_MESENCHYMAL_UP		55	-0.510679	-1.7855	0	0.017407	1	2133	tags=38%, list=18%, signal=47%
SHAFFER_IRF4_MULTIPLE_MYELOMA_PROGRAM	SHAFFER_IRF4_MULTIPLE_MYELOMA_PROGRAM		34	-0.564333	-1.78534	0.00444444	0.0174077	1	1121	tags=29%, list=10%, signal=32%
GO_CORE_PROMOTER_SEQUENCE_SPECIFIC_DNA_BINDING	GO_CORE_PROMOTER_SEQUENCE_SPECIFIC_DNA_BINDING		70	-0.481705	-1.7844	0	0.0175658	1	2072	tags=30%, list=18%, signal=36%
PARK_TRETINOIN_RESPONSE_AND_RARA_PLZF_FUSION	PARK_TRETINOIN_RESPONSE_AND_RARA_PLZF_FUSION		18	-0.660723	-1.78414	0.0040404	0.0175957	1	2639	tags=61%, list=23%, signal=79%
GSE46606_IRF4_KO_VS_WT_CD40L_IL2_IL5_3DAY_STIMULATED_BCELL_UP	GSE46606_IRF4_KO_VS_WT_CD40L_IL2_IL5_3DAY_STIMULATED_BCELL_UP		140	-0.428003	-1.784	0	0.0176052	1	1962	tags=32%, list=17%, signal=38%
WORSCHECH_TUMOR_REJECTION_UP	WORSCHECH_TUMOR_REJECTION_UP		33	-0.571524	-1.78346	0.00425532	0.0176886	1	2793	tags=61%, list=24%, signal=80%
GSE21360_NAIVE_VS_SECONDARY_MEMORY_CD8_TCELL_DN	GSE21360_NAIVE_VS_SECONDARY_MEMORY_CD8_TCELL_DN		133	-0.434654	-1.78345	0	0.0176667	1	1668	tags=28%, list=14%, signal=32%
GSE22886_DAY0_VS_DAY1_MONOCYTE_IN_CULTURE_UP	GSE22886_DAY0_VS_DAY1_MONOCYTE_IN_CULTURE_UP		160	-0.426399	-1.78295	0	0.0177406	1	1177	tags=19%, list=10%, signal=21%
CREB_Q2_01	CREB_Q2_01		157	-0.426301	-1.78294	0	0.0177205	1	1374	tags=22%, list=12%, signal=25%
KAECH_DAY15_EFF_VS_MEMORY_CD8_TCELL_DN	KAECH_DAY15_EFF_VS_MEMORY_CD8_TCELL_DN		161	-0.421865	-1.78221	0	0.0178345	1	976	tags=17%, list=8%, signal=19%
GSE26290_CTRL_VS_AKT_INHIBITOR_TREATED_ANTI_CD3_AND_IL2_STIM_CD8_TCELL_UP	GSE26290_CTRL_VS_AKT_INHIBITOR_TREATED_ANTI_CD3_AND_IL2_STIM_CD8_TCELL_UP		110	-0.444122	-1.78216	0	0.0178217	1	1787	tags=24%, list=15%, signal=28%
LAIHO_COLORECTAL_CANCER_SERRATED_UP	LAIHO_COLORECTAL_CANCER_SERRATED_UP		96	-0.461516	-1.78155	0.00219298	0.0179041	1	2207	tags=39%, list=19%, signal=47%
REACTOME_UNFOLDED_PROTEIN_RESPONSE	REACTOME_UNFOLDED_PROTEIN_RESPONSE		71	-0.483537	-1.78141	0	0.0179169	1	1731	tags=34%, list=15%, signal=40%
SPIRA_SMOKERS_LUNG_CANCER_UP	SPIRA_SMOKERS_LUNG_CANCER_UP		31	-0.570896	-1.78103	0.00222222	0.017957	1	1240	tags=32%, list=11%, signal=36%
SMIRNOV_RESPONSE_TO_IR_2HR_UP	SMIRNOV_RESPONSE_TO_IR_2HR_UP		44	-0.541322	-1.78041	0.00220264	0.0180535	1	739	tags=25%, list=6%, signal=27%
GSE43863_DAY6_EFF_VS_DAY150_MEM_TFH_CD4_TCELL_UP	GSE43863_DAY6_EFF_VS_DAY150_MEM_TFH_CD4_TCELL_UP		158	-0.428726	-1.77966	0	0.0181606	1	1728	tags=29%, list=15%, signal=34%
GSE34179_THPOK_KO_VS_WT_VA14I_NKTCELL_DN	GSE34179_THPOK_KO_VS_WT_VA14I_NKTCELL_DN		127	-0.4372	-1.77951	0.00224719	0.0181585	1	1471	tags=28%, list=13%, signal=31%
DER_IFN_GAMMA_RESPONSE_UP	DER_IFN_GAMMA_RESPONSE_UP		65	-0.491215	-1.77832	0.00430107	0.0183796	1	1831	tags=40%, list=16%, signal=47%
GO_DIVALENT_INORGANIC_CATION_TRANSPORT	GO_DIVALENT_INORGANIC_CATION_TRANSPORT		129	-0.433447	-1.77798	0	0.0184097	1	1670	tags=26%, list=14%, signal=30%
CHEN_HOXA5_TARGETS_9HR_UP	CHEN_HOXA5_TARGETS_9HR_UP		191	-0.415367	-1.77796	0	0.0183891	1	1257	tags=20%, list=11%, signal=23%
GSE29618_PDC_VS_MDC_DAY7_FLU_VACCINE_DN	GSE29618_PDC_VS_MDC_DAY7_FLU_VACCINE_DN		170	-0.420748	-1.77794	0	0.0183721	1	2262	tags=31%, list=20%, signal=38%
GARGALOVIC_RESPONSE_TO_OXIDIZED_PHOSPHOLIPIDS_BLUE_UP	GARGALOVIC_RESPONSE_TO_OXIDIZED_PHOSPHOLIPIDS_BLUE_UP		106	-0.446843	-1.77748	0	0.0184381	1	1764	tags=36%, list=15%, signal=42%
BAUS_TFF2_TARGETS_UP	BAUS_TFF2_TARGETS_UP		18	-0.654218	-1.77708	0.0040404	0.0184949	1	1813	tags=56%, list=16%, signal=66%
REACTOME_ION_CHANNEL_TRANSPORT	REACTOME_ION_CHANNEL_TRANSPORT		19	-0.638234	-1.7759	0.00852879	0.0186614	1	1554	tags=42%, list=13%, signal=49%
GSE2405_0H_VS_1.5H_A_PHAGOCYTOPHILUM_STIM_NEUTROPHIL_UP	GSE2405_0H_VS_1.5H_A_PHAGOCYTOPHILUM_STIM_NEUTROPHIL_UP		107	-0.446933	-1.77572	0	0.0186746	1	1886	tags=34%, list=16%, signal=40%
HNF3B_01	HNF3B_01		106	-0.451127	-1.77544	0	0.0186896	1	1482	tags=25%, list=13%, signal=29%
GO_REGULATION_OF_ADAPTIVE_IMMUNE_RESPONSE	GO_REGULATION_OF_ADAPTIVE_IMMUNE_RESPONSE		88	-0.462487	-1.77529	0	0.0186938	1	1025	tags=23%, list=9%, signal=25%
GO_POSITIVE_REGULATION_OF_MAPK_CASCADE	GO_POSITIVE_REGULATION_OF_MAPK_CASCADE		286	-0.392007	-1.77505	0	0.0187033	1	1212	tags=21%, list=10%, signal=22%
GSE17721_LPS_VS_GARDIQUIMOD_2H_BMDC_UP	GSE17721_LPS_VS_GARDIQUIMOD_2H_BMDC_UP		140	-0.432639	-1.77493	0	0.0187129	1	1777	tags=30%, list=15%, signal=35%
GSE29617_CTRL_VS_TIV_FLU_VACCINE_PBMC_2008_UP	GSE29617_CTRL_VS_TIV_FLU_VACCINE_PBMC_2008_UP		132	-0.433962	-1.774	0	0.0188637	1	1413	tags=26%, list=12%, signal=29%
GO_SUPEROXIDE_METABOLIC_PROCESS	GO_SUPEROXIDE_METABOLIC_PROCESS		17	-0.654091	-1.77345	0.00428265	0.0189463	1	400	tags=24%, list=3%, signal=24%
GSE45365_NK_CELL_VS_BCELL_UP	GSE45365_NK_CELL_VS_BCELL_UP		159	-0.429876	-1.77212	0	0.0192512	1	1944	tags=27%, list=17%, signal=32%
GSE19198_1H_VS_24H_IL21_TREATED_TCELL_DN	GSE19198_1H_VS_24H_IL21_TREATED_TCELL_DN		152	-0.419698	-1.77173	0	0.0193028	1	1881	tags=32%, list=16%, signal=37%
GSE10239_MEMORY_VS_DAY4.5_EFF_CD8_TCELL_UP	GSE10239_MEMORY_VS_DAY4.5_EFF_CD8_TCELL_UP		147	-0.42825	-1.77157	0	0.0193277	1	1504	tags=22%, list=13%, signal=25%
GO_REGULATION_OF_PROTEIN_SECRETION	GO_REGULATION_OF_PROTEIN_SECRETION		221	-0.408876	-1.77143	0	0.0193329	1	2580	tags=38%, list=22%, signal=47%
MISSIAGLIA_REGULATED_BY_METHYLATION_UP	MISSIAGLIA_REGULATED_BY_METHYLATION_UP		98	-0.461844	-1.77099	0	0.0194073	1	1630	tags=40%, list=14%, signal=46%
GO_POSITIVE_REGULATION_OF_VASCULATURE_DEVELOPMENT	GO_POSITIVE_REGULATION_OF_VASCULATURE_DEVELOPMENT		71	-0.48183	-1.77099	0	0.0193822	1	1998	tags=32%, list=17%, signal=39%
REACTOME_ION_TRANSPORT_BY_P_TYPE_ATPASES	REACTOME_ION_TRANSPORT_BY_P_TYPE_ATPASES		18	-0.640842	-1.77093	0.00707547	0.0193713	1	1554	tags=44%, list=13%, signal=51%
GO_REGULATION_OF_NEUROLOGICAL_SYSTEM_PROCESS	GO_REGULATION_OF_NEUROLOGICAL_SYSTEM_PROCESS		29	-0.571093	-1.77035	0.00430107	0.0194648	1	931	tags=28%, list=8%, signal=30%
SCHMIDT_POR_TARGETS_IN_LIMB_BUD_UP	SCHMIDT_POR_TARGETS_IN_LIMB_BUD_UP		22	-0.612946	-1.76948	0.00208768	0.0196391	1	3223	tags=68%, list=28%, signal=94%
GO_CELLULAR_RESPONSE_TO_TOPOLOGICALLY_INCORRECT_PROTEIN	GO_CELLULAR_RESPONSE_TO_TOPOLOGICALLY_INCORRECT_PROTEIN		103	-0.446274	-1.76915	0	0.0196809	1	1731	tags=31%, list=15%, signal=36%
GO_RESPONSE_TO_INTERFERON_BETA	GO_RESPONSE_TO_INTERFERON_BETA		19	-0.640142	-1.76807	0.00205761	0.0198668	1	1815	tags=47%, list=16%, signal=56%
ZHAN_MULTIPLE_MYELOMA_CD1_DN	ZHAN_MULTIPLE_MYELOMA_CD1_DN		37	-0.550268	-1.76778	0	0.0198959	1	1438	tags=38%, list=12%, signal=43%
CHANDRAN_METASTASIS_DN	CHANDRAN_METASTASIS_DN		181	-0.41221	-1.76709	0	0.0200055	1	1196	tags=19%, list=10%, signal=21%
GSE3039_CD4_TCELL_VS_ALPHABETA_CD8_TCELL_UP	GSE3039_CD4_TCELL_VS_ALPHABETA_CD8_TCELL_UP		115	-0.442774	-1.76701	0	0.0199922	1	763	tags=20%, list=7%, signal=21%
HALLMARK_HYPOXIA	HALLMARK_HYPOXIA		149	-0.427202	-1.76663	0	0.0200452	1	1428	tags=21%, list=12%, signal=24%
GO_REGULATION_OF_CELL_CELL_ADHESION	GO_REGULATION_OF_CELL_CELL_ADHESION		251	-0.398741	-1.76584	0	0.0201962	1	1763	tags=27%, list=15%, signal=31%
GSE9960_HEALTHY_VS_GRAM_POS_SEPSIS_PBMC_DN	GSE9960_HEALTHY_VS_GRAM_POS_SEPSIS_PBMC_DN		154	-0.424695	-1.76509	0	0.0203556	1	1879	tags=32%, list=16%, signal=37%
KIM_GLIS2_TARGETS_UP	KIM_GLIS2_TARGETS_UP		48	-0.52084	-1.76455	0.00217865	0.0204554	1	1594	tags=31%, list=14%, signal=36%
GSE18893_TCONV_VS_TREG_2H_TNF_STIM_DN	GSE18893_TCONV_VS_TREG_2H_TNF_STIM_DN		152	-0.423898	-1.76376	0	0.0205862	1	2014	tags=31%, list=17%, signal=37%
GSE21360_NAIVE_VS_QUATERNARY_MEMORY_CD8_TCELL_DN	GSE21360_NAIVE_VS_QUATERNARY_MEMORY_CD8_TCELL_DN		180	-0.408366	-1.76265	0	0.0208019	1	1365	tags=27%, list=12%, signal=30%
GSE2405_0H_VS_12H_A_PHAGOCYTOPHILUM_STIM_NEUTROPHIL_UP	GSE2405_0H_VS_12H_A_PHAGOCYTOPHILUM_STIM_NEUTROPHIL_UP		162	-0.419539	-1.76213	0	0.0208852	1	1869	tags=31%, list=16%, signal=36%
LINDGREN_BLADDER_CANCER_CLUSTER_2B	LINDGREN_BLADDER_CANCER_CLUSTER_2B		253	-0.396403	-1.7621	0	0.0208657	1	2102	tags=34%, list=18%, signal=41%
GO_REGULATION_OF_ALPHA_BETA_T_CELL_ACTIVATION	GO_REGULATION_OF_ALPHA_BETA_T_CELL_ACTIVATION		50	-0.511337	-1.76201	0.0021978	0.0208619	1	2453	tags=50%, list=21%, signal=63%
GSE17974_IL4_AND_ANTI_IL12_VS_UNTREATED_2H_ACT_CD4_TCELL_DN	GSE17974_IL4_AND_ANTI_IL12_VS_UNTREATED_2H_ACT_CD4_TCELL_DN		91	-0.451354	-1.76193	0	0.0208511	1	2703	tags=42%, list=23%, signal=54%
MODULE_88	MODULE_88		382	-0.377808	-1.7617	0	0.0208645	1	2071	tags=28%, list=18%, signal=33%
GO_ALPHA_BETA_T_CELL_ACTIVATION	GO_ALPHA_BETA_T_CELL_ACTIVATION		41	-0.527945	-1.76167	0	0.0208435	1	614	tags=27%, list=5%, signal=28%
DOANE_BREAST_CANCER_ESR1_UP	DOANE_BREAST_CANCER_ESR1_UP		41	-0.534867	-1.76154	0.0045045	0.0208466	1	1384	tags=32%, list=12%, signal=36%
MODULE_361	MODULE_361		91	-0.459984	-1.7611	0	0.0209223	1	1616	tags=30%, list=14%, signal=34%
ATF4_Q2	ATF4_Q2		173	-0.411247	-1.7609	0	0.020951	1	1539	tags=20%, list=13%, signal=23%
GSE22886_NAIVE_BCELL_VS_NEUTROPHIL_DN	GSE22886_NAIVE_BCELL_VS_NEUTROPHIL_DN		152	-0.428672	-1.76005	0	0.0210863	1	1835	tags=37%, list=16%, signal=43%
BRUNO_HEMATOPOIESIS	BRUNO_HEMATOPOIESIS		49	-0.517462	-1.75993	0	0.0210755	1	778	tags=22%, list=7%, signal=24%
ENK_UV_RESPONSE_EPIDERMIS_DN	ENK_UV_RESPONSE_EPIDERMIS_DN		381	-0.380737	-1.75968	0	0.021099	1	1569	tags=22%, list=14%, signal=24%
BERENJENO_TRANSFORMED_BY_RHOA_FOREVER_DN	BERENJENO_TRANSFORMED_BY_RHOA_FOREVER_DN		19	-0.637021	-1.75878	0.00663717	0.0212559	1	1935	tags=37%, list=17%, signal=44%
JECHLINGER_EPITHELIAL_TO_MESENCHYMAL_TRANSITION_UP	JECHLINGER_EPITHELIAL_TO_MESENCHYMAL_TRANSITION_UP		40	-0.532609	-1.75846	0.00219298	0.0213113	1	1737	tags=40%, list=15%, signal=47%
GO_POSITIVE_REGULATION_OF_CELL_ACTIVATION	GO_POSITIVE_REGULATION_OF_CELL_ACTIVATION		205	-0.40674	-1.75817	0	0.0213379	1	2453	tags=37%, list=21%, signal=46%
WALLACE_PROSTATE_CANCER_UP	WALLACE_PROSTATE_CANCER_UP		17	-0.659969	-1.75764	0.00436681	0.0214413	1	1220	tags=35%, list=11%, signal=39%
GSE21360_NAIVE_VS_PRIMARY_MEMORY_CD8_TCELL_DN	GSE21360_NAIVE_VS_PRIMARY_MEMORY_CD8_TCELL_DN		129	-0.431519	-1.75735	0	0.021464	1	1674	tags=28%, list=14%, signal=32%
REACTOME_IMMUNOREGULATORY_INTERACTIONS_BETWEEN_A_LYMPHOID_AND_A_NON_LYMPHOID_CELL	REACTOME_IMMUNOREGULATORY_INTERACTIONS_BETWEEN_A_LYMPHOID_AND_A_NON_LYMPHOID_CELL		35	-0.549636	-1.75702	0.00220751	0.0215173	1	1815	tags=46%, list=16%, signal=54%
GSE15330_HSC_VS_LYMPHOID_PRIMED_MULTIPOTENT_PROGENITOR_UP	GSE15330_HSC_VS_LYMPHOID_PRIMED_MULTIPOTENT_PROGENITOR_UP		154	-0.427015	-1.75684	0	0.0215416	1	1752	tags=27%, list=15%, signal=31%
GSE41176_UNSTIM_VS_ANTI_IGM_STIM_BCELL_3H_UP	GSE41176_UNSTIM_VS_ANTI_IGM_STIM_BCELL_3H_UP		143	-0.421149	-1.75659	0	0.0215625	1	2460	tags=38%, list=21%, signal=48%
LINDSTEDT_DENDRITIC_CELL_MATURATION_B	LINDSTEDT_DENDRITIC_CELL_MATURATION_B		46	-0.508835	-1.75609	0.0111359	0.0216461	1	1288	tags=35%, list=11%, signal=39%
GSE369_PRE_VS_POST_IL6_INJECTION_IFNG_WT_LIVER_UP	GSE369_PRE_VS_POST_IL6_INJECTION_IFNG_WT_LIVER_UP		101	-0.444028	-1.75608	0	0.0216228	1	1899	tags=30%, list=16%, signal=35%
GSE411_UNSTIM_VS_100MIN_IL6_STIM_SOCS3_KO_MACROPHAGE_DN	GSE411_UNSTIM_VS_100MIN_IL6_STIM_SOCS3_KO_MACROPHAGE_DN		156	-0.425184	-1.75569	0	0.0216789	1	2015	tags=33%, list=17%, signal=39%
GO_LIPOPOLYSACCHARIDE_MEDIATED_SIGNALING_PATHWAY	GO_LIPOPOLYSACCHARIDE_MEDIATED_SIGNALING_PATHWAY		25	-0.594116	-1.75545	0.00425532	0.0217198	1	2107	tags=40%, list=18%, signal=49%
GSE21360_NAIVE_VS_QUATERNARY_MEMORY_CD8_TCELL_UP	GSE21360_NAIVE_VS_QUATERNARY_MEMORY_CD8_TCELL_UP		186	-0.410258	-1.75545	0	0.0216931	1	1365	tags=26%, list=12%, signal=29%
GSE360_L_DONOVANI_VS_B_MALAYI_HIGH_DOSE_DC_UP	GSE360_L_DONOVANI_VS_B_MALAYI_HIGH_DOSE_DC_UP		135	-0.423689	-1.75535	0	0.0216917	1	1399	tags=22%, list=12%, signal=25%
GO_ALPHA_BETA_T_CELL_DIFFERENTIATION	GO_ALPHA_BETA_T_CELL_DIFFERENTIATION		34	-0.551122	-1.75518	0.00434783	0.0217189	1	614	tags=26%, list=5%, signal=28%
GNF2_MYD88	GNF2_MYD88		57	-0.492894	-1.75514	0	0.0217091	1	2349	tags=35%, list=20%, signal=44%
KAMIKUBO_MYELOID_CEBPA_NETWORK	KAMIKUBO_MYELOID_CEBPA_NETWORK		17	-0.652948	-1.75504	0.00950119	0.0217159	1	1288	tags=47%, list=11%, signal=53%
GO_REGULATION_OF_CYTOKINE_BIOSYNTHETIC_PROCESS	GO_REGULATION_OF_CYTOKINE_BIOSYNTHETIC_PROCESS		61	-0.495142	-1.75481	0.0021645	0.0217297	1	928	tags=21%, list=8%, signal=23%
BORLAK_LIVER_CANCER_EGF_UP	BORLAK_LIVER_CANCER_EGF_UP		40	-0.540555	-1.75428	0.00224719	0.0218135	1	1674	tags=38%, list=14%, signal=44%
GO_CELL_REDOX_HOMEOSTASIS	GO_CELL_REDOX_HOMEOSTASIS		47	-0.505992	-1.75393	0.00915332	0.0218608	1	1314	tags=23%, list=11%, signal=26%
GSE24671_CTRL_VS_SENDAI_VIRUS_INFECTED_MOUSE_SPLENOCYTES_UP	GSE24671_CTRL_VS_SENDAI_VIRUS_INFECTED_MOUSE_SPLENOCYTES_UP		108	-0.445431	-1.75356	0	0.0219293	1	1849	tags=29%, list=16%, signal=34%
GSE9960_HEALTHY_VS_GRAM_NEG_SEPSIS_PBMC_DN	GSE9960_HEALTHY_VS_GRAM_NEG_SEPSIS_PBMC_DN		159	-0.421488	-1.7535	0	0.0219193	1	1714	tags=28%, list=15%, signal=33%
GSE42088_UNINF_VS_LEISHMANIA_INF_DC_4H_DN	GSE42088_UNINF_VS_LEISHMANIA_INF_DC_4H_DN		166	-0.417184	-1.75311	0	0.0219808	1	1763	tags=27%, list=15%, signal=31%
KRAS.600.LUNG.BREAST_UP.V1_UP	KRAS.600.LUNG.BREAST_UP.V1_UP		102	-0.442819	-1.75311	0	0.0219558	1	890	tags=21%, list=8%, signal=22%
LEE_LIVER_CANCER_ACOX1_UP	LEE_LIVER_CANCER_ACOX1_UP		40	-0.538519	-1.7524	0	0.022079	1	1382	tags=33%, list=12%, signal=37%
GO_GRANULOCYTE_ACTIVATION	GO_GRANULOCYTE_ACTIVATION		15	-0.661959	-1.75229	0.00852879	0.0220788	1	1771	tags=27%, list=15%, signal=31%
GO_CELL_MOTILITY	GO_CELL_MOTILITY		438	-0.374188	-1.75203	0	0.0221017	1	1592	tags=21%, list=14%, signal=23%
GO_MYELOID_CELL_ACTIVATION_INVOLVED_IN_IMMUNE_RESPONSE	GO_MYELOID_CELL_ACTIVATION_INVOLVED_IN_IMMUNE_RESPONSE		31	-0.567191	-1.75041	0.00883002	0.0224721	1	909	tags=16%, list=8%, signal=17%
GO_REGULATION_OF_INTERLEUKIN_12_PRODUCTION	GO_REGULATION_OF_INTERLEUKIN_12_PRODUCTION		38	-0.537873	-1.75022	0.00439561	0.0224913	1	1190	tags=34%, list=10%, signal=38%
GSE25123_CTRL_VS_ROSIGLITAZONE_STIM_MACROPHAGE_UP	GSE25123_CTRL_VS_ROSIGLITAZONE_STIM_MACROPHAGE_UP		171	-0.406682	-1.75004	0	0.0225006	1	787	tags=13%, list=7%, signal=14%
ONO_AML1_TARGETS_UP	ONO_AML1_TARGETS_UP		19	-0.64314	-1.74964	0.00823045	0.0225675	1	477	tags=21%, list=4%, signal=22%
GSE37301_MULTIPOTENT_PROGENITOR_VS_LYMPHOID_PRIMED_MPP_DN	GSE37301_MULTIPOTENT_PROGENITOR_VS_LYMPHOID_PRIMED_MPP_DN		137	-0.423028	-1.74918	0	0.0226527	1	2246	tags=34%, list=19%, signal=42%
GO_POSITIVE_REGULATION_OF_HEMOPOIESIS	GO_POSITIVE_REGULATION_OF_HEMOPOIESIS		118	-0.442269	-1.74894	0	0.022688	1	2326	tags=40%, list=20%, signal=49%
GO_NEGATIVE_REGULATION_OF_OSSIFICATION	GO_NEGATIVE_REGULATION_OF_OSSIFICATION		30	-0.567243	-1.74876	0.00862069	0.0227004	1	739	tags=23%, list=6%, signal=25%
GO_NEGATIVE_REGULATION_OF_T_CELL_PROLIFERATION	GO_NEGATIVE_REGULATION_OF_T_CELL_PROLIFERATION		41	-0.52979	-1.74826	0.0022779	0.0228273	1	1271	tags=32%, list=11%, signal=35%
TURASHVILI_BREAST_DUCTAL_CARCINOMA_VS_DUCTAL_NORMAL_DN	TURASHVILI_BREAST_DUCTAL_CARCINOMA_VS_DUCTAL_NORMAL_DN		83	-0.458235	-1.74808	0	0.022864	1	1465	tags=24%, list=13%, signal=27%
MARZEC_IL2_SIGNALING_UP	MARZEC_IL2_SIGNALING_UP		92	-0.452176	-1.74634	0	0.0232707	1	2185	tags=40%, list=19%, signal=49%
GO_NEGATIVE_REGULATION_OF_LEUKOCYTE_PROLIFERATION	GO_NEGATIVE_REGULATION_OF_LEUKOCYTE_PROLIFERATION		52	-0.505587	-1.74603	0.00700935	0.0233085	1	1678	tags=33%, list=14%, signal=38%
GSE19401_UNSTIM_VS_PAM2CSK4_STIM_FOLLICULAR_DC_DN	GSE19401_UNSTIM_VS_PAM2CSK4_STIM_FOLLICULAR_DC_DN		175	-0.4105	-1.74565	0	0.0233673	1	1365	tags=24%, list=12%, signal=27%
MODULE_408	MODULE_408		16	-0.648861	-1.74532	0.00643777	0.0234357	1	1695	tags=63%, list=15%, signal=73%
GSE29618_BCELL_VS_PDC_DN	GSE29618_BCELL_VS_PDC_DN		152	-0.420244	-1.744	0	0.0237628	1	2052	tags=32%, list=18%, signal=39%
GSE40274_FOXP3_VS_FOXP3_AND_EOS_TRANSDUCED_ACTIVATED_CD4_TCELL_UP	GSE40274_FOXP3_VS_FOXP3_AND_EOS_TRANSDUCED_ACTIVATED_CD4_TCELL_UP		165	-0.412768	-1.74364	0	0.023829	1	1647	tags=27%, list=14%, signal=31%
WIERENGA_STAT5A_TARGETS_GROUP2	WIERENGA_STAT5A_TARGETS_GROUP2		48	-0.501348	-1.74319	0.0043384	0.0239129	1	1413	tags=27%, list=12%, signal=31%
GSE13522_CTRL_VS_T_CRUZI_Y_STRAIN_INF_SKIN_IFNAR_KO_DN	GSE13522_CTRL_VS_T_CRUZI_Y_STRAIN_INF_SKIN_IFNAR_KO_DN		146	-0.424776	-1.74312	0	0.0239026	1	1664	tags=29%, list=14%, signal=33%
KLEIN_PRIMARY_EFFUSION_LYMPHOMA_DN	KLEIN_PRIMARY_EFFUSION_LYMPHOMA_DN		56	-0.493885	-1.74305	0.00226244	0.0239018	1	2194	tags=43%, list=19%, signal=53%
GSE12845_NAIVE_VS_PRE_GC_TONSIL_BCELL_UP	GSE12845_NAIVE_VS_PRE_GC_TONSIL_BCELL_UP		147	-0.425951	-1.74267	0	0.0239741	1	1967	tags=30%, list=17%, signal=36%
KAAB_FAILED_HEART_VENTRICLE_DN	KAAB_FAILED_HEART_VENTRICLE_DN		38	-0.540675	-1.74152	0.00441501	0.0242245	1	1279	tags=37%, list=11%, signal=41%
GO_REGULATION_OF_LEUKOCYTE_MEDIATED_IMMUNITY	GO_REGULATION_OF_LEUKOCYTE_MEDIATED_IMMUNITY		115	-0.438106	-1.7415	0	0.0242041	1	1046	tags=22%, list=9%, signal=24%
MODULE_399	MODULE_399		44	-0.510018	-1.74133	0	0.0242144	1	2077	tags=39%, list=18%, signal=47%
CTGYNNCTYTAA_UNKNOWN	CTGYNNCTYTAA_UNKNOWN		48	-0.504328	-1.74113	0.00911162	0.0242295	1	1991	tags=46%, list=17%, signal=55%
STK33_NOMO_UP	STK33_NOMO_UP		199	-0.40182	-1.74051	0	0.0243733	1	1641	tags=23%, list=14%, signal=26%
KRAS.LUNG.BREAST_UP.V1_UP	KRAS.LUNG.BREAST_UP.V1_UP		52	-0.493423	-1.74038	0.00219298	0.0243704	1	890	tags=27%, list=8%, signal=29%
GSE39556_CD8A_DC_VS_NK_CELL_DN	GSE39556_CD8A_DC_VS_NK_CELL_DN		154	-0.416447	-1.74035	0	0.0243547	1	1535	tags=23%, list=13%, signal=26%
GSE34156_UNTREATED_VS_6H_TLR1_TLR2_LIGAND_TREATED_MONOCYTE_UP	GSE34156_UNTREATED_VS_6H_TLR1_TLR2_LIGAND_TREATED_MONOCYTE_UP		139	-0.42559	-1.74034	0	0.0243262	1	1704	tags=32%, list=15%, signal=38%
GSE34205_HEALTHY_VS_FLU_INF_INFANT_PBMC_DN	GSE34205_HEALTHY_VS_FLU_INF_INFANT_PBMC_DN		162	-0.415533	-1.73948	0	0.0245048	1	1403	tags=26%, list=12%, signal=29%
GSE42021_TREG_PLN_VS_CD24INT_TREG_THYMUS_UP	GSE42021_TREG_PLN_VS_CD24INT_TREG_THYMUS_UP		170	-0.41477	-1.73945	0	0.0244826	1	2364	tags=34%, list=20%, signal=42%
GSE17974_0H_VS_48H_IN_VITRO_ACT_CD4_TCELL_UP	GSE17974_0H_VS_48H_IN_VITRO_ACT_CD4_TCELL_UP		129	-0.432432	-1.73819	0	0.0247617	1	2061	tags=29%, list=18%, signal=35%
GO_DISULFIDE_OXIDOREDUCTASE_ACTIVITY	GO_DISULFIDE_OXIDOREDUCTASE_ACTIVITY		20	-0.616042	-1.73686	0.00214592	0.0250701	1	1383	tags=35%, list=12%, signal=40%
GSE42021_CD24INT_VS_CD24LOW_TCONV_THYMUS_UP	GSE42021_CD24INT_VS_CD24LOW_TCONV_THYMUS_UP		131	-0.424673	-1.7363	0	0.0251571	1	2017	tags=28%, list=17%, signal=34%
GSE42021_TCONV_PLN_VS_TREG_PRECURSORS_THYMUS_DN	GSE42021_TCONV_PLN_VS_TREG_PRECURSORS_THYMUS_DN		163	-0.411576	-1.73542	0	0.0253478	1	2364	tags=37%, list=20%, signal=46%
MODULE_157	MODULE_157		43	-0.519242	-1.73505	0.00417537	0.0254076	1	1613	tags=30%, list=14%, signal=35%
REACTOME_ACTIVATION_OF_CHAPERONE_GENES_BY_XBP1S	REACTOME_ACTIVATION_OF_CHAPERONE_GENES_BY_XBP1S		42	-0.521919	-1.73485	0.00220751	0.0254433	1	1731	tags=36%, list=15%, signal=42%
CHUANG_OXIDATIVE_STRESS_RESPONSE_UP	CHUANG_OXIDATIVE_STRESS_RESPONSE_UP		21	-0.607508	-1.73438	0.00431035	0.0255331	1	319	tags=19%, list=3%, signal=20%
SCHOEN_NFKB_SIGNALING	SCHOEN_NFKB_SIGNALING		19	-0.634012	-1.73435	0.0109409	0.0255099	1	1181	tags=42%, list=10%, signal=47%
SRF_Q4	SRF_Q4		134	-0.423976	-1.73407	0	0.0255392	1	1358	tags=21%, list=12%, signal=23%
BMI1_DN_MEL18_DN.V1_DN	BMI1_DN_MEL18_DN.V1_DN		79	-0.462288	-1.73394	0	0.0255493	1	1392	tags=27%, list=12%, signal=30%
ROSS_AML_WITH_CBFB_MYH11_FUSION	ROSS_AML_WITH_CBFB_MYH11_FUSION		38	-0.532126	-1.73371	0.00220264	0.0255751	1	2363	tags=39%, list=20%, signal=49%
VERHAAK_AML_WITH_NPM1_MUTATED_UP	VERHAAK_AML_WITH_NPM1_MUTATED_UP		117	-0.432429	-1.73333	0	0.0256468	1	1787	tags=32%, list=15%, signal=38%
GSE27859_MACROPHAGE_VS_CD11C_INT_F480_HI_MACROPHAGE_UP	GSE27859_MACROPHAGE_VS_CD11C_INT_F480_HI_MACROPHAGE_UP		148	-0.421181	-1.73326	0	0.0256331	1	1637	tags=28%, list=14%, signal=32%
GSE22886_NAIVE_CD4_TCELL_VS_MONOCYTE_DN	GSE22886_NAIVE_CD4_TCELL_VS_MONOCYTE_DN		168	-0.408867	-1.73322	0	0.0256068	1	1708	tags=29%, list=15%, signal=33%
GO_OLIGOSACCHARIDE_METABOLIC_PROCESS	GO_OLIGOSACCHARIDE_METABOLIC_PROCESS		42	-0.524746	-1.73305	0.00646552	0.02562	1	1972	tags=38%, list=17%, signal=46%
LIAN_LIPA_TARGETS_3M	LIAN_LIPA_TARGETS_3M		30	-0.567318	-1.73297	0.00858369	0.0256032	1	1454	tags=40%, list=13%, signal=46%
CHIANG_LIVER_CANCER_SUBCLASS_UNANNOTATED_UP	CHIANG_LIVER_CANCER_SUBCLASS_UNANNOTATED_UP		49	-0.506619	-1.73248	0.00438597	0.025698	1	1209	tags=20%, list=10%, signal=23%
GSE16697_CD4_TCELL_VS_TFH_CD4_TCELL_UP	GSE16697_CD4_TCELL_VS_TFH_CD4_TCELL_UP		163	-0.418925	-1.73147	0	0.0258816	1	1847	tags=29%, list=16%, signal=34%
GSE46242_TH1_VS_ANERGIC_TH1_CD4_TCELL_UP	GSE46242_TH1_VS_ANERGIC_TH1_CD4_TCELL_UP		135	-0.422715	-1.73143	0	0.0258709	1	1564	tags=29%, list=14%, signal=33%
GO_ENDOPLASMIC_RETICULUM_CALCIUM_ION_HOMEOSTASIS	GO_ENDOPLASMIC_RETICULUM_CALCIUM_ION_HOMEOSTASIS		20	-0.606379	-1.73137	0.00420168	0.0258586	1	266	tags=30%, list=2%, signal=31%
GO_REGULATION_OF_PEPTIDE_TRANSPORT	GO_REGULATION_OF_PEPTIDE_TRANSPORT		135	-0.418932	-1.73059	0	0.0260339	1	2292	tags=31%, list=20%, signal=38%
GSE29618_PDC_VS_MDC_UP	GSE29618_PDC_VS_MDC_UP		151	-0.419821	-1.73052	0	0.0260215	1	2346	tags=36%, list=20%, signal=45%
GO_COATED_VESICLE_MEMBRANE	GO_COATED_VESICLE_MEMBRANE		101	-0.439455	-1.72999	0	0.026137	1	1946	tags=32%, list=17%, signal=38%
GO_POSITIVE_REGULATION_OF_INTERLEUKIN_1_SECRETION	GO_POSITIVE_REGULATION_OF_INTERLEUKIN_1_SECRETION		16	-0.649489	-1.72946	0.0164319	0.0262319	1	2529	tags=56%, list=22%, signal=72%
GSE21063_CTRL_VS_ANTI_IGM_STIM_BCELL_8H_UP	GSE21063_CTRL_VS_ANTI_IGM_STIM_BCELL_8H_UP		98	-0.440403	-1.7292	0	0.0262754	1	1752	tags=33%, list=15%, signal=38%
GO_PEPTIDYL_TYROSINE_AUTOPHOSPHORYLATION	GO_PEPTIDYL_TYROSINE_AUTOPHOSPHORYLATION		27	-0.565223	-1.72854	0.00436681	0.0264104	1	2813	tags=59%, list=24%, signal=78%
GO_REGULATION_OF_CARDIAC_MUSCLE_CONTRACTION	GO_REGULATION_OF_CARDIAC_MUSCLE_CONTRACTION		34	-0.537276	-1.72842	0.00619835	0.0264239	1	1632	tags=38%, list=14%, signal=44%
GO_POSITIVE_REGULATION_OF_INTERLEUKIN_12_PRODUCTION	GO_POSITIVE_REGULATION_OF_INTERLEUKIN_12_PRODUCTION		23	-0.593442	-1.72825	0.0107066	0.0264328	1	1190	tags=39%, list=10%, signal=44%
PID_FCER1_PATHWAY	PID_FCER1_PATHWAY		54	-0.49222	-1.72736	0.00439561	0.0266586	1	1478	tags=22%, list=13%, signal=25%
GO_NEGATIVE_REGULATION_OF_HORMONE_SECRETION	GO_NEGATIVE_REGULATION_OF_HORMONE_SECRETION		36	-0.53674	-1.7265	0.00234192	0.0268469	1	879	tags=19%, list=8%, signal=21%
GO_NON_MEMBRANE_SPANNING_PROTEIN_TYROSINE_KINASE_ACTIVITY	GO_NON_MEMBRANE_SPANNING_PROTEIN_TYROSINE_KINASE_ACTIVITY		36	-0.53422	-1.72635	0.0083682	0.0268675	1	2813	tags=61%, list=24%, signal=80%
CONCANNON_APOPTOSIS_BY_EPOXOMICIN_UP	CONCANNON_APOPTOSIS_BY_EPOXOMICIN_UP		188	-0.403471	-1.72622	0	0.026882	1	1049	tags=19%, list=9%, signal=21%
GO_RESPONSE_TO_TOPOLOGICALLY_INCORRECT_PROTEIN	GO_RESPONSE_TO_TOPOLOGICALLY_INCORRECT_PROTEIN		136	-0.420523	-1.7262	0	0.0268564	1	1384	tags=25%, list=12%, signal=28%
GARY_CD5_TARGETS_UP	GARY_CD5_TARGETS_UP		423	-0.374125	-1.72605	0	0.0268756	1	1917	tags=26%, list=17%, signal=31%
GSE9960_GRAM_NEG_VS_GRAM_POS_SEPSIS_PBMC_UP	GSE9960_GRAM_NEG_VS_GRAM_POS_SEPSIS_PBMC_UP		148	-0.421898	-1.72545	0	0.0269963	1	1630	tags=29%, list=14%, signal=33%
GSE24142_DN2_VS_DN3_THYMOCYTE_UP	GSE24142_DN2_VS_DN3_THYMOCYTE_UP		149	-0.411527	-1.72545	0	0.0269691	1	1805	tags=30%, list=16%, signal=35%
GSE40274_FOXP3_VS_FOXP3_AND_PBX1_TRANSDUCED_ACTIVATED_CD4_TCELL_DN	GSE40274_FOXP3_VS_FOXP3_AND_PBX1_TRANSDUCED_ACTIVATED_CD4_TCELL_DN		149	-0.41009	-1.72509	0	0.0270512	1	1023	tags=19%, list=9%, signal=21%
LEE_LIVER_CANCER_DENA_UP	LEE_LIVER_CANCER_DENA_UP		38	-0.527106	-1.72504	0.00220264	0.0270349	1	2290	tags=42%, list=20%, signal=52%
GSE29618_BCELL_VS_MONOCYTE_DN	GSE29618_BCELL_VS_MONOCYTE_DN		163	-0.411329	-1.72499	0	0.0270139	1	1917	tags=28%, list=17%, signal=33%
SRF_Q6	SRF_Q6		144	-0.41551	-1.72498	0	0.0269869	1	2171	tags=30%, list=19%, signal=36%
GNF2_TNFSF10	GNF2_TNFSF10		22	-0.608229	-1.72368	0.012959	0.0272869	1	3061	tags=55%, list=26%, signal=74%
GO_ANTIGEN_PROCESSING_AND_PRESENTATION_OF_ENDOGENOUS_ANTIGEN	GO_ANTIGEN_PROCESSING_AND_PRESENTATION_OF_ENDOGENOUS_ANTIGEN		15	-0.648532	-1.72229	0.00622407	0.0276216	1	1477	tags=53%, list=13%, signal=61%
WIERENGA_STAT5A_TARGETS_UP	WIERENGA_STAT5A_TARGETS_UP		157	-0.415318	-1.72165	0	0.0277526	1	523	tags=12%, list=5%, signal=13%
MODULE_238	MODULE_238		100	-0.445486	-1.72129	0	0.0278071	1	1616	tags=27%, list=14%, signal=31%
GSE6259_FLT3L_INDUCED_DEC205_POS_DC_VS_CD8_TCELL_DN	GSE6259_FLT3L_INDUCED_DEC205_POS_DC_VS_CD8_TCELL_DN		138	-0.419636	-1.72117	0	0.0278142	1	1346	tags=28%, list=12%, signal=31%
GO_VOLTAGE_GATED_CATION_CHANNEL_ACTIVITY	GO_VOLTAGE_GATED_CATION_CHANNEL_ACTIVITY		33	-0.549083	-1.72108	0.00440529	0.0278031	1	1893	tags=30%, list=16%, signal=36%
KEGG_PRION_DISEASES	KEGG_PRION_DISEASES		22	-0.613913	-1.72092	0.010846	0.0278209	1	1478	tags=27%, list=13%, signal=31%
GO_POSITIVE_REGULATION_OF_OSTEOCLAST_DIFFERENTIATION	GO_POSITIVE_REGULATION_OF_OSTEOCLAST_DIFFERENTIATION		19	-0.6357	-1.72075	0.0106157	0.0278387	1	1471	tags=42%, list=13%, signal=48%
GO_REGULATION_OF_INNATE_IMMUNE_RESPONSE	GO_REGULATION_OF_INNATE_IMMUNE_RESPONSE		269	-0.384924	-1.72034	0	0.0279124	1	1373	tags=23%, list=12%, signal=26%
GO_REGULATION_OF_HOMOTYPIC_CELL_CELL_ADHESION	GO_REGULATION_OF_HOMOTYPIC_CELL_CELL_ADHESION		214	-0.399699	-1.72014	0	0.0279344	1	2479	tags=34%, list=21%, signal=43%
GO_CYTOSOLIC_CALCIUM_ION_TRANSPORT	GO_CYTOSOLIC_CALCIUM_ION_TRANSPORT		33	-0.54592	-1.71995	0.00423729	0.027952	1	1462	tags=30%, list=13%, signal=35%
LU_IL4_SIGNALING	LU_IL4_SIGNALING		82	-0.453604	-1.71963	0	0.0280195	1	2045	tags=35%, list=18%, signal=43%
WANG_RESPONSE_TO_FORSKOLIN_UP	WANG_RESPONSE_TO_FORSKOLIN_UP		17	-0.655064	-1.7196	0.012931	0.0279978	1	2068	tags=53%, list=18%, signal=64%
HALLMARK_COMPLEMENT	HALLMARK_COMPLEMENT		136	-0.417765	-1.71952	0	0.0279851	1	2755	tags=39%, list=24%, signal=51%
JACKSON_DNMT1_TARGETS_UP	JACKSON_DNMT1_TARGETS_UP		56	-0.482712	-1.71917	0.00440529	0.0280479	1	982	tags=23%, list=8%, signal=25%
GO_LEUKOCYTE_ACTIVATION	GO_LEUKOCYTE_ACTIVATION		288	-0.37968	-1.71912	0	0.0280337	1	2264	tags=31%, list=20%, signal=37%
MONNIER_POSTRADIATION_TUMOR_ESCAPE_DN	MONNIER_POSTRADIATION_TUMOR_ESCAPE_DN		285	-0.383785	-1.71901	0	0.0280286	1	1437	tags=21%, list=12%, signal=24%
BROWNE_HCMV_INFECTION_8HR_UP	BROWNE_HCMV_INFECTION_8HR_UP		74	-0.459228	-1.71823	0.00217391	0.0281988	1	1153	tags=20%, list=10%, signal=22%
GO_MYELOID_LEUKOCYTE_ACTIVATION	GO_MYELOID_LEUKOCYTE_ACTIVATION		65	-0.474587	-1.71716	0.00226244	0.0284634	1	2264	tags=26%, list=20%, signal=32%
RUTELLA_RESPONSE_TO_HGF_VS_CSF2RB_AND_IL4_UP	RUTELLA_RESPONSE_TO_HGF_VS_CSF2RB_AND_IL4_UP		320	-0.381257	-1.71714	0	0.0284399	1	1972	tags=28%, list=17%, signal=33%
GO_REGULATION_OF_T_CELL_DIFFERENTIATION	GO_REGULATION_OF_T_CELL_DIFFERENTIATION		70	-0.464899	-1.71671	0	0.0285119	1	1025	tags=24%, list=9%, signal=26%
NATSUME_RESPONSE_TO_INTERFERON_BETA_UP	NATSUME_RESPONSE_TO_INTERFERON_BETA_UP		54	-0.484352	-1.7156	0.00854701	0.0287929	1	1132	tags=28%, list=10%, signal=31%
TARTE_PLASMA_CELL_VS_B_LYMPHOCYTE_UP	TARTE_PLASMA_CELL_VS_B_LYMPHOCYTE_UP		69	-0.466983	-1.71555	0.00202429	0.0287676	1	1973	tags=30%, list=17%, signal=36%
GSE32986_CURDLAN_LOWDOSE_VS_CURDLAN_HIGHDOSE_STIM_DC_DN	GSE32986_CURDLAN_LOWDOSE_VS_CURDLAN_HIGHDOSE_STIM_DC_DN		156	-0.405664	-1.71506	0	0.0288871	1	1834	tags=32%, list=16%, signal=38%
PUIFFE_INVASION_INHIBITED_BY_ASCITES_DN	PUIFFE_INVASION_INHIBITED_BY_ASCITES_DN		123	-0.423956	-1.71444	0	0.0290179	1	1642	tags=28%, list=14%, signal=32%
NAKAYAMA_SOFT_TISSUE_TUMORS_PCA1_UP	NAKAYAMA_SOFT_TISSUE_TUMORS_PCA1_UP		41	-0.518296	-1.714	0.00934579	0.029095	1	938	tags=29%, list=8%, signal=32%
GEISS_RESPONSE_TO_DSRNA_UP	GEISS_RESPONSE_TO_DSRNA_UP		33	-0.548963	-1.71345	0.00894855	0.0292346	1	1630	tags=27%, list=14%, signal=32%
JOHNSTONE_PARVB_TARGETS_3_UP	JOHNSTONE_PARVB_TARGETS_3_UP		322	-0.374841	-1.71288	0	0.0293689	1	1776	tags=26%, list=15%, signal=30%
GSE24634_TREG_VS_TCONV_POST_DAY5_IL4_CONVERSION_DN	GSE24634_TREG_VS_TCONV_POST_DAY5_IL4_CONVERSION_DN		161	-0.40843	-1.71287	0	0.0293387	1	2156	tags=37%, list=19%, signal=44%
GO_POSITIVE_REGULATION_OF_CYTOKINE_SECRETION	GO_POSITIVE_REGULATION_OF_CYTOKINE_SECRETION		60	-0.483366	-1.71273	0.0022173	0.0293456	1	2949	tags=55%, list=25%, signal=73%
GO_SYNAPTIC_VESICLE_CYCLE	GO_SYNAPTIC_VESICLE_CYCLE		40	-0.519547	-1.71251	0.00656455	0.0293554	1	1046	tags=25%, list=9%, signal=27%
GSE30971_CTRL_VS_LPS_STIM_MACROPHAGE_WBP7_KO_2H_UP	GSE30971_CTRL_VS_LPS_STIM_MACROPHAGE_WBP7_KO_2H_UP		134	-0.416641	-1.71199	0.00220264	0.0294906	1	2453	tags=39%, list=21%, signal=49%
GSE3982_BCELL_VS_CENT_MEMORY_CD4_TCELL_UP	GSE3982_BCELL_VS_CENT_MEMORY_CD4_TCELL_UP		163	-0.411632	-1.71181	0	0.0295031	1	1567	tags=29%, list=14%, signal=33%
GSE17721_LPS_VS_PAM3CSK4_8H_BMDC_UP	GSE17721_LPS_VS_PAM3CSK4_8H_BMDC_UP		149	-0.415095	-1.71171	0	0.0295009	1	2089	tags=32%, list=18%, signal=38%
HIRSCH_CELLULAR_TRANSFORMATION_SIGNATURE_UP	HIRSCH_CELLULAR_TRANSFORMATION_SIGNATURE_UP		201	-0.39476	-1.7109	0	0.0297107	1	1815	tags=29%, list=16%, signal=34%
BCAT.100_UP.V1_UP	BCAT.100_UP.V1_UP		30	-0.561465	-1.7102	0.00879121	0.0298746	1	1007	tags=33%, list=9%, signal=36%
MEK_UP.V1_UP	MEK_UP.V1_UP		128	-0.421973	-1.70948	0	0.0300278	1	1163	tags=23%, list=10%, signal=26%
LEE_NEURAL_CREST_STEM_CELL_DN	LEE_NEURAL_CREST_STEM_CELL_DN		66	-0.474567	-1.70947	0	0.0300001	1	2311	tags=42%, list=20%, signal=53%
KUROZUMI_RESPONSE_TO_ONCOCYTIC_VIRUS	KUROZUMI_RESPONSE_TO_ONCOCYTIC_VIRUS		31	-0.551425	-1.70819	0.00923787	0.0303554	1	1616	tags=32%, list=14%, signal=37%
FOSTER_TOLERANT_MACROPHAGE_DN	FOSTER_TOLERANT_MACROPHAGE_DN		325	-0.379365	-1.70775	0	0.0304579	1	1893	tags=29%, list=16%, signal=34%
TAVOR_CEBPA_TARGETS_DN	TAVOR_CEBPA_TARGETS_DN		21	-0.612821	-1.70761	0.00681818	0.0304591	1	1279	tags=52%, list=11%, signal=59%
REACTOME_ER_PHAGOSOME_PATHWAY	REACTOME_ER_PHAGOSOME_PATHWAY		56	-0.484559	-1.70751	0.00234742	0.0304471	1	1132	tags=25%, list=10%, signal=28%
GO_PROTEIN_N_LINKED_GLYCOSYLATION	GO_PROTEIN_N_LINKED_GLYCOSYLATION		60	-0.482955	-1.7074	0.00441501	0.0304366	1	1613	tags=30%, list=14%, signal=35%
GO_CELL_ACTIVATION	GO_CELL_ACTIVATION		376	-0.372874	-1.70728	0	0.030432	1	2035	tags=28%, list=18%, signal=33%
GSE13738_RESTING_VS_BYSTANDER_ACTIVATED_CD4_TCELL_DN	GSE13738_RESTING_VS_BYSTANDER_ACTIVATED_CD4_TCELL_DN		171	-0.408317	-1.70688	0	0.0305191	1	1535	tags=26%, list=13%, signal=29%
GSE369_PRE_VS_POST_IL6_INJECTION_SOCS3_KO_LIVER_UP	GSE369_PRE_VS_POST_IL6_INJECTION_SOCS3_KO_LIVER_UP		168	-0.409687	-1.70688	0	0.0304867	1	1691	tags=30%, list=15%, signal=34%
GSE3565_CTRL_VS_LPS_INJECTED_SPLENOCYTES_UP	GSE3565_CTRL_VS_LPS_INJECTED_SPLENOCYTES_UP		132	-0.414282	-1.70684	0	0.0304631	1	1024	tags=26%, list=9%, signal=28%
CHO_NR4A1_TARGETS	CHO_NR4A1_TARGETS		19	-0.620506	-1.7065	0.0155211	0.0305356	1	1752	tags=58%, list=15%, signal=68%
MODULE_456	MODULE_456		87	-0.445358	-1.7063	0.00214592	0.0305613	1	1973	tags=28%, list=17%, signal=33%
MODULE_24	MODULE_24		206	-0.393979	-1.70611	0	0.0305726	1	1684	tags=24%, list=15%, signal=28%
KEGG_O_GLYCAN_BIOSYNTHESIS	KEGG_O_GLYCAN_BIOSYNTHESIS		16	-0.638457	-1.70582	0.0107296	0.0306169	1	669	tags=31%, list=6%, signal=33%
GSE5542_IFNA_VS_IFNA_AND_IFNG_TREATED_EPITHELIAL_CELLS_24H_UP	GSE5542_IFNA_VS_IFNA_AND_IFNG_TREATED_EPITHELIAL_CELLS_24H_UP		137	-0.414024	-1.70556	0	0.0306658	1	1412	tags=25%, list=12%, signal=28%
CHIANG_LIVER_CANCER_SUBCLASS_INTERFERON_UP	CHIANG_LIVER_CANCER_SUBCLASS_INTERFERON_UP		16	-0.630383	-1.70536	0.00616016	0.0306871	1	1279	tags=38%, list=11%, signal=42%
GO_EXOCRINE_SYSTEM_DEVELOPMENT	GO_EXOCRINE_SYSTEM_DEVELOPMENT		17	-0.63608	-1.70525	0.00852879	0.0306908	1	2453	tags=65%, list=21%, signal=82%
GO_POSITIVE_REGULATION_OF_REACTIVE_OXYGEN_SPECIES_BIOSYNTHETIC_PROCESS	GO_POSITIVE_REGULATION_OF_REACTIVE_OXYGEN_SPECIES_BIOSYNTHETIC_PROCESS		31	-0.544942	-1.70523	0.0104822	0.0306629	1	1155	tags=29%, list=10%, signal=32%
GSE7460_TCONV_VS_TREG_LN_DN	GSE7460_TCONV_VS_TREG_LN_DN		154	-0.40713	-1.70429	0	0.0309101	1	2456	tags=35%, list=21%, signal=44%
GO_POSITIVE_REGULATION_OF_NF_KAPPAB_IMPORT_INTO_NUCLEUS	GO_POSITIVE_REGULATION_OF_NF_KAPPAB_IMPORT_INTO_NUCLEUS		15	-0.655732	-1.70411	0.012959	0.0309382	1	793	tags=40%, list=7%, signal=43%
TGFB_UP.V1_DN	TGFB_UP.V1_DN		115	-0.429882	-1.70407	0	0.0309186	1	1781	tags=28%, list=15%, signal=33%
GO_REGULATION_OF_SECRETION	GO_REGULATION_OF_SECRETION		370	-0.369947	-1.70335	0	0.0310902	1	2461	tags=31%, list=21%, signal=38%
GO_NEGATIVE_REGULATION_OF_HOMOTYPIC_CELL_CELL_ADHESION	GO_NEGATIVE_REGULATION_OF_HOMOTYPIC_CELL_CELL_ADHESION		72	-0.461655	-1.70322	0	0.0310964	1	2479	tags=43%, list=21%, signal=54%
GO_REGULATION_OF_RYANODINE_SENSITIVE_CALCIUM_RELEASE_CHANNEL_ACTIVITY	GO_REGULATION_OF_RYANODINE_SENSITIVE_CALCIUM_RELEASE_CHANNEL_ACTIVITY		15	-0.657089	-1.70302	0.0150862	0.0311329	1	2247	tags=53%, list=19%, signal=66%
GSE7460_TCONV_VS_TREG_THYMUS_DN	GSE7460_TCONV_VS_TREG_THYMUS_DN		151	-0.41059	-1.70248	0	0.0312752	1	2597	tags=40%, list=22%, signal=51%
GO_REGULATION_OF_NITRIC_OXIDE_BIOSYNTHETIC_PROCESS	GO_REGULATION_OF_NITRIC_OXIDE_BIOSYNTHETIC_PROCESS		32	-0.549902	-1.70228	0.00458716	0.0313026	1	2453	tags=47%, list=21%, signal=59%
GO_CELLULAR_CHEMICAL_HOMEOSTASIS	GO_CELLULAR_CHEMICAL_HOMEOSTASIS		278	-0.382186	-1.70157	0	0.0314871	1	1598	tags=23%, list=14%, signal=26%
GSE26290_WT_VS_PDK1_KO_ANTI_CD3_AND_IL2_STIM_CD8_TCELL_UP	GSE26290_WT_VS_PDK1_KO_ANTI_CD3_AND_IL2_STIM_CD8_TCELL_UP		150	-0.406534	-1.70147	0	0.0314814	1	2592	tags=36%, list=22%, signal=46%
GSE360_L_MAJOR_VS_B_MALAYI_HIGH_DOSE_DC_UP	GSE360_L_MAJOR_VS_B_MALAYI_HIGH_DOSE_DC_UP		132	-0.414897	-1.70015	0	0.0318732	1	999	tags=20%, list=9%, signal=21%
GO_GLIAL_CELL_MIGRATION	GO_GLIAL_CELL_MIGRATION		16	-0.641768	-1.7001	0.0228216	0.031853	1	941	tags=25%, list=8%, signal=27%
GO_REGULATION_OF_LYMPHOCYTE_DIFFERENTIATION	GO_REGULATION_OF_LYMPHOCYTE_DIFFERENTIATION		86	-0.448029	-1.70009	0.00456621	0.03182	1	1025	tags=24%, list=9%, signal=27%
GO_POSITIVE_REGULATION_OF_OXIDOREDUCTASE_ACTIVITY	GO_POSITIVE_REGULATION_OF_OXIDOREDUCTASE_ACTIVITY		28	-0.546854	-1.69978	0.00217865	0.031882	1	779	tags=25%, list=7%, signal=27%
GSE29618_PDC_VS_MDC_DAY7_FLU_VACCINE_UP	GSE29618_PDC_VS_MDC_DAY7_FLU_VACCINE_UP		157	-0.413134	-1.69963	0	0.0319001	1	2346	tags=36%, list=20%, signal=45%
GO_SIDE_OF_MEMBRANE	GO_SIDE_OF_MEMBRANE		255	-0.383896	-1.69942	0	0.0319181	1	2349	tags=35%, list=20%, signal=42%
GSE29618_BCELL_VS_MDC_DAY7_FLU_VACCINE_DN	GSE29618_BCELL_VS_MDC_DAY7_FLU_VACCINE_DN		160	-0.410252	-1.69935	0	0.0319093	1	1413	tags=27%, list=12%, signal=30%
MODULE_241	MODULE_241		48	-0.505062	-1.69927	0.00235294	0.0319004	1	1460	tags=27%, list=13%, signal=31%
GSE17301_ACD3_ACD28_VS_ACD3_ACD28_AND_IFNA2_STIM_CD8_TCELL_DN	GSE17301_ACD3_ACD28_VS_ACD3_ACD28_AND_IFNA2_STIM_CD8_TCELL_DN		176	-0.400742	-1.69894	0	0.0319554	1	1905	tags=32%, list=16%, signal=38%
GO_DIVALENT_INORGANIC_CATION_HOMEOSTASIS	GO_DIVALENT_INORGANIC_CATION_HOMEOSTASIS		160	-0.407152	-1.6986	0	0.0320287	1	1598	tags=23%, list=14%, signal=26%
GSE22886_NAIVE_VS_IGM_MEMORY_BCELL_DN	GSE22886_NAIVE_VS_IGM_MEMORY_BCELL_DN		182	-0.39664	-1.69846	0	0.0320437	1	1839	tags=27%, list=16%, signal=32%
BOQUEST_STEM_CELL_CULTURED_VS_FRESH_UP	BOQUEST_STEM_CELL_CULTURED_VS_FRESH_UP		254	-0.381918	-1.69712	0	0.0324106	1	1034	tags=21%, list=9%, signal=23%
GO_SECOND_MESSENGER_MEDIATED_SIGNALING	GO_SECOND_MESSENGER_MEDIATED_SIGNALING		76	-0.449326	-1.69699	0.00223714	0.0324141	1	1389	tags=25%, list=12%, signal=28%
GO_REGULATION_OF_REACTIVE_OXYGEN_SPECIES_BIOSYNTHETIC_PROCESS	GO_REGULATION_OF_REACTIVE_OXYGEN_SPECIES_BIOSYNTHETIC_PROCESS		40	-0.518497	-1.69693	0	0.0323978	1	2453	tags=45%, list=21%, signal=57%
GSE5589_WT_VS_IL10_KO_LPS_AND_IL10_STIM_MACROPHAGE_45MIN_DN	GSE5589_WT_VS_IL10_KO_LPS_AND_IL10_STIM_MACROPHAGE_45MIN_DN		136	-0.417075	-1.69677	0	0.0324124	1	1883	tags=29%, list=16%, signal=34%
GSE37301_MULTIPOTENT_PROGENITOR_VS_GRAN_MONO_PROGENITOR_DN	GSE37301_MULTIPOTENT_PROGENITOR_VS_GRAN_MONO_PROGENITOR_DN		145	-0.412229	-1.69674	0.00232558	0.0324003	1	1899	tags=32%, list=16%, signal=37%
HELLEBREKERS_SILENCED_DURING_TUMOR_ANGIOGENESIS	HELLEBREKERS_SILENCED_DURING_TUMOR_ANGIOGENESIS		48	-0.495068	-1.69612	0	0.0325413	1	1695	tags=35%, list=15%, signal=41%
PID_ENDOTHELIN_PATHWAY	PID_ENDOTHELIN_PATHWAY		39	-0.515567	-1.69609	0.010395	0.0325137	1	2381	tags=41%, list=21%, signal=51%
PID_HIF1_TFPATHWAY	PID_HIF1_TFPATHWAY		52	-0.489282	-1.69589	0.0113895	0.0325464	1	2079	tags=35%, list=18%, signal=42%
GSE30083_SP3_VS_SP4_THYMOCYTE_DN	GSE30083_SP3_VS_SP4_THYMOCYTE_DN		150	-0.408839	-1.69586	0	0.0325189	1	1783	tags=27%, list=15%, signal=31%
GO_CELLULAR_RESPONSE_TO_IONIZING_RADIATION	GO_CELLULAR_RESPONSE_TO_IONIZING_RADIATION		41	-0.511034	-1.69564	0.00226757	0.0325568	1	459	tags=12%, list=4%, signal=13%
TENEDINI_MEGAKARYOCYTE_MARKERS	TENEDINI_MEGAKARYOCYTE_MARKERS		46	-0.503583	-1.69553	0.00223214	0.032553	1	2242	tags=35%, list=19%, signal=43%
GSE10147_IL3_VS_IL3_AND_CPG_STIM_PDC_UP	GSE10147_IL3_VS_IL3_AND_CPG_STIM_PDC_UP		82	-0.439792	-1.69538	0.00217865	0.0325701	1	708	tags=18%, list=6%, signal=19%
GSE26290_CTRL_VS_AKT_INHIBITOR_TREATED_ANTI_CD3_AND_IL2_STIM_CD8_TCELL_DN	GSE26290_CTRL_VS_AKT_INHIBITOR_TREATED_ANTI_CD3_AND_IL2_STIM_CD8_TCELL_DN		155	-0.404473	-1.69507	0	0.0326485	1	2246	tags=36%, list=19%, signal=44%
ZHANG_TARGETS_OF_EWSR1_FLI1_FUSION	ZHANG_TARGETS_OF_EWSR1_FLI1_FUSION		65	-0.469341	-1.69473	0.00446429	0.032735	1	1921	tags=35%, list=17%, signal=42%
ST_ERK1_ERK2_MAPK_PATHWAY	ST_ERK1_ERK2_MAPK_PATHWAY		31	-0.533773	-1.69421	0.00436681	0.0328659	1	2888	tags=48%, list=25%, signal=64%
GO_RELEASE_OF_CYTOCHROME_C_FROM_MITOCHONDRIA	GO_RELEASE_OF_CYTOCHROME_C_FROM_MITOCHONDRIA		17	-0.642147	-1.69414	0.0091954	0.0328576	1	896	tags=35%, list=8%, signal=38%
ZHAN_MULTIPLE_MYELOMA_DN	ZHAN_MULTIPLE_MYELOMA_DN		25	-0.571302	-1.6938	0.0131868	0.032937	1	1016	tags=32%, list=9%, signal=35%
GSE29618_BCELL_VS_PDC_DAY7_FLU_VACCINE_DN	GSE29618_BCELL_VS_PDC_DAY7_FLU_VACCINE_DN		152	-0.405788	-1.69338	0	0.0330395	1	2052	tags=32%, list=18%, signal=38%
GO_INFLAMMATORY_RESPONSE_TO_ANTIGENIC_STIMULUS	GO_INFLAMMATORY_RESPONSE_TO_ANTIGENIC_STIMULUS		21	-0.577371	-1.6933	0.0193966	0.0330173	1	2420	tags=48%, list=21%, signal=60%
GO_POSITIVE_REGULATION_OF_I_KAPPAB_KINASE_NF_KAPPAB_SIGNALING	GO_POSITIVE_REGULATION_OF_I_KAPPAB_KINASE_NF_KAPPAB_SIGNALING		142	-0.415422	-1.69315	0	0.0330254	1	2301	tags=35%, list=20%, signal=43%
GO_GLOMERULUS_DEVELOPMENT	GO_GLOMERULUS_DEVELOPMENT		20	-0.597206	-1.69214	0.0176991	0.0333386	1	157	tags=15%, list=1%, signal=15%
HELLER_SILENCED_BY_METHYLATION_UP	HELLER_SILENCED_BY_METHYLATION_UP		203	-0.393574	-1.69197	0	0.033363	1	1843	tags=31%, list=16%, signal=36%
POS_HISTAMINE_RESPONSE_NETWORK	POS_HISTAMINE_RESPONSE_NETWORK		20	-0.605093	-1.69148	0.00607288	0.0334935	1	1899	tags=35%, list=16%, signal=42%
KEGG_VIRAL_MYOCARDITIS	KEGG_VIRAL_MYOCARDITIS		52	-0.481852	-1.69024	0.00211416	0.0338739	1	2171	tags=42%, list=19%, signal=52%
GOLDRATH_NAIVE_VS_MEMORY_CD8_TCELL_DN	GOLDRATH_NAIVE_VS_MEMORY_CD8_TCELL_DN		160	-0.404792	-1.6896	0	0.0340253	1	1844	tags=29%, list=16%, signal=34%
PID_AR_NONGENOMIC_PATHWAY	PID_AR_NONGENOMIC_PATHWAY		24	-0.568431	-1.68939	0.00881057	0.0340531	1	2079	tags=46%, list=18%, signal=56%
KEGG_T_CELL_RECEPTOR_SIGNALING_PATHWAY	KEGG_T_CELL_RECEPTOR_SIGNALING_PATHWAY		83	-0.449911	-1.68897	0	0.0341373	1	527	tags=13%, list=5%, signal=14%
GSE23568_CTRL_TRANSDUCED_VS_WT_CD8_TCELL_UP	GSE23568_CTRL_TRANSDUCED_VS_WT_CD8_TCELL_UP		177	-0.400127	-1.68831	0	0.0343059	1	2262	tags=35%, list=20%, signal=43%
MODULE_11	MODULE_11		265	-0.376768	-1.68815	0	0.0343348	1	1684	tags=25%, list=15%, signal=28%
GO_POSITIVE_REGULATION_OF_IMMUNE_RESPONSE	GO_POSITIVE_REGULATION_OF_IMMUNE_RESPONSE		387	-0.363692	-1.68793	0	0.0343607	1	2770	tags=36%, list=24%, signal=46%
CHIBA_RESPONSE_TO_TSA	CHIBA_RESPONSE_TO_TSA		40	-0.511079	-1.6878	0.00678733	0.0343784	1	810	tags=18%, list=7%, signal=19%
GSE6674_CPG_VS_CPG_AND_ANTI_IGM_STIM_BCELL_DN	GSE6674_CPG_VS_CPG_AND_ANTI_IGM_STIM_BCELL_DN		163	-0.40516	-1.68772	0	0.034362	1	1516	tags=22%, list=13%, signal=25%
KRASNOSELSKAYA_ILF3_TARGETS_UP	KRASNOSELSKAYA_ILF3_TARGETS_UP		28	-0.556625	-1.68693	0.00677201	0.0345693	1	1815	tags=54%, list=16%, signal=63%
GSE2197_CPG_DNA_VS_UNTREATED_IN_DC_UP	GSE2197_CPG_DNA_VS_UNTREATED_IN_DC_UP		151	-0.406225	-1.68659	0	0.0346426	1	2174	tags=34%, list=19%, signal=41%
MODULE_301	MODULE_301		95	-0.440699	-1.68626	0	0.0347211	1	1616	tags=28%, list=14%, signal=33%
GSE3920_UNTREATED_VS_IFNG_TREATED_ENDOTHELIAL_CELL_UP	GSE3920_UNTREATED_VS_IFNG_TREATED_ENDOTHELIAL_CELL_UP		100	-0.431879	-1.68586	0.00205339	0.0348188	1	331	tags=12%, list=3%, signal=12%
GO_POSITIVE_REGULATION_OF_CHEMOKINE_PRODUCTION	GO_POSITIVE_REGULATION_OF_CHEMOKINE_PRODUCTION		30	-0.534752	-1.68562	0.012474	0.0348469	1	2529	tags=47%, list=22%, signal=60%
GSE4984_UNTREATED_VS_GALECTIN1_TREATED_DC_UP	GSE4984_UNTREATED_VS_GALECTIN1_TREATED_DC_UP		128	-0.417233	-1.68523	0	0.0349239	1	3001	tags=43%, list=26%, signal=57%
GO_REGULATION_OF_CHEMOKINE_PRODUCTION	GO_REGULATION_OF_CHEMOKINE_PRODUCTION		37	-0.5228	-1.68507	0.00683371	0.0349614	1	2529	tags=43%, list=22%, signal=55%
MODULE_343	MODULE_343		21	-0.598794	-1.68499	0.017094	0.0349635	1	2023	tags=43%, list=17%, signal=52%
GRAESSMANN_RESPONSE_TO_MC_AND_SERUM_DEPRIVATION_UP	GRAESSMANN_RESPONSE_TO_MC_AND_SERUM_DEPRIVATION_UP		130	-0.414164	-1.68492	0	0.0349451	1	1279	tags=28%, list=11%, signal=31%
BERENJENO_ROCK_SIGNALING_NOT_VIA_RHOA_DN	BERENJENO_ROCK_SIGNALING_NOT_VIA_RHOA_DN		33	-0.54179	-1.6847	0.00439561	0.0349757	1	1467	tags=30%, list=13%, signal=35%
GO_IMMUNE_RESPONSE_REGULATING_CELL_SURFACE_RECEPTOR_SIGNALING_PATHWAY	GO_IMMUNE_RESPONSE_REGULATING_CELL_SURFACE_RECEPTOR_SIGNALING_PATHWAY		241	-0.381509	-1.68448	0	0.035017	1	2770	tags=35%, list=24%, signal=45%
MODULE_484	MODULE_484		39	-0.514212	-1.68425	0.00828157	0.0350459	1	3139	tags=54%, list=27%, signal=74%
ODONNELL_TFRC_TARGETS_UP	ODONNELL_TFRC_TARGETS_UP		234	-0.384458	-1.68403	0	0.0350856	1	981	tags=20%, list=8%, signal=21%
LEE_AGING_NEOCORTEX_UP	LEE_AGING_NEOCORTEX_UP		68	-0.461269	-1.68398	0.00628931	0.0350674	1	1049	tags=21%, list=9%, signal=23%
WUNDER_INFLAMMATORY_RESPONSE_AND_CHOLESTEROL_UP	WUNDER_INFLAMMATORY_RESPONSE_AND_CHOLESTEROL_UP		40	-0.51086	-1.68361	0.010846	0.035142	1	1132	tags=35%, list=10%, signal=39%
BASSO_CD40_SIGNALING_DN	BASSO_CD40_SIGNALING_DN		51	-0.489825	-1.68341	0.0021645	0.0351693	1	2205	tags=45%, list=19%, signal=55%
RPS14_DN.V1_UP	RPS14_DN.V1_UP		125	-0.414877	-1.68279	0.00486618	0.0353361	1	1752	tags=26%, list=15%, signal=31%
GSE30083_SP1_VS_SP4_THYMOCYTE_DN	GSE30083_SP1_VS_SP4_THYMOCYTE_DN		141	-0.405143	-1.68224	0.00238663	0.0354748	1	1114	tags=19%, list=10%, signal=21%
KEGG_MAPK_SIGNALING_PATHWAY	KEGG_MAPK_SIGNALING_PATHWAY		177	-0.395593	-1.68222	0	0.0354442	1	1935	tags=25%, list=17%, signal=30%
GSE2706_2H_VS_8H_R848_STIM_DC_UP	GSE2706_2H_VS_8H_R848_STIM_DC_UP		144	-0.408182	-1.68217	0	0.0354244	1	1131	tags=19%, list=10%, signal=21%
PLASARI_TGFB1_SIGNALING_VIA_NFIC_1HR_UP	PLASARI_TGFB1_SIGNALING_VIA_NFIC_1HR_UP		21	-0.603625	-1.68201	0.0108696	0.0354327	1	1912	tags=43%, list=17%, signal=51%
HEN1_01	HEN1_01		109	-0.424435	-1.6819	0	0.0354263	1	944	tags=20%, list=8%, signal=22%
GO_IMMUNE_EFFECTOR_PROCESS	GO_IMMUNE_EFFECTOR_PROCESS		319	-0.367714	-1.68079	0	0.0357523	1	1527	tags=23%, list=13%, signal=25%
GSE42021_CD24HI_VS_CD24INT_TCONV_THYMUS_DN	GSE42021_CD24HI_VS_CD24INT_TCONV_THYMUS_DN		136	-0.406526	-1.68078	0.00231482	0.0357176	1	1685	tags=31%, list=15%, signal=36%
GSE17974_0H_VS_12H_IN_VITRO_ACT_CD4_TCELL_UP	GSE17974_0H_VS_12H_IN_VITRO_ACT_CD4_TCELL_UP		133	-0.411524	-1.68028	0	0.0358243	1	2004	tags=26%, list=17%, signal=31%
GSE24726_WT_VS_E2_2_KO_PDC_DAY4_POST_DELETION_UP	GSE24726_WT_VS_E2_2_KO_PDC_DAY4_POST_DELETION_UP		173	-0.392257	-1.67979	0	0.0359584	1	1984	tags=28%, list=17%, signal=34%
MODULE_137	MODULE_137		251	-0.378889	-1.67972	0	0.0359461	1	1177	tags=20%, list=10%, signal=22%
GO_SKELETAL_MUSCLE_CELL_DIFFERENTIATION	GO_SKELETAL_MUSCLE_CELL_DIFFERENTIATION		27	-0.55481	-1.6794	0.010352	0.0360138	1	2094	tags=44%, list=18%, signal=54%
PHONG_TNF_RESPONSE_NOT_VIA_P38	PHONG_TNF_RESPONSE_NOT_VIA_P38		258	-0.380538	-1.67916	0	0.0360666	1	1787	tags=28%, list=15%, signal=33%
REACTOME_LATENT_INFECTION_OF_HOMO_SAPIENS_WITH_MYCOBACTERIUM_TUBERCULOSIS	REACTOME_LATENT_INFECTION_OF_HOMO_SAPIENS_WITH_MYCOBACTERIUM_TUBERCULOSIS		20	-0.601213	-1.67915	0.0198807	0.0360397	1	1315	tags=35%, list=11%, signal=39%
GSE12366_NAIVE_VS_MEMORY_BCELL_UP	GSE12366_NAIVE_VS_MEMORY_BCELL_UP		110	-0.416327	-1.67904	0	0.0360485	1	1915	tags=32%, list=17%, signal=38%
MAHAJAN_RESPONSE_TO_IL1A_UP	MAHAJAN_RESPONSE_TO_IL1A_UP		51	-0.482664	-1.679	0.00456621	0.0360284	1	968	tags=20%, list=8%, signal=21%
GSE32423_MEMORY_VS_NAIVE_CD8_TCELL_UP	GSE32423_MEMORY_VS_NAIVE_CD8_TCELL_UP		117	-0.424027	-1.67854	0	0.0361522	1	1678	tags=26%, list=14%, signal=31%
BMI1_DN.V1_DN	BMI1_DN.V1_DN		84	-0.43715	-1.67823	0	0.0362338	1	907	tags=20%, list=8%, signal=22%
GSE24142_EARLY_THYMIC_PROGENITOR_VS_DN3_THYMOCYTE_UP	GSE24142_EARLY_THYMIC_PROGENITOR_VS_DN3_THYMOCYTE_UP		161	-0.399851	-1.6778	0	0.0363506	1	2233	tags=36%, list=19%, signal=44%
MODULE_180	MODULE_180		55	-0.473844	-1.67767	0.00453515	0.0363408	1	969	tags=25%, list=8%, signal=28%
FOSTER_TOLERANT_MACROPHAGE_UP	FOSTER_TOLERANT_MACROPHAGE_UP		97	-0.429085	-1.67754	0.00222717	0.036348	1	1896	tags=33%, list=16%, signal=39%
GO_POSITIVE_REGULATION_OF_SECRETION	GO_POSITIVE_REGULATION_OF_SECRETION		203	-0.388731	-1.67736	0	0.0363777	1	2580	tags=34%, list=22%, signal=44%
GO_POSITIVE_REGULATION_OF_PROTEIN_KINASE_B_SIGNALING	GO_POSITIVE_REGULATION_OF_PROTEIN_KINASE_B_SIGNALING		42	-0.509339	-1.67674	0.0198676	0.0365203	1	1993	tags=36%, list=17%, signal=43%
HALLMARK_ESTROGEN_RESPONSE_LATE	HALLMARK_ESTROGEN_RESPONSE_LATE		125	-0.411702	-1.67646	0.00223214	0.0365784	1	1674	tags=30%, list=14%, signal=35%
GSE22501_PERIPHERAL_BLOOD_VS_CORD_BLOOD_TREG_UP	GSE22501_PERIPHERAL_BLOOD_VS_CORD_BLOOD_TREG_UP		104	-0.424124	-1.67639	0	0.0365658	1	1651	tags=24%, list=14%, signal=28%
CHR6P21	CHR6P21		213	-0.386495	-1.67616	0	0.036612	1	1132	tags=17%, list=10%, signal=19%
MODULE_213	MODULE_213		45	-0.50119	-1.67579	0.00439561	0.0367042	1	2917	tags=47%, list=25%, signal=62%
PID_AMB2_NEUTROPHILS_PATHWAY	PID_AMB2_NEUTROPHILS_PATHWAY		30	-0.549556	-1.67564	0.00218341	0.0367123	1	2536	tags=50%, list=22%, signal=64%
MODULE_66	MODULE_66		254	-0.379084	-1.67563	0	0.0366774	1	1177	tags=20%, list=10%, signal=22%
GO_NEGATIVE_REGULATION_OF_ENDOPLASMIC_RETICULUM_STRESS_INDUCED_INTRINSIC_APOPTOTIC_SIGNALING_PATHWAY	GO_NEGATIVE_REGULATION_OF_ENDOPLASMIC_RETICULUM_STRESS_INDUCED_INTRINSIC_APOPTOTIC_SIGNALING_PATHWAY		15	-0.649308	-1.67554	0.0208333	0.0366854	1	376	tags=33%, list=3%, signal=34%
GO_POSITIVE_REGULATION_OF_B_CELL_MEDIATED_IMMUNITY	GO_POSITIVE_REGULATION_OF_B_CELL_MEDIATED_IMMUNITY		18	-0.608954	-1.67473	0.00838574	0.0369065	1	871	tags=33%, list=8%, signal=36%
GO_SODIUM_CHANNEL_REGULATOR_ACTIVITY	GO_SODIUM_CHANNEL_REGULATOR_ACTIVITY		15	-0.638914	-1.67437	0.0151844	0.0369586	1	1525	tags=40%, list=13%, signal=46%
FEVR_CTNNB1_TARGETS_UP	FEVR_CTNNB1_TARGETS_UP		420	-0.358252	-1.67432	0	0.0369496	1	2050	tags=30%, list=18%, signal=35%
GO_REGULATION_OF_CALCIUM_ION_TRANSMEMBRANE_TRANSPORTER_ACTIVITY	GO_REGULATION_OF_CALCIUM_ION_TRANSMEMBRANE_TRANSPORTER_ACTIVITY		38	-0.51382	-1.67377	0.0108225	0.0371058	1	2247	tags=45%, list=19%, signal=55%
GSE12366_GC_VS_NAIVE_BCELL_DN	GSE12366_GC_VS_NAIVE_BCELL_DN		160	-0.401582	-1.67371	0	0.0370927	1	1419	tags=25%, list=12%, signal=28%
GO_PLATELET_ACTIVATION	GO_PLATELET_ACTIVATION		91	-0.430993	-1.67346	0	0.0371383	1	1869	tags=35%, list=16%, signal=42%
GAVIN_PDE3B_TARGETS	GAVIN_PDE3B_TARGETS		18	-0.612597	-1.67296	0.0269151	0.0372549	1	2077	tags=50%, list=18%, signal=61%
GO_RESPONSE_TO_EXTRACELLULAR_STIMULUS	GO_RESPONSE_TO_EXTRACELLULAR_STIMULUS		262	-0.373685	-1.67283	0	0.037256	1	1692	tags=20%, list=15%, signal=23%
GSE25677_MPL_VS_MPL_AND_R848_STIM_BCELL_DN	GSE25677_MPL_VS_MPL_AND_R848_STIM_BCELL_DN		77	-0.443971	-1.67249	0	0.0373414	1	2341	tags=32%, list=20%, signal=40%
GSE42724_NAIVE_VS_B1_BCELL_UP	GSE42724_NAIVE_VS_B1_BCELL_UP		140	-0.402582	-1.67171	0	0.0376054	1	1241	tags=26%, list=11%, signal=29%
GO_RNA_POLYMERASE_II_TRANSCRIPTION_FACTOR_ACTIVITY_SEQUENCE_SPECIFIC_DNA_BINDING	GO_RNA_POLYMERASE_II_TRANSCRIPTION_FACTOR_ACTIVITY_SEQUENCE_SPECIFIC_DNA_BINDING		327	-0.366644	-1.67148	0	0.0376501	1	1995	tags=27%, list=17%, signal=32%
GROSS_HYPOXIA_VIA_ELK3_ONLY_UP	GROSS_HYPOXIA_VIA_ELK3_ONLY_UP		25	-0.565485	-1.6714	0.0147992	0.037647	1	2453	tags=48%, list=21%, signal=61%
GSE40443_INDUCED_VS_TOTAL_TREG_DN	GSE40443_INDUCED_VS_TOTAL_TREG_DN		141	-0.405305	-1.67107	0.00231482	0.0377289	1	1505	tags=28%, list=13%, signal=31%
GO_ION_HOMEOSTASIS	GO_ION_HOMEOSTASIS		290	-0.370593	-1.67012	0	0.0380015	1	1598	tags=22%, list=14%, signal=25%
GSE21063_CTRL_VS_ANTI_IGM_STIM_BCELL_NFATC1_KO_8H_UP	GSE21063_CTRL_VS_ANTI_IGM_STIM_BCELL_NFATC1_KO_8H_UP		143	-0.408352	-1.67009	0.00239808	0.0379762	1	1863	tags=26%, list=16%, signal=30%
GSE3982_MEMORY_CD4_TCELL_VS_BCELL_DN	GSE3982_MEMORY_CD4_TCELL_VS_BCELL_DN		168	-0.398203	-1.66965	0	0.0380976	1	1577	tags=29%, list=14%, signal=33%
GO_RESPONSE_TO_PEPTIDE	GO_RESPONSE_TO_PEPTIDE		252	-0.379731	-1.66928	0	0.0382059	1	1951	tags=25%, list=17%, signal=29%
GSE17974_CTRL_VS_ACT_IL4_AND_ANTI_IL12_6H_CD4_TCELL_UP	GSE17974_CTRL_VS_ACT_IL4_AND_ANTI_IL12_6H_CD4_TCELL_UP		137	-0.406089	-1.66814	0	0.0385986	1	2379	tags=31%, list=21%, signal=39%
STANELLE_E2F1_TARGETS	STANELLE_E2F1_TARGETS		23	-0.58345	-1.6677	0.00666667	0.0387174	1	778	tags=30%, list=7%, signal=33%
GO_ENDODERM_FORMATION	GO_ENDODERM_FORMATION		21	-0.587031	-1.66765	0.0154185	0.0386915	1	1016	tags=29%, list=9%, signal=31%
GO_HISTONE_ACETYLTRANSFERASE_BINDING	GO_HISTONE_ACETYLTRANSFERASE_BINDING		23	-0.56724	-1.66755	0.0313199	0.0386874	1	763	tags=22%, list=7%, signal=23%
GSE37416_12H_VS_48H_F_TULARENSIS_LVS_NEUTROPHIL_UP	GSE37416_12H_VS_48H_F_TULARENSIS_LVS_NEUTROPHIL_UP		163	-0.397958	-1.66719	0	0.0387639	1	2341	tags=32%, list=20%, signal=39%
ZHANG_TLX_TARGETS_UP	ZHANG_TLX_TARGETS_UP		73	-0.454712	-1.66648	0	0.0389768	1	276	tags=15%, list=2%, signal=15%
GO_NEGATIVE_REGULATION_OF_LYMPHOCYTE_MEDIATED_IMMUNITY	GO_NEGATIVE_REGULATION_OF_LYMPHOCYTE_MEDIATED_IMMUNITY		26	-0.553958	-1.6659	0.0107296	0.0391368	1	1025	tags=35%, list=9%, signal=38%
GSE34156_UNTREATED_VS_6H_NOD2_LIGAND_TREATED_MONOCYTE_DN	GSE34156_UNTREATED_VS_6H_NOD2_LIGAND_TREATED_MONOCYTE_DN		134	-0.413314	-1.66569	0	0.0391554	1	1573	tags=28%, list=14%, signal=32%
NOJIMA_SFRP2_TARGETS_UP	NOJIMA_SFRP2_TARGETS_UP		25	-0.571147	-1.66524	0.00423729	0.0392693	1	1973	tags=44%, list=17%, signal=53%
GO_REGULATION_OF_CALCIUM_ION_DEPENDENT_EXOCYTOSIS	GO_REGULATION_OF_CALCIUM_ION_DEPENDENT_EXOCYTOSIS		35	-0.521375	-1.66516	0.00867679	0.0392482	1	852	tags=26%, list=7%, signal=28%
GO_POSITIVE_REGULATION_OF_PRODUCTION_OF_MOLECULAR_MEDIATOR_OF_IMMUNE_RESPONSE	GO_POSITIVE_REGULATION_OF_PRODUCTION_OF_MOLECULAR_MEDIATOR_OF_IMMUNE_RESPONSE		43	-0.481576	-1.665	0.00453515	0.0392653	1	2548	tags=49%, list=22%, signal=62%
ACEVEDO_LIVER_CANCER_DN	ACEVEDO_LIVER_CANCER_DN		370	-0.363025	-1.66497	0	0.0392352	1	1528	tags=18%, list=13%, signal=20%
GSE46606_IRF4MID_VS_WT_CD40L_IL2_IL5_DAY3_STIMULATED_BCELL_UP	GSE46606_IRF4MID_VS_WT_CD40L_IL2_IL5_DAY3_STIMULATED_BCELL_UP		147	-0.401233	-1.66491	0	0.0392154	1	1642	tags=28%, list=14%, signal=32%
MARTENS_BOUND_BY_PML_RARA_FUSION	MARTENS_BOUND_BY_PML_RARA_FUSION		339	-0.367077	-1.6649	0	0.0391842	1	2109	tags=31%, list=18%, signal=36%
GSE43955_TH0_VS_TGFB_IL6_TH17_ACT_CD4_TCELL_4H_DN	GSE43955_TH0_VS_TGFB_IL6_TH17_ACT_CD4_TCELL_4H_DN		146	-0.402496	-1.66403	0	0.0394508	1	1893	tags=28%, list=16%, signal=33%
GSE11961_FOLLICULAR_BCELL_VS_MEMORY_BCELL_DAY7_UP	GSE11961_FOLLICULAR_BCELL_VS_MEMORY_BCELL_DAY7_UP		148	-0.402707	-1.66372	0	0.0395118	1	1329	tags=22%, list=11%, signal=25%
GSE3337_CTRL_VS_16H_IFNG_IN_CD8POS_DC_UP	GSE3337_CTRL_VS_16H_IFNG_IN_CD8POS_DC_UP		143	-0.405263	-1.6637	0	0.0394817	1	2194	tags=27%, list=19%, signal=33%
ATF2_UP.V1_DN	ATF2_UP.V1_DN		101	-0.42322	-1.66366	0	0.0394631	1	1589	tags=27%, list=14%, signal=31%
MODULE_100	MODULE_100		248	-0.379566	-1.66329	0	0.0395442	1	1177	tags=21%, list=10%, signal=22%
GSE33513_TCF7_KO_VS_HET_EARLY_THYMIC_PROGENITOR_UP	GSE33513_TCF7_KO_VS_HET_EARLY_THYMIC_PROGENITOR_UP		105	-0.425408	-1.66276	0	0.0396956	1	850	tags=17%, list=7%, signal=18%
GSE37301_HEMATOPOIETIC_STEM_CELL_VS_GRAN_MONO_PROGENITOR_DN	GSE37301_HEMATOPOIETIC_STEM_CELL_VS_GRAN_MONO_PROGENITOR_DN		143	-0.402171	-1.66258	0.00224719	0.039716	1	1678	tags=28%, list=14%, signal=32%
PRC2_EZH2_UP.V1_UP	PRC2_EZH2_UP.V1_UP		94	-0.435645	-1.66188	0	0.0398997	1	1529	tags=24%, list=13%, signal=28%
ONDER_CDH1_TARGETS_2_DN	ONDER_CDH1_TARGETS_2_DN		239	-0.382048	-1.66145	0	0.0400495	1	2233	tags=34%, list=19%, signal=41%
GSE16266_LPS_VS_HEATSHOCK_AND_LPS_STIM_MEF_UP	GSE16266_LPS_VS_HEATSHOCK_AND_LPS_STIM_MEF_UP		129	-0.404714	-1.66084	0	0.0402127	1	1805	tags=29%, list=16%, signal=34%
GO_INTRINSIC_COMPONENT_OF_ORGANELLE_MEMBRANE	GO_INTRINSIC_COMPONENT_OF_ORGANELLE_MEMBRANE		206	-0.387315	-1.66018	0	0.0404307	1	1763	tags=26%, list=15%, signal=30%
GSE41867_DAY15_EFFECTOR_VS_DAY30_EXHAUSTED_CD8_TCELL_LCMV_CLONE13_UP	GSE41867_DAY15_EFFECTOR_VS_DAY30_EXHAUSTED_CD8_TCELL_LCMV_CLONE13_UP		147	-0.39889	-1.66017	0	0.0403988	1	2561	tags=35%, list=22%, signal=45%
BIOCARTA_IL2RB_PATHWAY	BIOCARTA_IL2RB_PATHWAY		35	-0.52617	-1.66001	0.0115207	0.040426	1	843	tags=20%, list=7%, signal=22%
GSE30083_SP1_VS_SP3_THYMOCYTE_DN	GSE30083_SP1_VS_SP3_THYMOCYTE_DN		118	-0.415388	-1.6589	0	0.0407699	1	1287	tags=23%, list=11%, signal=25%
TAXCREB_01	TAXCREB_01		97	-0.432711	-1.65858	0.00221239	0.0408618	1	2003	tags=32%, list=17%, signal=38%
GSE2770_IL12_AND_TGFB_VS_IL4_TREATED_ACT_CD4_TCELL_6H_DN	GSE2770_IL12_AND_TGFB_VS_IL4_TREATED_ACT_CD4_TCELL_6H_DN		91	-0.429496	-1.6579	0.00230415	0.0410494	1	1610	tags=25%, list=14%, signal=29%
GSE31082_DP_VS_CD4_SP_THYMOCYTE_DN	GSE31082_DP_VS_CD4_SP_THYMOCYTE_DN		165	-0.395713	-1.65786	0	0.0410284	1	1594	tags=25%, list=14%, signal=28%
GENTILE_UV_LOW_DOSE_UP	GENTILE_UV_LOW_DOSE_UP		22	-0.582465	-1.65779	0.00854701	0.0410186	1	584	tags=27%, list=5%, signal=29%
AMIT_EGF_RESPONSE_120_HELA	AMIT_EGF_RESPONSE_120_HELA		53	-0.478472	-1.65745	0.00630252	0.0411234	1	2004	tags=36%, list=17%, signal=43%
LIM_MAMMARY_LUMINAL_MATURE_UP	LIM_MAMMARY_LUMINAL_MATURE_UP		65	-0.455531	-1.65717	0.00217865	0.0411981	1	1643	tags=26%, list=14%, signal=30%
GO_POSITIVE_REGULATION_OF_INTERLEUKIN_1_BETA_PRODUCTION	GO_POSITIVE_REGULATION_OF_INTERLEUKIN_1_BETA_PRODUCTION		21	-0.581029	-1.6571	0.014862	0.0411832	1	2529	tags=52%, list=22%, signal=67%
ROSS_ACUTE_MYELOID_LEUKEMIA_CBF	ROSS_ACUTE_MYELOID_LEUKEMIA_CBF		59	-0.466324	-1.65679	0.00215983	0.0412489	1	2360	tags=36%, list=20%, signal=44%
BROWNE_HCMV_INFECTION_10HR_UP	BROWNE_HCMV_INFECTION_10HR_UP		75	-0.442718	-1.65642	0	0.0413596	1	1289	tags=29%, list=11%, signal=33%
GSE37416_0H_VS_12H_F_TULARENSIS_LVS_NEUTROPHIL_DN	GSE37416_0H_VS_12H_F_TULARENSIS_LVS_NEUTROPHIL_DN		163	-0.392655	-1.65626	0	0.0413905	1	1903	tags=28%, list=16%, signal=33%
PID_IL4_2PATHWAY	PID_IL4_2PATHWAY		46	-0.484433	-1.65588	0.00443459	0.0414845	1	2770	tags=43%, list=24%, signal=57%
HUTTMANN_B_CLL_POOR_SURVIVAL_UP	HUTTMANN_B_CLL_POOR_SURVIVAL_UP		199	-0.381238	-1.65564	0	0.0415202	1	1631	tags=25%, list=14%, signal=28%
GSE40274_FOXP3_VS_FOXP3_AND_GATA1_TRANSDUCED_ACTIVATED_CD4_TCELL_DN	GSE40274_FOXP3_VS_FOXP3_AND_GATA1_TRANSDUCED_ACTIVATED_CD4_TCELL_DN		150	-0.39776	-1.65546	0.00224719	0.0415459	1	1643	tags=23%, list=14%, signal=26%
GO_LEUKOCYTE_DEGRANULATION	GO_LEUKOCYTE_DEGRANULATION		24	-0.568997	-1.65482	0.0120724	0.0417545	1	50	tags=8%, list=0%, signal=8%
MODULE_525	MODULE_525		52	-0.478072	-1.65459	0.00660793	0.0417973	1	2004	tags=38%, list=17%, signal=46%
GSE360_CTRL_VS_L_MAJOR_DC_DN	GSE360_CTRL_VS_L_MAJOR_DC_DN		133	-0.406273	-1.65428	0	0.0418757	1	953	tags=19%, list=8%, signal=20%
GO_REGULATION_OF_OSTEOCLAST_DIFFERENTIATION	GO_REGULATION_OF_OSTEOCLAST_DIFFERENTIATION		42	-0.49781	-1.65417	0.0107066	0.0418763	1	1678	tags=33%, list=14%, signal=39%
SMIRNOV_CIRCULATING_ENDOTHELIOCYTES_IN_CANCER_UP	SMIRNOV_CIRCULATING_ENDOTHELIOCYTES_IN_CANCER_UP		110	-0.419188	-1.65307	0	0.0422677	1	1678	tags=31%, list=14%, signal=36%
GO_CELLULAR_RESPONSE_TO_EXTRACELLULAR_STIMULUS	GO_CELLULAR_RESPONSE_TO_EXTRACELLULAR_STIMULUS		133	-0.404248	-1.65302	0	0.0422507	1	1384	tags=20%, list=12%, signal=23%
GSE17721_CTRL_VS_LPS_1H_BMDC_DN	GSE17721_CTRL_VS_LPS_1H_BMDC_DN		123	-0.408568	-1.65288	0.0043573	0.0422682	1	2058	tags=26%, list=18%, signal=31%
GSE17974_CTRL_VS_ACT_IL4_AND_ANTI_IL12_12H_CD4_TCELL_UP	GSE17974_CTRL_VS_ACT_IL4_AND_ANTI_IL12_12H_CD4_TCELL_UP		136	-0.401738	-1.65276	0	0.0422635	1	2111	tags=31%, list=18%, signal=37%
REACTOME_PLATELET_ACTIVATION_SIGNALING_AND_AGGREGATION	REACTOME_PLATELET_ACTIVATION_SIGNALING_AND_AGGREGATION		130	-0.411945	-1.65259	0	0.0423005	1	2141	tags=32%, list=18%, signal=39%
SHAFFER_IRF4_TARGETS_IN_ACTIVATED_B_LYMPHOCYTE	SHAFFER_IRF4_TARGETS_IN_ACTIVATED_B_LYMPHOCYTE		73	-0.443974	-1.65247	0	0.0423092	1	1917	tags=33%, list=17%, signal=39%
GSE36826_NORMAL_VS_STAPH_AUREUS_INF_SKIN_DN	GSE36826_NORMAL_VS_STAPH_AUREUS_INF_SKIN_DN		165	-0.393066	-1.65246	0	0.0422764	1	1803	tags=23%, list=16%, signal=27%
MCLACHLAN_DENTAL_CARIES_DN	MCLACHLAN_DENTAL_CARIES_DN		38	-0.508717	-1.65239	0.0112108	0.0422607	1	303	tags=13%, list=3%, signal=13%
GSE17721_CTRL_VS_GARDIQUIMOD_4H_BMDC_DN	GSE17721_CTRL_VS_GARDIQUIMOD_4H_BMDC_DN		130	-0.409281	-1.65233	0.0021978	0.0422451	1	2130	tags=32%, list=18%, signal=39%
GSE17721_PAM3CSK4_VS_GADIQUIMOD_12H_BMDC_DN	GSE17721_PAM3CSK4_VS_GADIQUIMOD_12H_BMDC_DN		144	-0.397554	-1.65226	0	0.0422294	1	1946	tags=28%, list=17%, signal=34%
GSE13522_WT_VS_IFNAR_KO_SKING_T_CRUZI_Y_STRAIN_INF_UP	GSE13522_WT_VS_IFNAR_KO_SKING_T_CRUZI_Y_STRAIN_INF_UP		141	-0.401813	-1.65155	0	0.0424703	1	1962	tags=32%, list=17%, signal=38%
GSE23114_PERITONEAL_CAVITY_B1A_BCELL_VS_SPLEEN_BCELL_IN_SLE2C1_MOUSE_UP	GSE23114_PERITONEAL_CAVITY_B1A_BCELL_VS_SPLEEN_BCELL_IN_SLE2C1_MOUSE_UP		133	-0.404137	-1.65085	0	0.0426937	1	1934	tags=27%, list=17%, signal=32%
CGGAARNGGCNG_UNKNOWN	CGGAARNGGCNG_UNKNOWN		45	-0.495343	-1.6505	0.0138249	0.04278	1	1240	tags=22%, list=11%, signal=25%
GSE23321_CENTRAL_MEMORY_VS_NAIVE_CD8_TCELL_UP	GSE23321_CENTRAL_MEMORY_VS_NAIVE_CD8_TCELL_UP		144	-0.400009	-1.65025	0.00246914	0.0428321	1	1391	tags=24%, list=12%, signal=27%
ATF3_Q6	ATF3_Q6		149	-0.400658	-1.64989	0	0.0429279	1	1899	tags=28%, list=16%, signal=33%
NUTT_GBM_VS_AO_GLIOMA_UP	NUTT_GBM_VS_AO_GLIOMA_UP		38	-0.500514	-1.64988	0.00666667	0.0428972	1	1587	tags=34%, list=14%, signal=40%
PID_IL6_7_PATHWAY	PID_IL6_7_PATHWAY		42	-0.49597	-1.64986	0.0100604	0.0428641	1	2538	tags=43%, list=22%, signal=55%
VART_KSHV_INFECTION_ANGIOGENIC_MARKERS_DN	VART_KSHV_INFECTION_ANGIOGENIC_MARKERS_DN		50	-0.485878	-1.64852	0.00441501	0.0433016	1	2726	tags=44%, list=24%, signal=57%
GO_POSITIVE_REGULATION_OF_STAT_CASCADE	GO_POSITIVE_REGULATION_OF_STAT_CASCADE		48	-0.48837	-1.6485	0.00448431	0.0432694	1	2453	tags=46%, list=21%, signal=58%
GSE36476_CTRL_VS_TSST_ACT_72H_MEMORY_CD4_TCELL_OLD_UP	GSE36476_CTRL_VS_TSST_ACT_72H_MEMORY_CD4_TCELL_OLD_UP		134	-0.404698	-1.64813	0.00223714	0.0433971	1	2004	tags=33%, list=17%, signal=39%
GHANDHI_BYSTANDER_IRRADIATION_UP	GHANDHI_BYSTANDER_IRRADIATION_UP		49	-0.48403	-1.64802	0.00225225	0.0434049	1	1892	tags=41%, list=16%, signal=49%
FERRARI_RESPONSE_TO_FENRETINIDE_UP	FERRARI_RESPONSE_TO_FENRETINIDE_UP		15	-0.63028	-1.64689	0.0188679	0.04378	1	204	tags=27%, list=2%, signal=27%
GO_MICROVILLUS_ORGANIZATION	GO_MICROVILLUS_ORGANIZATION		15	-0.622078	-1.64628	0.0184805	0.0439892	1	1739	tags=33%, list=15%, signal=39%
GO_REGULATION_OF_MAPK_CASCADE	GO_REGULATION_OF_MAPK_CASCADE		404	-0.356372	-1.64531	0	0.0443285	1	1212	tags=18%, list=10%, signal=20%
PID_IL12_STAT4_PATHWAY	PID_IL12_STAT4_PATHWAY		25	-0.556755	-1.64449	0.0172786	0.0446091	1	2077	tags=44%, list=18%, signal=54%
GO_NEGATIVE_REGULATION_OF_SEQUENCE_SPECIFIC_DNA_BINDING_TRANSCRIPTION_FACTOR_ACTIVITY	GO_NEGATIVE_REGULATION_OF_SEQUENCE_SPECIFIC_DNA_BINDING_TRANSCRIPTION_FACTOR_ACTIVITY		87	-0.436192	-1.64448	0.00242719	0.0445736	1	1845	tags=33%, list=16%, signal=39%
GSE37534_GW1929_VS_PIOGLITAZONE_TREATED_CD4_TCELL_PPARG1_FOXP3_TRANSDUCED_UP	GSE37534_GW1929_VS_PIOGLITAZONE_TREATED_CD4_TCELL_PPARG1_FOXP3_TRANSDUCED_UP		124	-0.40722	-1.64428	0	0.0446151	1	1422	tags=26%, list=12%, signal=29%
GSE17721_LPS_VS_CPG_12H_BMDC_DN	GSE17721_LPS_VS_CPG_12H_BMDC_DN		136	-0.402167	-1.64425	0.00228311	0.0445856	1	1220	tags=23%, list=11%, signal=25%
GO_POSITIVE_REGULATION_OF_EPITHELIAL_CELL_MIGRATION	GO_POSITIVE_REGULATION_OF_EPITHELIAL_CELL_MIGRATION		62	-0.453959	-1.64423	0.00858369	0.0445538	1	2130	tags=31%, list=18%, signal=37%
SERVITJA_ISLET_HNF1A_TARGETS_UP	SERVITJA_ISLET_HNF1A_TARGETS_UP		73	-0.445709	-1.64416	0.00476191	0.0445497	1	1440	tags=29%, list=12%, signal=33%
GO_SPHINGOLIPID_BIOSYNTHETIC_PROCESS	GO_SPHINGOLIPID_BIOSYNTHETIC_PROCESS		44	-0.480523	-1.64414	0.00660793	0.0445215	1	1278	tags=32%, list=11%, signal=36%
GO_REGULATION_OF_PEPTIDYL_TYROSINE_PHOSPHORYLATION	GO_REGULATION_OF_PEPTIDYL_TYROSINE_PHOSPHORYLATION		121	-0.407386	-1.64399	0	0.0445318	1	2453	tags=36%, list=21%, signal=46%
AACATTC_MIR4093P	AACATTC_MIR4093P		104	-0.415146	-1.64347	0	0.044682	1	2318	tags=37%, list=20%, signal=45%
HOFFMANN_LARGE_TO_SMALL_PRE_BII_LYMPHOCYTE_DN	HOFFMANN_LARGE_TO_SMALL_PRE_BII_LYMPHOCYTE_DN		45	-0.489495	-1.64314	0.00712589	0.0447745	1	2233	tags=42%, list=19%, signal=52%
GO_POSITIVE_REGULATION_OF_RECEPTOR_MEDIATED_ENDOCYTOSIS	GO_POSITIVE_REGULATION_OF_RECEPTOR_MEDIATED_ENDOCYTOSIS		25	-0.552066	-1.64313	0.0156951	0.0447391	1	1150	tags=28%, list=10%, signal=31%
GO_CELL_SURFACE	GO_CELL_SURFACE		362	-0.356383	-1.64306	0	0.0447312	1	1156	tags=20%, list=10%, signal=21%
GO_PEPTIDE_TRANSPORT	GO_PEPTIDE_TRANSPORT		35	-0.520338	-1.64272	0.0110865	0.0448234	1	1321	tags=34%, list=11%, signal=39%
GSE9650_EFFECTOR_VS_EXHAUSTED_CD8_TCELL_DN	GSE9650_EFFECTOR_VS_EXHAUSTED_CD8_TCELL_DN		126	-0.400706	-1.64262	0	0.0448226	1	1216	tags=20%, list=11%, signal=22%
GSE34156_TLR1_TLR2_LIGAND_VS_NOD2_AND_TLR1_TLR2_LIGAND_24H_TREATED_MONOCYTE_UP	GSE34156_TLR1_TLR2_LIGAND_VS_NOD2_AND_TLR1_TLR2_LIGAND_24H_TREATED_MONOCYTE_UP		136	-0.405146	-1.64258	0	0.0447956	1	1708	tags=30%, list=15%, signal=35%
DUTERTRE_ESTRADIOL_RESPONSE_24HR_DN	DUTERTRE_ESTRADIOL_RESPONSE_24HR_DN		351	-0.355042	-1.64257	0	0.0447627	1	1970	tags=27%, list=17%, signal=32%
GSE3920_UNTREATED_VS_IFNA_TREATED_FIBROBLAST_UP	GSE3920_UNTREATED_VS_IFNA_TREATED_FIBROBLAST_UP		136	-0.401311	-1.64249	0	0.0447501	1	1853	tags=26%, list=16%, signal=31%
GNF2_ITGB2	GNF2_ITGB2		50	-0.481993	-1.64234	0.0174292	0.0447647	1	2187	tags=34%, list=19%, signal=42%
GO_NEPHRON_DEVELOPMENT	GO_NEPHRON_DEVELOPMENT		47	-0.481957	-1.64105	0.0045045	0.0452736	1	1993	tags=32%, list=17%, signal=38%
GO_REGULATION_OF_PEPTIDYL_THREONINE_PHOSPHORYLATION	GO_REGULATION_OF_PEPTIDYL_THREONINE_PHOSPHORYLATION		23	-0.557545	-1.64029	0.0170213	0.0455284	1	1373	tags=30%, list=12%, signal=34%
GO_RESPONSE_TO_MOLECULE_OF_BACTERIAL_ORIGIN	GO_RESPONSE_TO_MOLECULE_OF_BACTERIAL_ORIGIN		204	-0.378408	-1.64006	0	0.0455946	1	1242	tags=21%, list=11%, signal=23%
PASQUALUCCI_LYMPHOMA_BY_GC_STAGE_UP	PASQUALUCCI_LYMPHOMA_BY_GC_STAGE_UP		202	-0.374821	-1.63926	0	0.0458785	1	2095	tags=30%, list=18%, signal=36%
GO_REGULATION_OF_SEQUESTERING_OF_CALCIUM_ION	GO_REGULATION_OF_SEQUESTERING_OF_CALCIUM_ION		62	-0.459406	-1.63924	0.00881057	0.0458449	1	2255	tags=34%, list=19%, signal=42%
GO_CONNECTIVE_TISSUE_DEVELOPMENT	GO_CONNECTIVE_TISSUE_DEVELOPMENT		91	-0.426493	-1.6392	0	0.0458196	1	2031	tags=27%, list=18%, signal=33%
MODULE_208	MODULE_208		83	-0.430073	-1.63914	0	0.0458025	1	1437	tags=29%, list=12%, signal=33%
GSE46606_IRF4HIGH_VS_WT_CD40L_IL2_IL5_DAY3_STIMULATED_BCELL_DN	GSE46606_IRF4HIGH_VS_WT_CD40L_IL2_IL5_DAY3_STIMULATED_BCELL_DN		118	-0.405267	-1.63895	0.00234742	0.045848	1	1840	tags=30%, list=16%, signal=35%
TARTE_PLASMA_CELL_VS_B_LYMPHOCYTE_DN	TARTE_PLASMA_CELL_VS_B_LYMPHOCYTE_DN		37	-0.505015	-1.63876	0.0131579	0.045871	1	2233	tags=41%, list=19%, signal=50%
HALLMARK_UV_RESPONSE_DN	HALLMARK_UV_RESPONSE_DN		99	-0.414444	-1.6387	0	0.0458563	1	1462	tags=24%, list=13%, signal=28%
REACTOME_PEPTIDE_LIGAND_BINDING_RECEPTORS	REACTOME_PEPTIDE_LIGAND_BINDING_RECEPTORS		54	-0.478094	-1.6386	0.00652174	0.0458618	1	1212	tags=19%, list=10%, signal=21%
LEONARD_HYPOXIA	LEONARD_HYPOXIA		41	-0.491828	-1.6384	0.00228311	0.0458965	1	2120	tags=32%, list=18%, signal=39%
GSE2128_CTRL_VS_MIMETOPE_NEGATIVE_SELECTION_DP_THYMOCYTE_NOD_UP	GSE2128_CTRL_VS_MIMETOPE_NEGATIVE_SELECTION_DP_THYMOCYTE_NOD_UP		144	-0.396062	-1.63827	0	0.0459112	1	1613	tags=26%, list=14%, signal=30%
KYNG_DNA_DAMAGE_UP	KYNG_DNA_DAMAGE_UP		154	-0.393903	-1.63809	0	0.0459355	1	1050	tags=21%, list=9%, signal=23%
GO_MHC_PROTEIN_BINDING	GO_MHC_PROTEIN_BINDING		22	-0.578797	-1.63771	0.0247748	0.0460358	1	1671	tags=41%, list=14%, signal=48%
GSE6674_UNSTIM_VS_CPG_STIM_BCELL_UP	GSE6674_UNSTIM_VS_CPG_STIM_BCELL_UP		98	-0.419252	-1.63749	0.00445434	0.0460832	1	1399	tags=27%, list=12%, signal=30%
GO_CELLULAR_HOMEOSTASIS	GO_CELLULAR_HOMEOSTASIS		353	-0.356563	-1.63718	0	0.0461612	1	1598	tags=22%, list=14%, signal=25%
GO_CELLULAR_RESPONSE_TO_GAMMA_RADIATION	GO_CELLULAR_RESPONSE_TO_GAMMA_RADIATION		15	-0.629615	-1.63698	0.0274841	0.0461874	1	39	tags=13%, list=0%, signal=13%
GSE22886_NAIVE_CD8_TCELL_VS_MONOCYTE_DN	GSE22886_NAIVE_CD8_TCELL_VS_MONOCYTE_DN		168	-0.386037	-1.63676	0	0.0462451	1	2727	tags=38%, list=24%, signal=49%
SRF_Q5_01	SRF_Q5_01		125	-0.407531	-1.63657	0.002331	0.0462946	1	1745	tags=22%, list=15%, signal=25%
MARSON_FOXP3_CORE_DIRECT_TARGETS	MARSON_FOXP3_CORE_DIRECT_TARGETS		15	-0.628183	-1.63621	0.0281385	0.0464209	1	3099	tags=80%, list=27%, signal=109%
GSE35825_UNTREATED_VS_IFNA_STIM_MACROPHAGE_DN	GSE35825_UNTREATED_VS_IFNA_STIM_MACROPHAGE_DN		122	-0.405831	-1.63612	0.00480769	0.0464259	1	1423	tags=27%, list=12%, signal=31%
GO_NEGATIVE_REGULATION_OF_INTERFERON_GAMMA_PRODUCTION	GO_NEGATIVE_REGULATION_OF_INTERFERON_GAMMA_PRODUCTION		22	-0.571032	-1.63603	0.0131004	0.0464225	1	2414	tags=59%, list=21%, signal=75%
GSE17974_CTRL_VS_ACT_IL4_AND_ANTI_IL12_24H_CD4_TCELL_UP	GSE17974_CTRL_VS_ACT_IL4_AND_ANTI_IL12_24H_CD4_TCELL_UP		140	-0.399427	-1.63587	0.002331	0.0464518	1	2111	tags=32%, list=18%, signal=39%
ULE_SPLICING_VIA_NOVA2	ULE_SPLICING_VIA_NOVA2		30	-0.52695	-1.6358	0.00867679	0.046431	1	1253	tags=33%, list=11%, signal=37%
GSE16385_MONOCYTE_VS_12H_IFNG_TNF_TREATED_MACROPHAGE_UP	GSE16385_MONOCYTE_VS_12H_IFNG_TNF_TREATED_MACROPHAGE_UP		154	-0.391147	-1.63563	0	0.0464429	1	528	tags=14%, list=5%, signal=15%
GSE7460_TCONV_VS_TREG_THYMUS_UP	GSE7460_TCONV_VS_TREG_THYMUS_UP		133	-0.403841	-1.6347	0.00452489	0.0467983	1	776	tags=14%, list=7%, signal=15%
GO_POSITIVE_REGULATION_OF_INTERFERON_GAMMA_PRODUCTION	GO_POSITIVE_REGULATION_OF_INTERFERON_GAMMA_PRODUCTION		46	-0.483439	-1.63446	0.0183908	0.0468468	1	909	tags=26%, list=8%, signal=28%
GSE17974_CTRL_VS_ACT_IL4_AND_ANTI_IL12_1H_CD4_TCELL_DN	GSE17974_CTRL_VS_ACT_IL4_AND_ANTI_IL12_1H_CD4_TCELL_DN		151	-0.394856	-1.63428	0	0.0468697	1	1424	tags=21%, list=12%, signal=24%
ICSBP_Q6	ICSBP_Q6		153	-0.396422	-1.63418	0.00225225	0.0468625	1	1325	tags=25%, list=11%, signal=28%
GSE29617_CTRL_VS_DAY3_TIV_FLU_VACCINE_PBMC_2008_UP	GSE29617_CTRL_VS_DAY3_TIV_FLU_VACCINE_PBMC_2008_UP		133	-0.39459	-1.63405	0	0.0468728	1	1991	tags=29%, list=17%, signal=35%
GO_REGULATION_OF_ANOIKIS	GO_REGULATION_OF_ANOIKIS		19	-0.604333	-1.63391	0.0189474	0.0468715	1	1053	tags=37%, list=9%, signal=40%
LABBE_TARGETS_OF_TGFB1_AND_WNT3A_UP	LABBE_TARGETS_OF_TGFB1_AND_WNT3A_UP		57	-0.45431	-1.63346	0.00218341	0.0470286	1	1413	tags=32%, list=12%, signal=36%
GO_REGULATION_OF_INTERLEUKIN_10_PRODUCTION	GO_REGULATION_OF_INTERLEUKIN_10_PRODUCTION		36	-0.510702	-1.63343	0.00835073	0.0469995	1	1271	tags=36%, list=11%, signal=40%
KAECH_NAIVE_VS_MEMORY_CD8_TCELL_DN	KAECH_NAIVE_VS_MEMORY_CD8_TCELL_DN		162	-0.388493	-1.63281	0	0.047225	1	2313	tags=33%, list=20%, signal=40%
WENG_POR_TARGETS_GLOBAL_DN	WENG_POR_TARGETS_GLOBAL_DN		19	-0.600456	-1.6327	0.0185615	0.047228	1	771	tags=21%, list=7%, signal=23%
GSE27241_WT_VS_RORGT_KO_TH17_POLARIZED_CD4_TCELL_TREATED_WITH_DIGOXIN_DN	GSE27241_WT_VS_RORGT_KO_TH17_POLARIZED_CD4_TCELL_TREATED_WITH_DIGOXIN_DN		125	-0.409741	-1.63226	0.00225225	0.0473634	1	2241	tags=30%, list=19%, signal=36%
MORI_IMMATURE_B_LYMPHOCYTE_UP	MORI_IMMATURE_B_LYMPHOCYTE_UP		45	-0.485109	-1.63216	0.010989	0.0473674	1	2107	tags=40%, list=18%, signal=49%
GO_ENDOPLASMIC_RETICULUM_TO_CYTOSOL_TRANSPORT	GO_ENDOPLASMIC_RETICULUM_TO_CYTOSOL_TRANSPORT		17	-0.598879	-1.63198	0.0260521	0.0473911	1	371	tags=24%, list=3%, signal=24%
GSE1925_CTRL_VS_24H_IFNG_STIM_MACROPHAGE_UP	GSE1925_CTRL_VS_24H_IFNG_STIM_MACROPHAGE_UP		150	-0.396867	-1.63187	0	0.0474043	1	1397	tags=23%, list=12%, signal=26%
GSE22886_CD8_TCELL_VS_BCELL_NAIVE_DN	GSE22886_CD8_TCELL_VS_BCELL_NAIVE_DN		128	-0.393243	-1.63179	0	0.047398	1	2492	tags=34%, list=22%, signal=42%
BIOCARTA_GPCR_PATHWAY	BIOCARTA_GPCR_PATHWAY		27	-0.52345	-1.63131	0.00845666	0.0475833	1	498	tags=15%, list=4%, signal=15%
PID_IL12_2PATHWAY	PID_IL12_2PATHWAY		47	-0.480449	-1.63109	0.0142857	0.0476181	1	889	tags=15%, list=8%, signal=16%
MODULE_139	MODULE_139		34	-0.507522	-1.63101	0.0133929	0.0476105	1	969	tags=29%, list=8%, signal=32%
GSE40277_GATA1_AND_SATB1_TRANSDUCED_VS_CTRL_CD4_TCELL_DN	GSE40277_GATA1_AND_SATB1_TRANSDUCED_VS_CTRL_CD4_TCELL_DN		141	-0.393102	-1.63095	0	0.0475913	1	2713	tags=33%, list=23%, signal=42%
HALMOS_CEBPA_TARGETS_DN	HALMOS_CEBPA_TARGETS_DN		24	-0.556881	-1.63038	0.0148305	0.0477835	1	1226	tags=29%, list=11%, signal=33%
TURASHVILI_BREAST_DUCTAL_CARCINOMA_VS_LOBULAR_NORMAL_DN	TURASHVILI_BREAST_DUCTAL_CARCINOMA_VS_LOBULAR_NORMAL_DN		28	-0.536579	-1.63029	0.00675676	0.0477837	1	1192	tags=29%, list=10%, signal=32%
GSE3982_MAST_CELL_VS_NEUTROPHIL_DN	GSE3982_MAST_CELL_VS_NEUTROPHIL_DN		140	-0.396942	-1.63019	0	0.0477942	1	1835	tags=28%, list=16%, signal=33%
RIGGI_EWING_SARCOMA_PROGENITOR_UP	RIGGI_EWING_SARCOMA_PROGENITOR_UP		214	-0.369027	-1.62911	0	0.0481731	1	1978	tags=31%, list=17%, signal=37%
MARTENS_TRETINOIN_RESPONSE_UP	MARTENS_TRETINOIN_RESPONSE_UP		233	-0.374648	-1.62908	0	0.0481524	1	1950	tags=26%, list=17%, signal=30%
GO_METANEPHROS_DEVELOPMENT	GO_METANEPHROS_DEVELOPMENT		28	-0.534783	-1.62903	0.0107527	0.0481295	1	1226	tags=32%, list=11%, signal=36%
LEE_DOUBLE_POLAR_THYMOCYTE	LEE_DOUBLE_POLAR_THYMOCYTE		16	-0.606303	-1.6287	0.0229885	0.0482306	1	1778	tags=44%, list=15%, signal=52%
CGTSACG_PAX3_B	CGTSACG_PAX3_B		112	-0.408671	-1.62857	0	0.0482428	1	862	tags=13%, list=7%, signal=14%
GSE24574_NAIVE_VS_TCONV_CD4_TCELL_UP	GSE24574_NAIVE_VS_TCONV_CD4_TCELL_UP		127	-0.403253	-1.62841	0	0.0482666	1	2133	tags=36%, list=18%, signal=44%
IL21_UP.V1_UP	IL21_UP.V1_UP		72	-0.448433	-1.62832	0.00229885	0.0482619	1	2448	tags=36%, list=21%, signal=46%
KEGG_ERBB_SIGNALING_PATHWAY	KEGG_ERBB_SIGNALING_PATHWAY		63	-0.44426	-1.62802	0.00232558	0.0483773	1	2389	tags=32%, list=21%, signal=40%
PID_IL27_PATHWAY	PID_IL27_PATHWAY		21	-0.587109	-1.62752	0.0107066	0.0485832	1	2538	tags=57%, list=22%, signal=73%
MARSON_FOXP3_TARGETS_UP	MARSON_FOXP3_TARGETS_UP		53	-0.469336	-1.62702	0.0148305	0.048732	1	1514	tags=32%, list=13%, signal=37%
GSE17721_LPS_VS_CPG_6H_BMDC_UP	GSE17721_LPS_VS_CPG_6H_BMDC_UP		140	-0.398088	-1.62697	0	0.0487111	1	1012	tags=17%, list=9%, signal=19%
GO_REGULATION_OF_CELLULAR_COMPONENT_MOVEMENT	GO_REGULATION_OF_CELLULAR_COMPONENT_MOVEMENT		420	-0.347839	-1.62675	0	0.0487851	1	2389	tags=29%, list=21%, signal=35%
GO_REGULATION_OF_METAL_ION_TRANSPORT	GO_REGULATION_OF_METAL_ION_TRANSPORT		157	-0.384148	-1.62669	0	0.0487631	1	1691	tags=24%, list=15%, signal=28%
GSE37301_HEMATOPOIETIC_STEM_CELL_VS_RAG2_KO_NK_CELL_DN	GSE37301_HEMATOPOIETIC_STEM_CELL_VS_RAG2_KO_NK_CELL_DN		141	-0.397945	-1.62658	0.00236407	0.048768	1	1691	tags=26%, list=15%, signal=30%
GSE14000_4H_VS_16H_LPS_DC_UP	GSE14000_4H_VS_16H_LPS_DC_UP		153	-0.390432	-1.62626	0	0.0488588	1	1589	tags=24%, list=14%, signal=27%
AZARE_NEOPLASTIC_TRANSFORMATION_BY_STAT3_UP	AZARE_NEOPLASTIC_TRANSFORMATION_BY_STAT3_UP		76	-0.438631	-1.62602	0.00458716	0.0489223	1	2002	tags=28%, list=17%, signal=33%
GSE29164_UNTREATED_VS_CD8_TCELL_TREATED_MELANOMA_DAY7_UP	GSE29164_UNTREATED_VS_CD8_TCELL_TREATED_MELANOMA_DAY7_UP		164	-0.390055	-1.62592	0	0.0489238	1	1558	tags=24%, list=13%, signal=28%
GSE22886_NAIVE_BCELL_VS_MONOCYTE_DN	GSE22886_NAIVE_BCELL_VS_MONOCYTE_DN		176	-0.385227	-1.62517	0	0.0491892	1	1695	tags=27%, list=15%, signal=31%
GO_CELLULAR_RESPONSE_TO_DRUG	GO_CELLULAR_RESPONSE_TO_DRUG		42	-0.487672	-1.62516	0.0110132	0.0491501	1	1370	tags=24%, list=12%, signal=27%
GSE40277_EOS_AND_LEF1_TRANSDUCED_VS_CTRL_CD4_TCELL_UP	GSE40277_EOS_AND_LEF1_TRANSDUCED_VS_CTRL_CD4_TCELL_UP		159	-0.388269	-1.62448	0	0.0493812	1	1863	tags=30%, list=16%, signal=35%
GO_RESPONSE_TO_CALCIUM_ION	GO_RESPONSE_TO_CALCIUM_ION		70	-0.440105	-1.62445	0	0.0493543	1	1674	tags=31%, list=14%, signal=37%
GSE15330_HSC_VS_MEGAKARYOCYTE_ERYTHROID_PROGENITOR_IKAROS_KO_UP	GSE15330_HSC_VS_MEGAKARYOCYTE_ERYTHROID_PROGENITOR_IKAROS_KO_UP		168	-0.391896	-1.62351	0	0.0497085	1	1536	tags=23%, list=13%, signal=26%
GSE29949_MICROGLIA_VS_DC_BRAIN_DN	GSE29949_MICROGLIA_VS_DC_BRAIN_DN		95	-0.422825	-1.6235	0.00219298	0.0496691	1	1852	tags=26%, list=16%, signal=31%
GSE30971_WBP7_HET_VS_KO_MACROPHAGE_DN	GSE30971_WBP7_HET_VS_KO_MACROPHAGE_DN		139	-0.392895	-1.62327	0	0.0497315	1	2311	tags=35%, list=20%, signal=44%
DAZARD_UV_RESPONSE_CLUSTER_G2	DAZARD_UV_RESPONSE_CLUSTER_G2		22	-0.559396	-1.62304	0.018595	0.0497961	1	1332	tags=45%, list=12%, signal=51%
GO_EPIDERMAL_GROWTH_FACTOR_RECEPTOR_BINDING	GO_EPIDERMAL_GROWTH_FACTOR_RECEPTOR_BINDING		18	-0.583983	-1.62273	0.0214133	0.0498805	1	2813	tags=67%, list=24%, signal=88%
GO_ENDOCYTIC_VESICLE_MEMBRANE	GO_ENDOCYTIC_VESICLE_MEMBRANE		96	-0.418422	-1.62268	0	0.0498611	1	2264	tags=36%, list=20%, signal=45%
GSE3982_MAC_VS_TH2_UP	GSE3982_MAC_VS_TH2_UP		142	-0.392529	-1.62257	0	0.0498763	1	1419	tags=27%, list=12%, signal=30%
KINSEY_TARGETS_OF_EWSR1_FLII_FUSION_DN	KINSEY_TARGETS_OF_EWSR1_FLII_FUSION_DN		203	-0.374953	-1.6222	0	0.0500206	1	1516	tags=22%, list=13%, signal=25%
GSE18893_TCONV_VS_TREG_2H_CULTURE_DN	GSE18893_TCONV_VS_TREG_2H_CULTURE_DN		162	-0.391242	-1.62194	0	0.0500991	1	1234	tags=23%, list=11%, signal=26%
HELLER_SILENCED_BY_METHYLATION_DN	HELLER_SILENCED_BY_METHYLATION_DN		82	-0.42967	-1.6217	0.00627615	0.0501641	1	1372	tags=26%, list=12%, signal=29%
GO_REGULATION_OF_ION_TRANSPORT	GO_REGULATION_OF_ION_TRANSPORT		261	-0.36369	-1.62152	0	0.0502112	1	2027	tags=26%, list=18%, signal=31%
GO_REGULATION_OF_MEMBRANE_DEPOLARIZATION	GO_REGULATION_OF_MEMBRANE_DEPOLARIZATION		21	-0.577988	-1.62141	0.0211765	0.0502262	1	1053	tags=29%, list=9%, signal=31%
GSE19923_E2A_KO_VS_E2A_AND_HEB_KO_DP_THYMOCYTE_DN	GSE19923_E2A_KO_VS_E2A_AND_HEB_KO_DP_THYMOCYTE_DN		157	-0.389468	-1.62132	0.00234192	0.0502222	1	1777	tags=30%, list=15%, signal=35%
GO_MULTI_MULTICELLULAR_ORGANISM_PROCESS	GO_MULTI_MULTICELLULAR_ORGANISM_PROCESS		116	-0.406366	-1.62107	0	0.050286	1	1121	tags=21%, list=10%, signal=23%
GO_FATTY_ACID_DERIVATIVE_BIOSYNTHETIC_PROCESS	GO_FATTY_ACID_DERIVATIVE_BIOSYNTHETIC_PROCESS		20	-0.578067	-1.62029	0.0147679	0.0506241	1	2461	tags=60%, list=21%, signal=76%
GSE46606_DAY1_VS_DAY3_CD40L_IL2_IL5_STIMULATED_IRF4MID_BCELL_UP	GSE46606_DAY1_VS_DAY3_CD40L_IL2_IL5_STIMULATED_IRF4MID_BCELL_UP		105	-0.404977	-1.61981	0.00683371	0.0507747	1	2280	tags=34%, list=20%, signal=42%
HALLMARK_KRAS_SIGNALING_DN	HALLMARK_KRAS_SIGNALING_DN		61	-0.463956	-1.61948	0.00642398	0.050872	1	1272	tags=26%, list=11%, signal=29%
GSE7218_UNSTIM_VS_ANTIGEN_STIM_THROUGH_IGM_BCELL_UP	GSE7218_UNSTIM_VS_ANTIGEN_STIM_THROUGH_IGM_BCELL_UP		59	-0.453083	-1.61926	0.00233645	0.0509262	1	960	tags=17%, list=8%, signal=18%
GO_KINASE_INHIBITOR_ACTIVITY	GO_KINASE_INHIBITOR_ACTIVITY		52	-0.465773	-1.61902	0.00226757	0.0509814	1	957	tags=23%, list=8%, signal=25%
SUH_COEXPRESSED_WITH_ID1_AND_ID2_UP	SUH_COEXPRESSED_WITH_ID1_AND_ID2_UP		16	-0.605681	-1.61896	0.0207039	0.050979	1	1502	tags=31%, list=13%, signal=36%
GO_RESPONSE_TO_PURINE_CONTAINING_COMPOUND	GO_RESPONSE_TO_PURINE_CONTAINING_COMPOUND		86	-0.416022	-1.61841	0.00229358	0.0511773	1	2482	tags=33%, list=21%, signal=41%
DASU_IL6_SIGNALING_SCAR_UP	DASU_IL6_SIGNALING_SCAR_UP		21	-0.570302	-1.61793	0.0152174	0.0513502	1	179	tags=10%, list=2%, signal=10%
GSE11057_PBMC_VS_MEM_CD4_TCELL_UP	GSE11057_PBMC_VS_MEM_CD4_TCELL_UP		106	-0.414501	-1.61783	0.0021978	0.0513442	1	1541	tags=25%, list=13%, signal=28%
GO_REGULATION_OF_TOLL_LIKE_RECEPTOR_SIGNALING_PATHWAY	GO_REGULATION_OF_TOLL_LIKE_RECEPTOR_SIGNALING_PATHWAY		31	-0.516471	-1.61764	0.0147679	0.0514032	1	1924	tags=39%, list=17%, signal=46%
GO_POSITIVE_REGULATION_OF_T_CELL_PROLIFERATION	GO_POSITIVE_REGULATION_OF_T_CELL_PROLIFERATION		69	-0.439301	-1.6175	0.00484261	0.0514168	1	889	tags=22%, list=8%, signal=23%
RODWELL_AGING_KIDNEY_UP	RODWELL_AGING_KIDNEY_UP		325	-0.357321	-1.61712	0	0.051549	1	2016	tags=27%, list=17%, signal=32%
HAN_JNK_SINGALING_UP	HAN_JNK_SINGALING_UP		28	-0.530715	-1.61696	0.0154185	0.0515845	1	2462	tags=46%, list=21%, signal=59%
GO_MATERNAL_PROCESS_INVOLVED_IN_FEMALE_PREGNANCY	GO_MATERNAL_PROCESS_INVOLVED_IN_FEMALE_PREGNANCY		42	-0.480326	-1.6169	0.0127119	0.0515685	1	1454	tags=33%, list=13%, signal=38%
GSE3982_DC_VS_TH1_UP	GSE3982_DC_VS_TH1_UP		137	-0.394601	-1.61665	0	0.0516391	1	1766	tags=32%, list=15%, signal=37%
GO_NEGATIVE_REGULATION_OF_CALCIUM_ION_TRANSPORT	GO_NEGATIVE_REGULATION_OF_CALCIUM_ION_TRANSPORT		24	-0.559198	-1.61658	0.0147059	0.0516262	1	2555	tags=46%, list=22%, signal=59%
GSE36476_CTRL_VS_TSST_ACT_16H_MEMORY_CD4_TCELL_OLD_UP	GSE36476_CTRL_VS_TSST_ACT_16H_MEMORY_CD4_TCELL_OLD_UP		140	-0.392384	-1.61657	0	0.0515884	1	1019	tags=19%, list=9%, signal=20%
GSE7852_LN_VS_THYMUS_TCONV_UP	GSE7852_LN_VS_THYMUS_TCONV_UP		142	-0.390636	-1.61611	0	0.0517254	1	1444	tags=23%, list=12%, signal=26%
GO_CATION_TRANSPORTING_ATPASE_ACTIVITY	GO_CATION_TRANSPORTING_ATPASE_ACTIVITY		41	-0.492024	-1.6157	0.0110132	0.0518765	1	1560	tags=34%, list=13%, signal=39%
GO_RESPONSE_TO_GAMMA_RADIATION	GO_RESPONSE_TO_GAMMA_RADIATION		40	-0.493128	-1.61554	0.0215054	0.051915	1	235	tags=15%, list=2%, signal=15%
E47_01	E47_01		133	-0.394663	-1.61554	0	0.0518738	1	1917	tags=25%, list=17%, signal=29%
GSE30971_CTRL_VS_LPS_STIM_MACROPHAGE_WBP7_HET_2H_UP	GSE30971_CTRL_VS_LPS_STIM_MACROPHAGE_WBP7_HET_2H_UP		131	-0.396446	-1.61548	0.00240385	0.05185	1	1787	tags=31%, list=15%, signal=36%
KAN_RESPONSE_TO_ARSENIC_TRIOXIDE	KAN_RESPONSE_TO_ARSENIC_TRIOXIDE		78	-0.432704	-1.61508	0.00427351	0.0519644	1	1672	tags=29%, list=14%, signal=34%
MEK_UP.V1_DN	MEK_UP.V1_DN		139	-0.393291	-1.61497	0	0.051969	1	1412	tags=29%, list=12%, signal=32%
GALE_APL_WITH_FLT3_MUTATED_DN	GALE_APL_WITH_FLT3_MUTATED_DN		16	-0.606427	-1.61493	0.0244444	0.0519485	1	1236	tags=38%, list=11%, signal=42%
BROWNE_HCMV_INFECTION_6HR_UP	BROWNE_HCMV_INFECTION_6HR_UP		38	-0.505441	-1.61482	0.0152174	0.0519584	1	600	tags=24%, list=5%, signal=25%
PID_FGF_PATHWAY	PID_FGF_PATHWAY		39	-0.488815	-1.61482	0.0187891	0.0519173	1	2389	tags=28%, list=21%, signal=35%
GSE9988_LPS_VS_LPS_AND_ANTI_TREM1_MONOCYTE_UP	GSE9988_LPS_VS_LPS_AND_ANTI_TREM1_MONOCYTE_UP		161	-0.385252	-1.61475	0.00222717	0.051898	1	1847	tags=30%, list=16%, signal=35%
GO_CALCIUM_ION_IMPORT	GO_CALCIUM_ION_IMPORT		39	-0.487889	-1.61472	0.0107991	0.0518722	1	1159	tags=21%, list=10%, signal=23%
GO_REGULATION_OF_TYROSINE_PHOSPHORYLATION_OF_STAT_PROTEIN	GO_REGULATION_OF_TYROSINE_PHOSPHORYLATION_OF_STAT_PROTEIN		43	-0.48504	-1.61372	0.0154867	0.0522653	1	2242	tags=42%, list=19%, signal=52%
GO_INTRACELLULAR_LIPID_TRANSPORT	GO_INTRACELLULAR_LIPID_TRANSPORT		15	-0.62106	-1.61351	0.0244399	0.0523259	1	1774	tags=40%, list=15%, signal=47%
GO_REGULATION_OF_LIPID_METABOLIC_PROCESS	GO_REGULATION_OF_LIPID_METABOLIC_PROCESS		168	-0.384585	-1.61343	0	0.0523117	1	1435	tags=23%, list=12%, signal=26%
GSE23502_WT_VS_HDC_KO_MYELOID_DERIVED_SUPPRESSOR_CELL_BM_DN	GSE23502_WT_VS_HDC_KO_MYELOID_DERIVED_SUPPRESSOR_CELL_BM_DN		158	-0.385865	-1.61331	0.0022779	0.0523213	1	2637	tags=41%, list=23%, signal=53%
PAX3_B	PAX3_B		61	-0.454972	-1.61313	0.00212314	0.0523644	1	825	tags=25%, list=7%, signal=26%
MODULE_261	MODULE_261		87	-0.420597	-1.6129	0.00417537	0.0524138	1	1829	tags=33%, list=16%, signal=39%
RUIZ_TNC_TARGETS_UP	RUIZ_TNC_TARGETS_UP		102	-0.41808	-1.61281	0.00458716	0.0524157	1	1516	tags=29%, list=13%, signal=34%
GO_RESPONSE_TO_ORGANOPHOSPHORUS	GO_RESPONSE_TO_ORGANOPHOSPHORUS		73	-0.432831	-1.61246	0.00208333	0.0525219	1	2482	tags=33%, list=21%, signal=42%
GSE43955_1H_VS_42H_ACT_CD4_TCELL_WITH_TGFB_IL6_DN	GSE43955_1H_VS_42H_ACT_CD4_TCELL_WITH_TGFB_IL6_DN		117	-0.392958	-1.61229	0.00227273	0.0525591	1	1545	tags=25%, list=13%, signal=28%
CREB_Q4_01	CREB_Q4_01		151	-0.389098	-1.61225	0	0.0525341	1	1388	tags=22%, list=12%, signal=25%
GSE17301_IFNA2_VS_IFNA5_STIM_ACD3_ACD28_ACT_CD8_TCELL_UP	GSE17301_IFNA2_VS_IFNA5_STIM_ACD3_ACD28_ACT_CD8_TCELL_UP		162	-0.38699	-1.61223	0	0.0525112	1	1742	tags=22%, list=15%, signal=25%
HALLMARK_ESTROGEN_RESPONSE_EARLY	HALLMARK_ESTROGEN_RESPONSE_EARLY		123	-0.399613	-1.61214	0	0.0525055	1	1674	tags=31%, list=14%, signal=36%
GO_REGULATION_OF_MYELOID_CELL_APOPTOTIC_PROCESS	GO_REGULATION_OF_MYELOID_CELL_APOPTOTIC_PROCESS		16	-0.611133	-1.61192	0.0311111	0.0525621	1	779	tags=31%, list=7%, signal=33%
GSE17721_PAM3CSK4_VS_GADIQUIMOD_1H_BMDC_UP	GSE17721_PAM3CSK4_VS_GADIQUIMOD_1H_BMDC_UP		111	-0.406024	-1.61177	0.00226757	0.052582	1	1910	tags=29%, list=16%, signal=34%
GSE17721_CPG_VS_GARDIQUIMOD_6H_BMDC_UP	GSE17721_CPG_VS_GARDIQUIMOD_6H_BMDC_UP		138	-0.39111	-1.61142	0	0.0526844	1	1797	tags=27%, list=16%, signal=31%
GSE23321_EFFECTOR_MEMORY_VS_NAIVE_CD8_TCELL_UP	GSE23321_EFFECTOR_MEMORY_VS_NAIVE_CD8_TCELL_UP		104	-0.411648	-1.61124	0.00223214	0.052716	1	840	tags=16%, list=7%, signal=17%
GO_CHEMICAL_HOMEOSTASIS	GO_CHEMICAL_HOMEOSTASIS		452	-0.343024	-1.61123	0	0.0526781	1	1614	tags=21%, list=14%, signal=23%
GO_NEGATIVE_REGULATION_OF_CELL_PROLIFERATION	GO_NEGATIVE_REGULATION_OF_CELL_PROLIFERATION		393	-0.348959	-1.61117	0	0.0526745	1	1271	tags=17%, list=11%, signal=18%
HAN_SATB1_TARGETS_DN	HAN_SATB1_TARGETS_DN		316	-0.356408	-1.61114	0	0.0526432	1	1494	tags=22%, list=13%, signal=25%
GO_POSITIVE_REGULATION_OF_INTERLEUKIN_1_PRODUCTION	GO_POSITIVE_REGULATION_OF_INTERLEUKIN_1_PRODUCTION		24	-0.526023	-1.61081	0.0127119	0.0527569	1	2529	tags=50%, list=22%, signal=64%
GO_TRANSPORT_VESICLE	GO_TRANSPORT_VESICLE		213	-0.370817	-1.6108	0	0.0527202	1	1240	tags=21%, list=11%, signal=23%
MODULE_19	MODULE_19		187	-0.375302	-1.60993	0.00224719	0.0530592	1	1674	tags=22%, list=14%, signal=26%
GSE22196_HEALTHY_VS_OBESE_MOUSE_SKIN_GAMMADELTA_TCELL_UP	GSE22196_HEALTHY_VS_OBESE_MOUSE_SKIN_GAMMADELTA_TCELL_UP		164	-0.381326	-1.60976	0	0.0530958	1	1831	tags=27%, list=16%, signal=32%
GSE7831_UNSTIM_VS_CPG_STIM_PDC_4H_DN	GSE7831_UNSTIM_VS_CPG_STIM_PDC_4H_DN		147	-0.387307	-1.6096	0	0.0531207	1	2173	tags=31%, list=19%, signal=37%
MODULE_123	MODULE_123		159	-0.380061	-1.60958	0	0.0530924	1	1192	tags=16%, list=10%, signal=18%
GO_NEGATIVE_REGULATION_OF_FIBROBLAST_PROLIFERATION	GO_NEGATIVE_REGULATION_OF_FIBROBLAST_PROLIFERATION		20	-0.571603	-1.60952	0.018	0.0530661	1	1519	tags=40%, list=13%, signal=46%
BIOCARTA_BCR_PATHWAY	BIOCARTA_BCR_PATHWAY		32	-0.50895	-1.60943	0.0129032	0.0530634	1	611	tags=16%, list=5%, signal=16%
HALLMARK_NOTCH_SIGNALING	HALLMARK_NOTCH_SIGNALING		24	-0.548427	-1.6094	0.0233051	0.0530351	1	1674	tags=33%, list=14%, signal=39%
HUANG_FOXA2_TARGETS_DN	HUANG_FOXA2_TARGETS_DN		17	-0.591085	-1.60906	0.0125786	0.053135	1	2222	tags=47%, list=19%, signal=58%
GSE36826_WT_VS_IL1R_KO_SKIN_UP	GSE36826_WT_VS_IL1R_KO_SKIN_UP		154	-0.384629	-1.6089	0	0.0531713	1	868	tags=16%, list=7%, signal=17%
MA_MYELOID_DIFFERENTIATION_DN	MA_MYELOID_DIFFERENTIATION_DN		31	-0.520234	-1.60865	0.0194384	0.0532296	1	1737	tags=32%, list=15%, signal=38%
GO_REGULATION_OF_VIRAL_GENOME_REPLICATION	GO_REGULATION_OF_VIRAL_GENOME_REPLICATION		63	-0.452307	-1.60863	0.0111359	0.0531981	1	1460	tags=30%, list=13%, signal=34%
GSE24634_TEFF_VS_TCONV_DAY3_IN_CULTURE_DN	GSE24634_TEFF_VS_TCONV_DAY3_IN_CULTURE_DN		141	-0.39169	-1.60854	0	0.0531899	1	1714	tags=29%, list=15%, signal=34%
MTOR_UP.V1_DN	MTOR_UP.V1_DN		97	-0.410245	-1.60838	0.00215054	0.0532048	1	2004	tags=27%, list=17%, signal=32%
GSE13738_TCR_VS_BYSTANDER_ACTIVATED_CD4_TCELL_DN	GSE13738_TCR_VS_BYSTANDER_ACTIVATED_CD4_TCELL_DN		150	-0.38424	-1.60808	0	0.0532905	1	2264	tags=36%, list=20%, signal=44%
GO_B_CELL_DIFFERENTIATION	GO_B_CELL_DIFFERENTIATION		54	-0.46424	-1.60802	0.0157658	0.0532675	1	1155	tags=28%, list=10%, signal=31%
PKCA_DN.V1_UP	PKCA_DN.V1_UP		75	-0.430453	-1.60776	0	0.0533244	1	836	tags=16%, list=7%, signal=17%
GSE34156_NOD2_LIGAND_VS_TLR1_TLR2_LIGAND_6H_TREATED_MONOCYTE_DN	GSE34156_NOD2_LIGAND_VS_TLR1_TLR2_LIGAND_6H_TREATED_MONOCYTE_DN		127	-0.3982	-1.60773	0	0.0532962	1	1708	tags=28%, list=15%, signal=33%
GSE16385_IFNG_TNF_VS_UNSTIM_MACROPHAGE_ROSIGLITAZONE_TREATED_DN	GSE16385_IFNG_TNF_VS_UNSTIM_MACROPHAGE_ROSIGLITAZONE_TREATED_DN		169	-0.377121	-1.60773	0	0.0532564	1	1748	tags=27%, list=15%, signal=32%
NEWMAN_ERCC6_TARGETS_UP	NEWMAN_ERCC6_TARGETS_UP		19	-0.584464	-1.60753	0.0286299	0.0532935	1	1280	tags=32%, list=11%, signal=35%
GSE27241_CTRL_VS_DIGOXIN_TREATED_CD4_TCELL_IN_TH17_POLARIZING_CONDITIONS_DN	GSE27241_CTRL_VS_DIGOXIN_TREATED_CD4_TCELL_IN_TH17_POLARIZING_CONDITIONS_DN		150	-0.385286	-1.60749	0.00462963	0.0532695	1	1881	tags=30%, list=16%, signal=35%
GO_REGULATION_OF_CALCIUM_ION_TRANSPORT	GO_REGULATION_OF_CALCIUM_ION_TRANSPORT		104	-0.411958	-1.60714	0.00678733	0.0533651	1	1043	tags=21%, list=9%, signal=23%
GO_LYMPHOCYTE_ACTIVATION	GO_LYMPHOCYTE_ACTIVATION		244	-0.364122	-1.60699	0	0.0533841	1	2179	tags=31%, list=19%, signal=37%
MIKKELSEN_MEF_ICP_WITH_H3K27ME3	MIKKELSEN_MEF_ICP_WITH_H3K27ME3		54	-0.463622	-1.60683	0.0109649	0.053424	1	1320	tags=24%, list=11%, signal=27%
GSE17721_12H_VS_24H_CPG_BMDC_UP	GSE17721_12H_VS_24H_CPG_BMDC_UP		119	-0.40521	-1.60656	0.0021692	0.0534983	1	1685	tags=26%, list=15%, signal=30%
GSE36476_CTRL_VS_TSST_ACT_16H_MEMORY_CD4_TCELL_YOUNG_UP	GSE36476_CTRL_VS_TSST_ACT_16H_MEMORY_CD4_TCELL_YOUNG_UP		159	-0.378027	-1.60575	0	0.0538404	1	2004	tags=28%, list=17%, signal=33%
GSE360_L_DONOVANI_VS_M_TUBERCULOSIS_DC_DN	GSE360_L_DONOVANI_VS_M_TUBERCULOSIS_DC_DN		133	-0.39349	-1.60567	0.00769231	0.0538329	1	1378	tags=31%, list=12%, signal=35%
GSE17974_1H_VS_72H_UNTREATED_IN_VITRO_CD4_TCELL_UP	GSE17974_1H_VS_72H_UNTREATED_IN_VITRO_CD4_TCELL_UP		159	-0.378108	-1.60496	0	0.054129	1	1523	tags=18%, list=13%, signal=21%
GO_GLYCOLIPID_BIOSYNTHETIC_PROCESS	GO_GLYCOLIPID_BIOSYNTHETIC_PROCESS		46	-0.46596	-1.60465	0.0142518	0.0542276	1	1055	tags=24%, list=9%, signal=26%
SWEET_LUNG_CANCER_KRAS_UP	SWEET_LUNG_CANCER_KRAS_UP		352	-0.347847	-1.60441	0	0.0542979	1	1977	tags=26%, list=17%, signal=31%
GO_POSITIVE_REGULATION_OF_CELL_DIFFERENTIATION	GO_POSITIVE_REGULATION_OF_CELL_DIFFERENTIATION		451	-0.342249	-1.604	0	0.054464	1	2414	tags=30%, list=21%, signal=36%
MODULE_172	MODULE_172		41	-0.474514	-1.60393	0.00852879	0.0544612	1	1805	tags=39%, list=16%, signal=46%
KEGG_ALDOSTERONE_REGULATED_SODIUM_REABSORPTION	KEGG_ALDOSTERONE_REGULATED_SODIUM_REABSORPTION		24	-0.524977	-1.60375	0.0286299	0.0545021	1	2232	tags=42%, list=19%, signal=52%
GSE24142_EARLY_THYMIC_PROGENITOR_VS_DN3_THYMOCYTE_ADULT_UP	GSE24142_EARLY_THYMIC_PROGENITOR_VS_DN3_THYMOCYTE_ADULT_UP		150	-0.387919	-1.60371	0.00236967	0.0544869	1	2205	tags=35%, list=19%, signal=42%
GO_REGULATION_OF_CALCIUM_MEDIATED_SIGNALING	GO_REGULATION_OF_CALCIUM_MEDIATED_SIGNALING		40	-0.484074	-1.60357	0.014862	0.054507	1	2404	tags=43%, list=21%, signal=53%
GO_REGULATED_EXOCYTOSIS	GO_REGULATED_EXOCYTOSIS		120	-0.399193	-1.60303	0.00677201	0.0547035	1	2206	tags=28%, list=19%, signal=34%
VANDESLUIS_COMMD1_TARGETS_GROUP_3_UP	VANDESLUIS_COMMD1_TARGETS_GROUP_3_UP		46	-0.472678	-1.60297	0.01373	0.0546913	1	1009	tags=24%, list=9%, signal=26%
GO_REGULATION_OF_TYROSINE_PHOSPHORYLATION_OF_STAT3_PROTEIN	GO_REGULATION_OF_TYROSINE_PHOSPHORYLATION_OF_STAT3_PROTEIN		31	-0.518799	-1.60292	0.015625	0.0546801	1	2453	tags=48%, list=21%, signal=61%
GSE2770_TGFB_AND_IL4_ACT_VS_ACT_CD4_TCELL_48H_DN	GSE2770_TGFB_AND_IL4_ACT_VS_ACT_CD4_TCELL_48H_DN		153	-0.389089	-1.60272	0.00228833	0.05473	1	1926	tags=25%, list=17%, signal=30%
ELVIDGE_HIF1A_AND_HIF2A_TARGETS_DN	ELVIDGE_HIF1A_AND_HIF2A_TARGETS_DN		79	-0.427643	-1.60268	0.00476191	0.0547084	1	1630	tags=25%, list=14%, signal=29%
GSE29949_MICROGLIA_BRAIN_VS_MONOCYTE_BONE_MARROW_DN	GSE29949_MICROGLIA_BRAIN_VS_MONOCYTE_BONE_MARROW_DN		163	-0.380838	-1.60246	0	0.0547694	1	1279	tags=19%, list=11%, signal=21%
AMIT_EGF_RESPONSE_60_MCF10A	AMIT_EGF_RESPONSE_60_MCF10A		29	-0.518759	-1.60228	0.0144928	0.0548036	1	1413	tags=38%, list=12%, signal=43%
GO_POSITIVE_REGULATION_OF_LEUKOCYTE_PROLIFERATION	GO_POSITIVE_REGULATION_OF_LEUKOCYTE_PROLIFERATION		95	-0.417065	-1.60207	0	0.0548459	1	2575	tags=41%, list=22%, signal=52%
GO_CALCIUM_CHANNEL_COMPLEX	GO_CALCIUM_CHANNEL_COMPLEX		20	-0.57257	-1.60207	0.0313808	0.0548057	1	2905	tags=55%, list=25%, signal=73%
GO_PROTEIN_DISULFIDE_OXIDOREDUCTASE_ACTIVITY	GO_PROTEIN_DISULFIDE_OXIDOREDUCTASE_ACTIVITY		15	-0.614248	-1.602	0.0266075	0.0547883	1	1383	tags=33%, list=12%, signal=38%
GO_METAL_ION_TRANSPORT	GO_METAL_ION_TRANSPORT		261	-0.360398	-1.60153	0	0.0549757	1	1799	tags=24%, list=16%, signal=27%
WINTER_HYPOXIA_METAGENE	WINTER_HYPOXIA_METAGENE		172	-0.378979	-1.60147	0	0.0549643	1	1010	tags=17%, list=9%, signal=19%
GSE15735_CTRL_VS_HDAC_INHIBITOR_TREATED_CD4_TCELL_2H_UP	GSE15735_CTRL_VS_HDAC_INHIBITOR_TREATED_CD4_TCELL_2H_UP		162	-0.382385	-1.6012	0.00217865	0.0550731	1	1812	tags=27%, list=16%, signal=32%
GSE17721_POLYIC_VS_GARDIQUIMOD_16H_BMDC_UP	GSE17721_POLYIC_VS_GARDIQUIMOD_16H_BMDC_UP		146	-0.385968	-1.60114	0	0.0550616	1	1812	tags=28%, list=16%, signal=33%
GO_NEGATIVE_REGULATION_OF_CYTOKINE_PRODUCTION	GO_NEGATIVE_REGULATION_OF_CYTOKINE_PRODUCTION		139	-0.392393	-1.6011	0.00253807	0.0550348	1	1279	tags=24%, list=11%, signal=26%
BIOCARTA_AGR_PATHWAY	BIOCARTA_AGR_PATHWAY		20	-0.580765	-1.60094	0.0179372	0.0550706	1	2171	tags=50%, list=19%, signal=61%
KEGG_VEGF_SIGNALING_PATHWAY	KEGG_VEGF_SIGNALING_PATHWAY		55	-0.456895	-1.60057	0.011236	0.0551988	1	1917	tags=31%, list=17%, signal=37%
GSE9988_LOW_LPS_VS_ANTI_TREM1_AND_LPS_MONOCYTE_UP	GSE9988_LOW_LPS_VS_ANTI_TREM1_AND_LPS_MONOCYTE_UP		153	-0.384095	-1.60035	0	0.0552693	1	1890	tags=28%, list=16%, signal=33%
CEBPDELTA_Q6	CEBPDELTA_Q6		128	-0.393754	-1.59996	0.00241546	0.0554092	1	1556	tags=23%, list=13%, signal=26%
GO_CELL_MORPHOGENESIS_INVOLVED_IN_NEURON_DIFFERENTIATION	GO_CELL_MORPHOGENESIS_INVOLVED_IN_NEURON_DIFFERENTIATION		158	-0.380443	-1.59989	0.00230947	0.0554006	1	2537	tags=33%, list=22%, signal=42%
GSE30971_CTRL_VS_LPS_STIM_MACROPHAGE_WBP7_KO_4H_UP	GSE30971_CTRL_VS_LPS_STIM_MACROPHAGE_WBP7_KO_4H_UP		134	-0.387791	-1.59987	0	0.0553685	1	1665	tags=29%, list=14%, signal=34%
GSE3039_ALPHAALPHA_VS_ALPHABETA_CD8_TCELL_UP	GSE3039_ALPHAALPHA_VS_ALPHABETA_CD8_TCELL_UP		146	-0.389824	-1.59969	0	0.0554152	1	943	tags=16%, list=8%, signal=17%
GSE16522_MEMORY_VS_NAIVE_ANTI_CD3CD28_STIM_CD8_TCELL_UP	GSE16522_MEMORY_VS_NAIVE_ANTI_CD3CD28_STIM_CD8_TCELL_UP		158	-0.381696	-1.59968	0	0.055374	1	1431	tags=22%, list=12%, signal=25%
MITSIADES_RESPONSE_TO_APLIDIN_UP	MITSIADES_RESPONSE_TO_APLIDIN_UP		365	-0.347873	-1.59919	0	0.0555652	1	1723	tags=25%, list=15%, signal=29%
GO_REGULATION_OF_NEURON_APOPTOTIC_PROCESS	GO_REGULATION_OF_NEURON_APOPTOTIC_PROCESS		117	-0.404578	-1.5987	0.00228311	0.0557392	1	2026	tags=29%, list=17%, signal=35%
GO_REGULATION_OF_VIRAL_ENTRY_INTO_HOST_CELL	GO_REGULATION_OF_VIRAL_ENTRY_INTO_HOST_CELL		16	-0.610834	-1.59844	0.0178971	0.0558119	1	793	tags=38%, list=7%, signal=40%
REACTOME_NUCLEAR_RECEPTOR_TRANSCRIPTION_PATHWAY	REACTOME_NUCLEAR_RECEPTOR_TRANSCRIPTION_PATHWAY		24	-0.544186	-1.59817	0.015873	0.0558956	1	981	tags=21%, list=8%, signal=23%
GSE22935_WT_VS_MYD88_KO_MACROPHAGE_12H_MBOVIS_BCG_STIM_UP	GSE22935_WT_VS_MYD88_KO_MACROPHAGE_12H_MBOVIS_BCG_STIM_UP		128	-0.388747	-1.59816	0	0.0558582	1	1867	tags=27%, list=16%, signal=31%
GO_NEGATIVE_REGULATION_OF_ESTABLISHMENT_OF_PROTEIN_LOCALIZATION	GO_NEGATIVE_REGULATION_OF_ESTABLISHMENT_OF_PROTEIN_LOCALIZATION		134	-0.387611	-1.59786	0.00236967	0.055952	1	1463	tags=22%, list=13%, signal=24%
ZWANG_EGF_INTERVAL_DN	ZWANG_EGF_INTERVAL_DN		137	-0.386123	-1.59752	0	0.0560486	1	1924	tags=25%, list=17%, signal=29%
GSE13485_DAY3_VS_DAY21_YF17D_VACCINE_PBMC_UP	GSE13485_DAY3_VS_DAY21_YF17D_VACCINE_PBMC_UP		167	-0.378943	-1.59737	0	0.0560772	1	2123	tags=29%, list=18%, signal=35%
GSE42724_MEMORY_VS_B1_BCELL_DN	GSE42724_MEMORY_VS_B1_BCELL_DN		154	-0.381684	-1.59728	0	0.0560905	1	1711	tags=30%, list=15%, signal=35%
GSE1925_CTRL_VS_IFNG_PRIMED_MACROPHAGE_24H_IFNG_STIM_DN	GSE1925_CTRL_VS_IFNG_PRIMED_MACROPHAGE_24H_IFNG_STIM_DN		163	-0.381347	-1.59716	0.00240385	0.0560997	1	1461	tags=26%, list=13%, signal=30%
GO_CALCIUM_ION_IMPORT_INTO_CYTOSOL	GO_CALCIUM_ION_IMPORT_INTO_CYTOSOL		28	-0.524455	-1.59682	0.0191489	0.0562042	1	1462	tags=25%, list=13%, signal=29%
GO_ACTIVATION_OF_IMMUNE_RESPONSE	GO_ACTIVATION_OF_IMMUNE_RESPONSE		299	-0.352935	-1.59672	0	0.0562113	1	2770	tags=36%, list=24%, signal=46%
GO_REGULATION_OF_CATION_CHANNEL_ACTIVITY	GO_REGULATION_OF_CATION_CHANNEL_ACTIVITY		43	-0.47141	-1.5966	0.0172786	0.0562214	1	2555	tags=47%, list=22%, signal=59%
GSE24142_DN2_VS_DN3_THYMOCYTE_DN	GSE24142_DN2_VS_DN3_THYMOCYTE_DN		147	-0.387168	-1.59642	0	0.0562598	1	1507	tags=21%, list=13%, signal=24%
GSE43956_WT_VS_SGK1_KO_TH17_DIFFERENTIATED_CD4_TCELL_DN	GSE43956_WT_VS_SGK1_KO_TH17_DIFFERENTIATED_CD4_TCELL_DN		157	-0.386039	-1.59617	0	0.0563235	1	1480	tags=21%, list=13%, signal=24%
GSE7852_THYMUS_VS_FAT_TREG_DN	GSE7852_THYMUS_VS_FAT_TREG_DN		129	-0.393336	-1.59586	0	0.0564436	1	1723	tags=27%, list=15%, signal=32%
ST_GA13_PATHWAY	ST_GA13_PATHWAY		29	-0.514648	-1.5953	0.0265487	0.0566494	1	1164	tags=24%, list=10%, signal=27%
STK33_SKM_UP	STK33_SKM_UP		202	-0.367061	-1.59527	0	0.0566169	1	1392	tags=21%, list=12%, signal=24%
GSE3982_EOSINOPHIL_VS_BASOPHIL_UP	GSE3982_EOSINOPHIL_VS_BASOPHIL_UP		132	-0.398299	-1.59521	0.00250627	0.0566096	1	1695	tags=26%, list=15%, signal=30%
GREGORY_SYNTHETIC_LETHAL_WITH_IMATINIB	GREGORY_SYNTHETIC_LETHAL_WITH_IMATINIB		106	-0.406487	-1.59521	0.0070922	0.0565681	1	1758	tags=29%, list=15%, signal=34%
GSE21670_IL6_VS_TGFB_AND_IL6_TREATED_STAT3_KO_CD4_TCELL_DN	GSE21670_IL6_VS_TGFB_AND_IL6_TREATED_STAT3_KO_CD4_TCELL_DN		145	-0.387357	-1.59513	0	0.0565659	1	1715	tags=22%, list=15%, signal=26%
GO_PHAGOCYTIC_VESICLE_MEMBRANE	GO_PHAGOCYTIC_VESICLE_MEMBRANE		48	-0.47473	-1.59504	0.0104603	0.0565638	1	1514	tags=31%, list=13%, signal=36%
GSE46606_UNSTIM_VS_CD40L_IL2_IL5_1DAY_STIMULATED_IRF4MID_SORTED_BCELL_UP	GSE46606_UNSTIM_VS_CD40L_IL2_IL5_1DAY_STIMULATED_IRF4MID_SORTED_BCELL_UP		168	-0.376365	-1.59487	0	0.0566198	1	825	tags=14%, list=7%, signal=15%
YIH_RESPONSE_TO_ARSENITE_C1	YIH_RESPONSE_TO_ARSENITE_C1		19	-0.574114	-1.59472	0.0172043	0.0566547	1	963	tags=26%, list=8%, signal=29%
GO_POSITIVE_REGULATION_OF_HEART_CONTRACTION	GO_POSITIVE_REGULATION_OF_HEART_CONTRACTION		15	-0.602913	-1.59468	0.0240175	0.0566234	1	1995	tags=60%, list=17%, signal=72%
HALLMARK_COAGULATION	HALLMARK_COAGULATION		51	-0.459888	-1.59462	0.0133333	0.0566091	1	1802	tags=31%, list=16%, signal=37%
HOFFMANN_PRE_BI_TO_LARGE_PRE_BII_LYMPHOCYTE_DN	HOFFMANN_PRE_BI_TO_LARGE_PRE_BII_LYMPHOCYTE_DN		51	-0.459233	-1.59434	0.01373	0.056706	1	1740	tags=33%, list=15%, signal=39%
GSE9960_GRAM_NEG_VS_GRAM_NEG_AND_POS_SEPSIS_PBMC_UP	GSE9960_GRAM_NEG_VS_GRAM_NEG_AND_POS_SEPSIS_PBMC_UP		101	-0.405139	-1.59411	0.00423729	0.0567716	1	1817	tags=31%, list=16%, signal=36%
BROWNE_HCMV_INFECTION_4HR_UP	BROWNE_HCMV_INFECTION_4HR_UP		33	-0.512648	-1.59375	0.0243902	0.0568964	1	1610	tags=36%, list=14%, signal=42%
GO_NEGATIVE_REGULATION_OF_TRANSPORT	GO_NEGATIVE_REGULATION_OF_TRANSPORT		261	-0.356162	-1.59358	0	0.0569158	1	2479	tags=32%, list=21%, signal=40%
GO_POSITIVE_REGULATION_OF_LEUKOCYTE_CHEMOTAXIS	GO_POSITIVE_REGULATION_OF_LEUKOCYTE_CHEMOTAXIS		45	-0.474014	-1.59354	0.00873363	0.0568963	1	2453	tags=38%, list=21%, signal=48%
GSE16266_CTRL_VS_LPS_STIM_MEF_DN	GSE16266_CTRL_VS_LPS_STIM_MEF_DN		110	-0.399531	-1.59348	0	0.0568809	1	1253	tags=19%, list=11%, signal=21%
CAMP_UP.V1_DN	CAMP_UP.V1_DN		149	-0.38569	-1.59319	0.00226757	0.0569772	1	1761	tags=26%, list=15%, signal=30%
GO_NEGATIVE_REGULATION_OF_BLOOD_CIRCULATION	GO_NEGATIVE_REGULATION_OF_BLOOD_CIRCULATION		17	-0.589175	-1.5931	0.03125	0.0569868	1	1554	tags=35%, list=13%, signal=41%
SHIPP_DLBCL_CURED_VS_FATAL_UP	SHIPP_DLBCL_CURED_VS_FATAL_UP		16	-0.597285	-1.59293	0.0306748	0.0570181	1	981	tags=38%, list=8%, signal=41%
GARGALOVIC_RESPONSE_TO_OXIDIZED_PHOSPHOLIPIDS_RED_UP	GARGALOVIC_RESPONSE_TO_OXIDIZED_PHOSPHOLIPIDS_RED_UP		17	-0.580199	-1.59272	0.0262626	0.057083	1	2052	tags=35%, list=18%, signal=43%
GNF2_PTPN6	GNF2_PTPN6		46	-0.471176	-1.59271	0.00867679	0.0570487	1	2002	tags=43%, list=17%, signal=52%
GOZGIT_ESR1_TARGETS_DN	GOZGIT_ESR1_TARGETS_DN		419	-0.343204	-1.5925	0	0.0570985	1	2021	tags=27%, list=17%, signal=32%
GO_UNSATURATED_FATTY_ACID_METABOLIC_PROCESS	GO_UNSATURATED_FATTY_ACID_METABOLIC_PROCESS		51	-0.460781	-1.59241	0.00626305	0.0571029	1	2277	tags=43%, list=20%, signal=53%
GO_LRR_DOMAIN_BINDING	GO_LRR_DOMAIN_BINDING		15	-0.6046	-1.59234	0.030303	0.0570883	1	320	tags=13%, list=3%, signal=14%
GSE24634_IL4_VS_CTRL_TREATED_NAIVE_CD4_TCELL_DAY5_UP	GSE24634_IL4_VS_CTRL_TREATED_NAIVE_CD4_TCELL_DAY5_UP		149	-0.388735	-1.59222	0	0.0571096	1	2591	tags=39%, list=22%, signal=50%
GSE15330_LYMPHOID_MULTIPOTENT_VS_MEGAKARYOCYTE_ERYTHROID_PROGENITOR_IKAROS_KO_DN	GSE15330_LYMPHOID_MULTIPOTENT_VS_MEGAKARYOCYTE_ERYTHROID_PROGENITOR_IKAROS_KO_DN		151	-0.388535	-1.59179	0	0.0572555	1	1908	tags=31%, list=16%, signal=37%
GSE37416_0H_VS_6H_F_TULARENSIS_LVS_NEUTROPHIL_DN	GSE37416_0H_VS_6H_F_TULARENSIS_LVS_NEUTROPHIL_DN		165	-0.376661	-1.59162	0	0.0572893	1	2328	tags=35%, list=20%, signal=43%
GAUSSMANN_MLL_AF4_FUSION_TARGETS_F_UP	GAUSSMANN_MLL_AF4_FUSION_TARGETS_F_UP		102	-0.400665	-1.59159	0	0.057259	1	1309	tags=25%, list=11%, signal=27%
GO_TRANSCRIPTIONAL_ACTIVATOR_ACTIVITY_RNA_POLYMERASE_II_DISTAL_ENHANCER_SEQUENCE_SPECIFIC_BINDING	GO_TRANSCRIPTIONAL_ACTIVATOR_ACTIVITY_RNA_POLYMERASE_II_DISTAL_ENHANCER_SEQUENCE_SPECIFIC_BINDING		18	-0.570611	-1.59144	0.0254777	0.0572948	1	638	tags=22%, list=6%, signal=23%
GSE24142_EARLY_THYMIC_PROGENITOR_VS_DN2_THYMOCYTE_ADULT_UP	GSE24142_EARLY_THYMIC_PROGENITOR_VS_DN2_THYMOCYTE_ADULT_UP		147	-0.385658	-1.59143	0.00236967	0.0572536	1	1712	tags=30%, list=15%, signal=35%
GSE9960_GRAM_POS_VS_GRAM_NEG_AND_POS_SEPSIS_PBMC_UP	GSE9960_GRAM_POS_VS_GRAM_NEG_AND_POS_SEPSIS_PBMC_UP		170	-0.376121	-1.5909	0	0.0574669	1	1329	tags=18%, list=11%, signal=20%
GO_REGULATION_OF_RESPONSE_TO_CYTOKINE_STIMULUS	GO_REGULATION_OF_RESPONSE_TO_CYTOKINE_STIMULUS		103	-0.400316	-1.59087	0	0.0574434	1	943	tags=19%, list=8%, signal=21%
GO_ENDOPLASMIC_RETICULUM_LUMEN	GO_ENDOPLASMIC_RETICULUM_LUMEN		97	-0.414658	-1.59084	0.00212766	0.0574149	1	1630	tags=27%, list=14%, signal=31%
ADDYA_ERYTHROID_DIFFERENTIATION_BY_HEMIN	ADDYA_ERYTHROID_DIFFERENTIATION_BY_HEMIN		62	-0.44155	-1.59024	0.00675676	0.0576483	1	995	tags=23%, list=9%, signal=25%
GO_NEGATIVE_REGULATION_OF_OSTEOBLAST_DIFFERENTIATION	GO_NEGATIVE_REGULATION_OF_OSTEOBLAST_DIFFERENTIATION		18	-0.578473	-1.58911	0.0174292	0.0581214	1	2251	tags=39%, list=19%, signal=48%
GO_CAMP_METABOLIC_PROCESS	GO_CAMP_METABOLIC_PROCESS		18	-0.581607	-1.58895	0.0373444	0.0581643	1	3310	tags=56%, list=29%, signal=78%
BIOCARTA_PPARA_PATHWAY	BIOCARTA_PPARA_PATHWAY		46	-0.475893	-1.5887	0.0132743	0.0582434	1	1899	tags=30%, list=16%, signal=36%
HALLMARK_ANGIOGENESIS	HALLMARK_ANGIOGENESIS		15	-0.605321	-1.58869	0.0403397	0.0582057	1	963	tags=27%, list=8%, signal=29%
GO_REGULATION_OF_INTRINSIC_APOPTOTIC_SIGNALING_PATHWAY	GO_REGULATION_OF_INTRINSIC_APOPTOTIC_SIGNALING_PATHWAY		116	-0.399275	-1.58829	0	0.0583504	1	1389	tags=22%, list=12%, signal=24%
GSE39820_CTRL_VS_IL1B_IL6_IL23A_CD4_TCELL_DN	GSE39820_CTRL_VS_IL1B_IL6_IL23A_CD4_TCELL_DN		155	-0.382733	-1.58807	0	0.0584028	1	2254	tags=27%, list=19%, signal=33%
GO_AMIDE_TRANSPORT	GO_AMIDE_TRANSPORT		43	-0.469149	-1.58792	0.00665188	0.0584316	1	1321	tags=30%, list=11%, signal=34%
MODULE_60	MODULE_60		239	-0.362127	-1.58772	0	0.0584848	1	2002	tags=28%, list=17%, signal=33%
GSE30971_WBP7_HET_VS_KO_MACROPHAGE_2H_LPS_STIM_DN	GSE30971_WBP7_HET_VS_KO_MACROPHAGE_2H_LPS_STIM_DN		141	-0.38461	-1.5876	0.00230415	0.0584961	1	2311	tags=34%, list=20%, signal=42%
HELLER_HDAC_TARGETS_SILENCED_BY_METHYLATION_UP	HELLER_HDAC_TARGETS_SILENCED_BY_METHYLATION_UP		283	-0.353727	-1.58739	0	0.0585588	1	1287	tags=21%, list=11%, signal=23%
GSE2706_2H_VS_8H_LPS_STIM_DC_UP	GSE2706_2H_VS_8H_LPS_STIM_DC_UP		143	-0.385522	-1.58737	0	0.058524	1	1032	tags=15%, list=9%, signal=16%
HNF3_Q6	HNF3_Q6		90	-0.417709	-1.58733	0.0021097	0.0584989	1	1482	tags=26%, list=13%, signal=29%
GO_REGULATION_OF_RECEPTOR_INTERNALIZATION	GO_REGULATION_OF_RECEPTOR_INTERNALIZATION		20	-0.558977	-1.58732	0.0301724	0.0584612	1	1150	tags=40%, list=10%, signal=44%
GO_REGULATION_OF_ION_HOMEOSTASIS	GO_REGULATION_OF_ION_HOMEOSTASIS		105	-0.401892	-1.58711	0.00233645	0.0585124	1	1375	tags=21%, list=12%, signal=24%
GSE16385_IFNG_TNF_VS_UNSTIM_MACROPHAGE_ROSIGLITAZONE_TREATED_UP	GSE16385_IFNG_TNF_VS_UNSTIM_MACROPHAGE_ROSIGLITAZONE_TREATED_UP		121	-0.394625	-1.58688	0	0.0585837	1	1723	tags=30%, list=15%, signal=35%
GSE3982_NEUTROPHIL_VS_EFF_MEMORY_CD4_TCELL_UP	GSE3982_NEUTROPHIL_VS_EFF_MEMORY_CD4_TCELL_UP		158	-0.376922	-1.58678	0.00238663	0.0585879	1	2371	tags=34%, list=20%, signal=42%
GSE41176_WT_VS_TAK1_KO_ANTI_IGM_STIM_BCELL_6H_UP	GSE41176_WT_VS_TAK1_KO_ANTI_IGM_STIM_BCELL_6H_UP		138	-0.388416	-1.58592	0.0022779	0.0589431	1	741	tags=13%, list=6%, signal=14%
GSE39916_B_CELL_SPLEEN_VS_PLASMA_CELL_BONE_MARROW_DN	GSE39916_B_CELL_SPLEEN_VS_PLASMA_CELL_BONE_MARROW_DN		146	-0.387055	-1.58584	0.00488998	0.0589402	1	2537	tags=38%, list=22%, signal=48%
MANTOVANI_NFKB_TARGETS_UP	MANTOVANI_NFKB_TARGETS_UP		21	-0.547435	-1.58575	0.0326087	0.0589528	1	1917	tags=43%, list=17%, signal=51%
GSE20727_CTRL_VS_H2O2_TREATED_DC_UP	GSE20727_CTRL_VS_H2O2_TREATED_DC_UP		160	-0.377087	-1.58562	0.0022779	0.0589858	1	2233	tags=36%, list=19%, signal=44%
KRAS.KIDNEY_UP.V1_DN	KRAS.KIDNEY_UP.V1_DN		53	-0.45961	-1.58532	0.0147059	0.0591001	1	1124	tags=26%, list=10%, signal=29%
GSE35825_UNTREATED_VS_IFNG_STIM_MACROPHAGE_UP	GSE35825_UNTREATED_VS_IFNG_STIM_MACROPHAGE_UP		153	-0.378352	-1.58512	0.00235294	0.0591593	1	1797	tags=27%, list=16%, signal=32%
GO_REGULATION_OF_PRODUCTION_OF_MOLECULAR_MEDIATOR_OF_IMMUNE_RESPONSE	GO_REGULATION_OF_PRODUCTION_OF_MOLECULAR_MEDIATOR_OF_IMMUNE_RESPONSE		64	-0.440783	-1.58475	0.00678733	0.0593109	1	2548	tags=44%, list=22%, signal=56%
ZHAN_V1_LATE_DIFFERENTIATION_GENES_UP	ZHAN_V1_LATE_DIFFERENTIATION_GENES_UP		27	-0.518523	-1.58443	0.0292887	0.0594259	1	1845	tags=41%, list=16%, signal=48%
KEGG_JAK_STAT_SIGNALING_PATHWAY	KEGG_JAK_STAT_SIGNALING_PATHWAY		96	-0.40436	-1.58434	0.00230415	0.0594267	1	2810	tags=39%, list=24%, signal=50%
ODONNELL_TARGETS_OF_MYC_AND_TFRC_UP	ODONNELL_TARGETS_OF_MYC_AND_TFRC_UP		66	-0.436423	-1.58382	0.00218341	0.0596362	1	1124	tags=33%, list=10%, signal=37%
JOHNSTONE_PARVB_TARGETS_2_UP	JOHNSTONE_PARVB_TARGETS_2_UP		110	-0.406815	-1.58332	0.00444444	0.0598326	1	1860	tags=29%, list=16%, signal=34%
GO_FATTY_ACID_TRANSPORT	GO_FATTY_ACID_TRANSPORT		34	-0.49612	-1.58259	0.0184426	0.0601378	1	3124	tags=47%, list=27%, signal=64%
GO_CELLULAR_TRANSITION_METAL_ION_HOMEOSTASIS	GO_CELLULAR_TRANSITION_METAL_ION_HOMEOSTASIS		44	-0.469576	-1.58248	0.0224215	0.0601591	1	736	tags=16%, list=6%, signal=17%
GO_REGULATION_OF_B_CELL_PROLIFERATION	GO_REGULATION_OF_B_CELL_PROLIFERATION		43	-0.472213	-1.58229	0.0108696	0.0602151	1	2093	tags=42%, list=18%, signal=51%
GSE19198_1H_VS_6H_IL21_TREATED_TCELL_DN	GSE19198_1H_VS_6H_IL21_TREATED_TCELL_DN		155	-0.375182	-1.58142	0	0.0606233	1	2095	tags=31%, list=18%, signal=37%
GSE6269_HEALTHY_VS_STAPH_PNEUMO_INF_PBMC_DN	GSE6269_HEALTHY_VS_STAPH_PNEUMO_INF_PBMC_DN		114	-0.398099	-1.58063	0.0046729	0.06097	1	1917	tags=29%, list=17%, signal=34%
MODULE_358	MODULE_358		67	-0.434808	-1.58003	0.00458716	0.0612204	1	1829	tags=37%, list=16%, signal=44%
GO_PROTEIN_SECRETION	GO_PROTEIN_SECRETION		59	-0.439434	-1.57947	0.0127389	0.0614372	1	2371	tags=41%, list=20%, signal=51%
GO_TRANSFERASE_ACTIVITY_TRANSFERRING_GLYCOSYL_GROUPS	GO_TRANSFERASE_ACTIVITY_TRANSFERRING_GLYCOSYL_GROUPS		173	-0.374252	-1.57941	0.00223714	0.061422	1	1545	tags=23%, list=13%, signal=26%
GSE19198_CTRL_VS_IL21_TREATED_TCELL_24H_UP	GSE19198_CTRL_VS_IL21_TREATED_TCELL_24H_UP		152	-0.385816	-1.57937	0	0.0613935	1	1192	tags=24%, list=10%, signal=26%
WANG_RESPONSE_TO_GSK3_INHIBITOR_SB216763_UP	WANG_RESPONSE_TO_GSK3_INHIBITOR_SB216763_UP		285	-0.349973	-1.57922	0	0.0614426	1	1802	tags=27%, list=16%, signal=31%
GSE21033_3H_VS_12H_POLYIC_STIM_DC_DN	GSE21033_3H_VS_12H_POLYIC_STIM_DC_DN		62	-0.440312	-1.57918	0.0133929	0.0614227	1	983	tags=16%, list=8%, signal=18%
NFKB_Q6	NFKB_Q6		169	-0.37578	-1.57912	0	0.0614067	1	2448	tags=34%, list=21%, signal=42%
GSE4535_BM_DERIVED_DC_VS_FOLLICULAR_DC_UP	GSE4535_BM_DERIVED_DC_VS_FOLLICULAR_DC_UP		153	-0.384184	-1.57886	0.00222717	0.0614847	1	1847	tags=25%, list=16%, signal=30%
YAO_TEMPORAL_RESPONSE_TO_PROGESTERONE_CLUSTER_9	YAO_TEMPORAL_RESPONSE_TO_PROGESTERONE_CLUSTER_9		58	-0.443655	-1.57879	0.00904977	0.0614724	1	608	tags=22%, list=5%, signal=24%
GO_CATION_TRANSPORT	GO_CATION_TRANSPORT		379	-0.342247	-1.57865	0	0.0615129	1	1799	tags=24%, list=16%, signal=27%
SARTIPY_BLUNTED_BY_INSULIN_RESISTANCE_UP	SARTIPY_BLUNTED_BY_INSULIN_RESISTANCE_UP		18	-0.57162	-1.57856	0.0229167	0.0615083	1	1143	tags=28%, list=10%, signal=31%
GSE43955_10H_VS_30H_ACT_CD4_TCELL_WITH_TGFB_IL6_DN	GSE43955_10H_VS_30H_ACT_CD4_TCELL_WITH_TGFB_IL6_DN		117	-0.389782	-1.57846	0.00469484	0.0615199	1	1805	tags=29%, list=16%, signal=34%
GO_ANTIGEN_PROCESSING_AND_PRESENTATION	GO_ANTIGEN_PROCESSING_AND_PRESENTATION		172	-0.372913	-1.57809	0.00243902	0.0616669	1	1132	tags=20%, list=10%, signal=22%
GSE22196_HEALTHY_VS_OBESE_MOUSE_SKIN_GAMMADELTA_TCELL_DN	GSE22196_HEALTHY_VS_OBESE_MOUSE_SKIN_GAMMADELTA_TCELL_DN		171	-0.377644	-1.57776	0.00746269	0.0617984	1	2277	tags=33%, list=20%, signal=41%
GSE21379_WT_VS_SAP_KO_TFH_CD4_TCELL_DN	GSE21379_WT_VS_SAP_KO_TFH_CD4_TCELL_DN		130	-0.383787	-1.57776	0	0.0617565	1	1505	tags=22%, list=13%, signal=25%
GO_CELLULAR_DEFENSE_RESPONSE	GO_CELLULAR_DEFENSE_RESPONSE		32	-0.489196	-1.57773	0.0217391	0.0617252	1	2381	tags=28%, list=21%, signal=35%
PHONG_TNF_RESPONSE_VIA_P38_PARTIAL	PHONG_TNF_RESPONSE_VIA_P38_PARTIAL		126	-0.38739	-1.57766	0.00220264	0.0617214	1	1651	tags=28%, list=14%, signal=32%
PID_RXR_VDR_PATHWAY	PID_RXR_VDR_PATHWAY		18	-0.56625	-1.57748	0.0440835	0.061768	1	431	tags=22%, list=4%, signal=23%
MUNSHI_MULTIPLE_MYELOMA_UP	MUNSHI_MULTIPLE_MYELOMA_UP		66	-0.429954	-1.57744	0.00890869	0.0617452	1	2524	tags=42%, list=22%, signal=54%
BIOCARTA_BCELLSURVIVAL_PATHWAY	BIOCARTA_BCELLSURVIVAL_PATHWAY		16	-0.589071	-1.57738	0.0295455	0.06173	1	972	tags=25%, list=8%, signal=27%
GSE9601_UNTREATED_VS_NFKB_INHIBITOR_TREATED_HCMV_INF_MONOCYTE_UP	GSE9601_UNTREATED_VS_NFKB_INHIBITOR_TREATED_HCMV_INF_MONOCYTE_UP		86	-0.416168	-1.5773	0	0.0617225	1	1332	tags=26%, list=12%, signal=29%
GO_NAD_ADP_RIBOSYLTRANSFERASE_ACTIVITY	GO_NAD_ADP_RIBOSYLTRANSFERASE_ACTIVITY		22	-0.537137	-1.57729	0.0280374	0.0616809	1	775	tags=27%, list=7%, signal=29%
GSE30153_LUPUS_VS_HEALTHY_DONOR_BCELL_DN	GSE30153_LUPUS_VS_HEALTHY_DONOR_BCELL_DN		100	-0.400056	-1.57707	0.00458716	0.0617518	1	1019	tags=18%, list=9%, signal=20%
GO_N_GLYCAN_PROCESSING	GO_N_GLYCAN_PROCESSING		15	-0.595471	-1.57697	0.0289256	0.0617641	1	1858	tags=47%, list=16%, signal=56%
GO_REGULATION_OF_CELLULAR_AMINE_METABOLIC_PROCESS	GO_REGULATION_OF_CELLULAR_AMINE_METABOLIC_PROCESS		65	-0.435918	-1.57691	0.0113636	0.061749	1	1993	tags=29%, list=17%, signal=35%
GO_NEURON_PROJECTION_GUIDANCE	GO_NEURON_PROJECTION_GUIDANCE		84	-0.415595	-1.57583	0.00218341	0.0622533	1	2484	tags=38%, list=21%, signal=48%
GO_O_GLYCAN_PROCESSING	GO_O_GLYCAN_PROCESSING		27	-0.528979	-1.57507	0.0320513	0.0626039	1	1050	tags=30%, list=9%, signal=33%
GSE7509_DC_VS_MONOCYTE_DN	GSE7509_DC_VS_MONOCYTE_DN		149	-0.382748	-1.57492	0.0022173	0.0626495	1	1412	tags=23%, list=12%, signal=26%
GO_REGULATION_OF_INTERLEUKIN_6_PRODUCTION	GO_REGULATION_OF_INTERLEUKIN_6_PRODUCTION		67	-0.438276	-1.57476	0.0136054	0.0626989	1	889	tags=25%, list=8%, signal=27%
GSE9037_CTRL_VS_LPS_1H_STIM_IRAK4_KO_BMDM_DN	GSE9037_CTRL_VS_LPS_1H_STIM_IRAK4_KO_BMDM_DN		135	-0.386883	-1.57392	0.00224215	0.0631127	1	1693	tags=24%, list=15%, signal=28%
GSE21927_EL4_VS_MCA203_TUMOR_MONOCYTES_UP	GSE21927_EL4_VS_MCA203_TUMOR_MONOCYTES_UP		77	-0.419992	-1.57349	0.0021692	0.0632887	1	2209	tags=39%, list=19%, signal=48%
SCIBETTA_KDM5B_TARGETS_UP	SCIBETTA_KDM5B_TARGETS_UP		17	-0.574189	-1.57344	0.033195	0.0632659	1	1036	tags=24%, list=9%, signal=26%
MODULE_38	MODULE_38		259	-0.353117	-1.57334	0	0.0632554	1	2002	tags=25%, list=17%, signal=30%
GO_ATPASE_ACTIVITY_COUPLED_TO_MOVEMENT_OF_SUBSTANCES	GO_ATPASE_ACTIVITY_COUPLED_TO_MOVEMENT_OF_SUBSTANCES		74	-0.424672	-1.57332	0.0090703	0.0632215	1	1560	tags=27%, list=13%, signal=31%
GSE33425_CD8_ALPHAALPHA_VS_ALPHABETA_CD161_HIGH_TCELL_UP	GSE33425_CD8_ALPHAALPHA_VS_ALPHABETA_CD161_HIGH_TCELL_UP		161	-0.379905	-1.57312	0	0.0632721	1	2233	tags=32%, list=19%, signal=39%
MIKKELSEN_MEF_LCP_WITH_H3K4ME3	MIKKELSEN_MEF_LCP_WITH_H3K4ME3		59	-0.442811	-1.57311	0.00932401	0.0632288	1	2002	tags=36%, list=17%, signal=43%
BURTON_ADIPOGENESIS_9	BURTON_ADIPOGENESIS_9		68	-0.430961	-1.57305	0.00220264	0.0632137	1	825	tags=19%, list=7%, signal=20%
GSE22886_IGM_MEMORY_BCELL_VS_BM_PLASMA_CELL_DN	GSE22886_IGM_MEMORY_BCELL_VS_BM_PLASMA_CELL_DN		154	-0.377694	-1.57301	0.00226757	0.0631799	1	1545	tags=26%, list=13%, signal=30%
ONDER_CDH1_TARGETS_3_DN	ONDER_CDH1_TARGETS_3_DN		17	-0.581155	-1.5727	0.0314465	0.0633167	1	380	tags=35%, list=3%, signal=36%
GSE17974_0H_VS_24H_IN_VITRO_ACT_CD4_TCELL_UP	GSE17974_0H_VS_24H_IN_VITRO_ACT_CD4_TCELL_UP		131	-0.387157	-1.57268	0.00647948	0.0632904	1	2447	tags=35%, list=21%, signal=44%
GSE22886_NAIVE_CD8_TCELL_VS_DC_DN	GSE22886_NAIVE_CD8_TCELL_VS_DC_DN		184	-0.36341	-1.57267	0.0023753	0.063251	1	1836	tags=27%, list=16%, signal=31%
GO_REGULATION_OF_NEUROTRANSMITTER_SECRETION	GO_REGULATION_OF_NEUROTRANSMITTER_SECRETION		27	-0.514583	-1.57255	0.01566	0.0632752	1	866	tags=26%, list=7%, signal=28%
GSE46606_IRF4_KO_VS_WT_UNSTIM_BCELL_DN	GSE46606_IRF4_KO_VS_WT_UNSTIM_BCELL_DN		121	-0.393282	-1.57251	0.0070922	0.0632573	1	1835	tags=30%, list=16%, signal=35%
VERRECCHIA_EARLY_RESPONSE_TO_TGFB1	VERRECCHIA_EARLY_RESPONSE_TO_TGFB1		33	-0.49543	-1.57244	0.0130719	0.0632489	1	1270	tags=24%, list=11%, signal=27%
PASINI_SUZ12_TARGETS_DN	PASINI_SUZ12_TARGETS_DN		223	-0.359257	-1.57224	0	0.0633234	1	2004	tags=26%, list=17%, signal=31%
GSE34156_UNTREATED_VS_24H_NOD2_LIGAND_TREATED_MONOCYTE_DN	GSE34156_UNTREATED_VS_24H_NOD2_LIGAND_TREATED_MONOCYTE_DN		148	-0.38273	-1.5717	0.00218341	0.0635413	1	1288	tags=24%, list=11%, signal=26%
ZWANG_CLASS_2_TRANSIENTLY_INDUCED_BY_EGF	ZWANG_CLASS_2_TRANSIENTLY_INDUCED_BY_EGF		23	-0.53944	-1.57149	0.0233645	0.0635969	1	1243	tags=30%, list=11%, signal=34%
GO_KIDNEY_EPITHELIUM_DEVELOPMENT	GO_KIDNEY_EPITHELIUM_DEVELOPMENT		53	-0.449107	-1.5714	0.0215517	0.0636096	1	2532	tags=40%, list=22%, signal=50%
GSE41176_UNSTIM_VS_ANTI_IGM_STIM_BCELL_1H_DN	GSE41176_UNSTIM_VS_ANTI_IGM_STIM_BCELL_1H_DN		169	-0.367604	-1.57137	0	0.0635749	1	1486	tags=25%, list=13%, signal=29%
GSE360_CTRL_VS_L_DONOVANI_DC_DN	GSE360_CTRL_VS_L_DONOVANI_DC_DN		119	-0.391722	-1.57118	0.00227273	0.0636414	1	972	tags=18%, list=8%, signal=19%
REACTOME_GROWTH_HORMONE_RECEPTOR_SIGNALING	REACTOME_GROWTH_HORMONE_RECEPTOR_SIGNALING		19	-0.570465	-1.571	0.0371901	0.0637032	1	2995	tags=42%, list=26%, signal=57%
GO_NEGATIVE_REGULATION_OF_CYTOKINE_SECRETION	GO_NEGATIVE_REGULATION_OF_CYTOKINE_SECRETION		26	-0.522684	-1.57056	0.0262009	0.063879	1	1437	tags=42%, list=12%, signal=48%
GSE21360_NAIVE_VS_SECONDARY_MEMORY_CD8_TCELL_UP	GSE21360_NAIVE_VS_SECONDARY_MEMORY_CD8_TCELL_UP		136	-0.38486	-1.57054	0.00226244	0.0638479	1	2204	tags=34%, list=19%, signal=41%
GO_PHAGOCYTIC_VESICLE	GO_PHAGOCYTIC_VESICLE		74	-0.423607	-1.56994	0.00217865	0.0640866	1	1661	tags=28%, list=14%, signal=33%
GO_CELLULAR_RESPONSE_TO_VASCULAR_ENDOTHELIAL_GROWTH_FACTOR_STIMULUS	GO_CELLULAR_RESPONSE_TO_VASCULAR_ENDOTHELIAL_GROWTH_FACTOR_STIMULUS		16	-0.595572	-1.56966	0.0428571	0.0641784	1	1384	tags=31%, list=12%, signal=35%
GSE6259_DEC205_POS_DC_VS_BCELL_DN	GSE6259_DEC205_POS_DC_VS_BCELL_DN		145	-0.376219	-1.56932	0	0.0642998	1	1279	tags=24%, list=11%, signal=27%
BRUINS_UVC_RESPONSE_VIA_TP53_GROUP_A	BRUINS_UVC_RESPONSE_VIA_TP53_GROUP_A		446	-0.33556	-1.56908	0	0.0643757	1	2264	tags=28%, list=20%, signal=34%
GO_FATTY_ACID_DERIVATIVE_METABOLIC_PROCESS	GO_FATTY_ACID_DERIVATIVE_METABOLIC_PROCESS		41	-0.478466	-1.569	0.0152838	0.0643664	1	2201	tags=44%, list=19%, signal=54%
GO_NEGATIVE_REGULATION_OF_CELL_CELL_ADHESION	GO_NEGATIVE_REGULATION_OF_CELL_CELL_ADHESION		94	-0.400576	-1.56822	0.00213675	0.064697	1	2479	tags=40%, list=21%, signal=51%
STARK_HYPPOCAMPUS_22Q11_DELETION_UP	STARK_HYPPOCAMPUS_22Q11_DELETION_UP		36	-0.492212	-1.56811	0.0212314	0.0647226	1	1533	tags=33%, list=13%, signal=38%
GSE5589_LPS_VS_LPS_AND_IL6_STIM_IL6_KO_MACROPHAGE_45MIN_UP	GSE5589_LPS_VS_LPS_AND_IL6_STIM_IL6_KO_MACROPHAGE_45MIN_UP		146	-0.380475	-1.56781	0	0.0648231	1	1891	tags=30%, list=16%, signal=36%
GSE7852_TREG_VS_TCONV_THYMUS_DN	GSE7852_TREG_VS_TCONV_THYMUS_DN		123	-0.38949	-1.56765	0.00223214	0.064857	1	941	tags=16%, list=8%, signal=18%
GO_RESPONSE_TO_BACTERIUM	GO_RESPONSE_TO_BACTERIUM		275	-0.352855	-1.56747	0	0.0649065	1	1384	tags=23%, list=12%, signal=25%
GSE39152_CD103_NEG_VS_POS_MEMORY_CD8_TCELL_UP	GSE39152_CD103_NEG_VS_POS_MEMORY_CD8_TCELL_UP		147	-0.379355	-1.56708	0.00230415	0.0650517	1	2061	tags=33%, list=18%, signal=40%
GSE27670_BLIMP1_VS_LMP1_TRANSDUCED_GC_BCELL_UP	GSE27670_BLIMP1_VS_LMP1_TRANSDUCED_GC_BCELL_UP		133	-0.383957	-1.56688	0.00242131	0.0651028	1	1682	tags=26%, list=15%, signal=30%
HSF2_01	HSF2_01		136	-0.374999	-1.56683	0	0.0650877	1	2482	tags=36%, list=21%, signal=45%
GO_REGULATION_OF_CALCIUM_ION_TRANSMEMBRANE_TRANSPORT	GO_REGULATION_OF_CALCIUM_ION_TRANSMEMBRANE_TRANSPORT		62	-0.439374	-1.5667	0.0178174	0.0651002	1	2381	tags=40%, list=21%, signal=50%
GO_REGULATION_OF_CELL_ADHESION	GO_REGULATION_OF_CELL_ADHESION		405	-0.336816	-1.56661	0	0.0651199	1	1771	tags=22%, list=15%, signal=26%
WINTER_HYPOXIA_DN	WINTER_HYPOXIA_DN		41	-0.4745	-1.56655	0.0112867	0.0651012	1	1878	tags=34%, list=16%, signal=41%
GSE42724_MEMORY_BCELL_VS_PLASMABLAST_UP	GSE42724_MEMORY_BCELL_VS_PLASMABLAST_UP		166	-0.373221	-1.56654	0	0.0650659	1	1962	tags=31%, list=17%, signal=36%
GSE3400_UNTREATED_VS_IFNB_TREATED_MEF_DN	GSE3400_UNTREATED_VS_IFNB_TREATED_MEF_DN		93	-0.407273	-1.56633	0.0043573	0.0651369	1	1437	tags=24%, list=12%, signal=27%
GSE22140_GERMFREE_VS_SPF_MOUSE_CD4_TCELL_DN	GSE22140_GERMFREE_VS_SPF_MOUSE_CD4_TCELL_DN		163	-0.377331	-1.56629	0.00230947	0.0651173	1	1605	tags=23%, list=14%, signal=27%
RHEIN_ALL_GLUCOCORTICOID_THERAPY_UP	RHEIN_ALL_GLUCOCORTICOID_THERAPY_UP		62	-0.434998	-1.56628	0.0182648	0.0650766	1	1787	tags=39%, list=15%, signal=46%
GSE24210_IL35_TREATED_VS_RESTING_TREG_UP	GSE24210_IL35_TREATED_VS_RESTING_TREG_UP		101	-0.404876	-1.56596	0.00649351	0.0652069	1	1451	tags=25%, list=13%, signal=28%
ZHOU_INFLAMMATORY_RESPONSE_FIMA_UP	ZHOU_INFLAMMATORY_RESPONSE_FIMA_UP		248	-0.353381	-1.56589	0	0.0652131	1	1950	tags=28%, list=17%, signal=33%
GSE43955_TH0_VS_TGFB_IL6_TH17_ACT_CD4_TCELL_52H_UP	GSE43955_TH0_VS_TGFB_IL6_TH17_ACT_CD4_TCELL_52H_UP		127	-0.388105	-1.56581	0.0046083	0.0652007	1	2180	tags=35%, list=19%, signal=42%
GO_HUMORAL_IMMUNE_RESPONSE	GO_HUMORAL_IMMUNE_RESPONSE		74	-0.420892	-1.5652	0.012766	0.0655015	1	946	tags=23%, list=8%, signal=25%
LXR_Q3	LXR_Q3		48	-0.447184	-1.56496	0.0158014	0.0655928	1	2521	tags=38%, list=22%, signal=48%
GSE40274_XBP1_VS_FOXP3_AND_XBP1_TRANSDUCED_ACTIVATED_CD4_TCELL_UP	GSE40274_XBP1_VS_FOXP3_AND_XBP1_TRANSDUCED_ACTIVATED_CD4_TCELL_UP		164	-0.371026	-1.56476	0	0.0656679	1	1925	tags=25%, list=17%, signal=30%
GO_REGULATION_OF_CELL_ACTIVATION	GO_REGULATION_OF_CELL_ACTIVATION		316	-0.34651	-1.5647	0.0026178	0.0656471	1	2246	tags=30%, list=19%, signal=36%
GO_SARCOPLASM	GO_SARCOPLASM		34	-0.490027	-1.56459	0.0308642	0.0656672	1	2858	tags=47%, list=25%, signal=62%
MODULE_263	MODULE_263		20	-0.570706	-1.56408	0.0413943	0.0658639	1	1167	tags=35%, list=10%, signal=39%
RIZ_ERYTHROID_DIFFERENTIATION_HEMGN	RIZ_ERYTHROID_DIFFERENTIATION_HEMGN		17	-0.584269	-1.56381	0.0363636	0.0659666	1	17	tags=12%, list=0%, signal=12%
GSE22432_PDC_VS_TGFB1_TREATEDCOMMON_DC_PROGENITOR_DN	GSE22432_PDC_VS_TGFB1_TREATEDCOMMON_DC_PROGENITOR_DN		163	-0.3724	-1.56373	0	0.0659593	1	1471	tags=22%, list=13%, signal=25%
GO_NEGATIVE_REGULATION_OF_CALCIUM_ION_TRANSMEMBRANE_TRANSPORT	GO_NEGATIVE_REGULATION_OF_CALCIUM_ION_TRANSMEMBRANE_TRANSPORT		15	-0.589291	-1.56343	0.0429448	0.0660816	1	2905	tags=53%, list=25%, signal=71%
MODULE_119	MODULE_119		110	-0.394445	-1.56325	0.00457666	0.0661397	1	1915	tags=26%, list=17%, signal=31%
GO_ENDOTHELIAL_CELL_MIGRATION	GO_ENDOTHELIAL_CELL_MIGRATION		30	-0.511557	-1.5632	0.0280778	0.0661169	1	1016	tags=27%, list=9%, signal=29%
GSE19401_RETINOIC_ACID_VS_RETINOIC_ACID_AND_PAM2CSK4_STIM_FOLLICULAR_DC_UP	GSE19401_RETINOIC_ACID_VS_RETINOIC_ACID_AND_PAM2CSK4_STIM_FOLLICULAR_DC_UP		120	-0.387762	-1.56281	0.00641026	0.0662796	1	2084	tags=30%, list=18%, signal=36%
ESC_J1_UP_EARLY.V1_DN	ESC_J1_UP_EARLY.V1_DN		122	-0.38395	-1.56237	0.0021097	0.0664666	1	711	tags=12%, list=6%, signal=13%
GO_RESPONSE_TO_PH	GO_RESPONSE_TO_PH		16	-0.59194	-1.56225	0.0487288	0.0664862	1	1372	tags=38%, list=12%, signal=42%
GSE34515_CD16_NEG_MONOCYTE_VS_DC_UP	GSE34515_CD16_NEG_MONOCYTE_VS_DC_UP		149	-0.370239	-1.56199	0.00218341	0.0665788	1	1802	tags=26%, list=16%, signal=31%
GSE39152_CD103_NEG_VS_POS_MEMORY_CD8_TCELL_DN	GSE39152_CD103_NEG_VS_POS_MEMORY_CD8_TCELL_DN		152	-0.376301	-1.56188	0	0.0665901	1	1534	tags=20%, list=13%, signal=23%
GSE14350_IL2RB_KO_VS_WT_TEFF_UP	GSE14350_IL2RB_KO_VS_WT_TEFF_UP		140	-0.377393	-1.56143	0	0.0667971	1	1363	tags=20%, list=12%, signal=22%
GO_POSITIVE_REGULATION_OF_INTERLEUKIN_6_PRODUCTION	GO_POSITIVE_REGULATION_OF_INTERLEUKIN_6_PRODUCTION		42	-0.466415	-1.56135	0.0229885	0.0667992	1	889	tags=26%, list=8%, signal=28%
GO_REGULATION_OF_CHEMOTAXIS	GO_REGULATION_OF_CHEMOTAXIS		91	-0.407404	-1.56121	0.00456621	0.0668312	1	1133	tags=20%, list=10%, signal=22%
GSE13484_UNSTIM_VS_12H_YF17D_VACCINE_STIM_PBMC_DN	GSE13484_UNSTIM_VS_12H_YF17D_VACCINE_STIM_PBMC_DN		166	-0.373602	-1.56102	0.00655022	0.0669117	1	1671	tags=27%, list=14%, signal=31%
PACHER_TARGETS_OF_IGF1_AND_IGF2_UP	PACHER_TARGETS_OF_IGF1_AND_IGF2_UP		28	-0.514151	-1.56088	0.0396476	0.0669562	1	1413	tags=39%, list=12%, signal=45%
GSE7852_THYMUS_VS_FAT_TCONV_DN	GSE7852_THYMUS_VS_FAT_TCONV_DN		153	-0.378635	-1.56031	0.00222222	0.0672371	1	1783	tags=27%, list=15%, signal=31%
MODULE_324	MODULE_324		55	-0.446443	-1.56009	0.0157303	0.067309	1	1843	tags=35%, list=16%, signal=41%
GO_PROTEIN_TYROSINE_KINASE_ACTIVITY	GO_PROTEIN_TYROSINE_KINASE_ACTIVITY		99	-0.39604	-1.56005	0.00228833	0.0672874	1	2643	tags=38%, list=23%, signal=49%
GSE10094_LCMV_VS_LISTERIA_IND_EFF_CD4_TCELL_DN	GSE10094_LCMV_VS_LISTERIA_IND_EFF_CD4_TCELL_DN		88	-0.405289	-1.55995	0.00689655	0.0672945	1	1296	tags=19%, list=11%, signal=22%
GSE40274_FOXP3_VS_FOXP3_AND_PBX1_TRANSDUCED_ACTIVATED_CD4_TCELL_UP	GSE40274_FOXP3_VS_FOXP3_AND_PBX1_TRANSDUCED_ACTIVATED_CD4_TCELL_UP		150	-0.373913	-1.55973	0.00473934	0.06736	1	1915	tags=27%, list=17%, signal=32%
GSE22601_DOUBLE_POSITIVE_VS_CD8_SINGLE_POSITIVE_THYMOCYTE_UP	GSE22601_DOUBLE_POSITIVE_VS_CD8_SINGLE_POSITIVE_THYMOCYTE_UP		168	-0.367953	-1.55957	0.00717703	0.0674119	1	2058	tags=27%, list=18%, signal=32%
GSE1925_CTRL_VS_3H_IFNG_STIM_MACROPHAGE_UP	GSE1925_CTRL_VS_3H_IFNG_STIM_MACROPHAGE_UP		169	-0.369621	-1.55936	0.00229358	0.0674889	1	1511	tags=23%, list=13%, signal=26%
TCCAGAG_MIR518C	TCCAGAG_MIR518C		80	-0.413262	-1.55888	0.00464037	0.0677323	1	844	tags=20%, list=7%, signal=21%
GSE17974_IL4_AND_ANTI_IL12_VS_UNTREATED_0.5H_ACT_CD4_TCELL_DN	GSE17974_IL4_AND_ANTI_IL12_VS_UNTREATED_0.5H_ACT_CD4_TCELL_DN		46	-0.465236	-1.55886	0.0151188	0.0676935	1	1432	tags=22%, list=12%, signal=25%
BIOCARTA_GLEEVEC_PATHWAY	BIOCARTA_GLEEVEC_PATHWAY		23	-0.537602	-1.55885	0.0350877	0.067653	1	2371	tags=35%, list=20%, signal=44%
GO_POSITIVE_REGULATION_OF_CHEMOTAXIS	GO_POSITIVE_REGULATION_OF_CHEMOTAXIS		62	-0.430567	-1.55879	0.0115473	0.067658	1	2453	tags=34%, list=21%, signal=43%
CEBPB_01	CEBPB_01		149	-0.375145	-1.55849	0	0.0677793	1	2276	tags=28%, list=20%, signal=35%
GSE7764_IL15_TREATED_VS_CTRL_NK_CELL_24H_DN	GSE7764_IL15_TREATED_VS_CTRL_NK_CELL_24H_DN		117	-0.386092	-1.55837	0.00428265	0.0677852	1	1692	tags=25%, list=15%, signal=29%
GO_POSITIVE_REGULATION_OF_LEUKOCYTE_MIGRATION	GO_POSITIVE_REGULATION_OF_LEUKOCYTE_MIGRATION		61	-0.440034	-1.55821	0.00917431	0.0678161	1	1133	tags=20%, list=10%, signal=22%
GSE7852_TREG_VS_TCONV_FAT_UP	GSE7852_TREG_VS_TCONV_FAT_UP		149	-0.369005	-1.55807	0.00240964	0.0678495	1	1723	tags=26%, list=15%, signal=30%
GSE24634_TEFF_VS_TCONV_DAY5_IN_CULTURE_DN	GSE24634_TEFF_VS_TCONV_DAY5_IN_CULTURE_DN		169	-0.366403	-1.55773	0.00235849	0.0679759	1	1131	tags=22%, list=10%, signal=24%
GSE411_UNSTIM_VS_100MIN_IL6_STIM_MACROPHAGE_UP	GSE411_UNSTIM_VS_100MIN_IL6_STIM_MACROPHAGE_UP		159	-0.370506	-1.55767	0.00451467	0.0679674	1	1834	tags=28%, list=16%, signal=33%
MODULE_366	MODULE_366		19	-0.553344	-1.55723	0.0455531	0.0681649	1	2923	tags=47%, list=25%, signal=63%
MODULE_121	MODULE_121		58	-0.442263	-1.55708	0.00663717	0.068206	1	2193	tags=40%, list=19%, signal=49%
HALLMARK_IL2_STAT5_SIGNALING	HALLMARK_IL2_STAT5_SIGNALING		163	-0.371456	-1.55706	0.00465116	0.0681717	1	2251	tags=32%, list=19%, signal=39%
GSE12392_CD8A_POS_VS_NEG_SPLEEN_IFNB_KO_DC_DN	GSE12392_CD8A_POS_VS_NEG_SPLEEN_IFNB_KO_DC_DN		155	-0.374221	-1.55675	0.00439561	0.0683026	1	1899	tags=25%, list=16%, signal=29%
IRF1_Q6	IRF1_Q6		161	-0.374123	-1.55665	0	0.0683002	1	1831	tags=25%, list=16%, signal=29%
GSE45365_HEALTHY_VS_MCMV_INFECTION_CD8A_DC_IFNAR_KO_DN	GSE45365_HEALTHY_VS_MCMV_INFECTION_CD8A_DC_IFNAR_KO_DN		162	-0.365856	-1.55647	0.00212766	0.0683393	1	1797	tags=27%, list=16%, signal=32%
GSE360_L_DONOVANI_VS_B_MALAYI_LOW_DOSE_DC_UP	GSE360_L_DONOVANI_VS_B_MALAYI_LOW_DOSE_DC_UP		127	-0.384145	-1.55627	0	0.0683892	1	2015	tags=23%, list=17%, signal=27%
GSE25123_IL4_VS_IL4_AND_ROSIGLITAZONE_STIM_MACROPHAGE_DAY10_UP	GSE25123_IL4_VS_IL4_AND_ROSIGLITAZONE_STIM_MACROPHAGE_DAY10_UP		144	-0.380616	-1.55624	0.00469484	0.0683575	1	1547	tags=24%, list=13%, signal=28%
GSE26928_NAIVE_VS_EFF_MEMORY_CD4_TCELL_DN	GSE26928_NAIVE_VS_EFF_MEMORY_CD4_TCELL_DN		142	-0.379602	-1.55611	0	0.0683736	1	1414	tags=25%, list=12%, signal=29%
GO_REGULATION_OF_TRANSMEMBRANE_TRANSPORT	GO_REGULATION_OF_TRANSMEMBRANE_TRANSPORT		180	-0.365134	-1.55599	0	0.0683826	1	2027	tags=26%, list=18%, signal=30%
UEDA_CENTRAL_CLOCK	UEDA_CENTRAL_CLOCK		68	-0.428411	-1.55562	0.00909091	0.0685348	1	1195	tags=24%, list=10%, signal=26%
GO_EXTERNAL_SIDE_OF_PLASMA_MEMBRANE	GO_EXTERNAL_SIDE_OF_PLASMA_MEMBRANE		118	-0.389727	-1.55562	0.0046729	0.0684907	1	1998	tags=29%, list=17%, signal=34%
GSE22886_DAY0_VS_DAY7_MONOCYTE_IN_CULTURE_UP	GSE22886_DAY0_VS_DAY7_MONOCYTE_IN_CULTURE_UP		162	-0.375377	-1.55548	0	0.0685279	1	1173	tags=21%, list=10%, signal=23%
KOKKINAKIS_METHIONINE_DEPRIVATION_48HR_DN	KOKKINAKIS_METHIONINE_DEPRIVATION_48HR_DN		55	-0.440814	-1.55525	0.00442478	0.0686108	1	850	tags=20%, list=7%, signal=21%
GO_PROTEIN_SERINE_THREONINE_KINASE_INHIBITOR_ACTIVITY	GO_PROTEIN_SERINE_THREONINE_KINASE_INHIBITOR_ACTIVITY		25	-0.526729	-1.55487	0.0402542	0.0687601	1	928	tags=24%, list=8%, signal=26%
GSE22935_WT_VS_MYD88_KO_MACROPHAGE_12H_MBOVIS_BCG_STIM_DN	GSE22935_WT_VS_MYD88_KO_MACROPHAGE_12H_MBOVIS_BCG_STIM_DN		137	-0.381708	-1.5546	0	0.0688606	1	1294	tags=23%, list=11%, signal=25%
GCNP_SHH_UP_EARLY.V1_DN	GCNP_SHH_UP_EARLY.V1_DN		97	-0.398506	-1.55451	0.0113895	0.0688542	1	2024	tags=27%, list=17%, signal=32%
GO_NEGATIVE_REGULATION_OF_ION_TRANSPORT	GO_NEGATIVE_REGULATION_OF_ION_TRANSPORT		59	-0.438771	-1.5545	0.0226244	0.0688179	1	2555	tags=37%, list=22%, signal=48%
GO_RETINA_MORPHOGENESIS_IN_CAMERA_TYPE_EYE	GO_RETINA_MORPHOGENESIS_IN_CAMERA_TYPE_EYE		16	-0.581695	-1.55434	0.0235546	0.0688688	1	170	tags=13%, list=1%, signal=13%
GO_ESTABLISHMENT_OF_PROTEIN_LOCALIZATION_TO_PLASMA_MEMBRANE	GO_ESTABLISHMENT_OF_PROTEIN_LOCALIZATION_TO_PLASMA_MEMBRANE		70	-0.428219	-1.55426	0.0138889	0.0688607	1	1709	tags=30%, list=15%, signal=35%
GO_RESPONSE_TO_STARVATION	GO_RESPONSE_TO_STARVATION		106	-0.391277	-1.55414	0.00236407	0.0688816	1	2384	tags=31%, list=21%, signal=39%
GO_NEGATIVE_REGULATION_OF_LEUKOCYTE_MEDIATED_IMMUNITY	GO_NEGATIVE_REGULATION_OF_LEUKOCYTE_MEDIATED_IMMUNITY		33	-0.492535	-1.55396	0.0226757	0.0689322	1	1025	tags=27%, list=9%, signal=30%
GSE17721_PAM3CSK4_VS_GADIQUIMOD_8H_BMDC_DN	GSE17721_PAM3CSK4_VS_GADIQUIMOD_8H_BMDC_DN		154	-0.371517	-1.55385	0.00229885	0.0689469	1	1395	tags=18%, list=12%, signal=20%
GO_SINGLE_ORGANISM_CELL_ADHESION	GO_SINGLE_ORGANISM_CELL_ADHESION		271	-0.350357	-1.55371	0	0.0689826	1	2255	tags=29%, list=19%, signal=35%
GO_TISSUE_MIGRATION	GO_TISSUE_MIGRATION		43	-0.463295	-1.55361	0.021028	0.0689859	1	1016	tags=23%, list=9%, signal=25%
GSE2585_AIRE_KO_VS_WT_CD80_LOW_MTEC_DN	GSE2585_AIRE_KO_VS_WT_CD80_LOW_MTEC_DN		128	-0.392552	-1.55339	0.00448431	0.0690503	1	1809	tags=29%, list=16%, signal=34%
BIOCARTA_IL10_PATHWAY	BIOCARTA_IL10_PATHWAY		17	-0.575832	-1.55329	0.0400802	0.0690709	1	2765	tags=47%, list=24%, signal=62%
CHR8Q21	CHR8Q21		30	-0.501115	-1.55324	0.0343348	0.0690497	1	1471	tags=37%, list=13%, signal=42%
GSE22886_NAIVE_VS_IGG_IGA_MEMORY_BCELL_DN	GSE22886_NAIVE_VS_IGG_IGA_MEMORY_BCELL_DN		178	-0.362683	-1.55287	0.00479616	0.0692033	1	1724	tags=25%, list=15%, signal=29%
GSE37416_0H_VS_3H_F_TULARENSIS_LVS_NEUTROPHIL_DN	GSE37416_0H_VS_3H_F_TULARENSIS_LVS_NEUTROPHIL_DN		161	-0.375017	-1.5524	0	0.0694129	1	2002	tags=34%, list=17%, signal=40%
GO_POSITIVE_REGULATION_OF_GLIOGENESIS	GO_POSITIVE_REGULATION_OF_GLIOGENESIS		29	-0.498644	-1.55233	0.0301724	0.0694035	1	1869	tags=38%, list=16%, signal=45%
GSE45365_NK_CELL_VS_BCELL_DN	GSE45365_NK_CELL_VS_BCELL_DN		73	-0.415866	-1.5519	0.00234192	0.0695802	1	1866	tags=29%, list=16%, signal=34%
GO_RESPONSE_TO_LIPOPROTEIN_PARTICLE	GO_RESPONSE_TO_LIPOPROTEIN_PARTICLE		15	-0.598218	-1.55154	0.0375783	0.0697486	1	1016	tags=33%, list=9%, signal=36%
REACTOME_NEGATIVE_REGULATION_OF_FGFR_SIGNALING	REACTOME_NEGATIVE_REGULATION_OF_FGFR_SIGNALING		22	-0.538073	-1.55116	0.037694	0.0698944	1	1478	tags=27%, list=13%, signal=31%
GO_EAR_MORPHOGENESIS	GO_EAR_MORPHOGENESIS		42	-0.465107	-1.55115	0.0126316	0.0698553	1	2119	tags=26%, list=18%, signal=32%
GSE43700_UNTREATED_VS_IL10_TREATED_PBMC_UP	GSE43700_UNTREATED_VS_IL10_TREATED_PBMC_UP		130	-0.377741	-1.55086	0.00232019	0.0699632	1	1351	tags=18%, list=12%, signal=21%
GO_REGULATION_OF_CALCIUM_ION_IMPORT	GO_REGULATION_OF_CALCIUM_ION_IMPORT		52	-0.442711	-1.55084	0.0171306	0.0699328	1	2620	tags=40%, list=23%, signal=52%
GO_PHOSPHATIDYLSERINE_METABOLIC_PROCESS	GO_PHOSPHATIDYLSERINE_METABOLIC_PROCESS		16	-0.594339	-1.55034	0.0374449	0.0701848	1	1461	tags=44%, list=13%, signal=50%
KEGG_GLYCINE_SERINE_AND_THREONINE_METABOLISM	KEGG_GLYCINE_SERINE_AND_THREONINE_METABOLISM		17	-0.592515	-1.55014	0.0425101	0.0702516	1	2044	tags=41%, list=18%, signal=50%
GSE43863_NAIVE_VS_TFH_CD4_EFF_TCELL_D6_LCMV_DN	GSE43863_NAIVE_VS_TFH_CD4_EFF_TCELL_D6_LCMV_DN		71	-0.426595	-1.55	0.0107759	0.0703071	1	788	tags=17%, list=7%, signal=18%
GO_REGULATION_OF_HEMOPOIESIS	GO_REGULATION_OF_HEMOPOIESIS		215	-0.352913	-1.54983	0	0.0703536	1	1279	tags=22%, list=11%, signal=24%
MODULE_340	MODULE_340		16	-0.584041	-1.5495	0.0288889	0.0704937	1	47	tags=13%, list=0%, signal=13%
CHIARADONNA_NEOPLASTIC_TRANSFORMATION_CDC25_DN	CHIARADONNA_NEOPLASTIC_TRANSFORMATION_CDC25_DN		114	-0.385102	-1.54933	0.00475059	0.0705446	1	2017	tags=32%, list=17%, signal=39%
REACTOME_DIABETES_PATHWAYS	REACTOME_DIABETES_PATHWAYS		97	-0.401977	-1.54864	0.00469484	0.0709011	1	1384	tags=25%, list=12%, signal=28%
GO_REGULATION_OF_MYELOID_LEUKOCYTE_DIFFERENTIATION	GO_REGULATION_OF_MYELOID_LEUKOCYTE_DIFFERENTIATION		70	-0.421791	-1.54863	0.015625	0.0708607	1	1678	tags=27%, list=14%, signal=32%
MATZUK_CENTRAL_FOR_FEMALE_FERTILITY	MATZUK_CENTRAL_FOR_FEMALE_FERTILITY		15	-0.58811	-1.54861	0.0334728	0.070823	1	879	tags=20%, list=8%, signal=22%
GO_TRANSCRIPTION_FACTOR_ACTIVITY_DIRECT_LIGAND_REGULATED_SEQUENCE_SPECIFIC_DNA_BINDING	GO_TRANSCRIPTION_FACTOR_ACTIVITY_DIRECT_LIGAND_REGULATED_SEQUENCE_SPECIFIC_DNA_BINDING		23	-0.534925	-1.54815	0.042735	0.0710521	1	981	tags=26%, list=8%, signal=28%
GO_UNSATURATED_FATTY_ACID_BIOSYNTHETIC_PROCESS	GO_UNSATURATED_FATTY_ACID_BIOSYNTHETIC_PROCESS		26	-0.51413	-1.54813	0.0363248	0.0710282	1	2861	tags=58%, list=25%, signal=76%
GNF2_SELL	GNF2_SELL		46	-0.459677	-1.54812	0.0235043	0.070987	1	3866	tags=61%, list=33%, signal=91%
GO_VOLTAGE_GATED_ION_CHANNEL_ACTIVITY	GO_VOLTAGE_GATED_ION_CHANNEL_ACTIVITY		50	-0.455762	-1.5481	0.0127119	0.0709579	1	1985	tags=28%, list=17%, signal=34%
GO_IMMUNE_SYSTEM_DEVELOPMENT	GO_IMMUNE_SYSTEM_DEVELOPMENT		376	-0.337481	-1.548	0	0.070971	1	1605	tags=21%, list=14%, signal=24%
GO_CENTRAL_NERVOUS_SYSTEM_NEURON_DIFFERENTIATION	GO_CENTRAL_NERVOUS_SYSTEM_NEURON_DIFFERENTIATION		63	-0.423929	-1.54793	0.0177384	0.0709722	1	1209	tags=21%, list=10%, signal=23%
WOO_LIVER_CANCER_RECURRENCE_UP	WOO_LIVER_CANCER_RECURRENCE_UP		72	-0.423076	-1.54785	0.010989	0.0709672	1	1988	tags=28%, list=17%, signal=33%
GO_REGULATION_OF_HORMONE_LEVELS	GO_REGULATION_OF_HORMONE_LEVELS		214	-0.357857	-1.5472	0	0.0712676	1	2611	tags=31%, list=23%, signal=39%
GSE5589_IL6_KO_VS_IL10_KO_LPS_AND_IL10_STIM_MACROPHAGE_180MIN_DN	GSE5589_IL6_KO_VS_IL10_KO_LPS_AND_IL10_STIM_MACROPHAGE_180MIN_DN		149	-0.372458	-1.54713	0	0.0712616	1	1584	tags=23%, list=14%, signal=27%
LINDSTEDT_DENDRITIC_CELL_MATURATION_A	LINDSTEDT_DENDRITIC_CELL_MATURATION_A		46	-0.448414	-1.54701	0.0211864	0.0712848	1	2575	tags=43%, list=22%, signal=56%
GSE44649_WT_VS_MIR155_KO_NAIVE_CD8_TCELL_UP	GSE44649_WT_VS_MIR155_KO_NAIVE_CD8_TCELL_UP		121	-0.381983	-1.54678	0.00234742	0.0713724	1	2077	tags=31%, list=18%, signal=37%
GSE24102_GRANULOCYSTIC_MDSC_VS_NEUTROPHIL_DN	GSE24102_GRANULOCYSTIC_MDSC_VS_NEUTROPHIL_DN		143	-0.378362	-1.54634	0.00228833	0.0715992	1	1247	tags=24%, list=11%, signal=27%
NIELSEN_SYNOVIAL_SARCOMA_DN	NIELSEN_SYNOVIAL_SARCOMA_DN		16	-0.578571	-1.54594	0.0515464	0.0718049	1	1016	tags=38%, list=9%, signal=41%
GSE9650_NAIVE_VS_MEMORY_CD8_TCELL_DN	GSE9650_NAIVE_VS_MEMORY_CD8_TCELL_DN		161	-0.36595	-1.5459	0.00226757	0.0717789	1	1682	tags=25%, list=15%, signal=29%
LIAN_LIPA_TARGETS_6M	LIAN_LIPA_TARGETS_6M		37	-0.480843	-1.54554	0.016632	0.0719601	1	1454	tags=32%, list=13%, signal=37%
GSE24634_NAIVE_CD4_TCELL_VS_DAY7_IL4_CONV_TREG_UP	GSE24634_NAIVE_CD4_TCELL_VS_DAY7_IL4_CONV_TREG_UP		154	-0.368562	-1.54545	0.00219298	0.0719753	1	1790	tags=21%, list=15%, signal=24%
TURASHVILI_BREAST_LOBULAR_CARCINOMA_VS_DUCTAL_NORMAL_UP	TURASHVILI_BREAST_LOBULAR_CARCINOMA_VS_DUCTAL_NORMAL_UP		33	-0.486654	-1.54542	0.0350109	0.071951	1	1107	tags=27%, list=10%, signal=30%
LIU_SOX4_TARGETS_UP	LIU_SOX4_TARGETS_UP		109	-0.388113	-1.54533	0.00232019	0.071954	1	1551	tags=27%, list=13%, signal=30%
GSE28737_BCL6_HET_VS_BCL6_KO_MARGINAL_ZONE_BCELL_UP	GSE28737_BCL6_HET_VS_BCL6_KO_MARGINAL_ZONE_BCELL_UP		94	-0.397828	-1.54526	0	0.0719527	1	716	tags=17%, list=6%, signal=18%
GSE45365_NK_CELL_VS_CD8_TCELL_MCMV_INFECTION_DN	GSE45365_NK_CELL_VS_CD8_TCELL_MCMV_INFECTION_DN		156	-0.373906	-1.5451	0.0021978	0.0719926	1	2815	tags=39%, list=24%, signal=51%
GO_REGULATION_OF_SYMBIOSIS_ENCOMPASSING_MUTUALISM_THROUGH_PARASITISM	GO_REGULATION_OF_SYMBIOSIS_ENCOMPASSING_MUTUALISM_THROUGH_PARASITISM		156	-0.370149	-1.54435	0.00921659	0.0723813	1	1460	tags=25%, list=13%, signal=28%
GSE40666_UNTREATED_VS_IFNA_STIM_EFFECTOR_CD8_TCELL_90MIN_UP	GSE40666_UNTREATED_VS_IFNA_STIM_EFFECTOR_CD8_TCELL_90MIN_UP		151	-0.375341	-1.54426	0	0.0723875	1	2061	tags=30%, list=18%, signal=37%
GSE22886_DAY1_VS_DAY7_MONOCYTE_IN_CULTURE_UP	GSE22886_DAY1_VS_DAY7_MONOCYTE_IN_CULTURE_UP		172	-0.361244	-1.54373	0.00480769	0.0726206	1	2002	tags=27%, list=17%, signal=32%
YAO_TEMPORAL_RESPONSE_TO_PROGESTERONE_CLUSTER_8	YAO_TEMPORAL_RESPONSE_TO_PROGESTERONE_CLUSTER_8		34	-0.485422	-1.5435	0.0282609	0.0727085	1	1503	tags=29%, list=13%, signal=34%
GRAESSMANN_APOPTOSIS_BY_SERUM_DEPRIVATION_UP	GRAESSMANN_APOPTOSIS_BY_SERUM_DEPRIVATION_UP		371	-0.335936	-1.54339	0	0.0727333	1	1365	tags=21%, list=12%, signal=23%
GSE19198_CTRL_VS_IL21_TREATED_TCELL_1H_DN	GSE19198_CTRL_VS_IL21_TREATED_TCELL_1H_DN		141	-0.379697	-1.54291	0	0.0729586	1	2038	tags=29%, list=18%, signal=35%
AREB6_02	AREB6_02		128	-0.379864	-1.54247	0.00229358	0.0731497	1	1967	tags=27%, list=17%, signal=32%
GO_BLOOD_MICROPARTICLE	GO_BLOOD_MICROPARTICLE		40	-0.457851	-1.54215	0.0200445	0.0732796	1	2071	tags=33%, list=18%, signal=39%
BIOCARTA_BIOPEPTIDES_PATHWAY	BIOCARTA_BIOPEPTIDES_PATHWAY		32	-0.492378	-1.54096	0.025641	0.0739483	1	2381	tags=41%, list=21%, signal=51%
BIOCARTA_MET_PATHWAY	BIOCARTA_MET_PATHWAY		34	-0.486674	-1.54087	0.0275424	0.0739578	1	2389	tags=35%, list=21%, signal=44%
ATF1_Q6	ATF1_Q6		135	-0.380927	-1.54082	0.00451467	0.0739426	1	1756	tags=26%, list=15%, signal=30%
GO_CELLULAR_RESPONSE_TO_VITAMIN	GO_CELLULAR_RESPONSE_TO_VITAMIN		15	-0.585336	-1.54074	0.0451745	0.0739495	1	879	tags=27%, list=8%, signal=29%
GO_REGULATION_OF_B_CELL_MEDIATED_IMMUNITY	GO_REGULATION_OF_B_CELL_MEDIATED_IMMUNITY		28	-0.510657	-1.54046	0.0246637	0.0740645	1	1025	tags=29%, list=9%, signal=31%
GSE36888_UNTREATED_VS_IL2_TREATED_STAT5_AB_KNOCKIN_TCELL_2H_UP	GSE36888_UNTREATED_VS_IL2_TREATED_STAT5_AB_KNOCKIN_TCELL_2H_UP		139	-0.377237	-1.53914	0.0075188	0.074795	1	2404	tags=31%, list=21%, signal=39%
GO_MACROPHAGE_ACTIVATION	GO_MACROPHAGE_ACTIVATION		16	-0.573736	-1.53889	0.0458333	0.0748706	1	2264	tags=44%, list=20%, signal=54%
MODULE_426	MODULE_426		40	-0.476054	-1.53884	0.0174292	0.0748507	1	1187	tags=28%, list=10%, signal=31%
GSE13306_LAMINA_PROPRIA_VS_SPLEEN_TREG_DN	GSE13306_LAMINA_PROPRIA_VS_SPLEEN_TREG_DN		113	-0.389045	-1.53868	0.00692841	0.0748814	1	1139	tags=24%, list=10%, signal=26%
HOFMANN_MYELODYSPLASTIC_SYNDROM_RISK_UP	HOFMANN_MYELODYSPLASTIC_SYNDROM_RISK_UP		16	-0.578301	-1.53866	0.0571429	0.0748497	1	1674	tags=38%, list=14%, signal=44%
DELPUECH_FOXO3_TARGETS_UP	DELPUECH_FOXO3_TARGETS_UP		47	-0.463908	-1.5385	0.0158014	0.074888	1	1630	tags=32%, list=14%, signal=37%
GO_CELLULAR_RESPONSE_TO_EXTERNAL_STIMULUS	GO_CELLULAR_RESPONSE_TO_EXTERNAL_STIMULUS		185	-0.358904	-1.5385	0	0.0748479	1	1692	tags=21%, list=15%, signal=24%
ST_GRANULE_CELL_SURVIVAL_PATHWAY	ST_GRANULE_CELL_SURVIVAL_PATHWAY		19	-0.548815	-1.53815	0.0409091	0.0750102	1	2079	tags=42%, list=18%, signal=51%
DANG_REGULATED_BY_MYC_DN	DANG_REGULATED_BY_MYC_DN		186	-0.361936	-1.53804	0.002457	0.0750467	1	1706	tags=25%, list=15%, signal=29%
MIKKELSEN_MCV6_LCP_WITH_H3K4ME3	MIKKELSEN_MCV6_LCP_WITH_H3K4ME3		79	-0.409466	-1.53764	0.00438597	0.0752061	1	2002	tags=32%, list=17%, signal=38%
HARRIS_HYPOXIA	HARRIS_HYPOXIA		51	-0.448785	-1.53743	0.0172414	0.0752888	1	763	tags=18%, list=7%, signal=19%
GSE17721_CTRL_VS_CPG_2H_BMDC_DN	GSE17721_CTRL_VS_CPG_2H_BMDC_DN		114	-0.384319	-1.53701	0.00452489	0.075484	1	1760	tags=26%, list=15%, signal=31%
FURUKAWA_DUSP6_TARGETS_PCI35_UP	FURUKAWA_DUSP6_TARGETS_PCI35_UP		43	-0.465862	-1.53688	0.0101626	0.0755109	1	1596	tags=40%, list=14%, signal=46%
CROMER_TUMORIGENESIS_UP	CROMER_TUMORIGENESIS_UP		28	-0.506304	-1.53623	0.0327511	0.0758773	1	1787	tags=29%, list=15%, signal=34%
GO_FORMATION_OF_PRIMARY_GERM_LAYER	GO_FORMATION_OF_PRIMARY_GERM_LAYER		50	-0.440547	-1.53595	0.0254777	0.0760257	1	1058	tags=22%, list=9%, signal=24%
ACTTTAT_MIR1425P	ACTTTAT_MIR1425P		204	-0.357495	-1.53583	0	0.0760558	1	1426	tags=19%, list=12%, signal=21%
GO_GLIOGENESIS	GO_GLIOGENESIS		89	-0.398844	-1.53542	0.00660793	0.0762314	1	2446	tags=30%, list=21%, signal=38%
REACTOME_CHOLESTEROL_BIOSYNTHESIS	REACTOME_CHOLESTEROL_BIOSYNTHESIS		20	-0.544904	-1.53538	0.0387931	0.0762133	1	2743	tags=55%, list=24%, signal=72%
GO_GLYCOPROTEIN_METABOLIC_PROCESS	GO_GLYCOPROTEIN_METABOLIC_PROCESS		207	-0.353648	-1.5353	0	0.0762011	1	1631	tags=24%, list=14%, signal=28%
GSE15330_LYMPHOID_MULTIPOTENT_VS_GRANULOCYTE_MONOCYTE_PROGENITOR_IKAROS_KO_DN	GSE15330_LYMPHOID_MULTIPOTENT_VS_GRANULOCYTE_MONOCYTE_PROGENITOR_IKAROS_KO_DN		156	-0.365734	-1.53509	0	0.0762835	1	1706	tags=26%, list=15%, signal=30%
GSE24634_TREG_VS_TCONV_POST_DAY3_IL4_CONVERSION_DN	GSE24634_TREG_VS_TCONV_POST_DAY3_IL4_CONVERSION_DN		160	-0.369458	-1.53462	0	0.0765375	1	2823	tags=39%, list=24%, signal=51%
PARK_APL_PATHOGENESIS_DN	PARK_APL_PATHOGENESIS_DN		37	-0.472359	-1.53443	0.0321888	0.0765995	1	1918	tags=41%, list=17%, signal=48%
MODULE_209	MODULE_209		39	-0.456919	-1.53396	0.0181818	0.0768569	1	1805	tags=36%, list=16%, signal=42%
GO_POSITIVE_REGULATION_OF_REACTIVE_OXYGEN_SPECIES_METABOLIC_PROCESS	GO_POSITIVE_REGULATION_OF_REACTIVE_OXYGEN_SPECIES_METABOLIC_PROCESS		51	-0.441898	-1.53379	0.0169851	0.0769162	1	1261	tags=22%, list=11%, signal=24%
GO_GROWTH_FACTOR_RECEPTOR_BINDING	GO_GROWTH_FACTOR_RECEPTOR_BINDING		66	-0.415848	-1.53374	0.0127932	0.0769037	1	2895	tags=44%, list=25%, signal=58%
PID_EPO_PATHWAY	PID_EPO_PATHWAY		32	-0.490048	-1.53374	0.0274841	0.0768628	1	2770	tags=44%, list=24%, signal=57%
GSE32986_UNSTIM_VS_GMCSF_STIM_DC_DN	GSE32986_UNSTIM_VS_GMCSF_STIM_DC_DN		156	-0.364045	-1.53351	0	0.0769579	1	1728	tags=28%, list=15%, signal=32%
GO_REGULATION_OF_LEUKOCYTE_CHEMOTAXIS	GO_REGULATION_OF_LEUKOCYTE_CHEMOTAXIS		51	-0.440999	-1.53323	0.031746	0.0770902	1	2453	tags=35%, list=21%, signal=45%
TONKS_TARGETS_OF_RUNX1_RUNX1T1_FUSION_SUSTAINDED_IN_ERYTHROCYTE_UP	TONKS_TARGETS_OF_RUNX1_RUNX1T1_FUSION_SUSTAINDED_IN_ERYTHROCYTE_UP		27	-0.500886	-1.53321	0.0280778	0.0770626	1	941	tags=33%, list=8%, signal=36%
GO_REGULATION_OF_RESPONSE_TO_REACTIVE_OXYGEN_SPECIES	GO_REGULATION_OF_RESPONSE_TO_REACTIVE_OXYGEN_SPECIES		23	-0.518974	-1.53315	0.0347072	0.077055	1	636	tags=13%, list=5%, signal=14%
GSE3565_CTRL_VS_LPS_INJECTED_DUSP1_KO_SPLENOCYTES_UP	GSE3565_CTRL_VS_LPS_INJECTED_DUSP1_KO_SPLENOCYTES_UP		135	-0.374775	-1.53277	0	0.0772444	1	1490	tags=28%, list=13%, signal=32%
GSE46606_DAY1_VS_DAY3_CD40L_IL2_IL5_STIMULATED_IRF4HIGH_BCELL_DN	GSE46606_DAY1_VS_DAY3_CD40L_IL2_IL5_STIMULATED_IRF4HIGH_BCELL_DN		157	-0.367583	-1.53224	0.00478469	0.0775051	1	1685	tags=24%, list=15%, signal=27%
GSE19888_ADENOSINE_A3R_ACT_VS_TCELL_MEMBRANES_ACT_IN_MAST_CELL_UP	GSE19888_ADENOSINE_A3R_ACT_VS_TCELL_MEMBRANES_ACT_IN_MAST_CELL_UP		129	-0.380003	-1.53218	0.011236	0.0774922	1	1613	tags=26%, list=14%, signal=30%
GSE19923_WT_VS_HEB_KO_DP_THYMOCYTE_UP	GSE19923_WT_VS_HEB_KO_DP_THYMOCYTE_UP		112	-0.384941	-1.53184	0.00476191	0.0776486	1	1505	tags=24%, list=13%, signal=27%
PID_PTP1B_PATHWAY	PID_PTP1B_PATHWAY		38	-0.474123	-1.53179	0.0252101	0.0776348	1	2813	tags=42%, list=24%, signal=55%
DOANE_BREAST_CANCER_ESR1_DN	DOANE_BREAST_CANCER_ESR1_DN		15	-0.580036	-1.53177	0.0539957	0.0775954	1	2629	tags=53%, list=23%, signal=69%
MODULE_522	MODULE_522		27	-0.51296	-1.53159	0.0480349	0.0776396	1	2751	tags=48%, list=24%, signal=63%
SMID_BREAST_CANCER_LUMINAL_A_UP	SMID_BREAST_CANCER_LUMINAL_A_UP		28	-0.501441	-1.53134	0.0392157	0.0777724	1	19	tags=7%, list=0%, signal=7%
SABATES_COLORECTAL_ADENOMA_DN	SABATES_COLORECTAL_ADENOMA_DN		88	-0.401414	-1.53129	0.0114155	0.0777554	1	1410	tags=23%, list=12%, signal=26%
HALLMARK_ALLOGRAFT_REJECTION	HALLMARK_ALLOGRAFT_REJECTION		142	-0.375725	-1.53054	0.00236967	0.0781445	1	1962	tags=29%, list=17%, signal=34%
ATGTAGC_MIR221_MIR222	ATGTAGC_MIR221_MIR222		88	-0.392775	-1.53049	0.00968523	0.0781338	1	1651	tags=25%, list=14%, signal=29%
GSE13484_3H_UNSTIM_VS_YF17D_VACCINE_STIM_PBMC_DN	GSE13484_3H_UNSTIM_VS_YF17D_VACCINE_STIM_PBMC_DN		155	-0.367548	-1.53048	0.00477327	0.0780917	1	2632	tags=40%, list=23%, signal=51%
GSE19888_ADENOSINE_A3R_INH_VS_ACT_IN_MAST_CELL_DN	GSE19888_ADENOSINE_A3R_INH_VS_ACT_IN_MAST_CELL_DN		110	-0.382749	-1.53012	0.00468384	0.0782748	1	1246	tags=26%, list=11%, signal=29%
GSE22886_NAIVE_TCELL_VS_MONOCYTE_DN	GSE22886_NAIVE_TCELL_VS_MONOCYTE_DN		171	-0.364861	-1.52982	0.00226244	0.0783952	1	2727	tags=38%, list=24%, signal=49%
GO_RESPONSE_TO_AMPHETAMINE	GO_RESPONSE_TO_AMPHETAMINE		18	-0.559422	-1.52971	0.038055	0.078409	1	15	tags=11%, list=0%, signal=11%
GO_REGULATION_OF_TRANSPORTER_ACTIVITY	GO_REGULATION_OF_TRANSPORTER_ACTIVITY		95	-0.394921	-1.5297	0.00234192	0.078371	1	2013	tags=29%, list=17%, signal=35%
GO_POSITIVE_REGULATION_OF_CELL_PROLIFERATION	GO_POSITIVE_REGULATION_OF_CELL_PROLIFERATION		444	-0.326959	-1.52956	0	0.0784089	1	2466	tags=29%, list=21%, signal=35%
GOTTWEIN_TARGETS_OF_KSHV_MIR_K12_11	GOTTWEIN_TARGETS_OF_KSHV_MIR_K12_11		52	-0.43625	-1.52928	0.0153846	0.0785249	1	1239	tags=21%, list=11%, signal=24%
P53_DN.V1_DN	P53_DN.V1_DN		117	-0.38346	-1.52923	0.0021645	0.0785125	1	1959	tags=34%, list=17%, signal=41%
GSE9650_NAIVE_VS_EXHAUSTED_CD8_TCELL_DN	GSE9650_NAIVE_VS_EXHAUSTED_CD8_TCELL_DN		127	-0.376896	-1.52899	0.00210084	0.0786299	1	1413	tags=24%, list=12%, signal=27%
GO_POSITIVE_REGULATION_OF_EPITHELIAL_CELL_DIFFERENTIATION	GO_POSITIVE_REGULATION_OF_EPITHELIAL_CELL_DIFFERENTIATION		25	-0.522789	-1.52897	0.0423729	0.0785902	1	471	tags=20%, list=4%, signal=21%
GO_LEARNING	GO_LEARNING		65	-0.418462	-1.52853	0.025974	0.0788224	1	2234	tags=32%, list=19%, signal=40%
GSE17721_12H_VS_24H_LPS_BMDC_UP	GSE17721_12H_VS_24H_LPS_BMDC_UP		157	-0.366549	-1.52766	0.0022173	0.0793243	1	1423	tags=20%, list=12%, signal=23%
IZADPANAH_STEM_CELL_ADIPOSE_VS_BONE_UP	IZADPANAH_STEM_CELL_ADIPOSE_VS_BONE_UP		97	-0.39397	-1.52754	0.00657895	0.0793564	1	1917	tags=29%, list=17%, signal=34%
GSE32034_LY6C_HIGH_VS_LOW_MONOCYTE_UP	GSE32034_LY6C_HIGH_VS_LOW_MONOCYTE_UP		126	-0.376299	-1.52752	0.00671141	0.0793304	1	1800	tags=29%, list=16%, signal=34%
GO_REGULATION_OF_ENDOTHELIAL_CELL_PROLIFERATION	GO_REGULATION_OF_ENDOTHELIAL_CELL_PROLIFERATION		50	-0.442397	-1.52751	0.0147059	0.0792855	1	884	tags=18%, list=8%, signal=19%
GO_MONOSACCHARIDE_TRANSPORT	GO_MONOSACCHARIDE_TRANSPORT		28	-0.499	-1.52733	0.0239651	0.0793364	1	2313	tags=46%, list=20%, signal=58%
GSE29618_BCELL_VS_PDC_DAY7_FLU_VACCINE_UP	GSE29618_BCELL_VS_PDC_DAY7_FLU_VACCINE_UP		166	-0.363335	-1.527	0.00222222	0.0794904	1	2057	tags=31%, list=18%, signal=38%
GO_REGULATION_OF_HUMORAL_IMMUNE_RESPONSE	GO_REGULATION_OF_HUMORAL_IMMUNE_RESPONSE		19	-0.551484	-1.52691	0.026749	0.0794921	1	1380	tags=26%, list=12%, signal=30%
CHIARADONNA_NEOPLASTIC_TRANSFORMATION_KRAS_CDC25_UP	CHIARADONNA_NEOPLASTIC_TRANSFORMATION_KRAS_CDC25_UP		41	-0.458513	-1.52658	0.0278373	0.0796466	1	1836	tags=32%, list=16%, signal=38%
PEREZ_TP63_TARGETS	PEREZ_TP63_TARGETS		172	-0.361212	-1.52657	0.00477327	0.0796058	1	1289	tags=19%, list=11%, signal=21%
GO_REGULATION_OF_FILOPODIUM_ASSEMBLY	GO_REGULATION_OF_FILOPODIUM_ASSEMBLY		21	-0.529425	-1.52651	0.0422535	0.079587	1	2015	tags=43%, list=17%, signal=52%
GSE360_L_DONOVANI_VS_B_MALAYI_HIGH_DOSE_MAC_DN	GSE360_L_DONOVANI_VS_B_MALAYI_HIGH_DOSE_MAC_DN		161	-0.366906	-1.52645	0	0.0795749	1	1452	tags=23%, list=13%, signal=26%
DELASERNA_MYOD_TARGETS_DN	DELASERNA_MYOD_TARGETS_DN		36	-0.472219	-1.52561	0.0321888	0.0800491	1	429	tags=17%, list=4%, signal=17%
GO_CELL_CELL_ADHESION	GO_CELL_CELL_ADHESION		295	-0.340647	-1.5256	0	0.0800081	1	2255	tags=28%, list=19%, signal=34%
REN_ALVEOLAR_RHABDOMYOSARCOMA_DN	REN_ALVEOLAR_RHABDOMYOSARCOMA_DN		313	-0.335664	-1.52556	0	0.0799882	1	1797	tags=24%, list=16%, signal=28%
KLEIN_PRIMARY_EFFUSION_LYMPHOMA_UP	KLEIN_PRIMARY_EFFUSION_LYMPHOMA_UP		42	-0.457237	-1.52517	0.0262582	0.0801898	1	1917	tags=33%, list=17%, signal=40%
GSE23114_PERITONEAL_CAVITY_B1A_BCELL_VS_SPLEEN_BCELL_UP	GSE23114_PERITONEAL_CAVITY_B1A_BCELL_VS_SPLEEN_BCELL_UP		72	-0.415249	-1.5251	0.016092	0.0801935	1	492	tags=11%, list=4%, signal=12%
GSE17721_POLYIC_VS_CPG_1H_BMDC_DN	GSE17721_POLYIC_VS_CPG_1H_BMDC_DN		140	-0.369306	-1.52504	0.00240964	0.0801923	1	1419	tags=17%, list=12%, signal=19%
ELVIDGE_HIF1A_TARGETS_DN	ELVIDGE_HIF1A_TARGETS_DN		69	-0.410896	-1.5245	0.0152174	0.0804811	1	1419	tags=26%, list=12%, signal=30%
GO_CELL_FATE_COMMITMENT	GO_CELL_FATE_COMMITMENT		81	-0.406143	-1.52443	0.00904977	0.0804878	1	1995	tags=32%, list=17%, signal=39%
GALLUZZI_PREVENT_MITOCHONDIAL_PERMEABILIZATION	GALLUZZI_PREVENT_MITOCHONDIAL_PERMEABILIZATION		17	-0.585928	-1.52276	0.0455446	0.0814917	1	1419	tags=35%, list=12%, signal=40%
SHAFFER_IRF4_TARGETS_IN_ACTIVATED_DENDRITIC_CELL	SHAFFER_IRF4_TARGETS_IN_ACTIVATED_DENDRITIC_CELL		62	-0.417996	-1.52254	0.0168421	0.081583	1	1493	tags=29%, list=13%, signal=33%
GO_VASCULATURE_DEVELOPMENT	GO_VASCULATURE_DEVELOPMENT		257	-0.347032	-1.52239	0	0.0816375	1	1240	tags=19%, list=11%, signal=21%
RGAANNTTC_HSF1_01	RGAANNTTC_HSF1_01		257	-0.342994	-1.52224	0	0.081659	1	2444	tags=30%, list=21%, signal=37%
GSE15659_RESTING_TREG_VS_NONSUPPRESSIVE_TCELL_DN	GSE15659_RESTING_TREG_VS_NONSUPPRESSIVE_TCELL_DN		123	-0.376157	-1.52183	0.00665188	0.081886	1	1246	tags=21%, list=11%, signal=23%
LEE_CALORIE_RESTRICTION_MUSCLE_UP	LEE_CALORIE_RESTRICTION_MUSCLE_UP		30	-0.49242	-1.52169	0.0283688	0.0819251	1	944	tags=23%, list=8%, signal=25%
MODULE_107	MODULE_107		33	-0.485757	-1.52157	0.0275424	0.0819431	1	1805	tags=39%, list=16%, signal=47%
GSE29164_UNTREATED_VS_CD8_TCELL_AND_IL12_TREATED_MELANOMA_DAY7_DN	GSE29164_UNTREATED_VS_CD8_TCELL_AND_IL12_TREATED_MELANOMA_DAY7_DN		133	-0.372212	-1.52157	0	0.0818965	1	1451	tags=23%, list=13%, signal=25%
CHR14Q24	CHR14Q24		54	-0.441557	-1.52146	0.0175439	0.0819172	1	930	tags=15%, list=8%, signal=16%
KRAS.LUNG_UP.V1_UP	KRAS.LUNG_UP.V1_UP		49	-0.437919	-1.52129	0.0234542	0.0819884	1	896	tags=22%, list=8%, signal=24%
NAKAMURA_TUMOR_ZONE_PERIPHERAL_VS_CENTRAL_DN	NAKAMURA_TUMOR_ZONE_PERIPHERAL_VS_CENTRAL_DN		435	-0.327828	-1.52114	0	0.0820208	1	1272	tags=20%, list=11%, signal=21%
GSE3203_UNTREATED_VS_IFNB_TREATED_LN_BCELL_DN	GSE3203_UNTREATED_VS_IFNB_TREATED_LN_BCELL_DN		94	-0.394724	-1.52113	0.00655022	0.0819807	1	1216	tags=26%, list=11%, signal=28%
KEGG_TOLL_LIKE_RECEPTOR_SIGNALING_PATHWAY	KEGG_TOLL_LIKE_RECEPTOR_SIGNALING_PATHWAY		75	-0.409821	-1.52088	0.0136674	0.0821244	1	776	tags=12%, list=7%, signal=13%
GO_ADENYLYLTRANSFERASE_ACTIVITY	GO_ADENYLYLTRANSFERASE_ACTIVITY		21	-0.524916	-1.52078	0.0526316	0.0821367	1	2372	tags=52%, list=20%, signal=66%
PID_BCR_5PATHWAY	PID_BCR_5PATHWAY		64	-0.42565	-1.52073	0.00487805	0.0821254	1	1006	tags=19%, list=9%, signal=20%
KANG_IMMORTALIZED_BY_TERT_DN	KANG_IMMORTALIZED_BY_TERT_DN		46	-0.440436	-1.52069	0.0189474	0.0821006	1	1879	tags=26%, list=16%, signal=31%
PID_ERBB2_ERBB3_PATHWAY	PID_ERBB2_ERBB3_PATHWAY		36	-0.465487	-1.52065	0.0244898	0.0820799	1	2371	tags=28%, list=20%, signal=35%
REACTOME_SMAD2_SMAD3_SMAD4_HETEROTRIMER_REGULATES_TRANSCRIPTION	REACTOME_SMAD2_SMAD3_SMAD4_HETEROTRIMER_REGULATES_TRANSCRIPTION		24	-0.507555	-1.52001	0.0396476	0.0824647	1	1820	tags=33%, list=16%, signal=39%
GO_TUMOR_NECROSIS_FACTOR_RECEPTOR_BINDING	GO_TUMOR_NECROSIS_FACTOR_RECEPTOR_BINDING		25	-0.515215	-1.51999	0.0434783	0.0824221	1	447	tags=20%, list=4%, signal=21%
GSE17721_CPG_VS_GARDIQUIMOD_1H_BMDC_UP	GSE17721_CPG_VS_GARDIQUIMOD_1H_BMDC_UP		135	-0.37166	-1.51993	0.00461894	0.0824124	1	1934	tags=28%, list=17%, signal=33%
VANTVEER_BREAST_CANCER_METASTASIS_UP	VANTVEER_BREAST_CANCER_METASTASIS_UP		32	-0.487376	-1.51978	0.0293454	0.0824679	1	2677	tags=41%, list=23%, signal=53%
REACTOME_ACTIVATION_OF_NMDA_RECEPTOR_UPON_GLUTAMATE_BINDING_AND_POSTSYNAPTIC_EVENTS	REACTOME_ACTIVATION_OF_NMDA_RECEPTOR_UPON_GLUTAMATE_BINDING_AND_POSTSYNAPTIC_EVENTS		20	-0.534379	-1.51962	0.039666	0.0825255	1	2371	tags=40%, list=20%, signal=50%
GO_CERAMIDE_METABOLIC_PROCESS	GO_CERAMIDE_METABOLIC_PROCESS		50	-0.436062	-1.51959	0.0309917	0.082495	1	1287	tags=30%, list=11%, signal=34%
MILI_PSEUDOPODIA_CHEMOTAXIS_DN	MILI_PSEUDOPODIA_CHEMOTAXIS_DN		350	-0.331072	-1.51955	0	0.0824701	1	1631	tags=24%, list=14%, signal=27%
GSE17721_PAM3CSK4_VS_GADIQUIMOD_4H_BMDC_DN	GSE17721_PAM3CSK4_VS_GADIQUIMOD_4H_BMDC_DN		146	-0.374637	-1.51927	0.00681818	0.0825923	1	1877	tags=31%, list=16%, signal=36%
BOYLAN_MULTIPLE_MYELOMA_C_D_DN	BOYLAN_MULTIPLE_MYELOMA_C_D_DN		142	-0.366601	-1.51918	0.0138249	0.0826065	1	1808	tags=27%, list=16%, signal=31%
BRIDEAU_IMPRINTED_GENES	BRIDEAU_IMPRINTED_GENES		30	-0.482535	-1.51909	0.0268595	0.082616	1	577	tags=20%, list=5%, signal=21%
STOSSI_RESPONSE_TO_ESTRADIOL	STOSSI_RESPONSE_TO_ESTRADIOL		19	-0.546205	-1.51884	0.0521739	0.0827468	1	450	tags=21%, list=4%, signal=22%
GO_ANTIGEN_PROCESSING_AND_PRESENTATION_OF_PEPTIDE_ANTIGEN	GO_ANTIGEN_PROCESSING_AND_PRESENTATION_OF_PEPTIDE_ANTIGEN		146	-0.369889	-1.5188	0.00457666	0.0827258	1	1842	tags=27%, list=16%, signal=31%
LIU_PROSTATE_CANCER_DN	LIU_PROSTATE_CANCER_DN		231	-0.346782	-1.51783	0	0.0832998	1	2636	tags=35%, list=23%, signal=44%
GSE24634_TREG_VS_TCONV_POST_DAY10_IL4_CONVERSION_DN	GSE24634_TREG_VS_TCONV_POST_DAY10_IL4_CONVERSION_DN		138	-0.370706	-1.51756	0	0.0834341	1	1766	tags=33%, list=15%, signal=38%
GSE5589_IL6_KO_VS_IL10_KO_LPS_STIM_MACROPHAGE_45MIN_DN	GSE5589_IL6_KO_VS_IL10_KO_LPS_STIM_MACROPHAGE_45MIN_DN		148	-0.366402	-1.51744	0	0.0834582	1	1972	tags=30%, list=17%, signal=35%
GO_NEGATIVE_REGULATION_OF_RESPONSE_TO_ENDOPLASMIC_RETICULUM_STRESS	GO_NEGATIVE_REGULATION_OF_RESPONSE_TO_ENDOPLASMIC_RETICULUM_STRESS		32	-0.490804	-1.5173	0.032538	0.0835221	1	376	tags=19%, list=3%, signal=19%
IVANOVA_HEMATOPOIESIS_STEM_CELL	IVANOVA_HEMATOPOIESIS_STEM_CELL		150	-0.367465	-1.51722	0	0.0835253	1	1331	tags=17%, list=11%, signal=19%
GO_FAT_CELL_DIFFERENTIATION	GO_FAT_CELL_DIFFERENTIATION		61	-0.426914	-1.51697	0.0259179	0.0836517	1	1201	tags=21%, list=10%, signal=24%
GSE17974_0H_VS_2H_IN_VITRO_ACT_CD4_TCELL_DN	GSE17974_0H_VS_2H_IN_VITRO_ACT_CD4_TCELL_DN		158	-0.359284	-1.51625	0	0.084046	1	1835	tags=24%, list=16%, signal=28%
GSE7852_TREG_VS_TCONV_LN_UP	GSE7852_TREG_VS_TCONV_LN_UP		157	-0.360162	-1.51617	0.00454545	0.0840417	1	2251	tags=31%, list=19%, signal=38%
GO_COATED_VESICLE	GO_COATED_VESICLE		167	-0.359836	-1.51556	0.0022173	0.0843756	1	1978	tags=28%, list=17%, signal=33%
GO_SCHWANN_CELL_DIFFERENTIATION	GO_SCHWANN_CELL_DIFFERENTIATION		19	-0.550991	-1.51519	0.0411255	0.0845615	1	2446	tags=37%, list=21%, signal=47%
GSE22886_NAIVE_TCELL_VS_DC_DN	GSE22886_NAIVE_TCELL_VS_DC_DN		169	-0.354183	-1.51516	0.00954654	0.0845388	1	1101	tags=18%, list=10%, signal=20%
GO_RESPONSE_TO_FUNGUS	GO_RESPONSE_TO_FUNGUS		18	-0.556013	-1.51474	0.0413043	0.0847413	1	1117	tags=28%, list=10%, signal=31%
NING_CHRONIC_OBSTRUCTIVE_PULMONARY_DISEASE_UP	NING_CHRONIC_OBSTRUCTIVE_PULMONARY_DISEASE_UP		116	-0.375363	-1.51429	0.00881057	0.0850005	1	1476	tags=22%, list=13%, signal=24%
GO_REGULATION_OF_CYTOKINE_PRODUCTION_INVOLVED_IN_IMMUNE_RESPONSE	GO_REGULATION_OF_CYTOKINE_PRODUCTION_INVOLVED_IN_IMMUNE_RESPONSE		37	-0.468931	-1.51415	0.0282609	0.0850496	1	1025	tags=27%, list=9%, signal=30%
GSE5455_HEALTHY_VS_TUMOR_BEARING_MOUSE_SPLEEN_MONOCYTE_UP	GSE5455_HEALTHY_VS_TUMOR_BEARING_MOUSE_SPLEEN_MONOCYTE_UP		127	-0.374671	-1.51381	0.00226757	0.0852037	1	1797	tags=28%, list=16%, signal=32%
GSE17721_LPS_VS_GARDIQUIMOD_24H_BMDC_UP	GSE17721_LPS_VS_GARDIQUIMOD_24H_BMDC_UP		132	-0.371682	-1.51366	0.00678733	0.0852528	1	2108	tags=29%, list=18%, signal=35%
GSE7460_CTRL_VS_TGFB_TREATED_ACT_CD8_TCELL_DN	GSE7460_CTRL_VS_TGFB_TREATED_ACT_CD8_TCELL_DN		127	-0.370084	-1.51355	0.00680272	0.0852646	1	1718	tags=24%, list=15%, signal=28%
GSE8921_UNSTIM_0H_VS_TLR1_2_STIM_MONOCYTE_6H_DN	GSE8921_UNSTIM_0H_VS_TLR1_2_STIM_MONOCYTE_6H_DN		134	-0.36808	-1.51354	0.00468384	0.0852266	1	1879	tags=26%, list=16%, signal=31%
GSE14415_INDUCED_TREG_VS_FOXP3_KO_INDUCED_TREG_IL2_CULTURE_UP	GSE14415_INDUCED_TREG_VS_FOXP3_KO_INDUCED_TREG_IL2_CULTURE_UP		130	-0.37531	-1.51323	0.00220264	0.0853845	1	1908	tags=31%, list=16%, signal=36%
REACTOME_CREB_PHOSPHORYLATION_THROUGH_THE_ACTIVATION_OF_RAS	REACTOME_CREB_PHOSPHORYLATION_THROUGH_THE_ACTIVATION_OF_RAS		15	-0.576949	-1.51321	0.0365112	0.0853457	1	2371	tags=47%, list=20%, signal=59%
GO_CYTOKINE_BINDING	GO_CYTOKINE_BINDING		46	-0.444541	-1.51301	0.0302326	0.0854298	1	1616	tags=24%, list=14%, signal=28%
KORKOLA_CORRELATED_WITH_POU5F1	KORKOLA_CORRELATED_WITH_POU5F1		15	-0.590248	-1.51299	0.0387931	0.0853886	1	850	tags=27%, list=7%, signal=29%
BIOCARTA_TPO_PATHWAY	BIOCARTA_TPO_PATHWAY		22	-0.517518	-1.51277	0.0413043	0.0854695	1	2371	tags=36%, list=20%, signal=46%
ELVIDGE_HYPOXIA_UP	ELVIDGE_HYPOXIA_UP		133	-0.375479	-1.51264	0.00677201	0.0855132	1	1419	tags=24%, list=12%, signal=27%
PID_IL23_PATHWAY	PID_IL23_PATHWAY		26	-0.507457	-1.51255	0.0365591	0.0855193	1	155	tags=15%, list=1%, signal=16%
GSE39820_CTRL_VS_IL1B_IL6_CD4_TCELL_DN	GSE39820_CTRL_VS_IL1B_IL6_CD4_TCELL_DN		143	-0.366319	-1.5124	0	0.085575	1	2439	tags=31%, list=21%, signal=39%
CHESLER_BRAIN_HIGHEST_EXPRESSION	CHESLER_BRAIN_HIGHEST_EXPRESSION		32	-0.481937	-1.51236	0.0334076	0.0855409	1	777	tags=19%, list=7%, signal=20%
HAN_JNK_SINGALING_DN	HAN_JNK_SINGALING_DN		20	-0.539155	-1.51234	0.0413386	0.08551	1	778	tags=30%, list=7%, signal=32%
GSE2197_IMMUNOSUPPRESSIVE_DNA_VS_UNTREATED_IN_DC_UP	GSE2197_IMMUNOSUPPRESSIVE_DNA_VS_UNTREATED_IN_DC_UP		156	-0.362594	-1.51198	0.00697674	0.0856901	1	1281	tags=22%, list=11%, signal=25%
ROY_WOUND_BLOOD_VESSEL_UP	ROY_WOUND_BLOOD_VESSEL_UP		27	-0.501351	-1.51195	0.0411255	0.0856568	1	1890	tags=52%, list=16%, signal=62%
GO_CYTOPLASMIC_VESICLE_PART	GO_CYTOPLASMIC_VESICLE_PART		339	-0.327924	-1.51188	0.00483092	0.0856477	1	2264	tags=29%, list=20%, signal=36%
CREB_01	CREB_01		181	-0.355248	-1.51185	0	0.0856247	1	1388	tags=19%, list=12%, signal=21%
GO_REGULATION_OF_STAT_CASCADE	GO_REGULATION_OF_STAT_CASCADE		73	-0.40777	-1.5117	0.018018	0.0856775	1	2453	tags=40%, list=21%, signal=50%
GSE32034_LY6C_HIGH_VS_LOW_ROSIGLIZATONE_TREATED_MONOCYTE_UP	GSE32034_LY6C_HIGH_VS_LOW_ROSIGLIZATONE_TREATED_MONOCYTE_UP		164	-0.361671	-1.51164	0	0.0856842	1	1685	tags=26%, list=15%, signal=30%
GO_PLASMA_MEMBRANE_PROTEIN_COMPLEX	GO_PLASMA_MEMBRANE_PROTEIN_COMPLEX		242	-0.340237	-1.51164	0	0.0856361	1	2598	tags=35%, list=22%, signal=44%
MODULE_220	MODULE_220		120	-0.376257	-1.51157	0.00449438	0.085642	1	2814	tags=35%, list=24%, signal=46%
BIOCARTA_PDGF_PATHWAY	BIOCARTA_PDGF_PATHWAY		31	-0.482831	-1.51112	0.028169	0.0858892	1	498	tags=13%, list=4%, signal=13%
GO_CYCLIC_NUCLEOTIDE_METABOLIC_PROCESS	GO_CYCLIC_NUCLEOTIDE_METABOLIC_PROCESS		27	-0.493348	-1.51104	0.0434783	0.0858912	1	3310	tags=48%, list=29%, signal=67%
GO_POSITIVE_REGULATION_OF_MAP_KINASE_ACTIVITY	GO_POSITIVE_REGULATION_OF_MAP_KINASE_ACTIVITY		131	-0.3715	-1.5107	0.00451467	0.0860531	1	1053	tags=18%, list=9%, signal=19%
HFH3_01	HFH3_01		99	-0.385644	-1.5107	0.0043573	0.0860042	1	1447	tags=21%, list=12%, signal=24%
GSE36078_WT_VS_IL1R_KO_LUNG_DC_AFTER_AD5_INF_DN	GSE36078_WT_VS_IL1R_KO_LUNG_DC_AFTER_AD5_INF_DN		164	-0.360323	-1.51061	0.00225225	0.0860122	1	1643	tags=25%, list=14%, signal=29%
SPIELMAN_LYMPHOBLAST_EUROPEAN_VS_ASIAN_2FC_DN	SPIELMAN_LYMPHOBLAST_EUROPEAN_VS_ASIAN_2FC_DN		19	-0.546876	-1.51048	0.0393375	0.0860328	1	1783	tags=47%, list=15%, signal=56%
GSE24142_EARLY_THYMIC_PROGENITOR_VS_DN3_THYMOCYTE_DN	GSE24142_EARLY_THYMIC_PROGENITOR_VS_DN3_THYMOCYTE_DN		144	-0.36557	-1.51016	0.0022779	0.0861911	1	1643	tags=26%, list=14%, signal=30%
SA_B_CELL_RECEPTOR_COMPLEXES	SA_B_CELL_RECEPTOR_COMPLEXES		23	-0.52913	-1.50991	0.0400844	0.0863049	1	611	tags=13%, list=5%, signal=14%
GO_MEMBRANE_LIPID_BIOSYNTHETIC_PROCESS	GO_MEMBRANE_LIPID_BIOSYNTHETIC_PROCESS		77	-0.401809	-1.50973	0.0130719	0.0863719	1	1278	tags=23%, list=11%, signal=26%
GSE43863_DAY6_EFF_VS_DAY150_MEM_TH1_CD4_TCELL_DN	GSE43863_DAY6_EFF_VS_DAY150_MEM_TH1_CD4_TCELL_DN		158	-0.358871	-1.50973	0.00224719	0.0863229	1	2287	tags=31%, list=20%, signal=38%
GO_MORPHOGENESIS_OF_A_BRANCHING_STRUCTURE	GO_MORPHOGENESIS_OF_A_BRANCHING_STRUCTURE		78	-0.408582	-1.50954	0.0151515	0.0863992	1	1088	tags=21%, list=9%, signal=22%
GSE17721_LPS_VS_CPG_1H_BMDC_DN	GSE17721_LPS_VS_CPG_1H_BMDC_DN		150	-0.364159	-1.50929	0.00444444	0.0865027	1	1723	tags=23%, list=15%, signal=27%
GSE23114_WT_VS_SLE2C1_MOUSE_PERITONEAL_CAVITY_B1A_BCELL_DN	GSE23114_WT_VS_SLE2C1_MOUSE_PERITONEAL_CAVITY_B1A_BCELL_DN		66	-0.412165	-1.50918	0.0151515	0.0865213	1	1169	tags=23%, list=10%, signal=25%
BIOCARTA_SPPA_PATHWAY	BIOCARTA_SPPA_PATHWAY		18	-0.556842	-1.50888	0.0371179	0.0866655	1	1478	tags=50%, list=13%, signal=57%
GO_CLATHRIN_COATED_ENDOCYTIC_VESICLE_MEMBRANE	GO_CLATHRIN_COATED_ENDOCYTIC_VESICLE_MEMBRANE		31	-0.482076	-1.50855	0.0526316	0.0868373	1	1763	tags=32%, list=15%, signal=38%
GO_LIPID_BIOSYNTHETIC_PROCESS	GO_LIPID_BIOSYNTHETIC_PROCESS		347	-0.328562	-1.50822	0.0027248	0.0870308	1	2488	tags=30%, list=21%, signal=37%
GSE13547_2H_VS_12_H_ANTI_IGM_STIM_ZFX_KO_BCELL_UP	GSE13547_2H_VS_12_H_ANTI_IGM_STIM_ZFX_KO_BCELL_UP		130	-0.372439	-1.50796	0.00959233	0.0871602	1	1871	tags=28%, list=16%, signal=33%
GSE17721_0.5H_VS_24H_CPG_BMDC_DN	GSE17721_0.5H_VS_24H_CPG_BMDC_DN		151	-0.360589	-1.50789	0.00238095	0.087166	1	2409	tags=35%, list=21%, signal=44%
PDGF_ERK_DN.V1_DN	PDGF_ERK_DN.V1_DN		113	-0.381144	-1.50766	0.00894855	0.0872792	1	592	tags=12%, list=5%, signal=13%
GO_REGULATION_OF_MUSCLE_ADAPTATION	GO_REGULATION_OF_MUSCLE_ADAPTATION		40	-0.445583	-1.50762	0.0371179	0.0872579	1	1610	tags=35%, list=14%, signal=41%
SERVITJA_ISLET_HNF1A_TARGETS_DN	SERVITJA_ISLET_HNF1A_TARGETS_DN		39	-0.462153	-1.50725	0.02537	0.0874582	1	2718	tags=36%, list=23%, signal=47%
ATF_B	ATF_B		119	-0.376768	-1.50716	0.00225225	0.0874647	1	1388	tags=18%, list=12%, signal=21%
IRF1_01	IRF1_01		148	-0.370407	-1.50716	0.00493827	0.0874171	1	2212	tags=31%, list=19%, signal=38%
GSE36476_CTRL_VS_TSST_ACT_40H_MEMORY_CD4_TCELL_OLD_UP	GSE36476_CTRL_VS_TSST_ACT_40H_MEMORY_CD4_TCELL_OLD_UP		132	-0.369892	-1.50706	0.00235849	0.0874335	1	2004	tags=31%, list=17%, signal=37%
REACTOME_TRAF6_MEDIATED_IRF7_ACTIVATION	REACTOME_TRAF6_MEDIATED_IRF7_ACTIVATION		18	-0.537893	-1.50668	0.0517598	0.0876517	1	1126	tags=33%, list=10%, signal=37%
GSE11961_MARGINAL_ZONE_BCELL_VS_MEMORY_BCELL_DAY40_UP	GSE11961_MARGINAL_ZONE_BCELL_VS_MEMORY_BCELL_DAY40_UP		125	-0.374311	-1.50661	0	0.0876395	1	1856	tags=26%, list=16%, signal=31%
GSE26495_NAIVE_VS_PD1LOW_CD8_TCELL_DN	GSE26495_NAIVE_VS_PD1LOW_CD8_TCELL_DN		159	-0.359584	-1.50618	0	0.0878691	1	2383	tags=32%, list=21%, signal=40%
CADWELL_ATG16L1_TARGETS_UP	CADWELL_ATG16L1_TARGETS_UP		37	-0.462333	-1.50615	0.0333333	0.0878298	1	1336	tags=24%, list=12%, signal=27%
GSE27786_NKTCELL_VS_ERYTHROBLAST_UP	GSE27786_NKTCELL_VS_ERYTHROBLAST_UP		173	-0.356836	-1.50577	0	0.088056	1	1397	tags=19%, list=12%, signal=21%
GSE25088_CTRL_VS_IL4_STIM_STAT6_KO_MACROPHAGE_DN	GSE25088_CTRL_VS_IL4_STIM_STAT6_KO_MACROPHAGE_DN		115	-0.374257	-1.50571	0.0108696	0.0880505	1	1358	tags=21%, list=12%, signal=23%
GSE17721_CTRL_VS_POLYIC_4H_BMDC_DN	GSE17721_CTRL_VS_POLYIC_4H_BMDC_DN		135	-0.372554	-1.50566	0.00526316	0.0880412	1	1423	tags=24%, list=12%, signal=27%
GO_NEGATIVE_REGULATION_OF_PRODUCTION_OF_MOLECULAR_MEDIATOR_OF_IMMUNE_RESPONSE	GO_NEGATIVE_REGULATION_OF_PRODUCTION_OF_MOLECULAR_MEDIATOR_OF_IMMUNE_RESPONSE		16	-0.573142	-1.50557	0.0537634	0.0880541	1	1025	tags=38%, list=9%, signal=41%
MARCINIAK_ER_STRESS_RESPONSE_VIA_CHOP	MARCINIAK_ER_STRESS_RESPONSE_VIA_CHOP		19	-0.545252	-1.50546	0.0390144	0.088071	1	495	tags=16%, list=4%, signal=16%
GO_POSITIVE_REGULATION_OF_INTRINSIC_APOPTOTIC_SIGNALING_PATHWAY	GO_POSITIVE_REGULATION_OF_INTRINSIC_APOPTOTIC_SIGNALING_PATHWAY		45	-0.446566	-1.50539	0.0271967	0.0880639	1	1033	tags=20%, list=9%, signal=22%
GSE360_DC_VS_MAC_B_MALAYI_HIGH_DOSE_DN	GSE360_DC_VS_MAC_B_MALAYI_HIGH_DOSE_DN		150	-0.362896	-1.50526	0.00445434	0.0880898	1	1880	tags=27%, list=16%, signal=32%
BAKKER_FOXO3_TARGETS_UP	BAKKER_FOXO3_TARGETS_UP		47	-0.447502	-1.50516	0.0224033	0.088115	1	1929	tags=34%, list=17%, signal=41%
TGTGTGA_MIR377	TGTGTGA_MIR377		141	-0.367196	-1.50458	0.0114155	0.0884501	1	1535	tags=20%, list=13%, signal=23%
GO_POSITIVE_REGULATION_OF_ALPHA_BETA_T_CELL_PROLIFERATION	GO_POSITIVE_REGULATION_OF_ALPHA_BETA_T_CELL_PROLIFERATION		15	-0.578126	-1.5045	0.0514403	0.0884445	1	889	tags=47%, list=8%, signal=50%
GSE6092_IFNG_VS_IFNG_AND_B_BURGDORFERI_INF_ENDOTHELIAL_CELL_DN	GSE6092_IFNG_VS_IFNG_AND_B_BURGDORFERI_INF_ENDOTHELIAL_CELL_DN		153	-0.365306	-1.50429	0.00894855	0.0885281	1	1675	tags=25%, list=14%, signal=29%
GO_POSITIVE_REGULATION_OF_CELL_DEATH	GO_POSITIVE_REGULATION_OF_CELL_DEATH		434	-0.319358	-1.50423	0	0.0885178	1	1389	tags=18%, list=12%, signal=20%
E2F1_UP.V1_DN	E2F1_UP.V1_DN		125	-0.375454	-1.50384	0.00475059	0.0887174	1	1808	tags=30%, list=16%, signal=35%
HSF1_01	HSF1_01		147	-0.359756	-1.50352	0.00225734	0.0888779	1	1900	tags=25%, list=16%, signal=30%
GO_POSITIVE_REGULATION_OF_ALPHA_BETA_T_CELL_ACTIVATION	GO_POSITIVE_REGULATION_OF_ALPHA_BETA_T_CELL_ACTIVATION		39	-0.461829	-1.5031	0.025641	0.0891054	1	889	tags=28%, list=8%, signal=30%
GO_NEGATIVE_REGULATION_OF_PEPTIDE_SECRETION	GO_NEGATIVE_REGULATION_OF_PEPTIDE_SECRETION		22	-0.524297	-1.50306	0.0467706	0.0890796	1	879	tags=18%, list=8%, signal=20%
GSE17974_0.5H_VS_72H_UNTREATED_IN_VITRO_CD4_TCELL_UP	GSE17974_0.5H_VS_72H_UNTREATED_IN_VITRO_CD4_TCELL_UP		141	-0.364497	-1.50302	0.00238663	0.0890583	1	777	tags=15%, list=7%, signal=16%
GO_REGULATION_OF_I_KAPPAB_KINASE_NF_KAPPAB_SIGNALING	GO_REGULATION_OF_I_KAPPAB_KINASE_NF_KAPPAB_SIGNALING		180	-0.35378	-1.50297	0.00222222	0.0890455	1	2247	tags=30%, list=19%, signal=37%
AP4_01	AP4_01		138	-0.368874	-1.50251	0.0022173	0.0893202	1	2087	tags=26%, list=18%, signal=31%
GSE25087_TREG_VS_TCONV_ADULT_UP	GSE25087_TREG_VS_TCONV_ADULT_UP		161	-0.359309	-1.50234	0.00674157	0.089384	1	2296	tags=28%, list=20%, signal=34%
GO_NEGATIVE_REGULATION_OF_LIPID_BIOSYNTHETIC_PROCESS	GO_NEGATIVE_REGULATION_OF_LIPID_BIOSYNTHETIC_PROCESS		27	-0.511535	-1.50206	0.0364465	0.0894995	1	1651	tags=30%, list=14%, signal=34%
GO_CELLULAR_RESPONSE_TO_VIRUS	GO_CELLULAR_RESPONSE_TO_VIRUS		18	-0.546903	-1.50152	0.0539419	0.0898359	1	1527	tags=39%, list=13%, signal=45%
GSE7768_OVA_ALONE_VS_OVA_WITH_LPS_IMMUNIZED_MOUSE_WHOLE_SPLEEN_6H_DN	GSE7768_OVA_ALONE_VS_OVA_WITH_LPS_IMMUNIZED_MOUSE_WHOLE_SPLEEN_6H_DN		130	-0.368106	-1.50147	0.00447427	0.0898151	1	1950	tags=28%, list=17%, signal=33%
GSE20366_EX_VIVO_VS_DEC205_CONVERSION_NAIVE_CD4_TCELL_DN	GSE20366_EX_VIVO_VS_DEC205_CONVERSION_NAIVE_CD4_TCELL_DN		105	-0.383353	-1.50105	0.00447427	0.0900693	1	2077	tags=27%, list=18%, signal=32%
XU_HGF_SIGNALING_NOT_VIA_AKT1_6HR	XU_HGF_SIGNALING_NOT_VIA_AKT1_6HR		19	-0.535242	-1.50098	0.0365591	0.0900718	1	1949	tags=47%, list=17%, signal=57%
GO_REGULATION_OF_MUSCLE_SYSTEM_PROCESS	GO_REGULATION_OF_MUSCLE_SYSTEM_PROCESS		100	-0.385326	-1.50058	0.0180587	0.0903093	1	1632	tags=28%, list=14%, signal=32%
GSE29618_BCELL_VS_MDC_DN	GSE29618_BCELL_VS_MDC_DN		173	-0.352734	-1.50051	0.00233645	0.0903057	1	1530	tags=25%, list=13%, signal=29%
RORIE_TARGETS_OF_EWSR1_FLI1_FUSION_UP	RORIE_TARGETS_OF_EWSR1_FLI1_FUSION_UP		22	-0.52338	-1.50043	0.0465632	0.0903073	1	3175	tags=55%, list=27%, signal=75%
GSE42021_TCONV_PLN_VS_CD24HI_TCONV_THYMUS_DN	GSE42021_TCONV_PLN_VS_CD24HI_TCONV_THYMUS_DN		138	-0.359874	-1.49977	0.00428265	0.0907211	1	1355	tags=21%, list=12%, signal=24%
GO_REGULATION_OF_FATTY_ACID_OXIDATION	GO_REGULATION_OF_FATTY_ACID_OXIDATION		17	-0.560053	-1.49958	0.0529661	0.0908034	1	238	tags=18%, list=2%, signal=18%
GO_POSITIVE_REGULATION_OF_MUSCLE_CONTRACTION	GO_POSITIVE_REGULATION_OF_MUSCLE_CONTRACTION		21	-0.514363	-1.49944	0.0506073	0.0908471	1	1632	tags=43%, list=14%, signal=50%
GSE17721_POLYIC_VS_CPG_2H_BMDC_DN	GSE17721_POLYIC_VS_CPG_2H_BMDC_DN		131	-0.363068	-1.49923	0.00686499	0.0909392	1	1633	tags=24%, list=14%, signal=27%
GSE36476_CTRL_VS_TSST_ACT_40H_MEMORY_CD4_TCELL_YOUNG_UP	GSE36476_CTRL_VS_TSST_ACT_40H_MEMORY_CD4_TCELL_YOUNG_UP		160	-0.360128	-1.4988	0.0115207	0.0911747	1	2004	tags=28%, list=17%, signal=33%
KEGG_STEROID_BIOSYNTHESIS	KEGG_STEROID_BIOSYNTHESIS		16	-0.553968	-1.4984	0.0604027	0.0913898	1	3354	tags=63%, list=29%, signal=88%
GSE1460_INTRATHYMIC_T_PROGENITOR_VS_DP_THYMOCYTE_DN	GSE1460_INTRATHYMIC_T_PROGENITOR_VS_DP_THYMOCYTE_DN		135	-0.366645	-1.49837	0.00226757	0.0913636	1	1213	tags=21%, list=10%, signal=23%
GO_CLATHRIN_MEDIATED_ENDOCYTOSIS	GO_CLATHRIN_MEDIATED_ENDOCYTOSIS		20	-0.528976	-1.49814	0.0537634	0.0914666	1	750	tags=30%, list=6%, signal=32%
GSE22935_UNSTIM_VS_12H_MBOVIS_BCG_STIM_MYD88_KO_MACROPHAGE_UP	GSE22935_UNSTIM_VS_12H_MBOVIS_BCG_STIM_MYD88_KO_MACROPHAGE_UP		116	-0.371472	-1.49771	0.00439561	0.0916959	1	2168	tags=28%, list=19%, signal=34%
GSE24814_STAT5_KO_VS_WT_PRE_BCELL_UP	GSE24814_STAT5_KO_VS_WT_PRE_BCELL_UP		78	-0.399905	-1.49745	0.0125261	0.0918336	1	938	tags=19%, list=8%, signal=21%
GSE3039_B2_VS_B1_BCELL_UP	GSE3039_B2_VS_B1_BCELL_UP		134	-0.367219	-1.4974	0.00481928	0.0918224	1	1847	tags=29%, list=16%, signal=34%
GSE17301_CTRL_VS_48H_ACD3_ACD28_STIM_CD8_TCELL_DN	GSE17301_CTRL_VS_48H_ACD3_ACD28_STIM_CD8_TCELL_DN		150	-0.36391	-1.49736	0.00458716	0.0917976	1	1835	tags=27%, list=16%, signal=32%
SAGIV_CD24_TARGETS_DN	SAGIV_CD24_TARGETS_DN		31	-0.478025	-1.49732	0.0455581	0.0917886	1	1192	tags=19%, list=10%, signal=22%
GO_INACTIVATION_OF_MAPK_ACTIVITY	GO_INACTIVATION_OF_MAPK_ACTIVITY		21	-0.542246	-1.49732	0.0444915	0.0917398	1	1643	tags=43%, list=14%, signal=50%
GSE1448_ANTI_VALPHA2_VS_VBETA5_DP_THYMOCYTE_DN	GSE1448_ANTI_VALPHA2_VS_VBETA5_DP_THYMOCYTE_DN		142	-0.35616	-1.4961	0	0.0925626	1	701	tags=13%, list=6%, signal=14%
GO_INTEGRIN_BINDING	GO_INTEGRIN_BINDING		57	-0.422658	-1.49595	0.029106	0.0926035	1	1530	tags=26%, list=13%, signal=30%
GSE24026_PD1_LIGATION_VS_CTRL_IN_ACT_TCELL_LINE_UP	GSE24026_PD1_LIGATION_VS_CTRL_IN_ACT_TCELL_LINE_UP		159	-0.36091	-1.49594	0	0.0925543	1	1315	tags=22%, list=11%, signal=24%
GO_POSITIVE_REGULATION_OF_MONOOXYGENASE_ACTIVITY	GO_POSITIVE_REGULATION_OF_MONOOXYGENASE_ACTIVITY		19	-0.541451	-1.49581	0.0360169	0.0925854	1	736	tags=21%, list=6%, signal=22%
GSE28726_ACT_CD4_TCELL_VS_ACT_NKTCELL_DN	GSE28726_ACT_CD4_TCELL_VS_ACT_NKTCELL_DN		170	-0.355799	-1.49547	0.00235294	0.0927574	1	2153	tags=32%, list=19%, signal=39%
GSE22935_UNSTIM_VS_24H_MBOVIS_BCG_STIM_MYD88_KO_MACROPHAGE_DN	GSE22935_UNSTIM_VS_24H_MBOVIS_BCG_STIM_MYD88_KO_MACROPHAGE_DN		106	-0.380407	-1.49537	0.00436681	0.0927787	1	1496	tags=19%, list=13%, signal=21%
GO_CELLULAR_RESPONSE_TO_INORGANIC_SUBSTANCE	GO_CELLULAR_RESPONSE_TO_INORGANIC_SUBSTANCE		89	-0.385914	-1.49516	0.00672646	0.0928728	1	1035	tags=18%, list=9%, signal=20%
GSE2770_UNTREATED_VS_IL12_TREATED_ACT_CD4_TCELL_6H_UP	GSE2770_UNTREATED_VS_IL12_TREATED_ACT_CD4_TCELL_6H_UP		149	-0.362229	-1.49492	0.00683371	0.0930249	1	1984	tags=28%, list=17%, signal=33%
GO_NEGATIVE_REGULATION_OF_DEFENSE_RESPONSE	GO_NEGATIVE_REGULATION_OF_DEFENSE_RESPONSE		86	-0.39133	-1.49489	0.00909091	0.0929885	1	982	tags=19%, list=8%, signal=20%
GSE17721_PAM3CSK4_VS_CPG_2H_BMDC_DN	GSE17721_PAM3CSK4_VS_CPG_2H_BMDC_DN		136	-0.361654	-1.49458	0.00680272	0.0931659	1	2077	tags=26%, list=18%, signal=31%
GSE30971_2H_VS_4H_LPS_STIM_MACROPHAGE_WBP7_HET_DN	GSE30971_2H_VS_4H_LPS_STIM_MACROPHAGE_WBP7_HET_DN		72	-0.39737	-1.49437	0.010661	0.093248	1	1384	tags=24%, list=12%, signal=27%
GSE20727_ROS_INH_VS_ROS_INH_AND_DNFB_ALLERGEN_TREATED_DC_UP	GSE20727_ROS_INH_VS_ROS_INH_AND_DNFB_ALLERGEN_TREATED_DC_UP		151	-0.358584	-1.49435	0.00234192	0.0932196	1	2575	tags=34%, list=22%, signal=43%
GO_REGULATION_OF_FAT_CELL_DIFFERENTIATION	GO_REGULATION_OF_FAT_CELL_DIFFERENTIATION		57	-0.418134	-1.49422	0.0155902	0.0932571	1	1678	tags=25%, list=14%, signal=29%
HALLMARK_KRAS_SIGNALING_UP	HALLMARK_KRAS_SIGNALING_UP		113	-0.371772	-1.49416	0.00236407	0.0932519	1	1933	tags=28%, list=17%, signal=34%
GO_REGULATION_OF_NEUROTRANSMITTER_TRANSPORT	GO_REGULATION_OF_NEUROTRANSMITTER_TRANSPORT		31	-0.471973	-1.49415	0.0436681	0.0932065	1	866	tags=23%, list=7%, signal=24%
GO_NEGATIVE_REGULATION_OF_VIRAL_TRANSCRIPTION	GO_NEGATIVE_REGULATION_OF_VIRAL_TRANSCRIPTION		16	-0.570953	-1.49343	0.05074	0.0936325	1	113	tags=13%, list=1%, signal=13%
GSE339_CD4POS_VS_CD8POS_DC_IN_CULTURE_UP	GSE339_CD4POS_VS_CD8POS_DC_IN_CULTURE_UP		147	-0.357245	-1.49326	0.00465116	0.0936948	1	2004	tags=29%, list=17%, signal=35%
VANASSE_BCL2_TARGETS_DN	VANASSE_BCL2_TARGETS_DN		55	-0.418142	-1.49324	0.0242291	0.0936589	1	1999	tags=33%, list=17%, signal=39%
GSE20366_EX_VIVO_VS_DEC205_CONVERSION_DN	GSE20366_EX_VIVO_VS_DEC205_CONVERSION_DN		147	-0.359316	-1.49244	0.0046083	0.094169	1	2004	tags=24%, list=17%, signal=29%
NAKAMURA_METASTASIS_MODEL_DN	NAKAMURA_METASTASIS_MODEL_DN		23	-0.52317	-1.49228	0.05	0.0942335	1	1514	tags=35%, list=13%, signal=40%
GO_UROGENITAL_SYSTEM_DEVELOPMENT	GO_UROGENITAL_SYSTEM_DEVELOPMENT		136	-0.366778	-1.49227	0.00680272	0.0941884	1	1662	tags=22%, list=14%, signal=25%
GSE5679_PPARG_LIGAND_ROSIGLITAZONE_VS_ROSIGLITAZONE_AND_RARA_AGONIST_AM580_TREATED_DC_UP	GSE5679_PPARG_LIGAND_ROSIGLITAZONE_VS_ROSIGLITAZONE_AND_RARA_AGONIST_AM580_TREATED_DC_UP		162	-0.353362	-1.49212	0.00928074	0.0942383	1	2029	tags=26%, list=18%, signal=31%
SWEET_KRAS_ONCOGENIC_SIGNATURE	SWEET_KRAS_ONCOGENIC_SIGNATURE		72	-0.411079	-1.49164	0.0222222	0.0945198	1	2280	tags=35%, list=20%, signal=43%
GSE22140_HEALTHY_VS_ARTHRITIC_MOUSE_CD4_TCELL_UP	GSE22140_HEALTHY_VS_ARTHRITIC_MOUSE_CD4_TCELL_UP		159	-0.360418	-1.49151	0.00686499	0.0945577	1	1382	tags=25%, list=12%, signal=27%
RADMACHER_AML_PROGNOSIS	RADMACHER_AML_PROGNOSIS		54	-0.42892	-1.49141	0.0332594	0.0945851	1	1610	tags=30%, list=14%, signal=34%
GSE45382_UNTREATED_VS_TGFB_TREATED_MACROPHAGES_UP	GSE45382_UNTREATED_VS_TGFB_TREATED_MACROPHAGES_UP		165	-0.35161	-1.4911	0.0022779	0.0947587	1	1812	tags=25%, list=16%, signal=29%
GSE16385_ROSIGLITAZONE_IL4_VS_IFNG_TNF_STIM_MACROPHAGE_UP	GSE16385_ROSIGLITAZONE_IL4_VS_IFNG_TNF_STIM_MACROPHAGE_UP		164	-0.356291	-1.49108	0.00470588	0.0947231	1	1625	tags=28%, list=14%, signal=32%
KEGG_CYTOSOLIC_DNA_SENSING_PATHWAY	KEGG_CYTOSOLIC_DNA_SENSING_PATHWAY		40	-0.440954	-1.49071	0.027088	0.0949371	1	711	tags=13%, list=6%, signal=13%
GO_POSITIVE_REGULATION_OF_ENDOTHELIAL_CELL_PROLIFERATION	GO_POSITIVE_REGULATION_OF_ENDOTHELIAL_CELL_PROLIFERATION		36	-0.465967	-1.49057	0.034632	0.0949806	1	884	tags=19%, list=8%, signal=21%
GO_RESPONSE_TO_ENDOPLASMIC_RETICULUM_STRESS	GO_RESPONSE_TO_ENDOPLASMIC_RETICULUM_STRESS		197	-0.344917	-1.49044	0	0.0950175	1	1997	tags=28%, list=17%, signal=33%
GSE41867_MEMORY_VS_EXHAUSTED_CD8_TCELL_DAY30_LCMV_UP	GSE41867_MEMORY_VS_EXHAUSTED_CD8_TCELL_DAY30_LCMV_UP		146	-0.364012	-1.49042	0.00660793	0.0949855	1	2732	tags=35%, list=24%, signal=45%
GO_POSITIVE_REGULATION_OF_T_CELL_MEDIATED_IMMUNITY	GO_POSITIVE_REGULATION_OF_T_CELL_MEDIATED_IMMUNITY		27	-0.502538	-1.49035	0.0425056	0.0949853	1	871	tags=30%, list=8%, signal=32%
GO_REGULATION_OF_SYNAPTIC_VESICLE_EXOCYTOSIS	GO_REGULATION_OF_SYNAPTIC_VESICLE_EXOCYTOSIS		15	-0.573867	-1.49028	0.0591966	0.0949792	1	546	tags=27%, list=5%, signal=28%
RODRIGUES_THYROID_CARCINOMA_DN	RODRIGUES_THYROID_CARCINOMA_DN		52	-0.425862	-1.49007	0.0232558	0.0950698	1	2398	tags=40%, list=21%, signal=51%
GSE24142_EARLY_THYMIC_PROGENITOR_VS_DN2_THYMOCYTE_FETAL_UP	GSE24142_EARLY_THYMIC_PROGENITOR_VS_DN2_THYMOCYTE_FETAL_UP		144	-0.360792	-1.48988	0	0.0951515	1	1803	tags=28%, list=16%, signal=32%
GSE40274_CTRL_VS_HELIOS_TRANSDUCED_ACTIVATED_CD4_TCELL_DN	GSE40274_CTRL_VS_HELIOS_TRANSDUCED_ACTIVATED_CD4_TCELL_DN		129	-0.364465	-1.48971	0.00938967	0.095211	1	2620	tags=34%, list=23%, signal=44%
GO_POSITIVE_REGULATION_OF_TRANSCRIPTION_FROM_RNA_POLYMERASE_II_PROMOTER_IN_RESPONSE_TO_STRESS	GO_POSITIVE_REGULATION_OF_TRANSCRIPTION_FROM_RNA_POLYMERASE_II_PROMOTER_IN_RESPONSE_TO_STRESS		19	-0.539204	-1.48959	0.0596708	0.095235	1	1973	tags=53%, list=17%, signal=63%
RUTELLA_RESPONSE_TO_HGF_VS_CSF2RB_AND_IL4_DN	RUTELLA_RESPONSE_TO_HGF_VS_CSF2RB_AND_IL4_DN		208	-0.342123	-1.4894	0.00448431	0.0953223	1	1392	tags=21%, list=12%, signal=24%
GSE37416_CTRL_VS_48H_F_TULARENSIS_LVS_NEUTROPHIL_UP	GSE37416_CTRL_VS_48H_F_TULARENSIS_LVS_NEUTROPHIL_UP		116	-0.372427	-1.48874	0.00925926	0.0957532	1	1117	tags=22%, list=10%, signal=24%
PID_FAK_PATHWAY	PID_FAK_PATHWAY		49	-0.422568	-1.48847	0.027027	0.0959196	1	2371	tags=37%, list=20%, signal=46%
GO_RESPONSE_TO_INTERFERON_ALPHA	GO_RESPONSE_TO_INTERFERON_ALPHA		17	-0.551847	-1.48838	0.0570265	0.0959412	1	982	tags=47%, list=8%, signal=51%
GSE360_CTRL_VS_T_GONDII_MAC_DN	GSE360_CTRL_VS_T_GONDII_MAC_DN		140	-0.361118	-1.48761	0.00877193	0.0964453	1	1004	tags=19%, list=9%, signal=21%
GSE17974_2H_VS_72H_UNTREATED_IN_VITRO_CD4_TCELL_UP	GSE17974_2H_VS_72H_UNTREATED_IN_VITRO_CD4_TCELL_UP		148	-0.357189	-1.48759	0.00665188	0.0964091	1	1523	tags=18%, list=13%, signal=21%
GO_HORMONE_TRANSPORT	GO_HORMONE_TRANSPORT		34	-0.464654	-1.48698	0.0424107	0.0967979	1	2453	tags=35%, list=21%, signal=45%
CEBALLOS_TARGETS_OF_TP53_AND_MYC_UP	CEBALLOS_TARGETS_OF_TP53_AND_MYC_UP		19	-0.530202	-1.48689	0.0529661	0.0968115	1	805	tags=26%, list=7%, signal=28%
GO_REGULATION_OF_OSSIFICATION	GO_REGULATION_OF_OSSIFICATION		85	-0.387448	-1.48674	0.00427351	0.0968718	1	2503	tags=34%, list=22%, signal=43%
GO_NEGATIVE_REGULATION_OF_IMMUNE_EFFECTOR_PROCESS	GO_NEGATIVE_REGULATION_OF_IMMUNE_EFFECTOR_PROCESS		65	-0.404743	-1.48667	0.0151844	0.0968715	1	1025	tags=22%, list=9%, signal=23%
GSE17721_LPS_VS_GARDIQUIMOD_12H_BMDC_DN	GSE17721_LPS_VS_GARDIQUIMOD_12H_BMDC_DN		153	-0.356402	-1.48637	0.00697674	0.0970292	1	1630	tags=22%, list=14%, signal=26%
HUNSBERGER_EXERCISE_REGULATED_GENES	HUNSBERGER_EXERCISE_REGULATED_GENES		19	-0.535123	-1.48623	0.0592255	0.0970954	1	546	tags=26%, list=5%, signal=28%
GO_REGULATION_OF_LEUKOCYTE_MIGRATION	GO_REGULATION_OF_LEUKOCYTE_MIGRATION		82	-0.394278	-1.48621	0.0179372	0.0970509	1	2597	tags=30%, list=22%, signal=39%
REACTOME_INTEGRIN_ALPHAIIB_BETA3_SIGNALING	REACTOME_INTEGRIN_ALPHAIIB_BETA3_SIGNALING		18	-0.556471	-1.48611	0.0507726	0.097068	1	1739	tags=33%, list=15%, signal=39%
COLIN_PILOCYTIC_ASTROCYTOMA_VS_GLIOBLASTOMA_UP	COLIN_PILOCYTIC_ASTROCYTOMA_VS_GLIOBLASTOMA_UP		15	-0.565579	-1.48598	0.0541126	0.0971077	1	1009	tags=33%, list=9%, signal=36%
GO_POSITIVE_REGULATION_OF_LYMPHOCYTE_MIGRATION	GO_POSITIVE_REGULATION_OF_LYMPHOCYTE_MIGRATION		16	-0.554094	-1.4859	0.0490405	0.0971306	1	871	tags=25%, list=8%, signal=27%
GSE17721_LPS_VS_GARDIQUIMOD_4H_BMDC_UP	GSE17721_LPS_VS_GARDIQUIMOD_4H_BMDC_UP		139	-0.366837	-1.48539	0.00452489	0.0974427	1	1675	tags=24%, list=14%, signal=28%
GSE17580_UNINFECTED_VS_S_MANSONI_INF_TREG_UP	GSE17580_UNINFECTED_VS_S_MANSONI_INF_TREG_UP		158	-0.351657	-1.48539	0.00438597	0.0973952	1	2164	tags=31%, list=19%, signal=38%
GSE7852_LN_VS_FAT_TREG_DN	GSE7852_LN_VS_FAT_TREG_DN		145	-0.359839	-1.48522	0.00684931	0.0974587	1	1740	tags=20%, list=15%, signal=23%
BOYLAN_MULTIPLE_MYELOMA_D_DN	BOYLAN_MULTIPLE_MYELOMA_D_DN		59	-0.416706	-1.48509	0.0247748	0.0975038	1	1989	tags=34%, list=17%, signal=41%
GSE30083_SP1_VS_SP2_THYMOCYTE_DN	GSE30083_SP1_VS_SP2_THYMOCYTE_DN		98	-0.380043	-1.48507	0.00913242	0.0974652	1	1313	tags=20%, list=11%, signal=23%
GSE17974_0H_VS_6H_IN_VITRO_ACT_CD4_TCELL_UP	GSE17974_0H_VS_6H_IN_VITRO_ACT_CD4_TCELL_UP		142	-0.359923	-1.48504	0.00873363	0.0974405	1	1616	tags=23%, list=14%, signal=27%
DORN_ADENOVIRUS_INFECTION_32HR_DN	DORN_ADENOVIRUS_INFECTION_32HR_DN		29	-0.483591	-1.48483	0.055814	0.097572	1	489	tags=21%, list=4%, signal=22%
SENESE_HDAC1_AND_HDAC2_TARGETS_UP	SENESE_HDAC1_AND_HDAC2_TARGETS_UP		152	-0.354044	-1.48476	0.00656455	0.097572	1	1892	tags=24%, list=16%, signal=28%
KIM_PTEN_TARGETS_UP	KIM_PTEN_TARGETS_UP		15	-0.559743	-1.4846	0.0712788	0.0976221	1	45	tags=13%, list=0%, signal=13%
GO_ATPASE_COUPLED_ION_TRANSMEMBRANE_TRANSPORTER_ACTIVITY	GO_ATPASE_COUPLED_ION_TRANSMEMBRANE_TRANSPORTER_ACTIVITY		46	-0.434444	-1.48451	0.0293454	0.0976417	1	1560	tags=30%, list=13%, signal=35%
GSE41176_WT_VS_TAK1_KO_ANTI_IGM_STIM_BCELL_24H_UP	GSE41176_WT_VS_TAK1_KO_ANTI_IGM_STIM_BCELL_24H_UP		177	-0.346417	-1.48424	0.00446429	0.0977724	1	1991	tags=27%, list=17%, signal=32%
GO_POSITIVE_REGULATION_OF_PHAGOCYTOSIS	GO_POSITIVE_REGULATION_OF_PHAGOCYTOSIS		26	-0.50229	-1.48417	0.0555556	0.0977709	1	1015	tags=23%, list=9%, signal=25%
GO_STEROL_BIOSYNTHETIC_PROCESS	GO_STEROL_BIOSYNTHETIC_PROCESS		32	-0.480782	-1.48416	0.0426439	0.0977273	1	2743	tags=53%, list=24%, signal=69%
CEBP_Q3	CEBP_Q3		146	-0.352919	-1.48399	0.00717703	0.0978066	1	1438	tags=23%, list=12%, signal=25%
KEGG_B_CELL_RECEPTOR_SIGNALING_PATHWAY	KEGG_B_CELL_RECEPTOR_SIGNALING_PATHWAY		69	-0.408815	-1.48383	0.0183486	0.0978543	1	1915	tags=26%, list=17%, signal=31%
SMID_BREAST_CANCER_BASAL_DN	SMID_BREAST_CANCER_BASAL_DN		337	-0.324945	-1.48365	0	0.097949	1	1695	tags=21%, list=15%, signal=24%
GO_DIGESTIVE_TRACT_MORPHOGENESIS	GO_DIGESTIVE_TRACT_MORPHOGENESIS		20	-0.517229	-1.48361	0.0549451	0.0979293	1	1081	tags=35%, list=9%, signal=39%
LANDIS_ERBB2_BREAST_TUMORS_324_UP	LANDIS_ERBB2_BREAST_TUMORS_324_UP		111	-0.372076	-1.48354	0.0136364	0.0979311	1	1384	tags=23%, list=12%, signal=26%
GO_OXIDOREDUCTASE_ACTIVITY_ACTING_ON_THE_CH_CH_GROUP_OF_DONORS_NAD_OR_NADP_AS_ACCEPTOR	GO_OXIDOREDUCTASE_ACTIVITY_ACTING_ON_THE_CH_CH_GROUP_OF_DONORS_NAD_OR_NADP_AS_ACCEPTOR		16	-0.558753	-1.48325	0.0709382	0.098095	1	2605	tags=38%, list=22%, signal=48%
ZHANG_TLX_TARGETS_60HR_UP	ZHANG_TLX_TARGETS_60HR_UP		191	-0.345182	-1.48315	0.00240385	0.0981104	1	1529	tags=22%, list=13%, signal=25%
GO_STEROID_HORMONE_RECEPTOR_ACTIVITY	GO_STEROID_HORMONE_RECEPTOR_ACTIVITY		29	-0.479819	-1.48281	0.0518359	0.0983029	1	981	tags=21%, list=8%, signal=23%
BIOCARTA_EGF_PATHWAY	BIOCARTA_EGF_PATHWAY		29	-0.48578	-1.4828	0.0398323	0.0982621	1	498	tags=14%, list=4%, signal=14%
GO_REGULATION_OF_LYMPHOCYTE_MIGRATION	GO_REGULATION_OF_LYMPHOCYTE_MIGRATION		20	-0.528445	-1.4826	0.055102	0.0983498	1	871	tags=20%, list=8%, signal=22%
BIOCARTA_TID_PATHWAY	BIOCARTA_TID_PATHWAY		17	-0.541303	-1.4826	0.067623	0.098301	1	817	tags=24%, list=7%, signal=25%
GSE7831_1H_VS_4H_INFLUENZA_STIM_PDC_UP	GSE7831_1H_VS_4H_INFLUENZA_STIM_PDC_UP		148	-0.356284	-1.48252	0.00881057	0.0983085	1	1841	tags=28%, list=16%, signal=33%
DELYS_THYROID_CANCER_DN	DELYS_THYROID_CANCER_DN		108	-0.376398	-1.48235	0.0045977	0.0983888	1	705	tags=13%, list=6%, signal=14%
GO_RESPONSE_TO_DRUG	GO_RESPONSE_TO_DRUG		261	-0.333873	-1.4823	0.00246914	0.098371	1	1155	tags=16%, list=10%, signal=17%
GO_DENDRITIC_SHAFT	GO_DENDRITIC_SHAFT		18	-0.552446	-1.48211	0.0591966	0.0984388	1	3627	tags=61%, list=31%, signal=89%
IK2_01	IK2_01		146	-0.359098	-1.482	0.0046729	0.0984764	1	1482	tags=23%, list=13%, signal=26%
GSE28737_FOLLICULAR_VS_MARGINAL_ZONE_BCELL_BCL6_HET_DN	GSE28737_FOLLICULAR_VS_MARGINAL_ZONE_BCELL_BCL6_HET_DN		119	-0.371411	-1.48176	0.00917431	0.0986089	1	1996	tags=29%, list=17%, signal=34%
GSE5589_LPS_AND_IL10_VS_LPS_AND_IL6_STIM_IL6_KO_MACROPHAGE_45MIN_UP	GSE5589_LPS_AND_IL10_VS_LPS_AND_IL6_STIM_IL6_KO_MACROPHAGE_45MIN_UP		149	-0.354504	-1.48145	0.00677201	0.0987506	1	1841	tags=27%, list=16%, signal=32%
GSE19512_NAUTRAL_VS_INDUCED_TREG_DN	GSE19512_NAUTRAL_VS_INDUCED_TREG_DN		123	-0.368984	-1.48123	0.00493827	0.0988562	1	1382	tags=20%, list=12%, signal=22%
GO_NEGATIVE_REGULATION_OF_CELL_ADHESION	GO_NEGATIVE_REGULATION_OF_CELL_ADHESION		150	-0.353774	-1.48123	0.00441501	0.0988088	1	2543	tags=35%, list=22%, signal=44%
APPEL_IMATINIB_RESPONSE	APPEL_IMATINIB_RESPONSE		26	-0.501086	-1.48119	0.0337079	0.0987801	1	1695	tags=46%, list=15%, signal=54%
GO_REGULATION_OF_NF_KAPPAB_IMPORT_INTO_NUCLEUS	GO_REGULATION_OF_NF_KAPPAB_IMPORT_INTO_NUCLEUS		32	-0.468618	-1.48095	0.0443975	0.0989087	1	793	tags=22%, list=7%, signal=23%
GO_LIPID_HOMEOSTASIS	GO_LIPID_HOMEOSTASIS		63	-0.408885	-1.48083	0.0280172	0.0989559	1	1384	tags=24%, list=12%, signal=27%
TSAI_RESPONSE_TO_IONIZING_RADIATION	TSAI_RESPONSE_TO_IONIZING_RADIATION		118	-0.369966	-1.48068	0.0115207	0.0990232	1	649	tags=15%, list=6%, signal=16%
GO_REGULATION_OF_CYTOSOLIC_CALCIUM_ION_CONCENTRATION	GO_REGULATION_OF_CYTOSOLIC_CALCIUM_ION_CONCENTRATION		87	-0.388202	-1.48023	0.0201794	0.0993115	1	2381	tags=30%, list=21%, signal=37%
WORSCHECH_TUMOR_EVASION_AND_TOLEROGENICITY_UP	WORSCHECH_TUMOR_EVASION_AND_TOLEROGENICITY_UP		20	-0.531567	-1.47975	0.0492505	0.0996367	1	1189	tags=30%, list=10%, signal=33%
ABE_VEGFA_TARGETS_2HR	ABE_VEGFA_TARGETS_2HR		22	-0.517849	-1.47975	0.06875	0.0995884	1	1780	tags=45%, list=15%, signal=54%
GSE20366_CD103_POS_VS_CD103_KLRG1_DP_TREG_UP	GSE20366_CD103_POS_VS_CD103_KLRG1_DP_TREG_UP		116	-0.371013	-1.4794	0.00883002	0.0998159	1	894	tags=16%, list=8%, signal=17%
GO_DEFENSE_RESPONSE_TO_BACTERIUM	GO_DEFENSE_RESPONSE_TO_BACTERIUM		87	-0.384499	-1.47933	0.0154525	0.0998175	1	1380	tags=30%, list=12%, signal=34%
GSE360_L_MAJOR_VS_M_TUBERCULOSIS_DC_DN	GSE360_L_MAJOR_VS_M_TUBERCULOSIS_DC_DN		141	-0.360576	-1.47925	0.00488998	0.0998249	1	1972	tags=33%, list=17%, signal=39%
RODRIGUES_NTN1_TARGETS_DN	RODRIGUES_NTN1_TARGETS_DN		92	-0.386987	-1.47919	0.0139535	0.0998165	1	2735	tags=34%, list=24%, signal=44%
FLECHNER_PBL_KIDNEY_TRANSPLANT_OK_VS_DONOR_DN	FLECHNER_PBL_KIDNEY_TRANSPLANT_OK_VS_DONOR_DN		39	-0.457789	-1.47917	0.0425532	0.0997767	1	608	tags=18%, list=5%, signal=19%
YAO_TEMPORAL_RESPONSE_TO_PROGESTERONE_CLUSTER_5	YAO_TEMPORAL_RESPONSE_TO_PROGESTERONE_CLUSTER_5		16	-0.562477	-1.47878	0.0651261	0.100034	1	1243	tags=44%, list=11%, signal=49%
GO_POSITIVE_REGULATION_OF_NEURON_APOPTOTIC_PROCESS	GO_POSITIVE_REGULATION_OF_NEURON_APOPTOTIC_PROCESS		37	-0.459091	-1.47853	0.0351648	0.100191	1	1155	tags=19%, list=10%, signal=21%
GSE46242_CTRL_VS_EGR2_DELETED_TH1_CD4_TCELL_DN	GSE46242_CTRL_VS_EGR2_DELETED_TH1_CD4_TCELL_DN		99	-0.374303	-1.47808	0.00921659	0.100505	1	1249	tags=19%, list=11%, signal=21%
SUBTIL_PROGESTIN_TARGETS	SUBTIL_PROGESTIN_TARGETS		29	-0.477413	-1.47789	0.0512821	0.100591	1	1899	tags=38%, list=16%, signal=45%
GSE13306_TREG_VS_TCONV_LAMINA_PROPRIA_UP	GSE13306_TREG_VS_TCONV_LAMINA_PROPRIA_UP		140	-0.359438	-1.47783	0.00223714	0.100572	1	2173	tags=29%, list=19%, signal=36%
KAECH_NAIVE_VS_DAY15_EFF_CD8_TCELL_DN	KAECH_NAIVE_VS_DAY15_EFF_CD8_TCELL_DN		156	-0.352764	-1.47781	0.00235294	0.100532	1	1475	tags=25%, list=13%, signal=28%
GSE6090_UNSTIM_VS_DC_SIGN_STIM_DC_DN	GSE6090_UNSTIM_VS_DC_SIGN_STIM_DC_DN		46	-0.442684	-1.47771	0.0264901	0.100545	1	1279	tags=26%, list=11%, signal=29%
GSE29164_DAY3_VS_DAY7_UNTREATED_MELANOMA_UP	GSE29164_DAY3_VS_DAY7_UNTREATED_MELANOMA_UP		140	-0.356578	-1.47758	0.00678733	0.100591	1	1220	tags=19%, list=11%, signal=21%
GSE8515_IL1_VS_IL6_4H_STIM_MAC_UP	GSE8515_IL1_VS_IL6_4H_STIM_MAC_UP		151	-0.354352	-1.47752	0.00655022	0.100584	1	2058	tags=28%, list=18%, signal=34%
REACTOME_KERATAN_SULFATE_KERATIN_METABOLISM	REACTOME_KERATAN_SULFATE_KERATIN_METABOLISM		15	-0.57535	-1.47748	0.0630435	0.100565	1	2346	tags=47%, list=20%, signal=58%
GSE7831_CPG_VS_INFLUENZA_STIM_PDC_1H_DN	GSE7831_CPG_VS_INFLUENZA_STIM_PDC_1H_DN		132	-0.362806	-1.47715	0.0155211	0.100772	1	2242	tags=31%, list=19%, signal=38%
GO_NEURON_PROJECTION_MORPHOGENESIS	GO_NEURON_PROJECTION_MORPHOGENESIS		182	-0.342343	-1.47711	0.0022173	0.100746	1	2236	tags=27%, list=19%, signal=34%
GSE9650_EXHAUSTED_VS_MEMORY_CD8_TCELL_UP	GSE9650_EXHAUSTED_VS_MEMORY_CD8_TCELL_UP		119	-0.368764	-1.47692	0.00666667	0.100842	1	2765	tags=40%, list=24%, signal=52%
GSE22935_UNSTIM_VS_24H_MBOVIS_BCG_STIM_MACROPHAGE_UP	GSE22935_UNSTIM_VS_24H_MBOVIS_BCG_STIM_MACROPHAGE_UP		118	-0.367842	-1.47687	0.00925926	0.10082	1	1419	tags=22%, list=12%, signal=25%
CHIANG_LIVER_CANCER_SUBCLASS_CTNNB1_DN	CHIANG_LIVER_CANCER_SUBCLASS_CTNNB1_DN		93	-0.382282	-1.4762	0.0117925	0.101273	1	953	tags=18%, list=8%, signal=20%
CYCLIN_D1_KE_.V1_DN	CYCLIN_D1_KE_.V1_DN		96	-0.379287	-1.47613	0.0195122	0.101279	1	1455	tags=23%, list=13%, signal=26%
AKT_UP_MTOR_DN.V1_UP	AKT_UP_MTOR_DN.V1_UP		108	-0.37341	-1.47565	0.00694444	0.101582	1	2107	tags=33%, list=18%, signal=40%
GO_T_CELL_SELECTION	GO_T_CELL_SELECTION		25	-0.503052	-1.4756	0.0543933	0.101571	1	773	tags=32%, list=7%, signal=34%
GO_RESPONSE_TO_IRON_ION	GO_RESPONSE_TO_IRON_ION		21	-0.504255	-1.4756	0.0650759	0.101525	1	359	tags=14%, list=3%, signal=15%
VALK_AML_CLUSTER_4	VALK_AML_CLUSTER_4		21	-0.524866	-1.4753	0.0629067	0.101692	1	3131	tags=48%, list=27%, signal=65%
MODULE_165	MODULE_165		48	-0.432386	-1.47508	0.026087	0.101813	1	1863	tags=33%, list=16%, signal=40%
WU_SILENCED_BY_METHYLATION_IN_BLADDER_CANCER	WU_SILENCED_BY_METHYLATION_IN_BLADDER_CANCER		28	-0.476159	-1.475	0.0533333	0.101829	1	2044	tags=50%, list=18%, signal=61%
GO_REGULATION_OF_SEQUENCE_SPECIFIC_DNA_BINDING_TRANSCRIPTION_FACTOR_ACTIVITY	GO_REGULATION_OF_SEQUENCE_SPECIFIC_DNA_BINDING_TRANSCRIPTION_FACTOR_ACTIVITY		241	-0.33424	-1.47481	0	0.101922	1	1924	tags=24%, list=17%, signal=29%
TGGTGCT_MIR29A_MIR29B_MIR29C	TGGTGCT_MIR29A_MIR29B_MIR29C		346	-0.320429	-1.47481	0	0.101872	1	1777	tags=22%, list=15%, signal=25%
GSE19923_E2A_KO_VS_HEB_AND_E2A_KO_DP_THYMOCYTE_UP	GSE19923_E2A_KO_VS_HEB_AND_E2A_KO_DP_THYMOCYTE_UP		148	-0.350237	-1.47451	0.0137931	0.102057	1	1912	tags=31%, list=17%, signal=37%
REACTOME_PHASE1_FUNCTIONALIZATION_OF_COMPOUNDS	REACTOME_PHASE1_FUNCTIONALIZATION_OF_COMPOUNDS		21	-0.525617	-1.47435	0.0485232	0.102134	1	2170	tags=48%, list=19%, signal=58%
GSE4984_UNTREATED_VS_VEHICLE_CTRL_TREATED_DC_UP	GSE4984_UNTREATED_VS_VEHICLE_CTRL_TREATED_DC_UP		114	-0.367435	-1.47434	0.0150862	0.102083	1	1587	tags=28%, list=14%, signal=32%
DIAZ_CHRONIC_MEYLOGENOUS_LEUKEMIA_DN	DIAZ_CHRONIC_MEYLOGENOUS_LEUKEMIA_DN		85	-0.385167	-1.47392	0.014218	0.102364	1	1616	tags=28%, list=14%, signal=33%
GO_CELL_ACTIVATION_INVOLVED_IN_IMMUNE_RESPONSE	GO_CELL_ACTIVATION_INVOLVED_IN_IMMUNE_RESPONSE		96	-0.38206	-1.47386	0.0149254	0.102358	1	1035	tags=19%, list=9%, signal=20%
GSE41867_DAY6_EFFECTOR_VS_DAY30_MEMORY_CD8_TCELL_LCMV_ARMSTRONG_UP	GSE41867_DAY6_EFFECTOR_VS_DAY30_MEMORY_CD8_TCELL_LCMV_ARMSTRONG_UP		170	-0.351291	-1.47375	0	0.102398	1	2004	tags=28%, list=17%, signal=34%
AP2ALPHA_01	AP2ALPHA_01		156	-0.358603	-1.47369	0.00226244	0.10239	1	2937	tags=34%, list=25%, signal=45%
GRUETZMANN_PANCREATIC_CANCER_DN	GRUETZMANN_PANCREATIC_CANCER_DN		142	-0.36142	-1.47358	0.00943396	0.102412	1	1610	tags=25%, list=14%, signal=29%
GSE4984_UNTREATED_VS_GALECTIN1_TREATED_DC_DN	GSE4984_UNTREATED_VS_GALECTIN1_TREATED_DC_DN		138	-0.356845	-1.47351	0.00911162	0.102411	1	2231	tags=30%, list=19%, signal=37%
KEGG_ARACHIDONIC_ACID_METABOLISM	KEGG_ARACHIDONIC_ACID_METABOLISM		22	-0.51372	-1.47338	0.0431818	0.102465	1	1802	tags=36%, list=16%, signal=43%
GO_POST_EMBRYONIC_DEVELOPMENT	GO_POST_EMBRYONIC_DEVELOPMENT		54	-0.419653	-1.4733	0.0320513	0.102472	1	507	tags=15%, list=4%, signal=15%
GSE9960_HEALTHY_VS_SEPSIS_PBMC_DN	GSE9960_HEALTHY_VS_SEPSIS_PBMC_DN		87	-0.385343	-1.47325	0.0135135	0.102469	1	2163	tags=28%, list=19%, signal=34%
MORI_PLASMA_CELL_DN	MORI_PLASMA_CELL_DN		23	-0.5061	-1.47317	0.0547046	0.102478	1	1138	tags=30%, list=10%, signal=34%
GSE36527_CD62L_HIGH_CD69_NEG_VS_CD62L_LOW_CD69_POS_TREG_KLRG1_NEG_DN	GSE36527_CD62L_HIGH_CD69_NEG_VS_CD62L_LOW_CD69_POS_TREG_KLRG1_NEG_DN		128	-0.364121	-1.47289	0.00884956	0.10264	1	1647	tags=22%, list=14%, signal=25%
GO_CORE_PROMOTER_BINDING	GO_CORE_PROMOTER_BINDING		109	-0.370252	-1.4728	0.0117647	0.102653	1	2120	tags=28%, list=18%, signal=33%
GSE16385_ROSIGLITAZONE_IL4_VS_IL4_ALONE_STIM_MACROPHAGE_12H_UP	GSE16385_ROSIGLITAZONE_IL4_VS_IL4_ALONE_STIM_MACROPHAGE_12H_UP		166	-0.349718	-1.47275	0.0070922	0.102638	1	1940	tags=29%, list=17%, signal=34%
HOFFMANN_IMMATURE_TO_MATURE_B_LYMPHOCYTE_UP	HOFFMANN_IMMATURE_TO_MATURE_B_LYMPHOCYTE_UP		31	-0.479495	-1.47215	0.0388548	0.103033	1	1487	tags=45%, list=13%, signal=52%
GO_SIGNAL_RELEASE	GO_SIGNAL_RELEASE		73	-0.395489	-1.47198	0.0223714	0.103118	1	1046	tags=21%, list=9%, signal=22%
GSE360_T_GONDII_VS_M_TUBERCULOSIS_MAC_DN	GSE360_T_GONDII_VS_M_TUBERCULOSIS_MAC_DN		123	-0.363482	-1.47166	0.0101626	0.10331	1	957	tags=18%, list=8%, signal=19%
GO_POSITIVE_REGULATION_OF_STRESS_ACTIVATED_PROTEIN_KINASE_SIGNALING_CASCADE	GO_POSITIVE_REGULATION_OF_STRESS_ACTIVATED_PROTEIN_KINASE_SIGNALING_CASCADE		98	-0.376217	-1.47151	0.00917431	0.103374	1	1181	tags=21%, list=10%, signal=24%
GSE24142_EARLY_THYMIC_PROGENITOR_VS_DN2_THYMOCYTE_UP	GSE24142_EARLY_THYMIC_PROGENITOR_VS_DN2_THYMOCYTE_UP		155	-0.349139	-1.4715	0.0118765	0.103329	1	2204	tags=34%, list=19%, signal=41%
GO_DECIDUALIZATION	GO_DECIDUALIZATION		15	-0.567362	-1.47126	0.0699589	0.103457	1	489	tags=33%, list=4%, signal=35%
MEL18_DN.V1_UP	MEL18_DN.V1_UP		77	-0.393992	-1.47126	0.0108225	0.103406	1	2052	tags=32%, list=18%, signal=39%
GO_PLASMA_MEMBRANE_ORGANIZATION	GO_PLASMA_MEMBRANE_ORGANIZATION		131	-0.355875	-1.47113	0.00700935	0.103454	1	1731	tags=27%, list=15%, signal=31%
CREB_02	CREB_02		185	-0.344851	-1.47111	0.00231482	0.103411	1	1556	tags=20%, list=13%, signal=23%
GSE16450_IMMATURE_VS_MATURE_NEURON_CELL_LINE_12H_IFNA_STIM_DN	GSE16450_IMMATURE_VS_MATURE_NEURON_CELL_LINE_12H_IFNA_STIM_DN		149	-0.356115	-1.47097	0.00686499	0.103476	1	2379	tags=34%, list=21%, signal=43%
GO_CELLULAR_RESPONSE_TO_PEPTIDE	GO_CELLULAR_RESPONSE_TO_PEPTIDE		179	-0.347565	-1.47089	0	0.103482	1	2292	tags=30%, list=20%, signal=36%
GSE1460_INTRATHYMIC_T_PROGENITOR_VS_NAIVE_CD4_TCELL_CORD_BLOOD_DN	GSE1460_INTRATHYMIC_T_PROGENITOR_VS_NAIVE_CD4_TCELL_CORD_BLOOD_DN		113	-0.373978	-1.47088	0.00896861	0.103437	1	1815	tags=22%, list=16%, signal=26%
GCM_HMGA2	GCM_HMGA2		57	-0.420045	-1.47052	0.032538	0.103676	1	939	tags=19%, list=8%, signal=21%
GO_CALCIUM_DEPENDENT_PHOSPHOLIPID_BINDING	GO_CALCIUM_DEPENDENT_PHOSPHOLIPID_BINDING		24	-0.499901	-1.47035	0.055914	0.103763	1	974	tags=33%, list=8%, signal=36%
GSE9650_GP33_VS_GP276_LCMV_SPECIFIC_EXHAUSTED_CD8_TCELL_UP	GSE9650_GP33_VS_GP276_LCMV_SPECIFIC_EXHAUSTED_CD8_TCELL_UP		108	-0.370394	-1.47014	0.0134529	0.103861	1	1951	tags=24%, list=17%, signal=29%
GSE10273_HIGH_VS_LOW_IL7_TREATED_IRF4_8_NULL_PRE_BCELL_UP	GSE10273_HIGH_VS_LOW_IL7_TREATED_IRF4_8_NULL_PRE_BCELL_UP		146	-0.350805	-1.46976	0.0022779	0.10409	1	1977	tags=27%, list=17%, signal=33%
PID_VEGFR1_PATHWAY	PID_VEGFR1_PATHWAY		20	-0.524664	-1.46965	0.0516854	0.10413	1	1917	tags=35%, list=17%, signal=42%
GO_GLYCOSYLATION	GO_GLYCOSYLATION		166	-0.350084	-1.46943	0.00229358	0.104237	1	1860	tags=25%, list=16%, signal=30%
GSE7460_WT_VS_FOXP3_HET_ACT_WITH_TGFB_TCONV_UP	GSE7460_WT_VS_FOXP3_HET_ACT_WITH_TGFB_TCONV_UP		133	-0.359651	-1.46921	0.0111607	0.104354	1	2084	tags=25%, list=18%, signal=30%
HEN1_02	HEN1_02		119	-0.367264	-1.46913	0.00225734	0.104362	1	1741	tags=25%, list=15%, signal=29%
ISRE_01	ISRE_01		165	-0.348485	-1.46886	0.0045045	0.104553	1	1395	tags=24%, list=12%, signal=27%
GSE11961_MEMORY_BCELL_DAY7_VS_GERMINAL_CENTER_BCELL_DAY40_DN	GSE11961_MEMORY_BCELL_DAY7_VS_GERMINAL_CENTER_BCELL_DAY40_DN		141	-0.354384	-1.46871	0.0045977	0.104605	1	1458	tags=20%, list=13%, signal=22%
GSE16385_ROSIGLITAZONE_IL4_VS_IL4_ALONE_STIM_MACROPHAGE_12H_DN	GSE16385_ROSIGLITAZONE_IL4_VS_IL4_ALONE_STIM_MACROPHAGE_12H_DN		159	-0.353278	-1.46859	0.0045977	0.104663	1	2141	tags=32%, list=18%, signal=39%
DELACROIX_RARG_BOUND_MEF	DELACROIX_RARG_BOUND_MEF		228	-0.33468	-1.46852	0	0.104658	1	1678	tags=23%, list=14%, signal=26%
GSE9509_LPS_VS_LPS_AND_IL10_STIM_IL10_KO_MACROPHAGE_30MIN_UP	GSE9509_LPS_VS_LPS_AND_IL10_STIM_IL10_KO_MACROPHAGE_30MIN_UP		124	-0.363721	-1.46848	0.00696056	0.104633	1	1860	tags=23%, list=16%, signal=28%
GSE16385_MONOCYTE_VS_12H_IL4_TREATED_MACROPHAGE_UP	GSE16385_MONOCYTE_VS_12H_IL4_TREATED_MACROPHAGE_UP		112	-0.368681	-1.46837	0.0117925	0.104661	1	2580	tags=30%, list=22%, signal=39%
GO_POSITIVE_REGULATION_OF_EPITHELIAL_CELL_PROLIFERATION	GO_POSITIVE_REGULATION_OF_EPITHELIAL_CELL_PROLIFERATION		75	-0.391608	-1.46826	0.0205011	0.104688	1	884	tags=16%, list=8%, signal=17%
ZHANG_BREAST_CANCER_PROGENITORS_DN	ZHANG_BREAST_CANCER_PROGENITORS_DN		111	-0.365345	-1.46807	0.0022779	0.104782	1	2447	tags=36%, list=21%, signal=45%
BIOCARTA_EDG1_PATHWAY	BIOCARTA_EDG1_PATHWAY		20	-0.516259	-1.46797	0.050813	0.10482	1	1695	tags=35%, list=15%, signal=41%
WANG_METHYLATED_IN_BREAST_CANCER	WANG_METHYLATED_IN_BREAST_CANCER		27	-0.48349	-1.4677	0.0604752	0.104967	1	850	tags=26%, list=7%, signal=28%
GO_NEGATIVE_REGULATION_OF_CELL_ACTIVATION	GO_NEGATIVE_REGULATION_OF_CELL_ACTIVATION		103	-0.372496	-1.46769	0.017316	0.104923	1	1737	tags=28%, list=15%, signal=33%
GSE22886_NAIVE_BCELL_VS_BM_PLASMA_CELL_DN	GSE22886_NAIVE_BCELL_VS_BM_PLASMA_CELL_DN		161	-0.355297	-1.46752	0.0144231	0.105008	1	1783	tags=25%, list=15%, signal=30%
GO_REGULATION_OF_SYNAPTIC_VESICLE_TRANSPORT	GO_REGULATION_OF_SYNAPTIC_VESICLE_TRANSPORT		20	-0.518487	-1.46752	0.0747253	0.104956	1	546	tags=20%, list=5%, signal=21%
CHR8Q24	CHR8Q24		85	-0.383283	-1.46743	0.0210773	0.104977	1	2046	tags=31%, list=18%, signal=37%
GSE2770_UNTREATED_VS_TGFB_AND_IL4_TREATED_ACT_CD4_TCELL_4H_UP	GSE2770_UNTREATED_VS_TGFB_AND_IL4_TREATED_ACT_CD4_TCELL_4H_UP		156	-0.352647	-1.46729	0.0138889	0.105009	1	1800	tags=26%, list=16%, signal=30%
[truncated: 6,303 more rows]
