# Supplementary material for: Integration of genomics and transcriptomics predicts diabetic retinopathy susceptibility genes
Source: eLife. 2020 Nov 9;9:e59980. doi: 10.7554/eLife.59980 (PMC7728435; doi:10.7554/eLife.59980)
Supplement: Figure 1—source data 5. [file elife-59980-fig1-data5.xlsx]

## Sheet: gsea_report_for_na_pos_15005678
NAME	GS<br> follow link to MSigDB	GS DETAILS	SIZE	ES	NES	NOM p-val	FDR q-val	FWER p-val	RANK AT MAX	LEADING EDGE
GO_DNA_PACKAGING_COMPLEX	GO_DNA_PACKAGING_COMPLEX	Details ...	77	0.675723	2.46674	0	0	0	1111	tags=43%, list=10%, signal=47%
GO_PROTEIN_DNA_COMPLEX	GO_PROTEIN_DNA_COMPLEX	Details ...	132	0.595818	2.34652	0	0	0	1516	tags=39%, list=13%, signal=45%
GO_NUCLEAR_NUCLEOSOME	GO_NUCLEAR_NUCLEOSOME	Details ...	28	0.752754	2.19533	0	0.000951614	0.004	996	tags=46%, list=9%, signal=51%
GO_DNA_PACKAGING	GO_DNA_PACKAGING	Details ...	142	0.531436	2.09407	0	0.00373001	0.021	1516	tags=34%, list=13%, signal=38%
GO_DNA_CONFORMATION_CHANGE	GO_DNA_CONFORMATION_CHANGE	Details ...	217	0.501219	2.08263	0	0.00340844	0.023	2234	tags=40%, list=19%, signal=49%
GO_CHROMATIN_ASSEMBLY_OR_DISASSEMBLY	GO_CHROMATIN_ASSEMBLY_OR_DISASSEMBLY	Details ...	135	0.529648	2.07741	0	0.00319659	0.026	1516	tags=32%, list=13%, signal=36%
GO_GLUTAMATE_METABOLIC_PROCESS	GO_GLUTAMATE_METABOLIC_PROCESS	Details ...	15	0.809525	2.05849	0	0.00376301	0.036	1010	tags=47%, list=9%, signal=51%
GO_CHROMATIN_SILENCING	GO_CHROMATIN_SILENCING	Details ...	69	0.574357	2.03091	0	0.0065822	0.071	1148	tags=33%, list=10%, signal=37%
GO_NEGATIVE_REGULATION_OF_CELL_DIVISION	GO_NEGATIVE_REGULATION_OF_CELL_DIVISION	Details ...	49	0.611383	2.0141	0	0.00840417	0.1	1164	tags=31%, list=10%, signal=34%
GO_PROTEIN_DNA_COMPLEX_SUBUNIT_ORGANIZATION	GO_PROTEIN_DNA_COMPLEX_SUBUNIT_ORGANIZATION	Details ...	181	0.496672	2.00791	0	0.00847851	0.111	2212	tags=38%, list=19%, signal=46%
GO_RNA_SPLICING_VIA_TRANSESTERIFICATION_REACTIONS	GO_RNA_SPLICING_VIA_TRANSESTERIFICATION_REACTIONS	Details ...	240	0.477698	2.00451	0	0.00835559	0.121	2416	tags=39%, list=21%, signal=48%
GO_MITOTIC_NUCLEAR_DIVISION	GO_MITOTIC_NUCLEAR_DIVISION	Details ...	293	0.461922	1.97963	0	0.0117061	0.181	2567	tags=40%, list=22%, signal=50%
GO_GENE_SILENCING	GO_GENE_SILENCING	Details ...	155	0.490188	1.96071	0	0.0147547	0.239	1148	tags=25%, list=10%, signal=28%
GO_TELOMERE_MAINTENANCE_VIA_RECOMBINATION	GO_TELOMERE_MAINTENANCE_VIA_RECOMBINATION	Details ...	29	0.662627	1.95639	0	0.0147208	0.254	3085	tags=59%, list=27%, signal=80%
GO_GLUTAMINE_FAMILY_AMINO_ACID_METABOLIC_PROCESS	GO_GLUTAMINE_FAMILY_AMINO_ACID_METABOLIC_PROCESS	Details ...	40	0.610952	1.95505	0	0.0139289	0.257	1097	tags=33%, list=9%, signal=36%
GO_DNA_REPLICATION	GO_DNA_REPLICATION	Details ...	170	0.487748	1.95191	0	0.0138983	0.271	2673	tags=43%, list=23%, signal=55%
GO_CHROMOSOMAL_REGION	GO_CHROMOSOMAL_REGION	Details ...	273	0.458781	1.94765	0	0.0137508	0.282	2532	tags=42%, list=22%, signal=52%
GO_MITOTIC_SISTER_CHROMATID_SEGREGATION	GO_MITOTIC_SISTER_CHROMATID_SEGREGATION	Details ...	80	0.537278	1.93815	0	0.0150413	0.317	2536	tags=46%, list=22%, signal=59%
GO_NUCLEAR_CHROMOSOME	GO_NUCLEAR_CHROMOSOME	Details ...	416	0.436321	1.9356	0	0.0147762	0.327	2284	tags=35%, list=20%, signal=42%
GO_REGULATION_OF_TELOMERASE_RNA_LOCALIZATION_TO_CAJAL_BODY	GO_REGULATION_OF_TELOMERASE_RNA_LOCALIZATION_TO_CAJAL_BODY	Details ...	15	0.760324	1.93208	0	0.0149224	0.344	1316	tags=60%, list=11%, signal=68%
GO_MITOTIC_CYTOKINESIS	GO_MITOTIC_CYTOKINESIS		25	0.67194	1.91759	0	0.0166813	0.395	1984	tags=48%, list=17%, signal=58%
GO_U12_TYPE_SPLICEOSOMAL_COMPLEX	GO_U12_TYPE_SPLICEOSOMAL_COMPLEX		24	0.678665	1.91279	0	0.0173819	0.423	1557	tags=46%, list=13%, signal=53%
GO_TELOMERE_ORGANIZATION	GO_TELOMERE_ORGANIZATION		91	0.518558	1.90667	0	0.0180193	0.454	1261	tags=31%, list=11%, signal=34%
GO_NEGATIVE_REGULATION_OF_GENE_EXPRESSION_EPIGENETIC	GO_NEGATIVE_REGULATION_OF_GENE_EXPRESSION_EPIGENETIC		86	0.523233	1.89927	0	0.0194109	0.494	2177	tags=41%, list=19%, signal=50%
GO_SINGLE_STRANDED_DNA_BINDING	GO_SINGLE_STRANDED_DNA_BINDING		76	0.52988	1.89756	0	0.0191178	0.502	2190	tags=38%, list=19%, signal=47%
GO_ORGANELLE_FISSION	GO_ORGANELLE_FISSION		365	0.434606	1.89698	0	0.0185177	0.505	2686	tags=39%, list=23%, signal=50%
GO_CELL_DIVISION	GO_CELL_DIVISION		360	0.430353	1.89258	0	0.0188337	0.523	2567	tags=37%, list=22%, signal=46%
GO_PROTEIN_TETRAMERIZATION	GO_PROTEIN_TETRAMERIZATION		93	0.514238	1.89172	0	0.0184414	0.529	2339	tags=47%, list=20%, signal=59%
GO_GLUTAMINE_FAMILY_AMINO_ACID_CATABOLIC_PROCESS	GO_GLUTAMINE_FAMILY_AMINO_ACID_CATABOLIC_PROCESS		15	0.738105	1.87503	0.00187266	0.023378	0.626	1010	tags=33%, list=9%, signal=36%
GO_SISTER_CHROMATID_SEGREGATION	GO_SISTER_CHROMATID_SEGREGATION		150	0.471708	1.87035	0	0.0242342	0.657	2536	tags=42%, list=22%, signal=53%
GO_CONDENSED_CHROMOSOME_CENTROMERIC_REGION	GO_CONDENSED_CHROMOSOME_CENTROMERIC_REGION		82	0.516048	1.86722	0	0.0244645	0.669	2686	tags=51%, list=23%, signal=66%
GO_GENE_SILENCING_BY_RNA	GO_GENE_SILENCING_BY_RNA		108	0.494013	1.86641	0	0.0240789	0.675	893	tags=23%, list=8%, signal=25%
GO_CHROMATIN	GO_CHROMATIN		350	0.425931	1.85605	0	0.0272949	0.729	2195	tags=32%, list=19%, signal=38%
GO_DNA_DEPENDENT_DNA_REPLICATION	GO_DNA_DEPENDENT_DNA_REPLICATION		84	0.512921	1.85122	0	0.0279146	0.745	1876	tags=35%, list=16%, signal=41%
GO_CHROMATIN_SILENCING_AT_RDNA	GO_CHROMATIN_SILENCING_AT_RDNA		34	0.606798	1.84855	0.00189753	0.0281748	0.757	2177	tags=53%, list=19%, signal=65%
GO_ENDORIBONUCLEASE_ACTIVITY_PRODUCING_5_PHOSPHOMONOESTERS	GO_ENDORIBONUCLEASE_ACTIVITY_PRODUCING_5_PHOSPHOMONOESTERS		24	0.64385	1.8467	0.0019802	0.0279276	0.763	969	tags=42%, list=8%, signal=45%
GO_SPLICEOSOMAL_COMPLEX	GO_SPLICEOSOMAL_COMPLEX		154	0.464153	1.84469	0	0.0279797	0.775	2994	tags=47%, list=26%, signal=63%
GO_MRNA_PROCESSING	GO_MRNA_PROCESSING		358	0.420831	1.84282	0	0.0279006	0.783	2351	tags=34%, list=20%, signal=41%
GO_RNA_SPLICING	GO_RNA_SPLICING		316	0.42798	1.84125	0	0.0277701	0.792	2418	tags=35%, list=21%, signal=43%
GO_CYTOSKELETON_DEPENDENT_CYTOKINESIS	GO_CYTOSKELETON_DEPENDENT_CYTOKINESIS		31	0.608347	1.83407	0.0018622	0.0299619	0.83	2161	tags=42%, list=19%, signal=51%
GO_PROTEIN_HETEROTETRAMERIZATION	GO_PROTEIN_HETEROTETRAMERIZATION		29	0.630254	1.83299	0.00187617	0.0296488	0.833	1103	tags=38%, list=10%, signal=42%
GO_NUCLEAR_CHROMOSOME_SEGREGATION	GO_NUCLEAR_CHROMOSOME_SEGREGATION		173	0.452401	1.83149	0	0.0295038	0.838	2536	tags=40%, list=22%, signal=51%
GO_CONDENSED_CHROMOSOME	GO_CONDENSED_CHROMOSOME		151	0.461575	1.82867	0	0.0297476	0.852	2234	tags=42%, list=19%, signal=52%
GO_KINETOCHORE	GO_KINETOCHORE		101	0.479122	1.82861	0	0.0291043	0.852	2234	tags=41%, list=19%, signal=50%
GO_METAPHASE_PLATE_CONGRESSION	GO_METAPHASE_PLATE_CONGRESSION		38	0.574528	1.81129	0.00390625	0.036188	0.905	2234	tags=45%, list=19%, signal=55%
GO_DNA_REPLICATION_DEPENDENT_NUCLEOSOME_ORGANIZATION	GO_DNA_REPLICATION_DEPENDENT_NUCLEOSOME_ORGANIZATION		29	0.61087	1.80264	0.00385356	0.0391751	0.929	1592	tags=45%, list=14%, signal=52%
GO_AMINO_ACID_TRANSMEMBRANE_TRANSPORT	GO_AMINO_ACID_TRANSMEMBRANE_TRANSPORT		29	0.607191	1.79623	0.00378072	0.0414251	0.94	661	tags=28%, list=6%, signal=29%
GO_SMALL_NUCLEOLAR_RIBONUCLEOPROTEIN_COMPLEX	GO_SMALL_NUCLEOLAR_RIBONUCLEOPROTEIN_COMPLEX		17	0.680136	1.79331	0.00598802	0.0420491	0.95	969	tags=35%, list=8%, signal=38%
GO_NUCLEAR_CHROMATIN	GO_NUCLEAR_CHROMATIN		233	0.427772	1.78878	0	0.0434038	0.955	1297	tags=24%, list=11%, signal=27%
GO_RNA_HELICASE_ACTIVITY	GO_RNA_HELICASE_ACTIVITY		60	0.520429	1.78206	0	0.0462134	0.962	3258	tags=50%, list=28%, signal=69%
GO_CHROMOSOME_TELOMERIC_REGION	GO_CHROMOSOME_TELOMERIC_REGION		134	0.453643	1.78066	0	0.0461588	0.964	2194	tags=37%, list=19%, signal=45%
GO_POSITIVE_REGULATION_OF_DNA_REPAIR	GO_POSITIVE_REGULATION_OF_DNA_REPAIR		28	0.612287	1.77653	0.00192678	0.0476686	0.969	1813	tags=39%, list=16%, signal=46%
GO_DNA_SYNTHESIS_INVOLVED_IN_DNA_REPAIR	GO_DNA_SYNTHESIS_INVOLVED_IN_DNA_REPAIR		61	0.52369	1.77513	0.00189394	0.047522	0.97	2893	tags=51%, list=25%, signal=67%
GO_CELL_CYCLE_G2_M_PHASE_TRANSITION	GO_CELL_CYCLE_G2_M_PHASE_TRANSITION		121	0.462718	1.76954	0	0.0500847	0.977	2428	tags=38%, list=21%, signal=48%
GO_TELOMERE_MAINTENANCE_VIA_TELOMERE_LENGTHENING	GO_TELOMERE_MAINTENANCE_VIA_TELOMERE_LENGTHENING		22	0.635221	1.76833	0.00201207	0.0497697	0.977	2846	tags=64%, list=25%, signal=84%
GO_TELOMERE_MAINTENANCE_VIA_TELOMERASE	GO_TELOMERE_MAINTENANCE_VIA_TELOMERASE		15	0.697151	1.76791	0.00378072	0.0491478	0.978	1261	tags=47%, list=11%, signal=52%
GO_MITOTIC_RECOMBINATION	GO_MITOTIC_RECOMBINATION		38	0.565392	1.76465	0.00182482	0.0502209	0.982	3085	tags=55%, list=27%, signal=75%
GO_CHROMOSOME_SEGREGATION	GO_CHROMOSOME_SEGREGATION		213	0.43118	1.76316	0	0.0501062	0.984	2784	tags=42%, list=24%, signal=54%
GO_CELL_CYCLE_PHASE_TRANSITION	GO_CELL_CYCLE_PHASE_TRANSITION		217	0.423462	1.76305	0	0.0493301	0.984	2428	tags=34%, list=21%, signal=42%
GO_REGULATION_OF_DNA_REPAIR	GO_REGULATION_OF_DNA_REPAIR		58	0.515123	1.75734	0	0.0515501	0.985	2191	tags=36%, list=19%, signal=44%
GO_RIBONUCLEOPROTEIN_COMPLEX_SUBUNIT_ORGANIZATION	GO_RIBONUCLEOPROTEIN_COMPLEX_SUBUNIT_ORGANIZATION		169	0.436233	1.74816	0	0.0560602	0.991	2204	tags=35%, list=19%, signal=42%
GO_SPLICEOSOMAL_SNRNP_ASSEMBLY	GO_SPLICEOSOMAL_SNRNP_ASSEMBLY		33	0.569111	1.74609	0	0.0566014	0.992	1794	tags=36%, list=15%, signal=43%
GO_RNA_POLYMERASE_ACTIVITY	GO_RNA_POLYMERASE_ACTIVITY		42	0.544364	1.72936	0	0.0668871	0.999	3163	tags=57%, list=27%, signal=78%
GO_NEGATIVE_REGULATION_OF_CELLULAR_PROTEIN_CATABOLIC_PROCESS	GO_NEGATIVE_REGULATION_OF_CELLULAR_PROTEIN_CATABOLIC_PROCESS		46	0.531683	1.72748	0.00186567	0.0670968	0.999	3329	tags=57%, list=29%, signal=79%
GO_DNA_BIOSYNTHETIC_PROCESS	GO_DNA_BIOSYNTHETIC_PROCESS		99	0.463213	1.72268	0	0.0692553	1	2893	tags=47%, list=25%, signal=63%
GO_TRANSCRIPTION_COUPLED_NUCLEOTIDE_EXCISION_REPAIR	GO_TRANSCRIPTION_COUPLED_NUCLEOTIDE_EXCISION_REPAIR		70	0.493195	1.72075	0	0.0695445	1	2960	tags=54%, list=26%, signal=72%
GO_DNA_GEOMETRIC_CHANGE	GO_DNA_GEOMETRIC_CHANGE		77	0.470806	1.71953	0	0.0693557	1	2212	tags=42%, list=19%, signal=51%
GO_RNA_SECONDARY_STRUCTURE_UNWINDING	GO_RNA_SECONDARY_STRUCTURE_UNWINDING		37	0.54427	1.7185	0.00562852	0.068963	1	3666	tags=65%, list=32%, signal=95%
GO_NUCLEOLAR_PART	GO_NUCLEOLAR_PART		54	0.502358	1.71815	0.00187266	0.0683032	1	969	tags=26%, list=8%, signal=28%
GO_NUCLEAR_CHROMOSOME_TELOMERIC_REGION	GO_NUCLEAR_CHROMOSOME_TELOMERIC_REGION		111	0.450442	1.71436	0	0.0703039	1	2194	tags=37%, list=19%, signal=45%
GO_CHROMOSOME_CENTROMERIC_REGION	GO_CHROMOSOME_CENTROMERIC_REGION		147	0.434729	1.70791	0	0.0743171	1	2759	tags=45%, list=24%, signal=58%
GO_DNA_REPAIR	GO_DNA_REPAIR		394	0.38503	1.70482	0	0.0757707	1	2365	tags=33%, list=20%, signal=40%
GO_DNA_REPLICATION_INITIATION	GO_DNA_REPLICATION_INITIATION		27	0.593749	1.70324	0.00196464	0.0759425	1	1876	tags=37%, list=16%, signal=44%
GO_NUCLEOCYTOPLASMIC_TRANSPORTER_ACTIVITY	GO_NUCLEOCYTOPLASMIC_TRANSPORTER_ACTIVITY		22	0.606596	1.70288	0.011236	0.0752252	1	187	tags=18%, list=2%, signal=18%
GO_DNA_STRAND_ELONGATION	GO_DNA_STRAND_ELONGATION		27	0.588153	1.70175	0.00194932	0.0751643	1	2561	tags=52%, list=22%, signal=66%
GO_CHROMATIN_ORGANIZATION	GO_CHROMATIN_ORGANIZATION		496	0.377707	1.70041	0	0.0753087	1	2195	tags=27%, list=19%, signal=31%
GO_ANAPHASE_PROMOTING_COMPLEX	GO_ANAPHASE_PROMOTING_COMPLEX		17	0.635819	1.69546	0.011194	0.0782774	1	2559	tags=47%, list=22%, signal=60%
GO_DNA_STRAND_ELONGATION_INVOLVED_IN_DNA_REPLICATION	GO_DNA_STRAND_ELONGATION_INVOLVED_IN_DNA_REPLICATION		24	0.597585	1.69357	0.00594059	0.079054	1	2561	tags=54%, list=22%, signal=69%
GO_PURINE_NTP_DEPENDENT_HELICASE_ACTIVITY	GO_PURINE_NTP_DEPENDENT_HELICASE_ACTIVITY		87	0.465442	1.69086	0	0.0802405	1	3258	tags=49%, list=28%, signal=68%
GO_NEGATIVE_REGULATION_OF_NUCLEAR_DIVISION	GO_NEGATIVE_REGULATION_OF_NUCLEAR_DIVISION		38	0.537438	1.68677	0.00905797	0.0826408	1	1983	tags=37%, list=17%, signal=44%
GO_RIBONUCLEOPROTEIN_COMPLEX_BIOGENESIS	GO_RIBONUCLEOPROTEIN_COMPLEX_BIOGENESIS		395	0.380187	1.68616	0	0.0821587	1	2245	tags=30%, list=19%, signal=35%
GO_NUCLEOTIDE_EXCISION_REPAIR	GO_NUCLEOTIDE_EXCISION_REPAIR		105	0.440885	1.68612	0	0.0811916	1	2330	tags=38%, list=20%, signal=47%
GO_CHROMOSOME_LOCALIZATION	GO_CHROMOSOME_LOCALIZATION		50	0.501986	1.68603	0.00385356	0.0802819	1	2234	tags=40%, list=19%, signal=49%
GO_DAMAGED_DNA_BINDING	GO_DAMAGED_DNA_BINDING		55	0.487252	1.68428	0.00197239	0.0808265	1	2194	tags=40%, list=19%, signal=49%
GO_RRNA_MODIFICATION	GO_RRNA_MODIFICATION		23	0.605741	1.68369	0.00784314	0.0804471	1	1481	tags=35%, list=13%, signal=40%
GO_POSITIVE_REGULATION_OF_GENE_EXPRESSION_EPIGENETIC	GO_POSITIVE_REGULATION_OF_GENE_EXPRESSION_EPIGENETIC		70	0.473677	1.683	0	0.080034	1	1426	tags=29%, list=12%, signal=32%
GO_DNA_REPLICATION_INDEPENDENT_NUCLEOSOME_ORGANIZATION	GO_DNA_REPLICATION_INDEPENDENT_NUCLEOSOME_ORGANIZATION		44	0.51602	1.68032	0.0077821	0.0811015	1	1510	tags=32%, list=13%, signal=36%
GO_HISTONE_BINDING	GO_HISTONE_BINDING		147	0.425924	1.67673	0	0.0830774	1	2318	tags=32%, list=20%, signal=39%
GO_TRANSLESION_SYNTHESIS	GO_TRANSLESION_SYNTHESIS		33	0.558921	1.67538	0.00374532	0.083232	1	2299	tags=52%, list=20%, signal=64%
GO_ERROR_FREE_TRANSLESION_SYNTHESIS	GO_ERROR_FREE_TRANSLESION_SYNTHESIS		18	0.630988	1.67141	0.0197842	0.0858094	1	2299	tags=56%, list=20%, signal=69%
GO_DNA_DAMAGE_RESPONSE_DETECTION_OF_DNA_DAMAGE	GO_DNA_DAMAGE_RESPONSE_DETECTION_OF_DNA_DAMAGE		33	0.541448	1.66947	0.00373832	0.0864499	1	2299	tags=52%, list=20%, signal=64%
GO_CATALYTIC_STEP_2_SPLICEOSOME	GO_CATALYTIC_STEP_2_SPLICEOSOME		81	0.451847	1.66938	0.00372439	0.0855956	1	2511	tags=41%, list=22%, signal=52%
GO_CELL_CYCLE_CHECKPOINT	GO_CELL_CYCLE_CHECKPOINT		158	0.418095	1.66624	0	0.0875287	1	2234	tags=34%, list=19%, signal=42%
GO_FORMATION_OF_TRANSLATION_PREINITIATION_COMPLEX	GO_FORMATION_OF_TRANSLATION_PREINITIATION_COMPLEX		20	0.624654	1.66461	0.0059761	0.0878882	1	2797	tags=55%, list=24%, signal=72%
GO_HELICASE_ACTIVITY	GO_HELICASE_ACTIVITY		136	0.423702	1.66369	0.00191571	0.0878766	1	2131	tags=34%, list=18%, signal=41%
GO_DNA_RECOMBINATION	GO_DNA_RECOMBINATION		164	0.416054	1.66317	0	0.0873259	1	2306	tags=36%, list=20%, signal=44%
GO_SPINDLE_CHECKPOINT	GO_SPINDLE_CHECKPOINT		21	0.600817	1.66312	0.00892857	0.0865212	1	3329	tags=67%, list=29%, signal=93%
GO_PYRIMIDINE_NUCLEOSIDE_TRIPHOSPHATE_METABOLIC_PROCESS	GO_PYRIMIDINE_NUCLEOSIDE_TRIPHOSPHATE_METABOLIC_PROCESS		16	0.644581	1.66169	0.0229008	0.0869527	1	2647	tags=50%, list=23%, signal=65%
GO_EUKARYOTIC_TRANSLATION_INITIATION_FACTOR_3_COMPLEX	GO_EUKARYOTIC_TRANSLATION_INITIATION_FACTOR_3_COMPLEX		16	0.653551	1.66051	0.0056391	0.0869594	1	2823	tags=69%, list=24%, signal=91%
GO_POSTREPLICATION_REPAIR	GO_POSTREPLICATION_REPAIR		43	0.512246	1.65926	0.0135397	0.0870928	1	2299	tags=44%, list=20%, signal=55%
GO_TELOMERASE_HOLOENZYME_COMPLEX	GO_TELOMERASE_HOLOENZYME_COMPLEX		15	0.658888	1.65635	0.0210325	0.0888457	1	2414	tags=60%, list=21%, signal=76%
GO_MACROMOLECULAR_COMPLEX_DISASSEMBLY	GO_MACROMOLECULAR_COMPLEX_DISASSEMBLY		149	0.410566	1.64761	0.00181818	0.0957571	1	2296	tags=32%, list=20%, signal=39%
GO_SISTER_CHROMATID_COHESION	GO_SISTER_CHROMATID_COHESION		96	0.446855	1.64474	0.00183486	0.0974975	1	2515	tags=43%, list=22%, signal=54%
GO_AMINO_ACID_TRANSPORT	GO_AMINO_ACID_TRANSPORT		56	0.485467	1.63601	0.00550459	0.104975	1	1171	tags=27%, list=10%, signal=30%
GO_REGULATION_OF_CELL_DIVISION	GO_REGULATION_OF_CELL_DIVISION		179	0.399676	1.62953	0	0.110312	1	2253	tags=30%, list=19%, signal=37%
GO_MITOCHONDRIAL_RNA_METABOLIC_PROCESS	GO_MITOCHONDRIAL_RNA_METABOLIC_PROCESS		23	0.576983	1.62831	0.01341	0.110486	1	2544	tags=57%, list=22%, signal=72%
GO_DNA_HELICASE_ACTIVITY	GO_DNA_HELICASE_ACTIVITY		50	0.49532	1.62825	0.00742115	0.109527	1	2054	tags=44%, list=18%, signal=53%
GO_DNA_DIRECTED_RNA_POLYMERASE_II_CORE_COMPLEX	GO_DNA_DIRECTED_RNA_POLYMERASE_II_CORE_COMPLEX		15	0.648327	1.62807	0.00959693	0.108704	1	962	tags=47%, list=8%, signal=51%
GO_HISTONE_EXCHANGE	GO_HISTONE_EXCHANGE		39	0.511591	1.62707	0.00392927	0.108738	1	1510	tags=31%, list=13%, signal=35%
GO_U2_SNRNP	GO_U2_SNRNP		16	0.642046	1.62516	0.01341	0.109667	1	2297	tags=56%, list=20%, signal=70%
GO_REGULATION_OF_MEGAKARYOCYTE_DIFFERENTIATION	GO_REGULATION_OF_MEGAKARYOCYTE_DIFFERENTIATION		21	0.594067	1.62239	0.0168224	0.111515	1	718	tags=24%, list=6%, signal=25%
GO_ATP_DEPENDENT_CHROMATIN_REMODELING	GO_ATP_DEPENDENT_CHROMATIN_REMODELING		58	0.470792	1.62223	0.00189036	0.110673	1	1510	tags=28%, list=13%, signal=32%
GO_DNA_TEMPLATED_TRANSCRIPTION_ELONGATION	GO_DNA_TEMPLATED_TRANSCRIPTION_ELONGATION		87	0.440198	1.62059	0.00564972	0.111258	1	3084	tags=49%, list=27%, signal=67%
GO_NUCLEOTIDE_EXCISION_REPAIR_DNA_INCISION	GO_NUCLEOTIDE_EXCISION_REPAIR_DNA_INCISION		37	0.518413	1.62019	0.0190114	0.110744	1	2299	tags=46%, list=20%, signal=57%
GO_TRANSLATION_PREINITIATION_COMPLEX	GO_TRANSLATION_PREINITIATION_COMPLEX		16	0.630451	1.61176	0.0210728	0.118559	1	2797	tags=63%, list=24%, signal=82%
GO_NUCLEOTIDE_EXCISION_REPAIR_DNA_GAP_FILLING	GO_NUCLEOTIDE_EXCISION_REPAIR_DNA_GAP_FILLING		23	0.560732	1.61062	0.01002	0.11868	1	2306	tags=52%, list=20%, signal=65%
GO_LARGE_RIBOSOMAL_SUBUNIT	GO_LARGE_RIBOSOMAL_SUBUNIT		88	0.438554	1.60862	0.00383877	0.119771	1	2580	tags=39%, list=22%, signal=49%
GO_ERROR_PRONE_TRANSLESION_SYNTHESIS	GO_ERROR_PRONE_TRANSLESION_SYNTHESIS		17	0.624353	1.60696	0.0252708	0.120634	1	2893	tags=71%, list=25%, signal=94%
GO_REPLICATION_FORK	GO_REPLICATION_FORK		59	0.468849	1.60487	0.00719425	0.121822	1	2308	tags=36%, list=20%, signal=44%
GO_SPINDLE_POLE	GO_SPINDLE_POLE		97	0.434567	1.60373	0.00189394	0.122002	1	2653	tags=40%, list=23%, signal=52%
GO_AMINO_ACID_TRANSMEMBRANE_TRANSPORTER_ACTIVITY	GO_AMINO_ACID_TRANSMEMBRANE_TRANSPORTER_ACTIVITY		33	0.529462	1.60368	0.00542496	0.121046	1	784	tags=24%, list=7%, signal=26%
GO_REGULATION_OF_NUCLEAR_DIVISION	GO_REGULATION_OF_NUCLEAR_DIVISION		117	0.41503	1.60248	0	0.121292	1	2253	tags=34%, list=19%, signal=42%
GO_NEGATIVE_REGULATION_OF_MITOTIC_NUCLEAR_DIVISION	GO_NEGATIVE_REGULATION_OF_MITOTIC_NUCLEAR_DIVISION		29	0.539765	1.59731	0.0303605	0.126049	1	1983	tags=41%, list=17%, signal=50%
GO_DOUBLE_STRAND_BREAK_REPAIR	GO_DOUBLE_STRAND_BREAK_REPAIR		138	0.407576	1.59543	0.00184502	0.127216	1	2142	tags=31%, list=18%, signal=38%
GO_SMALL_NUCLEAR_RIBONUCLEOPROTEIN_COMPLEX	GO_SMALL_NUCLEAR_RIBONUCLEOPROTEIN_COMPLEX		53	0.475204	1.59382	0.00192678	0.128152	1	1906	tags=36%, list=16%, signal=43%
GO_NUCLEAR_UBIQUITIN_LIGASE_COMPLEX	GO_NUCLEAR_UBIQUITIN_LIGASE_COMPLEX		35	0.505387	1.58816	0.0242086	0.133377	1	2559	tags=46%, list=22%, signal=59%
GO_REGULATION_OF_GENE_EXPRESSION_EPIGENETIC	GO_REGULATION_OF_GENE_EXPRESSION_EPIGENETIC		175	0.392743	1.5859	0	0.135028	1	1487	tags=23%, list=13%, signal=26%
GO_MEIOTIC_CELL_CYCLE_PROCESS	GO_MEIOTIC_CELL_CYCLE_PROCESS		87	0.43327	1.5826	0.00554529	0.137745	1	3220	tags=48%, list=28%, signal=66%
GO_DNA_INTEGRITY_CHECKPOINT	GO_DNA_INTEGRITY_CHECKPOINT		122	0.403512	1.57866	0.00186567	0.14144	1	2054	tags=34%, list=18%, signal=40%
GO_TELOMERE_CAPPING	GO_TELOMERE_CAPPING		24	0.553139	1.57855	0.0270793	0.140511	1	1426	tags=33%, list=12%, signal=38%
GO_MEIOTIC_CELL_CYCLE	GO_MEIOTIC_CELL_CYCLE		111	0.419	1.57786	0	0.140249	1	2504	tags=37%, list=22%, signal=47%
GO_DICARBOXYLIC_ACID_TRANSPORT	GO_DICARBOXYLIC_ACID_TRANSPORT		31	0.529006	1.57766	0.0207939	0.139494	1	1423	tags=29%, list=12%, signal=33%
GO_REGULATION_OF_DNA_TEMPLATED_TRANSCRIPTION_ELONGATION	GO_REGULATION_OF_DNA_TEMPLATED_TRANSCRIPTION_ELONGATION		31	0.52663	1.57617	0.017341	0.140227	1	3582	tags=61%, list=31%, signal=89%
GO_POSITIVE_REGULATION_OF_TELOMERE_MAINTENANCE_VIA_TELOMERE_LENGTHENING	GO_POSITIVE_REGULATION_OF_TELOMERE_MAINTENANCE_VIA_TELOMERE_LENGTHENING		28	0.53914	1.57223	0.0207939	0.14374	1	1316	tags=39%, list=11%, signal=44%
GO_PROTEIN_HETEROOLIGOMERIZATION	GO_PROTEIN_HETEROOLIGOMERIZATION		75	0.433959	1.56837	0.00550459	0.147443	1	1466	tags=25%, list=13%, signal=29%
GO_NUCLEAR_ENVELOPE_REASSEMBLY	GO_NUCLEAR_ENVELOPE_REASSEMBLY		17	0.597185	1.56404	0.0406977	0.151648	1	3067	tags=71%, list=26%, signal=96%
GO_CYTOPLASMIC_TRANSLATION	GO_CYTOPLASMIC_TRANSLATION		40	0.491559	1.56335	0.0138614	0.151301	1	3027	tags=50%, list=26%, signal=67%
GO_NEUROBLAST_PROLIFERATION	GO_NEUROBLAST_PROLIFERATION		15	0.601469	1.56268	0.0564202	0.151092	1	880	tags=20%, list=8%, signal=22%
GO_DNA_DEPENDENT_ATPASE_ACTIVITY	GO_DNA_DEPENDENT_ATPASE_ACTIVITY		74	0.435593	1.56068	0.0133843	0.152805	1	2054	tags=35%, list=18%, signal=42%
GO_CENTROMERE_COMPLEX_ASSEMBLY	GO_CENTROMERE_COMPLEX_ASSEMBLY		39	0.497648	1.55875	0.01222	0.154042	1	1591	tags=31%, list=14%, signal=36%
GO_CELL_SURFACE_RECEPTOR_SIGNALING_PATHWAY_INVOLVED_IN_CELL_CELL_SIGNALING	GO_CELL_SURFACE_RECEPTOR_SIGNALING_PATHWAY_INVOLVED_IN_CELL_CELL_SIGNALING		25	0.542622	1.55869	0.022	0.153014	1	2659	tags=48%, list=23%, signal=62%
GO_ENDONUCLEASE_ACTIVITY_ACTIVE_WITH_EITHER_RIBO_OR_DEOXYRIBONUCLEIC_ACIDS_AND_PRODUCING_5_PHOSPHOMONOESTERS	GO_ENDONUCLEASE_ACTIVITY_ACTIVE_WITH_EITHER_RIBO_OR_DEOXYRIBONUCLEIC_ACIDS_AND_PRODUCING_5_PHOSPHOMONOESTERS		33	0.50614	1.55724	0.0194175	0.153726	1	969	tags=30%, list=8%, signal=33%
GO_PROTEIN_K11_LINKED_UBIQUITINATION	GO_PROTEIN_K11_LINKED_UBIQUITINATION		22	0.561612	1.55721	0.018797	0.152666	1	2559	tags=45%, list=22%, signal=58%
GO_NEGATIVE_REGULATION_OF_RNA_SPLICING	GO_NEGATIVE_REGULATION_OF_RNA_SPLICING		21	0.564594	1.55714	0.027668	0.15172	1	2119	tags=43%, list=18%, signal=52%
GO_TRNA_TRANSPORT	GO_TRNA_TRANSPORT		30	0.524513	1.55462	0.0235294	0.153945	1	2962	tags=43%, list=26%, signal=58%
GO_RECOMBINATIONAL_REPAIR	GO_RECOMBINATIONAL_REPAIR		64	0.446415	1.55415	0.0114723	0.153592	1	2117	tags=34%, list=18%, signal=42%
GO_ORGANIC_ACID_TRANSMEMBRANE_TRANSPORT	GO_ORGANIC_ACID_TRANSMEMBRANE_TRANSPORT		48	0.464997	1.554	0.0135135	0.152761	1	661	tags=17%, list=6%, signal=18%
GO_SULFUR_COMPOUND_TRANSPORT	GO_SULFUR_COMPOUND_TRANSPORT		15	0.603983	1.55307	0.0391753	0.152787	1	2269	tags=47%, list=20%, signal=58%
GO_KERATINOCYTE_DIFFERENTIATION	GO_KERATINOCYTE_DIFFERENTIATION		33	0.513987	1.55192	0.0261194	0.153247	1	2079	tags=30%, list=18%, signal=37%
GO_REGULATION_OF_MUSCLE_TISSUE_DEVELOPMENT	GO_REGULATION_OF_MUSCLE_TISSUE_DEVELOPMENT		49	0.471493	1.55183	0.0140562	0.152316	1	918	tags=16%, list=8%, signal=18%
GO_TERMINATION_OF_RNA_POLYMERASE_II_TRANSCRIPTION	GO_TERMINATION_OF_RNA_POLYMERASE_II_TRANSCRIPTION		56	0.457421	1.55169	0.0150659	0.151505	1	2156	tags=36%, list=19%, signal=44%
GO_MITOCHONDRIAL_TRANSLATION	GO_MITOCHONDRIAL_TRANSLATION		102	0.410293	1.55165	0.00566038	0.150565	1	2593	tags=36%, list=22%, signal=46%
GO_CHROMOSOME_CONDENSATION	GO_CHROMOSOME_CONDENSATION		20	0.567394	1.55113	0.0318725	0.150214	1	1284	tags=40%, list=11%, signal=45%
GO_U2_TYPE_SPLICEOSOMAL_COMPLEX	GO_U2_TYPE_SPLICEOSOMAL_COMPLEX		26	0.537592	1.54875	0.0124224	0.152292	1	1860	tags=42%, list=16%, signal=50%
GO_RNA_3_END_PROCESSING	GO_RNA_3_END_PROCESSING		86	0.424989	1.54765	0.0075188	0.152586	1	2156	tags=33%, list=19%, signal=40%
GO_NCRNA_PROCESSING	GO_NCRNA_PROCESSING		346	0.353623	1.54663	0	0.152872	1	2354	tags=27%, list=20%, signal=33%
GO_PROTEIN_HETERODIMERIZATION_ACTIVITY	GO_PROTEIN_HETERODIMERIZATION_ACTIVITY		290	0.359469	1.54583	0	0.153012	1	1583	tags=22%, list=14%, signal=25%
GO_GLUTAMINE_METABOLIC_PROCESS	GO_GLUTAMINE_METABOLIC_PROCESS		19	0.57082	1.5452	0.0372549	0.152777	1	1534	tags=37%, list=13%, signal=42%
GO_L_AMINO_ACID_TRANSMEMBRANE_TRANSPORTER_ACTIVITY	GO_L_AMINO_ACID_TRANSMEMBRANE_TRANSPORTER_ACTIVITY		23	0.547299	1.54472	0.0190114	0.152371	1	661	tags=26%, list=6%, signal=28%
GO_NEGATIVE_REGULATION_OF_MACROAUTOPHAGY	GO_NEGATIVE_REGULATION_OF_MACROAUTOPHAGY		19	0.572632	1.53872	0.0259259	0.159094	1	1159	tags=37%, list=10%, signal=41%
GO_ORGAN_OR_TISSUE_SPECIFIC_IMMUNE_RESPONSE	GO_ORGAN_OR_TISSUE_SPECIFIC_IMMUNE_RESPONSE		15	0.605134	1.53677	0.0311284	0.160499	1	491	tags=27%, list=4%, signal=28%
GO_TRANSLATIONAL_TERMINATION	GO_TRANSLATIONAL_TERMINATION		89	0.419716	1.53427	0.0180361	0.16259	1	2580	tags=37%, list=22%, signal=47%
GO_CAJAL_BODY	GO_CAJAL_BODY		44	0.468983	1.53233	0.0140562	0.164226	1	2446	tags=36%, list=21%, signal=46%
GO_TELOMERIC_DNA_BINDING	GO_TELOMERIC_DNA_BINDING		27	0.538716	1.53064	0.0262172	0.165339	1	1261	tags=30%, list=11%, signal=33%
GO_CONDENSED_NUCLEAR_CHROMOSOME	GO_CONDENSED_NUCLEAR_CHROMOSOME		58	0.440681	1.52987	0.0213592	0.165382	1	2234	tags=43%, list=19%, signal=53%
GO_TRNA_PROCESSING	GO_TRNA_PROCESSING		100	0.407871	1.52829	0.0112782	0.166544	1	2961	tags=40%, list=26%, signal=53%
GO_NEGATIVE_REGULATION_OF_CHROMOSOME_ORGANIZATION	GO_NEGATIVE_REGULATION_OF_CHROMOSOME_ORGANIZATION		82	0.421063	1.52323	0.0190476	0.172152	1	2535	tags=41%, list=22%, signal=53%
GO_REGULATION_OF_TRANSCRIPTION_ELONGATION_FROM_RNA_POLYMERASE_II_PROMOTER	GO_REGULATION_OF_TRANSCRIPTION_ELONGATION_FROM_RNA_POLYMERASE_II_PROMOTER		19	0.561147	1.52311	0.0439771	0.171263	1	3489	tags=53%, list=30%, signal=75%
GO_TRANSLATION_INITIATION_FACTOR_ACTIVITY	GO_TRANSLATION_INITIATION_FACTOR_ACTIVITY		48	0.458868	1.52284	0.0141988	0.170608	1	3021	tags=42%, list=26%, signal=56%
GO_NUCLEAR_PORE	GO_NUCLEAR_PORE		67	0.437339	1.52247	0.0144665	0.17012	1	3127	tags=45%, list=27%, signal=61%
GO_TRNA_SPECIFIC_RIBONUCLEASE_ACTIVITY	GO_TRNA_SPECIFIC_RIBONUCLEASE_ACTIVITY		15	0.607522	1.52095	0.0453686	0.171335	1	969	tags=40%, list=8%, signal=44%
GO_DNA_TEMPLATED_TRANSCRIPTION_TERMINATION	GO_DNA_TEMPLATED_TRANSCRIPTION_TERMINATION		93	0.415685	1.51714	0	0.175583	1	2264	tags=34%, list=20%, signal=42%
GO_SMN_SM_PROTEIN_COMPLEX	GO_SMN_SM_PROTEIN_COMPLEX		15	0.597197	1.51559	0.0559846	0.176791	1	1794	tags=33%, list=15%, signal=39%
GO_MEMBRANE_DISASSEMBLY	GO_MEMBRANE_DISASSEMBLY		42	0.480822	1.51484	0.0300353	0.176859	1	2298	tags=40%, list=20%, signal=50%
GO_EPITHELIAL_TO_MESENCHYMAL_TRANSITION	GO_EPITHELIAL_TO_MESENCHYMAL_TRANSITION		25	0.525228	1.5135	0.0291829	0.177511	1	1912	tags=32%, list=17%, signal=38%
GO_QUATERNARY_AMMONIUM_GROUP_BINDING	GO_QUATERNARY_AMMONIUM_GROUP_BINDING		18	0.573934	1.51218	0.0294118	0.178339	1	1562	tags=39%, list=13%, signal=45%
GO_BAF_TYPE_COMPLEX	GO_BAF_TYPE_COMPLEX		17	0.581429	1.51188	0.0391389	0.177737	1	1976	tags=35%, list=17%, signal=42%
GO_SPINDLE	GO_SPINDLE		232	0.361889	1.51098	0	0.177992	1	2574	tags=33%, list=22%, signal=42%
GO_TRANSCRIPTION_ELONGATION_FROM_RNA_POLYMERASE_II_PROMOTER	GO_TRANSCRIPTION_ELONGATION_FROM_RNA_POLYMERASE_II_PROMOTER		72	0.428847	1.50856	0.0130841	0.180311	1	1614	tags=28%, list=14%, signal=32%
GO_RNA_DEPENDENT_DNA_BIOSYNTHETIC_PROCESS	GO_RNA_DEPENDENT_DNA_BIOSYNTHETIC_PROCESS		19	0.559959	1.50661	0.0485437	0.182233	1	1261	tags=37%, list=11%, signal=41%
GO_EXON_EXON_JUNCTION_COMPLEX	GO_EXON_EXON_JUNCTION_COMPLEX		18	0.56678	1.50558	0.0533597	0.182574	1	2724	tags=50%, list=24%, signal=65%
GO_NEGATIVE_REGULATION_OF_ORGANELLE_ORGANIZATION	GO_NEGATIVE_REGULATION_OF_ORGANELLE_ORGANIZATION		294	0.348999	1.50461	0	0.182946	1	2256	tags=32%, list=19%, signal=38%
GO_ANION_CHANNEL_ACTIVITY	GO_ANION_CHANNEL_ACTIVITY		26	0.527797	1.50421	0.039604	0.182533	1	2395	tags=42%, list=21%, signal=53%
GO_ANAPHASE_PROMOTING_COMPLEX_DEPENDENT_CATABOLIC_PROCESS	GO_ANAPHASE_PROMOTING_COMPLEX_DEPENDENT_CATABOLIC_PROCESS		70	0.428698	1.5039	0.00580271	0.181989	1	2335	tags=37%, list=20%, signal=46%
GO_XENOPHAGY	GO_XENOPHAGY		72	0.429074	1.50289	0.0182149	0.182432	1	2298	tags=29%, list=20%, signal=36%
GO_INTERMEDIATE_FILAMENT	GO_INTERMEDIATE_FILAMENT		32	0.490045	1.50257	0.0335196	0.181887	1	1711	tags=31%, list=15%, signal=37%
GO_RRNA_METABOLIC_PROCESS	GO_RRNA_METABOLIC_PROCESS		233	0.358333	1.50196	0.00182482	0.181736	1	2245	tags=26%, list=19%, signal=31%
GO_POSITIVE_REGULATION_OF_DNA_BIOSYNTHETIC_PROCESS	GO_POSITIVE_REGULATION_OF_DNA_BIOSYNTHETIC_PROCESS		45	0.461656	1.49971	0.0254083	0.184063	1	1316	tags=36%, list=11%, signal=40%
GO_SPLICEOSOMAL_TRI_SNRNP_COMPLEX	GO_SPLICEOSOMAL_TRI_SNRNP_COMPLEX		23	0.527874	1.49953	0.0448598	0.183319	1	1482	tags=39%, list=13%, signal=45%
GO_CHLORIDE_TRANSPORT	GO_CHLORIDE_TRANSPORT		29	0.499986	1.49941	0.0260708	0.182534	1	2269	tags=38%, list=20%, signal=47%
GO_AMMONIUM_ION_BINDING	GO_AMMONIUM_ION_BINDING		23	0.535495	1.49897	0.0417495	0.182161	1	1562	tags=30%, list=13%, signal=35%
GO_REGULATION_OF_TELOMERE_MAINTENANCE_VIA_TELOMERE_LENGTHENING	GO_REGULATION_OF_TELOMERE_MAINTENANCE_VIA_TELOMERE_LENGTHENING		44	0.457654	1.49825	0.0255403	0.182216	1	2686	tags=45%, list=23%, signal=59%
GO_PROTEIN_HOMOTETRAMERIZATION	GO_PROTEIN_HOMOTETRAMERIZATION		41	0.47568	1.49805	0.0311927	0.181538	1	2318	tags=44%, list=20%, signal=55%
GO_RIBOSOME_BIOGENESIS	GO_RIBOSOME_BIOGENESIS		282	0.350833	1.49703	0	0.182067	1	2245	tags=27%, list=19%, signal=33%
GO_REGULATION_OF_CELL_CYCLE_PROCESS	GO_REGULATION_OF_CELL_CYCLE_PROCESS		418	0.338151	1.49692	0	0.181323	1	2532	tags=32%, list=22%, signal=40%
GO_MRNA_3_END_PROCESSING	GO_MRNA_3_END_PROCESSING		64	0.42737	1.49681	0.0208729	0.180539	1	2156	tags=33%, list=19%, signal=40%
GO_REGULATION_OF_MRNA_SPLICING_VIA_SPLICEOSOME	GO_REGULATION_OF_MRNA_SPLICING_VIA_SPLICEOSOME		48	0.452807	1.49607	0.0203252	0.180659	1	3064	tags=50%, list=26%, signal=68%
GO_NEUTRAL_AMINO_ACID_TRANSPORT	GO_NEUTRAL_AMINO_ACID_TRANSPORT		17	0.575382	1.49306	0.0583501	0.184009	1	784	tags=29%, list=7%, signal=32%
GO_PTERIDINE_CONTAINING_COMPOUND_METABOLIC_PROCESS	GO_PTERIDINE_CONTAINING_COMPOUND_METABOLIC_PROCESS		24	0.523934	1.49189	0.0451977	0.184723	1	4181	tags=67%, list=36%, signal=104%
GO_ANION_CATION_SYMPORTER_ACTIVITY	GO_ANION_CATION_SYMPORTER_ACTIVITY		17	0.57544	1.49087	0.0550459	0.185275	1	815	tags=29%, list=7%, signal=32%
GO_TRANSLATIONAL_ELONGATION	GO_TRANSLATIONAL_ELONGATION		102	0.396108	1.48783	0.00558659	0.188449	1	2644	tags=37%, list=23%, signal=48%
GO_NCRNA_METABOLIC_PROCESS	GO_NCRNA_METABOLIC_PROCESS		467	0.335287	1.4856	0	0.190831	1	2354	tags=27%, list=20%, signal=32%
GO_NEGATIVE_REGULATION_OF_PROTEIN_COMPLEX_DISASSEMBLY	GO_NEGATIVE_REGULATION_OF_PROTEIN_COMPLEX_DISASSEMBLY		122	0.378629	1.4837	0.0088968	0.192704	1	2536	tags=35%, list=22%, signal=45%
GO_ORGANELLAR_LARGE_RIBOSOMAL_SUBUNIT	GO_ORGANELLAR_LARGE_RIBOSOMAL_SUBUNIT		30	0.494416	1.48297	0.042471	0.192809	1	4226	tags=70%, list=36%, signal=110%
GO_NEGATIVE_REGULATION_OF_HEMATOPOIETIC_PROGENITOR_CELL_DIFFERENTIATION	GO_NEGATIVE_REGULATION_OF_HEMATOPOIETIC_PROGENITOR_CELL_DIFFERENTIATION		19	0.552802	1.48041	0.034	0.195513	1	64	tags=16%, list=1%, signal=16%
GO_G2_DNA_DAMAGE_CHECKPOINT	GO_G2_DNA_DAMAGE_CHECKPOINT		29	0.496762	1.47796	0.0407767	0.198023	1	3108	tags=62%, list=27%, signal=85%
GO_POSITIVE_REGULATION_OF_DNA_TEMPLATED_TRANSCRIPTION_ELONGATION	GO_POSITIVE_REGULATION_OF_DNA_TEMPLATED_TRANSCRIPTION_ELONGATION		21	0.524252	1.47787	0.0458167	0.197177	1	3582	tags=62%, list=31%, signal=89%
GO_HISTONE_H4_ACETYLATION	GO_HISTONE_H4_ACETYLATION		36	0.470392	1.4746	0.0349908	0.200706	1	2935	tags=42%, list=25%, signal=56%
GO_INTERCELLULAR_BRIDGE	GO_INTERCELLULAR_BRIDGE		35	0.487156	1.47409	0.0342205	0.200416	1	2450	tags=37%, list=21%, signal=47%
GO_REGULATION_OF_PROTEIN_COMPLEX_DISASSEMBLY	GO_REGULATION_OF_PROTEIN_COMPLEX_DISASSEMBLY		159	0.366775	1.47347	0.0093985	0.200438	1	2536	tags=33%, list=22%, signal=41%
GO_NEGATIVE_REGULATION_OF_ORGANELLE_ASSEMBLY	GO_NEGATIVE_REGULATION_OF_ORGANELLE_ASSEMBLY		19	0.541041	1.46998	0.0669216	0.20448	1	2256	tags=47%, list=19%, signal=59%
GO_RESPONSE_TO_INCREASED_OXYGEN_LEVELS	GO_RESPONSE_TO_INCREASED_OXYGEN_LEVELS		16	0.57399	1.46971	0.0667939	0.203928	1	1970	tags=31%, list=17%, signal=38%
GO_CYTOSOLIC_LARGE_RIBOSOMAL_SUBUNIT	GO_CYTOSOLIC_LARGE_RIBOSOMAL_SUBUNIT		56	0.438294	1.46912	0.0255941	0.203763	1	2243	tags=36%, list=19%, signal=44%
GO_REGULATION_OF_ALTERNATIVE_MRNA_SPLICING_VIA_SPLICEOSOME	GO_REGULATION_OF_ALTERNATIVE_MRNA_SPLICING_VIA_SPLICEOSOME		23	0.525343	1.46831	0.0342742	0.203983	1	2126	tags=43%, list=18%, signal=53%
GO_HEART_TRABECULA_MORPHOGENESIS	GO_HEART_TRABECULA_MORPHOGENESIS		15	0.580506	1.46605	0.0477064	0.206314	1	756	tags=20%, list=7%, signal=21%
GO_STRUCTURAL_CONSTITUENT_OF_RIBOSOME	GO_STRUCTURAL_CONSTITUENT_OF_RIBOSOME		186	0.358819	1.46476	0.00186916	0.207263	1	2353	tags=29%, list=20%, signal=36%
GO_ENDORIBONUCLEASE_ACTIVITY	GO_ENDORIBONUCLEASE_ACTIVITY		39	0.467314	1.46323	0.0400763	0.208623	1	969	tags=28%, list=8%, signal=31%
GO_MITOTIC_SPINDLE_ORGANIZATION	GO_MITOTIC_SPINDLE_ORGANIZATION		54	0.436611	1.46261	0.0222222	0.208606	1	2256	tags=35%, list=19%, signal=43%
GO_RNA_POLYMERASE_COMPLEX	GO_RNA_POLYMERASE_COMPLEX		112	0.376657	1.46212	0.0108696	0.208371	1	3495	tags=47%, list=30%, signal=67%
GO_PROTEASOME_ACCESSORY_COMPLEX	GO_PROTEASOME_ACCESSORY_COMPLEX		24	0.51649	1.45926	0.0623819	0.211834	1	2335	tags=42%, list=20%, signal=52%
GO_CYTOKINESIS	GO_CYTOKINESIS		67	0.418384	1.45915	0.0276753	0.211026	1	1984	tags=28%, list=17%, signal=34%
GO_CELLULAR_PROTEIN_COMPLEX_DISASSEMBLY	GO_CELLULAR_PROTEIN_COMPLEX_DISASSEMBLY		106	0.387395	1.45768	0.0132325	0.212261	1	2580	tags=34%, list=22%, signal=43%
GO_STRUCTURAL_MOLECULE_ACTIVITY	GO_STRUCTURAL_MOLECULE_ACTIVITY		408	0.328234	1.45647	0	0.213237	1	2580	tags=29%, list=22%, signal=36%
GO_CELL_CELL_ADHESION_VIA_PLASMA_MEMBRANE_ADHESION_MOLECULES	GO_CELL_CELL_ADHESION_VIA_PLASMA_MEMBRANE_ADHESION_MOLECULES		48	0.441399	1.45377	0.0386847	0.2165	1	1623	tags=27%, list=14%, signal=31%
GO_RIBOSOMAL_SUBUNIT	GO_RIBOSOMAL_SUBUNIT		153	0.365035	1.45353	0.00779727	0.215879	1	2243	tags=28%, list=19%, signal=34%
GO_PTERIDINE_CONTAINING_COMPOUND_BIOSYNTHETIC_PROCESS	GO_PTERIDINE_CONTAINING_COMPOUND_BIOSYNTHETIC_PROCESS		15	0.566657	1.45321	0.073724	0.215406	1	4071	tags=73%, list=35%, signal=113%
GO_NEUROEPITHELIAL_CELL_DIFFERENTIATION	GO_NEUROEPITHELIAL_CELL_DIFFERENTIATION		34	0.473118	1.45259	0.0471698	0.215481	1	1805	tags=29%, list=16%, signal=35%
GO_BETA_CATENIN_TCF_COMPLEX_ASSEMBLY	GO_BETA_CATENIN_TCF_COMPLEX_ASSEMBLY		32	0.470952	1.4523	0.0568627	0.214923	1	1074	tags=25%, list=9%, signal=27%
GO_PROTEIN_SUMOYLATION	GO_PROTEIN_SUMOYLATION		103	0.38518	1.45099	0.0183486	0.216	1	2354	tags=32%, list=20%, signal=40%
GO_DEOXYRIBONUCLEOTIDE_METABOLIC_PROCESS	GO_DEOXYRIBONUCLEOTIDE_METABOLIC_PROCESS		29	0.48732	1.45011	0.0511811	0.216362	1	2365	tags=38%, list=20%, signal=48%
GO_NUCLEUS_ORGANIZATION	GO_NUCLEUS_ORGANIZATION		108	0.3846	1.44734	0.0208729	0.219797	1	3076	tags=41%, list=27%, signal=55%
GO_ORGANELLAR_RIBOSOME	GO_ORGANELLAR_RIBOSOME		66	0.412468	1.44732	0.0314961	0.218874	1	2239	tags=35%, list=19%, signal=43%
GO_NEGATIVE_REGULATION_OF_CHROMOSOME_SEGREGATION	GO_NEGATIVE_REGULATION_OF_CHROMOSOME_SEGREGATION		24	0.499186	1.447	0.0589354	0.218461	1	3329	tags=58%, list=29%, signal=82%
GO_TUBULIN_BINDING	GO_TUBULIN_BINDING		178	0.357483	1.44545	0.0116959	0.21984	1	1892	tags=26%, list=16%, signal=30%
GO_MRNA_BINDING	GO_MRNA_BINDING		119	0.375389	1.44371	0.0226415	0.221729	1	2243	tags=30%, list=19%, signal=37%
GO_NUCLEAR_ENVELOPE_ORGANIZATION	GO_NUCLEAR_ENVELOPE_ORGANIZATION		71	0.410055	1.44187	0.0231214	0.223739	1	3067	tags=45%, list=26%, signal=61%
GO_MEIOSIS_I	GO_MEIOSIS_I		48	0.437477	1.43973	0.0527307	0.22627	1	2846	tags=52%, list=25%, signal=69%
GO_MISMATCH_REPAIR	GO_MISMATCH_REPAIR		27	0.501973	1.43824	0.0491803	0.227658	1	1736	tags=37%, list=15%, signal=43%
GO_CARBON_CARBON_LYASE_ACTIVITY	GO_CARBON_CARBON_LYASE_ACTIVITY		38	0.453569	1.43661	0.0429688	0.229456	1	2319	tags=32%, list=20%, signal=39%
GO_POSITIVE_REGULATION_OF_LIGASE_ACTIVITY	GO_POSITIVE_REGULATION_OF_LIGASE_ACTIVITY		97	0.380769	1.43497	0.0126582	0.231099	1	3092	tags=41%, list=27%, signal=56%
GO_REGULATION_OF_DOUBLE_STRAND_BREAK_REPAIR	GO_REGULATION_OF_DOUBLE_STRAND_BREAK_REPAIR		29	0.483989	1.43271	0.0609037	0.233803	1	3040	tags=45%, list=26%, signal=61%
GO_NEGATIVE_REGULATION_OF_CELL_CYCLE_PROCESS	GO_NEGATIVE_REGULATION_OF_CELL_CYCLE_PROCESS		173	0.349781	1.43262	0.00764818	0.232984	1	2055	tags=29%, list=18%, signal=35%
GO_PYRIMIDINE_NUCLEOTIDE_BIOSYNTHETIC_PROCESS	GO_PYRIMIDINE_NUCLEOTIDE_BIOSYNTHETIC_PROCESS		23	0.511506	1.43231	0.0636704	0.232506	1	2647	tags=43%, list=23%, signal=56%
GO_ORGANIC_ACID_TRANSMEMBRANE_TRANSPORTER_ACTIVITY	GO_ORGANIC_ACID_TRANSMEMBRANE_TRANSPORTER_ACTIVITY		57	0.413916	1.43213	0.0361905	0.23183	1	1449	tags=21%, list=13%, signal=24%
GO_RNA_LOCALIZATION	GO_RNA_LOCALIZATION		157	0.35396	1.43176	0.0184843	0.231492	1	1757	tags=22%, list=15%, signal=26%
GO_MITOTIC_CELL_CYCLE_CHECKPOINT	GO_MITOTIC_CELL_CYCLE_CHECKPOINT		114	0.376772	1.42806	0.0232108	0.236478	1	2234	tags=32%, list=19%, signal=40%
GO_REGULATION_OF_DNA_DEPENDENT_DNA_REPLICATION	GO_REGULATION_OF_DNA_DEPENDENT_DNA_REPLICATION		34	0.471441	1.42397	0.0419162	0.2424	1	1597	tags=35%, list=14%, signal=41%
GO_TRANSFERASE_ACTIVITY_TRANSFERRING_ONE_CARBON_GROUPS	GO_TRANSFERASE_ACTIVITY_TRANSFERRING_ONE_CARBON_GROUPS		154	0.358913	1.4239	0.0168539	0.241552	1	1970	tags=27%, list=17%, signal=32%
GO_EPIDERMAL_CELL_DIFFERENTIATION	GO_EPIDERMAL_CELL_DIFFERENTIATION		53	0.424299	1.42095	0.0320755	0.245608	1	1752	tags=25%, list=15%, signal=29%
GO_REGULATION_OF_MICROTUBULE_POLYMERIZATION_OR_DEPOLYMERIZATION	GO_REGULATION_OF_MICROTUBULE_POLYMERIZATION_OR_DEPOLYMERIZATION		137	0.362322	1.42056	0.010453	0.245316	1	2536	tags=35%, list=22%, signal=44%
GO_DNA_TEMPLATED_TRANSCRIPTION_INITIATION	GO_DNA_TEMPLATED_TRANSCRIPTION_INITIATION		155	0.35567	1.41959	0.0133333	0.245797	1	2986	tags=40%, list=26%, signal=53%
GO_RIBONUCLEOPROTEIN_COMPLEX_LOCALIZATION	GO_RIBONUCLEOPROTEIN_COMPLEX_LOCALIZATION		106	0.376147	1.41792	0.019802	0.247501	1	2962	tags=38%, list=26%, signal=50%
GO_ANTIMICROBIAL_HUMORAL_RESPONSE	GO_ANTIMICROBIAL_HUMORAL_RESPONSE		18	0.537128	1.41684	0.0796813	0.248257	1	491	tags=22%, list=4%, signal=23%
GO_RNA_METHYLATION	GO_RNA_METHYLATION		44	0.433624	1.41521	0.0469925	0.250043	1	3045	tags=36%, list=26%, signal=49%
GO_RIBOSOME	GO_RIBOSOME		202	0.342742	1.41516	0.00728597	0.249154	1	2296	tags=29%, list=20%, signal=36%
GO_NADP_BINDING	GO_NADP_BINDING		29	0.474701	1.41468	0.0695825	0.248911	1	2319	tags=34%, list=20%, signal=43%
GO_STRAND_DISPLACEMENT	GO_STRAND_DISPLACEMENT		24	0.508889	1.41451	0.0634921	0.248202	1	3220	tags=58%, list=28%, signal=81%
GO_MIDBODY	GO_MIDBODY		113	0.372635	1.41406	0.0150376	0.248045	1	1776	tags=26%, list=15%, signal=30%
GO_CELLULAR_AMINO_ACID_BIOSYNTHETIC_PROCESS	GO_CELLULAR_AMINO_ACID_BIOSYNTHETIC_PROCESS		64	0.408322	1.41314	0.03861	0.248609	1	1895	tags=28%, list=16%, signal=33%
GO_NEGATIVE_REGULATION_OF_MITOTIC_CELL_CYCLE	GO_NEGATIVE_REGULATION_OF_MITOTIC_CELL_CYCLE		160	0.35213	1.40926	0.0147874	0.254251	1	2054	tags=28%, list=18%, signal=34%
GO_SPINDLE_ASSEMBLY	GO_SPINDLE_ASSEMBLY		57	0.419989	1.40896	0.032491	0.253812	1	905	tags=23%, list=8%, signal=25%
GO_POSITIVE_REGULATION_OF_DNA_METABOLIC_PROCESS	GO_POSITIVE_REGULATION_OF_DNA_METABOLIC_PROCESS		132	0.361863	1.40781	0.0279851	0.254804	1	1837	tags=30%, list=16%, signal=35%
GO_G_PROTEIN_COUPLED_RECEPTOR_ACTIVITY	GO_G_PROTEIN_COUPLED_RECEPTOR_ACTIVITY		114	0.367475	1.40751	0.0172414	0.254307	1	2476	tags=26%, list=21%, signal=33%
GO_REGULATION_OF_CARDIAC_MUSCLE_TISSUE_DEVELOPMENT	GO_REGULATION_OF_CARDIAC_MUSCLE_TISSUE_DEVELOPMENT		21	0.508766	1.40527	0.0972763	0.256958	1	918	tags=19%, list=8%, signal=21%
GO_TRANSLATIONAL_INITIATION	GO_TRANSLATIONAL_INITIATION		140	0.357475	1.40518	0.012987	0.256134	1	3027	tags=36%, list=26%, signal=48%
GO_SPLICEOSOMAL_COMPLEX_ASSEMBLY	GO_SPLICEOSOMAL_COMPLEX_ASSEMBLY		48	0.424268	1.40433	0.0473485	0.256574	1	2031	tags=31%, list=18%, signal=38%
GO_MICROTUBULE_CYTOSKELETON_ORGANIZATION	GO_MICROTUBULE_CYTOSKELETON_ORGANIZATION		230	0.337028	1.40421	0.00184162	0.255861	1	1583	tags=22%, list=14%, signal=25%
GO_REGULATION_OF_DEFENSE_RESPONSE_TO_VIRUS_BY_HOST	GO_REGULATION_OF_DEFENSE_RESPONSE_TO_VIRUS_BY_HOST		95	0.380947	1.40396	0.0281426	0.255288	1	2342	tags=28%, list=20%, signal=35%
GO_CELLULAR_COMPONENT_DISASSEMBLY	GO_CELLULAR_COMPONENT_DISASSEMBLY		357	0.321077	1.40348	0.00184162	0.255168	1	2354	tags=27%, list=20%, signal=32%
GO_PROTEIN_OLIGOMERIZATION	GO_PROTEIN_OLIGOMERIZATION		286	0.329236	1.40314	0.0108499	0.25485	1	2342	tags=29%, list=20%, signal=35%
GO_EXONUCLEASE_ACTIVITY	GO_EXONUCLEASE_ACTIVITY		63	0.407873	1.40314	0.0552381	0.253909	1	2359	tags=29%, list=20%, signal=36%
GO_SUPRAMOLECULAR_FIBER	GO_SUPRAMOLECULAR_FIBER		341	0.318526	1.40179	0	0.255405	1	1846	tags=22%, list=16%, signal=26%
GO_REGULATION_OF_SIGNAL_TRANSDUCTION_BY_P53_CLASS_MEDIATOR	GO_REGULATION_OF_SIGNAL_TRANSDUCTION_BY_P53_CLASS_MEDIATOR		136	0.356711	1.39884	0.0313112	0.259567	1	2354	tags=32%, list=20%, signal=40%
GO_NEGATIVE_REGULATION_OF_TELOMERE_MAINTENANCE	GO_NEGATIVE_REGULATION_OF_TELOMERE_MAINTENANCE		24	0.487512	1.39884	0.0826772	0.258633	1	2686	tags=46%, list=23%, signal=60%
GO_MICROTUBULE_BINDING	GO_MICROTUBULE_BINDING		128	0.360103	1.3979	0.0282486	0.25932	1	1892	tags=25%, list=16%, signal=30%
GO_CELL_CYCLE_G1_S_PHASE_TRANSITION	GO_CELL_CYCLE_G1_S_PHASE_TRANSITION		91	0.381321	1.39584	0.0351562	0.262063	1	2561	tags=32%, list=22%, signal=41%
GO_GLYCOSYL_COMPOUND_BIOSYNTHETIC_PROCESS	GO_GLYCOSYL_COMPOUND_BIOSYNTHETIC_PROCESS		92	0.374552	1.39411	0.0224299	0.264191	1	2436	tags=37%, list=21%, signal=46%
GO_COENZYME_A_METABOLIC_PROCESS	GO_COENZYME_A_METABOLIC_PROCESS		15	0.544084	1.39275	0.0828516	0.265594	1	1020	tags=20%, list=9%, signal=22%
GO_REGULATION_OF_CHROMOSOME_ORGANIZATION	GO_REGULATION_OF_CHROMOSOME_ORGANIZATION		222	0.335888	1.39198	0.00357143	0.265953	1	2234	tags=32%, list=19%, signal=39%
GO_POSITIVE_REGULATION_OF_TELOMERE_MAINTENANCE	GO_POSITIVE_REGULATION_OF_TELOMERE_MAINTENANCE		41	0.439461	1.39159	0.0722656	0.265697	1	1316	tags=29%, list=11%, signal=33%
GO_TRANSCRIPTION_FROM_RNA_POLYMERASE_III_PROMOTER	GO_TRANSCRIPTION_FROM_RNA_POLYMERASE_III_PROMOTER		36	0.445463	1.39079	0.0568627	0.266141	1	2176	tags=39%, list=19%, signal=48%
GO_OXIDOREDUCTASE_ACTIVITY_ACTING_ON_THE_ALDEHYDE_OR_OXO_GROUP_OF_DONORS_NAD_OR_NADP_AS_ACCEPTOR	GO_OXIDOREDUCTASE_ACTIVITY_ACTING_ON_THE_ALDEHYDE_OR_OXO_GROUP_OF_DONORS_NAD_OR_NADP_AS_ACCEPTOR		22	0.500533	1.38945	0.0767754	0.267631	1	1926	tags=41%, list=17%, signal=49%
GO_PSEUDOURIDINE_SYNTHESIS	GO_PSEUDOURIDINE_SYNTHESIS		17	0.53683	1.38917	0.100205	0.267172	1	2663	tags=47%, list=23%, signal=61%
GO_BINDING_OF_SPERM_TO_ZONA_PELLUCIDA	GO_BINDING_OF_SPERM_TO_ZONA_PELLUCIDA		16	0.538556	1.38539	0.0860656	0.272914	1	1316	tags=38%, list=11%, signal=42%
GO_PYRIMIDINE_CONTAINING_COMPOUND_BIOSYNTHETIC_PROCESS	GO_PYRIMIDINE_CONTAINING_COMPOUND_BIOSYNTHETIC_PROCESS		31	0.465096	1.38488	0.0590476	0.272771	1	2329	tags=39%, list=20%, signal=48%
GO_INTRAMOLECULAR_TRANSFERASE_ACTIVITY	GO_INTRAMOLECULAR_TRANSFERASE_ACTIVITY		24	0.49405	1.38369	0.0759013	0.273826	1	2663	tags=42%, list=23%, signal=54%
GO_SOMATIC_STEM_CELL_POPULATION_MAINTENANCE	GO_SOMATIC_STEM_CELL_POPULATION_MAINTENANCE		38	0.435166	1.38316	0.0682261	0.273874	1	663	tags=24%, list=6%, signal=25%
GO_MICROTUBULE	GO_MICROTUBULE		263	0.327686	1.38254	0.00548446	0.274014	1	2320	tags=28%, list=20%, signal=34%
GO_NEGATIVE_REGULATION_OF_INTRACELLULAR_STEROID_HORMONE_RECEPTOR_SIGNALING_PATHWAY	GO_NEGATIVE_REGULATION_OF_INTRACELLULAR_STEROID_HORMONE_RECEPTOR_SIGNALING_PATHWAY		19	0.52315	1.38041	0.0964567	0.276935	1	1412	tags=21%, list=12%, signal=24%
GO_CELL_SEPARATION_AFTER_CYTOKINESIS	GO_CELL_SEPARATION_AFTER_CYTOKINESIS		17	0.520101	1.37755	0.0990476	0.28131	1	1248	tags=29%, list=11%, signal=33%
GO_HIPPO_SIGNALING	GO_HIPPO_SIGNALING		18	0.524765	1.37723	0.0962264	0.280977	1	2565	tags=28%, list=22%, signal=36%
GO_REGULATION_OF_CELL_CYCLE_ARREST	GO_REGULATION_OF_CELL_CYCLE_ARREST		79	0.383371	1.37627	0.0497132	0.281785	1	2359	tags=34%, list=20%, signal=43%
GO_RNA_METHYLTRANSFERASE_ACTIVITY	GO_RNA_METHYLTRANSFERASE_ACTIVITY		36	0.446082	1.37557	0.0627306	0.282048	1	3045	tags=33%, list=26%, signal=45%
GO_POSITIVE_REGULATION_OF_VIRAL_TRANSCRIPTION	GO_POSITIVE_REGULATION_OF_VIRAL_TRANSCRIPTION		32	0.454247	1.37459	0.0862069	0.282956	1	918	tags=28%, list=8%, signal=30%
GO_REGULATION_OF_MICROTUBULE_BASED_PROCESS	GO_REGULATION_OF_MICROTUBULE_BASED_PROCESS		181	0.337721	1.37298	0.0145719	0.284972	1	2432	tags=32%, list=21%, signal=40%
GO_NUCLEIC_ACID_PHOSPHODIESTER_BOND_HYDROLYSIS	GO_NUCLEIC_ACID_PHOSPHODIESTER_BOND_HYDROLYSIS		200	0.337132	1.37195	0.0202578	0.285939	1	2359	tags=31%, list=20%, signal=38%
GO_MONOSACCHARIDE_BIOSYNTHETIC_PROCESS	GO_MONOSACCHARIDE_BIOSYNTHETIC_PROCESS		40	0.432544	1.37166	0.0608365	0.285533	1	1318	tags=25%, list=11%, signal=28%
GO_PRESPLICEOSOME	GO_PRESPLICEOSOME		20	0.511173	1.37161	0.0878906	0.284706	1	1860	tags=45%, list=16%, signal=54%
GO_PYRIMIDINE_NUCLEOSIDE_BIOSYNTHETIC_PROCESS	GO_PYRIMIDINE_NUCLEOSIDE_BIOSYNTHETIC_PROCESS		23	0.490261	1.37	0.115456	0.286725	1	2647	tags=52%, list=23%, signal=68%
GO_ORGANIC_ANION_TRANSMEMBRANE_TRANSPORTER_ACTIVITY	GO_ORGANIC_ANION_TRANSMEMBRANE_TRANSPORTER_ACTIVITY		76	0.382677	1.36906	0.0441989	0.287515	1	2353	tags=28%, list=20%, signal=34%
GO_NEGATIVE_REGULATION_OF_MRNA_SPLICING_VIA_SPLICEOSOME	GO_NEGATIVE_REGULATION_OF_MRNA_SPLICING_VIA_SPLICEOSOME		17	0.528531	1.36861	0.0935673	0.28737	1	2119	tags=41%, list=18%, signal=50%
GO_DNA_POLYMERASE_ACTIVITY	GO_DNA_POLYMERASE_ACTIVITY		28	0.468023	1.36625	0.0931174	0.290794	1	944	tags=25%, list=8%, signal=27%
GO_CYTOSOLIC_RIBOSOME	GO_CYTOSOLIC_RIBOSOME		103	0.362226	1.36598	0.0255906	0.290319	1	2270	tags=28%, list=20%, signal=35%
GO_PYRIMIDINE_CONTAINING_COMPOUND_METABOLIC_PROCESS	GO_PYRIMIDINE_CONTAINING_COMPOUND_METABOLIC_PROCESS		55	0.401296	1.36565	0.0430712	0.289977	1	2329	tags=35%, list=20%, signal=43%
GO_NUCLEAR_EXPORT	GO_NUCLEAR_EXPORT		130	0.353052	1.36469	0.0199637	0.290848	1	2962	tags=37%, list=26%, signal=49%
GO_STRUCTURE_SPECIFIC_DNA_BINDING	GO_STRUCTURE_SPECIFIC_DNA_BINDING		94	0.367849	1.36421	0.0389864	0.290758	1	2170	tags=30%, list=19%, signal=36%
GO_STEROL_BINDING	GO_STEROL_BINDING		23	0.473741	1.36314	0.076779	0.291862	1	1342	tags=30%, list=12%, signal=34%
GO_TRANSLATION_INITIATION_FACTOR_BINDING	GO_TRANSLATION_INITIATION_FACTOR_BINDING		24	0.483283	1.36238	0.0990291	0.292299	1	1822	tags=29%, list=16%, signal=35%
GO_POSITIVE_REGULATION_OF_DNA_REPLICATION	GO_POSITIVE_REGULATION_OF_DNA_REPLICATION		56	0.405486	1.36183	0.0485981	0.29248	1	1392	tags=32%, list=12%, signal=36%
GO_TRNA_METABOLIC_PROCESS	GO_TRNA_METABOLIC_PROCESS		157	0.343646	1.36141	0.0217391	0.2923	1	2343	tags=29%, list=20%, signal=35%
GO_RRNA_METHYLATION	GO_RRNA_METHYLATION		15	0.520664	1.35733	0.125461	0.298813	1	2226	tags=33%, list=19%, signal=41%
GO_POSITIVE_REGULATION_OF_TELOMERASE_ACTIVITY	GO_POSITIVE_REGULATION_OF_TELOMERASE_ACTIVITY		23	0.473637	1.35412	0.0966469	0.304016	1	1316	tags=39%, list=11%, signal=44%
GO_PYRIMIDINE_NUCLEOSIDE_METABOLIC_PROCESS	GO_PYRIMIDINE_NUCLEOSIDE_METABOLIC_PROCESS		35	0.433568	1.35188	0.0925926	0.307343	1	2329	tags=40%, list=20%, signal=50%
GO_REGULATION_OF_CHROMOSOME_SEGREGATION	GO_REGULATION_OF_CHROMOSOME_SEGREGATION		69	0.389339	1.35037	0.0573013	0.309287	1	2234	tags=41%, list=19%, signal=50%
GO_SNRNA_BINDING	GO_SNRNA_BINDING		32	0.447148	1.34972	0.0943396	0.309509	1	2884	tags=53%, list=25%, signal=71%
GO_AMINO_ACID_BINDING	GO_AMINO_ACID_BINDING		52	0.397819	1.3466	0.0803922	0.314761	1	975	tags=13%, list=8%, signal=15%
GO_REGULATION_OF_GENE_SILENCING	GO_REGULATION_OF_GENE_SILENCING		39	0.428401	1.34598	0.0975104	0.314954	1	2467	tags=38%, list=21%, signal=49%
GO_RESPONSE_TO_CADMIUM_ION	GO_RESPONSE_TO_CADMIUM_ION		27	0.464378	1.34552	0.104364	0.314916	1	1989	tags=30%, list=17%, signal=36%
GO_RNA_PHOSPHODIESTER_BOND_HYDROLYSIS_ENDONUCLEOLYTIC	GO_RNA_PHOSPHODIESTER_BOND_HYDROLYSIS_ENDONUCLEOLYTIC		47	0.411457	1.34537	0.0742857	0.31423	1	969	tags=23%, list=8%, signal=25%
GO_ORGAN_REGENERATION	GO_ORGAN_REGENERATION		55	0.401093	1.34366	0.0722433	0.316663	1	1703	tags=31%, list=15%, signal=36%
GO_PRE_MRNA_BINDING	GO_PRE_MRNA_BINDING		24	0.477365	1.34207	0.0890538	0.318887	1	2119	tags=42%, list=18%, signal=51%
GO_THIOL_DEPENDENT_UBIQUITIN_SPECIFIC_PROTEASE_ACTIVITY	GO_THIOL_DEPENDENT_UBIQUITIN_SPECIFIC_PROTEASE_ACTIVITY		59	0.392054	1.3417	0.0488722	0.318689	1	3474	tags=37%, list=30%, signal=53%
GO_NUCLEOBASE_CONTAINING_COMPOUND_TRANSPORT	GO_NUCLEOBASE_CONTAINING_COMPOUND_TRANSPORT		165	0.333215	1.34128	0.0280899	0.318501	1	2962	tags=34%, list=26%, signal=45%
GO_SPINDLE_MIDZONE	GO_SPINDLE_MIDZONE		21	0.498109	1.34114	0.141717	0.317831	1	2161	tags=48%, list=19%, signal=58%
GO_TRANSLATION_FACTOR_ACTIVITY_RNA_BINDING	GO_TRANSLATION_FACTOR_ACTIVITY_RNA_BINDING		77	0.375374	1.34089	0.0600775	0.317344	1	3021	tags=39%, list=26%, signal=52%
GO_ANION_TRANSMEMBRANE_TRANSPORT	GO_ANION_TRANSMEMBRANE_TRANSPORT		100	0.35516	1.338	0.0411765	0.32214	1	1453	tags=19%, list=13%, signal=22%
GO_ANDROGEN_RECEPTOR_SIGNALING_PATHWAY	GO_ANDROGEN_RECEPTOR_SIGNALING_PATHWAY		35	0.439114	1.33764	0.0945946	0.32182	1	2157	tags=31%, list=19%, signal=39%
GO_REGULATION_OF_MITOTIC_CELL_CYCLE	GO_REGULATION_OF_MITOTIC_CELL_CYCLE		367	0.304683	1.33342	0.00549451	0.329089	1	2265	tags=27%, list=20%, signal=32%
GO_REGULATION_OF_DNA_REPLICATION	GO_REGULATION_OF_DNA_REPLICATION		117	0.346627	1.33238	0.0384615	0.3302	1	2418	tags=35%, list=21%, signal=44%
GO_FEMALE_MEIOTIC_DIVISION	GO_FEMALE_MEIOTIC_DIVISION		16	0.518696	1.33238	0.119545	0.32921	1	1416	tags=31%, list=12%, signal=36%
GO_NON_RECOMBINATIONAL_REPAIR	GO_NON_RECOMBINATIONAL_REPAIR		61	0.387261	1.33116	0.0693642	0.330692	1	1426	tags=21%, list=12%, signal=24%
GO_PEPTIDYL_LYSINE_MODIFICATION	GO_PEPTIDYL_LYSINE_MODIFICATION		245	0.318605	1.33065	0.0211946	0.330796	1	2977	tags=35%, list=26%, signal=46%
GO_REGULATION_OF_LIGASE_ACTIVITY	GO_REGULATION_OF_LIGASE_ACTIVITY		114	0.350337	1.33047	0.0462428	0.330156	1	2627	tags=38%, list=23%, signal=48%
GO_NEGATIVE_REGULATION_OF_CYTOSKELETON_ORGANIZATION	GO_NEGATIVE_REGULATION_OF_CYTOSKELETON_ORGANIZATION		158	0.331591	1.33036	0.0270793	0.329377	1	2536	tags=34%, list=22%, signal=43%
GO_ORGANELLE_ENVELOPE_LUMEN	GO_ORGANELLE_ENVELOPE_LUMEN		61	0.386032	1.33035	0.0714286	0.328426	1	1581	tags=21%, list=14%, signal=25%
GO_CHROMATIN_REMODELING	GO_CHROMATIN_REMODELING		113	0.349902	1.32849	0.0584677	0.331195	1	1536	tags=19%, list=13%, signal=22%
GO_ATP_DEPENDENT_DNA_HELICASE_ACTIVITY	GO_ATP_DEPENDENT_DNA_HELICASE_ACTIVITY		32	0.438548	1.32823	0.136719	0.330698	1	2054	tags=38%, list=18%, signal=45%
GO_CENTROSOME	GO_CENTROSOME		373	0.302283	1.32786	0.00909091	0.33042	1	2574	tags=28%, list=22%, signal=35%
GO_NUCLEOSIDE_MONOPHOSPHATE_BIOSYNTHETIC_PROCESS	GO_NUCLEOSIDE_MONOPHOSPHATE_BIOSYNTHETIC_PROCESS		66	0.378681	1.32755	0.066	0.330075	1	2197	tags=38%, list=19%, signal=46%
GO_MICROTUBULE_ORGANIZING_CENTER_ORGANIZATION	GO_MICROTUBULE_ORGANIZING_CENTER_ORGANIZATION		69	0.372096	1.32553	0.0598131	0.333134	1	1529	tags=22%, list=13%, signal=25%
GO_GLYCERALDEHYDE_3_PHOSPHATE_METABOLIC_PROCESS	GO_GLYCERALDEHYDE_3_PHOSPHATE_METABOLIC_PROCESS		15	0.533081	1.32479	0.155206	0.33361	1	589	tags=27%, list=5%, signal=28%
GO_MITOCHONDRIAL_MATRIX	GO_MITOCHONDRIAL_MATRIX		343	0.305403	1.32466	0.00905797	0.332881	1	2431	tags=28%, list=21%, signal=34%
GO_RNA_MODIFICATION	GO_RNA_MODIFICATION		100	0.358325	1.32439	0.054717	0.332505	1	1894	tags=25%, list=16%, signal=30%
GO_MICROTUBULE_BASED_PROCESS	GO_MICROTUBULE_BASED_PROCESS		343	0.302288	1.32438	0.0110906	0.331574	1	2552	tags=29%, list=22%, signal=36%
GO_POSITIVE_REGULATION_OF_CELL_CYCLE_PROCESS	GO_POSITIVE_REGULATION_OF_CELL_CYCLE_PROCESS		169	0.331499	1.32353	0.0307414	0.332449	1	2504	tags=33%, list=22%, signal=42%
GO_ACTOMYOSIN_STRUCTURE_ORGANIZATION	GO_ACTOMYOSIN_STRUCTURE_ORGANIZATION		40	0.421502	1.32301	0.102913	0.332505	1	880	tags=23%, list=8%, signal=24%
GO_VITAMIN_BINDING	GO_VITAMIN_BINDING		38	0.416064	1.32202	0.113546	0.333568	1	371	tags=16%, list=3%, signal=16%
GO_INO80_TYPE_COMPLEX	GO_INO80_TYPE_COMPLEX		20	0.48811	1.3218	0.122486	0.333064	1	2006	tags=45%, list=17%, signal=54%
GO_PROTEIN_IMPORT	GO_PROTEIN_IMPORT		122	0.341412	1.32175	0.0491159	0.332203	1	1891	tags=20%, list=16%, signal=24%
GO_REGULATION_OF_HEMATOPOIETIC_PROGENITOR_CELL_DIFFERENTIATION	GO_REGULATION_OF_HEMATOPOIETIC_PROGENITOR_CELL_DIFFERENTIATION		32	0.433318	1.3211	0.097561	0.332569	1	718	tags=16%, list=6%, signal=17%
GO_ASPARTATE_FAMILY_AMINO_ACID_BIOSYNTHETIC_PROCESS	GO_ASPARTATE_FAMILY_AMINO_ACID_BIOSYNTHETIC_PROCESS		19	0.489344	1.31952	0.11811	0.334911	1	4407	tags=63%, list=38%, signal=102%
GO_REGULATION_OF_RHODOPSIN_MEDIATED_SIGNALING_PATHWAY	GO_REGULATION_OF_RHODOPSIN_MEDIATED_SIGNALING_PATHWAY		15	0.515461	1.31941	0.135397	0.334182	1	991	tags=20%, list=9%, signal=22%
GO_REGULATION_OF_SPINDLE_ORGANIZATION	GO_REGULATION_OF_SPINDLE_ORGANIZATION		19	0.494531	1.31862	0.131528	0.334893	1	1802	tags=37%, list=16%, signal=44%
GO_NUCLEAR_PERIPHERY	GO_NUCLEAR_PERIPHERY		97	0.353925	1.31768	0.0474383	0.335711	1	3110	tags=46%, list=27%, signal=63%
GO_RNA_PHOSPHODIESTER_BOND_HYDROLYSIS	GO_RNA_PHOSPHODIESTER_BOND_HYDROLYSIS		96	0.350055	1.31643	0.0654206	0.337354	1	2414	tags=33%, list=21%, signal=42%
GO_PURINE_NUCLEOSIDE_BIOSYNTHETIC_PROCESS	GO_PURINE_NUCLEOSIDE_BIOSYNTHETIC_PROCESS		70	0.369668	1.31534	0.077634	0.338556	1	2436	tags=36%, list=21%, signal=45%
GO_NUCLEAR_MATRIX	GO_NUCLEAR_MATRIX		77	0.366627	1.31445	0.075	0.339396	1	3110	tags=48%, list=27%, signal=65%
GO_PYRIMIDINE_NUCLEOTIDE_METABOLIC_PROCESS	GO_PYRIMIDINE_NUCLEOTIDE_METABOLIC_PROCESS		37	0.421744	1.31379	0.1	0.339764	1	2329	tags=35%, list=20%, signal=44%
GO_DNA_DIRECTED_RNA_POLYMERASE_III_COMPLEX	GO_DNA_DIRECTED_RNA_POLYMERASE_III_COMPLEX		18	0.497694	1.31205	0.128655	0.342322	1	1458	tags=33%, list=13%, signal=38%
GO_CHROMATIN_DNA_BINDING	GO_CHROMATIN_DNA_BINDING		60	0.382754	1.31063	0.0795918	0.344288	1	2006	tags=30%, list=17%, signal=36%
GO_REGULATION_OF_SISTER_CHROMATID_SEGREGATION	GO_REGULATION_OF_SISTER_CHROMATID_SEGREGATION		55	0.386514	1.30893	0.0836735	0.346886	1	2234	tags=42%, list=19%, signal=52%
GO_NUCLEAR_REPLICATION_FORK	GO_NUCLEAR_REPLICATION_FORK		38	0.417926	1.30845	0.107632	0.346845	1	1876	tags=26%, list=16%, signal=31%
GO_O_METHYLTRANSFERASE_ACTIVITY	GO_O_METHYLTRANSFERASE_ACTIVITY		15	0.514545	1.30632	0.135029	0.350241	1	704	tags=20%, list=6%, signal=21%
GO_DEVELOPMENTAL_PIGMENTATION	GO_DEVELOPMENTAL_PIGMENTATION		23	0.461783	1.30612	0.130612	0.349664	1	553	tags=13%, list=5%, signal=14%
GO_L_AMINO_ACID_TRANSPORT	GO_L_AMINO_ACID_TRANSPORT		27	0.447783	1.30359	0.11946	0.354093	1	661	tags=19%, list=6%, signal=20%
GO_ENDORIBONUCLEASE_COMPLEX	GO_ENDORIBONUCLEASE_COMPLEX		16	0.493028	1.30197	0.157895	0.356576	1	1373	tags=44%, list=12%, signal=50%
GO_NUCLEOSIDE_PHOSPHATE_BIOSYNTHETIC_PROCESS	GO_NUCLEOSIDE_PHOSPHATE_BIOSYNTHETIC_PROCESS		132	0.333017	1.30034	0.0464684	0.359121	1	2436	tags=32%, list=21%, signal=40%
GO_REGULATION_OF_TELOMERE_MAINTENANCE	GO_REGULATION_OF_TELOMERE_MAINTENANCE		59	0.376166	1.29492	0.110687	0.369712	1	2188	tags=32%, list=19%, signal=40%
GO_MALE_MEIOSIS	GO_MALE_MEIOSIS		16	0.507334	1.29407	0.146388	0.370555	1	1240	tags=38%, list=11%, signal=42%
GO_CYTOSOLIC_PART	GO_CYTOSOLIC_PART		186	0.316236	1.29393	0.0340265	0.369861	1	2270	tags=26%, list=20%, signal=32%
GO_MACROAUTOPHAGY	GO_MACROAUTOPHAGY		203	0.312059	1.29166	0.0287356	0.373796	1	2329	tags=23%, list=20%, signal=28%
GO_TBP_CLASS_PROTEIN_BINDING	GO_TBP_CLASS_PROTEIN_BINDING		19	0.481773	1.29018	0.143396	0.376024	1	3657	tags=47%, list=32%, signal=69%
GO_REGULATION_OF_MEIOTIC_NUCLEAR_DIVISION	GO_REGULATION_OF_MEIOTIC_NUCLEAR_DIVISION		15	0.495616	1.28867	0.172348	0.378384	1	3753	tags=47%, list=32%, signal=69%
GO_DNA_REPAIR_COMPLEX	GO_DNA_REPAIR_COMPLEX		36	0.41632	1.28862	0.118868	0.377485	1	1163	tags=28%, list=10%, signal=31%
GO_T_CELL_HOMEOSTASIS	GO_T_CELL_HOMEOSTASIS		25	0.451492	1.28637	0.148571	0.381476	1	485	tags=16%, list=4%, signal=17%
GO_SODIUM_ION_TRANSMEMBRANE_TRANSPORTER_ACTIVITY	GO_SODIUM_ION_TRANSMEMBRANE_TRANSPORTER_ACTIVITY		47	0.395212	1.28587	0.117978	0.381494	1	2090	tags=28%, list=18%, signal=34%
GO_MLL1_2_COMPLEX	GO_MLL1_2_COMPLEX		25	0.446002	1.28522	0.152805	0.381969	1	3217	tags=44%, list=28%, signal=61%
GO_PRECATALYTIC_SPLICEOSOME	GO_PRECATALYTIC_SPLICEOSOME		20	0.471734	1.28502	0.178645	0.381422	1	2513	tags=50%, list=22%, signal=64%
GO_POSITIVE_REGULATION_OF_VIRAL_PROCESS	GO_POSITIVE_REGULATION_OF_VIRAL_PROCESS		78	0.360748	1.28426	0.101145	0.382174	1	1336	tags=22%, list=12%, signal=24%
GO_UBIQUITIN_LIKE_PROTEIN_SPECIFIC_PROTEASE_ACTIVITY	GO_UBIQUITIN_LIKE_PROTEIN_SPECIFIC_PROTEASE_ACTIVITY		76	0.359908	1.28373	0.0905588	0.382377	1	3474	tags=37%, list=30%, signal=52%
GO_MICROTUBULE_ASSOCIATED_COMPLEX	GO_MICROTUBULE_ASSOCIATED_COMPLEX		89	0.352901	1.28248	0.085389	0.384171	1	2653	tags=34%, list=23%, signal=43%
GO_NUCLEASE_ACTIVITY	GO_NUCLEASE_ACTIVITY		158	0.32191	1.28229	0.0440613	0.383597	1	2414	tags=28%, list=21%, signal=35%
GO_SPERM_FLAGELLUM	GO_SPERM_FLAGELLUM		26	0.442926	1.28112	0.13035	0.385234	1	187	tags=15%, list=2%, signal=16%
GO_NEGATIVE_REGULATION_OF_PROTEIN_BINDING	GO_NEGATIVE_REGULATION_OF_PROTEIN_BINDING		59	0.368353	1.2801	0.0808271	0.386517	1	2642	tags=37%, list=23%, signal=48%
GO_RIBOSOMAL_LARGE_SUBUNIT_ASSEMBLY	GO_RIBOSOMAL_LARGE_SUBUNIT_ASSEMBLY		21	0.468988	1.27998	0.154297	0.385777	1	2181	tags=43%, list=19%, signal=53%
GO_FOLIC_ACID_CONTAINING_COMPOUND_METABOLIC_PROCESS	GO_FOLIC_ACID_CONTAINING_COMPOUND_METABOLIC_PROCESS		18	0.484243	1.2797	0.180791	0.385387	1	4407	tags=67%, list=38%, signal=107%
GO_PITUITARY_GLAND_DEVELOPMENT	GO_PITUITARY_GLAND_DEVELOPMENT		15	0.508468	1.27954	0.149701	0.384753	1	537	tags=33%, list=5%, signal=35%
GO_CARDIAC_CELL_DEVELOPMENT	GO_CARDIAC_CELL_DEVELOPMENT		24	0.452606	1.27938	0.138996	0.38411	1	3063	tags=42%, list=26%, signal=57%
GO_NUCLEOTIDE_EXCISION_REPAIR_DNA_DAMAGE_RECOGNITION	GO_NUCLEOTIDE_EXCISION_REPAIR_DNA_DAMAGE_RECOGNITION		23	0.455252	1.27814	0.151402	0.385774	1	2212	tags=43%, list=19%, signal=54%
GO_NUCLEAR_IMPORT	GO_NUCLEAR_IMPORT		104	0.339647	1.27772	0.0717054	0.385747	1	942	tags=13%, list=8%, signal=13%
GO_POSITIVE_REGULATION_OF_RESPONSE_TO_DNA_DAMAGE_STIMULUS	GO_POSITIVE_REGULATION_OF_RESPONSE_TO_DNA_DAMAGE_STIMULUS		49	0.387209	1.27744	0.106	0.385412	1	1813	tags=29%, list=16%, signal=34%
GO_RIBOSOMAL_LARGE_SUBUNIT_BIOGENESIS	GO_RIBOSOMAL_LARGE_SUBUNIT_BIOGENESIS		45	0.390822	1.27657	0.129897	0.386318	1	2243	tags=36%, list=19%, signal=44%
GO_U2_TYPE_PRESPLICEOSOME	GO_U2_TYPE_PRESPLICEOSOME		15	0.514055	1.27588	0.155556	0.386922	1	1860	tags=47%, list=16%, signal=56%
GO_NEGATIVE_REGULATION_OF_PROTEIN_CATABOLIC_PROCESS	GO_NEGATIVE_REGULATION_OF_PROTEIN_CATABOLIC_PROCESS		78	0.355401	1.27348	0.0745455	0.391362	1	3054	tags=40%, list=26%, signal=54%
GO_RIBONUCLEASE_ACTIVITY	GO_RIBONUCLEASE_ACTIVITY		75	0.358379	1.27335	0.0967153	0.390671	1	2414	tags=33%, list=21%, signal=42%
GO_NEGATIVE_REGULATION_OF_RESPONSE_TO_EXTRACELLULAR_STIMULUS	GO_NEGATIVE_REGULATION_OF_RESPONSE_TO_EXTRACELLULAR_STIMULUS		27	0.442965	1.27317	0.166359	0.390074	1	1323	tags=30%, list=11%, signal=33%
GO_MICROTUBULE_ORGANIZING_CENTER	GO_MICROTUBULE_ORGANIZING_CENTER		467	0.282309	1.27304	0.0137221	0.389364	1	2846	tags=30%, list=25%, signal=38%
GO_REGULATION_OF_DNA_BIOSYNTHETIC_PROCESS	GO_REGULATION_OF_DNA_BIOSYNTHETIC_PROCESS		69	0.360379	1.27289	0.0990099	0.388704	1	1316	tags=28%, list=11%, signal=31%
GO_MULTI_ORGANISM_METABOLIC_PROCESS	GO_MULTI_ORGANISM_METABOLIC_PROCESS		133	0.327268	1.27253	0.0789474	0.38852	1	2363	tags=26%, list=20%, signal=33%
GO_REGULATION_OF_PROTEIN_UBIQUITINATION_INVOLVED_IN_UBIQUITIN_DEPENDENT_PROTEIN_CATABOLIC_PROCESS	GO_REGULATION_OF_PROTEIN_UBIQUITINATION_INVOLVED_IN_UBIQUITIN_DEPENDENT_PROTEIN_CATABOLIC_PROCESS		87	0.348111	1.27221	0.104478	0.388245	1	2518	tags=36%, list=22%, signal=45%
GO_CENTRIOLE	GO_CENTRIOLE		76	0.354137	1.27187	0.113106	0.388056	1	2428	tags=36%, list=21%, signal=45%
GO_NEGATIVE_REGULATION_OF_TELOMERE_MAINTENANCE_VIA_TELOMERE_LENGTHENING	GO_NEGATIVE_REGULATION_OF_TELOMERE_MAINTENANCE_VIA_TELOMERE_LENGTHENING		16	0.490846	1.27172	0.147348	0.387442	1	2188	tags=44%, list=19%, signal=54%
GO_METHYLATION	GO_METHYLATION		191	0.312899	1.27166	0.0488246	0.386619	1	1970	tags=26%, list=17%, signal=30%
GO_MEIOTIC_CHROMOSOME_SEGREGATION	GO_MEIOTIC_CHROMOSOME_SEGREGATION		30	0.432083	1.27124	0.158397	0.386538	1	2504	tags=47%, list=22%, signal=59%
GO_CELLULAR_AMINO_ACID_CATABOLIC_PROCESS	GO_CELLULAR_AMINO_ACID_CATABOLIC_PROCESS		72	0.356425	1.27063	0.0773694	0.386982	1	1709	tags=22%, list=15%, signal=26%
GO_MITOTIC_DNA_INTEGRITY_CHECKPOINT	GO_MITOTIC_DNA_INTEGRITY_CHECKPOINT		82	0.344145	1.26941	0.105461	0.388841	1	2234	tags=33%, list=19%, signal=41%
GO_MITOTIC_G2_M_TRANSITION_CHECKPOINT	GO_MITOTIC_G2_M_TRANSITION_CHECKPOINT		15	0.492255	1.26804	0.172608	0.390853	1	3448	tags=67%, list=30%, signal=95%
GO_RNA_CATABOLIC_PROCESS	GO_RNA_CATABOLIC_PROCESS		204	0.304379	1.26791	0.0488722	0.390199	1	2425	tags=30%, list=21%, signal=37%
GO_PEPTIDE_METABOLIC_PROCESS	GO_PEPTIDE_METABOLIC_PROCESS		454	0.282531	1.26412	0.0106007	0.3981	1	2593	tags=27%, list=22%, signal=33%
GO_RIBOSOME_ASSEMBLY	GO_RIBOSOME_ASSEMBLY		46	0.3854	1.26157	0.125737	0.403032	1	2346	tags=35%, list=20%, signal=43%
GO_RESPONSE_TO_XENOBIOTIC_STIMULUS	GO_RESPONSE_TO_XENOBIOTIC_STIMULUS		49	0.385791	1.26099	0.134241	0.40343	1	1024	tags=20%, list=9%, signal=22%
GO_METHYLATED_HISTONE_BINDING	GO_METHYLATED_HISTONE_BINDING		42	0.395325	1.26044	0.148776	0.403749	1	2308	tags=33%, list=20%, signal=41%
GO_ANION_TRANSMEMBRANE_TRANSPORTER_ACTIVITY	GO_ANION_TRANSMEMBRANE_TRANSPORTER_ACTIVITY		117	0.335166	1.26017	0.088015	0.403395	1	815	tags=14%, list=7%, signal=15%
GO_NEGATIVE_REGULATION_OF_CELLULAR_CATABOLIC_PROCESS	GO_NEGATIVE_REGULATION_OF_CELLULAR_CATABOLIC_PROCESS		112	0.330392	1.25966	0.0842697	0.403456	1	3329	tags=39%, list=29%, signal=55%
GO_U4_U6_X_U5_TRI_SNRNP_COMPLEX	GO_U4_U6_X_U5_TRI_SNRNP_COMPLEX		18	0.471813	1.25952	0.184762	0.402819	1	2278	tags=44%, list=20%, signal=55%
GO_REGULATION_OF_DNA_METABOLIC_PROCESS	GO_REGULATION_OF_DNA_METABOLIC_PROCESS		248	0.298249	1.25594	0.0416667	0.410083	1	2191	tags=27%, list=19%, signal=33%
GO_CHROMATIN_BINDING	GO_CHROMATIN_BINDING		310	0.291486	1.25588	0.0379061	0.409232	1	2101	tags=24%, list=18%, signal=29%
GO_ORGANIC_ACID_TRANSPORT	GO_ORGANIC_ACID_TRANSPORT		124	0.323134	1.25572	0.0869565	0.408645	1	1449	tags=19%, list=13%, signal=21%
GO_DEACETYLASE_ACTIVITY	GO_DEACETYLASE_ACTIVITY		44	0.38832	1.25462	0.141221	0.410304	1	1256	tags=16%, list=11%, signal=18%
GO_CARDIAC_CHAMBER_MORPHOGENESIS	GO_CARDIAC_CHAMBER_MORPHOGENESIS		48	0.383342	1.25255	0.148936	0.414193	1	1228	tags=19%, list=11%, signal=21%
GO_PROTEIN_MODIFICATION_BY_SMALL_PROTEIN_REMOVAL	GO_PROTEIN_MODIFICATION_BY_SMALL_PROTEIN_REMOVAL		91	0.341198	1.2525	0.097786	0.413308	1	2342	tags=23%, list=20%, signal=29%
GO_POSITIVE_REGULATION_OF_CELL_CYCLE_ARREST	GO_POSITIVE_REGULATION_OF_CELL_CYCLE_ARREST		65	0.364706	1.25185	0.123529	0.413849	1	2502	tags=37%, list=22%, signal=47%
GO_MECHANORECEPTOR_DIFFERENTIATION	GO_MECHANORECEPTOR_DIFFERENTIATION		26	0.43978	1.25166	0.167323	0.413314	1	1124	tags=27%, list=10%, signal=30%
GO_RECIPROCAL_DNA_RECOMBINATION	GO_RECIPROCAL_DNA_RECOMBINATION		25	0.442256	1.25117	0.168561	0.413485	1	2142	tags=44%, list=18%, signal=54%
GO_MICROTUBULE_BASED_MOVEMENT	GO_MICROTUBULE_BASED_MOVEMENT		131	0.324473	1.25103	0.0898662	0.412842	1	2728	tags=33%, list=24%, signal=42%
GO_CATION_CATION_ANTIPORTER_ACTIVITY	GO_CATION_CATION_ANTIPORTER_ACTIVITY		15	0.498674	1.25059	0.204934	0.412879	1	3232	tags=53%, list=28%, signal=74%
GO_HYALURONAN_METABOLIC_PROCESS	GO_HYALURONAN_METABOLIC_PROCESS		15	0.489369	1.24867	0.188645	0.416449	1	2556	tags=40%, list=22%, signal=51%
GO_METHYL_CPG_BINDING	GO_METHYL_CPG_BINDING		15	0.486133	1.2477	0.205078	0.41766	1	2308	tags=33%, list=20%, signal=42%
GO_GLUTATHIONE_METABOLIC_PROCESS	GO_GLUTATHIONE_METABOLIC_PROCESS		40	0.387818	1.24767	0.155357	0.416753	1	1167	tags=25%, list=10%, signal=28%
GO_PRESYNAPTIC_MEMBRANE	GO_PRESYNAPTIC_MEMBRANE		25	0.435232	1.24486	0.192982	0.42229	1	2780	tags=40%, list=24%, signal=53%
GO_POSITIVE_REGULATION_OF_CELL_CYCLE_PHASE_TRANSITION	GO_POSITIVE_REGULATION_OF_CELL_CYCLE_PHASE_TRANSITION		51	0.375504	1.24482	0.116105	0.421406	1	2247	tags=29%, list=19%, signal=36%
GO_PROTEIN_LOCALIZATION_TO_CHROMOSOME	GO_PROTEIN_LOCALIZATION_TO_CHROMOSOME		31	0.417738	1.24463	0.177515	0.420857	1	2161	tags=39%, list=19%, signal=47%
GO_HISTONE_H3_K4_METHYLATION	GO_HISTONE_H3_K4_METHYLATION		22	0.445723	1.24394	0.166045	0.421508	1	3580	tags=59%, list=31%, signal=85%
GO_PROTEIN_K63_LINKED_DEUBIQUITINATION	GO_PROTEIN_K63_LINKED_DEUBIQUITINATION		18	0.474171	1.24386	0.197368	0.420719	1	2716	tags=39%, list=23%, signal=51%
GO_SOLUTE_SODIUM_SYMPORTER_ACTIVITY	GO_SOLUTE_SODIUM_SYMPORTER_ACTIVITY		15	0.490476	1.24337	0.173828	0.42101	1	1171	tags=27%, list=10%, signal=30%
GO_REPLISOME	GO_REPLISOME		28	0.42023	1.24225	0.18232	0.422667	1	2561	tags=36%, list=22%, signal=46%
GO_MITOTIC_SPINDLE	GO_MITOTIC_SPINDLE		46	0.381761	1.24098	0.137795	0.424627	1	3210	tags=41%, list=28%, signal=57%
GO_AMIDE_BIOSYNTHETIC_PROCESS	GO_AMIDE_BIOSYNTHETIC_PROCESS		428	0.277756	1.23941	0.0213144	0.427393	1	2593	tags=27%, list=22%, signal=34%
GO_CHROMATIN_MODIFICATION	GO_CHROMATIN_MODIFICATION		414	0.281723	1.23765	0.0214286	0.43075	1	2318	tags=24%, list=20%, signal=29%
GO_NUCLEAR_TRANSCRIBED_MRNA_CATABOLIC_PROCESS_EXONUCLEOLYTIC	GO_NUCLEAR_TRANSCRIBED_MRNA_CATABOLIC_PROCESS_EXONUCLEOLYTIC		30	0.410525	1.23687	0.163569	0.431639	1	3081	tags=50%, list=27%, signal=68%
GO_PYRIMIDINE_RIBONUCLEOTIDE_METABOLIC_PROCESS	GO_PYRIMIDINE_RIBONUCLEOTIDE_METABOLIC_PROCESS		18	0.464796	1.23247	0.223909	0.441263	1	2647	tags=44%, list=23%, signal=58%
GO_REGULATION_OF_CENTROSOME_CYCLE	GO_REGULATION_OF_CENTROSOME_CYCLE		33	0.404988	1.23199	0.155303	0.441457	1	3025	tags=42%, list=26%, signal=57%
GO_DNA_SECONDARY_STRUCTURE_BINDING	GO_DNA_SECONDARY_STRUCTURE_BINDING		22	0.452185	1.23178	0.197674	0.440986	1	2159	tags=41%, list=19%, signal=50%
GO_MACROMOLECULE_DEACYLATION	GO_MACROMOLECULE_DEACYLATION		57	0.361931	1.23163	0.158824	0.440338	1	878	tags=14%, list=8%, signal=15%
GO_CILIARY_BASAL_BODY	GO_CILIARY_BASAL_BODY		58	0.355404	1.23157	0.145873	0.439507	1	1124	tags=17%, list=10%, signal=19%
GO_GENITALIA_DEVELOPMENT	GO_GENITALIA_DEVELOPMENT		17	0.473954	1.23142	0.212598	0.438877	1	446	tags=18%, list=4%, signal=18%
GO_TOXIN_TRANSPORT	GO_TOXIN_TRANSPORT		28	0.42747	1.22744	0.195255	0.447598	1	2021	tags=43%, list=17%, signal=52%
GO_TRANSFERASE_COMPLEX_TRANSFERRING_PHOSPHORUS_CONTAINING_GROUPS	GO_TRANSFERASE_COMPLEX_TRANSFERRING_PHOSPHORUS_CONTAINING_GROUPS		207	0.297365	1.22731	0.0803059	0.446921	1	3115	tags=36%, list=27%, signal=49%
GO_EXONUCLEASE_ACTIVITY_ACTIVE_WITH_EITHER_RIBO_OR_DEOXYRIBONUCLEIC_ACIDS_AND_PRODUCING_5_PHOSPHOMONOESTERS	GO_EXONUCLEASE_ACTIVITY_ACTIVE_WITH_EITHER_RIBO_OR_DEOXYRIBONUCLEIC_ACIDS_AND_PRODUCING_5_PHOSPHOMONOESTERS		38	0.388781	1.22713	0.169697	0.446396	1	2991	tags=37%, list=26%, signal=50%
GO_INTERMEDIATE_FILAMENT_CYTOSKELETON	GO_INTERMEDIATE_FILAMENT_CYTOSKELETON		65	0.350114	1.22635	0.139048	0.447352	1	1898	tags=25%, list=16%, signal=29%
GO_PEPTIDE_RECEPTOR_ACTIVITY	GO_PEPTIDE_RECEPTOR_ACTIVITY		37	0.3923	1.22545	0.191489	0.448437	1	196	tags=8%, list=2%, signal=8%
GO_ACETYLTRANSFERASE_COMPLEX	GO_ACETYLTRANSFERASE_COMPLEX		79	0.338823	1.22513	0.131827	0.448252	1	2935	tags=35%, list=25%, signal=47%
GO_PHOSPHOTRANSFERASE_ACTIVITY_PHOSPHATE_GROUP_AS_ACCEPTOR	GO_PHOSPHOTRANSFERASE_ACTIVITY_PHOSPHATE_GROUP_AS_ACCEPTOR		26	0.425946	1.22236	0.188525	0.453792	1	2329	tags=42%, list=20%, signal=53%
GO_REGULATION_OF_CELL_CYCLE_PHASE_TRANSITION	GO_REGULATION_OF_CELL_CYCLE_PHASE_TRANSITION		258	0.288135	1.22124	0.0849421	0.455624	1	2359	tags=30%, list=20%, signal=37%
GO_SOMATIC_DIVERSIFICATION_OF_IMMUNOGLOBULINS	GO_SOMATIC_DIVERSIFICATION_OF_IMMUNOGLOBULINS		26	0.429205	1.2191	0.193078	0.459917	1	1880	tags=35%, list=16%, signal=41%
GO_TRANSCRIPTION_ELONGATION_FACTOR_COMPLEX	GO_TRANSCRIPTION_ELONGATION_FACTOR_COMPLEX		38	0.386466	1.21718	0.191617	0.463757	1	3206	tags=47%, list=28%, signal=65%
GO_REGULATION_OF_CYTOKINESIS	GO_REGULATION_OF_CYTOKINESIS		46	0.376516	1.21584	0.166969	0.466185	1	2696	tags=33%, list=23%, signal=42%
GO_ACTIN_FILAMENT_BUNDLE	GO_ACTIN_FILAMENT_BUNDLE		34	0.394738	1.21481	0.173333	0.467834	1	2065	tags=26%, list=18%, signal=32%
GO_LIGAND_GATED_CHANNEL_ACTIVITY	GO_LIGAND_GATED_CHANNEL_ACTIVITY		37	0.387902	1.2147	0.17126	0.467066	1	188	tags=8%, list=2%, signal=8%
GO_HISTONE_MRNA_METABOLIC_PROCESS	GO_HISTONE_MRNA_METABOLIC_PROCESS		26	0.422302	1.21442	0.208577	0.466702	1	1974	tags=27%, list=17%, signal=32%
GO_REGULATION_OF_TRANSCRIPTION_INVOLVED_IN_G1_S_TRANSITION_OF_MITOTIC_CELL_CYCLE	GO_REGULATION_OF_TRANSCRIPTION_INVOLVED_IN_G1_S_TRANSITION_OF_MITOTIC_CELL_CYCLE		23	0.434209	1.21428	0.212355	0.466033	1	2502	tags=35%, list=22%, signal=44%
GO_ORGANELLE_ASSEMBLY	GO_ORGANELLE_ASSEMBLY		339	0.28045	1.21386	0.050173	0.466054	1	2284	tags=24%, list=20%, signal=29%
GO_TETRAHYDROFOLATE_METABOLIC_PROCESS	GO_TETRAHYDROFOLATE_METABOLIC_PROCESS		15	0.476523	1.21352	0.226667	0.465841	1	4181	tags=60%, list=36%, signal=94%
GO_NEGATIVE_REGULATION_OF_MYELOID_CELL_DIFFERENTIATION	GO_NEGATIVE_REGULATION_OF_MYELOID_CELL_DIFFERENTIATION		55	0.362024	1.21238	0.179752	0.467775	1	351	tags=11%, list=3%, signal=11%
GO_LAMELLIPODIUM_ASSEMBLY	GO_LAMELLIPODIUM_ASSEMBLY		23	0.440381	1.21113	0.212476	0.469792	1	346	tags=13%, list=3%, signal=13%
GO_DNA_DIRECTED_RNA_POLYMERASE_II_HOLOENZYME	GO_DNA_DIRECTED_RNA_POLYMERASE_II_HOLOENZYME		88	0.334863	1.21045	0.153226	0.470636	1	3495	tags=45%, list=30%, signal=65%
GO_TRABECULA_MORPHOGENESIS	GO_TRABECULA_MORPHOGENESIS		22	0.442557	1.20844	0.223282	0.474641	1	756	tags=14%, list=7%, signal=15%
GO_COVALENT_CHROMATIN_MODIFICATION	GO_COVALENT_CHROMATIN_MODIFICATION		257	0.284313	1.20703	0.0641026	0.477226	1	2318	tags=25%, list=20%, signal=30%
GO_TRNA_METHYLTRANSFERASE_ACTIVITY	GO_TRNA_METHYLTRANSFERASE_ACTIVITY		17	0.46006	1.2067	0.222222	0.477095	1	3045	tags=41%, list=26%, signal=56%
GO_NUCLEOBASE_CONTAINING_COMPOUND_KINASE_ACTIVITY	GO_NUCLEOBASE_CONTAINING_COMPOUND_KINASE_ACTIVITY		34	0.392201	1.20462	0.19403	0.481476	1	2345	tags=44%, list=20%, signal=55%
GO_CELL_AGING	GO_CELL_AGING		49	0.362267	1.20385	0.169202	0.482468	1	3085	tags=39%, list=27%, signal=53%
GO_H4_HISTONE_ACETYLTRANSFERASE_COMPLEX	GO_H4_HISTONE_ACETYLTRANSFERASE_COMPLEX		16	0.470394	1.20255	0.234165	0.484729	1	2372	tags=50%, list=20%, signal=63%
GO_ALPHA_AMINO_ACID_BIOSYNTHETIC_PROCESS	GO_ALPHA_AMINO_ACID_BIOSYNTHETIC_PROCESS		56	0.351178	1.20216	0.169847	0.484783	1	2064	tags=30%, list=18%, signal=37%
GO_ANATOMICAL_STRUCTURE_HOMEOSTASIS	GO_ANATOMICAL_STRUCTURE_HOMEOSTASIS		187	0.294629	1.20214	0.0949721	0.483791	1	1261	tags=17%, list=11%, signal=19%
GO_NCRNA_3_END_PROCESSING	GO_NCRNA_3_END_PROCESSING		19	0.460437	1.20205	0.236328	0.482987	1	1900	tags=32%, list=16%, signal=38%
GO_PROTEIN_ACETYLATION	GO_PROTEIN_ACETYLATION		96	0.32307	1.20144	0.150943	0.483618	1	2935	tags=30%, list=25%, signal=40%
GO_HETEROPHILIC_CELL_CELL_ADHESION_VIA_PLASMA_MEMBRANE_CELL_ADHESION_MOLECULES	GO_HETEROPHILIC_CELL_CELL_ADHESION_VIA_PLASMA_MEMBRANE_CELL_ADHESION_MOLECULES		15	0.477419	1.20059	0.229412	0.484694	1	1607	tags=20%, list=14%, signal=23%
GO_SECONDARY_METABOLIC_PROCESS	GO_SECONDARY_METABOLIC_PROCESS		21	0.434489	1.19697	0.213333	0.493094	1	2152	tags=29%, list=19%, signal=35%
GO_PEPTIDASE_ACTIVATOR_ACTIVITY_INVOLVED_IN_APOPTOTIC_PROCESS	GO_PEPTIDASE_ACTIVATOR_ACTIVITY_INVOLVED_IN_APOPTOTIC_PROCESS		17	0.458911	1.19697	0.236994	0.492073	1	2583	tags=35%, list=22%, signal=45%
GO_ACTIN_MEDIATED_CELL_CONTRACTION	GO_ACTIN_MEDIATED_CELL_CONTRACTION		26	0.415516	1.19656	0.203036	0.492105	1	2032	tags=27%, list=18%, signal=33%
GO_SKIN_DEVELOPMENT	GO_SKIN_DEVELOPMENT		78	0.331027	1.19532	0.171963	0.494459	1	1121	tags=12%, list=10%, signal=13%
GO_NADP_METABOLIC_PROCESS	GO_NADP_METABOLIC_PROCESS		21	0.433894	1.19525	0.214421	0.493618	1	2319	tags=43%, list=20%, signal=53%
GO_REGULATION_OF_RNA_SPLICING	GO_REGULATION_OF_RNA_SPLICING		75	0.33514	1.19505	0.161959	0.493134	1	3142	tags=41%, list=27%, signal=56%
GO_CELLULAR_MODIFIED_AMINO_ACID_BIOSYNTHETIC_PROCESS	GO_CELLULAR_MODIFIED_AMINO_ACID_BIOSYNTHETIC_PROCESS		38	0.379043	1.19503	0.20381	0.492177	1	2114	tags=26%, list=18%, signal=32%
GO_CARDIAC_VENTRICLE_MORPHOGENESIS	GO_CARDIAC_VENTRICLE_MORPHOGENESIS		24	0.422443	1.19485	0.222868	0.49161	1	1228	tags=29%, list=11%, signal=33%
GO_MITOCHONDRION_ORGANIZATION	GO_MITOCHONDRION_ORGANIZATION		466	0.26813	1.19371	0.05	0.493486	1	2373	tags=25%, list=20%, signal=30%
GO_ATPASE_ACTIVITY	GO_ATPASE_ACTIVITY		315	0.277211	1.19221	0.0733945	0.496445	1	2054	tags=27%, list=18%, signal=32%
GO_OXIDOREDUCTASE_ACTIVITY_ACTING_ON_THE_ALDEHYDE_OR_OXO_GROUP_OF_DONORS	GO_OXIDOREDUCTASE_ACTIVITY_ACTING_ON_THE_ALDEHYDE_OR_OXO_GROUP_OF_DONORS		28	0.406182	1.19016	0.204771	0.5009	1	1926	tags=36%, list=17%, signal=43%
GO_AUTOPHAGY	GO_AUTOPHAGY		296	0.275844	1.19004	0.0814815	0.500175	1	2052	tags=19%, list=18%, signal=22%
GO_PLATELET_DERIVED_GROWTH_FACTOR_RECEPTOR_SIGNALING_PATHWAY	GO_PLATELET_DERIVED_GROWTH_FACTOR_RECEPTOR_SIGNALING_PATHWAY		27	0.409425	1.18997	0.217304	0.499318	1	0	tags=4%, list=0%, signal=4%
GO_DNA_LIGATION	GO_DNA_LIGATION		16	0.464593	1.18901	0.237383	0.500807	1	2341	tags=50%, list=20%, signal=63%
GO_MONOCARBOXYLIC_ACID_TRANSMEMBRANE_TRANSPORTER_ACTIVITY	GO_MONOCARBOXYLIC_ACID_TRANSMEMBRANE_TRANSPORTER_ACTIVITY		18	0.44483	1.18682	0.251429	0.50577	1	2189	tags=33%, list=19%, signal=41%
GO_NITROGEN_COMPOUND_TRANSPORT	GO_NITROGEN_COMPOUND_TRANSPORT		306	0.275011	1.18622	0.0607143	0.50632	1	1757	tags=19%, list=15%, signal=22%
GO_REGENERATION	GO_REGENERATION		94	0.317048	1.18608	0.173228	0.505675	1	1703	tags=24%, list=15%, signal=28%
GO_WATER_SOLUBLE_VITAMIN_METABOLIC_PROCESS	GO_WATER_SOLUBLE_VITAMIN_METABOLIC_PROCESS		54	0.351067	1.18554	0.191882	0.506086	1	1395	tags=19%, list=12%, signal=21%
GO_NUCLEOSIDE_BISPHOSPHATE_METABOLIC_PROCESS	GO_NUCLEOSIDE_BISPHOSPHATE_METABOLIC_PROCESS		26	0.413758	1.18532	0.244186	0.505607	1	1020	tags=15%, list=9%, signal=17%
GO_NEGATIVE_REGULATION_OF_SMALL_GTPASE_MEDIATED_SIGNAL_TRANSDUCTION	GO_NEGATIVE_REGULATION_OF_SMALL_GTPASE_MEDIATED_SIGNAL_TRANSDUCTION		23	0.422312	1.18462	0.231827	0.506389	1	476	tags=13%, list=4%, signal=14%
GO_ENDOCARDIAL_CUSHION_DEVELOPMENT	GO_ENDOCARDIAL_CUSHION_DEVELOPMENT		15	0.465176	1.18391	0.253937	0.507253	1	790	tags=27%, list=7%, signal=29%
GO_PHOSPHATASE_REGULATOR_ACTIVITY	GO_PHOSPHATASE_REGULATOR_ACTIVITY		59	0.346635	1.18345	0.200393	0.507463	1	2477	tags=27%, list=21%, signal=34%
GO_RESPONSE_TO_COCAINE	GO_RESPONSE_TO_COCAINE		22	0.426305	1.18156	0.238004	0.511468	1	2101	tags=27%, list=18%, signal=33%
GO_PURINE_CONTAINING_COMPOUND_BIOSYNTHETIC_PROCESS	GO_PURINE_CONTAINING_COMPOUND_BIOSYNTHETIC_PROCESS		99	0.319639	1.18033	0.16047	0.513746	1	2436	tags=29%, list=21%, signal=37%
GO_PURINE_NUCLEOSIDE_MONOPHOSPHATE_BIOSYNTHETIC_PROCESS	GO_PURINE_NUCLEOSIDE_MONOPHOSPHATE_BIOSYNTHETIC_PROCESS		49	0.356202	1.17947	0.193294	0.51493	1	2436	tags=39%, list=21%, signal=49%
GO_NUCLEAR_SPECK	GO_NUCLEAR_SPECK		164	0.296201	1.17911	0.130435	0.514921	1	2845	tags=33%, list=25%, signal=43%
GO_POSITIVE_REGULATION_OF_CELL_CYCLE	GO_POSITIVE_REGULATION_OF_CELL_CYCLE		231	0.2783	1.17902	0.0877863	0.514129	1	2253	tags=26%, list=19%, signal=32%
GO_OXIDOREDUCTASE_ACTIVITY_ACTING_ON_NAD_P_H_QUINONE_OR_SIMILAR_COMPOUND_AS_ACCEPTOR	GO_OXIDOREDUCTASE_ACTIVITY_ACTING_ON_NAD_P_H_QUINONE_OR_SIMILAR_COMPOUND_AS_ACCEPTOR		44	0.362225	1.17896	0.224231	0.513251	1	2211	tags=27%, list=19%, signal=34%
GO_MODULATION_BY_SYMBIONT_OF_HOST_CELLULAR_PROCESS	GO_MODULATION_BY_SYMBIONT_OF_HOST_CELLULAR_PROCESS		22	0.421575	1.17815	0.250457	0.514327	1	3221	tags=41%, list=28%, signal=57%
GO_EPIDERMIS_DEVELOPMENT	GO_EPIDERMIS_DEVELOPMENT		95	0.315678	1.17794	0.174863	0.513929	1	1121	tags=14%, list=10%, signal=15%
GO_ORGANIC_ACID_CATABOLIC_PROCESS	GO_ORGANIC_ACID_CATABOLIC_PROCESS		139	0.302077	1.17691	0.155722	0.515635	1	1425	tags=17%, list=12%, signal=19%
GO_PYRIMIDINE_RIBONUCLEOSIDE_METABOLIC_PROCESS	GO_PYRIMIDINE_RIBONUCLEOSIDE_METABOLIC_PROCESS		23	0.418499	1.17647	0.245614	0.515749	1	2647	tags=43%, list=23%, signal=56%
GO_NEGATIVE_REGULATION_OF_PROTEIN_MODIFICATION_BY_SMALL_PROTEIN_CONJUGATION_OR_REMOVAL	GO_NEGATIVE_REGULATION_OF_PROTEIN_MODIFICATION_BY_SMALL_PROTEIN_CONJUGATION_OR_REMOVAL		123	0.306067	1.17628	0.149533	0.515175	1	2518	tags=32%, list=22%, signal=40%
GO_RNA_CAPPING	GO_RNA_CAPPING		34	0.378542	1.17521	0.232902	0.517049	1	1545	tags=26%, list=13%, signal=30%
GO_VITAMIN_METABOLIC_PROCESS	GO_VITAMIN_METABOLIC_PROCESS		67	0.337281	1.17342	0.202627	0.520928	1	1395	tags=18%, list=12%, signal=20%
GO_ORGANIC_ACID_BINDING	GO_ORGANIC_ACID_BINDING		103	0.310512	1.17304	0.185958	0.520885	1	601	tags=11%, list=5%, signal=11%
GO_DIENCEPHALON_DEVELOPMENT	GO_DIENCEPHALON_DEVELOPMENT		27	0.405495	1.17303	0.239544	0.519912	1	938	tags=26%, list=8%, signal=28%
GO_VESICLE_MEDIATED_TRANSPORT_BETWEEN_ENDOSOMAL_COMPARTMENTS	GO_VESICLE_MEDIATED_TRANSPORT_BETWEEN_ENDOSOMAL_COMPARTMENTS		18	0.443478	1.17191	0.245283	0.522004	1	1877	tags=22%, list=16%, signal=26%
GO_RNA_PHOSPHODIESTER_BOND_HYDROLYSIS_EXONUCLEOLYTIC	GO_RNA_PHOSPHODIESTER_BOND_HYDROLYSIS_EXONUCLEOLYTIC		33	0.38435	1.17081	0.226054	0.524039	1	3228	tags=42%, list=28%, signal=59%
GO_GLUCOSE_6_PHOSPHATE_METABOLIC_PROCESS	GO_GLUCOSE_6_PHOSPHATE_METABOLIC_PROCESS		16	0.454833	1.16975	0.275	0.52577	1	589	tags=25%, list=5%, signal=26%
GO_REGULATION_OF_ACTIN_NUCLEATION	GO_REGULATION_OF_ACTIN_NUCLEATION		19	0.445479	1.16973	0.269231	0.524841	1	2281	tags=37%, list=20%, signal=46%
GO_ALPHA_AMINO_ACID_CATABOLIC_PROCESS	GO_ALPHA_AMINO_ACID_CATABOLIC_PROCESS		55	0.345438	1.16886	0.195695	0.526161	1	1425	tags=18%, list=12%, signal=21%
GO_REGULATION_OF_MRNA_METABOLIC_PROCESS	GO_REGULATION_OF_MRNA_METABOLIC_PROCESS		95	0.317891	1.16855	0.165306	0.525924	1	3064	tags=44%, list=26%, signal=60%
GO_PIGMENT_GRANULE	GO_PIGMENT_GRANULE		85	0.318078	1.16849	0.202652	0.525077	1	1602	tags=21%, list=14%, signal=24%
GO_RESPONSE_TO_ARSENIC_CONTAINING_SUBSTANCE	GO_RESPONSE_TO_ARSENIC_CONTAINING_SUBSTANCE		26	0.406358	1.1683	0.261297	0.524547	1	3506	tags=54%, list=30%, signal=77%
GO_MACROMOLECULE_METHYLATION	GO_MACROMOLECULE_METHYLATION		137	0.296517	1.16812	0.144788	0.524023	1	2977	tags=36%, list=26%, signal=48%
GO_SMALL_MOLECULE_CATABOLIC_PROCESS	GO_SMALL_MOLECULE_CATABOLIC_PROCESS		219	0.28055	1.16793	0.14781	0.523501	1	1527	tags=17%, list=13%, signal=19%
GO_REGULATION_OF_AMINE_TRANSPORT	GO_REGULATION_OF_AMINE_TRANSPORT		27	0.400058	1.16638	0.231068	0.526824	1	3910	tags=44%, list=34%, signal=67%
GO_PIGMENT_BIOSYNTHETIC_PROCESS	GO_PIGMENT_BIOSYNTHETIC_PROCESS		37	0.379384	1.16553	0.236059	0.528136	1	2814	tags=46%, list=24%, signal=61%
GO_DNA_DIRECTED_DNA_POLYMERASE_ACTIVITY	GO_DNA_DIRECTED_DNA_POLYMERASE_ACTIVITY		22	0.427864	1.16541	0.252319	0.527444	1	944	tags=23%, list=8%, signal=25%
GO_STEM_CELL_PROLIFERATION	GO_STEM_CELL_PROLIFERATION		26	0.401282	1.16355	0.244576	0.531346	1	2654	tags=31%, list=23%, signal=40%
GO_MAINTENANCE_OF_CELL_NUMBER	GO_MAINTENANCE_OF_CELL_NUMBER		93	0.309538	1.16274	0.191729	0.532448	1	2024	tags=25%, list=17%, signal=30%
GO_NUCLEAR_TRANSCRIBED_MRNA_CATABOLIC_PROCESS_NONSENSE_MEDIATED_DECAY	GO_NUCLEAR_TRANSCRIBED_MRNA_CATABOLIC_PROCESS_NONSENSE_MEDIATED_DECAY		114	0.303962	1.16242	0.188213	0.532376	1	3400	tags=39%, list=29%, signal=55%
GO_THIOLESTER_HYDROLASE_ACTIVITY	GO_THIOLESTER_HYDROLASE_ACTIVITY		23	0.415133	1.16168	0.256461	0.53339	1	1574	tags=26%, list=14%, signal=30%
GO_HISTONE_H3_ACETYLATION	GO_HISTONE_H3_ACETYLATION		35	0.382356	1.16149	0.229126	0.532865	1	3465	tags=46%, list=30%, signal=65%
GO_A_BAND	GO_A_BAND		17	0.446424	1.16095	0.26378	0.53338	1	1219	tags=18%, list=11%, signal=20%
GO_S_ADENOSYLMETHIONINE_DEPENDENT_METHYLTRANSFERASE_ACTIVITY	GO_S_ADENOSYLMETHIONINE_DEPENDENT_METHYLTRANSFERASE_ACTIVITY		96	0.314143	1.16069	0.2	0.533069	1	2827	tags=36%, list=24%, signal=48%
GO_PROTEIN_HOMOOLIGOMERIZATION	GO_PROTEIN_HOMOOLIGOMERIZATION		155	0.292482	1.16039	0.154135	0.532872	1	1747	tags=20%, list=15%, signal=23%
GO_REGULATION_OF_CELLULAR_RESPONSE_TO_HEAT	GO_REGULATION_OF_CELLULAR_RESPONSE_TO_HEAT		63	0.332782	1.16005	0.215238	0.532775	1	2962	tags=32%, list=26%, signal=42%
GO_SNRNA_METABOLIC_PROCESS	GO_SNRNA_METABOLIC_PROCESS		74	0.324543	1.15982	0.194444	0.53239	1	1738	tags=22%, list=15%, signal=25%
GO_TRNA_MODIFICATION	GO_TRNA_MODIFICATION		50	0.350703	1.15878	0.218692	0.534166	1	1793	tags=26%, list=15%, signal=31%
GO_TRNA_METHYLATION	GO_TRNA_METHYLATION		19	0.431389	1.15568	0.278846	0.541715	1	3045	tags=42%, list=26%, signal=57%
GO_NUCLEOSOME_BINDING	GO_NUCLEOSOME_BINDING		42	0.351453	1.15508	0.225564	0.542391	1	2308	tags=36%, list=20%, signal=44%
GO_RNA_POLYADENYLATION	GO_RNA_POLYADENYLATION		26	0.404192	1.15325	0.272727	0.546279	1	2106	tags=31%, list=18%, signal=38%
GO_CYSTEINE_TYPE_ENDOPEPTIDASE_REGULATOR_ACTIVITY_INVOLVED_IN_APOPTOTIC_PROCESS	GO_CYSTEINE_TYPE_ENDOPEPTIDASE_REGULATOR_ACTIVITY_INVOLVED_IN_APOPTOTIC_PROCESS		31	0.385739	1.15163	0.233397	0.549783	1	1725	tags=29%, list=15%, signal=34%
GO_ALPHA_AMINO_ACID_METABOLIC_PROCESS	GO_ALPHA_AMINO_ACID_METABOLIC_PROCESS		144	0.291009	1.15083	0.171698	0.550899	1	2064	tags=24%, list=18%, signal=28%
GO_IRON_ION_BINDING	GO_IRON_ION_BINDING		66	0.328277	1.15012	0.22619	0.551774	1	568	tags=12%, list=5%, signal=13%
GO_GMP_METABOLIC_PROCESS	GO_GMP_METABOLIC_PROCESS		15	0.458352	1.14988	0.290614	0.551438	1	1630	tags=40%, list=14%, signal=46%
GO_INTERSTRAND_CROSS_LINK_REPAIR	GO_INTERSTRAND_CROSS_LINK_REPAIR		33	0.379592	1.14777	0.266541	0.556335	1	3096	tags=39%, list=27%, signal=54%
GO_POSITIVE_REGULATION_OF_CHROMOSOME_ORGANIZATION	GO_POSITIVE_REGULATION_OF_CHROMOSOME_ORGANIZATION		123	0.29608	1.14765	0.220114	0.555609	1	2234	tags=28%, list=19%, signal=35%
GO_COLUMNAR_CUBOIDAL_EPITHELIAL_CELL_DIFFERENTIATION	GO_COLUMNAR_CUBOIDAL_EPITHELIAL_CELL_DIFFERENTIATION		56	0.341836	1.14716	0.227273	0.555975	1	1805	tags=25%, list=16%, signal=29%
GO_POSITIVE_REGULATION_OF_CELL_DIVISION	GO_POSITIVE_REGULATION_OF_CELL_DIVISION		70	0.326405	1.1469	0.233397	0.555651	1	905	tags=17%, list=8%, signal=18%
GO_REGULATION_OF_PROTEIN_BINDING	GO_REGULATION_OF_PROTEIN_BINDING		117	0.299419	1.14675	0.181467	0.555097	1	2188	tags=26%, list=19%, signal=31%
GO_MICROTUBULE_ORGANIZING_CENTER_PART	GO_MICROTUBULE_ORGANIZING_CENTER_PART		109	0.304875	1.14592	0.197368	0.556344	1	2574	tags=33%, list=22%, signal=42%
GO_AUDITORY_RECEPTOR_CELL_DIFFERENTIATION	GO_AUDITORY_RECEPTOR_CELL_DIFFERENTIATION		16	0.447357	1.14506	0.291985	0.557766	1	790	tags=25%, list=7%, signal=27%
GO_CENTRIOLE_ASSEMBLY	GO_CENTRIOLE_ASSEMBLY		16	0.454456	1.14424	0.283203	0.559002	1	4214	tags=56%, list=36%, signal=88%
GO_SNORNA_BINDING	GO_SNORNA_BINDING		24	0.402408	1.14362	0.255361	0.559689	1	3058	tags=38%, list=26%, signal=51%
GO_POSITIVE_REGULATION_OF_MITOTIC_NUCLEAR_DIVISION	GO_POSITIVE_REGULATION_OF_MITOTIC_NUCLEAR_DIVISION		30	0.388161	1.14043	0.261036	0.567684	1	905	tags=23%, list=8%, signal=25%
GO_SAGA_TYPE_COMPLEX	GO_SAGA_TYPE_COMPLEX		27	0.390361	1.13989	0.269841	0.568231	1	4035	tags=52%, list=35%, signal=79%
GO_PREASSEMBLY_OF_GPI_ANCHOR_IN_ER_MEMBRANE	GO_PREASSEMBLY_OF_GPI_ANCHOR_IN_ER_MEMBRANE		15	0.449616	1.13979	0.287072	0.567504	1	11	tags=7%, list=0%, signal=7%
GO_MODIFICATION_BY_SYMBIONT_OF_HOST_MORPHOLOGY_OR_PHYSIOLOGY	GO_MODIFICATION_BY_SYMBIONT_OF_HOST_MORPHOLOGY_OR_PHYSIOLOGY		33	0.375151	1.1395	0.268102	0.567306	1	2869	tags=36%, list=25%, signal=48%
GO_REGULATION_OF_SKELETAL_MUSCLE_TISSUE_DEVELOPMENT	GO_REGULATION_OF_SKELETAL_MUSCLE_TISSUE_DEVELOPMENT		22	0.40586	1.13896	0.265469	0.56784	1	816	tags=14%, list=7%, signal=15%
GO_REGULATION_OF_TELOMERASE_ACTIVITY	GO_REGULATION_OF_TELOMERASE_ACTIVITY		35	0.369168	1.13564	0.265625	0.576305	1	1316	tags=31%, list=11%, signal=35%
GO_GDP_BINDING	GO_GDP_BINDING		38	0.367928	1.13509	0.256167	0.576855	1	1217	tags=18%, list=11%, signal=21%
GO_PROTEIN_ACYLATION	GO_PROTEIN_ACYLATION		121	0.297283	1.13481	0.195817	0.576653	1	2935	tags=29%, list=25%, signal=38%
GO_CELLULAR_SENESCENCE	GO_CELLULAR_SENESCENCE		24	0.400965	1.13367	0.291115	0.578774	1	3085	tags=38%, list=27%, signal=51%
GO_NEGATIVE_REGULATION_OF_MRNA_METABOLIC_PROCESS	GO_NEGATIVE_REGULATION_OF_MRNA_METABOLIC_PROCESS		32	0.383968	1.13347	0.295367	0.578308	1	3796	tags=63%, list=33%, signal=93%
GO_B_CELL_ACTIVATION_INVOLVED_IN_IMMUNE_RESPONSE	GO_B_CELL_ACTIVATION_INVOLVED_IN_IMMUNE_RESPONSE		30	0.375478	1.13174	0.279528	0.582297	1	879	tags=20%, list=8%, signal=22%
GO_SPINDLE_MICROTUBULE	GO_SPINDLE_MICROTUBULE		47	0.349435	1.13131	0.273256	0.582481	1	2653	tags=32%, list=23%, signal=41%
GO_POSITIVE_REGULATION_OF_MUSCLE_TISSUE_DEVELOPMENT	GO_POSITIVE_REGULATION_OF_MUSCLE_TISSUE_DEVELOPMENT		27	0.391949	1.1305	0.290019	0.583797	1	473	tags=11%, list=4%, signal=12%
GO_SENSORY_PERCEPTION_OF_PAIN	GO_SENSORY_PERCEPTION_OF_PAIN		31	0.3743	1.12942	0.26945	0.585765	1	1693	tags=26%, list=15%, signal=30%
GO_NEGATIVE_REGULATION_OF_CELL_CYCLE_PHASE_TRANSITION	GO_NEGATIVE_REGULATION_OF_CELL_CYCLE_PHASE_TRANSITION		119	0.295843	1.12919	0.217786	0.585412	1	2054	tags=29%, list=18%, signal=35%
GO_POSITIVE_REGULATION_OF_NUCLEAR_DIVISION	GO_POSITIVE_REGULATION_OF_NUCLEAR_DIVISION		33	0.378018	1.12737	0.300589	0.589636	1	905	tags=21%, list=8%, signal=23%
GO_CELLULAR_RESPONSE_TO_UV	GO_CELLULAR_RESPONSE_TO_UV		52	0.339323	1.12698	0.26259	0.589706	1	2285	tags=33%, list=20%, signal=41%
GO_SMALL_MOLECULE_BIOSYNTHETIC_PROCESS	GO_SMALL_MOLECULE_BIOSYNTHETIC_PROCESS		281	0.263098	1.12646	0.158965	0.590205	1	1439	tags=17%, list=12%, signal=19%
GO_PROTEIN_DEACETYLASE_ACTIVITY	GO_PROTEIN_DEACETYLASE_ACTIVITY		38	0.359989	1.12551	0.273723	0.59188	1	1256	tags=16%, list=11%, signal=18%
GO_ENDONUCLEASE_ACTIVITY	GO_ENDONUCLEASE_ACTIVITY		97	0.304821	1.12544	0.221172	0.591066	1	2414	tags=30%, list=21%, signal=37%
GO_ALPHA_TUBULIN_BINDING	GO_ALPHA_TUBULIN_BINDING		16	0.436377	1.12473	0.321012	0.592167	1	1877	tags=44%, list=16%, signal=52%
GO_CELLULAR_AMINO_ACID_METABOLIC_PROCESS	GO_CELLULAR_AMINO_ACID_METABOLIC_PROCESS		227	0.270079	1.12471	0.164032	0.591202	1	2064	tags=21%, list=18%, signal=25%
GO_LAMELLIPODIUM_ORGANIZATION	GO_LAMELLIPODIUM_ORGANIZATION		28	0.384581	1.12362	0.294118	0.593221	1	346	tags=11%, list=3%, signal=11%
GO_REGULATION_OF_PROTEIN_ACETYLATION	GO_REGULATION_OF_PROTEIN_ACETYLATION		45	0.34704	1.12261	0.28	0.595139	1	2704	tags=38%, list=23%, signal=49%
GO_ESTABLISHMENT_OF_PROTEIN_LOCALIZATION_TO_ORGANELLE	GO_ESTABLISHMENT_OF_PROTEIN_LOCALIZATION_TO_ORGANELLE		307	0.259938	1.12209	0.158672	0.595522	1	2144	tags=20%, list=19%, signal=24%
GO_PROTEIN_LOCALIZATION_TO_NUCLEUS	GO_PROTEIN_LOCALIZATION_TO_NUCLEUS		118	0.28853	1.12203	0.243902	0.594646	1	543	tags=8%, list=5%, signal=9%
GO_ELECTRON_TRANSPORT_CHAIN	GO_ELECTRON_TRANSPORT_CHAIN		82	0.311328	1.12169	0.243513	0.594571	1	2287	tags=24%, list=20%, signal=30%
GO_SITE_OF_DOUBLE_STRAND_BREAK	GO_SITE_OF_DOUBLE_STRAND_BREAK		25	0.396324	1.11879	0.294991	0.60177	1	2893	tags=32%, list=25%, signal=43%
GO_DYNEIN_BINDING	GO_DYNEIN_BINDING		16	0.442258	1.1187	0.317829	0.601021	1	2762	tags=31%, list=24%, signal=41%
GO_METHIONINE_METABOLIC_PROCESS	GO_METHIONINE_METABOLIC_PROCESS		15	0.449727	1.11859	0.331224	0.600288	1	3306	tags=47%, list=29%, signal=65%
GO_MALE_GAMETE_GENERATION	GO_MALE_GAMETE_GENERATION		231	0.268225	1.11707	0.206107	0.603754	1	2281	tags=25%, list=20%, signal=31%
GO_EXOPEPTIDASE_ACTIVITY	GO_EXOPEPTIDASE_ACTIVITY		55	0.33322	1.11655	0.26975	0.60426	1	1534	tags=18%, list=13%, signal=21%
GO_NUCLEOTIDYLTRANSFERASE_ACTIVITY	GO_NUCLEOTIDYLTRANSFERASE_ACTIVITY		111	0.295628	1.11575	0.238748	0.605572	1	1458	tags=21%, list=13%, signal=23%
GO_CELLULAR_RESPONSE_TO_LIGHT_STIMULUS	GO_CELLULAR_RESPONSE_TO_LIGHT_STIMULUS		61	0.322816	1.11562	0.265385	0.604897	1	2331	tags=33%, list=20%, signal=41%
GO_NEGATIVE_REGULATION_OF_VASCULATURE_DEVELOPMENT	GO_NEGATIVE_REGULATION_OF_VASCULATURE_DEVELOPMENT		34	0.36715	1.11544	0.296786	0.604403	1	3262	tags=44%, list=28%, signal=61%
GO_ACTOMYOSIN	GO_ACTOMYOSIN		42	0.350696	1.11408	0.270588	0.607417	1	2065	tags=24%, list=18%, signal=29%
GO_HOMOPHILIC_CELL_ADHESION_VIA_PLASMA_MEMBRANE_ADHESION_MOLECULES	GO_HOMOPHILIC_CELL_ADHESION_VIA_PLASMA_MEMBRANE_ADHESION_MOLECULES		30	0.3796	1.11381	0.302734	0.607213	1	1623	tags=30%, list=14%, signal=35%
GO_CHROMOSOME_ORGANIZATION_INVOLVED_IN_MEIOTIC_CELL_CYCLE	GO_CHROMOSOME_ORGANIZATION_INVOLVED_IN_MEIOTIC_CELL_CYCLE		26	0.385579	1.11291	0.298805	0.608761	1	2846	tags=50%, list=25%, signal=66%
GO_ANDROGEN_RECEPTOR_BINDING	GO_ANDROGEN_RECEPTOR_BINDING		35	0.356928	1.11242	0.306452	0.609183	1	1948	tags=29%, list=17%, signal=34%
GO_REGULATION_OF_RESPONSE_TO_DNA_DAMAGE_STIMULUS	GO_REGULATION_OF_RESPONSE_TO_DNA_DAMAGE_STIMULUS		116	0.292201	1.11114	0.230483	0.612026	1	2354	tags=29%, list=20%, signal=36%
GO_UBIQUITIN_LIKE_PROTEIN_LIGASE_BINDING	GO_UBIQUITIN_LIKE_PROTEIN_LIGASE_BINDING		219	0.266863	1.11103	0.196364	0.611308	1	1914	tags=21%, list=17%, signal=25%
GO_SOMATIC_DIVERSIFICATION_OF_IMMUNE_RECEPTORS	GO_SOMATIC_DIVERSIFICATION_OF_IMMUNE_RECEPTORS		36	0.358979	1.11086	0.26465	0.610833	1	2306	tags=33%, list=20%, signal=41%
GO_GUANOSINE_CONTAINING_COMPOUND_METABOLIC_PROCESS	GO_GUANOSINE_CONTAINING_COMPOUND_METABOLIC_PROCESS		35	0.363146	1.10997	0.302913	0.612377	1	2647	tags=34%, list=23%, signal=44%
GO_GLYCOSYL_COMPOUND_METABOLIC_PROCESS	GO_GLYCOSYL_COMPOUND_METABOLIC_PROCESS		274	0.260577	1.10945	0.187845	0.612835	1	2345	tags=25%, list=20%, signal=31%
GO_U1_SNRNP	GO_U1_SNRNP		15	0.437525	1.10916	0.329457	0.612643	1	1432	tags=33%, list=12%, signal=38%
GO_NUCLEAR_TRANSPORT	GO_NUCLEAR_TRANSPORT		286	0.258417	1.10647	0.189435	0.619446	1	2031	tags=19%, list=18%, signal=23%
GO_NEGATIVE_REGULATION_OF_CELLULAR_COMPONENT_ORGANIZATION	GO_NEGATIVE_REGULATION_OF_CELLULAR_COMPONENT_ORGANIZATION		463	0.247412	1.10611	0.162749	0.619526	1	2256	tags=26%, list=19%, signal=31%
GO_ORGANIC_CYCLIC_COMPOUND_CATABOLIC_PROCESS	GO_ORGANIC_CYCLIC_COMPOUND_CATABOLIC_PROCESS		324	0.256543	1.10477	0.189781	0.622448	1	2425	tags=27%, list=21%, signal=33%
GO_MONOSACCHARIDE_CATABOLIC_PROCESS	GO_MONOSACCHARIDE_CATABOLIC_PROCESS		41	0.350588	1.10468	0.305343	0.621707	1	1675	tags=27%, list=14%, signal=31%
GO_INTRACELLULAR_STEROID_HORMONE_RECEPTOR_SIGNALING_PATHWAY	GO_INTRACELLULAR_STEROID_HORMONE_RECEPTOR_SIGNALING_PATHWAY		56	0.325365	1.10422	0.276557	0.621986	1	2157	tags=25%, list=19%, signal=31%
GO_RESPONSE_TO_LITHIUM_ION	GO_RESPONSE_TO_LITHIUM_ION		16	0.42927	1.10322	0.335238	0.623879	1	701	tags=25%, list=6%, signal=27%
GO_POSITIVE_REGULATION_OF_MULTI_ORGANISM_PROCESS	GO_POSITIVE_REGULATION_OF_MULTI_ORGANISM_PROCESS		116	0.287936	1.10262	0.238447	0.62459	1	1336	tags=19%, list=12%, signal=21%
GO_CILIUM	GO_CILIUM		234	0.262042	1.10163	0.205505	0.626498	1	2840	tags=26%, list=25%, signal=34%
GO_ISOTYPE_SWITCHING	GO_ISOTYPE_SWITCHING		15	0.437752	1.10093	0.348315	0.627508	1	879	tags=27%, list=8%, signal=29%
GO_NUCLEOTIDE_EXCISION_REPAIR_DNA_DUPLEX_UNWINDING	GO_NUCLEOTIDE_EXCISION_REPAIR_DNA_DUPLEX_UNWINDING		22	0.396663	1.1007	0.314066	0.627161	1	2577	tags=45%, list=22%, signal=58%
GO_SPERM_PART	GO_SPERM_PART		63	0.318507	1.10009	0.291667	0.627988	1	1458	tags=19%, list=13%, signal=22%
GO_TRANSCRIPTION_FROM_RNA_POLYMERASE_I_PROMOTER	GO_TRANSCRIPTION_FROM_RNA_POLYMERASE_I_PROMOTER		34	0.359563	1.09991	0.301344	0.627464	1	2741	tags=41%, list=24%, signal=54%
GO_MOTOR_ACTIVITY	GO_MOTOR_ACTIVITY		73	0.312437	1.09928	0.266925	0.628246	1	1971	tags=27%, list=17%, signal=33%
GO_PROTEIN_PHOSPHORYLATED_AMINO_ACID_BINDING	GO_PROTEIN_PHOSPHORYLATED_AMINO_ACID_BINDING		21	0.405459	1.09886	0.321569	0.628443	1	611	tags=19%, list=5%, signal=20%
GO_PHOSPHATIDYLINOSITOL_3_4_BISPHOSPHATE_BINDING	GO_PHOSPHATIDYLINOSITOL_3_4_BISPHOSPHATE_BINDING		15	0.43922	1.09745	0.345924	0.631637	1	4	tags=7%, list=0%, signal=7%
GO_CULLIN_RING_UBIQUITIN_LIGASE_COMPLEX	GO_CULLIN_RING_UBIQUITIN_LIGASE_COMPLEX		107	0.289555	1.09605	0.259766	0.634883	1	3534	tags=40%, list=31%, signal=57%
GO_ATPASE_ACTIVITY_COUPLED	GO_ATPASE_ACTIVITY_COUPLED		243	0.258497	1.09443	0.224568	0.638729	1	2054	tags=26%, list=18%, signal=31%
GO_SPERMATID_DIFFERENTIATION	GO_SPERMATID_DIFFERENTIATION		61	0.318348	1.0924	0.316479	0.643822	1	1379	tags=20%, list=12%, signal=22%
GO_RIBONUCLEOSIDE_TRIPHOSPHATE_BIOSYNTHETIC_PROCESS	GO_RIBONUCLEOSIDE_TRIPHOSPHATE_BIOSYNTHETIC_PROCESS		38	0.347265	1.09159	0.302326	0.645181	1	762	tags=18%, list=7%, signal=20%
GO_MONOCARBOXYLIC_ACID_CATABOLIC_PROCESS	GO_MONOCARBOXYLIC_ACID_CATABOLIC_PROCESS		69	0.310502	1.09145	0.300766	0.644541	1	1083	tags=12%, list=9%, signal=13%
GO_NATURAL_KILLER_CELL_ACTIVATION	GO_NATURAL_KILLER_CELL_ACTIVATION		28	0.375307	1.09123	0.333984	0.644219	1	827	tags=18%, list=7%, signal=19%
GO_NUCLEAR_BODY	GO_NUCLEAR_BODY		287	0.254923	1.09046	0.22043	0.645372	1	2156	tags=24%, list=19%, signal=29%
GO_LENS_DEVELOPMENT_IN_CAMERA_TYPE_EYE	GO_LENS_DEVELOPMENT_IN_CAMERA_TYPE_EYE		30	0.364962	1.08964	0.342593	0.646744	1	2023	tags=27%, list=17%, signal=32%
GO_NUCLEOSIDE_MONOPHOSPHATE_METABOLIC_PROCESS	GO_NUCLEOSIDE_MONOPHOSPHATE_METABOLIC_PROCESS		188	0.267727	1.08937	0.235294	0.646527	1	2436	tags=28%, list=21%, signal=35%
GO_NEGATIVE_REGULATION_OF_CELL_CYCLE	GO_NEGATIVE_REGULATION_OF_CELL_CYCLE		330	0.249961	1.0891	0.209091	0.646336	1	1611	tags=19%, list=14%, signal=22%
GO_PROTEIN_STABILIZATION	GO_PROTEIN_STABILIZATION		99	0.288638	1.0889	0.293333	0.645903	1	1880	tags=25%, list=16%, signal=30%
GO_METALLOPEPTIDASE_ACTIVITY	GO_METALLOPEPTIDASE_ACTIVITY		72	0.30786	1.08776	0.30038	0.648279	1	2823	tags=29%, list=24%, signal=38%
GO_NEURON_PROJECTION_REGENERATION	GO_NEURON_PROJECTION_REGENERATION		18	0.413675	1.08771	0.340681	0.647399	1	1100	tags=22%, list=9%, signal=25%
GO_N_METHYLTRANSFERASE_ACTIVITY	GO_N_METHYLTRANSFERASE_ACTIVITY		57	0.320104	1.08705	0.304189	0.648385	1	2738	tags=39%, list=24%, signal=50%
GO_INORGANIC_ANION_TRANSPORT	GO_INORGANIC_ANION_TRANSPORT		39	0.339323	1.08606	0.329502	0.650303	1	2269	tags=31%, list=20%, signal=38%
GO_MODULATION_BY_VIRUS_OF_HOST_MORPHOLOGY_OR_PHYSIOLOGY	GO_MODULATION_BY_VIRUS_OF_HOST_MORPHOLOGY_OR_PHYSIOLOGY		28	0.367998	1.08507	0.344758	0.652216	1	2869	tags=36%, list=25%, signal=47%
GO_MICROTUBULE_MOTOR_ACTIVITY	GO_MICROTUBULE_MOTOR_ACTIVITY		41	0.340128	1.08425	0.322034	0.65376	1	1830	tags=32%, list=16%, signal=38%
GO_T_CELL_MEDIATED_IMMUNITY	GO_T_CELL_MEDIATED_IMMUNITY		20	0.405199	1.0842	0.343434	0.652903	1	790	tags=20%, list=7%, signal=21%
GO_FEEDING_BEHAVIOR	GO_FEEDING_BEHAVIOR		24	0.384991	1.08371	0.364299	0.653332	1	1073	tags=21%, list=9%, signal=23%
GO_POSITIVE_REGULATION_OF_MITOTIC_CELL_CYCLE	GO_POSITIVE_REGULATION_OF_MITOTIC_CELL_CYCLE		85	0.29939	1.08357	0.294776	0.652741	1	2253	tags=26%, list=19%, signal=32%
GO_NUCLEOTIDE_EXCISION_REPAIR_PREINCISION_COMPLEX_STABILIZATION	GO_NUCLEOTIDE_EXCISION_REPAIR_PREINCISION_COMPLEX_STABILIZATION		20	0.39527	1.0826	0.353398	0.654763	1	3240	tags=50%, list=28%, signal=69%
GO_REGULATION_OF_TRANSCRIPTION_FROM_RNA_POLYMERASE_III_PROMOTER	GO_REGULATION_OF_TRANSCRIPTION_FROM_RNA_POLYMERASE_III_PROMOTER		17	0.423292	1.0815	0.356343	0.656926	1	2631	tags=35%, list=23%, signal=46%
GO_EXOSOME_RNASE_COMPLEX_	GO_EXOSOME_RNASE_COMPLEX_		19	0.402571	1.08139	0.353183	0.656209	1	2991	tags=42%, list=26%, signal=57%
GO_NEGATIVE_REGULATION_OF_BLOOD_PRESSURE	GO_NEGATIVE_REGULATION_OF_BLOOD_PRESSURE		21	0.392193	1.08007	0.353877	0.659263	1	2805	tags=43%, list=24%, signal=56%
GO_MOTILE_CILIUM	GO_MOTILE_CILIUM		52	0.319828	1.07783	0.315498	0.665114	1	2203	tags=29%, list=19%, signal=35%
GO_INTRASPECIES_INTERACTION_BETWEEN_ORGANISMS	GO_INTRASPECIES_INTERACTION_BETWEEN_ORGANISMS		25	0.376911	1.07753	0.343023	0.665056	1	2419	tags=32%, list=21%, signal=40%
GO_KINESIN_COMPLEX	GO_KINESIN_COMPLEX		35	0.354211	1.07669	0.325536	0.666616	1	1786	tags=31%, list=15%, signal=37%
GO_MITOTIC_SPINDLE_ASSEMBLY	GO_MITOTIC_SPINDLE_ASSEMBLY		31	0.362411	1.07262	0.348249	0.678143	1	899	tags=19%, list=8%, signal=21%
GO_SWI_SNF_SUPERFAMILY_TYPE_COMPLEX	GO_SWI_SNF_SUPERFAMILY_TYPE_COMPLEX		60	0.309587	1.07256	0.350844	0.677269	1	2006	tags=28%, list=17%, signal=34%
GO_POSITIVE_REGULATION_OF_ORGAN_GROWTH	GO_POSITIVE_REGULATION_OF_ORGAN_GROWTH		17	0.414735	1.072	0.356299	0.677993	1	938	tags=18%, list=8%, signal=19%
GO_VENTRICULAR_CARDIAC_MUSCLE_TISSUE_DEVELOPMENT	GO_VENTRICULAR_CARDIAC_MUSCLE_TISSUE_DEVELOPMENT		19	0.393475	1.07097	0.338491	0.680165	1	1228	tags=26%, list=11%, signal=29%
GO_NUCLEOID	GO_NUCLEOID		38	0.340765	1.06851	0.327068	0.68678	1	2410	tags=29%, list=21%, signal=36%
GO_PHOSPHATIDYLINOSITOL_4_5_BISPHOSPHATE_BINDING	GO_PHOSPHATIDYLINOSITOL_4_5_BISPHOSPHATE_BINDING		28	0.36199	1.0678	0.344383	0.687944	1	4	tags=4%, list=0%, signal=4%
GO_NEGATIVE_REGULATION_OF_AUTOPHAGY	GO_NEGATIVE_REGULATION_OF_AUTOPHAGY		42	0.330586	1.06768	0.367424	0.687255	1	1366	tags=19%, list=12%, signal=22%
GO_NUCLEOBASE_BIOSYNTHETIC_PROCESS	GO_NUCLEOBASE_BIOSYNTHETIC_PROCESS		18	0.403421	1.06732	0.375	0.687336	1	2793	tags=50%, list=24%, signal=66%
GO_SEXUAL_REPRODUCTION	GO_SEXUAL_REPRODUCTION		344	0.242083	1.06605	0.242685	0.690336	1	1710	tags=19%, list=15%, signal=21%
GO_PRERIBOSOME_LARGE_SUBUNIT_PRECURSOR	GO_PRERIBOSOME_LARGE_SUBUNIT_PRECURSOR		20	0.39057	1.06554	0.382129	0.690839	1	321	tags=10%, list=3%, signal=10%
GO_PIGMENT_METABOLIC_PROCESS	GO_PIGMENT_METABOLIC_PROCESS		41	0.342743	1.06473	0.360396	0.692317	1	2814	tags=41%, list=24%, signal=55%
GO_PIGMENT_CELL_DIFFERENTIATION	GO_PIGMENT_CELL_DIFFERENTIATION		17	0.412376	1.06421	0.372951	0.692882	1	553	tags=12%, list=5%, signal=12%
GO_RNA_POLYMERASE_II_TRANSCRIPTION_COFACTOR_ACTIVITY	GO_RNA_POLYMERASE_II_TRANSCRIPTION_COFACTOR_ACTIVITY		66	0.306273	1.06341	0.344423	0.69433	1	2683	tags=30%, list=23%, signal=39%
GO_REGULATION_OF_VIRAL_TRANSCRIPTION	GO_REGULATION_OF_VIRAL_TRANSCRIPTION		47	0.322489	1.06318	0.331384	0.694021	1	918	tags=21%, list=8%, signal=23%
GO_GAMETE_GENERATION	GO_GAMETE_GENERATION		290	0.24802	1.06246	0.279113	0.695195	1	2281	tags=24%, list=20%, signal=29%
GO_POSITIVE_REGULATION_OF_LIPASE_ACTIVITY	GO_POSITIVE_REGULATION_OF_LIPASE_ACTIVITY		29	0.361731	1.06144	0.352362	0.697272	1	267	tags=10%, list=2%, signal=11%
GO_REGULATION_OF_TRANSLATIONAL_ELONGATION	GO_REGULATION_OF_TRANSLATIONAL_ELONGATION		21	0.391215	1.06042	0.395161	0.699386	1	3814	tags=57%, list=33%, signal=85%
GO_NEGATIVE_REGULATION_OF_RESPONSE_TO_DNA_DAMAGE_STIMULUS	GO_NEGATIVE_REGULATION_OF_RESPONSE_TO_DNA_DAMAGE_STIMULUS		43	0.330288	1.05966	0.371057	0.700694	1	3918	tags=49%, list=34%, signal=74%
GO_PRESYNAPSE	GO_PRESYNAPSE		136	0.268498	1.05899	0.325188	0.701704	1	2124	tags=22%, list=18%, signal=27%
GO_MICROTUBULE_POLYMERIZATION_OR_DEPOLYMERIZATION	GO_MICROTUBULE_POLYMERIZATION_OR_DEPOLYMERIZATION		28	0.359731	1.05863	0.371717	0.701772	1	1502	tags=25%, list=13%, signal=29%
GO_MICROBODY_MEMBRANE	GO_MICROBODY_MEMBRANE		47	0.324673	1.05779	0.354528	0.703368	1	1342	tags=23%, list=12%, signal=26%
GO_NEGATIVE_REGULATION_OF_SIGNAL_TRANSDUCTION_BY_P53_CLASS_MEDIATOR	GO_NEGATIVE_REGULATION_OF_SIGNAL_TRANSDUCTION_BY_P53_CLASS_MEDIATOR		22	0.385516	1.05718	0.367505	0.704176	1	3849	tags=59%, list=33%, signal=88%
GO_ANION_TRANSPORT	GO_ANION_TRANSPORT		233	0.25294	1.05557	0.291139	0.708191	1	1659	tags=19%, list=14%, signal=22%
GO_FEMALE_SEX_DIFFERENTIATION	GO_FEMALE_SEX_DIFFERENTIATION		56	0.315648	1.05555	0.353846	0.707207	1	1240	tags=21%, list=11%, signal=24%
GO_ORGANIC_ACID_BIOSYNTHETIC_PROCESS	GO_ORGANIC_ACID_BIOSYNTHETIC_PROCESS		160	0.261742	1.05486	0.334608	0.708339	1	1747	tags=20%, list=15%, signal=23%
GO_CYTOSKELETAL_PROTEIN_BINDING	GO_CYTOSKELETAL_PROTEIN_BINDING		500	0.236524	1.05336	0.285205	0.711998	1	1892	tags=18%, list=16%, signal=21%
GO_NCRNA_TRANSCRIPTION	GO_NCRNA_TRANSCRIPTION		79	0.294109	1.05213	0.336484	0.714854	1	3112	tags=37%, list=27%, signal=50%
GO_MICROBODY_PART	GO_MICROBODY_PART		70	0.300307	1.05202	0.357815	0.714147	1	1342	tags=20%, list=12%, signal=22%
GO_MONOVALENT_INORGANIC_CATION_TRANSMEMBRANE_TRANSPORTER_ACTIVITY	GO_MONOVALENT_INORGANIC_CATION_TRANSMEMBRANE_TRANSPORTER_ACTIVITY		148	0.264979	1.05028	0.313869	0.71862	1	2300	tags=25%, list=20%, signal=31%
GO_INORGANIC_ANION_TRANSMEMBRANE_TRANSPORTER_ACTIVITY	GO_INORGANIC_ANION_TRANSMEMBRANE_TRANSPORTER_ACTIVITY		38	0.330931	1.04953	0.354331	0.71998	1	2269	tags=29%, list=20%, signal=36%
GO_DNA_DEALKYLATION	GO_DNA_DEALKYLATION		15	0.417044	1.04887	0.397661	0.720998	1	2221	tags=40%, list=19%, signal=49%
GO_CILIUM_MOVEMENT	GO_CILIUM_MOVEMENT		15	0.414991	1.04829	0.392381	0.721776	1	293	tags=13%, list=3%, signal=14%
GO_NEGATIVE_REGULATION_OF_CHROMATIN_MODIFICATION	GO_NEGATIVE_REGULATION_OF_CHROMATIN_MODIFICATION		37	0.341824	1.04803	0.365805	0.721513	1	2195	tags=35%, list=19%, signal=43%
GO_PROTEIN_MONOUBIQUITINATION	GO_PROTEIN_MONOUBIQUITINATION		41	0.330784	1.04757	0.37451	0.721983	1	2799	tags=32%, list=24%, signal=42%
GO_POSITIVE_REGULATION_OF_CYTOKINESIS	GO_POSITIVE_REGULATION_OF_CYTOKINESIS		21	0.384353	1.04754	0.388119	0.721016	1	880	tags=19%, list=8%, signal=21%
GO_NUCLEOTIDE_EXCISION_REPAIR_PREINCISION_COMPLEX_ASSEMBLY	GO_NUCLEOTIDE_EXCISION_REPAIR_PREINCISION_COMPLEX_ASSEMBLY		29	0.361009	1.04689	0.375712	0.722016	1	2893	tags=45%, list=25%, signal=60%
GO_PHOSPHATIDYLINOSITOL_3_4_5_TRISPHOSPHATE_BINDING	GO_PHOSPHATIDYLINOSITOL_3_4_5_TRISPHOSPHATE_BINDING		29	0.356334	1.0466	0.385037	0.7219	1	157	tags=7%, list=1%, signal=7%
GO_NUCLEAR_TRANSCRIPTION_FACTOR_COMPLEX	GO_NUCLEAR_TRANSCRIPTION_FACTOR_COMPLEX		100	0.278547	1.04543	0.356877	0.724631	1	1764	tags=19%, list=15%, signal=22%
GO_TRANSCRIPTION_COACTIVATOR_ACTIVITY	GO_TRANSCRIPTION_COACTIVATOR_ACTIVITY		230	0.248875	1.04483	0.322581	0.725356	1	1495	tags=14%, list=13%, signal=16%
GO_REGULATION_OF_SYNAPTIC_TRANSMISSION_GLUTAMATERGIC	GO_REGULATION_OF_SYNAPTIC_TRANSMISSION_GLUTAMATERGIC		19	0.391965	1.04456	0.394841	0.725246	1	1142	tags=26%, list=10%, signal=29%
GO_HEXOSE_METABOLIC_PROCESS	GO_HEXOSE_METABOLIC_PROCESS		105	0.27417	1.04413	0.356455	0.725578	1	1358	tags=21%, list=12%, signal=24%
GO_EMBRYONIC_CRANIAL_SKELETON_MORPHOGENESIS	GO_EMBRYONIC_CRANIAL_SKELETON_MORPHOGENESIS		22	0.37784	1.04401	0.409867	0.724875	1	4344	tags=45%, list=38%, signal=73%
GO_NUCLEAR_ENVELOPE	GO_NUCLEAR_ENVELOPE		304	0.242794	1.04304	0.327957	0.726805	1	1930	tags=20%, list=17%, signal=23%
GO_MULTI_ORGANISM_LOCALIZATION	GO_MULTI_ORGANISM_LOCALIZATION		61	0.306247	1.04287	0.363964	0.726311	1	1858	tags=25%, list=16%, signal=29%
GO_CYCLIN_DEPENDENT_PROTEIN_KINASE_ACTIVITY	GO_CYCLIN_DEPENDENT_PROTEIN_KINASE_ACTIVITY		27	0.362074	1.04273	0.397032	0.725651	1	2491	tags=33%, list=22%, signal=42%
GO_HISTONE_DEACETYLASE_BINDING	GO_HISTONE_DEACETYLASE_BINDING		83	0.285137	1.03903	0.35249	0.736405	1	1588	tags=20%, list=14%, signal=24%
GO_MAGNESIUM_ION_BINDING	GO_MAGNESIUM_ION_BINDING		143	0.26582	1.03849	0.351145	0.737024	1	1340	tags=15%, list=12%, signal=17%
GO_PEPTIDASE_ACTIVATOR_ACTIVITY	GO_PEPTIDASE_ACTIVATOR_ACTIVITY		30	0.350502	1.03807	0.395349	0.737317	1	1544	tags=20%, list=13%, signal=23%
GO_HYDROLASE_ACTIVITY_ACTING_ON_CARBON_NITROGEN_BUT_NOT_PEPTIDE_BONDS_IN_LINEAR_AMIDES	GO_HYDROLASE_ACTIVITY_ACTING_ON_CARBON_NITROGEN_BUT_NOT_PEPTIDE_BONDS_IN_LINEAR_AMIDES		64	0.299488	1.03804	0.383364	0.736329	1	878	tags=9%, list=8%, signal=10%
GO_RNA_POLYMERASE_II_REPRESSING_TRANSCRIPTION_FACTOR_BINDING	GO_RNA_POLYMERASE_II_REPRESSING_TRANSCRIPTION_FACTOR_BINDING		22	0.381745	1.03761	0.384921	0.736602	1	878	tags=23%, list=8%, signal=25%
GO_GLOBAL_GENOME_NUCLEOTIDE_EXCISION_REPAIR	GO_GLOBAL_GENOME_NUCLEOTIDE_EXCISION_REPAIR		31	0.352033	1.0375	0.408503	0.735889	1	2577	tags=35%, list=22%, signal=46%
GO_SOMITE_DEVELOPMENT	GO_SOMITE_DEVELOPMENT		38	0.33878	1.03738	0.398866	0.735195	1	938	tags=18%, list=8%, signal=20%
GO_OLIGOSACCHARIDE_LIPID_INTERMEDIATE_BIOSYNTHETIC_PROCESS	GO_OLIGOSACCHARIDE_LIPID_INTERMEDIATE_BIOSYNTHETIC_PROCESS		19	0.374562	1.03711	0.391221	0.735032	1	1002	tags=21%, list=9%, signal=23%
GO_G_PROTEIN_COUPLED_RECEPTOR_SIGNALING_PATHWAY_COUPLED_TO_CYCLIC_NUCLEOTIDE_SECOND_MESSENGER	GO_G_PROTEIN_COUPLED_RECEPTOR_SIGNALING_PATHWAY_COUPLED_TO_CYCLIC_NUCLEOTIDE_SECOND_MESSENGER		51	0.311408	1.03699	0.408582	0.734348	1	1142	tags=14%, list=10%, signal=15%
GO_DNA_DOUBLE_STRAND_BREAK_PROCESSING	GO_DNA_DOUBLE_STRAND_BREAK_PROCESSING		19	0.394276	1.03611	0.412668	0.736176	1	2538	tags=37%, list=22%, signal=47%
GO_TRANSCRIPTION_INITIATION_FROM_RNA_POLYMERASE_II_PROMOTER	GO_TRANSCRIPTION_INITIATION_FROM_RNA_POLYMERASE_II_PROMOTER		111	0.270916	1.03604	0.361314	0.735359	1	3198	tags=39%, list=28%, signal=53%
GO_ORGANIC_HYDROXY_COMPOUND_CATABOLIC_PROCESS	GO_ORGANIC_HYDROXY_COMPOUND_CATABOLIC_PROCESS		38	0.325939	1.03485	0.368217	0.738065	1	3204	tags=37%, list=28%, signal=51%
GO_NEGATIVE_REGULATION_OF_CATABOLIC_PROCESS	GO_NEGATIVE_REGULATION_OF_CATABOLIC_PROCESS		145	0.263185	1.0343	0.382066	0.738797	1	3054	tags=32%, list=26%, signal=43%
GO_G1_DNA_DAMAGE_CHECKPOINT	GO_G1_DNA_DAMAGE_CHECKPOINT		61	0.30465	1.0341	0.396768	0.738364	1	2359	tags=31%, list=20%, signal=39%
GO_ENERGY_COUPLED_PROTON_TRANSPORT_DOWN_ELECTROCHEMICAL_GRADIENT	GO_ENERGY_COUPLED_PROTON_TRANSPORT_DOWN_ELECTROCHEMICAL_GRADIENT		20	0.387195	1.03369	0.429412	0.738527	1	762	tags=20%, list=7%, signal=21%
GO_SEGMENTATION	GO_SEGMENTATION		44	0.321716	1.03252	0.409091	0.74121	1	649	tags=16%, list=6%, signal=17%
GO_REGULATION_OF_INTRINSIC_APOPTOTIC_SIGNALING_PATHWAY_BY_P53_CLASS_MEDIATOR	GO_REGULATION_OF_INTRINSIC_APOPTOTIC_SIGNALING_PATHWAY_BY_P53_CLASS_MEDIATOR		19	0.387606	1.03206	0.410305	0.741681	1	3208	tags=47%, list=28%, signal=65%
GO_REGULATION_OF_TRANSLATIONAL_INITIATION	GO_REGULATION_OF_TRANSLATIONAL_INITIATION		72	0.293793	1.03195	0.387033	0.740986	1	3021	tags=39%, list=26%, signal=52%
GO_PHOTORECEPTOR_CONNECTING_CILIUM	GO_PHOTORECEPTOR_CONNECTING_CILIUM		18	0.393049	1.03183	0.385356	0.740325	1	3879	tags=50%, list=34%, signal=75%
GO_PHOTORECEPTOR_CELL_MAINTENANCE	GO_PHOTORECEPTOR_CELL_MAINTENANCE		16	0.408514	1.03079	0.451493	0.742665	1	3525	tags=63%, list=30%, signal=90%
GO_ESTABLISHMENT_OF_PROTEIN_LOCALIZATION_TO_ENDOPLASMIC_RETICULUM	GO_ESTABLISHMENT_OF_PROTEIN_LOCALIZATION_TO_ENDOPLASMIC_RETICULUM		100	0.276881	1.03076	0.381308	0.741692	1	2243	tags=23%, list=19%, signal=28%
GO_RESPONSE_TO_UV	GO_RESPONSE_TO_UV		97	0.276986	1.0296	0.386809	0.744321	1	2285	tags=30%, list=20%, signal=37%
GO_REGULATION_OF_VIRAL_RELEASE_FROM_HOST_CELL	GO_REGULATION_OF_VIRAL_RELEASE_FROM_HOST_CELL		26	0.356465	1.02794	0.407025	0.748396	1	2281	tags=23%, list=20%, signal=29%
GO_REGULATION_OF_POSTSYNAPTIC_MEMBRANE_POTENTIAL	GO_REGULATION_OF_POSTSYNAPTIC_MEMBRANE_POTENTIAL		16	0.39935	1.02695	0.426386	0.750532	1	3118	tags=44%, list=27%, signal=60%
GO_RIBONUCLEOPROTEIN_GRANULE	GO_RIBONUCLEOPROTEIN_GRANULE		112	0.270657	1.02663	0.391969	0.750535	1	3081	tags=34%, list=27%, signal=46%
GO_SECRETORY_GRANULE_MEMBRANE	GO_SECRETORY_GRANULE_MEMBRANE		44	0.315226	1.02654	0.398833	0.74979	1	582	tags=9%, list=5%, signal=10%
GO_RAN_GTPASE_BINDING	GO_RAN_GTPASE_BINDING		28	0.348878	1.02563	0.434363	0.751563	1	423	tags=11%, list=4%, signal=11%
GO_REGULATION_OF_DEFENSE_RESPONSE_TO_VIRUS	GO_REGULATION_OF_DEFENSE_RESPONSE_TO_VIRUS		141	0.260944	1.02395	0.399261	0.75572	1	2399	tags=24%, list=21%, signal=30%
GO_CARDIAC_CHAMBER_DEVELOPMENT	GO_CARDIAC_CHAMBER_DEVELOPMENT		71	0.291033	1.02293	0.40856	0.758019	1	1413	tags=17%, list=12%, signal=19%
GO_FOUR_WAY_JUNCTION_DNA_BINDING	GO_FOUR_WAY_JUNCTION_DNA_BINDING		15	0.401665	1.02228	0.445489	0.7591	1	2159	tags=40%, list=19%, signal=49%
GO_POSITIVE_REGULATION_OF_PROTEIN_MODIFICATION_BY_SMALL_PROTEIN_CONJUGATION_OR_REMOVAL	GO_POSITIVE_REGULATION_OF_PROTEIN_MODIFICATION_BY_SMALL_PROTEIN_CONJUGATION_OR_REMOVAL		163	0.255154	1.02183	0.392381	0.759479	1	2599	tags=28%, list=22%, signal=36%
GO_ALCOHOL_BINDING	GO_ALCOHOL_BINDING		47	0.316205	1.02163	0.435101	0.759091	1	1561	tags=26%, list=13%, signal=29%
GO_NUCLEOSOMAL_DNA_BINDING	GO_NUCLEOSOMAL_DNA_BINDING		28	0.353539	1.02159	0.424861	0.758148	1	1111	tags=25%, list=10%, signal=28%
GO_ANTEROGRADE_AXONAL_TRANSPORT	GO_ANTEROGRADE_AXONAL_TRANSPORT		17	0.394044	1.02037	0.44	0.760927	1	1146	tags=18%, list=10%, signal=20%
GO_NUCLEOSIDE_TRIPHOSPHATE_BIOSYNTHETIC_PROCESS	GO_NUCLEOSIDE_TRIPHOSPHATE_BIOSYNTHETIC_PROCESS		46	0.313348	1.02023	0.433526	0.760305	1	2436	tags=33%, list=21%, signal=41%
GO_PROTEIN_COMPLEX_SCAFFOLD	GO_PROTEIN_COMPLEX_SCAFFOLD		42	0.325567	1.01979	0.435424	0.760685	1	1759	tags=21%, list=15%, signal=25%
GO_NUCLEOBASE_CONTAINING_SMALL_MOLECULE_INTERCONVERSION	GO_NUCLEOBASE_CONTAINING_SMALL_MOLECULE_INTERCONVERSION		17	0.386913	1.01922	0.431002	0.761401	1	2329	tags=35%, list=20%, signal=44%
GO_ESTROGEN_RECEPTOR_BINDING	GO_ESTROGEN_RECEPTOR_BINDING		30	0.341591	1.01912	0.441606	0.760655	1	1633	tags=27%, list=14%, signal=31%
GO_STEREOCILIUM_BUNDLE	GO_STEREOCILIUM_BUNDLE		16	0.395712	1.01905	0.446154	0.759824	1	2809	tags=38%, list=24%, signal=49%
GO_CYSTEINE_TYPE_ENDOPEPTIDASE_INHIBITOR_ACTIVITY_INVOLVED_IN_APOPTOTIC_PROCESS	GO_CYSTEINE_TYPE_ENDOPEPTIDASE_INHIBITOR_ACTIVITY_INVOLVED_IN_APOPTOTIC_PROCESS		17	0.396028	1.01856	0.451681	0.760332	1	1725	tags=35%, list=15%, signal=41%
GO_VIRAL_LIFE_CYCLE	GO_VIRAL_LIFE_CYCLE		240	0.242249	1.01765	0.400362	0.762165	1	2366	tags=24%, list=20%, signal=29%
GO_PROTEIN_TARGETING	GO_PROTEIN_TARGETING		338	0.233803	1.01737	0.3879	0.761986	1	2562	tags=22%, list=22%, signal=28%
GO_RESPONSE_TO_ESTRADIOL	GO_RESPONSE_TO_ESTRADIOL		83	0.28092	1.01608	0.420952	0.76509	1	2101	tags=25%, list=18%, signal=31%
GO_CENTROSOME_DUPLICATION	GO_CENTROSOME_DUPLICATION		27	0.35325	1.01604	0.436647	0.764144	1	4764	tags=63%, list=41%, signal=107%
GO_ORGANIC_ANION_TRANSPORT	GO_ORGANIC_ANION_TRANSPORT		189	0.247302	1.01562	0.418426	0.764421	1	1659	tags=19%, list=14%, signal=21%
GO_PROTEIN_LOCALIZATION_TO_ORGANELLE	GO_PROTEIN_LOCALIZATION_TO_ORGANELLE		446	0.22439	1.01494	0.408127	0.76548	1	3077	tags=29%, list=27%, signal=38%
GO_CYSTEINE_TYPE_ENDOPEPTIDASE_INHIBITOR_ACTIVITY	GO_CYSTEINE_TYPE_ENDOPEPTIDASE_INHIBITOR_ACTIVITY		27	0.349638	1.01487	0.42155	0.764679	1	1725	tags=26%, list=15%, signal=30%
GO_SIGNAL_TRANSDUCTION_BY_P53_CLASS_MEDIATOR	GO_SIGNAL_TRANSDUCTION_BY_P53_CLASS_MEDIATOR		102	0.26865	1.01393	0.395112	0.76663	1	1731	tags=23%, list=15%, signal=26%
GO_PHOSPHATASE_INHIBITOR_ACTIVITY	GO_PHOSPHATASE_INHIBITOR_ACTIVITY		19	0.375485	1.01348	0.46714	0.767033	1	2477	tags=26%, list=21%, signal=33%
GO_RNA_POLYMERASE_II_TRANSCRIPTION_FACTOR_COMPLEX	GO_RNA_POLYMERASE_II_TRANSCRIPTION_FACTOR_COMPLEX		81	0.275332	1.01251	0.415238	0.769064	1	1160	tags=14%, list=10%, signal=15%
GO_HEPATICOBILIARY_SYSTEM_DEVELOPMENT	GO_HEPATICOBILIARY_SYSTEM_DEVELOPMENT		84	0.279447	1.01118	0.420118	0.772211	1	2097	tags=24%, list=18%, signal=29%
GO_NEGATIVE_REGULATION_OF_HISTONE_MODIFICATION	GO_NEGATIVE_REGULATION_OF_HISTONE_MODIFICATION		30	0.337234	1.0108	0.445098	0.772384	1	2195	tags=37%, list=19%, signal=45%
GO_STEROID_HORMONE_RECEPTOR_BINDING	GO_STEROID_HORMONE_RECEPTOR_BINDING		66	0.287842	1.01035	0.427256	0.772831	1	1633	tags=23%, list=14%, signal=26%
GO_PROTEIN_PHOSPHATASE_TYPE_2A_COMPLEX	GO_PROTEIN_PHOSPHATASE_TYPE_2A_COMPLEX		17	0.386516	1.00967	0.422562	0.773913	1	2418	tags=35%, list=21%, signal=45%
GO_REGULATION_OF_CANONICAL_WNT_SIGNALING_PATHWAY	GO_REGULATION_OF_CANONICAL_WNT_SIGNALING_PATHWAY		142	0.254058	1.0093	0.421708	0.774036	1	2335	tags=25%, list=20%, signal=31%
GO_RRNA_BINDING	GO_RRNA_BINDING		55	0.300897	1.00914	0.444444	0.77346	1	2271	tags=27%, list=20%, signal=34%
GO_NEURONAL_STEM_CELL_POPULATION_MAINTENANCE	GO_NEURONAL_STEM_CELL_POPULATION_MAINTENANCE		16	0.395539	1.00837	0.442348	0.774817	1	1675	tags=31%, list=14%, signal=36%
GO_TRANSCRIPTION_FACTOR_ACTIVITY_PROTEIN_BINDING	GO_TRANSCRIPTION_FACTOR_ACTIVITY_PROTEIN_BINDING		435	0.228028	1.0081	0.44484	0.77465	1	1495	tags=15%, list=13%, signal=16%
GO_POSITIVE_REGULATION_OF_CELLULAR_PROTEIN_CATABOLIC_PROCESS	GO_POSITIVE_REGULATION_OF_CELLULAR_PROTEIN_CATABOLIC_PROCESS		158	0.252567	1.00785	0.428305	0.774357	1	2518	tags=29%, list=22%, signal=37%
GO_REGULATION_OF_ERYTHROCYTE_DIFFERENTIATION	GO_REGULATION_OF_ERYTHROCYTE_DIFFERENTIATION		28	0.345815	1.00678	0.436673	0.776768	1	796	tags=14%, list=7%, signal=15%
GO_REGULATION_OF_CELLULAR_PROTEIN_CATABOLIC_PROCESS	GO_REGULATION_OF_CELLULAR_PROTEIN_CATABOLIC_PROCESS		219	0.242192	1.00584	0.422807	0.77861	1	2518	tags=30%, list=22%, signal=37%
GO_EXOCYTIC_VESICLE	GO_EXOCYTIC_VESICLE		72	0.283826	1.00559	0.425197	0.778347	1	1744	tags=19%, list=15%, signal=23%
GO_SUBSTANTIA_NIGRA_DEVELOPMENT	GO_SUBSTANTIA_NIGRA_DEVELOPMENT		36	0.327559	1.0048	0.43074	0.779861	1	1225	tags=14%, list=11%, signal=15%
GO_POSITIVE_REGULATION_OF_PROTEIN_BINDING	GO_POSITIVE_REGULATION_OF_PROTEIN_BINDING		52	0.298649	1.00408	0.440385	0.781122	1	1466	tags=19%, list=13%, signal=22%
GO_PROTEIN_LOCALIZATION_TO_CYTOSKELETON	GO_PROTEIN_LOCALIZATION_TO_CYTOSKELETON		22	0.367691	1.00337	0.439771	0.78236	1	4145	tags=64%, list=36%, signal=99%
GO_POSITIVE_REGULATION_OF_HISTONE_METHYLATION	GO_POSITIVE_REGULATION_OF_HISTONE_METHYLATION		26	0.347279	1.00329	0.444444	0.7816	1	3489	tags=46%, list=30%, signal=66%
GO_REGULATION_OF_CENTROSOME_DUPLICATION	GO_REGULATION_OF_CENTROSOME_DUPLICATION		26	0.346004	1.00188	0.458824	0.784978	1	2392	tags=31%, list=21%, signal=39%
GO_RNA_POLYMERASE_II_DISTAL_ENHANCER_SEQUENCE_SPECIFIC_DNA_BINDING	GO_RNA_POLYMERASE_II_DISTAL_ENHANCER_SEQUENCE_SPECIFIC_DNA_BINDING		46	0.310475	1.00182	0.459048	0.784142	1	2170	tags=26%, list=19%, signal=32%
GO_TRANSFERASE_ACTIVITY_TRANSFERRING_ACYL_GROUPS	GO_TRANSFERASE_ACTIVITY_TRANSFERRING_ACYL_GROUPS		172	0.247725	1.0015	0.422179	0.784128	1	1270	tags=14%, list=11%, signal=15%
GO_MITOCHONDRIAL_TRANSMEMBRANE_TRANSPORT	GO_MITOCHONDRIAL_TRANSMEMBRANE_TRANSPORT		46	0.302424	1.00125	0.451866	0.783885	1	3360	tags=41%, list=29%, signal=58%
GO_CENTROSOME_CYCLE	GO_CENTROSOME_CYCLE		39	0.317799	1.00108	0.440252	0.783409	1	3822	tags=46%, list=33%, signal=69%
GO_TRANSMISSION_OF_NERVE_IMPULSE	GO_TRANSMISSION_OF_NERVE_IMPULSE		16	0.385456	0.999785	0.447423	0.786434	1	2300	tags=31%, list=20%, signal=39%
GO_PHOTORECEPTOR_OUTER_SEGMENT	GO_PHOTORECEPTOR_OUTER_SEGMENT		26	0.347607	0.999719	0.464078	0.785609	1	3457	tags=38%, list=30%, signal=55%
GO_PROTEIN_ALKYLATION	GO_PROTEIN_ALKYLATION		75	0.280514	0.999495	0.450397	0.785302	1	3206	tags=41%, list=28%, signal=57%
GO_REGULATION_OF_PHOSPHOLIPASE_C_ACTIVITY	GO_REGULATION_OF_PHOSPHOLIPASE_C_ACTIVITY		18	0.381653	0.99945	0.452	0.784385	1	214	tags=11%, list=2%, signal=11%
GO_EMBRYONIC_PATTERN_SPECIFICATION	GO_EMBRYONIC_PATTERN_SPECIFICATION		18	0.379255	0.997922	0.447674	0.788155	1	1306	tags=17%, list=11%, signal=19%
GO_CELLULAR_PROTEIN_COMPLEX_ASSEMBLY	GO_CELLULAR_PROTEIN_COMPLEX_ASSEMBLY		243	0.238268	0.997736	0.45951	0.787665	1	2066	tags=21%, list=18%, signal=25%
GO_PROTEIN_N_TERMINUS_BINDING	GO_PROTEIN_N_TERMINUS_BINDING		81	0.275528	0.997666	0.466403	0.786854	1	1164	tags=17%, list=10%, signal=19%
GO_RESPONSE_TO_ISCHEMIA	GO_RESPONSE_TO_ISCHEMIA		21	0.360282	0.997619	0.481013	0.785983	1	1973	tags=33%, list=17%, signal=40%
GO_SENSORY_ORGAN_DEVELOPMENT	GO_SENSORY_ORGAN_DEVELOPMENT		214	0.244543	0.997322	0.459459	0.785933	1	1217	tags=14%, list=11%, signal=16%
GO_FIBROBLAST_GROWTH_FACTOR_RECEPTOR_SIGNALING_PATHWAY	GO_FIBROBLAST_GROWTH_FACTOR_RECEPTOR_SIGNALING_PATHWAY		57	0.296452	0.996607	0.462136	0.787187	1	3498	tags=46%, list=30%, signal=65%
GO_CELLULAR_RESPONSE_TO_INTERLEUKIN_4	GO_CELLULAR_RESPONSE_TO_INTERLEUKIN_4		22	0.362153	0.996114	0.470019	0.787705	1	1798	tags=36%, list=16%, signal=43%
GO_SMALL_RIBOSOMAL_SUBUNIT	GO_SMALL_RIBOSOMAL_SUBUNIT		65	0.285518	0.994932	0.475728	0.790415	1	1523	tags=15%, list=13%, signal=18%
GO_NUCLEAR_MEMBRANE	GO_NUCLEAR_MEMBRANE		200	0.242176	0.994619	0.460111	0.790397	1	1087	tags=13%, list=9%, signal=14%
GO_CELLULAR_METABOLIC_COMPOUND_SALVAGE	GO_CELLULAR_METABOLIC_COMPOUND_SALVAGE		30	0.326982	0.993579	0.440882	0.79273	1	3552	tags=53%, list=31%, signal=77%
GO_ENDODEOXYRIBONUCLEASE_ACTIVITY	GO_ENDODEOXYRIBONUCLEASE_ACTIVITY		45	0.308781	0.99338	0.470037	0.792303	1	2054	tags=24%, list=18%, signal=30%
GO_EPITHELIAL_CELL_DIFFERENTIATION	GO_EPITHELIAL_CELL_DIFFERENTIATION		239	0.238147	0.992546	0.470909	0.793922	1	1186	tags=13%, list=10%, signal=14%
GO_ORGANELLE_DISASSEMBLY	GO_ORGANELLE_DISASSEMBLY		128	0.258333	0.992462	0.486486	0.793181	1	2489	tags=22%, list=21%, signal=28%
GO_SIGNAL_TRANSDUCTION_IN_RESPONSE_TO_DNA_DAMAGE	GO_SIGNAL_TRANSDUCTION_IN_RESPONSE_TO_DNA_DAMAGE		82	0.273502	0.992092	0.465619	0.793377	1	1731	tags=23%, list=15%, signal=27%
GO_REGULATION_OF_VACUOLAR_TRANSPORT	GO_REGULATION_OF_VACUOLAR_TRANSPORT		25	0.343546	0.991206	0.461255	0.795057	1	858	tags=12%, list=7%, signal=13%
GO_MULTI_ORGANISM_BEHAVIOR	GO_MULTI_ORGANISM_BEHAVIOR		37	0.316598	0.990791	0.451197	0.795377	1	2419	tags=27%, list=21%, signal=34%
GO_STEROID_BINDING	GO_STEROID_BINDING		40	0.310125	0.990542	0.467456	0.795106	1	1921	tags=25%, list=17%, signal=30%
GO_NUCLEOBASE_METABOLIC_PROCESS	GO_NUCLEOBASE_METABOLIC_PROCESS		32	0.322207	0.989439	0.475248	0.797628	1	2793	tags=34%, list=24%, signal=45%
GO_DNA_DEPENDENT_DNA_REPLICATION_MAINTENANCE_OF_FIDELITY	GO_DNA_DEPENDENT_DNA_REPLICATION_MAINTENANCE_OF_FIDELITY		17	0.391468	0.989288	0.493204	0.797098	1	2846	tags=35%, list=25%, signal=47%
GO_REGULATION_OF_MITOCHONDRIAL_MEMBRANE_PERMEABILITY_INVOLVED_IN_APOPTOTIC_PROCESS	GO_REGULATION_OF_MITOCHONDRIAL_MEMBRANE_PERMEABILITY_INVOLVED_IN_APOPTOTIC_PROCESS		21	0.363289	0.988616	0.46988	0.798242	1	3303	tags=48%, list=29%, signal=67%
GO_HEXOSE_CATABOLIC_PROCESS	GO_HEXOSE_CATABOLIC_PROCESS		33	0.326981	0.987922	0.485294	0.799476	1	1675	tags=24%, list=14%, signal=28%
GO_UBIQUITIN_LIGASE_COMPLEX	GO_UBIQUITIN_LIGASE_COMPLEX		204	0.238541	0.987788	0.493783	0.79887	1	2871	tags=30%, list=25%, signal=40%
GO_POSTTRANSCRIPTIONAL_REGULATION_OF_GENE_EXPRESSION	GO_POSTTRANSCRIPTIONAL_REGULATION_OF_GENE_EXPRESSION		358	0.22389	0.986877	0.468085	0.800744	1	3059	tags=32%, list=26%, signal=42%
GO_NUCLEAR_EUCHROMATIN	GO_NUCLEAR_EUCHROMATIN		20	0.364395	0.98684	0.49703	0.799842	1	1111	tags=20%, list=10%, signal=22%
GO_DICARBOXYLIC_ACID_METABOLIC_PROCESS	GO_DICARBOXYLIC_ACID_METABOLIC_PROCESS		66	0.282535	0.984614	0.493648	0.805808	1	1439	tags=15%, list=12%, signal=17%
GO_P53_BINDING	GO_P53_BINDING		51	0.292237	0.98392	0.498113	0.806918	1	2354	tags=29%, list=20%, signal=37%
GO_NUCLEOSIDE_TRIPHOSPHATE_METABOLIC_PROCESS	GO_NUCLEOSIDE_TRIPHOSPHATE_METABOLIC_PROCESS		178	0.241339	0.983057	0.511321	0.808648	1	2365	tags=24%, list=20%, signal=29%
GO_BASE_EXCISION_REPAIR	GO_BASE_EXCISION_REPAIR		37	0.32	0.981976	0.477927	0.811073	1	2893	tags=32%, list=25%, signal=43%
GO_HISTONE_MONOUBIQUITINATION	GO_HISTONE_MONOUBIQUITINATION		20	0.359949	0.981537	0.460348	0.811498	1	2308	tags=35%, list=20%, signal=44%
GO_NUCLEOTIDE_PHOSPHORYLATION	GO_NUCLEOTIDE_PHOSPHORYLATION		41	0.306569	0.981527	0.472169	0.810502	1	1268	tags=20%, list=11%, signal=22%
GO_REGULATION_OF_CIRCADIAN_RHYTHM	GO_REGULATION_OF_CIRCADIAN_RHYTHM		65	0.277854	0.980464	0.478022	0.812922	1	1487	tags=23%, list=13%, signal=26%
GO_HISTONE_DEACETYLASE_COMPLEX	GO_HISTONE_DEACETYLASE_COMPLEX		50	0.295682	0.97927	0.473161	0.815717	1	1831	tags=20%, list=16%, signal=24%
GO_ION_ANTIPORTER_ACTIVITY	GO_ION_ANTIPORTER_ACTIVITY		22	0.349259	0.978383	0.521739	0.817507	1	2269	tags=36%, list=20%, signal=45%
GO_RESPONSE_TO_ESTROGEN	GO_RESPONSE_TO_ESTROGEN		119	0.253731	0.976742	0.51068	0.821758	1	1097	tags=13%, list=9%, signal=14%
GO_ADENYLATE_CYCLASE_INHIBITING_G_PROTEIN_COUPLED_RECEPTOR_SIGNALING_PATHWAY	GO_ADENYLATE_CYCLASE_INHIBITING_G_PROTEIN_COUPLED_RECEPTOR_SIGNALING_PATHWAY		21	0.351836	0.976088	0.491667	0.822827	1	1517	tags=19%, list=13%, signal=22%
GO_HYDROGEN_ION_TRANSMEMBRANE_TRANSPORT	GO_HYDROGEN_ION_TRANSMEMBRANE_TRANSPORT		77	0.272227	0.975974	0.50647	0.822141	1	2137	tags=26%, list=18%, signal=32%
GO_HAIR_CELL_DIFFERENTIATION	GO_HAIR_CELL_DIFFERENTIATION		20	0.362766	0.975466	0.493256	0.822714	1	1619	tags=30%, list=14%, signal=35%
GO_MYOSIN_BINDING	GO_MYOSIN_BINDING		35	0.317325	0.975353	0.495183	0.822046	1	1726	tags=20%, list=15%, signal=23%
GO_POSITIVE_REGULATION_OF_SMALL_GTPASE_MEDIATED_SIGNAL_TRANSDUCTION	GO_POSITIVE_REGULATION_OF_SMALL_GTPASE_MEDIATED_SIGNAL_TRANSDUCTION		17	0.373963	0.974421	0.501825	0.824033	1	611	tags=12%, list=5%, signal=12%
GO_ESTABLISHMENT_OF_LOCALIZATION_BY_MOVEMENT_ALONG_MICROTUBULE	GO_ESTABLISHMENT_OF_LOCALIZATION_BY_MOVEMENT_ALONG_MICROTUBULE		72	0.272698	0.974285	0.479532	0.82344	1	2233	tags=24%, list=19%, signal=29%
GO_ADAPTIVE_IMMUNE_RESPONSE_BASED_ON_SOMATIC_RECOMBINATION_OF_IMMUNE_RECEPTORS_BUILT_FROM_IMMUNOGLOBULIN_SUPERFAMILY_DOMAINS	GO_ADAPTIVE_IMMUNE_RESPONSE_BASED_ON_SOMATIC_RECOMBINATION_OF_IMMUNE_RECEPTORS_BUILT_FROM_IMMUNOGLOBULIN_SUPERFAMILY_DOMAINS		86	0.265612	0.973927	0.527076	0.82352	1	879	tags=14%, list=8%, signal=15%
GO_CYSTEINE_TYPE_PEPTIDASE_ACTIVITY	GO_CYSTEINE_TYPE_PEPTIDASE_ACTIVITY		122	0.253446	0.973226	0.507692	0.824744	1	2583	tags=25%, list=22%, signal=31%
GO_MEMBRANE_INVAGINATION	GO_MEMBRANE_INVAGINATION		18	0.37839	0.97261	0.481766	0.825642	1	2965	tags=33%, list=26%, signal=45%
GO_MICROTUBULE_BUNDLE_FORMATION	GO_MICROTUBULE_BUNDLE_FORMATION		26	0.340414	0.97206	0.484	0.826376	1	1819	tags=31%, list=16%, signal=36%
GO_PROTEIN_TRANSPORT_ALONG_MICROTUBULE	GO_PROTEIN_TRANSPORT_ALONG_MICROTUBULE		21	0.3502	0.971289	0.498127	0.827745	1	1225	tags=19%, list=11%, signal=21%
GO_OXIDOREDUCTASE_ACTIVITY_ACTING_ON_PAIRED_DONORS_WITH_INCORPORATION_OR_REDUCTION_OF_MOLECULAR_OXYGEN	GO_OXIDOREDUCTASE_ACTIVITY_ACTING_ON_PAIRED_DONORS_WITH_INCORPORATION_OR_REDUCTION_OF_MOLECULAR_OXYGEN		68	0.277409	0.970973	0.525912	0.827702	1	843	tags=12%, list=7%, signal=13%
GO_REGULATION_OF_AUTOPHAGOSOME_ASSEMBLY	GO_REGULATION_OF_AUTOPHAGOSOME_ASSEMBLY		32	0.318031	0.969848	0.499055	0.830228	1	3441	tags=38%, list=30%, signal=53%
GO_EYE_DEVELOPMENT	GO_EYE_DEVELOPMENT		148	0.24447	0.966739	0.568589	0.838923	1	1898	tags=20%, list=16%, signal=24%
GO_PIGMENT_GRANULE_LOCALIZATION	GO_PIGMENT_GRANULE_LOCALIZATION		15	0.381968	0.966592	0.505703	0.83833	1	3575	tags=53%, list=31%, signal=77%
GO_NEURAL_TUBE_PATTERNING	GO_NEURAL_TUBE_PATTERNING		15	0.382408	0.96639	0.508227	0.837953	1	1285	tags=27%, list=11%, signal=30%
GO_MYOFIBRIL_ASSEMBLY	GO_MYOFIBRIL_ASSEMBLY		19	0.363471	0.965948	0.492424	0.838339	1	624	tags=16%, list=5%, signal=17%
GO_CELLULAR_ALDEHYDE_METABOLIC_PROCESS	GO_CELLULAR_ALDEHYDE_METABOLIC_PROCESS		58	0.286045	0.964684	0.499002	0.841299	1	2232	tags=29%, list=19%, signal=36%
GO_REGULATION_OF_DNA_RECOMBINATION	GO_REGULATION_OF_DNA_RECOMBINATION		43	0.300694	0.964526	0.51619	0.840765	1	1344	tags=19%, list=12%, signal=21%
GO_REGULATION_OF_PROTEASOMAL_UBIQUITIN_DEPENDENT_PROTEIN_CATABOLIC_PROCESS	GO_REGULATION_OF_PROTEASOMAL_UBIQUITIN_DEPENDENT_PROTEIN_CATABOLIC_PROCESS		121	0.250944	0.963775	0.538462	0.842157	1	3130	tags=39%, list=27%, signal=53%
GO_NUCLEAR_TRANSCRIBED_MRNA_CATABOLIC_PROCESS_DEADENYLATION_DEPENDENT_DECAY	GO_NUCLEAR_TRANSCRIBED_MRNA_CATABOLIC_PROCESS_DEADENYLATION_DEPENDENT_DECAY		50	0.293345	0.963565	0.519305	0.841782	1	3081	tags=48%, list=27%, signal=65%
GO_PRIMARY_CILIUM	GO_PRIMARY_CILIUM		113	0.248453	0.962198	0.550095	0.845078	1	2840	tags=26%, list=25%, signal=34%
GO_MITOCHONDRIAL_GENOME_MAINTENANCE	GO_MITOCHONDRIAL_GENOME_MAINTENANCE		20	0.357912	0.961812	0.514124	0.845263	1	2284	tags=30%, list=20%, signal=37%
GO_NEGATIVE_REGULATION_OF_TRANSLATIONAL_INITIATION	GO_NEGATIVE_REGULATION_OF_TRANSLATIONAL_INITIATION		18	0.370512	0.961532	0.518518	0.845064	1	631	tags=11%, list=5%, signal=12%
GO_MICROBODY_LUMEN	GO_MICROBODY_LUMEN		32	0.312065	0.961457	0.515267	0.844258	1	1027	tags=16%, list=9%, signal=17%
GO_SOMATIC_RECOMBINATION_OF_IMMUNOGLOBULIN_GENE_SEGMENTS	GO_SOMATIC_RECOMBINATION_OF_IMMUNOGLOBULIN_GENE_SEGMENTS		20	0.354742	0.960985	0.512572	0.844751	1	1880	tags=30%, list=16%, signal=36%
GO_PROTEIN_PHOSPHATASE_2A_BINDING	GO_PROTEIN_PHOSPHATASE_2A_BINDING		22	0.348857	0.960942	0.50738	0.843868	1	1504	tags=27%, list=13%, signal=31%
GO_2_IRON_2_SULFUR_CLUSTER_BINDING	GO_2_IRON_2_SULFUR_CLUSTER_BINDING		17	0.367442	0.960749	0.51004	0.843428	1	4137	tags=59%, list=36%, signal=91%
GO_REGULATION_OF_MEMBRANE_PERMEABILITY	GO_REGULATION_OF_MEMBRANE_PERMEABILITY		60	0.284589	0.960429	0.501866	0.843395	1	1788	tags=23%, list=15%, signal=27%
GO_SOMATIC_CELL_DNA_RECOMBINATION	GO_SOMATIC_CELL_DNA_RECOMBINATION		29	0.327797	0.959523	0.512821	0.8452	1	2306	tags=31%, list=20%, signal=39%
GO_OXIDOREDUCTASE_ACTIVITY_ACTING_ON_PAIRED_DONORS_WITH_INCORPORATION_OR_REDUCTION_OF_MOLECULAR_OXYGEN_2_OXOGLUTARATE_AS_ONE_DONOR_AND_INCORPORATION_OF_ONE_ATOM_EACH_OF_OXYGEN_INTO_BOTH_DONORS	GO_OXIDOREDUCTASE_ACTIVITY_ACTING_ON_PAIRED_DONORS_WITH_INCORPORATION_OR_REDUCTION_OF_MOLECULAR_OXYGEN_2_OXOGLUTARATE_AS_ONE_DONOR_AND_INCORPORATION_OF_ONE_ATOM_EACH_OF_OXYGEN_INTO_BOTH_DONORS		32	0.315575	0.958677	0.531915	0.846834	1	3510	tags=38%, list=30%, signal=54%
GO_CEREBRAL_CORTEX_DEVELOPMENT	GO_CEREBRAL_CORTEX_DEVELOPMENT		61	0.282871	0.95855	0.520325	0.846198	1	2077	tags=26%, list=18%, signal=32%
GO_POSITIVE_REGULATION_OF_VIRAL_GENOME_REPLICATION	GO_POSITIVE_REGULATION_OF_VIRAL_GENOME_REPLICATION		28	0.32825	0.958463	0.531073	0.84544	1	2999	tags=43%, list=26%, signal=58%
GO_MUSCLE_CELL_DEVELOPMENT	GO_MUSCLE_CELL_DEVELOPMENT		60	0.279493	0.958159	0.530387	0.845322	1	1886	tags=23%, list=16%, signal=28%
GO_POSITIVE_REGULATION_OF_NEURAL_PRECURSOR_CELL_PROLIFERATION	GO_POSITIVE_REGULATION_OF_NEURAL_PRECURSOR_CELL_PROLIFERATION		17	0.366408	0.957637	0.52381	0.845914	1	938	tags=18%, list=8%, signal=19%
GO_PROTEIN_POLYMERIZATION	GO_PROTEIN_POLYMERIZATION		44	0.296361	0.956934	0.539216	0.847132	1	1502	tags=20%, list=13%, signal=23%
GO_ETHANOLAMINE_CONTAINING_COMPOUND_METABOLIC_PROCESS	GO_ETHANOLAMINE_CONTAINING_COMPOUND_METABOLIC_PROCESS		46	0.292598	0.956782	0.540797	0.84656	1	1097	tags=15%, list=9%, signal=17%
GO_SIN3_TYPE_COMPLEX	GO_SIN3_TYPE_COMPLEX		16	0.375189	0.954173	0.530612	0.853724	1	1831	tags=25%, list=16%, signal=30%
GO_SIGNAL_SEQUENCE_BINDING	GO_SIGNAL_SEQUENCE_BINDING		32	0.312642	0.953871	0.543233	0.853686	1	3362	tags=41%, list=29%, signal=57%
GO_CELLULAR_RESPONSE_TO_ESTROGEN_STIMULUS	GO_CELLULAR_RESPONSE_TO_ESTROGEN_STIMULUS		24	0.335439	0.953747	0.524904	0.853066	1	3332	tags=46%, list=29%, signal=64%
GO_APICAL_JUNCTION_COMPLEX	GO_APICAL_JUNCTION_COMPLEX		64	0.275266	0.952826	0.527027	0.85491	1	1209	tags=16%, list=10%, signal=17%
GO_CILIARY_PART	GO_CILIARY_PART		162	0.237838	0.952134	0.558182	0.85608	1	2698	tags=25%, list=23%, signal=32%
GO_POSITIVE_REGULATION_OF_RNA_SPLICING	GO_POSITIVE_REGULATION_OF_RNA_SPLICING		18	0.363599	0.951756	0.527559	0.856231	1	1366	tags=28%, list=12%, signal=31%
GO_RESPONSE_TO_EPIDERMAL_GROWTH_FACTOR	GO_RESPONSE_TO_EPIDERMAL_GROWTH_FACTOR		20	0.351497	0.951738	0.530333	0.855265	1	701	tags=15%, list=6%, signal=16%
GO_PROTEIN_LOCALIZATION_TO_LYSOSOME	GO_PROTEIN_LOCALIZATION_TO_LYSOSOME		17	0.373034	0.951665	0.512241	0.854487	1	3813	tags=41%, list=33%, signal=61%
GO_POSITIVE_REGULATION_OF_CANONICAL_WNT_SIGNALING_PATHWAY	GO_POSITIVE_REGULATION_OF_CANONICAL_WNT_SIGNALING_PATHWAY		80	0.26444	0.95155	0.56848	0.853819	1	2335	tags=24%, list=20%, signal=30%
GO_RNA_POLYMERASE_II_TRANSCRIPTION_COACTIVATOR_ACTIVITY	GO_RNA_POLYMERASE_II_TRANSCRIPTION_COACTIVATOR_ACTIVITY		21	0.345765	0.95145	0.498069	0.853135	1	2517	tags=19%, list=22%, signal=24%
GO_NUCLEOSIDE_DIPHOSPHATE_METABOLIC_PROCESS	GO_NUCLEOSIDE_DIPHOSPHATE_METABOLIC_PROCESS		58	0.27744	0.950162	0.532347	0.856086	1	1735	tags=21%, list=15%, signal=24%
GO_NEURONAL_POSTSYNAPTIC_DENSITY	GO_NEURONAL_POSTSYNAPTIC_DENSITY		28	0.323004	0.949825	0.539652	0.856105	1	2362	tags=32%, list=20%, signal=40%
GO_REGULATION_OF_CYTOSKELETON_ORGANIZATION	GO_REGULATION_OF_CYTOSKELETON_ORGANIZATION		348	0.217949	0.949322	0.639706	0.856681	1	2065	tags=20%, list=18%, signal=23%
GO_NEGATIVE_REGULATION_OF_BINDING	GO_NEGATIVE_REGULATION_OF_BINDING		99	0.258026	0.949149	0.567251	0.856189	1	2188	tags=26%, list=19%, signal=32%
GO_REGULATION_OF_BINDING	GO_REGULATION_OF_BINDING		207	0.231529	0.948268	0.6	0.857873	1	2188	tags=22%, list=19%, signal=27%
GO_BETA_AMYLOID_BINDING	GO_BETA_AMYLOID_BINDING		16	0.369497	0.947797	0.522505	0.85831	1	15	tags=6%, list=0%, signal=6%
GO_MULTIVESICULAR_BODY_ORGANIZATION	GO_MULTIVESICULAR_BODY_ORGANIZATION		30	0.315328	0.947224	0.515539	0.859116	1	1248	tags=17%, list=11%, signal=19%
GO_POSTSYNAPTIC_MEMBRANE	GO_POSTSYNAPTIC_MEMBRANE		74	0.268144	0.946773	0.548983	0.859533	1	1209	tags=11%, list=10%, signal=12%
GO_RESPONSE_TO_INTERLEUKIN_4	GO_RESPONSE_TO_INTERLEUKIN_4		24	0.340612	0.946329	0.515748	0.859869	1	1798	tags=33%, list=16%, signal=39%
GO_SIGNALING_RECEPTOR_ACTIVITY	GO_SIGNALING_RECEPTOR_ACTIVITY		355	0.215919	0.945828	0.643396	0.860353	1	1175	tags=12%, list=10%, signal=12%
GO_MONOSACCHARIDE_METABOLIC_PROCESS	GO_MONOSACCHARIDE_METABOLIC_PROCESS		129	0.242657	0.945651	0.573832	0.859857	1	1417	tags=19%, list=12%, signal=22%
GO_INNER_MITOCHONDRIAL_MEMBRANE_PROTEIN_COMPLEX	GO_INNER_MITOCHONDRIAL_MEMBRANE_PROTEIN_COMPLEX		91	0.256848	0.945616	0.564394	0.858958	1	2066	tags=19%, list=18%, signal=23%
GO_ESTABLISHMENT_OF_MITOTIC_SPINDLE_LOCALIZATION	GO_ESTABLISHMENT_OF_MITOTIC_SPINDLE_LOCALIZATION		19	0.354739	0.944144	0.53229	0.862513	1	84	tags=11%, list=1%, signal=11%
GO_CELL_FATE_SPECIFICATION	GO_CELL_FATE_SPECIFICATION		19	0.346496	0.943518	0.527027	0.863499	1	1963	tags=32%, list=17%, signal=38%
GO_SYNAPTIC_SIGNALING	GO_SYNAPTIC_SIGNALING		147	0.23882	0.94263	0.603175	0.865137	1	1100	tags=12%, list=9%, signal=13%
GO_ORGANOPHOSPHATE_BIOSYNTHETIC_PROCESS	GO_ORGANOPHOSPHATE_BIOSYNTHETIC_PROCESS		331	0.217064	0.942485	0.640071	0.864578	1	1511	tags=14%, list=13%, signal=16%
GO_ADP_METABOLIC_PROCESS	GO_ADP_METABOLIC_PROCESS		34	0.310892	0.942151	0.544534	0.864595	1	1268	tags=21%, list=11%, signal=23%
GO_POSITIVE_REGULATION_OF_TOR_SIGNALING	GO_POSITIVE_REGULATION_OF_TOR_SIGNALING		23	0.338207	0.942039	0.559041	0.863914	1	1536	tags=22%, list=13%, signal=25%
GO_MULTICELLULAR_ORGANISM_REPRODUCTION	GO_MULTICELLULAR_ORGANISM_REPRODUCTION		378	0.214454	0.94051	0.658627	0.867567	1	1710	tags=17%, list=15%, signal=20%
GO_CELL_BODY	GO_CELL_BODY		243	0.222787	0.940229	0.648148	0.867429	1	2240	tags=23%, list=19%, signal=28%
GO_CILIARY_TIP	GO_CILIARY_TIP		34	0.30788	0.940104	0.556622	0.866767	1	2458	tags=29%, list=21%, signal=37%
GO_PROTEIN_METHYLTRANSFERASE_ACTIVITY	GO_PROTEIN_METHYLTRANSFERASE_ACTIVITY		53	0.27714	0.939943	0.581109	0.866263	1	2915	tags=40%, list=25%, signal=53%
GO_CARDIAC_MUSCLE_TISSUE_MORPHOGENESIS	GO_CARDIAC_MUSCLE_TISSUE_MORPHOGENESIS		21	0.343342	0.939809	0.560158	0.865692	1	1228	tags=19%, list=11%, signal=21%
GO_TETRAPYRROLE_METABOLIC_PROCESS	GO_TETRAPYRROLE_METABOLIC_PROCESS		37	0.299931	0.939384	0.562745	0.865974	1	2879	tags=38%, list=25%, signal=50%
GO_PURINE_NUCLEOBASE_METABOLIC_PROCESS	GO_PURINE_NUCLEOBASE_METABOLIC_PROCESS		17	0.361117	0.939151	0.553435	0.86566	1	2793	tags=35%, list=24%, signal=46%
GO_MUSCLE_CELL_DIFFERENTIATION	GO_MUSCLE_CELL_DIFFERENTIATION		124	0.239954	0.938813	0.588561	0.865703	1	1924	tags=20%, list=17%, signal=24%
GO_METALLOENDOPEPTIDASE_ACTIVITY	GO_METALLOENDOPEPTIDASE_ACTIVITY		34	0.307118	0.938614	0.564299	0.865279	1	745	tags=12%, list=6%, signal=13%
GO_HISTONE_UBIQUITINATION	GO_HISTONE_UBIQUITINATION		29	0.320323	0.93838	0.552734	0.865028	1	2308	tags=24%, list=20%, signal=30%
GO_RIBONUCLEOSIDE_DIPHOSPHATE_METABOLIC_PROCESS	GO_RIBONUCLEOSIDE_DIPHOSPHATE_METABOLIC_PROCESS		46	0.287528	0.937492	0.574861	0.866713	1	1630	tags=22%, list=14%, signal=25%
GO_PROTON_TRANSPORTING_ATP_SYNTHASE_COMPLEX	GO_PROTON_TRANSPORTING_ATP_SYNTHASE_COMPLEX		20	0.348187	0.935709	0.587242	0.871074	1	818	tags=25%, list=7%, signal=27%
GO_TERPENOID_METABOLIC_PROCESS	GO_TERPENOID_METABOLIC_PROCESS		38	0.301849	0.935409	0.557223	0.870958	1	831	tags=16%, list=7%, signal=17%
GO_PH_REDUCTION	GO_PH_REDUCTION		27	0.318461	0.934919	0.549348	0.871455	1	553	tags=15%, list=5%, signal=16%
GO_NEGATIVE_REGULATION_OF_PROTEOLYSIS	GO_NEGATIVE_REGULATION_OF_PROTEOLYSIS		170	0.231903	0.934511	0.631868	0.871714	1	2514	tags=28%, list=22%, signal=36%
GO_GERM_CELL_DEVELOPMENT	GO_GERM_CELL_DEVELOPMENT		102	0.253054	0.93442	0.598485	0.870972	1	1379	tags=16%, list=12%, signal=18%
GO_NEURAL_NUCLEUS_DEVELOPMENT	GO_NEURAL_NUCLEUS_DEVELOPMENT		44	0.288123	0.933519	0.569231	0.87267	1	1225	tags=14%, list=11%, signal=15%
GO_POSITIVE_REGULATION_OF_PHOSPHOLIPASE_ACTIVITY	GO_POSITIVE_REGULATION_OF_PHOSPHOLIPASE_ACTIVITY		23	0.332517	0.933342	0.516899	0.87223	1	214	tags=9%, list=2%, signal=9%
GO_LYMPHOCYTE_HOMEOSTASIS	GO_LYMPHOCYTE_HOMEOSTASIS		39	0.297045	0.933011	0.581081	0.872241	1	485	tags=10%, list=4%, signal=11%
GO_CELL_PROLIFERATION	GO_CELL_PROLIFERATION		412	0.20995	0.932822	0.720217	0.871799	1	1554	tags=17%, list=13%, signal=19%
GO_ORGANELLE_LOCALIZATION	GO_ORGANELLE_LOCALIZATION		298	0.216604	0.931747	0.703636	0.874074	1	2504	tags=23%, list=22%, signal=29%
GO_NEGATIVE_REGULATION_OF_ENDOTHELIAL_CELL_PROLIFERATION	GO_NEGATIVE_REGULATION_OF_ENDOTHELIAL_CELL_PROLIFERATION		15	0.365843	0.931464	0.537753	0.873923	1	2800	tags=40%, list=24%, signal=53%
GO_DNA_METHYLATION_OR_DEMETHYLATION	GO_DNA_METHYLATION_OR_DEMETHYLATION		37	0.300935	0.931112	0.576305	0.874008	1	2105	tags=30%, list=18%, signal=36%
GO_POLYSOME	GO_POLYSOME		30	0.311852	0.930682	0.567677	0.87429	1	2588	tags=37%, list=22%, signal=47%
GO_BETA_CATENIN_BINDING	GO_BETA_CATENIN_BINDING		55	0.279492	0.930652	0.576402	0.873384	1	1304	tags=20%, list=11%, signal=22%
GO_COENZYME_BINDING	GO_COENZYME_BINDING		127	0.239026	0.930202	0.625	0.873737	1	2398	tags=23%, list=21%, signal=28%
GO_POSITIVE_REGULATION_OF_PROTEIN_ACETYLATION	GO_POSITIVE_REGULATION_OF_PROTEIN_ACETYLATION		27	0.316368	0.927046	0.563601	0.882023	1	2006	tags=26%, list=17%, signal=31%
GO_NEGATIVE_REGULATION_OF_RESPONSE_TO_CYTOKINE_STIMULUS	GO_NEGATIVE_REGULATION_OF_RESPONSE_TO_CYTOKINE_STIMULUS		28	0.317896	0.926282	0.563218	0.883344	1	547	tags=14%, list=5%, signal=15%
GO_MESENCHYME_MORPHOGENESIS	GO_MESENCHYME_MORPHOGENESIS		16	0.361242	0.926272	0.565637	0.882378	1	756	tags=19%, list=7%, signal=20%
GO_CYTOSOLIC_SMALL_RIBOSOMAL_SUBUNIT	GO_CYTOSOLIC_SMALL_RIBOSOMAL_SUBUNIT		42	0.283723	0.925366	0.607803	0.884008	1	370	tags=7%, list=3%, signal=7%
GO_SERINE_HYDROLASE_ACTIVITY	GO_SERINE_HYDROLASE_ACTIVITY		64	0.26355	0.92528	0.591171	0.883279	1	791	tags=11%, list=7%, signal=12%
GO_NEURAL_PRECURSOR_CELL_PROLIFERATION	GO_NEURAL_PRECURSOR_CELL_PROLIFERATION		39	0.293843	0.924871	0.557009	0.883501	1	883	tags=13%, list=8%, signal=14%
GO_HOMOLOGOUS_CHROMOSOME_SEGREGATION	GO_HOMOLOGOUS_CHROMOSOME_SEGREGATION		22	0.338275	0.924392	0.55694	0.883884	1	2747	tags=50%, list=24%, signal=65%
GO_REGULATION_OF_CYCLIN_DEPENDENT_PROTEIN_KINASE_ACTIVITY	GO_REGULATION_OF_CYCLIN_DEPENDENT_PROTEIN_KINASE_ACTIVITY		69	0.262355	0.923805	0.645038	0.884659	1	1445	tags=20%, list=12%, signal=23%
GO_ADULT_BEHAVIOR	GO_ADULT_BEHAVIOR		53	0.272775	0.923794	0.608856	0.88371	1	2085	tags=25%, list=18%, signal=30%
GO_POSITIVE_REGULATION_OF_WNT_SIGNALING_PATHWAY	GO_POSITIVE_REGULATION_OF_WNT_SIGNALING_PATHWAY		99	0.24583	0.923772	0.636528	0.882788	1	2335	tags=22%, list=20%, signal=28%
GO_POTASSIUM_CHANNEL_COMPLEX	GO_POTASSIUM_CHANNEL_COMPLEX		26	0.319386	0.923245	0.598148	0.883367	1	510	tags=12%, list=4%, signal=12%
GO_DIOXYGENASE_ACTIVITY	GO_DIOXYGENASE_ACTIVITY		58	0.267328	0.922667	0.586139	0.884009	1	1937	tags=19%, list=17%, signal=23%
GO_NEGATIVE_REGULATION_OF_DNA_REPLICATION	GO_NEGATIVE_REGULATION_OF_DNA_REPLICATION		42	0.288549	0.921791	0.59798	0.885556	1	2188	tags=31%, list=19%, signal=38%
GO_STRIATED_MUSCLE_CELL_DIFFERENTIATION	GO_STRIATED_MUSCLE_CELL_DIFFERENTIATION		85	0.255501	0.921207	0.634615	0.886231	1	1886	tags=21%, list=16%, signal=25%
GO_PEPTIDASE_ACTIVITY	GO_PEPTIDASE_ACTIVITY		294	0.217477	0.92116	0.703259	0.885373	1	2085	tags=18%, list=18%, signal=21%
GO_UBIQUITIN_LIKE_PROTEIN_CONJUGATING_ENZYME_ACTIVITY	GO_UBIQUITIN_LIKE_PROTEIN_CONJUGATING_ENZYME_ACTIVITY		25	0.32677	0.920135	0.571164	0.887456	1	1658	tags=24%, list=14%, signal=28%
GO_COFACTOR_BINDING	GO_COFACTOR_BINDING		179	0.225843	0.919831	0.709981	0.887351	1	2197	tags=21%, list=19%, signal=25%
GO_PROTEIN_TARGETING_TO_MITOCHONDRION	GO_PROTEIN_TARGETING_TO_MITOCHONDRION		42	0.288458	0.919375	0.589796	0.887746	1	3511	tags=38%, list=30%, signal=54%
GO_MATURE_B_CELL_DIFFERENTIATION	GO_MATURE_B_CELL_DIFFERENTIATION		15	0.36462	0.919249	0.570328	0.887134	1	291	tags=13%, list=3%, signal=14%
GO_STEROID_METABOLIC_PROCESS	GO_STEROID_METABOLIC_PROCESS		130	0.234983	0.918331	0.646586	0.888844	1	1423	tags=16%, list=12%, signal=18%
GO_GLANDULAR_EPITHELIAL_CELL_DIFFERENTIATION	GO_GLANDULAR_EPITHELIAL_CELL_DIFFERENTIATION		18	0.345084	0.917328	0.574803	0.890767	1	938	tags=22%, list=8%, signal=24%
GO_CYTOPLASMIC_MRNA_PROCESSING_BODY	GO_CYTOPLASMIC_MRNA_PROCESSING_BODY		53	0.274509	0.916933	0.622137	0.890974	1	2457	tags=25%, list=21%, signal=31%
GO_ACTIN_FILAMENT_BINDING	GO_ACTIN_FILAMENT_BINDING		75	0.253734	0.916422	0.625688	0.891566	1	973	tags=9%, list=8%, signal=10%
GO_NUCLEOBASE_CONTAINING_SMALL_MOLECULE_METABOLIC_PROCESS	GO_NUCLEOBASE_CONTAINING_SMALL_MOLECULE_METABOLIC_PROCESS		386	0.209421	0.916268	0.760073	0.891038	1	2436	tags=23%, list=21%, signal=29%
GO_PROTEIN_TARGETING_TO_LYSOSOME	GO_PROTEIN_TARGETING_TO_LYSOSOME		15	0.364486	0.916067	0.585657	0.890639	1	2902	tags=27%, list=25%, signal=36%
GO_NEGATIVE_REGULATION_OF_ACTIN_FILAMENT_DEPOLYMERIZATION	GO_NEGATIVE_REGULATION_OF_ACTIN_FILAMENT_DEPOLYMERIZATION		20	0.333137	0.916045	0.552326	0.889738	1	392	tags=10%, list=3%, signal=10%
GO_PROTEIN_COMPLEX_LOCALIZATION	GO_PROTEIN_COMPLEX_LOCALIZATION		40	0.290693	0.915927	0.582329	0.889083	1	1733	tags=23%, list=15%, signal=26%
GO_OXIDATIVE_PHOSPHORYLATION	GO_OXIDATIVE_PHOSPHORYLATION		74	0.258394	0.914938	0.617822	0.891014	1	2287	tags=23%, list=20%, signal=28%
GO_ER_TO_GOLGI_VESICLE_MEDIATED_TRANSPORT	GO_ER_TO_GOLGI_VESICLE_MEDIATED_TRANSPORT		134	0.230555	0.914258	0.658582	0.891926	1	1984	tags=19%, list=17%, signal=22%
GO_NEGATIVE_REGULATION_OF_EXTRINSIC_APOPTOTIC_SIGNALING_PATHWAY_VIA_DEATH_DOMAIN_RECEPTORS	GO_NEGATIVE_REGULATION_OF_EXTRINSIC_APOPTOTIC_SIGNALING_PATHWAY_VIA_DEATH_DOMAIN_RECEPTORS		25	0.318737	0.914194	0.599617	0.891143	1	2225	tags=28%, list=19%, signal=35%
GO_TRANSCRIPTION_COFACTOR_BINDING	GO_TRANSCRIPTION_COFACTOR_BINDING		19	0.34173	0.914017	0.588123	0.890669	1	1308	tags=26%, list=11%, signal=30%
GO_PROTEIN_UBIQUITINATION_INVOLVED_IN_UBIQUITIN_DEPENDENT_PROTEIN_CATABOLIC_PROCESS	GO_PROTEIN_UBIQUITINATION_INVOLVED_IN_UBIQUITIN_DEPENDENT_PROTEIN_CATABOLIC_PROCESS		109	0.241831	0.913964	0.667925	0.889842	1	2518	tags=28%, list=22%, signal=36%
GO_PROTEIN_LOCALIZATION_TO_ENDOPLASMIC_RETICULUM	GO_PROTEIN_LOCALIZATION_TO_ENDOPLASMIC_RETICULUM		114	0.239123	0.912804	0.649524	0.892229	1	2243	tags=21%, list=19%, signal=26%
GO_MRNA_CLEAVAGE_FACTOR_COMPLEX	GO_MRNA_CLEAVAGE_FACTOR_COMPLEX		16	0.360618	0.911768	0.60381	0.894188	1	2106	tags=38%, list=18%, signal=46%
GO_CLATHRIN_BINDING	GO_CLATHRIN_BINDING		32	0.301621	0.911158	0.60989	0.89496	1	3214	tags=41%, list=28%, signal=56%
GO_SOLUTE_CATION_SYMPORTER_ACTIVITY	GO_SOLUTE_CATION_SYMPORTER_ACTIVITY		38	0.295724	0.909933	0.620619	0.897447	1	1355	tags=21%, list=12%, signal=24%
GO_NEGATIVE_REGULATION_OF_INTRINSIC_APOPTOTIC_SIGNALING_PATHWAY_BY_P53_CLASS_MEDIATOR	GO_NEGATIVE_REGULATION_OF_INTRINSIC_APOPTOTIC_SIGNALING_PATHWAY_BY_P53_CLASS_MEDIATOR		16	0.354792	0.909565	0.566667	0.897532	1	3208	tags=44%, list=28%, signal=60%
GO_LYTIC_VACUOLE_MEMBRANE	GO_LYTIC_VACUOLE_MEMBRANE		208	0.221415	0.908877	0.724138	0.898463	1	1231	tags=12%, list=11%, signal=13%
GO_MITOCHONDRION_MORPHOGENESIS	GO_MITOCHONDRION_MORPHOGENESIS		16	0.353389	0.908089	0.575937	0.899806	1	447	tags=13%, list=4%, signal=13%
GO_PEPTIDASE_REGULATOR_ACTIVITY	GO_PEPTIDASE_REGULATOR_ACTIVITY		91	0.247403	0.908059	0.669216	0.89892	1	1741	tags=19%, list=15%, signal=22%
GO_HYDROLASE_ACTIVITY_ACTING_ON_CARBON_NITROGEN_BUT_NOT_PEPTIDE_BONDS	GO_HYDROLASE_ACTIVITY_ACTING_ON_CARBON_NITROGEN_BUT_NOT_PEPTIDE_BONDS		100	0.241571	0.907822	0.662214	0.898641	1	2105	tags=19%, list=18%, signal=23%
GO_MITOCHONDRIAL_ATP_SYNTHESIS_COUPLED_PROTON_TRANSPORT	GO_MITOCHONDRIAL_ATP_SYNTHESIS_COUPLED_PROTON_TRANSPORT		16	0.353685	0.906926	0.604206	0.900314	1	2436	tags=38%, list=21%, signal=47%
GO_REGULATION_OF_PROTEIN_TARGETING_TO_MITOCHONDRION	GO_REGULATION_OF_PROTEIN_TARGETING_TO_MITOCHONDRION		71	0.255151	0.906756	0.638095	0.899823	1	1407	tags=20%, list=12%, signal=22%
GO_PIGMENTATION	GO_PIGMENTATION		53	0.270458	0.90618	0.628571	0.900466	1	553	tags=8%, list=5%, signal=8%
GO_CRANIAL_SKELETAL_SYSTEM_DEVELOPMENT	GO_CRANIAL_SKELETAL_SYSTEM_DEVELOPMENT		26	0.306604	0.905977	0.612053	0.900066	1	4344	tags=42%, list=38%, signal=68%
GO_NEGATIVE_REGULATION_OF_GLIOGENESIS	GO_NEGATIVE_REGULATION_OF_GLIOGENESIS		21	0.330403	0.905894	0.579848	0.899334	1	2502	tags=33%, list=22%, signal=42%
GO_LIGASE_ACTIVITY_FORMING_CARBON_NITROGEN_BONDS	GO_LIGASE_ACTIVITY_FORMING_CARBON_NITROGEN_BONDS		43	0.281226	0.905729	0.625235	0.898825	1	818	tags=12%, list=7%, signal=12%
GO_STEROID_HORMONE_MEDIATED_SIGNALING_PATHWAY	GO_STEROID_HORMONE_MEDIATED_SIGNALING_PATHWAY		83	0.246475	0.905403	0.662963	0.898827	1	713	tags=11%, list=6%, signal=11%
GO_ANTERIOR_POSTERIOR_AXIS_SPECIFICATION	GO_ANTERIOR_POSTERIOR_AXIS_SPECIFICATION		18	0.340127	0.90527	0.583019	0.898233	1	1306	tags=22%, list=11%, signal=25%
GO_REGULATION_OF_HEART_GROWTH	GO_REGULATION_OF_HEART_GROWTH		19	0.339099	0.905216	0.598859	0.897427	1	918	tags=16%, list=8%, signal=17%
GO_MANNOSYLTRANSFERASE_ACTIVITY	GO_MANNOSYLTRANSFERASE_ACTIVITY		21	0.326606	0.905175	0.591954	0.896588	1	323	tags=10%, list=3%, signal=10%
GO_ALCOHOL_CATABOLIC_PROCESS	GO_ALCOHOL_CATABOLIC_PROCESS		34	0.298955	0.904829	0.614232	0.896625	1	2426	tags=26%, list=21%, signal=33%
GO_PALLIUM_DEVELOPMENT	GO_PALLIUM_DEVELOPMENT		85	0.246352	0.904331	0.655106	0.897045	1	2077	tags=24%, list=18%, signal=28%
GO_NEUTRAL_LIPID_BIOSYNTHETIC_PROCESS	GO_NEUTRAL_LIPID_BIOSYNTHETIC_PROCESS		17	0.342356	0.90326	0.577438	0.899088	1	1494	tags=18%, list=13%, signal=20%
GO_VESICLE_CYTOSKELETAL_TRAFFICKING	GO_VESICLE_CYTOSKELETAL_TRAFFICKING		29	0.303092	0.903031	0.606004	0.898814	1	292	tags=10%, list=3%, signal=11%
GO_ORGAN_FORMATION	GO_ORGAN_FORMATION		16	0.351045	0.902133	0.604247	0.900396	1	473	tags=13%, list=4%, signal=13%
GO_FATTY_ACID_CATABOLIC_PROCESS	GO_FATTY_ACID_CATABOLIC_PROCESS		57	0.26499	0.901128	0.629344	0.902246	1	1027	tags=9%, list=9%, signal=10%
GO_DENDRITE	GO_DENDRITE		226	0.214968	0.900763	0.742481	0.902276	1	2350	tags=22%, list=20%, signal=27%
GO_LYASE_ACTIVITY	GO_LYASE_ACTIVITY		122	0.23407	0.899547	0.688555	0.904636	1	1892	tags=17%, list=16%, signal=20%
GO_REGULATION_OF_ESTABLISHMENT_OF_PROTEIN_LOCALIZATION_TO_MITOCHONDRION	GO_REGULATION_OF_ESTABLISHMENT_OF_PROTEIN_LOCALIZATION_TO_MITOCHONDRION		99	0.239324	0.898397	0.706693	0.906863	1	1407	tags=19%, list=12%, signal=22%
GO_ATP_GENERATION_FROM_ADP	GO_ATP_GENERATION_FROM_ADP		27	0.310753	0.897725	0.599237	0.907737	1	1268	tags=22%, list=11%, signal=25%
GO_CELLULAR_HORMONE_METABOLIC_PROCESS	GO_CELLULAR_HORMONE_METABOLIC_PROCESS		44	0.280927	0.897661	0.602823	0.906954	1	831	tags=14%, list=7%, signal=15%
GO_TERMINAL_BOUTON	GO_TERMINAL_BOUTON		31	0.297606	0.897434	0.636023	0.906656	1	3483	tags=42%, list=30%, signal=60%
GO_N_ACYLTRANSFERASE_ACTIVITY	GO_N_ACYLTRANSFERASE_ACTIVITY		73	0.253572	0.897335	0.644283	0.905971	1	2935	tags=27%, list=25%, signal=36%
GO_MITOCHONDRIAL_TRANSPORT	GO_MITOCHONDRIAL_TRANSPORT		140	0.22792	0.896914	0.730841	0.906142	1	2137	tags=21%, list=18%, signal=26%
GO_CARBOXY_LYASE_ACTIVITY	GO_CARBOXY_LYASE_ACTIVITY		25	0.317147	0.896852	0.613281	0.905342	1	2319	tags=24%, list=20%, signal=30%
GO_SPLEEN_DEVELOPMENT	GO_SPLEEN_DEVELOPMENT		25	0.315003	0.896767	0.613153	0.904618	1	291	tags=12%, list=3%, signal=12%
GO_POSITIVE_REGULATION_OF_MRNA_METABOLIC_PROCESS	GO_POSITIVE_REGULATION_OF_MRNA_METABOLIC_PROCESS		34	0.29339	0.896476	0.63834	0.904491	1	1366	tags=24%, list=12%, signal=27%
GO_RESPONSE_TO_PROSTAGLANDIN_E	GO_RESPONSE_TO_PROSTAGLANDIN_E		15	0.360633	0.895265	0.603448	0.906782	1	3529	tags=53%, list=30%, signal=77%
GO_MONOOXYGENASE_ACTIVITY	GO_MONOOXYGENASE_ACTIVITY		29	0.295775	0.895071	0.622309	0.906353	1	843	tags=14%, list=7%, signal=15%
GO_MRNA_SPLICE_SITE_SELECTION	GO_MRNA_SPLICE_SITE_SELECTION		24	0.319439	0.894882	0.633776	0.905951	1	2031	tags=29%, list=18%, signal=35%
GO_SYNAPTIC_MEMBRANE	GO_SYNAPTIC_MEMBRANE		98	0.240875	0.894817	0.644037	0.905189	1	1209	tags=12%, list=10%, signal=14%
GO_SYNAPSE_PART	GO_SYNAPSE_PART		291	0.209549	0.894333	0.810127	0.905555	1	2124	tags=20%, list=18%, signal=23%
GO_NEGATIVE_REGULATION_OF_CELL_CYCLE_G1_S_PHASE_TRANSITION	GO_NEGATIVE_REGULATION_OF_CELL_CYCLE_G1_S_PHASE_TRANSITION		80	0.248558	0.893489	0.701403	0.906845	1	1775	tags=24%, list=15%, signal=28%
GO_GPI_ANCHOR_METABOLIC_PROCESS	GO_GPI_ANCHOR_METABOLIC_PROCESS		31	0.291942	0.893376	0.624528	0.906231	1	11	tags=3%, list=0%, signal=3%
GO_MANNOSYLATION	GO_MANNOSYLATION		26	0.310851	0.893222	0.612326	0.905695	1	540	tags=12%, list=5%, signal=12%
GO_FILAMENTOUS_ACTIN	GO_FILAMENTOUS_ACTIN		15	0.35298	0.893151	0.614943	0.904932	1	1603	tags=20%, list=14%, signal=23%
GO_POSITIVE_REGULATION_OF_LYMPHOCYTE_APOPTOTIC_PROCESS	GO_POSITIVE_REGULATION_OF_LYMPHOCYTE_APOPTOTIC_PROCESS		15	0.359329	0.892651	0.608527	0.905334	1	2030	tags=33%, list=18%, signal=40%
GO_ADENYLATE_CYCLASE_MODULATING_G_PROTEIN_COUPLED_RECEPTOR_SIGNALING_PATHWAY	GO_ADENYLATE_CYCLASE_MODULATING_G_PROTEIN_COUPLED_RECEPTOR_SIGNALING_PATHWAY		46	0.271675	0.892424	0.667323	0.904996	1	2650	tags=26%, list=23%, signal=34%
GO_PEPTIDYL_LYSINE_TRIMETHYLATION	GO_PEPTIDYL_LYSINE_TRIMETHYLATION		16	0.348839	0.891738	0.622351	0.905937	1	390	tags=13%, list=3%, signal=13%
GO_CARDIOCYTE_DIFFERENTIATION	GO_CARDIOCYTE_DIFFERENTIATION		51	0.265533	0.891634	0.652591	0.905267	1	1661	tags=18%, list=14%, signal=21%
GO_PROTEIN_TARGETING_TO_MEMBRANE	GO_PROTEIN_TARGETING_TO_MEMBRANE		141	0.227922	0.889881	0.729282	0.909066	1	2243	tags=21%, list=19%, signal=26%
GO_REGULATION_OF_SMOOTHENED_SIGNALING_PATHWAY	GO_REGULATION_OF_SMOOTHENED_SIGNALING_PATHWAY		29	0.294813	0.889209	0.637624	0.909871	1	1406	tags=14%, list=12%, signal=16%
GO_REGULATION_OF_WNT_SIGNALING_PATHWAY	GO_REGULATION_OF_WNT_SIGNALING_PATHWAY		184	0.219234	0.888625	0.76234	0.910494	1	2418	tags=24%, list=21%, signal=30%
GO_PHOSPHATASE_COMPLEX	GO_PHOSPHATASE_COMPLEX		37	0.282917	0.888578	0.646602	0.909669	1	2418	tags=24%, list=21%, signal=31%
GO_PROTEIN_UBIQUITINATION	GO_PROTEIN_UBIQUITINATION		487	0.1988	0.8882	0.885122	0.909766	1	2574	tags=24%, list=22%, signal=29%
GO_ISOPRENOID_METABOLIC_PROCESS	GO_ISOPRENOID_METABOLIC_PROCESS		54	0.263188	0.886984	0.676357	0.912083	1	892	tags=13%, list=8%, signal=14%
GO_ORGANELLAR_SMALL_RIBOSOMAL_SUBUNIT	GO_ORGANELLAR_SMALL_RIBOSOMAL_SUBUNIT		25	0.313319	0.886387	0.625954	0.912687	1	1523	tags=20%, list=13%, signal=23%
GO_REGULATION_OF_RESPONSE_TO_BIOTIC_STIMULUS	GO_REGULATION_OF_RESPONSE_TO_BIOTIC_STIMULUS		169	0.219709	0.886037	0.751866	0.912707	1	2342	tags=22%, list=20%, signal=28%
GO_LEUKOCYTE_MEDIATED_CYTOTOXICITY	GO_LEUKOCYTE_MEDIATED_CYTOTOXICITY		22	0.327235	0.885589	0.627016	0.912979	1	2320	tags=32%, list=20%, signal=40%
GO_DEOXYRIBONUCLEASE_ACTIVITY	GO_DEOXYRIBONUCLEASE_ACTIVITY		57	0.26315	0.885527	0.684109	0.912209	1	2054	tags=21%, list=18%, signal=25%
GO_ACTIVATION_OF_MAPKK_ACTIVITY	GO_ACTIVATION_OF_MAPKK_ACTIVITY		40	0.27812	0.885475	0.654691	0.911408	1	473	tags=8%, list=4%, signal=8%
GO_LYSINE_N_METHYLTRANSFERASE_ACTIVITY	GO_LYSINE_N_METHYLTRANSFERASE_ACTIVITY		33	0.289947	0.885264	0.646271	0.910991	1	2738	tags=45%, list=24%, signal=59%
GO_DEMETHYLATION	GO_DEMETHYLATION		38	0.284122	0.884611	0.639098	0.911845	1	2477	tags=26%, list=21%, signal=33%
GO_PROTEIN_TRANSMEMBRANE_TRANSPORT	GO_PROTEIN_TRANSMEMBRANE_TRANSPORT		40	0.276631	0.884323	0.675875	0.911654	1	3368	tags=48%, list=29%, signal=67%
GO_LYTIC_VACUOLE_ORGANIZATION	GO_LYTIC_VACUOLE_ORGANIZATION		43	0.272022	0.884298	0.65643	0.91079	1	798	tags=12%, list=7%, signal=12%
GO_REGULATION_OF_VACUOLE_ORGANIZATION	GO_REGULATION_OF_VACUOLE_ORGANIZATION		38	0.281195	0.884264	0.63587	0.90994	1	3441	tags=34%, list=30%, signal=49%
GO_REGULATION_OF_PROTEASOMAL_PROTEIN_CATABOLIC_PROCESS	GO_REGULATION_OF_PROTEASOMAL_PROTEIN_CATABOLIC_PROCESS		146	0.223429	0.883115	0.761649	0.911998	1	2504	tags=29%, list=22%, signal=36%
GO_NAD_BINDING	GO_NAD_BINDING		43	0.269813	0.882752	0.663443	0.912013	1	1633	tags=21%, list=14%, signal=24%
GO_BHLH_TRANSCRIPTION_FACTOR_BINDING	GO_BHLH_TRANSCRIPTION_FACTOR_BINDING		21	0.320136	0.882321	0.617063	0.912205	1	1372	tags=19%, list=12%, signal=22%
GO_INTRINSIC_COMPONENT_OF_MITOCHONDRIAL_INNER_MEMBRANE	GO_INTRINSIC_COMPONENT_OF_MITOCHONDRIAL_INNER_MEMBRANE		15	0.341882	0.882264	0.626923	0.911426	1	233	tags=7%, list=2%, signal=7%
GO_MEDIATOR_COMPLEX	GO_MEDIATOR_COMPLEX		32	0.291748	0.881324	0.653697	0.912987	1	2683	tags=34%, list=23%, signal=45%
GO_ORGANELLE_INNER_MEMBRANE	GO_ORGANELLE_INNER_MEMBRANE		412	0.199041	0.881228	0.881416	0.912299	1	2436	tags=23%, list=21%, signal=28%
GO_COFACTOR_METABOLIC_PROCESS	GO_COFACTOR_METABOLIC_PROCESS		238	0.20902	0.880809	0.817669	0.912448	1	2332	tags=24%, list=20%, signal=29%
GO_PROTEIN_POLYUBIQUITINATION	GO_PROTEIN_POLYUBIQUITINATION		212	0.214851	0.880567	0.804971	0.912162	1	2599	tags=27%, list=22%, signal=35%
GO_PURINE_CONTAINING_COMPOUND_METABOLIC_PROCESS	GO_PURINE_CONTAINING_COMPOUND_METABOLIC_PROCESS		281	0.204894	0.880152	0.830325	0.912323	1	2436	tags=22%, list=21%, signal=28%
GO_MUSCLE_CONTRACTION	GO_MUSCLE_CONTRACTION		105	0.232854	0.87976	0.738889	0.912412	1	2032	tags=19%, list=18%, signal=23%
GO_REGULATION_OF_PROTEIN_MODIFICATION_BY_SMALL_PROTEIN_CONJUGATION_OR_REMOVAL	GO_REGULATION_OF_PROTEIN_MODIFICATION_BY_SMALL_PROTEIN_CONJUGATION_OR_REMOVAL		235	0.208033	0.87766	0.823636	0.916868	1	2627	tags=28%, list=23%, signal=36%
GO_RETINA_DEVELOPMENT_IN_CAMERA_TYPE_EYE	GO_RETINA_DEVELOPMENT_IN_CAMERA_TYPE_EYE		56	0.259593	0.877401	0.677596	0.916613	1	1493	tags=20%, list=13%, signal=22%
GO_PHOSPHATIDYLINOSITOL_BISPHOSPHATE_BINDING	GO_PHOSPHATIDYLINOSITOL_BISPHOSPHATE_BINDING		43	0.271459	0.87715	0.651429	0.916328	1	1733	tags=16%, list=15%, signal=19%
GO_SYNAPSE	GO_SYNAPSE		358	0.201445	0.876996	0.855596	0.915796	1	2135	tags=19%, list=18%, signal=22%
GO_CYTOSKELETON_DEPENDENT_INTRACELLULAR_TRANSPORT	GO_CYTOSKELETON_DEPENDENT_INTRACELLULAR_TRANSPORT		87	0.23909	0.876506	0.716364	0.916117	1	2233	tags=22%, list=19%, signal=27%
GO_NEURON_NEURON_SYNAPTIC_TRANSMISSION	GO_NEURON_NEURON_SYNAPTIC_TRANSMISSION		19	0.326502	0.874926	0.654618	0.919128	1	17	tags=5%, list=0%, signal=5%
GO_CARBOHYDRATE_CATABOLIC_PROCESS	GO_CARBOHYDRATE_CATABOLIC_PROCESS		77	0.247088	0.874828	0.686312	0.918439	1	1350	tags=18%, list=12%, signal=20%
GO_REGULATION_OF_CILIUM_ASSEMBLY	GO_REGULATION_OF_CILIUM_ASSEMBLY		40	0.279045	0.874333	0.657201	0.918767	1	3243	tags=38%, list=28%, signal=52%
GO_REGULATION_OF_PROTEIN_PHOSPHATASE_TYPE_2A_ACTIVITY	GO_REGULATION_OF_PROTEIN_PHOSPHATASE_TYPE_2A_ACTIVITY		22	0.314115	0.873984	0.653386	0.918733	1	2477	tags=36%, list=21%, signal=46%
GO_ESTABLISHMENT_OR_MAINTENANCE_OF_EPITHELIAL_CELL_APICAL_BASAL_POLARITY	GO_ESTABLISHMENT_OR_MAINTENANCE_OF_EPITHELIAL_CELL_APICAL_BASAL_POLARITY		17	0.339592	0.873783	0.635674	0.9183	1	3562	tags=41%, list=31%, signal=59%
GO_RNA_SPLICING_VIA_ENDONUCLEOLYTIC_CLEAVAGE_AND_LIGATION	GO_RNA_SPLICING_VIA_ENDONUCLEOLYTIC_CLEAVAGE_AND_LIGATION		15	0.335794	0.873366	0.648184	0.918404	1	2343	tags=40%, list=20%, signal=50%
GO_TRANSCRIPTIONAL_REPRESSOR_COMPLEX	GO_TRANSCRIPTIONAL_REPRESSOR_COMPLEX		61	0.252971	0.871928	0.673704	0.921039	1	878	tags=11%, list=8%, signal=12%
GO_CARBOHYDRATE_BIOSYNTHETIC_PROCESS	GO_CARBOHYDRATE_BIOSYNTHETIC_PROCESS		79	0.238013	0.871674	0.733826	0.920751	1	1395	tags=16%, list=12%, signal=19%
GO_OXIDOREDUCTASE_ACTIVITY_ACTING_ON_A_HEME_GROUP_OF_DONORS	GO_OXIDOREDUCTASE_ACTIVITY_ACTING_ON_A_HEME_GROUP_OF_DONORS		18	0.330187	0.871404	0.626747	0.920511	1	1433	tags=22%, list=12%, signal=25%
GO_RNA_POLYMERASE_II_TRANSCRIPTION_COREPRESSOR_ACTIVITY	GO_RNA_POLYMERASE_II_TRANSCRIPTION_COREPRESSOR_ACTIVITY		18	0.329727	0.871261	0.647495	0.919975	1	2093	tags=33%, list=18%, signal=41%
GO_REGULATION_OF_CELLULAR_AMIDE_METABOLIC_PROCESS	GO_REGULATION_OF_CELLULAR_AMIDE_METABOLIC_PROCESS		266	0.205593	0.871186	0.863971	0.919251	1	3059	tags=31%, list=26%, signal=41%
GO_RETROGRADE_VESICLE_MEDIATED_TRANSPORT_GOLGI_TO_ER	GO_RETROGRADE_VESICLE_MEDIATED_TRANSPORT_GOLGI_TO_ER		67	0.248912	0.870614	0.680473	0.919694	1	2913	tags=36%, list=25%, signal=48%
GO_LIPOPROTEIN_BIOSYNTHETIC_PROCESS	GO_LIPOPROTEIN_BIOSYNTHETIC_PROCESS		71	0.245467	0.869092	0.733728	0.922539	1	1239	tags=10%, list=11%, signal=11%
GO_CELLULAR_PROCESS_INVOLVED_IN_REPRODUCTION_IN_MULTICELLULAR_ORGANISM	GO_CELLULAR_PROCESS_INVOLVED_IN_REPRODUCTION_IN_MULTICELLULAR_ORGANISM		120	0.227785	0.868471	0.765799	0.923118	1	1379	tags=15%, list=12%, signal=17%
GO_TRANSFERASE_ACTIVITY_TRANSFERRING_ACYL_GROUPS_OTHER_THAN_AMINO_ACYL_GROUPS	GO_TRANSFERASE_ACTIVITY_TRANSFERRING_ACYL_GROUPS_OTHER_THAN_AMINO_ACYL_GROUPS		149	0.216926	0.867697	0.79558	0.924098	1	1495	tags=13%, list=13%, signal=15%
GO_CIS_TRANS_ISOMERASE_ACTIVITY	GO_CIS_TRANS_ISOMERASE_ACTIVITY		28	0.296247	0.866961	0.673704	0.924941	1	2922	tags=36%, list=25%, signal=48%
GO_NEGATIVE_REGULATION_OF_CANONICAL_WNT_SIGNALING_PATHWAY	GO_NEGATIVE_REGULATION_OF_CANONICAL_WNT_SIGNALING_PATHWAY		104	0.231584	0.866739	0.740402	0.924559	1	2335	tags=26%, list=20%, signal=32%
GO_ACTIVE_ION_TRANSMEMBRANE_TRANSPORTER_ACTIVITY	GO_ACTIVE_ION_TRANSMEMBRANE_TRANSPORTER_ACTIVITY		85	0.24185	0.866069	0.752399	0.925286	1	815	tags=13%, list=7%, signal=14%
GO_RIBONUCLEOPROTEIN_COMPLEX_BINDING	GO_RIBONUCLEOPROTEIN_COMPLEX_BINDING		77	0.241452	0.865928	0.730539	0.924704	1	2884	tags=27%, list=25%, signal=36%
GO_MUSCLE_FIBER_DEVELOPMENT	GO_MUSCLE_FIBER_DEVELOPMENT		21	0.313549	0.865568	0.652087	0.924673	1	1839	tags=29%, list=16%, signal=34%
GO_MONOSACCHARIDE_BINDING	GO_MONOSACCHARIDE_BINDING		48	0.262293	0.865273	0.681574	0.92451	1	707	tags=15%, list=6%, signal=15%
GO_CARBOXYPEPTIDASE_ACTIVITY	GO_CARBOXYPEPTIDASE_ACTIVITY		15	0.34254	0.864385	0.646067	0.925794	1	1401	tags=20%, list=12%, signal=23%
GO_ADP_BINDING	GO_ADP_BINDING		24	0.305584	0.862586	0.666667	0.929235	1	975	tags=21%, list=8%, signal=23%
GO_VASCULOGENESIS	GO_VASCULOGENESIS		35	0.280544	0.862454	0.688645	0.928647	1	1669	tags=17%, list=14%, signal=20%
GO_MITOCHONDRIAL_PROTEIN_COMPLEX	GO_MITOCHONDRIAL_PROTEIN_COMPLEX		117	0.225538	0.862213	0.763566	0.928309	1	2066	tags=18%, list=18%, signal=22%
GO_POSITIVE_REGULATION_OF_CELLULAR_AMIDE_METABOLIC_PROCESS	GO_POSITIVE_REGULATION_OF_CELLULAR_AMIDE_METABOLIC_PROCESS		78	0.237292	0.862131	0.741935	0.927598	1	3059	tags=37%, list=26%, signal=50%
GO_REGULATION_OF_REPRODUCTIVE_PROCESS	GO_REGULATION_OF_REPRODUCTIVE_PROCESS		59	0.254009	0.861999	0.703154	0.927015	1	1312	tags=14%, list=11%, signal=15%
GO_UBIQUITIN_LIKE_PROTEIN_BINDING	GO_UBIQUITIN_LIKE_PROTEIN_BINDING		102	0.233135	0.86116	0.774312	0.928127	1	2075	tags=21%, list=18%, signal=25%
GO_NEGATIVE_REGULATION_OF_TUMOR_NECROSIS_FACTOR_SUPERFAMILY_CYTOKINE_PRODUCTION	GO_NEGATIVE_REGULATION_OF_TUMOR_NECROSIS_FACTOR_SUPERFAMILY_CYTOKINE_PRODUCTION		25	0.302067	0.860986	0.673664	0.927626	1	1082	tags=20%, list=9%, signal=22%
GO_PEPTIDYL_PROLINE_MODIFICATION	GO_PEPTIDYL_PROLINE_MODIFICATION		35	0.277643	0.860079	0.680734	0.92889	1	2222	tags=26%, list=19%, signal=32%
GO_PEPTIDYL_LYSINE_METHYLATION	GO_PEPTIDYL_LYSINE_METHYLATION		47	0.266194	0.859417	0.721223	0.929588	1	2738	tags=38%, list=24%, signal=50%
GO_TELENCEPHALON_DEVELOPMENT	GO_TELENCEPHALON_DEVELOPMENT		123	0.222331	0.859367	0.8125	0.928815	1	2077	tags=20%, list=18%, signal=25%
GO_PDZ_DOMAIN_BINDING	GO_PDZ_DOMAIN_BINDING		49	0.261733	0.85902	0.710526	0.928736	1	1702	tags=18%, list=15%, signal=21%
GO_ENDODERMAL_CELL_DIFFERENTIATION	GO_ENDODERMAL_CELL_DIFFERENTIATION		16	0.333802	0.858467	0.656064	0.929157	1	977	tags=19%, list=8%, signal=20%
GO_SODIUM_ION_TRANSMEMBRANE_TRANSPORT	GO_SODIUM_ION_TRANSMEMBRANE_TRANSPORT		35	0.279515	0.858197	0.68097	0.92886	1	2090	tags=26%, list=18%, signal=31%
GO_POSITIVE_REGULATION_OF_BINDING	GO_POSITIVE_REGULATION_OF_BINDING		92	0.234767	0.857983	0.751468	0.928447	1	1466	tags=16%, list=13%, signal=19%
GO_NEGATIVE_REGULATION_OF_PROTEIN_KINASE_B_SIGNALING	GO_NEGATIVE_REGULATION_OF_PROTEIN_KINASE_B_SIGNALING		25	0.304927	0.857435	0.702206	0.928817	1	1626	tags=20%, list=14%, signal=23%
GO_NIK_NF_KAPPAB_SIGNALING	GO_NIK_NF_KAPPAB_SIGNALING		76	0.240182	0.856197	0.745631	0.930771	1	2599	tags=30%, list=22%, signal=39%
GO_EXCITATORY_SYNAPSE	GO_EXCITATORY_SYNAPSE		101	0.225025	0.85604	0.781563	0.930225	1	2429	tags=27%, list=21%, signal=34%
GO_METHYLTRANSFERASE_COMPLEX	GO_METHYLTRANSFERASE_COMPLEX		79	0.240822	0.855409	0.743689	0.930742	1	2049	tags=24%, list=18%, signal=29%
GO_NEGATIVE_REGULATION_OF_GLIAL_CELL_DIFFERENTIATION	GO_NEGATIVE_REGULATION_OF_GLIAL_CELL_DIFFERENTIATION		15	0.335285	0.855322	0.640562	0.93004	1	2502	tags=33%, list=22%, signal=42%
GO_LIPOPROTEIN_METABOLIC_PROCESS	GO_LIPOPROTEIN_METABOLIC_PROCESS		91	0.23089	0.853442	0.768932	0.933435	1	1239	tags=11%, list=11%, signal=12%
GO_TRNA_BINDING	GO_TRNA_BINDING		39	0.269482	0.853296	0.712406	0.93283	1	1939	tags=18%, list=17%, signal=21%
GO_ELECTRON_CARRIER_ACTIVITY	GO_ELECTRON_CARRIER_ACTIVITY		83	0.233852	0.852102	0.769962	0.934579	1	2319	tags=25%, list=20%, signal=31%
GO_REGULATION_OF_SODIUM_ION_TRANSMEMBRANE_TRANSPORT	GO_REGULATION_OF_SODIUM_ION_TRANSMEMBRANE_TRANSPORT		27	0.292989	0.852081	0.700197	0.933735	1	383	tags=7%, list=3%, signal=8%
GO_REGULATION_OF_CHROMATIN_ORGANIZATION	GO_REGULATION_OF_CHROMATIN_ORGANIZATION		117	0.221594	0.852068	0.811395	0.93287	1	2308	tags=26%, list=20%, signal=32%
GO_MATURATION_OF_5_8S_RRNA	GO_MATURATION_OF_5_8S_RRNA		26	0.29371	0.851775	0.686654	0.932638	1	1738	tags=15%, list=15%, signal=18%
GO_RRNA_CATABOLIC_PROCESS	GO_RRNA_CATABOLIC_PROCESS		15	0.339178	0.849827	0.665392	0.93614	1	2991	tags=40%, list=26%, signal=54%
GO_SECONDARY_ACTIVE_TRANSMEMBRANE_TRANSPORTER_ACTIVITY	GO_SECONDARY_ACTIVE_TRANSMEMBRANE_TRANSPORTER_ACTIVITY		99	0.227017	0.84973	0.777574	0.935459	1	1640	tags=19%, list=14%, signal=22%
GO_MITOCHONDRIAL_MEMBRANE_ORGANIZATION	GO_MITOCHONDRIAL_MEMBRANE_ORGANIZATION		79	0.237091	0.849665	0.793173	0.934703	1	1839	tags=20%, list=16%, signal=24%
GO_PROTEIN_C_TERMINUS_BINDING	GO_PROTEIN_C_TERMINUS_BINDING		139	0.216267	0.849331	0.840385	0.934532	1	1711	tags=17%, list=15%, signal=20%
GO_REGULATION_OF_CELL_AGING	GO_REGULATION_OF_CELL_AGING		27	0.290721	0.848309	0.662813	0.935871	1	2354	tags=30%, list=20%, signal=37%
GO_LYMPHOCYTE_APOPTOTIC_PROCESS	GO_LYMPHOCYTE_APOPTOTIC_PROCESS		16	0.315647	0.848182	0.678707	0.935258	1	485	tags=13%, list=4%, signal=13%
GO_PALATE_DEVELOPMENT	GO_PALATE_DEVELOPMENT		39	0.26485	0.848147	0.714563	0.934441	1	1001	tags=13%, list=9%, signal=14%
GO_TRANSCRIPTIONAL_REPRESSOR_ACTIVITY_RNA_POLYMERASE_II_ACTIVATING_TRANSCRIPTION_FACTOR_BINDING	GO_TRANSCRIPTIONAL_REPRESSOR_ACTIVITY_RNA_POLYMERASE_II_ACTIVATING_TRANSCRIPTION_FACTOR_BINDING		31	0.288546	0.848032	0.691429	0.933834	1	863	tags=10%, list=7%, signal=10%
GO_CELL_CELL_ADHERENS_JUNCTION	GO_CELL_CELL_ADHERENS_JUNCTION		31	0.28143	0.847386	0.697446	0.934349	1	3788	tags=48%, list=33%, signal=72%
GO_REGULATION_OF_EXECUTION_PHASE_OF_APOPTOSIS	GO_REGULATION_OF_EXECUTION_PHASE_OF_APOPTOSIS		17	0.322278	0.846653	0.663327	0.935077	1	3655	tags=47%, list=32%, signal=69%
GO_NEGATIVE_REGULATION_OF_MITOCHONDRION_ORGANIZATION	GO_NEGATIVE_REGULATION_OF_MITOCHONDRION_ORGANIZATION		29	0.292657	0.846546	0.702857	0.934428	1	1725	tags=28%, list=15%, signal=32%
GO_CELLULAR_RESPIRATION	GO_CELLULAR_RESPIRATION		121	0.218559	0.846106	0.811419	0.934539	1	2287	tags=21%, list=20%, signal=26%
GO_ORGANELLE_TRANSPORT_ALONG_MICROTUBULE	GO_ORGANELLE_TRANSPORT_ALONG_MICROTUBULE		44	0.260513	0.846089	0.711765	0.93369	1	2233	tags=25%, list=19%, signal=31%
GO__DE_NOVO_PROTEIN_FOLDING	GO__DE_NOVO_PROTEIN_FOLDING		15	0.333512	0.845015	0.680851	0.935169	1	3813	tags=47%, list=33%, signal=69%
GO_REGULATION_OF_CELL_CYCLE_G2_M_PHASE_TRANSITION	GO_REGULATION_OF_CELL_CYCLE_G2_M_PHASE_TRANSITION		43	0.26476	0.845004	0.727799	0.934313	1	3161	tags=37%, list=27%, signal=51%
GO_ENDOSOME_ORGANIZATION	GO_ENDOSOME_ORGANIZATION		55	0.249724	0.844788	0.740608	0.933894	1	1877	tags=16%, list=16%, signal=19%
GO_DEMETHYLASE_ACTIVITY	GO_DEMETHYLASE_ACTIVITY		29	0.283048	0.84384	0.725898	0.935007	1	2195	tags=24%, list=19%, signal=30%
GO_POSITIVE_REGULATION_OF_CAMP_METABOLIC_PROCESS	GO_POSITIVE_REGULATION_OF_CAMP_METABOLIC_PROCESS		35	0.272592	0.842305	0.709486	0.937357	1	280	tags=6%, list=2%, signal=6%
GO_CLATHRIN_VESICLE_COAT	GO_CLATHRIN_VESICLE_COAT		20	0.314224	0.841509	0.708812	0.93822	1	2780	tags=45%, list=24%, signal=59%
GO_3_5_EXONUCLEASE_ACTIVITY	GO_3_5_EXONUCLEASE_ACTIVITY		40	0.26525	0.840405	0.732955	0.939656	1	3228	tags=30%, list=28%, signal=41%
GO_MAP_KINASE_KINASE_KINASE_ACTIVITY	GO_MAP_KINASE_KINASE_KINASE_ACTIVITY		17	0.321082	0.840355	0.71124	0.938889	1	43	tags=6%, list=0%, signal=6%
GO_SPECIFICATION_OF_SYMMETRY	GO_SPECIFICATION_OF_SYMMETRY		56	0.251802	0.840103	0.766234	0.938566	1	3065	tags=30%, list=26%, signal=41%
GO_PRENYLTRANSFERASE_ACTIVITY	GO_PRENYLTRANSFERASE_ACTIVITY		15	0.325377	0.838691	0.675676	0.940604	1	1376	tags=20%, list=12%, signal=23%
GO_ADULT_LOCOMOTORY_BEHAVIOR	GO_ADULT_LOCOMOTORY_BEHAVIOR		35	0.273207	0.837466	0.73271	0.942308	1	2085	tags=26%, list=18%, signal=31%
GO_NUCLEOBASE_CONTAINING_COMPOUND_TRANSMEMBRANE_TRANSPORTER_ACTIVITY	GO_NUCLEOBASE_CONTAINING_COMPOUND_TRANSMEMBRANE_TRANSPORTER_ACTIVITY		26	0.28539	0.837293	0.720755	0.941788	1	2712	tags=27%, list=23%, signal=35%
GO_HORMONE_RECEPTOR_BINDING	GO_HORMONE_RECEPTOR_BINDING		113	0.219076	0.836022	0.834297	0.94354	1	2222	tags=24%, list=19%, signal=29%
GO_MITOCHONDRIAL_RESPIRATORY_CHAIN_COMPLEX_ASSEMBLY	GO_MITOCHONDRIAL_RESPIRATORY_CHAIN_COMPLEX_ASSEMBLY		60	0.236956	0.835157	0.786116	0.944495	1	2261	tags=22%, list=20%, signal=27%
GO_MITOCHONDRION_LOCALIZATION	GO_MITOCHONDRION_LOCALIZATION		29	0.279072	0.835018	0.733981	0.94389	1	1846	tags=28%, list=16%, signal=33%
GO_PROTEIN_AUTOUBIQUITINATION	GO_PROTEIN_AUTOUBIQUITINATION		38	0.263104	0.833898	0.736364	0.945271	1	2599	tags=26%, list=22%, signal=34%
GO_POSITIVE_REGULATION_OF_REPRODUCTIVE_PROCESS	GO_POSITIVE_REGULATION_OF_REPRODUCTIVE_PROCESS		19	0.311119	0.833895	0.670611	0.944397	1	1312	tags=16%, list=11%, signal=18%
GO_POSITIVE_REGULATION_OF_ERYTHROCYTE_DIFFERENTIATION	GO_POSITIVE_REGULATION_OF_ERYTHROCYTE_DIFFERENTIATION		19	0.315451	0.832959	0.703407	0.945482	1	796	tags=16%, list=7%, signal=17%
GO_AXON	GO_AXON		217	0.200408	0.832525	0.912639	0.945486	1	2736	tags=25%, list=24%, signal=32%
GO_REGULATION_OF_DENDRITIC_SPINE_MORPHOGENESIS	GO_REGULATION_OF_DENDRITIC_SPINE_MORPHOGENESIS		16	0.321833	0.832044	0.699433	0.945559	1	4757	tags=56%, list=41%, signal=95%
GO_PROTEIN_K63_LINKED_UBIQUITINATION	GO_PROTEIN_K63_LINKED_UBIQUITINATION		30	0.278551	0.831005	0.713178	0.946705	1	2599	tags=33%, list=22%, signal=43%
GO_STRUCTURAL_CONSTITUENT_OF_MUSCLE	GO_STRUCTURAL_CONSTITUENT_OF_MUSCLE		23	0.292139	0.830807	0.718563	0.946204	1	828	tags=13%, list=7%, signal=14%
GO_HYDROGEN_EXPORTING_ATPASE_ACTIVITY	GO_HYDROGEN_EXPORTING_ATPASE_ACTIVITY		22	0.297813	0.830786	0.706564	0.945375	1	1474	tags=18%, list=13%, signal=21%
GO_ACTIN_FILAMENT_BASED_MOVEMENT	GO_ACTIN_FILAMENT_BASED_MOVEMENT		40	0.263604	0.830745	0.740113	0.944595	1	2032	tags=18%, list=18%, signal=21%
GO_EUCHROMATIN	GO_EUCHROMATIN		25	0.29823	0.830523	0.726562	0.944186	1	1111	tags=16%, list=10%, signal=18%
GO_VITAMIN_D_RECEPTOR_BINDING	GO_VITAMIN_D_RECEPTOR_BINDING		15	0.325866	0.830317	0.690058	0.94371	1	3828	tags=60%, list=33%, signal=90%
GO_PHOSPHATIDYLINOSITOL_DEPHOSPHORYLATION	GO_PHOSPHATIDYLINOSITOL_DEPHOSPHORYLATION		17	0.320332	0.830129	0.710891	0.943206	1	3321	tags=35%, list=29%, signal=49%
GO_LEFT_RIGHT_PATTERN_FORMATION	GO_LEFT_RIGHT_PATTERN_FORMATION		16	0.330989	0.829326	0.694853	0.943977	1	2657	tags=38%, list=23%, signal=49%
GO_POSITIVE_REGULATION_OF_CYCLIC_NUCLEOTIDE_METABOLIC_PROCESS	GO_POSITIVE_REGULATION_OF_CYCLIC_NUCLEOTIDE_METABOLIC_PROCESS		39	0.259602	0.829087	0.741177	0.943578	1	280	tags=5%, list=2%, signal=5%
GO_REGULATION_OF_RNA_STABILITY	GO_REGULATION_OF_RNA_STABILITY		120	0.215566	0.828616	0.865275	0.943632	1	2457	tags=26%, list=21%, signal=32%
GO_REGULATION_OF_NECROTIC_CELL_DEATH	GO_REGULATION_OF_NECROTIC_CELL_DEATH		22	0.298142	0.828599	0.715431	0.942802	1	2212	tags=36%, list=19%, signal=45%
GO_MRNA_3_UTR_BINDING	GO_MRNA_3_UTR_BINDING		38	0.262863	0.828599	0.783231	0.941938	1	2442	tags=34%, list=21%, signal=43%
GO_COENZYME_METABOLIC_PROCESS	GO_COENZYME_METABOLIC_PROCESS		187	0.203554	0.828518	0.901304	0.941241	1	2332	tags=24%, list=20%, signal=29%
GO_RESPIRATORY_GASEOUS_EXCHANGE	GO_RESPIRATORY_GASEOUS_EXCHANGE		25	0.289475	0.827002	0.741177	0.943352	1	2287	tags=28%, list=20%, signal=35%
GO_PHOSPHOTRANSFERASE_ACTIVITY_FOR_OTHER_SUBSTITUTED_PHOSPHATE_GROUPS	GO_PHOSPHOTRANSFERASE_ACTIVITY_FOR_OTHER_SUBSTITUTED_PHOSPHATE_GROUPS		16	0.319049	0.825512	0.704142	0.945333	1	3500	tags=44%, list=30%, signal=63%
GO_PYRIMIDINE_NUCLEOBASE_METABOLIC_PROCESS	GO_PYRIMIDINE_NUCLEOBASE_METABOLIC_PROCESS		16	0.322492	0.825245	0.716763	0.945029	1	2197	tags=31%, list=19%, signal=39%
GO_VESICLE_TARGETING	GO_VESICLE_TARGETING		66	0.237508	0.825203	0.810662	0.944242	1	330	tags=6%, list=3%, signal=6%
GO_HORMONE_MEDIATED_SIGNALING_PATHWAY	GO_HORMONE_MEDIATED_SIGNALING_PATHWAY		96	0.22061	0.822808	0.855691	0.947996	1	2157	tags=21%, list=19%, signal=25%
GO_HISTONE_METHYLATION	GO_HISTONE_METHYLATION		54	0.243664	0.821489	0.802281	0.949589	1	3206	tags=41%, list=28%, signal=56%
GO_POSITIVE_REGULATION_OF_EPITHELIAL_TO_MESENCHYMAL_TRANSITION	GO_POSITIVE_REGULATION_OF_EPITHELIAL_TO_MESENCHYMAL_TRANSITION		21	0.30382	0.820826	0.734918	0.950048	1	328	tags=10%, list=3%, signal=10%
GO_HISTONE_H3_DEACETYLATION	GO_HISTONE_H3_DEACETYLATION		18	0.310673	0.819917	0.724	0.950883	1	1256	tags=17%, list=11%, signal=19%
GO_HISTONE_DEUBIQUITINATION	GO_HISTONE_DEUBIQUITINATION		18	0.306813	0.819609	0.711155	0.950631	1	2318	tags=22%, list=20%, signal=28%
GO_MODIFICATION_OF_MORPHOLOGY_OR_PHYSIOLOGY_OF_OTHER_ORGANISM	GO_MODIFICATION_OF_MORPHOLOGY_OR_PHYSIOLOGY_OF_OTHER_ORGANISM		59	0.239154	0.819388	0.791103	0.950192	1	994	tags=15%, list=9%, signal=17%
GO_ACTIN_MONOMER_BINDING	GO_ACTIN_MONOMER_BINDING		19	0.307981	0.817759	0.697211	0.952338	1	1625	tags=16%, list=14%, signal=18%
GO_METALLO_SULFUR_CLUSTER_ASSEMBLY	GO_METALLO_SULFUR_CLUSTER_ASSEMBLY		16	0.32287	0.817602	0.707602	0.951755	1	3610	tags=44%, list=31%, signal=63%
GO_STEM_CELL_DIVISION	GO_STEM_CELL_DIVISION		16	0.316088	0.816428	0.702811	0.953065	1	99	tags=6%, list=1%, signal=6%
GO_RETROGRADE_TRANSPORT_ENDOSOME_TO_GOLGI	GO_RETROGRADE_TRANSPORT_ENDOSOME_TO_GOLGI		57	0.239692	0.816269	0.824219	0.952496	1	2606	tags=33%, list=23%, signal=43%
GO_LATERAL_PLASMA_MEMBRANE	GO_LATERAL_PLASMA_MEMBRANE		28	0.277851	0.816045	0.746535	0.952051	1	1846	tags=18%, list=16%, signal=21%
GO_POSTSYNAPSE	GO_POSTSYNAPSE		178	0.201891	0.815895	0.907157	0.951469	1	2442	tags=23%, list=21%, signal=29%
GO_GATED_CHANNEL_ACTIVITY	GO_GATED_CHANNEL_ACTIVITY		92	0.220338	0.815402	0.849524	0.95151	1	1982	tags=18%, list=17%, signal=22%
GO_CUL3_RING_UBIQUITIN_LIGASE_COMPLEX	GO_CUL3_RING_UBIQUITIN_LIGASE_COMPLEX		38	0.257538	0.815374	0.767391	0.950695	1	4158	tags=53%, list=36%, signal=82%
GO_BASAL_TRANSCRIPTION_MACHINERY_BINDING	GO_BASAL_TRANSCRIPTION_MACHINERY_BINDING		21	0.301823	0.81523	0.766284	0.950089	1	3206	tags=43%, list=28%, signal=59%
GO_SYNAPSIS	GO_SYNAPSIS		15	0.326349	0.814985	0.722222	0.949669	1	2747	tags=53%, list=24%, signal=70%
GO_CELLULAR_KETONE_METABOLIC_PROCESS	GO_CELLULAR_KETONE_METABOLIC_PROCESS		40	0.255126	0.814872	0.759124	0.949048	1	2211	tags=23%, list=19%, signal=28%
GO_MULTICELLULAR_ORGANISMAL_MOVEMENT	GO_MULTICELLULAR_ORGANISMAL_MOVEMENT		20	0.298326	0.814159	0.720887	0.949515	1	1562	tags=20%, list=13%, signal=23%
GO_ENDOTHELIAL_CELL_DIFFERENTIATION	GO_ENDOTHELIAL_CELL_DIFFERENTIATION		46	0.250006	0.814155	0.788104	0.94867	1	1011	tags=13%, list=9%, signal=14%
GO_RRNA_TRANSCRIPTION	GO_RRNA_TRANSCRIPTION		16	0.321294	0.814041	0.729167	0.948031	1	2510	tags=38%, list=22%, signal=48%
GO_CONTRACTILE_FIBER	GO_CONTRACTILE_FIBER		99	0.217435	0.813167	0.867675	0.948731	1	2512	tags=21%, list=22%, signal=27%
GO_POSITIVE_REGULATION_OF_MITOCHONDRIAL_OUTER_MEMBRANE_PERMEABILIZATION_INVOLVED_IN_APOPTOTIC_SIGNALING_PATHWAY	GO_POSITIVE_REGULATION_OF_MITOCHONDRIAL_OUTER_MEMBRANE_PERMEABILIZATION_INVOLVED_IN_APOPTOTIC_SIGNALING_PATHWAY		33	0.260943	0.8131	0.772894	0.947994	1	1394	tags=21%, list=12%, signal=24%
GO_BETA_TUBULIN_BINDING	GO_BETA_TUBULIN_BINDING		28	0.278769	0.812947	0.753346	0.947438	1	2123	tags=32%, list=18%, signal=39%
GO_REGULATION_OF_ORGAN_GROWTH	GO_REGULATION_OF_ORGAN_GROWTH		36	0.26048	0.812905	0.779923	0.946673	1	938	tags=14%, list=8%, signal=15%
GO_MUSCLE_ORGAN_MORPHOGENESIS	GO_MUSCLE_ORGAN_MORPHOGENESIS		28	0.274789	0.812726	0.788462	0.946141	1	1228	tags=14%, list=11%, signal=16%
GO_RESPONSE_TO_ETHANOL	GO_RESPONSE_TO_ETHANOL		77	0.228364	0.811313	0.839431	0.947772	1	3261	tags=30%, list=28%, signal=41%
GO_LUNG_EPITHELIUM_DEVELOPMENT	GO_LUNG_EPITHELIUM_DEVELOPMENT		19	0.300544	0.811181	0.734463	0.947183	1	701	tags=16%, list=6%, signal=17%
GO_TRANSCRIPTIONAL_REPRESSOR_ACTIVITY_RNA_POLYMERASE_II_TRANSCRIPTION_FACTOR_BINDING	GO_TRANSCRIPTIONAL_REPRESSOR_ACTIVITY_RNA_POLYMERASE_II_TRANSCRIPTION_FACTOR_BINDING		55	0.239952	0.810899	0.791822	0.946835	1	2616	tags=24%, list=23%, signal=30%
GO_CELL_FATE_DETERMINATION	GO_CELL_FATE_DETERMINATION		16	0.32009	0.808734	0.724206	0.949772	1	790	tags=25%, list=7%, signal=27%
GO_REGULATION_OF_ORGANELLE_ASSEMBLY	GO_REGULATION_OF_ORGANELLE_ASSEMBLY		121	0.208733	0.808244	0.883978	0.949783	1	2760	tags=26%, list=24%, signal=34%
GO_EPITHELIAL_CELL_APOPTOTIC_PROCESS	GO_EPITHELIAL_CELL_APOPTOTIC_PROCESS		16	0.312328	0.808114	0.728489	0.949179	1	3270	tags=38%, list=28%, signal=52%
GO_QUINONE_METABOLIC_PROCESS	GO_QUINONE_METABOLIC_PROCESS		19	0.305372	0.808105	0.721281	0.948352	1	2211	tags=26%, list=19%, signal=32%
GO_ENDOPEPTIDASE_ACTIVITY	GO_ENDOPEPTIDASE_ACTIVITY		180	0.199876	0.806168	0.913044	0.950906	1	2413	tags=21%, list=21%, signal=26%
GO_CELLULAR_RESPONSE_TO_EPIDERMAL_GROWTH_FACTOR_STIMULUS	GO_CELLULAR_RESPONSE_TO_EPIDERMAL_GROWTH_FACTOR_STIMULUS		15	0.317514	0.803773	0.721689	0.954134	1	580	tags=13%, list=5%, signal=14%
GO_ACTIN_CYTOSKELETON	GO_ACTIN_CYTOSKELETON		291	0.186968	0.803434	0.968635	0.953842	1	2137	tags=17%, list=18%, signal=21%
GO_TRANSCRIPTION_COREPRESSOR_ACTIVITY	GO_TRANSCRIPTION_COREPRESSOR_ACTIVITY		149	0.199652	0.801475	0.934426	0.956303	1	2099	tags=19%, list=18%, signal=23%
GO_TRANSLATION_ELONGATION_FACTOR_ACTIVITY	GO_TRANSLATION_ELONGATION_FACTOR_ACTIVITY		16	0.315944	0.800603	0.734406	0.956911	1	2884	tags=44%, list=25%, signal=58%
GO_EPITHELIAL_CELL_MORPHOGENESIS	GO_EPITHELIAL_CELL_MORPHOGENESIS		20	0.296064	0.79989	0.752874	0.957217	1	2032	tags=30%, list=18%, signal=36%
GO_ALDO_KETO_REDUCTASE_NADP_ACTIVITY	GO_ALDO_KETO_REDUCTASE_NADP_ACTIVITY		15	0.316061	0.799048	0.732448	0.957687	1	3378	tags=53%, list=29%, signal=75%
GO_POSITIVE_REGULATION_OF_CHROMATIN_MODIFICATION	GO_POSITIVE_REGULATION_OF_CHROMATIN_MODIFICATION		70	0.227554	0.796427	0.873134	0.961104	1	3489	tags=37%, list=30%, signal=53%
GO_REGULATION_OF_MITOCHONDRIAL_OUTER_MEMBRANE_PERMEABILIZATION_INVOLVED_IN_APOPTOTIC_SIGNALING_PATHWAY	GO_REGULATION_OF_MITOCHONDRIAL_OUTER_MEMBRANE_PERMEABILIZATION_INVOLVED_IN_APOPTOTIC_SIGNALING_PATHWAY		37	0.258069	0.795234	0.822957	0.962163	1	1394	tags=22%, list=12%, signal=25%
GO_REGULATION_OF_TELOMERE_CAPPING	GO_REGULATION_OF_TELOMERE_CAPPING		17	0.301072	0.795148	0.778226	0.961461	1	2535	tags=29%, list=22%, signal=38%
GO_GLUCOSAMINE_CONTAINING_COMPOUND_METABOLIC_PROCESS	GO_GLUCOSAMINE_CONTAINING_COMPOUND_METABOLIC_PROCESS		19	0.303175	0.79509	0.737374	0.960704	1	14	tags=5%, list=0%, signal=5%
GO_REGULATION_OF_T_CELL_APOPTOTIC_PROCESS	GO_REGULATION_OF_T_CELL_APOPTOTIC_PROCESS		22	0.290218	0.789986	0.771639	0.967886	1	2030	tags=27%, list=18%, signal=33%
GO_PROTEIN_LOCALIZATION_TO_MITOCHONDRION	GO_PROTEIN_LOCALIZATION_TO_MITOCHONDRION		58	0.227588	0.7899	0.824427	0.967162	1	3511	tags=36%, list=30%, signal=52%
GO_HEART_MORPHOGENESIS	GO_HEART_MORPHOGENESIS		104	0.210134	0.789219	0.914498	0.967388	1	1228	tags=12%, list=11%, signal=13%
GO_INNER_EAR_RECEPTOR_CELL_DEVELOPMENT	GO_INNER_EAR_RECEPTOR_CELL_DEVELOPMENT		18	0.299506	0.789005	0.769373	0.96686	1	1124	tags=17%, list=10%, signal=18%
GO_PORPHYRIN_CONTAINING_COMPOUND_METABOLIC_PROCESS	GO_PORPHYRIN_CONTAINING_COMPOUND_METABOLIC_PROCESS		26	0.271354	0.787378	0.794769	0.96849	1	2814	tags=38%, list=24%, signal=51%
GO_REGULATION_OF_CELLULAR_AMINO_ACID_METABOLIC_PROCESS	GO_REGULATION_OF_CELLULAR_AMINO_ACID_METABOLIC_PROCESS		53	0.236693	0.787152	0.856596	0.967988	1	2335	tags=25%, list=20%, signal=31%
GO_POSITIVE_REGULATION_OF_CELL_MATRIX_ADHESION	GO_POSITIVE_REGULATION_OF_CELL_MATRIX_ADHESION		25	0.269881	0.787064	0.772994	0.96727	1	2065	tags=32%, list=18%, signal=39%
GO_POSITIVE_REGULATION_OF_CALCIUM_ION_TRANSPORT_INTO_CYTOSOL	GO_POSITIVE_REGULATION_OF_CALCIUM_ION_TRANSPORT_INTO_CYTOSOL		29	0.265424	0.782842	0.798768	0.97285	1	1693	tags=17%, list=15%, signal=20%
GO_ARF_GUANYL_NUCLEOTIDE_EXCHANGE_FACTOR_ACTIVITY	GO_ARF_GUANYL_NUCLEOTIDE_EXCHANGE_FACTOR_ACTIVITY		16	0.310136	0.782072	0.780769	0.97317	1	1537	tags=19%, list=13%, signal=22%
GO_MYOSIN_COMPLEX	GO_MYOSIN_COMPLEX		39	0.247178	0.778986	0.819418	0.976905	1	1652	tags=15%, list=14%, signal=18%
GO_ARP2_3_COMPLEX_MEDIATED_ACTIN_NUCLEATION	GO_ARP2_3_COMPLEX_MEDIATED_ACTIN_NUCLEATION		16	0.304908	0.77798	0.765835	0.977485	1	2281	tags=25%, list=20%, signal=31%
GO_MYOBLAST_DIFFERENTIATION	GO_MYOBLAST_DIFFERENTIATION		24	0.276015	0.777287	0.814532	0.977655	1	3374	tags=33%, list=29%, signal=47%
GO_REGULATION_OF_RESPONSE_TO_EXTRACELLULAR_STIMULUS	GO_REGULATION_OF_RESPONSE_TO_EXTRACELLULAR_STIMULUS		142	0.197247	0.776483	0.972119	0.97797	1	1914	tags=19%, list=17%, signal=23%
GO_POST_TRANSLATIONAL_PROTEIN_MODIFICATION	GO_POST_TRANSLATIONAL_PROTEIN_MODIFICATION		24	0.271843	0.774677	0.801217	0.979708	1	1847	tags=17%, list=16%, signal=20%
GO_REGULATION_OF_ACTIN_FILAMENT_DEPOLYMERIZATION	GO_REGULATION_OF_ACTIN_FILAMENT_DEPOLYMERIZATION		28	0.263379	0.773073	0.812261	0.981171	1	392	tags=7%, list=3%, signal=7%
GO_INTRINSIC_COMPONENT_OF_MITOCHONDRIAL_OUTER_MEMBRANE	GO_INTRINSIC_COMPONENT_OF_MITOCHONDRIAL_OUTER_MEMBRANE		18	0.295373	0.772018	0.79566	0.981809	1	3651	tags=39%, list=32%, signal=57%
GO_ESTABLISHMENT_OF_EPITHELIAL_CELL_POLARITY	GO_ESTABLISHMENT_OF_EPITHELIAL_CELL_POLARITY		16	0.301417	0.76957	0.781853	0.984387	1	369	tags=13%, list=3%, signal=13%
GO_LIPID_PARTICLE	GO_LIPID_PARTICLE		51	0.227938	0.768359	0.87666	0.98519	1	2659	tags=31%, list=23%, signal=41%
GO_PHOSPHATIDYLINOSITOL_PHOSPHATE_PHOSPHATASE_ACTIVITY	GO_PHOSPHATIDYLINOSITOL_PHOSPHATE_PHOSPHATASE_ACTIVITY		24	0.269323	0.768206	0.824458	0.984548	1	4287	tags=46%, list=37%, signal=73%
GO_RESPONSE_TO_OSMOTIC_STRESS	GO_RESPONSE_TO_OSMOTIC_STRESS		39	0.242682	0.767916	0.839623	0.98407	1	1407	tags=18%, list=12%, signal=20%
GO_LIMBIC_SYSTEM_DEVELOPMENT	GO_LIMBIC_SYSTEM_DEVELOPMENT		50	0.236037	0.76762	0.854582	0.983596	1	3010	tags=34%, list=26%, signal=46%
GO_NEGATIVE_REGULATION_OF_INTRINSIC_APOPTOTIC_SIGNALING_PATHWAY_IN_RESPONSE_TO_DNA_DAMAGE	GO_NEGATIVE_REGULATION_OF_INTRINSIC_APOPTOTIC_SIGNALING_PATHWAY_IN_RESPONSE_TO_DNA_DAMAGE		21	0.277403	0.766356	0.823985	0.984494	1	1501	tags=19%, list=13%, signal=22%
GO_PHOSPHOLIPID_DEPHOSPHORYLATION	GO_PHOSPHOLIPID_DEPHOSPHORYLATION		18	0.293055	0.765567	0.80315	0.984679	1	3321	tags=33%, list=29%, signal=47%
GO_OXIDOREDUCTASE_ACTIVITY_ACTING_ON_NAD_P_H	GO_OXIDOREDUCTASE_ACTIVITY_ACTING_ON_NAD_P_H		72	0.218086	0.765521	0.911111	0.98389	1	2287	tags=22%, list=20%, signal=28%
GO_GTPASE_BINDING	GO_GTPASE_BINDING		226	0.181517	0.763557	0.992453	0.985675	1	2040	tags=15%, list=18%, signal=18%
GO_MITOCHONDRIAL_MEMBRANE_PART	GO_MITOCHONDRIAL_MEMBRANE_PART		140	0.196167	0.763221	0.955769	0.985267	1	3472	tags=30%, list=30%, signal=42%
GO_NEGATIVE_REGULATION_OF_ENDOCYTOSIS	GO_NEGATIVE_REGULATION_OF_ENDOCYTOSIS		27	0.266933	0.762196	0.837736	0.98579	1	3066	tags=41%, list=26%, signal=55%
GO_GLUCOSE_CATABOLIC_PROCESS	GO_GLUCOSE_CATABOLIC_PROCESS		20	0.280345	0.761667	0.824299	0.985615	1	1268	tags=20%, list=11%, signal=22%
GO_TRANSCRIPTION_FACTOR_TFIID_COMPLEX	GO_TRANSCRIPTION_FACTOR_TFIID_COMPLEX		19	0.287349	0.761081	0.802817	0.985494	1	1701	tags=21%, list=15%, signal=25%
GO_BILE_ACID_METABOLIC_PROCESS	GO_BILE_ACID_METABOLIC_PROCESS		15	0.291304	0.760834	0.803846	0.984959	1	1027	tags=13%, list=9%, signal=15%
GO_WNT_SIGNALING_PATHWAY	GO_WNT_SIGNALING_PATHWAY		223	0.181864	0.760398	0.983271	0.984692	1	2407	tags=21%, list=21%, signal=26%
GO_OXIDOREDUCTION_COENZYME_METABOLIC_PROCESS	GO_OXIDOREDUCTION_COENZYME_METABOLIC_PROCESS		78	0.210327	0.758969	0.910072	0.985722	1	2319	tags=23%, list=20%, signal=29%
GO_CARDIAC_ATRIUM_DEVELOPMENT	GO_CARDIAC_ATRIUM_DEVELOPMENT		16	0.287901	0.758368	0.815891	0.985621	1	8249	tags=100%, list=71%, signal=347%
GO_CANONICAL_WNT_SIGNALING_PATHWAY	GO_CANONICAL_WNT_SIGNALING_PATHWAY		47	0.230151	0.756812	0.887597	0.98666	1	2288	tags=26%, list=20%, signal=32%
GO_SMOOTHENED_SIGNALING_PATHWAY	GO_SMOOTHENED_SIGNALING_PATHWAY		39	0.2395	0.756802	0.889535	0.985831	1	3443	tags=36%, list=30%, signal=51%
GO_RESPONSE_TO_AMMONIUM_ION	GO_RESPONSE_TO_AMMONIUM_ION		26	0.261441	0.756429	0.825243	0.985465	1	3234	tags=46%, list=28%, signal=64%
GO_SENSORY_PERCEPTION_OF_CHEMICAL_STIMULUS	GO_SENSORY_PERCEPTION_OF_CHEMICAL_STIMULUS		30	0.256504	0.75631	0.847985	0.984768	1	2705	tags=30%, list=23%, signal=39%
GO_CUL4_RING_E3_UBIQUITIN_LIGASE_COMPLEX	GO_CUL4_RING_E3_UBIQUITIN_LIGASE_COMPLEX		25	0.267973	0.756042	0.834586	0.984256	1	2430	tags=40%, list=21%, signal=51%
GO_CILIARY_PLASM	GO_CILIARY_PLASM		40	0.240024	0.755605	0.849398	0.983983	1	2256	tags=15%, list=19%, signal=19%
GO_INTRINSIC_APOPTOTIC_SIGNALING_PATHWAY_BY_P53_CLASS_MEDIATOR	GO_INTRINSIC_APOPTOTIC_SIGNALING_PATHWAY_BY_P53_CLASS_MEDIATOR		42	0.235755	0.755024	0.882917	0.983842	1	1714	tags=21%, list=15%, signal=25%
GO_OVARIAN_FOLLICLE_DEVELOPMENT	GO_OVARIAN_FOLLICLE_DEVELOPMENT		33	0.253293	0.753303	0.848837	0.985127	1	1240	tags=18%, list=11%, signal=20%
GO_SYNAPSE_ASSEMBLY	GO_SYNAPSE_ASSEMBLY		22	0.273149	0.753271	0.813492	0.984333	1	1097	tags=14%, list=9%, signal=15%
GO_NUCLEAR_LOCALIZATION_SEQUENCE_BINDING	GO_NUCLEAR_LOCALIZATION_SEQUENCE_BINDING		17	0.28811	0.752635	0.813492	0.984251	1	543	tags=12%, list=5%, signal=12%
GO_MICROTUBULE_POLYMERIZATION	GO_MICROTUBULE_POLYMERIZATION		21	0.275235	0.749589	0.843444	0.987096	1	1502	tags=19%, list=13%, signal=22%
GO_APOPTOTIC_CELL_CLEARANCE	GO_APOPTOTIC_CELL_CLEARANCE		16	0.29589	0.749459	0.801961	0.986421	1	977	tags=19%, list=8%, signal=20%
GO_RESPONSE_TO_X_RAY	GO_RESPONSE_TO_X_RAY		25	0.263628	0.748141	0.87037	0.987087	1	1163	tags=20%, list=10%, signal=22%
GO_REGULATION_OF_NITRIC_OXIDE_SYNTHASE_ACTIVITY	GO_REGULATION_OF_NITRIC_OXIDE_SYNTHASE_ACTIVITY		34	0.238755	0.747382	0.870544	0.987149	1	1788	tags=21%, list=15%, signal=24%
GO_REGULATION_OF_MACROPHAGE_DERIVED_FOAM_CELL_DIFFERENTIATION	GO_REGULATION_OF_MACROPHAGE_DERIVED_FOAM_CELL_DIFFERENTIATION		15	0.301107	0.74681	0.819767	0.98698	1	977	tags=20%, list=8%, signal=22%
GO_AUTOPHAGOSOME_ORGANIZATION	GO_AUTOPHAGOSOME_ORGANIZATION		35	0.24424	0.746196	0.856549	0.986856	1	2233	tags=26%, list=19%, signal=32%
GO_SOLUTE_CATION_ANTIPORTER_ACTIVITY	GO_SOLUTE_CATION_ANTIPORTER_ACTIVITY		17	0.287775	0.744037	0.817822	0.988493	1	3232	tags=53%, list=28%, signal=73%
GO_MULTICELLULAR_ORGANISMAL_SIGNALING	GO_MULTICELLULAR_ORGANISMAL_SIGNALING		41	0.232254	0.743844	0.897087	0.987879	1	2300	tags=24%, list=20%, signal=30%
GO_NEGATIVE_REGULATION_OF_EPITHELIAL_CELL_PROLIFERATION	GO_NEGATIVE_REGULATION_OF_EPITHELIAL_CELL_PROLIFERATION		59	0.218556	0.741926	0.927342	0.989156	1	2829	tags=29%, list=24%, signal=38%
GO_PROTEIN_TYROSINE_KINASE_BINDING	GO_PROTEIN_TYROSINE_KINASE_BINDING		36	0.238197	0.740982	0.877907	0.989354	1	1392	tags=17%, list=12%, signal=19%
GO_PROTEIN_EXPORT_FROM_NUCLEUS	GO_PROTEIN_EXPORT_FROM_NUCLEUS		26	0.253845	0.740745	0.855691	0.988789	1	1788	tags=15%, list=15%, signal=18%
GO_PROTEIN_SERINE_THREONINE_PHOSPHATASE_ACTIVITY	GO_PROTEIN_SERINE_THREONINE_PHOSPHATASE_ACTIVITY		55	0.221946	0.740122	0.921495	0.98864	1	3859	tags=36%, list=33%, signal=54%
GO_BRANCHED_CHAIN_AMINO_ACID_METABOLIC_PROCESS	GO_BRANCHED_CHAIN_AMINO_ACID_METABOLIC_PROCESS		23	0.264868	0.739612	0.832392	0.988373	1	1633	tags=17%, list=14%, signal=20%
GO_DENDRITE_DEVELOPMENT	GO_DENDRITE_DEVELOPMENT		38	0.23596	0.739171	0.878906	0.988007	1	3309	tags=45%, list=29%, signal=62%
GO_PRERIBOSOME	GO_PRERIBOSOME		56	0.22115	0.739094	0.892925	0.987266	1	1833	tags=14%, list=16%, signal=17%
GO_SUMO_TRANSFERASE_ACTIVITY	GO_SUMO_TRANSFERASE_ACTIVITY		15	0.292866	0.739039	0.811508	0.9865	1	4125	tags=60%, list=36%, signal=93%
GO_HEME_BIOSYNTHETIC_PROCESS	GO_HEME_BIOSYNTHETIC_PROCESS		18	0.280659	0.73855	0.814286	0.986223	1	2814	tags=44%, list=24%, signal=59%
GO_COLUMNAR_CUBOIDAL_EPITHELIAL_CELL_DEVELOPMENT	GO_COLUMNAR_CUBOIDAL_EPITHELIAL_CELL_DEVELOPMENT		25	0.257776	0.737666	0.859615	0.986337	1	938	tags=16%, list=8%, signal=17%
GO_UBIQUITIN_LIKE_PROTEIN_TRANSFERASE_ACTIVITY	GO_UBIQUITIN_LIKE_PROTEIN_TRANSFERASE_ACTIVITY		318	0.171259	0.737445	0.996337	0.985769	1	3643	tags=36%, list=31%, signal=52%
GO_CELLULAR_RESPONSE_TO_ESTRADIOL_STIMULUS	GO_CELLULAR_RESPONSE_TO_ESTRADIOL_STIMULUS		15	0.294637	0.736197	0.820611	0.986311	1	3326	tags=47%, list=29%, signal=65%
GO_VENTRICULAR_SYSTEM_DEVELOPMENT	GO_VENTRICULAR_SYSTEM_DEVELOPMENT		15	0.290928	0.736065	0.828512	0.985614	1	2202	tags=33%, list=19%, signal=41%
GO_DETECTION_OF_ABIOTIC_STIMULUS	GO_DETECTION_OF_ABIOTIC_STIMULUS		40	0.233734	0.735981	0.861057	0.98489	1	2429	tags=28%, list=21%, signal=35%
GO_ION_GATED_CHANNEL_ACTIVITY	GO_ION_GATED_CHANNEL_ACTIVITY		15	0.293471	0.734012	0.822222	0.98615	1	1453	tags=20%, list=13%, signal=23%
GO_INTERMEDIATE_FILAMENT_BASED_PROCESS	GO_INTERMEDIATE_FILAMENT_BASED_PROCESS		19	0.271816	0.733666	0.841621	0.985689	1	2464	tags=32%, list=21%, signal=40%
GO_S_ACYLTRANSFERASE_ACTIVITY	GO_S_ACYLTRANSFERASE_ACTIVITY		23	0.265354	0.731696	0.843511	0.986886	1	1239	tags=17%, list=11%, signal=19%
GO_SMOOTH_MUSCLE_CELL_DIFFERENTIATION	GO_SMOOTH_MUSCLE_CELL_DIFFERENTIATION		21	0.26453	0.729891	0.854508	0.987958	1	3526	tags=33%, list=30%, signal=48%
GO_NUCLEOPHAGY	GO_NUCLEOPHAGY		16	0.279112	0.72944	0.79661	0.987612	1	3186	tags=31%, list=28%, signal=43%
GO_NEGATIVE_REGULATION_OF_I_KAPPAB_KINASE_NF_KAPPAB_SIGNALING	GO_NEGATIVE_REGULATION_OF_I_KAPPAB_KINASE_NF_KAPPAB_SIGNALING		34	0.237825	0.729285	0.8861	0.986945	1	3911	tags=41%, list=34%, signal=62%
GO_UBIQUITIN_LIKE_PROTEIN_LIGASE_ACTIVITY	GO_UBIQUITIN_LIKE_PROTEIN_LIGASE_ACTIVITY		153	0.181736	0.728994	0.988785	0.986427	1	2683	tags=26%, list=23%, signal=34%
GO_CILIARY_MEMBRANE	GO_CILIARY_MEMBRANE		32	0.23887	0.727896	0.91587	0.986735	1	2484	tags=25%, list=21%, signal=32%
GO_MEMBRANE_PROTEIN_PROTEOLYSIS	GO_MEMBRANE_PROTEIN_PROTEOLYSIS		28	0.249183	0.727731	0.890772	0.986081	1	289	tags=7%, list=2%, signal=7%
GO_GTP_METABOLIC_PROCESS	GO_GTP_METABOLIC_PROCESS		17	0.28231	0.727553	0.856075	0.985438	1	3118	tags=35%, list=27%, signal=48%
GO_REGULATION_OF_PROTEIN_HOMODIMERIZATION_ACTIVITY	GO_REGULATION_OF_PROTEIN_HOMODIMERIZATION_ACTIVITY		18	0.272556	0.726696	0.838384	0.985503	1	1466	tags=22%, list=13%, signal=25%
GO_VESICLE_DOCKING_INVOLVED_IN_EXOCYTOSIS	GO_VESICLE_DOCKING_INVOLVED_IN_EXOCYTOSIS		23	0.256886	0.726627	0.840864	0.984763	1	1299	tags=17%, list=11%, signal=20%
GO_TETRAPYRROLE_BIOSYNTHETIC_PROCESS	GO_TETRAPYRROLE_BIOSYNTHETIC_PROCESS		24	0.262253	0.724095	0.87574	0.986375	1	2814	tags=42%, list=24%, signal=55%
GO_MEMBRANE_LIPID_CATABOLIC_PROCESS	GO_MEMBRANE_LIPID_CATABOLIC_PROCESS		15	0.288887	0.723657	0.843564	0.98597	1	566	tags=13%, list=5%, signal=14%
GO_CYTOCHROME_COMPLEX	GO_CYTOCHROME_COMPLEX		15	0.286635	0.722862	0.833333	0.985891	1	2287	tags=27%, list=20%, signal=33%
GO_POSITIVE_REGULATION_OF_BMP_SIGNALING_PATHWAY	GO_POSITIVE_REGULATION_OF_BMP_SIGNALING_PATHWAY		18	0.282841	0.722014	0.831683	0.985889	1	473	tags=11%, list=4%, signal=12%
GO_NEGATIVE_REGULATION_OF_DNA_METABOLIC_PROCESS	GO_NEGATIVE_REGULATION_OF_DNA_METABOLIC_PROCESS		81	0.201776	0.721533	0.951762	0.985508	1	2188	tags=22%, list=19%, signal=27%
GO_SNRNA_PROCESSING	GO_SNRNA_PROCESSING		21	0.260169	0.720023	0.846743	0.986089	1	3112	tags=38%, list=27%, signal=52%
GO_POSITIVE_REGULATION_OF_NUCLEOTIDE_METABOLIC_PROCESS	GO_POSITIVE_REGULATION_OF_NUCLEOTIDE_METABOLIC_PROCESS		50	0.2176	0.718635	0.937023	0.986531	1	280	tags=4%, list=2%, signal=4%
GO_REGULATION_OF_NEUROBLAST_PROLIFERATION	GO_REGULATION_OF_NEUROBLAST_PROLIFERATION		15	0.285441	0.718006	0.836978	0.986303	1	938	tags=13%, list=8%, signal=14%
GO_RETINA_HOMEOSTASIS	GO_RETINA_HOMEOSTASIS		30	0.242506	0.716974	0.897638	0.98646	1	2475	tags=30%, list=21%, signal=38%
GO_LIGASE_ACTIVITY_FORMING_CARBON_OXYGEN_BONDS	GO_LIGASE_ACTIVITY_FORMING_CARBON_OXYGEN_BONDS		43	0.21804	0.714938	0.935238	0.987438	1	2421	tags=21%, list=21%, signal=26%
GO_INTRACILIARY_TRANSPORT_PARTICLE_B	GO_INTRACILIARY_TRANSPORT_PARTICLE_B		17	0.272572	0.712487	0.8591	0.988749	1	3801	tags=47%, list=33%, signal=70%
GO_AXON_PART	GO_AXON_PART		108	0.185445	0.712398	0.984849	0.988016	1	2486	tags=20%, list=21%, signal=26%
GO_POSITIVE_REGULATION_OF_OSTEOBLAST_DIFFERENTIATION	GO_POSITIVE_REGULATION_OF_OSTEOBLAST_DIFFERENTIATION		34	0.233139	0.709772	0.910305	0.989489	1	1440	tags=18%, list=12%, signal=20%
GO_POSITIVE_REGULATION_OF_MITOCHONDRIAL_MEMBRANE_PERMEABILITY	GO_POSITIVE_REGULATION_OF_MITOCHONDRIAL_MEMBRANE_PERMEABILITY		18	0.265809	0.708874	0.860153	0.989442	1	4175	tags=56%, list=36%, signal=87%
GO_REGULATION_OF_POLYSACCHARIDE_METABOLIC_PROCESS	GO_REGULATION_OF_POLYSACCHARIDE_METABOLIC_PROCESS		23	0.252037	0.705743	0.898077	0.991213	1	3736	tags=48%, list=32%, signal=70%
GO_PEPTIDE_N_ACETYLTRANSFERASE_ACTIVITY	GO_PEPTIDE_N_ACETYLTRANSFERASE_ACTIVITY		52	0.21233	0.705311	0.944238	0.990761	1	2935	tags=27%, list=25%, signal=36%
GO_RESPONSE_TO_FIBROBLAST_GROWTH_FACTOR	GO_RESPONSE_TO_FIBROBLAST_GROWTH_FACTOR		70	0.202817	0.70477	0.949597	0.990405	1	3498	tags=41%, list=30%, signal=59%
GO_MICROVILLUS	GO_MICROVILLUS		35	0.228626	0.704617	0.921844	0.989729	1	977	tags=11%, list=8%, signal=12%
GO_EMBRYONIC_DIGIT_MORPHOGENESIS	GO_EMBRYONIC_DIGIT_MORPHOGENESIS		26	0.24517	0.703616	0.904297	0.989703	1	1124	tags=15%, list=10%, signal=17%
GO_NEGATIVE_REGULATION_OF_NUCLEOTIDE_METABOLIC_PROCESS	GO_NEGATIVE_REGULATION_OF_NUCLEOTIDE_METABOLIC_PROCESS		25	0.241481	0.70256	0.910603	0.989717	1	1517	tags=20%, list=13%, signal=23%
GO_POSITIVE_REGULATION_OF_CARBOHYDRATE_METABOLIC_PROCESS	GO_POSITIVE_REGULATION_OF_CARBOHYDRATE_METABOLIC_PROCESS		34	0.22265	0.700871	0.930368	0.990261	1	1312	tags=18%, list=11%, signal=20%
GO_RESPIRATORY_CHAIN	GO_RESPIRATORY_CHAIN		69	0.20048	0.699943	0.959538	0.990212	1	2627	tags=23%, list=23%, signal=30%
GO_POSITIVE_REGULATION_OF_SMOOTHENED_SIGNALING_PATHWAY	GO_POSITIVE_REGULATION_OF_SMOOTHENED_SIGNALING_PATHWAY		15	0.282024	0.699592	0.862	0.989708	1	2484	tags=20%, list=21%, signal=25%
GO_AMINO_ACID_ACTIVATION	GO_AMINO_ACID_ACTIVATION		49	0.212211	0.697978	0.928571	0.990141	1	1167	tags=12%, list=10%, signal=14%
GO_NONMOTILE_PRIMARY_CILIUM_ASSEMBLY	GO_NONMOTILE_PRIMARY_CILIUM_ASSEMBLY		18	0.258887	0.697836	0.882114	0.989453	1	2551	tags=28%, list=22%, signal=36%
GO_HEME_METABOLIC_PROCESS	GO_HEME_METABOLIC_PROCESS		21	0.257198	0.697548	0.871269	0.988875	1	3403	tags=48%, list=29%, signal=67%
GO_LYSOSOMAL_TRANSPORT	GO_LYSOSOMAL_TRANSPORT		58	0.205202	0.694872	0.950593	0.990055	1	2581	tags=21%, list=22%, signal=26%
GO_VIRION_ASSEMBLY	GO_VIRION_ASSEMBLY		35	0.22496	0.694748	0.932836	0.989358	1	2790	tags=29%, list=24%, signal=38%
GO_RESPONSE_TO_EXOGENOUS_DSRNA	GO_RESPONSE_TO_EXOGENOUS_DSRNA		25	0.240797	0.692279	0.912959	0.99038	1	1342	tags=16%, list=12%, signal=18%
GO_MACROMITOPHAGY	GO_MACROMITOPHAGY		87	0.187085	0.687585	0.978557	0.992951	1	2329	tags=16%, list=20%, signal=20%
GO_RETROMER_COMPLEX	GO_RETROMER_COMPLEX		21	0.250727	0.687014	0.89434	0.992571	1	2334	tags=33%, list=20%, signal=42%
GO_RHO_GTPASE_BINDING	GO_RHO_GTPASE_BINDING		63	0.198465	0.684249	0.961832	0.993699	1	2032	tags=17%, list=18%, signal=21%
GO_NONMOTILE_PRIMARY_CILIUM	GO_NONMOTILE_PRIMARY_CILIUM		67	0.194202	0.68334	0.970425	0.993517	1	2840	tags=24%, list=25%, signal=31%
GO_CILIUM_MORPHOGENESIS	GO_CILIUM_MORPHOGENESIS		125	0.176031	0.68325	0.9875	0.992791	1	2233	tags=18%, list=19%, signal=22%
GO_DEOXYRIBOSE_PHOSPHATE_CATABOLIC_PROCESS	GO_DEOXYRIBOSE_PHOSPHATE_CATABOLIC_PROCESS		19	0.254554	0.682424	0.907662	0.992545	1	2365	tags=26%, list=20%, signal=33%
GO_REGULATION_OF_CAMP_METABOLIC_PROCESS	GO_REGULATION_OF_CAMP_METABOLIC_PROCESS		53	0.206475	0.681833	0.953307	0.992134	1	1517	tags=11%, list=13%, signal=13%
GO_NADH_METABOLIC_PROCESS	GO_NADH_METABOLIC_PROCESS		26	0.234647	0.679367	0.924242	0.992975	1	1268	tags=15%, list=11%, signal=17%
GO_SKELETAL_MUSCLE_TISSUE_REGENERATION	GO_SKELETAL_MUSCLE_TISSUE_REGENERATION		15	0.265755	0.678538	0.859438	0.992719	1	1924	tags=27%, list=17%, signal=32%
GO_RECEPTOR_SIGNALING_PROTEIN_SERINE_THREONINE_KINASE_ACTIVITY	GO_RECEPTOR_SIGNALING_PROTEIN_SERINE_THREONINE_KINASE_ACTIVITY		68	0.193013	0.678346	0.965909	0.992061	1	608	tags=6%, list=5%, signal=6%
GO_CILIUM_ORGANIZATION	GO_CILIUM_ORGANIZATION		113	0.178261	0.678331	0.990892	0.991278	1	2574	tags=20%, list=22%, signal=26%
GO_REGULATION_OF_GLYCOGEN_METABOLIC_PROCESS	GO_REGULATION_OF_GLYCOGEN_METABOLIC_PROCESS		19	0.251714	0.677835	0.897683	0.990814	1	3326	tags=42%, list=29%, signal=59%
GO_DNA_CATABOLIC_PROCESS_ENDONUCLEOLYTIC	GO_DNA_CATABOLIC_PROCESS_ENDONUCLEOLYTIC		15	0.264816	0.677117	0.901923	0.990499	1	838	tags=13%, list=7%, signal=14%
GO_PROSTATE_GLAND_DEVELOPMENT	GO_PROSTATE_GLAND_DEVELOPMENT		24	0.238845	0.676518	0.921389	0.990094	1	473	tags=8%, list=4%, signal=9%
GO_NUCLEOTIDE_TRANSPORT	GO_NUCLEOTIDE_TRANSPORT		20	0.249256	0.671887	0.903774	0.992172	1	2712	tags=25%, list=23%, signal=33%
GO_DNA_CATABOLIC_PROCESS	GO_DNA_CATABOLIC_PROCESS		22	0.244599	0.671848	0.903733	0.991408	1	2635	tags=27%, list=23%, signal=35%
GO_NEGATIVE_REGULATION_OF_ADAPTIVE_IMMUNE_RESPONSE	GO_NEGATIVE_REGULATION_OF_ADAPTIVE_IMMUNE_RESPONSE		22	0.243031	0.670665	0.919561	0.991329	1	2281	tags=27%, list=20%, signal=34%
GO_REGULATION_OF_ESTABLISHMENT_OF_PLANAR_POLARITY	GO_REGULATION_OF_ESTABLISHMENT_OF_PLANAR_POLARITY		84	0.183176	0.670505	0.990654	0.990638	1	3730	tags=37%, list=32%, signal=54%
GO_CENTROSOME_LOCALIZATION	GO_CENTROSOME_LOCALIZATION		15	0.270624	0.669301	0.868852	0.990584	1	2480	tags=27%, list=21%, signal=34%
GO_CHANNEL_INHIBITOR_ACTIVITY	GO_CHANNEL_INHIBITOR_ACTIVITY		20	0.242593	0.660184	0.931373	0.99497	1	1342	tags=15%, list=12%, signal=17%
GO_REPRESSING_TRANSCRIPTION_FACTOR_BINDING	GO_REPRESSING_TRANSCRIPTION_FACTOR_BINDING		46	0.203023	0.659473	0.969534	0.99458	1	878	tags=11%, list=8%, signal=12%
GO_ERK1_AND_ERK2_CASCADE	GO_ERK1_AND_ERK2_CASCADE		16	0.260054	0.659436	0.911275	0.993811	1	977	tags=13%, list=8%, signal=14%
GO_MEMBRANE_PROTEIN_INTRACELLULAR_DOMAIN_PROTEOLYSIS	GO_MEMBRANE_PROTEIN_INTRACELLULAR_DOMAIN_PROTEOLYSIS		15	0.257859	0.652374	0.895437	0.996662	1	2599	tags=27%, list=22%, signal=34%
GO_N_TERMINAL_PROTEIN_AMINO_ACID_MODIFICATION	GO_N_TERMINAL_PROTEIN_AMINO_ACID_MODIFICATION		21	0.237969	0.652122	0.915074	0.996018	1	147	tags=5%, list=1%, signal=5%
GO_MAIN_AXON	GO_MAIN_AXON		28	0.22222	0.651753	0.936255	0.995407	1	2429	tags=21%, list=21%, signal=27%
GO_REGULATION_OF_ASTROCYTE_DIFFERENTIATION	GO_REGULATION_OF_ASTROCYTE_DIFFERENTIATION		18	0.248779	0.649749	0.928131	0.995585	1	2502	tags=28%, list=22%, signal=35%
GO_CADHERIN_BINDING	GO_CADHERIN_BINDING		17	0.249414	0.64736	0.915058	0.995947	1	2292	tags=24%, list=20%, signal=29%
GO_PERICENTRIOLAR_MATERIAL	GO_PERICENTRIOLAR_MATERIAL		17	0.250444	0.646847	0.917308	0.995391	1	3191	tags=47%, list=28%, signal=65%
GO_NEURON_PROJECTION_TERMINUS	GO_NEURON_PROJECTION_TERMINUS		59	0.191832	0.645413	0.988679	0.995287	1	3487	tags=37%, list=30%, signal=53%
GO_CARDIAC_SEPTUM_MORPHOGENESIS	GO_CARDIAC_SEPTUM_MORPHOGENESIS		26	0.226466	0.645095	0.954724	0.99467	1	938	tags=12%, list=8%, signal=13%
GO_MISFOLDED_OR_INCOMPLETELY_SYNTHESIZED_PROTEIN_CATABOLIC_PROCESS	GO_MISFOLDED_OR_INCOMPLETELY_SYNTHESIZED_PROTEIN_CATABOLIC_PROCESS		16	0.252353	0.63975	0.912727	0.996336	1	2373	tags=25%, list=20%, signal=31%
GO_POLYUBIQUITIN_BINDING	GO_POLYUBIQUITIN_BINDING		35	0.205094	0.639069	0.971374	0.995866	1	2745	tags=29%, list=24%, signal=37%
GO_PROTEIN_LOCALIZATION_TO_CILIUM	GO_PROTEIN_LOCALIZATION_TO_CILIUM		19	0.236196	0.635246	0.934457	0.996715	1	729	tags=11%, list=6%, signal=11%
GO_NLS_BEARING_PROTEIN_IMPORT_INTO_NUCLEUS	GO_NLS_BEARING_PROTEIN_IMPORT_INTO_NUCLEUS		21	0.232774	0.633255	0.943715	0.996786	1	543	tags=10%, list=5%, signal=10%
GO_MATURATION_OF_SSU_RRNA	GO_MATURATION_OF_SSU_RRNA		39	0.200862	0.630639	0.978431	0.997058	1	876	tags=8%, list=8%, signal=8%
GO_ACTIN_NUCLEATION	GO_ACTIN_NUCLEATION		18	0.240347	0.621845	0.935922	0.999609	1	2281	tags=22%, list=20%, signal=28%
GO_SUBSTRATE_ADHESION_DEPENDENT_CELL_SPREADING	GO_SUBSTRATE_ADHESION_DEPENDENT_CELL_SPREADING		22	0.220901	0.621612	0.941176	0.998909	1	3677	tags=50%, list=32%, signal=73%
GO_POSITIVE_REGULATION_OF_DNA_TEMPLATED_TRANSCRIPTION_INITIATION	GO_POSITIVE_REGULATION_OF_DNA_TEMPLATED_TRANSCRIPTION_INITIATION		19	0.226622	0.614271	0.949904	1	1	3657	tags=42%, list=32%, signal=61%
GO_REGULATION_OF_CYCLIC_NUCLEOTIDE_METABOLIC_PROCESS	GO_REGULATION_OF_CYCLIC_NUCLEOTIDE_METABOLIC_PROCESS		60	0.179958	0.61406	0.994297	0.999936	1	1517	tags=10%, list=13%, signal=11%
GO_MATURATION_OF_5_8S_RRNA_FROM_TRICISTRONIC_RRNA_TRANSCRIPT_SSU_RRNA_5_8S_RRNA_LSU_RRNA_	GO_MATURATION_OF_5_8S_RRNA_FROM_TRICISTRONIC_RRNA_TRANSCRIPT_SSU_RRNA_5_8S_RRNA_LSU_RRNA_		18	0.23159	0.613405	0.946463	0.999364	1	1738	tags=17%, list=15%, signal=20%
GO_ACROSOMAL_VESICLE	GO_ACROSOMAL_VESICLE		38	0.192602	0.610489	0.974499	0.999592	1	1458	tags=16%, list=13%, signal=18%
GO_SMALL_SUBUNIT_PROCESSOME	GO_SMALL_SUBUNIT_PROCESSOME		30	0.205737	0.609556	0.972495	0.999107	1	3548	tags=37%, list=31%, signal=53%
GO_EXTRINSIC_COMPONENT_OF_ORGANELLE_MEMBRANE	GO_EXTRINSIC_COMPONENT_OF_ORGANELLE_MEMBRANE		21	0.225893	0.608967	0.951267	0.99851	1	3391	tags=43%, list=29%, signal=60%
GO_BRAIN_MORPHOGENESIS	GO_BRAIN_MORPHOGENESIS		19	0.22833	0.608357	0.961538	0.997947	1	2419	tags=26%, list=21%, signal=33%
GO_REGULATION_OF_TRANSCRIPTION_INITIATION_FROM_RNA_POLYMERASE_II_PROMOTER	GO_REGULATION_OF_TRANSCRIPTION_INITIATION_FROM_RNA_POLYMERASE_II_PROMOTER		18	0.228068	0.604187	0.958175	0.998445	1	2093	tags=22%, list=18%, signal=27%
GO_RIBOSOMAL_SMALL_SUBUNIT_BIOGENESIS	GO_RIBOSOMAL_SMALL_SUBUNIT_BIOGENESIS		53	0.178983	0.599186	0.992523	0.999109	1	876	tags=8%, list=8%, signal=8%
GO_PROTEIN_ACTIVATION_CASCADE	GO_PROTEIN_ACTIVATION_CASCADE		20	0.218781	0.589703	0.966102	1	1	2859	tags=30%, list=25%, signal=40%
GO_MAINTENANCE_OF_PROTEIN_LOCALIZATION_IN_ORGANELLE	GO_MAINTENANCE_OF_PROTEIN_LOCALIZATION_IN_ORGANELLE		22	0.208817	0.58138	0.962151	1	1	3297	tags=36%, list=28%, signal=51%
GO_HORMONE_BINDING	GO_HORMONE_BINDING		23	0.208577	0.581225	0.980695	1	1	2806	tags=22%, list=24%, signal=29%
GO_NCRNA_CATABOLIC_PROCESS	GO_NCRNA_CATABOLIC_PROCESS		18	0.215782	0.579657	0.955854	1	1	2991	tags=33%, list=26%, signal=45%
GO_PEROXISOME_ORGANIZATION	GO_PEROXISOME_ORGANIZATION		28	0.194047	0.574329	0.975238	1	1	3362	tags=36%, list=29%, signal=50%
GO_CENTRIOLAR_SATELLITE	GO_CENTRIOLAR_SATELLITE		17	0.22046	0.574156	0.961255	1	1	4076	tags=53%, list=35%, signal=82%
GO_GLIAL_CELL_DEVELOPMENT	GO_GLIAL_CELL_DEVELOPMENT		43	0.178219	0.573198	0.993865	1	1	3598	tags=35%, list=31%, signal=50%
GO_EMBRYONIC_SKELETAL_SYSTEM_DEVELOPMENT	GO_EMBRYONIC_SKELETAL_SYSTEM_DEVELOPMENT		53	0.170681	0.566028	0.996183	1	1	3820	tags=28%, list=33%, signal=42%
GO_CLEAVAGE_INVOLVED_IN_RRNA_PROCESSING	GO_CLEAVAGE_INVOLVED_IN_RRNA_PROCESSING		18	0.205393	0.556276	0.992278	1	1	1738	tags=17%, list=15%, signal=20%
GO_INTRACILIARY_TRANSPORT_PARTICLE	GO_INTRACILIARY_TRANSPORT_PARTICLE		26	0.189189	0.552729	0.98088	1	1	4034	tags=38%, list=35%, signal=59%
GO_CYTOPLASMIC_MICROTUBULE_ORGANIZATION	GO_CYTOPLASMIC_MICROTUBULE_ORGANIZATION		30	0.18523	0.552518	0.984934	1	1	1344	tags=10%, list=12%, signal=11%
GO_OLIGODENDROCYTE_DEVELOPMENT	GO_OLIGODENDROCYTE_DEVELOPMENT		19	0.207922	0.552153	0.972387	1	1	3811	tags=47%, list=33%, signal=70%
GO_LYSOPHOSPHOLIPID_ACYLTRANSFERASE_ACTIVITY	GO_LYSOPHOSPHOLIPID_ACYLTRANSFERASE_ACTIVITY		16	0.216812	0.549329	0.966797	0.999739	1	9071	tags=100%, list=78%, signal=461%
GO_INNER_MITOCHONDRIAL_MEMBRANE_ORGANIZATION	GO_INNER_MITOCHONDRIAL_MEMBRANE_ORGANIZATION		16	0.212488	0.549025	0.975258	0.999016	1	4184	tags=44%, list=36%, signal=68%
GO_OXIDOREDUCTASE_ACTIVITY_ACTING_ON_THE_CH_NH_GROUP_OF_DONORS_NAD_OR_NADP_AS_ACCEPTOR	GO_OXIDOREDUCTASE_ACTIVITY_ACTING_ON_THE_CH_NH_GROUP_OF_DONORS_NAD_OR_NADP_AS_ACCEPTOR		15	0.218583	0.548354	0.963035	0.998361	1	4442	tags=47%, list=38%, signal=76%
GO_MEMBRANE_PROTEIN_ECTODOMAIN_PROTEOLYSIS	GO_MEMBRANE_PROTEIN_ECTODOMAIN_PROTEOLYSIS		18	0.205754	0.538094	0.980276	0.999027	1	289	tags=6%, list=2%, signal=6%
GO_NEGATIVE_REGULATION_OF_EPITHELIAL_CELL_MIGRATION	GO_NEGATIVE_REGULATION_OF_EPITHELIAL_CELL_MIGRATION		25	0.187978	0.528905	0.990584	0.999448	1	4002	tags=44%, list=35%, signal=67%
GO_NUCLEOTIDE_BINDING_DOMAIN_LEUCINE_RICH_REPEAT_CONTAINING_RECEPTOR_SIGNALING_PATHWAY	GO_NUCLEOTIDE_BINDING_DOMAIN_LEUCINE_RICH_REPEAT_CONTAINING_RECEPTOR_SIGNALING_PATHWAY		26	0.178955	0.527416	0.992032	0.998843	1	3730	tags=38%, list=32%, signal=57%
GO_MATURATION_OF_SSU_RRNA_FROM_TRICISTRONIC_RRNA_TRANSCRIPT_SSU_RRNA_5_8S_RRNA_LSU_RRNA_	GO_MATURATION_OF_SSU_RRNA_FROM_TRICISTRONIC_RRNA_TRANSCRIPT_SSU_RRNA_5_8S_RRNA_LSU_RRNA_		32	0.168426	0.513775	0.990177	0.99946	1	876	tags=6%, list=8%, signal=7%
GO_NUCLEOTIDE_TRANSMEMBRANE_TRANSPORTER_ACTIVITY	GO_NUCLEOTIDE_TRANSMEMBRANE_TRANSPORTER_ACTIVITY		17	0.197961	0.512924	0.986111	0.99878	1	2712	tags=24%, list=23%, signal=31%
GO_REGULATION_OF_ANDROGEN_RECEPTOR_SIGNALING_PATHWAY	GO_REGULATION_OF_ANDROGEN_RECEPTOR_SIGNALING_PATHWAY		17	0.19674	0.51119	0.977316	0.99817	1	2994	tags=29%, list=26%, signal=40%
GO_NEUROPEPTIDE_SIGNALING_PATHWAY	GO_NEUROPEPTIDE_SIGNALING_PATHWAY		22	0.174972	0.48761	0.99807	0.999217	1	1458	tags=9%, list=13%, signal=10%
GO_REGULATION_OF_POTASSIUM_ION_TRANSMEMBRANE_TRANSPORT	GO_REGULATION_OF_POTASSIUM_ION_TRANSMEMBRANE_TRANSPORT		21	0.165567	0.451043	0.998058	1	1	2206	tags=19%, list=19%, signal=23%
GO_EMBRYONIC_SKELETAL_SYSTEM_MORPHOGENESIS	GO_EMBRYONIC_SKELETAL_SYSTEM_MORPHOGENESIS		38	0.14045	0.438718	1	0.999789	1	3820	tags=29%, list=33%, signal=43%
GO_PHOSPHATIDYLINOSITOL_3_KINASE_COMPLEX	GO_PHOSPHATIDYLINOSITOL_3_KINASE_COMPLEX		18	0.154831	0.409474	1	0.99959	1	9788	tags=100%, list=85%, signal=646%
