# Supplementary material for: Integration of genomics and transcriptomics predicts diabetic retinopathy susceptibility genes
Source: eLife. 2020 Nov 9;9:e59980. doi: 10.7554/eLife.59980 (PMC7728435; doi:10.7554/eLife.59980)
Supplement: Figure 1—source data 6. [file elife-59980-fig1-data6.csv]

ID	geneSymbol	geneName	logFC	AveExpr	t	P.Value	adj.P.Val	B
fSUyR.vR7Xu0iR4nUU	TXNIP	thioredoxin interacting protein	0.223408848835965	9.54179251224988	8.41532681844788	3.24229744926821e-12	5.04760866902074e-08	17.2388614951818
33obrCQopAnZlAmA1Y	HIST1H2AC	histone cluster 1 H2A family member c	0.155754372817463	8.29446097407529	6.81856568260801	2.72044337009325e-09	2.11759311928059e-05	10.9609069976679
B.MnES5zlIlJgt51ZU	HIST1H2BJ	histone cluster 1 H2B family member j	0.164282757771585	7.67418155407776	6.49507448944174	1.04306433056992e-08	5.41280849943748e-05	9.70444229712113
Ebfrl.7uOZfnjp_E7k	EGR1	early growth response 1	-0.164158985749391	9.28585023406424	-6.35424467838913	1.8648661437599e-08	6.26288967164598e-05	9.16117324653682
iSYLWdWZUIKnYICW4c	HIST1H2BK	histone cluster 1 H2B family member k	0.161397931008424	9.91457821920761	6.27844234399841	2.54660783136639e-08	6.26288967164598e-05	8.8698525184474
oB.usjxziFJJd51SUk	CCL4L1	C-C motif chemokine ligand 4 like 1	-0.172079024579632	9.92658290395234	-6.25466698396919	2.80754001302327e-08	6.26288967164598e-05	8.77864875808617
0t7nhVLii6tSAxtLhc	CCL3L1	C-C motif chemokine ligand 3 like 1	-0.131574113696468	9.94226173896393	-6.242523918553	2.95085804440276e-08	6.26288967164598e-05	8.73209924067556
B13ku4.JFejVTQUv_k	MAPKAP1	mitogen-activated protein kinase associated protein 1	0.112080081813978	7.66028658216327	6.2213474264124	3.21834001626207e-08	6.26288967164598e-05	8.65097337636149
xZHfxp9rpwp15_eR3w	HIST1H4H	histone cluster 1 H4 family member h	0.139357366689326	7.47706176211924	5.97587796584781	8.75136507329501e-08	0.000151379168290063	7.71583485380084
0Uu3XrB6Bd14qoNeuc	ZFP36	ZFP36 ring finger protein	-0.111666537596816	10.1226447988977	-5.94791048058019	9.80119520243175e-08	0.000152585006911457	7.60994772412535
ZKTWWVbtk16DAO6d6Q	ADAP1	ArfGAP with dual PH domains 1	-0.0767623850374713	10.3136010726612	-5.8041790972714	1.75028528586427e-07	0.000247713103003044	7.06810418679963
Hc1Lx5a.gDOXkN4lLk	IFNG	interferon gamma	-0.165737187298463	5.59865075923793	-5.65553019809904	3.17401816658865e-07	0.000349009056840088	6.51213239763851
ueQUrXd5FH554RlhZc	CCL3L1	C-C motif chemokine ligand 3 like 1	-0.116019783723903	10.9351906860497	-5.6472326479972	3.28078046125946e-07	0.000349009056840088	6.48123884581383
iSOGEH1_5Uya6ieX6Q	LAMP2	lysosomal associated membrane protein 2	0.0732648018784828	8.47396591219127	5.64595807446036	3.29749073540876e-07	0.000349009056840088	6.47649469696721
i7o1RUDUHTXr_eRHr0	HIST1H2BD	histone cluster 1 H2B family member d	0.105009898013801	9.39750336800586	5.64104036992252	3.36275427325367e-07	0.000349009056840088	6.45819368874585
xXQSlSoqC7iZfrOHwA	IRF1	interferon regulatory factor 1	-0.069383125867397	9.56772079995519	-5.51884526803776	5.46276797852774e-07	0.000531527324310749	6.00523272763799
0Tm7hdRJxd9zoevPlA	CCL3L3	C-C motif chemokine ligand 3 like 3	-0.0980418910508677	12.0306825696692	-5.30817402150381	1.25019121103809e-06	0.00104005185352869	5.23289377069253
KWT26oiJsiv1qSw9zU	HIST1H3G	histone cluster 1 H3 family member g	0.146423700226764	5.96336488872881	5.30657703567455	1.25800695320924e-06	0.00104005185352869	5.22708326513869
ircfyu5nq3eud9Hvl4	TUBB2B	tubulin beta 2B class IIb	-0.186822620348129	10.1464481861802	-5.30427988625309	1.26933358280094e-06	0.00104005185352869	5.21872648177283
fpUkkSiqaGvJ.oADh8	GPR55	G protein-coupled receptor 55	0.138801743736794	6.80303112441833	5.28640351069803	1.36096775775463e-06	0.00105937730263621	5.15374317638841
HhecR84SAQucRJ7rVE	JCHAIN	joining chain of multimeric IgA and IgM	-0.121347327048552	11.8216524687707	-5.25802711332777	1.51992948253075e-06	0.00112677438971613	5.05077070634767
BiIggjgv5SipUz.9J4	EGR3	early growth response 3	-0.187737929902932	5.30763250870629	-5.17144105287565	2.12624950378599e-06	0.00142565713094063	4.73796378841354
uihtWnqOC3rrq2wvyg	IER3	immediate early response 3	-0.117450018933061	9.24243678825204	-5.16652741591244	2.16700576290352e-06	0.00142565713094063	4.72027686051824
fKVEOXu10U8tW5JeCE	VPREB3	pre-B lymphocyte 3	-0.299947319985466	7.29657653012648	-5.1628713789582	2.19782702611608e-06	0.00142565713094063	4.70712130134312
WVHqq_qwz3utdJXsXw	HIST1H2BK	histone cluster 1 H2B family member k	0.0991404583434855	12.20812737453	5.1344351215119	2.45268406080485e-06	0.0015086927105904	4.60493253222844
05Tpl.rWQjP30Rn1QE	CHRNA5	cholinergic receptor nicotinic alpha 5 subunit	0.110345914515886	6.24083915536541	5.12744345238724	2.51965637688531e-06	0.0015086927105904	4.57984375255057
uuolsd.lfeeO3N07e4	PIGC	phosphatidylinositol glycan anchor biosynthesis class C	0.0820376502380061	7.85854648244662	5.11563131031796	2.63689843581161e-06	0.00152041610550797	4.53749030075267
iJedp7O.dkZ0Vn0uac	HELZ2	helicase with zinc finger 2	-0.0770687636678724	9.38922547701802	-5.00786116230443	3.98539116253019e-06	0.00221587748636679	4.15302821492392
i3nlIqhAhuR0F9xSlE	RGCC	regulator of cell cycle	-0.103674385668932	7.59395425207533	-4.98458761530142	4.3551870089767e-06	0.00229569718479037	4.07047566375137
iqkpERF1ZSdQ.5H.1c	PDRG1	p53 and DNA damage regulated 1	0.0858640324435353	7.32421426432108	4.98047848153885	4.42387689772039e-06	0.00229569718479037	4.05591821761071
0hLjntvRWEBHh9xNro	H2AFY	H2A histone family member Y	-0.0924602958082284	5.92846819848403	-4.95658685925836	4.84476427774639e-06	0.00243300936374051	3.97138442820837
lW4AaJ4EMp71TslV6U	TNF	tumor necrosis factor	-0.0978815906440517	9.73615134385539	-4.93648783750499	5.22897112674637e-06	0.00254389445316211	3.90041241463404
0DJ9t0v1UAqsVKVdd4	HVCN1	hydrogen voltage gated channel 1	-0.0802052919938422	8.78696608619603	-4.90680373933445	5.85144980689251e-06	0.00276046577556675	3.79583570903184
3k.6CetJySv96jtqIU	MYLIP	myosin regulatory light chain interacting protein	-0.106384070392673	8.86539419435577	-4.89356990781729	6.15178282422733e-06	0.00281679279434033	3.74930676728245
fadTvoHtugqBglTIXo	FAH	fumarylacetoacetate hydrolase	0.102592080899786	7.18716584951842	4.87874597182747	6.50610500622294e-06	0.00289391550676796	3.69725638765262
WlysSDwyV8kGHnnruw	IRF2BPL	interferon regulatory factor 2 binding protein like	-0.0881476449492308	8.82596201093401	-4.87126072234131	6.69251737155528e-06	0.00289414195667702	3.67100183562858
BRK4e4BI5V635.TR3I	MGEA5	meningioma expressed antigen 5 (hyaluronidase)	0.0691861977830774	10.6466146429496	4.82491328911868	7.96847600024272e-06	0.00326547342631864	3.50885997866546
Wivj4OlfbjC0nuHtKk	HSPA6	heat shock protein family A (Hsp70) member 6	-0.114963682654543	6.41687686697531	-4.8248387352218	7.9707085174787e-06	0.00326547342631864	3.50859974957477
unWn11HnghXnsieCeA	ESPNL	espin-like	-0.102909144017013	6.23579074756142	-4.81501510305441	8.27028129260146e-06	0.00330132664521076	3.47432725748784
EWX22SIXfnq.QQG5T4	ITM2A	integral membrane protein 2A	0.06675287733877	10.4705336885129	4.80211169712361	8.68051908208289e-06	0.00337845802674666	3.4293607331973
ZqygilO.S9v93sq2Pg	GCNT1	glucosaminyl (N-acetyl) transferase 1, core 2	-0.101997779533087	6.32339517519602	-4.7832572978009	9.31588368516247e-06	0.00353730920025876	3.3637598609646
xbRJ.Xq__Jdwjrf9d4	TYMSOS	TYMS opposite strand	0.078904952596949	7.98655465254954	4.77334399315833	9.66792265174308e-06	0.00358357666291277	3.32931795207802
Z9Yi7krpX1X6KYgiIM	SLC1A4	solute carrier family 1 member 4	0.0903776676078065	6.69245493969531	4.75598073931518	1.03160467164377e-05	0.00372062142551869	3.26907596518642
c_GGiCNf6OSIlJCimk	DNAJC3	DnaJ heat shock protein family (Hsp40) member C3	-0.0974618944167752	6.71430268133199	-4.74824164112616	1.06184024857497e-05	0.00372062142551869	3.24225946073503
0FCogUoBoBIutPVSVo	DDIT3	DNA damage inducible transcript 3	-0.11939022794575	7.08457526460039	-4.74482493047683	1.07546225686242e-05	0.00372062142551869	3.23042709810853
HTYOumrwHsefC6JpxY	PARP15	poly(ADP-ribose) polymerase family member 15	-0.0959725725245918	7.49002586894683	-4.73839615510116	1.10155648215537e-05	0.00372805028569453	3.20817497368221
N66ifui2jRsXuSAWXc	C7orf50	chromosome 7 open reading frame 50	0.0527076149335782	11.3115735755835	4.73125379392237	1.13127125472258e-05	0.00374715550925983	3.18347020583256
oUL016nU_reU_ae0_Y	IFI27	interferon alpha inducible protein 27	-0.144482340971814	6.41331356672567	-4.72180813919148	1.17177119122e-05	0.00376114787377397	3.15082664131427
fIU.eS.lQF3Hv6hLCU	SLC38A9	solute carrier family 38 member 9	0.0901835654761006	6.34380350867495	4.71906066034258	1.18381452861591e-05	0.00376114787377397	3.1413375558333
WXeRTp3eQUvd5NH554	CCL3	C-C motif chemokine ligand 3	-0.0975530567296309	11.3042995317746	-4.70383770011155	1.25276126219724e-05	0.00390059746597732	3.08881073735598
NgVSgCgitgUFeaCiTo	SIRPA	signal regulatory protein alpha	-0.165493302470932	6.84875196774215	-4.6894046811931	1.32173561115418e-05	0.00403466274400947	3.03908722956561
uk0mLmEu_m6O9.Y6x4	SPACA6	sperm acrosome associated 6	-0.128776691591648	4.90376764556816	-4.67553007766388	1.39152231359547e-05	0.00416600372654891	2.99135921032387
03R393nvkDE6MEW8PU	CCL4L2	C-C motif chemokine ligand 4 like 2	-0.140111905787173	8.63746975508339	-4.65868537975087	1.4810825680825e-05	0.00435047045658647	2.93350926160964
ogoZKSQIstLV9_neeE	CCL3L1	C-C motif chemokine ligand 3 like 1	-0.148240186441717	8.6182535776809	-4.65121901727758	1.52255275528262e-05	0.004389463202637	2.90790097553639
KU7r4Pkh7qKSruInh0	SP140	SP140 nuclear body protein	-0.0969859630646846	8.30830640531099	-4.64406213863847	1.56336417813278e-05	0.00442517336821293	2.88337358592489
0lEaClSj.T6eFZ3DOw	HACL1	2-hydroxyacyl-CoA lyase 1	0.0558365837373031	9.21928037633443	4.62022157425083	1.70714250860472e-05	0.00474585617392112	2.80180732732477
34R05QQgXuVdfXBeKU	CD72	CD72 molecule	-0.132922469651692	6.15863700505383	-4.6125466424328	1.75610897069496e-05	0.00479633411504897	2.77559430146067
rfgpce01ECdf.xqTVM	SP110	SP110 nuclear body protein	-0.0995011574937713	6.42017812883785	-4.59187208398182	1.89491236052278e-05	0.00506810808749343	2.70509305849512
BdXlXor7fQnuh96j_Q	DUSP5	dual specificity phosphatase 5	-0.0727314591054618	10.279732305684	-4.58819053477425	1.92072441650894e-05	0.00506810808749343	2.69255582904852
cFS454rTueg57P6FEQ	LPIN1	lipin 1	0.0790285195818415	9.54681324228234	4.58227642881402	1.9629069720629e-05	0.00509308929017919	2.67242662658795
Z0Hop0gnoM00rTEkjo	NUCB2	nucleobindin 2	-0.0987426227670478	7.86555466932457	-4.57347909060639	2.02732592881594e-05	0.00514339863697462	2.64250883104728
Wc8GcY5eBcULedeVQI	HIST1H2BD	histone cluster 1 H2B family member d	0.0997139539431917	8.5187933723928	4.57066364870481	2.0483730440161e-05	0.00514339863697462	2.63294040641166
idTUjrosWZITwC07AI	MIR22HG	MIR22 host gene	-0.118898559754211	6.14952434716369	-4.5545276521116	2.17316043911376e-05	0.00537012090732112	2.57816025109325
cIlURopN5FdjglQwF0	LTA	lymphotoxin alpha	-0.0911714409888867	12.2226009637954	-4.51045587663005	2.55283468654869e-05	0.00617024338099839	2.42905612469783
3NpGp3qdVuiIJ7L.xQ	GRAMD4	GRAM domain containing 4	-0.0955163528177729	5.6007368636996	-4.50795410849388	2.5762192944816e-05	0.00617024338099839	2.42061494188375
rdd9atbqYt9NwqFCMc	KRT10	keratin 10	0.0755866703774047	8.80801984128813	4.48934431153295	2.75682038600244e-05	0.00643214665834811	2.35790154449641
rUAeoKULEt3uubPhhU	RAB30	RAB30, member RAS oncogene family	-0.0986758583210842	7.38039315706445	-4.48821143178991	2.76820289124694e-05	0.00643214665834811	2.35408827370043
TnqJL5KUS4Lu_fe0fw	TRAPPC2	trafficking protein particle complex 2	0.0688177629823894	8.82109186366888	4.4682962042296	2.97591292100768e-05	0.00681309005209524	2.28713724418019
EkgiAodLu41r9._dlU	DUSP1	dual specificity phosphatase 1	-0.106860071958538	7.35718318001474	-4.45578966488347	3.11400398004113e-05	0.00702591506685221	2.24517397702844
cRUpDfl96.fUlE_If0	FHL2	four and a half LIM domains 2	0.107977206420384	5.99712480949819	4.41879812164378	3.55983411305856e-05	0.00783490263551632	2.12142632695938
osUOrmeQ1ISw95AeX4	SRGN	serglycin	-0.0911576832799625	12.8321566088026	-4.41117771364992	3.65907989281995e-05	0.00783490263551632	2.09600309863559
Q95pe.1JIr0pXe68CE	TCTEX1D2	Tctex1 domain containing 2	0.0995551850830503	6.80025843549122	4.410307988982	3.67057606409444e-05	0.00783490263551632	2.09310303484952
96ltV3Vfr3ke_UMAJ0	FOSB	FosB proto-oncogene, AP-1 transcription factor subunit	-0.161288145723635	7.19760685731295	-4.41005937001787	3.67386878463959e-05	0.00783490263551632	2.09227408146799
WhfFzz6I69E9fFeVf4	C8orf33	chromosome 8 open reading frame 33	0.0677246990033126	8.26904621644743	4.397757051791	3.84042754771775e-05	0.00797664818951367	2.05128705440123
oTumkikiOouOaGhEBw	F2RL3	F2R like thrombin/trypsin receptor 3	0.158349312538729	4.89201664862023	4.39758488108619	3.84280970075492e-05	0.00797664818951367	2.05071388428154
36HqUBcKuCun2qtuug	NCL	nucleolin	0.10228869265328	8.91384945579965	4.38728529399621	3.98795061065029e-05	0.00816900198771101	2.01644802174817
Zt6SoeDheO0j8j316o	GLS	glutaminase	0.0804922166900591	8.37533708181043	4.37104022394233	4.22773479390648e-05	0.00854771107422547	1.96249147925224
QWq7Z1IXOOH7yUCHlE	GDF15	growth differentiation factor 15	-0.174239484860234	6.28320235597382	-4.35597395470573	4.46256634063229e-05	0.00890682471679019	1.91254861339862
ouy5EZGrv3u5y_ffnk	MYADM	myeloid associated differentiation marker	-0.110136643639488	8.4952352441923	-4.34790573571214	4.59346774692478e-05	0.00897438310822075	1.88584257710486
raSShE1lJOVCd9eReg	MSL3	male-specific lethal 3 homolog (Drosophila)	0.0894015923314518	7.12136288231712	4.34583733300296	4.62762056452087e-05	0.00897438310822075	1.8790005157462
04.BQghp5olySHSl7o	PRKCB	protein kinase C beta	-0.0710200207859748	11.0408603376608	-4.3412532098167	4.70419095752152e-05	0.00897438310822075	1.8638431405686
rlnUn_Rv2NUClf.Klg	HIST2H4A	histone cluster 2 H4 family member a	0.0964393878023814	6.27242892530027	4.33990161916528	4.72700035248009e-05	0.00897438310822075	1.85937580726884
uEkIk7u5R9VxVBuAF0	RASSF7	Ras association domain family member 7	0.0526053257660167	9.07911604547115	4.33341874396298	4.83790231024938e-05	0.00904230612350803	1.83795907513947
iohEwXY.31lNacDLVM	RPS26	ribosomal protein S26	0.106385446496513	5.36982029731922	4.33105614405366	4.87894215297196e-05	0.00904230612350803	1.83015844753372
0evfS558c.6wepf36o	LMBRD1	LMBR1 domain containing 1	0.0681764719229537	9.81426185865751	4.31443379256687	5.17736168762797e-05	0.00948249020623438	1.77534322332493
6KhTnqXeZd7EFHnWB0	SLC22A18	solute carrier family 22 member 18	-0.0992423560199862	5.60557484590784	-4.30586088327089	5.33810078834378e-05	0.00959546083188268	1.74711853296992
Z994OdWBx4f4IrJdeU	PDE4B	phosphodiesterase 4B	-0.0687549821024244	8.04284019723761	-4.30459117297049	5.36231431380905e-05	0.00959546083188268	1.74294092361392
xPvRLS8SNgdfvcd.VU	RNY1	RNA, Ro-associated Y1	0.111117806058581	6.77468874341416	4.28643160868913	5.72046873263647e-05	0.010120029230646	1.68326794103634
TASKea9AhURGRCFa54	PTP4A3	protein tyrosine phosphatase type IVA, member 3	-0.100920041931868	6.26599500946488	-4.28319015952676	5.78678741169383e-05	0.0101223265646348	1.67263135747872
rSd7BdW_bQtwFCPO4c	FHL2	four and a half LIM domains 2	0.0903163892294002	7.18028182361049	4.27932203254375	5.8669012753502e-05	0.0101484354505169	1.65994431583561
NgY5btS.mC1z1XXXtk	C1orf54	chromosome 1 open reading frame 54	-0.0976674790843621	6.9062173889411	-4.268221451456	6.10281053211952e-05	0.0104405004795645	1.62357157760169
QVzg5Li7oIl9LSJ0Bc	ZNF165	zinc finger protein 165	-0.0771636560531443	6.32883667938133	-4.2588454510365	6.30919231304264e-05	0.0106229340777291	1.59289139047984
WiDkyye2kiigUg3dQI	CCM2	CCM2 scaffolding protein	0.0962089621527679	6.17840364827063	4.25720802822498	6.3459202802467e-05	0.0106229340777291	1.58753733706012
xU3nwV_nUUwpHqHaP0	GSTK1	glutathione S-transferase kappa 1	-0.0433971608501662	9.72976109044638	-4.25050462178012	6.49844702691154e-05	0.0107625343952084	1.56563071179386
KVVEd_dLe0XvS3nx0c	FBXL20	F-box and leucine rich repeat protein 20	0.0781759825220612	6.68001847112334	4.24689501490043	6.5820404399473e-05	0.0107862321651684	1.55384271414076
inreqMnokfHSunrgOE	ERP29	endoplasmic reticulum protein 29	-0.0449996182396243	11.8055103826369	-4.23106541091088	6.96106681699496e-05	0.0112885300215602	1.50221503199434
NICr.zoUOVS_0tIlvo	SGK1	serum/glucocorticoid regulated kinase 1	-0.115669702258327	7.65124894933482	-4.20538586927966	7.62120592748664e-05	0.0122316426679497	1.418697363459
EafR6Ev9fIKy.7uHuE	ACTR6	ARP6 actin-related protein 6 homolog	0.0589329675363017	8.7998845121556	4.19910788893249	7.79156651855121e-05	0.0123774599551842	1.39832401065489
0PHsTIiErqT.6nF69s	KLF2	Kruppel like factor 2	-0.104636547714958	9.24622392150152	-4.19273150167612	7.96835934518273e-05	0.0125304462914954	1.37764931019585
9oEnnFVCH5RvveV0jo	NFYC	nuclear transcription factor Y subunit gamma	0.0669492155103795	7.46550551966288	4.16254125611768	8.85935050120815e-05	0.013704099452649	1.2800085759271
EFd1I5S1WJleSWleHc	IRF7	interferon regulatory factor 7	-0.104444332077228	6.02198782257635	-4.16153119271442	8.89076339104287e-05	0.013704099452649	1.2767489509506
0vm6uk4vggpAp_wPxU	NR4A2	nuclear receptor subfamily 4 group A member 2	-0.14096624510773	5.89453908609311	-4.14591868968742	9.39019613024923e-05	0.014306202975817	1.2264239216352
QV59WEUl06DOQQdexU	SHISA5	shisa family member 5	-0.0601552833231677	9.2425942296226	-4.14294662067116	9.48828878706623e-05	0.014306202975817	1.21685636840787
3eV9Urj3sL7V0Hsfog	AGK	acylglycerol kinase	-0.0549934585616699	8.80565379359123	-4.14088018351782	9.55707290265269e-05	0.014306202975817	1.21020655790137
cVLhH0iJ6y8sk74lKU	FOS	Fos proto-oncogene, AP-1 transcription factor subunit	-0.15181043042887	8.4984120051893	-4.13454945887137	9.77080605479319e-05	0.0143770836695954	1.18984636921809
ccp.nyzTtTv19F0uic	NUSAP1	nucleolar and spindle associated protein 1	0.0504541828921245	10.6498907319867	4.13192329432332	9.860814825563e-05	0.0143770836695954	1.18140575949461
Tpd7ZHBnduvnYe_ze4	TRIB1	tribbles pseudokinase 1	-0.0798127759430082	9.35516005640201	-4.12966270776262	9.93893370037984e-05	0.0143770836695954	1.17414266167837
Kk7UdUhjpQiSARCeiU	TCEB2	transcription elongation factor B subunit 2	0.0935916074591487	5.3482522359538	4.12865856818023	9.97382474509443e-05	0.0143770836695954	1.17091718603986
03_TFU7fVS_1Xov6qg	SELENOW	selenoprotein W	-0.0916409695013043	7.03643486858048	-4.12234795743785	0.000101958193381892	0.0144443100290733	1.15065696130815
cQn9tLpBR3ykkkHr.o	AKIRIN2	akirin 2	0.0566638457542259	9.62262136002649	4.1220610137507	0.000102060258427419	0.0144443100290733	1.14973616266551
QSR_4KPg5K9SuioIbo	ABCG1	ATP binding cassette subfamily G member 1	-0.111141821246814	6.47159588308503	-4.11722699071714	0.000103794585593968	0.0145574244011431	1.13422953354528
TdRf7_R3vl7iif3pO4	ZAK	sterile alpha motif and leucine zipper containing kinase AZK	0.0671434690394328	8.02711989109184	4.10742563452304	0.000107398679491385	0.0149284164493025	1.10282167063297
cgCe7bvV7gHiSu7vpk	ABLIM1	actin binding LIM protein 1	0.0813212686874438	8.28687693512372	4.09938901307411	0.000110443563154179	0.0152157999219846	1.07710189650175
HuOOYeKPOQbrUFomlI	MBD6	methyl-CpG binding domain protein 6	-0.0956828605020833	7.7663912776901	-4.09379537104031	0.000112611777640766	0.015326751688975	1.05921809807857
f5ETr9Qq311wP1KpdU	GAD1	glutamate decarboxylase 1	0.0943519141288327	5.07846164490691	4.09225019993199	0.000113217911371539	0.015326751688975	1.05428048975108
WdLoqLs6F6VTp.k7yI	METTL13	methyltransferase like 13	0.060639307742853	7.43502597372506	4.08386130846618	0.000116563919795245	0.0156436819256238	1.02749308221343
oJVKJUv0Ol_e7rv0Lk	TMOD1	tropomodulin 1	0.0684489342521312	8.3522437259582	4.08030445081741	0.000118011190101976	0.0157025487821159	1.01614521774271
0nhwoprp398E9UblSo	CABLES1	Cdk5 and Abl enzyme substrate 1	0.0581293060522756	8.50538749248409	4.07727273976646	0.000119258429637192	0.0157340273948458	1.00647745010204
0UuayX_1fTl.Q94uoo	JADE3	jade family PHD finger 3	0.0878405312134161	6.82130770385859	4.07332880452185	0.000120899967251476	0.0158165604216048	0.993907133306366
9kJvkoOp_klOJfPotM	PLA2G16	phospholipase A2 group XVI	-0.0861355070136685	8.09205802279754	-4.06725198163353	0.000123471918661562	0.0160184235810266	0.97455301117772
TpnrGwMhQ5Lyunf1CE	OAS3	2'-5'-oligoadenylate synthetase 3	-0.0935661510982438	9.30595336578251	-4.0614437238427	0.000125979391296963	0.0162086542455465	0.956070424965733
Nu3z03e73y5Il6Vnvo	DCAKD	dephospho-CoA kinase domain containing	0.0542709073822016	9.39500931328023	4.05901216336201	0.000127043610544529	0.0162115977783379	0.948337606829496
KeK0qLnp0SxJO5fDn0	RASSF1	Ras association domain family member 1	0.0633635899942113	7.78342283119438	4.05476322156902	0.000128924050068776	0.0162956284633326	0.93483185064951
BorV5S78giXh7vS5fo	WFS1	wolframin ER transmembrane glycoprotein	-0.0899209469803842	6.65686411923269	-4.05281410364905	0.000129795601840522	0.0162956284633326	0.928639196388677
fi4rrDS5d_v0lutcuk	GYPE	glycophorin E (MNS blood group)	0.104122611060076	5.11549643202664	4.04983777854781	0.000131137422329434	0.016332379126597	0.919186398282958
QDxzvalteTded2uVlo	CYBA	cytochrome b-245 alpha chain	-0.0478836815545161	10.6280464345972	-4.0470049776452	0.000132426931941362	0.0163620831465327	0.910193314531358
0B2unl2eOJ63mNeDqo	IFI6	interferon alpha inducible protein 6	-0.0988691342390891	9.32025107636227	-4.0435035319561	0.000134037683004083	0.0164306980236816	0.899082771549414
umiL0YHuVBk7zJSrXE	TNS3	tensin 3	-0.0991976359158274	5.95949677800181	-4.03264186445076	0.000139155159798083	0.0169247463104418	0.864654207703205
lU36pJSlfl9P.EiskQ	SIK1	salt inducible kinase 1	-0.0897055118031082	5.49460627680493	-4.02817463283378	0.000141314004194603	0.0170540807542758	0.850510528516256
BSH4ALru6_He.dlO30	RPL39L	ribosomal protein L39 like	0.0658881055299161	8.96910248370646	4.02250842736217	0.000144098649720612	0.0172563675296191	0.832584438851095
xqBV_4k50s0_6IFCKk	EWSR1	EWS RNA binding protein 1	0.0481800900573059	10.1196158936415	4.01790824225698	0.000146398148148708	0.0172705289835603	0.818042152986998
WSntNQgebC77nSzVCo	MTCP1	mature T-cell proliferation 1	0.0555042593865453	9.58957613949618	4.01160218775688	0.000149607778240799	0.0172705289835603	0.798123623137429
fX7oznu4Ftu4u6zl40	SGK1	serum/glucocorticoid regulated kinase 1	-0.0953979516341112	7.22594735327531	-4.01156294516491	0.000149627962061626	0.0172705289835603	0.797999729598084
TiB6joGUXecfXl7tF4	NR4A3	nuclear receptor subfamily 4 group A member 3	-0.156321110045078	4.41283159426403	-4.01069571452579	0.000150074677660323	0.0172705289835603	0.795261967189893
onsnvop.hKDoejReHU	HERPUD1	homocysteine inducible ER protein with ubiquitin like domain 1	-0.0809950109748696	10.0099576756792	-4.00629633284668	0.000152360650727045	0.0172705289835603	0.781379095540473
9nXuF7Sp4fRd503S.U	QPRT	quinolinate phosphoribosyltransferase	-0.0885975590227224	9.83014493418279	-4.00567020962038	0.000152688701225218	0.0172705289835603	0.779404028851405
ThH5Ek6d5dEOOS0lF4	CTSZ	cathepsin Z	-0.139646908354598	9.72530036487066	-4.00338894518065	0.000153889699430447	0.0172705289835603	0.772209512632111
Wd1HeXTd7GD_rVJfvo	RAE1	ribonucleic acid export 1	0.047639474265629	8.433595744639	4.00107222021534	0.000155118658909898	0.0172705289835603	0.764905718780073
EfeUo_wv14pdVLXmgc	CLDN14	claudin 14	0.0723463822704166	7.34622314978076	3.99985681072586	0.000155767168468353	0.0172705289835603	0.761075004007061
TqWXGFoGoFCb8OCEN0	LAMTOR2	late endosomal/lysosomal adaptor, MAPK and MTOR activator 2	0.0469401211408518	8.97532946162814	3.99553324084724	0.00015809530114579	0.0172705289835603	0.747453777217075
feTnq95EnpdWb6kE_c	ITGAX	integrin subunit alpha X	-0.173737249091578	5.31267810024844	-3.99529981971184	0.00015822193953313	0.0172705289835603	0.746718649450004
lOVVIjl.LsLJ6fqs0k	ATPAF1	ATP synthase mitochondrial F1 complex assembly factor 1	0.0536393477166804	9.48796490163409	3.99441628211267	0.000158702170418027	0.0172705289835603	0.743936306757762
fpfV7SCqvukAlE8Qnk	GRN	granulin	-0.0879105110705762	8.82880191452123	-3.99113123190072	0.000160500018321273	0.0172705289835603	0.733594672813955
WqCXobedHojhG5uq74	SNHG7	small nucleolar RNA host gene 7	0.0762538289404925	8.6511696098239	3.99071987480944	0.000160726520887126	0.0172705289835603	0.7323000499309
lBLUXe7cU4VX10R4Xs	HLA-E	major histocompatibility complex, class I, E	-0.0492702605595783	11.8018538820548	-3.98944950200181	0.000161427958107734	0.0172705289835603	0.728302448066856
cOTVIVWO272Qk1ySX0	AK2	adenylate kinase 2	0.0453224637815526	10.239737482226	3.98847742473191	0.000161966677261035	0.0172705289835603	0.725244046479139
obsJQeIxbjrvj9.Q44	ATP2B1	ATPase plasma membrane Ca2+ transporting 1	-0.0778226760713466	5.92398915033992	-3.97365350968592	0.000170399189161394	0.0180460855569019	0.678660825076482
TGtKt9_YVpWdSNVEnc	UNC93B1	unc-93 homolog B1 (C. elegans)	0.0639036990565365	7.9448611914776	3.96620530472501	0.000174793715518955	0.0183864092108047	0.655295500019715
Q4dLhS5e4k6pSgLesM	MC1R	melanocortin 1 receptor	0.099780341832885	5.03954724875744	3.95276414429798	0.000183001102449079	0.0191205447176326	0.613198343560974
0u9eiDuPahktFxFiRk	HIST2H4B	histone cluster 2 H4 family member b	0.0895319778458156	6.0939826218618	3.94562642638121	0.000187508673136838	0.0194609001559619	0.590879165474226
TkrTkRL.jAqSwQs_qU	RHOB	ras homolog family member B	-0.1084640959776	5.51949496421877	-3.94091398563836	0.000190542861698772	0.0196448428538177	0.576157344232823
6d17u7XqUdxS4.SHVk	JAML	junction adhesion molecule like	0.124001242408319	5.04921456537352	3.93755997162793	0.000192731054796541	0.0197397175070562	0.565685929605578
iF7lChFBpJNJC1u_3U	CECR5-AS1	CECR5 antisense RNA 1	0.135455050321939	4.5045452440075	3.9341523235053	0.000194978932096288	0.0197674873726424	0.555052725921557
WhTpus.PuSSNSISKSU	PPFIA1	PTPRF interacting protein alpha 1	-0.0526295631156751	7.78234788109046	-3.93330511605618	0.000195541691635851	0.0197674873726424	0.55240999136209
6suzRLLJdSv18KhBNc	TNFSF10	tumor necrosis factor superfamily member 10	-0.077171627572121	7.92534435701208	-3.92527435408757	0.000200954140495828	0.0201835745757358	0.527376806431203
660wCgAN292N0iQt2o	CCNL1	cyclin L1	-0.0942806042794267	6.11993018725012	-3.92296621831107	0.000202536151784344	0.0202120693011453	0.520187856634338
ridVPYpfRLtFRPRd.U	DUSP28	dual specificity phosphatase 28	0.0577190608559201	7.3985095543	3.91386679394175	0.000208890162803722	0.0206446602943538	0.491872319362997
xVS4peoX.wjZ7u3sBU	SPIB	Spi-B transcription factor	-0.0992779978191964	7.78738740068503	-3.91297490823867	0.000209523145330672	0.0206446602943538	0.489099159508329
HXhS1CUgB417FAn4u0	OIP5	Opa interacting protein 5	0.0684016038780104	7.5443599770506	3.89853739101617	0.000220029177960928	0.0215434858018599	0.444263190888922
NT6kf1TdQdoLCVCIEE	GPR183	G protein-coupled receptor 183	0.0684156054466921	9.19066860478503	3.8907460335699	0.000225906871360489	0.0219807385833755	0.420110085832754
QQEinmvQIVERkQhWuc	PTP4A3	protein tyrosine phosphatase type IVA, member 3	-0.0906453291735198	6.38930266665992	-3.88312964716065	0.000231797884599308	0.0224011575946067	0.396528690637406
o5RKSV6hMoJ6iQoCrc	RPL13A	ribosomal protein L13a	0.0485741297346285	12.4809360860053	3.88146414820818	0.000233105571064124	0.0224011575946067	0.391375941145362
6Vye6yguldItCiko4M	LOC154761	family with sequence similarity 115, member C pseudogene	0.0994086201782888	5.60361620212573	3.87562983840551	0.000237742447370491	0.0227065915378147	0.37333661908551
WIqErSEVKVFUiFdTgc	CLN3	CLN3, battenin	0.0835536990542435	5.4831171739034	3.8674604499353	0.000244383928364212	0.0231657677105689	0.348106103999412
KVKklX_6VKMNBHvd3s	RGS16	regulator of G-protein signaling 16	-0.125124779850549	7.09724090073821	-3.86561267537555	0.000245910580579119	0.0231657677105689	0.342404053290194
3gg5hlBNIk1wqBktIo	SMYD3	SET and MYND domain containing 3	-0.0654786501284862	7.84125401996179	-3.86200496101213	0.00024891769235148	0.0231657677105689	0.331275959998084
HuFNHoSf3dAH9fQZTo	FAM69A	family with sequence similarity 69 member A	-0.0609131778878232	7.96762202996269	-3.86153951688519	0.000249308206748073	0.0231657677105689	0.329840762868484
lkkLCXcnzL9NXFXTl4	SEL1L3	SEL1L family member 3	-0.0902121351080226	9.01740737496366	-3.85974548782293	0.000250818921467073	0.0231657677105689	0.32430989627837
cJAK6QVOikgIKGUl4U	ECHDC3	enoyl-CoA hydratase domain containing 3	0.0970400426274372	6.31567732815051	3.85773426749589	0.000252522954507077	0.0231657677105689	0.318111375897397
f3uDfp6h9d4uOXirSc	SUSD1	sushi domain containing 1	-0.0599225988158062	7.72187351582827	-3.85585219380401	0.000254127606683361	0.0231657677105689	0.31231273229062
BqKCCXjU0U3n4c7J_g	PRPS1	phosphoribosyl pyrophosphate synthetase 1	0.0618974699604631	8.96111882833602	3.85547028470767	0.000254454411517682	0.0231657677105689	0.311136294020226
ipJS5GhY.st50N3vkU	MANF	mesencephalic astrocyte derived neurotrophic factor	-0.0582144463373672	11.1551569929339	-3.85119107847596	0.000258143820120603	0.0233650173932415	0.297959609755291
QVKShI2qCq7sUpzj90	CARD11	caspase recruitment domain family member 11	-0.0665199876718414	9.1223842037666	-3.84597596361881	0.000262709433469876	0.0235673187691807	0.281913578173608
Wea2pon3v3VJQ07h0I	ST3GAL2	ST3 beta-galactoside alpha-2,3-sialyltransferase 2	-0.102733450351425	7.46304697397682	-3.8451873023793	0.000263406568977225	0.0235673187691807	0.279488200342969
xvrrv4q_nIDgJej.uU	GCA	grancalcin	0.0673724181378055	8.52791729623399	3.83988689727856	0.000268138018996558	0.0238535581699338	0.263196002801449
3V0_El0Xi0X1C_9Tqc	EIF6	eukaryotic translation initiation factor 6	0.0500913485380442	9.91358680173504	3.83133315071636	0.000275945652245275	0.0244086472395138	0.236933927388936
cXFu7uv_q.b_r_r34Y	TOX2	TOX high mobility group box family member 2	-0.0692804826016568	10.5077880549254	-3.82698906708403	0.000279993682588341	0.0246267889860751	0.22361081184774
3H5erRMnCgiuh_VJ.k	TAP2	transporter 2, ATP binding cassette subfamily B member	-0.0596819530987026	8.45682166867746	-3.82344546199826	0.000283337819812984	0.0247809167351041	0.212749863456905
05XeX4.r6D.5wPrDvk	FAM135A	family with sequence similarity 135 member A	-0.0807988936001893	5.75863013746	-3.81595349983321	0.0002905343444949	0.0252015564282617	0.189808564891282
Et61PE22bedK3o4wRk	TMEM147	transmembrane protein 147	-0.0627879684861694	9.02340586504383	-3.81368091220331	0.000292751667968361	0.0252015564282617	0.182855308022395
cU6IqFSTKAlEx0l6Oo	SOCS3	suppressor of cytokine signaling 3	-0.104886641513144	4.97551612822067	-3.81342363441166	0.000293003707188808	0.0252015564282617	0.182068302351693
Qmd6QFgCjh6GtXzpZM	IL4I1	interleukin 4 induced 1	-0.0927661218081222	8.45009209598227	-3.8106717780015	0.000295712550123278	0.0252947965951604	0.173652573689557
TpU8h7_SpNHn1V4RdE	GINS3	GINS complex subunit 3	0.0698346879056217	7.79781943278485	3.80107430919548	0.00030534872937482	0.0259763334366514	0.144332037430498
oJfvfK.oEt63Xu.Tv0	NUP62CL	nucleoporin 62 C-terminal like	0.094847939116202	5.46060766374418	3.79862517130533	0.000307855431144238	0.0260472464785516	0.136857444616438
lmWL3jqIrEr6vd5cU8	MYPOP	Myb related transcription factor, partner of profilin	-0.058696951306583	8.4138270080491	-3.79228224850498	0.000314439253297405	0.0264604880828865	0.117513680455244
NB16f3mIZOUCOFZ64Y	GNG8	G protein subunit gamma 8	-0.111299150743804	5.33379343703814	-3.78949760780617	0.00031737198988146	0.0264828257791662	0.109028033066934
3s53P14OjugOAnJkXk	TBC1D9	TBC1 domain family member 9	-0.0919165734040389	5.77770562771535	-3.78880365230791	0.000318106912943478	0.0264828257791662	0.106913963527273
HueHpxsvakDXUAqAqI	MCL1	BCL2 family apoptosis regulator	-0.0724923947884838	8.96217066712067	-3.78593353775212	0.000321163782211948	0.0265094152027089	0.0981730780734731
f17ZSAo.TURJCjUXe8	STAMBP	STAM binding protein	0.0498941050982851	8.26641433259794	3.78061184168256	0.000326906220289166	0.0265094152027089	0.0819772304924102
HpT_uQ.IC76XV9ZyUQ	BRMS1L	breast cancer metastasis-suppressor 1-like	0.0670905859027552	6.907779561168	3.78047735122235	0.000327052607747774	0.0265094152027089	0.0815681175215772
fh61eV018l6l9VIrPA	EDC3	enhancer of mRNA decapping 3	0.062786615943008	6.1978798080366	3.77940983963464	0.000328216775879365	0.0265094152027089	0.0783211357134377
NZ6BfqQoIO4kIsiIuU	RSAD2	radical S-adenosyl methionine domain containing 2	-0.103687523800071	5.80047314853433	-3.77930790228459	0.000328328149977277	0.0265094152027089	0.0780111103109373
fTneb76.RSfeV0TkSo	SLC20A1	solute carrier family 20 member 1	-0.0762296037108908	8.95080252550621	-3.7790197373514	0.00032864318692978	0.0265094152027089	0.0771347340238897
HVRNhyS8dP591c7VeE	MSL3	male-specific lethal 3 homolog (Drosophila)	0.0662106512751434	7.97088081919541	3.7771271733937	0.000330719428509819	0.0265393817682519	0.0713800798604529
Niq0l_574oB.U6goUY	SCIMP	SLP adaptor and CSK interacting membrane protein	-0.0774967849919928	8.94277675830844	-3.77545280816706	0.000332566742125236	0.0265507643149009	0.0662904456583027
9SSCdJIx6EFTVfLIpE	FAM212B	family with sequence similarity 212 member B	0.0866051418414819	6.1518345977357	3.75486183548904	0.000356106306865749	0.0282850152310509	0.00381860525261146
Wd5mI1lvNILUeB589s	HIST1H3A	histone cluster 1 H3 family member a	0.111959127109289	4.76907750246416	3.75313879529887	0.000358146665792474	0.0283026766145037	-0.00139896447707777
H5KWLx3fVAo7kHpWig	CENPA	centromere protein A	0.0749328237688005	6.62427139669074	3.7504660015159	0.000361333797989393	0.0284103260964589	-0.00948942502680694
rwEDr_69En9NQn64w0	TMED7	transmembrane p24 trafficking protein 7	-0.0634245671239085	8.30769315790187	-3.74709790931894	0.000365388615778005	0.0285280990607977	-0.0196792008727389
QK7hd1.l5MXQpSqDOU	NLN	neurolysin	0.0818016071761997	5.32991914989779	3.7453450001504	0.000367516085571242	0.0285280990607977	-0.0249800722361044
xWRvd5Vv35VLuv5Pt0	STMN1	stathmin 1	0.0618212668897621	8.90942829629126	3.74467765708417	0.000368329130987946	0.0285280990607977	-0.0269977220586295
uqeFdeSfoX_H3hXdNc	HCST	hematopoietic cell signal transducer	-0.0532935327002987	10.5060554075539	-3.73905925089134	0.000375242650257312	0.0289196909861675	-0.0439751768711325
ft2.uZursn_5Nd1S6I	USP5	ubiquitin specific peptidase 5	0.0500244915569256	8.93609511762913	3.73521269832311	0.000380047146594391	0.0291456846215836	-0.0555889493512662
rXu0hfe_1zgLVACWpI	TBCE	tubulin folding cofactor E	0.0449643631333379	8.88598655813662	3.73131746799834	0.000384972260006047	0.0293786673714418	-0.0673417525402114
6l9Xbj0RR7VP6LxMfo	RNLS	renalase, FAD dependent amine oxidase	0.0744257430896868	5.64712670214045	3.72318236095081	0.000395455470067832	0.0300314671122732	-0.0918614206953032
6XE1SJMwIB0Ul6Bl7U	LRRC8C	leucine rich repeat containing 8 family member C	0.0942024280138319	4.98546683898883	3.71501859094369	0.000406249170505488	0.0307013936234439	-0.116432303546768
05VLSnQle6_ygwJe40	ACSS2	acyl-CoA synthetase short-chain family member 2	-0.0702816002694782	7.84677858751926	-3.70065702538902	0.000425922842528348	0.0318624634108219	-0.159571169529968
ue59Hq.dBbp.0WSft4	ILF3	interleukin enhancer binding factor 3	0.0702889623227728	7.4727641957225	3.69948395138762	0.000427569349637397	0.0318624634108219	-0.163089969460748
HonqnQVHv.Cj_Z8fuk	BCAT1	branched chain amino acid transaminase 1	0.0959114422299463	9.32986769786253	3.69935355048133	0.000427752752624729	0.0318624634108219	-0.163481079976426
N_flnpOXig7P6f48RE	NFKBIZ	NFKB inhibitor zeta	-0.0779480626164876	8.81213203133093	-3.68555394776256	0.000447591107977312	0.0331361220245671	-0.204818831877069
lj0koY4jWfAj7qhW7o	POLR2G	RNA polymerase II subunit G	0.038609106047445	10.7960085538699	3.68355188731757	0.00045054113447941	0.0331361220245671	-0.210807697843809
Z.1lZlUpX5I2I.m1yI	RPL39L	ribosomal protein L39 like	0.0763653752571382	7.42912524549575	3.68269006147751	0.000451816729170502	0.0331361220245671	-0.213385060601326
cUSJ2.kBKqPAk0eZPY	DBNDD1	dysbindin domain containing 1	-0.0892998889651606	9.56098887443189	-3.6816467876398	0.000453365492756474	0.0331361220245671	-0.216504526346242
xbk7e4nl.TRT.14sqc	COLQ	collagen like tail subunit of asymmetric acetylcholinesterase	-0.120783038283814	4.4124414665293	-3.67799973997522	0.000458819479166563	0.0333780451012386	-0.227404881903567
cuEipAhpTKud4v_o60	GDF11	growth differentiation factor 11	-0.0747866183545884	6.95981611511406	-3.67501403627086	0.000463330953919408	0.0335302922240884	-0.236323288133044
EwZeQYTqwjnkPbnlbo	C12orf57	chromosome 12 open reading frame 57	0.0494963831978699	10.7867445625389	3.67377216081686	0.000465219881834731	0.0335302922240884	-0.240031405620438
6h7gFtL2gp68gTuokE	IL18R1	interleukin 18 receptor 1	0.0844357343965332	8.20854939501997	3.67154325065079	0.000468628538028588	0.0336203183411477	-0.246684632285943
NUU4V31054Hk9fVQ0U	HLA-G	major histocompatibility complex, class I, G	-0.0703224265717525	8.13229036873233	-3.66592372190809	0.000477328399765608	0.0340873785667476	-0.263446884088488
HRSSf1Sfd7irR55UeQ	GAMT	guanidinoacetate N-methyltransferase	-0.0664474808026553	7.70778579004759	-3.66136039848673	0.000484506097925556	0.0343896602726585	-0.277046109053691
cSVXknCD7Ph7XRJp.0	TDP1	tyrosyl-DNA phosphodiesterase 1	0.0792756383499582	5.25102758893459	3.66022304767097	0.000486310990652635	0.0343896602726585	-0.280433795693229
xkSEcSFEk9JVTov67k	TNFRSF13C	TNF receptor superfamily member 13C	-0.0758312451033262	7.57987404202576	-3.65855543936024	0.000488968947492146	0.0343896602726585	-0.285399632369179
xle716JP74WUHhBOco	TGM2	transglutaminase 2	-0.100114978798133	5.58321596453724	-3.65672623976994	0.000491900373038812	0.0343896602726585	-0.290844931328413
QElrAaDRs69.e6t7pE	DEF8	differentially expressed in FDCP 8 homolog	-0.0745956934749071	7.57812302269825	-3.65628732064634	0.000492606259044376	0.0343896602726585	-0.292151269833352
0oPYIX6crrifoInqf4	TSR2	TSR2, ribosome maturation factor	0.0464627755681303	9.50996828234322	3.65474307595027	0.000495097447165582	0.034409272578008	-0.296746519582837
BriVFLijx47oS_Oq.s	SELENOS	selenoprotein S	-0.051178379319013	10.610515094918	-3.64474071920264	0.000511526240213643	0.0353930689228711	-0.326479540012676
lBk1SUuU7XeSui8elw	RALY	RALY heterogeneous nuclear ribonucleoprotein	0.0496827346057063	9.42457184377662	3.64202933754623	0.000516068312377478	0.0355493428632415	-0.334530053314879
uuJ4hIwiDF_t0XNeV0	CASP7	caspase 7	-0.101735447329872	7.15193517858338	-3.64027435675918	0.000519028676607876	0.0355957640415481	-0.339738735900537
Qun3e4Pl7BEy6fdZX4	LEF1	lymphoid enhancer binding factor 1	0.0757832041653502	6.42623227463194	3.63833479532327	0.00052231920333023	0.0355992436040322	-0.345493296564944
lfg7eLirXnyd.pe4jk	PQLC1	PQ loop repeat containing 1	-0.0392787458996038	10.1767427789325	-3.63755203362125	0.000523652799673906	0.0355992436040322	-0.347815123676599
rItcu7lcV6dKfep3iA	CAMP	cathelicidin antimicrobial peptide	-0.15097731503717	5.98489088616819	-3.63317632427965	0.000531167630796242	0.0359531203314604	-0.360788209304015
0qVS76JdKCBSQCEtQY	RBM6	RNA binding motif protein 6	-0.0655535693038134	8.42694106741825	-3.62927974583045	0.000537945907414719	0.0362134259121536	-0.372331993140264
9Irgos9On3Z796jnhE	TCTEX1D2	Tctex1 domain containing 2	0.0475029099282101	9.31689738615045	3.62792996038212	0.000540313058859691	0.0362134259121536	-0.376328861369569
iSOjrDrldS6e4hdPmQ	IGSF3	immunoglobulin superfamily member 3	-0.105650441019448	5.78099610296113	-3.62626166586718	0.00054325248618888	0.0362134259121536	-0.381267497803941
reEHuCUV6nEgFEt9Uk	ST3GAL5	ST3 beta-galactoside alpha-2,3-sialyltransferase 5	-0.0657681753817633	6.20853383393657	-3.62565908079103	0.000544317938299328	0.0362134259121536	-0.383050951299527
rR6c7nUS.S1StMd1BI	SLC35F2	solute carrier family 35 member F2	0.052990484012472	7.94188827763525	3.61854507281187	0.000557047718704814	0.0369026335523257	-0.404091079009434
ulC0Eu3eq6TX_R4D8Q	TMEM170A	transmembrane protein 170A	-0.0544106178603527	7.24387582641219	-3.61612816607306	0.000561436615865851	0.037020725894224	-0.411232934458561
Wnpz0q0VJLXUkKyARQ	GCSAM	germinal center associated signaling and motility	0.0736702773443631	7.76058948444186	3.61495089621718	0.000563586333307496	0.037020725894224	-0.414710557894016
osGi.IlKnjn_u6Ukd4	TAP1	transporter 1, ATP binding cassette subfamily B member	-0.0408563659533116	11.9275511979121	-3.59795119838664	0.000595514314255876	0.0389536422030903	-0.464842428833822
ES97kTH.Qx1WGgiQq4	CENPU	centromere protein U	0.0736945200292885	7.00557460884138	3.59454752032466	0.000602110290627427	0.0392203054581079	-0.47486073030721
0Ru4E3t_tEiernlrRc	CLPTM1L	CLPTM1 like	0.0604246615379897	8.53568695510641	3.59238217037393	0.000606342599746938	0.0393314233035847	-0.481230843429933
363QqASg7R.hXt_gbY	SPCS3	signal peptidase complex subunit 3	-0.0515074306663301	8.86742842737205	-3.59078917505935	0.000609474245793942	0.0393705189150211	-0.485915529144941
T5S6OUihSnDh_7ueO4	SLC25A12	solute carrier family 25 member 12	0.0605777693974477	7.50334598966562	3.58782868651265	0.000615335107109305	0.0395848634193291	-0.494618021796184
opRpn6DXr756Od.5jw	RARRES3	retinoic acid receptor responder 3	-0.115684890822741	8.12795282545462	-3.58163447352294	0.000627771503308137	0.0402187109609098	-0.512810523987418
BLXpdZI59P_Ffp5LoI	WARS	tryptophanyl-tRNA synthetase	-0.0709858436230893	10.3256236629305	-3.570996809166	0.000649688367274812	0.0413171039355044	-0.544003922462093
uFCNkUeT1JcJDImIdU	SMIM14	small integral membrane protein 14	-0.0781534512105559	9.15110105912154	-3.57052429977593	0.000650678549621442	0.0413171039355044	-0.545388030654268
95NSiOe71W45J6BUJ4	ALDH18A1	aldehyde dehydrogenase 18 family member A1	0.0543165439881658	8.68188968890275	3.56947708610909	0.000652878183975725	0.0413171039355044	-0.54845516142436
ud1ShU0Ze5LpVRICHg	ITGAL	integrin subunit alpha L	0.0791629036460728	7.47065806280054	3.56400601116032	0.000664485294791461	0.0418814051389209	-0.564469198796617
ufoTZ9l1LF7ujXaYb8	NAPSB	napsin B aspartic peptidase, pseudogene	-0.099229377519061	9.45281904564477	-3.56238513157737	0.000667961518408245	0.0419307456394337	-0.569210374035296
upe1S87l9XQlAlglX8	ACADVL	acyl-CoA dehydrogenase, very long chain	-0.0567285967485881	10.6912822431878	-3.56087023426331	0.00067122605511541	0.041966454723039	-0.573640221314857
9uz4k3sO5ST7lSnKqc	TNFSF9	tumor necrosis factor superfamily member 9	-0.0698377211616591	8.68536223637165	-3.55832248442845	0.000676750537065992	0.0419976816047586	-0.581087440719021
TgQIj4ppGCkvUt0np4	ODF2	outer dense fiber of sperm tails 2	0.0737661169924535	6.0853964689419	3.55815239227346	0.000677120894321327	0.0419976816047586	-0.581584500983067
0tXC5Sd1XAL1J03Zek	FBXO16	F-box protein 16	-0.0926793135826191	5.08528029611119	-3.55486266513126	0.000684321888481881	0.0422758855551029	-0.591194894306215
oRR0i4XtXu4qfSYpXg	CHCHD10	coiled-coil-helix-coiled-coil-helix domain containing 10	-0.0607721851331076	9.78768193148358	-3.55319182504022	0.000688007031447394	0.0422947332692739	-0.596073663392999
rioPFQfpTMIiiUXkuU	GLIPR1	GLI pathogenesis related 1	0.0584477251127579	7.48939913014754	3.55226445608606	0.00069006052481986	0.0422947332692739	-0.598780861100686
xQox.DNS5a9IdFzukU	ATP7A	ATPase copper transporting alpha	-0.066700875816234	6.19714595296837	-3.55095167851778	0.000692977387830852	0.0423069489166694	-0.602612331110103
EujpL.ey.6oe6yd_j4	SMIM14	small integral membrane protein 14	-0.0738165488924796	11.3503275632399	-3.54350483957784	0.000709746305691114	0.0431614472148408	-0.624328413763603
iVdQ6eujigrA7edwgk	SELENOK	selenoprotein K	-0.0534087538595974	8.88179122121058	-3.54179686051941	0.000713646295256985	0.0431697818892811	-0.629304754432702
6KSl0.TRkk7kpegiQI	WARS	tryptophanyl-tRNA synthetase	-0.070038559782564	11.2812427098881	-3.54101894139342	0.000715429324732433	0.0431697818892811	-0.631570745151705
cm2tusjKa05MYP9J34	USMG5	up-regulated during skeletal muscle growth 5 homolog (mouse)	-0.0588715290156927	7.14423576289225	-3.53632549537999	0.000726276963054237	0.0434571545364006	-0.645235020299594
rkHTgfpT3_rOoT13jU	MMP7	matrix metallopeptidase 7	-0.232640927204805	7.81293353604533	-3.5357678629958	0.000727576104631014	0.0434571545364006	-0.64685766268775
WQ.ew7Vff3Kd757uDU	TMX1	thioredoxin related transmembrane protein 1	-0.038031970049733	10.814849843951	-3.53433818621853	0.000730916969050711	0.0434571545364006	-0.65101705003456
0nF7rjdku6ojstSECE	PPIH	peptidylprolyl isomerase H	0.0555863125587852	8.98544709748753	3.5319766910102	0.000736467202019425	0.0434571545364006	-0.657884879376446
6NSmokgnAlAlQiLpLk	MAGED2	MAGE family member D2	0.0794728410759954	5.59376070784284	3.53129814959807	0.000738069361694017	0.0434571545364006	-0.659857670580505
6xrPnqisFuHHnRAbZA	CABYR	calcium binding tyrosine phosphorylation regulated	0.080087259292957	5.52305150568063	3.53125878815493	0.000738162402621221	0.0434571545364006	-0.659972102086907
EgvWrnfZQXpJ3ves5c	PXMP2	peroxisomal membrane protein 2	0.0725702735332866	8.57829871932893	3.53059551988476	0.000739731882845977	0.0434571545364006	-0.661900223141211
uqc7KSvDXUfdO6_BS4	TERF2	telomeric repeat binding factor 2	0.062919534766724	7.52398060202538	3.52419529092547	0.000755040170761489	0.0441359402698296	-0.680492964167664
KTd53R6oV11X1Red0w	TPRA1	transmembrane protein adipocyte associated 1	0.0718310430654773	6.3152380879235	3.5222943122794	0.000759644567850355	0.0441359402698296	-0.686010883198313
Kjht2j5V2t.ejh3nhI	NUP85	nucleoporin 85	0.0470578511670909	8.81146163375814	3.52189178461405	0.000760622948544576	0.0441359402698296	-0.687179027804711
iukKCAu9Yk2uncGUEk	SSFA2	sperm specific antigen 2	0.0880662040966194	5.36456325286268	3.52106904640347	0.000762626408824779	0.0441359402698296	-0.689566348746737
9r9fSEj1KY7kLs5G7k	ITGAM	integrin subunit alpha M	-0.10210385607447	5.28926076758239	-3.51411710056106	0.000779756128824296	0.0447561678423814	-0.709723392104121
f0gM68T6BE4sV0.d0w	OAS1	2'-5'-oligoadenylate synthetase 1	-0.127474178542807	5.0875133129044	-3.51181454995566	0.000785509636425989	0.0447561678423814	-0.716393573509916
fSl_fvXk8qgL6oTnnE	RAD51C	RAD51 paralog C	0.0500605929826534	8.79574590808596	3.51028939212053	0.000789342766234532	0.0447561678423814	-0.720810099979042
3nR9jijgZ6GjrJLcqM	MMP7	matrix metallopeptidase 7	-0.225040851335381	7.65296026644225	-3.51022589519423	0.000789502734896599	0.0447561678423814	-0.720993944756267
TnHkoUgkQLmv1Ql.tQ	SLC45A3	solute carrier family 45 member 3	-0.116308738119867	5.71319576712536	-3.51001007309681	0.000790046688221604	0.0447561678423814	-0.72161880463417
QNB1VClYiueTFGxSJQ	NARF	nuclear prelamin A recognition factor	0.0698884354003929	8.72780221874845	3.50979360129018	0.000790592635961901	0.0447561678423814	-0.722245519087792
rl9r7CyUjV3UuE_gTk	ATP2A2	ATPase sarcoplasmic/endoplasmic reticulum Ca2+ transporting 2	-0.0756305867282833	8.14857274132622	-3.50829196001235	0.000794389673564656	0.0448081827465745	-0.726592238109043
rvtkCqMN6gIRQNOp0c	DUSP6	dual specificity phosphatase 6	-0.087867525326213	4.97648687859982	-3.50316861428071	0.000807475049651129	0.0452793566448383	-0.741412887565468
HpSYoruoTDJeLn6vFM	ARHGAP19	Rho GTPase activating protein 19	0.0530068665526605	8.29013464048579	3.50274738470309	0.000808559940086399	0.0452793566448383	-0.742630744503355
KiQUC6h97dVnM9U_d4	RAB27A	RAB27A, member RAS oncogene family	0.0845453670884235	6.74819879214765	3.49790402588147	0.000821133844491024	0.0458186798961873	-0.756626600644635
Kbi2l5Tv1O5T98Vfso	LOC81691	exonuclease NEF-sp	0.0656141908743634	6.61767139462504	3.4926837330039	0.000834893715576517	0.0464083183673717	-0.771696750832806
lqeoAM9DB7CVX.o5QE	PIK3AP1	phosphoinositide-3-kinase adaptor protein 1	-0.075168464607996	8.34858344520967	-3.49164297224855	0.000837662992114044	0.0464083183673717	-0.774699406297755
HuTfddOp686_i_eoe0	C3orf38	chromosome 3 open reading frame 38	-0.0601102428552931	8.11030121758169	-3.48912177472693	0.000844407564742926	0.0466160885387159	-0.78197065033456
rvSXzV_kbASHHIfPso	IMPA1	inositol monophosphatase 1	-0.0652552209227917	8.37229556414926	-3.48606590032382	0.000852651452901316	0.0469048686175537	-0.790779068401663
oelKRQk7u5H7F66.d4	SLBP	stem-loop binding protein	0.0523394197287974	8.90413812490888	3.48440602162339	0.000857161233593851	0.0469869228330601	-0.795561360100735
rrp5mKhYsciefk5vHA	NACC2	NACC family member 2	-0.0966105039543754	5.28279344331744	-3.47714721016677	0.000877149717933174	0.0477601285779479	-0.816456299759797
QnglKoVFBKFChYhEhM	WDR83	WD repeat domain 83	0.0571614269149752	6.92453746851815	3.47705654276931	0.000877402156557882	0.0477601285779479	-0.816717101017812
lXXuxKgiKrE.V7nhoI	SREBF1	sterol regulatory element binding transcription factor 1	-0.0661844470065435	6.56736394613618	-3.47357998022327	0.000887133756352168	0.047967833845222	-0.826713749605523
ZunCJUCClCvmCVCAnk	HIST1H1C	histone cluster 1 H1 family member c	0.0653824412994072	11.2440317880031	3.47349238195192	0.000887380276684477	0.047967833845222	-0.826965543839637
WXSeYr_hfin6OKg.9U	RBM43	RNA binding motif protein 43	0.0743997129660021	5.43343661959952	3.46972776191213	0.000898036230218921	0.0483758755434193	-0.837782488721845
ijfUpc6MjSik0eKUok	IFITM3	interferon induced transmembrane protein 3	-0.0804563843384253	6.02213669696674	-3.46844425803921	0.000901696866210982	0.0484055752178364	-0.841468544345882
ulIdet.UvyAKd7lCio	SYVN1	synoviolin 1	-0.0604858442698653	9.61857780086259	-3.46676845940096	0.000906497618550461	0.0484440526358357	-0.846279796847048
cmkkomFB42RE5.v6M4	HNRNPAB	heterogeneous nuclear ribonucleoprotein A/B	0.0527632081231379	10.1268822878801	3.46547079351214	0.000910231725560652	0.0484440526358357	-0.850004315142209
Tbs1URA5CdFCtV3S1U	MYL9	myosin light chain 9	0.12133048453992	4.44877093119484	3.46494497653703	0.000911748935142591	0.0484440526358357	-0.851513222622246
Qr_XT3UIlEHQnge4C4	FBXW7	F-box and WD repeat domain containing 7	-0.0631162302324521	9.26090249571388	-3.46373366528925	0.000915253206983795	0.0484648364840943	-0.854988650329327
6qXfVfFaV8j9OiSUfI	TYW1	tRNA-yW synthesizing protein 1 homolog	0.0655809124633887	6.50963523408108	3.45765957171802	0.000933018384499355	0.0491029433685871	-0.872403388482848
6SoQUUfcwWgfeUqFRo	TLR9	toll like receptor 9	-0.0817389863523061	6.05740698820663	-3.45745851228234	0.000933611975661727	0.0491029433685871	-0.872979473340046
irp0SIKOkjrklBDnhY	GINS2	GINS complex subunit 2	0.0664434562106663	9.63091307972491	3.45613739614737	0.000937521227364866	0.0491425268269907	-0.876764217985398
9UR9KET_8fbiQlaKdo	HAGH	hydroxyacylglutathione hydrolase	0.106194651522601	4.98814155360413	3.45489613377201	0.000941208297455544	0.0491702374992883	-0.880319281175821
B0lK3X1ev1LREiVJJ8	DBNDD1	dysbindin domain containing 1	-0.0842348131437068	6.17762758086855	-3.44970277338524	0.000956784077130903	0.0498167709457321	-0.895183803548163
ZsbVFe1UjVc9XUQwSA	SLC1A5	solute carrier family 1 member 5	0.0679586260004278	7.76443410551623	3.443168736109	0.000976727325543317	0.0505336892476493	-0.91386352485828
oNQKXoEQ6x0AEyeXao	PYGL	phosphorylase, glycogen, liver	-0.0761185920598404	5.95706469848301	-3.44306559925447	0.00097704525074142	0.0505336892476493	-0.914158178157101
EU1P0UVN1NSlmcix6E	ANXA6	annexin A6	0.0573612919972316	6.84861260108515	3.43805914349834	0.00099259616738456	0.0510669018924016	-0.92845380182753
QXe3Us0UQD731_i7fo	HMGN4	high mobility group nucleosomal binding domain 4	0.0422411777143906	10.1606722781188	3.43763792559	0.000993915164015782	0.0510669018924016	-0.929655901837209
0dW3111XpB542H_7d4	CBS	cystathionine-beta-synthase	-0.0830876137579286	6.50634237662571	-3.43599743872662	0.00099906798011323	0.0511627970868512	-0.934336654198098
NdfVN0.fHl8Z014rUU	SLC46A3	solute carrier family 46 member 3	0.0708837896929791	6.59814423792418	3.43275908468794	0.00100931398543746	0.0515180331976733	-0.943571975691039
Th97_OnxJBSx0EJJ4c	SNX14	sorting nexin 14	-0.0523594895377931	9.09176495014149	-3.4244440702632	0.00103607928246999	0.0527113799656627	-0.967257333137474
l11UXKUbuJ517d7fPk	TUBB3	tubulin beta 3 class III	-0.131445795658097	4.54570273432876	-3.41968651801505	0.00105169375200326	0.0533314929354617	-0.9807911689286
HaYzcA1psteKIEuVVM	MICA	MHC class I polypeptide-related sequence A	-0.0825970820092343	4.98830304141337	-3.41229241725489	0.00107640361593861	0.054407310041988	-1.00179904359019
W.QKefUblmuXJTuYog	RENBP	renin binding protein	-0.0724459660701615	5.80540078687792	-3.41075025496932	0.00108162594174279	0.0544943451813973	-1.00617656529536
Hepl7oM5SAMOl5OQro	DBR1	debranching RNA lariats 1	0.0780200876728855	6.1877409452693	3.40912111383039	0.00108716880625122	0.0545969160507064	-1.01079947354159
fdXvu97FLk4BV7RM1U	RPS23	ribosomal protein S23	0.0463508839037236	9.87886091584574	3.40713219798058	0.00109397212100195	0.0546081054448053	-1.01644118937226
oXgqduSGxKajfeguIM	LINC00623	long intergenic non-protein coding RNA 623	0.0566620260036355	7.62330996407768	3.40662446251475	0.00109571532142261	0.0546081054448053	-1.01788105044703
6dqTX1Sr6t8RAyCnfk	FCMR	Fc fragment of IgM receptor	-0.0622719982474433	10.4582552885054	-3.40598492753571	0.00109791476131963	0.0546081054448053	-1.019694460569
NGrUu7n6bv9KikiAp0	SNORA10	small nucleolar RNA, H/ACA box 10	0.0672923727182997	6.5310036008404	3.40357492092357	0.00110624059885406	0.0548469861240763	-1.02652591811354
0eucdTkqtLkkihLeiA	HBEGF	heparin binding EGF like growth factor	-0.0875437180033507	5.21723950289028	-3.40123810099531	0.00111437051834578	0.0550746673955781	-1.03314667391375
xYf1Y2UpKL93a4cc2c	HIST2H2AA3	histone cluster 2 H2A family member a3	0.0684579067933053	10.1047836938893	3.39760461395994	0.00112712378431392	0.055528680614554	-1.0434348382398
WAfno9OSUn_SvNIjQI	PTPN12	protein tyrosine phosphatase, non-receptor type 12	-0.0607211177689139	8.19496451581811	-3.39578845714062	0.00113354990313471	0.0555731832231693	-1.04857435892289
oH9WXQ1wCTtBDUTSOU	TSC1	tuberous sclerosis 1	-0.0560429384682999	8.01205349267754	-3.39508121780205	0.00113606167923829	0.0555731832231693	-1.05057524387407
clSSktCIEkTy9SCAjo	RPN2	ribophorin II	-0.0564043450357798	8.45219839585277	-3.39432977064232	0.00113873621840898	0.0555731832231693	-1.0527008778023
xIKKv3p7r3A6JVKCeU	NCOA5	nuclear receptor coactivator 5	0.0759642604897571	7.17188515669949	3.39179954030878	0.00114778555302008	0.0557387443304555	-1.05985575558598
cEwdDJaCV8VQAk.mio	MIR129-2	microRNA 129-2	0.0990651392069055	5.04894511721826	3.39138089277469	0.00114928937115084	0.0557387443304555	-1.06103922690584
9ixKLei1vgqwKXVkJ4	PRELID3A	PRELI domain containing 3A	0.0646795833756971	6.5474591897921	3.38676491004559	0.00116599417465472	0.0562950048801718	-1.07408128418739
xVkl.VQiRUESQgJUeA	ALG3	ALG3, alpha-1,3- mannosyltransferase	0.0496300069782407	8.60840193581921	3.38598324328634	0.00116884554699873	0.0562950048801718	-1.07628857541907
HXyt34Sg3ldISUofq0	SRGN	serglycin	-0.0698850031226799	12.8263543920831	-3.38522787379956	0.0011716072444229	0.0562950048801718	-1.07842126624734
BuPuFBPSlG4ke3zRNk	AP1S2	adaptor related protein complex 1 sigma 2 subunit	-0.04204596753993	10.6430372747009	-3.3834180217688	0.00117824930184863	0.0564337198732665	-1.08352979011971
NXnC1nXnUACp1ACmuE	HIST1H2BF	histone cluster 1 H2B family member f	0.093788384809824	5.47724234755843	3.38246960002897	0.0011817441340368	0.0564337198732665	-1.08620605401843
N6F6tMp4F7zoVUD3iI	TRAPPC4	trafficking protein particle complex 4	0.0541921406759503	9.51853457099194	3.37996547142419	0.0011910186562446	0.0566549980088598	-1.0932696778866
6qt7iLE7PMxCRBKn5E	ACSL1	acyl-CoA synthetase long-chain family member 1	-0.0778940073197454	8.41147223064745	-3.37923501336901	0.00119373696296256	0.0566549980088598	-1.09532945148452
31KT7HCzqgUSIIT1dI	FAM35A	family with sequence similarity 35 member A	0.0686824021712999	7.29558160823986	3.37828117352427	0.00119729537159011	0.0566549980088598	-1.09801865213504
lKdX3iXdeeeF40Xen8	UCP2	uncoupling protein 2	-0.0692366372542051	8.97229929012185	-3.37663208750471	0.0012034710994896	0.0567746608389517	-1.10266672400029
0l7FZhwch.3577kC9I	NMT2	N-myristoyltransferase 2	0.0687531393867231	7.40931801951788	3.36486681401626	0.0012484113946264	0.0587168235394074	-1.13578142929474
uqS5KEE0nR6SgLX74o	GYPC	glycophorin C (Gerbich blood group)	-0.0538322929769149	9.63468641022216	-3.36282348292762	0.00125637595079775	0.0589134361506606	-1.14152427485767
rgOgStynV2v15FUC4k	GBGT1	globoside alpha-1,3-N-acetylgalactosaminyltransferase 1	-0.0787545498911349	6.42812326746607	-3.35847439342545	0.00127348778578131	0.0595365100571873	-1.15373929076035
QnXJTIn1.UgV9R5UO4	PIK3IP1	phosphoinositide-3-kinase interacting protein 1	0.0919810330976497	6.27983356112268	3.35587819499636	0.00128380724077713	0.0598392548635278	-1.16102572496445
EVUVWAO9DDtU7AF5xA	FAS	Fas cell surface death receptor	0.0589837202844765	6.89510403281837	3.35242857395059	0.00129764092909061	0.0603035044300973	-1.17070116670022
WCCZ5K_Xruh3t8ApdU	MSL3	male-specific lethal 3 homolog (Drosophila)	0.0813360453716974	8.14800748616264	3.34934608645236	0.00131012111824286	0.0603727198904265	-1.17934089675498
uk7WTU553pd3ioPr10	TTC39C	tetratricopeptide repeat domain 39C	0.0537383721368458	7.65219275226011	3.34907163280077	0.00131123777823172	0.0603727198904265	-1.18010987351323
KuXKK3qj139uutHBfE	FAM46C	family with sequence similarity 46 member C	-0.0951627394149948	8.2707832927497	-3.34853453406103	0.00131342564947113	0.0603727198904265	-1.18161461163614
xV6RCA9S07gkB5X_10	FNDC3B	fibronectin type III domain containing 3B	-0.0693594749465314	7.5874685695902	-3.34809857613685	0.00131520405336426	0.0603727198904265	-1.18283586705163
6bHjTiIenjHQL5Lx8k	PLA2G4A	phospholipase A2 group IVA	-0.0969606196952122	4.91654287047252	-3.34728710205211	0.00131852034704169	0.0603727198904265	-1.18510876035815
0SUKoATp33nUAB4qrU	NFATC1	nuclear factor of activated T-cells 1	-0.0753684004561109	6.52153618230631	-3.34497151074022	0.00132802698437317	0.0606296894214707	-1.19159244676942
opCY0JJhzkQYij.ink	POU5F1B	POU class 5 homeobox 1B	-0.0933057876895871	4.62367658481222	-3.34157137850948	0.00134210333430109	0.06102391962746	-1.20110707534885
ooYoxe3UjdLCsaLB7U	BRAF	B-Raf proto-oncogene, serine/threonine kinase	-0.0732456011672215	5.41457726341678	-3.3409953779461	0.00134450182632443	0.06102391962746	-1.20271822187905
rh7TsIrndekVIgCiTU	CTSS	cathepsin S	-0.0758885969492627	5.69821573058229	-3.33628166380047	0.00136428227822162	0.0617417049632388	-1.21589564188319
cIwRIqAqIlF6x_1FeU	ITM2C	integral membrane protein 2C	-0.0582557894940033	10.1365321904611	-3.33277837803222	0.00137916060528949	0.0622341226178166	-1.22568065805354
fpd5BREqM.ec5FJdHU	TNFSF4	tumor necrosis factor superfamily member 4	0.0741869100244802	6.18859842686276	3.3304964298187	0.00138893402487361	0.0624940025989373	-1.2320504159768
BHeh9JQSj14nguSOEM	HLA-DRB3	major histocompatibility complex, class II, DR beta 3	-0.06168577147402	10.1957756747671	-3.32882919678838	0.00139611586992637	0.062636114879002	-1.23670230880201
oTl3uX2dOe.fWHoOX0	PNKD	paroxysmal nonkinesigenic dyskinesia	-0.0670807156851763	6.4611962593869	-3.32496851446427	0.00141288081557764	0.0632061164853813	-1.24746795069054
c_VPae6MiCSgiR6H6I	YWHAB	tyrosine 3-monooxygenase/tryptophan 5-monooxygenase activation protein beta	0.0753555506071483	6.86223504911185	3.32315805879243	0.00142080782487352	0.0633786138041001	-1.25251339251635
WNQVcgWb6v7q7dudJQ	ABCG1	ATP binding cassette subfamily G member 1	-0.106189748227228	4.99374821158694	-3.32127744956548	0.00142908633537878	0.063557356360948	-1.25775226068369
WXVxXl7fe_Oefr_0qc	TMEM217	transmembrane protein 217	0.0970463840588257	5.10316903813228	3.32039648779313	0.00143297996420174	0.063557356360948	-1.26020565233028
3lfTfn5C7k69DV0TUo	PARM1	prostate androgen-regulated mucin-like protein 1	-0.0544706863878553	7.9106134538363	-3.31903729258345	0.00143900686424173	0.0636433490412363	-1.26398996375014
Qn9O1SB8l.F7gu8cSU	CYP1B1	cytochrome P450 family 1 subfamily B member 1	0.094007233385421	8.27723115135995	3.31738495953694	0.0014463657304836	0.0637875968616678	-1.26858894523129
ozVNBKk4q944dRNXS4	TRIM35	tripartite motif containing 35	0.0973184952919066	5.23075962573552	3.31644236640419	0.00145057953989255	0.0637927182967435	-1.27121175503584
uemnSNkU_XGAECV450	LGALS3BP	galectin 3 binding protein	-0.136877141224304	4.39851466196382	-3.31045580403598	0.00147761311571365	0.0647985379871269	-1.28785718588008
uChLq97tRf7n_YpYlQ	FAM13A	family with sequence similarity 13 member A	0.118546455456046	4.51938881409221	3.30718291932492	0.00149259230060496	0.0652715644264553	-1.2969482166425
TpXkSunv37e87SKBLU	STAT2	signal transducer and activator of transcription 2	-0.0455608336035989	10.8368131480283	-3.30471861564121	0.00150396499778533	0.0654624575669447	-1.3037890108008
0npZXr0z_L8PseFehU	CYTH3	cytohesin 3	0.0875568783935899	5.34077277747002	3.3044159485027	0.00150536740807851	0.0654624575669447	-1.30462894865245
cH7riqK03sh16F7.5c	ZNF69	zinc finger protein 69	-0.0704965704482108	5.9076817177229	-3.30238922252285	0.00151479001392033	0.0656232028007367	-1.31025193520817
iaGe9wAK3Xkje3qe44	SGK1	serum/glucocorticoid regulated kinase 1	-0.0881879524331783	6.95635586069162	-3.30180971931837	0.00151749441214448	0.0656232028007367	-1.31185926448449
rvRNLp.s5Aznu_hehk	NETO2	neuropilin and tolloid like 2	-0.0530508403879162	8.58088500443631	-3.29819519495757	0.00153446531027362	0.0661732851809965	-1.32188005642412
iCHxKXZxCBecKeXSF4	ICA1	islet cell autoantigen 1	0.0680431802736938	5.55833129042399	3.2952449278579	0.00154844957692801	0.0665918867779429	-1.33005343676745
BGm6KH.W4lIY56KKz0	ABCA7	ATP binding cassette subfamily A member 7	-0.0955372183345417	5.77559458698561	-3.29343762006085	0.00155707533949275	0.0667783715846366	-1.33505778056787
u_M5UdFdhg3lZ.qe64	UBE2G1	ubiquitin conjugating enzyme E2 G1	-0.0544922087550218	8.61692636081071	-3.28892830950315	0.00157879446485483	0.0674494304161843	-1.34753522102349
Zm6nY9dKlG8USF7_.c	SNRPB	small nuclear ribonucleoprotein polypeptides B and B1	0.0375876784320788	10.6551104589173	3.28782862710146	0.00158413413923075	0.0674494304161843	-1.35057621935799
6l.js.1XQjzQe7vYS4	CLIP1	CAP-Gly domain containing linker protein 1	-0.0529155308317345	8.3593998268729	-3.28750266347785	0.00158572016523147	0.0674494304161843	-1.35147747968597
EA4JWlRFYRSV559cHw	CKB	creatine kinase B	-0.104076671739165	5.69684599902879	-3.282916712484	0.00160819269500039	0.0682189206424142	-1.36415040125664
xe8O2RSAOSkdJCgqUU	E2F8	E2F transcription factor 8	0.0812952551318842	5.12643350404047	3.28104607539446	0.00161744507968378	0.0684249592405354	-1.36931610133081
0umgul1FX1e.sDPe6I	SIPA1	signal-induced proliferation-associated 1	-0.0561388050801336	9.4552413618434	-3.27864260397871	0.00162940639290282	0.0686366833842879	-1.37595008851066
9RrkTnpPQTugJ_3yKk	PRKCB	protein kinase C beta	-0.0710594158923161	9.73913075073444	-3.27672369111163	0.00163901585841209	0.0686366833842879	-1.38124409435753
i4S65HUyJ1CQeOpOFs	PPIC	peptidylprolyl isomerase C	-0.099884466144203	5.0557698890259	-3.27663659293064	0.00163945328703913	0.0686366833842879	-1.38148433270612
06TJxbi90koH1SY4w4	ALDH5A1	aldehyde dehydrogenase 5 family member A1	0.0616556995918441	7.21463596771665	3.27651081098529	0.0016400851887818	0.0686366833842879	-1.38183126232128
ivtSU0U01N1IL.U31Q	OGFOD1	2-oxoglutarate and iron dependent oxygenase domain containing 1	0.0597607083833342	7.7801709886584	3.27342770851542	0.00165564580755335	0.0689250066045692	-1.39033201679343
NchnpHOtOmiqGkueKY	MOB4	MOB family member 4, phocein	0.0764180637407934	6.41716636126853	3.27339149056075	0.00165582942382508	0.0689250066045692	-1.39043184288495
T4lJe91qXg7eq5_5f8	RPP25L	ribonuclease P/MRP subunit p25 like	0.054392930667378	7.67594524810594	3.27224926433203	0.00166163006409496	0.0689537593840545	-1.39357970578866
leeptpBBeeudtdxxC8	OPN3	opsin 3	0.0881428793073679	4.92890741766015	3.27151312403987	0.00166537856682968	0.0689537593840545	-1.39560801533966
Ti5euyS2aJTVpt55Tg	STARD7	StAR related lipid transfer domain containing 7	0.105987633131966	4.71705466455632	3.27062755906659	0.00166989848630578	0.0689575056626216	-1.39804760233197
iSUei8HBX1_ze31SiI	PTK2	protein tyrosine kinase 2	-0.0659407827780417	8.29454498277638	-3.26635411487783	0.00169187263401618	0.0696800877417033	-1.40981353297372
E3PniCQFleSTV0l7Fo	IGF2R	insulin like growth factor 2 receptor	-0.045120452397787	9.94435326610373	-3.26402159015524	0.00170398086188082	0.0697031822023677	-1.41623090154109
Nibjj6u9MZ_7iO5RX4	SNORD13	small nucleolar RNA, C/D box 13	0.115697102754186	10.2457784447878	3.26371340030417	0.00170558676323675	0.0697031822023677	-1.41707856211288
QZcruSjd.BLJCnje3o	SERPINB1	serpin family B member 1	-0.0875161121606747	7.96406291517746	-3.26365995622857	0.00170586539177172	0.0697031822023677	-1.41722555144258
WQ1fJHj48iK1VAgFHo	TPGS2	tubulin polyglutamylase complex subunit 2	0.052059419900363	7.81055620827692	3.25915851891463	0.00172948754562007	0.0704834086654796	-1.42959977617013
NpT7uXl8uHW6.7iiSI	SGSM2	small G protein signaling modulator 2	-0.0551798418583942	9.71027530903726	-3.2569324012748	0.0017412827519165	0.070778824756752	-1.43571469033171
3XvEjhMkXpxRJPuSKU	BRD8	bromodomain containing 8	0.0531912697554602	7.13292394948152	3.25507666892566	0.00175117315496752	0.0708846297475911	-1.44080988055213
Bx9Eg6K.SSUCVQuWSE	SH3KBP1	SH3 domain containing kinase binding protein 1	0.0805624824428315	5.25218518961357	3.25473643571537	0.00175299219249888	0.0708846297475911	-1.44174381329099
BslSRJ9.skdYOv6Fuk	CDC25C	cell division cycle 25C	0.0807863068146468	6.32907774653688	3.25301337869233	0.00176223170106539	0.0708982775013724	-1.44647248031036
9uVRJH_8xd5REfRkmY	URGCP	upregulator of cell proliferation	0.0507337695238769	6.82372517270558	3.25281649105045	0.00176329037370273	0.0708982775013724	-1.44701269279927
EZTtaWYK6QgglHgElQ	TMA7	translation machinery associated 7 homolog	0.0405053700998861	11.6621069964591	3.25133459281109	0.0017712777855555	0.0708982775013724	-1.45107790530776
xu.jfK3TjeLkxXdSgo	UPF3B	UPF3 regulator of nonsense transcripts homolog B (yeast)	0.0435987960702454	9.10216223556286	3.25046388327547	0.00177598673188467	0.0708982775013724	-1.45346584964069
NLnrgCsqeLjxfJRKuk	EDEM1	ER degradation enhancing alpha-mannosidase like protein 1	-0.0556637827431635	9.85201595853437	-3.25044292546935	0.00177610022003695	0.0708982775013724	-1.4535233212689
f0O9LnSs7LCx7LXuqk	KBTBD8	kelch repeat and BTB domain containing 8	-0.0611648081713497	7.90675887442192	-3.24849216457761	0.00178669360930783	0.0711387368534638	-1.45887162572416
idG61Svei9_169yedE	NUP133	nucleoporin 133	0.0496145137368835	8.44396148420397	3.24683761861644	0.00179572490397028	0.0713159319005341	-1.46340598568619
WTJl3eN9eTp0rj3oQo	LYPLAL1	lysophospholipase like 1	0.0500456548586536	8.48532284451788	3.24173775733876	0.0018238327524882	0.0721882467284366	-1.4773718347847
lRf7tfREkvxNS57xfQ	RNPC3	RNA binding region (RNP1, RRM) containing 3	0.0740521860078151	6.24403451246447	3.2411742749345	0.00182696359269039	0.0721882467284366	-1.47891393924247
3F3V.qj8O3rnll4v0I	DNAJB11	DnaJ heat shock protein family (Hsp40) member B11	-0.0479617676980719	10.9995440735142	-3.23821301053227	0.00184350015649662	0.0724349503481833	-1.48701494412508
r_Uq3ecX_3k1dX51ec	FAM188B	family with sequence similarity 188 member B	-0.105950051418973	4.78826343119794	-3.2376242739099	0.00184680453025845	0.0724349503481833	-1.48862488403749
rIBUJ112gWdFyJSFBs	MEN1	menin 1	-0.0746214898822528	5.61483861110979	-3.23598228684462	0.00185604982719103	0.0724349503481833	-1.49311388285386
3SO4Vx_KWX6f_rRXt0	CPNE5	copine 5	-0.101679711780579	4.81545594160304	-3.23550323946235	0.00185875530298902	0.0724349503481833	-1.49442322960551
uoh_KKn4r64ryubv14	ITGB2	integrin subunit beta 2	-0.0416672069603748	11.8264780610016	-3.23440438827395	0.00186497518001704	0.0724349503481833	-1.4974261098196
TCdddJ.ie6eUVOqd18	ATP5D	ATP synthase, H+ transporting, mitochondrial F1 complex, delta subunit	0.0744955757078896	6.80400010091657	3.23416247634924	0.00186634710568395	0.0724349503481833	-1.49808709372832
QkXgJ9dhN7wwJbKV_0	BIRC5	baculoviral IAP repeat containing 5	0.0701698002305943	8.73607208036039	3.23253584358794	0.00187559665215923	0.0724349503481833	-1.50253066117789
BiXUgqHpd5URfh9LP0	CDT1	chromatin licensing and DNA replication factor 1	0.0583464344300266	8.69022911201639	3.23243035099089	0.00187619799910487	0.0724349503481833	-1.50281878524301
cjif7cfQC.v58VfSXU	GJB2	gap junction protein beta 2	0.0844465088252309	5.45170721915349	3.23198183652538	0.00187875671820085	0.0724349503481833	-1.50404370291509
Elt5ZXKfXh1PL1hH7g	PACSIN1	protein kinase C and casein kinase substrate in neurons 1	-0.0918068617497987	4.59935031256578	-3.2318104448399	0.00187973535076221	0.0724349503481833	-1.50451175034385
oAseZhDNSpNFCWlNaY	HIST1H4K	histone cluster 1 H4 family member k	-0.0667385628251654	7.516502327756	-3.22829777196307	0.00189989808838407	0.0725810827613418	-1.51410039990611
cdVNUFIjp0faNir4cQ	MSI2	musashi RNA binding protein 2	-0.0665117233487438	6.98967883674348	-3.22824294276533	0.00190021441021799	0.0725810827613418	-1.51425000859926
Z1USglULSWVnEx0esA	SCIMP	SLP adaptor and CSK interacting membrane protein	-0.0577977749140187	8.30898823149334	-3.2279930603442	0.00190165666328096	0.0725810827613418	-1.51493182226896
EoKilM3EESXdpHnnXw	SUPT16H	SPT16 homolog, facilitates chromatin remodeling subunit	0.0491014276478438	10.1500130861595	3.22650477906114	0.00191026791102453	0.0725810827613418	-1.51899185727398
6It6wiv6oISlXqCSWk	SHF	Src homology 2 domain containing F	0.0972888176669579	4.70447051694428	3.22633814064691	0.00191123436064161	0.0725810827613418	-1.5194463623033
fRHj2H97qfIo4oIXHo	CTH	cystathionine gamma-lyase	-0.0844276115049662	7.66665938142113	-3.2262922199805	0.00191150076645363	0.0725810827613418	-1.51957160756957
3Aq_iknpEIp4peng8U	OAS1	2'-5'-oligoadenylate synthetase 1	-0.0856916956008555	9.14024449743213	-3.22492455645483	0.00191945116591118	0.0727056344304264	-1.52330121411796
BnUkX396HpvRdXnS58	ELF3	E74 like ETS transcription factor 3	-0.0911359634378057	5.09311438087196	-3.22224996199529	0.00193508863983301	0.0731200484100007	-1.53059147626941
rXqX_eExSVSHHwPSf8	TRAPPC2L	trafficking protein particle complex 2 like	0.0669017759943329	5.88179195767264	3.22064208968967	0.0019445467648752	0.0732429061267404	-1.53497200163854
TRPIdFYoP8ASXM5UqU	DEPDC1	DEP domain containing 1	0.0708810821977853	7.11280917290604	3.22009930152191	0.00194774943065715	0.0732429061267404	-1.53645042625915
E5w5yFLPwqcN0RdfJ4	LHFPL2	lipoma HMGIC fusion partner-like 2	-0.103929088211136	7.63228971361169	-3.21848910604369	0.00195727935218141	0.0734239155536391	-1.54083514164822
HNSh78ye_gocrfVyVU	BRCA1	BRCA1, DNA repair associated	0.061405736970373	7.04592983728103	3.21718716203729	0.00196501684431824	0.0735369765200635	-1.54437928791201
6VwfoP75Tl53ZVFIL4	RAN	RAN, member RAS oncogene family	0.0326571344923595	12.6907485238598	3.2163930210454	0.00196975052188748	0.0735373528171324	-1.5465405807172
0RfXre_jl8zbjeffro	OPN3	opsin 3	0.0659261815528299	6.89004318407647	3.21538246680919	0.0019757896464585	0.0735863474068564	-1.54929028888704
cp60Tegk_9JKPBeOlw	SP140	SP140 nuclear body protein	-0.0709804980987614	8.08663082903611	-3.21130963428316	0.00200030552758038	0.0743216144471871	-1.56036602380843
32XiiRKCAggmeSvl64	MSL3	male-specific lethal 3 homolog (Drosophila)	0.0872453466440469	8.17527954450797	3.20948178634151	0.00201140047895126	0.074341399794919	-1.56533336926268
lO0dd56nvT7T57vSoU	NCALD	neurocalcin delta	0.0441620474449731	9.47915431487421	3.20903355328601	0.0020141300268541	0.074341399794919	-1.56655116806513
N_qS0pP7N.rKkELAE4	C4orf32	chromosome 4 open reading frame 32	0.0665869222999922	6.7878405033912	3.20886393364021	0.00201516384336176	0.074341399794919	-1.56701197311027
oB6j6EsuuTetfll4iU	PARL	presenilin associated rhomboid like	0.0482640107814285	9.51094232246838	3.20709455296142	0.00202597775780952	0.0744062661227142	-1.57181778008339
clX.OKO4y_eQOKrxI4	SPRY2	sprouty RTK signaling antagonist 2	-0.071768993587347	7.068574668719	-3.206277253439	0.00203099118688437	0.0744062661227142	-1.5740369886168
B.lfp34R3AVehTeDok	CERS5	ceramide synthase 5	0.0618772614966908	6.89363157926	3.20623340678266	0.00203126047675704	0.0744062661227142	-1.57415603347963
0IiH14JJlUUJ0Il01k	OAS1	2'-5'-oligoadenylate synthetase 1	-0.0742729661138443	9.179963489778	-3.20401525321806	0.00204492730447333	0.0747310522911757	-1.58017682514134
ci1cCkknQo6R0jdTpU	IL23A	interleukin 23 subunit alpha	-0.104691375220097	5.19246929827068	-3.20186407124159	0.00205826377295856	0.0749943054189047	-1.58601291892748
TK6x0JTnl18TX.6BIk	DBNDD2	dysbindin domain containing 2	0.0862612795679961	7.83556836462292	3.20130143206673	0.00206176533397297	0.0749943054189047	-1.58753886876605
rjki1Tu13jcC_Tr63g	OIP5	Opa interacting protein 5	0.0438563278463321	9.69136362096986	3.19891083899829	0.00207670542776268	0.0753616552433785	-1.59402027305417
x6gOLnSojonyqK6ufU	PSMB9	proteasome subunit beta 9	-0.0827566742983364	6.90967754061967	-3.19502206274757	0.00210122537025701	0.0760741315445609	-1.60455598374616
WeyXq7G.R0L3XHih34	NCOA7	nuclear receptor coactivator 7	-0.0451168907262228	9.63481431405163	-3.18991863300918	0.00213381574132878	0.0766367287105097	-1.6183682369745
TR7dIiv9e52V793Sgk	CECR1	cat eye syndrome chromosome region, candidate 1	-0.0659315309284378	8.31881124073987	-3.1898437014284	0.00213429776055006	0.0766367287105097	-1.61857091589538
li8BCeepAuFNnSpptc	H2AFJ	H2A histone family member J	0.0511841717506318	9.5942426420054	3.18948427691575	0.00213661128163732	0.0766367287105097	-1.61954305779786
TtlEjsVHJUr57i0mgk	PRKAB1	protein kinase AMP-activated non-catalytic subunit beta 1	0.0468580926947926	7.25009533841222	3.18895120861987	0.00214004682760378	0.0766367287105097	-1.62098470897684
rsS50XA1N4cfvXuV34	DKC1	dyskerin pseudouridine synthase 1	0.0428014794266282	10.626159039028	3.18850012809008	0.00214295801539918	0.0766367287105097	-1.62220449089643
iKl6Ke4iOKThxwq.qs	OXTR	oxytocin receptor	0.0707422271538785	8.76167314652296	3.18798285171226	0.00214630098392743	0.0766367287105097	-1.62360311917768
lKR6E10bovRKdNLg94	ZWILCH	zwilch kinetochore protein	0.0547881443051014	9.17124368404585	3.18698864753482	0.00215273988204327	0.076690742525514	-1.62629081176657
l5x1qJROuJuhSpKCvs	ATG16L2	autophagy related 16 like 2	-0.0784490519859636	5.8989994052325	-3.185235494906	0.00216413815697141	0.0769207827117143	-1.63102871467398
rrSTqTOwDtf96_Xdzk	TMED7	transmembrane p24 trafficking protein 7	-0.0507402075298772	8.7735938489136	-3.17888083796981	0.00220592893759853	0.0780670808820717	-1.64818613212659
HqCKfuFLFDfi.f.e1E	GOLPH3	golgi phosphoprotein 3	-0.0511994939409265	9.23076129008347	-3.17880713955719	0.00220641801054159	0.0780670808820717	-1.64838496813228
WWeUBYAKQUIteUJUKQ	HIST1H1B	histone cluster 1 H1 family member b	0.112798059014363	5.60995365132353	3.17725464530935	0.00221674420139913	0.078254588950979	-1.65257276019486
u2vOOyqgCSSXYJdOUE	C1orf132	chromosome 1 open reading frame 132	-0.0904374075164244	5.41476754386935	-3.17542740797975	0.00222895576128278	0.0785076545059963	-1.6574997309681
ZSQknRcXogMWlQEink	PTP4A3	protein tyrosine phosphatase type IVA, member 3	-0.0761911781239785	5.9073736675632	-3.1733396551726	0.00224298543167057	0.078823469977985	-1.66312660120374
iCx9eaSOkSV9RaijSc	ERCC2	ERCC excision repair 2, TFIIH core complex helicase subunit	-0.0749445615987424	6.61741571620599	-3.171552342946	0.0022550617696396	0.0790693730399759	-1.66794156321326
Zbl1wp_LkrFbvXIkSg	HPS1	HPS1, biogenesis of lysosomal organelles complex 3 subunit 1	-0.0570133808561613	6.48714581561325	-3.17076086750848	0.00226042895093639	0.0790794559734329	-1.67007313395018
cNEhRi5f1aF6G_XUiQ	OAF	out at first homolog	-0.0864406998913203	5.5507481406738	-3.16969012312017	0.00226770894911742	0.0791562621521523	-1.67295619664866
r3ug_u1e8kOkiFJeiU	SAP18	Sin3A associated protein 18	0.0680233041670727	5.9851343748397	3.16803231662904	0.00227902368392456	0.0793191601206947	-1.67741855314755
TJc6LpWwNL4e7J35ek	NCALD	neurocalcin delta	0.0485801269890918	9.42763426000217	3.16728451621619	0.00228414478483926	0.0793191601206947	-1.67943086143315
Tu1eiS4qhFJABfSd0g	NCF4	neutrophil cytosolic factor 4	-0.0666134321478118	7.54060447037046	-3.16677200773954	0.00228766077172353	0.0793191601206947	-1.68080980382557
Ngb_Kn1MbKg3SSZYOI	LEO1	LEO1 homolog, Paf1/RNA polymerase II complex component	0.0650504886227665	8.49540306702812	3.16382315860899	0.00230798949795754	0.079846178898229	-1.68874070315356
0yeeXXDfXnLqFF9F6o	HAUS4	HAUS augmin like complex subunit 4	0.0551477424853524	8.2087706070489	3.16274085264159	0.00231549298795892	0.0799281481963294	-1.69165018555819
udc1Je_oOhUuMQF7Xo	DUSP11	dual specificity phosphatase 11	0.0555716817561129	9.10844090956603	3.1600033234114	0.00233457392095552	0.080408510622645	-1.69900599956662
xg3S30l5Hj_yXke3x4	AKTIP	AKT interacting protein	0.0482161924171138	8.01432937537913	3.15846346950204	0.0023453714383167	0.0806020806881112	-1.70314156001397
QWoV50Skp.11Be6Z5I	ACP5	acid phosphatase 5, tartrate resistant	-0.0683385985224069	6.62986627847342	-3.15758093717607	0.00235158082994443	0.0806374677545701	-1.70551109107855
fHOWSllcVF9KSXOoZI	ARF1	ADP ribosylation factor 1	0.0555869715345231	6.95682997841154	3.15646832465687	0.00235943095081281	0.0807288374555029	-1.70849767212685
l6lSv4qIK_SJH1Rd3g	FGR	FGR proto-oncogene, Src family tyrosine kinase	-0.0727388776427224	9.93359291584093	-3.15333678589551	0.00238165753016292	0.0813106237490708	-1.71689946988238
NldFKA4B76RfiH1SfU	TTC23	tetratricopeptide repeat domain 23	0.051286017115095	6.17684023055256	3.15087790805966	0.00239924686629146	0.0817318932481959	-1.72349222002732
QcTp5rXYs3hZYjXono	HIST2H2AA4	histone cluster 2 H2A family member a4	0.0650853544178123	9.89860883213501	3.15001912746205	0.0024054186345235	0.08176322555079	-1.72579388814876
ZVH5eo6VRHtHSe9.jQ	USP39	ubiquitin specific peptidase 39	0.0515976861633723	8.03783270594207	3.14919933656931	0.00241132404302264	0.0817853871498397	-1.72799062436683
0F1H193lU_XVAznOic	MTMR12	myotubularin related protein 12	0.0722647403721709	5.69430623501511	3.14541413405472	0.00243876716608477	0.082478699066392	-1.73812807474723
lSdFQN653UAlAUm3pM	TRIM69	tripartite motif containing 69	-0.0603888324752858	6.31970486424908	-3.14492135493288	0.00244236127117207	0.082478699066392	-1.7394471610351
KlLu_qzueR9UqIAXtI	RIC8A	RIC8 guanine nucleotide exchange factor A	0.0396962235558282	8.78166596868953	3.14244512280923	0.00246049684919996	0.0829112877669803	-1.74607329644847
TXXUrmCtSdLpELgJDg	UBD	ubiquitin D	-0.165061716642524	7.6246676886432	-3.13805456753191	0.00249296246960338	0.0836438262509911	-1.7578124428752
xD9_VrR6T1IISbloFo	RUFY1	RUN and FYVE domain containing 1	0.0775555599679876	5.63243131634496	3.13777388474245	0.00249505151188075	0.0836438262509911	-1.75856249795864
lnkpwSolYfSSXrtF3Q	REC8	REC8 meiotic recombination protein	-0.0723919444223588	6.96132725804542	-3.13733057599243	0.00249835426559037	0.0836438262509911	-1.75974702914321
3WLeo0ucAt9ioiPcVk	BRD8	bromodomain containing 8	0.0562169431822718	7.94430598235753	3.13535122685679	0.00251315078519224	0.0839586511241905	-1.76503438004907
oK5FsuX6l7u8Ced0Us	MTG1	mitochondrial ribosome associated GTPase 1	-0.0687166629676353	5.3466369347755	-3.13400676789074	0.00252324787368415	0.0841154665899677	-1.76862436310041
rrhKyeoXKc3xTgr7.k	TSC22D1	TSC22 domain family member 1	0.0808252416586137	5.5309163225269	3.13081565838866	0.00254736553661642	0.0847380057137701	-1.77714070570329
6hUhVEJToh0oVSCk6A	LILRB4	leukocyte immunoglobulin like receptor B4	-0.0980896990366745	5.15027011023141	-3.12905679952235	0.00256075047615222	0.0850016277457096	-1.78183194256402
o7h_frpdPU7uXuXqk4	CDCA8	cell division cycle associated 8	0.0618778989998199	8.18521442452648	3.12581511184138	0.00258559205113166	0.0854328708390013	-1.79047305264392
W0kIFFlSUiUK0SJG1s	AES	amino-terminal enhancer of split	0.112003551943406	4.38372959802808	3.12547058818681	0.00258824538270744	0.0854328708390013	-1.79139103048374
BJuaJN4L5Lfm7o65JQ	S1PR4	sphingosine-1-phosphate receptor 4	0.0738575683037177	6.92501654899708	3.12521632210081	0.00259020523098719	0.0854328708390013	-1.79206847018658
cdeeAghJHeAknoNlLg	C2orf76	chromosome 2 open reading frame 76	0.0501275375990878	7.27151681703901	3.12369251576833	0.00260197959609595	0.0856397850994116	-1.79612747965651
QYlur3niyuidPn91Cc	ITM2C	integral membrane protein 2C	-0.0570045859361327	9.8770098817046	-3.11739959192	0.00265113612139095	0.0870736015565703	-1.81287452319802
97UiqveVfuClT16R8g	PKNOX1	PBX/knotted 1 homeobox 1	0.0521799095470395	6.19349082818651	3.11518763946222	0.00266861954265815	0.08746330324232	-1.8187551062539
Bp_tySwRS7eoI5e_QI	C8orf33	chromosome 8 open reading frame 33	0.0649921171590454	6.71817905829525	3.11422186992652	0.00267628675807555	0.0875303198523532	-1.82132167583483
EooPipCRUoeOK3wQAU	RDH11	retinol dehydrogenase 11 (all-trans/9-cis/11-cis)	-0.0461894982310642	10.7557747828392	-3.11171183713421	0.00269631011876438	0.0878887819633474	-1.82798940924995
rV0XE9TLqVuqdeuTfA	TSPAN4	tetraspanin 4	-0.0565352946731631	6.86029491408754	-3.11143365160606	0.00269853788402364	0.0878887819633474	-1.82872814361239
KsXk0b6uv1PyFilr0g	HERPUD1	homocysteine inducible ER protein with ubiquitin like domain 1	-0.0615432649617144	10.2497253917991	-3.10907318986846	0.00271751018996638	0.0883219178233749	-1.8349944747369
06lKHneI.ioBOhX.pU	PLEKHH3	pleckstrin homology, MyTH4 and FERM domain containing H3	-0.0632790564469529	8.03163259027169	-3.10775389443275	0.00272816824198373	0.0884835899816724	-1.83849526982058
ulT0A438W6XlU5861U	DHRS9	dehydrogenase/reductase 9	-0.0931413323764116	6.73439294837782	-3.10466036789576	0.00275331275891441	0.089113457444448	-1.84669969726724
cSdGHlX0eTtVAdJOHU	CLIP3	CAP-Gly domain containing linker protein 3	-0.0674802726312975	5.84074567660791	-3.10143493261978	0.0027797596075052	0.089705327498483	-1.8552474645276
WnO4ouDi6X3jneHfd4	FNDC3B	fibronectin type III domain containing 3B	-0.0541826503571284	7.61619537495535	-3.10102667865549	0.00278312391969214	0.089705327498483	-1.85632891025388
6yEdVgt.72TrREeOfI	CD24	CD24 molecule	-0.0821169826188255	8.04096579656178	-3.1001516240951	0.00279034781294759	0.0897126638911079	-1.85864653055847
Tf6QkorhHI6e4O41nQ	NPC1	NPC intracellular cholesterol transporter 1	0.0550585168877884	7.90932642162041	3.09936412551529	0.00279686385116521	0.0897126638911079	-1.86073183702552
3nfp1fivecuu8ouvEE	SLC11A2	solute carrier family 11 member 2	-0.0574783197531574	6.27759988498687	-3.098476355516	0.00280422659056697	0.0897126638911079	-1.86308218858617
WunOQSd0XGYt8f4vLk	ITGB1	integrin subunit beta 1	-0.0383940269774261	9.72684689644213	-3.09821446181676	0.00280640206288345	0.0897126638911079	-1.86377545023415
cFcSl0vX5IriqyItJc	MGLL	monoglyceride lipase	-0.0582799918039973	6.90912130643417	-3.09609128801419	0.00282409683659794	0.0900179757436371	-1.86939410876575
WTz6_nlDhVM73uIMsk	CRYZ	crystallin zeta	0.0463445432961287	10.8741398546072	3.09538987481408	0.00282996532628948	0.0900179757436371	-1.87124965963435
BenUqXufgChIws_VIk	EPS15	epidermal growth factor receptor pathway substrate 15	-0.0483386228836906	7.79489899289935	-3.09499196059486	0.00283329959624757	0.0900179757436371	-1.87230218044947
Kn2jl9iLrmGX37jnd4	BANF1	barrier to autointegration factor 1	0.0478088989506695	9.78244561573567	3.09200105600349	0.00285847901182328	0.0906329964481973	-1.88021016525957
unJBU_UUXHt1TXhzR4	NHLRC2	NHL repeat containing 2	0.0481267457753027	7.27708817428379	3.09040938034056	0.00287196371949988	0.0908754698885652	-1.88441623973213
36udlR_1Rzerk434kI	CD83	CD83 molecule	-0.0454806974403589	9.14918328596789	-3.08935754433064	0.0028809074234027	0.0909735634229883	-1.88719487361898
B7JXoXl19XapTH3v1M	TCTA	T-cell leukemia translocation altered	0.0645457615606812	6.02751371345693	3.08593386942054	0.00291019891026382	0.0916480643375005	-1.89623428394726
luSkSnKMXr3SIiQq0E	FBXO43	F-box protein 43	0.0761214422431893	4.91331022187051	3.08548716887432	0.00291404110014535	0.0916480643375005	-1.89741313796552
WCMR157lVN.XUB15e4	CS	citrate synthase	0.0381758071698044	10.9556793225562	3.08377338872268	0.00292882569752898	0.0919164546208219	-1.90193466007596
HoRQmVzvn7T04brfok	WWC3	WWC family member 3	0.0824798073917863	6.64606710664875	3.08313126476032	0.00293438321856041	0.0919164546208219	-1.90362831159395
ZdMR2zjH2Ee98nQ4k4	SMAD7	SMAD family member 7	-0.0860557416546196	5.67261888586321	-3.08182474028991	0.00294572142540301	0.0920863276117952	-1.90707355407807
0Ufe1T9FKOHCkJ1e6U	SNRNP40	small nuclear ribonucleoprotein U5 subunit 40	0.0499443336378033	9.31330019792806	3.07871958776195	0.00297283245100823	0.0927476064074071	-1.91525729645779
3qXJ0USRNdSjcl9zcU	NME6	NME/NM23 nucleoside diphosphate kinase 6	0.0550327376810326	6.87914974157997	3.07724272744972	0.00298580833397445	0.0929054082682088	-1.91914744271475
0df5KUyhyVBziAye94	MRPL52	mitochondrial ribosomal protein L52	0.0545204610756408	6.62095117760606	3.07678667811673	0.00298982589557892	0.0929054082682088	-1.92034842319472
oRnXe9LZArgR05pUlM	PIN1	peptidylprolyl cis/trans isomerase, NIMA-interacting 1	0.0349321053547141	10.1067366521199	3.07376137721489	0.00301660507168646	0.0935508122629778	-1.92831199957802
6dU93LHnVcVJLR9S9M	BBS1	Bardet-Biedl syndrome 1	0.0644173006568192	6.04127332582401	3.07227656272876	0.00302982987286733	0.0937741380930389	-1.93221836132074
KtNSHHYDptZd5_1r9Q	NAPSA	napsin A aspartic peptidase	-0.131745203158466	7.43837554619724	-3.06903114504315	0.00305892413868866	0.0941490211748087	-1.94075171117968
Bv7opnt7V3tXe79SU0	CLPTM1	CLPTM1, transmembrane protein	0.0403500435193736	7.29054214784412	3.06888791452735	0.0030602141377314	0.0941490211748087	-1.9411281585843
xXfVRXtXsgBS4JKxok	ARHGEF11	Rho guanine nucleotide exchange factor 11	-0.0924829020114255	4.37232327248655	-3.06850278422597	0.00306368530994568	0.0941490211748087	-1.94214031661989
r4BkWB9RneetLpp7Vc	DPP9	dipeptidyl peptidase 9	0.0615031431208306	7.31376258108167	3.06762760931377	0.00307158688734432	0.0941490211748087	-1.94444000198854
cS01fjF56s_vUkd7iU	ZNF443	zinc finger protein 443	-0.0728131144796208	6.15545877638461	-3.06756196899976	0.00307218029013379	0.0941490211748087	-1.94461246427039
WKlwUl_os_HrV8XfOk	TSC22D3	TSC22 domain family member 3	0.0968538128880076	7.47730635994916	3.06387050935878	0.00310572428450679	0.0949900111222039	-1.95430687579891
lpflJe7n7qBF_xeJ8Q	CSRNP1	cysteine and serine rich nuclear protein 1	-0.0741002427408112	9.09738678283589	-3.06265832666514	0.0031168134804518	0.0951422593405366	-1.95748836108944
KURKrov3hgrXCou.u0	EDN1	endothelin 1	-0.0799558641173594	6.4109314488572	-3.06143879745904	0.00312800708547483	0.0952970925766579	-1.96068817148323
6ut9ioyRiut4ShwR8U	TIMM23	translocase of inner mitochondrial membrane 23	0.0423049491552462	9.54438865126118	3.05872994885133	0.00315300466439968	0.0953565979436352	-1.96779223609736
rCn3eU16I1b1pzq6JY	PNKP	polynucleotide kinase 3'-phosphatase	-0.0474756989742427	8.37344626035214	-3.05865759255065	0.00315367492070225	0.0953565979436352	-1.96798192845113
0VqIAho6SjUKpyej_8	SYK	spleen associated tyrosine kinase	-0.0468320191824564	9.01142592717687	-3.05838879398411	0.00315616603778434	0.0953565979436352	-1.96868659259014
o364rIkHg5AnXEkDUo	C21orf91	chromosome 21 open reading frame 91	-0.0478266466576084	6.86151378912327	-3.05799658862908	0.00315980412666075	0.0953565979436352	-1.9697146879031
ZK3XeorfpYdKhcJRvA	PSMB8	proteasome subunit beta 8	-0.0360453943008056	10.6149514585375	-3.05791234171364	0.00316058610861483	0.0953565979436352	-1.96993551297301
QiO0UowhRKgkCCgiJ0	MLX	MLX, MAX dimerization protein	-0.093862530783534	4.6331472901937	-3.05673830449581	0.00317150232013418	0.0955008667695336	-1.97301238115744
TdR.nr0l9u6desG6dQ	SLC2A5	solute carrier family 2 member 5	-0.160023189329599	9.15773127681673	-3.05385274899968	0.00319848159082055	0.0961273386214175	-1.98057094077637
NJQtGpKWS69_bpev88	TMEM175	transmembrane protein 175	-0.059503395183015	7.64997873581984	-3.05252130638975	0.00321100216969162	0.0963176912866266	-1.9840567690925
N56fuXfHO6.rTzIw5U	SRI	sorcin	-0.0813787509001781	7.07865448234553	-3.05169597247053	0.00321878630979684	0.0963268296268841	-1.9862169867662
uCSh5POkf_X66VH91M	CANX	calnexin	-0.0402249036475969	10.0656617500824	-3.05117786655691	0.00322368179827894	0.0963268296268841	-1.98757284491521
HIXrpEnSp50S4KQxR4	CCT2	chaperonin containing TCP1 subunit 2	0.046055224767454	10.5782555870221	3.04921068369122	0.00324233253282371	0.0966985304042137	-1.99271928546142
rpzl_RErvrjqnviOXs	ITGB5	integrin subunit beta 5	0.0979957629691362	5.58656618539834	3.04781369411144	0.00325563823184506	0.0969097055322445	-1.99637249500061
fi6R4weuCXElNZUAt4	AHI1	Abelson helper integration site 1	-0.0952505999069144	5.25694980327502	-3.04392796716278	0.00329291576552761	0.0977591009907282	-2.0065272496294
ZpdcRcXd3qfc.YWY44	FTL	ferritin light chain	0.0395048965361577	13.0984327545312	3.04323089612741	0.00329964495389976	0.0977591009907282	-2.0083479031677
riklHTo9C16dZd9TSg	MRPS12	mitochondrial ribosomal protein S12	0.0512572452235755	8.30380515162151	3.04288262751874	0.00330301176266206	0.0977591009907282	-2.00925741477174
WlAitRBSu5HvR5JU.k	POLR2D	RNA polymerase II subunit D	0.0391503283719303	8.22542283673659	3.0414723927664	0.00331667759406159	0.097887095912214	-2.01293947154514
HdefXV5T01eVd1OCfg	OAS1	2'-5'-oligoadenylate synthetase 1	-0.0740305536800558	8.85336513798761	-3.04084251521167	0.00332279837999849	0.097887095912214	-2.01458363547667
Te_l.fJf.e.U9LnUJk	POLE3	DNA polymerase epsilon 3, accessory subunit	0.0493497447737881	10.534751453116	3.04049297983946	0.00332619949496154	0.097887095912214	-2.01549591356909
0dVAtCQiHL4Ki96pSk	CD53	CD53 molecule	-0.0438600538486421	9.64375921115248	-3.03964303914939	0.00333448326552948	0.097945727316534	-2.0177139055223
rSCnSC147iiK5qiE9Q	MERTK	MER proto-oncogene, tyrosine kinase	0.0834227252946965	4.88050223876119	3.0369087736733	0.0033612625800832	0.0984925521212778	-2.02484602089339
cV1IC9EGk6OF0.yOpE	GOSR2	golgi SNAP receptor complex member 2	-0.0453244506718594	7.80339114862646	-3.03645230286627	0.00336575268040338	0.0984925521212778	-2.02603621597147
NNW3X1QnVp.9w0pKbc	MSC	musculin	0.0601486329743453	8.04764687627229	3.03465440988975	0.00338349207111293	0.0987435703515315	-2.03072269823052
xCh31FIjqAFHqihyhU	PDIA3P1	protein disulfide isomerase family A member 3 pseudogene 1	-0.0727794838305771	6.71162569861615	-3.03310576896071	0.00339884182114603	0.0987435703515315	-2.03475778282285
QVSvQFI6jXiJ.iKu_U	SVBP	small vasohibin binding protein	0.0447360807646997	8.46925530103894	3.03300503840727	0.00339984247758874	0.0987435703515315	-2.03502018881862
3JfdKQnsxy8et1HlOU	CDC23	cell division cycle 23	0.0359130863697952	9.56484724821627	3.03221618483465	0.00340768842173921	0.0987435703515315	-2.03707494694918
iLnld6oTmi6q3zV7ng	GRINA	glutamate ionotropic receptor NMDA type subunit associated protein 1	-0.0496034367704284	8.36584844440902	-3.03210100579309	0.00340883540118062	0.0987435703515315	-2.03737492449989
3V0SVUADeQVL8WtnFM	NAXE	NAD(P)HX epimerase	-0.0398227341912356	8.86474080493183	-3.03148078310783	0.00341501789583932	0.0987435703515315	-2.0389901124232
Nch7fc415X0iOCp_qo	HSPA7	heat shock protein family A (Hsp70) member 7	-0.0834666459752774	5.47607051450589	-3.03110891657299	0.00341872972889745	0.0987435703515315	-2.0399584096634
Kvcv3oKwl6iETCQ9Hk	IBTK	inhibitor of Bruton tyrosine kinase	-0.0450439693892453	8.75848046969041	-3.02911345758184	0.00343871181726894	0.0991367880948941	-2.04515281612622
xl7UnV3VQgEE4OJB9I	GBP2	guanylate binding protein 2	-0.0361923411230142	10.3539683743406	-3.02476834368209	0.00348259909917962	0.0999571476197271	-2.05645467276814
lLhQjHTur6HlShEkjk	AK2	adenylate kinase 2	-0.0482733846029395	6.61428765963134	-3.02467094183219	0.00348358883533976	0.0999571476197271	-2.05670787886758
rJQp6Hq_nku678ujFE	TNFRSF14	TNF receptor superfamily member 14	-0.0592744442568432	11.5273197201008	-3.02426737119592	0.00348769245243293	0.0999571476197271	-2.05775693625032
N6h32CEUN7mc9GcBm0	HIST1H3C	histone cluster 1 H3 family member c	0.0757485560546629	5.68342167136154	3.02376078034443	0.00349284996821246	0.0999571476197271	-2.05907363817246
xjYvpYo6OPukkglvkk	HAUS7	HAUS augmin like complex subunit 7	0.0480315274907013	8.40337880838882	3.02044955146495	0.00352673603242562	0.100741700096884	-2.06767587330515
6UKFA16L3VB.Io6Aqk	SKA3	spindle and kinetochore associated complex subunit 3	0.0546386342171901	6.90142240539811	3.01893113685881	0.00354237696832986	0.101003158686739	-2.07161816780107
3XrQuenee1_X1P1XeQ	ANG	angiogenin	-0.0672298598864322	6.70170950212477	-3.01214263464388	0.00361309575443729	0.102831215182961	-2.0892248991778
uaQtLs2P3LnuC0lXgg	GPR183	G protein-coupled receptor 183	0.0519829845949623	10.3897506605117	3.00813711544699	0.00365543601988052	0.103846401382299	-2.09959952437075
rV99EXHR.EH_dcHur4	MLLT11	myeloid/lymphoid or mixed-lineage leukemia; translocated to, 11	-0.0520901170684371	8.59999553532489	-3.00672760295105	0.00367044454665709	0.103952567977456	-2.10324778056809
EpBIouKLnnsjhBdT3M	SAT1	spermidine/spermine N1-acetyltransferase 1	-0.052801796292331	11.2092807866471	-3.00653238174248	0.00367252777412648	0.103952567977456	-2.10375297114131
TnXnV6gC6bOleJ6n8w	MAFF	MAF bZIP transcription factor F	-0.0973978238105795	5.08929974544825	-3.00392764030327	0.0037004285429279	0.104552216980583	-2.11049109425368
c5LgdSIXKo7p7tpJCI	TSEN34	tRNA splicing endonuclease subunit 34	0.0677633578088066	7.49665373396325	3.00272383812032	0.00371338950596294	0.104648943380391	-2.11360366997162
uegI9qIR.liqOCeI44	CCDC77	coiled-coil domain containing 77	0.0478604004737296	8.19241841512519	3.00221100042202	0.00371892386438066	0.104648943380391	-2.1149293851609
o95RDhNSgqBN_ed0iU	CHKB	choline kinase beta	-0.0594267730925671	6.64607118838142	-3.00173956736799	0.00372401815472358	0.104648943380391	-2.11614791483843
HK.zqKe5PnQCe_oGX0	UBE2J1	ubiquitin conjugating enzyme E2 J1	-0.0362456412914564	10.4906062603043	-2.99819944106922	0.003762480171931	0.105513757968685	-2.1252935473109
ipXV5HVd_ebvj_ikeQ	ATP6V0B	ATPase H+ transporting V0 subunit b	-0.0411738432276844	9.7612696853222	-2.99766226452626	0.00376834849888162	0.105513757968685	-2.12668058130809
uf5.f5EO3_vkLTCXik	SMARCA2	SWI/SNF related, matrix associated, actin dependent regulator of chromatin, subfamily a, member 2	0.04697142168985	10.5692825262578	2.98854099689415	0.00386929887339211	0.108145861509818	-2.15020350906304
NV_OeqTWr6jojKKN0s	GTPBP3	GTP binding protein 3 (mitochondrial)	-0.0605606693981467	6.16194359862316	-2.98649347844624	0.00389230221541667	0.108593836719725	-2.15547635599516
rPedae6aulaNNDqPNM	HVCN1	hydrogen voltage gated channel 1	-0.0526743961116258	7.57325067391477	-2.98477836332624	0.00391166868883455	0.10883004818943	-2.15989106113879
c5SBEIRQPgdHn.ik3o	NR2C1	nuclear receptor subfamily 2 group C member 1	-0.0767446562031264	6.40565483005406	-2.98405188524321	0.0039198987454726	0.10883004818943	-2.16176043114847
rr5wo6ngnqt6F9DQJc	PTTG1	pituitary tumor-transforming 1	0.0434087208278709	10.3656445125554	2.9838894996343	0.00392174055975529	0.10883004818943	-2.16217823349897
fp3_eev4PoRHnmnXXk	BRF2	BRF2, RNA polymerase III transcription initiation factor 50 kDa subunit	0.0614849621777773	6.46154340947415	2.98226802171271	0.00394017581439043	0.109147076652011	-2.16634918532014
KgPSFRJQldeK__pd3o	DDX56	DEAD-box helicase 56	0.0515239012548891	8.14512824180395	2.97819538507991	0.00398683443340975	0.110075393552679	-2.1768176456645
EQiIRdQfYQIvRSEl7o	PRKCB	protein kinase C beta	-0.0567432272457835	8.61434852873416	-2.97810905515327	0.00398782900589099	0.110075393552679	-2.17703943299415
NjlXhNNPfuohJJezus	CHKA	choline kinase alpha	0.0480473460163724	7.74367795661901	2.97299505261146	0.00404715761554794	0.111388997606009	-2.19016886876846
x9dVnlVRhXF_ClVEDA	ISYNA1	inositol-3-phosphate synthase 1	-0.074081696092885	5.50934570487855	-2.97277502627907	0.00404972845869741	0.111388997606009	-2.19073336590286
W3f95d8TuDviVENBLo	PRDM1	PR/SET domain 1	-0.053120860086717	8.49538899532559	-2.97044099058157	0.00407709330394207	0.111901148809289	-2.19671957245909
Qn5VH0iv_q9Kue7dV8	PLPPR2	phospholipid phosphatase related 2	0.105035066194242	4.5148881192253	2.96996250389267	0.00408272433990726	0.111901148809289	-2.19794632405666
QkELSU0lEUmgOfKiCU	ZNF589	zinc finger protein 589	0.094464962641464	5.30874315270824	2.96879711494797	0.00409646931547621	0.112080552378442	-2.20093353292685
0lKXO_iovAxe5NUkmg	DUSP22	dual specificity phosphatase 22	0.0618243620294675	7.42164611107368	2.96799804819458	0.0041059185458178	0.112141999861915	-2.20298123927756
K_uqerFDnkrQSc56yk	IL15	interleukin 15	0.0619362240709669	7.62581003234407	2.96467976736509	0.00414537489697296	0.113021359712916	-2.21148021984686
rh5E35fvXrVEiIM1LE	CCDC26	CCDC26 long non-coding RNA	0.103018531889868	5.0471664186004	2.9633943167257	0.00416075389387857	0.11324233674808	-2.21477063456943
912hWIFYA_UKFTXo00	PITRM1	pitrilysin metallopeptidase 1	0.0560424042239796	7.56390527430896	2.96200492999971	0.00417743582423024	0.11349794225413	-2.21832586750145
rM5qLo7EJ5TeX3pATo	SEC24B	SEC24 homolog B, COPII coat complex component	-0.06248212278328	5.82961478184733	-2.95967722752177	0.00420552278919639	0.113780741657272	-2.22427924351504
N171iSSjyeguHw0Sd0	DONSON	downstream neighbor of SON	0.0527472788598032	6.02640870450411	2.95946633096357	0.00420807617559502	0.113780741657272	-2.22481845911039
xT1gep2ko32d32XehI	NLRP7	NLR family pyrin domain containing 7	-0.140625800272882	4.82333261020163	-2.95932645366769	0.00420977050324954	0.113780741657272	-2.22517607798125
oXUkKUoEd90UgBThSk	EDEM2	ER degradation enhancing alpha-mannosidase like protein 2	-0.0463332978651883	7.39197339805404	-2.95631953870699	0.00424634633299784	0.114570398114576	-2.23286060342881
NUMU4L0p7jep1eH94I	DGUOK	deoxyguanosine kinase	0.0393649367774186	10.6537370953578	2.95166264746568	0.00430357378107351	0.115856598949624	-2.24474999475445
ZumFCGP95fIkKj0V1k	LAG3	lymphocyte activating 3	-0.0676085490991171	7.4515720086603	-2.95123206726424	0.00430890100153085	0.115856598949624	-2.24584857077385
Tn3XOK58qeTfr.KFHs	AGMAT	agmatinase	0.0697814895686927	5.32237079581244	2.9506071783302	0.00431664311154364	0.11586465510433	-2.24744268412503
ojLV_BETnlid6ABVEk	UBE2C	ubiquitin conjugating enzyme E2 C	0.048328567944867	10.3781373862043	2.94912641684307	0.0043350405877001	0.116158195988494	-2.25121912194358
xWV.oC0qTYGn01zkv4	MED7	mediator complex subunit 7	0.0547902297892476	7.25873945142743	2.94680635849277	0.00436401184061174	0.116733567585298	-2.25713311649493
u3QvlU0l6KgqeolOBM	FMC1	formation of mitochondrial complex V assembly factor 1 homolog	0.0667778125144486	6.41675978302886	2.94112432710863	0.00443572394478203	0.118448285372842	-2.27160189314591
ZvGex87PV7F4Efvnl0	FAM117B	family with sequence similarity 117 member B	0.052038117912755	8.34276358543098	2.94022822665307	0.00444713258758159	0.118549589252517	-2.27388176884181
NoEh4gqQE9eonqQojU	NR1H3	nuclear receptor subfamily 1 group H member 3	0.0597760785125266	5.91352325065715	2.9387470713701	0.00446604938570425	0.118850353566912	-2.27764897887193
iIteqJ97UXteSKLb9Q	CD151	CD151 molecule (Raph blood group)	-0.0823204191689618	4.83615127377862	-2.93785791428177	0.00447744113804274	0.118950176855033	-2.2799097824025
oiUpRFtdJLtO7wAZQk	ALG2	ALG2, alpha-1,3/1,6-mannosyltransferase	-0.0872666426135206	5.0849509170318	-2.93680757839383	0.00449093253737098	0.119105345386357	-2.28257972593228
rTS8juqHQ0RnfQtadU	FILIP1	filamin A interacting protein 1	0.066575077308687	5.02772055035245	2.93461418804353	0.00451922769826322	0.119651933344493	-2.28815292988902
Ha6KVKb5yj5NL.Xv5E	MID1IP1	MID1 interacting protein 1	0.0581244117357026	7.35055887104261	2.93322844241689	0.004537189031487	0.119777962120205	-2.29167232781405
HIky7_py6v3hJU6g5U	GCNT2	glucosaminyl (N-acetyl) transferase 2, I-branching enzyme (I blood group)	-0.0595282758665306	6.40823956975275	-2.93306010025468	0.00453937549145176	0.119777962120205	-2.29209978148917
rR5P6kU3SdX5NSuSTo	IL27RA	interleukin 27 receptor subunit alpha	0.0559453337928656	8.38508269806403	2.93130448266708	0.00456223596155916	0.11982317638426	-2.29655651028627
WKnkqXVF9QSEp3ns3s	TDP1	tyrosyl-DNA phosphodiesterase 1	0.0556853501076209	6.54800295715029	2.93113131697755	0.00456449657069733	0.11982317638426	-2.29699598909341
KeO7d0SfgCXiEnt_4o	HLA-B	major histocompatibility complex, class I, B	-0.0425843817777376	12.2175158334931	-2.93054743223713	0.00457212659462519	0.11982317638426	-2.2984776879564
0uV.wr4VLn8IpwRIKs	SNORA26	small nucleolar RNA, H/ACA box 26	0.0839443736933274	5.10005982071119	2.93033027355211	0.00457496736603138	0.11982317638426	-2.29902870398766
T728pBJxPt56v0pxeg	MIR221	microRNA 221	-0.11058197101396	4.39304209740827	-2.9299784797739	0.00457957283842722	0.11982317638426	-2.2999212747478
NGgJNd1Avon3PlOBTk	BMPR1A	bone morphogenetic protein receptor type 1A	-0.054241327474254	6.60033595690067	-2.92736252403083	0.00461395412589419	0.120520197704565	-2.30655588057778
0Ru18EXjelQnm5X8JQ	AK1	adenylate kinase 1	-0.0930806941185806	4.76055373948457	-2.92503703239178	0.00464471818861506	0.121120557387537	-2.31244996793623
x4gMJOgM8nlW3lPRSg	THAP10	THAP domain containing 10	0.0574095768105266	6.2458747940877	2.92407317262211	0.00465752467298858	0.121251411553656	-2.31489186354013
3dInTyE2iL05SAIl9U	ZNF232	zinc finger protein 232	-0.0565294269923539	6.62338392611793	-2.92137451067859	0.0046935548276362	0.121985411613757	-2.3217254954551
9Jd97nm3QdLiQXEuzE	INVS	inversin	0.04889431935739	7.27647698332974	2.92063332878806	0.00470349545654618	0.122040028779185	-2.32360148478793
TSNBBV1W2wGeKDjukI	PNISR	PNN interacting serine and arginine rich protein	-0.0590635908444906	9.62816792283777	-2.91745049191469	0.00474640493122093	0.122948472494588	-2.33165331060313
T3dVJV6QUU9.e3e4.I	DYDC2	DPY30 domain containing 2	0.0868797570104154	4.53921958917593	2.91554652447635	0.00477224602227114	0.12327816980571	-2.33646665313315
9ppN.B6XUdDqAeHZe4	POLR2H	RNA polymerase II subunit H	0.0393878631947228	11.0124675007199	2.91481371158757	0.00478222654759217	0.12327816980571	-2.33831859970729
c64oVUSfcfV6EvZfdQ	RARRES2	retinoic acid receptor responder 2	0.103162329020112	4.58622254316174	2.91470724902913	0.0047836781157713	0.12327816980571	-2.33858761928255
9iDZ_B4pIpxLi6I0ZQ	DENND4C	DENN domain containing 4C	-0.0438242106154055	7.99882055722972	-2.91374368898041	0.00479683435311969	0.12327816980571	-2.34102208734872
6nFOFDt98hbv9Si7dE	PPP2R3C	protein phosphatase 2 regulatory subunit B''gamma	0.0433398645079241	9.44581221154181	2.91360532479659	0.00479872629125516	0.12327816980571	-2.3413716181408
NJHXLd6XujUuc97RQU	MYO5C	myosin VC	0.0728061187992089	5.4507842191041	2.91204997161288	0.00482004109640914	0.123621745945465	-2.34529981343113
EAFkjpF1bdI1IASUqU	CDCA2	cell division cycle associated 2	0.0603822426528995	7.5037626457016	2.90866518852537	0.00486672947219513	0.12443606764649	-2.35384279861844
fgHz2QyEC4JZISS19I	RLN2	relaxin 2	0.0773242613504427	4.83376584264147	2.90858953069805	0.00486777782609919	0.12443606764649	-2.35403366642274
fHgJLTmDoq537snrSo	CPEB4	cytoplasmic polyadenylation element binding protein 4	-0.0746931067527235	5.96627176282875	-2.90563834429035	0.00490883419719379	0.125118633921296	-2.36147584939885
x_peKJ5e_6lJ59h558	TEX10	testis expressed 10	0.0427017683096445	8.08999930518656	2.90551530988891	0.00491055275731706	0.125118633921296	-2.36178598547697
6XxHTVNzntCp56_ues	AP3M1	adaptor related protein complex 3 mu 1 subunit	0.042590562019862	8.51158620600921	2.9034153919834	0.00493997052552164	0.125662518204773	-2.36707773468946
HzpV5fVKLEVQSRXdSM	FCER2	Fc fragment of IgE receptor II	-0.0561928027047084	10.4976097377263	-2.90229686196448	0.00495570640202521	0.125857157041971	-2.36989519619305
3tAR_4f_fw9Tg715dc	ACSL4	acyl-CoA synthetase long-chain family member 4	-0.0565072568846672	9.29904589251187	-2.90154441998955	0.00496631806196927	0.125921237115208	-2.37179004611187
Tu3UlRH1K6SJid3PHo	PPP2R5C	protein phosphatase 2 regulatory subunit B'gamma	0.0429517694481372	9.4791984347273	2.89836285216077	0.00501142002158041	0.126858190074738	-2.37979787108022
0_DHz7_krTURH3lVHk	GIMAP4	GTPase, IMAP family member 4	-0.109434991370305	5.28835314461116	-2.89690131678879	0.00503226532593285	0.127179069146303	-2.38347418719686
u5fgvxfueiJfOMHUCE	TMEM200A	transmembrane protein 200A	-0.0654157935029376	7.19194333559576	-2.89335669352422	0.00508315395302411	0.128256954198832	-2.39238428026244
0tfFE.0kdJEuX7swyk	RCBTB2	RCC1 and BTB domain containing protein 2	0.0832772791998331	6.0200211724401	2.89073021533898	0.0051211672087391	0.12900700826157	-2.39898097352591
HxeZJpXhxh9mZxaJEs	C19orf60	chromosome 19 open reading frame 60	0.0509535550548183	7.12903531219851	2.88924163020528	0.00514282799371731	0.129343370284638	-2.40271765443784
0qhe.l11HcwktN_ohY	POLDIP3	DNA polymerase delta interacting protein 3	0.0358660197233152	8.13883364377571	2.88773850071761	0.00516478621399406	0.129686115773322	-2.4064893268614
lEo1VIhVP5d0EdIX0E	SF3A3	splicing factor 3a subunit 3	0.0404413395429596	9.83905021856485	2.88622033492406	0.00518705191037054	0.129988848544855	-2.41029717958057
9kK0eUDIVuxDiieqXU	ASS1	argininosuccinate synthase 1	-0.0811944174580722	5.62697454156528	-2.88577893792749	0.0051935421245439	0.129988848544855	-2.41140399622567
QSd8KRy1fEihTnh41M	IFNA2	interferon alpha 2	-0.0939170185329927	5.63292343073412	-2.88346024782667	0.00522775896045596	0.130635235146675	-2.41721602082315
ZuTRHwdNwefVaEV1F0	UFC1	ubiquitin-fold modifier conjugating enzyme 1	0.0347573593691664	9.97205789549545	2.88208587251729	0.00524813865829637	0.130934331141599	-2.42065931178415
K5WlOenU0OC6f1FeOI	SNRNP40	small nuclear ribonucleoprotein U5 subunit 40	0.0549446555299084	8.54805357461363	2.88122289421466	0.0052609726344202	0.131044515156246	-2.42282072138618
B157U7P3256g16V7VE	HM13	histocompatibility minor 13	0.069096863426078	6.8518251799884	2.87798614204046	0.00530936717066943	0.131902752976743	-2.43092297927954
QeYyFIANekn.dSk3q0	HEBP1	heme binding protein 1	0.0778905953857709	5.41142134237119	2.87572885018022	0.00534335997293712	0.131902752976743	-2.43656924793039
rUtJ6Uj9dHF5TkxOeY	CDH17	cadherin 17	0.119197749508667	4.54335231087582	2.87565642320346	0.00534445397559515	0.131902752976743	-2.43675035573451
HLtwgbPV.EZ43XLogo	CEP128	centrosomal protein 128	-0.0672139775972627	5.81114935023936	-2.87563814012625	0.00534473017241495	0.131902752976743	-2.43679607305457
KehCfE310lN.uLX0Ik	TNFSF4	tumor necrosis factor superfamily member 4	0.0578474563339077	8.04748199753799	2.87563524934295	0.00534477384379394	0.131902752976743	-2.43680330151423
BSeoXozSTRkQVCZACU	KIF23	kinesin family member 23	0.0550650148103198	7.53451715300266	2.8755168278202	0.00534656313364583	0.131902752976743	-2.43709941196055
uJ6tZVpdIvmQwO8WFM	CCDC151	coiled-coil domain containing 151	0.128339463772491	6.39792173946993	2.87497634136074	0.00535473663163552	0.131902752976743	-2.43845076597034
3STtKUo88qI9dgHLu4	MRPL35	mitochondrial ribosomal protein L35	0.0526412685134466	6.73093218502882	2.87440439295849	0.00536339846345873	0.131907404864337	-2.43988056729542
E_roki2f4JfvWNw9z4	UPF3B	UPF3 regulator of nonsense transcripts homolog B (yeast)	0.055008831876163	8.20697821268252	2.87280293315329	0.00538772046302969	0.132296580707328	-2.4438828421776
EW12N7GA7gO.KhN1Oc	WRB	tryptophan rich basic protein	-0.053121311266619	7.16415753610749	-2.87204119247128	0.00539932498509605	0.132372742311772	-2.44578592984385
x3lPl3t9fqkXSd6OcU	CCNT1	cyclin T1	-0.0458875162457055	8.66111384487131	-2.87143092886882	0.00540863850037755	0.132392585179053	-2.44731029229037
Hd1yqCDNEpwybr6q4I	RAB11FIP1	RAB11 family interacting protein 1	-0.0671219056226904	5.98616260402203	-2.86962808486698	0.00543623914682758	0.132859295192797	-2.4518120965636
Wl.OUlYReew_q5OJzo	JADE1	jade family PHD finger 1	0.0505186827762699	7.42794488679057	2.86500228735161	0.00550765307712475	0.134393641229903	-2.46335288542849
0jkhEFPkpUXG6zO0VI	ZNF823	zinc finger protein 823	-0.0451309781171883	7.22629756112977	-2.86365012550066	0.00552869078823012	0.134695865713876	-2.46672361611223
EYZxSf3hd4ffoCJLVo	PAAF1	proteasomal ATPase associated factor 1	0.0369352428020572	8.69535874566063	2.86234960843764	0.00554899484750026	0.134785820825576	-2.46996443213689
E4UINIJUKrE.Pn8N5E	PHF3	PHD finger protein 3	-0.0647601546254586	5.92901191982828	-2.86213464938551	0.00555235746432516	0.134785820825576	-2.47049998739804
ZoUnhK0Lul.3rf4ETQ	CMBL	carboxymethylenebutenolidase homolog	0.0639753418495171	7.56288561538193	2.86175143993447	0.0055583566912911	0.134785820825576	-2.47145464870136
ThXoftPP7eqpHq4J4I	GMPPB	GDP-mannose pyrophosphorylase B	-0.0588918631300921	7.37284627243078	-2.86074787486054	0.005574096044674	0.134867289468408	-2.4739542828631
fUnl3Tsft76qfu_NKI	SMIM11A	small integral membrane protein 11A	0.0548016637956511	7.3003429958192	2.86038866686293	0.00557973963836041	0.134867289468408	-2.47484881533674
0epSD9AaXRyn3r45e4	NOD2	nucleotide binding oligomerization domain containing 2	-0.0823424004624063	7.1503231777129	-2.85940399219688	0.00559523709010847	0.134867289468408	-2.4773004918603
3p46XcX_zUogHkiSV4	TMEM2	transmembrane protein 2	0.0683526809718994	6.17697369743408	2.85933218627611	0.00559636876905137	0.134867289468408	-2.47747925088594
96z_pJ642_tWmV.fx4	RNU11	RNA, U11 small nuclear	0.147878005145444	7.50906844861307	2.85775739867485	0.00562124091604176	0.135257308471311	-2.48139876270559
Qey89S8cvx7SKnl.9I	DNAJC10	DnaJ heat shock protein family (Hsp40) member C10	-0.0442573861966464	8.65668628358348	-2.85418532142999	0.00567803625823866	0.136336045132962	-2.49028310067411
BaRT4sTmIV4YUsQnRo	LSM7	LSM7 homolog, U6 small nuclear RNA and mRNA degradation associated	0.0389134498152219	10.0504957317984	2.85338133664516	0.00569089214419081	0.136336045132962	-2.49228154378079
HCueIJRagJJSRAqVKA	ARFGAP1	ADP ribosylation factor GTPase activating protein 1	0.0838337625879041	4.77054431535764	2.85329057330035	0.00569234515264807	0.136336045132962	-2.4925071240943
cKUjz5.on9zKxyU1bY	FAM172A	family with sequence similarity 172 member A	0.0517384911134505	7.7626981385778	2.85273305823648	0.00570127777723968	0.136340234156785	-2.49389263106791
lX0VIRusqOgCj30SJE	PHF5A	PHD finger protein 5A	0.0534035279276058	6.41592770846484	2.85135965899935	0.00572333779210094	0.136613663801996	-2.49730482666289
HNBEr.yuvV55Em4Xbo	IPPK	inositol-pentakisphosphate 2-kinase	-0.0753313514386802	4.94425129538646	-2.85062723488536	0.00573513436654875	0.136613663801996	-2.4991240008194
rXq1RKEll_Tvz4KO.k	SEMA7A	semaphorin 7A (John Milton Hagen blood group)	-0.0749122920664825	6.46699437785457	-2.84961909721091	0.00575140827609389	0.136613663801996	-2.50162738627385
ZesPTAlKJDf5foHe5I	CCDC34	coiled-coil domain containing 34	0.0440358650307384	8.1654418622428	2.84812280378022	0.00577564069610403	0.136613663801996	-2.50534167160505
3gRRofXYRTQiQXoSJU	IDH2	isocitrate dehydrogenase (NADP(+)) 2, mitochondrial	-0.0505014094636319	9.13362788144824	-2.84772855835836	0.00578204112193908	0.136613663801996	-2.50632006232181
ZJScXde5eUdDAS7eZU	GPR137	G protein-coupled receptor 137	0.038609860670014	9.67502281847775	2.84762915017716	0.00578365600728345	0.136613663801996	-2.50656674481029
NC5L33UXKFlJImqo3U	PA2G4	proliferation-associated 2G4	0.0436513761028016	10.0759830885871	2.84718982580454	0.00579079780524269	0.136613663801996	-2.50765685229848
9e.eSqOM_uL5QIJDEk	WSB1	WD repeat and SOCS box containing 1	-0.0705740497393909	8.8675180935717	-2.84715623612033	0.00579134418404538	0.136613663801996	-2.50774019387382
ZHhO7uXi5SUW7gd.oo	ERN1	endoplasmic reticulum to nucleus signaling 1	-0.0643376257061131	7.71121369125975	-2.84645219460847	0.0058028072450182	0.136613663801996	-2.50948686038837
rCOmieZudsntCKtNhw	ETFB	electron transfer flavoprotein beta subunit	0.0594022768788106	8.61393522227298	2.84569067341603	0.00581522970154132	0.136613663801996	-2.51137574819286
ihxKwUAUSAqAf6OKqk	POLR2K	RNA polymerase II subunit K	-0.100388541822628	4.88638529471002	-2.84475696294437	0.00583049445118735	0.136613663801996	-2.51369119642505
iEL0uU4LOJCkannpKk	PRKCSH	protein kinase C substrate 80K-H	-0.0969448791006021	5.35953445623979	-2.8443852406901	0.00583658180904949	0.136613663801996	-2.51461284075193
iUkJ2v4MbR8UuU_ShU	RGS20	regulator of G-protein signaling 20	0.13982217299581	7.30091534740303	2.84423264850367	0.00583908236673294	0.136613663801996	-2.51499114893051
Z1bpf1V.pJFjoo4eog	RSG1	REM2 and RAB like small GTPase 1	-0.071605631231053	5.19142945339007	-2.84397386797184	0.00584332530873317	0.136613663801996	-2.51563268404048
BZHqfXhcJLOHigiSPk	PSMD4	proteasome 26S subunit, non-ATPase 4	0.0461397445691048	8.75168729263049	2.84391194812672	0.00584434096172466	0.136613663801996	-2.51578618090393
33dt4lVKX.Uf4qK59g	CES2	carboxylesterase 2	0.0442614964167243	8.23714817128871	2.84333685986421	0.00585378173454378	0.136629196466833	-2.51721167701504
Hus080pSeSXfl_F5PU	BORCS7	BLOC-1 related complex subunit 7	0.0476125784618948	6.660063565636	2.84192213912558	0.0058770658909775	0.136761846572844	-2.52071744494776
reSX16S4gISE7kuEp4	BEND6	BEN domain containing 6	0.0893798984856064	4.4227205053952	2.84178815417335	0.00587927549488818	0.136761846572844	-2.52104939729344
09Jkl_l2qSepVdO5S8	ADRM1	adhesion regulating molecule 1	0.0487066437060801	7.30050482792716	2.84139161660684	0.00588581945039862	0.136761846572844	-2.52203176093114
rDnkvXjiNVXdipjijk	HSP90AB1	heat shock protein 90 alpha family class B member 1	0.0451165608290171	10.9014657767881	2.84074345486344	0.0058965303353415	0.136806533920412	-2.52363725517373
fRUHoLT147nuJIOpeY	CMAHP	cytidine monophospho-N-acetylneuraminic acid hydroxylase, pseudogene	0.0614606615538769	6.06352221458216	2.83986843231678	0.00591101856702295	0.136889152104731	-2.52580422729705
T6X0eHecrrlePvpOuI	KCNMB3	potassium calcium-activated channel subfamily M regulatory beta subunit 3	0.0659754581459153	5.61848071161504	2.83896267381021	0.00592605022643914	0.136889152104731	-2.52804676494106
Wtd1NNdLuLXSJdTeUI	IRAK3	interleukin 1 receptor associated kinase 3	0.0593734393239391	6.52504449085992	2.83893739624605	0.00592647022858353	0.136889152104731	-2.52810934078364
6Luhx00tuunlOSnZTk	ECE2	endothelin converting enzyme 2	0.0770517631383633	5.34595794143006	2.83705999843684	0.00595774104773947	0.137304365196997	-2.53275570912703
lkl6jZ3GDxEoJqPat0	NLRP7	NLR family pyrin domain containing 7	-0.0757964183126003	5.6805299792786	-2.83678461658736	0.00596234068940661	0.137304365196997	-2.53343704839621
ovk1OiYniJ2IF5wpTQ	PMS2	PMS1 homolog 2, mismatch repair system component	0.0513300684917301	7.23287759463555	2.83592784848092	0.00597667200951751	0.137304365196997	-2.53555649953671
BoU0oeeWVd6IiSf.P4	MRTO4	MRT4 homolog, ribosome maturation factor	0.0545761881781451	7.45111806909728	2.83574557308305	0.0059797250516164	0.137304365196997	-2.53600734297996
B_VRVlJZjGmS9cz07w	P4HTM	prolyl 4-hydroxylase, transmembrane	0.0481823936959646	6.58087834330742	2.83472768159556	0.00599680074573138	0.137436266152468	-2.53852459714738
66uL9VXXz3teIUakCc	PFKFB3	6-phosphofructo-2-kinase/fructose-2,6-biphosphatase 3	-0.0633340819397668	8.75673146340257	-2.83417140597882	0.00600615153178545	0.137436266152468	-2.5398999717093
ZQ91Q4l.7e6gCSiGfY	ALG8	ALG8, alpha-1,3-glucosyltransferase	0.0426405260982428	8.54647326840358	2.83276582605168	0.00602983863136847	0.137436266152468	-2.54337428138545
ZgWnZRXeVrCp5UICTw	MIDN	midnolin	-0.0543917062019687	7.378567048519	-2.83174246280072	0.00604713859284746	0.137436266152468	-2.54590297750124
QSHFETfSUfTTW0glIU	AHR	aryl hydrocarbon receptor	-0.0680360902420628	5.80242078065978	-2.83141223649237	0.0060527308105248	0.137436266152468	-2.54671880249215
r5IKDro1C3Q1T9Jf2E	MGAT4A	mannosyl (alpha-1,3-)-glycoprotein beta-1,4-N-acetylglucosaminyltransferase, isozyme A	-0.0680591411809653	5.30295291338266	-2.83131318006192	0.00605440920935	0.137436266152468	-2.54696350710667
rsq9f3yNyKCxJRUeE0	TAF5	TATA-box binding protein associated factor 5	0.0498079886828251	6.94308277211663	2.82917110039404	0.0060908092503085	0.137436266152468	-2.55225356099924
EVRRxdTr70.KOfcPSU	ZNF329	zinc finger protein 329	0.043038007012334	6.50266200011352	2.82903718944471	0.0060930914529961	0.137436266152468	-2.55258416140993
Ne9J0pEqkSSK.qCa3U	SLC37A1	solute carrier family 37 member 1	-0.0546453310268249	6.5932002755916	-2.8285752603928	0.00610097000579652	0.137436266152468	-2.55372448116793
QlFCO73Xx1N11UBGdQ	BCAS1	breast carcinoma amplified sequence 1	0.108159936778697	5.30987766764932	2.82846017310293	0.00610293436540572	0.137436266152468	-2.55400856331263
3iCeVSimOy66AgikiI	DHDDS	dehydrodolichyl diphosphate synthase subunit	0.0607002306972285	5.99647211755022	2.82844942557567	0.00610311783855226	0.137436266152468	-2.55403509210868
BPTlfhTuvn6IXqt95I	EPB41L5	erythrocyte membrane protein band 4.1 like 5	0.0710474744465808	5.6898854499965	2.82834234623324	0.00610494608819302	0.137436266152468	-2.55429939844481
ZqjigghBw5Rn9R7u8E	DNAL1	dynein axonemal light chain 1	-0.0598469778452117	6.20091012469716	-2.82831623794011	0.00610539193197023	0.137436266152468	-2.55436384093672
E141.iJ4aDd43Ukh_I	TDRD12	tudor domain containing 12	0.0858117494045976	4.49611829736383	2.82810131672156	0.0061090632179797	0.137436266152468	-2.5548943082168
WSXeo6PHo_8AEnqkWk	CTSC	cathepsin C	0.0523274672274691	10.0186829351542	2.82728193795887	0.00612307849304508	0.137437780769166	-2.55691640347778
ZQULXjokIpUZcqjkIE	SEPT3	septin 3	-0.105369471803632	4.84356204700519	-2.82706541583369	0.00612678698958128	0.137437780769166	-2.55745066842093
um0iUnihKfl6H3sIyg	ACKR3	atypical chemokine receptor 3	0.097931735173136	5.7502987519667	2.82640848923946	0.00613805119073717	0.137492346672513	-2.559071427706
igXug_iilP0dXgVJeE	CCL22	C-C motif chemokine ligand 22	-0.15685025108589	10.9981027827938	-2.82509574321653	0.00616061770388239	0.137589563472996	-2.56230932783488
uRYqX7wMSvSEuyUoWI	CALHM3	calcium homeostasis modulator 3	-0.140163222807907	4.37470324064005	-2.82483213111503	0.00616515846952299	0.137589563472996	-2.56295938695117
T4v1BFuefjIOH_K1_g	ANKRD29	ankyrin repeat domain 29	0.0624394596950132	6.51279105484167	2.82405041994652	0.00617864169123486	0.137589563472996	-2.56488678162576
cSzsHmoBUeVf7Ce6BU	IPO11	importin 11	0.0397206569376189	8.40491831182903	2.82390878261676	0.00618108760093501	0.137589563472996	-2.56523595912839
3WVCS7lckigDkE3ZCY	DERA	deoxyribose-phosphate aldolase	0.0310519167401706	10.2839248460622	2.82281782272376	0.00619995706226345	0.137589563472996	-2.5679250332798
3UUaROzF5E95E7FUgc	LOC100128274	putative p150	-0.0808835115453625	5.09338759760847	-2.82211493765189	0.0062121423526336	0.137589563472996	-2.5696571206908
HdSv0X1LuSC8gq3pqo	QSOX1	quiescin sulfhydryl oxidase 1	0.058890146603168	7.2483074139771	2.82194871412315	0.00621502723999105	0.137589563472996	-2.57006668810237
TknXgre75HtFLdCc5c	GLIPR2	GLI pathogenesis related 2	-0.0766668394958184	5.91413405668651	-2.82164647187146	0.00622027595344782	0.137589563472996	-2.57081135100627
i3j0YeX3eE1UX13uVU	MTMR2	myotubularin related protein 2	0.0479483176584667	6.50436562150462	2.82131036514899	0.00622611754171609	0.137589563472996	-2.57163937534596
NXSjqidHWIEogNBPks	RNF130	ring finger protein 130	-0.0858623289641967	4.54347239857275	-2.82065373820656	0.00623754438139236	0.137589563472996	-2.57325680163993
fr_S7916JfD1F066oo	PCDHGB6	protocadherin gamma subfamily B, 6	0.0776245026924565	5.83810549856873	2.820499869205	0.00624022484855965	0.137589563472996	-2.57363577427807
iKh.vylCgomgsqQdrU	BCL2L2	BCL2 like 2	-0.0557206429342095	7.67597656768601	-2.81999249208819	0.00624907109340662	0.137589563472996	-2.57488530674212
uR6JSuH11_bi4qRKDc	POC1A	POC1 centriolar protein A	0.0572309552877564	8.95434559951201	2.81912924736824	0.00626414848397746	0.137589563472996	-2.57701083830254
K3UbG1dAmbXAFaMFok	RBPJ	recombination signal binding protein for immunoglobulin kappa J region	0.0813381268345503	5.60459767540814	2.81901634813127	0.00626612284830126	0.137589563472996	-2.57728878753321
c_5.L5y.seIvhd1e5I	MTSS1	MTSS1, I-BAR domain containing	0.0551408151226214	5.94677698599107	2.81574871338183	0.00632351528783494	0.138577668669856	-2.58532965620557
l2UvlQjSq1p7X3teeQ	P4HTM	prolyl 4-hydroxylase, transmembrane	0.0610153763013256	7.33737478552573	2.81544205398036	0.00632892615777668	0.138577668669856	-2.58608389491659
0REkikV2zv_Avl94Co	FAM13A	family with sequence similarity 13 member A	-0.107943860045071	4.5084181292012	-2.8140791848634	0.00635302491639441	0.1389099605315	-2.58943513298723
l5f5XV.Ee3lptBCYRI	LRRC26	leucine rich repeat containing 26	0.0814102885859677	7.67566603137767	2.81238821571684	0.00638304251814931	0.139370555291092	-2.59359137871585
ceF_X1KXFDJINDU3tU	KIAA0391	KIAA0391	0.0333893573339772	9.26928323691929	2.81036959122982	0.00641904725504003	0.139960402894206	-2.59855039365875
3XUk9LUqolGgFO9_fA	UBE2L6	ubiquitin conjugating enzyme E2 L6	-0.0306253384151737	12.0026342845329	-2.80921494272447	0.00643972570887548	0.140214894875208	-2.60138567707571
6uiuCguiSoiiW6MOgo	PMS2P3	PMS1 homolog 2, mismatch repair system component pseudogene 3	-0.0505955890351041	7.02450180671299	-2.80632971207471	0.00649166484278567	0.140970976128984	-2.60846645555455
WVCnV9UJ0uQF3R1Qv0	ODF2	outer dense fiber of sperm tails 2	0.0462401017350596	7.64853288133637	2.80523832148921	0.00651141189940234	0.140970976128984	-2.61114339212354
fxTO5_XSwDgVR6upIo	ITGA4	integrin subunit alpha 4	-0.0520980938839303	7.248987886277	-2.8046127743891	0.00652275509341872	0.140970976128984	-2.61267734871233
WneIYOc6nkjh98ij_U	IFI44	interferon induced protein 44	-0.0470116431129969	11.0463035018682	-2.8038717351438	0.00653621602593526	0.140970976128984	-2.61449416407804
BjIF7fXV6T7qt6m4R4	GIMAP5	GTPase, IMAP family member 5	-0.060142123575671	6.0543862228481	-2.80368631546434	0.00653958815270664	0.140970976128984	-2.6149487006254
iukTtSku4o.nszC_Xk	PANK2	pantothenate kinase 2	0.0362099917500816	9.30906862702557	2.80345433527677	0.00654380930089099	0.140970976128984	-2.61551734188983
Z91eQJJ0EIgAncvMqc	RANBP6	RAN binding protein 6	-0.07627240426083	4.58168748634979	-2.80342435517268	0.00654435500622717	0.140970976128984	-2.61559082788905
NZeQ4O6gpfSSidBXz0	ZNF3	zinc finger protein 3	0.0783379456268575	5.37400771309414	2.80328500346155	0.00654689206971063	0.140970976128984	-2.61593239293788
WnurCgttU.zo7oB4p4	KRI1	KRI1 homolog	-0.0524081224461634	6.35630637299909	-2.80186151962161	0.00657286009306214	0.141334649072916	-2.61942072741677
uUlHrBT33HezlTitD4	KIF20B	kinesin family member 20B	0.0409827498075044	9.08387635769855	2.79757270827218	0.00665167216385908	0.142832044478563	-2.62992226695153
cVK4rSqJ8rfKiOkL4o	C17orf96	chromosome 17 open reading frame 96	-0.0521498550575596	7.15082489537882	-2.79615194403514	0.00667797119456301	0.143199250078453	-2.63339833422703
rU5_iCSmi4oGkngEQY	TMEM136	transmembrane protein 136	-0.0543575865694598	6.28361492284919	-2.79318881699519	0.00673312761146402	0.144183398425408	-2.64064348467873
KMrUN53QpfrXrqPX0U	TNFRSF21	TNF receptor superfamily member 21	-0.0693247078592972	7.03160164604345	-2.79162642794016	0.00676237845976674	0.144610862447319	-2.64446124186415
xQDp6QkpT9JNKQuno4	UQCRBP1	ubiquinol-cytochrome c reductase binding protein pseudogene 1	-0.0335076177255542	11.4910679108961	-2.79059223363685	0.00678180463703242	0.144642959519334	-2.64698740611049
6ExfJ57AJAt9btaup4	WHAMM	WAS protein homolog associated with actin, golgi membranes and microtubules	0.0634033283733661	5.79532900641736	2.7905573123062	0.00678246148825241	0.144642959519334	-2.64707269342742
QEZVcR5WUU.5EeXvRM	EVI5L	ecotropic viral integration site 5 like	-0.0441773342131988	7.63836516954533	-2.78989067300261	0.00679501181532368	0.144712372012256	-2.64870064473185
QN5fHVfwEXmk20Tp_4	SLC38A10	solute carrier family 38 member 10	-0.0569358030726581	7.63439358290199	-2.78929642607194	0.00680621723290897	0.144752991641977	-2.65015155257864
cv9_VS0p0JXuvsoMCU	ACSS2	acyl-CoA synthetase short-chain family member 2	-0.0519750373989152	7.5971392865476	-2.7879890331992	0.00683092982396498	0.14508037585196	-2.65334281038847
cNV8JUhN76heFVrT68	TRMT5	tRNA methyltransferase 5	0.0462892002463059	11.591776954324	2.78711108387533	0.00684757118655495	0.1450897132384	-2.65548516116513
Z6p72CEYF7mU1OUJm4	HIST2H3D	histone cluster 2 H3 family member d	0.0842697978170851	5.21850012607457	2.78698263948736	0.00685000894335971	0.1450897132384	-2.65579854329924
04FXhdyO9APWfQl3tI	RFC4	replication factor C subunit 4	0.0410984484799236	9.89334921754444	2.78570859529356	0.00687423230664578	0.145404957268834	-2.65890637229942
BF69XUBdUlHan7B7eI	PMM2	phosphomannomutase 2	0.0440615610541569	8.10832589137137	2.78413567146851	0.00690424669634153	0.145841672413358	-2.66274171937811
EVLftPlJ7vrLnu_Dxo	CXCL8	C-X-C motif chemokine ligand 8	-0.0972177923606408	7.19172524321194	-2.7830929537345	0.00692420997877638	0.146015500760533	-2.66528329043815
c5Ok0hyUdeUpZajr30	TJP2	tight junction protein 2	0.0633817650970443	5.82384439115789	2.78224025892965	0.00694057454372241	0.146015500760533	-2.66736113006501
xOQ4OhXXtHeeBIPz.c	NOMO2	NODAL modulator 2	-0.050757811107088	8.87796794922301	-2.78223823262397	0.00694061347397191	0.146015500760533	-2.66736606714939
HnkJI7R_OhIqoPeVcY	CEP19	centrosomal protein 19	0.085654858972773	5.40341431414303	2.78066906700755	0.0069708211811539	0.146272972485221	-2.67118847690781
rsSn.JFgu610hS5eUE	CLN5	ceroid-lipofuscinosis, neuronal 5	0.0471720671709808	6.48953862606785	2.78062643964637	0.00697164347276685	0.146272972485221	-2.67129229121985
9gKg16.75QDgGVqvpk	SMIM7	small integral membrane protein 7	0.0408939390015009	7.8114323423273	2.7768298235419	0.00704523902728816	0.147618144248751	-2.68053348003279
QscBISdoDUWmsCZRkI	HIST1H3B	histone cluster 1 H3 family member b	0.100246650132615	4.72628735710906	2.77602285721366	0.0070609732251296	0.147628637219897	-2.68249639443252
3giUKCIB9JKYyQ5ElA	VPS37A	VPS37A, ESCRT-I subunit	-0.0503306973071745	6.27627690372996	-2.77583168215974	0.00706470546819264	0.147628637219897	-2.68296135409876
ECCG5e.VfZfeW4_0v0	PMS2P4	PMS1 homolog 2, mismatch repair system component pseudogene 4	0.0478716198166438	8.55043339007095	2.77260360680747	0.00712799989080384	0.148751611662244	-2.69080856959273
rXCSvsyolrpKKCnv9E	CGN	cingulin	-0.0894448467961152	4.84681473596599	-2.76969076199332	0.00718555934347198	0.149562852348956	-2.69788326582948
KeU1Sl8HJAHGiblC4U	FUK	fucokinase	-0.0441460509659676	7.24390977747464	-2.76966412251409	0.00718608771563587	0.149562852348956	-2.69794794037318
TrUix_.1Y7tSUnWSSc	BHLHE40	basic helix-loop-helix family member e40	-0.0790140976747877	10.7715067723652	-2.76600881768794	0.00725892639686028	0.150511483425005	-2.70681749943037
fiCeKcvUAF3XhV5e_k	ITGA3	integrin subunit alpha 3	-0.0826761061574553	4.81183826297185	-2.76490359246214	0.00728108293542162	0.150511483425005	-2.70949748567825
u_J4hFI50aI56ETAkI	PAOX	polyamine oxidase	-0.0414592320910306	8.46607427741628	-2.76476756877428	0.00728381409320268	0.150511483425005	-2.70982726157438
f1eMxFNVD5190XXdKU	TRIM51	tripartite motif-containing 51	0.129057645515141	4.96798250920398	2.76434011415154	0.00729240287358189	0.150511483425005	-2.71086349889702
rUrwusAw1KbS0Ck.54	PLAGL1	PLAG1 like zinc finger 1	-0.0828482994112473	5.10086054649928	-2.76431457675037	0.00729291628642458	0.150511483425005	-2.7109254027454
oqluBEgV0IQo4SJ6KE	L3MBTL2	L3MBTL2 polycomb repressive complex 1 subunit	0.0513536796846922	7.65920829756231	2.76406349261132	0.00729796593431327	0.150511483425005	-2.71153401818895
ZnOgng5aGckS.H.1f0	VBP1	VHL binding protein 1	0.0381015528197659	10.2682590026234	2.76271557576338	0.00732512922266401	0.150511483425005	-2.71480055073813
c0SdQOidx86k96pcA4	SLC9B1	solute carrier family 9 member B1	0.108662235892238	4.72592785278272	2.76237736458491	0.00733195939798202	0.150511483425005	-2.71561997074964
lkoEEjkoEp5EnSRBPU	GBP5	guanylate binding protein 5	-0.0631246317870827	6.48349544940839	-2.76195304447182	0.0073405367984148	0.150511483425005	-2.71664790325148
3Ko07dSsFYeyVeenic	BSPRY	B-box and SPRY domain containing	-0.0709241808360252	5.21616246845602	-2.76184979301283	0.00734262536120645	0.150511483425005	-2.71689801507306
6CKX957tV0aX5XYPeQ	ABTB2	ankyrin repeat and BTB domain containing 2	-0.0787104597257497	4.95864406516924	-2.76165591548944	0.00734654857272953	0.150511483425005	-2.71736763543762
l5Z73_.Va7e_Sfm.qk	TMEM185A	transmembrane protein 185A	0.0401008980910463	6.24378757822912	2.76113121829453	0.00735717572734519	0.150511483425005	-2.71863845326559
xjqRejB0o6qedECFE0	SKA1	spindle and kinetochore associated complex subunit 1	0.0599235590388396	7.00944393591011	2.76112257503256	0.00735735090483225	0.150511483425005	-2.71865938565959
9jhKTJepM0XT6wKnIk	MCM4	minichromosome maintenance complex component 4	0.0651744357937608	7.74568143738708	2.75727677279732	0.00743567609810108	0.15174595820582	-2.72796804466637
E.VQt3Osm0m2imsuGs	SHFM1	split hand/foot malformation (ectrodactyly) type 1	0.0391132888358998	8.48524886884456	2.75715874983851	0.00743809184056797	0.15174595820582	-2.72825355285037
W.pn.uZlat7650i7rQ	STMN1	stathmin 1	0.0576595603766549	7.06524165937768	2.75654104762357	0.00745074695784504	0.15174595820582	-2.72974767167546
rhd3h6hNTd5c16hdRE	GSTM4	glutathione S-transferase mu 4	0.0754607192986306	5.18012843550025	2.7562515842537	0.00745668409734407	0.15174595820582	-2.73044774375624
KfCCV6UD.jXBfgs5fg	LAMP2	lysosomal associated membrane protein 2	0.0439025817678809	7.92406896982345	2.75557519594616	0.00747057429674886	0.151830157508859	-2.73208337240392
QWKZjz5w_AH.VDFWW4	RNU4-1	RNA, U4 small nuclear 1	0.147466948637249	7.00911848190239	2.75411083474694	0.00750072742421524	0.152189026386611	-2.73562336715763
0SLleCRRxQX5dVdd0A	NLRX1	NLR family member X1	0.0817831020298457	5.201627700877	2.75376894501559	0.00750778341886674	0.152189026386611	-2.73644964701656
cMSTrZV_V6LeoECIok	HLCS	holocarboxylase synthetase	0.0768221739972164	5.05701415172226	2.75292390178965	0.00752524969925828	0.152344716928547	-2.7384915991291
rVofv3RS4JRI86SEnU	RCN2	reticulocalbin 2	-0.0449667358992974	8.12634457605602	-2.75138559798701	0.00755714062627373	0.152791643207571	-2.74220745715383
NV_VdHjfn.V63Tkvus	NNAT	neuronatin	-0.103441983485547	4.62346064479647	-2.74947532611205	0.0075969151904524	0.153384492182349	-2.74681952308854
l.ruhw6QnrvwitKKXk	MB21D2	Mab-21 domain containing 2	-0.0396021797635045	8.52860132232552	-2.74863674396414	0.00761443613369267	0.153384492182349	-2.74884334871888
QeHnXQCcGvkXULp6t4	GFI1	growth factor independent 1 transcriptional repressor	-0.0600464651017552	6.6072863874734	-2.74856098432602	0.00761602084127413	0.153384492182349	-2.74902616204428
9go67XHujio4EKo6f4	TSC22D3	TSC22 domain family member 3	0.0671285723625106	9.34486644764423	2.74705989048899	0.0076474824182706	0.15381912957059	-2.7526475792512
iVTUrnNI4UvHny8HK4	FRMD4A	FERM domain containing 4A	0.0565294785294667	7.03736855025904	2.74631170136078	0.00766320818883461	0.153868102141507	-2.75445201112191
Tnv1l35faGWj.hud2Y	RPS7	ribosomal protein S7	0.0385639231974576	9.48349765537471	2.74552240258412	0.00767983010874572	0.153868102141507	-2.75635516397125
BIgWIuBeF.aEtzUhXY	ALKBH3	alkB homolog 3, alpha-ketoglutaratedependent dioxygenase	0.0381502116515942	7.76499062022095	2.74493364340913	0.00769225033310622	0.153868102141507	-2.75777449298934
HUQv0S0mkaiQgo_Keo	TMEM120A	transmembrane protein 120A	-0.069482133627511	7.29404326662998	-2.74492283309683	0.0076924785548946	0.153868102141507	-2.75780055127492
03tSCXVYVVCc.nRPBA	SPRED2	sprouty related EVH1 domain containing 2	-0.0673444914733631	5.45458655182158	-2.74453186840693	0.00770073656901881	0.153868102141507	-2.75874291769973
lekrQ59WhGjR.7ePUk	MCM7	minichromosome maintenance complex component 7	0.0405930759299251	11.5916201787903	2.74413068364268	0.00770921888941261	0.153868102141507	-2.75970980699172
cezSj9P5O8tRIvlSBU	ZMYM4	zinc finger MYM-type containing 4	-0.0390533514687955	7.2293396900387	-2.74239680388149	0.00774597707219026	0.154403804173954	-2.76388730846883
od9VeHVU_7wgVJBUok	CD1C	CD1c molecule	-0.128860002625746	4.93651740250708	-2.74131830079219	0.00776892215681685	0.154663145955658	-2.76648472444573
9nRl7DVJH_oJYqo6tM	CATSPER2	cation channel sperm associated 2	-0.108628287129344	9.37407062554469	-2.74003358281443	0.00779633563455081	0.154929411085963	-2.76957771533721
c5_Sze.d9cp0L64VCU	WSB1	WD repeat and SOCS box containing 1	-0.121003434295554	6.5177033595525	-2.73975926328609	0.00780220055828591	0.154929411085963	-2.77023799669879
WUCkSlC_yf7V_U05UE	LRRC75A-AS1	LRRC75A antisense RNA 1	0.0323303959313461	12.5355561985438	2.73859477724115	0.00782714213168309	0.155226686249735	-2.77304030319073
lgUgXRN_e9aZUcVCAU	CKS1B	CDC28 protein kinase regulatory subunit 1B	0.0408348077512838	10.916042337642	2.73765068123046	0.0078474168122085	0.155265822335901	-2.77531154896464
QJ4C6qwK6LDe6P7974	FGFR1OP2	FGFR1 oncogene partner 2	-0.0620458023133396	7.4500684358094	-2.73757415573719	0.00784906231875349	0.155265822335901	-2.77549562172438
310RfkX1cf94PnOHHU	RNLS	renalase, FAD dependent amine oxidase	0.0413153578758675	6.95898368786704	2.73459919389016	0.00791327735624796	0.156337438936635	-2.78264834745054
Z5J7creaUTfqhEeh70	EIF4H	eukaryotic translation initiation factor 4H	0.0492420571614251	10.5805659734789	2.73385186731071	0.00792948388603058	0.15645906861562	-2.78444417538961
Hnle6t_dDHvTF6IiCs	TTC31	tetratricopeptide repeat domain 31	-0.041967670872434	7.43251036495449	-2.73317332581102	0.00794422503891542	0.156551513171943	-2.78607437313529
QStf58UCilQ.R0Dv_I	TRA2B	transformer 2 beta homolog (Drosophila)	0.0456476902739436	10.4545239153463	2.73090795654599	0.00799362140555143	0.157325787663242	-2.7915145882782
xUpXSvg1InsivEsk0U	PPP1R8	protein phosphatase 1 regulatory subunit 8	0.0548186748703654	7.07234104431262	2.72913836603359	0.00803240259407348	0.157616193294485	-2.79576169906776
WYi619X_XuuwC5NESs	FNTA	farnesyltransferase, CAAX box, alpha	0.0306339191602289	9.63457436353181	2.72893984177411	0.00803676404085364	0.157616193294485	-2.79623803056539
9USh4o6g.pKl4gjreE	LYPD6B	LY6/PLAUR domain containing 6B	0.103176788130422	5.4499581543245	2.72884948494441	0.00803874983786107	0.157616193294485	-2.79645482010996
oe0qNKkkcEpkAsie0I	NDUFA6	NADH:ubiquinone oxidoreductase subunit A6	0.05024849793175	8.33358599284986	2.72745679571769	0.00806941417226019	0.15787141434021	-2.7997955183323
cZUqab.lwTUpb3vFAg	HIST2H2AC	histone cluster 2 H2A family member c	0.054541367472794	9.59429984526715	2.72733739294999	0.00807204816384936	0.15787141434021	-2.80008187099406
oueo8Su4lFedBSv888	UTP20	UTP20, small subunit processome component	-0.0735230055636178	5.04304316887637	-2.72538887280083	0.00811514323139298	0.158515118979079	-2.80475341129387
3.d4LruoLFKoekglSk	DHTKD1	dehydrogenase E1 and transketolase domain containing 1	-0.0445272268899073	7.01114598660977	-2.72487729110906	0.00812649260777442	0.158537890874476	-2.80597947634203
KCV7vXqgnqh_oLjq7s	DUSP2	dual specificity phosphatase 2	-0.0880760994867928	9.2460147690277	-2.72382213831395	0.0081499468928284	0.158796462112081	-2.80850769150276
Kv1dT13TuSEq_IFLIc	C9orf40	chromosome 9 open reading frame 40	0.042208616226033	7.20772750409354	2.72239991527566	0.00818165847466036	0.159036697214927	-2.81191419179609
ihHkgFeJICKX3o6UBU	CDC25C	cell division cycle 25C	0.0607841392707836	6.43463081592548	2.72196653325941	0.00819134407861223	0.159036697214927	-2.8129519429603
BV.1_HPEeXooySIJe0	XBP1	X-box binding protein 1	-0.0445515088524437	11.3656500543024	-2.7214869239401	0.00820207502961376	0.159036697214927	-2.81410023324414
ER7He6kKOrUghVH0pE	TNFSF12	tumor necrosis factor superfamily member 12	-0.0549389272775349	6.19914460989208	-2.7210600472247	0.00821163693059056	0.159036697214927	-2.81512213389913
0kqjYT4hQjkbWfXwTo	TESC	tescalcin	0.0595320906839125	7.28048593586983	2.72098341217803	0.00821335460950676	0.159036697214927	-2.81530557704519
3urw.iidIgjrol0sUo	PIR	pirin	0.0577257835101367	7.28048664934426	2.71853501991387	0.00826840544226116	0.159890288167911	-2.8211641760563
QEpXPUlV_fR3FoSGkk	SLC15A3	solute carrier family 15 member 3	-0.0453000039228652	9.83021562777665	-2.71811077014062	0.00827797869111873	0.159890288167911	-2.82217890672233
lToEVSQkXVJeX9okkU	DAP	death associated protein	-0.0374593704178802	8.06414995916326	-2.7156183198625	0.00833442602288932	0.160428157547942	-2.82813784772164
fkr9ClCeuFeeLbiaKA	DOK3	docking protein 3	-0.0585876728803487	5.55941686883823	-2.71558012435997	0.00833529377887835	0.160428157547942	-2.82822913133424
9pS5h.p1B5I.1RO0iY	ZMAT5	zinc finger matrin-type 5	0.0521084823032439	6.94056089260425	2.71551644349382	0.00833674071533176	0.160428157547942	-2.82838132025197
fHtV.IjVF7SJRJ9qtc	IQSEC1	IQ motif and Sec7 domain 1	-0.0495115133532171	7.37612939544417	-2.71355070271371	0.00838151871228851	0.160790478458062	-2.83307777684982
fU61rr_y9fQLSkeonI	DENND4B	DENN domain containing 4B	-0.0591158311979854	8.13195892747401	-2.71323926792485	0.0083886330798282	0.160790478458062	-2.8338215923843
6q0bt.ri4ghcB16U00	AFAP1L2	actin filament associated protein 1 like 2	-0.118349327683039	4.57463468180893	-2.71323629003074	0.00838870113299939	0.160790478458062	-2.83382870431006
uEReUHkXN_F56kXq30	CTSC	cathepsin C	0.0645869637461598	9.23047746695497	2.71250866543654	0.0084053445089443	0.160790478458062	-2.83556625899782
lDihIgXSu985y5_eLk	SWAP70	SWAP switching B-cell complex 70kDa subunit	-0.0376484960394379	10.3550220377169	-2.71242717915933	0.00840721026881182	0.160790478458062	-2.83576082353986
Qv9W.zupDDtA7nOSUo	CHD1	chromodomain helicase DNA binding protein 1	-0.0403945794705269	8.68607527154437	-2.71117108187707	0.00843601855725741	0.161143480858139	-2.83875941071941
TCl_h31eKvl4D19Of0	SH2B3	SH2B adaptor protein 3	-0.0536930664572752	9.28858389281326	-2.71039018631867	0.00845397364115252	0.161288555938067	-2.84062302321909
ELoiQH2KGxXoorrTpI	SAC3D1	SAC3 domain containing 1	0.0528501004196619	7.87034291201664	2.70918317311054	0.00848179511637122	0.161614692980271	-2.84350272173227
6eST5S_gH_04nxdGuE	NMT2	N-myristoyltransferase 2	0.0831191313442081	4.80837214753443	2.70865175327492	0.0084940707622037	0.161614692980271	-2.84477025995954
QqQFQI6Aufvq6sJFF4	TMCC3	transmembrane and coiled-coil domain family 3	-0.0579887547126757	5.59235087140135	-2.70809350349039	0.00850698364889606	0.161614692980271	-2.84610157804119
B1dfervfSniSIp17Fc	POLR2L	RNA polymerase II subunit L	0.0770967085679484	5.64936277607134	2.70785124002811	0.008512593026967	0.161614692980271	-2.84667926121784
oh1UuQKqlI97u.dwXc	DACT3	dishevelled binding antagonist of beta catenin 3	-0.0805698942067795	5.14767948225568	-2.70665207545236	0.00854040831333316	0.161873662484545	-2.84953808831647
0VT9Ov9LpB8eFfv.l4	SNTB1	syntrophin beta 1	0.094748556404418	6.57513278582108	2.70602353878411	0.00855502070403855	0.161873662484545	-2.85103612389355
u7unt6ujQIAyoeX6eU	RAB24	RAB24, member RAS oncogene family	-0.0817529359252127	5.06169955339117	-2.70592012662407	0.00855742704424333	0.161873662484545	-2.85128256662278
KBSq.yd73edU19nRSc	CREB3L2	cAMP responsive element binding protein 3 like 2	-0.0418749929655612	9.65706008099595	-2.70356376768967	0.00861242592371308	0.162594877122061	-2.85689598558862
rlfSx68koIDtcQCGLc	PIGH	phosphatidylinositol glycan anchor biosynthesis class H	-0.0511219100403102	6.72770385530657	-2.70295909194459	0.00862659137873181	0.162594877122061	-2.85833583731864
0iEd5d66eSJDFQl0.o	FYCO1	FYVE and coiled-coil domain containing 1	-0.0613436769528902	6.01888426076227	-2.70258327643122	0.00863540614950494	0.162594877122061	-2.85923059763923
Ed2iSvih7ueHugoLpc	TGM5	transglutaminase 5	0.0790302148445685	5.46183632982007	2.70250127292111	0.00863733063848567	0.162594877122061	-2.85942582241593
lxkIKI9EiIYlSinh4k	AUP1	ancient ubiquitous protein 1	-0.0500275785365136	8.1089458628648	-2.70140901266777	0.00866300158408926	0.162881169880558	-2.86202569991907
WAp7uKoiCoirqXnuhA	SEMA4C	semaphorin 4C	-0.0671488160479501	5.69242146787557	-2.70093605139548	0.00867413899673679	0.162893843065378	-2.86315121508333
lJcLaoJYK8QKQIKSdY	HIST1H1D	histone cluster 1 H1 family member d	0.0824141136170152	6.20073481770284	2.69931270828833	0.00871246540555579	0.163092695414057	-2.86701311282327
9US36eI0Co4kEqH3lE	PPFIBP2	PPFIA binding protein 2	-0.0439271652015999	9.12850352363346	-2.69915798257972	0.00871612646876212	0.163092695414057	-2.86738110458535
rSTjV0ngdAJbQIX5dU	CCNB2	cyclin B2	0.0434722870508593	10.1040455274302	2.69895029117805	0.00872104299471299	0.163092695414057	-2.86787504063076
K9eVxdccEfXlU.oVsU	TRIOBP	TRIO and F-actin binding protein	0.0453956016107314	7.14053535949155	2.69810212560821	0.0087411472863469	0.163092695414057	-2.86989184891497
WeHyh_q_rUK58TVKpc	ECE2	endothelin converting enzyme 2	0.0737781663199151	6.28318382456147	2.69787743499537	0.00874648027069025	0.163092695414057	-2.87042604360248
ZqUTlT9VH5ODthHslE	ZNF417	zinc finger protein 417	-0.0798773276405983	4.59930011670573	-2.69781931084232	0.00874786031865623	0.163092695414057	-2.87056422608508
ToJ6ycuXdzQNKv5F_I	NPL	N-acetylneuraminate pyruvate lyase	0.0638070612804767	6.24230938049528	2.69735315640589	0.00875893546457962	0.163092695414057	-2.87167236008198
BdREVTRUjD8S97wS4o	ZFR	zinc finger RNA binding protein	0.0372193037368189	9.17776380134395	2.69685736421766	0.00877072880414931	0.163092695414057	-2.87285077961423
0V6CMrJByHtv.romvQ	TFB2M	transcription factor B2, mitochondrial	0.0379573177685408	9.34945655552397	2.69650944841543	0.00877901328089544	0.163092695414057	-2.87367761648693
WooPoHIO7h3uqHkyv4	ARL8B	ADP ribosylation factor like GTPase 8B	-0.0339067173428928	9.16263128091193	-2.69551583416948	0.00880271229564778	0.163181360876321	-2.87603851159707
ZfczqFYPIR54NexJfE	DEGS1	delta 4-desaturase, sphingolipid 1	0.03282348193011	10.1488370232856	2.69543052768183	0.00880474968757127	0.163181360876321	-2.87624117303357
0UJEk_SS9YICJj1VF0	EXO1	exonuclease 1	0.0555154824250207	5.68603551506242	2.69489566192352	0.0088175338053904	0.163223978932601	-2.87751172871855
T03kDulKfqgQ465ECk	IFIH1	interferon induced with helicase C domain 1	-0.045217106037501	10.3894476977346	-2.69314334862586	0.00885953555494354	0.163727178555109	-2.88167287076915
3aVeAhBJ1f3n2hFHQE	RMI2	RecQ mediated genome instability 2	0.049164752446215	8.65056130334548	2.692884684548	0.00886575099704244	0.163727178555109	-2.88228692482095
NjXGdGm9V.HQN6l.6Q	KIF20A	kinesin family member 20A	0.0576956235099116	7.83841511979517	2.69162133370605	0.00889616528445278	0.164094195673413	-2.88528536772291
BeR3lKfVDn9HfNxX_k	NDUFAF3	NADH:ubiquinone oxidoreductase complex assembly factor 3	-0.0305073470963339	11.4912617926702	-2.69025023596053	0.00892928120891091	0.164434866925067	-2.88853825745866
oCfVU5f5XV.Ee3lptA	LRRC26	leucine rich repeat containing 26	0.0764701222430197	7.28806214457613	2.68998257532714	0.00893575908392898	0.164434866925067	-2.88917311907459
KS2sF3PggYEKUDd1AE	UBA3	ubiquitin like modifier activating enzyme 3	-0.0611936199132761	6.33809328567377	-2.68845348640412	0.00897284810458718	0.164833638919802	-2.8927989758211
3q3JE7RX7Ub79E3ryo	CLIC6	chloride intracellular channel 6	0.0646195606627701	9.11535458230398	2.68821665257943	0.00897860520323688	0.164833638919802	-2.89336042042382
uOq6EEW0haiFKknfRI	HJURP	Holliday junction recognition protein	0.0558637827496297	7.71438813641578	2.68544876969954	0.00904613882599986	0.1656241625518	-2.89991908713169
EdUoLS4_3.6n1XUChc	RTN3	reticulon 3	-0.045703138230669	7.5891772603673	-2.68534517582305	0.00904867538629485	0.1656241625518	-2.90016445355967
ouPXkH4X0p6iK6IlOU	C6orf48	chromosome 6 open reading frame 48	0.0371104857876857	11.0860306322532	2.68505217835797	0.00905585312345441	0.1656241625518	-2.90085838906189
ulQHtA7Re87PbVz18E	FAR2	fatty acyl-CoA reductase 2	0.0552049590546391	6.85881957107008	2.68471088212183	0.00906422061241865	0.1656241625518	-2.90166663857998
rUpIhxf7hSdUsAFUpE	ABHD10	abhydrolase domain containing 10	-0.0470021404594484	6.90865519913929	-2.68375488000279	0.00908769627100776	0.165858447300174	-2.90393017945783
EK.h0Lunsep0Ip9F3o	TRIM69	tripartite motif containing 69	-0.0599248189079283	7.61699399766419	-2.68247549828708	0.00911919962034529	0.165917770313284	-2.90695837565917
ZW0V.L_fgfywFF58qE	PPIC	peptidylprolyl isomerase C	-0.0873227412210789	4.80990829768916	-2.68225989322409	0.00912451845013227	0.165917770313284	-2.90746858146205
6pdThKUII6XON3gFJU	LRTOMT	leucine rich transmembrane and O-methyltransferase domain containing	0.0753527779832402	5.08480984547496	2.68172015669776	0.00913784578946786	0.165917770313284	-2.90874566411207
KVTueeLpQjjlKeVzEc	SELENOO	selenoprotein O	0.0649316536603795	6.35533248272315	2.68165480531687	0.00913946066992214	0.165917770313284	-2.90890027942695
ECX53vu175ad6X17h4	RXRA	retinoid X receptor alpha	0.0525358503453365	7.63690413781188	2.68146166733878	0.00914423477189092	0.165917770313284	-2.90935720826053
3XfUx6yOYD83uTgKtE	NRCAM	neuronal cell adhesion molecule	0.0795501452717615	5.8332205315229	2.68050697573843	0.0091678668378062	0.166152911444665	-2.91161544316899
rXotrr84O65TeqB4QU	CLLU1OS	chronic lymphocytic leukemia up-regulated 1 opposite strand	-0.0847335264258637	5.68605050206631	-2.67986571294764	0.00918377165934994	0.166247624642744	-2.91313192747989
lXgFH1UnytXe8176XU	TBX19	T-box 19	-0.0682996728865275	4.89881934756315	-2.67925448300199	0.00919895500993807	0.166329072700018	-2.91457711681709
3enAQXhAe6UqgWEQV0	TBC1D8	TBC1 domain family member 8	-0.089049444618508	4.51044640115708	-2.67847018318224	0.00921847105304907	0.1664731977231	-2.91643112273377
KUV_oun66J6oQr.vxw	SPTLC2	serine palmitoyltransferase long chain base subunit 2	-0.059701970199573	5.21530059497835	-2.67807525296824	0.00922831254079106	0.1664731977231	-2.91736453248669
iV0M0XV9I5HV4h14lI	CA11	carbonic anhydrase 11	-0.0781056671522321	4.70396540191642	-2.67671457352259	0.00926229347173949	0.166892806444491	-2.92057962204076
EJF7X6oWN5buFKoIC8	HIVEP3	human immunodeficiency virus type I enhancer binding protein 3	-0.0618292719294554	5.95006744456034	-2.67601212881401	0.00927988058214378	0.1670163941073	-2.92223888229977
oVE0nUK0q48J7Suqws	RBM33	RNA binding motif protein 33	-0.0691115692771619	4.80644817363444	-2.67494324912968	0.00930670053270706	0.167074129942875	-2.92476303323394
WxOHSTF565Ingj.oq0	CD38	CD38 molecule	-0.121971604445643	8.24197273442107	-2.67457518603746	0.00931595218194181	0.167074129942875	-2.92563202314477
W3W6R_5.Xp4id1XvjE	UBASH3B	ubiquitin associated and SH3 domain containing B	-0.0846050339563917	5.44609922242703	-2.67436682808379	0.00932119319121345	0.167074129942875	-2.92612390954525
xud4v2r3nXECBua55o	D2HGDH	D-2-hydroxyglutarate dehydrogenase	-0.0396933388667122	8.68023516012856	-2.67370190344024	0.00933793659805788	0.167074129942875	-2.92769344086139
6nGQ7l7rVHDe4ede6A	SP100	SP100 nuclear antigen	-0.0458390547455453	7.19873206473065	-2.67341807602871	0.00934509197418337	0.167074129942875	-2.92836330967871
3enFUiovtGcS4unpf8	IMPA2	inositol monophosphatase 2	0.0640275293621494	6.49521323773653	2.67296064069834	0.00935663457652476	0.167074129942875	-2.92944279458693
03dSL5OyMk.P3uV8BU	CLIC4	chloride intracellular channel 4	-0.0437375816618431	9.74719043768563	-2.6728981749821	0.0093582118005002	0.167074129942875	-2.92959019358587
fSVd01eiR3lnQiev7w	DGUOK	deoxyguanosine kinase	0.037726296342537	10.5449892544678	2.67209079819273	0.009378619423887	0.167100009850439	-2.93149509310466
EXRtTR6d3D1H7097hU	ATP6V1G2	ATPase H+ transporting V1 subunit G2	-0.0801849765731747	4.77438171090146	-2.67179539887759	0.0093860961995951	0.167100009850439	-2.93219193301676
KxFSCJQzAb105cScm4	CNOT4	CCR4-NOT transcription complex subunit 4	-0.0619815290446061	5.29013023872567	-2.67156774220854	0.00939186206443565	0.167100009850439	-2.93272892724793
Tiuh76h0KH_ee.1ztM	HSPA1B	heat shock protein family A (Hsp70) member 1B	-0.0802280988294123	7.78130905221551	-2.66953575644226	0.00944346936090607	0.167826405263226	-2.93752031928806
NUqSTuPT_qOgoN7Vk0	LSM2	LSM2 homolog, U6 small nuclear RNA and mRNA degradation associated	-0.0501035721271318	11.2935363989407	-2.66679851796523	0.00951339676171073	0.168876352093857	-2.94397003549767
EBVdXQoOl_VKDlRREw	JPH4	junctophilin 4	-0.0811780498281292	4.49623636010647	-2.66608692968631	0.00953165258296949	0.168933151811536	-2.94564586610875
lvYRUsVca4gko4vQm0	ERP29	endoplasmic reticulum protein 29	-0.0440338191358493	8.71710693614026	-2.66511353209374	0.00955667681637343	0.168933151811536	-2.94793768762399
u9V81Uee6K.exdn6OU	DUSP22	dual specificity phosphatase 22	0.0431482406692854	9.23857464136415	2.66504708550539	0.00955838721406246	0.168933151811536	-2.94809410853306
Nkl_jf3TFQBPoSOebE	SMC2	structural maintenance of chromosomes 2	0.0586256256059926	7.80184822582428	2.66479383851899	0.00956490858657048	0.168933151811536	-2.94869024456008
3LJ1F4IqOgXerSgEno	SMCO4	single-pass membrane protein with coiled-coil domains 4	0.0421954136352843	8.95869300385393	2.66456313280848	0.00957085302529387	0.168933151811536	-2.94923327925843
x5VeHjJP0g7t.4KnMU	GPR160	G protein-coupled receptor 160	-0.0486514963750944	8.29301728069448	-2.66342741956294	0.00960016526958049	0.169258632974891	-2.95190596554534
feXQteRt1eoQC_ullw	MOSPD3	motile sperm domain containing 3	0.0733215513657159	4.87125341824194	2.66262587982998	0.00962090183811906	0.169419703944486	-2.95379168369372
xeSt1TgpRVOt46k4JM	TCN2	transcobalamin 2	-0.0737190506326327	5.7252898211546	-2.66155597789469	0.00964864474993001	0.169419703944486	-2.95630804152169
KXOev5.o0RXrgVaucI	BBS2	Bardet-Biedl syndrome 2	-0.0612513974876312	6.34094896792033	-2.66135834087443	0.00965377750830569	0.169419703944486	-2.95677278486418
uqR7Qfq.CEooT5C9EU	MRPL50	mitochondrial ribosomal protein L50	0.0349766456154179	9.81451449890873	2.6610630828912	0.00966145017707923	0.169419703944486	-2.95746703189797
WiSNevh5IhF_CzqvZE	GAD1	glutamate decarboxylase 1	0.113698486321469	4.35076942648839	2.66052776247799	0.00967537534811745	0.169419703944486	-2.95872558463901
TX10boO6hjR3j6pBR4	WRNIP1	Werner helicase interacting protein 1	0.0536836818995339	5.53584167498729	2.6605020820362	0.00967604382693283	0.169419703944486	-2.95878595490746
NESQvLL4l4U4t94d70	MAP4K5	mitogen-activated protein kinase kinase kinase kinase 5	0.04169082369036	7.57973805517715	2.66013979177843	0.00968547896393836	0.169419703944486	-2.95963758633767
ZKikkh0pXU613_0.74	EMD	emerin	0.0340071682257007	10.4130648661121	2.65856477045952	0.00972659475047008	0.16994795406882	-2.96333888075666
EZb_oGQf4ohLmuh9Lg	AAMDC	adipogenesis associated Mth938 domain containing	0.0501850922708906	7.0151419736672	2.65767543812252	0.00974988082858806	0.170032513192234	-2.96542802575716
Ek0NBQEFeieJECLTuE	SNAPC5	small nuclear RNA activating complex polypeptide 5	0.0620896238644391	5.62497967780308	2.65754585060084	0.00975327815266348	0.170032513192234	-2.9657323947337
lh7AVE8KAUcat6S5u0	PAPD7	poly(A) RNA polymerase D7, non-canonical	-0.0494599473528845	7.9489899812174	-2.65422873586786	0.00984060881810372	0.171363085100938	-2.97351938948384
olT3W_ASNEkGEBnTpk	PARN	poly(A)-specific ribonuclease	0.0439478567174892	8.78714848560217	2.65315468221944	0.0098690379245124	0.171666125596435	-2.97603906636723
N1At3ntCMj2IgJG6U4	LYST	lysosomal trafficking regulator	-0.069687988241983	5.50214618481152	-2.6506435502901	0.00993579694628447	0.172591230858907	-2.98192683784764
BlyUvclXtd8jM1V.eo	PRKAG1	protein kinase AMP-activated non-catalytic subunit gamma 1	0.0420822741448184	7.52417439337503	2.65032127003905	0.00994439453240234	0.172591230858907	-2.98268215142406
WkSBLsV8uFL5xUJPuU	NCKAP1	NCK associated protein 1	-0.0965810680780565	4.8377986941654	-2.64938247881995	0.00996947760077635	0.172833883395196	-2.98488193002763
rh0PXeJLjr3kuunheY	HENMT1	HEN1 methyltransferase homolog 1	0.0568940999353379	6.95718698200585	2.64844256345741	0.00999464836502857	0.172892108160836	-2.98708371063648
QkJfuqNeelIJCagKQw	HRASLS2	HRAS like suppressor 2	-0.0923254041952147	5.4152280341435	-2.64803653284915	0.0100055396656674	0.172892108160836	-2.98803465415151
rX7txVTVZ7gblHgwLY	ERI3	ERI1 exoribonuclease family member 3	0.0437028282870797	7.53723170244978	2.64801368062299	0.0100061529710247	0.172892108160836	-2.98808817167195
3Z6l7r4jC0UnGgr94Y	NCAPG2	non-SMC condensin II complex subunit G2	0.0491803911491479	7.51746978426573	2.64637708897818	0.0100501646678578	0.173460048280721	-2.99191992532363
HrVfcM_l0wKr1Hsf1k	TNPO1	transportin 1	0.0417139037710289	8.02176950325255	2.64443436950216	0.0101026374117972	0.174172601580132	-2.99646592546863
ThEuLTRP11R5e6X71E	OGFOD1	2-oxoglutarate and iron dependent oxygenase domain containing 1	0.0408554587176033	8.55914783201731	2.64370161122605	0.0101224938112692	0.174278741698726	-2.9981798911144
ceCMl7uy.BepKETdXk	PLA1A	phospholipase A1 member A	-0.0701418880599207	8.0145969021033	-2.64338135617872	0.0101311832757802	0.174278741698726	-2.99892886604553
03U10RfeX_151f8JSs	TNFRSF9	TNF receptor superfamily member 9	-0.075306827003158	5.80369229068948	-2.64292884039611	0.0101434729309912	0.174297556942241	-2.99998703151548
BSseigiIIpOEnBKhqc	MAN2B2	mannosidase alpha class 2B member 2	0.0395074221013616	9.00137463791939	2.64183890719012	0.0101731295758584	0.174580939853171	-3.00253513477544
ToJIPCSKI647Z_kERU	NGLY1	N-glycanase 1	-0.046529129523635	9.10311841477598	-2.64050494012516	0.0102095335945422	0.174580939853171	-3.0056525937606
HofSUEo9eJ4DkjhRPQ	HLA-DRB1	major histocompatibility complex, class II, DR beta 1	-0.0639168586077517	6.80094732373586	-2.6404886857807	0.0102099779059413	0.174580939853171	-3.0056905720234
T6VFBWVF_HlVILu34g	SLC43A2	solute carrier family 43 member 2	0.0659390021216966	6.43996483887019	2.64015290575298	0.0102191603646552	0.174580939853171	-3.00647507938713
N6dcdStVZqtUkkPacc	MPLKIP	M-phase specific PLK1 interacting protein	0.0476565936739037	7.37338454272913	2.63999589262629	0.0102234567239663	0.174580939853171	-3.00684189284805
up_5J6S715VJOkXz78	FAM136A	family with sequence similarity 136 member A	0.0441102845604547	9.00211156555958	2.63985734032525	0.0102272493028066	0.174580939853171	-3.00716556350832
H6E7d6GE08B4FolJik	ALYREF	Aly/REF export factor	0.0627045067690625	7.78729442449195	2.63870809476252	0.0102587568436159	0.174803374192403	-3.00984977370522
6di441O.0mGmwQHqko	MCL1	BCL2 family apoptosis regulator	-0.0661863088912205	7.34646981340374	-2.63856315905569	0.0102627366400216	0.174803374192403	-3.01018822230513
fzqLiUkhJUkjXERP9E	LILRB2	leukocyte immunoglobulin like receptor B2	-0.0813319980633397	5.56035736748153	-2.63619873077266	0.0103278601523221	0.175535007640911	-3.01570741980349
KXXaHaHavzNmXR9NUs	EIF5	eukaryotic translation initiation factor 5	0.0593246599367478	8.30261410227046	2.63618491747608	0.0103282417137124	0.175535007640911	-3.01573965187736
ZR4iVBSRFxIv1JiEOU	SWI5	SWI5 homologous recombination repair protein	0.0400553978144967	7.70932398526875	2.63452647351582	0.0103741457609757	0.176122902079465	-3.01960848441208
3aKUBUIK3pAtKdKiHc	IGFBP3	insulin like growth factor binding protein 3	0.0998979250167601	4.34998033199754	2.63351611547062	0.0104022022798123	0.176406846505574	-3.02196448795757
KN4nsgqTeHTzWUhfS0	ATP11C	ATPase phospholipid transporting 11C	-0.0615247503403898	5.63850683952687	-2.62988582060515	0.0105035815669712	0.17793227185485	-3.0304237374669
63j59e_JEC4ieUeJJU	PDIA4	protein disulfide isomerase family A member 4	-0.0607842168061434	6.34478845833303	-2.62884643315319	0.0105327722948529	0.178232825093772	-3.0328439549559
Tva9KKWVl6VtZYXuKY	CXCL16	C-X-C motif chemokine ligand 16	0.0745662806709106	4.68455900970995	2.62835617223147	0.0105465666212075	0.178272474656849	-3.03398525959017
31TUc8ORyuooippDhE	ETHE1	ETHE1, persulfide dioxygenase	0.0674173084337693	5.1963194078965	2.6269928624632	0.01058501200031	0.178648107545017	-3.03715807229473
o1UcwS_eWWgsSFIJV4	SCNM1	sodium channel modifier 1	0.0380459971503002	7.44051796583122	2.62675475535364	0.0105917396752345	0.178648107545017	-3.03771207861238
Z46PfU15aOLuruMSXE	MELK	maternal embryonic leucine zipper kinase	0.0452538693611285	9.94041613034879	2.62503386592992	0.0106404787255743	0.179038546716987	-3.04171487687895
EClUiJwdFfUUzihukI	FCRLA	Fc receptor like A	-0.0408419939065999	11.4789278229211	-2.6249105401616	0.0106439793711245	0.179038546716987	-3.04200165142829
Ke6lOk4u.3LLI_ioCc	HN1	hematological and neurological expressed 1	0.0532761229544476	8.01477827404624	2.62472002016729	0.0106493894051856	0.179038546716987	-3.04244465398595
xtSndQGgdxISWVbC7Q	WDR20	WD repeat domain 20	0.0674423622083438	5.1544681794765	2.62395851624215	0.0106710381383564	0.179126617913417	-3.04421506374986
xdfrj1kuIi6eqToKQg	F12	coagulation factor XII	0.0682373584513671	7.42544661221926	2.62372656772395	0.0106776401222797	0.179126617913417	-3.04475423462698
fSohbtLKju5enuxurs	LY6E	lymphocyte antigen 6 complex, locus E	-0.0394970274401103	11.0131324310565	-2.62320258560436	0.0106925679605618	0.179183959106594	-3.0459721032158
EVIDw2AtEIJFtndorU	CCDC151	coiled-coil domain containing 151	0.0861761571993468	4.86330446511907	2.62231210979288	0.0107179804038357	0.179372607715477	-3.04804134333969
KqF5dW47VF.X0K3tM4	STX2	syntaxin 2	-0.0453571129384622	6.78004898151275	-2.62200109502742	0.0107268690765101	0.179372607715477	-3.04876392823705
6p2cSR6PJ6AXXqIXE8	CHTF8	chromosome transmission fidelity factor 8	0.0649605211208164	4.8900380428521	2.62016759920892	0.0107794058378375	0.180057714681817	-3.05302229774728
9_BWopor4kHEeZ5Noc	WDR74	WD repeat domain 74	-0.086603063016424	5.56731107542676	-2.61811777245652	0.0108384178928243	0.180849399523568	-3.05778023589319
oRj7p_O6QlgFH6d6A0	ST3GAL6	ST3 beta-galactoside alpha-2,3-sialyltransferase 6	-0.0476537879672002	6.4577869887242	-2.61726818079029	0.0108629624909618	0.180915184542025	-3.05975137033792
TJo86PHOIUElLnUJWg	CCL14	C-C motif chemokine ligand 14	-0.080661342907259	4.67181706187241	-2.61717602912778	0.0108656277727469	0.180915184542025	-3.05996513976958
fKALfp6FX9eero5LrU	FGR	FGR proto-oncogene, Src family tyrosine kinase	-0.0687887453696091	8.92156516254697	-2.61644231601012	0.0108868699848953	0.180915184542025	-3.06166695710741
ryI_CnsItSOuiUp7eo	DCTPP1	dCTP pyrophosphatase 1	0.0433860785838303	11.0939492113436	2.61637418886366	0.0108888442905882	0.180915184542025	-3.06182495551248
iSscIckqhFCHeRBSPk	SLC12A8	solute carrier family 12 member 8	-0.0427738290390725	8.86322227222829	-2.61554496915572	0.0109129009170333	0.181121579399119	-3.06374778820531
3fiSuiU653uumTj0eI	MARCH8	membrane associated ring-CH-type finger 8	-0.0572478565843916	5.27185905407515	-2.61475082529778	0.0109359851746529	0.181240308954711	-3.06558882029417
ooKJT36B6GH3gB6KGI	CDCA3	cell division cycle associated 3	0.0503335268374453	7.80681884530881	2.61421988663771	0.0109514432718807	0.181240308954711	-3.06681942038616
rkEx3SRcAy5agTLCp0	EGLN3	egl-9 family hypoxia inducible factor 3	-0.0791727650844516	5.24833426388335	-2.61409850181444	0.0109549801340174	0.181240308954711	-3.06710073537437
E16U4oQA8eLpXwIqC8	MYADM	myeloid associated differentiation marker	-0.0956204237167139	4.79086878609577	-2.61213186833103	0.0110124277820363	0.181953217917663	-3.07165701796712
ZVAgF_IkgCJNHlJyWU	MRPL44	mitochondrial ribosomal protein L44	-0.0404066704811068	8.70429210914758	-2.61182396040379	0.0110214468458605	0.181953217917663	-3.07237012404199
EOSjqN7rQKEpiie6mQ	ZMYM3	zinc finger MYM-type containing 3	-0.0505009959293359	7.05226805921306	-2.61099822391591	0.0110456669561273	0.182159897429015	-3.07428216842872
0j14cFXd8icSYnk8Uk	LAMP2	lysosomal associated membrane protein 2	0.0452481970365583	8.79475536905236	2.60873748957563	0.0111122251088633	0.1830636195712	-3.07951451957788
WiUpFdd7R_efol8HUg	FSD1	fibronectin type III and SPRY domain containing 1	-0.0756589372869248	4.64652308730028	-2.60717078598963	0.0111585636152509	0.183527626461938	-3.08313840621784
lsWeUEVPhddv.lZfdQ	ZNF296	zinc finger protein 296	-0.0454711034327633	9.50668219969902	-2.60633767654064	0.0111832758947233	0.183527626461938	-3.08506471954361
NX6XAl_vdAer1_oXWo	BABAM1	BRISC and BRCA1 A complex member 1	0.0348621988236996	9.00881527455894	2.60594331410141	0.0111949910578022	0.183527626461938	-3.08597638825827
9Iz0y7ygEUBeXO5TdE	VPS37A	VPS37A, ESCRT-I subunit	-0.0361583612800371	8.40019960553767	-2.60588904124638	0.0111966041905251	0.183527626461938	-3.08610184491226
lUECOC9XNxoCk4eopU	LAP3	leucine aminopeptidase 3	-0.0366003437904808	11.0511327412717	-2.60569810546307	0.0112022809828811	0.183527626461938	-3.08654319345909
0ofRQkgMVokZTUQrnk	MCM5	minichromosome maintenance complex component 5	0.0505705679809357	9.23620513294852	2.60502705109686	0.0112222531050435	0.183527626461938	-3.08809412815304
B6qKIV_gC13fVJ1494	NUP210	nucleoporin 210	-0.0443966139565953	7.92313502347006	-2.60500491723949	0.011222912409543	0.183527626461938	-3.08814527817249
xeS0eEuVKneq7d0ScM	HLA-F	major histocompatibility complex, class I, F	-0.0393351048781512	11.2226837684547	-2.60302624608903	0.0112819935546961	0.184248029328266	-3.09271643675606
ZNUn_KKV46EFXV6T28	XRCC1	X-ray repair cross complementing 1	0.0472384906542674	7.22020658952814	2.60271455577147	0.0112913259947807	0.184248029328266	-3.09343625057861
utE_0gSunnu65TYtXk	PARP12	poly(ADP-ribose) polymerase family member 12	-0.0478631183484794	7.97515567076774	-2.60234263546084	0.0113024709666299	0.184248029328266	-3.09429506681315
EUoUKdKji6iI6vMe1c	EXO5	exonuclease 5	0.0607220156435461	6.29589263510074	2.60097597741534	0.0113435100176036	0.184428548360498	-3.09745001228143
9RUlKiCvfZ0s4IAkFQ	ZDHHC13	zinc finger DHHC-type containing 13	-0.047879818750663	6.67389746747379	-2.60095401125627	0.0113441707363366	0.184428548360498	-3.097500710366
0TGiwnneXu4unXqVwE	SRD5A1	steroid 5 alpha-reductase 1	0.0655949041024203	6.04229615290732	2.60079068146228	0.0113490846177644	0.184428548360498	-3.09787766598336
6dJUitVe1CarPUUpTM	OPA3	optic atrophy 3 (autosomal recessive, with chorea and spastic paraplegia)	0.0674525001170821	4.95693440292688	2.60013062894699	0.0113689623902488	0.184475933037682	-3.09940083185538
ryp1AF7kPXFIlueHVo	MORC2	MORC family CW-type zinc finger 2	0.0434744456541971	6.18262566016733	2.59990714435537	0.0113756998789937	0.184475933037682	-3.09991648312245
Bfpd4KqCsuoMrriIHQ	THG1L	tRNA-histidine guanylyltransferase 1 like	0.0883129594011469	4.62061618357898	2.59942271934233	0.0113903164864054	0.184520756566451	-3.10103408420436
il0V5OcojoXt3MSSyM	GALM	galactose mutarotase	-0.107188421402309	5.89523757166058	-2.59865445099595	0.0114135324555213	0.184704649966275	-3.1028061824273
KquSiX96P6O6c6AgRI	COX7A2L	cytochrome c oxidase subunit 7A2 like	0.0336705257581075	10.7045868207898	2.59748280111476	0.0114490206621235	0.185086556249157	-3.10550790274505
xS4p6KeiuiOq0oE3pI	TNIP2	TNFAIP3 interacting protein 2	-0.0607483959346963	6.24758823945468	-2.59659342411213	0.0114760258465846	0.185330674667665	-3.10755806287032
WFCuSI6EIklKIVJjeI	PLIN2	perilipin 2	0.0460990382540499	7.92684795891692	2.5959945789329	0.0114942417981592	0.185432493589371	-3.10893817647305
cXQeqnZ8u6eeuoACSI	CHMP2A	charged multivesicular body protein 2A	0.0476165809184169	9.57256474834932	2.59382804236577	0.0115603637022151	0.186306151258886	-3.11392905936637
xeKJg1kuq0Ip4sIllA	FEN1	flap structure-specific endonuclease 1	0.0473337818016693	8.06229526381522	2.59230612228927	0.0116070181243829	0.18686458961778	-3.11743295375483
6lZNddzXv2KyIn6R94	ATP6V0A2	ATPase H+ transporting V0 subunit a2	0.046253476451008	7.81393013480427	2.59103362684693	0.0116461573664604	0.187066157946539	-3.12036131170227
NS5e5.uguV4AECoxJU	GFM2	G elongation factor mitochondrial 2	0.0565572473096405	6.24961836559311	2.59072973926742	0.0116555219754491	0.187066157946539	-3.12106046584252
xeJXvpSdUTV3nX.zr0	UBTD2	ubiquitin domain containing 2	0.0547108268140753	6.74537187102821	2.59072764080414	0.0116555866654768	0.187066157946539	-3.12106529354393
WneoUdII6ju6uijl_0	NUDT16L1	nudix hydrolase 16 like 1	0.051833282155342	7.50940632204789	2.58988766811709	0.0116815069320785	0.187289083335323	-3.12299746874728
xp6k.U0zIXeV9Isl0U	CENPA	centromere protein A	0.0397565209709705	8.57882581945725	2.58940469892419	0.0116964342616513	0.187335482083732	-3.1241082028753
K46fTjUkS5dEQIHPq4	POGLUT1	protein O-glucosyltransferase 1	0.0472886232796386	7.66186780717352	2.58856447050497	0.0117224447511037	0.187426670222974	-3.12604015939923
Be1Z5u.1342oHXn3X4	MT1X	metallothionein 1X	0.0909184061004454	7.25616779829948	2.58844310534075	0.0117262061149266	0.187426670222974	-3.12631917474778
WiYU99fJKFcke0SF6I	SNORD14D	small nucleolar RNA, C/D box 14D	-0.0809385035568903	4.8123056175479	-2.58791613178855	0.0117425508297091	0.187495416735294	-3.12753054916878
lQeP60vn1Dnr4.V0_4	SNRK	SNF related kinase	-0.0413791574273664	8.23674924458333	-2.58638470035648	0.011790167238513	0.18784177194337	-3.13104976502121
HVQLQkIhy_CoveqUp0	CD53	CD53 molecule	-0.0393103025736616	10.2828796634556	-2.58626097337655	0.0117940218775056	0.18784177194337	-3.13133401415197
3fFSV60IN7ik7h4LHA	GRAMD3	GRAM domain containing 3	0.0399970672180846	7.85025495451646	2.58568727716845	0.0118119099600245	0.18784177194337	-3.13265187277283
fogblc9Ed6ghnDe4Tc	PLCG2	phospholipase C gamma 2	-0.0364944278730314	11.7034990784958	-2.58566817214736	0.0118125060850822	0.18784177194337	-3.13269575550418
iokLvXnlL39d.Kbr4g	DNAJB9	DnaJ heat shock protein family (Hsp40) member B9	-0.077228902863646	8.5542727908391	-2.58462341965236	0.0118451465381565	0.188168613577572	-3.13509506605551
BgKUlFL0okfqLjcrjk	ATXN3	ataxin 3	0.0520735561321439	6.99777885605323	2.58357699312107	0.011877921172903	0.188304001956491	-3.13749742598007
iliJRH9CwFK66IVTX4	CRIP1	cysteine rich protein 1	-0.0646948597416285	11.0613023894926	-2.58356185994016	0.0118783957541571	0.188304001956491	-3.13753216252116
6ogot05FFzRHV0TXv0	HSPA1L	heat shock protein family A (Hsp70) member 1 like	0.0577184192063065	5.22146441617782	2.5831934045746	0.0118899559303206	0.188304001956491	-3.13837785964596
QlKVx3yVfTTtN1fOeg	ZFAND2B	zinc finger AN1-type containing 2B	-0.0435601596198524	7.55972821193689	-2.58238812949565	0.0119152566758885	0.188401801826241	-3.14022582360065
lzC5T77Cuu.XIX1eOY	KDM2B	lysine demethylase 2B	-0.0345455011776177	10.6548183543973	-2.58222668364268	0.0119203349690935	0.188401801826241	-3.1405962565583
reWD4IpeP0nUUjkj_4	GBE1	1,4-alpha-glucan branching enzyme 1	-0.0527242571322689	9.28598004730703	-2.58054093268449	0.0119734776308888	0.18904979691448	-3.14446303240726
0p6J6iK54nBLlBC518	COQ8A	coenzyme Q8A	0.0631029242192203	6.5314175766397	2.57852280309767	0.0120373805407092	0.189866200869059	-3.14908949979717
NUuorH4NPmuv1Xuc90	GYPE	glycophorin E (MNS blood group)	0.0689929515800771	5.18586375970227	2.57808925558269	0.012051148806825	0.189890976340741	-3.15008300043014
iXftIjXcUSE8MniSiU	B4GALT5	beta-1,4-galactosyltransferase 5	-0.0385116532714674	8.76987227933168	-2.57689203689544	0.0120892432388721	0.190298623602387	-3.15282578973755
uxKXrHumdbgPIbzSC0	H3F3A	H3 histone family member 3A	0.0339362036673815	12.2151659223411	2.57518697519446	0.0121436850018958	0.190962513241933	-3.15673022966398
0on4A3lkg6WUu8SeQo	PLAUR	plasminogen activator, urokinase receptor	-0.0906257099021094	5.14494360470037	-2.57415718532172	0.0121766730840158	0.191164085190743	-3.15908733158845
rpIgopQglBTQglXQ5c	TCF7	transcription factor 7 (T-cell specific, HMG-box)	-0.0737881453400962	4.47539625513695	-2.57402036822993	0.0121810619546003	0.191164085190743	-3.15940043621071
ipeYnqAoSOKoXbl9_c	SLC8B1	solute carrier family 8 member B1	0.0442630946503255	6.5549402465574	2.57335931195645	0.0122022877492158	0.191304346102509	-3.16091306513207
3nq_5PCpS.H7eXf4UU	ADAP2	ArfGAP with dual PH domains 2	-0.0689770141210218	5.5220965157747	-2.57277492250683	0.0122210797301015	0.191406206477083	-3.16224999989844
W666S6S4IsRzP2UKq0	RAP1GDS1	Rap1 GTPase-GDP dissociation stimulator 1	0.062723276453827	6.64675511126962	2.57210151102935	0.0122427668390498	0.191508102575538	-3.16379028587626
W6TMoe6re7uy4i7slE	NDFIP2	Nedd4 family interacting protein 2	-0.0369602343018046	9.42275203633427	-2.5718014204416	0.0122524424235252	0.191508102575538	-3.16447657302152
ZTm7jaB0r8RAeKqVSU	PARP6	poly(ADP-ribose) polymerase family member 6	-0.0390033750587395	6.3527277384948	-2.57142806568801	0.012264489868179	0.191508102575538	-3.16533031879783
6S0SU1qAN0zSV_KCUI	GART	phosphoribosylglycinamide formyltransferase, phosphoribosylglycinamide synthetase, phosphoribosylaminoimidazole synthetase	0.0453332404161223	7.38217953585902	2.57054709782677	0.0122929595238972	0.191758858537963	-3.16734441456408
EuJ6gF0V_RbXSS1ECQ	GSTT1	glutathione S-transferase theta 1	-0.0750117421264682	6.47185064865728	-2.57016939852763	0.0123051836895828	0.191758858537963	-3.16820774901169
EZ5UWI.XQu5MjeIoto	PCGF2	polycomb group ring finger 2	-0.0577141162080366	5.58059801323234	-2.56946801839194	0.012327912908551	0.191920948160322	-3.16981066810956
urk.B5.fTU4YT1RTqo	S100PBP	S100P binding protein	-0.0310996297874734	8.2127932197298	-2.56893294970784	0.0123452781086113	0.191999290304556	-3.17103326137318
fviotJEtf3kn3BUoU4	GPATCH4	G-patch domain containing 4	0.0499773013014859	8.70240940807102	2.56744991019055	0.0123935246523915	0.19230347309691	-3.17442080801064
ciUoKIeRL.gJElbStY	RBCK1	RANBP2-type and C3HC4-type zinc finger containing 1	-0.0345185744885908	9.04361306091117	-2.56727173645523	0.0123993325014224	0.19230347309691	-3.1748276830313
ZSUd4kjeB87S0dUMSo	TIGAR	TP53 induced glycolysis regulatory phosphatase	0.0430131873202315	8.00253762357727	2.56681457854409	0.0124142455386447	0.19230347309691	-3.17587153641438
oXcV9m5.t6gt.6VTtI	CTPS2	CTP synthase 2	0.0350044587560342	8.20815170514254	2.56661521231682	0.0124207541833225	0.19230347309691	-3.17632671235289
oqeOni_zvHB_leHr7k	TMEM123	transmembrane protein 123	0.0377258094824444	10.3373643988208	2.56643625894879	0.0124265990451883	0.19230347309691	-3.17673525869469
6gvUShST_ikXkhS2Ao	MRPS23	mitochondrial ribosomal protein S23	0.044752558195357	8.02058974018912	2.56459583745154	0.012486854279839	0.192884247427044	-3.18093554164551
9SqOJnFL9P7KSovdZo	FAM89A	family with sequence similarity 89 member A	-0.0848235732496022	4.44530163539542	-2.56364171197826	0.0125181961791258	0.192884247427044	-3.18311211147588
EQ0tLfx4SiSSc3t.54	STK38L	serine/threonine kinase 38 like	-0.0511948561270352	5.89149904217856	-2.56348713833251	0.0125232804341423	0.192884247427044	-3.18346466535904
EuCFC1IHg1wgOSh5Ag	OAS3	2'-5'-oligoadenylate synthetase 3	-0.091761065484684	4.68213433212067	-2.56343011831548	0.0125251564149705	0.192884247427044	-3.1835947130618
urtdTVUuX0TfijOfew	PECR	peroxisomal trans-2-enoyl-CoA reductase	-0.0348200494975371	8.13713271460165	-2.56215102817065	0.012567305842234	0.192884247427044	-3.18651135815906
Tq_3QNe1EKQdSCAglc	SYT15	synaptotagmin 15	-0.0682565647518788	5.35068790713723	-2.56196952963032	0.0125732970847407	0.192884247427044	-3.18692512336911
Z5IJBLqpEqKgd_EeJQ	SNN	stannin	-0.104229224322545	6.05242338365793	-2.561906432983	0.012575380501671	0.192884247427044	-3.18706896019813
3W.fA7xS1SUN8a4TxI	SEPT3	septin 3	-0.0786897414015041	5.44133753174688	-2.56190437923365	0.0125754483206025	0.192884247427044	-3.18707364193198
lLIqO6uWeI0pLX4oyE	BMP4	bone morphogenetic protein 4	0.0766274507032738	5.51290504950796	2.56185048803687	0.012577228034472	0.192884247427044	-3.18719649138274
xS4Hwzv3uIuEie5W.M	B4GALT6	beta-1,4-galactosyltransferase 6	-0.0549731090560138	6.59654972996233	-2.56118915632631	0.012599086545306	0.192884247427044	-3.18870387907845
iWqO3o54QqIlCx7w5Q	UPRT	uracil phosphoribosyltransferase homolog	-0.0398590066042392	7.74072725887841	-2.56086658380208	0.0126097607587027	0.192884247427044	-3.18943900968857
QjpTeSFCCQldBIHg3E	DDX60L	DEAD-box helicase 60-like	-0.0652729030230137	5.36907095274215	-2.56058622311036	0.0126190447872899	0.192884247427044	-3.19007787937285
rs0reFUugBAlAQB4FE	ROBO1	roundabout guidance receptor 1	-0.0647084758742969	5.16168322382811	-2.56040057665424	0.0126251957944603	0.192884247427044	-3.19050088814388
N0qV5ruHZqdJ6_taWw	EIF3CL	eukaryotic translation initiation factor 3 subunit C-like	0.0552955051876796	6.71687995743343	2.55903957326957	0.0126703726612204	0.193384668225372	-3.19360126287368
ZJx.1LL_Uf3WKy.p50	COQ10B	coenzyme Q10B	-0.0446934395715249	9.09952411123648	-2.55760455267375	0.0127181647123897	0.193774630247466	-3.19686878290901
Bf3tFEiPpca.e.4q54	DTNA	dystrobrevin alpha	0.0867299651096951	4.53636805364185	2.5575250704203	0.0127208165540153	0.193774630247466	-3.19704971878598
Ekol9fEfZTi.XjYdSQ	GPR89B	G protein-coupled receptor 89B	-0.0505181665668036	5.95918408646641	-2.55610525636393	0.0127682714576026	0.193969588257514	-3.2002810493961
o_l7siVXXuV0untv7w	ARIH2	ariadne RBR E3 ubiquitin protein ligase 2	-0.041195620858467	8.35843465000132	-2.55605782501083	0.0127698595300516	0.193969588257514	-3.20038897215581
6V04FQT4y1fgRE55Yk	UBE2C	ubiquitin conjugating enzyme E2 C	0.0485108030452254	10.1315997428081	2.55602395749545	0.0127709935742518	0.193969588257514	-3.20046603147887
QQpYKJISRZ9_qL7gpM	ZNF37A	zinc finger protein 37A	-0.0881242101674469	4.59999884273731	-2.55509525800585	0.0128021263154158	0.194252926392196	-3.20257878998134
fcj6pM.eMCFRdy4j00	ZFAND1	zinc finger AN1-type containing 1	-0.0459265351273276	6.7955787070279	-2.55427679031891	0.012829620620347	0.194420430865961	-3.20444025195089
QrfotBVJV0CRXl0OiE	RASAL3	RAS protein activator like 3	0.0596989249607601	7.17228774648798	2.55394897025693	0.0128406478498165	0.194420430865961	-3.20518568401607
rLu7XeK5_IC7EeSB5U	FEZ2	fasciculation and elongation protein zeta 2	0.0428111700780842	8.23693479185915	2.55305404973547	0.0128707948670888	0.194420430865961	-3.2072202489299
H6UGT8Qf5U2PVlJN7g	LGALS14	galectin 14	0.0768907355821715	6.883903328453	2.5527213184533	0.0128820198268923	0.194420430865961	-3.20797655030277
i6g.p9Md.f5BJLverg	RNF14	ring finger protein 14	0.0397053944654739	8.13378880353101	2.5527158486209	0.0128822044300276	0.194420430865961	-3.20798898260685
EpFEkeqdF36_Nd_x6g	TOM1	target of myb1 membrane trafficking protein	0.0371066211735014	7.85086513419951	2.55228450807685	0.0128967694118165	0.194420430865961	-3.20896930142227
T1aLrJnt164KLP7RHo	TIMM10	translocase of inner mitochondrial membrane 10 homolog (yeast)	0.0450385920883699	8.97469431402788	2.5521715867494	0.012900584858976	0.194420430865961	-3.20922591815012
c_kCmmcJlFsCx5mEM0	HIST1H4J	histone cluster 1 H4 family member j	-0.0527204125442405	5.441498749938	-2.55172772965331	0.0129155920317006	0.194458352755818	-3.2102345047769
r6q6edenDnzyAO121U	RBKS	ribokinase	-0.066526468335831	5.29856822407118	-2.54887335050623	0.0130124784935831	0.195607236992406	-3.21671712880496
WieWpBdI4WH.V.iXS8	EBI3	Epstein-Barr virus induced 3	-0.0662681573979417	11.0333815188466	-2.54845760936177	0.01302664469554	0.195607236992406	-3.21766082695055
3ZI6Kh14TJSee4DDoI	CDKN3	cyclin dependent kinase inhibitor 3	0.0486725032846889	8.93757183194741	2.54808996480063	0.0130391836352323	0.195607236992406	-3.21849524430635
0nq.nRd4Z4eYD4guoI	CTNNAL1	catenin alpha like 1	0.0415866459830539	8.39309060591691	2.54800280967528	0.0130421577593858	0.195607236992406	-3.21869303972621
oX.3Us5xeP7_npRyuk	OARD1	O-acyl-ADP-ribose deacylase 1	0.0414684245783611	8.48194380420301	2.5475003249444	0.0130593167510173	0.195676076207736	-3.21983330218064
EUuyelHzUqf.cfTRCg	RNASE4	ribonuclease A family member 4	-0.0689624591440227	5.42424678611033	-2.54480682425556	0.013151643351557	0.196869984324077	-3.22594236835129
KUzo0FE5E18cSDW1.Q	PLPP3	phospholipid phosphatase 3	-0.0791727579551747	5.61028339867608	-2.5437215438125	0.0131890104567828	0.197089472035758	-3.22840236421782
fSJ4Q4R3oE_TF97E94	HSD17B7P2	hydroxysteroid 17-beta dehydrogenase 7 pseudogene 2	-0.0459820757871069	7.91984349501143	-2.54364568961019	0.0131916257619001	0.197089472035758	-3.22857426998921
NRfUEpXehAxCPSmNhk	ATP5S	ATP synthase, H+ transporting, mitochondrial Fo complex subunit s (factor B)	-0.0490401726977152	6.27627241596175	-2.54235916577385	0.0132360539987813	0.197098985751963	-3.23148923188961
3K5fXeeCXxdfdFSwa8	DCAF5	DDB1 and CUL4 associated factor 5	-0.0358382551283671	7.58382632736105	-2.54225167041033	0.0132397723060119	0.197098985751963	-3.23173273625723
ZV6asDyg3kc.6KELJE	EIF2AK3	eukaryotic translation initiation factor 2 alpha kinase 3	-0.0533709615819408	7.29413548406546	-2.54221311754588	0.0132411060946997	0.197098985751963	-3.23182006624554
ZN6rJtT5e9dObmJbo4	SIVA1	SIVA1 apoptosis inducing factor	0.038348413802988	10.0665911113911	2.54189199046664	0.0132522206380184	0.197098985751963	-3.23254744126284
xShz6fSOnvqkDjR7UU	RPP40	ribonuclease P/MRP subunit p40	0.0467060714297335	9.05056682734	2.54176411002494	0.0132566490587777	0.197098985751963	-3.23283707823131
BuImZn5oZppPAa_Smw	PCNA	proliferating cell nuclear antigen	0.0615075876337555	6.17044239135058	2.54142999223844	0.0132682256595618	0.197098985751963	-3.23359376642392
KntX6g6ldIoS59QsTc	STRADB	STE20-related kinase adaptor beta	0.0445316353210937	7.07834179971213	2.54101066713417	0.0132827674645294	0.19712690551744	-3.2345433106738
oFQt91bU9S0Dep0dFU	SRC	SRC proto-oncogene, non-receptor tyrosine kinase	-0.0478170553412716	8.09425317535682	-2.5396982386825	0.0133283743286233	0.197615363379054	-3.23751441622274
BeKE6RJkoCCSeM5wKQ	DNM1L	dynamin 1 like	-0.0455879762798468	7.48701454554206	-2.5376156781423	0.0134010335250167	0.198503606010904	-3.24222636903856
KqjdRv41v9JLneCizc	GGCT	gamma-glutamylcyclotransferase	0.0403089690054324	8.99983495856859	2.53516198547703	0.0134871000389795	0.199588567877218	-3.24777394910824
3Xl44qgHEkXoA4HRUY	SERPINA1	serpin family A member 1	-0.0807361930340538	4.56680079915023	-2.53377163652351	0.0135360895315802	0.200117993575059	-3.2509154403545
ZerORAhTgh81C5OFo8	RBMS1	RNA binding motif single stranded interacting protein 1	0.0825980709327938	4.3889718573666	2.53341774623111	0.0135485846112611	0.200117993575059	-3.2517148280477
9ZUVJphPsSHXdF3IyQ	SEC14L1	SEC14 like lipid binding 1	-0.0443609388239142	7.85315201755519	-2.5324200076314	0.0135838686115005	0.200448973027336	-3.25396808150273
BEK5wBK9FWMek3TUKU	HIST1H2BG	histone cluster 1 H2B family member g	0.0564043106806728	6.61676125098719	2.53171337310972	0.0136089081572386	0.2006282975302	-3.25556347421489
BdXXenNcV7e6nf8cUk	SNX11	sorting nexin 11	0.0380891184518381	9.78454047401655	2.53061260531636	0.0136479967763236	0.200723670811219	-3.2580479833675
ZBOF1i99nlSdalSN3g	GGT1	gamma-glutamyltransferase 1	0.0780519027624504	4.72776589573727	2.53031483826877	0.0136585879753985	0.200723670811219	-3.25871991105834
K3THV0_1J4HF7VeotI	NABP2	nucleic acid binding protein 2	0.0448399506658649	7.86559700952517	2.53017849925102	0.0136634398574804	0.200723670811219	-3.25902754576702
ZSpO9Ks0qUKtcCh8n4	SCARNA10	small Cajal body-specific RNA 10	0.0557724715496692	7.20245298832204	2.53007986637437	0.0136669508645871	0.200723670811219	-3.25925009199386
Wf3ftUn3Veql4iFdF8	CHD4	chromodomain helicase DNA binding protein 4	0.0446400020145003	7.96255948853664	2.52895038094695	0.0137072149208193	0.200920923260576	-3.26179804959324
NnsV.1LpIgX14Ckte4	DHRS4-AS1	DHRS4 antisense RNA 1	0.0464290854971829	6.37434961597594	2.52733572334534	0.0137649603312564	0.200920923260576	-3.26543885586779
xNS4iDi.l33566LJI4	DLGAP5	DLG associated protein 5	0.0515867924433673	9.4753732224021	2.52710611891749	0.0137731895315588	0.200920923260576	-3.26595642293714
xkFFEWNPSSU0EuKQh4	ZNF621	zinc finger protein 621	0.03818239010258	7.54785344840112	2.52694703062836	0.013778893981559	0.200920923260576	-3.26631501198602
0N_dK6StSaAuN5NVAI	AKR1A1	aldo-keto reductase family 1 member A1	0.0312532552942411	10.3900796944681	2.52688341290794	0.01378117572715	0.200920923260576	-3.26645840273012
Td9zVITqUK57N4qO54	RCOR3	REST corepressor 3	-0.0446589897881203	8.04346266523393	-2.52681051343554	0.0137837907958746	0.200920923260576	-3.26662271035479
iHXTXVINxS.OsgI6gU	SUCLG2	succinate-CoA ligase GDP-forming beta subunit	-0.0414511958816555	8.93941108622971	-2.52669218345529	0.0137880365125728	0.200920923260576	-3.26688940516198
cUt9Hq9U94q1HHQA.k	XCL1	X-C motif chemokine ligand 1	-0.124164315986165	4.63871043928167	-2.52637011014989	0.0137995985796344	0.200920923260576	-3.26761524910319
ERnd6rhyNRKBQBkv1A	TANGO6	transport and golgi organization 6 homolog	0.0667865179004461	5.01898172653022	2.52612140113964	0.0138085329353749	0.200920923260576	-3.26817570255514
N7RuSgS4pKhKr3nX3Q	SLC39A14	solute carrier family 39 member 14	-0.0482119073231739	7.05546642013871	-2.52609611254013	0.0138094416680894	0.200920923260576	-3.26823268661215
BKkne5N4pf5X5.mrS8	SNX8	sorting nexin 8	0.0395936145256001	9.35800022819734	2.52518824134545	0.0138421013021714	0.201208060758361	-3.27027812591888
c6x5B5.XflSA7.l338	LRRC31	leucine rich repeat containing 31	-0.118105891194697	4.59094311869627	-2.52328940390688	0.0139106351655135	0.202015642030517	-3.27455425543708
H1t9fdfepeVO__Irfo	LCE1B	late cornified envelope 1B	0.0840596348591719	4.65766073740037	2.52024189627269	0.0140212673362711	0.203432516207892	-3.28141160465819
xhfWtwbdEUYaHVfXDA	ITPKA	inositol-trisphosphate 3-kinase A	0.0591367438347736	6.00557869885618	2.51962057280407	0.0140439200637137	0.203516451373964	-3.28280883542558
cpd7qTZTcRdTjhyYQc	TMEM8A	transmembrane protein 8A	-0.0497217444733362	6.40747445817695	-2.51936635872122	0.0140531979205428	0.203516451373964	-3.28338042939928
Q5XFd56nv7Pi_Q7hSY	LARGE1	LARGE xylosyl- and glucuronyltransferase 1	-0.0415125597626643	7.99882322487042	-2.51825956283573	0.0140936562412001	0.203912676917289	-3.28586847664327
oq.teU5_rvTUvQofUU	TATDN3	TatD DNase domain containing 3	0.0556235801163069	7.2188152828886	2.51744538677258	0.0141234850056378	0.204011668516819	-3.28769814560542
H11VOByAFHx1SD0rbk	TIMM23	translocase of inner mitochondrial membrane 23	0.0304146654741422	11.6060281295129	2.51735752807567	0.0141267072624056	0.204011668516819	-3.28789555810244
01OVCvVK5KEiu6XPsU	C17orf53	chromosome 17 open reading frame 53	0.0481952592808274	8.57642562119122	2.51386464830248	0.0142553482868443	0.205678648868946	-3.29573920564614
Ncfo3les3SjruUuhUg	TLR6	toll like receptor 6	-0.0495927524814464	6.3191421722483	-2.51256821294342	0.0143033633677918	0.206073339142374	-3.29864820262822
u6kmanY7u0lCyetUeg	UBL7	ubiquitin like 7	0.0546964734597157	5.66059809394395	2.51241148683058	0.0143091777757519	0.206073339142374	-3.29899978727061
olEtGUeT3NepBI6IX4	C9orf64	chromosome 9 open reading frame 64	0.0472797553832901	6.42654192407068	2.50926217499078	0.0144264669141163	0.207388355104271	-3.30606081176401
lpPfy6SngpSKgTTniU	HSD17B4	hydroxysteroid 17-beta dehydrogenase 4	-0.0339193161601939	9.3964043051594	-2.50916575550791	0.0144300714699243	0.207388355104271	-3.3062768768018
0eL0eWt7fWJ5ve1_04	PKMYT1	protein kinase, membrane associated tyrosine/threonine 1	0.0658752287597666	5.63918929805241	2.50888816969213	0.0144404532973426	0.207388355104271	-3.30689887651114
TqnWl6jv3gf6i8yiEo	KCND1	potassium voltage-gated channel subfamily D member 1	0.0894640369463333	4.57338736362049	2.50821367374873	0.0144657077778238	0.207559574825034	-3.30841001422953
HF1uvR6LwJDapvsSdE	COA5	cytochrome c oxidase assembly factor 5	0.0399370595435822	7.64186081353873	2.50732823267514	0.0144989208634155	0.207602438186938	-3.31039324190865
9lls.P7RYq7uZnZpq4	EHBP1L1	EH domain binding protein 1 like 1	-0.0510713065057605	7.63054289171736	-2.50711698622815	0.0145068549053462	0.207602438186938	-3.31086631005124
6lnt5uCKErd4FLNeT4	CDC25C	cell division cycle 25C	0.0643672853565301	5.86921022006392	2.50686457735296	0.0145163400630875	0.207602438186938	-3.31143151462031
opErJ0vz_f3FeXpR_c	SPATA18	spermatogenesis associated 18	0.0692388886183245	4.88118743324734	2.50671307670993	0.014522035918909	0.207602438186938	-3.3117707386059
lcMoLltIJjB4YIcde0	SNORD49A	small nucleolar RNA, C/D box 49A	0.0746999010066602	5.47435013682608	2.50625144666427	0.0145394038911718	0.20766003649336	-3.31280426641538
ul141JapUj1HivItT8	REC8	REC8 meiotic recombination protein	-0.0355598653215502	9.31684650196104	-2.5052430844926	0.0145774067278209	0.208011977945661	-3.3150613060095
KUUCNfV_6ySiCf6OV0	HEATR3	HEAT repeat containing 3	-0.053374472033751	6.31571662624659	-2.50353573849643	0.0146419566660644	0.208574775046253	-3.31888118159783
97mJIg3F.UfcJe.fXU	MIR155HG	MIR155 host gene	-0.0560761483989025	11.6847210355492	-2.50341789062763	0.0146464216440537	0.208574775046253	-3.31914476515068
oh5KdV9eRRT7dJLApg	DENND6B	DENN domain containing 6B	-0.0634917116158293	9.65830022421635	-2.50313775267346	0.0146570403327724	0.208574775046253	-3.31977129235091
0zHXK16hIMvGF3qEoE	ZNRD1	zinc ribbon domain containing 1	0.0452822775814434	6.97001162558842	2.50217066632891	0.0146937512426614	0.208734698831609	-3.32193372997564
il3lrnnmV5onWBG5kg	MATR3	matrin 3	0.0786671721811541	4.93847967639369	2.50213532390445	0.0146950944192859	0.208734698831609	-3.32201274371413
clyu1_J4FkeCB37XR4	CDCA5	cell division cycle associated 5	0.0444388085479028	9.99210957403931	2.50112729373972	0.0147334508321347	0.208956314354287	-3.32426596978314
ZXbvj5KKLaDwV3n9TU	OXNAD1	oxidoreductase NAD binding domain containing 1	0.056898111402383	6.00378465257738	2.50101994970858	0.0147375406706711	0.208956314354287	-3.32450586904244
NfUlLd7FkbWif23GHs	FOXC1	forkhead box C1	-0.0802320808498501	5.2833260279557	-2.50023901133311	0.0147673254292047	0.20918810034746	-3.32625090288845
WKgj5UpR4SiY1XDoxU	UBR7	ubiquitin protein ligase E3 component n-recognin 7 (putative)	0.0429797574402297	7.85702422743559	2.49975730087504	0.0147857247371328	0.209258329734258	-3.32732707636904
BrwCBBHD4T5up.91f4	WRB	tryptophan rich basic protein	-0.0440030327481202	7.07429005443921	-2.499331752213	0.0148019960678052	0.209298342219429	-3.32827763764974
Zqc8g6i5AHjksglfGk	HNRNPLL	heterogeneous nuclear ribonucleoprotein L like	-0.0851786562945706	6.26778059720177	-2.4971397381193	0.0148860658306857	0.210164824721509	-3.33317188233678
rkXp95EdeYC2uBPR1E	PRMT2	protein arginine methyltransferase 2	-0.0506710679191736	6.09440612470018	-2.49703028167974	0.0148902750300504	0.210164824721509	-3.33341617913033
91IOifLnHgxXpRIlF0	SLC4A7	solute carrier family 4 member 7	0.0624957073500522	5.8870908269178	2.49666072555141	0.0149044944019643	0.210167253440597	-3.33424092911671
lQqIKzLoOLuJNqf5LU	NEK3	NIMA related kinase 3	0.0604741710855494	5.74865969285112	2.49610537261942	0.0149258856413007	0.210167253440597	-3.33548013729323
cUBHdXFT15Sd5df9B0	BTG2	BTG anti-proliferation factor 2	-0.0526498048003829	9.06529086619406	-2.49569650402254	0.0149416522121517	0.210167253440597	-3.3363923358837
Kb93lrZDoIIjZZnrT4	ACTG1	actin gamma 1	0.0325913583084246	12.5335235645557	2.49562407057676	0.014944446914102	0.210167253440597	-3.33655392423807
Bt5C9BrTJ7V1KVQX5c	NRM	nurim (nuclear envelope membrane protein)	0.0571480560682359	6.14695408949522	2.49526027852316	0.0149584902305671	0.210174888004936	-3.33736543192931
0SEu6Kp5wOV0r0cQJE	FAM49A	family with sequence similarity 49 member A	0.0791587674527347	4.76686346020208	2.4932560584472	0.0150360714822393	0.210935762308109	-3.34183446821231
xX7dOhfRSFxdAkUSTk	CCNA2	cyclin A2	0.0372629319553974	9.72845158081383	2.49316147775685	0.0150397415314749	0.210935762308109	-3.34204529187052
Wcqct9XxdAp3RxboUU	HSPA5	heat shock protein family A (Hsp70) member 5	-0.0468288977541278	7.70686539380038	-2.49109499358123	0.0151201295328043	0.211872346144643	-3.34664990069367
3gqSEvfeq_knnT046U	STX4	syntaxin 4	-0.0851922640404596	7.78976171878465	-2.48934231188125	0.0151886130967456	0.212422918636069	-3.35055280077143
NK6TUmKnG573FB45KI	USP21	ubiquitin specific peptidase 21	0.0510443958408312	6.00991186209847	2.48922009411563	0.0151933989743431	0.212422918636069	-3.35082487223141
TltFCxFJ1AwOhk70BU	HIST1H2BH	histone cluster 1 H2B family member h	-0.0685673503336543	5.98701134051929	-2.48904251090432	0.0152003553032233	0.212422918636069	-3.35122017407648
uWeCeygmU99Xs3B6p4	SCPEP1	serine carboxypeptidase 1	0.0369644241571336	8.80772657582633	2.48833600465556	0.0152280591036366	0.212432450950324	-3.35279263154572
0K7_5JS31xRzq7r56g	UBA5	ubiquitin like modifier activating enzyme 5	-0.0390519115127659	8.78953007616077	-2.48830190437488	0.0152293974054562	0.212432450950324	-3.3528685185135
QjIAoqJx3SnkJpBLlQ	HLA-H	major histocompatibility complex, class I, H (pseudogene)	-0.0405988841966555	9.65761305836238	-2.48798158682506	0.0152419737738638	0.212432450950324	-3.35358131294744
Bc6IklhFV3xJbo79eg	P2RY8	purinergic receptor P2Y8	0.0378160370143611	9.4554124494675	2.48741255861535	0.0152643381059433	0.212553860137143	-3.3548473689354
uWg4gnAgr7in5Wr2I0	POLR1C	RNA polymerase I subunit C	0.0370654400005714	8.50159032034991	2.48637684968703	0.0153051200005109	0.212776518336881	-3.35715114625063
c7i4oKf4jr9JXJRR4U	LOC285074	anaphase promoting complex subunit 1 pseudogene	0.0410693272535561	7.90234788124999	2.48631234435797	0.0153076631897036	0.212776518336881	-3.35729460220651
ln3dLd7f4M3g73pX0E	CACNB4	calcium voltage-gated channel auxiliary subunit beta 4	-0.066090041590097	5.72322646128639	-2.48538792581448	0.015344151117925	0.213051595195485	-3.35935011363709
BJnZRnS5W.xQwHiYVQ	EEF1A2	eukaryotic translation elongation factor 1 alpha 2	-0.149670637704392	5.24208358676986	-2.48511791955358	0.0153548233433539	0.213051595195485	-3.35995037226252
NFN_lLhC72ipJIihQk	COPS3	COP9 signalosome subunit 3	0.0320177739457303	10.4909533890135	2.48436284086047	0.0153847039094321	0.21327610904901	-3.36162872167538
6S13FNeR7iSRzF7m_0	WASL	Wiskott-Aldrich syndrome like	-0.0448922872350576	6.72985092210017	-2.48345484512185	0.0154207050644519	0.213584996835754	-3.36364640596227
6euf8DUi6h5eZede80	KMT5B	lysine methyltransferase 5B	0.0498614314033181	6.5014764092623	2.48303038454573	0.0154375604838357	0.213622854855718	-3.36458940221204
KW6.sdAlSDVQuXn.jg	CDH1	cadherin 1	0.0816726729664201	5.53516533677204	2.4826952051718	0.0154508822307001	0.213622854855718	-3.3653339536248
cRRCU0r306pK4DH3FU	NEDD9	neural precursor cell expressed, developmentally down-regulated 9	-0.0594517996157305	6.35568017572664	-2.4823003168493	0.0154665903783544	0.213650291934535	-3.36621103246922
Qr1.dJZ94eePdW9G_U	IL2RA	interleukin 2 receptor subunit alpha	-0.0947362935847781	5.59214709900727	-2.48161245401082	0.0154939869646892	0.213838997399186	-3.36773855447921
x7UUsw6T57t6R9PsSE	FAM13B	family with sequence similarity 13 member B	-0.0353031332459156	9.04653163518461	-2.48094408185641	0.0155206490481473	0.21391398814675	-3.36922245691254
lfhIT13jgQLlUu.qAk	GEN1	GEN1, Holliday junction 5' flap endonuclease	-0.0569210431989427	5.2918236084295	-2.48078748663665	0.0155269017603949	0.21391398814675	-3.36957007749851
TlKmqmq5P1NfsBX0yw	JDP2	Jun dimerization protein 2	-0.0714472785775299	5.61060415679362	-2.47940657260502	0.0155821385738859	0.214485175347706	-3.37263473356906
fpnvXlHteCO4OrrGP0	SEMA4D	semaphorin 4D	-0.0307171640255509	10.1652051939594	-2.47871569848645	0.0156098399002655	0.214676667462309	-3.37416745485141
cU1e4pDq6g4yhKQIgk	AK2	adenylate kinase 2	0.0333153150659278	9.812625677378	2.47802178726217	0.0156377075500089	0.214735248071088	-3.37570655651635
3lAV0uJ9fQvRLiJQLU	ZNF626	zinc finger protein 626	0.0535387596671306	5.98995582265919	2.47769717611134	0.015650759360369	0.214735248071088	-3.37642642409758
rpB1LSBJIDCblvSrUg	TNFSF13B	tumor necrosis factor superfamily member 13b	0.04986126627666	8.10716009706956	2.47749942766326	0.0156587151336022	0.214735248071088	-3.3768649186432
Hgiv395FKKKbnQs2sY	PMM1	phosphomannomutase 1	0.0333393657822205	8.61694238409603	2.47723714145447	0.0156692729836046	0.214735248071088	-3.37744647664443
rrfezgklCu.pfaJKCc	IARS	isoleucyl-tRNA synthetase	0.0419206241870132	9.9164050351083	2.47659417322194	0.0156951815587362	0.214897152723854	-3.37887189090149
02ed7lfr7.uute21ds	OTP	orthopedia homeobox	0.081404608820121	5.65934263048837	2.47597201243233	0.0157202883347836	0.214897152723854	-3.38025088357386
6VAoUIjUX0g6E49Kic	PTPN12	protein tyrosine phosphatase, non-receptor type 12	-0.0474291102828042	7.74690144189503	-2.475917285515	0.0157224985195574	0.214897152723854	-3.38037216964597
HHUKlAnQOVFMgYe1OE	CASP4	caspase 4	-0.0346880697053085	9.23844539658147	-2.47385036066273	0.0158061774163063	0.215851377207945	-3.38495126620565
rXqjeT9wSnXlVCHnes	UBOX5	U-box domain containing 5	0.084303485205652	4.62689891914804	2.4723240017131	0.0158682282691086	0.216296325757778	-3.3883307422327
oonHKO31JdeS0KLFHs	SKP1	S-phase kinase associated protein 1	0.0373979616535181	8.65119070330754	2.47195349059177	0.0158833235743732	0.216296325757778	-3.38915082050632
lu_lLiOC3XQKCkk7tc	STEAP2	STEAP2 metalloreductase	-0.0747025354216063	4.9000150025187	-2.47193319295324	0.0158841509101265	0.216296325757778	-3.38919574373892
olLt.f65f170k98l7o	PAM	peptidylglycine alpha-amidating monooxygenase	-0.0535657425795281	9.6889646041559	-2.47168343364415	0.0158943343182745	0.216296325757778	-3.3897484920498
rin51zp1PXuughuOEk	TMEM5	transmembrane protein 5	0.0322925644123436	8.72767017894697	2.47050595328209	0.0159424226353357	0.216761253787691	-3.39235377579611
NateJLikjswwyld_gQ	SNRPA1	small nuclear ribonucleoprotein polypeptide A'	0.031773470169233	11.2957967900711	2.46967963271621	0.015976247573918	0.217031607531201	-3.39418146902525
B0R6ZwlcQu0oe6AJfU	ZNF274	zinc finger protein 274	0.0589641067207355	6.06148170541803	2.46876294293496	0.0160138471284936	0.217352721967208	-3.39620844933292
QgvLMSUgSUJdD37F_4	TMEM154	transmembrane protein 154	-0.0459832320139565	8.40627991250975	-2.46828078500547	0.0160336555140817	0.217432011361694	-3.39727434329676
BVFEEdN7QEUJHdJdVk	RBCK1	RANBP2-type and C3HC4-type zinc finger containing 1	-0.0428238578852394	7.53746927935047	-2.46748815286107	0.0160662668663348	0.217684632354308	-3.39902621771104
BlYnvsz4rs8.G3etS0	BCAS1	breast carcinoma amplified sequence 1	0.11079776122912	5.29439803095342	2.46623331612321	0.016118016557752	0.218092510398649	-3.4017986977787
Wk4n1OuC33sUORSIOU	KPNA5	karyopherin subunit alpha 5	0.0571424015189259	5.38089861549076	2.46607807577552	0.0161244290902044	0.218092510398649	-3.40214160956086
fRrtH9Tq9Lzea0FGt4	SHPK	sedoheptulokinase	0.0395175031485958	8.79336174568984	2.4655780279921	0.0161451002029947	0.218092510398649	-3.40324604729688
iq.jDdUtfLAj4iKeiQ	GOLT1B	golgi transport 1B	0.0482244082384211	7.30911967672726	2.46505474886808	0.0161667571339487	0.218092510398649	-3.40440159546715
oV3C3nUlXACr3CCnNE	HIST1H2BB	histone cluster 1 H2B family member b	0.0737038621436934	4.58858850248732	2.46473749907617	0.0161798998344525	0.218092510398649	-3.40510207314874
6qnE.vT9SSyTAfGuE4	SH3YL1	SH3 and SYLF domain containing 1	-0.0504692175423015	6.12282441763046	-2.46417607441835	0.0162031814722754	0.218092510398649	-3.4063414972457
feh8QDlCquHoL7ozSo	KLF4	Kruppel like factor 4	0.0918904277865427	4.65143303238822	2.46401523914541	0.016209856666884	0.218092510398649	-3.40669652043425
c8nQmvF105aH9ze1N0	VTRNA2-1	vault RNA 2-1	-0.0528090304620849	6.69485412395157	-2.46386477733595	0.016216103563543	0.218092510398649	-3.40702862805349
9kJPYNcHn_OR_V2pF4	APOLD1	apolipoprotein L domain containing 1	0.0715079217411071	5.09786842694353	2.46326136061244	0.0162411780322338	0.218092510398649	-3.40836035298382
BoRmitKWuCmkoJ6JGM	WDR45	WD repeat domain 45	0.079311734942779	4.59084891288808	2.46307347182272	0.0162489926942293	0.218092510398649	-3.40877496312891
ZylTut6lfUuf6XxlfU	ORAI1	ORAI calcium release-activated calcium modulator 1	-0.05817839050554	6.00700690699125	-2.4628152056523	0.0162597399978394	0.218092510398649	-3.40934483050703
H55X9ekqeui31dAk5c	HMCES	5-hydroxymethylcytosine (hmC) binding, ES cell-specific	0.0433366874565677	8.73480534518194	2.46270137931984	0.0162644787109989	0.218092510398649	-3.4095959738516
oSbw17OlKAeLIde7BU	MCMBP	minichromosome maintenance complex binding protein	0.0613306348886599	5.41286935845797	2.46118459578093	0.016327742480481	0.218752405280661	-3.41294164056901
K326gpVLFHbKK3Sd6Q	BRF1	BRF1, RNA polymerase III transcription initiation factor 90 kDa subunit	0.0567811829679877	5.03522284977542	2.45986572317881	0.0163829309782999	0.219303069191894	-3.41584936570883
N7pDE5QXqXrowUEI6o	DHRS7	dehydrogenase/reductase 7	-0.0367026776036063	10.5411697305338	-2.45910085173796	0.016415013827629	0.219402638225137	-3.41753508627616
WUI4XU92khcIvl3i8k	RAB38	RAB38, member RAS oncogene family	0.0738760159240569	8.36487887161417	2.45898973484777	0.0164196793592057	0.219402638225137	-3.41777994338605
Bqn4ye61XdV3hxcA0M	PFKFB3	6-phosphofructo-2-kinase/fructose-2,6-biphosphatase 3	-0.066311733644291	5.83746589089255	-2.45868099676853	0.0164326487776535	0.219402638225137	-3.41846022998908
0hRBOKUeiGTOLCpHho	BID	BH3 interacting domain death agonist	-0.0508240328227206	8.08271885419702	-2.45752505579612	0.0164812890387813	0.219863502789844	-3.42100664673817
ccBtFCun3X6eIjoKbo	TPI1	triosephosphate isomerase 1	0.0653126550524322	11.7982494293945	2.45680407615449	0.0165116921591781	0.2200804996011	-3.42259438350391
ZVXl7VQPgjX1_Xun44	POLR2A	RNA polymerase II subunit A	0.0307567473550296	9.67885747967769	2.454298303172	0.0166177503082767	0.22117108047344	-3.42810955776528
lu1E3IKd0_S_.EvCsU	MIB1	mindbomb E3 ubiquitin protein ligase 1	0.0657825874349523	5.90839585997834	2.45419990989982	0.0166219272966293	0.22117108047344	-3.42832602427477
0nu9VB3veZGASze.ik	CEP55	centrosomal protein 55	0.0376870933716028	9.17753048094	2.45353680002303	0.0166501021892087	0.221356781282323	-3.4297846859525
ifq.oxXy6jjsDIpycU	PTP4A1	protein tyrosine phosphatase type IVA, member 1	-0.0604262749315041	7.08548024586698	-2.4521637802383	0.0167085766861399	0.221764439254702	-3.43280391077408
EpR5.vDh13A5Mu45jU	UNC13C	unc-13 homolog C	0.0679836036910005	6.69364921029819	2.45192535104304	0.0167187497155323	0.221764439254702	-3.4333280648761
3eooU6i470Zd4S4DGY	EIF3F	eukaryotic translation initiation factor 3 subunit F	0.0399211059150388	11.1640233703392	2.45181405582125	0.0167235002367048	0.221764439254702	-3.4335727176925
rsFGq1N.xN6xEQSGdI	HSPA4L	heat shock protein family A (Hsp70) member 4 like	0.0413106247785996	7.52446015896254	2.45119225994773	0.0167500632322175	0.22177690335636	-3.43493939923353
0lsEgje4Io66.kXvXg	GXYLT1	glucoside xylosyltransferase 1	0.0484099269930064	6.49974097642197	2.45084528553472	0.016764902353343	0.22177690335636	-3.43570190879299
HNNSZTaXpn0lBmoujo	RPL13	ribosomal protein L13	0.0632161071582828	5.92091330232269	2.45034602740287	0.016786274908756	0.22177690335636	-3.43679891828861
95LUl4qd9pA7JOpF0g	IL6	interleukin 6	-0.102736163999874	4.96074251587033	-2.45031910108565	0.0167874282815863	0.22177690335636	-3.4368580776209
T3uWaAWO6CFWK6Lung	ATRIP	ATR interacting protein	0.0534072230151233	7.199767567082	2.44985020285183	0.0168075246572079	0.22177690335636	-3.43788819854702
9j7hf8j2u_J3u_zx9c	SPAST	spastin	0.0504409076344621	6.98451010429454	2.44958778374842	0.0168187810157451	0.22177690335636	-3.43846463432807
ZE9ZUN7Fo56SorpIic	EIF6	eukaryotic translation initiation factor 6	0.0384353885058273	9.59220363915887	2.44946243930411	0.0168241599989633	0.22177690335636	-3.43873995059212
lVXcAmQlLTFXszfJJE	NTNG1	netrin G1	-0.0979823233099736	4.30985909635582	-2.44762971015004	0.0169029854013529	0.222275683634998	-3.44276415528445
xlyunxSVC1U7_h.SeE	BRK1	BRICK1, SCAR/WAVE actin nucleating complex subunit	0.0416008746628889	8.10346782311895	2.44708550731219	0.0169264551588675	0.222275683634998	-3.44395860111312
Bqmbg17osSTbjoP3YU	SMPD4	sphingomyelin phosphodiesterase 4	0.0623762483631641	4.79956366828771	2.44693586175412	0.0169329140209506	0.222275683634998	-3.44428701238341
6tTcTr_2qE.B06K5.I	NIFK	nucleolar protein interacting with the FHA domain of MKI67	0.0320654449634836	9.39787889878606	2.44687496783484	0.0169355428999856	0.222275683634998	-3.44442064502109
xeqH7t5qjUiZEqLkTM	CYP1A1	cytochrome P450 family 1 subfamily A member 1	0.119984422954378	4.38057682603407	2.44655496607632	0.0169493638560959	0.222275683634998	-3.44512284811276
riESqIOUTgnopIj6Lg	METTL15	methyltransferase like 15	0.0470544351272322	6.87676608303734	2.44644510075809	0.0169541112980405	0.222275683634998	-3.44536391586299
0kqGqV3iFTdECOLrgA	SNORD17	small nucleolar RNA, C/D box 17	0.0681234264041995	5.47612705707601	2.44617238293317	0.0169659009890825	0.222275683634998	-3.44596227737184
6EoLV_U1wCUVR93cKI	ACTB	actin beta	-0.0292955824137071	13.6439923924983	-2.44593383170955	0.0169762196712496	0.222275683634998	-3.44648562932819
03Ut1FCR7_skvrHIoU	ERCC8	ERCC excision repair 8, CSA ubiquitin ligase complex subunit	0.0481624133579001	5.87203183306185	2.44508394902865	0.0170130276203762	0.222570431927746	-3.44834982044728
uqUR_J4tFIVz59BLn4	GGA3	golgi associated, gamma adaptin ear containing, ARF binding protein 3	-0.0533424029016776	6.17397129254335	-2.44442415641164	0.0170416521850773	0.222757717226938	-3.4497966816439
Th3rxI_343fo3XSN.o	PBK	PDZ binding kinase	0.043649137684609	8.20900194626595	2.44160317375565	0.0171645256860805	0.224175617349749	-3.45597914177376
QgiTqkMBSRLd4Ufom0	NFKBIE	NFKB inhibitor epsilon	-0.048317088651801	9.37722132472149	-2.44114003270551	0.0171847744165138	0.224249498793587	-3.45699359042539
fuaP7h95zhef3nqhOk	PLEKHF2	pleckstrin homology and FYVE domain containing 2	-0.0613266184905179	5.99049233508081	-2.44081514044949	0.0171989916212451	0.224249498793587	-3.45770512751225
HS7IIMXTuSOcrpKUt0	HYPK	huntingtin interacting protein K	0.0743666184642297	4.80361097297108	2.44021605314425	0.0172252351729327	0.224403733198507	-3.45901696355392
3UokRtcj0h76UwFUdo	KSR1	kinase suppressor of ras 1	-0.0505679261648094	5.29331976859191	-2.43934168087476	0.0172636022314438	0.22453867687834	-3.46093111441037
ipRJRd5N9gdJTutBN4	CD2	CD2 molecule	-0.100536989521513	4.76194968190849	-2.43917605734372	0.0172708783365741	0.22453867687834	-3.46129362809315
Te_uuOj.sn55_.RR60	FEZ2	fasciculation and elongation protein zeta 2	0.0365592654592332	7.3394652395321	2.43899438333049	0.0172788627248362	0.22453867687834	-3.46169124909379
ionKKZiSIG7u8ogdp8	NRDE2	NRDE-2, necessary for RNA interference, domain containing	0.0426663697086075	6.70439008269035	2.43846657594144	0.0173020780879964	0.22464898232354	-3.46284629470253
r1kXotIm6P.s.na65U	DLL3	delta like canonical Notch ligand 3	-0.0678778007618696	5.2071377579599	-2.43814556243194	0.0173162113815678	0.22464898232354	-3.46354869348595
o3eVzqne15FXSo6YSQ	DGAT1	diacylglycerol O-acyltransferase 1	-0.047599706815023	6.16154695200757	-2.43767623250604	0.017336893232348	0.224730019851119	-3.46457547916716
rqeVdVeRLL_17r8.7M	GRM2	glutamate metabotropic receptor 2	0.0861388597109053	4.71661408920167	2.43729869987118	0.017353545931147	0.224758737983441	-3.4654013135231
WieqgQYhS8gbFCLIes	VTI1B	vesicle transport through interaction with t-SNAREs 1B	0.0483078764949028	7.67920906905632	2.43689961378938	0.0173711649161216	0.224799913062495	-3.46627417864657
Te4VV0giY1VcQvr17E	RNASE6	ribonuclease A family member k6	-0.0497783859584402	6.30036094759966	-2.43462592582166	0.0174718505077	0.225838701018976	-3.47124481618277
Z_qltWdcKSgjrpZAgg	RPL30	ribosomal protein L30	0.0296304358288192	13.3101553580243	2.43437912612668	0.0174828109117821	0.225838701018976	-3.47178412529296
QokLN76nN4rXnFPX6U	EARS2	glutamyl-tRNA synthetase 2, mitochondrial	0.0452478011849513	7.38422122062829	2.43410581452195	0.0174949558985666	0.225838701018976	-3.47238131508889
xBtfe1NurBJfqirkic	CHMP1A	charged multivesicular body protein 1A	0.0445984966515096	7.97586835126016	2.43265691430062	0.0175594661186318	0.226483652472957	-3.47554624546966
o0GIwm6C6HaNVmSXH0	CAD	carbamoyl-phosphate synthetase 2, aspartate transcarbamylase, and dihydroorotase	0.0514117420745688	7.23102374180013	2.43213477648635	0.0175827657250149	0.226596437754166	-3.47668639956468
rHcKiOqeKEnQAoihKU	KAT5	lysine acetyltransferase 5	-0.057558739782575	5.38698061462538	-2.43039540125465	0.0176605825553312	0.227411041539617	-3.48048306734884
33.2oLUV1b06Ua76LU	PPDPF	pancreatic progenitor cell differentiation and proliferation factor	0.0559653797996891	6.05835626411099	2.42931648535846	0.0177090063244254	0.227846124345995	-3.48283695671395
oHgJ3l9aDV3C3n4yLo	ANXA7	annexin A7	0.0248460090187882	10.2903875489365	2.42877005285715	0.0177335765582455	0.22797383968519	-3.48402878392195
iLe0X4lqYme6lCSq_Q	ATP5G1	ATP synthase, H+ transporting, mitochondrial Fo complex subunit C1 (subunit 9)	-0.0665216241345016	6.67777106205593	-2.42791031535784	0.0177722962773169	0.227981639451099	-3.48590350785208
9iFKOnl5SKK4SnkAS8	ACBD6	acyl-CoA binding domain containing 6	0.043438671764751	7.33800010047517	2.42780330046702	0.0177771211647927	0.227981639451099	-3.4861368231607
xO1_IgFCz_JUnl6OX0	GSTM2	glutathione S-transferase mu 2	-0.0622639863999632	5.02832987173491	-2.42778123790705	0.0177781160260556	0.227981639451099	-3.4861849231803
QeSdz1iV8kVPWFMsw0	CADM1	cell adhesion molecule 1	0.0496189122172161	6.25861177554704	2.42666656840434	0.017828444439905	0.228438866699952	-3.48861460985885
lroSr3SxwkKISDn_9c	ANKRD29	ankyrin repeat domain 29	0.111366635553403	5.2734337076645	2.42568538878244	0.0178728511484636	0.228501805756332	-3.49075254991524
lcOO8SHxsxX7MXqEqc	GAS2	growth arrest specific 2	0.0430979548142462	7.33421564590291	2.42540880864747	0.0178853866206833	0.228501805756332	-3.49135507292559
KkWOREWRVFHsd4D6Ys	RNPS1	RNA binding protein with serine rich domain 1	0.0335006852923324	9.16533548760417	2.4251488888496	0.0178971741660159	0.228501805756332	-3.49192124931853
9BLd1lWRSNCy.oTRXE	PHLDA1	pleckstrin homology like domain family A member 1	-0.0596686062808923	5.87213935015156	-2.42500417927972	0.0179037398592079	0.228501805756332	-3.49223644429261
9ELo3n5SLX.5V1eUXU	FOXM1	forkhead box M1	0.0561123069848686	6.06914842510663	2.42493796548571	0.0179067447984793	0.228501805756332	-3.49238066070067
c6CV0UJH1KHhSKWZtQ	XRCC6	X-ray repair cross complementing 6	0.0437823926247411	10.6958357449996	2.42415789609831	0.0179421801974662	0.228766471182764	-3.49407943589599
3VPbe1SJ8_lHq3R14s	G6PD	glucose-6-phosphate dehydrogenase	0.0558167691625329	6.25576297656218	2.42349458896643	0.017972360911311	0.228957958828575	-3.49552357478961
fV6qIhyAESCgkkSohU	HEXDC	hexosaminidase D	-0.0591461262418678	6.51963897823979	-2.42267535094312	0.0180096992356412	0.228957958828575	-3.49730674595705
3IklSutNItFDlDlJeQ	RPS29	ribosomal protein S29	-0.0691642300596619	10.0085853134204	-2.42264821705182	0.0180109371007992	0.228957958828575	-3.49736579752261
0s5LuCiSCk33R7nkDc	UBE2E3	ubiquitin conjugating enzyme E2 E3	0.0343364655593841	9.20011260289929	2.42253667680586	0.018016026436601	0.228957958828575	-3.49760853705513
KkABFFdQSXfKLEV73k	TXLNG	taxilin gamma	0.0512223838993097	6.50046118868521	2.42184347168334	0.0180476847185341	0.229097804832727	-3.49911691505535
936Se__l1.A9x8Xi9I	MON2	MON2 homolog, regulator of endosome-to-Golgi trafficking	-0.048832510749677	8.23844799091043	-2.4214972543728	0.0180635148954858	0.229097804832727	-3.4998701302276
6pd51515eTvd3vvol4	ARF5	ADP ribosylation factor 5	0.0365248228329532	8.22634343536478	2.42132974694667	0.0180711783359834	0.229097804832727	-3.50023451961138
64lqX3LbLl9KtYok0o	SERINC2	serine incorporator 2	-0.0767225663458778	5.20466625824951	-2.42087838583164	0.0180918425227426	0.229173152476856	-3.50121628845697
3kHOgnuANNELl3gJi4	METTL7A	methyltransferase like 7A	-0.0789160187668566	5.24412716455968	-2.41972654883695	0.0181446716933328	0.229655486928297	-3.50372098728404
0f3U31HvLlLiQx77kE	PLS1	plastin 1	-0.0635892093680836	4.99620482689026	-2.41906390305674	0.0181751265311684	0.229780288690097	-3.50516147431352
EeeRurNIJFCwHN1KlI	WDR92	WD repeat domain 92	0.0480228343973831	7.37100422522246	2.4188698963415	0.0181840516229573	0.229780288690097	-3.50558315156723
HoggJAr.qDmCqXT.p4	NUSAP1	nucleolar and spindle associated protein 1	0.0478510539853895	9.31177561247607	2.41671546311718	0.0182834280615921	0.230848668339713	-3.51026394561205
3p6aIMB5Sogg4ghKIQ	TP53TG1	TP53 target 1 (non-protein coding)	-0.0669100682945848	5.13603238062385	-2.41638444080709	0.0182987399311588	0.230854767624214	-3.51098282562029
oon0If5P1yz97_0vdA	HSPA1A	heat shock protein family A (Hsp70) member 1A	-0.0748351610863315	6.84375611328111	-2.41459362764399	0.0183817753453389	0.231714557551608	-3.51487049534412
uo5XRPrn910105Vf5Q	NLRX1	NLR family member X1	0.0390717102929141	7.71428807701243	2.41403196548935	0.018407887498999	0.231855981055353	-3.51608930725248
WFH.Emu.Qmh7R0jeSI	ZCCHC7	zinc finger CCHC-type containing 7	-0.0378925394383396	9.93768027423536	-2.41363648661916	0.0184262935434404	0.231900192307421	-3.5169473571329
ZXxeqQvJT7dUtO.FFQ	TMTC1	transmembrane and tetratricopeptide repeat containing 1	-0.0731993073354802	5.65818467200132	-2.41287294617495	0.0184618761598532	0.232160329609528	-3.51860363709786
QrDm7p4OpMFHun37nk	TNFRSF19	TNF receptor superfamily member 19	0.0499619701857606	7.76362238645835	2.41231901589853	0.0184877289325926	0.232297791785796	-3.51980495308002
K1V9o7p_J7KZoqWiGc	CBX3	chromobox 3	-0.0378387833981387	9.22564907757014	-2.41113700277578	0.0185430035383844	0.232713873719387	-3.52236762624131
N3iD8AJRR71S0kzEJ0	ANKRD17	ankyrin repeat domain 17	-0.0348620929223883	7.64760304785633	-2.41097181886447	0.0185507398050976	0.232713873719387	-3.52272567055836
Z0Yg7oquqrtLoCkwp4	IER2	immediate early response 2	-0.0719213713794707	6.22581233990353	-2.41015415940757	0.0185890767875141	0.232936386618971	-3.5244976845585
clzVB1EtKClxtfrUSE	KIF24	kinesin family member 24	0.0624658843256444	5.35379346061805	2.40995548866449	0.0185984024002686	0.232936386618971	-3.52492816328355
HR0Ih8yURBQ3efSHeo	NFIL3	nuclear factor, interleukin 3 regulated	-0.0537895286244541	6.1387809228115	-2.40806397865281	0.0186873996091209	0.23376942823612	-3.52902518415819
ZfV1_9Y95vVNtIQf6I	CEP41	centrosomal protein 41	0.0453007432596307	6.68202702558848	2.40790393564581	0.0186949472092734	0.23376942823612	-3.52937171415478
Hs5.f5fvXvdKuGHlFI	GRSF1	G-rich RNA sequence binding factor 1	0.0365274657597404	9.17270603627891	2.40675754279281	0.0187490905899886	0.234258300405251	-3.5318533530678
KSnTJJx7sgD1Vx9w.k	LMO4	LIM domain only 4	-0.0319258981349417	10.0110178533631	-2.40589876891113	0.018789741671665	0.234286394801939	-3.53371172190791
9x7QFJOvD7iTXeSTlU	DGKE	diacylglycerol kinase epsilon	-0.0554141169378256	5.61744035565215	-2.40578107945554	0.0187953187735503	0.234286394801939	-3.53396635601481
6eJh3H9Pv5Sbp2_e_U	ATP9A	ATPase phospholipid transporting 9A (putative)	0.0954911973864945	4.25834212733466	2.40532843953996	0.0188167823912155	0.234286394801939	-3.53494559478344
rooyfiVKL2IXl6kMyY	BCYRN1	brain cytoplasmic RNA 1	-0.0804497366393719	7.6288775856172	-2.40527771686705	0.0188191889608812	0.234286394801939	-3.53505531829192
rm2_tPoJ3QSo.rlB6I	RABL3	RAB, member of RAS oncogene family like 3	0.0401963689714127	7.60684603781307	2.4048311973433	0.0188403862345873	0.234286394801939	-3.53602114735751
9CeiB62cSPGe6qxJIo	UGCG	UDP-glucose ceramide glucosyltransferase	-0.0771933882328382	7.63298539030499	-2.40480491615539	0.0188416345254386	0.234286394801939	-3.53607798930161
NpeKFKCyJJK5ICJ6BI	SFI1	SFI1 centrin binding protein	-0.0688923452838771	5.28778073604441	-2.40378754759158	0.0188900138269373	0.2344249770332	-3.53827799098291
rlUqbpZ7xIBDAV46k4	YIF1B	Yip1 interacting factor homolog B, membrane trafficking protein	-0.0327168449817424	8.83423194869229	-2.40369323669912	0.0188945042434406	0.2344249770332	-3.53848189328669
TFHIEt_p6OrzIniae4	KANSL3	KAT8 regulatory NSL complex subunit 3	0.0341305035530651	9.94281157743497	2.40352666023701	0.0189024377640652	0.2344249770332	-3.53884201897069
6gFjughViui7p4pXi4	ATRIP	ATR interacting protein	0.0410430194909089	6.90395877440234	2.40330473451839	0.0189130120216919	0.2344249770332	-3.53932177294973
ff7kki6fEerdDOVd_k	CNIH1	cornichon family AMPA receptor auxiliary protein 1	-0.0391547367549628	8.90516779201193	-2.40196348691706	0.0189770319838067	0.235031371458952	-3.54222045867177
uAH3seV6DOp5VUSeno	KARS	lysyl-tRNA synthetase	0.0400826287531969	8.65650704947485	2.40055716461161	0.0190443658906592	0.235647484023002	-3.54525832137379
TNBCuu46deRKVhMo4o	FAHD2B	fumarylacetoacetate hydrolase domain containing 2B	0.0402232579425738	8.50930949312107	2.40007261206454	0.0190676153688959	0.235647484023002	-3.54630467938556
EeZqCVTnUNAqP.LLl0	DENND5A	DENN domain containing 5A	-0.0423424251699166	7.32395341061142	-2.39982947300926	0.0190792910538755	0.235647484023002	-3.54682965455922
97iSKtSXQjXdQKAmK4	CXCR4	C-X-C motif chemokine receptor 4	-0.0802799915896847	6.404561816203	-2.39966224577724	0.0190873251126031	0.235647484023002	-3.54719069828779
3pEp3lu1_i4CHf.FIo	TNFRSF10A	TNF receptor superfamily member 10a	0.0803583070445772	4.76534865768279	2.39858002251237	0.0191393911952054	0.236103044474609	-3.54952670743615
0qPD6klNkg_.upAqec	GTDC1	glycosyltransferase like domain containing 1	-0.0549648905495116	6.23470941565817	-2.39781337322271	0.0191763516284294	0.236290488225269	-3.55118100481993
0onxwe6.kVwR3okHy0	DONSON	downstream neighbor of SON	0.0330667406357419	7.96767563213002	2.39732491221564	0.0191999337332172	0.236290488225269	-3.55223478761259
QURHfkif0rvHSeTLxk	HSF2	heat shock transcription factor 2	0.0404144175898869	7.11883155309718	2.39683597929011	0.0192235645498859	0.236290488225269	-3.55328940756214
0kgkOi4F3nVREnpxHk	POP5	POP5 homolog, ribonuclease P/MRP subunit	0.0617991622454987	7.62928394392259	2.39668110573448	0.0192310552206519	0.236290488225269	-3.55362342941483
9JJBOiKQECAE1pCH3g	BCAS2	breast carcinoma amplified sequence 2	-0.0740798127083664	5.08036040664521	-2.39613803418899	0.0192573422121307	0.236290488225269	-3.55479454951449
Be4.iK4vPwilL.ShOo	KATNBL1	katanin regulatory subunit B1 like 1	-0.0633717113130327	5.17196526377921	-2.39584106631541	0.0192717302941782	0.236290488225269	-3.55543485877288
WWhNVCFdptN.rt069c	NUDT14	nudix hydrolase 14	-0.0509357379242512	6.2286333495544	-2.39579323315552	0.0192740487061685	0.236290488225269	-3.55553798831263
TrlEv8BSCukd7p1_yw	GORASP2	golgi reassembly stacking protein 2	0.0285352528861887	9.42622458537849	2.39575277683471	0.0192760097665784	0.236290488225269	-3.55562521184217
fUMXUW6J__OJ6JSIWE	POP7	POP7 homolog, ribonuclease P/MRP subunit	0.0560427460623844	7.31352652471936	2.39513005349854	0.0193062178427182	0.236474586448022	-3.55696764234374
KSM9BSSxv.zkt0FTNU	ACVR2A	activin A receptor type 2A	0.0854243175588013	4.57608646014036	2.39249198321592	0.0194346589144235	0.23786066822307	-3.56265138078228
cU5edXeFSfRdOhBX34	TUBG2	tubulin gamma 2	-0.0449662683010014	7.09499774999162	-2.39171441127866	0.0194726622099529	0.238138574457617	-3.56432565774996
fgCwEDsp6GW6dEXsNU	EGFEM1P	EGF like and EMI domain containing 1, pseudogene	0.0634583840961669	4.87057328223938	2.39138750554405	0.0194886592970183	0.23814713338774	-3.56502941812734
NQHgKQwNc7gToXd1ro	DHRS9	dehydrogenase/reductase 9	-0.0841427829031107	5.59439228917391	-2.38762881470942	0.0196734347381297	0.240216495688787	-3.57311527837466
cT6QI7Euuvy5LigOOo	LIN7C	lin-7 homolog C, crumbs cell polarity complex component	0.0809444123277947	4.84085626629834	2.38480483598187	0.0198132868176236	0.241591000168253	-3.57918329266105
Wf7V6p46VUHRSTThfs	ST6GALNAC4	ST6 N-acetylgalactosaminide alpha-2,6-sialyltransferase 4	-0.0386556329842249	7.65452883318536	-2.38472925787563	0.0198170418303481	0.241591000168253	-3.57934560767235
ESi4qOnqCDdSt7pX7s	ARRB1	arrestin beta 1	0.0729512221927008	5.40414659744401	2.38313383934613	0.0198964566613677	0.242369356263046	-3.58277098957474
fnXrfiO33bwosqX.oo	TFRC	transferrin receptor	-0.0331586373749161	12.302314056272	-2.38167783391624	0.0199691795296554	0.242711824004704	-3.58589536273007
T5N2a7u1H3VdH9V0VM	RAB6B	RAB6B, member RAS oncogene family	-0.0896688137226748	4.58171639134034	-2.38157721762989	0.0199742137398835	0.242711824004704	-3.58611121096653
ukoevq3qjc6TUIS4R0	OASL	2'-5'-oligoadenylate synthetase like	-0.0505775017420297	6.78655608942767	-2.38142389582546	0.0199818871810682	0.242711824004704	-3.58644011152647
ZS4J4QDQLpUqLt657k	IMPDH2	inosine monophosphate dehydrogenase 2	0.0376218148592122	10.8985391394975	2.38132312342498	0.0199869320641078	0.242711824004704	-3.58665627521974
KJMP.6z_pJ642_tWmU	RNU11	RNA, U11 small nuclear	0.129879034166955	7.94723572572918	2.38019865134899	0.0200433026453876	0.243206652831952	-3.58906782129814
xeSJevQDS0dX0gkhOk	GYG1	glycogenin 1	0.0376559648067621	9.26679778175751	2.37949115321728	0.0200788426387794	0.243217256490785	-3.59058463134114
fif7nggv.rqfy4e5.k	ELK4	ELK4, ETS transcription factor	-0.0538888760302707	5.42311462294657	-2.37942581066629	0.0200821278457252	0.243217256490785	-3.59072470048781
fo3_33p6K5.6K_rnqQ	SLC2A8	solute carrier family 2 member 8	0.0649145159805627	7.51732656052141	2.3792484928826	0.0200910452111479	0.243217256490785	-3.59110478485423
HRTi4lFJ3Ub1XTJLtE	ANO10	anoctamin 10	0.0536237998260262	5.78298830267441	2.3786159459009	0.020122884957517	0.243413421148892	-3.59246046778971
9uus7l7LVKeKQiDx_I	BIRC3	baculoviral IAP repeat containing 3	-0.0658537387299078	9.98733969295767	-2.37813937833591	0.0201469030624806	0.243514741363896	-3.5934816526881
oeU4FOffN0geF7oBV4	RALGPS2	Ral GEF with PH domain and SH3 binding motif 2	-0.0707720389863549	5.08323835787622	-2.37627181724183	0.0202412710943522	0.244465561207816	-3.59748178218375
x.WBQKeer_TvxIdVeo	SMARCD2	SWI/SNF related, matrix associated, actin dependent regulator of chromatin, subfamily d, member 2	0.0456575921226822	7.17453767163525	2.37564532596646	0.020273015891372	0.244544597872095	-3.5988230697943
rqpHMlHAYruAp0Io4U	AIM1	absent in melanoma 1	0.0548182524630452	6.56462969315631	2.37520296693099	0.0202954572844855	0.244544597872095	-3.59976995932082
3GKWp_1WlHjzYpj3jc	SCARNA2	small Cajal body-specific RNA 2	-0.0803652743867709	4.55052329871384	-2.37496888541393	0.0203073414698604	0.244544597872095	-3.60027096116565
fXnqgt6JV54hj_gt28	UGGT2	UDP-glucose glycoprotein glucosyltransferase 2	-0.0450998398890767	6.64996736615633	-2.37490378256957	0.020310647806309	0.244544597872095	-3.60041029258792
ZU0JaSINVRGd4KFR.Q	NVL	nuclear VCP-like	0.0562883064431835	7.04533733750969	2.37385600150117	0.0203639268260551	0.244847575338257	-3.60265228288741
u7S5ceXkz54o46oroQ	MAPKAP1	mitogen-activated protein kinase associated protein 1	0.0464928889567256	6.88501456846958	2.37354039990505	0.0203799993609427	0.244847575338257	-3.60332742791497
E6TRKkiWoJjg.oh3uo	TNFRSF1B	TNF receptor superfamily member 1B	-0.0562971745273362	9.52899248298551	-2.37348161256013	0.0203829944526196	0.244847575338257	-3.60345317930828
ip0d0fgiqN_u_yx_h4	GRPEL2	GrpE like 2, mitochondrial	-0.0420950681951432	8.46180334178063	-2.3730970018324	0.0204025992400838	0.244894113315054	-3.60427583118875
fChff_BFO1QiiCmnxc	PRKDC	protein kinase, DNA-activated, catalytic polypeptide	-0.0593661024565407	5.454813228531	-2.37278483948426	0.0204185234625479	0.244896435489172	-3.60494343894982
K9jjedE9ed3Fx9_s9Y	CWF19L2	CWF19-like 2, cell cycle control (S. pombe)	0.0368405479455799	7.32255240506772	2.37235849032003	0.0204402905466608	0.244968778468372	-3.60585513315305
iRlc5L3iCuikUp0Aig	FCRL5	Fc receptor like 5	-0.0649284836545269	7.05794486031446	-2.37108788940242	0.0205052832367361	0.245558653407314	-3.60857133309787
Bn7Gglc7ng4XopIJSU	NOP16	NOP16 nucleolar protein	0.047579729021971	8.38451459093748	2.36997398330439	0.0205624121923287	0.246053522682685	-3.61095155080969
oO6K6evVOBuvtIpqoQ	SLC38A5	solute carrier family 38 member 5	0.0720384778738336	6.61267110073083	2.36851329009494	0.0206375416886702	0.246762864062379	-3.61407135828013
0gZMaTvDh3jrtdd6kk	NDEL1	nudE neurodevelopment protein 1 like 1	-0.0297772948473113	10.0355587632979	-2.36797029989949	0.0206655321996689	0.246907908890596	-3.6152306842244
NX9dVdU5sIb3uwXU8A	BCL9	B-cell CLL/lymphoma 9	0.0387910204872211	6.74751069546572	2.36471372572607	0.0208341154057253	0.248536014828167	-3.6221790063811
NXyV97r7Tp8O7t.Ugc	GTPBP3	GTP binding protein 3 (mitochondrial)	0.0462127113878088	8.40826602354233	2.36440459497084	0.0208501816543245	0.248536014828167	-3.62283815669368
QvlB771JTURKLe94ro	RPRD1A	regulation of nuclear pre-mRNA domain containing 1A	-0.0368730522361565	9.13696481227232	-2.36436965942542	0.0208519980299763	0.248536014828167	-3.6229126441352
NJoDUIHXLHeFJSpSpI	DHRS7B	dehydrogenase/reductase 7B	-0.0452177211156056	6.98625614350361	-2.36381800610952	0.0208806983794291	0.248536014828167	-3.62408872234893
3LpbJp__jC6CMjjCXs	SPCS2P4	signal peptidase complex subunit 2 homolog (S. cerevisiae) pseudogene 4	-0.0411844147385455	8.57269700556692	-2.36365603877155	0.0208891315786596	0.248536014828167	-3.62443397894431
ZVVu_VLjdWL6L7uqks	SLC35G6	solute carrier family 35 member G6	-0.0654656781135214	4.84668064636028	-2.36329673766066	0.0209078502371868	0.248536014828167	-3.62519980934191
6PlAxH.UD_1QSV7CUk	FAM188A	family with sequence similarity 188 member A	-0.0349524153874258	7.86921203983173	-2.36285138706226	0.0209310725773542	0.248536014828167	-3.6261489127955
odcFEQ3V1uC3_kvVEM	UTP14A	UTP14A small subunit processome component	0.0452482258319526	7.26829828679226	2.36236530431	0.0209564450597317	0.248536014828167	-3.62718464940712
ieV56egF6y4BDDVI1I	PRDX4	peroxiredoxin 4	-0.0279165281987847	10.1956604260503	-2.36231882905416	0.0209588724024259	0.248536014828167	-3.62728366862787
Zop4h2p4v5oitLBwPo	TPM1	tropomyosin 1 (alpha)	0.0674254592126881	4.6874975552366	2.36226956349889	0.0209614457521444	0.248536014828167	-3.62738863100395
3Y4rXiEoIQJ4JTtaUw	CKAP5	cytoskeleton associated protein 5	0.0526714451035036	5.64363652061078	2.35995737110316	0.0210825382331773	0.249781548869182	-3.63231277299611
B6kued8DXF9R0HVMQc	CD302	CD302 molecule	0.0643685288946119	5.09040051323141	2.35923756414494	0.0211203623262508	0.250039392163553	-3.63384487136062
uqdk1AIMwR1CTgIukk	FAM26F	family with sequence similarity 26 member F	-0.0692439623012982	5.49059273904254	-2.35855937442493	0.0211560547812948	0.250193375852373	-3.63528802619587
HnxHU1AXB3lBR.3XNI	ZNF614	zinc finger protein 614	0.0325640146815584	6.91291703980767	2.35813131142417	0.0211786109387336	0.250193375852373	-3.6361987427438
0SU5CShIOuHq5X64ns	TMED3	transmembrane p24 trafficking protein 3	-0.0309619447930662	11.0701873733055	-2.35807495691667	0.0211815820512223	0.250193375852373	-3.6363186281847
9k6p4EceoX5ni4N7vI	PRPF3	pre-mRNA processing factor 3	0.0337067267942685	8.67377020540049	2.35716741032526	0.0212294806755774	0.250491952408038	-3.63824895828586
NA6IuyXip675eXVe58	PRKCDBP	protein kinase C delta binding protein	0.0647578367577984	6.53001590296111	2.35698650268863	0.0212390401579272	0.250491952408038	-3.63863366936115
6ezwApA2ClqZrh0Ze0	TDP1	tyrosyl-DNA phosphodiesterase 1	-0.0933833930441287	8.69586826789658	-2.35657788674132	0.0212606462513206	0.250555470019656	-3.63950252400362
WhIgghRh6IJVf3i5Ko	ANGPTL4	angiopoietin like 4	0.0632563672162238	5.08528340181859	2.35602269268041	0.0212900341888197	0.250555470019656	-3.64068284856447
NrO3oq4Iivry6sAMRI	KCNQ1OT1	KCNQ1 opposite strand/antisense transcript 1 (non-protein coding)	-0.0824831743904236	4.6379024565234	-2.35597220260737	0.0212927085583251	0.250555470019656	-3.64079017714255
o8b_qwUlwug36CgLCo	PTP4A1	protein tyrosine phosphatase type IVA, member 1	-0.0597980345506825	5.67225893959132	-2.35520142172925	0.0213335725798748	0.250846720486021	-3.6424284122102
EpIo5LopTSqX4wRIv0	RBM4	RNA binding motif protein 4	0.0450923246096615	7.41267203226062	2.35478541405889	0.0213556567846834	0.250913207559634	-3.64331241571099
Wggeq_8ieI4exExV5U	POLR3GL	RNA polymerase III subunit G like	0.0299952739060436	9.49075490112319	2.35448792944676	0.0213714615380315	0.250913207559634	-3.64394448027535
H6_FfqsxA7S3i67fHU	SNRK	SNF related kinase	-0.0432105525213778	7.17249482847376	-2.35335757116826	0.0214316101061337	0.250940965694158	-3.64634553210046
Wl5Ey4gj7k43uJ3FEU	LINC01184	long intergenic non-protein coding RNA 1184	0.0386953825439252	6.33755611565098	2.35335532064519	0.0214317300109075	0.250940965694158	-3.64635031157763
fr.cFeEaHuTH9XTU54	CEACAM1	carcinoembryonic antigen related cell adhesion molecule 1	-0.102293855961289	5.97165199280348	-2.35332314484323	0.0214334443586379	0.250940965694158	-3.6464186434959
Q_.EWO1eDNJeycOh_o	PLIN3	perilipin 3	0.0369078462656363	11.2121638498659	2.35321468627708	0.0214392240004785	0.250940965694158	-3.64664897168917
NhdSLgjq4cjjO7q6pY	ATP6V0B	ATPase H+ transporting V0 subunit b	-0.062236287873919	7.60751976121025	-2.35292963015135	0.0214544209493143	0.250940965694158	-3.64725428868215
l5UdpWg4dhSEjCjIqg	SNRPC	small nuclear ribonucleoprotein polypeptide C	0.0348063916258419	9.83982408898122	2.35259565563393	0.0214722380306677	0.250960812058134	-3.64796340492339
QXnojsD_U4fXooSSTo	ZWINT	ZW10 interacting kinetochore protein	0.0435968397355642	8.34118103731475	2.35191314253743	0.0215086901016666	0.251198265193358	-3.64941229560185
Te8eTniMa680aoAve0	ZBED9	zinc finger BED-type containing 9	0.077688859589351	4.46239353892748	2.34931286662428	0.0216480720043542	0.252072168571132	-3.65492909559518
iQCSjjBTNVUudNAsoQ	MND1	meiotic nuclear divisions 1	0.042462761756947	8.24753564970563	2.34906625575523	0.021661332630064	0.252072168571132	-3.6554520419277
lpcsVWbpc1HXRNREeQ	PDCD1	programmed cell death 1	-0.063558199845084	5.10471508633629	-2.34901289879929	0.0216642026615726	0.252072168571132	-3.6555651809588
cVziqdayRepF5Z6Cc8	NHP2	NHP2 ribonucleoprotein	0.0454040324306708	8.59865607333187	2.34877381379248	0.0216770670211578	0.252072168571132	-3.65607211428432
rIXh5evSXfZ4XYVHdA	ICA1	islet cell autoantigen 1	0.0485438895177417	6.06237744420215	2.3487144040649	0.0216802647120886	0.252072168571132	-3.65619807429111
ESkXp4u56LijfgSAfU	COIL	coilin	0.0335527779369755	8.34433527892607	2.34870691876432	0.0216806676333984	0.252072168571132	-3.65621394437117
TiKgqnigN3qsIsCn1I	NRN1	neuritin 1	0.0919581415106572	4.55463600659033	2.34827305715888	0.0217040330641335	0.252155512494351	-3.65713372976643
ZoF6LQAgefS1WexZeU	WIPI2	WD repeat domain, phosphoinositide interacting 2	-0.0547307635522839	5.75113850815667	-2.34747744690499	0.0217469384935633	0.252465576784335	-3.65882004708985
6R7R.SJ2unRJu15Vr8	GNA15	G protein subunit alpha 15	-0.0650643302704412	8.6447368331593	-2.34688960972638	0.0217786876235022	0.252645759256842	-3.6600656726526
9B3EjpMXuXn3qvoLuE	DIRC2	disrupted in renal carcinoma 2	0.0570089385803019	5.20887107711671	2.34535075443589	0.0218619965327401	0.253423352212731	-3.66332525094119
0rkBtARboKIAo6glYo	KIF26B	kinesin family member 26B	-0.0724569281687822	5.2522671369292	-2.34388607617196	0.0219415527241196	0.254156319054385	-3.66642602478716
WeB6vK5Z755274NyBY	UQCRH	ubiquinol-cytochrome c reductase hinge protein	-0.0228087696148365	12.527948903472	-2.34352817908925	0.0219610315164173	0.254192816838353	-3.66718345538516
f17oLp3qRSXuqcCH4Q	C1orf35	chromosome 1 open reading frame 35	0.0549061925962945	6.2162975163352	2.34074084742644	0.0221132606147939	0.25576466660558	-3.6730790291629
6vq9fQes64Eud_6yug	DUSP12	dual specificity phosphatase 12	0.037296134674437	9.22729891165006	2.33971670390871	0.0221694289450728	0.255859332005442	-3.6752437322843
QJ1JN4v6qziASqJIKI	YIPF2	Yip1 domain family member 2	-0.0680342045227306	4.83644240696903	-2.33960631945846	0.0221754904527227	0.255859332005442	-3.67547700077909
WX3QVN1cFUTn5S9_Co	N4BP2L2	NEDD4 binding protein 2 like 2	-0.0434135460425725	7.15253218931307	-2.33954142558682	0.0221790546373373	0.255859332005442	-3.67561413254504
rGyFAp0lRB37XFF0M4	MED27	mediator complex subunit 27	0.0398597847988769	7.29016894568381	2.33924600393303	0.0221952865981969	0.255859332005442	-3.67623836785145
TqCLahRL88UPeKC1l8	MAD2L1	MAD2 mitotic arrest deficient-like 1 (yeast)	0.039610195912928	10.1462903718473	2.3390944089863	0.0222036200886017	0.255859332005442	-3.67655866680183
0lOwqJTfoJI11JdS0I	CD96	CD96 molecule	0.0694134343859649	5.78752355099843	2.33877864162098	0.0222209874052757	0.25587006799211	-3.67722578258219
0Us8a5d93lV.VKs3uo	CLCF1	cardiotrophin-like cytokine factor 1	-0.056396446052107	5.31573981868569	-2.33811941245493	0.0222572841446138	0.25590239681935	-3.67861827729306
WVT1_MHd_38eoJ6ItE	COX11	COX11, cytochrome c oxidase copper chaperone	0.0603802623876121	5.25873927401476	2.33805526800828	0.0222608187072932	0.25590239681935	-3.67875375230229
rr3l9SziziUV5G1d7k	ACD	adrenocortical dysplasia homolog	0.0399934157108017	7.15130765435581	2.33783231235412	0.0222731081507078	0.25590239681935	-3.67922461684119
r6tEU_H4EunUCSrfbk	RAB9B	RAB9B, member RAS oncogene family	0.0835993580569316	4.33296039398079	2.33715858555058	0.0223102809884295	0.256140453117898	-3.6806472424497
6tAruqKfuJ97i__7uk	SLC25A26	solute carrier family 25 member 26	0.0571436415747449	5.78375755408248	2.33630370334279	0.0223575283855887	0.256493737587947	-3.6824518904837
WorgtrlH3lelVCNpVc	RPL12	ribosomal protein L12	0.0349747079299392	12.5624953874325	2.33544145937558	0.0224052726517613	0.256852197822253	-3.68427151133968
BelyAp7p876j446DeU	TMEM132B	transmembrane protein 132B	0.0697088877187053	4.69061987121836	2.33506605915379	0.0224260876322625	0.25688687893757	-3.68506355216498
xTpVKyqh73JSe6ETKA	PSMD8	proteasome 26S subunit, non-ATPase 8	0.065721629983759	8.36525940400636	2.33455363671776	0.0224545278632365	0.25688687893757	-3.68614451577376
iiipihinwAfdI0NuTU	TUBB2A	tubulin beta 2A class IIa	-0.0636343679741287	6.71893271353945	-2.33449470421787	0.0224578007601512	0.25688687893757	-3.68626882194084
rqrq.8Ddv3foQkSo3Y	PTP4A3	protein tyrosine phosphatase type IVA, member 3	-0.0747010588611435	5.28408353407324	-2.3333377781303	0.0225221380798352	0.257433660518998	-3.68870858342157
99xXCJZTR9KWev7SU0	LNPEP	leucyl and cystinyl aminopeptidase	0.0451248757710348	7.60516170204237	2.33256125949074	0.0225654124635533	0.257739061799411	-3.69034555383786
cekocNV9vnUUetOeOE	TMEM69	transmembrane protein 69	-0.0439668805191205	8.63729234939695	-2.3319040995105	0.0226020928036214	0.257903019372384	-3.69173054399694
3SCWEKb0JgBOFniVOI	ATRX	ATRX, chromatin remodeler	-0.0701257528169082	5.03240607903786	-2.33171066645941	0.0226128996302225	0.257903019372384	-3.69213814850715
lEoVOgSVWgiiziROi0	HARBI1	harbinger transposase derived 1	0.0604429715483006	4.8212471561082	2.33061107589561	0.0226744193798237	0.258108459561441	-3.69445467351318
QSoU59Pbp7tVN4qXrM	NICN1	nicolin 1	-0.0337822091261291	8.49632005452207	-2.33057491134289	0.0226764452307977	0.258108459561441	-3.69453084618551
oresIKQlkBELcLVjQo	PNISR	PNN interacting serine and arginine rich protein	-0.0488456855027529	8.9063490719106	-2.33049984345107	0.022680650865882	0.258108459561441	-3.69468895697508
oLUKIIIpcl4lAiIsak	PSMB8	proteasome subunit beta 8	-0.0328967989297665	10.0424817004193	-2.32913560597441	0.0227572022069756	0.25879044847202	-3.69756161079744
BUT5or3uEOUVNDcHBI	CDKL3	cyclin dependent kinase like 3	0.0605113294261068	5.5136944132258	2.32808685253379	0.0228162066494783	0.259272047532174	-3.69976898287727
o1JThVRV3lAsd8rlLc	IL10RA	interleukin 10 receptor subunit alpha	-0.044800875076425	6.0860919452267	-2.32698740605302	0.0228782089052266	0.259786984855264	-3.70208214427045
cgblN7AkdIKSU1cjvo	RASGRP3	RAS guanyl releasing protein 3	0.0308345189622501	10.4251280180652	2.32610273553677	0.0229282075887444	0.259995599576884	-3.7039427570815
Wg57u3taRVrKXj6v3I	AURKA	aurora kinase A	0.0399086149204855	9.37479473972644	2.32607137255866	0.0229299818999911	0.259995599576884	-3.70400870772771
TA8nq7jpR_op4jKINk	PDE7A	phosphodiesterase 7A	-0.0859755314486043	6.58161896102614	-2.32523857559827	0.0229771406745318	0.26017247140414	-3.70575965188731
xde7_T16j810Lk.eFM	CCDC50	coiled-coil domain containing 50	-0.0309077629185781	11.1021716863871	-2.32520568573307	0.0229790048934155	0.26017247140414	-3.70582879143371
x36AJeiCeqI5r0Q5do	IFFO1	intermediate filament family orphan 1	-0.0393674609776798	8.67021646317737	-2.32380573996182	0.0230584792603682	0.260882561864399	-3.70877092132613
rrgUgSRddUfKCduP1I	TPST2	tyrosylprotein sulfotransferase 2	-0.04356763615556	7.65858610705169	-2.32331446132705	0.0230864267042343	0.261009071119476	-3.70980303666167
EfGAvg_rimpA0XitJI	WSB1	WD repeat and SOCS box containing 1	-0.0728132357340601	10.3352108547727	-2.32279538332176	0.0231159882208795	0.261153631801635	-3.7108933533601
Zdex6UWWe0ftE_L07U	HIC2	hypermethylated in cancer 2	-0.0472960136262256	6.18870401667616	-2.32241054987017	0.0231379261751911	0.26121191783566	-3.71170155732658
uiXghHokgNPRt4_7mo	MARCH8	membrane associated ring-CH-type finger 8	-0.057359747134566	5.03701084956376	-2.32148460524498	0.0231907866053861	0.261330993177779	-3.71364570350275
HHIB6kTrIp0TqL7XRU	ERLEC1	endoplasmic reticulum lectin 1	-0.0492696278723728	8.89116942697014	-2.32142812336378	0.0231940145129969	0.261330993177779	-3.71376427352084
ZkrzZCO3yLKvCvdLhE	HNRNPH3	heterogeneous nuclear ribonucleoprotein H3	0.0339735568146022	8.94868262268146	2.32134382203762	0.0231988330274725	0.261330993177779	-3.71394123915479
EdV._eEEe7E_FH1xTE	SLC7A1	solute carrier family 7 member 1	0.0375127800750983	9.58724935900622	2.31978287904149	0.023288214337136	0.261885926897854	-3.71721698809025
91r.DPno.nF.rx_5Ls	AKAP11	A-kinase anchoring protein 11	-0.0352445189342363	8.70087687702295	-2.31951072435274	0.023303829442579	0.261885926897854	-3.71778793194441
3VKpUgXFYzoj6gYAoY	SDHAF4	succinate dehydrogenase complex assembly factor 4	-0.0447015057367173	6.59325292312742	-2.31950988787231	0.0233038774506615	0.261885926897854	-3.71778968667973
HfEV6SCoiA7v_q6sHA	KBTBD6	kelch repeat and BTB domain containing 6	0.0774911175607858	4.90350439326993	2.3190925662349	0.023327839712352	0.261885926897854	-3.71866506023296
6093tSS04FX0XUOF40	POLR2C	RNA polymerase II subunit C	0.0377258320957715	8.354888606723	2.31885429009647	0.0233415311276934	0.261885926897854	-3.719164807965
oKiggmYIlvLTlruumk	SNHG6	small nucleolar RNA host gene 6	0.036300963002722	10.5744287757333	2.31867828553316	0.0233516489758748	0.261885926897854	-3.71953392253673
Tl6TU74TfeHtV5_nok	PLEKHM2	pleckstrin homology and RUN domain containing M2	-0.0275632424621369	9.02754288150001	-2.31843136668401	0.0233658499782322	0.261885926897854	-3.72005171747094
Nf51Mil4nh6JItP59I	NUDT2	nudix hydrolase 2	0.041869768961003	6.9188478697146	2.31805458507985	0.0233875345146291	0.261939385652076	-3.72084174736372
KUnW793Cg8.REaFN.I	YWHAG	tyrosine 3-monooxygenase/tryptophan 5-monooxygenase activation protein gamma	-0.0428655306513337	9.5524275238154	-2.31776399665136	0.0234042706476129	0.261939385652076	-3.72145097407865
rnfjVj9ORJXksKJUgo	TPST1	tyrosylprotein sulfotransferase 1	-0.0412959876729921	6.03899982696354	-2.31743663323535	0.0234231375169522	0.261962216137868	-3.72213722270355
Elf03ih.Te5M0aVVKk	DHX38	DEAH-box helicase 38	0.0508339824056836	6.57991022633543	2.31665967286273	0.0234679699121956	0.262275201430769	-3.72376562656681
N6JU0XG5Z7U0jdf_0s	UGT8	UDP glycosyltransferase 8	-0.0625654750690439	4.60144801490574	-2.31615310317377	0.0234972411022805	0.262413952281423	-3.72482707778094
BffgXrpVb6BzS6bdU4	KIAA0513	KIAA0513	-0.0697435394980827	5.10403944837061	-2.31503769911794	0.0235618067851324	0.262946385685263	-3.72716356591484
fwp4eRXI4avjq5JAUU	PATE2	prostate and testis expressed 2	-0.0634533075935511	6.28051129636743	-2.31430573786789	0.0236042621255236	0.263186068760599	-3.72869631797866
0rUwFYu5f5.UV_chHo	SEMA6A	semaphorin 6A	-0.0932811522764966	6.38432328653837	-2.31407666084627	0.0236175630148551	0.263186068760599	-3.72917592834642
9Lqi6J561QUd6Szgvk	RASAL3	RAS protein activator like 3	0.038988011844396	10.4662529726001	2.31379371635969	0.02363400077899	0.263186068760599	-3.72976826328799
6cZKxJZZ9SFPhNiXhM	GPX1	glutathione peroxidase 1	-0.0379766310121953	11.114701667118	-2.31284981513499	0.0236889104351821	0.263608976165058	-3.73174384317963
uLCo2CE.QPnN1N6njU	ZNF281	zinc finger protein 281	-0.0541450787793674	7.49618607481266	-2.31083197294256	0.0238066739365887	0.264655296889214	-3.73596487234562
cb2.e.e.Eb6LqtdbqY	MIER2	MIER family member 2	0.0642292433401459	5.11914599679407	2.31065654244436	0.0238169367254489	0.264655296889214	-3.73633169884605
TYTHT_vwkoNcgkDo6o	SLC19A2	solute carrier family 19 member 2	0.0655533480083979	5.76392789793631	2.30984338990116	0.0238645578529353	0.264824487120119	-3.73803169706142
xsHVVKxjKh4M6FeeAk	IRS2	insulin receptor substrate 2	-0.0910583143295435	4.65192531981567	-2.30981564489426	0.0238661841874054	0.264824487120119	-3.73808969251153
Q4j5lHkdS3raQi4h1s	AIRE	autoimmune regulator	-0.0620132660319382	10.934305373167	-2.3094370822275	0.0238883842822858	0.264882027426371	-3.73888094359483
rFt916wAl66DgpKBP4	C4orf47	chromosome 4 open reading frame 47	0.0823549017723201	4.89722615799114	2.30879668242386	0.0239259809819654	0.26501974735107	-3.74021922078386
ERTupd1LkBRYk9RThY	C10orf99	chromosome 10 open reading frame 99	0.0943685246910011	5.85379330925327	2.30864572099462	0.0239348512831195	0.26501974735107	-3.74053464676057
oeDIfnA6RORxCKBf_o	ARHGAP12	Rho GTPase activating protein 12	-0.0866181861567729	4.77280871145925	-2.30608884525071	0.0240855332532091	0.266498636592721	-3.74587443368535
KrziRI9QJSPFyvaIVk	WDHD1	WD repeat and HMG-box DNA binding protein 1	0.0452930523547004	6.17847500484374	2.30539201747754	0.0241267441888132	0.266693778890636	-3.7473288161294
6oArujh3Hm6OvE.n9Y	RNGTT	RNA guanylyltransferase and 5'-phosphatase	-0.0319722293990341	10.066452612183	-2.30521147900883	0.0241374315555567	0.266693778890636	-3.74770556544153
N6vPXMHs7vi6W4pzoU	RFC1	replication factor C subunit 1	0.0343301756768305	8.82207267638357	2.30435519317395	0.0241881783816811	0.266919672516828	-3.74949212782296
3TXj7nnrbf3V0iS4SQ	VAMP5	vesicle associated membrane protein 5	-0.0410040723272301	8.59129240830962	-2.30418577993348	0.0241982296577539	0.266919672516828	-3.74984552604309
oJIY5OUzGAoAKkqr1U	MCAT	malonyl-CoA-acyl carrier protein transacylase	0.0822412170490612	4.72239017048164	2.30390203675218	0.0242150724074183	0.266919672516828	-3.75043736837045
WktiXqYRAiFFe3jIwc	MSL3	male-specific lethal 3 homolog (Drosophila)	0.0538440964829757	5.48568403029221	2.3037103280918	0.0242264579436201	0.266919672516828	-3.75083720640453
NrjYut7vXPnrquMq6k	DCAF8	DDB1 and CUL4 associated factor 8	-0.0407665824588402	8.131408753019	-2.30335533626449	0.024247553349662	0.266963161631922	-3.75157752178986
H57JujJ7j64tBbe6cU	ANP32B	acidic nuclear phosphoprotein 32 family member B	0.0263986714531994	12.6626113463658	2.30255992306628	0.0242948798835511	0.267189439781202	-3.75323595775012
3Una1dSkCiAah8fRKE	LANCL2	LanC like 2	0.047956208240915	5.47038698110226	2.30243313801686	0.0243024310592357	0.267189439781202	-3.75350025934293
WVQHCU.gEI93U_S.sk	GNA13	G protein subunit alpha 13	-0.0570551035807348	7.54971761856456	-2.30102908216457	0.024386194099599	0.267921150135891	-3.75642638478017
W4MESiDowpAGinqAOk	BCL2A1	BCL2 related protein A1	-0.0885586952138025	5.33012259629278	-2.29952833819598	0.0244760078726656	0.268718258506105	-3.75955232940514
9fVXRVUd8rOzjnDftU	SP1	Sp1 transcription factor	0.0365738342118336	7.0716398391694	2.29896809926401	0.0245096110103858	0.268768654534074	-3.76071882177522
uRT.npF.eCy77VrNJc	WDR33	WD repeat domain 33	-0.0314317408881035	10.1897127072446	-2.29887620867688	0.0245151265055489	0.268768654534074	-3.76091012710932
KXnsIfi6Xh6uvuKOQo	RNASEH2C	ribonuclease H2 subunit C	0.0547551087179123	5.14604172794447	2.29841383442705	0.024542896001589	0.268883747327753	-3.7618726365737
foSNvtJx_O1_VOUSfo	IFT46	intraflagellar transport 46	0.0552863059910913	5.86746710006777	2.29711407066281	0.0246211070398025	0.269550910264167	-3.76457742739775
0lzjRfk6EkNewE0SLo	KLHDC2	kelch domain containing 2	0.0329575876142991	8.3530818372727	2.29631596241594	0.0246692410599223	0.269888084905742	-3.76623763264535
B_01.ieeHlDBPfY3eo	JAK2	Janus kinase 2	-0.038413654622949	6.71002264517456	-2.29573098429762	0.0247045740420475	0.270084837560811	-3.76745417700273
lxqiu6ecnqK46oeXtM	TSTD1	thiosulfate sulfurtransferase like domain containing 1	0.0606901281906178	5.06915119564014	2.29501105953231	0.0247481193370417	0.270371032869519	-3.7689509986492
oJboSeK_q0OXXqRX5c	PICK1	protein interacting with PRKCA 1	0.0600579659259466	4.98529009777289	2.29375838674705	0.0248240502949604	0.2708391262262	-3.77155452032624
KoUnEQva6fQrBDCAkU	HCFC2	host cell factor C2	-0.0454714868310588	6.54214626314196	-2.29351567915127	0.0248387858682817	0.2708391262262	-3.77205881692607
0qtK6Sc9VFCI9KtEr8	DNAJB5	DnaJ heat shock protein family (Hsp40) member B5	-0.0648412954643703	5.55091057865159	-2.29333534671875	0.0248497394516913	0.2708391262262	-3.77243348121894
fSqi4B_noSNNdHS9Xo	ZSWIM8	zinc finger SWIM-type containing 8	-0.0357680761180558	8.06120764667674	-2.29315736515962	0.0248605544307065	0.2708391262262	-3.77280323659204
6epeZ6CTNW4Au8uXys	IFNLR1	interferon lambda receptor 1	-0.0475094434051148	6.84936976649635	-2.29245333108075	0.0249033756088341	0.271014937837781	-3.77426562193522
ERYgbff3Pjp6Nz.SlU	DHX29	DEAH-box helicase 29	0.0352780747782105	8.59230757368215	2.29231972478119	0.0249115092526892	0.271014937837781	-3.77454309913985
i39i0uQ023t93uL50k	TVP23C	trans-golgi network vesicle protein 23 homolog C (S. cerevisiae)	-0.0599624608693246	7.10110425927034	-2.29135054596182	0.0249705810141865	0.271265176974721	-3.77655550253776
E6u7ihOqeChXiifZBw	TMEM132A	transmembrane protein 132A	-0.0713599269427818	4.80144141235639	-2.29077738963893	0.0250055733517355	0.271265176974721	-3.77774526250175
r15YSrezLzSP97mOnU	SCARNA14	small Cajal body-specific RNA 14	0.099523340288199	5.24245762545137	2.29026985098787	0.0250365958013801	0.271265176974721	-3.77879860076196
ckV3VJDbOU_s.giD1Q	NAA25	N(alpha)-acetyltransferase 25, NatB auxiliary subunit	-0.0450060548685778	7.05867228487306	-2.29021431265857	0.025039992554148	0.271265176974721	-3.7789138520893
WqenuuGedD9eu59oXw	FFAR2	free fatty acid receptor 2	-0.133370155471735	4.37062056609108	-2.29014821728853	0.025044035512132	0.271265176974721	-3.77905100793065
NaBUChVuXQ3c147TqI	OSGEP	O-sialoglycoprotein endopeptidase	0.0326777177181537	7.50295877269768	2.28976129447399	0.025067714604641	0.271265176974721	-3.77985385144497
3cCSMOyguT6hSPpOCk	PYROXD1	pyridine nucleotide-disulphide oxidoreductase domain 1	0.0529808186269345	5.84870962962078	2.28956959713096	0.0250794535265295	0.271265176974721	-3.78025156992423
90TCtf5.3_7wiofl3s	RCBTB2	RCC1 and BTB domain containing protein 2	0.0624870444097766	8.5911986978348	2.28944158061121	0.0250872955491114	0.271265176974721	-3.78051715262412
ciuyoP_Xl9eSF4np.o	FLNB	filamin B	-0.0624916141638742	6.82771387482848	-2.28929645413246	0.0250961883144996	0.271265176974721	-3.78081821624758
iV1CkkCSDaiS6JIDuQ	MRPL9	mitochondrial ribosomal protein L9	0.0377079322723981	7.36136557035033	2.28907972189856	0.0251094739822647	0.271265176974721	-3.78126779502444
6nRExABwvl.X4OBXt4	ABHD17B	abhydrolase domain containing 17B	-0.0567214484973413	6.74750428469166	-2.288807320922	0.025126180960788	0.271265176974721	-3.78183279873535
NkI6tAtIuutOteiukI	PSMC1	proteasome 26S subunit, ATPase 1	0.0314146365150187	10.9668405313705	2.28837693964364	0.0251525972709716	0.271362185942124	-3.78272536203765
uajSsorSRCMGrTAgXk	ANKLE1	ankyrin repeat and LEM domain containing 1	0.0586446839618915	5.41770513572121	2.287442130206	0.0252100594261192	0.271793770876609	-3.78466355947608
KTRdHVIgL60ndUnR0k	LRRC8D	leucine rich repeat containing 8 family member D	0.0483944793682447	6.48415155577667	2.28545057846729	0.0253328660891318	0.272625682663593	-3.78879050768322
BsgTKHnDdL2d7jtC5I	RAPGEF2	Rap guanine nucleotide exchange factor 2	-0.0434343431965885	9.00210657899834	-2.28539972213031	0.0253360089978509	0.272625682663593	-3.78889585333881
9pXn7lO6O.uJdrXEkc	PDXK	pyridoxal (pyridoxine, vitamin B6) kinase	0.0327799475207336	8.99401835459756	2.28533905503703	0.0253397586597006	0.272625682663593	-3.78902151872813
KkXuZcB54_l0H5UpoY	ACOX3	acyl-CoA oxidase 3, pristanoyl	-0.043598049260463	7.35246399479866	-2.28406497108742	0.0254186196157001	0.273172252073526	-3.79165998821962
EHoFRIXRF6qEikjCCs	FANCA	Fanconi anemia complementation group A	0.0860025274269931	4.50662130606452	2.28395148061503	0.0254256547568435	0.273172252073526	-3.79189495184904
oSAVxirgATpAl.BCV0	ZNF714	zinc finger protein 714	-0.0825227754291932	4.48403905726342	-2.28355944730077	0.0254499696850194	0.273244915900953	-3.79270651647129
lve7X3HUk23TsAwgJU	DLAT	dihydrolipoamide S-acetyltransferase	-0.0360095955700993	8.03102582329934	-2.28269051427374	0.0255039364548157	0.273635618696465	-3.79450490646922
ruiqTsoSq9w8e3uIvE	CA13	carbonic anhydrase 13	-0.071103513914363	4.79382958041841	-2.28216060190861	0.0255368973164799	0.273800562963471	-3.7956013538954
onv2v9enXaV.3Ve_Sc	SNRPB2	small nuclear ribonucleoprotein polypeptide B2	0.0445891370102329	9.12485214603152	2.28133645970949	0.0255882342566989	0.274162168553537	-3.79730616276162
EtEd1CJElNN1RrFEpc	FAM86B1	family with sequence similarity 86 member B1	0.0706298350523441	4.6588970714282	2.28085583969719	0.0256182148164896	0.274294613661011	-3.79830012331773
379F6RUO6MV0sIdKiU	SREK1IP1	SREK1 interacting protein 1	0.063581051215909	4.67437775014259	2.28007674105278	0.0256668800989155	0.274557930175885	-3.79991098085905
rm44T3Wg2expfjgJE8	SNORD68	small nucleolar RNA, C/D box 68	0.0581714800245991	8.09947383866531	2.27987740190236	0.02567934465055	0.274557930175885	-3.80032305708817
E6HW0QzrKM1dFB1YR0	HIBADH	3-hydroxyisobutyrate dehydrogenase	-0.0322598530634515	8.60487333968818	-2.2792616315429	0.0257178821701984	0.274557930175885	-3.80159579008491
9.v6uv7iX55QteX_rY	CASP2	caspase 2	0.025826444065591	10.7817373338133	2.27923618919856	0.0257194755586827	0.274557930175885	-3.80164837042336
iu7mpOjuHqJ3nqRUTc	LLGL1	LLGL1, scribble cell polarity complex component	-0.052312845903327	6.1865955941684	-2.27905240736994	0.0257309879320797	0.274557930175885	-3.80202816762551
BRae6X9K7KSup3n1Y8	DHCR7	7-dehydrocholesterol reductase	-0.0359471813275526	8.1197809515686	-2.27868317756822	0.0257541308118086	0.274616649642627	-3.80279112600366
rfGuCvcKTqNv1I4g1E	TMEM70	transmembrane protein 70	-0.0602634128300003	5.16448246854254	-2.27833821205559	0.0257757694504118	0.274659259961677	-3.80350385024739
W9EVl6.fgu56tfV3nU	UBE2L3	ubiquitin conjugating enzyme E2 L3	0.0476020253856522	6.98742562315168	2.27679021692277	0.025873068365001	0.274884425846223	-3.80670098543127
6e5f00T1yVHdNPHkgo	ZNHIT6	zinc finger HIT-type containing 6	0.0282289000830817	8.93739649624562	2.27615556570557	0.0259130529198689	0.274884425846223	-3.80801121787603
6DE0YpSe7j94hcjiLU	GAPVD1	GTPase activating protein and VPS9 domains 1	-0.0282792273920897	8.34963127463365	-2.27581061336029	0.0259348086359535	0.274884425846223	-3.80872323809856
6oXiEe6e3DsNfwA93k	ATP11B	ATPase phospholipid transporting 11B (putative)	-0.0532988143864533	7.2176938106919	-2.27567156851683	0.0259435825827586	0.274884425846223	-3.80901021608018
6Csp6SMb20n51.eVug	HNRNPA1	heterogeneous nuclear ribonucleoprotein A1	0.0623223935931965	7.74106847023405	2.2754667143266	0.025956513978881	0.274884425846223	-3.80943299219638
9Vyi_DX3V5cXkk3X9U	RBM4B	RNA binding motif protein 4B	0.0364274479297683	7.39059873888946	2.27542365121708	0.0259592330565395	0.274884425846223	-3.80952186128435
BddMriNCKUUvsfSRQ4	ASCL1	achaete-scute family bHLH transcription factor 1	0.0587979596695739	7.21366694916009	2.27532865041945	0.02596523245749	0.274884425846223	-3.80971790878374
ce6_EpnldjutOCg6TE	ZNRD1	zinc ribbon domain containing 1	0.0346502775369041	8.57769436694365	2.27526956573665	0.0259689643353968	0.274884425846223	-3.80983983479688
lSy3hs.Vfe1XLCVL54	BUB3	BUB3, mitotic checkpoint protein	0.0281849148002718	11.8182290160087	2.27521458941302	0.0259724371485878	0.274884425846223	-3.80995328044441
W6E3_opbz3lRZFdb00	TNFAIP2	TNF alpha induced protein 2	-0.0865308188278642	5.00053494328286	-2.27519823050653	0.0259734706076435	0.274884425846223	-3.80998703719106
3ep7rP6uN.E99IdO7s	IRAK3	interleukin 1 receptor associated kinase 3	0.0446748184768914	6.75496891948584	2.27436926377295	0.0260258874022412	0.275252048286747	-3.81169734519322
fiPPV6QOQvd6TUQxpE	LXN	latexin	0.0325451059053127	8.31558975038873	2.27237306382293	0.026152493601504	0.276403272497091	-3.81581367569848
KSffqL56n0u3e6.RSc	PCMTD2	protein-L-isoaspartate (D-aspartate) O-methyltransferase domain containing 2	0.0424989208843329	6.99540333214421	2.27172606102965	0.026193645388882	0.276560251419256	-3.81714718498174
WhKIH.9TObkx3ew9S4	ATXN1	ataxin 1	-0.0489624542916711	6.4932283290738	-2.2715810601262	0.0262028758249873	0.276560251419256	-3.8174459954089
9niJ6n9d7hTVpewTN4	GAS6	growth arrest specific 6	-0.0767379599254437	4.60187766776661	-2.27111834391998	0.0262323505208106	0.2766126504475	-3.81839942797391
f7CVXir4tLe37_e5Rk	ZC3HAV1	zinc finger CCCH-type containing, antiviral 1	0.0303069857087772	9.46847399723396	2.27094536832018	0.0262433764588231	0.2766126504475	-3.81875580364403
iF6gV0rdyuKt_OKEgs	NOLC1	nucleolar and coiled-body phosphoprotein 1	0.0345663038240554	7.46709190178739	2.27031020017198	0.0262838989189857	0.276789482099194	-3.82006421921505
uuVrlN9TNaudDAfuXU	GALK1	galactokinase 1	0.0388348416755042	9.54444150824773	2.26986421667793	0.0263123847755971	0.276789482099194	-3.82098273617315
WV_l5R.UrtfzR.hqHc	SH3PXD2A	SH3 and PX domains 2A	-0.0376519100096541	7.63651522628042	-2.26945169326078	0.0263387577296486	0.276789482099194	-3.82183220339611
BqejF0EIeIl.VZ93UI	SLCO5A1	solute carrier organic anion transporter family member 5A1	0.0503326940731384	6.28343878084761	2.269395655285	0.0263423420821134	0.276789482099194	-3.82194758645348
fW1rQwDWXh15lVk5gA	NPW	neuropeptide W	0.0724288434709663	4.70314701015181	2.26929079930825	0.0263490501330296	0.276789482099194	-3.82216347997031
lhC1QjlICkt1QoVFOQ	PPM1F	protein phosphatase, Mg2+/Mn2+ dependent 1F	-0.037524795437295	7.48256662910303	-2.26865505456804	0.0263897535298349	0.276904831743688	-3.82347226540218
6X_RJNfoqj2Qukle_M	PARP9	poly(ADP-ribose) polymerase family member 9	-0.034855098776828	9.3381210962677	-2.26845895521659	0.0264023199364984	0.276904831743688	-3.8238759048492
BkiUXXMhlT5XnnsR9I	PRELID3B	PRELI domain containing 3B	-0.0420958077233984	8.80102561413139	-2.26828625495452	0.0264133912602375	0.276904831743688	-3.82423135621379
frqaqaKOoHpy4keAzA	ASPHD1	aspartate beta-hydroxylase domain containing 1	0.0824803583624354	4.74950669770616	2.26736042739748	0.026472813331381	0.277331640559001	-3.8261364973312
fhAXzoAquFyyLsOqCo	CDC42	cell division cycle 42	-0.0751935594142048	4.5634561617385	-2.26709715924176	0.0264897321114616	0.277331640559001	-3.82667812117368
oEu0XR0lHV3RSEXfl0	CLNK	cytokine dependent hematopoietic cell linker	-0.0655142546041691	5.19727418877253	-2.26678331835841	0.0265099133873944	0.277356405655213	-3.82732371828286
9SIoX_50f6VKKS4504	KIAA0141	KIAA0141	0.0384341018682872	7.33613728043288	2.26544010032694	0.0265964412926618	0.277507607559415	-3.83008596505331
ins4gohXksfUhXQpbo	RABGGTA	Rab geranylgeranyltransferase alpha subunit	-0.0542821493840238	5.32353592169603	-2.26539491425405	0.0265993564332943	0.277507607559415	-3.83017886307833
HBFFlFF1RNXivph7cQ	ATP13A2	ATPase 13A2	0.073216345233903	5.02310905637395	2.26538728594083	0.0265998485951765	0.277507607559415	-3.83019454596697
Tkie_jd7tejvh5fg.U	CCNE1	cyclin E1	0.0602126756777364	7.02559263773973	2.26499089205734	0.0266254341109921	0.277507607559415	-3.83100942150323
x9av65pf7d2eS0idSs	ZNF626	zinc finger protein 626	0.0483664640349268	5.75944355737202	2.26464888403777	0.0266475267015667	0.277507607559415	-3.83171239657703
BI90n1UokIXeJWUJmk	MCM7	minichromosome maintenance complex component 7	0.0562526176056612	6.58555510426346	2.26459132269441	0.0266512465643627	0.277507607559415	-3.83183070119731
Enk_d54ns_AU4epUe0	FAM50B	family with sequence similarity 50 member B	0.0519266937295611	6.09681337184587	2.26420974814578	0.0266759171484259	0.277507607559415	-3.83261487815229
B2oL_Xpy4CtB7I54J4	MSH6	mutS homolog 6	0.0307103394126533	10.2801563017403	2.26411047599438	0.0266823388606213	0.277507607559415	-3.83281887458195
TAnl9SnfoR5fqJNeSc	MED19	mediator complex subunit 19	0.0400613291515409	7.32440748915506	2.26407251257172	0.0266847949972023	0.277507607559415	-3.83289688438936
Kz54_x6__fvh7HPSOk	SPIN4	spindlin family member 4	0.0466478683914828	7.36185296398995	2.26308394638662	0.0267488229729211	0.277987767718582	-3.8349278620847
Hx_d9eadxWudFCmlFI	PXMP2	peroxisomal membrane protein 2	0.0490657634556012	6.56062789333315	2.26259931854059	0.0267802610836063	0.278128822247887	-3.83592323665489
xrxZO2euCKK.lEqOxc	FCHO1	FCH domain only 1	-0.0403515365567992	5.45894622623975	-2.26228715257151	0.0268005287406458	0.278153754289582	-3.83656429586594
uk9YN7ipUASD8qurgI	RSF1	remodeling and spacing factor 1	-0.0667719626357257	6.0451658885342	-2.26170074496808	0.026838638368754	0.278363705612766	-3.83776832832688
iuBoeRv7xCogjzop5M	ZNF16	zinc finger protein 16	0.0458802256977812	5.99315139601384	2.26137805618482	0.0268596297440838	0.278395949304858	-3.83843076993355
r1_rN5CBdV.5dVQMI0	RBMXP3	RNA binding motif protein, X-linked pseudogene 3	0.0417372719636462	7.28256106444724	2.2606611376132	0.0269063181760065	0.278642305871982	-3.83990222809781
HroI6OXguyHnnJ4MU0	EPB41L4A-AS1	EPB41L4A antisense RNA 1	0.0393443886856102	9.86795579853626	2.2604636018788	0.0269191950174372	0.278642305871982	-3.84030759511136
36UASnSlAhdUJ7Ox9Q	DSCR3	DSCR3 arrestin fold containing	-0.0305341504898337	8.38379646597279	-2.25995597655597	0.0269523107274801	0.278799716548445	-3.84134916373974
rn6sR93wuty0KBdC04	ING1	inhibitor of growth family member 1	0.0392807150066041	6.86079466122549	2.25963628347422	0.0269731848260697	0.278830372757141	-3.84200502147459
l7qQTS1ReRQwon2JQs	RBM4	RNA binding motif protein 4	0.0379625144045425	8.85124696552782	2.25860433837546	0.0270406621590967	0.279278387683316	-3.84412153735563
lmknhIDM663d5KovUk	OSCP1	organic solute carrier partner 1	-0.0994497042276377	4.33919661960615	-2.25842501645141	0.0270524029179368	0.279278387683316	-3.84448924139663
rportThdVKEiQAfdXQ	DYRK4	dual specificity tyrosine phosphorylation regulated kinase 4	0.0341696591888896	8.17959951898417	2.25669510206299	0.0271658967936587	0.280264202308601	-3.84803518675907
HcyOLSdRH4t3.yKgNI	FAM103A1	family with sequence similarity 103 member A1	-0.0339691310877441	8.01683751037418	-2.25615424887429	0.0272014663950246	0.280289956152459	-3.84914333865548
NeS4lCNmk_R9JepjIk	FKTN	fukutin	-0.0484190373545043	11.8300271040949	-2.25585621313484	0.0272210844726833	0.280289956152459	-3.84975388542085
x5XtxFIQRKJ6tI9V0k	PAPSS2	3'-phosphoadenosine 5'-phosphosulfate synthase 2	0.0713739768108577	4.80989416408096	2.25544637630045	0.027248082179953	0.280289956152459	-3.85059335135508
9XRKqfeMV0BOiBLCok	SERP1	stress associated endoplasmic reticulum protein 1	-0.0430853801800837	8.58968121259736	-2.2552819345419	0.0272589212966341	0.280289956152459	-3.85093013945163
KKAfnSrjDEvKLtKlTo	SMC2	structural maintenance of chromosomes 2	0.032152811642204	8.33407462964172	2.25502148565038	0.0272760964649516	0.280289956152459	-3.85146351365722
NeSeol5.eUt_K94I0k	STK38	serine/threonine kinase 38	-0.0357819269925342	7.40310295415302	-2.25481905904517	0.0272894519711279	0.280289956152459	-3.85187802728886
fIAk8VP_aUL1YYinoU	DENND1A	DENN domain containing 1A	-0.0416389628377521	8.05873534891542	-2.25467924194184	0.0272986800538428	0.280289956152459	-3.85216431534255
6VH6yAiVIJJXpXsI6E	ITPKB	inositol-trisphosphate 3-kinase B	-0.0427326791147951	6.27741621414339	-2.25446064930262	0.0273131129206786	0.280289956152459	-3.85261187282237
oWp20SO0BV03.p5Mg4	TBC1D31	TBC1 domain family member 31	0.0324547930368319	7.70800227772871	2.25398747506788	0.0273443779129123	0.280289956152459	-3.85358054574082
isZZU7l7ogiK9e6pIQ	RPL23AP82	ribosomal protein L23a pseudogene 82	0.0519974412812965	4.97233385882737	2.25392610168746	0.0273484354699117	0.280289956152459	-3.85370617531694
EQpSihSq5ISBEx6BEo	FCRL5	Fc receptor like 5	-0.0661021557867076	5.42176814484408	-2.25285301707374	0.0274194657485081	0.280833054455772	-3.85590227447562
Ewd5xOneHnuqj4Agzk	TDRD7	tudor domain containing 7	-0.0337479453095446	8.36828499049808	-2.25204335857313	0.0274731667330171	0.281198066863649	-3.85755866982698
oqKeSejSKADUu4SLkI	SMUG1	single-strand-selective monofunctional uracil-DNA glycosylase 1	-0.0320000248112731	8.75075503416127	-2.25114259686725	0.0275330190771845	0.281453622262848	-3.8594008426607
HSlJIuC5enU9QHXoLo	MLH1	mutL homolog 1	0.0362889759993213	9.03075841077291	2.25112344991975	0.0275342925684942	0.281453622262848	-3.85943999374429
H6CoeSIgS2JLihHjnk	PDE7A	phosphodiesterase 7A	-0.0502671506066472	6.76693190639907	-2.25055609965049	0.0275720514225805	0.281635724031565	-3.86059996412477
ijOuV7s1SI5yAHvf50	WDFY1	WD repeat and FYVE domain containing 1	-0.0338735000600534	9.98656872548512	-2.25031233429363	0.0275882887428146	0.281635724031565	-3.86109827502371
0hVSs_3.hNSS1Cs_IQ	XBP1	X-box binding protein 1	-0.0445570841338495	11.6238912153458	-2.24928476005089	0.0276568285794924	0.28215039798528	-3.86319835674609
9yihU7I9kjpejqKCpI	SPR	sepiapterin reductase (7,8-dihydrobiopterin:NADP+ oxidoreductase)	0.0649433149074535	5.40126412486369	2.24876619145983	0.0276914743486776	0.282318842606557	-3.86425785670258
KaC6C631Cn._Weu0os	ZNF585A	zinc finger protein 585A	0.0430828226965636	7.11786086968029	2.24780709590121	0.0277556526604681	0.282787958519743	-3.86621685468173
EBp7SeefqtCoRl94G0	JUNB	JunB proto-oncogene, AP-1 transcription factor subunit	-0.0543047963077642	6.26615078709012	-2.24728692280904	0.0277905150508229	0.282957971426561	-3.86727903238478
oFd5WX6reep7gogwIs	IFT122	intraflagellar transport 122	0.0569384213455885	6.24872838222108	2.24614760325109	0.0278670078903704	0.283377404642004	-3.8696047501599
cuD4rkLe7P6kenugAk	CDKN2AIP	CDKN2A interacting protein	0.0419453324703533	7.26149392428381	2.24613114114863	0.0278681144981313	0.283377404642004	-3.86963834717726
Wk117s6CISuFnUr6uc	ABLIM1	actin binding LIM protein 1	0.05140583212179	6.44055102951591	2.24574421039927	0.027894135724435	0.283456857022196	-3.87042796172397
0pxR6i0o04vTffX3x4	SRI	sorcin	-0.0547488243247534	6.78838340225142	-2.24461510719608	0.0279701906736634	0.284044310768161	-3.87273146851906
KU6Ur5couq1HjgCK78	P3H2	prolyl 3-hydroxylase 2	0.0453447376928522	7.98608651089976	2.24424695852976	0.0279950281452956	0.284111211320706	-3.87348232089949
6H7A4Pgm0oUVl6UbmY	CHAF1A	chromatin assembly factor 1 subunit A	0.0523267387643876	6.22020107730014	2.24337344080861	0.0280540385101069	0.284524606856902	-3.87526346778831
o1yHgL.6AI5Kt4tKX0	TRAPPC11	trafficking protein particle complex 11	-0.0296268126382487	8.41498184203181	-2.24203199296426	0.0281448730787499	0.285090793985386	-3.8779975868212
ih616tFeUR_.XLv3uk	AP5M1	adaptor related protein complex 5 mu 1 subunit	0.0401771113521557	7.65050396205542	2.24200815441835	0.0281464896168768	0.285090793985386	-3.87804616147062
oqKOe8coi.4jHkujuo	RANBP6	RAN binding protein 6	-0.040849880671582	6.81990044980809	-2.24020990850823	0.0282686680655341	0.286089481108115	-3.8817090791486
lF4pXwX93S52X1VINU	ZNF134	zinc finger protein 134	0.0575872221785899	5.1287937952103	2.24001642540261	0.028281841689709	0.286089481108115	-3.88210304181714
TAeJTnFJNUq3UlxI4k	BTN2A2	butyrophilin subfamily 2 member A2	-0.0405579218493644	5.9899646910198	-2.23963648668403	0.0283077261845731	0.286165377429502	-3.8828765728603
NpQtUVN7qwQqrvrvf8	FAM86C2P	family with sequence similarity 86, member A pseudogene	0.0640127671859733	5.94652729324098	2.23929903575969	0.0283307335501463	0.286212108960855	-3.88356350679302
KqToeLnnN_A7kSsR8U	SLC12A2	solute carrier family 12 member 2	0.0633610723479987	7.57958772066335	2.23826978130731	0.0284010096902922	0.286598612888328	-3.88565816444773
xKf56fuaTXnW3kr7n0	ATP5I	ATP synthase, H+ transporting, mitochondrial Fo complex subunit E	0.0337728870849014	8.46602904780616	2.23819954943255	0.0284058106170793	0.286598612888328	-3.88580106462906
fXKXTDPCh19LqX0H3o	TIGD7	tigger transposable element derived 7	0.0499660456778184	5.73564167868247	2.23767890109697	0.0284414234952805	0.286742173039986	-3.88686030290359
3uLhXmFR3_hSSaODAk	ATP5I	ATP synthase, H+ transporting, mitochondrial Fo complex subunit E	-0.022073260691288	11.7989194227757	-2.23741579789681	0.0284594349633752	0.286742173039986	-3.88739549520432
TaAh71ABLow.7pfJxI	PPIB	peptidylprolyl isomerase B	-0.073836649511365	5.51657101890716	-2.23718423658357	0.0284752954470592	0.286742173039986	-3.88786648165247
Th6f_qxCrhyBfXqHek	ZNF142	zinc finger protein 142	0.0364739734987867	8.46616360496049	2.23599207736725	0.0285570739707705	0.286958818557857	-3.89029062171788
BpV1UnUdXF0IO4U.oA	STAG3	stromal antigen 3	-0.0742310907505124	8.31010388469915	-2.23596052039344	0.0285592414885343	0.286958818557857	-3.8903547746507
ooqEhJ31.aJenLcoTQ	POFUT2	protein O-fucosyltransferase 2	0.0464491203132279	7.04303617823822	2.23593486946727	0.028561003451011	0.286958818557857	-3.89040692046262
olE7204_J7gt9_he_0	APTX	aprataxin	0.0353329556049413	8.87014193233655	2.23579605713696	0.0285705401313385	0.286958818557857	-3.89068910335365
EX5f9J_FeQzBORKXn4	ZNF274	zinc finger protein 274	0.0365090219384063	8.18283844698845	2.23519326167385	0.0286119858745563	0.287189810506185	-3.8919143135396
iuVmMp93r.t.nvXpJk	C22orf29	chromosome 22 open reading frame 29	0.0492365524374018	5.57991645512428	2.23437379265001	0.0286684140339344	0.287303960031217	-3.89357946677384
BUXj1aEhdVB1m4hIg8	CCDC106	coiled-coil domain containing 106	-0.0311443706242821	9.79396148148789	-2.23406175169667	0.0286899267165197	0.287303960031217	-3.89421339280295
6CCWCiUSWgSUSULELk	DDX24	DEAD-box helicase 24	0.0277936967725583	9.60262209834595	2.23383220214611	0.0287057613535649	0.287303960031217	-3.89467968495701
c3cgRNSu2icK70nae4	CABLES2	Cdk5 and Abl enzyme substrate 2	0.0529466108443016	5.83831019651613	2.23345031298625	0.0287321216167449	0.287303960031217	-3.89545533855322
6SuD9VJeP9SOHEP6iE	YBEY	ybeY metallopeptidase (putative)	0.0471366434304239	6.94994422002296	2.23337145040436	0.0287375678335105	0.287303960031217	-3.89561550181215
cqbI.gxK4lDrJJI5KI	CCT6B	chaperonin containing TCP1 subunit 6B	0.0474034123959331	6.03967415363866	2.23326719322901	0.0287447691840314	0.287303960031217	-3.89582723187566
WJene55q53r6WHmO4s	RNH1	ribonuclease/angiogenin inhibitor 1	0.0460816731587137	7.01483741060443	2.23315469230928	0.0287525417348815	0.287303960031217	-3.89605569415045
BSXeHuXs3VA91HY9R4	TPX2	TPX2, microtubule nucleation factor	0.0427735884916926	8.19176822565783	2.23187982940398	0.0288407497115924	0.288000507703702	-3.89864394110416
KGU6HkmENDo657c5Eo	PI4KA	phosphatidylinositol 4-kinase alpha	-0.0301360846755716	9.88061481110145	-2.23078857004838	0.0289164430972884	0.288121829772999	-3.90085842196599
BTrREwL5LygKjqSoAE	ZBTB44	zinc finger and BTB domain containing 44	-0.0530038939570603	5.5224232389926	-2.23069010271422	0.0289232817055339	0.288121829772999	-3.90105819477896
l5R4X.i7p.gSgf0FJI	HSD17B7P2	hydroxysteroid 17-beta dehydrogenase 7 pseudogene 2	0.0527729364195213	5.80599184129463	2.23063877366598	0.0289268470988996	0.288121829772999	-3.90116232933134
BYvriEWaS2H6COd66w	DUSP10	dual specificity phosphatase 10	-0.0689109338659425	4.5508715862182	-2.23063760457357	0.0289269283103287	0.288121829772999	-3.90116470112048
68hekn_rifI.9F9LvE	SUGT1	SGT1 homolog, MIS12 kinetochore complex assembly cochaperone	0.0395924490281046	7.49978833642197	2.22937278542947	0.0290149069695281	0.288198432380898	-3.90373006799281
B_5R5EdQ3q4CFiHWXQ	CD96	CD96 molecule	0.101158688614862	5.85039294835329	2.22929960086905	0.0290200047558331	0.288198432380898	-3.90387846606294
Q35dRFdd1KFejg1ve4	RRP7A	ribosomal RNA processing 7 homolog A	-0.0381970995412646	9.4804554521224	-2.229145480499	0.029030742829644	0.288198432380898	-3.90419096586779
uF.95Uuyuz3wPSEqgg	FAM72A	family with sequence similarity 72 member A	0.0506581344036448	5.81078008894422	2.22864432374309	0.0290656842262685	0.288198432380898	-3.90520699999037
EpglSiFFii.DYiO96I	CCNDBP1	cyclin D1 binding protein 1	-0.0563470811349148	5.28642775133758	-2.22849402131314	0.0290761707413024	0.288198432380898	-3.9055116814404
E3u67.sWkajOgYAef4	ACKR3	atypical chemokine receptor 3	0.0698000605697956	7.66897363458303	2.2284548739152	0.0290789025789633	0.288198432380898	-3.90559103510826
3Xvv55T6TgOlB7p7xI	TIPARP	TCDD inducible poly(ADP-ribose) polymerase	0.0383439272377973	9.05992619780924	2.22816933739114	0.0290988351089138	0.288198432380898	-3.90616979510984
Trg5RNfpqvOhd_TtMk	PHKB	phosphorylase kinase regulatory subunit beta	-0.0311708793173483	8.21730884861675	-2.22796154025119	0.0291133484144725	0.288198432380898	-3.90659094333622
uomp54icBUkP9zj.9I	RPL5	ribosomal protein L5	-0.0281710071627572	12.4569388690689	-2.22790426517796	0.0291173498318723	0.288198432380898	-3.906707018365
oMgrqBSve4pPcXRSQk	TTC14	tetratricopeptide repeat domain 14	-0.0481376271760573	6.285770511352	-2.22787003628376	0.0291197414012816	0.288198432380898	-3.90677638623034
opLIq5393IogH5SiEI	ZUFSP	zinc finger with UFM1 specific peptidase domain	-0.0340561571699491	8.05568149242786	-2.22737677879778	0.0291542244333807	0.288337364271487	-3.90777591393404
Nd91eTR709EOAryggk	SDHAF3	succinate dehydrogenase complex assembly factor 3	0.0340341370752529	9.21631502490294	2.22695075481244	0.0291840361402633	0.288337364271487	-3.90863904741614
ZdFXIb5QUgeG7hders	RRBP1	ribosome binding protein 1	-0.0363019369301701	9.3876452381154	-2.22687496254606	0.0291893426318001	0.288337364271487	-3.90879258921902
BU6gOUeyttjF3p4KPk	TMPO	thymopoietin	0.0464537746684949	7.19017620915196	2.22527544639941	0.0293015285655419	0.289262014399718	-3.91203187700924
Zpx2op4pJINH4BaCkg	TMEM106A	transmembrane protein 106A	-0.0877910051746978	6.53026089654626	-2.22360858812232	0.0294188407811157	0.290236066717623	-3.91540540873516
9pf09n02ULseIUV6EU	FICD	FIC domain containing	-0.067893958045362	5.82420236196227	-2.22303524293911	0.0294592876761267	0.290451038975263	-3.91656529040913
3ded.cTh6l1fqegg_o	TGM2	transglutaminase 2	-0.0565364407175028	5.56134492063734	-2.22230258808654	0.0295110442586183	0.290715813107413	-3.91804708135392
N5pXmTsxye7ogB4fYo	UQCC1	ubiquinol-cytochrome c reductase complex assembly factor 1	0.050117309492307	6.16999570333482	2.22196930185785	0.0295346148651915	0.290715813107413	-3.91872101176472
01STVdFQEdfXpc3aHg	ZNF827	zinc finger protein 827	-0.0459101121236265	7.82819889295376	-2.22186260067127	0.0295421644614547	0.290715813107413	-3.91893675135547
9ksi378Ok.R709X8UU	SP4	Sp4 transcription factor	0.0363117040171423	7.28680699800088	2.2214983935475	0.0295679465520363	0.290785718207265	-3.91967307601014
BLnCuEdRQUi4ipIyko	ZBTB43	zinc finger and BTB domain containing 43	-0.0691998799498525	6.32600709998685	-2.22053184689444	0.0296364639122436	0.291212749983332	-3.92162665745276
ZgEpErjk9157590ud0	GHITM	growth hormone inducible transmembrane protein	-0.0325700689134841	11.4740646129533	-2.22022349010086	0.0296583522940093	0.291212749983332	-3.92224975305364
fIGoE0SVKpQk9JS5EI	RASSF4	Ras association domain family member 4	-0.0741161947689265	4.40113402141637	-2.22009487689428	0.0296674859631016	0.291212749983332	-3.92250961929387
cF6IuCGpOGkrgqv57g	ZSCAN2	zinc finger and SCAN domain containing 2	-0.0456750791887518	6.11228176591723	-2.2196107959967	0.0297018858864793	0.291366704146635	-3.92348760057133
WfUfHt1Q5HiV9JFRko	HEY1	hes related family bHLH transcription factor with YRPW motif 1	0.0567298690126857	5.22974879237205	2.21919565220002	0.0297314148824989	0.291472712147823	-3.92432616271431
QWtLCDlTUv9zP0y0CU	ANXA4	annexin A4	-0.0600716990065114	5.89021329463924	-2.21823338039588	0.0297999600356736	0.291882672837281	-3.92626936567633
lmnqOn.tH30oVX9R6c	BCL2L10	BCL2 like 10	0.0480006186766152	5.70291426884484	2.21808235825798	0.0298107303321735	0.291882672837281	-3.92657427239123
uShfctJKk7_gDvDGU4	AGFG1	ArfGAP with FG repeats 1	-0.0506212502265682	6.435560762312	-2.21750792545415	0.0298517278289496	0.29210037639289	-3.92773386200963
c6IkYvL7LWn5rqnh9c	BCAP31	B-cell receptor-associated protein 31	-0.0401588756838478	9.39458398891891	-2.21708916225587	0.0298816463242578	0.292209466065355	-3.92857904289047
9fQq96KKgq3kr1OrhI	B4GAT1	beta-1,4-glucuronyltransferase 1	-0.0604525782240346	6.4062626638543	-2.21648292593327	0.0299250054748676	0.292449771018668	-3.92980235272338
op3vv4MBuBuBUpoKhU	PARP10	poly(ADP-ribose) polymerase family member 10	-0.0355730162971966	9.64269858979041	-2.21618568782592	0.0299462846764876	0.292474127881781	-3.93040203692658
0bECSHlZA2FrrAkVKA	H3F3A	H3 histone family member 3A	0.0268478892284761	12.0332467080992	2.21520673661227	0.0300164615241294	0.292975719754011	-3.93237660099085
feoDnCieKuVFCVF9SA	RCOR2	REST corepressor 2	0.0658664648146401	5.00537868572104	2.2145046671238	0.0300668787741537	0.293063780656341	-3.93379222538127
HCnY15iCgut3lSXlF8	GRN	granulin	-0.0563436817846087	8.05754714896826	-2.21433350239586	0.0300791817806901	0.293063780656341	-3.9341372962475
BpropQx.kAUYBQunOk	HNRNPA1P10	heterogeneous nuclear ribonucleoprotein A1 pseudogene 10	0.0367085746063212	9.64004842617568	2.2141911847975	0.0300894146736689	0.293063780656341	-3.93442419329961
fQbX2EuV1lEh.laXTc	ARID5A	AT-rich interaction domain 5A	0.0510755773770572	5.69929742519365	2.2140331295709	0.0301007827125828	0.293063780656341	-3.93474279706808
xJv67xfdeorXnkHQvU	ELMO1	engulfment and cell motility 1	0.0389461565975474	8.87259043556528	2.21291976747039	0.030180967582581	0.293660814578514	-3.93698652813688
uXi7kf6d5xedeCVZwA	L3MBTL2	L3MBTL2 polycomb repressive complex 1 subunit	0.0378760366341322	8.26037617193794	2.21239987799258	0.0302184744522401	0.293707495305249	-3.93803391474676
QsUXfXgxooAvbzoeNU	ATP5F1	ATP synthase, H+ transporting, mitochondrial Fo complex subunit B1	0.0340009018786702	9.81061298123202	2.21233029706275	0.0302234973971614	0.293707495305249	-3.93817407867421
f1LXRBe19Fy1deFSo4	PPP2R5A	protein phosphatase 2 regulatory subunit B'alpha	0.0348083214293689	7.79458614487118	2.21103680424272	0.0303170062804725	0.294432410339611	-3.94077899927936
lk3UuXoSPUPRIkSuUU	KMT2E	lysine methyltransferase 2E	-0.0477316202520945	5.6578942695774	-2.21029792282672	0.0303705351989224	0.294768386519217	-3.94226641657395
cVdrdRuuzo3utPtXeQ	MAP1LC3A	microtubule associated protein 1 light chain 3 alpha	0.0496552116448439	5.75386035844405	2.20904543600851	0.0304614622034355	0.295140630371433	-3.9447867745945
TCLXXSIUo664T127eU	GTF2IRD2B	GTF2I repeat domain containing 2B	0.0470737476642242	7.90269168375005	2.20901447466511	0.0304637129319026	0.295140630371433	-3.94484906195002
9mfFICWXhFOoruvz6Q	CCDC34	coiled-coil domain containing 34	0.0434329426293342	9.48199688887422	2.20898628013219	0.0304657626546052	0.295140630371433	-3.94490578244039
xWu5ijRJiiAH3oC7pc	RUBCNL	RUN and cysteine rich domain containing beclin 1 interacting protein like	-0.0481938941116713	6.97103087015468	-2.20783521015806	0.0305495480241242	0.295603362337691	-3.94722091906507
raspt5na.ip2mar9e8	CACYBP	calcyclin binding protein	0.0481997700255681	9.47721243572878	2.20779639222761	0.030552377067667	0.295603362337691	-3.94729897504336
xfn0viFxv_lLVJKCM0	NFATC3	nuclear factor of activated T-cells 3	-0.0651084716543514	5.02023875172099	-2.20754791333606	0.030570491608664	0.295603362337691	-3.94779859396409
uvgRJSRL9hK0KCJ79I	RAB40B	RAB40B, member RAS oncogene family	-0.040695421824736	6.76467146063443	-2.20664568111896	0.0306363451492489	0.29605625157263	-3.9496123124719
EVK3TX0oP_S9DiCKiE	UGDH	UDP-glucose 6-dehydrogenase	0.0410143178444269	8.51106086675682	2.20529455675074	0.0307351958698042	0.296683395268388	-3.95232722116124
ZoksX1aLUZO4vq0Lk8	SURF6	surfeit 6	0.0293392523614549	8.89857347681075	2.2052377587455	0.0307393574362738	0.296683395268388	-3.95244131788562
Q6JKxdampCXeP5EXgA	INO80	INO80 complex subunit	-0.0447139479758148	6.75387574324862	-2.2047531079964	0.030774887704607	0.296842287351501	-3.95341478860225
9V4f795ApF5O7e727I	HLA-A	major histocompatibility complex, class I, A	-0.0254580588894678	13.4128356820399	-2.20424311089143	0.0308123150340031	0.297019269628087	-3.95443897034355
TSR.KJUK6MjR_K04v4	ZNF701	zinc finger protein 701	-0.0605880202599986	5.15233038571822	-2.20316518903439	0.0308915522355304	0.297598815100704	-3.95660299072763
oJi9dNBFxoNeCSaVhc	SPATC1L	spermatogenesis and centriole associated 1-like	-0.0601435589901787	5.12130393745056	-2.20280441303823	0.0309181124859598	0.297670485579111	-3.9573270749964
rrpEoFVlUH.o_wwBD4	HCST	hematopoietic cell signal transducer	-0.0533711753668545	7.37227044217697	-2.20225548015763	0.0309585632223862	0.297787016138141	-3.95842859700547
EpRLux56DvU1AI7J9I	SCAF11	SR-related CTD associated factor 11	0.0340203323172708	9.66928839070505	2.20209784130766	0.0309701881666161	0.297787016138141	-3.95874488080633
uJdfoILjSCuMIKEgKE	PPP1R15B	protein phosphatase 1 regulatory subunit 15B	0.060538202212423	4.86552145087036	2.20174794252349	0.030996004836127	0.297787016138141	-3.95944684157991
c.s.wi3TncW_gclI6U	COMMD2	COMM domain containing 2	0.0271866335792215	8.41815689514735	2.20160267418599	0.0310067287487106	0.297787016138141	-3.95973824801971
c12cHhPJU9K30SZ0x4	ZNF239	zinc finger protein 239	0.0701594364781021	5.17991510715866	2.20082487048267	0.0310642026704598	0.29785215150865	-3.96129822949388
uRVzcEUV_nVHUnV7Pg	ESAM	endothelial cell adhesion molecule	0.0346530624227596	8.03386370635109	2.20078839544144	0.031066900196723	0.29785215150865	-3.96137137299522
xdJKfoRema1IRLkhN4	CD37	CD37 molecule	-0.0418148498942184	8.17054837983063	-2.20036367800583	0.0310983254667831	0.29785215150865	-3.96222298286169
ZWuWSDjpVDVutSNPzI	FNTA	farnesyltransferase, CAAX box, alpha	0.0393459338211048	7.96300253464821	2.20013900709785	0.031114960361302	0.29785215150865	-3.96267341773267
ukkACtB_ULR55Tu7Hs	SASH1	SAM and SH3 domain containing 1	0.0550961234459077	5.86673379244123	2.19993401410257	0.0311301450861417	0.29785215150865	-3.96308436633188
fl3HVUn3534V5HsL5U	GPN1	GPN-loop GTPase 1	0.0239015142392061	9.49820496487287	2.19974253225165	0.0311443348498332	0.29785215150865	-3.96346819927705
NOUhME7JJTH5OgHhxE	MYBL1	MYB proto-oncogene like 1	-0.0627006502233683	4.88157241214163	-2.19970067791238	0.0311474372209713	0.29785215150865	-3.96355209410689
l5.deQLR2Arh6aK4p4	C22orf34	chromosome 22 open reading frame 34	-0.078038724153886	4.4136143207842	-2.19916768792523	0.0311869677614393	0.298047092762485	-3.96462032384891
HuvglUkCgOiCsiiOUQ	ORC6	origin recognition complex subunit 6	0.0525775516384541	7.79559028416512	2.1982126195391	0.0312579128297927	0.298541832474977	-3.9665339317955
Tme.WXfl9oZaP_G53Y	RPS7	ribosomal protein S7	0.0313773296436019	9.18784194206429	2.19791693763423	0.0312799055422953	0.298568712129033	-3.9671262244623
QZNzuleozr.9ei_Eek	UXT	ubiquitously expressed prefoldin like chaperone	0.0281819484301688	11.3196565193358	2.19688660654367	0.0313566472049215	0.299117820886163	-3.96918958465655
3CxBSZ.pBjqeTiWeh4	PUS1	pseudouridylate synthase 1	0.0405057485829993	6.47641818821753	2.19490052497573	0.0315050412963584	0.299813929217114	-3.97316458595824
W1It6c6oC4Uf7nh2No	AURKAPS1	aurora kinase A pseudogene 1	0.0679754888632805	4.82839696095566	2.19487526817678	0.0315069323649199	0.299813929217114	-3.97321511561126
BSRJpeeh3iB6gI0iQk	RSAD1	radical S-adenosyl methionine domain containing 1	-0.0554535489810906	5.83783434797132	-2.19465185399595	0.0315236645303693	0.299813929217114	-3.97366206407477
QqJUtDqL3SSoF0DX1c	SEH1L	SEH1 like nucleoporin	0.0321697024747767	7.66350333262796	2.19463430670571	0.031524979029864	0.299813929217114	-3.9736971664202
0g5fdUu53VQTXKRJ.Q	DOCK2	dedicator of cytokinesis 2	-0.026226970849345	11.1959197970499	-2.19462184932437	0.0315259122641582	0.299813929217114	-3.973722086548
ixyjINOupEun3Sinig	KIAA0101	KIAA0101	0.0534656601442689	6.30920392058393	2.19322809987026	0.031630476816738	0.30062470273686	-3.97650941244037
fqu9WlNJElzhT5BBd0	CARHSP1	calcium regulated heat stable protein 1	0.0380907190209198	10.1927588532757	2.19236603186211	0.0316953045247562	0.301057047493231	-3.97823267406709
cGtLFR6K4gkg6X6_14	SMIM8	small integral membrane protein 8	0.0534783760953726	5.10296255595748	2.19096572409762	0.0318008560856518	0.301776224809913	-3.98103061886211
cXfiegZeAeiXRgqeec	SLC3A2	solute carrier family 3 member 2	0.0368489043228489	8.61012189897877	2.19067992832585	0.0318224364206219	0.301776224809913	-3.9816014750935
i6SQgrik0qBqDSnqHg	C10orf10	chromosome 10 open reading frame 10	0.072250508416238	5.04010714131432	2.1905907517715	0.0318291727349613	0.301776224809913	-3.98177958556164
rYaQl7fvnviDm6ZAnQ	IRAK1BP1	interleukin 1 receptor associated kinase 1 binding protein 1	0.039107142705843	6.29072607828848	2.18994637888731	0.0318778851946577	0.301891824961215	-3.98306639142547
EWQGKNZ5naoGYSaZ24	MGLL	monoglyceride lipase	-0.0767293275205683	4.49475858593223	-2.18991645352497	0.0318801490388128	0.301891824961215	-3.98312614409132
30nVYTk.Hd5bq3ktnk	COPZ1	coatomer protein complex subunit zeta 1	0.0350880834527789	8.76187664078221	2.18936012045558	0.0319222611067203	0.302021210327772	-3.98423685845545
WgA1K5aKJIKOIDHolo	DBP	D-box binding PAR bZIP transcription factor	-0.0478042350416794	5.44616721085471	-2.18869024912751	0.0319730321801764	0.302021210327772	-3.98557392662814
NJXqhfuAxkoFKjFN60	MUS81	MUS81 structure-specific endonuclease subunit	0.0407844588934038	7.75083655088015	2.18859506115712	0.0319802524282098	0.302021210327772	-3.98576389376577
9YSXfAlElzuLUFvQpI	SLAIN1	SLAIN motif family member 1	0.042516736206436	6.82431544059341	2.18845707280768	0.0319907217282609	0.302021210327772	-3.98603926513847
cX4rIO4t0gOHk8Xlf8	XYLT1	xylosyltransferase 1	-0.100627522089227	5.28786081034126	-2.18820474217287	0.0320098740423929	0.302021210327772	-3.98654278058418
QeUV54t73rDarMMp3k	JAG1	jagged 1	0.0588365004230725	5.24134163498038	2.1882002767225	0.0320102130678843	0.302021210327772	-3.98655169075453
iSJ9cklYlOBFgOzSFU	TSC22D3	TSC22 domain family member 3	0.0802865825790796	4.80575954512464	2.18748471311339	0.0320645806562505	0.302348101814411	-3.98797929251823
xKpnfhHuX0.1JUSXq0	TYSND1	trypsin domain containing 1	0.0342651563484342	9.10354404992651	2.18723330564999	0.0320837014515292	0.302348101814411	-3.98848077276824
BgnCcruCDoPoJUeX1Q	AASDHPPT	aminoadipate-semialdehyde dehydrogenase-phosphopantetheinyl transferase	0.0347531778843272	7.88038281571042	2.18687055061293	0.0321113083814604	0.302407870479656	-3.98920426902153
r6EwfuCjgICxJd2uuo	TCEAL9	transcription elongation factor A like 9	-0.0423945250571935	6.98235965082093	-2.18663962132879	0.0321288937418648	0.302407870479656	-3.98966479142672
KeeRO8i1Vi3dZ1Cujg	PABPC4	poly(A) binding protein cytoplasmic 4	0.0301922366886106	11.100674605017	2.18516748561021	0.0322411958065748	0.303174906699825	-3.99259955434138
fQBeoP6vuzmDv0uXSE	PTGS2	prostaglandin-endoperoxide synthase 2	-0.0682283823271849	4.87728145521082	-2.18502859266671	0.0322518089910903	0.303174906699825	-3.9928763546889
0V.foqL6xLSX_oINR4	TBC1D8B	TBC1 domain family member 8B	-0.081697952860663	4.99153737078434	-2.18474994054853	0.0322731107739581	0.303174906699825	-3.99343163571277
9SWTkflUT0eeHp9HoM	EXOC2	exocyst complex component 2	0.0487244633091257	5.87172882171996	2.18455156365226	0.0322882833574197	0.303174906699825	-3.99382691174358
Worur11BEP595W_314	GRWD1	glutamate rich WD repeat containing 1	0.0436262341419665	7.99233977368247	2.18314959806104	0.032395688857927	0.303725643391747	-3.99661951238438
WfhD1alfS1eJLcfe7c	CASP2	caspase 2	0.0378132951800351	7.02772834911378	2.18281507326738	0.0324213631815711	0.303725643391747	-3.99728562871207
EZ36jee93UqdSBeMXs	FOXO3	forkhead box O3	0.0534189678937039	5.99199786661284	2.18276496454042	0.0324252104913938	0.303725643391747	-3.99738539916991
iYen13dK56Puq8uk.U	CDC42BPA	CDC42 binding protein kinase alpha	0.0682979056280078	5.58967236191463	2.18226030821037	0.0324639798997449	0.303725643391747	-3.99839009932482
cMniVI7195NdYNUqeo	ARSB	arylsulfatase B	0.0754064494576472	4.78149848842506	2.1820176117852	0.0324826391021373	0.303725643391747	-3.99887320222915
KudFFVORGU3uwfSje8	CARD9	caspase recruitment domain family member 9	-0.0549163431972834	5.84176944625991	-2.18199944226789	0.0324840364046606	0.303725643391747	-3.99890936795206
rRCCEJN7rmikJKcHKI	TMEM41B	transmembrane protein 41B	-0.0379229667418287	8.76047093965027	-2.18195219067052	0.0324876704720737	0.303725643391747	-3.99900341921029
ll0T9Ufivimx6IQRdI	KIF3B	kinesin family member 3B	-0.0324707306965409	7.23696399126304	-2.18175273901409	0.0325030139960592	0.303725643391747	-3.99940039541381
H5SXVArcIogAefUuvU	BLM	Bloom syndrome RecQ like helicase	0.0374548533416017	7.5143239027976	2.18062559687809	0.0325898426203758	0.30435433108219	-4.00164319779438
H0gTUBdCnSjVMhSJUU	SMARCE1	SWI/SNF related, matrix associated, actin dependent regulator of chromatin, subfamily e, member 1	0.0278790058998653	8.54735975830515	2.18011064554329	0.0326295790404663	0.304542737711019	-4.00266752030548
fkEiHp63kCXAM7Xu6U	SIRT5	sirtuin 5	-0.0607742442847676	5.10027639296835	-2.17953843249645	0.0326737837994506	0.304772598076601	-4.0038054996248
rpLUl4X95EdSEB9UhA	GLG1	golgi glycoprotein 1	-0.022481789331705	9.98652197829922	-2.17875455611046	0.0327344250753038	0.305155406929539	-4.00536400034285
EqOojHvutF3oAxPecc	IL1R2	interleukin 1 receptor type 2	0.0734603575654502	4.75532085760449	2.17810437975476	0.032784797890845	0.305442090702977	-4.00665631009138
Ktvkjco7r7osfJNoHk	METTL5	methyltransferase like 5	0.0327088946219298	9.9712007913831	2.17736844546168	0.0328418966543871	0.30579105688726	-4.00811867112764
BmLTVTSiJlH2SwjYj4	YBEY	ybeY metallopeptidase (putative)	0.0406070092836096	7.63059750153221	2.17703975414056	0.0328674268390068	0.305845846401469	-4.00877166889022
KITpG73gFHrt50ju_o	CYP2J2	cytochrome P450 family 2 subfamily J member 2	-0.0532551783610883	5.98102345108589	-2.17634027250196	0.0329218149126489	0.305891218700395	-4.01016101608999
QfQKRJKSDipRKSi67o	SDHAF2	succinate dehydrogenase complex assembly factor 2	0.0346073202886339	10.3944326854936	2.17621038180218	0.032931923202276	0.305891218700395	-4.01041896917721
N05UXZUgXgeXmjt0Z8	FAM212A	family with sequence similarity 212 member A	-0.0481365074455773	5.83122001744064	-2.17599393337836	0.0329487735744513	0.305891218700395	-4.0108487896655
xqk3l6LxfU06cXnuv4	ZBP1	Z-DNA binding protein 1	-0.064380243858762	7.05428728376319	-2.17596665652412	0.032950897595103	0.305891218700395	-4.01090295305868
NquTR9XrPXFABUD1S4	C3orf62	chromosome 3 open reading frame 62	0.062634791626798	5.08717069620459	2.17550590545111	0.0329867939072801	0.306041959206518	-4.01181777310309
ipfUhn0.__.q.mkqRA	RPL6	ribosomal protein L6	0.0401250759913842	8.30352357679367	2.17446866726044	0.0330677284936514	0.306138623112585	-4.01387659153431
WGWVF51_.5Liq1JV4s	LCNL1	lipocalin like 1	-0.0771595687738937	4.38303808948389	-2.17422542704483	0.0330867333826085	0.306138623112585	-4.01435927670885
0KbofHPz54OHFBLiJU	CD69	CD69 molecule	-0.0517851806335569	8.57320541879597	-2.17415006562489	0.0330926234723822	0.306138623112585	-4.01450881418123
uiu.k7pTxbT6XuCT6E	MYCBP2	MYC binding protein 2, E3 ubiquitin protein ligase	-0.0433633940401153	9.21915954668177	-2.1741156985011	0.0330953098387263	0.306138623112585	-4.01457700637117
uNfddVZV40VlVo0gMw	ZC3H18	zinc finger CCCH-type containing 18	0.0523886423515424	5.59560555518934	2.1741128067319	0.0330955358876208	0.306138623112585	-4.01458274425629
HtXEooEul_ffIa30e4	CRKL	CRK like proto-oncogene, adaptor protein	-0.0335004811503826	10.2875313444053	-2.1736632397332	0.0331306948536744	0.306281863112829	-4.01547470022708
WrPqb14RAeKXXJCHpI	HIST1H2AG	histone cluster 1 H2A family member g	0.0662097884009959	5.04071488932428	2.17229150883255	0.0332381747524028	0.307093118424574	-4.01819527056758
c38M146Qkh4yeRP6Tk	UBE2Q2	ubiquitin conjugating enzyme E2 Q2	0.0381252940706443	9.14811701684423	2.17187549890372	0.0332708307632748	0.307212510867534	-4.01902005339281
NjrlEjOgl7XXnjn9Po	PSPH	phosphoserine phosphatase	0.0536837383455039	7.1359109758773	2.17091661109531	0.0333462085313916	0.307335427395752	-4.02092062549358
BWzioHuyEKxStLffU4	SP100	SP100 nuclear antigen	-0.0433406563912676	5.9713907891934	-2.17079770830995	0.0333555658240469	0.307335427395752	-4.02115624702929
HIIV4VHir__4g_eCUY	ACAD11	acyl-CoA dehydrogenase family member 11	-0.0443309587544219	8.3652503526708	-2.17077357571459	0.0333574652670872	0.307335427395752	-4.02120406757863
NCic.6rdv5UqKn6dRQ	DMWD	dystrophia myotonica, WD repeat containing	0.0615055573955851	6.01091198184633	2.17026080261194	0.0333978472779043	0.307335427395752	-4.02222005685825
6nk4QJbUDVx1VFwIeo	RTP4	receptor transporter protein 4	-0.0420743867103673	6.35455230076483	-2.17023605507152	0.0333997972815546	0.307335427395752	-4.0222690854287
ckL6I6KiPL171CXS4I	DFNB59	deafness, autosomal recessive 59	0.0719060313330224	4.51945940172753	2.17013586059527	0.0334076932082077	0.307335427395752	-4.02246758067537
u_Sp0JRQ3OCF0pSquI	PRMT5	protein arginine methyltransferase 5	0.0383368192421775	8.37055854468806	2.1699501466216	0.0334223328996023	0.307335427395752	-4.02283547752586
oV9YmmXCX_W4k5EeIM	KLF6	Kruppel like factor 6	-0.0382407836320965	9.94916164187156	-2.16926018657784	0.0334767710465239	0.307654292592848	-4.0242020394678
33iteiuU.V3e_CQKWo	RRBP1	ribosome binding protein 1	0.0540717887905218	5.29153654068259	2.16847469943201	0.0335388406344201	0.308042873744338	-4.02575734667638
3sef0u71V0lXWm7Skw	C14orf2	chromosome 14 open reading frame 2	0.0298166113891462	8.79128095599894	2.16768091346257	0.033601668141829	0.308437953792449	-4.02732858894565
9kp4KA69O4w7qes13I	ING3	inhibitor of growth family member 3	0.0256517751048085	8.5609167784085	2.16723061001546	0.0336373549868765	0.308583584228458	-4.02821971009349
WrT6UfTcSSXvVL1eKU	SLC10A3	solute carrier family 10 member 3	0.051874147667306	6.23033210913745	2.16648670850558	0.0336963822162079	0.308751594814909	-4.02969149032169
K76SYRTVMSnfF33Xio	SP140	SP140 nuclear body protein	-0.0376960206812565	9.10869773180314	-2.1663399977289	0.03370803412679	0.308751594814909	-4.0299817000659
ujAVU3hSATlDXiDBdU	FAM213B	family with sequence similarity 213 member B	-0.0561551893709449	5.56290581218116	-2.16625021563295	0.0337151664430464	0.308751594814909	-4.03015929031555
W36eilK6EF7TR4feAI	FBXO22	F-box protein 22	0.0405226505669139	7.95216434720958	2.16477764253964	0.033832336376861	0.309642453095222	-4.03307114792223
WV75H6een1XTXe94L8	ZNF230	zinc finger protein 230	-0.0598090616884117	4.56198974385215	-2.16397409515915	0.03389642304618	0.310046717968819	-4.0346593522351
K63vX_n936K6tkkUjo	TIMELESS	timeless circadian clock	-0.0355215620287989	9.01684973827078	-2.16335137946265	0.0339461604407685	0.310169812958706	-4.03588979186111
oYDL6NCnlFKp4Cj5.o	FASTKD1	FAST kinase domains 1	-0.0317042478736635	8.35274461767101	-2.1632882716214	0.0339512045300966	0.310169812958706	-4.03601447105654
TJ51wIIpIpTgwXglVE	C2orf49	chromosome 2 open reading frame 49	-0.0394451043706038	7.73628915970656	-2.16305754953604	0.0339696512779158	0.310169812958706	-4.03647027092769
Kp.p0VUciT.9OT1R40	CTPS2	CTP synthase 2	0.0442631090912339	5.64183582033309	2.16239385338816	0.0340227640870068	0.310472679546613	-4.03778119118229
EnShOkpEpnh.d9f4l4	CCNL1	cyclin L1	-0.0490375236159763	8.75833496022999	-2.16192764558294	0.0340601160849996	0.310631451207542	-4.03870182703782
u2qAe7ueCLG6id3uc0	ANKDD1A	ankyrin repeat and death domain containing 1A	-0.0446433949447065	6.79225553607237	-2.1614558025472	0.034097956026985	0.310654949595521	-4.03963341524987
ZigorLhyi4M4qK.eqI	ASCC3	activating signal cointegrator 1 complex subunit 3	-0.069188448102824	5.34745218595165	-2.16139710195723	0.0341026661482726	0.310654949595521	-4.03974929900634
iVVBLu2Lf5AgF.I7r0	RGMB	repulsive guidance molecule family member b	0.0612088332545666	5.00482728358352	2.16114929014937	0.0341225567708338	0.310654949595521	-4.04023848647247
lRy_KLIIo4UnIdU6D4	ATPIF1	ATPase inhibitory factor 1	0.0665111791729634	5.93356019812073	2.15919225075806	0.0342799947971604	0.3119058790194	-4.044100023679
0r_C6LdOF3SDCu0XV4	ABCC4	ATP binding cassette subfamily C member 4	-0.0454066165396386	8.43691238453149	-2.15792792953783	0.034382042547677	0.312651657933549	-4.04659310458442
WUT36ngZqXeEefEeR0	PHGDH	phosphoglycerate dehydrogenase	-0.0373647641001421	11.2458385641686	-2.15717352696323	0.0344430592276205	0.312981763773961	-4.0480800856207
ZSdOqCUTITV.fV_RnY	DPF2	double PHD fingers 2	0.0279171071797487	8.79749070143567	2.15698215755112	0.0344585523579502	0.312981763773961	-4.04845721640225
EpJ.1qukppEvorByj8	DOT1L	DOT1 like histone lysine methyltransferase	-0.0686302190033325	5.02432540536735	-2.15610410132699	0.0345297171650424	0.313445269285936	-4.05018722442771
0WGoE3UEgkAaAuXVoU	CACTIN	cactin, spliceosome C complex subunit	0.0522364760398827	5.11684935681395	2.15514439066368	0.034607646588564	0.313969604947998	-4.05207741277869
iV7rSdfVRf8W6QW0Jw	CHRAC1	chromatin accessibility complex 1	-0.0483801954011757	5.68910111041736	-2.15474716720401	0.0346399463938933	0.314079607140437	-4.0528595459375
xiStt5q_gBQIFK40ec	BBS2	Bardet-Biedl syndrome 2	-0.0621194063339708	6.90882076335188	-2.1531019866204	0.034774002754964	0.315111568620069	-4.05609757128788
B4ilUaruphnvOwMiec	DMAP1	DNA methyltransferase 1 associated protein 1	-0.04161380005068	8.38827818628254	-2.15277341015329	0.0348008307322264	0.315171223292205	-4.0567440138012
QLnvok6KJ6KI6o6HhI	LIPH	lipase H	0.0901642206677181	4.40806407507022	2.15244188204219	0.0348279180074389	0.315222930245443	-4.05739617635652
N0qXoC3fUvTSrLIXtI	MRFAP1L1	Morf4 family associated protein 1 like 1	0.0286208658963701	9.86844332884693	2.1522080222941	0.0348470364178063	0.315222930245443	-4.0578561588792
uiBWU0q7cXB90qHEfo	RAPGEF5	Rap guanine nucleotide exchange factor 5	-0.0526593220443677	6.15254077214359	-2.15153615332086	0.0349020137288641	0.315295171470915	-4.05917742679172
o7pBFVJ.p1ANNYrXig	POLD2	DNA polymerase delta 2, accessory subunit	0.0315292125118201	8.49282610830057	2.15130573914218	0.0349208853436217	0.315295171470915	-4.05963046646329
fXO6I_yCOreuN601BI	ZBTB8A	zinc finger and BTB domain containing 8A	0.079025505498112	4.42419783993113	2.15104495397379	0.0349422551708496	0.315295171470915	-4.06014317052624
c6dUHXVzXApUek8C54	CETP	cholesteryl ester transfer protein	0.0683561723896009	6.66658956381985	2.1508736081018	0.0349563021766474	0.315295171470915	-4.06048000733136
xUeoMeJU3dXEn3fEUk	ELK4	ELK4, ETS transcription factor	-0.0649380289074457	4.97400753411966	-2.1506897085283	0.0349713838197877	0.315295171470915	-4.06084149658518
NSo6d.lOrfP9Fd.3sI	NEMP1	nuclear envelope integral membrane protein 1	0.0290494591042323	8.42386230498307	2.15062686262005	0.0349765391270729	0.315295171470915	-4.06096502588703
xF7uBdOUJEjMqemSuc	BBS9	Bardet-Biedl syndrome 9	-0.047095109635802	5.37599115839303	-2.14963405973303	0.0350580676427331	0.315847220522031	-4.06291605252006
uukp6Lz4JIukt9L_SI	IVNS1ABP	influenza virus NS1A binding protein	-0.0399375110671011	7.95163752788321	-2.1489637064068	0.0351132104372382	0.316079073024588	-4.06423296724309
0Ev0FSimgvkuJYhZRM	LOC100134868	uncharacterized LOC100134868	-0.0680133930448338	7.20437811802518	-2.14882768354585	0.0351244088086163	0.316079073024588	-4.06450014164094
HelRdSXSck8V94R3c4	SLAMF6	SLAM family member 6	0.0486027451217885	7.07572475080422	2.14684870497204	0.0352876850326468	0.317364922350228	-4.06838556052705
Q3iKW7XBeV6VaIJxvk	RAB4B	RAB4B, member RAS oncogene family	-0.049245109321531	5.94186144636146	-2.14640978967661	0.0353239873991072	0.3175079883541	-4.06924688045496
9xJc3ThTPgOxoP41OY	LIG4	DNA ligase 4	-0.071179930313463	4.81747568148921	-2.1460967614552	0.0353498976230795	0.317557533869649	-4.06986106800317
r8ldIFhlIH2K6X3TeY	SMTN	smoothelin	0.0525557144541654	4.8310826453934	2.14516896171555	0.0354267915629434	0.3180647583921	-4.07168103024053
foL5LieM05V7HUl6uE	IL10	interleukin 10	-0.0515378667593825	10.479815157499	-2.14491545991249	0.0354478265620562	0.318070180932617	-4.07217817745668
NdqXhBGTGvCk_UXH24	RNU6ATAC	RNA, U6atac small nuclear (U12-dependent splicing)	0.093860174951841	6.36536206715946	2.14427349304872	0.0355011442024511	0.318168151135116	-4.07343692193853
HiTqPjaSQiwIRJ1IpU	MRPL38	mitochondrial ribosomal protein L38	0.0336607649650073	8.50455851545517	2.14423435395057	0.0355043971038163	0.318168151135116	-4.07351365379171
0Je9NYkuakxBriB6IE	CRTAP	cartilage associated protein	-0.0444691385009469	6.62092580001726	-2.14393957136405	0.0355289052157397	0.318168151135116	-4.07409153321502
iQXlE.6if9xO3v903s	LACTB	lactamase beta	-0.0512587980531407	5.74877028681654	-2.14380024037496	0.0355404942718375	0.318168151135116	-4.07436464774939
oXp9LXxDtLAEl_epeE	DHRS4	dehydrogenase/reductase 4	0.0423056907516065	6.41086718727592	2.14240006778927	0.0356571386787128	0.318843202062654	-4.07710838645519
BI_6Dq7CEPrKq4C6v4	SFPQ	splicing factor proline and glutamine rich	0.0783624536536335	7.27653567811746	2.14207365028004	0.0356843794990076	0.318843202062654	-4.07774780043616
9uC64CCq6gZ6H3of6k	KLC4	kinesin light chain 4	-0.0731375190758053	4.8316475902106	-2.14197082376962	0.0356929645295531	0.318843202062654	-4.07794920803602
xwKNalQRkT0Sy9UqSQ	TM2D3	TM2 domain containing 3	0.0481535600396772	5.96631264804019	2.14191264697201	0.0356978225330939	0.318843202062654	-4.07806315594018
cp6ipNenv0Vuh_B_U8	BCL2L12	BCL2 like 12	0.0320026727052026	9.06914497043785	2.14076817096213	0.035793508240701	0.319514527689927	-4.08030423373603
BUZICdG5eSpSgKgONs	EMC8	ER membrane protein complex subunit 8	0.0478440820214453	6.46118699404926	2.13926560041252	0.0359194722311484	0.320455211286257	-4.08324493584342
cAoqNe1Cl5jxNai_ZQ	USF2	upstream transcription factor 2, c-fos interacting	-0.0372750384303744	6.90736697870036	-2.13858831736723	0.0359763765939203	0.320779055449113	-4.08456986746156
x6q7AIi0SsVQosjlKs	MAGEH1	MAGE family member H1	-0.0438183023608395	6.94328195931105	-2.13805433548465	0.036021296341496	0.320834276881079	-4.08561420896945
o6IBVyg7DS7yjl0l4E	ZNF558	zinc finger protein 558	0.051401731806068	5.91319300346967	2.13802474486734	0.0360237869982095	0.320834276881079	-4.08567207452572
HfuS756J6Xrt1A4U4A	SLC15A2	solute carrier family 15 member 2	-0.0684669122741752	4.65335840863279	-2.1370018821242	0.0361099741127822	0.321417997134244	-4.08767189143525
rJ55CEkOEtReWl49eQ	FKBP9P1	FK506 binding protein 9 pseudogene 1	0.055763269243004	5.3739772448812	2.13391436863998	0.0363712201628363	0.323558374568592	-4.09370328040572
fb3eXRMnxCUnogM6x0	EIF2AK2	eukaryotic translation initiation factor 2 alpha kinase 2	-0.0378098441549791	10.4408389209458	-2.1330107524776	0.0364479891109286	0.323601969113649	-4.09546703529309
cUKREqx.ehUeehIfgo	LHPP	phospholysine phosphohistidine inorganic pyrophosphate phosphatase	-0.0446133234446075	6.36327472457936	-2.13298275375644	0.0364503700629926	0.323601969113649	-4.0955216751668
Be7EBVUC7V45SQV_Ro	TAPBP	TAP binding protein	-0.0571403045831289	5.08969169024811	-2.13297056369704	0.0364514067221835	0.323601969113649	-4.09554546403298
oHQJwoktKBUjCAlNcs	EXOG	endo/exonuclease (5'-3'), endonuclease G-like	-0.0581572088536201	4.74840086944387	-2.13287815582968	0.0364592660473626	0.323601969113649	-4.09572579386428
rqVD33UYQ5WFk75EFQ	SETMAR	SET domain and mariner transposase fusion gene	0.0391323455860395	7.60434199701285	2.13171943731069	0.0365579407961392	0.324292890207575	-4.09798640261436
QSeVjHi_pxEiSe9S9c	GPAT2	glycerol-3-phosphate acyltransferase 2, mitochondrial	0.0858512866961263	4.25758531697219	2.12975548541688	0.0367257189518597	0.325595667791886	-4.10181553734119
liCOpICeiVei_nu3u8	FEN1	flap structure-specific endonuclease 1	0.0324389213048214	10.5845003637039	2.12925883412019	0.036768253305283	0.325657134543922	-4.10278337477058
c57HuJV10d3FBXAV4o	KMT2A	lysine methyltransferase 2A	0.0509907662465343	5.73913869418593	2.12918606688129	0.0367744888571566	0.325657134543922	-4.10292516164915
35JI0WlGmt1inNxq.8	NDUFA12	NADH:ubiquinone oxidoreductase subunit A12	0.0283229525222844	10.8757886867461	2.12854285928783	0.0368296464667892	0.32577791702847	-4.10417826690845
9viiIqfW7HSjsi0_dI	ERCC6L2	ERCC excision repair 6 like 2	-0.0387770726647018	6.01189981892908	-2.12853896842848	0.0368299803423758	0.32577791702847	-4.10418584612454
HlBzpe6NA1JeeXn.zo	TFAM	transcription factor A, mitochondrial	0.0292753516757824	9.76149945546817	2.12788005937433	0.0368865594885083	0.325969730930478	-4.1054691963405
u55QF4qe6roOJ6CluM	PCBD1	pterin-4 alpha-carbinolamine dehydratase 1	0.041686144180241	7.56555798071959	2.12779880043299	0.0368935422597317	0.325969730930478	-4.10562743949211
Wnte91N1P31TnsFUp0	PATL1	PAT1 homolog 1, processing body mRNA decay factor	-0.0335887883495911	9.61011203199209	-2.12712434902155	0.0369515438501507	0.326177451966945	-4.1069406582627
6n5.13qRFP_NPBSLF0	TMEM167A	transmembrane protein 167A	-0.0261013052736695	9.3559660532779	-2.12693759933716	0.0369676179994886	0.326177451966945	-4.10730421276017
9ELgpTQIPq4UbhQTkY	FTH1P3	ferritin heavy chain 1 pseudogene 3	-0.0475781273018356	8.08261830172551	-2.12670753679441	0.0369874285892431	0.326177451966945	-4.10775204813712
ZXeOnoxSSeU3dBNB_c	TRAPPC11	trafficking protein particle complex 11	0.0412080770335085	6.18798566359599	2.12655162351545	0.0370008594664456	0.326177451966945	-4.1080555219143
QVuhFUheYKONlYwIaM	MATK	megakaryocyte-associated tyrosine kinase	-0.0576466737320201	5.11914108571558	-2.12459129278375	0.0371700910879285	0.327429550581109	-4.11186950385125
BU5dIe0VXFL1QtTuxU	PTPRCAP	protein tyrosine phosphatase, receptor type C associated protein	-0.03014383516748	9.21082871055499	-2.12434567990136	0.0371913417648592	0.327429550581109	-4.11234714697036
xUp5ItVCj8MKeuv9Og	SLC25A26	solute carrier family 25 member 26	0.0431396571326835	6.08809795808652	2.12417643152469	0.0372059914554202	0.327429550581109	-4.11267625603966
HkTvS5UoJFlTUd9eH0	G6PC3	glucose-6-phosphatase catalytic subunit 3	-0.04140544517402	6.21363517279158	-2.12335694688778	0.0372769948704786	0.327461821243555	-4.11426944704235
cXBX4OHQNLlK6KHVNE	CSTF2	cleavage stimulation factor subunit 2	0.0311791643410559	8.99510915445673	2.12299695378484	0.0373082233406736	0.327461821243555	-4.11496915341749
x4uA4n.n8.1C.d3RfQ	CUTA	cutA divalent cation tolerance homolog	0.0581239380262553	5.25594993498333	2.12261683713232	0.0373412221666691	0.327461821243555	-4.11570786073869
QpUTnhEh0dIhXyEehQ	POMGNT1	protein O-linked mannose N-acetylglucosaminyltransferase 1 (beta 1,2-)	-0.0352341683591769	8.07367822699587	-2.12227118731112	0.0373712508744062	0.327461821243555	-4.11637948591589
le5TV4X6FZeKrhLosg	UQCR10	ubiquinol-cytochrome c reductase, complex III subunit X	0.0428278814248014	8.28264821825411	2.12223221016762	0.0373746383735501	0.327461821243555	-4.1164552156187
oR_1Djuztwl07Fj_C0	STX2	syntaxin 2	-0.0326612893454113	7.20616632766137	-2.12186160980143	0.0374068605495609	0.327461821243555	-4.11717520396362
BhV3kDu0t1AiLN1VQM	GLRX5	glutaredoxin 5	0.0272131579026489	11.551092977843	2.12174400954349	0.0374170904549214	0.327461821243555	-4.11740365032144
lS.0sOLoSwuuneSOlU	DIS3L	DIS3 like exosome 3'-5' exoribonuclease	0.0360977794915574	8.60214824462353	2.12150702241496	0.0374377130710837	0.327461821243555	-4.11786398003542
34jhDd_BUopor5LieI	GJC1	gap junction protein gamma 1	-0.0522094346535299	12.2237705199587	-2.12150322417824	0.0374380436740275	0.327461821243555	-4.11787135745936
HrsMuo7efL6Sq9LUDo	YRDC	yrdC N6-threonylcarbamoyltransferase domain containing	-0.0267332089101196	9.58927107568368	-2.12144227043717	0.0374433495058128	0.327461821243555	-4.11798974807718
rLRDq_Xt151gBF_Lak	AGBL5	ATP/GTP binding protein like 5	0.0312042617770378	6.91088277964256	2.12139639072558	0.0374473436218927	0.327461821243555	-4.11807885840549
oOnzp2j3VSDW7PAkSk	ZNF626	zinc finger protein 626	0.0734215829977215	4.54019488158348	2.12122726972106	0.0374620698634874	0.327461821243555	-4.11840732081982
0Ubt3qoc4DUY6jgXok	UBL5	ubiquitin like 5	0.0261313717485288	10.282125769585	2.12085127683006	0.0374948275521394	0.327564239804549	-4.1191374824298
cULBQPVUCEorunjqxE	THUMPD2	THUMP domain containing 2	0.0286571356702469	7.20486345770011	2.11988848542126	0.0375788225298033	0.327627411679949	-4.12100666514308
EJ5MzB0oj1O390z9Io	COMMD8	COMM domain containing 8	-0.0631573301811279	5.13792948548076	-2.11978148813983	0.0375881671811233	0.327627411679949	-4.12121434602622
ZuFe6xYnXgNdep5Azw	CDK2	cyclin dependent kinase 2	0.0593332148956439	6.34290475808597	2.11967056030006	0.0375978572418937	0.327627411679949	-4.12142964641827
uVNI2EOeG3zP_UvL3g	SNORD12C	small nucleolar RNA, C/D box 12C	0.0452947669758002	5.93059946533288	2.11950615904558	0.0376122224470676	0.327627411679949	-4.12174871551066
ZdAgvESX6eCQHlwCiU	GIMAP2	GTPase, IMAP family member 2	-0.0513462685792382	6.65482814066054	-2.11948116861413	0.0376144065018246	0.327627411679949	-4.12179721491483
KigCu6rebleQinTQe4	CXXC4	CXXC finger protein 4	0.0558158411788253	5.64878728284981	2.1189656854191	0.0376594820813796	0.327627411679949	-4.12279751142355
ZdI45Se3VG7s869FKo	FKBP5	FK506 binding protein 5	0.0365092066354024	8.94206615723509	2.11869018524832	0.037683591986734	0.327627411679949	-4.12333203301879
xAVICc5yNVUJUtitXo	RNF25	ring finger protein 25	0.0542989619332847	5.16327734495455	2.11862305554481	0.0376894687551825	0.327627411679949	-4.12346226792865
lJSl6qSXdVJdVuUAN8	LMNA	lamin A/C	0.0547718715663007	10.2558407524402	2.11860027878663	0.0376914628930363	0.327627411679949	-4.12350645513448
x_iA44nGX44CBbvrnk	PPT1	palmitoyl-protein thioesterase 1	-0.0260429573667301	10.5005238092885	-2.11790551415061	0.0377523346104569	0.327973406928344	-4.12485410797395
95M.odJTU8IFTvtd6E	VPS35	VPS35, retromer complex component	0.0246546832109978	9.69739510314463	2.11757396754913	0.0377814131266737	0.328042966846657	-4.12549708123288
ouS1E7kwoU6on7P6g8	NSUN4	NOP2/Sun RNA methyltransferase family member 4	0.0330305140720269	8.29950187696902	2.11674004683487	0.0378546387650221	0.328369610611913	-4.12711392697499
oOmVVJa6z9DQhLl5Ig	HAUS8	HAUS augmin like complex subunit 8	0.042552244780964	6.95505930153659	2.11666518197796	0.0378612185925221	0.328369610611913	-4.12725905133309
oo3h9L7kjBJOMDi2oU	REL	REL proto-oncogene, NF-kB subunit	-0.0595668063284062	6.07737147306579	-2.11547242054918	0.0379661838096769	0.328807408343522	-4.12957059531179
fV51RIESQ9dKcJ5a98	PECAM1	platelet and endothelial cell adhesion molecule 1	-0.0498269865152604	5.24318038731768	-2.11529687055859	0.0379816538596956	0.328807408343522	-4.12991071092352
6rtQQSd506d0CBSaF4	POGZ	pogo transposable element with ZNF domain	-0.0548285474137501	5.10129660612733	-2.11505536424806	0.0380029451500334	0.328807408343522	-4.13037857186974
rl97KD3.qguKCUrUa0	CD83	CD83 molecule	-0.02922119227241	9.93590702799717	-2.11503562300439	0.0380046860041244	0.328807408343522	-4.13041681376102
BU.XuUg0edz1MW5Too	HARS2	histidyl-tRNA synthetase 2, mitochondrial	-0.0318153001868783	9.23709526952725	-2.11489259778334	0.0380173005535932	0.328807408343522	-4.13069386676588
BVTItEn.oqvRINekkk	TMEM38A	transmembrane protein 38A	0.0526366760419821	5.25077692555246	2.11341876705816	0.0381475016094296	0.329750308193004	-4.13354785783466
QXF50KEKqLER660Dqo	FLNA	filamin A	-0.086688806616458	5.3231028004416	-2.11300516615807	0.0381841094439563	0.329883582587965	-4.13434846018005
rfkkneukntfigX_u7o	PHF5A	PHD finger protein 5A	0.0412008977361948	9.41396858459314	2.11274953975986	0.0382067502027969	0.329896110458759	-4.13484320461432
Nt.kfERHfXveX0XOWo	POLE4	DNA polymerase epsilon 4, accessory subunit	0.0302476180053147	10.4024422051301	2.11142012870728	0.0383246838674764	0.330730974749929	-4.13741532889282
x1qeooiBRQoaer8cZQ	WWOX	WW domain containing oxidoreductase	0.0676299412599177	4.95396632844498	2.11109644148823	0.0383534463663428	0.330795818853864	-4.13804137954687
lrfoO4ET7_y5zU9d14	NAP1L1	nucleosome assembly protein 1 like 1	0.0330751934440966	10.0925235488076	2.1105495487195	0.0384020852645964	0.33103192879249	-4.13909894617841
f57_qnV6Vg30fU9KAU	MPDU1	mannose-P-dolichol utilization defect 1	-0.0552255469078957	5.90518949240676	-2.1097440168597	0.0384738242465992	0.331466793509162	-4.14065622545263
uor8nTo_mnU9yXf6sU	ACTL6A	actin like 6A	0.0269218702306085	9.73136680393769	2.10931090458322	0.0385124444016868	0.331546238038604	-4.14149331650831
NE_8qgdKcu0m36.qiA	FAM102A	family with sequence similarity 102 member A	-0.0477474355253196	6.76162327295771	-2.10916302035422	0.0385256387854467	0.331546238038604	-4.14177910301506
NVJ7oUeXgK.sSOTlEs	ZNF207	zinc finger protein 207	0.0235402533674309	10.1739216762235	2.10887298299011	0.0385515276162611	0.331585735872903	-4.14233954975078
uEJV7aLfSOl6Aft5Uk	SLCO4A1	solute carrier organic anion transporter family member 4A1	-0.0538128469635277	5.75714488271514	-2.10812419556843	0.0386184344728248	0.331977795622825	-4.14378613921632
WnsDJ3kpQrJTLCC16I	HIST1H3E	histone cluster 1 H3 family member e	0.0564065758940301	5.31034552019011	2.10667880254217	0.0387478706942931	0.332906650645008	-4.14657723562923
QGSUg18Le7v3u3Qh6k	TUFT1	tuftelin 1	0.0648549637247948	4.99573194854	2.10598115318439	0.0388104804386887	0.333260650562331	-4.14792381729831
KqoWA.nnCUTBXp9pOo	ILF3	interleukin enhancer binding factor 3	0.0494011588436319	5.69922646635869	2.10512460854364	0.03888747012333	0.333737670826903	-4.14957655971767
9u.uh6PRCtOIerylSU	MST1	macrophage stimulating 1	-0.0537759871427241	7.05956629169358	-2.10468652633196	0.038926897923968	0.33389198175225	-4.15042163198605
N2B1J9CDu.05Wl.vXU	MEIS2	Meis homeobox 2	0.0591771697952418	5.66234354580728	2.10413855219104	0.0389762649309377	0.333962810799633	-4.15147847187397
x8exISAAeI7JV3XoLk	SLC25A13	solute carrier family 25 member 13	-0.0328896316066488	8.04421160602524	-2.10402334794238	0.0389866505938639	0.333962810799633	-4.15170062769077
ipJ3u3iC9xPhSlV__U	SIDT1	SID1 transmembrane family member 1	0.0472369473753028	6.84584817595402	2.10376743639595	0.0390097296118114	0.333962810799633	-4.15219408038779
xOlnlJUhnnhnuwO5EM	PPP1R13B	protein phosphatase 1 regulatory subunit 13B	-0.0447477799258786	5.82313836441687	-2.10342566835071	0.0390405699628773	0.333962810799633	-4.1528530009566
Q9RVhUB6CD9SCUpG6Y	TRAF4	TNF receptor associated factor 4	0.0576817554687137	5.9641533255514	2.10322132522948	0.0390590195134782	0.333962810799633	-4.15324692478427
cn.4qStft.sb3tVJVk	VPS37D	VPS37D, ESCRT-I subunit	0.0674607605260822	5.59476232316354	2.10316765156584	0.0390638668079478	0.333962810799633	-4.15335038899163
fhJC1FcH7xEkTFEr3o	DCAF12	DDB1 and CUL4 associated factor 12	-0.0260852033116904	8.74076010952146	-2.10264793671323	0.0391108295085063	0.334119473738504	-4.15435209934304
cpN.QldnevdKkk.1KY	LSM4	LSM4 homolog, U6 small nuclear RNA and mRNA degradation associated	0.0375951557244682	9.52828074614166	2.10248994575431	0.0391251156619535	0.334119473738504	-4.15465657176425
l7afEnfWi3Il7673tU	COBLL1	cordon-bleu WH2 repeat protein like 1	0.0859288743112595	4.23105162470534	2.10196877498138	0.0391722740432649	0.334338795123655	-4.15566080438831
QqOEAk75n_TSQpPh94	EOGT	EGF domain specific O-linked N-acetylglucosamine transferase	0.0435917991939764	6.29570473119862	2.10153159548371	0.039211870458529	0.334493369478564	-4.15650302783018
H4Cl6pShn7eU5Gh404	MRPS11	mitochondrial ribosomal protein S11	0.0405167842740334	8.82046714495495	2.10089325042665	0.0392697492911343	0.334803645654096	-4.15773251971966
Z_4AT6UXLJLrii6ipU	AFF1	AF4/FMR2 family member 1	-0.0662650342033789	4.96534781432191	-2.10048692860472	0.039306629131323	0.334934648230124	-4.15851495010831
WhXNB6IlRCkyoMiAKg	ATP2B1	ATPase plasma membrane Ca2+ transporting 1	-0.0540991361543923	5.11951249786656	-2.09961618334991	0.0393857635965822	0.33526293600898	-4.16019124717381
cqdet6d7XTuc7hXhAU	SYNGR1	synaptogyrin 1	-0.0669804328399307	4.6477355986431	-2.09958910762107	0.0393882264876943	0.33526293600898	-4.16024336168428
B1eogKZ4m6Tkrt.nu8	GTF2E2	general transcription factor IIE subunit 2	-0.0242242501301097	10.7693192683936	-2.09921706610454	0.0394220820520518	0.335304911964597	-4.16095939583502
fl9KnnaLRe_g6HAKFc	MXD3	MAX dimerization protein 3	0.0565460381311648	5.14991944725508	2.09904392425375	0.0394378464647096	0.335304911964597	-4.16129258814027
0P4XS5XhxB6A5QAdi0	SMG1P2	SMG1P2, nonsense mediated mRNA decay associated PI3K related kinase pseudogene 2	-0.0464422705786437	7.34417861887288	-2.0988251633279	0.0394577722712706	0.335304911964597	-4.16171353485861
ZX55cV.3dd690F0GL0	SIN3A	SIN3 transcription regulator family member A	0.0329251770323175	8.25909395452946	2.09809702289211	0.0395241577408699	0.335685808897907	-4.16311436879691
9kAqUtm.c.d2NUp95o	SPECC1L	sperm antigen with calponin homology and coiled-coil domains 1 like	-0.0234054652981298	9.31777152284274	-2.09737227152506	0.039590330380687	0.336064483842168	-4.16450825958047
KfUH1DPzU9vuhUSPk0	NAB1	NGFI-A binding protein 1	-0.0437034017447776	7.44756267232079	-2.09688441231825	0.0396349279150997	0.336195908232716	-4.16544630563307
utFe59eVCMeFT4FVAk	KIF13B	kinesin family member 13B	-0.0356999398780364	6.98267398646298	-2.09671706855253	0.0396502356359543	0.336195908232716	-4.16576802685832
95XSD46uCEeCLTiSnU	ZC2HC1C	zinc finger C2HC-type containing 1C	-0.0663285172026507	4.87040620193509	-2.09642193209138	0.0396772456477811	0.336195908232716	-4.16633537684779
i0KuGYneV.BaAbdXnQ	SCAND1	SCAN domain containing 1	-0.0778981747587012	4.60735842606949	-2.09606889928976	0.0397095751124062	0.336195908232716	-4.1670139308005
N6iIKOqCT5CgPufzUE	AICDA	activation induced cytidine deaminase	0.0611457141151927	6.75294603241666	2.09584052932433	0.039730500569064	0.336195908232716	-4.16745282061778
0f9f0q.7XVAUi0znnI	ZC3H12C	zinc finger CCCH-type containing 12C	-0.046568662513139	8.29054790830047	-2.09556962551818	0.0397553357816091	0.336195908232716	-4.16797339916945
NUlfA1VJ9QH4pUU3UU	TYK2	tyrosine kinase 2	-0.0269600075155404	10.5951560033223	-2.09533773672619	0.0397766049667293	0.336195908232716	-4.16841895819028
HfpVTFVBftS6JUH3Ao	RACGAP1	Rac GTPase activating protein 1	0.0480624912609458	7.99611194842793	2.09531625858275	0.0397785754730642	0.336195908232716	-4.16846022483879
9aklvNW6.DAnlmZ0UI	C11orf80	chromosome 11 open reading frame 80	-0.0406484458301725	6.75359765377806	-2.09316045124003	0.0399767904202993	0.337681961509094	-4.17260035969865
Tr__R9ef.KXowSzRTU	SMG1	SMG1, nonsense mediated mRNA decay associated PI3K related kinase	-0.0448034597542263	8.94948418012346	-2.09293264081299	0.0399977862938572	0.337681961509094	-4.17303764142446
xnrgFWCNBGfQHSVfoE	AIM2	absent in melanoma 2	-0.0399471886027377	9.32400524099829	-2.09220493374193	0.0400649185725024	0.338065394220443	-4.17443419424218
Wp2mgxd8hCRFeqhLjA	FTH1P2	ferritin heavy chain 1 pseudogene 2	-0.0670597816014044	4.96944628452914	-2.09177558709093	0.0401045723500279	0.338216675159932	-4.17525795958515
3knn2jUR7N7tNVE6tc	IL18BP	interleukin 18 binding protein	-0.0410682214636226	7.48690190657525	-2.0915304196052	0.0401272308822181	0.338224542704045	-4.17572828331146
lKFdz7VKXu_nl6KX58	MEI1	meiotic double-stranded break formation protein 1	-0.0559853332289686	5.37935346490328	-2.09034209457156	0.0402372138777395	0.338831061281135	-4.17800725369557
BCoi.5dfES6X_fkXUk	MRPS11	mitochondrial ribosomal protein S11	0.0269484295859195	9.54109836186464	2.09028269962086	0.0402427179026734	0.338831061281135	-4.17812113154629
WbS5faHtz_F5LUlzpc	DYNLT1	dynein light chain Tctex-type 1	-0.0356851350712529	8.97636902740268	-2.08955323862738	0.0403103689797387	0.339176776557199	-4.17951949446848
lT2M6FFF0neaF.6l2k	MIA3	MIA family member 3, ER export factor	0.0516174803846167	4.83375889431411	2.08935583565122	0.0403286932956077	0.339176776557199	-4.17989783860896
ZKnvriJIfiuOMvpd60	ARL6IP1	ADP ribosylation factor like GTPase 6 interacting protein 1	0.0340901532028426	10.9105176332787	2.08894079399875	0.0403672438825105	0.339176776557199	-4.18069320849594
Ey6v5_K6wp.noV75KQ	RRM1	ribonucleotide reductase catalytic subunit M1	0.0273742296967987	11.0679487938811	2.08872552127792	0.0403872517699863	0.339176776557199	-4.18110569426067
3p3cVJyBF9SEfnoSc0	DNAJC9	DnaJ heat shock protein family (Hsp40) member C9	0.0319716913414201	9.89223743163788	2.08866678626967	0.0403927122133252	0.339176776557199	-4.1812182303973
6eoV0IoMUfO8R15HAo	HECW2	HECT, C2 and WW domain containing E3 ubiquitin protein ligase 2	0.0561818937163726	6.42744426367281	2.08694171909133	0.0405533727506582	0.340342267914958	-4.18452221632394
NUyjvQU7.SKWR5ODmo	COX20	COX20, cytochrome c oxidase assembly factor	0.0325124629486067	7.41727292431294	2.08571322304975	0.0406681232979592	0.341121413525123	-4.18687366881898
foI3W9Z1SadS7A9V9U	PABPN1	poly(A) binding protein nuclear 1	0.0280280521209468	8.87934522982728	2.08499729320071	0.0407351259903445	0.341349514404517	-4.18824346267845
9lCOVOiKCnfiOuiC5c	CENPT	centromere protein T	0.0414116020152792	6.78196844318225	2.0845856714646	0.0407736922480757	0.341349514404517	-4.18903083464703
iURHRR1Sfdu1LgFXgU	ARID3A	AT-rich interaction domain 3A	-0.0323724850133285	9.20539170029833	-2.0845405651382	0.040777920336445	0.341349514404517	-4.18911710813116
6dIvrulxenMTfTV1UU	DDRGK1	DDRGK domain containing 1	-0.0314668824328445	8.62092146160719	-2.08430896643624	0.040799635460259	0.341349514404517	-4.1895600540359
luI9u8f6f97d74Rr5E	ZMYND11	zinc finger MYND-type containing 11	0.0338081983812005	8.90046223691317	2.0842523119093	0.040804949017652	0.341349514404517	-4.18966840251508
Wop4PfongqAH09QaCg	GIMAP1	GTPase, IMAP family member 1	-0.0990300102308911	4.69067319921737	-2.08366870191435	0.0408597199544654	0.341624124732072	-4.19078437207104
x5egkD3JffeQEXqKxU	ACOT4	acyl-CoA thioesterase 4	0.046495604414613	6.09956021058983	2.08275952841887	0.0409451713495806	0.341825376070214	-4.19252233207541
9LSxaCJeO4qSrqt6B8	PLEKHO1	pleckstrin homology domain containing O1	-0.0385979478434397	9.39897343672924	-2.08265207023657	0.040955281344231	0.341825376070214	-4.19272770322245
E0iXuPHULSKSSCULn4	NSMCE4A	NSE4 homolog A, SMC5-SMC6 complex component	0.0246273022180155	10.1586385113577	2.08250478458525	0.0409691419396447	0.341825376070214	-4.19300917642318
feKq_ujPqQpKAXeiF0	PMVK	phosphomevalonate kinase	0.0378415582092429	8.23978551070996	2.08232873023476	0.0409857151954886	0.341825376070214	-4.19334560568531
3eOOFH3U_u6nVl6Ot8	TARBP2	TARBP2, RISC loading complex RNA binding subunit	0.0424229520881422	5.91145536034756	2.08221194460651	0.0409967122637382	0.341825376070214	-4.19356876220688
ZRflO1Ge_tAVd7Tl38	FAM53B	family with sequence similarity 53 member B	0.0411642201399126	6.42705808433019	2.08201214722067	0.0410155320207579	0.341825376070214	-4.19395051391272
WR5I5rReHhRer.c8Us	CACNA1E	calcium voltage-gated channel subunit alpha1 E	-0.0613978525686586	5.93037184540605	-2.0815332040055	0.0410606761492042	0.34193021577572	-4.19486549692734
3DF8Gqe5mKIk1HkLa0	MRPL43	mitochondrial ribosomal protein L43	0.0549254569434329	6.89805944003398	2.08080402635878	0.0411294894005298	0.34193021577572	-4.19625817792003
WV_hIIelxckhej.314	TMEM268	transmembrane protein 268	-0.0413750565372386	7.04236886626078	-2.08060285653028	0.0411484915630687	0.34193021577572	-4.19664232352539
ZuAS_EhNFL4feTwXk4	GAR1	GAR1 ribonucleoprotein	0.0363106971443508	8.09367100145574	2.08044316226857	0.0411635814226271	0.34193021577572	-4.19694724586965
upX3V5dDcAkuURXUC4	CAMK1G	calcium/calmodulin dependent protein kinase IG	-0.075372411057961	5.59201986435443	-2.08035004796795	0.0411723822062943	0.34193021577572	-4.19712503006264
6qWqKrX_a4nO.E_ES4	GALNT2	polypeptide N-acetylgalactosaminyltransferase 2	0.0565784782933117	4.85557504712263	2.08024913508658	0.041181921918561	0.34193021577572	-4.19731769628151
Bm5y6jpI4oIIVRv4oI	TAF13	TATA-box binding protein associated factor 13	-0.0611359238286871	4.9277452480515	-2.08022942247038	0.0411837856570518	0.34193021577572	-4.19735533130335
0EgReqeagSXmxp3TQc	LMNA	lamin A/C	0.0543986319294043	7.93310776510699	2.08001755931956	0.0412038209657792	0.34193021577572	-4.19775979737422
f_zTOMN_R_Hi_oQp9E	THAP1	THAP domain containing 1	-0.054495233997083	5.81636156006577	-2.079134375145	0.0412874321293277	0.342441525513784	-4.19944548657625
TkP3eiOFyDkigyXXdU	CT45A5	cancer/testis antigen family 45 member A5	0.121076628472945	4.80098659268262	2.07848485391585	0.0413490160377899	0.3427032709319	-4.20068479366988
Hua3qUtEKD7vtwlAqo	PXDN	peroxidasin	-0.114606311320835	4.46963184192417	-2.07833730526191	0.0413630168345992	0.3427032709319	-4.20096627375419
HLULkKF4IAp9GeVJ5o	NEK2	NIMA related kinase 2	0.0482890012898786	5.62139758579998	2.07805886564477	0.0413894489642752	0.342739862487147	-4.20149740804198
QtrSHfq7u_3u61_Lq8	GNA12	G protein subunit alpha 12	0.0498432560799945	5.05212463834946	2.07747539427344	0.0414448850011372	0.342902727813326	-4.20261019932425
9XYldJRCxroRJJTuEA	EML2	echinoderm microtubule associated protein like 2	-0.0435392746051824	6.8845714166357	-2.07738826296299	0.0414531689198793	0.342902727813326	-4.20277635179928
Tld5ZCAS7iceUZ4AcU	MRPS7	mitochondrial ribosomal protein S7	-0.0273807313070845	8.88241759725246	-2.0770214707532	0.0414880570166724	0.343009066189886	-4.20347572819832
QJE7xf3_4pDoutyj4k	ZNF514	zinc finger protein 514	-0.0654175748570555	5.11716586417117	-2.07647143764531	0.041540422003065	0.343149446085629	-4.20452429344455
f3TS1d16J6q1ETdUlA	TNFRSF10C	TNF receptor superfamily member 10c	0.064682598576102	4.60761304448045	2.07638012957395	0.0415491203668686	0.343149446085629	-4.20469833656246
cUnrw4bcJcudydCIXc	ERCC6L	ERCC excision repair 6 like, spindle assembly checkpoint helicase	0.0511553973281861	5.78898533731662	2.07565307207849	0.0416184389426947	0.343539691124004	-4.20608394720908
0xmuhxiF_GaW93oZac	MRPS34	mitochondrial ribosomal protein S34	0.0450306493592843	6.47013583478603	2.07526586835882	0.0416553962361548	0.343662537681218	-4.20682169771724
KeS7W84uUAN7fgpJxE	RGS2	regulator of G-protein signaling 2	-0.0542376135109691	9.69055071708596	-2.07489455723568	0.0416908632917792	0.34377296595679	-4.20752905395634
6R3lXR9fypAwRJIFG4	TMEM150A	transmembrane protein 150A	-0.0498394127058715	5.71469216432199	-2.07345168567128	0.0418289321550006	0.344204507510236	-4.21027670116197
BquVEBXuVUv3n96d58	C19orf25	chromosome 19 open reading frame 25	0.0431699243327456	5.56695104851108	2.07342930934444	0.0418310764629209	0.344204507510236	-4.21031929896514
9jpCddAlL7AMrVeXrE	FBXO5	F-box protein 5	0.0302442640211176	9.19432367193382	2.07336664042432	0.0418370824880812	0.344204507510236	-4.21043859960848
o10FHdcd_l_BcXer6M	BTF3L4	basic transcription factor 3 like 4	0.0333255165591775	8.1680504167259	2.07327973353813	0.0418454126504338	0.344204507510236	-4.21060403597778
3OSQ_i0cbRa55fd41I	HACD3	3-hydroxyacyl-CoA dehydratase 3	0.0461237944708632	7.38012259477201	2.0731927983252	0.0418537469628004	0.344204507510236	-4.21076952016974
up3zolei__pCjntP.4	STIM1	stromal interaction molecule 1	-0.0445456619390968	6.87911863631365	-2.07288558212604	0.0418832106907377	0.34426495461109	-4.21135426797787
H0knv6XD3yTz.tf5lI	SEPHS1	selenophosphate synthetase 1	0.0445205062113372	7.89912826481129	2.07217483522226	0.0419514439868698	0.344643841682105	-4.21270679420071
Nu0_SCHeImkJINeuEk	IL10RB	interleukin 10 receptor subunit beta	0.0539934873199801	8.03346379584153	2.07183560248668	0.0419840449585475	0.344729753119551	-4.21335219830119
uf6N444ooC4IJAinCo	EEF1B2	eukaryotic translation elongation factor 1 beta 2	-0.0749227508223488	4.81391085748784	-2.0714658163016	0.0420196071288698	0.344839875478252	-4.21405562572647
rREnB5QDE_FssnvQdc	ABCC4	ATP binding cassette subfamily C member 4	-0.0456787429660155	7.70674856129115	-2.07019974406613	0.0421415620047552	0.345480337664597	-4.21646318098601
061H1G05p4aHZ717q4	PSMG4	proteasome assembly chaperone 4	0.0380491006597309	8.1466509666352	2.07019486625442	0.0421420324527923	0.345480337664597	-4.2164724540995
lcvpyUw9dX79j5S8gk	C11orf54	chromosome 11 open reading frame 54	0.0409998394955802	7.71486341847078	2.06962362869325	0.0421971577404789	0.34575018510725	-4.217558289858
TIGX_MSntT5Sgin7ls	ANKRD20A1	ankyrin repeat domain 20 family member A1	-0.0826495569274936	4.51588257984659	-2.0687671639642	0.0422799246510761	0.346246116237745	-4.2191858051945
fnnsEqHJEhEaOLqtP0	CD86	CD86 molecule	-0.0538963749920845	7.33807692960512	-2.06820653933296	0.042334178155755	0.346508141708094	-4.22025082315036
E7Kr3rjrrF3zxfOwBE	RWDD4	RWD domain containing 4	0.0267925588298273	7.88314151380256	2.06679418028349	0.042471123593068	0.347358598871552	-4.22293275410265
EuDnMgPkqi1AqeZ91Y	SNORA14B	small nucleolar RNA, H/ACA box 14B	0.0640557671356662	4.7582398481087	2.06655137476329	0.0424947050677831	0.347358598871552	-4.22339365551093
iFGqIV01eVe7p5kLPc	SAMD10	sterile alpha motif domain containing 10	0.0540899952121217	5.06178477221603	2.06622656758691	0.042526268299973	0.347358598871552	-4.2240101406449
TrknS6COOEFIITicKs	PRPF4B	pre-mRNA processing factor 4B	-0.0472129592255477	6.58298427188947	-2.06621563501252	0.0425273310283388	0.347358598871552	-4.2240308892251
Tt5huq2hqZcdZqzRSc	HCG4	HLA complex group 4 (non-protein coding)	-0.0376535448260372	10.275191145245	-2.06544285202502	0.0426025094972817	0.347693333223186	-4.22549728433271
T5I4jUr6f6WrKQkfeo	PHYKPL	5-phosphohydroxy-L-lysine phospho-lyase	-0.0564606089794926	5.04970290707621	-2.06533531122252	0.042612980459265	0.347693333223186	-4.2257013102203
xaopZJF96CH6X1neGQ	H2AFX	H2A histone family member X	0.0522893054922208	6.81710962127297	2.06470307236127	0.0426745848442261	0.348013586618602	-4.22690060164194
Huik7on8xASpIFEggY	PFDN4	prefoldin subunit 4	0.0573783150439229	4.80756786994508	2.06442538671787	0.0427016664131357	0.348052116607171	-4.22742724030446
9TNQvR3t9eJLoI0z54	TRAF5	TNF receptor associated factor 5	-0.0368748314125959	7.93310526527468	-2.06413682810795	0.0427298241062768	0.348099372939046	-4.22797443379481
BSfWW6YTT4rXomVIVU	GRAP	GRB2-related adaptor protein	0.058613817636892	4.71665409548889	2.06375459836199	0.0427671469666678	0.348119073362521	-4.22869915212889
EqrVGITocovwkoS7m4	CTDP1	CTD phosphatase subunit 1	0.0449435675269727	5.8236189184505	2.06365410056588	0.042776964757355	0.348119073362521	-4.22888967915721
HJyl3jTIJIyfS1S3KU	CSRNP2	cysteine and serine rich nuclear protein 2	-0.053241198883023	5.70198940523594	-2.06248636567663	0.0428911854446385	0.34838395051977	-4.23110291050803
il313gyFIZX9Hy9LlI	ATP2B4	ATPase plasma membrane Ca2+ transporting 4	-0.0864892879503953	4.26691086874541	-2.06229487060477	0.0429099414375938	0.34838395051977	-4.23146574969359
NF3.BKJeJEK.Dignqk	TOPBP1	topoisomerase (DNA) II binding protein 1	-0.0376823680379911	9.01788483628925	-2.06212108988324	0.0429269685277731	0.34838395051977	-4.23179499857934
x_JRky7RkXuNUnHyis	CCNB1IP1	cyclin B1 interacting protein 1	0.0305764154294322	9.82260794396434	2.06188526212264	0.0429500843377077	0.34838395051977	-4.23224176411819
9kYHoe7kGf.qIOO1W8	LDLR	low density lipoprotein receptor	-0.030196492671178	10.1257542612615	-2.06165113521461	0.0429730440625074	0.34838395051977	-4.23268526296001
riguY2oF1zMfW.l2a8	RPL36A	ribosomal protein L36a	0.0392502565681941	7.42183177847212	2.06151904022908	0.0429860026725961	0.34838395051977	-4.23293546654473
0dJ5Kke76gFPp6l.ig	CTIF	cap binding complex dependent translation initiation factor	-0.0459019920515279	5.03987551813586	-2.0615093193598	0.042986956429923	0.34838395051977	-4.23295387846753
ZX5zBVd5967uGKVWO8	PALM	paralemmin	-0.0599374027461594	4.50665439705343	-2.06139791806769	0.0429978878063524	0.34838395051977	-4.23316487389138
0RUF6Pcte7nnF7ueco	FSD2	fibronectin type III and SPRY domain containing 2	0.0701797994685551	4.79606745797063	2.06126517186631	0.043010916810059	0.34838395051977	-4.23341628372673
6SB56mDeJFB5F0UhKA	SDCCAG8	serologically defined colon cancer antigen 8	0.0480712297513256	5.7876801333844	2.05904473726692	0.0432293577963085	0.349971212778435	-4.23761948102346
cXSzdLnukydQyu57rk	LRRC8B	leucine rich repeat containing 8 family member B	-0.0363626796643852	6.58774184031518	-2.05873150718747	0.0432602495635369	0.350039275054648	-4.23821209238027
QfpyF_.4o.xCF.smPI	PAPSS1	3'-phosphoadenosine 5'-phosphosulfate synthase 1	-0.0373203387000983	6.44223531408348	-2.05846577251107	0.0432864721187889	0.350069505426133	-4.23871478319408
HKXUQKXpISK3T1JeHc	CCDC24	coiled-coil domain containing 24	-0.0430805450988	5.73584626561208	-2.05739799164559	0.0433919785384689	0.350714603182325	-4.24073413003852
rd0pVEHx9eT.BCNVCo	OSGIN2	oxidative stress induced growth inhibitor family member 2	-0.0346213949449852	7.33157518525373	-2.05700955456466	0.0434304146590231	0.350714603182325	-4.24146849860112
NrrjoA7qEkgn84jrNM	RECQL	RecQ like helicase	0.0567669186892356	5.75772449730292	2.05680269100849	0.0434508959407271	0.350714603182325	-4.2418595393502
opEnnSQutKlCp5C4Pc	RAB12	RAB12, member RAS oncogene family	-0.0738101066584712	5.7321332473166	-2.0565749574241	0.0434734531748177	0.350714603182325	-4.24228999130635
6S5_kXoLK6SO8GV9dU	TPP1	tripeptidyl peptidase 1	-0.0317250597059606	8.38899024896999	-2.05652019720796	0.0434788787347049	0.350714603182325	-4.24239349038354
odKX6SdAS0L95fdeuk	SPATA31B1P	SPATA31 subfamily B member 1, pseudogene	0.0480622211655722	5.19981807852642	2.05589673220104	0.0435406919215513	0.350876114018772	-4.24357169386705
9pUFj9TDskvFu9F0Rw	TMED5	transmembrane p24 trafficking protein 5	-0.0335957534326372	10.1809772244206	-2.05586360748567	0.0435439781785887	0.350876114018772	-4.24363428304851
93b3M3TRJlJXv.JaAo	PPP2R5E	protein phosphatase 2 regulatory subunit B'epsilon	0.0304091832660799	9.83754730457773	2.05456132281084	0.0436733457580092	0.351736495996216	-4.24609424693166
rSnv1Q7QvPKsh1KK6g	LDOC1L	leucine zipper down-regulated in cancer 1 like	-0.0447706204921482	5.4686907048499	-2.05411280102381	0.0437179781451617	0.351875628526198	-4.24694116868442
3VtUR5VU.ixFkQtAZw	ZHX2	zinc fingers and homeoboxes 2	-0.0273636517401176	7.05323183965934	-2.05362015932446	0.0437670462466516	0.351875628526198	-4.24787121210163
i0JcuwP3k3RGH8v6Uo	RASGRP1	RAS guanyl releasing protein 1	-0.0515588526814925	7.62594777763692	-2.0529785859328	0.0438310194649519	0.351875628526198	-4.24908212439012
0kCUyCe6eVKkKUILgo	PGAM4	phosphoglycerate mutase family member 4	0.0431033945609628	10.0518296039596	2.05280025623784	0.0438488155769214	0.351875628526198	-4.24941864647485
rOhknHeFxhHda.ni.g	ATG4B	autophagy related 4B cysteine peptidase	0.0390200090318096	7.82785556712068	2.0526164830316	0.0438671614356907	0.351875628526198	-4.24976541393031
olJVl5X12UWp53rdto	SYPL1	synaptophysin like 1	0.0425808308602797	6.89742010765508	2.05227298964612	0.0439014697220664	0.351875628526198	-4.25041348904472
NofVooocavoYjOEXCg	TBCB	tubulin folding cofactor B	0.0337757485579295	8.72591074182692	2.05223458329408	0.0439053072053786	0.351875628526198	-4.25048594505308
Tefp3cROk.SrMI7JP0	SNX4	sorting nexin 4	-0.0305183091326166	8.64882737010967	-2.05187299737878	0.0439414503097349	0.351875628526198	-4.25116804111004
roa1X1.Td6Xv496SSU	MCTP2	multiple C2 and transmembrane domain containing 2	-0.0824626513176285	4.55737386927988	-2.0517145674614	0.0439572945993707	0.351875628526198	-4.25146687009119
fkXmSMiEN8Vkr.SNyg	CASP6	caspase 6	0.0485618502834017	5.34241167802309	2.05147026580459	0.0439817364239404	0.351875628526198	-4.25192762964815
6C.uqlAXqFWJ9drJIo	FUT7	fucosyltransferase 7	0.133481866650707	4.90738408626144	2.05139607936444	0.0439891609281575	0.351875628526198	-4.25206753771327
lgiQKueA4fsa_nrn90	KLHL42	kelch like family member 42	0.032077358090374	7.29933574101603	2.05084313535997	0.0440445330685224	0.351875628526198	-4.25311019321592
TDqner15e6Xt7XXVw8	GJC2	gap junction protein gamma 2	-0.066151994447501	4.60009478755627	-2.05083207657102	0.0440456411150501	0.351875628526198	-4.25313104362628
0J3RdiEXVIVRNV0gZ4	KRI1	KRI1 homolog	0.058059375053993	4.91821033426364	2.05081266265924	0.044047586369693	0.351875628526198	-4.25316764667365
EToZPUgC6QiOLf111I	TCHP	trichoplein keratin filament binding	0.0538697714324696	5.72761408850315	2.05072937640242	0.0440559324104943	0.351875628526198	-4.25332467136473
6u7FOec_031_D3_bqk	MFSD14B	major facilitator superfamily domain containing 14B	0.0493794330521192	6.32503699804027	2.05021222857505	0.044107785859174	0.351875628526198	-4.25429955604359
EnrersnfIoKIyoAqnU	RAD54L	RAD54-like (S. cerevisiae)	0.0425340930802969	7.39473793822132	2.05016826792887	0.044112196137322	0.351875628526198	-4.25438241705086
W5UMd_VNdn55XKO13s	UNC45A	unc-45 myosin chaperone A	0.0344227950789347	7.65743518997587	2.04971685774846	0.044157505112179	0.351875628526198	-4.25523318519712
indenl.07J0nOkVU4E	GPR19	G protein-coupled receptor 19	0.0563599981308365	5.65084888131541	2.0494650831516	0.0441827936788214	0.351875628526198	-4.25570763043318
HqXS3ouoyiS4uECXeA	SMO	smoothened, frizzled class receptor	0.061776920453145	4.65349737979453	2.04916396844531	0.0442130544275303	0.351875628526198	-4.25627498491153
WLF_H_9Ek7KuOJHRD4	CA2	carbonic anhydrase 2	-0.0340231353914221	7.30814211685303	-2.04896011495228	0.0442335509803362	0.351875628526198	-4.25665903996819
61y9X3AHyChW16gIG0	ZNF670	zinc finger protein 670	0.0612783695664686	5.20075190527974	2.04887423902599	0.0442421878711684	0.351875628526198	-4.25682081805143
9XmkEbkV4ohK6S42cc	RNASE4	ribonuclease A family member 4	-0.0783015656809179	4.36670155854661	-2.0488017761862	0.0442494768844633	0.351875628526198	-4.25695732312737
ZVChN4dVxd.O3lS7Po	POLE2	DNA polymerase epsilon 2, accessory subunit	0.0435063249108169	8.15077339869338	2.04809842629403	0.0443202804348489	0.351875628526198	-4.25828206831324
iHq69UeThXc1eU3tVM	ABHD4	abhydrolase domain containing 4	0.048516780592911	5.23956408367926	2.04802064623695	0.044328116251037	0.351875628526198	-4.25842854082966
WjeKKfbqf_rXcHKHV0	NDUFB8	NADH:ubiquinone oxidoreductase subunit B8	-0.0237065754063619	11.7653548505567	-2.04779015411655	0.0443513437919261	0.351875628526198	-4.25886256622213
uimrUjYJJ0O1I77rJ0	GEMIN2	gem nuclear organelle associated protein 2	0.0381632460389109	7.57122608376431	2.04767108079287	0.0443633473596894	0.351875628526198	-4.25908676892115
iX.S35VIr1dD9JJFiY	CNOT4	CCR4-NOT transcription complex subunit 4	0.0484668956648658	4.88377672183612	2.04748550780049	0.0443820602231306	0.351875628526198	-4.25943616066182
HXu47V4pIIlqh46vSs	CNPPD1	cyclin Pas1/PHO80 domain containing 1	0.0387570149879867	6.75965756019226	2.04747946650429	0.0443826695314637	0.351875628526198	-4.25944753457917
ipSSBSVQlJF.rAwJJM	ATP13A1	ATPase 13A1	-0.0390895909545752	8.23217077145713	-2.04735165114046	0.0443955623239041	0.351875628526198	-4.25968816497015
ZdHHmv5e5ehDimiUe8	LRBA	LPS responsive beige-like anchor protein	-0.0326225266475624	8.54996113419234	-2.04726033249716	0.0444047756532034	0.351875628526198	-4.25986007703839
326SBok0lIV77qb7TQ	MAST3	microtubule associated serine/threonine kinase 3	-0.0395222150723174	7.6684004017233	-2.04716990245256	0.0444139009541354	0.351875628526198	-4.26003030960803
QRHZU.3C6.IK_S3l0U	EXOC5	exocyst complex component 5	-0.0380607243238684	5.99314162425538	-2.04641364879737	0.0444902778610143	0.352301447477249	-4.26145368077888
EqKS7TAsALu6l_i3CI	POLH	DNA polymerase eta	0.0532381627057894	5.302573617562	2.04583169448576	0.0445491286742789	0.352588121607104	-4.26254868123811
6LJP1cU0JT7.uU9KIo	ICK	intestinal cell kinase	0.0413711858100569	6.27330756159433	2.04496026637031	0.0446373783191806	0.353089173326597	-4.26418783943989
fXl3eKMCQ9P91RXaV0	KHSRP	KH-type splicing regulatory protein	0.0374278053995301	9.69743070133686	2.04469156448154	0.0446646201684876	0.353089173326597	-4.26469314399074
9i6p9OFO5NIPl6LuR4	ZNF544	zinc finger protein 544	0.0265174268828661	9.08628005574873	2.04451562978401	0.0446824647464949	0.353089173326597	-4.26502396442159
BnaDuFKSokuE6CSM6U	PHF14	PHD finger protein 14	0.0359244535734142	7.54841805792129	2.04431168697226	0.0447031577997638	0.353089173326597	-4.26540741873246
6iT.9O5SJex6KVU_5E	CLEC4A	C-type lectin domain family 4 member A	-0.0617884659138887	5.42101916063033	-2.04335148062784	0.0448006961244975	0.35368014060151	-4.26721234997174
Zk4oFL4Tnq_4ekn8kk	ASAP1	ArfGAP with SH3 domain, ankyrin repeat and PH domain 1	-0.0428453947080383	7.38254928277254	-2.04251772638741	0.0448855380561516	0.353978767180119	-4.26877897802835
cuJRM_ovcj_Lg6SgKk	TRIT1	tRNA isopentenyltransferase 1	0.0404778078126028	8.23467796467459	2.04240882952861	0.0448966294971722	0.353978767180119	-4.26898355406199
KUgujoiAxSAoFKta_Y	MRPS28	mitochondrial ribosomal protein S28	-0.0308790269972586	9.26656228407102	-2.04230962361629	0.0449067359442918	0.353978767180119	-4.26916991609028
3kilwKHt9e63vp73qE	SNORA2C	small nucleolar RNA, H/ACA box 2C	0.0721084888294583	4.50824332886601	2.0419263215885	0.0449458026567605	0.354107416882818	-4.26988988825475
oLp5.f_uFdSq6DaLu0	ZDHHC14	zinc finger DHHC-type containing 14	0.0682937203338177	6.65486572289452	2.04142131891656	0.0449973179759755	0.35413975267608	-4.27083827369827
BJFL1tPdvXqgVUd4Xs	BCKDK	branched chain ketoacid dehydrogenase kinase	-0.0284642943480725	10.4286062064345	-2.04130795723622	0.0450088889881211	0.35413975267608	-4.27105113632599
fSNW1AuXVOXFFNNE1U	PPP1R13L	protein phosphatase 1 regulatory subunit 13 like	0.0628163552335191	4.91064570742237	2.04121723767109	0.0450181507288003	0.35413975267608	-4.27122147565811
BIkCRNSiVS_0eS3qQU	SMG7	SMG7, nonsense mediated mRNA decay factor	-0.046182647018658	5.93573802980305	-2.04026415933861	0.0451155516534139	0.354595281879071	-4.27301061654166
rQvx197.i.7JLsVGeo	ZMYM2	zinc finger MYM-type containing 2	-0.0420055923652763	7.8867301190885	-2.04005316399404	0.0451371390857886	0.354595281879071	-4.27340660219244
Tld2bA_gXXXsCSkif4	BCAR3	breast cancer anti-estrogen resistance 3	-0.0510016114240942	6.35080439152046	-2.03998232244271	0.04514438904704	0.354595281879071	-4.27353954601239
3Z15RdPP_T4IxPlK_4	COMMD10	COMM domain containing 10	0.0280039575635012	7.91424449885444	2.0384819044351	0.0452981783533125	0.35562382279595	-4.27635432729613
ltOll5e09eHRRbVSuA	IMPDH1	inosine monophosphate dehydrogenase 1	0.037184194443506	8.53573617646275	2.03772083471129	0.0453763585164733	0.355648048218965	-4.27778139351968
9VulXlXdcd3ukv0z_c	U2AF2	U2 small nuclear RNA auxiliary factor 2	0.0221954727093078	10.0122094326434	2.03764879478091	0.0453837647654393	0.355648048218965	-4.27791644973345
rVUch7idfipSh83e9k	ATPAF1	ATP synthase mitochondrial F1 complex assembly factor 1	-0.0324132927812111	7.25954237104352	-2.03738155382898	0.0454112482468925	0.355648048218965	-4.27841742047626
NirqREVJpeSLCfPFRA	NKIRAS2	NFKB inhibitor interacting Ras like 2	-0.0301207669135554	7.15784827925214	-2.03736946012998	0.0454124923208448	0.355648048218965	-4.27844008999057
Qi6f1J4ODXO3ZuSuvo	MAP7D2	MAP7 domain containing 2	0.0782316878105705	4.86118183166257	2.03716190363497	0.0454338481480808	0.355648048218965	-4.27882913398177
rkP35BRRYpVgCR620o	DMKN	dermokine	-0.0725583984370553	4.77125303560831	-2.03711832634544	0.04543833298481	0.355648048218965	-4.27891081082721
BXKl.7o_EstV1sonRI	ACP1	acid phosphatase 1, soluble	0.0298148918615796	9.01769023501976	2.03512691555435	0.0456436897855423	0.357075860593629	-4.28264166221033
rKSYUZKIG6XooIHo68	UQCC3	ubiquinol-cytochrome c reductase complex assembly factor 3	0.0496091212510871	5.83101945246037	2.0342586001246	0.0457334813878827	0.357598612881245	-4.28426741722369
xqTKEmk0a_T1T6HTkU	ETV5	ETS variant 5	-0.0297892142324636	6.87249834829532	-2.03378273461475	0.0457827546091999	0.35771510866627	-4.28515812460072
l6eNE0iK3m6S.qntG4	KCTD2	potassium channel tetramerization domain containing 2	0.0482580178031732	5.5156601498567	2.03367095610024	0.0457943352756858	0.35771510866627	-4.28536732076627
EeFAk7.CeQ5LLRq6wU	SLC33A1	solute carrier family 33 member 1	-0.0401746401880368	7.85754542211154	-2.03265749107594	0.0458994490905698	0.358356380863586	-4.2872635811583
rXg2T3ceh3pefoiukk	PSRC1	proline and serine rich coiled-coil 1	0.0474684824347623	5.45489909449171	2.03209468813355	0.0459579110828234	0.358460966141652	-4.28831626213055
TcDRU6etSjEingHeHo	FBXO4	F-box protein 4	0.0413660913296464	7.10448342573114	2.0320852145802	0.0459588957103506	0.358460966141652	-4.28833397950158
957o3fwK16Bf4l0vF0	BRWD1	bromodomain and WD repeat domain containing 1	-0.0425116904144535	7.09555874236737	-2.03176505521722	0.0459921819367927	0.358540955629438	-4.2889326963098
xlLNEzp6SaEQqs36x4	CASD1	CAS1 domain containing 1	-0.0400147127776284	5.3596186768503	-2.03096555381687	0.0460753948332	0.358864950955956	-4.29042744680183
W50_lnu9NQqr3VILio	TRPC4AP	transient receptor potential cation channel subfamily C member 4 associated protein	-0.025890236648479	8.47713999828803	-2.03092282588631	0.0460798456424047	0.358864950955956	-4.29050731644663
[truncated: 13,569 more rows]
