# Supplementary material for: Integration of genomics and transcriptomics predicts diabetic retinopathy susceptibility genes
Source: eLife. 2020 Nov 9;9:e59980. doi: 10.7554/eLife.59980 (PMC7728435; doi:10.7554/eLife.59980)
Supplement: Figure 1—source data 7. [file elife-59980-fig1-data7.csv]

	geneID	inter-individual variance	intra-individual variance	F-value	p-value	CV
3iUZ.47hLFki49VR4o	MLLT10	0.0641895601454403	0.0139541282016157	4.6000408780828	9.99847834187834e-06	0.0222126515887254
fEn1QlU0MCVe9GeR64	C1orf123	0.0507389514157915	0.00670565542881693	7.56659091037479	9.99725934863765e-09	0.0171699703563281
ud_tTlU5LtB478JxIk	FSD1L	0.309969605174559	0.0268224131298236	11.5563653305268	9.99677156668727e-12	0.0639120898112883
3KV3OJIIRuJ5KJ6VkI	TXNDC11	0.770968723018532	0.0281259874116609	27.4112589092211	9.99351757909546e-19	0.0687930580436548
o_rupcEAKnQqnoh6ec	CYB5R2	3.52087986051386	0.0339111298432289	103.826675100207	9.98720838466585e-31	0.135716192423497
Nk_t6ULcQ7VDNChBRU	GBP1	1.10050400833304	0.0952219779700141	11.5572479357612	9.98361462372843e-12	0.0772800100120539
oh1UuQKqlI97u.dwXc	DACT3	0.802896777593816	0.0418221184742224	19.1978983104046	9.98136746833467e-16	0.107956668013413
oV6Se3UijQJRFQIsKQ	STEAP2	1.05213686854323	0.0548045705618412	19.1979766971443	9.98059531929375e-16	0.137337782460121
Qh7hLhw1VzhVAlePA0	ALDH7A1	2.8356591284186	0.0421398487622983	67.2916304093527	9.97557929624732e-27	0.138691649050042
ooJDr0pIoJp54jxygk	NOP56	0.16085131892047	0.0425605185600124	3.77935524196355	9.96981125720117e-05	0.0262026066175137
Q7voIjrjqXqb.vvrfY	ANG	0.348622982871894	0.0922430580284881	3.77939533145385	9.96864431854791e-05	0.0798421663014418
01QpEiEak1_HU2pn38	MBP	0.201458203070159	0.0533043220515134	3.77939715423956	9.96859126363167e-05	0.0620781820564598
oRUZkfEYghPTp.qSCg	PDLIM3	1.64570367055607	0.0476920737181121	34.5068591540628	9.96748101746603e-21	0.176723615538749
xQwSlQl7rOO5EfnIdI	GPNMB	0.318476427396301	0.0420814626878789	7.56809309976847	9.96695429310142e-09	0.0717485747537154
HU33xEiKSeKShLqnB4	GOLGA2	0.187540927920047	0.049618936885257	3.77962406477455	9.96198897121952e-05	0.0484124346054139
okB2FVvXlSMOnQwd4o	INPP5B	0.107418579112217	0.0284204391521012	3.77962418305121	9.96198553096691e-05	0.0350174372659067
rSCAiQVFAXBChVYEf0	CDK2AP1	0.206218203383631	0.0121421450344578	16.9836715669605	9.96170059394169e-15	0.0244513693303022
uSRSDoSRCU6CVI6dLg	COPS4	0.0815035490206216	0.0107689237942707	7.56840243070371	9.96072578054409e-09	0.0202809806743755
x36AJeiCeqI5r0Q5do	IFFO1	0.120021937410661	0.0185123819196541	6.48333304334201	9.96053943543301e-08	0.0261781741049803
KAF1Jfd7vvWExYoUHo	SLC47A1	3.2874482694105	0.134799491420878	24.3876904486699	9.95938486089519e-18	0.248270854686418
Ke0eei_UvR3SAAyWEk	NEDD1	0.117237622235479	0.0133728568587031	8.76683445236914	9.95665711660008e-10	0.0347375624095274
cLUrM9S6.fHiL01y1U	FLJ41455	0.634737846484569	0.0838619596845958	7.56884109162024	9.9519001129644e-09	0.0910389489802335
9CFClE9T4UidJRmURc	LINC00158	0.62473624762564	0.0473829246590987	13.1848393091049	9.95118119726455e-13	0.0595817429013916
936Se__l1.A9x8Xi9I	MON2	0.215413099487358	0.033223076031257	6.48383970480917	9.9492955970474e-08	0.0369184356304176
on_s959RO5S_Xo_olM	GLDC	0.855674190561413	0.050378296467517	16.9849766776679	9.94747773132029e-15	0.0595740076403372
3q3rFfkoX_yvuoALZI	SYTL2	1.12415094221347	0.0661843439996083	16.9851489684649	9.94560172334703e-15	0.146948150338544
oiWI0YR5HUnu4SDiFM	DOPEY2	0.276219739196901	0.0315050586443291	8.76747262448345	9.94504606471352e-10	0.0480975710730425
BvwUf55wj.ltU9U..U	SPRED1	1.57271267531319	0.0260743456670037	60.3164771763921	9.94154533705848e-26	0.12006787730181
ovvJ5I8FUlXe33vCxI	KIFAP3	0.210513769415278	0.0086310606120701	24.390255019283	9.93893790616234e-18	0.0303189931697299
Q1QkESFHfVflXVUioc	ARFGAP2	0.067609595711269	0.0178836330034789	3.78052914070182	9.93569941445781e-05	0.0232720958077143
fIB26Kp7Wd666G8L2g	TYMP	0.439699761220378	0.0580848808692864	7.56995201918161	9.92958519966283e-09	0.0830327684833008
3REwfFXXzB9wEK9dUs	TRIM78P	0.105555766509215	0.0229331981221714	4.60274951390953	9.92599809045013e-06	0.0371954073639541
oXcV9m5.t6gt.6VTtI	CTPS2	0.142498428111843	0.0162506293601135	8.76879442353163	9.92104187292424e-10	0.0292866007187526
Eurjl.9.wlSxMzzl5c	STK26	0.106480638240847	0.0231330608191955	4.60296365764493	9.92029114573117e-06	0.0251156565759563
HVE9Hnh6fR6DK9K0Wo	EXOC2	0.0798630867812464	0.0145198053327404	5.50028632967722	9.91659039724192e-07	0.0277324854397345
3kqjw9SS1eNMXA1ETk	ZNF799	0.107975052304931	0.0196302801460152	5.50043359044211	9.91301031761058e-07	0.0453599943091929
ZKBXf11nSI559PxUoo	CNTNAP1	0.823568246400851	0.0300322869423152	27.4227616425857	9.91086184989645e-19	0.0629010454656829
r6LcBqko3uUAiXd1os	WHAMM	0.434646664908063	0.0944192485429151	4.60336924531346	9.90949154146037e-06	0.0773146310074224
NM7rXb025Ze645uS4Y	SYN1	0.850799531052847	0.0348767607570966	24.3944538593576	9.90555582989718e-18	0.114858033520287
3LJ1F4IqOgXerSgEno	SMCO4	0.687143709608563	0.0250562607195668	27.4240325521502	9.90177335624454e-19	0.054131313845005
3984BKesiiv3iXJUKk	PRMT6	0.340690028687754	0.0619330452597382	5.50094101232951	9.90068460268414e-07	0.0512355327128356
6qOXOeelwBRHSAYoXI	STARD13	1.27793327829716	0.0211828851156792	60.328575230352	9.89984795550051e-26	0.103295396754445
6UweKIQyXqh5OzVEo4	GFOD1	0.308471080169714	0.026676312822911	11.5634826378548	9.89118792232059e-12	0.0648871604835638
rF.0Kez6_i7IeB5eq0	FCGR2B	0.669888328601155	0.0244249613532164	27.4263823354194	9.8849925872656e-19	0.070456680671062
3.orDPq_D3h5V.cnoU	RPE	0.14876795927353	0.0270409107153522	5.50158834661838	9.88498344174947e-07	0.0322790217768605
N0_ivqCguKIC7378u8	HECA	0.205555737897476	0.0543468483916275	3.78229361924036	9.88465298412104e-05	0.0678031668230933
HCOEKKtF67lo2mPp1A	CLK3	0.160963359981646	0.0425563362961092	3.78235943201629	9.88275427158526e-05	0.046737162381567
WKgj5UpR4SiY1XDoxU	UBR7	0.624085537823031	0.0288023920869496	21.6678370303071	9.88194673050074e-17	0.0592603305224799
oXrp3_6KAcBPV_Ot0I	ANXA1	2.86048224782624	0.0828591950837123	34.5222065569948	9.87825183296486e-21	0.158316664241088
xbRJ.Xq__Jdwjrf9d4	TYMSOS	0.375860090269138	0.0325009485594931	11.564588325203	9.87489012263165e-12	0.0471499582297779
up.x3430CkZKvw69fo	NLGN4X	1.42568254374939	0.0950891578082393	14.9931135852994	9.87283877764973e-14	0.187704783843829
rvpF9v1nrUKOdXSB14	DNAJC12	2.90619602864176	0.0671699189916169	43.266332195584	9.87261326557063e-23	0.209705355472257
TSilf_Qp8q7pSV4Ccc	ABHD14B	0.235088775401651	0.0232821404476526	10.0973867042089	9.86834729080891e-11	0.052313471038422
xU7g3q6jDodJ3t50OU	SET	0.0504813705186856	0.00917456102546508	5.5023199887786	9.86726857376479e-07	0.0128131017644618
BoO4.pLSrHCTq6gdeU	UBIAD1	0.145802163634081	0.0264980795457601	5.50236719541475	9.86612671939872e-07	0.0305645393476648
lk3UuXoSPUPRIkSuUU	KMT2E	0.121068708661349	0.0159864808780601	7.57319322400116	9.86477774107092e-09	0.0396633435799112
WVHqq_qwz3utdJXsXw	HIST1H2BK	0.801434151543852	0.0260267220070098	30.7927426023147	9.85935158228235e-20	0.0423112452298885
lVJVEVzN1u512u8fV8	PITPNM1	0.301746269787885	0.0139241617274411	21.6706955646183	9.85686641470632e-17	0.0389343076323341
iinpMj_nt1nTJ5.6Zg	COX17	0.116851208909146	0.0154287198515279	7.57361660809306	9.85634487109577e-09	0.0185821847794263
rXKXUFM6WElBeucdAs	RGS22	0.323973343774769	0.058874331445462	5.50279444064482	9.85579858034083e-07	0.0884862581959918
oihoShWRJCRexGlhO8	TXNDC5	1.34645809330398	0.0437237268855639	30.7946780663965	9.84695208780215e-20	0.11103342298733
WpeSSi65ISC3XQ._3Q	RASSF1	0.107864045867112	0.028507446450198	3.78371475872275	9.84373653635578e-05	0.036047802488493
cSOTuOOzqsxZfKk.qQ	C1GALT1C1	0.254925333785963	0.0104467572851519	24.4023410162206	9.8431669354184e-18	0.034336666997494
lXnpc_cxQ474uk.3.w	OSTC	0.0769260863185242	0.0203306713063519	3.78374551235257	9.84285303767353e-05	0.0173552588477069
KEX7C7Vd6.Xa66ZXgc	GATS	0.266227581304106	0.048374828451809	5.50343204977609	9.84040606703467e-07	0.0710025515552127
9qIJfiCqbjIXo7fXgk	TSG101	0.0805757347736748	0.00696594759311912	11.567088855688	9.83813573499365e-12	0.0187069236955097
6DjoKCHq_Soe63deqU	FGFRL1	0.542874926341448	0.0537537678098606	10.0992906815708	9.83736387703164e-11	0.0857838710437523
05Tpl.rWQjP30Rn1QE	CHRNA5	0.282479130212	0.0188368053705287	14.9961272442702	9.83679457133448e-14	0.0509563900350306
6epKh_v.71BLpfdan0	TOMM34	0.0876396750715083	0.0231603079280687	3.78404619419135	9.83421928561621e-05	0.0215954601681775
QSgfdCo4ohIFXH1C50	MAN1A2	0.167012504818424	0.0303440074420046	5.50396993995041	9.82744032193873e-07	0.0452315088099505
NrjYut7vXPnrquMq6k	DCAF8	0.138453174121211	0.018277085873355	7.57523245667151	9.8242298088618e-09	0.029492615687834
EoGHR8MFKgUlAx7klk	MMGT1	0.0219128110784185	0.0047567989722983	4.60662962761933	9.82311936429367e-06	0.0119956673720347
HTF49VhHoxYI4FQU9E	TDO2	0.271328526066024	0.0492950817216	5.50417032673533	9.82261458114152e-07	0.0819822746703569
Nd63i0H9nqgBc6BceQ	SLC38A1	0.190545674496626	0.0217160545824403	8.77441497364361	9.81964460961663e-10	0.0286864531877132
odS7F6Sa56DN4aWI3w	HIST1H2AE	0.198439121471932	0.0430755875053331	4.60676529246093	9.81954239192206e-06	0.0594457299327107
lSk6f796.Q3vdvX7Fo	BAG5	0.0758521754616119	0.0116877890835688	6.48986518487473	9.81658754433949e-08	0.0200559591617474
0flyIEROp.olYSF6n4	C15orf39	0.103890720241212	0.0137136199881737	7.57573276281575	9.81430834677865e-09	0.0249346748513798
QH16i4VJvPXl10dc90	PCED1B	1.63268247640408	0.0530077627944462	30.8008184147538	9.80772190377766e-20	0.0932520910744535
6d3q3oKIEp4qieIong	DERL3	0.30571582330352	0.0555362574842067	5.50479699483637	9.80753898599705e-07	0.0759213269627643
6eSCi2mzot2BWKP7eU	GK	0.233992752451858	0.0231647797388331	10.1012293270199	9.80592066083787e-11	0.045169467235044
rQiV59Ix8TL.6oJQjY	NACA	0.0344311842283595	0.00747308407616806	4.60735940843511	9.80389370565856e-06	0.0101581099943554
xV6RCA9S07gkB5X_10	FNDC3B	0.804512759014885	0.0418660590603531	19.2163479694881	9.80133959327576e-16	0.0712151575421796
x6edx3tVxetFy4yVS4	SMAGP	0.287503658163406	0.0623942247075823	4.60785688917244	9.79081025514493e-06	0.0804283725036712
HBHbn5v4Jdm0dLZuo4	PARVB	0.461736645000398	0.0609377447489201	7.57718630551356	9.78554270628999e-09	0.0466755270098858
03FVHFl.P3c.V_X00U	AGO3	0.0571969619914684	0.0103880195891784	5.50605064809975	9.77745238855176e-07	0.0267017051749345
3SJ7tOU1.qV3noAsg0	PRRC2C	0.0502757156372791	0.00913094701806823	5.50607900120261	9.77677305028297e-07	0.0151100875715921
96KT.nu4pY2UewK1yI	FNBP1	0.0752517489131305	0.00744841783257534	10.1030514942409	9.77646229275818e-11	0.0136738952857759
WkL.JXkv9FFJFxUk94	UIMC1	0.0493814765223436	0.0089682264652689	5.50627002045303	9.77219752303342e-07	0.0147598102059834
Nd8wBK_mNP1Qj6.V_I	SH3BGRL	0.0448292574405942	0.00814128436609167	5.50641095738007	9.76882305762064e-07	0.0134284304857997
rkIu4pCIJ6BRPSIs14	CHCHD7	0.15334216807806	0.0278464553270236	5.5067033228193	9.76182679211254e-07	0.0427781781576064
TlR9ju_9_2R8qE0NCg	SETD9	0.313633551310232	0.0209051814084537	15.002670638553	9.7590063150311e-14	0.0531099279544937
fmEsnX95cs3kgR6fwE	RAP1A	0.122740260965844	0.0266299855616221	4.60909979398304	9.75820174830876e-06	0.0416673739046801
xao4d4_19JKji3v_dY	AFG3L1P	0.16663064696005	0.0219869617602443	7.57861175987231	9.75741833821243e-09	0.0394870426994596
iR4i94Hx3sFNUB11Sk	ZNF93	0.491363396922976	0.0559771452877448	8.77792882072089	9.75680323523946e-10	0.0937444985668534
9S6eSmSBIm8fjBJvU0	SLAMF1	0.247530036631812	0.0128780824437721	19.2210321460955	9.75617478050946e-16	0.0281415096163812
KJTdSrhoFS7PF56BQo	RNFT2	0.312004423062311	0.0143893622222499	21.6829917993075	9.74973748181084e-17	0.0395235425322623
0pxR6i0o04vTffX3x4	SRI	1.16480489923395	0.0477097269327613	24.4144113605083	9.74848231647264e-18	0.0952585871663029
flIigl_8_pP44r_k6E	PITPNC1	1.22413572373702	0.0282754663083646	43.2932108134639	9.74731994088398e-23	0.129764120792497
QAOjekg1lCaepUp7pM	ELP4	0.107229984350652	0.0194701913412861	5.50739242727795	9.74535723631098e-07	0.0326216262052421
QYBUChumt1xxT9RbOg	SULT1A3	0.152853505023213	0.0331593039178775	4.60967170486361	9.74323514975071e-06	0.0494509264398915
oE6KFQSiluneOeJgnM	CDK10	0.126539703134068	0.0334115446208838	3.78730479449234	9.74115279371045e-05	0.0284080009440582
Ngi9Xlgh6np8jgjgjk	SHFM1	0.044956908830351	0.00692348438077977	6.49339355125224	9.73973472636328e-08	0.0121026805818473
Hp.0Pe6H_xT_n0X7Hk	STX6	0.182181078782032	0.01802818055268	10.1053502459487	9.73943090993269e-11	0.0326287634818589
9ufhACQiiElsegij3k	SYAP1	0.312271358885856	0.067740279945894	4.60983271895652	9.73902579872646e-06	0.0555059683346725
Q3JUhairgLdQoCK7do	BTBD7	0.123474563447609	0.0224184735561202	5.50771501630186	9.73765731675898e-07	0.0379596124861372
NR0iIeNRExAehIaXXk	PCED1A	0.140252500541437	0.0215988895506076	6.49350515047617	9.73731419165447e-08	0.0357896259831596
xrvOEqIHoTopUS.ukg	SERPINB2	1.01511561615036	0.0877061750885376	11.5740495481148	9.73657360969406e-12	0.14690217921247
6iovSs3vuHrglexdeo	NEURL3	3.73275610355881	0.0771139098647388	48.4057430119447	9.73469300750163e-24	0.158188286979561
lNfX6d.8n7ppLqS1uk	MAPK13	2.44310602864611	0.0451765937994527	54.0790224134982	9.73348656090225e-25	0.131884862176112
T03kDulKfqgQ465ECk	IFIH1	0.282926619240982	0.0115874365457491	24.4166704278329	9.73086730575702e-18	0.0301516847794179
BJFL1tPdvXqgVUd4Xs	BCKDK	0.0716086632527231	0.00944703867450573	7.58001165444257	9.72988031983744e-09	0.0164985274834558
finSkqVEpJY937nj8A	SDCBP2	0.472109544036842	0.102404945067051	4.61022213065709	9.72885330931043e-06	0.108845387556209
6UWSSUSkiihihh6g1w	WASH3P	0.385977823900678	0.0333468107116382	11.5746548369608	9.72779386601208e-12	0.0583768896448285
cS.0j7p1KX7v3T8LJE	ST8SIA4	0.185717912252524	0.0245006167101891	7.58013214317538	9.72751391855994e-09	0.0387647284908237
6iroOju.pnk6jeuVd8	LAPTM4B	2.9720177856164	0.0549540696054579	54.0818506609969	9.72288343719067e-25	0.131803410253404
EQiIRdQfYQIvRSEl7o	PRKCB	0.458519553329896	0.0148799021010977	30.8146888477223	9.7197049913942e-20	0.0464768352022933
HkD7UFRVdBOKp9T.e4	AHNAK	1.49512538599623	0.129159521696379	11.5758046047189	9.71113919481898e-12	0.103080541772383
6eoNIoOqSJ6k9KF_KE	VWA1	0.203770601294179	0.0441917912306318	4.61105095810044	9.70723879824574e-06	0.0681284836541046
NpXiUkjQkDtzf5k6vs	COPG2	0.234821294559972	0.0509248186853236	4.61113658569878	9.70500860887475e-06	0.045048789330358
EW6rxUWU6SUA75_OuA	AASS	0.48026239732109	0.0546930642441876	8.78104754154688	9.70137986490778e-10	0.101676949663969
Zoq6KiyoLrX.EIP_OQ	TMEM30A	0.165799075285039	0.0300939535321231	5.50938164731533	9.69797700944098e-07	0.0372403497148081
NVQhcKv83XVfgzq6d4	P2RX7	0.556653516690112	0.0421570350306113	13.2042852702025	9.69420604505935e-13	0.0778251410996383
0uNJKi.P4oTS0X_q_U	EML4	0.485902384923128	0.019896449387129	24.4215626350628	9.692834406311e-18	0.0456690114359953
rrgiHkXH97oqErz4BA	CYP20A1	0.106025209005787	0.0139838378504366	7.58198215252309	9.69125497370432e-09	0.0310475135005621
TThQRqghCmgqnpw7ks	ARMC9	0.171377203022347	0.0371606657423173	4.61179044021239	9.68799635634022e-06	0.0633724603918288
uFCNkUeT1JcJDImIdU	SMIM14	1.2019405035661	0.0310532391182014	38.7058013172479	9.6705017169276e-22	0.0710379257309162
KQlEgFSTtXtEN06kX4	COQ9	0.0920471146584011	0.00910479939153123	10.1097356130678	9.6691911790633e-11	0.0224243546821429
TviuruMt9K5Lm9PRwY	BTBD3	1.16809501406531	0.0241234370347626	48.42158322556	9.6689492889044e-24	0.115910477757363
0rv53XCJfTkRV4FGKA	PGRMC1	0.142256238173683	0.00739740303051405	19.2305647788664	9.66493161216838e-16	0.0239699260239767
TnRtV456wXgIxhPniU	DYRK2	0.567207047286235	0.0184017812304536	30.8234860627269	9.66430919923889e-20	0.0603677380652041
Q96UE39x45.v_Ps754	LARP1B	0.187714668887103	0.0495285003409675	3.790033366543	9.66392468124696e-05	0.0685404828275667
Tv67vVkBVf7nuqesnQ	ABCC5	0.251570823604795	0.0387211974142879	6.4969794428921	9.66227112575186e-08	0.0599161445675817
3UIToHu90KvO6pup3U	APMAP	0.124145096769547	0.0191079795508301	6.49702897364436	9.66120565308492e-08	0.0312585260451812
oSqUQ6LW9eTyeXQdQ4	PTRH1	0.117498051891119	0.0310009983534478	3.79013767722907	9.66098491827119e-05	0.0384897392371753
fcXnTlKINTB5cil6pU	BRPF1	0.0568010198676927	0.0149863196729303	3.79019139504225	9.65947136276119e-05	0.0278913536698109
TvoIjrjqXqb.vvrfbk	RNASE4	0.301367862618518	0.0795119034024057	3.7902232209599	9.65857474993742e-05	0.077147072228556
l5R4X.i7p.gSgf0FJI	HSD17B7P2	0.170909698295176	0.0310105310386034	5.51134381034685	9.65147604824832e-07	0.0477380966404168
lp7OhH59TVP9eff6vk	ZNF627	0.201611911401379	0.0265835752718624	7.58407811363042	9.65034581993549e-09	0.0456891448445385
NGrUu7n6bv9KikiAp0	SNORA10	0.165269960533313	0.0299850061265538	5.51175343555975	9.6417977217321e-07	0.0415918861086872
TI6R6HZbzfiiUongOk	MORC2-AS1	0.570687635566788	0.0296719366259723	19.2332452970817	9.63943556592416e-16	0.0761326584981731
inLn3AL51ckeIrurKw	LSM8	0.0908924895642903	0.0103465825945501	8.78478364558425	9.63541719713614e-10	0.0282633128362275
KU6Ur5couq1HjgCK78	P3H2	11.4477128520249	0.0579682606836501	197.482427746081	9.63456293529075e-37	0.23702060669371
iqkL.ZwRRCrd6VDi6I	SNORA62	0.358725671885346	0.0408346229961812	8.78484103842206	9.63440755828306e-10	0.0596512784520113
fXN7ioOiRK5LyOe99c	PDCD6	0.0508378080342022	0.00338617722161307	15.0133335342634	9.63361934705939e-14	0.0128032501674638
KOeNdWen1ISF6h_ktM	ATOX1	0.178577529372286	0.0274805084364749	6.49833425699141	9.63317134960049e-08	0.0272309203939072
rnfjVj9ORJXksKJUgo	TPST1	0.621976883472854	0.0254598785982748	24.4296877171676	9.63001149240541e-18	0.077927678741134
xQapRN7Tt92hAs066I	CLDN10	2.39109091802779	0.049370674576897	48.4314005939611	9.62843610811995e-24	0.204562441002332
ol9ui.hDisSkqknZjk	SNRPA	0.0640838604926915	0.0116254071336964	5.51239709334082	9.62661024265889e-07	0.0206324771764025
Qe0WCUoJVv7Cbu_658	H2AFY	0.0572517509815705	0.00880968334253592	6.49872972222976	9.62469446417039e-08	0.012907705430192
6MUoffJ0s03V9OwkkY	CCDC14	0.156887783924521	0.0340003157068751	4.6143037399149	9.62289199731713e-06	0.0302732974152988
x0bgeXU4_wn14pdVJw	LINC00092	0.116390018829636	0.0306974997266826	3.79151461408658	9.62226558193401e-05	0.047346934438185
NateJLikjswwyld_gQ	SNRPA1	0.0720351897061847	0.0110839710524429	6.49904166704843	9.61801334214282e-08	0.0155014862460208
Tefp3cROk.SrMI7JP0	SNX4	0.0661074612047404	0.0143258809039274	4.61454772994918	9.61659592992508e-06	0.0204622941706311
KeO7d0SfgCXiEnt_4o	HLA-B	0.0577475014668117	0.0125141909136041	4.61456133005248	9.6162451104452e-06	0.0134818200690055
ZrKv0fKLCBLVS1JJRU	SF1	0.201973898722823	0.0532653778079311	3.79184203763875	9.61308209694998e-05	0.0714116384622738
cmREUEUpNxOpIUHTLo	TRA2A	0.137242071320769	0.0248930643620682	5.5132654350863	9.60616065241496e-07	0.0302177116642212
WAcOLv5u679zmJFT3Q	GOLIM4	1.4836533675886	0.0342448939222897	43.3248054718868	9.60216543321838e-23	0.0998891850368207
KhHni6ISJ5qtU3oR8c	ZGPAT	0.113271789916013	0.017426906525494	6.49982197071563	9.60132223601104e-08	0.0255115955626807
WlF1W79QtJ.XkIIDXo	FOXM1	0.124086417609057	0.026886503654544	4.61519352621684	9.59995204241321e-06	0.0348619905022449
3zSS37vJHqwn8PtXyU	RAP2A	0.210535705755987	0.0123717034628687	17.0175195669594	9.59960807075772e-15	0.0307619891896399
NK9s_ee6KV3k76VLfQ	INTS4	0.0958229534364069	0.0252664134000979	3.79250319066005	9.59456587438002e-05	0.0426113983557456
fpfV7SCqvukAlE8Qnk	GRN	0.511572727650074	0.0186242882748591	27.4680417366953	9.59237020646041e-19	0.0478741888747678
iLe0X4lqYme6lCSq_Q	ATP5G1	0.671252420576968	0.0663647728226558	10.1145892922851	9.59206689215524e-11	0.0765247978757342
ioLYjh.jT6wfqXqUhA	KANK1	0.998096682326263	0.0986777582688804	10.1147077095795	9.59019330480073e-11	0.140651589262533
HonqnQVHv.Cj_Z8fuk	BCAT1	1.64574870771869	0.0599139776437798	27.4685269187691	9.58901605411637e-19	0.0812164463846374
lSy3hs.Vfe1XLCVL54	BUB3	0.0713045168836837	0.00939790895560869	7.58727470339336	9.58830100875633e-09	0.0145271792194166
E0S1flzu6SLtUlI7uU	CD84	0.211723026742495	0.032570039041183	6.50054568478666	9.58586859244422e-08	0.054688717249379
W6hLuusUoICKPoClLE	ARFIP1	0.0743101781713381	0.00979375848756841	7.5875036397582	9.5838734228094e-09	0.0240196396204203
HYfQIqcXohLpp884ok	IL32	3.35294179382867	0.0554917085983239	60.4223924352176	9.58263750061102e-26	0.119653598626683
T1exN70bn7tSu4fsB4	CD99L2	0.20666050493124	0.00952208170632599	21.7032904468721	9.57554335093526e-17	0.0286204385813917
lJKJ.uJ5KTpjrmXvUQ	B3GNTL1	0.209499101891194	0.0379896626167138	5.51463444160789	9.57401209499083e-07	0.063888778458436
foshZXXYEkSpcZFfzA	RAD54B	0.214921965993389	0.0566590343702213	3.79325148023255	9.57365378817737e-05	0.0628629288630816
c7XeqIK5TrfK7e5VKE	MYD88	0.184322051587989	0.0485909983671484	3.79333740367447	9.57125554559594e-05	0.0401697543721275
912hWIFYA_UKFTXo00	PITRM1	0.719532410384585	0.0148524233495248	48.4454552265107	9.57074569123193e-24	0.0642916435511575
9ioTS59d9RUPVUZr1M	TNK2	0.688976362257825	0.0199260583998165	34.5766507571898	9.56839230997166e-21	0.0549183802021279
WihIT5WgHS3Pz30n5U	TACSTD2	6.38879074486063	0.0614090519377683	104.036628856199	9.56492883687105e-31	0.289117152867624
EnoqZ7T7c0nsdXDtd4	TMEM39B	0.0529886787214667	0.0114779051459126	4.61658099172708	9.56429443921757e-06	0.0211315473146243
HPuot1m1Z2eoiKxd18	MATR3	0.224367050009728	0.0591435652648812	3.79360035203955	9.56392014997496e-05	0.0654282799196649
r55UN9FJ9IDeF.ljnk	UPF2	0.0426259790484613	0.00421345970874688	10.116621967447	9.55995905676612e-11	0.0123858455848232
lgJQXEMcZcqREpSVS0	PSMC3	0.0712326727083892	0.0187761357103493	3.79378769983678	9.55869730815576e-05	0.0189650173094064
B1eogKZ4m6Tkrt.nu8	GTF2E2	0.0612583750241306	0.0132683573053327	4.61687710199891	9.5567022819307e-06	0.0157409492292576
uVSKiL_7U6u83eOkHU	MDH1	0.0676980397543153	0.00584266931861469	11.5868340415279	9.55288008978752e-12	0.013369951770012
clX.OKO4y_eQOKrxI4	SPRY2	5.26881243883621	0.0329947481465946	159.686396617639	9.55134731479675e-35	0.179085935064539
NS4l9kjnojXqvref7s	TMEM42	0.0937394623338625	0.0203024173401879	4.61715768931164	9.54951390112117e-06	0.0284722949566541
r0u3DRKFP3itRO6d10	TMEM170B	0.22795398548909	0.0172484815068293	13.2158871723771	9.54419967307523e-13	0.0418491089921902
fk1EX_OkOSPrJK9TKY	DPY19L1	0.7588649390935	0.0156620897648205	48.4523425984972	9.54260695536685e-24	0.0735747788477309
Q0akKULqOXoOJ4CofU	DBI	0.0414561867811551	0.0109254994942919	3.7944431559229	9.54044783897033e-05	0.0114548243745383
QCWSYU.SMW1ElKFniA	CHST10	0.280820917808641	0.0277546642327281	10.1179720804368	9.53869491391144e-11	0.0604165701927878
KXlXe.WOK7Gji4XkcI	WDR5	0.0739509028228867	0.0134061378589337	5.5161974015959	9.53744574358004e-07	0.0276996952662392
xsk3bRlJHZdXFDh0Xg	BCAT2	0.105166132631745	0.0227746475635431	4.61768430612692	9.53603762899739e-06	0.0272415903037342
ZqJ0KryTi4gTfV4Hds	ZNF114	0.206193934803688	0.0446526648776632	4.61772965552237	9.534878048988e-06	0.0685064048784911
ubvYRJZ3e17AyoHAp4	CAMSAP1	0.080272532343717	0.0173831793319422	4.61782800550261	9.53236375173069e-06	0.0267019219189664
foiFSC71NeJj96Ekug	CYP2R1	0.196691361781763	0.0518311342097193	3.79484965514954	9.52914802811765e-05	0.0476782415298985
0lKXO_iovAxe5NUkmg	DUSP22	0.278787127131437	0.021092758833547	13.2171959738163	9.52743044347818e-13	0.0436620572639136
olIMw7kpDbo7d4QLu0	DEK	0.166762125114208	0.0256422041137536	6.50342397924997	9.52466375730332e-08	0.0252302102128363
QnimrgNF4rTi9CFJeE	RHBDL2	0.567836512474101	0.102927155059054	5.51687756402385	9.52157836480012e-07	0.0765086354837328
r_nlt6Wp3TrH13uB7s	PRKCD	0.114802344278791	0.00764162815431269	15.0232832533208	9.51813659762552e-14	0.0199949469978831
TA.PgXqKaK_y4lCtmU	C8orf37	0.272490335826837	0.0717970946460768	3.79528359984587	9.51710056182594e-05	0.0329292311095928
B.SPu9dVKJKgXu6SuU	SYNE2	0.808869276893879	0.0233871666821459	34.5860312147765	9.51603954907898e-21	0.0962294676120282
ZeTrN5HSS.EXnKu9Ao	SNORA8	0.257323318887396	0.0395646747793806	6.50386538805828	9.51531359848322e-08	0.0523818602536205
o7SWQwEglIJXerpXSs	LRCH4	0.110137505256768	0.0199626215702128	5.51718645115777	9.51438146939449e-07	0.0251261768117904
xnkEUS.NPoXoquuBcE	GABPB1	0.128662828832556	0.0338976040877477	3.79563194199502	9.50744104690118e-05	0.0388619755559669
3XfUx6yOYD83uTgKtE	NRCAM	7.44914034452069	0.0419263631001576	177.671989500389	9.50712995662956e-36	0.29075663779169
ToSXz7j4Dn7K97lD.U	SS18	0.0921424281003171	0.0242753054936745	3.79572681894064	9.50481186960505e-05	0.0231390815165837
TlLDb.70jIruisiUlU	WDYHV1	0.140195864446555	0.0254070040101962	5.51800064227537	9.49543839105476e-07	0.03331178763544
QFGu3onotXpXeUj.r8	DSG2	0.435687692615438	0.0495493452345282	8.79300605392927	9.49189015600804e-10	0.0784308139617477
ZX0RVdEh1_7UGoMoIM	OXLD1	0.171451580948874	0.0225822096789447	7.59232968723752	9.49103323837019e-09	0.0275214015538721
fXO6I_yCOreuN601BI	ZBTB8A	0.428649441763042	0.0487474703246495	8.79326535117232	9.48740043031356e-10	0.0934814300731675
uy9WuHtkl3vld4fkjk	ZNF682	0.504963978377027	0.0498912458413941	10.1212942242878	9.48658149574956e-11	0.0917807780429477
W4pIkIavdFXh96KfV8	NARFL	0.12921009130745	0.0279694881264006	4.61968022880931	9.48514037741771e-06	0.0430812675067773
u2qF1AhwHhCX0KJUqs	TARDBP	0.173394231265595	0.045671625804379	3.79654168669795	9.48226163832908e-05	0.0472237736261459
3lC1xSzXeF3uUDRn3o	TGM5	0.367493498167594	0.0795475700678981	4.61979539857621	9.48221209850341e-06	0.0961396967881214
E0LNfvhGlOFH9VupTo	HMOX1	0.542012651654492	0.0833127760599794	6.50575670728197	9.47535882834749e-08	0.0772171380790621
BSgrNJeuhjN3Y7dkuE	LMBRD2	0.130749130073017	0.0236912910285008	5.51886893439977	9.47527983394654e-07	0.0454182928392448
ooufegc0lR_FFS.ugk	DUT	0.256926225112658	0.0394915848745634	6.50584740847269	9.47344713348061e-08	0.0426334616300474
EWe_.zqC27TXKr6p6k	PDE4A	0.317996816681827	0.0240510696886507	13.2217327877057	9.46953967667457e-13	0.0691823655725623
KquSiX96P6O6c6AgRI	COX7A2L	0.0989672607827932	0.0179316956799785	5.5191244904571	9.46935524682757e-07	0.0196334370037297
rh0PXeJLjr3kuunheY	HENMT1	0.780625668243963	0.0359469306503929	21.716059038143	9.46763823648667e-17	0.0739411166282373
iukKCAu9Yk2uncGUEk	SSFA2	0.456786032646041	0.0303954370876899	15.0281119935281	9.46261342507953e-14	0.0762904556550616
iTgJE79LlHRMILlaUo	PREPL	0.162153211590337	0.0350925681783975	4.62072797767353	9.45853510950963e-06	0.0390792419210977
Bf3tFEiPpca.e.4q54	DTNA	0.62754473942089	0.0368459597232724	17.0315753513817	9.45331150946511e-15	0.106073922741744
Te_l.fJf.e.U9LnUJk	POLE3	0.134379308357017	0.0152782396242925	8.79547066033403	9.4493050299938e-10	0.0219307744924032
ZkINSxfkTILJBU1flw	PPP1R3C	0.526547737003841	0.113944169402018	4.62110294688333	9.44903243107471e-06	0.115307398192351
BTkXEdSXq4SpSHe4AA	ANKRD30B	0.190352840258559	0.0411914649867605	4.62117189373432	9.44728622073115e-06	0.0298638448520625
iKIIOVr5IKJ6qO5KlE	SPECC1	0.308583440919245	0.0474216711261685	6.5072240937743	9.44448025137651e-08	0.073040473072097
311__vni6mlCqIAolk	TP53I13	0.32135595091011	0.0277160563647641	11.5945770451909	9.44338845150863e-12	0.0401021442678728
ulIdet.UvyAKd7lCio	SYVN1	0.353323857752046	0.0542957937173301	6.50738912836396	9.44101395416032e-08	0.040600114076098
xkuLp7.eUTogE63kuI	ZNF84	0.275765795528762	0.0363074292341955	7.59529940139735	9.43437060536721e-09	0.0589347879585693
QSiVH3hMHBUReIwaTw	FDX1	0.18526532436674	0.0335577792012933	5.52078620147783	9.43092551082876e-07	0.0596213951701458
f_JnRXubpfucFPJHk0	RP2	0.2124049081724	0.0559194746083907	3.79840672073355	9.43085759648e-05	0.0608349304748068
fllCHnhJ6Ia96.Qcaw	TBC1D2B	0.184067711391701	0.0158738942272132	11.5956241585727	9.42868244708184e-12	0.035394924718549
x54gQFReJFUhF9dBUo	LST1	0.604551327293966	0.0247198002330116	24.4561574768161	9.42828329307415e-18	0.0901496645536853
lWe.yrIR4Qbzu638F4	EED	0.184192576641931	0.0242495817614596	7.59570117348056	9.42673187084301e-09	0.0542479562587669
6LvpAYh.delXl56I0k	BLCAP	0.171816495876926	0.0264004806959879	6.50808210105953	9.42647359573438e-08	0.0370148219285035
BSseigiIIpOEnBKhqc	MAN2B2	0.237951414842299	0.0179923119468861	13.2251717035998	9.42590325658642e-13	0.0331449155712083
ujaFNp3qg164My55zs	CHEK1	0.143541809395975	0.0310559178465953	4.62204369888593	9.42523497501776e-06	0.031018288352363
rOezhdXiRW4eVTn9V8	RANGAP1	0.0713421583949545	0.018780975661924	3.79863962763083	9.42445848833335e-05	0.0191970534346059
opD.CjABwT6UpGunRk	PHAX	0.268147779471939	0.0705846442448937	3.79895347409558	9.41584266883172e-05	0.0689102007071387
oNQKXoEQ6x0AEyeXao	PYGL	1.04298934378126	0.0240507837829625	43.3661269916745	9.41572541088624e-23	0.102044132412597
HI7XSGoK.iCrSOspqU	CCDC97	0.078545176861913	0.0142250071609369	5.52162652526495	9.41155349949086e-07	0.0241734178687194
uu42IlPSAIfX_70lzE	SLC39A8	5.10227078979922	0.0941948131632793	54.1672159904902	9.408465238884e-25	0.220520623462225
9uepaotXt3RJNySzzw	IKBKB	0.0672147964817781	0.0121726845955406	5.52177261755404	9.40818985693199e-07	0.0212890606056063
ulT0A438W6XlU5861U	DHRS9	6.70194393428233	0.0798904982128106	83.889124291475	9.40629838302785e-29	0.211685816240017
6R7vUWkOAIvfv.XUkM	RPL23AP53	0.157949585713066	0.0155976363137332	10.126507794902	9.40539642220984e-11	0.0417118307759445
6D7o3VXlT5efiqRRx0	HDAC6	0.0779649401909538	0.0141186679974108	5.52211725675903	9.40025980737878e-07	0.0278962578876117
xu.jfK3TjeLkxXdSgo	UPF3B	0.0617683689537674	0.0133609614776621	4.62304820330756	9.39989350881788e-06	0.0186880222637567
KowqTEZ512f375WH2w	EIF2S2	0.205830741335545	0.05417151815512	3.7996118319252	9.39779565739517e-05	0.0599929185066628
ckIk_Hqk16e30XueIk	PDCD2	0.0692133586682518	0.00683453620603109	10.1270015377452	9.39774561790141e-11	0.0174015686396574
uJ6tZVpdIvmQwO8WFM	CCDC151	2.00376915511537	0.17276186398689	11.5984460278075	9.38917016055278e-12	0.134362117137829
K8C6STfuqU1LE1QeJ4	EIF3M	0.0395065752990378	0.00854474578953105	4.62349334575183	9.3886861615397e-06	0.0119692966387065
3_IUl6uESQhVN1EBv8	RAX2	0.437985620163438	0.0793052919704044	5.52277924059453	9.38504725511467e-07	0.065837462024598
uvt0HX6xKvT0BVQnuI	ITGA1	0.946946232870387	0.107615213901155	8.7993713764316	9.38231293732873e-10	0.141923930859054
TGSoW.8DRKpu7SXlco	LBH	0.300935673672594	0.0462233083030865	6.51047457917459	9.37645234161868e-08	0.0732391592850433
xolKAjS7g_6EVN20wo	CEP152	0.171310332571927	0.0129494145836925	13.2291951473746	9.37511630198459e-13	0.033716525655596
lofUF_Hnidenyffq9c	DDX18	0.0885545928065449	0.00588956974106503	15.0358339742711	9.37452466336195e-14	0.0182551671242733
ZkRV5uweT1BRwwLlz4	SLC44A2	0.468215765486044	0.0170260682023652	27.4999348012127	9.37447498913254e-19	0.0418587627676304
cynKnfL.T1z5VCz7QE	CCNG2	0.440148143376683	0.0951849280180429	4.62413695678007	9.37250649759296e-06	0.0663150079897075
QCjrVJ7tAKCfv7DG7k	RSU1	0.328898748589208	0.0170751452774102	19.2618418904072	9.3717702250112e-16	0.0437222501024094
HVRS77RKnO_fArLenk	HMGXB4	0.0931158168624198	0.020136259218948	4.62428576479581	9.36876975205792e-06	0.0290102535793346
WIJKApNIILBL6SKt0o	AS3MT	0.283753495930748	0.074657744518734	3.80072419492321	9.36738460576072e-05	0.0848700799441183
ZpO5egcWLKJT9.sVeU	CCNY	0.144379561250019	0.0379871583191904	3.80074655853057	9.36677424839208e-05	0.032323352685849
BnaDuFKSokuE6CSM6U	PHF14	0.143390253589529	0.0188699458663114	7.5988693664206	9.36672182133193e-09	0.0320920841259197
i65p6U6ICeH6eu6xIg	MAT2A	0.119810429182553	0.0315220472574268	3.80084542745951	9.36407636699351e-05	0.0226737063023484
cDDJSm66ROXs9Unn6g	POFUT1	0.455936215080889	0.0825406605084494	5.52377715749217	9.36216328122186e-07	0.0428172899634951
KDiAaSZYSiaaSOCa8w	TMEM208	0.199473707619518	0.0196925502820314	10.1293994308868	9.36068131678286e-11	0.0353296569234196
TdRf7_R3vl7iif3pO4	ZAK	0.992900875442563	0.0164142288256304	60.490254278177	9.35982080797826e-26	0.0717653373207749
cruommbTsRTRQqlSQk	FAM195A	0.160595608204961	0.0290722511965337	5.52401694383091	9.35667322039493e-07	0.0343281206637753
cHu1RDSAXW_6SKpfRY	TNPO3	0.252364781582172	0.0332074500892167	7.59964348072969	9.3521196706539e-09	0.04005668974579
ovWQcXE_.jXTgJJHp4	SNORD34	0.133380531136991	0.0350860173898916	3.80152952826782	9.34543099743157e-05	0.0491932349002132
oRR6CRSTB7ihX1Ae6k	ZNF438	0.057348129294154	0.0103806414039205	5.52452657429195	9.34501603116464e-07	0.0308810682466723
NpeKFKCyJJK5ICJ6BI	SFI1	0.278595045497334	0.0366559794901887	7.60026193194216	9.34047086338967e-09	0.0641765164892145
c9PSir.9NS5RJ0qB1o	FAM210A	0.192827868904352	0.0253709277239495	7.60034757114251	9.33885900387177e-09	0.0395361845364571
xg3S30l5Hj_yXke3x4	AKTIP	0.0754128493432475	0.0163037482276296	4.6254915305578	9.33854853223054e-06	0.0234339476269997
3SJ_qf3p530_F7u9Uk	USP36	0.694773172613753	0.0525061315640038	13.2322293019595	9.33700603641908e-13	0.0776158383188112
x99U7IX0kAlrH6CUSk	PHLPP2	0.0924405448918007	0.0199847114756651	4.62556314632629	9.33675674758654e-06	0.0330532910814853
xg0fiXqA6K_S4liPmU	PNPT1	0.424170968920289	0.0916991155478458	4.62568222589857	9.33377823647653e-06	0.0458373032963905
ltevVv3UXIewF3YqSo	CDKN1A	0.25232495956185	0.0217474249690006	11.6025212144206	9.33241368626281e-12	0.0251276232923945
KSlWkkecfqKJR9F.s8	AKIRIN1	0.235720135388335	0.0426632022670226	5.52513929716287	9.33102073261765e-07	0.0435091998747032
uMWn1IhV.3UlM8TSnI	RHOQ	0.397176779914817	0.0718852497875752	5.52514988942093	9.33077898508733e-07	0.0445846768263981
0J6bK6S_peuKvKH0gE	B4GALT7	0.143990584621077	0.0189439382022339	7.6008791352633	9.3288606492065e-09	0.0296777402578386
iF56_ZIxcp_1P85P0k	SRSF7	0.125377586812396	0.0123745186909154	10.1319162339979	9.32194316342883e-11	0.0247510078969474
9uRN57lK_CzLoFTSyw	MZT1	0.182214357272046	0.00744610372798907	24.4711011192502	9.31635195670654e-18	0.0283833027144293
E6HW0QzrKM1dFB1YR0	HIBADH	0.120905805788339	0.00913595914983717	13.2340571805746	9.31412526181283e-13	0.0247625232232132
QEZVcR5WUU.5EeXvRM	EVI5L	0.447999580726361	0.0262827017253684	17.0454158559334	9.31153096279959e-15	0.0532251680021901
fJSk5BI.7k4DiH1.S4	CCPG1	0.199052881896009	0.0523412767735715	3.80298101548253	9.30599730897053e-05	0.0702154641709352
QKj8ld5XCuU_AKhKFc	AGAP3	0.195105942184858	0.0299523133997761	6.51388557473883	9.30561405495827e-08	0.0440613531775258
0pYPku3U0kv53U6kRg	SNORD89	0.848229018976395	0.064088104595007	13.2353581735116	9.29787555622603e-13	0.0844137917006108
ERl1up1PeyT5Sb3fRs	ZBED1	0.190747130996665	0.00877542077028647	21.7365224973068	9.29734783853545e-17	0.0273640034686076
cjl6QBRdXuURIRHKXs	RILPL2	0.428938286734793	0.0324078658044842	13.2356227751178	9.29457424644443e-13	0.0426012728282422
lcOO8SHxsxX7MXqEqc	GAS2	2.90024440759387	0.0597803488239892	48.5150131213358	9.29050231281431e-24	0.133615897704435
6TTnqoj3SEdjo1FRPQ	APOBEC3G	0.17400236209543	0.0149929955767966	11.6055768311383	9.29009225383011e-12	0.0264808608746456
uzp51JVH3yT3x133qk	CAMK2G	0.196302562056988	0.0148307663882417	13.2361711403278	9.28773644980929e-13	0.0414426621593217
irtPvV.eDyexMwl9f4	RMI1	0.114957905381203	0.0176453491822336	6.51491246752708	9.28439733153233e-08	0.0262991682913256
lKUJ__nTlzLVJH_opQ	ZNF14	0.656850090815655	0.141938555276027	4.62770731700266	9.2832758472172e-06	0.0542829487948752
lDihIgXSu985y5_eLk	SWAP70	0.201921838952017	0.0173978176673923	11.6061590489287	9.28205108328726e-12	0.0267841988209456
NUongoVQ4o4lATWLnU	DEF8	0.27933497322414	0.0505369782939215	5.52733825120165	9.28097342699971e-07	0.0566885865600317
cUr8U3R1SwxUnXNwJU	SMG7	0.157943600400724	0.015584496013783	10.1346620552271	9.2798708872656e-11	0.0300795248243437
oqJ2QMdf_vz3xRfn3s	CD86	0.851349082229607	0.0391627490048001	21.7387467392868	9.27903227560401e-17	0.0791191863453858
Q6KC9xHZdFBJYRriFE	FZD2	0.530161516390647	0.0813711589289459	6.51534921425403	9.27538895448024e-08	0.109432594016914
KDpXnu0v1e6X.gexN0	AKAP8	0.105958253972696	0.0191686730373194	5.52767809051815	9.27326377920246e-07	0.0317701724672731
fn9CiKQYgL6SgLhlNU	SAT2	0.151217444968868	0.0198864537284814	7.60404278377167	9.26958513195132e-09	0.0321993633249787
9SlQ9T7jvxfzJSuLks	KIF1BP	0.102339445871075	0.0134584818179084	7.60408545746204	9.26878826963371e-09	0.0266890862646547
xqn6O_R5VHl7V96wDA	FLOT2	1.00891151066973	0.0149407566187315	67.5274710923834	9.26688330722325e-27	0.055257398008525
KOLe.fsOnhSPgler7k	GRM8	2.05741431764373	0.0273192777237439	75.3099821469871	9.2635851916176e-28	0.132767901004294
T7mopoaqkiEQwA9WtA	ETV2	0.377325793507641	0.042845966530885	8.80656509955611	9.26006263834551e-10	0.0796322322974004
Z6hXT6N694ooRF6TaM	RPF2	0.0644496988993222	0.0169393585603891	3.80473077947775	9.25868871945988e-05	0.0171221701323326
c_gKVfo9enqhDjhehU	NPRL3	0.159364230151206	0.0344293757336163	4.62872842610403	9.25791876760442e-06	0.0531065855690494
xKpnfhHuX0.1JUSXq0	TYSND1	0.0987526978292413	0.0178626911485413	5.52843337031586	9.25615324064455e-07	0.0229804074767226
cJSqpSF_9O7q3t9fOU	ZNF641	0.122552919993643	0.0264757638483885	4.62887192586524	9.25436102277641e-06	0.052885676382652
lpFSH_eX98TjUpUgVA	SNHG1	0.114407728335922	0.0150437336784271	7.60500888818472	9.25156218262671e-09	0.0216424108619021
cumUIGBe.BJ7BQ6x40	MTDH	0.101654066674512	0.0219590497395021	4.62925617822369	9.24484136194918e-06	0.0207409764235889
Qp9WAlX7nu6IXQ7pE4	APEX1	0.107325856251688	0.0121856875275096	8.80753392120023	9.24372594438377e-10	0.0206208540819972
cjqO7E76s1xx.u.03U	GFPT1	0.113168246156135	0.0173649411470628	6.51705325101414	9.24032835148453e-08	0.0231005153034445
0TqgqgKoOnn.jO9XhE	SLAMF7	0.592159691930643	0.0241880476059639	24.4815001846051	9.23928078423229e-18	0.0555675278093821
3h7Sgq2i3sAUkxL_n8	ITGB5	4.09513656805567	0.0606353648029461	67.5370978860954	9.23909806760802e-27	0.224463308140161
HJyl3jTIJIyfS1S3KU	CSRNP2	0.157605151843062	0.0340433082092859	4.62954865826089	9.23760212992572e-06	0.048312045180889
xKf56fuaTXnW3kr7n0	ATP5I	0.100572924939285	0.021723804774175	4.62961833733862	9.23587835738528e-06	0.0255535053936866
xWCCvpXlABeP0h9yVU	LOC728178	0.194129786436092	0.0510114800063447	3.80560976493813	9.23501738792669e-05	0.0646441766913449
ZHhO7uXi5SUW7gd.oo	ERN1	0.655270518911228	0.118505614013867	5.52944705923006	9.23324018011828e-07	0.0707570359849292
N3eSRj93.jDlfypEHI	ZFAND6	0.411563013262069	0.0744308831598111	5.52946567056579	9.2328200484149e-07	0.0638944746093188
lbn6r0nrintXsoICd4	ANXA2	0.142336240013091	0.0307436922259835	4.62977052225346	9.2321146556318e-06	0.0516250349964594
9zfU9dleVUilKJ3lfg	IFITM2	0.976174265338942	0.0448928604097427	21.7445325699739	9.23156516487152e-17	0.0552712994643687
TXiwenn0o0n5It_f8o	ANKRD46	0.133287358300898	0.015131764835867	8.80844764286614	9.22834593402514e-10	0.0314496215214768
oX0ScI5TuSuj1OWSE4	EZR	0.0368623806574692	0.00565578479297738	6.51764202613228	9.22824641589822e-08	0.0100989806421976
fui6qfUrpX1aRE9T_8	SMARCB1	0.267058301053876	0.0156598694333334	17.0536735437538	9.22800020316428e-15	0.0360481779570391
TR7dIiv9e52V793Sgk	CECR1	1.33262687122372	0.0306992282279762	43.4091326768043	9.2257006710986e-23	0.0801535950352972
uYd0KR7s5XkL6e3OJM	TMCO1	0.141852069813832	0.0139916673854083	10.1383248977007	9.22405617315857e-11	0.0221185513603675
Tpzgse6SJ57.eCuIJQ	CIPC	0.174204219258298	0.00801098493654575	21.7456680593152	9.22227940906127e-17	0.0312493074872986
E2l71SHaX0XV9117vw	ASB16	0.663964692171204	0.0753719110996365	8.8091794739487	9.21604681939725e-10	0.112272590703376
oudu78lxv.dOXU8Uvk	FUBP3	0.0547519140576089	0.00990045999751778	5.53023941022297	9.21537126833249e-07	0.0172557379415149
Zo3ErTflXgOlegJzp4	VLDLR-AS1	0.351480597444526	0.0539220206209309	6.51831280425148	9.21450180132169e-08	0.0855497443305661
6R7R.SJ2unRJu15Vr8	GNA15	1.89650691363936	0.0488815037700821	38.798047673814	9.21196225934732e-22	0.092273048252815
WkSBLsV8uFL5xUJPuU	NCKAP1	0.432249473998403	0.0568211258676734	7.6071965734195	9.21088527080081e-09	0.0875687909471837
HRHnqE6SofRLqr.yek	PARD6A	0.219806897458914	0.0288944720353773	7.6072301023459	9.21026330137939e-09	0.044091545230542
0e76KSeYS9HfepO8Pk	BEND4	1.25409247783813	0.0288874851190012	43.4130029897698	9.20879710127203e-23	0.110987360751453
EeoKhN73_uw3dOuA3k	GNE	0.0946454529457983	0.0204384624564425	4.63075210023759	9.20787737185978e-06	0.0264549962002762
TpBA4C7STfy9JNfp7o	MSMO1	0.379650053474547	0.0582405628786091	6.51865357595963	9.20752737455898e-08	0.0478585070951606
3STtKUo88qI9dgHLu4	MRPL35	0.148030059591228	0.0267652383104265	5.53068341385038	9.20537394094442e-07	0.03779085177491
EbBFAwVVILJSKUv4E0	MGME1	0.0981678619170619	0.0150592636161233	6.51876907260974	9.20516480318316e-08	0.0235762597915405
Kev706Oz3CJ4gSpehE	VPS36	0.703347102828073	0.0412371825725053	17.0561386338994	9.20321660892574e-15	0.0691218708257088
KRFX.U.CFece7giOMc	KCNMB2	0.462147869238067	0.0524538381210166	8.81056345527742	9.19283445050311e-10	0.0960331826351088
fcp9ebuwC2Kz56T0q4	SPIRE1	2.1287802190659	0.0164770420085596	129.196746476705	9.18827393770306e-33	0.124831702541372
TeclJVJX.SVCiE6CAE	RAD17	0.137154075541475	0.0210368709193361	6.51969943949265	9.18615647145798e-08	0.0382916711746059
HXXnFLJv_FReUu.n50	TCEAL2	2.44778685382227	0.0999498243411888	24.4901566356585	9.17563309256628e-18	0.220273956898852
9op4popKPn4zioj4p4	ZNF526	0.258962145204539	0.068006825252858	3.80788463866214	9.17404450066424e-05	0.0561997741814483
TXnJSVSV.0lQohOggA	RAD17	0.112060668260808	0.024191829701523	4.63217001952331	9.17298246429603e-06	0.0347234176847577
6_RziXMhzS9X_po__8	HPRT1	0.0948318172681599	0.0249033568196182	3.80799335427158	9.17114106576075e-05	0.0197255340420279
WB9gp8OO0U.cXlGzaY	PMS2P5	0.280607616593284	0.0164488562094143	17.0593999376493	9.17053486096263e-15	0.0448017140434611
ui8QkUqjncTQqORfS0	AQP9	2.36576522848562	0.0544833398309838	43.4218099665809	9.17045322909292e-23	0.167861639823623
NSdbVSZ0674B7e05FE	EVL	0.307160117582269	0.0125417958316488	24.4909199372517	9.17004284850281e-18	0.0290716813225289
rWIci0TXhEHfteu5yI	SNORA45B	0.622235558786757	0.0613501511579317	10.142363906895	9.16291558871845e-11	0.0791256653022124
NXuX5S6j1_7t07erU4	TP53BP1	0.0811691916170994	0.012447610120946	6.52086551783246	9.16239006669188e-08	0.0244205251319679
QV130T1VYVQJSICUjo	LZTS2	0.159193119097898	0.0418010352661362	3.80835350331295	9.16152946008248e-05	0.0613654907165774
o6gqbp3gN7RpPfRunk	EIF4G3	0.167389775530197	0.030254812814519	5.53266604412335	9.16086993971646e-07	0.0318948665975935
QFr15IPifSe8e.4JZ4	RPRD2	0.114583223342217	0.0175715052511415	6.52096799360845	9.16030452398256e-08	0.0294472722645461
rnX.J5Gl7fyuUu45Fo	EXOC3	0.0888765959449818	0.0233350394805982	3.80871847330182	9.15179981957465e-05	0.0294201608635955
Z_jed10kNIJ_Ad6F6k	NLRP7	1.41082780872497	0.0575982066928822	24.4943009466876	9.1453238928814e-18	0.157720788885672
ZqbssL7IKdiqG6Hz_U	NET1	0.193883769557609	0.0128766368436063	15.0570193065496	9.13722467860171e-14	0.0318024505686371
ZoOoiqC36SoDV.6URI	ATP8B2	0.594428307311939	0.0122424837213744	48.5545515796041	9.13504153658888e-24	0.0620958239083452
Ko9d7uro5u6kYf7HSA	HES5	1.02537217460237	0.0331723343842786	30.9104617939798	9.13405975767913e-20	0.123016045088632
xqk3l6LxfU06cXnuv4	ZBP1	1.94789245986467	0.0562059259292417	34.6563538925931	9.13297769555407e-21	0.115011013733992
EbcWekKI5WUAJ3gofk	PTGR1	3.05970128279257	0.0263548385487224	116.096377412295	9.13008619191977e-32	0.144214797749445
NuhfT1PnqWXvXUYQJE	SOS1	0.181785605764517	0.0278703628146383	6.52254177577618	9.12833765675125e-08	0.0564496461901852
okgunnI3d1.FFOSgSE	VEZT	0.168456465898751	0.0191113358041341	8.81447888442787	9.12749415268317e-10	0.0305553664616487
KlNYvHTiFLlTgrSHik	UCHL3	0.0904287128606296	0.0195139532276196	4.63405399233194	9.12683029814512e-06	0.02294197947649
HuTfddOp686_i_eoe0	C3orf38	0.0441945189659192	0.00953676214403934	4.63412196911523	9.12516956694861e-06	0.0178115318655333
oZ79tAkYqWXul8PXBo	NBEAL2	0.212323150989381	0.0325508534370042	6.52281364604743	9.12282717978323e-08	0.0421762388700229
0pQq7VE9UEWV3jRTqA	ROGDI	0.196314516402475	0.0300953031857897	6.52309482282171	9.1171317181035e-08	0.0622206785016132
rpUbpNjXV5WYLhL8QA	ACTN1	4.72488697159606	0.0699150049814939	67.5804424650576	9.11506981960857e-27	0.171543210219096
NcIKgflNCPXsUpUaW0	SIN3B	0.0587967028378652	0.0126863091448878	4.63465789508673	9.11208741823106e-06	0.0305899106809023
oVFD92hH3S7ugnTupU	MUC1	0.317766692762717	0.0833980124536786	3.81024299516985	9.11127337566564e-05	0.0870773562188627
Zn2Iv_F5eCJFI_RN1U	PTTG3P	0.169952234900676	0.0167508076922108	10.1459128433374	9.10954276303965e-11	0.0253169623096898
Qr_XT3UIlEHQnge4C4	FBXW7	0.324787473639677	0.01683640246507	19.2907881783834	9.10873178101515e-16	0.0369097700223472
BoR4ipDf5fzd4pzoq0	CDK4	0.128568466948791	0.027739504364203	4.63485090651816	9.10738070949694e-06	0.0242196615206219
BVgkvnlKcISxAhukCU	AK4	1.01786084603253	0.133702710124409	7.61286622451716	9.10633202154401e-09	0.0952778665571756
3qW8p3QThzIhVu00aI	DDX11	0.140481129132988	0.0215329101145713	6.52401966968342	9.09842432688594e-08	0.0412826106894295
uSRUkTKE7__Hg5s3c0	LARP6	4.23314939963778	0.0698861536954884	60.5720758089317	9.09835104729055e-26	0.250566620082697
Nr1NDriRSXg5IJnUs0	CSE1L	0.117655883269448	0.0253828969274058	4.63524252593942	9.09783857160958e-06	0.0224796320024495
BUp.XnUXiMFB1dWw0o	SHMT1	0.317821506196437	0.0164741315832896	19.2921553764216	9.09650034737689e-16	0.0409273021606133
Z5akqeiehIJS5fwtP4	MVB12A	0.0855212317439262	0.0112327705326904	7.61354747655854	9.09385272124214e-09	0.022939208179027
x4oS9Ioo9IYu2ebi6U	LTBP3	0.176537576204983	0.0463242109110881	3.81091383388739	9.09349927408703e-05	0.0586126163536195
TC7Vlk3X0mYlFj7EsA	PTS	0.123854760589136	0.0324977114894022	3.81118407767041	9.08634920731743e-05	0.0396354597528366
i5LJNfsTsnKIH7HCVI	DHRS4-AS1	0.175182437529859	0.0230080510104378	7.61396249731828	9.08625903983985e-09	0.0473381809922801
Ep7FbYOi.43Z4v6L6o	ZNF419	0.137329428973203	0.0210477089640563	6.524673502837	9.08522302150021e-08	0.0323227665613805
6eoV0IoMUfO8R15HAo	HECW2	6.97595597738305	0.0484922730648482	143.857062919162	9.08346061360045e-34	0.240025917950091
cuJRM_ovcj_Lg6SgKk	TRIT1	0.255361321400478	0.0251643802142982	10.1477294185606	9.08234880768301e-11	0.0383312084041347
Bhkvq.dMLNcvTsTWDk	MTPN	0.14434529229863	0.0163707006443945	8.81729471658592	9.08080360499348e-10	0.0213471817003825
oBxen_okdRRzqTeirU	MOGS	0.142383888491148	0.0257173227951575	5.53649731059716	9.07550296015129e-07	0.0407521283060086
NiSbvSojRJdd5TdTXQ	SNX29P2	0.377712609330293	0.0496038679521665	7.61457976814479	9.07497699893319e-09	0.0665917708105175
KVKklX_6VKMNBHvd3s	RGS16	1.06796763947193	0.080580283353597	13.2534609587503	9.07481564877858e-13	0.0906708674020139
NB0n6ve5113fXMgR7k	IFT57	0.188284397094221	0.0247262125116199	7.61476902318696	9.07152085639187e-09	0.0572544939982177
oiqXFSCXX4FLeQV53M	LZTR1	0.0555506158442991	0.0119810817011346	4.63652758824259	9.0665997964916e-06	0.0175664849900685
QXrTXDDqOKgv1JI.Sk	CD2AP	0.0873874075873299	0.0157825853952639	5.53695135484922	9.06544111240632e-07	0.0270512229317253
xIp4p7rnhHnpj85J6U	GPAA1	0.19639855423604	0.0193516046754159	10.1489544422919	9.06405818825552e-11	0.0435027534868084
QQ4tXoGUjm4DoIgf5Y	VIM	1.66139946939658	0.0973278885311071	17.0701275294344	9.06388588009843e-15	0.0683265227382025
rhdeendlRQULvEJVIM	SRM	0.154802382070116	0.0406074914606975	3.812163137926	9.0604940338194e-05	0.0325991199310912
960K2Qn564AoVRgu_g	HPRT1	0.126238550687326	0.0272250737937532	4.63684879768045	9.05880887933648e-06	0.0242628845977343
3ep7rP6uN.E99IdO7s	IRAK3	1.3455255576845	0.022208805386392	60.5852288889408	9.05703658092358e-26	0.0990591742848132
9HH0g1JJ3V0k1fApUE	INTS12	0.0950646484287331	0.0107798359180819	8.81874725655831	9.05681593487077e-10	0.0203131204406153
KYiXiWoXopFIr0oicQ	BAG6	0.144488599611403	0.0189727002047463	7.6156054779834	9.05626210119406e-09	0.0312782876688009
Hnle6t_dDHvTF6IiCs	TTC31	0.0405362144450019	0.0106327932550682	3.81237681130309	9.05486143510558e-05	0.0191784345569432
uikKhU1ylZ.fliUJJ8	ZFYVE27	0.0932216977281024	0.0244512596236798	3.81255195694793	9.05024715830552e-05	0.0412735448889177
EhSABCutGFUl9O5iGk	C21orf33	0.138801648231709	0.0212675099607041	6.52646447506887	9.04916428814681e-08	0.0374301863694523
iJJewHoBHrdJQXXSpk	SRGAP2	0.190204783658973	0.0410157424643926	4.63736049211099	9.04641211289754e-06	0.0644097073553826
6Kil8SHh.HwIoZtHZ4	GLTSCR1L	0.0915658614635772	0.0120220284100774	7.61650682731901	9.03984949386576e-09	0.0239307857792143
x6PY6h.qhe7Xsj2AOo	PRAMEF9	0.179202679174198	0.0469980063119822	3.81298470374711	9.03885670675993e-05	0.0695651057112172
ipWbdgqkXuB0Ap3.SI	HIST2H2AA3	2.32686597779716	0.0535497923438021	43.4523809701845	9.03864315172108e-23	0.093057021559023
rnXl3dUE79SQsjlXu4	ASXL1	0.264253476941018	0.0154780377795673	17.0728021668135	9.03749821717929e-15	0.0423428235747737
BNFEdVUl9F6U4KF.4U	SH3BGRL3	0.0799646662785866	0.0122512005256581	6.52708819116249	9.03664167549201e-08	0.0217284956094528
QRUS9J6e_P9HkHeX_4	RIOK1	0.079590508869413	0.0171608119932627	4.63792208088173	9.03282683420159e-06	0.0263727589912159
0XhG30JIIIkAEkl0n0	PTPN13	3.77079364710741	0.0622301527970987	60.5943176678689	9.02860290194298e-26	0.226146798536353
KVTueeLpQjjlKeVzEc	SELO	0.120346456701891	0.0184364513239244	6.52763672289368	9.02564349706469e-08	0.0355966070804108
WmgCXaXll9Rb09yJAQ	TERC	0.294801427325254	0.0635577023302756	4.63832732330894	9.02303685692211e-06	0.0815839628137145
ruiqTsoSq9w8e3uIvE	CA13	0.326858542916993	0.0429092038994439	7.61744598391929	9.02278145981179e-09	0.0783327544635977
KdBVGQvXieBOiQqirg	NOL3	0.22798796338956	0.0597829184968452	3.81359707960044	9.02276351386533e-05	0.0632217031361215
HTpQGxQgLajbawMahU	RPL37A	0.0615763076322131	0.00808354662056327	7.61748654675569	9.02204503710525e-09	0.0119691062876928
rhUhIIDefVxTpz1JFU	OCRL	0.122460673301025	0.0160759486987372	7.61763275038596	9.01939121451437e-09	0.0409836948553532
iohT6U1KA.bEngMyko	UAP1	0.392435765541181	0.0444880675074788	8.82114660240545	9.01733718329694e-10	0.0499556663756117
B.we.lHnldFXlad6LE	NFE2L1	0.220550955084333	0.057829352490981	3.81382369997537	9.01681546087539e-05	0.0427737037809597
E85v9UldYNHh6pv_5U	LSM14A	0.0548872130648351	0.00840771329400132	6.52819751881831	9.01441383942087e-08	0.0155438392752007
uVueGDdTuNu1.dTueU	SNX29	0.392951882511066	0.0709384638536703	5.53933453255537	9.01281875710448e-07	0.0802044439679842
WnSV9cql3lf47X4nHc	PUDP	0.769008425531871	0.0101979957622659	75.407800067668	9.01261781390558e-28	0.0603140188108844
9Vu9RtOo91tFqKt_Bo	NOMO1	0.114950453028611	0.0301388180060443	3.81403321807637	9.01131989467999e-05	0.0477951364496572
f21noCeCHtl51g.W00	LAGE3	0.115143636567471	0.00764123831197806	15.0687142405933	9.00892491912351e-14	0.0235800969931608
HXeXV.lSl.dIez1Neo	SPRYD4	0.322460031391913	0.0695099103855382	4.63905117419059	9.00557723918773e-06	0.0589499998931548
cgXgGuolSLM4jt9Ip0	PCM1	0.0795931021295557	0.0104474515109461	7.61842273650791	9.00506582146468e-09	0.0175812104934982
Nt6oCnXu__JeUL7q5I	SCARNA16	2.24190111091704	0.0724762743701229	30.9328967362211	9.00228089827668e-20	0.155913602755799
991T4SiR_leXxeUJUc	AIP	0.148994694523635	0.0168886517524767	8.8221781529591	9.00041933854559e-10	0.0280603892702596
reigUTMEfB9VxXlXVQ	NR2F2	0.323816127944836	0.0425024833448696	7.61875783392133	8.99899642718297e-09	0.0786421169965601
HC3el0wCunurbSg3mU	ZNF581	0.250489249555215	0.0188903355869146	13.2601799688899	8.99345391855643e-13	0.0326116726594456
ZdSFUni1B4DQ5biEn4	NOL4	0.963029183578107	0.0726235112738071	13.260570394996	8.98874966833792e-13	0.140114664551439
QUUtJIOgnyKB_XuJno	INSIG1	0.113881695595891	0.0129074815473722	8.82292143342833	8.98824977739552e-10	0.0193811710264042
ing5LjvNLSPf1_nS_4	USP14	0.117122387206902	0.0307005032697279	3.81499893268492	8.98603437064779e-05	0.0363578750168838
c6IkYvL7LWn5rqnh9c	BCAP31	0.068045989479443	0.0104211148369777	6.52962668043849	8.98586138288846e-08	0.0181554247989249
NtP3xVOe9XohV7o90k	FASTKD3	0.0602963574848976	0.0129947282036154	4.64006299632509	8.98123038925325e-06	0.0216116052270466
cXSOUqt53JNLCz8kgE	SSR1	0.102327665634554	0.022053066995763	4.64006506007597	8.98118080039444e-06	0.0217560677648892
HqNB7GX_s3hTAt.51k	ZMPSTE24	0.170990228345224	0.0224399435601835	7.61990456378074	8.97825874670742e-09	0.0273087149170092
3CdSt82zV_U3gfv5Hk	AKAP7	2.01917182498796	0.0732640797137941	27.5601881969425	8.97682282920793e-19	0.1450654737859
NUuorH4NPmuv1Xuc90	GYPE	0.718047120485524	0.0207006999343214	34.6870938066695	8.9706272700211e-21	0.0947204826417755
9VI6FKByREXk0kAv0U	ECD	0.0514846063899784	0.0134929556003048	3.81566558988864	8.96862195029054e-05	0.0203947695066435
6txq5SNLKl7j9e0u10	FOXO3	2.15348740549601	0.0443120911114141	48.5981896020544	8.96661440378753e-24	0.119192386719499
imM9It1UhaS006S.SY	FILIP1L	0.35550895284566	0.0466508667414975	7.62062910461261	8.96518171674817e-09	0.0735156883730493
c1F1N9.kl6unOrH26U	MYL2	0.851016747536716	0.0440777718117995	19.3071635102231	8.96335524468099e-16	0.107052048767384
NFqix0hPQHMV1f6CAk	GINM1	0.21492459036687	0.0282022761124584	7.62082427353891	8.96166256658268e-09	0.0431017657431225
TlO74I4D6TS7Ia54_o	ARL5B	0.264085007913413	0.0476526209839315	5.54187791690331	8.95700945245472e-07	0.0580620604351311
KSQ5qAnxLTVb0fYITg	ZNF426	0.157824743061966	0.0241647772408777	6.53118965214321	8.95474348242362e-08	0.0425703613534913
QUv4FekeUbMkeSX6gI	PUS7L	0.109115498473893	0.0196887458594102	5.54202381670447	8.95381891097019e-07	0.0334489453507213
Q_cW4BfxcjSU0l7QdI	EIF3L	0.0449671540256987	0.00589992691124669	7.62164594615238	8.94686253428381e-09	0.0106281637387667
oKZ9UH0x6SiriivR4k	ETV4	0.536704659280471	0.0461442928515125	11.631008432777	8.94553802908741e-12	0.0857397980137267
f3hJdCgokuXu0lOqV8	TRMT61A	0.124679970864822	0.0326672048510589	3.81667092220719	8.94242962854065e-05	0.0430738794307503
xILrSgQ00ldd6moNIk	RIMS2	0.569995411694381	0.0645808667250932	8.82607249792307	8.93684854685373e-10	0.109120562428289
HdFqAe4GnTrE9CP7uI	CASP6	0.255060287944244	0.0149299564329499	17.0837931838391	8.92990204491888e-15	0.043108097885279
ujqfgjiLogjorgjlLk	HERPUD2	0.262635965173605	0.0197984468860526	13.265483231345	8.92977404060917e-13	0.0514900838198406
B596S6197WXl7vp5Ng	LST1	0.665564874602192	0.0501713108396249	13.2658458283002	8.92543733364872e-13	0.104685321682971
uXekwOrwxcrji_Mrko	CTSC	0.277872170661411	0.04253559536956	6.53269733848057	8.92483268975173e-08	0.0656657800025332
ZVeFV6nhQDuf3HuLVw	HYOU1	0.555199133893395	0.0546543145286998	10.1583770408803	8.92465033154768e-11	0.0670463211064117
E5fUedfzh5H3JSyd5E	PLA2G4C	2.43376430049471	0.0786442454918287	30.9465020011869	8.92333541168657e-20	0.147473804362117
ilHJEoJ0oYKSbyiDL4	SNX29	0.815858084741306	0.061499774965948	13.2660336593596	8.92319171482035e-13	0.108248219048497
3U8Xo7.7Ueoikn66KU	PHF2	0.0772171033614425	0.013929373091783	5.54347297991418	8.92219270678988e-07	0.0286342485237241
looq4jn95P344S.u9c	PRDM8	0.600024749534242	0.0310700388472426	19.3120051276503	8.92083849847455e-16	0.100604643151101
f2eKp70UU1291KtCgs	TIMM22	0.741902247725374	0.012236719119624	60.6291801317551	8.92040042163673e-26	0.0635369485157106
finrhvSX_0MBe07mjU	GPER1	1.10399232107508	0.0450132837604854	24.5259227686963	8.9174771439789e-18	0.0744251775982158
iNSrSUu_AiE.7cXpHk	ZMYM6	0.107217743305121	0.0121461203683962	8.82732428571168	8.91651419801651e-10	0.0221935395240639
cX4LnsUuenkrPC1C.M	BAZ1A	0.0903642999447619	0.016300254099682	5.54373566155172	8.91647246092486e-07	0.0207134474866618
BkiUXXMhlT5XnnsR9I	PRELID3B	0.104236002335381	0.0188021107987522	5.54384576556683	8.91407593324613e-07	0.0245222445269472
ouVLarp4nrXwyvv360	DAAM2	1.02004179157356	0.0293973927700608	34.6983761298861	8.91179991193185e-21	0.127685871514577
BKn_Vf97C3fqNe7IJ4	RAB10	0.0488504422931861	0.00747689377562793	6.53352097262923	8.90853671462485e-08	0.0134287797446991
opLIq5393IogH5SiEI	ZUFSP	0.0815591670513568	0.0106979781019799	7.62379267127702	8.90831574849624e-09	0.0228640544201629
EK.h0Lunsep0Ip9F3o	TRIM69	1.22449973638853	0.049923374298885	24.5275835935608	8.90567553423788e-18	0.086170638801957
T4Hr0KZtcVLT.fxfMc	PSME3	0.172016081604732	0.0450513473669863	3.8182227981662	8.90215318311916e-05	0.0353780456660311
EqRmeR1sHQTpOX93Ww	CYFIP1	0.319191078972015	0.0186806784555519	17.0866962745216	8.90170642861927e-15	0.0453764145392446
cyYSYSaIYqY4MYYT7o	NFKBIB	0.192430193886042	0.0252392049999525	7.62425733640993	8.89999501126435e-09	0.042135639025602
fHhKAX1tuKiR9Uqlko	VWA1	0.362834806978397	0.0781381183671544	4.64350581458225	8.89889864921658e-06	0.0907834505077202
QenSDz7TKdcHvXXn3I	GAPT	1.42907098613757	0.0518295469173697	27.5725155077256	8.8976623086946e-19	0.153974186476552
33oj15BdCIfVKZ0peg	GPRC5C	1.41184202444098	0.0826247632796171	17.0873956959254	8.8949273727263e-15	0.108518129440888
N0qXoC3fUvTSrLIXtI	MRFAP1L1	0.0452823994756152	0.00593897683222074	7.62461291816202	8.89363310104907e-09	0.013807141061862
WeSdsiWBqKiAIJEhAE	GFM2	0.0905225719465962	0.0237054126431221	3.81864569536866	8.89121012491812e-05	0.0423303758027242
KWuXa0d6qS.I57gPAU	GSE1	0.158631591086993	0.0242759028179481	6.53452900502265	8.88863452846706e-08	0.0338502322774259
9tFX0HokoaCvt7H6io	ACP2	0.815600329750099	0.0295780918248165	27.5744741946401	8.88515182595992e-19	0.0820870569335577
0yoSKKWA1dVTn14V_8	SH2B1	0.0868617405433038	0.0227451583920727	3.81891121820358	8.88434645911593e-05	0.0377423103012349
Boq4S6WVClRifvf738	CCR7	1.65527426517288	0.0380619425212392	43.4889591945867	8.88353049718707e-23	0.0686459994032197
xlBPS3rO4pubgkIHXo	ADGRG1	0.670292697712064	0.102572210569907	6.53483720383732	8.88255882894697e-08	0.108468288804147
9jpVlCSOeQEnAe0z54	CLPX	0.0801125378504728	0.00688498668216288	11.6358304741565	8.88172724654914e-12	0.022014983708814
3HlR305eUB_qQ_OcDo	TICAM2	0.218527991803367	0.0187802008758916	11.636083833581	8.87838767883336e-12	0.0408141041710505
9RrkTnpPQTugJ_3yKk	PRKCB	0.463075637061393	0.0133432518729489	34.7048561677979	8.87819469190263e-21	0.0411629609580415
i21k654OnihfVLdVIs	MYL6	0.104705823537122	0.0137310124669284	7.62549912392182	8.87779813811493e-09	0.0160985238055851
ciRII6gR66KOgKdnQ0	BCL2	0.230715490512798	0.0261291740558109	8.82980418822268	8.87637252462403e-10	0.0322141911199166
Qk_6e0DU7tVXut7u4Q	SLC25A1	0.110228069961524	0.0237308764660261	4.64492199094837	8.86525997127832e-06	0.0305874358334152
TSnePcugokveLdSgsk	PNISR	0.132019855575242	0.0345632258378859	3.81966244107142	8.86495729448774e-05	0.0284618854503622
KZG_akiZCkxFIAZ7Xs	HNRNPDL	0.212622331712243	0.0325313063644797	6.5359297081411	8.86105650793524e-08	0.03270510248809
KU4iO7ULzcg4BGfmqI	GCSAM	0.596003539029255	0.0273508775130036	21.791020735839	8.85926542801549e-17	0.0823704217815394
K9jjedE9ed3Fx9_s9Y	CWF19L2	0.0321076074361626	0.00840526141916646	3.81994156219197	8.85776429500266e-05	0.0172535867302782
BoEXXQFxR0oO.nqlgI	C5	0.148426232162339	0.0194613707655028	7.62671005813421	8.85620837402159e-09	0.0409446001635787
iVT2u65LuALX4_9q7k	RBL2	0.148881911282821	0.0168584358511044	8.83130040045016	8.85224491828162e-10	0.0298535881708048
KSbk7vQl8j6Y7bP9dE	TLR7	0.663344457916749	0.0240512168567639	27.5804946530261	8.84681307186199e-19	0.0527318444821298
olk1zp3H_IasXq7Ne4	ADTRP	4.68413626663157	0.120492225623564	38.8750082620727	8.84680962829607e-22	0.246252752913428
Nk63nfuC_.jVuA3VI4	METTL25	0.256649909597143	0.0117767518128383	21.7929284471597	8.84432694416128e-17	0.0402093753241659
rXAbK5ElJuBzCiVFdk	SGOL1	0.154269912607649	0.0332062572058393	4.64580851889928	8.84426934274355e-06	0.0409336652608219
rSd7BdW_bQtwFCPO4c	FHL2	2.27556399957175	0.117777351515131	19.3208963378617	8.84330822248394e-16	0.127628457053531
WiSNevh5IhF_CzqvZE	GAD1	0.527431007255026	0.0518922811739403	10.1639587877647	8.84312575321058e-11	0.104387280659933
QDCt7uARE7qrino8C4	KCTD1	0.223844702793578	0.0481782159182975	4.64618082108276	8.83546960823735e-06	0.0697026906683111
EqVlAHqXPs3qm8SuB4	GRIA3	0.253510973270884	0.0663491055966279	3.8208649685817	8.83401093554882e-05	0.0814974211736475
iuBoeRv7xCogjzop5M	ZNF16	0.205633781642769	0.0370670736946899	5.54761304699992	8.83247972339115e-07	0.0502052529497368
0SecnSEUCqwpUoT0zc	PLEKHA7	0.180907375739894	0.047344182759463	3.82111096222766	8.8276942057234e-05	0.0660924505272448
oeEuIRBveB7irtUoAI	FAM81A	0.887372174069015	0.058822701263599	15.0855393412227	8.827637153336e-14	0.0865168342685997
0iDR_NUopor5LieI24	LOC642947	0.280657992876454	0.0604013033374812	4.64655524580867	8.82662887394105e-06	0.0302704451779939
HSEoBK4uv4Po5LupTU	EPHB1	3.70900002841771	0.0440802467364794	84.1419979019369	8.82367631293971e-29	0.1465340638835
HVQfZXlR_H0UDV9eiE	ID3	1.13277958128912	0.0519712465061992	21.7962750066809	8.81818501398769e-17	0.0705865375864119
ilet45VBHlfn_.1e0U	PPM1M	0.320116230623944	0.0116042574634411	27.5861020519806	8.81126023272682e-19	0.0396628095668467
utFe59eVCMeFT4FVAk	KIF13B	0.206577655163092	0.0155605042714009	13.2757686743332	8.80760885064178e-13	0.0397723674798279
iSPq6y6ivuTopS4CeE	RPN1	0.148653320605343	0.0319848542303496	4.64761601021429	8.80163245855276e-06	0.0248213767883882
K6JUquOiH.jp.6SoSE	EXOC7	0.123285841181779	0.00928614245477776	13.2763245644964	8.80105621341402e-13	0.0244737412027618
3q3JE7RX7Ub79E3ryo	CLIC6	3.81336984594868	0.0365113721723965	104.443345156764	8.79914127211759e-31	0.119990561202666
uXVfUdJHNSkooUAqHQ	TMCO6	0.0623454010217329	0.0163112332474988	3.82223710958784	8.79883609584139e-05	0.0340904640491169
H7rkSfuKKkK_4b2J8s	CHL1	3.13326411090056	0.0195468597369511	160.29501173416	8.79797001111034e-35	0.190290605841153
9go67XHujio4EKo6f4	TSC22D3	0.808434925400772	0.0694396327302774	11.6422696033108	8.79725776460483e-12	0.0596998062034977
Z_5NCdNll69uVhNXS0	ANO9	0.185023082741618	0.0333418028518408	5.54928248972606	8.79656989003318e-07	0.0547778964519179
HlSi9AnsuJ7T7lHNdQ	DBT	0.0686920451521827	0.0147790999630282	4.64791802775709	8.79452900809857e-06	0.0208846926239415
i9X5RV9G5FdD9RD0fg	MSRB2	0.160157030315957	0.0157519851157518	10.1674188452477	8.79298041508532e-11	0.0275007820460993
Wpqpan6BjsYxXTLhTw	NSMF	0.18582276127974	0.0243527801629321	7.63045369097466	8.78980879840374e-09	0.0338249593104839
ijikS746pLhSEteIVI	AGFG2	0.163639331843038	0.035203623807917	4.64836610957754	8.78400109228495e-06	0.0484400068906847
WVH3uJJyTf3fedelR4	KIAA0226	0.196407597465105	0.030032141583991	6.53991314325058	8.78311418960656e-08	0.0485426447100561
xXJCQUrjnjAeetKh04	ATP1A1-AS1	0.16985960066004	0.0222596158765168	7.63084150249136	8.78296006125389e-09	0.0439667507117665
cXUDd_ftPh35u0P1dI	INTS6	0.0943364837817945	0.00810209502217606	11.6434679578045	8.78163040167006e-12	0.0204752970733203
Eud7FLnTTV99MUGtXI	PHF3	0.0676732679942338	0.0145574266876229	4.64871089144974	8.77590917171832e-06	0.0183214259011843
BADyUpuum7l7DVJB0o	LINC00114	0.466298050875687	0.121960562918654	3.82335108757	8.77038580789976e-05	0.0468985048470625
3wjozj9AAypama6dGU	ZMAT3	0.454822309737557	0.0595975149002837	7.63156501573176	8.77019771966659e-09	0.0389772620572815
WEinrr4jlRpwkXunk8	CEP131	0.0962762509632431	0.0207086614285945	4.64908131774779	8.76722400934225e-06	0.0271767707959744
cqMgq.kOUzz66Knv8E	ISOC1	0.178957009912738	0.0134763768240326	13.2793118098034	8.76593073732723e-13	0.0284165915339668
cZUqab.lwTUpb3vFAg	HIST2H2AC	1.27544186714218	0.0262158550089215	48.6515456660916	8.76508012922294e-24	0.0675150267378525
fov6B3FesoCRZJO6oI	ATP1A1	0.0844894000423829	0.00725541615703305	11.6450108737709	8.7615524106979e-12	0.0151886685536459
BVoseqPjv0KUNDqOfY	LRRC3	0.112812793136833	0.0203227455526283	5.55106064998401	8.75848859869776e-07	0.0463240952131639
uUi6XlzRBRNX1VRCkM	HLA-DMA	0.345725734612263	0.01585606695407	21.8040032003977	8.7581237063619e-17	0.028952362017846
0EO.TeqB4nKa4ryXlI	TLR6	0.183515149698563	0.0280550218875258	6.54125847537335	8.75695228794724e-08	0.0490397188997651
ukdrkmvOfOAMXpJ.uQ	WRNIP1	0.0676259965073836	0.00448080283971737	15.0923838710228	8.75498298798911e-14	0.0165778660193502
Hn6t5rhXOT19Ln5yBI	SNORA9	1.60799610234589	0.10654326381643	15.0924239106885	8.75455981303751e-14	0.15153736635775
H5R0I6ARTlCk.68xEg	UBASH3B	0.591588664705814	0.0507995182440223	11.6455565949275	8.75446241621555e-12	0.112213369880648
Z_U0Kqhj8UCVCHmXXU	ATP6AP1L	0.164033142932897	0.0352779754806429	4.64973232443291	8.75198186657953e-06	0.0517262409327197
udXqMJHVJVvzSARKQo	MAU2	0.0838827285009338	0.0128230631258164	6.5415515526906	8.75126376269007e-08	0.0277189340928519
iXu4qRBSlGoX3Nd7P4	GSS	0.0542723720113792	0.0141921746509847	3.82410542049056	8.75117466121628e-05	0.0230422647541342
0fgCjvrl87hGJSJeeo	NEMP1	0.175156332000589	0.015040029851254	11.6460095979122	8.74858156578891e-12	0.0327548249503813
uRDOULMF6.byK7cS1I	NEK1	0.0987327361817289	0.0258174332353974	3.82426615696094	8.74708669591154e-05	0.0325799708204819
6l.js.1XQjzQe7vYS4	CLIP1	0.283130007287095	0.0187584306311719	15.0934805183863	8.74340035951611e-14	0.0382736507301534
ikf0xkpN37xcTcJ71Y	TSEN2	0.456988460157688	0.0598692915635914	7.63310285160612	8.7431354270695e-09	0.0573689863421128
H9N_3W150AF9Lp1UuU	SMPDL3B	0.749417015333945	0.098176483992932	7.63336580059129	8.73851687116336e-09	0.133149772791051
915l9eG4leJjfc5L3k	ATP6V1B2	0.0746837090422612	0.00494788664905925	15.0940622409895	8.73726279135264e-14	0.0165252792438589
x3k3jXqO1yUU6f1J4k	ACOT7	0.315128740686774	0.0481676262999477	6.54233486043958	8.73607893486717e-08	0.0800804351273886
TRS4ViV1EUl17N00rU	PPFIA4	0.710793494029817	0.185839830765719	3.82476399758396	8.73443778200686e-05	0.10635135860572
cElqXjt0Jew1yR.qKQ	PTGR2	0.411829520963479	0.0741733186915748	5.55225960261986	8.73290856303851e-07	0.0718138953959661
31IB6o6Dch_4mmuuXk	HOOK1	1.8570144774443	0.0599412391552174	30.9805820436173	8.72874400466492e-20	0.113368955409739
fSUyR.vR7Xu0iR4nUU	TXNIP	1.56607403202476	0.056743044821109	27.5994007188379	8.7275379205698e-19	0.0754561109262415
oCfVU5f5XV.Ee3lptA	LRRC26	1.72919906097787	0.0792912792029246	21.8081872100014	8.72578533659498e-17	0.10534837695814
fXnqgt6JV54hj_gt28	UGGT2	0.300459249585157	0.0257951731673817	11.6478865109962	8.724259553739e-12	0.0507009823798785
uOq6EEW0haiFKknfRI	HJURP	0.183857859440575	0.0331115983374511	5.55267243721731	8.72411861136725e-07	0.0369939703072891
rkT.iTt6sU65o5_oFI	LITAF	0.12773779621372	0.00846201407120831	15.0954365165077	8.72278112567174e-14	0.0190692746252792
rHpApylaJFcpno.6hA	ANKRD9	0.285084811374561	0.032250646505425	8.8396619065173	8.71866339085342e-10	0.0469594926680631
658vdHt163ueV53qjk	INPPL1	0.123341733939149	0.0265180278538148	4.65124083205175	8.71676854750824e-06	0.0284058670300524
ciUoKIeRL.gJElbStY	RBCK1	0.111122624210115	0.0145551005575919	7.63461741610259	8.71656778722638e-09	0.0236067034213235
ipSSBSVQlJF.rAwJJM	ATP13A1	0.339971848300425	0.0175824869142661	19.3358226261257	8.71473223298986e-16	0.0426255502316992
0uEhHXkFS.1JRS6jjo	COA1	0.162390143185418	0.0139402574277004	11.6490060551347	8.70978555908937e-12	0.0246716398780286
lmnqOn.tH30oVX9R6c	BCL2L10	0.674320418952199	0.0309172323727335	21.8105039552924	8.70793283212156e-17	0.0853946521717119
fEUKS0vCknOv6ApMaE	SLC7A6	0.147310075381323	0.0225112639329442	6.54383848992777	8.70700719366959e-08	0.0380148194597022
6tTcTr_2qE.B06K5.I	NIFK	0.128140704186406	0.0230738256108013	5.55350925970511	8.70632947227273e-07	0.0252666112013994
6l9Xbj0RR7VP6LxMfo	RNLS	0.0993562249759174	0.0112387569797243	8.84049945693855	8.70539930345798e-10	0.0351721712332398
TGtKt9_YVpWdSNVEnc	UNC93B1	0.300262065632384	0.0198884980253232	15.0972720639875	8.70347783737073e-14	0.041280622963445
fbqB53X_SVT9UJ3vQs	PMEPA1	0.884663290842777	0.0585967481198784	15.0974809904624	8.7012835213768e-14	0.128928286581028
xjfQJ55qT3O1X17SNI	ALG9	0.0634969908184493	0.00718211717360438	8.84098508609865	8.6977181579733e-10	0.0194193948076087
KLiUJIKK6AGhUBVLuU	GDI1	0.110431844070505	0.0168743525845695	6.54436035498557	8.69694084204406e-08	0.0305383108117742
QuXm7AUSXSFJzqiKEE	FSTL3	1.77199899826092	0.0721565685932771	24.5576949237858	8.69451605504151e-18	0.152127462534684
Kr5CeIE1IriHSET4C4	OSBPL2	0.267790302538303	0.0699832848660607	3.8264894688899	8.69074397672724e-05	0.0768730285976425
cCFblJqbulmr9ka1DA	FKBP2	0.137034078703109	0.0294532110671527	4.65260233903441	8.68511299324972e-06	0.0536180296096154
xW9WJgJx2UqOFOJu44	SSBP4	0.218222259254201	0.0214469814465168	10.174963772799	8.68466145683574e-11	0.0397146239719373
xSSFiJ59Tf1OC3S.FQ	ST7	0.507777590732801	0.0163859377959096	30.9886194526843	8.68350146774719e-20	0.0512483181734846
0B2unl2eOJ63mNeDqo	IFI6	2.69764384715687	0.0619617008493142	43.537278838057	8.68288156795275e-23	0.100771183046024
iSUInirCpKym4p7oT8	CALM3	0.0876696637627279	0.00752433717680953	11.6514799513413	8.6778907407452e-12	0.0149629164039031
Hd1yqCDNEpwybr6q4I	RAB11FIP1	0.246921078381145	0.0279243390181429	8.8425039611758	8.67373989970752e-10	0.0526943225859131
0u71NDlORUHazP_noo	WDR76	0.127087081842745	0.0332065337405743	3.82717096688294	8.67354885178601e-05	0.0435289647616688
xl7UnV3VQgEE4OJB9I	GBP2	0.776322777242136	0.0223434047902113	34.7450527138212	8.67267496678273e-21	0.0493280714425143
EP5e.efnftcn6in1XQ	CCL5	0.494620873918325	0.0647652254084481	7.6371366084029	8.67256389856768e-09	0.0509908275564185
Q5Qolv95e0AUTSN354	UGP2	0.0244411057550544	0.00525259540008432	4.65314837587948	8.67245098746481e-06	0.0104270807533152
ZqygilO.S9v93sq2Pg	GCNT1	1.86274808793304	0.042782256227366	43.5402022285473	8.67089510841326e-23	0.125041674145349
uRtdb4RJ93ohXIKaTs	TCEA2	0.307030489612328	0.0469047609312758	6.54582783317422	8.66869933827233e-08	0.0557197953259707
69KffSiAkLEesX6HuQ	SLC25A20	0.104932909473119	0.0225500524765905	4.65333327193147	8.66816779281069e-06	0.0394780794297748
9pf6lHvSrHhTS7STyo	TMED2	0.181234979740236	0.0389465725766001	4.65342564827195	8.66602867902563e-06	0.0288193885720032
6dIvrulxenMTfTV1UU	DDRGK1	0.0432367092501711	0.00778279549905307	5.555421474897	8.66582122580193e-07	0.0161404082086214
KEo_geY1_sUS0SB6q0	TRIM9	0.344205080211363	0.0739635601156052	4.6537116341259	8.6594097189417e-06	0.0919376519110695
T4.6rJDUogrnoirg5Y	PSME2	0.136194605275617	0.0208043640560067	6.54644404938176	8.65686881463877e-08	0.0198837292075891
lX0VIRusqOgCj30SJE	PHF5A	0.102572966282521	0.0220403785958675	4.65386589601292	8.65584160567001e-06	0.0339382320973458
ZUPt15yQzuUQThLfuE	NLGN4Y	2.76454612969607	0.0891966980845334	30.9938169132232	8.65437555424993e-20	0.24203831134969
uiu.k7pTxbT6XuCT6E	MYCBP2	0.107557547131322	0.016429481302584	6.54661855419658	8.65352161475058e-08	0.0233599157294453
Wku0qstUTHAj7dFZLk	RFXAP	0.0943715033107531	0.0123549176417695	7.63837575021154	8.65100432424358e-09	0.0308809289964732
Qp2AIk4iJUiooIJSOE	ST13P4	0.109729503773038	0.0235767488400167	4.65414059069904	8.64949163297916e-06	0.0335264380881385
ivdSKCuggFOpKLKD4s	GBP1	1.11844738638527	0.0959697046802714	11.6541713878504	8.64332979629963e-12	0.0736397388621194
H5FSfRwS6ngBNfq_Ls	GLUD1	0.0581153106115395	0.0124860610546445	4.65441505989768	8.64315170377905e-06	0.016366992029745
630Xr1xXbVxe141614	SCNN1B	0.50408860522506	0.0769933271984062	6.54717263907897	8.64290257721538e-08	0.106567682341023
ojk4RCsIeUAN_9_d10	MS4A1	0.914143650477944	0.139619525228957	6.54739119746232	8.63871764131121e-08	0.082251772549692
cIt_mP6VhmdZ.ZxJOs	ATP5EP2	0.0218287790762447	0.00570128628847676	3.82874635156705	8.63393428787823e-05	0.00822684120634802
31TUc8ORyuooippDhE	ETHE1	0.134302232999646	0.0350762392060744	3.82886637904977	8.63092376297767e-05	0.049560205856116
BiCTldXtT_3zBOFSVw	CD200	0.765717732385153	0.0311686278305619	24.566937516394	8.6307561214874e-18	0.087334917682305
621XukIyO6_pTbq9Xg	KIF16B	0.312494910348649	0.0409033329910815	7.63983977581449	8.62560407179105e-09	0.081817421042945
Ztap5fWYSCAChFjlAI	DIAPH3	0.237139285026075	0.0178414341686337	13.29149230856	8.62421565204773e-13	0.0486474778334646
iHXTXVINxS.OsgI6gU	SUCLG2	0.193956981558263	0.0253871545437379	7.63996537004992	8.62342868879728e-09	0.0318064459661285
ZXjugJKr963HpyJwoI	SLC7A7	1.46800951788544	0.0113289128609123	129.58079348906	8.62011492761362e-33	0.0912356913455523
63v4t.ogLr9PsrEy5E	TMEM128	1.06791215816597	0.0916168416906349	11.6562865348711	8.61626993454513e-12	0.116397420402054
fuaP7h95zhef3nqhOk	PLEKHF2	0.236331234914502	0.0267152480653811	8.84630508899339	8.61403396438557e-10	0.0517848380977585
xve7nuGHtAizelOmhE	VPS41	0.0689351723477514	0.00677160520513986	10.1800341661129	8.61265175942758e-11	0.0164075507269359
KhyFD7Tn4RB57p6_uc	CA2	6.20684806605491	0.114101137483895	54.3977755430437	8.61126063600167e-25	0.177323202555987
ZiVKkevM9LKAeB0kdI	SNRNP48	0.236158197779879	0.0360605852776931	6.54892858674608	8.60933946378204e-08	0.0599798735916473
xoBfXyLXvnS7rU0hrI	SLC25A17	0.305210014830492	0.00878099592373892	34.7580180518447	8.60745063441412e-21	0.0454887884492371
r26tXoRpfglBff6KJA	KIAA0195	0.0872775823883812	0.0227884979217135	3.82989623485543	8.60513753418946e-05	0.0389290671042525
xpynel6kdFV6fIRfdA	C9orf16	0.198022353218828	0.0223829672832095	8.84701079679344	8.60299640763949e-10	0.0500049821829411
ood7Xu0Xd1K7Unt05c	PLEKHF1	0.551686278525308	0.0365180500983353	15.1072216900885	8.59961783203612e-14	0.0542303318202956
9IHv4PklNV5VdUp4I0	SEC14L1	0.172763942596609	0.01952727016629	8.8473166564189	8.59821722522397e-10	0.0408580172680294
6pLPNBCtedLtSVWeL0	AP5S1	0.1402957705468	0.0301283478049377	4.65660352353632	8.59277296434459e-06	0.0414985803230593
xeeuSudt5.OV9RN79k	GPR18	3.32987441018743	0.0764433385650534	43.5600337804935	8.59003730021722e-23	0.199005275146027
il0V5OcojoXt3MSSyM	GALM	3.09779085655156	0.112150980966907	27.6216117758759	8.58955639169517e-19	0.173252020704553
i7k.0Xiv1eTV5LlAlU	GLB1	0.0709751233223183	0.00928759281776224	7.6419288307494	8.58949443855097e-09	0.0203200039715499
9131UeadVLaZ_ZogdI	PIGP	0.18713831824761	0.0285708338719516	6.54997747305256	8.58935592234559e-08	0.0396588215513859
BEB46LReQ3TNeug5To	GUCY1A3	2.13640738158999	0.0490444437219141	43.5606405019821	8.58757601914753e-23	0.165491343935856
ix2op4pKIOm4Faguic	KIAA0101	0.217517465057525	0.0284621446270025	7.6423427646827	8.58235826478218e-09	0.0227544906983811
9B3EjpMXuXn3qvoLuE	DIRC2	0.084291965231546	0.0180997841459519	4.65707019220991	8.58206968468959e-06	0.038179904233175
fiuenn78T3Xeqdxd1E	ABCC10	0.176266593813715	0.019920817615535	8.84836140843215	8.58191343411934e-10	0.0513610070451797
xfozx4CoquiOrukuzo	DHCR24	0.179108290412389	0.046753009128691	3.83094679359313	8.5789150157235e-05	0.0350618664251787
ZqSpvyx7dV.FJAXh9E	CMC2	0.0633622027616557	0.0136051829165057	4.65721064909647	8.57885094677636e-06	0.0156284462580241
EUox1eTjE3ukuAMS3I	GPR34	1.35798620105251	0.0491604297588538	27.6235624406424	8.57754771952108e-19	0.14047248484709
HR0Ih8yURBQ3efSHeo	NFIL3	1.24629516886082	0.0727941655567448	17.1208112536067	8.57725655288757e-15	0.113312703611333
WdK45HoN0koqrLyILw	NAP1L2	0.219598465608166	0.0287331022892532	7.642699468978	8.57621368451357e-09	0.0658719937217335
uWhno74XoYLseXwYf4	TRAK1	0.180186911246095	0.0275065206149917	6.55069806058599	8.57565519736245e-08	0.0510871762493969
xSMQcar7oifRLkmmLU	HLA-DRB4	1.68201392031109	0.0248170981202703	67.776414154451	8.57565026079312e-27	0.0639255524247522
xfn0viFxv_lLVJKCM0	NFATC3	0.179773745230524	0.0385998871510003	4.65736452874229	8.57532604915088e-06	0.0580535686417212
6.U5SL_7qamTuRRIuQ	SEC11A	0.0334672410017468	0.00718581682275736	4.65740246756035	8.57445722154303e-06	0.0118252556760648
Zl5rjUey5KT6md6Rfc	PTPN2	0.0819452405240977	0.021387930287481	3.83137776412442	8.5681816743013e-05	0.0269368849772159
BSUuUH2eUH_uU_v33o	MAGED1	0.247599768774687	0.0089628006107147	27.6252679858448	8.5670624311451e-19	0.0262592469191376
BI90n1UokIXeJWUJmk	MCM7	0.276495490025846	0.0721606587285219	3.83166527159985	8.56102901090145e-05	0.0557331175993876
lEUI557fz0BF6baUEk	EXOSC1	0.0616162418825386	0.00696246591224773	8.84977286196102	8.55993834107529e-10	0.0156534202185189
K9xXIrUKg9Krp5KlUY	TCEAL4	0.17394133666007	0.0227555079696351	7.64392238099791	8.55518264165047e-09	0.0365946685320885
xQSY9KFQu4EEdJWV3o	KCTD10	1.34586701461314	0.0115575428569521	116.449234172952	8.55469622476385e-32	0.096649251172942
T4CiS6Vm4_6T8KJLpU	TPK1	0.650928530315256	0.0264827716228993	24.5793204572442	8.54609761048878e-18	0.0618965950441245
x0h1eUX.Ver3lt_XR8	DPM2	0.0947295242104003	0.017033975414541	5.56121057504489	8.54437683030293e-07	0.0310962243371399
ouEuCE4I4icJJ16_Xo	THOC1	0.061622128765172	0.0132269739365801	4.65882287669382	8.54199446489814e-06	0.0212397505204595
Wh7fgTVA5RaBVJXydU	HRAS	0.180649496393817	0.0204096329070814	8.85118792759561	8.53796596286813e-10	0.0356825166013568
EVJetUzTLgOuXsCd0k	IL12RB1	0.25871688345835	0.0254006536444236	10.1854419606697	8.53653698770783e-11	0.0494254535614862
06CvPSuaE8UG7kqObU	KATNA1	0.0707735856172818	0.00694841095739229	10.1855785518827	8.53462358462498e-11	0.0202086017577236
Zm6KV6Hnnb38o6Hves	TMEM87A	0.0660902460192364	0.0172436427040779	3.83273112029902	8.53456646936161e-05	0.017278094703005
lAogJ15r2VIBHEZfSI	OGFRL1	0.564723888644174	0.0861795708288059	6.55287422776782	8.53441722829957e-08	0.103601003249998
fkk3XtVSU7T3J7gekY	KLF12	0.206731054179759	0.0371699514016833	5.56177897424953	8.5325487651889e-07	0.0664173643081675
oU.VH5F9O96RS6NJ_k	HINT3	0.078210058689284	0.020404554564684	3.83297064590907	8.52863125665015e-05	0.0327573128261688
QV5Q4iXb8XqeQyXALU	MYO1F	0.358509090434948	0.0405002366435575	8.85202458420641	8.52500250932219e-10	0.0874697807014837
6EhySnHqFwAre8O06U	PTPRG	0.590857942475122	0.066746950138018	8.85220884629722	8.52215024885255e-10	0.107924685965806
cqdet6d7XTuc7hXhAU	SYNGR1	0.918579313679961	0.0474492654979976	19.3591893159806	8.51735916477526e-16	0.125930955962895
ofCQXnSrRt1BKSyLQo	OLFML2A	0.871319055284838	0.0315300222903895	27.6345841832918	8.51002463946502e-19	0.127607020071387
QXiHpCoop4kgotNOig	ARMC5	0.0982947176751719	0.0256383493303637	3.83389415631219	8.50578749240638e-05	0.0405639096040904
fVLYgTfsJfTwqUXnt4	ZNF518B	0.0804634897535061	0.0122756057137409	6.55474700229562	8.49909396060489e-08	0.0236769060919678
BCSaF6nve74KLuVLlc	AP3D1	0.0948943487656179	0.0247495361541149	3.83418695908935	8.49855800269685e-05	0.0280514663107004
3sef0u71V0lXWm7Skw	C14orf2	0.13563312170647	0.0133127667733602	10.1881993439472	8.49799749121721e-11	0.0261666306029359
EfewX9d1aH4kFxEdE4	MED6	0.0378190023010446	0.00811420194493382	4.66084065416406	8.49609840550845e-06	0.0128742115215837
HpXlFIC2JHrXLSnuOA	GPN2	0.0425262354777737	0.00912409452183009	4.66087186800032	8.49539043498234e-06	0.0150384030752627
iLt7S.cPpO7Ked7h4I	CNOT7	0.0291204996669368	0.00759469737017128	3.83431995345985	8.49527638489576e-05	0.0130929278173242
9hdHpe64eREnZAHt.o	MCPH1	0.141112178471795	0.0215274893337529	6.55497611839692	8.49478296845857e-08	0.0390783391340405
0XlXNHLk57pSEjhF.4	PLIN2	0.344264063448626	0.017779979508463	19.362455580152	8.49014422741994e-16	0.0357094468102748
Tkh.l..QK6JuDFIKNQ	ID2	1.61332238025925	0.0583729157789125	27.6382010172271	8.48798791222169e-19	0.0844505472828804
NtJKjCo7ye15Av_tLQ	ELAC1	0.142590859108135	0.0217517894322991	6.55536224051538	8.48752294557797e-08	0.0486001126302416
cS0d5EQiA0H26_jqlo	SYNM	0.891520950118357	0.0589698382839789	15.1182532640685	8.48597624040365e-14	0.113441335900567
TnJevX.OhODIdEegoI	ZNF700	0.171808453931789	0.0262084385690556	6.55546317569043	8.48562618830859e-08	0.0428234820508908
9qDd_iB4p4qyKizlQs	WIBG	0.0555707642977894	0.0119217122539725	4.6613072949544	8.48552076885699e-06	0.0226716097693151
x7kpTuXuB_C.mQDugI	C9orf85	0.136228252042057	0.0207807019746672	6.55551733565718	8.4846086052137e-08	0.0390113106737396
u6vAqGLeX16e4RqFX8	NAGPA	0.171105994323705	0.022372050304324	7.64820353951352	8.48198021933067e-09	0.0413739747801383
ioTlK86fyJF4I.74To	GTPBP8	0.267947430858776	0.022966280254939	11.6669929951391	8.48064935570053e-12	0.0468905766883002
EojoLJTkgJ4Tjukojc	LOC646836	0.799272595449646	0.0412769470872967	19.3636557897381	8.4801667721565e-16	0.0958599322725853
W1.N7nd5WUuXxD_QG4	MSRA	0.718741581308366	0.0184495197250928	38.957197369795	8.47351081571428e-22	0.0768852893517756
KqKjqfNQUty86K15yU	HNRNPH2	0.0791788241883962	0.0206439011996265	3.83545839629521	8.46723903254643e-05	0.0260183069130162
lVUBVf_uIE1X4S_SXc	NUMB	0.276880320762261	0.0183120137269133	15.120145981287	8.46663669154273e-14	0.0325357289651427
ZuOo8SO4lFuXJQo4j8	F11R	0.392210092338334	0.0841250816179752	4.6622254004985	8.46474940072283e-06	0.0847816903318567
TnqJL5KUS4Lu_fe0fw	TRAPPC2	0.21598533035321	0.0185103318123455	11.6683662153024	8.46341656817968e-12	0.032554759665519
3oLk6h.V3eR1J3x7FM	MSRB3	1.18062860596715	0.0887309300363247	13.3057165690005	8.46174675019928e-13	0.163672170814942
upWX307QohTkj44igk	SLU7	0.0890201357139951	0.0190933309877731	4.66236801587956	8.46152758806893e-06	0.0273177885018593
9OlMdIRF_7pedIno5Q	QSOX2	0.148860607525958	0.0267484086055762	5.56521360657417	8.46143768235165e-07	0.0349698665283902
uelcXRJ4B.AASjqUUk	NPIPA1	0.25035373714661	0.0282687718924783	8.85619432279701	8.46070075325083e-10	0.0452046199017132
Qe5RTVlJT2dceOIQjs	SDHA	0.0463303748961504	0.00832493714822018	5.56525221407294	8.46064186242727e-07	0.0151038436911632
KR6i5xSBxRKOAuuJUU	UBXN2B	0.0727855730688536	0.0189755638718203	3.83575284299951	8.46000304440981e-05	0.0305833705962795
0V.foqL6xLSX_oINR4	TBC1D8B	0.673896070449162	0.0393317344141346	17.133647434754	8.45839953818549e-15	0.0997887861675457
ltEJFJflEF4Lj0gThY	IDE	0.105603231818568	0.00698388378484415	15.1209892764452	8.4580348428681e-14	0.0260740408061488
fICCwXVCeFeFSVRHe4	LINC00176	2.66312264276156	0.0489138214134031	54.4451969976696	8.45623526834055e-25	0.192551415609412
KE6r16_9eTVjF0lelc	GPA33	0.73467912076247	0.042878550677696	17.1339541367621	8.45558076670622e-15	0.113506670523585
iSscIckqhFCHeRBSPk	SLC12A8	1.58679395354072	0.010993720939853	144.336386399302	8.45498355938588e-34	0.081443057297294
cSA9IColJRXqkuC5R4	RGL2	0.109277566140064	0.0196342202896012	5.56566874203505	8.45206088545187e-07	0.0404692790969901
lfXxJfqjoflRF1F1Xg	PTPN7	0.162976860207513	0.0184012630543993	8.85683008420173	8.45094121005068e-10	0.0339958230988358
9uz4k3sO5ST7lSnKqc	TNFSF9	0.115273775959685	0.0300479370533176	3.83632912153475	8.44585957862059e-05	0.0277974355227573
Wbvo6oe6sjKoEOItB0	ASNS	0.31822805060643	0.0682414475461628	4.66326641724826	8.44126112932542e-06	0.0442597320652704
Quw41DSrLu7lT9dCro	LINC00200	0.29675002732065	0.0196225517997052	15.1229070688507	8.43850679892923e-14	0.065410225791824
cyu5cWTvlnnv3nqG3g	NOL12	0.125271685483082	0.0268621832203804	4.66349605522898	8.43608896673524e-06	0.0259951332406563
rqVD33UYQ5WFk75EFQ	SETMAR	0.312727989245119	0.0353047827585272	8.85794968302377	8.43378285846637e-10	0.0462602551995914
fpspJKJShAkAfs27SE	KIF23	0.149217974614346	0.0388905538239258	3.83686936652841	8.43262268412375e-05	0.052051324731518
EiHe.NHJfe1dWSCHvo	UBE2E2	0.186392462436139	0.00757810852642646	24.5961722224152	8.43227903767857e-18	0.0274626295244422
ZUh0El8Ss3T4NLm0iI	PIBF1	0.107146697318008	0.0140039308724636	7.65118724833856	8.43134913948956e-09	0.0334191979449316
9aqj_SEpSiM66Nf9MU	RABGGTB	0.0796999709468857	0.00899726565195787	8.85824360755009	8.42928436279454e-10	0.0176642566186297
B3Oj_nfXOKTn9aIu4I	VWA5A	0.201590486662891	0.0525371359306679	3.83710461356184	8.42686545082297e-05	0.0708405033452404
BjpCEsgkinlRqHsFbQ	IDH1	0.1715428414471	0.0261548119796478	6.55874879087584	8.42412407381919e-08	0.0374766083590866
ZeuFlElWf7BSoMRLT8	LRP3	0.759986531083693	0.0571021504438737	13.3092453642476	8.42193819082155e-13	0.132045776961596
raKCeHxS9LilPdQId0	SPIC	0.214834726882259	0.0559831253358423	3.8374907723259	8.41742374590254e-05	0.0770809824090517
QcZ6LXge6sgBGF6f7I	TMEM51	1.46448726147705	0.0529650858826249	27.6500497841632	8.41621232463682e-19	0.120906471474082
WjhjsVJ9RlTpxSiCu0	CRYBB2	0.917316757107095	0.0331758965639524	27.6500969714203	8.41592775288635e-19	0.106128651278634
EeQkiP3f6.4r4Lt.pU	PRCP	0.144791066677998	0.026006580430555	5.56747808750293	8.41489118937145e-07	0.0303622789923901
KeSoC9fe2v.IRI3d5U	ITPRIPL2	0.361970986562048	0.094321550001421	3.83762763182533	8.41408011408004e-05	0.0657364830397878
QkHp0s9EqAnuKgmA7o	L3HYPDH	0.456136582314471	0.034270311710797	13.3099630421734	8.41386599210567e-13	0.0702631219460557
EShicef6Jir9ef_L4U	CDK19	0.185923891498381	0.0122916963225638	15.1259750175476	8.40736512134073e-14	0.030150956354372
KnhamGWaivegGWonmI	P4HA2	0.818528169057365	0.106960081936235	7.65265091649177	8.40662725661487e-09	0.144586189864179
NpI0sJCt.uqS_2F0UI	RAD54B	0.14142607175178	0.0253980430633932	5.56838459556836	8.39633264632693e-07	0.0340802601123038
cqtTrc.PdlSdFdxEhE	PPP2R5B	0.345138296712304	0.0526093992719041	6.56039227759486	8.39353478942673e-08	0.0655828086574203
Zgxl_ePJRFSkPwzU60	PAXBP1	0.118394991094387	0.0253768368822244	4.66547472578501	8.39165924996695e-06	0.0282640021860768
39XcUepHiGCdXhJYh4	HDAC7	0.45912876511393	0.0599888651342919	7.65356644247425	8.39120214430366e-09	0.095767202753685
BxQRbgzbu6XwUKBIJU	SDR42E1	0.419464670687978	0.035930924372146	11.6741964760904	8.39065787012085e-12	0.0772175346503451
l51UglZFVH4RIyv7nE	POLD2	0.127499783476561	0.0332131534237106	3.83883402608617	8.38466589953523e-05	0.0465753728582576
36UrIoHIAiP__Xv94U	C1GALT1	0.532067897779334	0.0399656228565646	13.3131391368254	8.3782392753052e-13	0.0661637239637716
661JV0Zdd0tx0PuHtU	CLTB	0.0698623677402763	0.0149723649857601	4.66608767597643	8.37794521391829e-06	0.0201844685074236
ocMV36ACJ_VddSRHIk	VAC14	0.110720170303122	0.0198804510470363	5.56929870661197	8.37766158231155e-07	0.035339371341246
9ndXu0z.HCP_5dO3Hk	FAM133B	0.0677963043930638	0.0145294372831778	4.66613421233858	8.37690496881266e-06	0.0245812025970839
TKeSE_i_Y6lIesSO.k	ATP2C1	0.295960598321244	0.010700480816581	27.6586261303919	8.36465587930328e-19	0.0389260130098703
3F4dNSe19AydbdXcVI	CHST7	0.32750524883979	0.0499096222614814	6.56196608990464	8.36435081012368e-08	0.044611824328433
0IBWIQnlSRIrgoIS5s	NFKB2	0.360104001145098	0.0270459684629212	13.3145167879192	8.36283500283798e-13	0.0501543415341385
HuyJCRv9RdHt1NdRd4	SLC5A6	0.431714333019929	0.0251811059683465	17.1443753726548	8.36038452142069e-15	0.0474939545409963
3oCG5S_6KAT0R43nLU	ZNF425	0.218673342219754	0.0569453267918993	3.84005772798307	8.35493832745172e-05	0.0685747508431129
0qVS76JdKCBSQCEtQY	RBM6	0.121267472208933	0.0158400279730792	7.65576124076495	8.35434349839344e-09	0.0266587404752198
onSrqIqVanle0ddwR8	SEPN1	0.357680160405956	0.0467201806191038	7.65579575391671	8.35376524767681e-09	0.0843663710227659
QN4TRVJlP7AiQf1JLE	SAR1B	0.125445630133225	0.00829038965314166	15.1314516424071	8.35207197118627e-14	0.0219056613254915
lKdX3iXdeeeF40Xen8	UCP2	0.351375753932335	0.0535396390503921	6.56290853215534	8.34692528196873e-08	0.0431523630972898
BS5eh1edbimD8RatSc	ZNF695	0.850922768538396	0.0307617818589472	27.6616865837016	8.3463380731817e-19	0.107209806273611
oo7gvetO0X5u3RXoos	FOXK1	0.114914701586404	0.0175088057402785	6.56325184544403	8.34058690807492e-08	0.0282571999235667
QVApRNQhKQw4ki.EnU	IQGAP1	0.0800769892606751	0.020849404106503	3.84073275435717	8.33858648451173e-05	0.0240546496245848
iCFcx3S3VQVFVCie6g	ZNF384	0.0644096141096297	0.0115609939182131	5.57128691229216	8.33720077867336e-07	0.0266045727968371
f_p.kpTml3tE3HQd54	ATG4A	0.0904819289345069	0.0162407382744846	5.57129407575397	8.33705536754529e-07	0.0278876760397682
KcgpJNE9U3x86HXFXo	NR2C1	0.179557962753457	0.0384656851359516	4.66800375760459	8.33522504171308e-06	0.0450927207438412
6R3lXR9fypAwRJIFG4	TMEM150A	0.279138276803108	0.0239009895759803	11.6789422427778	8.33191555945045e-12	0.0575289479692209
c64oVUSfcfV6EvZfdQ	RARRES2	0.449352702933144	0.0586816356276431	7.65746724894404	8.32581009427466e-09	0.0940418923764777
93vfVUXlGxIlQvdnKc	TFG	0.193348080977572	0.0347005473274878	5.57190291994076	8.32470607883737e-07	0.053089604353046
cld3ujVx56.eX3U54g	FCGR2A	0.691512809269508	0.0222678523448502	31.0543108765239	8.32278885953511e-20	0.0911265798909104
KOCKhJj1irh4pxJ9zQ	PDCL3	0.112208572909113	0.0292090254045686	3.84157195780871	8.31830375909957e-05	0.0289128256985501
fIcSejJ5X8JfojqijU	WDR75	0.0284422935835045	0.00740378222352434	3.84158970710046	8.31787532755602e-05	0.0119804754538395
u1R5dd1LrdUrlIVAJ8	HNRNPUL1	0.0417086009065936	0.00893308483626707	4.66900311270554	8.31303364661886e-06	0.0136899849067272
QvhSDL6wd5SJex8XlA	ANGEL2	0.0657122285704835	0.0171043345166038	3.84184655104203	8.31167819500675e-05	0.0201568690369461
0Qf53V5bl2uudeDung	CENPV	0.354083016214636	0.0921644137705252	3.84186262060155	8.31129062732453e-05	0.0463048328332674
cSYrV7i.gIJ7eYLpX4	SPTBN1	0.285555008660658	0.0434971295273197	6.56491616260118	8.30993071066413e-08	0.0436058613909248
EWWW0UnOT0db9S4kjs	PACSIN2	0.405600766584102	0.00929597262449224	43.6318804893487	8.30364123563173e-23	0.0375213340832124
WJBSL9T2gr1eQCpEiU	BCL7C	0.15388180549029	0.0276121174247986	5.57298098957408	8.30288609044335e-07	0.0411984801293683
TiiSuS49MVHcCee46U	APIP	0.126613650961203	0.0142797836297984	8.86663651520544	8.30188262757782e-10	0.0242533836217572
cXFu7uv_q.b_r_r34Y	TOX2	1.21177755301539	0.0277722194885692	43.6327227470656	8.30034364488641e-23	0.0600551447260656
x1wiieL77q9zvx9Vzo	IKZF2	0.524447906811069	0.0798782113097516	6.5655940238492	8.29747839698735e-08	0.0784490177542463
ijOuV7s1SI5yAHvf50	WDFY1	0.621748313905798	0.017855507710641	34.8210940837748	8.29737226557619e-21	0.0461899231319239
9gl7MATrEuLg5VTVQg	MEIS3P1	0.26651824265842	0.0478194541461589	5.57342712118407	8.29387386595273e-07	0.070695346544626
uxKXrHumdbgPIbzSC0	H3F3A	0.110692593568466	0.0237027436147811	4.67003294502322	8.29022966121718e-06	0.0185930482632142
KucVf485IQXTSeXB80	RASA1	0.485201810687688	0.00890308272222717	54.4981806668321	8.28647200837852e-25	0.0434359797453455
QjIAoqJx3SnkJpBLlQ	HLA-H	1.67988880658565	0.0221889744246525	75.7082672878854	8.28522087129668e-28	0.0774991278239431
HKtKnpfXe5NHecr6qU	HYOU1	0.542934568563695	0.0612225122924824	8.86821772308032	8.27810623732257e-10	0.0668876363048534
0R3_RHfu..nR7RPVJE	PHF11	0.193084241766912	0.00784260665336505	24.6199064037038	8.27465624629678e-18	0.0249921846372453
TWl6.Zetu384kU7CXU	E2F2	0.567999085367982	0.0259734081299643	21.8684849722401	8.27335274645749e-17	0.0496683135690421
NV9D10LerrhCsqnKx4	FAM20B	0.139823092102497	0.0119672726831804	11.6837892646178	8.27236317478672e-12	0.0271985597610801
ZWmhJ58TvTd_UDCrVc	PC	0.614645147047192	0.0358304304706751	17.1542774946631	8.27096771156492e-15	0.108321063335731
K7RF55XH3F13H0WZ54	TM7SF2	0.258232465193075	0.0150532850183997	17.1545589469299	8.26844083464692e-15	0.039957552949324
Ze51xTRTsIPVqJ1OX8	IL23R	1.50562668184618	0.0776499548965194	19.3899234565257	8.2648428465652e-16	0.159717639169963
QFOGA8mS6f6ocmNep0	DPM3	0.167394538892267	0.0358351644617874	4.67123679788793	8.26365459845619e-06	0.0393437328942381
Ed2iSvih7ueHugoLpc	TGM5	3.01625347739671	0.0866037795660499	34.8281967889902	8.2631946632064e-21	0.194477906076248
fuGuHul_CXooe_pOyE	FBXO31	0.0996351334529624	0.0112336041208496	8.86938264702058	8.26063492527031e-10	0.0252294858492114
3ntYFxQiRAkJOTVuHk	LTA4H	0.0472749261699723	0.00847963544053387	5.57511304601509	8.25990863062262e-07	0.0136497039797583
rJBOfrD_k3vCsoi64E	11-Sep	0.119353309967722	0.025548826183989	4.67157704656186	8.25615965163492e-06	0.0274426521831553
6SuD9VJeP9SOHEP6iE	YBEY	0.470791601389972	0.0274415754354022	17.1561433306998	8.25423129144041e-15	0.0595297422843544
65JQ5w59R959wx7S6A	PRPF40A	0.206367634331784	0.0441737613070033	4.67172430478695	8.25291805850369e-06	0.0467063724072468
0h575QxdIdSoCIopTQ	SLC37A4	0.136985887960913	0.0117227663751387	11.6854574745624	8.25196988794763e-12	0.0245823073885794
QfQKRJKSDipRKSi67o	SDHAF2	0.0711854192582185	0.0185169825083696	3.84433150628311	8.25196720753191e-05	0.0180950384660606
ulB7I9S43pV5cXX13c	ZNF280B	0.171202099620637	0.0366452560013367	4.67187620723383	8.24957561698843e-06	0.0587942415385663
oql0AiEUkHqX4gfU.8	GPATCH2L	0.381671508632495	0.0373951835223352	10.2064349652017	8.24765244121695e-11	0.0769862169136476
3Qo4ejyl5fPt6l75JQ	SLC30A6	0.148708113587026	0.0318297466170456	4.67198546617992	8.24717236666083e-06	0.0526283845616546
HV6oyeqT_3J6nF9wR8	TSPAN14	0.155322910101693	0.0332455035958116	4.67199751250755	8.24690744118108e-06	0.0518575545519262
l1V3Xr9RF0hGRL0ULk	MYH11	0.861979177273262	0.0971735082696882	8.87051617896709	8.24367136847216e-10	0.146619266846461
EEDSXrRSf9oEkiESKk	IFIT3	4.3856480976154	0.100479313890983	43.647273531084	8.24359031274875e-23	0.13552788732279
ZJ5no6EWX5Hvo96s4Q	ADAM23	6.37615477620458	0.075534810550342	84.4134608897316	8.24002489977523e-29	0.295170327574677
3Qp_0JLudNE6wNOSbo	CSNK2A1	0.215634561839005	0.0386711202547055	5.57611365842878	8.23981842787286e-07	0.0559796392557412
0cn1ftaKM8A5yrivyU	TFG	0.696768503956652	0.0200027576864864	34.8336221873736	8.23718727225404e-21	0.0461261966234287
36UASnSlAhdUJ7Ox9Q	DSCR3	0.0809929688849729	0.0105693767562608	7.66298437010456	8.23422883715844e-09	0.0218538202627907
HUUX_KF27VAIf5c1SQ	SLC43A3	0.152856503552004	0.0172300051282676	8.87152977692541	8.22853344341276e-10	0.0302785746360096
Qun3e4Pl7BEy6fdZX4	LEF1	3.32160676198975	0.0393461624996133	84.420094641311	8.22627806244285e-29	0.163289237104261
0H6ylikog2fAVuK6K8	HSCB	0.132283548419743	0.0283081236392378	4.67298893086595	8.22513421560149e-06	0.0280727253256579
Bgq6nw6if5eoXgXokc	VWA5A	0.26863854684011	0.0408912556944153	6.56958418806394	8.22457216023284e-08	0.0723158566586064
c_5.L5y.seIvhd1e5I	MTSS1	0.273466203599302	0.0233973702257993	11.6879034250508	8.22216388621134e-12	0.0547652261448046
BoQJSX7ovrLX7v.TJU	C11orf31	0.142606764907356	0.03708285982182	3.84562478710026	8.22106667982331e-05	0.057725899184002
r.fXqpd3Qo4r.gjzlI	RPS2	0.0505943565004569	0.00660171754082926	7.66381720931696	8.22049570655385e-09	0.0109226298801248
u4qfw1.AH6IJ6epmuk	PLEKHB2	0.227577708612751	0.0486980308072503	4.67324252829682	8.21957438005957e-06	0.0601160119859907
QUUF7M0JdflUQJ9QJU	ERI1	0.118671108459589	0.0116246068316695	10.2086126591643	8.21827526539674e-11	0.0270816406472936
NfUlLd7FkbWif23GHs	FOXC1	1.01353393651298	0.0590628333192445	17.1602661022824	8.2173756918054e-15	0.118412847893359
QJUo3p.lIr5BO_IgVo	ABCB9	2.38038851309964	0.0545277204438337	43.6546492999201	8.21497721501994e-23	0.125469953777614
NkgchVZRJJd4L6EkAU	APP	4.85374455288053	0.0515962483761133	94.0716564797295	8.21282282345066e-30	0.180836167292594
6usWUA9AVSHVgdOdIE	FBXL19-AS1	0.170138805399564	0.0364042821551702	4.67359319638172	8.21189280926522e-06	0.0538917653717198
3qn9u1V7mtLv9LFF3c	PDXP	0.14150502245495	0.0106169155397318	13.3282611060995	8.21076263281443e-13	0.0233658648336056
Wv10HCokEoTeeonkqk	OXSM	0.0549561655541891	0.0142888611448177	3.84608437279977	8.21011458196742e-05	0.0258958938398098
xSUpJ_beA0XUCiTd7M	CLUAP1	0.0590183779518112	0.0153438142983213	3.84639547926934	8.20270936564698e-05	0.0321282957793785
3RSnk4h4X1pPfHDLf0	DENND5B	1.39317752428552	0.0319099711421914	43.6596297150347	8.19571523970699e-23	0.105801732007428
HXqBPB5dEG.uXS8Vsg	SNORA59A	0.341247088334157	0.0291901035342369	11.6905062681231	8.19056948766199e-12	0.0721066299522221
fW1rQwDWXh15lVk5gA	NPW	0.327403170301202	0.0498217808412999	6.57148670265518	8.1900457490104e-08	0.0776199450641064
0aZXcBf5XN7_RC_S7k	AMZ2	0.0545745703321418	0.0141860024434425	3.84707182659263	8.18663420678983e-05	0.0159714897056253
9_qiesHjgN.1Rf930o	FGF2	0.434044584327269	0.0371262150141917	11.6910539940943	8.18393712596795e-12	0.0835802834494905
T5yyiW8qii.qt1EY5c	ANK1	0.552703703310441	0.118228608568671	4.6748727740411	8.18392615278754e-06	0.118923285674619
QKF6lPkFAOqH16sqK0	VAT1	0.275586648319098	0.0269887244950662	10.211177203631	8.18381951142e-11	0.0543705856270567
QEpXPUlV_fR3FoSGkk	SLC15A3	0.439860160443479	0.0201025325618895	21.8808331283277	8.18376460270775e-17	0.0399612574138298
NICr.zoUOVS_0tIlvo	SGK1	5.2133896580371	0.133595624604039	39.023655703463	8.18371357257826e-22	0.178740616501793
TbinVSUSVXfH5fAHog	RNF216	0.116613120866565	0.0177440437690482	6.57195858984404	8.18150544860245e-08	0.0287653408155617
QSk5xDUoe673O5bs60	NT5DC1	0.332612793780236	0.017144646343154	19.4003881516664	8.18065936871405e-16	0.0395476839068341
6Lyzpd78C6eqUAwqOI	UVRAG	0.178367276364783	0.0463608635698138	3.84736742654035	8.17961873877214e-05	0.0622313855232253
WbfQoVL541QQCtQAqU	NAMPT	0.563754695278022	0.0257639916519041	21.8814965823185	8.17897991840235e-17	0.0496805512032055
3RXJ4KE1L1UnsvOzeU	THAP1	0.069319930310172	0.00904207522671781	7.66637398739432	8.17848469456163e-09	0.0244582747662167
rQvx197.i.7JLsVGeo	ZMYM2	0.130206518432282	0.0146712497232516	8.87494391332767	8.17775696677386e-10	0.0291645762826262
3JGiA1ORqAJ94RLSdU	ZSCAN29	0.192486380196425	0.0164635137973869	11.6916948936488	8.17618365592569e-12	0.0462154075740841
TeYp8Xrqnf4oRQXu5w	HIST1H3F	0.329567724555138	0.0856570134301768	3.84752761458097	8.17581959719132e-05	0.0615153514923722
rCOmieZudsntCKtNhw	ETFB	0.227417998149136	0.0296623816218243	7.66688262084162	8.17015396337824e-09	0.0354634368329295
ortS6TUiAkXzi6CD_g	GGH	0.0880615438057865	0.0114856789236662	7.66707343910998	8.16703090082838e-09	0.0200363450034937
rlKvolhhSAPkkpH8KQ	DPH5	0.15045474762718	0.0269642546035665	5.57978515776511	8.16653700482852e-07	0.0302132155188165
rkRY6.Xs0SVAivd66U	GHDC	0.127122151573972	0.0165800517002175	7.66717461878026	8.16537543025361e-09	0.0326944262692698
QiF7uBz4gjaBJ18d4o	FUT8	0.468595751450882	0.100217419576929	4.67579142856674	8.16390889706225e-06	0.058740065602434
91r.DPno.nF.rx_5Ls	AKAP11	0.219422275481086	0.0393226123373096	5.58005336977311	8.16121027347888e-07	0.0357652050037411
63s44IPpUq4ap4Wong	TTLL1	0.138139611189637	0.0358975521578451	3.84816242016236	8.16078200330516e-05	0.054157043716869
B7WU60gRcXVevPuKek	MZF1	0.188503360684931	0.0337813279780549	5.58010510443482	8.16018323130539e-07	0.0362313830073019
Tukq7v7qou9HrHfi6U	GLE1	0.043320937460558	0.0112571368045541	3.84830869631365	8.15732099756644e-05	0.0145772259685611
xIk7hXgUneFSggh1FU	PYROXD2	3.02732718083983	0.0445603110631826	67.9377479332976	8.15664770245972e-27	0.225881763444219
fuspSX4JTZEtyAfuyc	RHOT1	0.0629690224410274	0.00957945480147485	6.5733409412123	8.15654077963255e-08	0.0191141838723712
EXRtTR6d3D1H7097hU	ATP6V1G2	0.261363271411151	0.0397609207833888	6.57337069317427	8.15600434563435e-08	0.0706847978727387
01ScdqKeKeijZ_LUos	RN7SL1	0.180614726024292	0.0323658425929528	5.58041167955311	8.15409982831991e-07	0.0215787818508096
TnoszXhUhcYT4I.klo	SMPDL3A	0.56057003551133	0.0479381545672805	11.6936089962449	8.15307288312021e-12	0.110188909440779
6ooIhor4r.197MJFx4	PRKCA	2.28485959457348	0.0467994981681745	48.8223097256902	8.15130834240182e-24	0.174256324859442
xR5R1LXlFFe313kLnQ	PCSK7	0.0595307927715856	0.0154679440442637	3.84865581367697	8.14911400977465e-05	0.0227615156431207
lJ5KaUZFKl5H8yFJFo	PYCARD	0.3988012213909	0.0341031905369258	11.693956345788	8.14888632310916e-12	0.0720862461585201
fSIK50pQSER1.LYv4o	MCCC1	0.169357354854167	0.00872756962642714	19.4048700959489	8.1448788278874e-16	0.0268763858259784
EpglSiFFii.DYiO96I	CCNDBP1	0.0914193131345862	0.0237517890205368	3.84894430712319	8.14229958168219e-05	0.0408401428809249
NkX0P5TbhkhezA8rwI	CXorf40B	0.231174104587047	0.0260405120376103	8.87747922364824	8.1402624339422e-10	0.0418644285599599
cigtUAK57R.C96H6r0	CREB5	5.98278607539282	0.0270332808382933	221.311875209688	8.13994806393958e-38	0.249550844241513
6oiX7gf8n_uRJ4xSio	ZNF75D	0.0976297081207938	0.0208742941598368	4.67703038834425	8.13699276092784e-06	0.0314024437665123
lL5QkKKIjsbqe7pLVQ	SUSD6	0.193252106519301	0.0293931328812151	6.57473659920093	8.13141633028212e-08	0.0372529307711712
E7gcfnS014rAK1KL6k	ACOT1	0.254041876195202	0.0248682551023008	10.2155086937201	8.12596621130535e-11	0.051916886216093
BtVCAu0iX8boX1ToAo	ANKRD20A11P	1.50427850237386	0.169428851002719	8.8785262573121	8.1248303184224e-10	0.151899469369929
lVJ4FYpwII4pCIA7FU	IFI27L2	0.120557876427076	0.018335212432437	6.57521023393195	8.12290836284399e-08	0.0262743063674444
umiL0YHuVBk7zJSrXE	TNS3	0.920866591619951	0.0235890264804555	39.0379226706506	8.12286336852425e-22	0.0936913979040391
Bk6eL10K0KmIIul87U	PRPF31	0.0624910911487433	0.0133592449421918	4.67774125103289	8.12159104206834e-06	0.0193371088903706
cRE5.3kbr5fLTfXEkU	GNPDA2	0.131242271996116	0.0171114202375877	7.66986434637515	8.12149503590148e-09	0.0289092900151386
QXdl6KN7lN_j4g_SO4	TRIM32	0.160437270350851	0.0342979070767067	4.67775686697255	8.12125304345432e-06	0.0419732397834221
uEJ6JKUGOGZkX3E02I	TRAPPC5	0.147235788754404	0.0191960880765111	7.67009341526029	8.11776937537183e-09	0.0257588189613069
QeWTjJAnYYf.sELrpc	SPAG6	0.749230875538133	0.0342269578012863	21.8900809089722	8.11733462929919e-17	0.106136186089432
fVjoSNL.hd_03uneLo	ETFDH	0.126157085153868	0.0083243615615834	15.1551664617834	8.11699134260529e-14	0.0269340064164521
Wk4n1OuC33sUORSIOU	KPNA5	0.234385971116572	0.0263975332049431	8.87908613645314	8.11659085374547e-10	0.0561015674504537
0fFkRXA1KV03sV0eo0	KIF7	0.222082757720369	0.0397810187118511	5.58263123750043	8.11019745244996e-07	0.0711821980861334
KXVXvXlUJbQ0j7oksQ	TRIO	0.135281468660056	0.0152350190338249	8.87963896597064	8.10846369210629e-10	0.0411334001001353
QgqgOig5XXt7tvd7lE	ACAD8	0.202075342943283	0.0172750943967338	11.697495730124	8.10635436626238e-12	0.0373519220956349
0eS_5JIoh5Ifa_KAas	RTN4	0.292857377776446	0.0286634450428162	10.2171032595345	8.10477617162736e-11	0.0708363973700406
0PSNafoSkXiOuUC5J4	COMMD5	0.0719631679164199	0.00938130657987605	7.67091100836518	8.10448627209773e-09	0.0211770507888231
KvsgRKJORPSAFQlUTo	YAE1D1	0.101153809238403	0.0181183621993439	5.58294442541095	8.10402249809753e-07	0.0316005650923658
NRcFEbkMC125eedElU	TNFRSF13B	0.433817817542015	0.0176016047034389	24.6464924562962	8.10174468308326e-18	0.0351250498739337
lpeo0F6ntREgBABUFA	DUSP10	0.417284656328997	0.035670787841479	11.6982181101077	8.09770222279106e-12	0.0513135386524064
KpCYUm43RIkQFdLdQU	CEACAM1	0.384304432974109	0.0688276828895963	5.58357359771295	8.09163223742085e-07	0.0878162919353298
o0I20aK5JKOpKH0frU	FABP6	0.629542905793534	0.0616095583073534	10.2182668256265	8.08935006742284e-11	0.115822391319534
34R05QQgXuVdfXBeKU	CD72	0.726122582626522	0.0620672139342673	11.6989717533564	8.08868591107873e-12	0.0861421998289444
B00U16MLF4LSmGqKkY	CYFIP1	0.243200740994058	0.023800457948662	10.218321912908	8.08862050234824e-11	0.052868316255199
Zp.y8ekeEqGJdNIgx0	UFD1L	0.123742456543984	0.0221611791392999	5.5837487602157	8.08818628023096e-07	0.0469502468556177
K6IlaZV5RdXhW3DMwM	MAPK3	0.240551808998569	0.0205615498447861	11.699108813024	8.0870473066819e-12	0.0351293003228661
9T9eIUSIiqIJeo_Egk	LCK	0.532508188500404	0.0599592481826231	8.88116853764573	8.08602165004996e-10	0.0691290722973324
ZujesuJTfoV4IopBEU	FBXO22	0.179087330386415	0.0233427594738861	7.67207195819168	8.08566373452e-09	0.0460490252583851
Qllyy9XtECo5Qp8WN4	FYN	1.16282467814231	0.151565742939664	7.67208114174728	8.08551502299801e-09	0.154026872948588
3wsLStXCVbVCC4RC6U	SFT2D3	0.101734870035559	0.0182193446274325	5.58389295092308	8.08535077473631e-07	0.0411888314364091
BCrSnX.y9Ij0pJR1S4	AP5M1	0.0872849905174792	0.0132704149887519	6.57741228073593	8.08347435296349e-08	0.0222628103339626
3BlNNCBlxCCpi4qRJo	POMC	3.02974023969481	0.0555268214839304	54.5635453052471	8.08193538898889e-25	0.17770117495988
WsHk4IK3qh0RKJ6keI	MAB21L3	0.348734074746285	0.0298072922394511	11.699622761598	8.0809059283693e-12	0.0781651071776615
6n6Sz9J6eig_iApVBQ	PGM3	0.296065728473006	0.0530184711005946	5.58419966338271	8.07932272481628e-07	0.0562172921108721
i4JVdIJXl7RtpP7iFw	ICOSLG	0.178531878529901	0.0381496719495287	4.67977493400455	8.0776957543067e-06	0.051542080612125
Nuil6.erDl1fqTfTk0	ADCY6	0.740932118184963	0.06332789987296	11.6999319363396	8.07721382188285e-12	0.117623376441484
Hgiv395FKKKbnQs2sY	PMM1	0.127013403444397	0.0193089858093888	6.57794276189471	8.07400441148706e-08	0.026967789033032
Q35dRFdd1KFejg1ve4	RRP7A	0.625839712720268	0.0815653270624624	7.67286462593355	8.07283837441879e-09	0.05283547972928
faTTVN3D9V3tdTUmn0	RAP1GDS1	0.295973083485138	0.0252961059428805	11.7003417108331	8.07232308720476e-12	0.0422160986968569
6xSHWEQ6lFFLuEkoTU	LRMP	0.636049310903421	0.0290477539500226	21.8966778635539	8.07029104160342e-17	0.0449007764802567
964df114E6Fj6kySOk	RTN4IP1	0.274368601424994	0.0586222861946026	4.68027808595181	8.06687371945857e-06	0.0474626547296103
iYen13dK56Puq8uk.U	CDC42BPA	2.78406676576059	0.0329481639721198	84.4983886846145	8.06583210714115e-29	0.172563238088702
0UuayX_1fTl.Q94uoo	JADE3	2.54674967074725	0.0730339924792614	34.8707442150368	8.06151788045596e-21	0.136108924638978
cXp3tFlOQdTlz8egF4	COX4I1	0.0395853910160213	0.00845690802573701	4.6808349925943	8.05491305600498e-06	0.0108533354592548
ThH5Ek6d5dEOOS0lF4	CTSZ	0.827836854744054	0.0707436967191063	11.7019168227955	8.05355261087939e-12	0.0579378353538315
cU08kvtW_1g2R7P1Fc	P2RY10	0.132519763911957	0.0149175579626586	8.88347571658031	8.05229304390733e-10	0.0254113522362344
0khvJKd9AMHU65EokU	TPBG	0.472129479368916	0.0353832521644108	13.3433036956335	8.04763225764774e-13	0.0903252496839215
uor8nTo_mnU9yXf6sU	ACTL6A	0.105714902061086	0.0160673113131223	6.57950169763303	8.04624176237321e-08	0.0217161368298089
uhSgrzlH_609TkLTps	BCO1	3.66887510210934	0.0839580620548343	43.6989017173019	8.04547318869321e-23	0.208613555198795
cEDlG0E0obwX8hXM60	ANKLE1	1.0210716849412	0.067341098128418	15.1626824230583	8.04393820176765e-14	0.090263961751379
rKqHARdSCXcS6XkgVc	MEF2BNB-MEF2B	0.304218170676647	0.0396393029677782	7.67465994353984	8.04386854530956e-09	0.0699663820355461
TASKea9AhURGRCFa54	PTP4A3	0.565967004122473	0.0424146484915732	13.3436683846364	8.04371966542521e-13	0.0726201387003216
THlCSWhEaqRINHgqgA	FBXW7	0.460181852123073	0.0517980134359684	8.88416025243787	8.04231410047781e-10	0.0807335550685602
Zn9731.kLACrq29Rx4	SCARNA23	0.807066371659618	0.068961411622743	11.7031590953317	8.03878071394098e-12	0.126783445774781
Bir.CuqIjCp3dqU5xU	LPAR2	0.166137533774589	0.0297399526250407	5.58634157455594	8.03735631720302e-07	0.0449632617706814
cnBChQLongJFMXjnjQ	CEP290	0.0607877405909936	0.015775000679429	3.85342237545906	8.03727682941811e-05	0.0291194432721076
EuCFC1IHg1wgOSh5Ag	OAS3	0.487118883058524	0.0740299268208436	6.58002653761063	8.03691743634665e-08	0.0972338215660285
oXsWAugphUr4oLiNSU	WBSCR27	0.367718592268265	0.0558838247430612	6.58005413836537	8.03642739214286e-08	0.088777905823173
lj3sBXotOu_eo5rl80	SLC25A24	0.671095474179769	0.087435792463468	7.6752946965073	8.03365193214454e-09	0.130071202214869
Eg5j0Rf7ktaN0fppCo	CAT	0.275268400819106	0.0206276283183847	13.3446461498324	8.03323944497098e-13	0.0377190267633046
3ec8iVNeiVRd4FF1xQ	SPAG7	0.0825159680572316	0.0214120491695271	3.85371654080945	8.03042709541227e-05	0.0242773320758514
ceKIAvDQUrx1RL_Vu4	SNAPC3	0.0769888429686984	0.0199772897473864	3.85381820768609	8.0280611540897e-05	0.0250175216035797
o3eVzqne15FXSo6YSQ	DGAT1	0.0762723472001487	0.016290210094458	4.68209720794805	8.02787262399674e-06	0.0307027868099581
f526.S7W7tTu3lfSic	RHBDD2	0.198465599990525	0.0301588768555955	6.580669463946	8.02551052920362e-08	0.0379913348078124
fOigZNF5VN5NhJRNZc	MIB2	0.277430086274412	0.0421577457748802	6.58076187839528	8.02387228406787e-08	0.0545823162087537
We18LlNB3SdX7J.7qM	NSL1	0.138395832411949	0.010370156533125	13.3455875974365	8.02316197661895e-13	0.0236123515246116
o_6dVarNGX.HlGiDlc	BMP2	1.04880878473647	0.0478828677680846	21.9036334627295	8.02099842756034e-17	0.138770741886144
NT6kf1TdQdoLCVCIEE	GPR183	2.4167350431012	0.0396590744332897	60.9377570615364	8.01977028364006e-26	0.096667291444246
NIB6CiWvYnSVeJsHu4	SCAND1	0.089632933979885	0.0191413016421501	4.68269795103739	8.01503603457516e-06	0.0288767815398688
B.MnES5zlIlJgt51ZU	HIST1H2BJ	1.71221550957629	0.0781662214414678	21.9048007950394	8.01275671816869e-17	0.0994947784266015
rUAeoKULEt3uubPhhU	RAB30	1.41142228950356	0.0288851866172153	48.8631874949483	8.01115907340877e-24	0.0949062184995449
BH0VaJaHfGG43o1Lq4	NTMT1	0.0773242867292586	0.016512103357497	4.68288533902322	8.01103631866672e-06	0.0271855823888665
0ECqTqXUl.lRC5dLlQ	SH3BP1	0.199562769673608	0.0170485064271775	11.7055866756445	8.00999592037637e-12	0.0402811479823657
EKefAJOBWo5Ikn.uRo	SNAP29	0.228317787547311	0.0223305793653381	10.2244453138421	8.00795015045632e-11	0.0441708360499482
HxN6t3O695J31.v0Io	TMPRSS3	7.13301908131845	0.0940635836053782	75.8318874097266	8.00402112916984e-28	0.332896553328632
xqfqgaC.N_jFfginq0	UBE2Z	0.122571224071028	0.0119876464071756	10.2247947518421	8.00337203117251e-11	0.0261776324312938
WoC3STOgEKX6KIU6E0	CPT1A	0.438575162431754	0.113768538095806	3.85497756912744	8.00113200348251e-05	0.111686863234952
ETe7o7Q4QQXp8XopT0	AP2S1	0.0465316474363481	0.0120703712924232	3.85503033080324	7.99990870304158e-05	0.0157951073195609
upUK7Xkp7Dkvw0i5T8	TMSB4X	0.0410586740739281	0.0106506709213486	3.85503170430595	7.99987686041893e-05	0.0102662948295036
9e1epSSoXeCX3_6X.8	FKBP1A	0.107422036846605	0.0278651749968781	3.85506413861174	7.99912495725284e-05	0.0231763116274559
H11VOByAFHx1SD0rbk	TIMM23	0.0417494106502023	0.00891424012008681	4.68345143139309	7.99896590489481e-06	0.0120106513110234
3lHUoQr0A68QSXcXtk	CD44	1.36651894629774	0.0439164433278401	31.1163391829469	7.99655305532517e-20	0.0806674018303682
xd1nAuhPVTAD7Unl6c	NLGN4X	0.186517459689735	0.0483760706861303	3.85557274587021	7.98734380603654e-05	0.0696791320299893
TgmBAhUkIgpIpwhU1Y	MAT2B	0.313377321769323	0.0306439824271851	10.2263902061018	7.98250408159244e-11	0.0574243382822684
lfQSwCH6T6epOunRl4	ZNF69	0.609207476398783	0.0925404164775945	6.5831503637795	7.98165192733914e-08	0.0541349686776764
ckt8SXD33_h61_kkvU	IL6ST	1.04262291580594	0.0475876752229186	21.9095156660187	7.9795583100869e-17	0.0798923213764808
le5TV4X6FZeKrhLosg	UQCR10	0.206722441819022	0.0369848320798883	5.58938435552433	7.97812888434631e-07	0.0362679840506164
EoKpXUR9eorSIQHv0g	UNC13B	0.496146492235919	0.0371650019717348	13.3498309138596	7.97790420862054e-13	0.0950824189263384
N7RuSgS4pKhKr3nX3Q	SLC39A14	0.196006573742056	0.0167407175521562	11.7083734990087	7.9770841290445e-12	0.0387284663980384
rrhKyeoXKc3xTgr7.k	TSC22D1	0.6047181997944	0.0516483355662581	11.7083773013097	7.97703932129728e-12	0.0855887902733592
csh_hjmJfWtLhu4pII	PLEKHA1	0.249343635309311	0.0532273055141056	4.68450606133413	7.97652906860878e-06	0.0773784566404062
0jkhEFPkpUXG6zO0VI	ZNF823	0.33600282664841	0.0221495811517713	15.1697146932975	7.9762084062963e-14	0.0484435595080511
9nqi7tXi07qeDXh.R0	CRADD	0.112716023837173	0.0146786175929957	7.67892637866379	7.9754581943038e-09	0.0314613709758098
Tp3KKy0eJ6F8BE3kok	ZNF451	0.118332459771485	0.0133125048068397	8.88882005966959	7.9747270248435e-10	0.0270050896924075
B1onqf6l3XlRdx93uA	HAPLN3	1.01787785354916	0.0995279415825214	10.2270562152158	7.97380974626604e-11	0.136257457876318
Bfl.4nfnEtl.nHn8Ig	ADCY3	0.16124749505205	0.0137715291776052	11.708757464223	7.97256066516426e-12	0.0244359019111288
9JYohVmS55QZVrogng	CDC42	0.173099447129812	0.0309675059240507	5.58971224722928	7.97177367373918e-07	0.0330143129190832
rpIgopQglBTQglXQ5c	TCF7	0.370214426661392	0.0361989308526243	10.2272199189704	7.97167420979687e-11	0.0862901414787741
0tXC5Sd1XAL1J03Zek	FBXO16	0.266181222269052	0.0299438913997478	8.88933301004738	7.96732336575657e-10	0.064976228699101
Kn2jl9iLrmGX37jnd4	BANF1	0.119427457055618	0.0309678207295252	3.85650182163944	7.96586942561991e-05	0.0247928185207607
Zufk46g7h.yR5Ou.qo	IPCEF1	3.4956328415297	0.0513952337304381	68.014727977771	7.9643182920811e-27	0.144586322369889
TiKVCul2UleSz47ks8	CLCN6	0.258372431313359	0.0551464930275661	4.68520149022361	7.96176985843539e-06	0.052818046058676
rt._UgvAp7dQtXgdJI	ERP27	0.141096962192985	0.0214292931931028	6.58430312757108	7.96135786053686e-08	0.0476989011988854
Bd.ovLdEO1PVcnXuc4	ZBED8	0.216324341744095	0.0461714154359774	4.68524388306995	7.96087106517668e-06	0.052199681879602
3tLitW4t.uLX7tNvak	PHF21A	0.0791122026016631	0.0205124842229945	3.85678310543091	7.95937970014545e-05	0.0202110541053015
u_Sp0JRQ3OCF0pSquI	PRMT5	0.0507535480346875	0.0108324466099531	4.68532639598279	7.95912196719103e-06	0.018277945989698
0S44hriOv4tdrl6sko	DCAF4	0.208397343753786	0.0234416001525562	8.89006477363112	7.95677388627679e-10	0.0409557987124874
lkllgASgL6gmqsocR4	MFI2	0.257482810265905	0.0335259456929665	7.68010580891453	7.95665384598661e-09	0.0586620601371561
3lC5T_q0k12.QRLud0	FAM171A1	1.69246642753478	0.0485030656260187	34.8940093928184	7.95342229910623e-21	0.147904838586157
61d5xJXqKJSjX763Jw	RTFDC1	0.0289096896336852	0.00749484542276678	3.85727630163892	7.94801397026944e-05	0.0111704657332395
Tovv9pKpft3R5P60qo	RHOC	0.180720246465417	0.0119109114540132	15.1726630798289	7.94798920053543e-14	0.0264019140224698
BlfewJg4o6Gbq4XCn0	MEF2A	0.145993796843988	0.0261121339043226	5.59103278877641	7.94623217565965e-07	0.0429576283592945
0o30vPYqg4pK0JY5yU	LMTK2	0.561616382052543	0.0326687425053114	17.1912457898015	7.94587470409049e-15	0.0895091536968867
Nk693oBmUoAn1uUuPY	FAM90A1	0.637709782170513	0.0717262419546047	8.89088518779665	7.94496370917845e-10	0.118856724201241
iuJ_.u1e6uhuvrj6Sg	UBB	0.0705944326762532	0.0150645900657493	4.68611707110145	7.94238155979163e-06	0.0144531919793754
WYS6fDA.CF.lgXpXP0	USP33	0.14436334434753	0.0308065371573597	4.68612696097981	7.94217240005669e-06	0.044016762239312
9gOHeqQIVcOBy6SJSg	TCF19	0.227254385118992	0.0255595860189771	8.89116063735398	7.9410026110878e-10	0.0503628350722125
lNFaERNOfCPQeokxSo	NOP58	0.049183741944685	0.0127498374677711	3.85759756302865	7.94061951700455e-05	0.0145453083169813
ukkACtB_ULR55Tu7Hs	SASH1	3.11640902194974	0.0368540789523051	84.56076262231	7.94035346142294e-29	0.169843874893415
QXnojsD_U4fXooSSTo	ZWINT	0.174179060450626	0.0311509434453499	5.59145377911907	7.93810743012446e-07	0.0332035236884047
BF16jZN6IuXLPeUn2g	RPL32	0.261265997587108	0.0340131979702307	7.68131234868815	7.93746512594023e-09	0.0596480216531545
u5NO51xXncWf96tEik	FCGBP	0.429274649058658	0.048279664503177	8.89141740059958	7.9373120875335e-10	0.0808160366103834
BSwYp.47vieiuLoWqk	TRAFD1	0.332509432306362	0.0219125152681759	15.1744073301011	7.93134399568725e-14	0.0435272686222518
fgPeXihJJUufpiL14Q	UPB1	1.81559977419433	0.0934320010239581	19.4323117807224	7.92934152326413e-16	0.134373882000516
3XUk9LUqolGgFO9_fA	UBE2L6	0.242086646717474	0.00981154501128344	24.673651951764	7.92899906282231e-18	0.024196259458279
HkwCWqdeP1K.cAKB4o	NMNAT3	0.474198088561311	0.0617295818692058	7.68186134106746	7.92874997737132e-09	0.100274353160715
Zz5Cu463p_rg.SqA4o	HOXC4	1.08519885056039	0.0248155032779089	43.7306807122646	7.92600552032229e-23	0.0892576808079919
xJv67xfdeorXnkHQvU	ELMO1	0.0861368458794652	0.0223251029422373	3.85829557437342	7.92457795060838e-05	0.0233205034037541
HWXXhblfYgk9R.snpQ	PGLS	0.146145861450155	0.0124773447009845	11.7128976519038	7.92395529610026e-12	0.0283825872250162
WogDUFJ30ogkZTgEpY	PFDN5	0.048580935179207	0.00737587706714846	6.58646215723719	7.92349333300264e-08	0.0123059726301382
xeEedZNee7te9TvWvU	NUCB1	0.125781157992529	0.00941825259168885	13.3550419006096	7.92269022790058e-13	0.0188870507627604
0npZXr0z_L8PseFehU	CYTH3	1.11993554462846	0.0453866685586677	24.6754295962658	7.91782760179918e-18	0.119639788374645
6V1UodUc_Xe4_lSigA	LMF2	0.0936202486184625	0.0142133111261588	6.5868007663717	7.91757193772118e-08	0.0305161604019604
EQ.d6I4XIOSKDJdd1Q	CT45A5	4.40104116166904	0.126096607310191	34.9021377779239	7.91601396125729e-21	0.260413880047634
HVQLQkIhy_CoveqUp0	CD53	0.100751586293696	0.0180149560946242	5.59266343833949	7.91481014435071e-07	0.0205270027300379
cVFFf.ClLwcxxLQxbo	RSRC2	0.285695510899594	0.037186369763494	7.68280186306497	7.91384256282646e-09	0.0582982262775947
iW7u1L8Sbd5Vcm7.uE	ADARB1	1.62950528105972	0.0743418226305775	21.9190924220022	7.91256814032601e-17	0.18552020979474
cQd0kXtO1dLIHvgFCU	TSPAN12	1.29179170220674	0.0211848568840904	60.9771266935897	7.91189847482854e-26	0.115940990085074
ZS0hXXhRP6N3oEnTZY	ERCC1	0.0382402608572805	0.00990943490704388	3.85897492803534	7.90899735996836e-05	0.0163249481192422
TFxV5AN1z1SxJSxe0E	TGM5	2.44780510693212	0.125947394555949	19.4351388971745	7.90747754085956e-16	0.214640159798709
xdNBGA0qSEgvJ2vQZU	GIT2	0.22418972124169	0.0191380868648073	11.7143224829828	7.90729960350759e-12	0.051013154114912
uAA3BHpxVnahV9RnuA	FAM104B	0.114021077135553	0.0243224958798559	4.68788555659647	7.90507088209048e-06	0.0458196863992276
lnxCeHgiilejtJhR.U	DNASE1L3	1.44909641469087	0.0296354998530849	48.8973164574455	7.89607811328296e-24	0.102607939314607
6B6hRUz9LKF6sqPoLE	ST13P7	0.099399236717981	0.0150873980632983	6.58822921626097	7.89264277716865e-08	0.0290355991604159
WnsDJ3kpQrJTLCC16I	HIST1H3E	0.154802702207324	0.0330174288880749	4.68851474571464	7.89184048387898e-06	0.0502299807473384
Tid4J.g09LrojpfesE	SARAF	0.0754748830014682	0.0160973925710905	4.68864026693456	7.8892038141836e-06	0.0167756700750146
uO7tSXg9R5ohX55GF4	TNFRSF18	0.82986119611858	0.0708319130981575	11.7159223832988	7.88864099915907e-12	0.128748086678193
uqh7e05einfaRH1U38	LRPPRC	0.0874183699817154	0.0132683630806228	6.58848189867381	7.88824151201229e-08	0.0233477777482472
cFS454rTueg57P6FEQ	LPIN1	0.367311630159715	0.0188966865835756	19.4378855009942	7.88629655249075e-16	0.037695258685973
0tQnuXYRNdNVJOoRdA	ICOS	0.706290025155302	0.0465296006460336	15.1793700214255	7.88418448372949e-14	0.11359614977644
QElrAaDRs69.e6t7pE	DEF8	0.594952752085117	0.0271377492728265	21.9234375741268	7.88236756337745e-17	0.0615773810380559
9l1IJQBTl6N1TJ91.k	ITPRIP	0.212905813816199	0.0277046009536657	7.68485401295875	7.88141708701406e-09	0.0382141619555636
HuHnp3tF00B6O4VOWU	ARHGAP17	0.246596005009424	0.0184585779122	13.3594259634941	7.87654732866732e-13	0.0286617825757087
rCCa.X6ifeXW6l3SVk	CLIP2	0.160070300387547	0.0208280560629703	7.68532117945142	7.87405489832915e-09	0.0348628485355901
lxkIKI9EiIYlSinh4k	AUP1	0.0620324328324146	0.0132282391162717	4.68939458133247	7.87337811617072e-06	0.0209983447641836
WqCXobedHojhG5uq74	SNHG7	0.696683537041162	0.0358384281806364	19.4395673138807	7.87335619190437e-16	0.0573784882116726
lP5emhz_b7ul8v78_E	RSBN1	0.113453000983686	0.0172175792566232	6.58937004399401	7.87279193201199e-08	0.0274617840909019
uuJ4hIwiDF_t0XNeV0	CASP7	0.261129647812079	0.0556841679537456	4.68947741176609	7.87164232369298e-06	0.0492322526863807
Nd91eTR709EOAryggk	SDHAF3	0.0999580957739486	0.0112360269505172	8.89621360060439	7.8687031485115e-10	0.0215978542700952
um0iUnihKfl6H3sIyg	ACKR3	1.69368446698505	0.0772469391784183	21.92558676109	7.86747439548594e-17	0.134446210735682
HeDqroXpPzelABKJSI	PRPS2	0.095772567610707	0.0124604096894498	7.68614917146722	7.86102399390738e-09	0.0228748041008967
ZwCyxCXyUpGunRl7DU	C7orf55	0.67063712303617	0.10176412241849	6.59011355965191	7.85988248516778e-08	0.0635221659844054
KH31Nd6A0nusCyXgJQ	ARL17B	0.112158754823902	0.0239142468016513	4.69003919521971	7.85988008700836e-06	0.0406460732403602
Elt5ZXKfXh1PL1hH7g	PACSIN1	0.540851655024725	0.0461539908033703	11.7184157991649	7.85965353323685e-12	0.102733846911737
0V.iL1ELrLIuvwbf10	TOR1AIP1	0.0613719439608127	0.0130854071319823	4.69010580578822	7.85848665149848e-06	0.0195966284705786
WNOUeR1JepBInId7dw	ANXA2P2	0.0675124385693442	0.0143941191381806	4.69027926761191	7.85485918387325e-06	0.0131724998391723
iKl6Ke4iOKThxwq.qs	OXTR	1.06582220490695	0.034221744016386	31.144590538595	7.85242357195525e-20	0.0681793466772851
3eUffU5UigSUC8dC3o	TRDMT1	0.286092305733128	0.0609916718042162	4.69067820687858	7.84652308471407e-06	0.0816588924331168
HVRNhyS8dP591c7VeE	MSL3	1.47235828035528	0.0241363307507045	61.0017444475193	7.84521818072182e-26	0.0878819248448859
KXum0tkud6UEcySp88	MMACHC	0.198238357401765	0.0422613834334628	4.69076829237916	7.84464196062451e-06	0.0455221931885303
iWeAeV6Ipzeed9T8VE	CDC14B	0.3943603145572	0.0704674931099753	5.5963437487657	7.84436627606595e-07	0.0887568834793061
QYlur3niyuidPn91Cc	ITM2C	0.479587171855069	0.0194260876294903	24.6877899967371	7.84060317888762e-18	0.0421259346712357
rXe5eL3V77dAmsVNdU	KCNMB1	3.92311560523492	0.0802024728225851	48.9151452214347	7.83664900129328e-24	0.225435382664054
EANqUrmOnRk7DVJH_o	LOC728903	0.666969456619532	0.142175776072401	4.69116100537328	7.83644697740028e-06	0.065049123171385
6n4zDDx8O6WpGunRF4	CHRNA5	0.718141799194644	0.10894996883257	6.59148237387983	7.83617382459525e-08	0.0653765358790256
cV5eIryfXEzCdf_z6E	METTL21A	1.30515919116021	0.0298283021308317	43.7557319030621	7.83313764530619e-23	0.111805938682756
Q3wUnion7EEXzs56_o	CLHC1	0.241245015826816	0.0313796160511502	7.68795307863474	7.83271201077121e-09	0.0534898509966975
uhfkPyDQkriEqILOXk	EVI2A	0.426830463799146	0.0416904425597532	10.2380890581189	7.83121265023741e-11	0.0487216355914943
uSreR7gdV6IwsLUfyA	ST8SIA4	0.175116204255986	0.0373267474277954	4.69144022244986	7.83062579127172e-06	0.0439345805919467
QrrOngQomkhB0qIB0o	MTFP1	0.156995521801573	0.0238167665326389	6.59180672516663	7.83056680244058e-08	0.0253527020502248
QL7MM5_wKeKuJ7N6OU	MCM10	0.113693459909602	0.0203127723724316	5.5971414352039	7.82918419955716e-07	0.0270085466119585
H_3yAzu7Mp6ua6dOXs	ZNF549	0.636695857589336	0.113750146354058	5.59731901889214	7.8258084776965e-07	0.049244586725372
i3nnejp4KdepTfTuec	SRPRB	0.189784810587613	0.0404512942983004	4.69168697515787	7.825485168093e-06	0.0325617819119278
xdBE_.1T.F1HFx2UhA	PGAP1	0.161275673022026	0.0417526172108163	3.86264823131246	7.82529938641334e-05	0.0584326380438709
HuVTneE03R13UuHO3k	CCDC171	0.267074436686582	0.0260847272199791	10.238728372901	7.82303170649716e-11	0.0622396784937014
fvorTwbx_xDntHu4TU	SLC39A10	0.341044700056343	0.0333089868989827	10.2388193639945	7.82186807145067e-11	0.0683978713861888
WUR0n9VyToQj.SU._U	CEP41	0.0737863522609524	0.0191013764764801	3.86288141861435	7.82001712895705e-05	0.0318452874227345
BFFed36XURKDc6l9Eo	PLEKHG2	0.136396486193766	0.0243647759567613	5.5981013917723	7.81095423339914e-07	0.0440741134625027
ZRVxVUBxXfXqAsPniU	PXK	0.294478595860716	0.0193892675266971	15.1877112147351	7.80557867529478e-14	0.0638097351490433
oj.o91F1VS3eReo9J0	C1orf198	0.146544747516101	0.031228498983904	4.69266062360648	7.80523522796229e-06	0.0547677938697709
ZkucSTsQgt0qjUgeSU	MGC72080	0.174586408323418	0.0148923894643148	11.723196518716	7.80438551760882e-12	0.0394602062463045
xopB7pPn18FJ067uDs	ZZZ3	0.054721296363696	0.0116608590830067	4.69273284019364	7.80373543686677e-06	0.0194488297639531
THIgk2JxKIq659YflI	RNF113A	0.143610580249395	0.037169463140808	3.8636710921909	7.80215648731829e-05	0.033692584690643
x7R527rdSQqPamCEBo	CXXC5	0.230917712498597	0.0225493034394647	10.2405696530056	7.79951972992567e-11	0.0290448298384233
3uIV4dICBR_VEtSEjo	TUBGCP5	0.134119843589381	0.0203406135596539	6.59369704832362	7.79797210283864e-08	0.0347695908854164
KCu5IRCxieOiUdNaSY	HLA-DPB2	0.664035351235615	0.0746006182072282	8.90120440277096	7.7979673222749e-10	0.116861543098418
HoBSf3rwrwRSOuVdPo	TSPAN3	0.205997260900868	0.013562555383914	15.1886761063622	7.79653871163288e-14	0.0313070168499443
fSXqQTrgFU3MQAdpCk	CCDC125	0.487455094969047	0.103865089688187	4.69315625136834	7.79494807043578e-06	0.0590277140423576
NqbdUs8V6OMoPh1puQ	CREBBP	0.115703547064955	0.0246530551289951	4.69327417878009	7.79250246535273e-06	0.0273477708758814
Tch.x7KS3l1LVnXBR4	FMNL3	0.32827053932021	0.0132926173640583	24.6957036623816	7.79157447441287e-18	0.0520034635800232
fXp9fn0g_A6C6q7Vx0	CHCHD2	0.0930996987051838	0.00909058842119221	10.2413281067865	7.78985622603933e-11	0.0153783247242474
BVIKgJ7FL5wXt_.SiU	KCTD3	0.304212070840719	0.0227571141216105	13.3677789378326	7.78940647292542e-13	0.0512485928108581
6u7FOec_031_D3_bqk	HIATL1	0.148778852041649	0.0384987560405434	3.86451063210897	7.78321425448962e-05	0.0429532834146628
6eUFFDoJLLpLBJJev0	PIAS1	0.117982704856226	0.0153395792771583	7.69139118645257	7.77904572448473e-09	0.0255069460492446
3AuiSKCeegC7lOFneI	CCT7	0.1037289616867	0.0268400259144729	3.86471168162197	7.7786851121013e-05	0.0241802762936051
3v0R0nE7hdSfrivl4I	METTL13	0.0721825771882501	0.0153777792113271	4.69395328130873	7.77843458315338e-06	0.0197085617032182
NkooiYR_3qKQOt.44Y	BCCIP	0.0673236794857697	0.0174195742117427	3.86482922414867	7.77603843613937e-05	0.0190379480904432
loI5Vh9.pS46oNLi50	XPNPEP1	0.114302332208682	0.00752438903064123	15.190912078471	7.77563215838638e-14	0.0205108111714329
TI1EnCEUoVeglyA6hQ	ZNF93	0.48350898972827	0.0412347379961099	11.7257684473194	7.77482054978293e-12	0.0837628230178673
KeyPr9TEqC91tc5Dv0	SCML1	3.81489231012157	0.0625099644622196	61.0285470955155	7.77328741302071e-26	0.211398174823064
lleo9w313kHt9Sh8ek	PTAR1	0.233480155654477	0.0354002386969697	6.59544015092934	7.76804122545024e-08	0.0459540704891546
KnsQ5e474oq9..Auzk	HOMER1	0.315385180543239	0.056313491371421	5.60052614147267	7.76510371563987e-07	0.0759467642183436
fp1dOCsgUnnvhFivE0	PTCD1	0.0554198929901443	0.00989522214842802	5.60067193629892	7.76235576949673e-07	0.017735033718471
EnQtQNeU4Xd7HcoFSo	GEM	0.750218733419795	0.0493809778612482	15.1924641008077	7.76115504936394e-14	0.111227107902764
u55QF4qe6roOJ6CluM	PCBD1	0.342147777863072	0.0175870479585556	19.4545314636858	7.75919015088695e-16	0.0457668317382633
BuImZn5oZppPAa_Smw	PCNA	0.165861727783501	0.0353272813573999	4.6950040141925	7.75672018056165e-06	0.0448100384966407
39RL1ol9LiqycTlU5c	RNF144A	1.68215212783404	0.0307684306940764	54.6713657436513	7.75600093396258e-25	0.120028693055945
l94e1KJw3hb3Pu6OFE	MAP2K4	0.0457504819678549	0.011834899242639	3.86572635980068	7.7558685181503e-05	0.0194385278904311
ue59Hq.dBbp.0WSft4	ILF3	0.258640681412479	0.0392100174856345	6.59629089701982	7.75347653848418e-08	0.0437177022890552
614QCoRMu.sEW1BPX4	NR4A2	0.656785200279757	0.117254097339735	5.60138379110773	7.74895323262314e-07	0.109845304297743
fp5_IblluURfVwffeM	C19orf44	0.109628270463592	0.0283562155144538	3.86611077940609	7.74724234726577e-05	0.0412833416670728
3ZI6Kh14TJSee4DDoI	CDKN3	0.188965092810485	0.0488765518719949	3.86617070094009	7.74589863435498e-05	0.034175762484013
N1URGXORAbo82RIeoo	LHFP	0.451590591700277	0.0262324893484843	17.2149347208777	7.74460206031464e-15	0.0632187515215663
BerWUlVKgqnouj6oDc	LOC642131	3.20552398679945	0.115446189225863	27.7663906300801	7.74425021666467e-19	0.18852844351859
WgE3lTuz46SJ75UQmU	SEC22C	0.0466403650175203	0.00993270412130497	4.69563619815071	7.7436858340445e-06	0.0177521413991596
6f716oPR9311dOgjkI	MAX	0.494984396280856	0.0643358578171175	7.69375606505332	7.74235450699054e-09	0.0844673936208969
00buPhOysV5Rpc5VF4	MKL1	0.125247573103211	0.0266726355614253	4.69573292878289	7.74169345266693e-06	0.0412034365122006
Z5EcikrXdrXdTXufe4	TBC1D5	0.16081962253112	0.020902425824885	7.69382577306696	7.74127572658175e-09	0.049912952442456
0eV7n7qeQurdQwuvU4	P4HA2	2.95778769493705	0.0948994703395299	31.1675890745725	7.73709825588049e-20	0.164304833660111
xWypO69AiCSipCoC8U	CORO1C	0.146466447950117	0.0311894083887417	4.69603161831652	7.73554464014535e-06	0.0315350127644297
fUQLhQgbiQlSkSWGWY	RPL36	0.0480837496024232	0.00624933424533735	7.69421953039216	7.73518499948587e-09	0.0115071319487647
uSRY1YTI0uG3.30jjU	LINC00467	0.101141712538229	0.0261571623651952	3.86669284405285	7.73420001307856e-05	0.0305236617985601
iU7tU3QlEiQdEqx9EU	SLC15A4	0.28086591568605	0.0274117702282969	10.246179409315	7.72834050573164e-11	0.0326505467127857
HMDr0a1HpZfu_eiG6o	SLC35C2	0.0908037743119629	0.0137626454472687	6.59784302806286	7.72697749727157e-08	0.0262463405485044
T8VSWtQXjXu1T7CiCg	ITGB1	0.395824842994837	0.0260476383041206	15.1961893194831	7.72652139704821e-14	0.0553557035172863
0F1BV51REuEhaAuCLQ	KLF10	0.225070121853198	0.0292480900403243	7.69520750048617	7.71992485213754e-09	0.0547320231940837
HneP1qkl.SOaSExBF4	CERK	0.272486380782761	0.0179303690187486	15.1969198457566	7.71974859737554e-14	0.0397430647333034
rvSXzV_kbASHHIfPso	IMPA1	0.157521217964402	0.0238728525028709	6.59834085371484	7.71849828437269e-08	0.0310401280866439
WS_7k3f1L.k1Lht5_k	RPL34	0.311775356542309	0.0142051393006777	21.948067522818	7.71344131869392e-17	0.0361037059835578
lA_eff9V0Exd7iFo90	ZBED9	0.262306266435906	0.0468127287818159	5.60331075034012	7.71279387065685e-07	0.0741435914922697
xpBLlSp3ju3dGm4C7g	HLA-H	0.114832371174881	0.0128919635219974	8.90728328380262	7.71270546481046e-10	0.0173576196639231
WQon_nMd3XVhVRXpMc	TEX261	0.125021934531537	0.0223118251566529	5.603393431678	7.71124629156822e-07	0.0383530619352597
HHUKlAnQOVFMgYe1OE	CASP4	0.265877988241867	0.0136619771439352	19.4611647670553	7.70913739365047e-16	0.0332317336718044
cXQU1KA_Eunks_HUuE	ASCC3	0.0973123289867571	0.0207164170266601	4.697353256672	7.70839824712205e-06	0.0238836010696386
fnVfddSC.UJNSQeLDk	FAAP24	0.0917448864361844	0.0237193555462989	3.86793335329466	7.70647962851687e-05	0.0380980715286473
igXug_iilP0dXgVJeE	CCL22	5.09449505290634	0.130160274685161	39.1401682673857	7.70038294439869e-22	0.118479828503356
T1F6U.4V4uhLRJdJ04	BCAS3	0.488108134628032	0.103902432427086	4.69775464564378	7.70017333622263e-06	0.116454538433912
fp3_eev4PoRHnmnXXk	BRF2	0.188693236594319	0.0336708853756542	5.60404736879162	7.6990176748383e-07	0.0444124524209439
WrWmVInBqLVK8BH8I4	HSPB11	0.155048548792925	0.017404947555999	8.90830313013406	7.69849677846929e-10	0.02586881616732
3.d4LruoLFKoekglSk	DHTKD1	0.129863833561263	0.0110687592196431	11.7324653092824	7.69838602215935e-12	0.0317920349229324
BorV5S78giXh7vS5fo	WFS1	1.26126834237368	0.191111319326341	6.59965274071464	7.69619999453267e-08	0.112743052181535
QqkqH0ez.vTLs1UiXo	PLD1	2.01230796721815	0.0575750360502685	34.9510500603285	7.69476000612798e-21	0.120517734976655
0VX7Th3i0bnns_Qbko	TCFL5	0.895920608017167	0.0228889430753608	39.1420698224198	7.69274688278096e-22	0.0743180968105794
ED5fq15ZEiaXt.NIrU	APOBEC3F	0.166125387080776	0.0353592887058495	4.69821065866898	7.69084017503129e-06	0.0397765605258164
3Ztd.fqgvii5X0iUsk	SHMT2	0.107776291801782	0.0163296923429657	6.60001973939264	7.68997410300123e-08	0.0194112503487241
cR9RTs8Qt_FTV7bB1I	XPR1	0.12572220300222	0.00730028663669358	17.2215433802695	7.68940749005128e-15	0.0259815249977883
xnTT3qL9TsunOS7oC4	STXBP5	0.175360301734796	0.0265693183536483	6.60010540732284	7.6885215586557e-08	0.0415240738527103
cSXdQq.0XyQQ6ie6i4	TOR1A	0.124240576430295	0.0188235836489775	6.60026160518289	7.68587387861423e-08	0.0278049606060517
WwAVaCpoRdRNl.5Rf0	SLC38A1	0.264401104125634	0.0562701023438977	4.69878484509826	7.67910508044223e-06	0.0653054427813661
iqt3lJ6C5_nUfJJwHw	MGST1	0.218034339379928	0.0563516517778357	3.86917388401533	7.67886153251896e-05	0.0697597353441811
Hm4Kedp0f9cLuvXgp4	PCID2	0.0287556045472702	0.0061196869718463	4.69886853356401	7.67739622752401e-06	0.0111403141271414
3oeDevdd_xFXQVzkl4	SUV39H1	0.0922194514625306	0.0238336083462041	3.86930296591946	7.67599365266628e-05	0.0239299825300741
WWCft1Dt6H.69TepVk	KIAA0922	0.124300222724006	0.0188307204479082	6.60092762079181	7.67459503572487e-08	0.0242713638131198
csuJYj5lPkdSdKQQiQ	PNPT1	0.403558412015058	0.0858795977817921	4.6991185617851	7.67229319915338e-06	0.0375645912930395
EZ6.7RPSTzUpNKQTe0	EEF1E1	0.0907739708779806	0.0234584311016495	3.86956700065068	7.67013090628693e-05	0.0213025938065523
9KKxIa6KOq7_E1H7DI	RASGRP2	0.26539558020407	0.0226157514186128	11.734988384496	7.66979287101824e-12	0.0622841217787501
lRSdQuKb12m14FQKd8	HIST3H2BB	0.328696007712639	0.069946449476352	4.69925221613668	7.66956678421137e-06	0.0903163707175675
HqKvflISBxL1Pt2634	CHD7	0.21888815634508	0.0163600469786225	13.3794332394705	7.66950463109347e-13	0.0357121493511089
foSe..BXfeQv74XE6k	ATP6AP2	0.0907584546373676	0.0137478780903328	6.60163365146415	7.66265738051595e-08	0.0183872536801867
05XeX4.r6D.5wPrDvk	FAM135A	0.123964668525448	0.0263775109724763	4.69963480082707	7.66176800056363e-06	0.042149459180017
uepygIiBCQlqnF5VSs	DEF6	0.148499407946835	0.0264882481520335	5.60623741874127	7.65821054939009e-07	0.0310406471548162
HJy6k7gjPy0VIolLA4	ZNF302	0.119997043213808	0.0181759922778655	6.60195280562148	7.6572674351069e-08	0.0257932222344299
uUErWUDWggjjoDThWI	RPS3A	0.0357688878359692	0.00761051589688905	4.6999294555827	7.65576723569123e-06	0.00996470399887577
cRXyV9IwlyUsTP0kSk	FCRLB	0.310853879297383	0.026486607766384	11.7362661930573	7.65535423982633e-12	0.0455496116952357
3deudXerVXr77JJ8Hs	SOCS1	0.748410612832348	0.055931476881618	13.3808483980568	7.65507703573376e-13	0.0833344219380803
i1GgEgdjkeF51lKAuI	PRKCZ	2.56917139877203	0.0924708701744843	27.7835754538075	7.64985188411765e-19	0.1994883767729
ld.ooJU8dbB4ejrUu0	RNF14	0.0956244230806507	0.0203442180939984	4.70032432010056	7.64773331011601e-06	0.0305001824134357
9cXeUALqp7Hqh52jjc	CERS2	0.115879767085836	0.0175504165441015	6.60267901873713	7.64501770888467e-08	0.0320764624928832
6uN9Nx5mtCpRap9S98	TMEM134	0.1749515015734	0.0130735847189906	13.3820604932683	7.64274222372492e-13	0.0366773797985386
QrqfR6IDofHkDnuO.c	YEATS4	0.12367779307668	0.026310745764865	4.70065706924346	7.64096998392412e-06	0.0277813423119636
6C.uqlAXqFWJ9drJIo	FUT7	1.21848296830074	0.217300035835708	5.60737582768731	7.63708760173247e-07	0.152339911033334
lroSr3SxwkKISDn_9c	ANKRD29	1.05013413973304	0.0268180828323373	39.1576887243701	7.6303249089582e-22	0.111119033114832
TlL141TdHd6FxSuHnk	COL9A2	0.36040078880404	0.0269284795365195	13.3836293399067	7.62680777728927e-13	0.0483637708690043
ckVlv.vS3FR3SrBDl0	LPAR6	3.64041621673852	0.0385636947034956	94.4000891182384	7.62458154160766e-30	0.152208328938802
ltI3VdRSUo119ydN7I	TPR	0.0629016000170041	0.0162467801588216	3.87163483484757	7.6243756800124e-05	0.0197956217861585
BZIHS4KCdW4IOiuYUU	ERCC5	0.113991116174356	0.01480109662626	7.7015317886726	7.62298117962409e-09	0.0244834202085713
ouS1E7kwoU6on7P6g8	NSUN4	0.122708078637495	0.0185806923993737	6.60406383142275	7.62171533316591e-08	0.0275821252208072
KCV7vXqgnqh_oLjq7s	DUSP2	0.326357775251577	0.0842907300907698	3.87181099155427	7.6204909129164e-05	0.0436370697464689
Q5LiSI0QT5H0l64TiQ	BMP8B	0.307961641050771	0.0655005062700628	4.70166810285443	7.62045820247351e-06	0.083926839339034
9p9edCEWPWcT1FQRFI	RBBP8	0.0586041794356392	0.0124645201106183	4.70167956050832	7.62022607834266e-06	0.0178814426102848
lppUluz8.9FzdfXtCk	ADAP1	0.483927022382252	0.0361556259876895	13.3845565983845	7.61740613061409e-13	0.0766380700430864
QZJ1UNEckE.QufiJTk	SPARC	0.651649209380881	0.0296707640070588	21.962670365544	7.61507742911195e-17	0.0980482710498055
x11MT_Ent6lfOiTEug	NAE1	0.20946527811033	0.0445481646966405	4.70199568347484	7.61382454141079e-06	0.0678981051831105
HuFNHoSf3dAH9fQZTo	FAM69A	0.401858864638337	0.0206356680690371	19.4739934415454	7.61329139731077e-16	0.047602328779784
06TJxbi90koH1SY4w4	ALDH5A1	0.544706059325859	0.0220305617688789	24.7250190458297	7.61272698823436e-18	0.0607051409225885
ZoTigHqc4R6l94xEq4	B9D1	0.537356315466946	0.0602785817281807	8.9145480875793	7.61208470047433e-10	0.0963606577316063
x1GWiLBygTrILoiLVo	ZNF79	0.258898743827383	0.046159465580075	5.60878988900466	7.61093439394275e-07	0.0586032093936889
KO9.UFXlE707tcLfX4	TPTE2	0.7979029787941	0.0679626625336515	11.740313711209	7.6098063082606e-12	0.10732644489896
6lPl9z1xF.1yqnrVp0	NAGK	0.291436903972544	0.0117868736891189	24.7255473893459	7.60954331670462e-18	0.0341256147421078
xUrHKin.gVKKSK_SYk	SYAP1	0.397392309771812	0.0338479461940595	11.7405146975079	7.60755193978555e-12	0.0498745982576094
xQox.DNS5a9IdFzukU	ATP7A	0.352172923482608	0.0180832681522425	19.4750705745043	7.60530076611113e-16	0.0569840339882555
xaRtfpt3Dt5J0KnpH8	LAMP1	0.21718291022774	0.016224776420202	13.3858800024706	7.60400885718847e-13	0.0285629733298633
Ku.kHqiEgHuvjJS0eU	MYB	1.0175575456831	0.0366128675862951	27.7923476844516	7.60212940393143e-19	0.0669025062774544
EknPgK8ep1SU0yST94	UBQLN1	0.0956946626451645	0.0124231605509727	7.70292408703288	7.60181001308112e-09	0.0234615053714756
KblNiOibpB9ooJ9kr0	HNRNPM	0.141500090348305	0.0300893837855164	4.70265829825391	7.60042460937494e-06	0.0250926413448824
c3ezqQKce017763qlE	RPAP2	0.085128951657193	0.0128873526572264	6.6056197825438	7.59562148765987e-08	0.0282512200007595
xJCOCV3tnVIRV3FBJc	NDUFAF4	0.258443216445465	0.0667302765362171	3.87295287627345	7.59535864451646e-05	0.0453806076498241
NHnpJp.ez3lEUqkjv4	USP32	0.250445481450021	0.0532530143479941	4.70293530828935	7.59482995030088e-06	0.0699148568091291
NmmkE6aG4wO0u4F6KU	MED27	0.166826520328772	0.02973907725665	5.60967372622389	7.59463509164827e-07	0.0378985759175411
xUel1HSl1N905XfFLM	COL4A3	1.8791657694797	0.0676100541273247	27.7941763800516	7.59222023569511e-19	0.158095714821482
Zn14qyI_zf.m3kQ6ck	RORA	1.02358393154319	0.0672906010768367	15.2113952790286	7.58681670407009e-14	0.102742780489536
uemnSNkU_XGAECV450	LGALS3BP	1.61027604814822	0.082673083224738	19.4776338965229	7.58632018060088e-16	0.181619507905184
c96ESCz_4SpAlQRfVU	PTPRC	0.64222190008089	0.0833611304839633	7.70409297897463	7.5840833106061e-09	0.1041844643548
6RqbXHiT464o6T7Wzo	SUPT5H	0.11803105220013	0.013236871727864	8.91683885941659	7.58064140270839e-10	0.0268095167055913
lXorniFQmo4SEnIj5A	IFT122	0.088929276352967	0.0229559155148663	3.87391547487514	7.57423898042564e-05	0.0414871207186354
TofSgA0FSRSScUFFPU	ZFP36L2	0.327108125322419	0.0582942257327418	5.6113297879981	7.56419253433947e-07	0.0525339852897111
l6KU4uK4CXjv.VpS74	VPS33B	0.0463103755834973	0.0060099297561969	7.70564340385945	7.56063701911992e-09	0.0182914781451218
ct43aCcJKtqXryx_ho	RNA5S9	1.83152463604301	0.277177736765691	6.60776243220164	7.55984080251646e-08	0.111392204429862
o4O7F4LZFGiJGIhWL0	COX6A1	0.0953855766737833	0.00712345770216017	13.3903478706496	7.55896065056503e-13	0.0179811806494645
ouU0YUU0Ndn9CKSEtU	ITGB7	0.420824444918777	0.0276594889979537	15.2144692532067	7.55889674036172e-14	0.0379867857372058
HvXZMzb7kSjQTjrh6g	BORA	0.0622764219568287	0.00942430315869988	6.60806649660239	7.55477740101687e-08	0.0183383590861348
riguY2oF1zMfW.l2a8	RPL36A	0.293754942078021	0.0523454991522275	5.61184718525165	7.55470753999599e-07	0.0482819851380787
i7XkuXqGVbLgi47pUA	SNHG7	0.273389125055607	0.0581053335006544	4.70506076783	7.55204495901159e-06	0.0707040721905606
cvYiWLe6kd3l9ORe18	CD81	0.069646031429565	0.00404016858949592	17.2383973309031	7.5504986873612e-15	0.0125884583200244
xrxZO2euCKK.lEqOxc	FCHO1	0.188620177618325	0.0211477379227711	8.9191656482193	7.54884249140244e-10	0.0504962202865439
BWgLcUJ7mkQwJRoAQo	GPR65	0.2594340695287	0.0392567978940692	6.60864062903853	7.54522635481027e-08	0.0503424456899674
WrI7P01ciStJdfVcOY	SLC18B1	0.49208090344431	0.0198929264596778	24.7364762767177	7.54399964904967e-18	0.0647840389946408
6VQofeoEor24T2icXg	PCK2	0.123840008894335	0.0220642581489867	5.61269760615192	7.53914439892327e-07	0.0262609186850985
xVb14TRJJdQRCnUIXI	CD74	0.0758652190053726	0.0056647352774863	13.3925444507334	7.53691549908361e-13	0.0129584019764537
BdJt1U56nRxOpSV_dw	PFKL	0.0768083147289364	0.0198175236961798	3.87577761512871	7.53355540012113e-05	0.0238223100129814
HIIV4VHir__4g_eCUY	ACAD11	0.311348377000795	0.0661594219847739	4.70603230288876	7.5325716237093e-06	0.0456765869623525
fpizEUNKIqyeXkyiXY	PTDSS1	0.0453135313137892	0.00807228052243932	5.61347331622417	7.52497760587386e-07	0.0140864811123143
ipuBoOoq_3JO1LOLro	HNRNPH1	0.265326829035852	0.0344221208759538	7.70803257568017	7.52465471048708e-09	0.0303086340529497
ouJEVE.0eU83qEkgUo	CHI3L2	9.17005380166198	0.0703204010797234	130.403889353045	7.52264733214326e-33	0.205904422913048
BqXVILpAFUn0NKAUV0	GAS2L3	0.178522679797949	0.0318017900729493	5.61360474955781	7.5225799853566e-07	0.0596690151632641
WgoqUI6ASIhS4op97o	TRMT12	0.105068635488277	0.0187164678331325	5.61370000071706	7.52084290075956e-07	0.0275658225426285
cdU6bv6M3nl7rSgX5E	ATPAF2	0.0747894905811594	0.0133220325830427	5.61396994902695	7.51592215197112e-07	0.0327181229069625
0QXuO6kiOKUIGiCook	PEX11A	0.42399008992002	0.0360877850881512	11.7488532167974	7.51463486376083e-12	0.0671656901335758
Z6oT_UHYECniCSURb4	RLF	0.241301605928069	0.0512645515947743	4.70698754639387	7.51347567437501e-06	0.046500181509503
6XY3xT6X9V6UstRdLI	SGMS1	0.640411066210681	0.0230288087705644	27.8091269327513	7.51171220748563e-19	0.0857392516258893
3T0lwrUWUKRTaEReVM	TCF19	0.236776066429296	0.0201526503274884	11.7491279103042	7.51159416713345e-12	0.0528665235953427
B6KklUShr84kRDzJ_8	CAPN2	0.384459581778552	0.032722213182598	11.7491925021444	7.51087935984804e-12	0.0801006559683932
359TSD1KtElUEgkkuU	PITPNA	0.117216627829518	0.0131376983810855	8.92215854173329	7.50814490023844e-10	0.0370413637349172
ZXqR_l.t53S7fV.hOo	DHRS11	0.148735483405064	0.0166699788705121	8.92235584462352	7.5054700201494e-10	0.0453572438713248
6KiMMn9UVx.uStMXVQ	ATM	0.141964849017073	0.0159111370399852	8.92235725582092	7.50545089180891e-10	0.0261736883825841
lt.5d.7xUr2NCqHo5U	MED14	0.0898975886113844	0.0135979822264164	6.6110976698251	7.50449392589098e-08	0.0270926602288356
0gZMaTvDh3jrtdd6kk	NDEL1	0.0612058588371506	0.0157861016461434	3.87719908367011	7.50265169825967e-05	0.0174204036887254
xXl7eXuF7sbPEp.KFI	TRIM44	0.0873503564820321	0.0225286865051958	3.87729468657156	7.50057793825329e-05	0.0230843537380583
fSpP_tQvufNUyUoB3k	IL1A	5.02769459326752	0.0660971927578174	76.0651758946736	7.50020028103971e-28	0.211501523092636
9lTN2w7t7tR8iXRhek	EFR3B	4.77442369522248	0.0871882284675728	54.7599576128352	7.49848555939971e-25	0.24339656444228
BdfkNO6EUNEAsCV674	PKIA	0.0967505984178401	0.020551389140117	4.70774008307689	7.49846737716569e-06	0.0323741781485436
NE1PefUZOn3lPr3fVU	NGRN	0.129100337661636	0.0229919512776674	5.61502310536966	7.49675672340783e-07	0.0404206290810588
lUpFHJenQM9VKiHnu4	SORBS3	1.02409948559375	0.0465912413471557	21.9805151350893	7.49665322886227e-17	0.123529414427557
KoCewdGCV4hecVcI2I	RNF10	0.154450008896408	0.0233603365660659	6.61163457382577	7.49562376910187e-08	0.0416763104579725
ckLEgoNz3SSpMqRkek	YEATS2	0.149740540208509	0.0266668595919972	5.61522963331783	7.49300427985699e-07	0.0306417061231437
3QKRL8ij6qCogYFSok	NDNL2	0.250836004807219	0.0379375765816429	6.61180885572413	7.49274681879042e-08	0.0550991635991984
Bo.eJO5IetycvUoHrk	PTBP2	0.128525473750413	0.0331432863803081	3.87787355410764	7.48803415461505e-05	0.0349380419583485
3jsLpUVQ.7BOOQu3pE	PDS5A	0.0539577107465442	0.0114601850945989	4.70827567802322	7.4878046489594e-06	0.0191150679908818
Wnte91N1P31TnsFUp0	PATL1	0.100060868594186	0.0112129279141114	8.92370568692053	7.48719656267643e-10	0.0208821048181568
6JASaRjql.fNYiLiJk	GRB2	0.158434486450584	0.0408555826030913	3.87791524085613	7.48713166077739e-05	0.0322757674485053
o4KOUIOIAJCq.tSulU	CRTC2	0.176219276329108	0.0197470750450295	8.92381661219564	7.4856969807963e-10	0.0375042157584048
ZXSYrSYhRIiRI7QoSc	NAA10	0.105896914116735	0.0188574907859082	5.61564183268058	7.48552079881092e-07	0.025118042879945
c94iSk_ze37_u8T6RU	DNAJC15	0.426319484292956	0.0247192932397367	17.2464269167551	7.4852442752102e-15	0.0511696120403955
ZrCHlEtVSopEe7.Hj4	SLFN5	1.80014177545798	0.0410496559959155	43.8527858951388	7.4839505710218e-23	0.141723805940538
cZ3e3p7G3rvdDn.ckE	GAD1	1.7014532796549	0.0544997067599539	31.2194942102903	7.483281030469e-20	0.179179453025982
ir_h054gFRKAke1Kyg	MFAP1	0.0835244480347916	0.0148730306285397	5.6158324500803	7.48206277010878e-07	0.0220292950665591
u6BXVx3hVcSEFCRw1U	YDJC	0.117183762441973	0.0248872001031171	4.70859566188387	7.4814418633887e-06	0.0360248691533325
or6rqfoESu7Em57LoI	ERH	0.0982097018503685	0.0253232947144154	3.87823555180844	7.48020086825565e-05	0.0196397425423124
HbqiKmwPt_4O7nBQBU	HIST1H3D	0.637068527607613	0.0326824454487367	19.4926823516579	7.47588510978697e-16	0.0815833904439651
0hRBOKUeiGTOLCpHho	BID	0.317573174810186	0.0237016402699559	13.3987846914013	7.4746533734728e-13	0.0427431508843559
rl.q65L1dYITgOHRHo	ZNF101	0.0971412365812355	0.0250449029718881	3.87868288770264	7.47053265386707e-05	0.0391611099843293
EpRLux56DvU1AI7J9I	SCAF11	0.056187180816194	0.010003830251523	5.61656679526724	7.46875639980457e-07	0.016276948894682
flQJu581Cq9Jz14fRo	MAP6D1	0.0904783580868038	0.0233260074724493	3.87886174664349	7.4666706167853e-05	0.0404079535021933
QukxEiSW7kgU4wVQOo	ABCB7	0.090175460062625	0.0160549114553	5.6166899651668	7.46652696852752e-07	0.0222341816859313
lhXEuXqnWfEMtdXe9c	RPUSD3	0.0783735810395684	0.013953127155176	5.61691871420345	7.46238834437119e-07	0.0215850566425995
QXiUguq58x1QF_LtSU	MARCKSL1	0.33581999874957	0.0327064401922229	10.267702531241	7.46147759137558e-11	0.0331095539051053
T_bfHe90mEvl57Swno	SNORD16	0.32831067279496	0.0425695317764097	7.71233929749013	7.46024351786505e-09	0.0532055248504853
KkCW8s3nZNUfxNIvSE	ZNF195	0.077319417261055	0.0164171565165017	4.70967168908559	7.46008653632973e-06	0.0255813140180082
WhXUieoBcUQjcC96e0	CLDND1	0.0706888434756522	0.00791963288332384	8.9257727620809	7.45930353808998e-10	0.0164923198661289
EWX22SIXfnq.QQG5T4	ITM2A	0.82298269509302	0.0209936585922437	39.2014898916704	7.45807920549513e-22	0.0499350409413698
0eKzAzLe6i4ikBS1xU	HLTF	0.1389711475629	0.0358240280389728	3.87927196270933	7.45782076737454e-05	0.0395450808938937
oV3gR9T7zlFSAXHovE	ITM2B	1.51192372477372	0.0159994486010939	94.4984894460893	7.45704883905188e-30	0.070974417170426
coIgFKiVf448PRfUu0	IL10	1.60452608672072	0.0729770037801257	21.9867355962577	7.45582585488221e-17	0.138885412861959
ZbnsZYTQjog6gtQqu4	HNRNPM	0.134680233425017	0.0239759755709699	5.61729940983456	7.45550593100474e-07	0.0221493324569397
ZSoLr4Vda6elHeci1M	WASH7P	0.374383171412298	0.027937539414282	13.4007210105593	7.45544313797059e-13	0.0710713961959513
fJyXPzrz2.ywve6iQo	SNX24	0.319488920920206	0.0678333715778783	4.70990772666233	7.45541049946277e-06	0.0853659976715814
ol6DSDR6cLfnn59_dI	LINC00339	0.410110475075433	0.0186525638913877	21.9868151887039	7.45530496625142e-17	0.0591928345493815
WrV7vs.7Jf9ep9J1XE	CNOT1	0.032027971846762	0.00680009502696634	4.70993004064686	7.45496860441963e-06	0.011561234520128
rST4glD0UqFI557xaU	COPB1	0.0531395850297463	0.0136978470080944	3.87941148695448	7.45481319673189e-05	0.0153277407062966
xFL_rhKnrAtUu8ji4U	PDGFD	0.827591526187609	0.0543533219253045	15.2261443619754	7.45382975104771e-14	0.124649954995467
Z1bpf1V.pJFjoo4eog	RSG1	0.106954926538922	0.0227076593116837	4.71008152231222	7.45196945596621e-06	0.0431759257955018
Hk3WKcxF4KBL.hbWlU	NOA1	0.101609808104021	0.00758219848662239	13.4011010504797	7.45167881859443e-13	0.0204243015576069
Kwgz0QT4FSimifkuJY	ZNF652	0.617929635847103	0.0934227930473412	6.61433485010422	7.45117806443011e-08	0.0527710555930853
0eL0eWt7fWJ5ve1_04	PKMYT1	0.13754164145768	0.0292009965398834	4.71016943787596	7.45022941191015e-06	0.0445489311161401
cu6ef6frgle7rI_hNE	ZDHHC13	0.093498176314732	0.019850192343556	4.71018994156419	7.44982365911579e-06	0.0306191222707619
rmX0CK4J7aHECoLG60	PRDX2	1.24528279130932	0.0163659450040533	76.0898799917086	7.44882468693456e-28	0.0743889026102722
leXnk3.e_VTUWUn1fQ	STAT6	0.128724599843691	0.0144199740959495	8.92682601141765	7.4451327708582e-10	0.0276846625439071
xRJygl8AO056z6nEFo	LRRK2	3.59051466392864	0.0471861069927206	76.0926232902101	7.44314235649481e-28	0.17119515078288
x07tL.REl5E294Tlf8	TMEM19	0.225369099204021	0.0401147458292701	5.61811110964533	7.44085365202984e-07	0.0443923642156202
6p1QpTggjsQpuXQsVY	STARD10	0.170962863384986	0.0362921886499007	4.71073445126748	7.43905660905009e-06	0.0415053586856529
Z56L7qk1dQpeHV.Rxc	ANKZF1	0.363119379087652	0.0548914538449338	6.61522611722855	7.4365684514684e-08	0.0554312689108015
9niJ6n9d7hTVpewTN4	GAS6	0.976327043161271	0.0565902946493151	17.2525527426828	7.43585770372037e-15	0.135383088192125
o1z4otBJIo4o5BE34I	TAF1D	0.183027379394177	0.0471676235560762	3.88036041664429	7.43439142323329e-05	0.0427364033886195
N8EYzSRPV_000K76dI	ARL5A	0.0489347113584223	0.0126105346342623	3.88046286518802	7.43219010773539e-05	0.0158941921952079
xhTWAXm1euO90JdoLo	HSBP1	0.369245700916129	0.00941724110050875	39.2095409871349	7.42686347687964e-22	0.0426451635010892
9ogng5BAT4nJRLkl6U	PSMA5	0.0559883094985311	0.00846256212516986	6.61599982019717	7.42391015394007e-08	0.0131036875089591
N.Wut9W_6iSuirohcA	ZNF524	0.205555017490479	0.0230218897778015	8.92867698848434	7.42029715234386e-10	0.0439814148601323
uNk5CT4XFEXE1R7l5M	PPM1A	0.216054209020526	0.0384486955996848	5.61928579502441	7.41970204658727e-07	0.0535321942926575
NQKCV.IPIt_KhJHBKU	PRKRA	0.28649841183434	0.0243668417848592	11.7577162590009	7.41717151131763e-12	0.0351745148880098
BHeQIk3nkVCXiWvXvQ	PDLIM5	0.126974397953937	0.0225954888957762	5.61945787230442	7.41660885007365e-07	0.0502992932855395
fueRH8SSfX9.U6R5cs	AP1S2	0.404034457931936	0.0129359199770143	31.2335310244543	7.41614684593223e-20	0.0365617190285495
9X1L7fgSXh16SVzoL0	NBPF9	0.390389457867698	0.100583723062355	3.88123889215837	7.41553747303338e-05	0.0487417744295171
uqvDn.oIIE5Y14p.p4	KIAA0368	0.105585824561017	0.0224081971813328	4.71192857268212	7.4155007842887e-06	0.0244833237128307
HpSYoruoTDJeLn6vFM	ARHGAP19	0.12261911319369	0.013732617542186	8.92904159145253	7.4154152687678e-10	0.0265811486608883
WUeXQjlQjdeUAQqLbo	CETP	1.45189368382568	0.0464845870335303	31.2338729131529	7.41451956306183e-20	0.141288408045325
fdpVJc.Vl1P479Sv9A	RER1	0.0873839331895698	0.0185448051120805	4.71204375896332	7.41323266356805e-06	0.0258171208214439
9iFJelBOuAVl3HgDEA	RAMP2-AS1	0.516842831899129	0.0919687745907086	5.61976425367468	7.41110477565376e-07	0.0419290149859105
uV7ued.rpMIKh6e7z0	SFT2D1	0.0637784767723201	0.00418741202917082	15.2310009925031	7.41057429522343e-14	0.0132992833510491
rjEHulOHigKJ0ZUiHo	IGFBP3	1.17225113128202	0.0679338381004185	17.2557765623255	7.41000405744782e-15	0.150550570127775
lTP0kv5R7h7ekJVSOk	IREB2	0.094145920985824	0.0199791021201419	4.71221981947381	7.40976726707846e-06	0.030449632772308
Trc1Y6p.17JeRNvoBk	SNORA18	0.392533948787946	0.0382139365735321	10.2720102660092	7.40923208380084e-11	0.0572278055743333
Tro0gyHREvl4JL6oO4	LRRC1	0.252150068405629	0.0535093787620432	4.71225931302516	7.40899014712929e-06	0.0736645819443409
fkk3u29x4kZ93l2deE	RPS6KA2	0.75994151860307	0.135223154904125	5.61990673225954	7.40854662746015e-07	0.115408781651434
BheFnLKivz0jZ6SXac	MTOR	0.08674224324802	0.0223472036496236	3.88157035699099	7.40843639358963e-05	0.0248908375107991
Q7mVIU1KOCKpX7vlVE	SULT1A3	0.167588890647087	0.0187677888880262	8.92960229076363	7.40791427699416e-10	0.0413693228877633
issrn9eNV.mI57q5wQ	KCTD14	2.63212783512348	0.0480375277437087	54.7931577404752	7.40429731837216e-25	0.209268009505409
lo1eNU.13htRdcVTKI	CDK2	0.0959394173072673	0.0203575813178799	4.71271197738037	7.40008905213926e-06	0.0227232018130302
9lroINV63W4m1P_6Bc	ATF4	0.40215070042828	0.0853317473899299	4.7127911091592	7.39853416258425e-06	0.0651970729807256
Q6NBB5x3agh13HRJ4I	REEP5	0.264180327175309	0.0257157866396957	10.2730797574557	7.39632025793814e-11	0.0353688908246463
ilfXdUwjoQC797NHu0	ZNF550	0.208223085996272	0.0441777400423615	4.71330325626911	7.38847899590588e-06	0.0498476302372652
fMt4t9d3hC8qTofhUk	ZNF211	0.119351897627061	0.0180339278764648	6.61818647854422	7.38825624175424e-08	0.0362088548732258
olCbXUp.hbtYDniPqA	STT3A	0.174095560760616	0.0369368475545458	4.71333024572614	7.38794949612135e-06	0.0305651671378279
NiJ34UuDRSWMYG35QQ	GPX7	2.68934896695825	0.0206058519972083	130.513844674931	7.38750292206359e-33	0.136075456466231
QUk.7eoIiHFU38UVXI	MAP3K13	0.175125881723174	0.0451053481392546	3.88259683048016	7.38649050913998e-05	0.0591668132136538
fUleogerJK6eH38JF8	ZHX2	0.259355723294436	0.0220524700715146	11.7608468554027	7.38306193030477e-12	0.0523588559370672
cUBHdXFT15Sd5df9B0	BTG2	0.224728639254374	0.0476760801073597	4.71365596224182	7.38156244758103e-06	0.0357640957307245
xnH8l_U9d_f9JLLelQ	NPHP3	0.312993468708874	0.0350431906284666	8.93164871964085	7.38060444579058e-10	0.0588421385424245
WSXAKYaaPhILOPoiVE	CDC42SE2	0.198274324897842	0.0221990162745784	8.93167167614086	7.38029868537745e-10	0.0379756126233295
cenjghL3z_jikk3kXk	CHMP5	0.115757597399651	0.0129595259234612	8.93224012076632	7.37273171798745e-10	0.0210473062910459
oVE0nUK0q48J7Suqws	RBM33	0.125160120130818	0.0322304117764112	3.88329261813591	7.37165290506896e-05	0.0519387152780271
Ql1H6oV5du2383lzx0	SPOCK2	0.69969645018777	0.0680959843596512	10.2751499485241	7.3713938354107e-11	0.0996791247162255
fnng6tJM3e.k6.korY	HADH	0.193181801678384	0.029184799607833	6.61926085750937	7.37080370327038e-08	0.0279936938112715
Trg5RNfpqvOhd_TtMk	PHKB	0.198935958001922	0.0115253193595144	17.2607761916547	7.37009483308977e-15	0.032902937889038
3XURH31AKCRW_LX.io	NSF	0.176877693601224	0.0131905423651742	13.4094329637437	7.36964775874407e-13	0.0360017463626364
KX4InVaVe0S0tt0.tQ	CAB39L	0.282561029969506	0.0163698418355182	17.2610726975031	7.36773506112054e-15	0.0577434985333495
oedyAsyOlAoW.7Pn14	PRKAR1A	10.9858618691322	0.0756271371257313	145.263489888135	7.36497415503789e-34	0.189921142169136
ZpX0eX_ddU7zlSb_Oo	FKBP1A	0.748147967734464	0.0302072785857498	24.7671423167329	7.3632186018194e-18	0.0711930538810383
ce6qKdK7eiqv7l4wbA	ARSA	0.41992300846845	0.0470073577858247	8.93313362520196	7.36085401461031e-10	0.0638725961281758
NGgYGkd8Ur8WklDVLU	NET1	0.155150223307596	0.0329074965657025	4.71473796245259	7.36038639747218e-06	0.0518061993723261
BZVzUkoJJSONBhlf.U	LINC01278	0.0998398262092904	0.0257065009479898	3.88383570410028	7.36009307874833e-05	0.0345663688194988
Nnunn0fI5LiETL671g	ERRFI1	0.627458856123468	0.0610588077427515	10.2763037687705	7.35753918811097e-11	0.100276861175192
EVK3TX0oP_S9DiCKiE	UGDH	0.147532260755795	0.0262379146985563	5.62286532488472	7.35563341859748e-07	0.0299897210215331
Ne795C5TX7Eu8IqwTo	ZEB2	0.304440330091908	0.0645684119224956	4.71500414873672	7.35518648715613e-06	0.0847143931953585
x3XVcjlOfX.t7xr5Ts	PDHB	0.0445080980385826	0.00943963199658167	4.71502470167271	7.35478514724428e-06	0.0131072202664509
6oOKEK4x3ie6HgekhE	RCN1	0.293267705007169	0.0118402238781949	24.7687634984043	7.35378842060507e-18	0.0321666625772745
0P4XS5XhxB6A5QAdi0	SMG1P2	0.545183571572767	0.0463448278332826	11.7636335500904	7.35283718376624e-12	0.0631317811809449
co1ApG.xhIIJfCEVuk	CHEK2	0.0987183533429889	0.0127877729458566	7.71974555389452	7.35081734668001e-09	0.030382250997281
0D5HTuh6hbmJ5bury0	GPER1	1.03778442880398	0.053192323867674	19.5100411740924	7.35057895358077e-16	0.073190635910525
cnpo3LhSMzIKHklHj0	F13A1	5.54501206326187	0.0812167211559685	68.2742664852627	7.35007794843014e-27	0.217918676249498
6rtQQSd506d0CBSaF4	POGZ	0.100752350300829	0.0259379296538054	3.8843636190542	7.34887414927379e-05	0.0441382673223319
B1eVUDTSvXavwiC63A	ZNF106	0.0674074127707783	0.00873144074096903	7.72007905344809	7.34592951956536e-09	0.0192631465379889
HnsnX6pArHDV.SRVR0	SF3B4	0.130914228307157	0.0197726639159326	6.62097069285982	7.34311717187408e-08	0.0242818433215181
H10pNT1DQgOOud5NLo	HTATIP2	0.171000635842397	0.00990458752212435	17.2647912354174	7.33820765319468e-15	0.0280193641453103
lSXh15eMnXu1U56114	R3HDM4	0.139211259299964	0.0135443824655328	10.2781547740713	7.33536977376691e-11	0.0258885510133446
Bot.TfekkgNTglalSg	ZNF143	0.0723465171554988	0.0153401189976657	4.71616401192898	7.33257322127199e-06	0.0232977631034536
rih5t.9HhXOP0e4sq4	PROSER2	0.559343927103549	0.0625959673472929	8.93578214072826	7.32576347184339e-10	0.100736725283947
oUm.Se6n3FFHCWdFyI	TARSL2	0.143026479726394	0.0368100825275123	3.88552456027486	7.3242647189417e-05	0.0510671619632089
lndF69.zqh.2._pB1I	LDB2	0.408705223104147	0.0457371581157658	8.93595579484123	7.32346881312445e-10	0.0905770677942557
Ko6INenlO6_OUlXUiA	CMPK2	1.14348745105843	0.0519597817663886	22.0071642371316	7.32337161907272e-17	0.122048919672907
39eohTVUX91pd4h.i0	CLUHP3	0.475397238833071	0.0462484210738781	10.2792101393832	7.32276094101537e-11	0.0760972316706413
uoCUnVfddwc_gZSAtI	DCP1A	0.130410757744317	0.0145932804956898	8.9363565500461	7.31817611246552e-10	0.0330024689277904
uhUB_6CzTu8L3e3e.c	CRY1	2.27348815044585	0.0414682664314873	54.8247695428031	7.31576421334283e-25	0.144150379070286
NeBlBTXhWUud_t14uw	C17orf62	0.119545431050339	0.018050756435242	6.62273802647629	7.3146134987231e-08	0.0276807445063096
uo5XRPrn910105Vf5Q	NLRX1	0.0959999936260036	0.0170656003038966	5.6253511108006	7.31148028909119e-07	0.0266710515922814
ZvGex87PV7F4Efvnl0	FAM117B	0.686354464893391	0.0219591502553326	31.255966506569	7.31014840295582e-20	0.0579998809916663
6iEdgtIKeqSNH0JCVU	TRIM27	0.100622927574559	0.0258921576304201	3.88623184714198	7.30931358465643e-05	0.0367762934294503
fiOilAZliKCulCpVOA	SCYL1	0.0909061199181104	0.0137254764446517	6.62316680114467	7.30771559108108e-08	0.0259125694820558
uFReUV6gXR73d.SXIU	TMED9	0.255624021928361	0.0454396143703519	5.62557639342883	7.30749242180768e-07	0.0327014551041974
QemBfoioOePt_FAVEk	RFTN1	0.114521121165659	0.00853617803050221	13.4159714987717	7.30593417963446e-13	0.0173502373099675
0XoTjlwtfQv.lknV60	GPR63	0.298526629299145	0.0334015843529132	8.93749907624092	7.30310888380695e-10	0.058710313728549
oiVKryIQl_kEyQjXp0	SLFN13	0.581739402106643	0.0494328393924651	11.7682781174677	7.30274866201419e-12	0.0870409783722882
QLsXPxICPAeUXmpE9U	FMNL2	1.09025349018585	0.0495334241744825	22.0104607819036	7.3022291741662e-17	0.122054984581691
Nic3g59cAJitXUBb7Q	IL12A	0.394238178335541	0.0510462687096161	7.72315368588878	7.30102657114368e-09	0.0632388388976307
cAtHiggDCr0rErklrk	RGPD2	0.647451818289364	0.0724406714030199	8.93768384182002	7.30067530442514e-10	0.121380988115468
QhTXPwen0l1UX30lF0	SELL	3.22967646466595	0.130343974301356	24.7781033375499	7.29970522151449e-18	0.118853592272954
TJyhF7rN.D7N19IL_c	DSTN	0.20065417458487	0.0516257742794584	3.88670537895853	7.29932138118857e-05	0.0350636486794609
9CuQfX2ttWDWr01hFI	RPL12	0.0540511510754043	0.008160271228726	6.62369540918346	7.29922094576256e-08	0.0115852630127152
6t9QHAl5CZRD3C5ZfU	YTHDC2	0.0966501495487171	0.0204858972807471	4.71788705294105	7.29911318316361e-06	0.0369348981871235
xEe5qK4QSJAkmSq0qI	AEN	0.217253078640608	0.0460471877012134	4.71805314257841	7.29589624966436e-06	0.0441742420659859
fpe7eXX6h7ourldLAk	C21orf2	0.153730559969033	0.0232081321574327	6.62399537051061	7.29440519366231e-08	0.0384695282851937
3J6InEF0qRLqAo4kpU	ERICH5	0.935314430325087	0.0541567551781957	17.2705035087046	7.29308946593832e-15	0.116504388013956
BhV3kDu0t1AiLN1VQM	GLRX5	0.0486426570925757	0.0125141265329693	3.88701975838454	7.29269532921107e-05	0.013453365564426
xRIDn5JcKSr.SFurVI	ZSCAN18	1.09946016993363	0.0563288590017041	19.5185947206985	7.28964364322709e-16	0.0898173188070064
fIAk8VP_aUL1YYinoU	DENND1A	0.311955654903471	0.047091833492986	6.62441089599822	7.28773957834808e-08	0.0451635921906719
6u6A.5eC11FwAXjlPo	PYHIN1	2.84823379328623	0.114939660782429	24.7802522984446	7.28732040194033e-18	0.22314611917654
rkiktz5Chff55S80yk	EIF4G2	0.0475438611531072	0.0122300020451777	3.88747777616717	7.28305300332766e-05	0.0134236180009315
EDUn7DWVAJpJQ2iZig	PLEKHA4	0.601319962341521	0.0510883105905726	11.7702064403845	7.28205782594991e-12	0.0934745146550965
Nl4iJ4IpAnApQMVCXI	ENSA	0.223673899506838	0.0146712844319012	15.2456930778659	7.28130933711491e-14	0.0321688932817403
HJ3SL97jj__JfnoQus	PER2	0.125164519774404	0.0222432177045041	5.62708693666469	7.28081177659845e-07	0.0290167819171869
0KSAfVflH1AQF2lVNU	LCP2	0.121384341795016	0.0312223024998543	3.88774472336186	7.27743923703922e-05	0.0533363840109618
cmUr7Q6XTnqEpSj0bA	WDR90	0.231435420955276	0.029959029060274	7.72506413641294	7.27327003456111e-09	0.0478704902317666
BqC3iYt1wMd6n8n3Uk	ZC3HAV1	0.141791365462476	0.0364693006281221	3.88796502867781	7.27280969811384e-05	0.0420141550480717
6epeZ6CTNW4Au8uXys	IFNLR1	0.888488453449043	0.0358509855924989	24.7828180666514	7.27256221320519e-18	0.0817145589744715
Z1dBNIEOdC39CUbeJI	SLC12A6	0.50731793475294	0.0182131097133672	27.8545477810746	7.27255147907954e-19	0.0681265631575158
W0X27t9Lt0_01efe.o	RBM22	0.022952724965076	0.00486362425667942	4.71926360955085	7.27249555539927e-06	0.00981098489307364
oLp5.f_uFdSq6DaLu0	ZDHHC14	3.41749205549373	0.0870685874517503	39.2505742370928	7.26987761482796e-22	0.159418935934882
fEe0fhQx4V38XZUZoQ	RAC1	0.0872764072834131	0.00741429353228953	11.7713719996816	7.26958111700753e-12	0.0175734544049011
ognEUXgHSS0XTfJeCg	SGOL1	0.171551039409247	0.0258916472794898	6.62572904525632	7.26663658486731e-08	0.0379629146713439
W5VJUF3qBKSdc3kB7s	SLC2A6	0.328674556101647	0.0190272493223752	17.2738870728487	7.26650130757419e-15	0.0393662102112915
Qkun0egA67pyT9X_LQ	HOPX	1.65455212125435	0.108508641578457	15.2481138569782	7.26023777980417e-14	0.179264273332974
BUX_PpYB0uPpEIsr5I	OAS2	0.968573960416459	0.039078212092159	24.7855239163002	7.2570321234646e-18	0.0722648710561837
3VKpUgXFYzoj6gYAoY	SDHAF4	0.13347004176353	0.0343223756335449	3.88871805345207	7.25700848252707e-05	0.0394526688545665
fUp2H0qtLvXtUBVESA	ADHFE1	0.195899412064228	0.0295634274315466	6.6264107068718	7.25574847491794e-08	0.0568232294014272
odcKH9X0U.9yrMuUeE	DMC1	0.322218422582774	0.0313289224650531	10.2850145242692	7.25381721760972e-11	0.0680827023108671
EqOhegEJF1UBE0UdXI	CYFIP2	0.0667339106204957	0.00566845189825206	11.7728635292952	7.25364762595904e-12	0.0144511967135164
Zh95B7LVJKB7ghSeV4	PRPF38A	0.0661965910221931	0.0117606607705977	5.6286455594135	7.25338817403331e-07	0.022980203954942
lekrQ59WhGjR.7ePUk	MCM7	0.0846153289262954	0.0150325639189345	5.62880220450731	7.2506379923497e-07	0.016664745672234
oX1enTfpfqi_X8p_LU	CCBL1	0.187198521174453	0.0396572914131216	4.72040612215171	7.25048005795225e-06	0.0452829800221121
Q8nLuus5F7LVJx0Ip4	LRRC37BP1	0.779965708028674	0.138565718738947	5.62885044819852	7.24979120765146e-07	0.0626819265950685
TPhZPdbnp.H_Sgnfok	RSC1A1	0.180540158019457	0.0272439837729842	6.62678995567766	7.24969813650991e-08	0.0493135438534724
H5OvxXeLzv33LiTl54	SPCS3	0.245238726693887	0.023843441766927	10.2853744476628	7.24956447575912e-11	0.0421972643656732
Kz0go7VugDuleKOW3U	CRELD2	0.743603508357108	0.0631594348765328	11.7734351140212	7.24755125762018e-12	0.0519904344215917
K65bk0UDgL_z8GKK58	FYTTD1	0.607458935183705	0.0398342670563907	15.2496576458597	7.24683322546409e-14	0.0536407987828321
iXi8U0ucO9d.6sy91I	ZNF529	0.182794082394195	0.0275833099939737	6.62698140412197	7.24664586501991e-08	0.0400725450735368
En_ZM0p8oe6inwvkjk	PIGY	0.0660737001393165	0.00642381957100104	10.2857341195559	7.2453173063483e-11	0.0153780896240294
Ev0skz636T9_ke6954	UHMK1	0.0435248509152215	0.0065676886733595	6.62711847042495	7.24446143331331e-08	0.0127454180449747
0okqkpgXf3_SFgS4Ak	ARHGAP17	0.266749144092783	0.02983109627989	8.94198260734408	7.24429382007969e-10	0.046483199869129
HXxXftQktCIJfp1e4I	CHI3L2	10.3714074799861	0.0641212990400189	161.746683789315	7.24114599606472e-35	0.185881895781756
xuPF55OALk6qFe5N7k	NRIP1	3.03269494354716	0.0320477534500148	94.6305003337375	7.23831418491875e-30	0.154844683702595
fwd6e_5MoXELqeq_us	STAG3L3	0.441270564656289	0.113447521635493	3.88964481810445	7.23761031265687e-05	0.0638565548909655
HKUvV1KJDhLfz2ifwo	CRYZL1	0.233144965312846	0.0599360895147633	3.88989283752686	7.23242810740168e-05	0.0550868282350269
o.qCfjpSN13lxVJQio	ZG16B	0.547536112418605	0.0612234311487573	8.94324447593002	7.22782991217871e-10	0.0979546333133188
0tMly5PHRu3uiOeuwE	B3GALNT1	1.52541301742209	0.0278071051689889	54.8569514212959	7.22677060903662e-25	0.117235102215695
xoQoh1bJOFXujuUuEA	CAPRIN2	0.137093027965895	0.0352408230678826	3.89017667668602	7.22650218231999e-05	0.0484029765139359
f0O9LnSs7LCx7LXuqk	KBTBD8	0.556809624988413	0.025282795574546	22.0232617610132	7.22073283817319e-17	0.0561239018986451
EHVCiHwg6SOi6UO_JE	NT5C3A	0.24756453280324	0.0210225028413929	11.7761683597345	7.2184730948102e-12	0.0301389751693004
QZiV67oe63s4Nu7B7o	DGKQ	0.276909818481616	0.0181541749491382	15.2532306897682	7.21590796164639e-14	0.0470231793256513
HpZqJZGaYzoIoqQgqQ	CCM2	0.162425169935744	0.0245023591858504	6.62896044841024	7.21517224277523e-08	0.0446974246883926
u6HuURFS41NSAQoeSU	DYNLL1	0.0922516273658985	0.0089665507146883	10.2884186239843	7.21369941035817e-11	0.0161257426129817
uqUR_J4tFIVz59BLn4	GGA3	0.0828078553982323	0.021282949304895	3.89080734121688	7.21335329563825e-05	0.033023704349283
WJJIh4quSLuJ6gK.uk	LPAR2	0.375603428515695	0.015148843583411	24.7941980816942	7.20748043806371e-18	0.0501302504647091
ZSVvWSocin9p._oSQc	ISG20	0.536364777048313	0.0122086852949872	43.9330496354542	7.20747590678629e-23	0.0354747362661933
N10rh6ofoFcoXgQUIc	GMFG	0.220385587216157	0.0112842718976799	19.5303329461131	7.20687884362862e-16	0.0282572991553898
iyiJe56uUI6ISacX5w	SKIV2L	0.0794322892332386	0.0168191352225972	4.72273325482979	7.20585149199031e-06	0.0222540379752062
rJ9G667ku4pJ1_n9es	SETD3	0.0435419166786339	0.00921910914557859	4.72300696206816	7.20062125760207e-06	0.0143648387839207
uk7WTU553pd3ioPr10	TTC39C	0.954844041729265	0.0243150566781229	39.2696613612408	7.19803954143019e-22	0.0744691162133983
9kJvkoOp_klOJfPotM	PLA2G16	1.79467465330105	0.0292983447383669	61.2551551743769	7.19200791067395e-26	0.0954490377097772
T1EHlCo4BLog103Ugk	SCAI	0.0936699087628824	0.0240681906763371	3.89185502236257	7.1915646120959e-05	0.0456188803625645
EWeVNwX2wIXt179SWU	GNG7	0.8184174393566	0.033004679541231	24.7970121429052	7.19148102769736e-18	0.0793433945212639
ZiEgj4Jf5SU9.V._fU	DLEU1	0.218544999810736	0.0212372502190786	10.2906448601526	7.18758825985398e-11	0.0380531030269618
Erh4pNPIKVIY.Uc9Ek	GNG2	0.365882995292974	0.0166093612427396	22.0287216314783	7.18626277842175e-17	0.0487347111272404
ln4VehP5Hh.NSFAieU	RAB34	1.4633644537873	0.029790356729873	49.1220856150366	7.18007739440692e-24	0.124314172515836
Z.dGjoPctJ5KaglKas	RER1	0.103818137778099	0.0184302213089607	5.63303804320696	7.17668038328697e-07	0.0314354835373931
rVX_Dit9Tv4qAt_Rz4	G3BP2	0.0623214124521039	0.0160100278365844	3.8926486005036	7.17510585408706e-05	0.0213846115443333
r6P_SKuIH3e5edIplc	GMEB2	0.0528098940076452	0.0111781160998304	4.72440020626074	7.17405899315343e-06	0.0190787934769928
fLW.IiQFM_5d9N_FSk	ASXL2	0.134992777752671	0.0285733003478893	4.72443771314795	7.17334533094842e-06	0.0328313236852441
HN7LfolkSr66xXYkRQ	SCARNA13	1.23916802044521	0.0499657520978989	24.8003476064421	7.17256523872182e-18	0.123378601020688
36U54eVFuSkIBN7Un4	SCNM1	0.0906445450718928	0.0232845235860104	3.89290958593429	7.16970155362826e-05	0.0273061250317948
T1Rek_Tbqigfay87hE	DYNLL1	0.113789730178678	0.0171578938610687	6.63191712806121	7.16841603011795e-08	0.0206537564164229
QeHnXQCcGvkXULp6t4	GFI1	1.27862966679976	0.0364548736276512	35.0743135159275	7.1653774218046e-21	0.0986395704122653
9qIANVn5wOMcBb7_p0	FNIP2	1.52423218518687	0.0487166924059865	31.2876779992471	7.16301831962312e-20	0.129143652147527
uSf_dJ.Ouq7Hv83qa4	SLC9A2	0.705925356901412	0.0599167533237275	11.7817691670864	7.15926787929689e-12	0.114137658442721
Wc8GcY5eBcULedeVQI	HIST1H2BD	0.476568974094777	0.0845865115957652	5.63410128995835	7.15823970543427e-07	0.0535065329408395
33_7VUeyKGuJZJ5NBc	CDCA4	0.213375741826217	0.0158862670857108	13.431458798659	7.15730613460702e-13	0.0345323724504061
WSemIeyVXVHVEdHfkg	CENPM	0.227986747039735	0.0294817292556932	7.73315381409346	7.15695114678893e-09	0.0320418235459018
x_6A1qKDuld5U_6_bU	MRPS5	0.0710505401409395	0.0126105262066166	5.63422485127227	7.15609989099523e-07	0.021013407671534
NV.Pl0.fuGX76oqA3s	RNF149	0.411858862628325	0.0269888438382103	15.2603373859692	7.15480757598273e-14	0.0411606470774304
BpCIi6vQCHXqdF7yZ4	ELK1	0.233342046645631	0.0134971317345671	17.2882691844835	7.154611547851e-15	0.0336228191798843
TJ51wIIpIpTgwXglVE	C2orf49	0.300922294951986	0.0174056228477923	17.288797854778	7.1505330765732e-15	0.0425413780904528
9oNerotQRDRGiFFN4k	C15orf27	0.628427443937631	0.070221357583361	8.94923518377744	7.15019883722882e-10	0.109499329709028
TrU1SkesflV_97NVf4	PBXIP1	0.175535533161132	0.0371426944781158	4.72597735914276	7.14411326734955e-06	0.0602331000045596
ZF65k4uq38Iv_undU4	TSC22D2	0.127877482067826	0.0270577132993553	4.72610085904313	7.1417738371179e-06	0.037359089990318
KV7kDSLO4uggquLXB4	FCRL3	0.641355065382434	0.0477438193090214	13.4332584754326	7.14024108288857e-13	0.102242987461126
0leJ4Hq_7wRPrInOPU	EPB41L5	0.544446456716619	0.040529596735801	13.4333055486756	7.13979529179758e-13	0.0943865136405791
9gjnHf10XnvtOXFOpY	ALDH6A1	0.184616345327399	0.020627372132534	8.95006616166184	7.13949947740697e-10	0.034758224771265
lsSNUnzpfhUltdEjlo	SPSB1	0.521535518300415	0.0442590692613834	11.7836982793369	7.13899317781624e-12	0.0970151146419083
od9VeHVU_7wgVJBUok	CD1C	0.760960182131635	0.09838462651933	7.73454358727607	7.13716418207392e-09	0.116156524570331
iFKdoH18iU4J6iCCX0	THYN1	0.12201430452382	0.0136323971220172	8.95031911348584	7.13624588335896e-10	0.0266992582996523
Qu7V3q1dQB3rS9CjlU	CCL25	1.7550701407584	0.0319740569519465	54.8904426922138	7.13535696749721e-25	0.137673150814016
uqc7KSvDXUfdO6_BS4	TERF2	0.0869431587448463	0.0223229868029599	3.89478162184453	7.13106000891353e-05	0.0276047805944885
oGJDIOzrRerulLlZ7k	JADE2	0.323696588935703	0.0274679331805299	11.7845265899055	7.13030616171245e-12	0.0462270828198795
xk1dd53U0wec8lA9KU	FMO4	0.37548969029253	0.021714829469321	17.2918553573275	7.12699332743839e-15	0.0647109906029325
unEgEK22npomn6ACF8	SBDSP1	0.0813147010474062	0.0172011591208006	4.7272803231659	7.11947156346582e-06	0.0297117956670899
Q0s0Qd54iR5Je674p0	SUPT3H	0.533248089609303	0.0452444934531661	11.7859224164214	7.11569221942314e-12	0.0954390467507629
BlcG0.J__3jl1LKEXU	LMO3	3.45168324395069	0.0293875840176382	117.453794156029	7.11501662521037e-32	0.175035382432034
BTvcUX6UfSQvT14qdU	GBA	0.171123563923911	0.0257889820202429	6.6355300022928	7.1117112921303e-08	0.0433190774792546
xKhVKRCJ5RV3la.6AA	P2RY11	0.611352577027606	0.0277370890621746	22.0409782604519	7.10950734541495e-17	0.0539888594255192
9Jf90CV.S8QUVRzoNI	ANAPC13	0.122680749805581	0.0104085486715334	11.7865375545683	7.10926181753004e-12	0.0205934436379171
N66ifui2jRsXuSAWXc	C7orf50	0.0800146742395894	0.00893769423370077	8.95249626440378	7.10830617440205e-10	0.0157397978136443
rud35wIWSIUxe_0CKs	ZNF627	0.293953294805976	0.0285460046246522	10.2975284517442	7.10747433433226e-11	0.0419088852493084
ZlKEldUlODXx0nF2r4	P2RX1	0.650510498144337	0.0376137506476137	17.294486376503	7.10680190801781e-15	0.0959282978262578
NG_Lp56Od7GoK14aOI	PYCARD	0.563761520035766	0.0180114087041916	31.30024582167	7.10556761016369e-20	0.0490477890615821
iQlU4nn.OeAOtP1e9E	DCUN1D1	0.111375856994622	0.0285868324268682	3.89605449570349	7.10490915937351e-05	0.0343481542287823
BgSfotO.E3L3Hha9U0	LOC100240735	0.235999059122512	0.0229172084605098	10.297897299716	7.10320794709119e-11	0.0559028783488234
07aNe4sp6l1XqSr3UI	CHKA	0.125208106340131	0.0188675293929298	6.63616861182947	7.10173691772421e-08	0.0384087341412591
T4Ue8_8f4f9IkRX13o	CD44	0.770676407509196	0.0196122672935859	39.2956304323489	7.10148952470264e-22	0.0439829218262297
TkrTkRL.jAqSwQs_qU	RHOB	0.3673690557083	0.0651635311781712	5.63764806888431	7.09708115268135e-07	0.073273041072828
x3lXV5Wb9Kl2tTIgRQ	MLST8	0.0696340993247746	0.0178709971498016	3.8964865105777	7.09605610041354e-05	0.0264724429193611
uqdk1AIMwR1CTgIukk	FAM26F	0.580552808704167	0.06484114395151	8.95346339260023	7.09593152030973e-10	0.0874545460838999
oIylIm6GK6IJ00JlGI	SPTBN1	0.272984770070391	0.0411329770721794	6.63664022157604	7.09438025600316e-08	0.0585728139561718
uWodEa5.ogivvRBKzU	MRPS18C	0.0839657345194636	0.0148933033273666	5.63781806318119	7.09416356616787e-07	0.0182320954275578
3iVJ0fJSdH_Kk1zARU	SNAP47	0.0698420872318447	0.0147698559541703	4.7286911564039	7.09288935193676e-06	0.0255771473672564
HaFSBPdSy5PS9BEkLk	SEPHS1	0.276427516966405	0.0490302684195714	5.63789524056661	7.09283939441614e-07	0.0527423817411237
6ZmPadI6XF0RH2KKOw	C1orf228	1.20996363268973	0.0792487629914004	15.2679182237964	7.09022628504675e-14	0.116448308936305
EheiMqyXn_XuuoJ0sE	BIRC2	0.130243523698781	0.0275423286809464	4.72884937245275	7.08991475965e-06	0.0341450325465588
N20dE5GEtfvVUoKl64	MPPE1	0.406048522436936	0.0184193282394269	22.0446976762042	7.08638486907766e-17	0.04610514022824
352KZNKVv.xS.M0a30	RHBDF2	0.297861946959854	0.0195082020176322	15.2685494383663	7.08487649923127e-14	0.0365995350750908
3iMk6Ve0GfXu9RXuHo	SGCE	0.482017388499235	0.0137350207896239	35.0940414202631	7.08425104918391e-21	0.0438972734349584
TnebutbOgJesleYvCw	STAU1	0.0353014437595234	0.00531861434323836	6.63733850234934	7.0835023264769e-08	0.0113496490341679
3l_kqRDhftgNRe0oZc	CST3	1.0718563892298	0.0342386057390737	31.3054917422231	7.08172985292925e-20	0.0674806325840844
NIuXXu9Suf7kzP93jU	C1orf52	0.0661958072921211	0.0139969630062028	4.72929786717206	7.08148972879014e-06	0.0210115776009401
HYkdPedXO8.QqXUKkk	ZDHHC16	0.160803908879193	0.0179575599705916	8.95466361479707	7.08060563057757e-10	0.0370123753177634
KUV_oun66J6oQr.vxw	SPTLC2	0.188854483036148	0.0284521646169207	6.63761388909703	7.07921708903446e-08	0.0540229896121733
0jOJ3JZUJyQ6QV96tU	UBA52	0.38395950343077	0.0285689796667579	13.4397345620829	7.07918385397426e-13	0.0547200443531369
QdI4Ir2EqHQJc9S_lw	GLRX3	0.0518557312511728	0.00919619884484116	5.63882231409803	7.07695321279885e-07	0.0151297115770301
xz1S1tKD.sgqfTuesU	PNPO	0.192410671172249	0.0163198457802584	11.7899809693669	7.07337768942846e-12	0.0268532511823842
0VYLNK7XdM9eVXtLoE	SPG21	0.0827862016615773	0.0175031650738139	4.72978465965747	7.07235703659516e-06	0.0247011306055318
oIvgZd1ylHEB4VdJKk	PLXNB1	0.821814316171376	0.0372755497931951	22.0470072401562	7.07206658176766e-17	0.107091432643023
l.eugFC9FenqJN3jik	RAD51D	0.108487631054326	0.0278316311535748	3.89799758611674	7.0651800823002e-05	0.0411718085491894
unWn11HnghXnsieCeA	ESPNL	1.98315598269554	0.0323472829222484	61.3082708511362	7.06245157232922e-26	0.127368038407192
frS7Up6BAmUuB3h7OI	ABCB1	1.11023468376444	0.0727011371820219	15.271214822744	7.06233281014348e-14	0.12945386977502
BlKQle71_oev_e6_jE	PSMD9	0.173473607385664	0.0445015568531477	3.89814693355822	7.06213600273331e-05	0.0587043433610726
9x7QFJOvD7iTXeSTlU	DGKE	0.14504989179776	0.0257192810979409	5.63973352308719	7.06137497153719e-07	0.0452375590010169
Kv6jfd1RUR83VUqUdQ	CES4A	0.474262500767213	0.0402218285941743	11.7911720412409	7.06100950692834e-12	0.0861251836600289
Hvvqsg1IH9Jeeki3t0	PKHD1L1	0.885454537528779	0.0317411596466526	27.8960991780324	7.06073317983052e-19	0.0831300447988928
rNM1ieFr6KuEjSCnes	DCAF6	0.0676287691318739	0.00442829224641182	15.2719751472303	7.05591577323338e-14	0.0161403165607451
BU6gOUeyttjF3p4KPk	TMPO	0.133021066011171	0.0341214370056586	3.89846025503298	7.05575412565845e-05	0.0355316811902468
lLq5yrfh.N1nkQku74	TEAD2	0.376378686700469	0.031918893656722	11.7917209395886	7.0553173100005e-12	0.079666920643462
0e.hddVd584KrJOPe4	PLEKHA2	0.140044489442596	0.0210931505869647	6.63933483360906	7.05249895149611e-08	0.0257145012578792
03kIj3koHq7kRrvslI	EFR3A	0.203437157995522	0.00922609958270208	22.0501801624756	7.05244513869902e-17	0.0271233782307072
lKG415_qH0OeHmfR4U	DNASE1L1	0.114020826960219	0.0292437012385965	3.89898754709377	7.04502746421893e-05	0.0453778912929617
WF.WLknoqN4mSghkgQ	PACSIN2	0.330967152127136	0.0191277974958317	17.3029410312014	7.04232148169533e-15	0.0526424182438726
TUCU6iq7XXSFOVUjj8	BTBD2	0.173508056832951	0.0168401718533002	10.3032236454849	7.04189648214595e-11	0.0246201198056154
Hp4rv_K5Ngu9QnuHxc	RBPJ	0.199039903625635	0.0420674345660143	4.73144858199735	7.04123252573778e-06	0.0399641430813233
ln0vn7fesf3vOp.6ok	TP63	4.56339539669506	0.0432384947576253	105.540107773763	7.0370413240348e-31	0.152960888436659
BYQNrCnz069PlKJIzk	ZNF318	0.393571175271122	0.033371547858602	11.7936146365975	7.03571602000095e-12	0.0465556437945795
ZuVU025DF0uSQdfj34	RPL22L1	5.04638799483309	0.0478144607923287	105.541041584698	7.0357093302609e-31	0.21619897126127
c6fIAuMUlQgSo3K4lQ	UPF2	0.0613416961705526	0.015730335492964	3.89957964965147	7.03300247679602e-05	0.0214059283656133
9hUoCu4noJHgXF0114	QARS	0.0396858092729195	0.010176481611742	3.8997573805006	7.02939709363613e-05	0.0118192867088281
0onmoDvgmUoiH.mQYs	POLR2M	0.106491653166117	0.0273070632906181	3.8997841705924	7.02885380548567e-05	0.0417685978683594
0lOwqJTfoJI11JdS0I	CD96	5.81123815751904	0.0683285736704424	85.0484335520803	7.02696096249838e-29	0.242617326570179
0f9f0q.7XVAUi0znnI	ZC3H12C	0.804295243023802	0.025681281297619	31.3183455958785	7.02367390544675e-20	0.0632242388821378
NqwsZB8f9RQIHtJJ5c	MTHFD2	0.266815850032801	0.0401753702340921	6.64127918369214	7.02243879398073e-08	0.034401125366973
H1UmTF7133T3dVll78	HUWE1	0.119419505447339	0.0306191661141494	3.90015537987347	7.02133035800764e-05	0.0376267352174264
67fqDv0ecVk1Jh5JFI	LAMP5	6.31056548199193	0.0389583830697832	161.98222268846	7.01705681433679e-35	0.165605904748819
xoT3o8_9ST5EtUcBfs	EXOC1	0.07730878076607	0.0163347928062255	4.73276776039708	7.0166577473938e-06	0.0268494933092762
lemCiUjtjlPUkuoJ.g	DNAJC12	3.31342799726978	0.10579105607767	31.3204926779172	7.01402495179814e-20	0.237717312663415
KeRf6rTn_yS7dX5hdk	ANKMY1	0.243379754546424	0.0314310204808877	7.7432978892434	7.01382922513733e-09	0.0468268777794234
igooh6hKIBZcAuzSrc	PSMD6	0.0672092178672117	0.0142000895292966	4.73301367069202	7.01208658062348e-06	0.0176256169301298
NZYJ6FaKI4BoI5mKO4	TOMM5	0.281984035036118	0.0273614302197666	10.3058952975494	7.01135150709995e-11	0.0338509597359566
EdRTqDUN75LdfQk97Y	PTTG1	0.148863403049034	0.0110702813204891	13.4471201534431	7.01021694624166e-13	0.0206852012449571
roa1X1.Td6Xv496SSU	MCTP2	1.1455400336574	0.0971091993742336	11.7964110613536	7.00687472757425e-12	0.138759722130725
6Jehe6mLVPp6nel40c	CECR5	0.161506169990396	0.0341209333077584	4.73334561319497	7.0059210870239e-06	0.0491145312898378
3P_h5RE_sX8vd4KVG8	PAICS	0.043359178687721	0.011114456157585	3.90115162388138	7.0011802409045e-05	0.0128431949139457
irXnd2eLE1lEGE5U3E	UBR4	0.197922910203058	0.0297956923426783	6.64266860882974	7.00103975494232e-08	0.0351808691623973
0CeiiuOSiealeKmetA	CORO1B	0.531215839908436	0.0515387205468028	10.3071212143506	6.9973819495938e-11	0.097205403662799
01YintXoV6ek6AxLqA	NT5C	0.0527092033352897	0.0135104538938722	3.90136436194763	6.99688514060653e-05	0.0163671175628991
cgblN7AkdIKSU1cjvo	RASGRP3	0.269122717906386	0.00766383602543329	35.1159285002018	6.99536805091871e-21	0.0292120680241883
HRPf.670yffdMSuUhE	CCP110	0.163774776472217	0.0182755135022378	8.96143227122797	6.99481969135972e-10	0.0294200310564055
il313gyFIZX9Hy9LlI	ATP2B4	1.09216353251446	0.0714772093632381	15.2798849065892	6.98951871065573e-14	0.15302568339291
rpPv4ntU3Ue81f6v.w	TIA1	0.0817442990321121	0.0105543565871279	7.74507648640633	6.98904437496507e-09	0.0202171649663585
iIEIPQC4rLTUr1V1RA	DNAJC24	0.0667271920492269	0.0171014460424207	3.9018450184685	6.98719090492548e-05	0.0269279775724505
WpAEZVTeeX.c_V5BtU	RING1	0.0910307614154335	0.00676827291113404	13.449629264459	6.98694683510078e-13	0.0180070308327859
0Z8tVNWr_niXp6InnM	FGFR4	0.859816730296383	0.0496707274994714	17.3103309249	6.98646232767153e-15	0.12655898994817
9VP14hRSIiqIJeo_Eg	LCK	0.525138770137031	0.0509435891549181	10.3082405234562	6.98465258995809e-11	0.0688245622046273
uo6C3k3ivnS7VrT0.E	ASAP1	0.629642693579558	0.0285403929614828	22.0614584539639	6.98315921004103e-17	0.0574458795082628
0itKL0AUl6UE6YDXt4	AOC4P	0.889378188533604	0.187845466111973	4.7346268554784	6.98217607800684e-06	0.0689277394633641
K8VQgl6r1OXpI6UgIE	MREG	0.17458228943416	0.0447403574426069	3.90212102480661	6.98163048772362e-05	0.0498234804593373
Nlb98V1OfntedEXF54	CAPN11	0.438200184799307	0.0425083929378234	10.308556840534	6.9810596533779e-11	0.0915423081236813
TJo86PHOIUElLnUJWg	CCL14	0.259115898788756	0.0459058594167836	5.64450599728933	6.98036468268484e-07	0.0723092476560063
BQSpeUADaKvXXTdTdE	NCKAP5	1.83129870131922	0.0333275890520365	54.9484302167763	6.97992856083446e-25	0.154889217569288
Kr544ac67tsTX7qIgU	CPT1A	0.462272776766357	0.0391787043475139	11.7990828044239	6.97943470112817e-12	0.0844045152470757
9udTlEPOu6odIK4UKU	ZNF484	0.0714370946047634	0.018306576615412	3.90226398444272	6.97875222636547e-05	0.0360394681271298
ZnfAAeVPYool_SKuAk	CFAP69	0.454949208273726	0.0385574569974782	11.7992534700481	6.97768570537702e-12	0.0945742406770724
o5yE66E.iSXhe6oqrc	MCM3AP	0.0851709587144673	0.00950264731287587	8.96286644239259	6.97678270798729e-10	0.0210155422209685
KrjfI.jgkSzkrKXDqo	GNPNAT1	0.0903621374450333	0.0160073700370132	5.6450333337764	6.97147296092696e-07	0.0295040284611283
ouF0SwE3eX_Xu7veqg	MAP3K7CL	2.19475729906158	0.0167708939614125	130.867042872695	6.97030387501228e-33	0.126114428348709
igG0si0R.uxKjt8uVI	PRPF38B	0.0557112490434214	0.0142749329318202	3.9027328050863	6.96932189216109e-05	0.0242550423244769
Hs5.f5fvXvdKuGHlFI	GRSF1	0.180326884457907	0.00921682974386974	19.5649577424217	6.96841601915616e-16	0.0277137006729197
6lWX99edJ1RohUS3dc	CCR10	0.814497722495534	0.036915076531706	22.0640941051814	6.96707040924423e-17	0.0831135622493495
9MLpPJDXUpFXYjhpic	SSBP3	0.0937304060830131	0.0197931208987247	4.73550414624367	6.96596564662376e-06	0.0376143409687552
EC1yOkA26V0ecK5In4	PSMC3IP	0.173867916832747	0.0367156281263506	4.73552886619317	6.96550944220821e-06	0.0475740988276648
BlxxEXKc.rMl7616rE	MCOLN3	0.216272133385574	0.0383094726454601	5.64539573246262	6.96536918541914e-07	0.0549844531594716
KeK0qLnp0SxJO5fDn0	RASSF1	0.124414112196607	0.0262717283357334	4.73566529794639	6.96299216482723e-06	0.0308508352554078
Zle_ESt.XCnkK.Keuk	CCND3	0.462073103719741	0.0147474508498505	31.3324050660881	6.96074198135396e-20	0.037934120085132
05KVyf6Big_oj1KLSo	ZW10	0.0676232160603173	0.0075436723578102	8.96423026515791	6.95967549955156e-10	0.0183363589845927
3.igy.oX7l17qKeKHk	RABL2B	0.127156478169355	0.0225215629859044	5.64598816915765	6.95540292378164e-07	0.0347411778032287
NwOS_7UvopSrFE7RKY	SPTY2D1	0.665333622328834	0.0435305632758146	15.2842869988427	6.95284922898381e-14	0.0682152341178617
oQkJ1QqOuV73cUJzXo	IL16	0.615193325042264	0.0457277007424349	13.4534060329731	6.95207220248594e-13	0.10204302249366
Wp7sk10uQBUnUg.0Xo	RWDD2A	0.264332582124271	0.0677149581999712	3.9036069599816	6.9517734505044e-05	0.0446217543791826
EOempOpeRxPl9KCuCQ	DNAJC4	0.0882312543000632	0.0156263378195963	5.64631683499228	6.9498803479645e-07	0.0267481733984287
fif7nggv.rqfy4e5.k	ELK4	0.113198634130665	0.0289976155996984	3.90372214368695	6.94946457775198e-05	0.0440171183623504
fV6qIhyAESCgkkSohU	HEXDC	0.317438636039164	0.035408384779588	8.96506965836406	6.94916828327402e-10	0.0543689261741252
6PfJ5qKSeWCXgHeXnc	APH1B	0.238547057193097	0.0121907297223362	19.5679063211469	6.94849370772243e-16	0.0404138296546098
NrQlflSJ3c96CJrUro	NEFH	2.24918002147481	0.0457133200001144	49.2018523587694	6.94258921334581e-24	0.164001635890463
olEtGUeT3NepBI6IX4	C9orf64	0.077982682912913	0.0138101802200708	5.64675345797283	6.94255082547178e-07	0.0289040658026568
Q1J7q_ku1ISoqVNFgM	PP7080	0.117852383396502	0.0301859471366621	3.9042135356212	6.93962347031488e-05	0.037440356352211
HtXusgB8d.OXrksw9U	KCTD6	0.116144486998826	0.0129537498382283	8.96609000862961	6.93641820617327e-10	0.0278991895222321
xinjtCRRFUFUm3bi1g	PDGFRL	0.701900896862826	0.0594661695483023	11.8033648744215	6.93568975301639e-12	0.110494648232722
QqQF0qheQ0ghuCkj.Q	MS4A14	0.50946110983215	0.0766414007526525	6.64733557619011	6.92965830415513e-08	0.110208873885857
fkXmSMiEN8Vkr.SNyg	CASP6	0.186451688017334	0.0207926823730434	8.96717819626097	6.92284735225327e-10	0.0507100277080805
fIouv7hCaDUDpPYunU	KYNU	0.376521863713138	0.0279803111945139	13.4566717680739	6.92206306773526e-13	0.0357381545730931
60koQJSXRyBXEkSj5E	LRRK2	0.200881010179132	0.0514397355679492	3.90517190574936	6.9204716536424e-05	0.0726063531903239
KLWoEj1H3oEAr3T6pU	MMAA	0.409710629591927	0.020933325154405	19.5721714811138	6.91978107785869e-16	0.0629804020408334
3tEko.VQVJ1NNEhEiI	RASSF4	0.965576664759183	0.0437457894595619	22.072448038725	6.91633103198688e-17	0.0982406379753883
9eFK8yO6dWJ95s3kl0	IPO4	0.177616842162036	0.0454783957659917	3.90552127379251	6.91350358412118e-05	0.0433574915858712
Tme.WXfl9oZaP_G53Y	RPS7	0.285723731301334	0.0242024649837435	11.8055632553647	6.91334279316623e-12	0.0356978569857345
3_J5a9mL2KUr1l7bq8	ARRDC2	0.11240334003874	0.0237216313895551	4.73843211678233	6.91214546747013e-06	0.0390545278756216
ElAfU_tKw9KKuqKFpw	IFT81	0.155038324124003	0.0327192999919058	4.73843646295479	6.91206590058124e-06	0.0575670925560386
Kn3clQEmE5wLVffSLQ	DEPTOR	0.837606933764263	0.0622392169549313	13.4578642654003	6.91113886111857e-13	0.125431397649487
od4ToRJShCedIXH1_o	WASH3P	0.367136472007104	0.0211967626617336	17.3204030193673	6.91107337220001e-15	0.0472695421509081
cpUlE5QdO1DHn_Xruo	DCTN2	0.0586526430059086	0.00568619016587509	10.3149281495903	6.90909962171368e-11	0.0145619144446432
iS9.5fvd5eO7OSKSV0	LMO7	0.317273227808165	0.0477180277167654	6.64891746346619	6.9056357611464e-08	0.0802521643632086
NqP5df4dRAKwgro6d4	SNRNP27	0.0698356786353611	0.00900964670591966	7.75121166399084	6.90424918953401e-09	0.0190300933169759
9zfCohmRAJp5QFv200	TOX2	1.36118807947528	0.0487397921362141	27.9276545880857	6.90418556573943e-19	0.0889561684072144
xh7XpNgd1d7uw_iiFE	NUP37	0.132614712247701	0.0128556251738897	10.3156953048885	6.9004874689143e-11	0.021635235968771
HT64TpQ8LNLiXXN6h8	RBM47	0.256238655481038	0.0330566210563362	7.75150778551588	6.90018370126246e-09	0.0367178021776122
iVKmfE0AgaKYksYSQY	GNL2	0.0402439161066751	0.00712348207434195	5.64947250329014	6.89708733725103e-07	0.0126839170300427
lv1.83dCUUnlJRRiUk	CYBB	0.738607344762376	0.0264452450929481	27.9296842274052	6.89424145279943e-19	0.0712781729754285
fnXu8QqIHT_I0t76T4	ZNF217	0.436569625632885	0.0369740865436017	11.8074485793736	6.89423802531851e-12	0.0496632967909189
Hu1Ssk_HVtPouA6NAs	CALD1	0.47847769028129	0.0405231117475969	11.8075258697196	6.8934559880129e-12	0.0994647517891883
r8ldIFhlIH2K6X3TeY	SMTN	0.0965091165709883	0.0247045325185932	3.90653482304728	6.89332961580657e-05	0.0448201215254934
9qiKALo6C7egKkYiLc	NCF2	1.15723609249051	0.0524195078063457	22.0764394958782	6.89222457314677e-17	0.0785930265893674
fSqi4B_noSNNdHS9Xo	ZSWIM8	0.236050267420384	0.0304496311013642	7.75215524400258	6.89130336254192e-09	0.0389619090259963
NUWZ_p74U1U081FU_E	MTFP1	0.13830563981738	0.0354027227149484	3.90663850718414	6.89126929494139e-05	0.0452904702042098
oop4pqiNEK0ojYhSXg	CCBE1	0.716829042569331	0.183489386083774	3.90665126669537	6.89101579308238e-05	0.0679450389105901
cXXV01fUF.ExNEg0FA	SECISBP2L	0.146878726383548	0.0259957936054321	5.65009588139119	6.88670795135793e-07	0.034273466608524
rSnv1Q7QvPKsh1KK6g	LDOC1L	1.406527689726	0.014828565236619	94.8525813038598	6.88534199198783e-30	0.128220016462227
EXeE6unOcflOH0eKe0	IDH3B	0.059582631828681	0.00895944380459845	6.65026011972976	6.88531428624005e-08	0.0156091615724
6uVd7N.4guaDK_fcUU	GID8	0.0784418245793726	0.00760308855249346	10.3170999571809	6.88474775984623e-11	0.0191505005641783
BolUoXOR.P3hVun2ng	TRIP10	0.42884452709199	0.0247542587704728	17.3240706202652	6.88383319664087e-15	0.0602091780562088
oTl3uX2dOe.fWHoOX0	PNKD	1.30107370411463	0.0189970651383396	68.4881424914851	6.88118261458126e-27	0.103793431841432
3nGLUT17_w1_vZWv94	JUND	0.038056885184861	0.00673520524809689	5.65044178803822	6.88095554306006e-07	0.0111681519122532
BddMriNCKUUvsfSRQ4	ASCL1	7.05943154142237	0.0435416615912299	162.130504060605	6.87971264853951e-35	0.205639702198943
ol6H8XmzkTnSD7ccp4	ARRDC3	0.47648679886831	0.0716447518677145	6.65068670693562	6.87887082627124e-08	0.0808070263340207
BnqsooK__SU3HnnsVw	SLC39A1	0.0730441193805993	0.0109829098813612	6.65070734164545	6.87855930514821e-08	0.019587469309693
N5Nhvdeq7uUJgFSq4M	PNMAL1	3.72394705355473	0.0756515152446332	49.2250160689136	6.87517383592159e-24	0.265987215945782
T.1KCViVKF76SL5Srw	SOX18	4.36925644807354	0.0794550669260464	54.9902808859286	6.86995474535099e-25	0.22548199074167
95BSfOKkOqkXAd_OAg	TCEAL8	0.0405160654614749	0.0103679682507028	3.90781149033016	6.86800512602797e-05	0.016219448995514
9r9NfQCqvWIiRbKn.c	PCF11	0.0820429387123887	0.0145175045199798	5.65131139442571	6.86651611856761e-07	0.0270791934151856
HoggJAr.qDmCqXT.p4	NUSAP1	0.113288304309807	0.0170319726581186	6.65150811264404	6.86648145846716e-08	0.0235047758192915
ESqKR7eKIcSSuBLcQo	GNL3	0.0474995858844171	0.00714113104986003	6.65154939081367	6.86585946863419e-08	0.0141129506116041
6hOi5K6Ee7ge._tLz4	TROVE2	0.0483629117627387	0.0102008939517307	4.74104642118482	6.86445588270192e-06	0.015062927113632
Wu5Oor8QCEh7Vzn7kk	ORC4	0.118506652821	0.0249958650899251	4.74105026550032	6.86438600771401e-06	0.0445934018115943
Nt9PX86l_enqn8Egdo	TMEM60	0.0478097247900203	0.006165713982506	7.75412627404886	6.86434264916828e-09	0.0150326600112336
Hpzvixsp7qCOCOv6K4	S1PR1	0.470524329206508	0.052443623467175	8.97200265921774	6.86301415193991e-10	0.0618999544402885
rMDue4oOgDOuSu3604	ZNF644	0.20543464260572	0.0525663099250015	3.90810469479068	6.86220260901784e-05	0.0476366013089808
KiQFSxdISgLap.hRxQ	DUSP16	0.315971337539918	0.0352168998157117	8.97215084784238	6.86118487774946e-10	0.052337687467205
6Sp1SJx7VCIyCugHlI	PSMG3-AS1	0.138980880293558	0.0293129988104291	4.74127131080531	6.86036948969737e-06	0.0541036542192638
WuDuXii3aBogFLVYFA	ADD3	1.12111846248276	0.035754974145851	31.3555942708703	6.85822883263489e-20	0.0861470677925145
WoxKHU0py76oFJWkl8	NIPAL3	0.151764881303951	0.0268514656765695	5.65201479621204	6.85485952259008e-07	0.0430967027321966
lklI6yJkjlRR4CLh.g	CASP1	1.02944737484097	0.0292853311815264	35.1523214287689	6.85014853824607e-21	0.0756456097080203
xUU5cfv5_cXl54VF4U	UBQLNL	0.363835968992721	0.0352546369283292	10.3202302077988	6.84980672236391e-11	0.0771414871849119
iqfROeih.vj1.Egjmc	FAM169A	0.325522391288659	0.057589414965835	5.65246914700863	6.84734108756055e-07	0.08947719282672
fW46g4S4grWXuZugR4	HERC2	0.103071808076978	0.0132903441213406	7.75539046513275	6.84710836546393e-09	0.0308997089827749
E6_UohJCQJSShOC_c8	PSAP	0.290545336574161	0.0131562561643296	22.0841957579022	6.84563132072429e-17	0.0281045210640947
oAseZhDNSpNFCWlNaY	HIST1H4K	0.287708389319966	0.0508979666917394	5.65264995873912	6.84435146761843e-07	0.0470304611914738
uJeSqJIfrlSeUgJEj8	CLK3	0.233306513840168	0.0350667703360465	6.65320791177461	6.84091697774507e-08	0.0343659164553572
TkSKF7dVpx35fOncu4	CACNB3	0.702338842446336	0.0405273247971698	17.3300074939904	6.83997613994365e-15	0.0923911387664051
cm2tusjKa05MYP9J34	USMG5	2.98349047475143	0.0253544958583751	117.67106281334	6.83840668849582e-32	0.132629845289651
KevBfguHvsU6_5E59I	RDX	0.108633934799332	0.0163274224628329	6.65346505528488	6.83705826228082e-08	0.0243727307369232
TuyPlWlXd4leyTe4yc	PRKRIP1	0.26194522018357	0.0337724990841966	7.75616928822847	6.83651341323706e-09	0.0470922876025632
3Una1dSkCiAah8fRKE	LANCL2	0.184016881863071	0.0276570332915885	6.6535293183104	6.83609428070655e-08	0.0508462356335104
36udlR_1Rzerk434kI	CD83	0.843568174076593	0.019151797098705	44.0464239323857	6.83501057477152e-23	0.0587614517752169
WUBFC7yeXwr81qk_uk	C18orf8	0.119199246353125	0.0179146565465952	6.65372769179767	6.83311946019633e-08	0.024727154181146
lvk.TqXqr9ckijPolU	VAV3	0.235052942887892	0.0415774557393077	5.65337485683789	6.8323793229004e-07	0.0720348761960742
3hZb3QoasCrdelAPVQ	TTI2	0.0412356073485752	0.0072938923007956	5.65344340827151	6.83124828192461e-07	0.0160076981338403
EdGElS4qU4brRMOE7o	WDR33	0.158601240452246	0.0334398256745967	4.74288478640996	6.83112556529089e-06	0.0387492703321553
TrlEv8BSCukd7p1_yw	GORASP2	0.0711590452020559	0.0182006493022999	3.90969816626618	6.83075638001462e-05	0.0198397808878852
oO3ZwwVSc_3vu9J4jk	GPR180	0.1180831790336	0.0177464626004597	6.65389952308248	6.83054375870372e-08	0.0295171334477995
6Ts3_oXtJbpLdX1yU4	SNORA24	0.73075733963423	0.0942104753872768	7.75664634564533	6.83003206816099e-09	0.0863016490456062
uaVBVeBDVIaXxx4u94	SUGP1	0.0494073239168001	0.0126357124618932	3.91013360471781	6.82218922379979e-05	0.0190941718211632
NIEjp7gDxFTkSBCUSg	CDK5R1	1.9900302253736	0.080035489361844	24.8643475693212	6.81951266833258e-18	0.139784641075112
BX5UdciEnudH.Xn_5c	KIF2A	0.0420003296774635	0.0107410032992532	3.91027993449956	6.81931271399144e-05	0.0162779112821003
HkxTQYkScIEi4iKVOk	LRRC16A	1.45528031768071	0.0520762691841773	27.9451723496905	6.81884948685478e-19	0.12665915860711
0ICkSh2cLvZxmqcWjY	DYNLRB1	0.0573879452740104	0.0120978649188508	4.74364242442392	6.81743823060658e-06	0.0195119173922484
0iS9nXV4wi_1QKtnwo	S100A10	2.29277568709888	0.0373344575988193	61.4117851057623	6.81692771642513e-26	0.144915322136039
reQlSyH_1SlPzuN9FU	CLEC2D	1.294723283595	0.0136434085736011	94.897347434144	6.81639719354092e-30	0.107797067184705
uxGdFpxSNhNFGiBSxY	MAD1L1	0.461209486803436	0.0513825556827507	8.97599351910526	6.81392734687243e-10	0.0682300036335378
imS5fkxUBSuom.74k4	CDC25B	0.2594783241357	0.0289080262633261	8.97599586260529	6.81389863018406e-10	0.0374767890390412
x7V.X3NFcT1JN8X0zk	BCL11A	6.80525031305422	0.0466786767984054	145.789272100504	6.81307728947334e-34	0.183047904572816
NeS4lCNmk_R9JepjIk	FKTN	0.204866804450782	0.0431847016831513	4.74396711024895	6.81158124476911e-06	0.0260571878005529
xxT4gidRSSF45c4ERE	BCAP29	0.153126070991406	0.0197373454869336	7.75818972681903	6.80910743233475e-09	0.0339818008173243
QlQR6ud31HEiDXggCo	SUV420H1	0.182683503869995	0.0203507666712487	8.97673816525487	6.80480898540917e-10	0.0436759081026582
9XwCj0QAf_UR_uXKV4	DACT1	1.61845252896204	0.0328620801387681	49.2498503481134	6.80365609498902e-24	0.131486026329567
lW4AaJ4EMp71TslV6U	TNF	0.506370077784617	0.0652653549011156	7.75863516795128	6.80308073738953e-09	0.0467252193687419
HiiPQRRISeSh2M1On0	DESI2	0.255646717510783	0.0216343086067899	11.8167269477957	6.80101675946002e-12	0.0380754063012842
WneUfnJ7iHuhAUdJd4	ADGRG5	2.13040402047351	0.0310888476350417	68.5263103181809	6.80084763410884e-27	0.097597506163433
6DgkeiKrdeAFeSAejg	CLIC4	0.334458147793606	0.0134492826770027	24.8681030673484	6.79936832153688e-18	0.0505910144753062
rR_heopIr9LiVI2YR4	PLA2G2D	0.393591058375742	0.0695930750249604	5.65560665676255	6.79565643466321e-07	0.0716217249461902
xf6KqUpABtVglJL7Ig	MARS	0.0856700496312152	0.0151467430461196	5.65600468499153	6.7891287443721e-07	0.021264913137112
HUgn802vPCifZCnHgk	MZT1	0.195960597497059	0.0412945513253213	4.74543471736182	6.78517230883406e-06	0.0463891626467057
EK2RR5HUt6sEiYh.cg	CDAN1	0.293895627555997	0.061931655056518	4.74548318283746	6.78430201037729e-06	0.0324173153521436
0u9eiDuPahktFxFiRk	HIST2H4B	0.141335991642074	0.0297825789105682	4.74559278652399	6.7823342757049e-06	0.0417441667764726
TZmQSU6f8KMWgARW6I	RPS20	0.0157607780800999	0.00278632400831512	5.65647714805085	6.7813887888063e-07	0.00627081891328638
oWPUzpO1BPSrtzJWPo	FBXO3	0.0982197134275559	0.0126566021060295	7.76035405116864	6.7798768421392e-09	0.0309291339473698
ieY4sKsKmToOqcK6i4	TMEM44	0.349092509738566	0.0259117144452208	13.4723817861057	6.77958213169886e-13	0.0568027726217271
BlpDqSl5Ax6RIk8NMQ	HMGCS1	0.387250842589363	0.0197644423043166	19.593309875725	6.77929854025891e-16	0.0368813988055572
ZWuWSDjpVDVutSNPzI	FNTA	0.101177355185394	0.0178863826227928	5.65666950769923	6.77824015790704e-07	0.0265763409356224
E6.xf9ai3UnpXT_7Wg	UGP2	0.185630293427017	0.0474452166078399	3.91251862039856	6.77546138862905e-05	0.0543481111050635
rVUch7idfipSh83e9k	ATPAF1	0.072752997262907	0.0153291143305774	4.74606658244987	6.77383494995268e-06	0.0254437709382323
xoB14Cd3p6C14x4N1I	PCM1	0.129185376773938	0.00958843379717696	13.4730425746875	6.7736567281864e-13	0.0225663911098868
BlOeInqf13uFNWl7BM	GAS6	1.2449115033969	0.0717966710193843	17.3394042609689	6.77115592512596e-15	0.15102021403866
TlKmqmq5P1NfsBX0yw	JDP2	0.286713057330655	0.0430613160933576	6.65825114841025	6.76565035926955e-08	0.0629784578543664
KShxEs6ueXeNNt5d.k	SLC44A1	1.06637307620064	0.0241978029102435	44.0690041222386	6.76326262894219e-23	0.0886733517560651
Zr9OhHviQ7EuzrufF4	CAMSAP2	0.425571380250988	0.0245419906729523	17.3405403792289	6.7628843714966e-15	0.0562487479432474
QfSUjhOIgzVIFd3UK4	RUNX1	0.574850941514665	0.0331501251168558	17.3408377642102	6.76072099270353e-15	0.0889626980278647
Kq05J6uOMgi6n8HpKU	SLC35A5	0.610316525545534	0.0311443025205169	19.5964101345174	6.75894670082193e-16	0.0546624295562639
WlysSDwyV8kGHnnruw	IRF2BPL	0.768846998115032	0.0245017423911633	31.3792784954069	6.75515514619796e-20	0.0583096172861594
iUeu3DGc__Wiur3uG4	ALPK2	1.95928368702575	0.0318899354607187	61.438935473518	6.75401895531905e-26	0.127499924769684
fkii3e6FOD5Ht1ddP0	MOSPD2	0.100731722541587	0.0257380191253276	3.91373252351273	6.75180559069213e-05	0.0365387000051788
32q0vCXSz3yf__P_kc	SENP7	0.128076224609088	0.0192330099610353	6.65918776460684	6.75176734948182e-08	0.0318397114578668
33obrCQopAnZlAmA1Y	HIST1H2AC	1.05946932008788	0.0692060540697074	15.3089109663837	6.75140535680026e-14	0.0741917310227311
xna_3uqS3Ci9eQN3jk	TRIM69	0.592079197618054	0.043936843792141	13.4756879765669	6.74998909607774e-13	0.0790181028577189
xUp5ItVCj8MKeuv9Og	SLC25A26	0.319015164615313	0.0162775760918174	19.5984440690576	6.74562950896257e-16	0.0560496518130391
rqEqc_MK1X675ffk3U	GLMP	0.115084321101321	0.0172808331369425	6.65965119790991	6.74490908531739e-08	0.0257370729362111
3e90qFN2nl17FSHcF4	TSEN54	0.162888306393413	0.0244583935791082	6.65981213633541	6.74252908618391e-08	0.0469274112034505
6Vye6yguldItCiko4M	LOC154761	0.673238884996185	0.118970141767823	5.65888949102916	6.74201237974234e-07	0.0972898272386337
rkkInovXorkooMTQI4	PSMC4	0.183666008106784	0.020448416504675	8.98191838300993	6.74172750490693e-10	0.0364381616214284
ZSi56ddu.rirouKVeQ	TAF1C	0.411931119687892	0.0398770474959054	10.3300305703473	6.74160388310906e-11	0.0725728718196023
BQUukrdQlQoQVHgYKg	SYNGR1	1.32944344461324	0.0534351234385905	24.8795803034138	6.7381894716778e-18	0.152761587139559
ZFcKnq6e3QoRPgxvuE	ABCA3	1.13627338872095	0.0456706454387098	24.8797313417835	6.73738821566008e-18	0.122129774945122
r3ovwUjXVRVZ1dMtxU	SIT1	1.36016581064981	0.0386616388605334	35.1812766022782	6.73686056128191e-21	0.104234307039064
ldedH5OLvhZxelPu6U	GPR15	0.476204508079583	0.0530154477254894	8.98237265759481	6.73622481982855e-10	0.0755363936958762
BRIrveF5B_HqCVerBE	CPEB3	0.794308680156176	0.0671792652522867	11.8237178863628	6.73164797271139e-12	0.0983805178586379
HIC4mKLSAdJR6_X6yk	RAB28	0.104388457911202	0.0184442784321096	5.65966612873683	6.72938611306305e-07	0.0332361113725805
Trqpb5K7Hqe0qN.3MU	SLC27A3	0.225894304201233	0.0251466766468711	8.98306791682315	6.72781213414616e-10	0.0390100375079663
919WLjFTgeUsinnNvU	PSME3	0.178786857355805	0.0456669045613254	3.91502027722756	6.72680404070492e-05	0.0377575229345292
6HlFLVSeSF9NV9N1Rw	NEDD4	0.192625039374343	0.0289171876655916	6.66126462925529	6.72108880327043e-08	0.0571734286573567
Nql4j95H8BCddcrijk	IFIT5	0.324386230165982	0.0187005770601989	17.3463219408552	6.72095477717572e-15	0.0609382197334009
KOMbAZ1.qBU9ipJaag	CAMKK2	0.759280165933446	0.0563291182931868	13.4793547092549	6.71732669820315e-13	0.0991892183708794
WrRKgtEgSwxnJKpOqQ	FAM86JP	0.216014156215189	0.0182672267605738	11.8252299074435	6.71674213333741e-12	0.0526525995238151
3tC_VJ_i_3tGRO7Xus	PITHD1	0.0499638925433299	0.0105202354114192	4.74931316547315	6.71589200997076e-06	0.0155475569024453
ZUSvL0tAkpBVfupHhU	LAPTM5	0.159608082922035	0.0118407867953333	13.4795166639551	6.71588785692196e-13	0.0220008544613447
QSTToCVwIJXdJEtSo0	FOCAD	0.107415448906774	0.0161242620694554	6.66172804957405	6.71426320763494e-08	0.0289417845769006
xL515VdXgc.7nuzNHk	SSBP2	0.19089378489274	0.028653821180222	6.66207078253502	6.70921983218125e-08	0.0316304532861085
uXRKlUK7WLu_reBmAw	CLCN7	0.113477832982091	0.0109820312108787	10.3330459368647	6.70867237947312e-11	0.0206574786131615
9uToKnR5MhFUwVSn8o	ZNF433	0.260270402666203	0.0220078275865424	11.8262650705859	6.7065571497465e-12	0.0534024726211188
BD6Qjs.8f1COW7uUIM	MBLAC2	0.211542747782272	0.0445357211724293	4.74995671369596	6.70446764175113e-06	0.0591980976631537
xqcezTVzOfpLz_Q2UU	TMEM251	0.135185706543839	0.0174072609310489	7.76605274542144	6.70353672242396e-09	0.0310481456779907
QInWgH5XgojqB1I5Ec	RPL31P57	1.41573669751908	0.105013994788105	13.4814097909114	6.69909275979023e-13	0.151255412197048
rr5wo6ngnqt6F9DQJc	PTTG1	0.176824386109021	0.0227670954510535	7.76666424090736	6.69539852755015e-09	0.0260769926535361
6SoXiLCROEm3n5vu3s	ZDHHC8	0.0700221328867067	0.0105090753147213	6.66301561171788	6.69533694193934e-08	0.0173651090731133
ipeYnqAoSOKoXbl9_c	SLC8B1	0.106963475472881	0.0225161009515388	4.75053277221918	6.69425848271052e-06	0.0340713217180618
iXftIjXcUSE8MniSiU	B4GALT5	0.156194683595825	0.00706450173950816	22.1097947675924	6.69417599572849e-17	0.0267959247751895
uuJRRF6UdkIX.N4AUk	SP140L	0.22194248502978	0.0566648791231345	3.9167556423705	6.69326362740343e-05	0.0708437530914554
WVSu6rJC7n1tCMUz3U	CADPS2	1.43270240730031	0.0407103811536071	35.1925569523529	6.69325754618467e-21	0.143401796127396
TIwluhWXRZ5IQJ5TWA	PHACTR1	1.45286223443518	0.058375547114113	24.8881990192762	6.69262625357084e-18	0.0830693979217472
KlB6fjr0PLCcP3VEVk	VASH2	1.95709780468519	0.0443871331026475	44.0915568968895	6.69238732613319e-23	0.10843495949394
BeVLiOihnIgLni7ViI	ITPK1	0.264822238103306	0.0196423374121189	13.4822161205681	6.6919526428889e-13	0.050075133376178
EJ5JEtOlSm2WVaViKs	PHF11	0.149351449361719	0.0381295320442394	3.9169494445522	6.68952865720541e-05	0.050580447424781
Wg6gpQMjjRS01Id0L0	IRAK1BP1	0.10964089285116	0.0279906617869659	3.91705254008017	6.68754267131853e-05	0.042523010393376
ZReJu4g9rquDlHUDu4	LINC00908	1.51174535458244	0.226865986988549	6.66360512939629	6.68669000983773e-08	0.135995341447443
opk7ew1Scew3ScdqKc	PCYOX1	0.309838600126969	0.065215259193749	4.75101385714752	6.68574486093736e-06	0.0740635117229981
xMzvqBOdn3Vu7ZZbm0	RAI1	0.180559173815008	0.0380027658207516	4.75121138989344	6.68225243831294e-06	0.046832578667115
HnlBCeqtFDlJctf9IU	LSAMP	1.50455848141255	0.027324095315713	55.0634326234157	6.68205751952851e-25	0.137469751886912
Zc4v_rqyKrn_Xv_rEo	NUFIP1	0.113992753779536	0.029098047180394	3.91753965731224	6.67816731244824e-05	0.0453234747153033
oiS4TT5f0dSo66B30E	PHOSPHO2	0.251532377911859	0.024335706664026	10.3359389305791	6.67723520960766e-11	0.0537012773025672
rvRNLp.s5Aznu_hehk	NETO2	0.610081991225854	0.0173329529925984	35.1978102915514	6.67305209604726e-21	0.0527508938116389
ontXUcSAXRIESQKMLk	CAST	0.299141211055842	0.0195273929639525	15.3190552168462	6.67019972959177e-14	0.0462462958984015
0.PRu.vXrqQjlN4p9I	ERICH1	0.0626659412875266	0.00940245031224519	6.66485216155986	6.66843711345344e-08	0.0178687334824723
il3dXoTG8kT6T0s_uk	ELMO2	0.0625610968705115	0.0110464725548486	5.66344564383602	6.66829067789097e-07	0.0206678632843298
NDrblACpZpRuSXPZ5E	RPS26	0.415928852036532	0.0462749913063414	8.98819946357361	6.6660582457153e-10	0.0375573741205087
l5cXJ5NzDtJ81wp7UY	MAPK6	0.0586273455231863	0.00879625520849275	6.66503462366369	6.66577076150396e-08	0.0157763295134246
iIteqJ97UXteSKLb9Q	CD151	0.376338220652948	0.0418701190840469	8.98822904939713	6.66570392547782e-10	0.0813383003553227
EUlcJSV53lwux1IIB0	PHYKPL	0.193763225913958	0.0187445602471081	10.3370376983825	6.66533562010228e-11	0.0402752780535948
Bd6V3FXjeE1UdGDPOU	CD22	0.617780671752484	0.0403256127034105	15.3198086857645	6.66420900639451e-14	0.0649240779337074
BdREVTRUjD8S97wS4o	ZFR	0.031092741383182	0.00654265817216433	4.75231023308932	6.6628592075307e-06	0.013081626810956
rpzl_RErvrjqnviOXs	ITGB5	2.86213216731038	0.0580557784571173	49.2996949377655	6.66245063648339e-24	0.186386812666864
ZLUKSIKKUIJQU0IJV0	TCF7	0.541201580898754	0.0353264007191793	15.320031757578	6.66243647328882e-14	0.107448336436648
rAlrkp3ntNtKHX7qe4	SERGEF	0.105255022405952	0.0221480602011941	4.75233593596052	6.66240628382701e-06	0.0297617573141721
QGSUg18Le7v3u3Qh6k	TUFT1	0.465694411298891	0.0698685478748627	6.66529397652529	6.6619827031208e-08	0.0897018083466886
rjkSKESCh_kkq44XjQ	TRAT1	0.420423869819334	0.0630761897894582	6.66533395917961	6.6613989237545e-08	0.102073136480525
9TNQvR3t9eJLoI0z54	TRAF5	0.471255716286133	0.030760001180129	15.3204063135916	6.65946135164683e-14	0.0526956645998477
TeSFNFLiBU_oWJeqJM	HERC2P8	0.0758810665359756	0.0193646071976171	3.91854406142114	6.65887884098568e-05	0.0317922317170195
TPWFKkVX0icqGBJbuc	TBC1D3B	0.202618032341128	0.0426325856361058	4.75265643211491	6.65676133868635e-06	0.055285385167269
QpILtVL4g3lUigRFRE	SAPCD2	0.555779849827251	0.0618282112095795	8.9890980016116	6.65530610449673e-10	0.0854444685372654
EpBIouKLnnsjhBdT3M	SAT1	0.48009385394777	0.024478665694002	19.6127460519797	6.65275822005346e-16	0.0368065279620592
99Vf5_kffXnlO4IKO4	CPSF2	0.0922768530531161	0.0118760023871717	7.77002648237863	6.65083531090874e-09	0.0268910503928103
KhNKQKSdPRG9SlTh0k	DMXL2	0.188262403191389	0.024229202864376	7.77006178227142	6.65036909022865e-09	0.0527485795524015
HbeRIp6zv5TSJGmAD4	PSMC2	0.059763268295363	0.00505095794636232	11.8320661011253	6.64977847331257e-12	0.0139763666261431
lsCU7xiXwoT4LbwrV4	SNORA33	0.260045913657191	0.066353715999543	3.91908591312327	6.64849712595538e-05	0.0583114648874266
Hf0uzdJqx1J_6T1TuE	ZBTB21	0.216165627105591	0.0278196868282769	7.77023941498411	6.64802353693104e-09	0.0431284211902377
WUSrkrBX63sJFFjUqM	TRPC1	0.292483127806122	0.0516322822127612	5.66473367574352	6.64760193764249e-07	0.0807440739334463
us8SV3ujfQd55dR7jk	LETMD1	0.265572347251482	0.0135402091274723	19.6136074968482	6.64720719054151e-16	0.0377430973681759
c7i4oKf4jr9JXJRR4U	LOC285074	0.439881512914952	0.025343588740514	17.3567176069173	6.64624432709255e-15	0.0506011145738456
QoyKLD7y6k6j_._or8	ALDH1B1	0.396338185378627	0.0833819713454331	4.7532839411614	6.64572331224406e-06	0.0590902623288719
oUuoJKG3qfxr3KhKII	SARS2	0.0838817064474593	0.0176454866868632	4.75372019689931	6.6380606790658e-06	0.0226505677796066
lvrv31_lf_hw7x7UL0	PTPRO	0.782603451346134	0.117385745514024	6.66693769264036	6.63802701504805e-08	0.128342977638809
EfeJJ1S5Sp.iH9UTjA	SLCO2B1	1.53103576889911	0.0347101086063201	44.1092186216997	6.63742515988776e-23	0.133031870085012
KSVT1KtU3taL7s7QtY	DHX33	0.105294460154103	0.0268629532153903	3.91969041191562	6.63693487537972e-05	0.0293921072850108
Hq_ffwEuJUU0frO9Cg	TPRG1	1.8821485527498	0.0534578455201055	35.2080884374946	6.63370437443803e-21	0.164822424394871
QjupcAJNtCi5qBZ57k	GIMAP7	5.06023790442951	0.102620089094754	49.3104025641329	6.6325186207899e-24	0.210562732354787
ujAVU3hSATlDXiDBdU	FAM213B	0.272092325436252	0.0408089087160991	6.66747369622536	6.63023467104423e-08	0.0614681588565138
Wb0B7Ud41BXseMsfVI	PPM1B	0.0289075361494731	0.00510203657613081	5.66588179408847	6.62921685241182e-07	0.0116410888343359
KXlOxSLUOKdYL0FPS0	HTR2B	1.6201713270493	0.0515827283016083	31.4091824995381	6.62732117093357e-20	0.152016683116666
QjdRaX_9.wB_DMrqIQ	SKAP2	0.496070207417562	0.0367742752332167	13.4895984834932	6.62694964951945e-13	0.0544821698467943
f3uDfp6h9d4uOXirSc	SUSD1	0.731388017613669	0.0185494356608617	39.4291250141295	6.62610062833171e-22	0.0653380007450992
KGQsQrgnrogmpvW4jU	GLTSCR2	0.0381165211255327	0.00972256865349036	3.92041676268844	6.62306947843682e-05	0.0109871715256922
x3PpTep9En4vBfn.Wo	ALOX5AP	1.25564471802974	0.0356606842373173	35.2108980768172	6.622990527594e-21	0.0650472396552048
oonHKO31JdeS0KLFHs	SKP1	0.111054598536974	0.0195986259114835	5.66644820093759	6.62016635266828e-07	0.0255592721818981
caS6XnqkOk3tGu.3Uk	NSFL1C	0.137147312019562	0.0242028601082183	5.66657458690151	6.61814861285069e-07	0.0403431777614736
rJdVC9Q6P5fdAOxBwk	C1GALT1C1	0.156840933385689	0.017441809574052	8.99223975125948	6.6178531975309e-10	0.0400668629463633
WuX49HyC7dIAXoS9n0	USP1	0.121746590543147	0.0182573322492969	6.66836692681843	6.61727018822028e-08	0.0246359307709412
0vm6uk4vggpAp_wPxU	NR4A2	0.768505443073669	0.16162258941255	4.75493831565845	6.61671352696959e-06	0.102261601945231
6kmUJpNRQk0L6IAqBU	TM9SF4	0.0522402485645425	0.0133240109355225	3.92075995864483	6.61652860058518e-05	0.0200984110407161
34kqEtP.wO._lqbrp0	LRRFIP1	0.318226072906545	0.0669245835372168	4.75499519140944	6.61571854128819e-06	0.0413952505210653
i8aiERU6AlF5U5ec2I	LRRC4C	0.504134247821171	0.075599237363895	6.66850970195022	6.61520037909871e-08	0.106407220735157
KlaUC3KSCXXMECrruk	TMED1	0.0933641263113775	0.0164757215999463	5.66677008621472	6.61502874591601e-07	0.0246581085184523
WYA7zwgBL1pak66dGU	SHROOM4	0.814710022328825	0.122171316181075	6.66858676648216	6.61408345607174e-08	0.0715811620242091
xrlPVJvy.cil0v3U0k	MTHFR	0.182223764498986	0.0321558700638193	5.66688956440393	6.61312281240401e-07	0.0525909494957658
WpwMtCqwzqXvvy7dfU	MPZL2	0.252208402629828	0.044502083274454	5.66733923610731	6.60595470644716e-07	0.0692529482504358
cJ6F9oVShtjgeN9OeI	PMS2CL	0.143814473235328	0.015991337437636	8.99327362681107	6.60557649681776e-10	0.0439390600738848
KRXrypIO8CFN_ki9SU	C2orf42	0.121469741269565	0.0182135225129204	6.6692064197574	6.60510974736068e-08	0.0293155549954557
NKXnnitHlH3ROefCok	ZDHHC16	0.134633803668387	0.0113740612206702	11.8369156852889	6.60269764300564e-12	0.0226899859430474
cpd7qTZTcRdTjhyYQc	TMEM8A	0.148245435415871	0.0190700789112752	7.77371903417879	6.60225048186422e-09	0.0387738130260736
3iviu9BNvCkdUAZAXU	CCDC50	0.479964149577721	0.0405460008464522	11.8375213228882	6.59684248407913e-12	0.068687708419853
cnkMUe54G3ekT036_Q	ZNF789	0.4546877739493	0.0336975786504248	13.4931882989631	6.59557941294613e-13	0.0596749193576436
9is.Auf4hePTlVQKus	N4BP2	0.631046087477057	0.0467670458449879	13.4933921113747	6.59380302306481e-13	0.0879300630006192
xXQSlSoqC7iZfrOHwA	IRF1	0.526676417978331	0.030331245633616	17.3641539269531	6.59333459955471e-15	0.0456821287417745
3NRFCKu_44rlruQKgc	GPD1L	0.306870445229288	0.0227419903463336	13.4935614937837	6.59232709881047e-13	0.0520739500280842
feqIx_OmYO1v93V9UU	URM1	0.102776036211892	0.0132196196628517	7.77450780227072	6.59192032655987e-09	0.0213114185680121
6ngbhUunjrngDdflbg	ATP2A2	0.172274041736143	0.0258276957704249	6.67012819368164	6.59178425412543e-08	0.0346934923674052
fKV4uJIooeyriKgIA4	SLC41A1	1.17340308928042	0.047110380840187	24.9075271384659	6.59161427352338e-18	0.141436571889725
lf1UL5z7CLPeebujks	C6orf62	0.0516190146276472	0.0131598050899191	3.92247561988506	6.5839303740667e-05	0.0157831830764497
B3iXW2Vde_rCrvi7h8	ATP6V0E2	0.215757392134744	0.0124244716576771	17.3655184767093	6.58367366425851e-15	0.0300263789857699
xlG8TQRok6KS0p2PX8	SEC23B	0.191022724102545	0.0336974080311861	5.66876609399032	6.58326301665586e-07	0.0294539578904681
o6jIqtI5I3cewDqdXo	PGAP2	0.0341406698103353	0.00870366989706678	3.92256027791691	6.58232614802683e-05	0.0146660356630002
K_aW49rVntcpqOuWe4	MOCS2	0.0959666981791862	0.0169286151390314	5.66890424237485	6.58107031962731e-07	0.0338241568768903
Ki3QtbOwNI3Vd0VdUU	SPI1	0.196096701922957	0.0189559157987143	10.3448814610295	6.58102884713265e-11	0.0411173314381032
ri7UigEgKDi7uG_eRk	GLOD4	0.105295440052004	0.0135419892919876	7.77547801742126	6.57923695890113e-09	0.0233796245083231
EEbT6Knmz_wMl450.o	CHSY1	0.214715071232299	0.0123639161733736	17.3662671455748	6.57837941689793e-15	0.0290094339731396
c5dMl5617CQkcJ1EuU	APOBEC3H	0.908014648941205	0.116775556019941	7.77572533061753	6.57600797215732e-09	0.0862988335871527
BJ6KoI6iJjE0ZOIuGE	PRKD2	0.109166820971355	0.0278278240026188	3.9229377389005	6.57517837795825e-05	0.0346893730753898
uGrsBHjrM0s3iFUB3U	CLDN11	0.188571101795328	0.0480684008212043	3.92297431522091	6.57448617939738e-05	0.0691548577313372
NKNXgi36IAr3uV0rqk	DGKD	1.28463461151674	0.0291102316797573	44.1300030054399	6.5733493270299e-23	0.0822261807893204
xiiK0qcKWqOIeSiIiQ	TMEM80	0.150701946793552	0.0167517912959948	8.99616907414451	6.57132101228598e-10	0.042997121738246
iFJ9Ac7AKH0ULypdeo	MCM8	0.113305618814816	0.0145708493468579	7.77618490985558	6.57001197347181e-09	0.0327987287325561
QWoV50Skp.11Be6Z5I	ACP5	0.58975069687783	0.0236734087821342	24.9119466615599	6.56874175952942e-18	0.0695759276801033
fIU.eS.lQF3Hv6hLCU	SLC38A9	0.129695427645668	0.0125356584455443	10.3461200868764	6.56781792247917e-11	0.03483683453951
uoT.ogUhToQUzknqTg	GSTM1	9.3937080934656	0.0578141050106973	162.481250755806	6.56590504862138e-35	0.323835763637783
Evziop8AN6g7F.hdek	METTL18	0.0830411903149428	0.0211647643866639	3.92355845771984	6.56344162849618e-05	0.0324775246990287
lt5yU7ny3RdVJUZ6Tw	PLD6	0.199287562967763	0.0221505280670639	8.99696668017984	6.56191730029088e-10	0.0494864273178272
rUcQV_UBElR1P0hZfU	RPP21	0.0676345734150972	0.0119282234714452	5.6701296364045	6.56165406056413e-07	0.016800267894219
6hfsuJYjZlHudSXqQQ	F2R	0.0828182729948059	0.0146058722289432	5.67020385339891	6.56048001573561e-07	0.0140565894514794
Q91CSC4mep7.LlKea4	PRDX1	0.117811069682719	0.0151486541595533	7.77699909456466	6.55940353700175e-09	0.0180838686919912
liWUoFdde0Oquyz.5Q	CTTN	0.42871022171337	0.0414334051579479	10.3469705200209	6.55876341702956e-11	0.0677147361040234
fXHKjeF0Lv94lSn164	XPO4	0.0384992207460958	0.00981163184991728	3.92383462149779	6.5582268063022e-05	0.0157961127015651
rcoepWKuvxeRb4dLMs	MYH9	0.0432715268638017	0.00909333368151011	4.758598813083	6.55299250710398e-06	0.0119837580261482
EtF3iuXnpNd1VOfHDE	TAGLN2	0.153386966544047	0.0270483935439101	5.67083462073413	6.5505106770022e-07	0.0367425464700351
BiglKEaC4iEcCCu6lI	DDB2	0.217736787219396	0.0326292089431919	6.6730636221822	6.5495350429964e-08	0.0433605563754254
6Wpq1EvFJGe3SAGAGg	BRI3BP	0.321473721374216	0.0566880031053954	5.67093042202467	6.54899790835335e-07	0.0453017658090587
0Nwe7usF_bRonvLgYo	KIF1B	0.376065135809528	0.0150933219708834	24.9159950695412	6.54786268888269e-18	0.0450120545065912
37o1dZHBLvdLqSGXqQ	SLC17A9	0.25045575580686	0.0441641512241651	5.67101934180995	6.54759412885132e-07	0.0523277599866501
E13JXoccsWC0ctEyh0	RBBP4	0.191997319476403	0.0338558291980828	5.67102694053275	6.5474741820989e-07	0.0375091772047901
fnkUDT0mUXR5QtE6Go	TNFAIP8	0.095060780304033	0.0167613475658514	5.67142826258816	6.54114251459739e-07	0.0214488646631585
rZIpCQIpJfpAUoLeoI	HAUS8	0.148472151877492	0.0261788478205896	5.6714547903334	6.54072421038086e-07	0.040972583563029
QrqXuuOv5NfXV_1QwI	RUSC1	0.139502967229239	0.0155022348389997	8.99889394516748	6.53925292975581e-10	0.0288317446070052
QSm126C4TbfwFebpDU	RPLP0	0.0210203730881552	0.00535572449514882	3.9248421212098	6.53923843660346e-05	0.00741975183824867
ov6uPlCJpN11SSQ1OY	ESR2	0.508517053859544	0.0565086646457893	8.99892179450812	6.53892602491011e-10	0.104841843767491
BXi6rrkpay3lbR.o0w	CRYL1	0.263367883476931	0.0292662600236694	8.99902766065531	6.53768348844651e-10	0.0569357251845193
fxFV3VGC.O.o8TkbuI	MOB4	0.10966752574515	0.0193358935590801	5.67170714971433	6.53674625971529e-07	0.0313680094387381
3qBhqf9R4KuCE6SXzw	KANSL1L	0.232203213356105	0.0487861415184689	4.75961422913923	6.53542957394095e-06	0.0701550214256371
cTd.vVcvywPhUiuFP4	CBLL1	0.04282978320454	0.00899820017330641	4.75981667218258	6.53193390945661e-06	0.0163876081620303
fqlQEJ4I55QCTBQ6S4	UBA2	0.190974771949609	0.0401212319444044	4.7599428705041	6.52975577565062e-06	0.0482997747827922
KW6.sdAlSDVQuXn.jg	CDH1	5.65068799985267	0.0533535606326988	105.91023228522	6.52919650015848e-31	0.267263361804034
iLomllojl4ZN7eKJrQ	SNURF	0.106574160672586	0.0271485424764569	3.92559419221149	6.52510122974604e-05	0.0266699571206023
ueMSoPu3ShNcU4RLEo	EAF2	0.545527474411132	0.0173549443915271	31.4335478180769	6.52503442799607e-20	0.0486912280984627
WXl3v.V2IUlB3RP0tY	BRE	0.0520579706623066	0.0109360482894142	4.76021770246728	6.52501489334059e-06	0.0193873394968713
01kigeOLuQ_IkyS6SU	CTSC	0.213642010894963	0.0544220168502181	3.9256540506934	6.52397738754525e-05	0.0323687981079215
91V_0SAUqHfSj_I6X4	COQ2	1.04644622172081	0.0883438087793251	11.8451562840667	6.52349291496494e-12	0.0700038281436985
cqcdO17JS9NdMMIOpI	GSTA4	1.00341541793475	0.0227290417759468	44.1468420809814	6.52191070702474e-23	0.118401482082001
WQuX3Ua5D0h9LjdS60	LRRFIP2	0.517244114002669	0.033723086937406	15.3379824024632	6.52140279477849e-14	0.0549670379358357
3ebvSAX7jt_HvkUp4g	COMMD8	0.22263274304467	0.0113392554238014	19.6338061648525	6.51842782465153e-16	0.0288170926649567
iWCth3hT5.UdUnOigo	TNFRSF17	0.672164834793968	0.019074585074831	35.2387657271189	6.51769859188752e-21	0.045627119164296
TWu_TX6IieInosSBec	PMS2P5	0.143982427641628	0.0302443202814143	4.76064352916232	6.51767639522525e-06	0.0332572426017069
ThQC4HM30IR7f.qlK0	CHPT1	0.709508223517001	0.059894785979319	11.8459096550071	6.5163015547643e-12	0.0743560666032941
lmf3XcQ2dFE11YAu7o	APOM	0.0689140415865546	0.0144754869377623	4.76074082225022	6.5160008951317e-06	0.0327906584201374
3Aq_iknpEIp4peng8U	OAS1	1.26685828781402	0.0402998397698876	31.4358145106231	6.51560302129713e-20	0.0719748752217153
KqedeJ0u0K49B7LlIQ	C17orf58	0.783554552649906	0.0198560356322808	39.4617821583703	6.51494962061422e-22	0.0764189855294666
lrTzfcSS6Di61aI7nM	IKZF3	0.539507555084283	0.059937513955584	9.0011667064483	6.51263052899715e-10	0.0763909472083178
0XpPp_uiiXOjCuigoU	RDM1	0.336658888502191	0.0325230819365953	10.3513833393316	6.51198927375584e-11	0.0605524990895763
KPqFUxbyV_zsxQR5QI	RHOBTB3	3.14698864406421	0.0330910158880841	95.1009982500244	6.5117414605909e-30	0.152363899038928
Td9zVITqUK57N4qO54	RCOR3	0.116869604770964	0.0205997349434083	5.6733547830605	6.51083637206877e-07	0.0283250568312265
KDct6V64dGX9opIrqI	APOBEC3D	0.16347452880261	0.0210100273003419	7.78078612015655	6.51029475255766e-09	0.035613436122906
9knoESip7oAHz4Im2U	MNS1	0.19359139299855	0.0406609998959568	4.76110753532649	6.50968968972315e-06	0.0623218040421234
ZirTd9z7F5JGfXqe8Q	ALG13	0.248149513957998	0.0161769216658393	15.3397240268532	6.50788631740233e-14	0.0342776736162106
9oI3rP16XA9V_qKEqI	FCGR2B	0.602703067473032	0.0241814328610053	24.9242082112075	6.50571745002696e-18	0.0530924380247991
K0ko.7J4eud4qIuXJI	THNSL1	0.22897451106971	0.0294265952016833	7.7812098035933	6.50482448454613e-09	0.047019094687758
9iDnutZBFSNhB16q3g	LGALS9	0.255698961925638	0.0450649117659535	5.67401448057019	6.50049227929081e-07	0.0415514503169996
Ho4OiKECkn3hEUlUoU	MAP3K6	0.681306113051181	0.0392047104359353	17.3781697524461	6.49480460108395e-15	0.0972001242792915
ui4eB8ge_oO9SO3EVI	SPAG16	0.143151780937957	0.0120821825416169	11.8481723351615	6.49475270890213e-12	0.0331671582429574
HCA7U5JT.1BI57EW9M	STAG1	0.0841370811949981	0.017667974354723	4.76212380127813	6.4922327085589e-06	0.0256385494399375
0VIE_Rjl14U5SLDdJ8	ERICH1	0.0495949853938358	0.0126276832828382	3.9274809387434	6.4897737632483e-05	0.0196535287128254
rde4qmtUuRI7.0L10s	TTC38	0.164520372278029	0.0211399892193923	7.78242460630535	6.4891664740347e-09	0.0346727695862976
rXpX3TlQhL79Eougu4	CSRP2BP	0.110141377030368	0.028043338960769	3.92754148086465	6.48864345487938e-05	0.050391769350975
6ip.voLuHQ35eX3qJ0	DVL3	0.120709972627457	0.0212706657472756	5.67495037821832	6.485846694758e-07	0.0342210825257733
HVS0Y.k73ewn01OevM	TANC1	2.47004037202984	0.0500370994398915	49.3641797721917	6.4843018879512e-24	0.183984623899924
xpehHzqhJMX6HhxScE	HNF1B	4.91257993848993	0.0271649879123005	180.842338467063	6.48369391729111e-36	0.187723347519151
BVAAoikiCA4ldXaYJc	ISCU	0.372921646425133	0.0243054215251289	15.3431466325147	6.48140922459694e-14	0.0428172625663364
x9d6eNUlcCgqyFbt.U	BCL2L13	0.0416257572029321	0.0105971981638839	3.92799649107214	6.48015502886154e-05	0.0152915944087216
9Sft35eUe7g2mGiR5E	AXIN1	0.099724300885603	0.00841574095815792	11.8497350835085	6.47991319692254e-12	0.0277185487701999
uucuo1cSjZzvXzR3lY	FAM135A	0.144086975425795	0.0215764853773096	6.6779632042075	6.47964363313566e-08	0.0452815609112558
9eebDoPl_ITUgjUFYM	CENPK	0.31090142961828	0.0399416777417011	7.7838850843685	6.47039390716926e-09	0.0416813065273577
To5SSeSQkr.11e_JCE	SLC10A2	2.94244700864022	0.0666247945930056	44.1644439823778	6.46859147396489e-23	0.22914443397375
K6bnLqOkjigghVG.ig	TAF13	0.123355387742988	0.0258951646607467	4.76364562106753	6.46618241731808e-06	0.049025743120767
WrvoG0TB.oQhegqi4U	NANS	0.212783170983898	0.0273351029339618	7.7842461942783	6.46576104550797e-09	0.0380526211899983
rnE3rF_npPOoOK9xR0	TMEM14C	0.0657891978232387	0.013810245649032	4.7637963505631	6.46360816796558e-06	0.0179832500295806
omuAgUECFzXronhdeo	TMEM189	0.0660174188783331	0.0168027829979488	3.92895741654178	6.46226625961778e-05	0.023355159798149
cMHbe1Kv_unpgnipu0	NUP214	0.088793037776603	0.0186386266938856	4.76392597131267	6.46139527788183e-06	0.0263135458959376
HzqJNpx567t9VBpGis	CD74	1.17551137991316	0.0598425873569001	19.643391635165	6.45822927639793e-16	0.082459407987502
rXqX_eExSVSHHwPSf8	TRAPPC2L	0.523233115471081	0.0300994509160563	17.3834770916691	6.45789723203366e-15	0.0737068433279921
BMozoilXp9OIECkpUo	SEC22B	0.113691772715816	0.0238629706640878	4.7643595726711	6.45399853753119e-06	0.0267436648312153
NX46UoAwCCe37Ya3R4	POMZP3	0.746685354028842	0.0629980954593605	11.8525067874555	6.45368075842658e-12	0.115013713607715
iiipihinwAfdI0NuTU	TUBB2A	2.19662105500459	0.0497316490261637	44.1694795571519	6.4534218163092e-23	0.131210336003413
oCkSogqMFcRUhVKehM	CD74	0.108286623764433	0.00801542190214756	13.5097846484438	6.45255301901541e-13	0.0163363480529929
0eucdTkqtLkkihLeiA	HBEGF	0.388558253761642	0.0327819416418565	11.8528139061026	6.45078090751106e-12	0.0739114998110082
6OBBppAliCiBFWJilA	RBPMS	0.591108947182858	0.0884863992563847	6.68022376489917	6.44765976374974e-08	0.120814207283056
EuSXgo0uyw5SgLn.xc	UBQLN2	0.0610641823091288	0.0155387874808583	3.92979068568585	6.44679533832735e-05	0.019744580155212
iFGqIV01eVe7p5kLPc	SAMD10	0.225434589256173	0.0250281513585355	9.00724092749628	6.44203281306806e-10	0.0594358125226884
9SqOJnFL9P7KSovdZo	FAM89A	0.214546384581571	0.0545906937496362	3.93009082400607	6.44123220341521e-05	0.0744289126034275
upUk6dF7Vup7v377.0	LFNG	0.769074869613283	0.0347149589795647	22.1539904473459	6.44088101346522e-17	0.106713312649414
34jhDd_BUopor5LieI	GJC1	0.345046379295258	0.0607701295393357	5.67789441804487	6.43999984556342e-07	0.0318125071690844
HrnXlRFJR.rhDhX1CA	CMTM3	0.828743961076642	0.0421830944543111	19.6463529240194	6.43974953137498e-16	0.103981568975096
32XiiRKCAggmeSvl64	MSL3	1.20206557173057	0.048203733799567	24.9371879931294	6.43968967231078e-18	0.0794355273924757
uhKJ6Cu.DgZ5YPR9CU	CCDC58	0.684688318242909	0.0446092283781836	15.3485801735535	6.43960659347129e-14	0.0589376137583738
lfQux3sp96itX.Sq7U	INHBE	0.904900797182575	0.230237372832613	3.93029500836276	6.43745043768212e-05	0.101609770934203
3X10r9WIq4EhtJlO.U	ZNF841	0.387004818036153	0.0429637525009384	9.00770522844112	6.43666943766917e-10	0.0643479881672819
osj1QiH8ktFJfDk7Eo	AFF3	6.40836706183206	0.0604665890502178	105.981950734973	6.43530549504776e-31	0.332263857164144
9ndUbcRU0XUl4qZB4g	NDUFAF3	0.383026182551745	0.0803753703199612	4.76546709554159	6.43514536893446e-06	0.0966458867511236
o3qVxJeiBeiDXEVEgU	XAF1	1.0778492442832	0.0384575768247874	28.0269672006086	6.434740470504e-19	0.0608296607822861
3msULXnfY6rp4iMCvU	BTBD7	0.0779634896440702	0.0137300471005403	5.67831188583485	6.43352607895013e-07	0.0333413050802152
K57zV5etdEdFQQ1QpU	WAS	0.0596217100112519	0.0125107125212457	4.76565262849756	6.43199267243432e-06	0.0149229958661537
E9VUedIhpiBzvufeh0	NOMO1	0.263926422360692	0.0292980911911373	9.00831459083346	6.42963745604472e-10	0.0478876716112305
rNWwSR7oMRXwQvol6Y	SORL1	0.2330344918107	0.0258682559119137	9.00851192303907	6.42736198123435e-10	0.0332495320551576
66kEOpN9TlFFSkwUvo	CAND2	0.399907623396763	0.0443920695234968	9.00853750882444	6.42706700829411e-10	0.0940793972019817
0_qAhAie1eKl7IyeXU	UFD1L	0.12282972891365	0.0257716756471939	4.76607460823076	6.42482809161178e-06	0.0446729600273055
uhScUXyfTVcfkUFLVo	RNF216P1	0.0929522432521873	0.0139108962417547	6.68197373028947	6.42301315033485e-08	0.029073281056819
60dE_G1HtXkXnH0qkc	RNF207	0.202230781990315	0.0424302710300089	4.76619114328275	6.42285096295425e-06	0.0669347176973005
BgnCcruCDoPoJUeX1Q	AASDHPPT	0.0690489359291883	0.0144869069115606	4.76629941441032	6.42101460604467e-06	0.0226809562950167
EpTVAnPeqkEiuAcepQ	FUCA2	0.208224569893267	0.0311611239453107	6.68219061220999	6.41996541959989e-08	0.0435369121273016
K5WlOenU0OC6f1FeOI	SNRNP40	0.115991685716442	0.0295037310301821	3.93142432046251	6.41657553578711e-05	0.0278787662475992
05.K._ASVaYZdz6d2k	H1FX	0.574582412456879	0.0425174962190032	13.5140227801107	6.4165510092588e-13	0.070174649533384
W38p0ogk.wIBVRXllY	A4GALT	1.14768567790282	0.0259761819501775	44.1822312495382	6.41517346716873e-23	0.0847355397282714
WV_hIIelxckhej.314	C9orf91	0.49190041789229	0.0197217128275435	24.9420738550304	6.41501722801876e-18	0.0590320011791563
oqiroIDroezd0b3gkk	UHRF2	0.122686677342588	0.0312047389118351	3.93166812544799	6.41207809564018e-05	0.0349379302142276
6t3N9OLuH4rvqOriok	ARHGAP9	0.289031922786051	0.0278955691759111	10.3612125984381	6.4090507103035e-11	0.0341664113566088
B.7mrn_C5fk0qPKJDw	TDG	0.0757936588747119	0.011340798975444	6.68327328954743	6.4047736373039e-08	0.0178189137511906
Hl_fyRKzglIJSTdB7k	POLR1E	0.135904121637318	0.0150826086248406	9.01065094359661	6.40275040455089e-10	0.023989517331013
9kXkikp9InUUlNDlKc	TCTN1	1.08106195017401	0.0273718401305418	39.4954064110489	6.40254164536987e-22	0.0839439920629547
NU3FdxRfkS6ketHXO4	ZIK1	0.270809931112529	0.0300541117982802	9.01074478361478	6.40167293617195e-10	0.0593434295748389
9HEI7.o8Fp5Iq0Kfec	ETNK1	0.292582461848967	0.0613705091874596	4.7674765245186	6.40108512403256e-06	0.061020358549382
xUu3o65RHplw0VvwQk	YIPF1	0.101639618604346	0.013048543713463	7.78934575660562	6.4007044202944e-09	0.0268920003941571
f.uF_66iJIroZpYiVw	GNPTG	0.184339880151807	0.0324493728092508	5.68084570495164	6.39437864238551e-07	0.0399161843628934
HyCkilpI0fiVKL6IUg	SPC24	0.150533448518276	0.0264983082316283	5.68087015980136	6.39400202611981e-07	0.0307905985430035
Bl1ZGRZkl57lbq1Yuc	SPG21	0.299261476996939	0.0384159707199618	7.79002772514702	6.39205625486608e-09	0.0570063208850766
6V7eMioFXseB.u_FMk	SH3BGRL2	0.659302233681465	0.0487759569537799	13.5169512779876	6.39179671074559e-13	0.11711614643881
0VxRQHTYShYtXAWdTI	LSP1	0.422952139343813	0.0469336917948315	9.01169550421749	6.39076745590248e-10	0.0554539646666893
r4UKUSJzq7SRSj_CUo	HSH2D	0.11886415624763	0.0302227211469759	3.93294024285841	6.38866436676441e-05	0.028371964734184
BGiPJam66TmXutcnPc	LOC399900	0.503449178523738	0.0646248598939762	7.7903329980088	6.3881889853963e-09	0.0405223837899547
Tq_3QNe1EKQdSCAglc	SYT15	0.155236815554729	0.0273241569880051	5.68130301779762	6.38733962817694e-07	0.0490877514428148
T0iv0uJQjZFHndSXpg	LILRB1	0.260836643418787	0.0219933155491966	11.8598145347992	6.38504792855114e-12	0.0269953465853211
WVej5VLXuFO_V4IIU0	UBE2F	0.114680162918119	0.0110655593376969	10.3637023143908	6.38324742946402e-11	0.02250184806887
6Uo7ckVU1X6V9dOfeA	RELB	0.145545443561731	0.014043651907953	10.3637888859455	6.38235216064485e-11	0.036819734060465
inpT8ig9yhLqJ7vHJE	USP8	0.0436202843988742	0.00914735312392889	4.76862364532165	6.38172520039244e-06	0.0186875226633688
legNVGV79X8237r6Ho	IMP3	0.0437860177502132	0.00770652296934224	5.68168263747489	6.3815026036723e-07	0.0126904517461347
363QqASg7R.hXt_gbY	SPCS3	0.35994277990717	0.0114379558800078	31.4691526775608	6.37852155578459e-20	0.0397272657773416
cdJWE1BKZQHRIlfuSM	BATF3	0.574688064453594	0.0425110511824621	13.5185569038735	6.37826688456975e-13	0.0578993141945771
Knl3qArhuSe.jdSAJ0	WDR34	0.185162358456371	0.0237656858279961	7.79116410931636	6.37767263284839e-09	0.0429738690874949
0xUgV0IS0uoWQIXqXc	MB21D1	0.205690301893915	0.0362005141658481	5.68197183475269	6.37705963860365e-07	0.0492853683822436
fEk0L3mqUU2Wl7d17c	ALKBH7	0.0938373228645355	0.023855435393369	3.93358248622112	6.37687730010225e-05	0.0310410115837152
0t9BJAtEJY7ooR0qLU	DOPEY1	0.188725719097222	0.0209393152903497	9.01298425857314	6.37601542583681e-10	0.0500660234029814
6RQiuvAlM_iyYoN49Q	SNRPN	0.12607218569199	0.0320498214351639	3.93363145398583	6.37597952059373e-05	0.0361978981296602
6zxLkDfq_HR.Cv3h5U	GJA3	2.45061009251	0.0356517995514935	68.7373463146083	6.374015684854e-27	0.170682917431436
iJ6OnjpKeJLqgkr.BA	PHLDA1	0.155489931414074	0.0273644858994653	5.68217988765916	6.37386529381124e-07	0.0557007163703232
EUuX6BeeX6oV6G5YTM	PEMT	0.141474726091043	0.0211611418791515	6.68559035703208	6.37238705942979e-08	0.0339264361965243
BvS5z3VJyvzU4KHi4U	PDE3B	1.10125747002144	0.0928418497937289	11.8616493797588	6.36793548629976e-12	0.153814801478468
u16lXhKZ6e4uv7E5xA	TSPAN17	0.191642517465641	0.0184888527179035	10.3653006700663	6.36673935555334e-11	0.0323713362562844
lkWrpI73OS7r0L9.hY	PALLD	4.07766159881874	0.0922571732222634	44.1988569170113	6.36566081948819e-23	0.246927967486398
cKgKgtuiKSoA68JJWk	CCNY	0.0925534520386787	0.0194048569654579	4.769602383745	6.36525514939403e-06	0.032038629181628
EUk3_443orP55056WQ	CENPT	0.120239536001742	0.0252093082806073	4.76964836414168	6.36448248548642e-06	0.0353457261246824
3TpLZ_gVHRFDUuFu7o	DYNLRB1	0.0355392254155116	0.00903282693135692	3.93445215828715	6.36095210504979e-05	0.0144716385328362
oi5daXVTUXeXCwN53Q	ANKRD33	0.19889676375883	0.0255241177976531	7.79250297054803	6.36076950189866e-09	0.0520438023163887
3ERdCVTludNcVUNXUM	DCXR	0.0828959964327147	0.017377851983606	4.7702096042087	6.35505914211679e-06	0.0237954383780145
9epBIuAXtXv9ed8d0U	SLC35F6	0.181887560182893	0.0320024119558087	5.68355786539017	6.35275048880729e-07	0.058572341102264
6fIJR4Q903itTlJCfU	SQLE	0.150519006047885	0.0225091543598912	6.68701292111147	6.35258792753315e-08	0.0311753173528737
6q0bt.ri4ghcB16U00	AFAP1L2	2.64003055686179	0.0941349374883419	28.0451724652045	6.35236783616761e-19	0.225469188180652
BNHPXrzdFBgpyimm0g	NFIB	5.63138885315485	0.0913905023761079	61.6189725052551	6.35192710942669e-26	0.272782759560391
rdd9atbqYt9NwqFCMc	KRT10	0.194553988335333	0.0215808786059216	9.01510971300073	6.35176351402461e-10	0.0314167050362296
3qwoqLpfiEfs9QHdeg	DSTYK	0.351939776113937	0.0619215793762896	5.68363694303149	6.35154099046495e-07	0.0896275936907509
QgqHUvlCvjeASkqJwk	KLHL6	2.5744148909241	0.0335790687994619	76.6672508489979	6.34725007979648e-28	0.150626301805972
Q2bdffRdqtYgXEWbog	OGFOD3	0.157672098603794	0.0277400302311907	5.6839194943093	6.34722130597306e-07	0.0423905575729442
HhaCQVfRIRiRNpAVzg	GAS7	2.58017029904643	0.0653005078600299	39.5122547067622	6.34698103119422e-22	0.129617414315576
34Kf76KoSJEoEl_Et4	ELMSAN1	0.114202560404165	0.0200912945492464	5.68418128181038	6.34322179040852e-07	0.0249629416595848
xA4dV3ldlWZ3nFP18Y	DUT	0.106673036217317	0.0223589408227079	4.77093423445976	6.34291387358557e-06	0.0375717212590451
l6VyLqLXjBUpe3hx.k	RB1	1.31838867328477	0.0238833372203515	55.2011915722288	6.34264992113208e-25	0.0887572550230314
9nIOLxSIkn6ivj3rbY	ACADM	0.0644851643892915	0.0163853737628912	3.93553209847031	6.3412338100986e-05	0.0166856982229814
rZ1e6.uVHnQxJdY10c	AP3S2	0.0788550976953858	0.0117907515405504	6.68787714033236	6.34059111355537e-08	0.0328784356729898
Qf55R5Sl3leSeAfpTQ	INF2	0.276851543064109	0.0267027760819673	10.3678936682194	6.34005321688688e-11	0.0613382820372732
TXVRJtLgLbX7dIOFKo	AGRN	0.244730103508521	0.0271433426752625	9.01621095221847	6.33923601527986e-10	0.042870414464139
HpJXi5Tjd3ID1kLQTQ	GPN3	0.148257682707594	0.02216715472254	6.68816925596876	6.33654140015162e-08	0.0284617197719317
BseDuoCXEvvXbV9u5E	ZNF77	0.213555223834331	0.0375666241732725	5.68470626610813	6.33520913214516e-07	0.0604476467356107
Z3tHSez0beJL3ksEXk	MFF	0.126898525687205	0.0122389918547432	10.3683805981149	6.33505496231201e-11	0.027312461667836
N_qS0pP7N.rKkELAE4	C4orf32	0.514597843654863	0.0232081835165465	22.1731202395903	6.33436965697296e-17	0.062332782625237
QjuMi7uqd7tfV6iek8	TEF	0.104722708676904	0.0266067426428772	3.93594624048949	6.33368890923752e-05	0.0454413563513652
iMeiqS6uUsu15619eA	LACTB	0.278282312505192	0.0125501751162227	22.1735800439532	6.33183231997408e-17	0.0320293863933045
fn1IPzBE4lVACWoekk	RGS10	0.364946953567213	0.0103415257809574	35.2894690103868	6.33059082435933e-21	0.03254347991714
Qd3Xe10071J3cSpRMc	TTC5	0.124952158445542	0.0186813001339543	6.68862218098164	6.33026765346949e-08	0.0364850132113244
rL_WHgi7qP1ilSuJG0	ZBTB46	0.586805269574612	0.0650775350822312	9.01701745207669	6.33007778063467e-10	0.102313041415124
9oiqK0d.466V4F0968	ST3GAL5	1.01428505858557	0.0256664233747865	39.5179742722533	6.32823441353919e-22	0.113185300594374
Q9Vq6GG5_bV5K3fZEI	SEC14L1	0.461061733970332	0.0184720581086633	24.9599547196149	6.32556232669709e-18	0.0656677719723903
WVHrohnz3HoWnnsX0o	RRNAD1	0.0927369450646495	0.0194332464010569	4.77207683939034	6.32381204074842e-06	0.0321356174843356
TFIWCCIPoaWOul3XBQ	ANKHD1-EIF4EBP3	0.118717632728787	0.0248773878078535	4.77211006419691	6.32325749019665e-06	0.0462713186654957
B9D_FSZdtuuJdO8Rpk	PPP2CB	0.135959469920971	0.0174407113501344	7.79552319807893	6.3228105137005e-09	0.0294016215603263
fTlw44XHSVeUE09Dx0	ZFHX4-AS1	1.00027943562922	0.149536923784081	6.68918023934703	6.32254654146936e-08	0.168154937012871
oiZs6LoBn7Kn0UrCa4	SMA4	0.20849080355379	0.0201059589153298	10.3696025855711	6.3225295762073e-11	0.0516835502787073
Ei326OO4U_KF7SnE6I	OSER1	0.224011443390631	0.028735710109743	7.79557708979946	6.32213533889093e-09	0.0324916106924404
BXUjpPTt8dICpHlPtU	PAQR8	0.715195756406846	0.022716127625651	31.4840525723781	6.31823348433435e-20	0.0694271619769777
6pcH6JO0elOquKoSHc	ZBED6CL	0.0806311548162509	0.0204807919891653	3.93691586042699	6.31606054620348e-05	0.0407620393348807
9XKsy9KrNQ1.p9XqU4	UQCR10	0.132734397849096	0.0233440863217782	5.68599670252524	6.31555838356496e-07	0.0352391382717741
lNSX0dSevADvkfNJBU	MBNL1	0.115476423302802	0.0203085214112776	5.686106879188	6.31388355743054e-07	0.0218095159190964
6VYPhBUB3UhNFB7VeY	IKZF1	1.63871933932906	0.0370608290595371	44.2170178302407	6.31203232762686e-23	0.108673962698001
BeoifQooIqj64IHpTU	CFDP1	1.01836574782083	0.0288533023373134	35.2945994158828	6.31197373439516e-21	0.0730173160204572
uHreSe986yS_6T13uo	SNORA41	0.523531903786062	0.109690778733998	4.77279776685365	6.31179047908435e-06	0.0826767293419896
0eKLH0RSdfVemNInSs	HPS1	0.0968157263507187	0.0202842290765674	4.77295567828906	6.30916045564485e-06	0.0388346431317238
uV3PNRBCU27_VK0uqI	APOO	0.0767981711444355	0.019504897741564	3.93737881438785	6.30766163978729e-05	0.0233790881863225
ruGnrh46OrLqeIIqhw	KIFC2	0.251997661020919	0.0443140781237135	5.68662762920185	6.30597374619813e-07	0.0542899620678976
xp3z31EIih.dKV6_cU	HLA-DRB5	29.5704582083605	0.077827133674451	379.950498139286	6.30513655530934e-43	0.752900465093993
6ci5bNNIfFe15VF9Xk	USP24	0.503444823923243	0.0127373062974454	39.5252192391898	6.30457115780752e-22	0.0528389044354955
3ioggwJJ5eiXPRzvz4	TUBA4A	0.484133356888685	0.0620921502322121	7.79701387499264	6.30416248458159e-09	0.0457379917558966
WyM_9RTVXX6V9C6ngk	ZDHHC18	0.130470619923872	0.0229425288399397	5.6868456321494	6.30266550480757e-07	0.036045548862797
xSR6B9_JKJMVKn0w0U	RAD51C	0.106431268407511	0.0118001658171212	9.01947227326978	6.30228688014783e-10	0.0233930026264734
iSehC.8DhFFCXupfdc	BCCIP	0.0944210792189023	0.0197804673937655	4.77345036086773	6.30092885709568e-06	0.0234885323966113
KeeFXj98gM1RMNSfNU	USP48	0.306238168653447	0.0122667307062842	24.9649377642701	6.30086602893782e-18	0.0382687238628968
KkABFFdQSXfKLEV73k	TXLNG	0.300781875306432	0.0172797270902003	17.4066334344488	6.29941340725335e-15	0.0499910354475673
ZqhHVJVd7d_c8eefeM	EFNA4	0.0916368775000126	0.016113114553331	5.68709898987646	6.29882301691422e-07	0.0380976554651167
Qn9O1SB8l.F7gu8cSU	CYP1B1	6.75697630735296	0.0461790334904451	146.321302041782	6.29846761582748e-34	0.176366007322526
WFwa905rmw_yOTsfu4	NPTN	0.0403800776116603	0.0102540537348762	3.93796235671354	6.29709148464248e-05	0.0139097890914435
KxNyKUIiSiInFB8R7o	USP47	0.281834930277658	0.0312451465494894	9.02011868727381	6.29499006624514e-10	0.0646409135709545
crpRMJTz0cs4cvu3pI	GHR	5.48393389546549	0.703265927005827	7.79780974007014	6.29422989645616e-09	0.411945663612538
KedHu197rdKJ5L7574	MBP	0.23068845746803	0.0104003497647988	22.1808364800214	6.29192951925839e-17	0.0287080282769499
W5KEOeUil610idGwk0	C1QTNF9B	0.201090922585174	0.0510603646429927	3.93829781653881	6.29102334035609e-05	0.0710846673848922
HqCKfuFLFDfi.f.e1E	GOLPH3	0.192456974666357	0.0213354982296779	9.02050529097309	6.29063024308993e-10	0.0300268092923422
B0lK3X1ev1LREiVJJ8	DBNDD1	2.33826566933535	0.0936531573336938	24.9672913963158	6.28923633711223e-18	0.144839396153738
oq0RwXtH76iTiSf3t4	PPFIA1	0.199254975915314	0.025551257983207	7.79824523889471	6.28880167849185e-09	0.0512843259969028
ZVVCvevU.9d70QHF3o	HMGA1	0.125037779178345	0.0317476898484538	3.93848433618973	6.28765199820531e-05	0.0244810409154992
fUr.XrdIXOOH7V.jtE	CHMP2B	0.0508548994816182	0.0106517900882569	4.77430545103242	6.28672631654909e-06	0.0193680209781961
3nqSAeSkRP6ujRen1I	ANKFY1	0.0765230126314172	0.0194290913028231	3.93857908425693	6.28594014337939e-05	0.0253426066161596
c9Pl_7XedaiH2uPeUc	ZNF519	0.168468712498075	0.0296182623383495	5.68800122618749	6.28515926418386e-07	0.0475604657211229
f0gM68T6BE4sV0.d0w	OAS1	0.956151062319049	0.10598928523187	9.02120492866141	6.28274827164471e-10	0.121182637260826
xQl1XNSVT3IHk9IoRE	LCMT1	0.10857872154191	0.0162248450824845	6.69212685790913	6.28194053575037e-08	0.0298015738762697
ufoTZ9l1LF7ujXaYb8	NAPSB	1.80823923936221	0.0919184036441276	19.6722219672462	6.28064635927005e-16	0.0838323459876865
f8fArFgoKUrkunRlSQ	TDRD1	0.515895026405723	0.077088304623864	6.69226063438446	6.2801034865358e-08	0.077791029100469
rXg2T3ceh3pefoiukk	PSRC1	0.437118589264816	0.0323050258172038	13.5309778651231	6.27460724122474e-13	0.0740131634400035
WUqkqw6vmM6nCSTkKc	PPM1A	0.17663308035129	0.0310497160714681	5.68871805283913	6.27432541112051e-07	0.047896639532612
ceSfbLHV9axcfEX1OQ	PSMG2	0.0572431410051759	0.00634484594824298	9.02199067906885	6.27390846120472e-10	0.0142520831516558
TsHsL0TgXbq.6fKesk	UQCRHL	0.0840878776272685	0.0176092440985467	4.7752122213019	6.27170172505685e-06	0.0163451351452347
rRI_pNFNyD9L8Kil5k	GALK2	0.263188390435393	0.0668093219514121	3.93939622118601	6.27119657583445e-05	0.0611921401438586
H0knv6XD3yTz.tf5lI	SEPHS1	0.3719704208252	0.0476904215568082	7.79968825358597	6.27085028568146e-09	0.0491559481526851
Bnu6R9etwJ3nIQ_a4k	MFSD8	0.0901370855530559	0.0228803556870013	3.93949669253892	6.26938624778142e-05	0.0291456172965469
ZStuSAH4h6r0qfuqt4	IL3RA	0.474421721425298	0.0272481772816865	17.4111360374977	6.26907214456967e-15	0.0730914535903917
3NpGp3qdVuiIJ7L.xQ	GRAMD4	0.303301654318762	0.022413873971942	13.5318711392078	6.26722055261556e-13	0.0606193967177365
KSggllXXeqUz.3nq0Q	SOBP	0.215408870946245	0.0276157420321357	7.80022027637641	6.26424531037574e-09	0.0640608907033897
Tun_CighF_JQoOCql4	MTERF1	0.0652502750433513	0.0165610549506272	3.93998300457786	6.26063134861132e-05	0.0259047040272873
iYLSAHTTSmGV6aerog	ATP1A1	0.149895649664473	0.0192158067164925	7.80064307869109	6.25900146518873e-09	0.0254439693786349
xONB.H0qk_3r3.nnvk	SLC25A40	0.183260622337411	0.0176616075473102	10.3762141609426	6.2552078726596e-11	0.0351412163981738
[truncated: 13,592 more rows]
