# Supplementary material for: Integration of genomics and transcriptomics predicts diabetic retinopathy susceptibility genes
Source: eLife. 2020 Nov 9;9:e59980. doi: 10.7554/eLife.59980 (PMC7728435; doi:10.7554/eLife.59980)
Supplement: Figure 1—source data 8. [file elife-59980-fig1-data8.xlsx]

## Sheet: hg_all_inter_intra_individual_v
	geneID	inter-individual variance	intra-individual variance	F-value	p-value	CV
3iUZ.47hLFki49VR4o	MLLT10	0.0641896	0.0139541	4.60004	9.99848e-06	0.0222127
fEn1QlU0MCVe9GeR64	C1orf123	0.050739	0.00670566	7.56659	9.99726e-09	0.01717
ud_tTlU5LtB478JxIk	FSD1L	0.30997	0.0268224	11.5564	9.99677e-12	0.0639121
3KV3OJIIRuJ5KJ6VkI	TXNDC11	0.770969	0.028126	27.4113	9.99352e-19	0.0687931
o_rupcEAKnQqnoh6ec	CYB5R2	3.52088	0.0339111	103.827	9.98721e-31	0.135716
Nk_t6ULcQ7VDNChBRU	GBP1	1.1005	0.095222	11.5572	9.98361e-12	0.07728
oh1UuQKqlI97u.dwXc	DACT3	0.802897	0.0418221	19.1979	9.98137e-16	0.107957
oV6Se3UijQJRFQIsKQ	STEAP2	1.05214	0.0548046	19.198	9.9806e-16	0.137338
Qh7hLhw1VzhVAlePA0	ALDH7A1	2.83566	0.0421398	67.2916	9.97558e-27	0.138692
ooJDr0pIoJp54jxygk	NOP56	0.160851	0.0425605	3.77936	9.96981e-05	0.0262026
Q7voIjrjqXqb.vvrfY	ANG	0.348623	0.0922431	3.7794	9.96864e-05	0.0798422
01QpEiEak1_HU2pn38	MBP	0.201458	0.0533043	3.7794	9.96859e-05	0.0620782
oRUZkfEYghPTp.qSCg	PDLIM3	1.6457	0.0476921	34.5069	9.96748e-21	0.176724
xQwSlQl7rOO5EfnIdI	GPNMB	0.318476	0.0420815	7.56809	9.96695e-09	0.0717486
HU33xEiKSeKShLqnB4	GOLGA2	0.187541	0.0496189	3.77962	9.96199e-05	0.0484124
okB2FVvXlSMOnQwd4o	INPP5B	0.107419	0.0284204	3.77962	9.96199e-05	0.0350174
rSCAiQVFAXBChVYEf0	CDK2AP1	0.206218	0.0121421	16.9837	9.9617e-15	0.0244514
uSRSDoSRCU6CVI6dLg	COPS4	0.0815035	0.0107689	7.5684	9.96073e-09	0.020281
x36AJeiCeqI5r0Q5do	IFFO1	0.120022	0.0185124	6.48333	9.96054e-08	0.0261782
KAF1Jfd7vvWExYoUHo	SLC47A1	3.28745	0.134799	24.3877	9.95938e-18	0.248271
Ke0eei_UvR3SAAyWEk	NEDD1	0.117238	0.0133729	8.76683	9.95666e-10	0.0347376
cLUrM9S6.fHiL01y1U	FLJ41455	0.634738	0.083862	7.56884	9.9519e-09	0.0910389
9CFClE9T4UidJRmURc	LINC00158	0.624736	0.0473829	13.1848	9.95118e-13	0.0595817
936Se__l1.A9x8Xi9I	MON2	0.215413	0.0332231	6.48384	9.9493e-08	0.0369184
on_s959RO5S_Xo_olM	GLDC	0.855674	0.0503783	16.985	9.94748e-15	0.059574
3q3rFfkoX_yvuoALZI	SYTL2	1.12415	0.0661843	16.9851	9.9456e-15	0.146948
oiWI0YR5HUnu4SDiFM	DOPEY2	0.27622	0.0315051	8.76747	9.94505e-10	0.0480976
BvwUf55wj.ltU9U..U	SPRED1	1.57271	0.0260743	60.3165	9.94155e-26	0.120068
ovvJ5I8FUlXe33vCxI	KIFAP3	0.210514	0.00863106	24.3903	9.93894e-18	0.030319
Q1QkESFHfVflXVUioc	ARFGAP2	0.0676096	0.0178836	3.78053	9.9357e-05	0.0232721
fIB26Kp7Wd666G8L2g	TYMP	0.4397	0.0580849	7.56995	9.92959e-09	0.0830328
3REwfFXXzB9wEK9dUs	TRIM78P	0.105556	0.0229332	4.60275	9.926e-06	0.0371954
oXcV9m5.t6gt.6VTtI	CTPS2	0.142498	0.0162506	8.76879	9.92104e-10	0.0292866
Eurjl.9.wlSxMzzl5c	STK26	0.106481	0.0231331	4.60296	9.92029e-06	0.0251157
HVE9Hnh6fR6DK9K0Wo	EXOC2	0.0798631	0.0145198	5.50029	9.91659e-07	0.0277325
3kqjw9SS1eNMXA1ETk	ZNF799	0.107975	0.0196303	5.50043	9.91301e-07	0.04536
ZKBXf11nSI559PxUoo	CNTNAP1	0.823568	0.0300323	27.4228	9.91086e-19	0.062901
r6LcBqko3uUAiXd1os	WHAMM	0.434647	0.0944192	4.60337	9.90949e-06	0.0773146
NM7rXb025Ze645uS4Y	SYN1	0.8508	0.0348768	24.3945	9.90556e-18	0.114858
3LJ1F4IqOgXerSgEno	SMCO4	0.687144	0.0250563	27.424	9.90177e-19	0.0541313
3984BKesiiv3iXJUKk	PRMT6	0.34069	0.061933	5.50094	9.90068e-07	0.0512355
6qOXOeelwBRHSAYoXI	STARD13	1.27793	0.0211829	60.3286	9.89985e-26	0.103295
6UweKIQyXqh5OzVEo4	GFOD1	0.308471	0.0266763	11.5635	9.89119e-12	0.0648872
rF.0Kez6_i7IeB5eq0	FCGR2B	0.669888	0.024425	27.4264	9.88499e-19	0.0704567
3.orDPq_D3h5V.cnoU	RPE	0.148768	0.0270409	5.50159	9.88498e-07	0.032279
N0_ivqCguKIC7378u8	HECA	0.205556	0.0543468	3.78229	9.88465e-05	0.0678032
HCOEKKtF67lo2mPp1A	CLK3	0.160963	0.0425563	3.78236	9.88275e-05	0.0467372
WKgj5UpR4SiY1XDoxU	UBR7	0.624086	0.0288024	21.6678	9.88195e-17	0.0592603
oXrp3_6KAcBPV_Ot0I	ANXA1	2.86048	0.0828592	34.5222	9.87825e-21	0.158317
xbRJ.Xq__Jdwjrf9d4	TYMSOS	0.37586	0.0325009	11.5646	9.87489e-12	0.04715
up.x3430CkZKvw69fo	NLGN4X	1.42568	0.0950892	14.9931	9.87284e-14	0.187705
rvpF9v1nrUKOdXSB14	DNAJC12	2.9062	0.0671699	43.2663	9.87261e-23	0.209705
TSilf_Qp8q7pSV4Ccc	ABHD14B	0.235089	0.0232821	10.0974	9.86835e-11	0.0523135
xU7g3q6jDodJ3t50OU	SET	0.0504814	0.00917456	5.50232	9.86727e-07	0.0128131
BoO4.pLSrHCTq6gdeU	UBIAD1	0.145802	0.0264981	5.50237	9.86613e-07	0.0305645
lk3UuXoSPUPRIkSuUU	KMT2E	0.121069	0.0159865	7.57319	9.86478e-09	0.0396633
WVHqq_qwz3utdJXsXw	HIST1H2BK	0.801434	0.0260267	30.7927	9.85935e-20	0.0423112
lVJVEVzN1u512u8fV8	PITPNM1	0.301746	0.0139242	21.6707	9.85687e-17	0.0389343
iinpMj_nt1nTJ5.6Zg	COX17	0.116851	0.0154287	7.57362	9.85634e-09	0.0185822
rXKXUFM6WElBeucdAs	RGS22	0.323973	0.0588743	5.50279	9.8558e-07	0.0884863
oihoShWRJCRexGlhO8	TXNDC5	1.34646	0.0437237	30.7947	9.84695e-20	0.111033
WpeSSi65ISC3XQ._3Q	RASSF1	0.107864	0.0285074	3.78371	9.84374e-05	0.0360478
cSOTuOOzqsxZfKk.qQ	C1GALT1C1	0.254925	0.0104468	24.4023	9.84317e-18	0.0343367
lXnpc_cxQ474uk.3.w	OSTC	0.0769261	0.0203307	3.78375	9.84285e-05	0.0173553
KEX7C7Vd6.Xa66ZXgc	GATS	0.266228	0.0483748	5.50343	9.84041e-07	0.0710026
9qIJfiCqbjIXo7fXgk	TSG101	0.0805757	0.00696595	11.5671	9.83814e-12	0.0187069
6DjoKCHq_Soe63deqU	FGFRL1	0.542875	0.0537538	10.0993	9.83736e-11	0.0857839
05Tpl.rWQjP30Rn1QE	CHRNA5	0.282479	0.0188368	14.9961	9.83679e-14	0.0509564
6epKh_v.71BLpfdan0	TOMM34	0.0876397	0.0231603	3.78405	9.83422e-05	0.0215955
QSgfdCo4ohIFXH1C50	MAN1A2	0.167013	0.030344	5.50397	9.82744e-07	0.0452315
NrjYut7vXPnrquMq6k	DCAF8	0.138453	0.0182771	7.57523	9.82423e-09	0.0294926
EoGHR8MFKgUlAx7klk	MMGT1	0.0219128	0.0047568	4.60663	9.82312e-06	0.0119957
HTF49VhHoxYI4FQU9E	TDO2	0.271329	0.0492951	5.50417	9.82261e-07	0.0819823
Nd63i0H9nqgBc6BceQ	SLC38A1	0.190546	0.0217161	8.77441	9.81964e-10	0.0286865
odS7F6Sa56DN4aWI3w	HIST1H2AE	0.198439	0.0430756	4.60677	9.81954e-06	0.0594457
lSk6f796.Q3vdvX7Fo	BAG5	0.0758522	0.0116878	6.48987	9.81659e-08	0.020056
0flyIEROp.olYSF6n4	C15orf39	0.103891	0.0137136	7.57573	9.81431e-09	0.0249347
QH16i4VJvPXl10dc90	PCED1B	1.63268	0.0530078	30.8008	9.80772e-20	0.0932521
6d3q3oKIEp4qieIong	DERL3	0.305716	0.0555363	5.5048	9.80754e-07	0.0759213
6eSCi2mzot2BWKP7eU	GK	0.233993	0.0231648	10.1012	9.80592e-11	0.0451695
rQiV59Ix8TL.6oJQjY	NACA	0.0344312	0.00747308	4.60736	9.80389e-06	0.0101581
xV6RCA9S07gkB5X_10	FNDC3B	0.804513	0.0418661	19.2163	9.80134e-16	0.0712152
x6edx3tVxetFy4yVS4	SMAGP	0.287504	0.0623942	4.60786	9.79081e-06	0.0804284
HBHbn5v4Jdm0dLZuo4	PARVB	0.461737	0.0609377	7.57719	9.78554e-09	0.0466755
03FVHFl.P3c.V_X00U	AGO3	0.057197	0.010388	5.50605	9.77745e-07	0.0267017
3SJ7tOU1.qV3noAsg0	PRRC2C	0.0502757	0.00913095	5.50608	9.77677e-07	0.0151101
96KT.nu4pY2UewK1yI	FNBP1	0.0752517	0.00744842	10.1031	9.77646e-11	0.0136739
WkL.JXkv9FFJFxUk94	UIMC1	0.0493815	0.00896823	5.50627	9.7722e-07	0.0147598
Nd8wBK_mNP1Qj6.V_I	SH3BGRL	0.0448293	0.00814128	5.50641	9.76882e-07	0.0134284
rkIu4pCIJ6BRPSIs14	CHCHD7	0.153342	0.0278465	5.5067	9.76183e-07	0.0427782
TlR9ju_9_2R8qE0NCg	SETD9	0.313634	0.0209052	15.0027	9.75901e-14	0.0531099
fmEsnX95cs3kgR6fwE	RAP1A	0.12274	0.02663	4.6091	9.7582e-06	0.0416674
xao4d4_19JKji3v_dY	AFG3L1P	0.166631	0.021987	7.57861	9.75742e-09	0.039487
iR4i94Hx3sFNUB11Sk	ZNF93	0.491363	0.0559771	8.77793	9.7568e-10	0.0937445
9S6eSmSBIm8fjBJvU0	SLAMF1	0.24753	0.0128781	19.221	9.75617e-16	0.0281415
KJTdSrhoFS7PF56BQo	RNFT2	0.312004	0.0143894	21.683	9.74974e-17	0.0395235
0pxR6i0o04vTffX3x4	SRI	1.1648	0.0477097	24.4144	9.74848e-18	0.0952586
flIigl_8_pP44r_k6E	PITPNC1	1.22414	0.0282755	43.2932	9.74732e-23	0.129764
QAOjekg1lCaepUp7pM	ELP4	0.10723	0.0194702	5.50739	9.74536e-07	0.0326216
QYBUChumt1xxT9RbOg	SULT1A3	0.152854	0.0331593	4.60967	9.74324e-06	0.0494509
oE6KFQSiluneOeJgnM	CDK10	0.12654	0.0334115	3.7873	9.74115e-05	0.028408
Ngi9Xlgh6np8jgjgjk	SHFM1	0.0449569	0.00692348	6.49339	9.73973e-08	0.0121027
Hp.0Pe6H_xT_n0X7Hk	STX6	0.182181	0.0180282	10.1054	9.73943e-11	0.0326288
9ufhACQiiElsegij3k	SYAP1	0.312271	0.0677403	4.60983	9.73903e-06	0.055506
Q3JUhairgLdQoCK7do	BTBD7	0.123475	0.0224185	5.50772	9.73766e-07	0.0379596
NR0iIeNRExAehIaXXk	PCED1A	0.140253	0.0215989	6.49351	9.73731e-08	0.0357896
xrvOEqIHoTopUS.ukg	SERPINB2	1.01512	0.0877062	11.574	9.73657e-12	0.146902
6iovSs3vuHrglexdeo	NEURL3	3.73276	0.0771139	48.4057	9.73469e-24	0.158188
lNfX6d.8n7ppLqS1uk	MAPK13	2.44311	0.0451766	54.079	9.73349e-25	0.131885
T03kDulKfqgQ465ECk	IFIH1	0.282927	0.0115874	24.4167	9.73087e-18	0.0301517
BJFL1tPdvXqgVUd4Xs	BCKDK	0.0716087	0.00944704	7.58001	9.72988e-09	0.0164985
finSkqVEpJY937nj8A	SDCBP2	0.47211	0.102405	4.61022	9.72885e-06	0.108845
6UWSSUSkiihihh6g1w	WASH3P	0.385978	0.0333468	11.5747	9.72779e-12	0.0583769
cS.0j7p1KX7v3T8LJE	ST8SIA4	0.185718	0.0245006	7.58013	9.72751e-09	0.0387647
6iroOju.pnk6jeuVd8	LAPTM4B	2.97202	0.0549541	54.0819	9.72288e-25	0.131803
EQiIRdQfYQIvRSEl7o	PRKCB	0.45852	0.0148799	30.8147	9.7197e-20	0.0464768
HkD7UFRVdBOKp9T.e4	AHNAK	1.49513	0.12916	11.5758	9.71114e-12	0.103081
6eoNIoOqSJ6k9KF_KE	VWA1	0.203771	0.0441918	4.61105	9.70724e-06	0.0681285
NpXiUkjQkDtzf5k6vs	COPG2	0.234821	0.0509248	4.61114	9.70501e-06	0.0450488
EW6rxUWU6SUA75_OuA	AASS	0.480262	0.0546931	8.78105	9.70138e-10	0.101677
Zoq6KiyoLrX.EIP_OQ	TMEM30A	0.165799	0.030094	5.50938	9.69798e-07	0.0372403
NVQhcKv83XVfgzq6d4	P2RX7	0.556654	0.042157	13.2043	9.69421e-13	0.0778251
0uNJKi.P4oTS0X_q_U	EML4	0.485902	0.0198964	24.4216	9.69283e-18	0.045669
rrgiHkXH97oqErz4BA	CYP20A1	0.106025	0.0139838	7.58198	9.69125e-09	0.0310475
TThQRqghCmgqnpw7ks	ARMC9	0.171377	0.0371607	4.61179	9.688e-06	0.0633725
uFCNkUeT1JcJDImIdU	SMIM14	1.20194	0.0310532	38.7058	9.6705e-22	0.0710379
KQlEgFSTtXtEN06kX4	COQ9	0.0920471	0.0091048	10.1097	9.66919e-11	0.0224244
TviuruMt9K5Lm9PRwY	BTBD3	1.1681	0.0241234	48.4216	9.66895e-24	0.11591
0rv53XCJfTkRV4FGKA	PGRMC1	0.142256	0.0073974	19.2306	9.66493e-16	0.0239699
TnRtV456wXgIxhPniU	DYRK2	0.567207	0.0184018	30.8235	9.66431e-20	0.0603677
Q96UE39x45.v_Ps754	LARP1B	0.187715	0.0495285	3.79003	9.66392e-05	0.0685405
Tv67vVkBVf7nuqesnQ	ABCC5	0.251571	0.0387212	6.49698	9.66227e-08	0.0599161
3UIToHu90KvO6pup3U	APMAP	0.124145	0.019108	6.49703	9.66121e-08	0.0312585
oSqUQ6LW9eTyeXQdQ4	PTRH1	0.117498	0.031001	3.79014	9.66098e-05	0.0384897
fcXnTlKINTB5cil6pU	BRPF1	0.056801	0.0149863	3.79019	9.65947e-05	0.0278914
TvoIjrjqXqb.vvrfbk	RNASE4	0.301368	0.0795119	3.79022	9.65857e-05	0.0771471
l5R4X.i7p.gSgf0FJI	HSD17B7P2	0.17091	0.0310105	5.51134	9.65148e-07	0.0477381
lp7OhH59TVP9eff6vk	ZNF627	0.201612	0.0265836	7.58408	9.65035e-09	0.0456891
NGrUu7n6bv9KikiAp0	SNORA10	0.16527	0.029985	5.51175	9.6418e-07	0.0415919
TI6R6HZbzfiiUongOk	MORC2-AS1	0.570688	0.0296719	19.2332	9.63944e-16	0.0761327
inLn3AL51ckeIrurKw	LSM8	0.0908925	0.0103466	8.78478	9.63542e-10	0.0282633
KU6Ur5couq1HjgCK78	P3H2	11.4477	0.0579683	197.482	9.63456e-37	0.237021
iqkL.ZwRRCrd6VDi6I	SNORA62	0.358726	0.0408346	8.78484	9.63441e-10	0.0596513
fXN7ioOiRK5LyOe99c	PDCD6	0.0508378	0.00338618	15.0133	9.63362e-14	0.0128033
KOeNdWen1ISF6h_ktM	ATOX1	0.178578	0.0274805	6.49833	9.63317e-08	0.0272309
rnfjVj9ORJXksKJUgo	TPST1	0.621977	0.0254599	24.4297	9.63001e-18	0.0779277
xQapRN7Tt92hAs066I	CLDN10	2.39109	0.0493707	48.4314	9.62844e-24	0.204562
ol9ui.hDisSkqknZjk	SNRPA	0.0640839	0.0116254	5.5124	9.62661e-07	0.0206325
Qe0WCUoJVv7Cbu_658	H2AFY	0.0572518	0.00880968	6.49873	9.62469e-08	0.0129077
6MUoffJ0s03V9OwkkY	CCDC14	0.156888	0.0340003	4.6143	9.62289e-06	0.0302733
x0bgeXU4_wn14pdVJw	LINC00092	0.11639	0.0306975	3.79151	9.62227e-05	0.0473469
NateJLikjswwyld_gQ	SNRPA1	0.0720352	0.011084	6.49904	9.61801e-08	0.0155015
Tefp3cROk.SrMI7JP0	SNX4	0.0661075	0.0143259	4.61455	9.6166e-06	0.0204623
KeO7d0SfgCXiEnt_4o	HLA-B	0.0577475	0.0125142	4.61456	9.61625e-06	0.0134818
ZrKv0fKLCBLVS1JJRU	SF1	0.201974	0.0532654	3.79184	9.61308e-05	0.0714116
cmREUEUpNxOpIUHTLo	TRA2A	0.137242	0.0248931	5.51327	9.60616e-07	0.0302177
WAcOLv5u679zmJFT3Q	GOLIM4	1.48365	0.0342449	43.3248	9.60217e-23	0.0998892
KhHni6ISJ5qtU3oR8c	ZGPAT	0.113272	0.0174269	6.49982	9.60132e-08	0.0255116
WlF1W79QtJ.XkIIDXo	FOXM1	0.124086	0.0268865	4.61519	9.59995e-06	0.034862
3zSS37vJHqwn8PtXyU	RAP2A	0.210536	0.0123717	17.0175	9.59961e-15	0.030762
NK9s_ee6KV3k76VLfQ	INTS4	0.095823	0.0252664	3.7925	9.59457e-05	0.0426114
fpfV7SCqvukAlE8Qnk	GRN	0.511573	0.0186243	27.468	9.59237e-19	0.0478742
iLe0X4lqYme6lCSq_Q	ATP5G1	0.671252	0.0663648	10.1146	9.59207e-11	0.0765248
ioLYjh.jT6wfqXqUhA	KANK1	0.998097	0.0986778	10.1147	9.59019e-11	0.140652
HonqnQVHv.Cj_Z8fuk	BCAT1	1.64575	0.059914	27.4685	9.58902e-19	0.0812164
lSy3hs.Vfe1XLCVL54	BUB3	0.0713045	0.00939791	7.58727	9.5883e-09	0.0145272
E0S1flzu6SLtUlI7uU	CD84	0.211723	0.03257	6.50055	9.58587e-08	0.0546887
W6hLuusUoICKPoClLE	ARFIP1	0.0743102	0.00979376	7.5875	9.58387e-09	0.0240196
HYfQIqcXohLpp884ok	IL32	3.35294	0.0554917	60.4224	9.58264e-26	0.119654
T1exN70bn7tSu4fsB4	CD99L2	0.206661	0.00952208	21.7033	9.57554e-17	0.0286204
lJKJ.uJ5KTpjrmXvUQ	B3GNTL1	0.209499	0.0379897	5.51463	9.57401e-07	0.0638888
foshZXXYEkSpcZFfzA	RAD54B	0.214922	0.056659	3.79325	9.57365e-05	0.0628629
c7XeqIK5TrfK7e5VKE	MYD88	0.184322	0.048591	3.79334	9.57126e-05	0.0401698
912hWIFYA_UKFTXo00	PITRM1	0.719532	0.0148524	48.4455	9.57075e-24	0.0642916
9ioTS59d9RUPVUZr1M	TNK2	0.688976	0.0199261	34.5767	9.56839e-21	0.0549184
WihIT5WgHS3Pz30n5U	TACSTD2	6.38879	0.0614091	104.037	9.56493e-31	0.289117
EnoqZ7T7c0nsdXDtd4	TMEM39B	0.0529887	0.0114779	4.61658	9.56429e-06	0.0211315
HPuot1m1Z2eoiKxd18	MATR3	0.224367	0.0591436	3.7936	9.56392e-05	0.0654283
r55UN9FJ9IDeF.ljnk	UPF2	0.042626	0.00421346	10.1166	9.55996e-11	0.0123858
lgJQXEMcZcqREpSVS0	PSMC3	0.0712327	0.0187761	3.79379	9.5587e-05	0.018965
B1eogKZ4m6Tkrt.nu8	GTF2E2	0.0612584	0.0132684	4.61688	9.5567e-06	0.0157409
uVSKiL_7U6u83eOkHU	MDH1	0.067698	0.00584267	11.5868	9.55288e-12	0.01337
clX.OKO4y_eQOKrxI4	SPRY2	5.26881	0.0329947	159.686	9.55135e-35	0.179086
NS4l9kjnojXqvref7s	TMEM42	0.0937395	0.0203024	4.61716	9.54951e-06	0.0284723
r0u3DRKFP3itRO6d10	TMEM170B	0.227954	0.0172485	13.2159	9.5442e-13	0.0418491
fk1EX_OkOSPrJK9TKY	DPY19L1	0.758865	0.0156621	48.4523	9.54261e-24	0.0735748
Q0akKULqOXoOJ4CofU	DBI	0.0414562	0.0109255	3.79444	9.54045e-05	0.0114548
QCWSYU.SMW1ElKFniA	CHST10	0.280821	0.0277547	10.118	9.53869e-11	0.0604166
KXlXe.WOK7Gji4XkcI	WDR5	0.0739509	0.0134061	5.5162	9.53745e-07	0.0276997
xsk3bRlJHZdXFDh0Xg	BCAT2	0.105166	0.0227746	4.61768	9.53604e-06	0.0272416
ZqJ0KryTi4gTfV4Hds	ZNF114	0.206194	0.0446527	4.61773	9.53488e-06	0.0685064
ubvYRJZ3e17AyoHAp4	CAMSAP1	0.0802725	0.0173832	4.61783	9.53236e-06	0.0267019
foiFSC71NeJj96Ekug	CYP2R1	0.196691	0.0518311	3.79485	9.52915e-05	0.0476782
0lKXO_iovAxe5NUkmg	DUSP22	0.278787	0.0210928	13.2172	9.52743e-13	0.0436621
olIMw7kpDbo7d4QLu0	DEK	0.166762	0.0256422	6.50342	9.52466e-08	0.0252302
QnimrgNF4rTi9CFJeE	RHBDL2	0.567837	0.102927	5.51688	9.52158e-07	0.0765086
r_nlt6Wp3TrH13uB7s	PRKCD	0.114802	0.00764163	15.0233	9.51814e-14	0.0199949
TA.PgXqKaK_y4lCtmU	C8orf37	0.27249	0.0717971	3.79528	9.5171e-05	0.0329292
B.SPu9dVKJKgXu6SuU	SYNE2	0.808869	0.0233872	34.586	9.51604e-21	0.0962295
ZeTrN5HSS.EXnKu9Ao	SNORA8	0.257323	0.0395647	6.50387	9.51531e-08	0.0523819
o7SWQwEglIJXerpXSs	LRCH4	0.110138	0.0199626	5.51719	9.51438e-07	0.0251262
xnkEUS.NPoXoquuBcE	GABPB1	0.128663	0.0338976	3.79563	9.50744e-05	0.038862
3XfUx6yOYD83uTgKtE	NRCAM	7.44914	0.0419264	177.672	9.50713e-36	0.290757
ToSXz7j4Dn7K97lD.U	SS18	0.0921424	0.0242753	3.79573	9.50481e-05	0.0231391
TlLDb.70jIruisiUlU	WDYHV1	0.140196	0.025407	5.518	9.49544e-07	0.0333118
QFGu3onotXpXeUj.r8	DSG2	0.435688	0.0495493	8.79301	9.49189e-10	0.0784308
ZX0RVdEh1_7UGoMoIM	OXLD1	0.171452	0.0225822	7.59233	9.49103e-09	0.0275214
fXO6I_yCOreuN601BI	ZBTB8A	0.428649	0.0487475	8.79327	9.4874e-10	0.0934814
uy9WuHtkl3vld4fkjk	ZNF682	0.504964	0.0498912	10.1213	9.48658e-11	0.0917808
W4pIkIavdFXh96KfV8	NARFL	0.12921	0.0279695	4.61968	9.48514e-06	0.0430813
u2qF1AhwHhCX0KJUqs	TARDBP	0.173394	0.0456716	3.79654	9.48226e-05	0.0472238
3lC1xSzXeF3uUDRn3o	TGM5	0.367493	0.0795476	4.6198	9.48221e-06	0.0961397
E0LNfvhGlOFH9VupTo	HMOX1	0.542013	0.0833128	6.50576	9.47536e-08	0.0772171
BSgrNJeuhjN3Y7dkuE	LMBRD2	0.130749	0.0236913	5.51887	9.47528e-07	0.0454183
ooufegc0lR_FFS.ugk	DUT	0.256926	0.0394916	6.50585	9.47345e-08	0.0426335
EWe_.zqC27TXKr6p6k	PDE4A	0.317997	0.0240511	13.2217	9.46954e-13	0.0691824
KquSiX96P6O6c6AgRI	COX7A2L	0.0989673	0.0179317	5.51912	9.46936e-07	0.0196334
rh0PXeJLjr3kuunheY	HENMT1	0.780626	0.0359469	21.7161	9.46764e-17	0.0739411
iukKCAu9Yk2uncGUEk	SSFA2	0.456786	0.0303954	15.0281	9.46261e-14	0.0762905
iTgJE79LlHRMILlaUo	PREPL	0.162153	0.0350926	4.62073	9.45854e-06	0.0390792
Bf3tFEiPpca.e.4q54	DTNA	0.627545	0.036846	17.0316	9.45331e-15	0.106074
Te_l.fJf.e.U9LnUJk	POLE3	0.134379	0.0152782	8.79547	9.44931e-10	0.0219308
ZkINSxfkTILJBU1flw	PPP1R3C	0.526548	0.113944	4.6211	9.44903e-06	0.115307
BTkXEdSXq4SpSHe4AA	ANKRD30B	0.190353	0.0411915	4.62117	9.44729e-06	0.0298638
iKIIOVr5IKJ6qO5KlE	SPECC1	0.308583	0.0474217	6.50722	9.44448e-08	0.0730405
311__vni6mlCqIAolk	TP53I13	0.321356	0.0277161	11.5946	9.44339e-12	0.0401021
ulIdet.UvyAKd7lCio	SYVN1	0.353324	0.0542958	6.50739	9.44101e-08	0.0406001
xkuLp7.eUTogE63kuI	ZNF84	0.275766	0.0363074	7.5953	9.43437e-09	0.0589348
QSiVH3hMHBUReIwaTw	FDX1	0.185265	0.0335578	5.52079	9.43093e-07	0.0596214
f_JnRXubpfucFPJHk0	RP2	0.212405	0.0559195	3.79841	9.43086e-05	0.0608349
fllCHnhJ6Ia96.Qcaw	TBC1D2B	0.184068	0.0158739	11.5956	9.42868e-12	0.0353949
x54gQFReJFUhF9dBUo	LST1	0.604551	0.0247198	24.4562	9.42828e-18	0.0901497
lWe.yrIR4Qbzu638F4	EED	0.184193	0.0242496	7.5957	9.42673e-09	0.054248
6LvpAYh.delXl56I0k	BLCAP	0.171816	0.0264005	6.50808	9.42647e-08	0.0370148
BSseigiIIpOEnBKhqc	MAN2B2	0.237951	0.0179923	13.2252	9.4259e-13	0.0331449
ujaFNp3qg164My55zs	CHEK1	0.143542	0.0310559	4.62204	9.42523e-06	0.0310183
rOezhdXiRW4eVTn9V8	RANGAP1	0.0713422	0.018781	3.79864	9.42446e-05	0.0191971
opD.CjABwT6UpGunRk	PHAX	0.268148	0.0705846	3.79895	9.41584e-05	0.0689102
oNQKXoEQ6x0AEyeXao	PYGL	1.04299	0.0240508	43.3661	9.41573e-23	0.102044
HI7XSGoK.iCrSOspqU	CCDC97	0.0785452	0.014225	5.52163	9.41155e-07	0.0241734
uu42IlPSAIfX_70lzE	SLC39A8	5.10227	0.0941948	54.1672	9.40847e-25	0.220521
9uepaotXt3RJNySzzw	IKBKB	0.0672148	0.0121727	5.52177	9.40819e-07	0.0212891
ulT0A438W6XlU5861U	DHRS9	6.70194	0.0798905	83.8891	9.4063e-29	0.211686
6R7vUWkOAIvfv.XUkM	RPL23AP53	0.15795	0.0155976	10.1265	9.4054e-11	0.0417118
6D7o3VXlT5efiqRRx0	HDAC6	0.0779649	0.0141187	5.52212	9.40026e-07	0.0278963
xu.jfK3TjeLkxXdSgo	UPF3B	0.0617684	0.013361	4.62305	9.39989e-06	0.018688
KowqTEZ512f375WH2w	EIF2S2	0.205831	0.0541715	3.79961	9.3978e-05	0.0599929
ckIk_Hqk16e30XueIk	PDCD2	0.0692134	0.00683454	10.127	9.39775e-11	0.0174016
uJ6tZVpdIvmQwO8WFM	CCDC151	2.00377	0.172762	11.5984	9.38917e-12	0.134362
K8C6STfuqU1LE1QeJ4	EIF3M	0.0395066	0.00854475	4.62349	9.38869e-06	0.0119693
3_IUl6uESQhVN1EBv8	RAX2	0.437986	0.0793053	5.52278	9.38505e-07	0.0658375
uvt0HX6xKvT0BVQnuI	ITGA1	0.946946	0.107615	8.79937	9.38231e-10	0.141924
TGSoW.8DRKpu7SXlco	LBH	0.300936	0.0462233	6.51047	9.37645e-08	0.0732392
xolKAjS7g_6EVN20wo	CEP152	0.17131	0.0129494	13.2292	9.37512e-13	0.0337165
lofUF_Hnidenyffq9c	DDX18	0.0885546	0.00588957	15.0358	9.37452e-14	0.0182552
ZkRV5uweT1BRwwLlz4	SLC44A2	0.468216	0.0170261	27.4999	9.37447e-19	0.0418588
cynKnfL.T1z5VCz7QE	CCNG2	0.440148	0.0951849	4.62414	9.37251e-06	0.066315
QCjrVJ7tAKCfv7DG7k	RSU1	0.328899	0.0170751	19.2618	9.37177e-16	0.0437223
HVRS77RKnO_fArLenk	HMGXB4	0.0931158	0.0201363	4.62429	9.36877e-06	0.0290103
WIJKApNIILBL6SKt0o	AS3MT	0.283753	0.0746577	3.80072	9.36738e-05	0.0848701
ZpO5egcWLKJT9.sVeU	CCNY	0.14438	0.0379872	3.80075	9.36677e-05	0.0323234
BnaDuFKSokuE6CSM6U	PHF14	0.14339	0.0188699	7.59887	9.36672e-09	0.0320921
i65p6U6ICeH6eu6xIg	MAT2A	0.11981	0.031522	3.80085	9.36408e-05	0.0226737
cDDJSm66ROXs9Unn6g	POFUT1	0.455936	0.0825407	5.52378	9.36216e-07	0.0428173
KDiAaSZYSiaaSOCa8w	TMEM208	0.199474	0.0196926	10.1294	9.36068e-11	0.0353297
TdRf7_R3vl7iif3pO4	ZAK	0.992901	0.0164142	60.4903	9.35982e-26	0.0717653
cruommbTsRTRQqlSQk	FAM195A	0.160596	0.0290723	5.52402	9.35667e-07	0.0343281
cHu1RDSAXW_6SKpfRY	TNPO3	0.252365	0.0332075	7.59964	9.35212e-09	0.0400567
ovWQcXE_.jXTgJJHp4	SNORD34	0.133381	0.035086	3.80153	9.34543e-05	0.0491932
oRR6CRSTB7ihX1Ae6k	ZNF438	0.0573481	0.0103806	5.52453	9.34502e-07	0.0308811
NpeKFKCyJJK5ICJ6BI	SFI1	0.278595	0.036656	7.60026	9.34047e-09	0.0641765
c9PSir.9NS5RJ0qB1o	FAM210A	0.192828	0.0253709	7.60035	9.33886e-09	0.0395362
xg3S30l5Hj_yXke3x4	AKTIP	0.0754128	0.0163037	4.62549	9.33855e-06	0.0234339
3SJ_qf3p530_F7u9Uk	USP36	0.694773	0.0525061	13.2322	9.33701e-13	0.0776158
x99U7IX0kAlrH6CUSk	PHLPP2	0.0924405	0.0199847	4.62556	9.33676e-06	0.0330533
xg0fiXqA6K_S4liPmU	PNPT1	0.424171	0.0916991	4.62568	9.33378e-06	0.0458373
ltevVv3UXIewF3YqSo	CDKN1A	0.252325	0.0217474	11.6025	9.33241e-12	0.0251276
KSlWkkecfqKJR9F.s8	AKIRIN1	0.23572	0.0426632	5.52514	9.33102e-07	0.0435092
uMWn1IhV.3UlM8TSnI	RHOQ	0.397177	0.0718852	5.52515	9.33078e-07	0.0445847
0J6bK6S_peuKvKH0gE	B4GALT7	0.143991	0.0189439	7.60088	9.32886e-09	0.0296777
iF56_ZIxcp_1P85P0k	SRSF7	0.125378	0.0123745	10.1319	9.32194e-11	0.024751
9uRN57lK_CzLoFTSyw	MZT1	0.182214	0.0074461	24.4711	9.31635e-18	0.0283833
E6HW0QzrKM1dFB1YR0	HIBADH	0.120906	0.00913596	13.2341	9.31413e-13	0.0247625
QEZVcR5WUU.5EeXvRM	EVI5L	0.448	0.0262827	17.0454	9.31153e-15	0.0532252
fJSk5BI.7k4DiH1.S4	CCPG1	0.199053	0.0523413	3.80298	9.306e-05	0.0702155
QKj8ld5XCuU_AKhKFc	AGAP3	0.195106	0.0299523	6.51389	9.30561e-08	0.0440614
0pYPku3U0kv53U6kRg	SNORD89	0.848229	0.0640881	13.2354	9.29788e-13	0.0844138
ERl1up1PeyT5Sb3fRs	ZBED1	0.190747	0.00877542	21.7365	9.29735e-17	0.027364
cjl6QBRdXuURIRHKXs	RILPL2	0.428938	0.0324079	13.2356	9.29457e-13	0.0426013
lcOO8SHxsxX7MXqEqc	GAS2	2.90024	0.0597803	48.515	9.2905e-24	0.133616
6TTnqoj3SEdjo1FRPQ	APOBEC3G	0.174002	0.014993	11.6056	9.29009e-12	0.0264809
uzp51JVH3yT3x133qk	CAMK2G	0.196303	0.0148308	13.2362	9.28774e-13	0.0414427
irtPvV.eDyexMwl9f4	RMI1	0.114958	0.0176453	6.51491	9.2844e-08	0.0262992
lKUJ__nTlzLVJH_opQ	ZNF14	0.65685	0.141939	4.62771	9.28328e-06	0.0542829
lDihIgXSu985y5_eLk	SWAP70	0.201922	0.0173978	11.6062	9.28205e-12	0.0267842
NUongoVQ4o4lATWLnU	DEF8	0.279335	0.050537	5.52734	9.28097e-07	0.0566886
cUr8U3R1SwxUnXNwJU	SMG7	0.157944	0.0155845	10.1347	9.27987e-11	0.0300795
oqJ2QMdf_vz3xRfn3s	CD86	0.851349	0.0391627	21.7387	9.27903e-17	0.0791192
Q6KC9xHZdFBJYRriFE	FZD2	0.530162	0.0813712	6.51535	9.27539e-08	0.109433
KDpXnu0v1e6X.gexN0	AKAP8	0.105958	0.0191687	5.52768	9.27326e-07	0.0317702
fn9CiKQYgL6SgLhlNU	SAT2	0.151217	0.0198865	7.60404	9.26959e-09	0.0321994
9SlQ9T7jvxfzJSuLks	KIF1BP	0.102339	0.0134585	7.60409	9.26879e-09	0.0266891
xqn6O_R5VHl7V96wDA	FLOT2	1.00891	0.0149408	67.5275	9.26688e-27	0.0552574
KOLe.fsOnhSPgler7k	GRM8	2.05741	0.0273193	75.31	9.26359e-28	0.132768
T7mopoaqkiEQwA9WtA	ETV2	0.377326	0.042846	8.80657	9.26006e-10	0.0796322
Z6hXT6N694ooRF6TaM	RPF2	0.0644497	0.0169394	3.80473	9.25869e-05	0.0171222
c_gKVfo9enqhDjhehU	NPRL3	0.159364	0.0344294	4.62873	9.25792e-06	0.0531066
xKpnfhHuX0.1JUSXq0	TYSND1	0.0987527	0.0178627	5.52843	9.25615e-07	0.0229804
cJSqpSF_9O7q3t9fOU	ZNF641	0.122553	0.0264758	4.62887	9.25436e-06	0.0528857
lpFSH_eX98TjUpUgVA	SNHG1	0.114408	0.0150437	7.60501	9.25156e-09	0.0216424
cumUIGBe.BJ7BQ6x40	MTDH	0.101654	0.021959	4.62926	9.24484e-06	0.020741
Qp9WAlX7nu6IXQ7pE4	APEX1	0.107326	0.0121857	8.80753	9.24373e-10	0.0206209
cjqO7E76s1xx.u.03U	GFPT1	0.113168	0.0173649	6.51705	9.24033e-08	0.0231005
0TqgqgKoOnn.jO9XhE	SLAMF7	0.59216	0.024188	24.4815	9.23928e-18	0.0555675
3h7Sgq2i3sAUkxL_n8	ITGB5	4.09514	0.0606354	67.5371	9.2391e-27	0.224463
HJyl3jTIJIyfS1S3KU	CSRNP2	0.157605	0.0340433	4.62955	9.2376e-06	0.048312
xKf56fuaTXnW3kr7n0	ATP5I	0.100573	0.0217238	4.62962	9.23588e-06	0.0255535
xWCCvpXlABeP0h9yVU	LOC728178	0.19413	0.0510115	3.80561	9.23502e-05	0.0646442
ZHhO7uXi5SUW7gd.oo	ERN1	0.655271	0.118506	5.52945	9.23324e-07	0.070757
N3eSRj93.jDlfypEHI	ZFAND6	0.411563	0.0744309	5.52947	9.23282e-07	0.0638945
lbn6r0nrintXsoICd4	ANXA2	0.142336	0.0307437	4.62977	9.23211e-06	0.051625
9zfU9dleVUilKJ3lfg	IFITM2	0.976174	0.0448929	21.7445	9.23157e-17	0.0552713
TXiwenn0o0n5It_f8o	ANKRD46	0.133287	0.0151318	8.80845	9.22835e-10	0.0314496
oX0ScI5TuSuj1OWSE4	EZR	0.0368624	0.00565578	6.51764	9.22825e-08	0.010099
fui6qfUrpX1aRE9T_8	SMARCB1	0.267058	0.0156599	17.0537	9.228e-15	0.0360482
TR7dIiv9e52V793Sgk	CECR1	1.33263	0.0306992	43.4091	9.2257e-23	0.0801536
uYd0KR7s5XkL6e3OJM	TMCO1	0.141852	0.0139917	10.1383	9.22406e-11	0.0221186
Tpzgse6SJ57.eCuIJQ	CIPC	0.174204	0.00801098	21.7457	9.22228e-17	0.0312493
E2l71SHaX0XV9117vw	ASB16	0.663965	0.0753719	8.80918	9.21605e-10	0.112273
oudu78lxv.dOXU8Uvk	FUBP3	0.0547519	0.00990046	5.53024	9.21537e-07	0.0172557
Zo3ErTflXgOlegJzp4	VLDLR-AS1	0.351481	0.053922	6.51831	9.2145e-08	0.0855497
6R7R.SJ2unRJu15Vr8	GNA15	1.89651	0.0488815	38.798	9.21196e-22	0.092273
WkSBLsV8uFL5xUJPuU	NCKAP1	0.432249	0.0568211	7.6072	9.21089e-09	0.0875688
HRHnqE6SofRLqr.yek	PARD6A	0.219807	0.0288945	7.60723	9.21026e-09	0.0440915
0e76KSeYS9HfepO8Pk	BEND4	1.25409	0.0288875	43.413	9.2088e-23	0.110987
EeoKhN73_uw3dOuA3k	GNE	0.0946455	0.0204385	4.63075	9.20788e-06	0.026455
TpBA4C7STfy9JNfp7o	MSMO1	0.37965	0.0582406	6.51865	9.20753e-08	0.0478585
3STtKUo88qI9dgHLu4	MRPL35	0.14803	0.0267652	5.53068	9.20537e-07	0.0377909
EbBFAwVVILJSKUv4E0	MGME1	0.0981679	0.0150593	6.51877	9.20516e-08	0.0235763
Kev706Oz3CJ4gSpehE	VPS36	0.703347	0.0412372	17.0561	9.20322e-15	0.0691219
KRFX.U.CFece7giOMc	KCNMB2	0.462148	0.0524538	8.81056	9.19283e-10	0.0960332
fcp9ebuwC2Kz56T0q4	SPIRE1	2.12878	0.016477	129.197	9.18827e-33	0.124832
TeclJVJX.SVCiE6CAE	RAD17	0.137154	0.0210369	6.5197	9.18616e-08	0.0382917
HXXnFLJv_FReUu.n50	TCEAL2	2.44779	0.0999498	24.4902	9.17563e-18	0.220274
9op4popKPn4zioj4p4	ZNF526	0.258962	0.0680068	3.80788	9.17404e-05	0.0561998
TXnJSVSV.0lQohOggA	RAD17	0.112061	0.0241918	4.63217	9.17298e-06	0.0347234
6_RziXMhzS9X_po__8	HPRT1	0.0948318	0.0249034	3.80799	9.17114e-05	0.0197255
WB9gp8OO0U.cXlGzaY	PMS2P5	0.280608	0.0164489	17.0594	9.17053e-15	0.0448017
ui8QkUqjncTQqORfS0	AQP9	2.36577	0.0544833	43.4218	9.17045e-23	0.167862
NSdbVSZ0674B7e05FE	EVL	0.30716	0.0125418	24.4909	9.17004e-18	0.0290717
rWIci0TXhEHfteu5yI	SNORA45B	0.622236	0.0613502	10.1424	9.16292e-11	0.0791257
NXuX5S6j1_7t07erU4	TP53BP1	0.0811692	0.0124476	6.52087	9.16239e-08	0.0244205
QV130T1VYVQJSICUjo	LZTS2	0.159193	0.041801	3.80835	9.16153e-05	0.0613655
o6gqbp3gN7RpPfRunk	EIF4G3	0.16739	0.0302548	5.53267	9.16087e-07	0.0318949
QFr15IPifSe8e.4JZ4	RPRD2	0.114583	0.0175715	6.52097	9.1603e-08	0.0294473
rnX.J5Gl7fyuUu45Fo	EXOC3	0.0888766	0.023335	3.80872	9.1518e-05	0.0294202
Z_jed10kNIJ_Ad6F6k	NLRP7	1.41083	0.0575982	24.4943	9.14532e-18	0.157721
ZqbssL7IKdiqG6Hz_U	NET1	0.193884	0.0128766	15.057	9.13722e-14	0.0318025
ZoOoiqC36SoDV.6URI	ATP8B2	0.594428	0.0122425	48.5546	9.13504e-24	0.0620958
Ko9d7uro5u6kYf7HSA	HES5	1.02537	0.0331723	30.9105	9.13406e-20	0.123016
xqk3l6LxfU06cXnuv4	ZBP1	1.94789	0.0562059	34.6564	9.13298e-21	0.115011
EbcWekKI5WUAJ3gofk	PTGR1	3.0597	0.0263548	116.096	9.13009e-32	0.144215
NuhfT1PnqWXvXUYQJE	SOS1	0.181786	0.0278704	6.52254	9.12834e-08	0.0564496
okgunnI3d1.FFOSgSE	VEZT	0.168456	0.0191113	8.81448	9.12749e-10	0.0305554
KlNYvHTiFLlTgrSHik	UCHL3	0.0904287	0.019514	4.63405	9.12683e-06	0.022942
HuTfddOp686_i_eoe0	C3orf38	0.0441945	0.00953676	4.63412	9.12517e-06	0.0178115
oZ79tAkYqWXul8PXBo	NBEAL2	0.212323	0.0325509	6.52281	9.12283e-08	0.0421762
0pQq7VE9UEWV3jRTqA	ROGDI	0.196315	0.0300953	6.52309	9.11713e-08	0.0622207
rpUbpNjXV5WYLhL8QA	ACTN1	4.72489	0.069915	67.5804	9.11507e-27	0.171543
NcIKgflNCPXsUpUaW0	SIN3B	0.0587967	0.0126863	4.63466	9.11209e-06	0.0305899
oVFD92hH3S7ugnTupU	MUC1	0.317767	0.083398	3.81024	9.11127e-05	0.0870774
Zn2Iv_F5eCJFI_RN1U	PTTG3P	0.169952	0.0167508	10.1459	9.10954e-11	0.025317
Qr_XT3UIlEHQnge4C4	FBXW7	0.324787	0.0168364	19.2908	9.10873e-16	0.0369098
BoR4ipDf5fzd4pzoq0	CDK4	0.128568	0.0277395	4.63485	9.10738e-06	0.0242197
BVgkvnlKcISxAhukCU	AK4	1.01786	0.133703	7.61287	9.10633e-09	0.0952779
3qW8p3QThzIhVu00aI	DDX11	0.140481	0.0215329	6.52402	9.09842e-08	0.0412826
uSRUkTKE7__Hg5s3c0	LARP6	4.23315	0.0698862	60.5721	9.09835e-26	0.250567
Nr1NDriRSXg5IJnUs0	CSE1L	0.117656	0.0253829	4.63524	9.09784e-06	0.0224796
BUp.XnUXiMFB1dWw0o	SHMT1	0.317822	0.0164741	19.2922	9.0965e-16	0.0409273
Z5akqeiehIJS5fwtP4	MVB12A	0.0855212	0.0112328	7.61355	9.09385e-09	0.0229392
x4oS9Ioo9IYu2ebi6U	LTBP3	0.176538	0.0463242	3.81091	9.0935e-05	0.0586126
TC7Vlk3X0mYlFj7EsA	PTS	0.123855	0.0324977	3.81118	9.08635e-05	0.0396355
i5LJNfsTsnKIH7HCVI	DHRS4-AS1	0.175182	0.0230081	7.61396	9.08626e-09	0.0473382
Ep7FbYOi.43Z4v6L6o	ZNF419	0.137329	0.0210477	6.52467	9.08522e-08	0.0323228
6eoV0IoMUfO8R15HAo	HECW2	6.97596	0.0484923	143.857	9.08346e-34	0.240026
cuJRM_ovcj_Lg6SgKk	TRIT1	0.255361	0.0251644	10.1477	9.08235e-11	0.0383312
Bhkvq.dMLNcvTsTWDk	MTPN	0.144345	0.0163707	8.81729	9.0808e-10	0.0213472
oBxen_okdRRzqTeirU	MOGS	0.142384	0.0257173	5.5365	9.0755e-07	0.0407521
NiSbvSojRJdd5TdTXQ	SNX29P2	0.377713	0.0496039	7.61458	9.07498e-09	0.0665918
KVKklX_6VKMNBHvd3s	RGS16	1.06797	0.0805803	13.2535	9.07482e-13	0.0906709
NB0n6ve5113fXMgR7k	IFT57	0.188284	0.0247262	7.61477	9.07152e-09	0.0572545
oiqXFSCXX4FLeQV53M	LZTR1	0.0555506	0.0119811	4.63653	9.0666e-06	0.0175665
QXrTXDDqOKgv1JI.Sk	CD2AP	0.0873874	0.0157826	5.53695	9.06544e-07	0.0270512
xIp4p7rnhHnpj85J6U	GPAA1	0.196399	0.0193516	10.149	9.06406e-11	0.0435028
QQ4tXoGUjm4DoIgf5Y	VIM	1.6614	0.0973279	17.0701	9.06389e-15	0.0683265
rhdeendlRQULvEJVIM	SRM	0.154802	0.0406075	3.81216	9.06049e-05	0.0325991
960K2Qn564AoVRgu_g	HPRT1	0.126239	0.0272251	4.63685	9.05881e-06	0.0242629
3ep7rP6uN.E99IdO7s	IRAK3	1.34553	0.0222088	60.5852	9.05704e-26	0.0990592
9HH0g1JJ3V0k1fApUE	INTS12	0.0950646	0.0107798	8.81875	9.05682e-10	0.0203131
KYiXiWoXopFIr0oicQ	BAG6	0.144489	0.0189727	7.61561	9.05626e-09	0.0312783
Hnle6t_dDHvTF6IiCs	TTC31	0.0405362	0.0106328	3.81238	9.05486e-05	0.0191784
uikKhU1ylZ.fliUJJ8	ZFYVE27	0.0932217	0.0244513	3.81255	9.05025e-05	0.0412735
EhSABCutGFUl9O5iGk	C21orf33	0.138802	0.0212675	6.52646	9.04916e-08	0.0374302
iJJewHoBHrdJQXXSpk	SRGAP2	0.190205	0.0410157	4.63736	9.04641e-06	0.0644097
6Kil8SHh.HwIoZtHZ4	GLTSCR1L	0.0915659	0.012022	7.61651	9.03985e-09	0.0239308
x6PY6h.qhe7Xsj2AOo	PRAMEF9	0.179203	0.046998	3.81298	9.03886e-05	0.0695651
ipWbdgqkXuB0Ap3.SI	HIST2H2AA3	2.32687	0.0535498	43.4524	9.03864e-23	0.093057
rnXl3dUE79SQsjlXu4	ASXL1	0.264253	0.015478	17.0728	9.0375e-15	0.0423428
BNFEdVUl9F6U4KF.4U	SH3BGRL3	0.0799647	0.0122512	6.52709	9.03664e-08	0.0217285
QRUS9J6e_P9HkHeX_4	RIOK1	0.0795905	0.0171608	4.63792	9.03283e-06	0.0263728
0XhG30JIIIkAEkl0n0	PTPN13	3.77079	0.0622302	60.5943	9.0286e-26	0.226147
KVTueeLpQjjlKeVzEc	SELO	0.120346	0.0184365	6.52764	9.02564e-08	0.0355966
WmgCXaXll9Rb09yJAQ	TERC	0.294801	0.0635577	4.63833	9.02304e-06	0.081584
ruiqTsoSq9w8e3uIvE	CA13	0.326859	0.0429092	7.61745	9.02278e-09	0.0783328
KdBVGQvXieBOiQqirg	NOL3	0.227988	0.0597829	3.8136	9.02276e-05	0.0632217
HTpQGxQgLajbawMahU	RPL37A	0.0615763	0.00808355	7.61749	9.02205e-09	0.0119691
rhUhIIDefVxTpz1JFU	OCRL	0.122461	0.0160759	7.61763	9.01939e-09	0.0409837
iohT6U1KA.bEngMyko	UAP1	0.392436	0.0444881	8.82115	9.01734e-10	0.0499557
B.we.lHnldFXlad6LE	NFE2L1	0.220551	0.0578294	3.81382	9.01682e-05	0.0427737
E85v9UldYNHh6pv_5U	LSM14A	0.0548872	0.00840771	6.5282	9.01441e-08	0.0155438
uVueGDdTuNu1.dTueU	SNX29	0.392952	0.0709385	5.53933	9.01282e-07	0.0802044
WnSV9cql3lf47X4nHc	PUDP	0.769008	0.010198	75.4078	9.01262e-28	0.060314
9Vu9RtOo91tFqKt_Bo	NOMO1	0.11495	0.0301388	3.81403	9.01132e-05	0.0477951
f21noCeCHtl51g.W00	LAGE3	0.115144	0.00764124	15.0687	9.00892e-14	0.0235801
HXeXV.lSl.dIez1Neo	SPRYD4	0.32246	0.0695099	4.63905	9.00558e-06	0.05895
cgXgGuolSLM4jt9Ip0	PCM1	0.0795931	0.0104475	7.61842	9.00507e-09	0.0175812
Nt6oCnXu__JeUL7q5I	SCARNA16	2.2419	0.0724763	30.9329	9.00228e-20	0.155914
991T4SiR_leXxeUJUc	AIP	0.148995	0.0168887	8.82218	9.00042e-10	0.0280604
reigUTMEfB9VxXlXVQ	NR2F2	0.323816	0.0425025	7.61876	8.999e-09	0.0786421
HC3el0wCunurbSg3mU	ZNF581	0.250489	0.0188903	13.2602	8.99345e-13	0.0326117
ZdSFUni1B4DQ5biEn4	NOL4	0.963029	0.0726235	13.2606	8.98875e-13	0.140115
QUUtJIOgnyKB_XuJno	INSIG1	0.113882	0.0129075	8.82292	8.98825e-10	0.0193812
ing5LjvNLSPf1_nS_4	USP14	0.117122	0.0307005	3.815	8.98603e-05	0.0363579
c6IkYvL7LWn5rqnh9c	BCAP31	0.068046	0.0104211	6.52963	8.98586e-08	0.0181554
NtP3xVOe9XohV7o90k	FASTKD3	0.0602964	0.0129947	4.64006	8.98123e-06	0.0216116
cXSOUqt53JNLCz8kgE	SSR1	0.102328	0.0220531	4.64007	8.98118e-06	0.0217561
HqNB7GX_s3hTAt.51k	ZMPSTE24	0.17099	0.0224399	7.6199	8.97826e-09	0.0273087
3CdSt82zV_U3gfv5Hk	AKAP7	2.01917	0.0732641	27.5602	8.97682e-19	0.145065
NUuorH4NPmuv1Xuc90	GYPE	0.718047	0.0207007	34.6871	8.97063e-21	0.0947205
9VI6FKByREXk0kAv0U	ECD	0.0514846	0.013493	3.81567	8.96862e-05	0.0203948
6txq5SNLKl7j9e0u10	FOXO3	2.15349	0.0443121	48.5982	8.96661e-24	0.119192
imM9It1UhaS006S.SY	FILIP1L	0.355509	0.0466509	7.62063	8.96518e-09	0.0735157
c1F1N9.kl6unOrH26U	MYL2	0.851017	0.0440778	19.3072	8.96336e-16	0.107052
NFqix0hPQHMV1f6CAk	GINM1	0.214925	0.0282023	7.62082	8.96166e-09	0.0431018
TlO74I4D6TS7Ia54_o	ARL5B	0.264085	0.0476526	5.54188	8.95701e-07	0.0580621
KSQ5qAnxLTVb0fYITg	ZNF426	0.157825	0.0241648	6.53119	8.95474e-08	0.0425704
QUv4FekeUbMkeSX6gI	PUS7L	0.109115	0.0196887	5.54202	8.95382e-07	0.0334489
Q_cW4BfxcjSU0l7QdI	EIF3L	0.0449672	0.00589993	7.62165	8.94686e-09	0.0106282
oKZ9UH0x6SiriivR4k	ETV4	0.536705	0.0461443	11.631	8.94554e-12	0.0857398
f3hJdCgokuXu0lOqV8	TRMT61A	0.12468	0.0326672	3.81667	8.94243e-05	0.0430739
xILrSgQ00ldd6moNIk	RIMS2	0.569995	0.0645809	8.82607	8.93685e-10	0.109121
HdFqAe4GnTrE9CP7uI	CASP6	0.25506	0.01493	17.0838	8.9299e-15	0.0431081
ujqfgjiLogjorgjlLk	HERPUD2	0.262636	0.0197984	13.2655	8.92977e-13	0.0514901
B596S6197WXl7vp5Ng	LST1	0.665565	0.0501713	13.2658	8.92544e-13	0.104685
uXekwOrwxcrji_Mrko	CTSC	0.277872	0.0425356	6.5327	8.92483e-08	0.0656658
ZVeFV6nhQDuf3HuLVw	HYOU1	0.555199	0.0546543	10.1584	8.92465e-11	0.0670463
E5fUedfzh5H3JSyd5E	PLA2G4C	2.43376	0.0786442	30.9465	8.92334e-20	0.147474
ilHJEoJ0oYKSbyiDL4	SNX29	0.815858	0.0614998	13.266	8.92319e-13	0.108248
3U8Xo7.7Ueoikn66KU	PHF2	0.0772171	0.0139294	5.54347	8.92219e-07	0.0286342
looq4jn95P344S.u9c	PRDM8	0.600025	0.03107	19.312	8.92084e-16	0.100605
f2eKp70UU1291KtCgs	TIMM22	0.741902	0.0122367	60.6292	8.9204e-26	0.0635369
finrhvSX_0MBe07mjU	GPER1	1.10399	0.0450133	24.5259	8.91748e-18	0.0744252
iNSrSUu_AiE.7cXpHk	ZMYM6	0.107218	0.0121461	8.82732	8.91651e-10	0.0221935
cX4LnsUuenkrPC1C.M	BAZ1A	0.0903643	0.0163003	5.54374	8.91647e-07	0.0207134
BkiUXXMhlT5XnnsR9I	PRELID3B	0.104236	0.0188021	5.54385	8.91408e-07	0.0245222
ouVLarp4nrXwyvv360	DAAM2	1.02004	0.0293974	34.6984	8.9118e-21	0.127686
BKn_Vf97C3fqNe7IJ4	RAB10	0.0488504	0.00747689	6.53352	8.90854e-08	0.0134288
opLIq5393IogH5SiEI	ZUFSP	0.0815592	0.010698	7.62379	8.90832e-09	0.0228641
EK.h0Lunsep0Ip9F3o	TRIM69	1.2245	0.0499234	24.5276	8.90568e-18	0.0861706
T4Hr0KZtcVLT.fxfMc	PSME3	0.172016	0.0450513	3.81822	8.90215e-05	0.035378
EqRmeR1sHQTpOX93Ww	CYFIP1	0.319191	0.0186807	17.0867	8.90171e-15	0.0453764
cyYSYSaIYqY4MYYT7o	NFKBIB	0.19243	0.0252392	7.62426	8.9e-09	0.0421356
fHhKAX1tuKiR9Uqlko	VWA1	0.362835	0.0781381	4.64351	8.8989e-06	0.0907835
QenSDz7TKdcHvXXn3I	GAPT	1.42907	0.0518295	27.5725	8.89766e-19	0.153974
33oj15BdCIfVKZ0peg	GPRC5C	1.41184	0.0826248	17.0874	8.89493e-15	0.108518
N0qXoC3fUvTSrLIXtI	MRFAP1L1	0.0452824	0.00593898	7.62461	8.89363e-09	0.0138071
WeSdsiWBqKiAIJEhAE	GFM2	0.0905226	0.0237054	3.81865	8.89121e-05	0.0423304
KWuXa0d6qS.I57gPAU	GSE1	0.158632	0.0242759	6.53453	8.88863e-08	0.0338502
9tFX0HokoaCvt7H6io	ACP2	0.8156	0.0295781	27.5745	8.88515e-19	0.0820871
0yoSKKWA1dVTn14V_8	SH2B1	0.0868617	0.0227452	3.81891	8.88435e-05	0.0377423
Boq4S6WVClRifvf738	CCR7	1.65527	0.0380619	43.489	8.88353e-23	0.068646
xlBPS3rO4pubgkIHXo	ADGRG1	0.670293	0.102572	6.53484	8.88256e-08	0.108468
9jpVlCSOeQEnAe0z54	CLPX	0.0801125	0.00688499	11.6358	8.88173e-12	0.022015
3HlR305eUB_qQ_OcDo	TICAM2	0.218528	0.0187802	11.6361	8.87839e-12	0.0408141
9RrkTnpPQTugJ_3yKk	PRKCB	0.463076	0.0133433	34.7049	8.87819e-21	0.041163
i21k654OnihfVLdVIs	MYL6	0.104706	0.013731	7.6255	8.8778e-09	0.0160985
ciRII6gR66KOgKdnQ0	BCL2	0.230715	0.0261292	8.8298	8.87637e-10	0.0322142
Qk_6e0DU7tVXut7u4Q	SLC25A1	0.110228	0.0237309	4.64492	8.86526e-06	0.0305874
TSnePcugokveLdSgsk	PNISR	0.13202	0.0345632	3.81966	8.86496e-05	0.0284619
KZG_akiZCkxFIAZ7Xs	HNRNPDL	0.212622	0.0325313	6.53593	8.86106e-08	0.0327051
KU4iO7ULzcg4BGfmqI	GCSAM	0.596004	0.0273509	21.791	8.85927e-17	0.0823704
K9jjedE9ed3Fx9_s9Y	CWF19L2	0.0321076	0.00840526	3.81994	8.85776e-05	0.0172536
BoEXXQFxR0oO.nqlgI	C5	0.148426	0.0194614	7.62671	8.85621e-09	0.0409446
iVT2u65LuALX4_9q7k	RBL2	0.148882	0.0168584	8.8313	8.85224e-10	0.0298536
KSbk7vQl8j6Y7bP9dE	TLR7	0.663344	0.0240512	27.5805	8.84681e-19	0.0527318
olk1zp3H_IasXq7Ne4	ADTRP	4.68414	0.120492	38.875	8.84681e-22	0.246253
Nk63nfuC_.jVuA3VI4	METTL25	0.25665	0.0117768	21.7929	8.84433e-17	0.0402094
rXAbK5ElJuBzCiVFdk	SGOL1	0.15427	0.0332063	4.64581	8.84427e-06	0.0409337
rSd7BdW_bQtwFCPO4c	FHL2	2.27556	0.117777	19.3209	8.84331e-16	0.127628
WiSNevh5IhF_CzqvZE	GAD1	0.527431	0.0518923	10.164	8.84313e-11	0.104387
QDCt7uARE7qrino8C4	KCTD1	0.223845	0.0481782	4.64618	8.83547e-06	0.0697027
EqVlAHqXPs3qm8SuB4	GRIA3	0.253511	0.0663491	3.82086	8.83401e-05	0.0814974
iuBoeRv7xCogjzop5M	ZNF16	0.205634	0.0370671	5.54761	8.83248e-07	0.0502053
0SecnSEUCqwpUoT0zc	PLEKHA7	0.180907	0.0473442	3.82111	8.82769e-05	0.0660925
oeEuIRBveB7irtUoAI	FAM81A	0.887372	0.0588227	15.0855	8.82764e-14	0.0865168
0iDR_NUopor5LieI24	LOC642947	0.280658	0.0604013	4.64656	8.82663e-06	0.0302704
HSEoBK4uv4Po5LupTU	EPHB1	3.709	0.0440802	84.142	8.82368e-29	0.146534
HVQfZXlR_H0UDV9eiE	ID3	1.13278	0.0519712	21.7963	8.81819e-17	0.0705865
ilet45VBHlfn_.1e0U	PPM1M	0.320116	0.0116043	27.5861	8.81126e-19	0.0396628
utFe59eVCMeFT4FVAk	KIF13B	0.206578	0.0155605	13.2758	8.80761e-13	0.0397724
iSPq6y6ivuTopS4CeE	RPN1	0.148653	0.0319849	4.64762	8.80163e-06	0.0248214
K6JUquOiH.jp.6SoSE	EXOC7	0.123286	0.00928614	13.2763	8.80106e-13	0.0244737
3q3JE7RX7Ub79E3ryo	CLIC6	3.81337	0.0365114	104.443	8.79914e-31	0.119991
uXVfUdJHNSkooUAqHQ	TMCO6	0.0623454	0.0163112	3.82224	8.79884e-05	0.0340905
H7rkSfuKKkK_4b2J8s	CHL1	3.13326	0.0195469	160.295	8.79797e-35	0.190291
9go67XHujio4EKo6f4	TSC22D3	0.808435	0.0694396	11.6423	8.79726e-12	0.0596998
Z_5NCdNll69uVhNXS0	ANO9	0.185023	0.0333418	5.54928	8.79657e-07	0.0547779
HlSi9AnsuJ7T7lHNdQ	DBT	0.068692	0.0147791	4.64792	8.79453e-06	0.0208847
i9X5RV9G5FdD9RD0fg	MSRB2	0.160157	0.015752	10.1674	8.79298e-11	0.0275008
Wpqpan6BjsYxXTLhTw	NSMF	0.185823	0.0243528	7.63045	8.78981e-09	0.033825
ijikS746pLhSEteIVI	AGFG2	0.163639	0.0352036	4.64837	8.784e-06	0.04844
WVH3uJJyTf3fedelR4	KIAA0226	0.196408	0.0300321	6.53991	8.78311e-08	0.0485426
xXJCQUrjnjAeetKh04	ATP1A1-AS1	0.16986	0.0222596	7.63084	8.78296e-09	0.0439668
cXUDd_ftPh35u0P1dI	INTS6	0.0943365	0.0081021	11.6435	8.78163e-12	0.0204753
Eud7FLnTTV99MUGtXI	PHF3	0.0676733	0.0145574	4.64871	8.77591e-06	0.0183214
BADyUpuum7l7DVJB0o	LINC00114	0.466298	0.121961	3.82335	8.77039e-05	0.0468985
3wjozj9AAypama6dGU	ZMAT3	0.454822	0.0595975	7.63157	8.7702e-09	0.0389773
WEinrr4jlRpwkXunk8	CEP131	0.0962763	0.0207087	4.64908	8.76722e-06	0.0271768
cqMgq.kOUzz66Knv8E	ISOC1	0.178957	0.0134764	13.2793	8.76593e-13	0.0284166
cZUqab.lwTUpb3vFAg	HIST2H2AC	1.27544	0.0262159	48.6515	8.76508e-24	0.067515
fov6B3FesoCRZJO6oI	ATP1A1	0.0844894	0.00725542	11.645	8.76155e-12	0.0151887
BVoseqPjv0KUNDqOfY	LRRC3	0.112813	0.0203227	5.55106	8.75849e-07	0.0463241
uUi6XlzRBRNX1VRCkM	HLA-DMA	0.345726	0.0158561	21.804	8.75812e-17	0.0289524
0EO.TeqB4nKa4ryXlI	TLR6	0.183515	0.028055	6.54126	8.75695e-08	0.0490397
ukdrkmvOfOAMXpJ.uQ	WRNIP1	0.067626	0.0044808	15.0924	8.75498e-14	0.0165779
Hn6t5rhXOT19Ln5yBI	SNORA9	1.608	0.106543	15.0924	8.75456e-14	0.151537
H5R0I6ARTlCk.68xEg	UBASH3B	0.591589	0.0507995	11.6456	8.75446e-12	0.112213
Z_U0Kqhj8UCVCHmXXU	ATP6AP1L	0.164033	0.035278	4.64973	8.75198e-06	0.0517262
udXqMJHVJVvzSARKQo	MAU2	0.0838827	0.0128231	6.54155	8.75126e-08	0.0277189
iXu4qRBSlGoX3Nd7P4	GSS	0.0542724	0.0141922	3.82411	8.75117e-05	0.0230423
0fgCjvrl87hGJSJeeo	NEMP1	0.175156	0.01504	11.646	8.74858e-12	0.0327548
uRDOULMF6.byK7cS1I	NEK1	0.0987327	0.0258174	3.82427	8.74709e-05	0.03258
6l.js.1XQjzQe7vYS4	CLIP1	0.28313	0.0187584	15.0935	8.7434e-14	0.0382737
ikf0xkpN37xcTcJ71Y	TSEN2	0.456988	0.0598693	7.6331	8.74314e-09	0.057369
H9N_3W150AF9Lp1UuU	SMPDL3B	0.749417	0.0981765	7.63337	8.73852e-09	0.13315
915l9eG4leJjfc5L3k	ATP6V1B2	0.0746837	0.00494789	15.0941	8.73726e-14	0.0165253
x3k3jXqO1yUU6f1J4k	ACOT7	0.315129	0.0481676	6.54233	8.73608e-08	0.0800804
TRS4ViV1EUl17N00rU	PPFIA4	0.710793	0.18584	3.82476	8.73444e-05	0.106351
cElqXjt0Jew1yR.qKQ	PTGR2	0.41183	0.0741733	5.55226	8.73291e-07	0.0718139
31IB6o6Dch_4mmuuXk	HOOK1	1.85701	0.0599412	30.9806	8.72874e-20	0.113369
fSUyR.vR7Xu0iR4nUU	TXNIP	1.56607	0.056743	27.5994	8.72754e-19	0.0754561
oCfVU5f5XV.Ee3lptA	LRRC26	1.7292	0.0792913	21.8082	8.72579e-17	0.105348
fXnqgt6JV54hj_gt28	UGGT2	0.300459	0.0257952	11.6479	8.72426e-12	0.050701
uOq6EEW0haiFKknfRI	HJURP	0.183858	0.0331116	5.55267	8.72412e-07	0.036994
rkT.iTt6sU65o5_oFI	LITAF	0.127738	0.00846201	15.0954	8.72278e-14	0.0190693
rHpApylaJFcpno.6hA	ANKRD9	0.285085	0.0322506	8.83966	8.71866e-10	0.0469595
658vdHt163ueV53qjk	INPPL1	0.123342	0.026518	4.65124	8.71677e-06	0.0284059
ciUoKIeRL.gJElbStY	RBCK1	0.111123	0.0145551	7.63462	8.71657e-09	0.0236067
ipSSBSVQlJF.rAwJJM	ATP13A1	0.339972	0.0175825	19.3358	8.71473e-16	0.0426256
0uEhHXkFS.1JRS6jjo	COA1	0.16239	0.0139403	11.649	8.70979e-12	0.0246716
lmnqOn.tH30oVX9R6c	BCL2L10	0.67432	0.0309172	21.8105	8.70793e-17	0.0853947
fEUKS0vCknOv6ApMaE	SLC7A6	0.14731	0.0225113	6.54384	8.70701e-08	0.0380148
6tTcTr_2qE.B06K5.I	NIFK	0.128141	0.0230738	5.55351	8.70633e-07	0.0252666
6l9Xbj0RR7VP6LxMfo	RNLS	0.0993562	0.0112388	8.8405	8.7054e-10	0.0351722
TGtKt9_YVpWdSNVEnc	UNC93B1	0.300262	0.0198885	15.0973	8.70348e-14	0.0412806
fbqB53X_SVT9UJ3vQs	PMEPA1	0.884663	0.0585967	15.0975	8.70128e-14	0.128928
xjfQJ55qT3O1X17SNI	ALG9	0.063497	0.00718212	8.84099	8.69772e-10	0.0194194
KLiUJIKK6AGhUBVLuU	GDI1	0.110432	0.0168744	6.54436	8.69694e-08	0.0305383
QuXm7AUSXSFJzqiKEE	FSTL3	1.772	0.0721566	24.5577	8.69452e-18	0.152127
Kr5CeIE1IriHSET4C4	OSBPL2	0.26779	0.0699833	3.82649	8.69074e-05	0.076873
cCFblJqbulmr9ka1DA	FKBP2	0.137034	0.0294532	4.6526	8.68511e-06	0.053618
xW9WJgJx2UqOFOJu44	SSBP4	0.218222	0.021447	10.175	8.68466e-11	0.0397146
xSSFiJ59Tf1OC3S.FQ	ST7	0.507778	0.0163859	30.9886	8.6835e-20	0.0512483
0B2unl2eOJ63mNeDqo	IFI6	2.69764	0.0619617	43.5373	8.68288e-23	0.100771
iSUInirCpKym4p7oT8	CALM3	0.0876697	0.00752434	11.6515	8.67789e-12	0.0149629
Hd1yqCDNEpwybr6q4I	RAB11FIP1	0.246921	0.0279243	8.8425	8.67374e-10	0.0526943
0u71NDlORUHazP_noo	WDR76	0.127087	0.0332065	3.82717	8.67355e-05	0.043529
xl7UnV3VQgEE4OJB9I	GBP2	0.776323	0.0223434	34.7451	8.67267e-21	0.0493281
EP5e.efnftcn6in1XQ	CCL5	0.494621	0.0647652	7.63714	8.67256e-09	0.0509908
Q5Qolv95e0AUTSN354	UGP2	0.0244411	0.0052526	4.65315	8.67245e-06	0.0104271
ZqygilO.S9v93sq2Pg	GCNT1	1.86275	0.0427823	43.5402	8.6709e-23	0.125042
uRtdb4RJ93ohXIKaTs	TCEA2	0.30703	0.0469048	6.54583	8.6687e-08	0.0557198
69KffSiAkLEesX6HuQ	SLC25A20	0.104933	0.0225501	4.65333	8.66817e-06	0.0394781
9pf6lHvSrHhTS7STyo	TMED2	0.181235	0.0389466	4.65343	8.66603e-06	0.0288194
6dIvrulxenMTfTV1UU	DDRGK1	0.0432367	0.0077828	5.55542	8.66582e-07	0.0161404
KEo_geY1_sUS0SB6q0	TRIM9	0.344205	0.0739636	4.65371	8.65941e-06	0.0919377
T4.6rJDUogrnoirg5Y	PSME2	0.136195	0.0208044	6.54644	8.65687e-08	0.0198837
lX0VIRusqOgCj30SJE	PHF5A	0.102573	0.0220404	4.65387	8.65584e-06	0.0339382
ZUPt15yQzuUQThLfuE	NLGN4Y	2.76455	0.0891967	30.9938	8.65438e-20	0.242038
uiu.k7pTxbT6XuCT6E	MYCBP2	0.107558	0.0164295	6.54662	8.65352e-08	0.0233599
Wku0qstUTHAj7dFZLk	RFXAP	0.0943715	0.0123549	7.63838	8.651e-09	0.0308809
Qp2AIk4iJUiooIJSOE	ST13P4	0.10973	0.0235767	4.65414	8.64949e-06	0.0335264
ivdSKCuggFOpKLKD4s	GBP1	1.11845	0.0959697	11.6542	8.64333e-12	0.0736397
H5FSfRwS6ngBNfq_Ls	GLUD1	0.0581153	0.0124861	4.65442	8.64315e-06	0.016367
630Xr1xXbVxe141614	SCNN1B	0.504089	0.0769933	6.54717	8.6429e-08	0.106568
ojk4RCsIeUAN_9_d10	MS4A1	0.914144	0.13962	6.54739	8.63872e-08	0.0822518
cIt_mP6VhmdZ.ZxJOs	ATP5EP2	0.0218288	0.00570129	3.82875	8.63393e-05	0.00822684
31TUc8ORyuooippDhE	ETHE1	0.134302	0.0350762	3.82887	8.63092e-05	0.0495602
BiCTldXtT_3zBOFSVw	CD200	0.765718	0.0311686	24.5669	8.63076e-18	0.0873349
621XukIyO6_pTbq9Xg	KIF16B	0.312495	0.0409033	7.63984	8.6256e-09	0.0818174
Ztap5fWYSCAChFjlAI	DIAPH3	0.237139	0.0178414	13.2915	8.62422e-13	0.0486475
iHXTXVINxS.OsgI6gU	SUCLG2	0.193957	0.0253872	7.63997	8.62343e-09	0.0318064
ZXjugJKr963HpyJwoI	SLC7A7	1.46801	0.0113289	129.581	8.62011e-33	0.0912357
63v4t.ogLr9PsrEy5E	TMEM128	1.06791	0.0916168	11.6563	8.61627e-12	0.116397
fuaP7h95zhef3nqhOk	PLEKHF2	0.236331	0.0267152	8.84631	8.61403e-10	0.0517848
xve7nuGHtAizelOmhE	VPS41	0.0689352	0.00677161	10.18	8.61265e-11	0.0164076
KhyFD7Tn4RB57p6_uc	CA2	6.20685	0.114101	54.3978	8.61126e-25	0.177323
ZiVKkevM9LKAeB0kdI	SNRNP48	0.236158	0.0360606	6.54893	8.60934e-08	0.0599799
xoBfXyLXvnS7rU0hrI	SLC25A17	0.30521	0.008781	34.758	8.60745e-21	0.0454888
r26tXoRpfglBff6KJA	KIAA0195	0.0872776	0.0227885	3.8299	8.60514e-05	0.0389291
xpynel6kdFV6fIRfdA	C9orf16	0.198022	0.022383	8.84701	8.603e-10	0.050005
ood7Xu0Xd1K7Unt05c	PLEKHF1	0.551686	0.0365181	15.1072	8.59962e-14	0.0542303
9IHv4PklNV5VdUp4I0	SEC14L1	0.172764	0.0195273	8.84732	8.59822e-10	0.040858
6pLPNBCtedLtSVWeL0	AP5S1	0.140296	0.0301283	4.6566	8.59277e-06	0.0414986
xeeuSudt5.OV9RN79k	GPR18	3.32987	0.0764433	43.56	8.59004e-23	0.199005
il0V5OcojoXt3MSSyM	GALM	3.09779	0.112151	27.6216	8.58956e-19	0.173252
i7k.0Xiv1eTV5LlAlU	GLB1	0.0709751	0.00928759	7.64193	8.58949e-09	0.02032
9131UeadVLaZ_ZogdI	PIGP	0.187138	0.0285708	6.54998	8.58936e-08	0.0396588
BEB46LReQ3TNeug5To	GUCY1A3	2.13641	0.0490444	43.5606	8.58758e-23	0.165491
ix2op4pKIOm4Faguic	KIAA0101	0.217517	0.0284621	7.64234	8.58236e-09	0.0227545
9B3EjpMXuXn3qvoLuE	DIRC2	0.084292	0.0180998	4.65707	8.58207e-06	0.0381799
fiuenn78T3Xeqdxd1E	ABCC10	0.176267	0.0199208	8.84836	8.58191e-10	0.051361
xfozx4CoquiOrukuzo	DHCR24	0.179108	0.046753	3.83095	8.57892e-05	0.0350619
ZqSpvyx7dV.FJAXh9E	CMC2	0.0633622	0.0136052	4.65721	8.57885e-06	0.0156284
EUox1eTjE3ukuAMS3I	GPR34	1.35799	0.0491604	27.6236	8.57755e-19	0.140472
HR0Ih8yURBQ3efSHeo	NFIL3	1.2463	0.0727942	17.1208	8.57726e-15	0.113313
WdK45HoN0koqrLyILw	NAP1L2	0.219598	0.0287331	7.6427	8.57621e-09	0.065872
uWhno74XoYLseXwYf4	TRAK1	0.180187	0.0275065	6.5507	8.57566e-08	0.0510872
xSMQcar7oifRLkmmLU	HLA-DRB4	1.68201	0.0248171	67.7764	8.57565e-27	0.0639256
xfn0viFxv_lLVJKCM0	NFATC3	0.179774	0.0385999	4.65736	8.57533e-06	0.0580536
6.U5SL_7qamTuRRIuQ	SEC11A	0.0334672	0.00718582	4.6574	8.57446e-06	0.0118253
Zl5rjUey5KT6md6Rfc	PTPN2	0.0819452	0.0213879	3.83138	8.56818e-05	0.0269369
BSUuUH2eUH_uU_v33o	MAGED1	0.2476	0.0089628	27.6253	8.56706e-19	0.0262592
BI90n1UokIXeJWUJmk	MCM7	0.276495	0.0721607	3.83167	8.56103e-05	0.0557331
lEUI557fz0BF6baUEk	EXOSC1	0.0616162	0.00696247	8.84977	8.55994e-10	0.0156534
K9xXIrUKg9Krp5KlUY	TCEAL4	0.173941	0.0227555	7.64392	8.55518e-09	0.0365947
xQSY9KFQu4EEdJWV3o	KCTD10	1.34587	0.0115575	116.449	8.5547e-32	0.0966493
T4CiS6Vm4_6T8KJLpU	TPK1	0.650929	0.0264828	24.5793	8.5461e-18	0.0618966
x0h1eUX.Ver3lt_XR8	DPM2	0.0947295	0.017034	5.56121	8.54438e-07	0.0310962
ouEuCE4I4icJJ16_Xo	THOC1	0.0616221	0.013227	4.65882	8.54199e-06	0.0212398
Wh7fgTVA5RaBVJXydU	HRAS	0.180649	0.0204096	8.85119	8.53797e-10	0.0356825
EVJetUzTLgOuXsCd0k	IL12RB1	0.258717	0.0254007	10.1854	8.53654e-11	0.0494255
06CvPSuaE8UG7kqObU	KATNA1	0.0707736	0.00694841	10.1856	8.53462e-11	0.0202086
Zm6KV6Hnnb38o6Hves	TMEM87A	0.0660902	0.0172436	3.83273	8.53457e-05	0.0172781
lAogJ15r2VIBHEZfSI	OGFRL1	0.564724	0.0861796	6.55287	8.53442e-08	0.103601
fkk3XtVSU7T3J7gekY	KLF12	0.206731	0.03717	5.56178	8.53255e-07	0.0664174
oU.VH5F9O96RS6NJ_k	HINT3	0.0782101	0.0204046	3.83297	8.52863e-05	0.0327573
QV5Q4iXb8XqeQyXALU	MYO1F	0.358509	0.0405002	8.85202	8.525e-10	0.0874698
6EhySnHqFwAre8O06U	PTPRG	0.590858	0.066747	8.85221	8.52215e-10	0.107925
cqdet6d7XTuc7hXhAU	SYNGR1	0.918579	0.0474493	19.3592	8.51736e-16	0.125931
ofCQXnSrRt1BKSyLQo	OLFML2A	0.871319	0.03153	27.6346	8.51002e-19	0.127607
QXiHpCoop4kgotNOig	ARMC5	0.0982947	0.0256383	3.83389	8.50579e-05	0.0405639
fVLYgTfsJfTwqUXnt4	ZNF518B	0.0804635	0.0122756	6.55475	8.49909e-08	0.0236769
BCSaF6nve74KLuVLlc	AP3D1	0.0948943	0.0247495	3.83419	8.49856e-05	0.0280515
3sef0u71V0lXWm7Skw	C14orf2	0.135633	0.0133128	10.1882	8.498e-11	0.0261666
EfewX9d1aH4kFxEdE4	MED6	0.037819	0.0081142	4.66084	8.4961e-06	0.0128742
HpXlFIC2JHrXLSnuOA	GPN2	0.0425262	0.00912409	4.66087	8.49539e-06	0.0150384
iLt7S.cPpO7Ked7h4I	CNOT7	0.0291205	0.0075947	3.83432	8.49528e-05	0.0130929
9hdHpe64eREnZAHt.o	MCPH1	0.141112	0.0215275	6.55498	8.49478e-08	0.0390783
0XlXNHLk57pSEjhF.4	PLIN2	0.344264	0.01778	19.3625	8.49014e-16	0.0357094
Tkh.l..QK6JuDFIKNQ	ID2	1.61332	0.0583729	27.6382	8.48799e-19	0.0844505
NtJKjCo7ye15Av_tLQ	ELAC1	0.142591	0.0217518	6.55536	8.48752e-08	0.0486001
cS0d5EQiA0H26_jqlo	SYNM	0.891521	0.0589698	15.1183	8.48598e-14	0.113441
TnJevX.OhODIdEegoI	ZNF700	0.171808	0.0262084	6.55546	8.48563e-08	0.0428235
9qDd_iB4p4qyKizlQs	WIBG	0.0555708	0.0119217	4.66131	8.48552e-06	0.0226716
x7kpTuXuB_C.mQDugI	C9orf85	0.136228	0.0207807	6.55552	8.48461e-08	0.0390113
u6vAqGLeX16e4RqFX8	NAGPA	0.171106	0.0223721	7.6482	8.48198e-09	0.041374
ioTlK86fyJF4I.74To	GTPBP8	0.267947	0.0229663	11.667	8.48065e-12	0.0468906
EojoLJTkgJ4Tjukojc	LOC646836	0.799273	0.0412769	19.3637	8.48017e-16	0.0958599
W1.N7nd5WUuXxD_QG4	MSRA	0.718742	0.0184495	38.9572	8.47351e-22	0.0768853
KqKjqfNQUty86K15yU	HNRNPH2	0.0791788	0.0206439	3.83546	8.46724e-05	0.0260183
lVUBVf_uIE1X4S_SXc	NUMB	0.27688	0.018312	15.1201	8.46664e-14	0.0325357
ZuOo8SO4lFuXJQo4j8	F11R	0.39221	0.0841251	4.66223	8.46475e-06	0.0847817
TnqJL5KUS4Lu_fe0fw	TRAPPC2	0.215985	0.0185103	11.6684	8.46342e-12	0.0325548
3oLk6h.V3eR1J3x7FM	MSRB3	1.18063	0.0887309	13.3057	8.46175e-13	0.163672
upWX307QohTkj44igk	SLU7	0.0890201	0.0190933	4.66237	8.46153e-06	0.0273178
9OlMdIRF_7pedIno5Q	QSOX2	0.148861	0.0267484	5.56521	8.46144e-07	0.0349699
uelcXRJ4B.AASjqUUk	NPIPA1	0.250354	0.0282688	8.85619	8.4607e-10	0.0452046
Qe5RTVlJT2dceOIQjs	SDHA	0.0463304	0.00832494	5.56525	8.46064e-07	0.0151038
KR6i5xSBxRKOAuuJUU	UBXN2B	0.0727856	0.0189756	3.83575	8.46e-05	0.0305834
0V.foqL6xLSX_oINR4	TBC1D8B	0.673896	0.0393317	17.1336	8.4584e-15	0.0997888
ltEJFJflEF4Lj0gThY	IDE	0.105603	0.00698388	15.121	8.45803e-14	0.026074
fICCwXVCeFeFSVRHe4	LINC00176	2.66312	0.0489138	54.4452	8.45624e-25	0.192551
KE6r16_9eTVjF0lelc	GPA33	0.734679	0.0428786	17.134	8.45558e-15	0.113507
iSscIckqhFCHeRBSPk	SLC12A8	1.58679	0.0109937	144.336	8.45498e-34	0.0814431
cSA9IColJRXqkuC5R4	RGL2	0.109278	0.0196342	5.56567	8.45206e-07	0.0404693
lfXxJfqjoflRF1F1Xg	PTPN7	0.162977	0.0184013	8.85683	8.45094e-10	0.0339958
9uz4k3sO5ST7lSnKqc	TNFSF9	0.115274	0.0300479	3.83633	8.44586e-05	0.0277974
Wbvo6oe6sjKoEOItB0	ASNS	0.318228	0.0682414	4.66327	8.44126e-06	0.0442597
Quw41DSrLu7lT9dCro	LINC00200	0.29675	0.0196226	15.1229	8.43851e-14	0.0654102
cyu5cWTvlnnv3nqG3g	NOL12	0.125272	0.0268622	4.6635	8.43609e-06	0.0259951
rqVD33UYQ5WFk75EFQ	SETMAR	0.312728	0.0353048	8.85795	8.43378e-10	0.0462603
fpspJKJShAkAfs27SE	KIF23	0.149218	0.0388906	3.83687	8.43262e-05	0.0520513
EiHe.NHJfe1dWSCHvo	UBE2E2	0.186392	0.00757811	24.5962	8.43228e-18	0.0274626
ZUh0El8Ss3T4NLm0iI	PIBF1	0.107147	0.0140039	7.65119	8.43135e-09	0.0334192
9aqj_SEpSiM66Nf9MU	RABGGTB	0.0797	0.00899727	8.85824	8.42928e-10	0.0176643
B3Oj_nfXOKTn9aIu4I	VWA5A	0.20159	0.0525371	3.8371	8.42687e-05	0.0708405
BjpCEsgkinlRqHsFbQ	IDH1	0.171543	0.0261548	6.55875	8.42412e-08	0.0374766
ZeuFlElWf7BSoMRLT8	LRP3	0.759987	0.0571022	13.3092	8.42194e-13	0.132046
raKCeHxS9LilPdQId0	SPIC	0.214835	0.0559831	3.83749	8.41742e-05	0.077081
QcZ6LXge6sgBGF6f7I	TMEM51	1.46449	0.0529651	27.65	8.41621e-19	0.120906
WjhjsVJ9RlTpxSiCu0	CRYBB2	0.917317	0.0331759	27.6501	8.41593e-19	0.106129
EeQkiP3f6.4r4Lt.pU	PRCP	0.144791	0.0260066	5.56748	8.41489e-07	0.0303623
KeSoC9fe2v.IRI3d5U	ITPRIPL2	0.361971	0.0943216	3.83763	8.41408e-05	0.0657365
QkHp0s9EqAnuKgmA7o	L3HYPDH	0.456137	0.0342703	13.31	8.41387e-13	0.0702631
EShicef6Jir9ef_L4U	CDK19	0.185924	0.0122917	15.126	8.40737e-14	0.030151
KnhamGWaivegGWonmI	P4HA2	0.818528	0.10696	7.65265	8.40663e-09	0.144586
NpI0sJCt.uqS_2F0UI	RAD54B	0.141426	0.025398	5.56838	8.39633e-07	0.0340803
cqtTrc.PdlSdFdxEhE	PPP2R5B	0.345138	0.0526094	6.56039	8.39353e-08	0.0655828
Zgxl_ePJRFSkPwzU60	PAXBP1	0.118395	0.0253768	4.66547	8.39166e-06	0.028264
39XcUepHiGCdXhJYh4	HDAC7	0.459129	0.0599889	7.65357	8.3912e-09	0.0957672
BxQRbgzbu6XwUKBIJU	SDR42E1	0.419465	0.0359309	11.6742	8.39066e-12	0.0772175
l51UglZFVH4RIyv7nE	POLD2	0.1275	0.0332132	3.83883	8.38467e-05	0.0465754
36UrIoHIAiP__Xv94U	C1GALT1	0.532068	0.0399656	13.3131	8.37824e-13	0.0661637
661JV0Zdd0tx0PuHtU	CLTB	0.0698624	0.0149724	4.66609	8.37795e-06	0.0201845
ocMV36ACJ_VddSRHIk	VAC14	0.11072	0.0198805	5.5693	8.37766e-07	0.0353394
9ndXu0z.HCP_5dO3Hk	FAM133B	0.0677963	0.0145294	4.66613	8.3769e-06	0.0245812
TKeSE_i_Y6lIesSO.k	ATP2C1	0.295961	0.0107005	27.6586	8.36466e-19	0.038926
3F4dNSe19AydbdXcVI	CHST7	0.327505	0.0499096	6.56197	8.36435e-08	0.0446118
0IBWIQnlSRIrgoIS5s	NFKB2	0.360104	0.027046	13.3145	8.36284e-13	0.0501543
HuyJCRv9RdHt1NdRd4	SLC5A6	0.431714	0.0251811	17.1444	8.36038e-15	0.047494
3oCG5S_6KAT0R43nLU	ZNF425	0.218673	0.0569453	3.84006	8.35494e-05	0.0685748
0qVS76JdKCBSQCEtQY	RBM6	0.121267	0.01584	7.65576	8.35434e-09	0.0266587
onSrqIqVanle0ddwR8	SEPN1	0.35768	0.0467202	7.6558	8.35377e-09	0.0843664
QN4TRVJlP7AiQf1JLE	SAR1B	0.125446	0.00829039	15.1315	8.35207e-14	0.0219057
lKdX3iXdeeeF40Xen8	UCP2	0.351376	0.0535396	6.56291	8.34693e-08	0.0431524
BS5eh1edbimD8RatSc	ZNF695	0.850923	0.0307618	27.6617	8.34634e-19	0.10721
oo7gvetO0X5u3RXoos	FOXK1	0.114915	0.0175088	6.56325	8.34059e-08	0.0282572
QVApRNQhKQw4ki.EnU	IQGAP1	0.080077	0.0208494	3.84073	8.33859e-05	0.0240546
iCFcx3S3VQVFVCie6g	ZNF384	0.0644096	0.011561	5.57129	8.3372e-07	0.0266046
f_p.kpTml3tE3HQd54	ATG4A	0.0904819	0.0162407	5.57129	8.33706e-07	0.0278877
KcgpJNE9U3x86HXFXo	NR2C1	0.179558	0.0384657	4.668	8.33523e-06	0.0450927
6R3lXR9fypAwRJIFG4	TMEM150A	0.279138	0.023901	11.6789	8.33192e-12	0.0575289
c64oVUSfcfV6EvZfdQ	RARRES2	0.449353	0.0586816	7.65747	8.32581e-09	0.0940419
93vfVUXlGxIlQvdnKc	TFG	0.193348	0.0347005	5.5719	8.32471e-07	0.0530896
cld3ujVx56.eX3U54g	FCGR2A	0.691513	0.0222679	31.0543	8.32279e-20	0.0911266
KOCKhJj1irh4pxJ9zQ	PDCL3	0.112209	0.029209	3.84157	8.3183e-05	0.0289128
fIcSejJ5X8JfojqijU	WDR75	0.0284423	0.00740378	3.84159	8.31788e-05	0.0119805
u1R5dd1LrdUrlIVAJ8	HNRNPUL1	0.0417086	0.00893308	4.669	8.31303e-06	0.01369
QvhSDL6wd5SJex8XlA	ANGEL2	0.0657122	0.0171043	3.84185	8.31168e-05	0.0201569
0Qf53V5bl2uudeDung	CENPV	0.354083	0.0921644	3.84186	8.31129e-05	0.0463048
cSYrV7i.gIJ7eYLpX4	SPTBN1	0.285555	0.0434971	6.56492	8.30993e-08	0.0436059
EWWW0UnOT0db9S4kjs	PACSIN2	0.405601	0.00929597	43.6319	8.30364e-23	0.0375213
WJBSL9T2gr1eQCpEiU	BCL7C	0.153882	0.0276121	5.57298	8.30289e-07	0.0411985
TiiSuS49MVHcCee46U	APIP	0.126614	0.0142798	8.86664	8.30188e-10	0.0242534
cXFu7uv_q.b_r_r34Y	TOX2	1.21178	0.0277722	43.6327	8.30034e-23	0.0600551
x1wiieL77q9zvx9Vzo	IKZF2	0.524448	0.0798782	6.56559	8.29748e-08	0.078449
ijOuV7s1SI5yAHvf50	WDFY1	0.621748	0.0178555	34.8211	8.29737e-21	0.0461899
9gl7MATrEuLg5VTVQg	MEIS3P1	0.266518	0.0478195	5.57343	8.29387e-07	0.0706953
uxKXrHumdbgPIbzSC0	H3F3A	0.110693	0.0237027	4.67003	8.29023e-06	0.018593
KucVf485IQXTSeXB80	RASA1	0.485202	0.00890308	54.4982	8.28647e-25	0.043436
QjIAoqJx3SnkJpBLlQ	HLA-H	1.67989	0.022189	75.7083	8.28522e-28	0.0774991
HKtKnpfXe5NHecr6qU	HYOU1	0.542935	0.0612225	8.86822	8.27811e-10	0.0668876
0R3_RHfu..nR7RPVJE	PHF11	0.193084	0.00784261	24.6199	8.27466e-18	0.0249922
TWl6.Zetu384kU7CXU	E2F2	0.567999	0.0259734	21.8685	8.27335e-17	0.0496683
NV9D10LerrhCsqnKx4	FAM20B	0.139823	0.0119673	11.6838	8.27236e-12	0.0271986
ZWmhJ58TvTd_UDCrVc	PC	0.614645	0.0358304	17.1543	8.27097e-15	0.108321
K7RF55XH3F13H0WZ54	TM7SF2	0.258232	0.0150533	17.1546	8.26844e-15	0.0399576
Ze51xTRTsIPVqJ1OX8	IL23R	1.50563	0.07765	19.3899	8.26484e-16	0.159718
QFOGA8mS6f6ocmNep0	DPM3	0.167395	0.0358352	4.67124	8.26365e-06	0.0393437
Ed2iSvih7ueHugoLpc	TGM5	3.01625	0.0866038	34.8282	8.26319e-21	0.194478
fuGuHul_CXooe_pOyE	FBXO31	0.0996351	0.0112336	8.86938	8.26063e-10	0.0252295
3ntYFxQiRAkJOTVuHk	LTA4H	0.0472749	0.00847964	5.57511	8.25991e-07	0.0136497
rJBOfrD_k3vCsoi64E	2020-09-11	0.119353	0.0255488	4.67158	8.25616e-06	0.0274427
6SuD9VJeP9SOHEP6iE	YBEY	0.470792	0.0274416	17.1561	8.25423e-15	0.0595297
65JQ5w59R959wx7S6A	PRPF40A	0.206368	0.0441738	4.67172	8.25292e-06	0.0467064
0h575QxdIdSoCIopTQ	SLC37A4	0.136986	0.0117228	11.6855	8.25197e-12	0.0245823
QfQKRJKSDipRKSi67o	SDHAF2	0.0711854	0.018517	3.84433	8.25197e-05	0.018095
ulB7I9S43pV5cXX13c	ZNF280B	0.171202	0.0366453	4.67188	8.24958e-06	0.0587942
oql0AiEUkHqX4gfU.8	GPATCH2L	0.381672	0.0373952	10.2064	8.24765e-11	0.0769862
3Qo4ejyl5fPt6l75JQ	SLC30A6	0.148708	0.0318297	4.67199	8.24717e-06	0.0526284
HV6oyeqT_3J6nF9wR8	TSPAN14	0.155323	0.0332455	4.672	8.24691e-06	0.0518576
l1V3Xr9RF0hGRL0ULk	MYH11	0.861979	0.0971735	8.87052	8.24367e-10	0.146619
EEDSXrRSf9oEkiESKk	IFIT3	4.38565	0.100479	43.6473	8.24359e-23	0.135528
ZJ5no6EWX5Hvo96s4Q	ADAM23	6.37615	0.0755348	84.4135	8.24002e-29	0.29517
3Qp_0JLudNE6wNOSbo	CSNK2A1	0.215635	0.0386711	5.57611	8.23982e-07	0.0559796
0cn1ftaKM8A5yrivyU	TFG	0.696769	0.0200028	34.8336	8.23719e-21	0.0461262
36UASnSlAhdUJ7Ox9Q	DSCR3	0.080993	0.0105694	7.66298	8.23423e-09	0.0218538
HUUX_KF27VAIf5c1SQ	SLC43A3	0.152857	0.01723	8.87153	8.22853e-10	0.0302786
Qun3e4Pl7BEy6fdZX4	LEF1	3.32161	0.0393462	84.4201	8.22628e-29	0.163289
0H6ylikog2fAVuK6K8	HSCB	0.132284	0.0283081	4.67299	8.22513e-06	0.0280727
Bgq6nw6if5eoXgXokc	VWA5A	0.268639	0.0408913	6.56958	8.22457e-08	0.0723159
c_5.L5y.seIvhd1e5I	MTSS1	0.273466	0.0233974	11.6879	8.22216e-12	0.0547652
BoQJSX7ovrLX7v.TJU	C11orf31	0.142607	0.0370829	3.84562	8.22107e-05	0.0577259
r.fXqpd3Qo4r.gjzlI	RPS2	0.0505944	0.00660172	7.66382	8.2205e-09	0.0109226
u4qfw1.AH6IJ6epmuk	PLEKHB2	0.227578	0.048698	4.67324	8.21957e-06	0.060116
QUUF7M0JdflUQJ9QJU	ERI1	0.118671	0.0116246	10.2086	8.21828e-11	0.0270816
NfUlLd7FkbWif23GHs	FOXC1	1.01353	0.0590628	17.1603	8.21738e-15	0.118413
QJUo3p.lIr5BO_IgVo	ABCB9	2.38039	0.0545277	43.6546	8.21498e-23	0.12547
NkgchVZRJJd4L6EkAU	APP	4.85374	0.0515962	94.0717	8.21282e-30	0.180836
6usWUA9AVSHVgdOdIE	FBXL19-AS1	0.170139	0.0364043	4.67359	8.21189e-06	0.0538918
3qn9u1V7mtLv9LFF3c	PDXP	0.141505	0.0106169	13.3283	8.21076e-13	0.0233659
Wv10HCokEoTeeonkqk	OXSM	0.0549562	0.0142889	3.84608	8.21011e-05	0.0258959
xSUpJ_beA0XUCiTd7M	CLUAP1	0.0590184	0.0153438	3.8464	8.20271e-05	0.0321283
3RSnk4h4X1pPfHDLf0	DENND5B	1.39318	0.03191	43.6596	8.19572e-23	0.105802
HXqBPB5dEG.uXS8Vsg	SNORA59A	0.341247	0.0291901	11.6905	8.19057e-12	0.0721066
fW1rQwDWXh15lVk5gA	NPW	0.327403	0.0498218	6.57149	8.19005e-08	0.0776199
0aZXcBf5XN7_RC_S7k	AMZ2	0.0545746	0.014186	3.84707	8.18663e-05	0.0159715
9_qiesHjgN.1Rf930o	FGF2	0.434045	0.0371262	11.6911	8.18394e-12	0.0835803
T5yyiW8qii.qt1EY5c	ANK1	0.552704	0.118229	4.67487	8.18393e-06	0.118923
QKF6lPkFAOqH16sqK0	VAT1	0.275587	0.0269887	10.2112	8.18382e-11	0.0543706
QEpXPUlV_fR3FoSGkk	SLC15A3	0.43986	0.0201025	21.8808	8.18376e-17	0.0399613
NICr.zoUOVS_0tIlvo	SGK1	5.21339	0.133596	39.0237	8.18371e-22	0.178741
TbinVSUSVXfH5fAHog	RNF216	0.116613	0.017744	6.57196	8.18151e-08	0.0287653
QSk5xDUoe673O5bs60	NT5DC1	0.332613	0.0171446	19.4004	8.18066e-16	0.0395477
6Lyzpd78C6eqUAwqOI	UVRAG	0.178367	0.0463609	3.84737	8.17962e-05	0.0622314
WbfQoVL541QQCtQAqU	NAMPT	0.563755	0.025764	21.8815	8.17898e-17	0.0496806
3RXJ4KE1L1UnsvOzeU	THAP1	0.0693199	0.00904208	7.66637	8.17848e-09	0.0244583
rQvx197.i.7JLsVGeo	ZMYM2	0.130207	0.0146712	8.87494	8.17776e-10	0.0291646
3JGiA1ORqAJ94RLSdU	ZSCAN29	0.192486	0.0164635	11.6917	8.17618e-12	0.0462154
TeYp8Xrqnf4oRQXu5w	HIST1H3F	0.329568	0.085657	3.84753	8.17582e-05	0.0615154
rCOmieZudsntCKtNhw	ETFB	0.227418	0.0296624	7.66688	8.17015e-09	0.0354634
ortS6TUiAkXzi6CD_g	GGH	0.0880615	0.0114857	7.66707	8.16703e-09	0.0200363
rlKvolhhSAPkkpH8KQ	DPH5	0.150455	0.0269643	5.57979	8.16654e-07	0.0302132
rkRY6.Xs0SVAivd66U	GHDC	0.127122	0.0165801	7.66717	8.16538e-09	0.0326944
QiF7uBz4gjaBJ18d4o	FUT8	0.468596	0.100217	4.67579	8.16391e-06	0.0587401
91r.DPno.nF.rx_5Ls	AKAP11	0.219422	0.0393226	5.58005	8.16121e-07	0.0357652
63s44IPpUq4ap4Wong	TTLL1	0.13814	0.0358976	3.84816	8.16078e-05	0.054157
B7WU60gRcXVevPuKek	MZF1	0.188503	0.0337813	5.58011	8.16018e-07	0.0362314
Tukq7v7qou9HrHfi6U	GLE1	0.0433209	0.0112571	3.84831	8.15732e-05	0.0145772
xIk7hXgUneFSggh1FU	PYROXD2	3.02733	0.0445603	67.9377	8.15665e-27	0.225882
fuspSX4JTZEtyAfuyc	RHOT1	0.062969	0.00957945	6.57334	8.15654e-08	0.0191142
EXRtTR6d3D1H7097hU	ATP6V1G2	0.261363	0.0397609	6.57337	8.156e-08	0.0706848
01ScdqKeKeijZ_LUos	RN7SL1	0.180615	0.0323658	5.58041	8.1541e-07	0.0215788
TnoszXhUhcYT4I.klo	SMPDL3A	0.56057	0.0479382	11.6936	8.15307e-12	0.110189
6ooIhor4r.197MJFx4	PRKCA	2.28486	0.0467995	48.8223	8.15131e-24	0.174256
xR5R1LXlFFe313kLnQ	PCSK7	0.0595308	0.0154679	3.84866	8.14911e-05	0.0227615
lJ5KaUZFKl5H8yFJFo	PYCARD	0.398801	0.0341032	11.694	8.14889e-12	0.0720862
fSIK50pQSER1.LYv4o	MCCC1	0.169357	0.00872757	19.4049	8.14488e-16	0.0268764
EpglSiFFii.DYiO96I	CCNDBP1	0.0914193	0.0237518	3.84894	8.1423e-05	0.0408401
NkX0P5TbhkhezA8rwI	CXorf40B	0.231174	0.0260405	8.87748	8.14026e-10	0.0418644
cigtUAK57R.C96H6r0	CREB5	5.98279	0.0270333	221.312	8.13995e-38	0.249551
6oiX7gf8n_uRJ4xSio	ZNF75D	0.0976297	0.0208743	4.67703	8.13699e-06	0.0314024
lL5QkKKIjsbqe7pLVQ	SUSD6	0.193252	0.0293931	6.57474	8.13142e-08	0.0372529
E7gcfnS014rAK1KL6k	ACOT1	0.254042	0.0248683	10.2155	8.12597e-11	0.0519169
BtVCAu0iX8boX1ToAo	ANKRD20A11P	1.50428	0.169429	8.87853	8.12483e-10	0.151899
lVJ4FYpwII4pCIA7FU	IFI27L2	0.120558	0.0183352	6.57521	8.12291e-08	0.0262743
umiL0YHuVBk7zJSrXE	TNS3	0.920867	0.023589	39.0379	8.12286e-22	0.0936914
Bk6eL10K0KmIIul87U	PRPF31	0.0624911	0.0133592	4.67774	8.12159e-06	0.0193371
cRE5.3kbr5fLTfXEkU	GNPDA2	0.131242	0.0171114	7.66986	8.1215e-09	0.0289093
QXdl6KN7lN_j4g_SO4	TRIM32	0.160437	0.0342979	4.67776	8.12125e-06	0.0419732
uEJ6JKUGOGZkX3E02I	TRAPPC5	0.147236	0.0191961	7.67009	8.11777e-09	0.0257588
QeWTjJAnYYf.sELrpc	SPAG6	0.749231	0.034227	21.8901	8.11733e-17	0.106136
fVjoSNL.hd_03uneLo	ETFDH	0.126157	0.00832436	15.1552	8.11699e-14	0.026934
Wk4n1OuC33sUORSIOU	KPNA5	0.234386	0.0263975	8.87909	8.11659e-10	0.0561016
0fFkRXA1KV03sV0eo0	KIF7	0.222083	0.039781	5.58263	8.1102e-07	0.0711822
KXVXvXlUJbQ0j7oksQ	TRIO	0.135281	0.015235	8.87964	8.10846e-10	0.0411334
QgqgOig5XXt7tvd7lE	ACAD8	0.202075	0.0172751	11.6975	8.10635e-12	0.0373519
0eS_5JIoh5Ifa_KAas	RTN4	0.292857	0.0286634	10.2171	8.10478e-11	0.0708364
0PSNafoSkXiOuUC5J4	COMMD5	0.0719632	0.00938131	7.67091	8.10449e-09	0.0211771
KvsgRKJORPSAFQlUTo	YAE1D1	0.101154	0.0181184	5.58294	8.10402e-07	0.0316006
NRcFEbkMC125eedElU	TNFRSF13B	0.433818	0.0176016	24.6465	8.10174e-18	0.035125
lpeo0F6ntREgBABUFA	DUSP10	0.417285	0.0356708	11.6982	8.0977e-12	0.0513135
KpCYUm43RIkQFdLdQU	CEACAM1	0.384304	0.0688277	5.58357	8.09163e-07	0.0878163
o0I20aK5JKOpKH0frU	FABP6	0.629543	0.0616096	10.2183	8.08935e-11	0.115822
34R05QQgXuVdfXBeKU	CD72	0.726123	0.0620672	11.699	8.08869e-12	0.0861422
B00U16MLF4LSmGqKkY	CYFIP1	0.243201	0.0238005	10.2183	8.08862e-11	0.0528683
Zp.y8ekeEqGJdNIgx0	UFD1L	0.123742	0.0221612	5.58375	8.08819e-07	0.0469502
K6IlaZV5RdXhW3DMwM	MAPK3	0.240552	0.0205615	11.6991	8.08705e-12	0.0351293
9T9eIUSIiqIJeo_Egk	LCK	0.532508	0.0599592	8.88117	8.08602e-10	0.0691291
ZujesuJTfoV4IopBEU	FBXO22	0.179087	0.0233428	7.67207	8.08566e-09	0.046049
Qllyy9XtECo5Qp8WN4	FYN	1.16282	0.151566	7.67208	8.08552e-09	0.154027
3wsLStXCVbVCC4RC6U	SFT2D3	0.101735	0.0182193	5.58389	8.08535e-07	0.0411888
BCrSnX.y9Ij0pJR1S4	AP5M1	0.087285	0.0132704	6.57741	8.08347e-08	0.0222628
3BlNNCBlxCCpi4qRJo	POMC	3.02974	0.0555268	54.5635	8.08194e-25	0.177701
WsHk4IK3qh0RKJ6keI	MAB21L3	0.348734	0.0298073	11.6996	8.08091e-12	0.0781651
6n6Sz9J6eig_iApVBQ	PGM3	0.296066	0.0530185	5.5842	8.07932e-07	0.0562173
i4JVdIJXl7RtpP7iFw	ICOSLG	0.178532	0.0381497	4.67977	8.0777e-06	0.0515421
Nuil6.erDl1fqTfTk0	ADCY6	0.740932	0.0633279	11.6999	8.07721e-12	0.117623
Hgiv395FKKKbnQs2sY	PMM1	0.127013	0.019309	6.57794	8.074e-08	0.0269678
Q35dRFdd1KFejg1ve4	RRP7A	0.62584	0.0815653	7.67286	8.07284e-09	0.0528355
faTTVN3D9V3tdTUmn0	RAP1GDS1	0.295973	0.0252961	11.7003	8.07232e-12	0.0422161
6xSHWEQ6lFFLuEkoTU	LRMP	0.636049	0.0290478	21.8967	8.07029e-17	0.0449008
964df114E6Fj6kySOk	RTN4IP1	0.274369	0.0586223	4.68028	8.06687e-06	0.0474627
iYen13dK56Puq8uk.U	CDC42BPA	2.78407	0.0329482	84.4984	8.06583e-29	0.172563
0UuayX_1fTl.Q94uoo	JADE3	2.54675	0.073034	34.8707	8.06152e-21	0.136109
cXp3tFlOQdTlz8egF4	COX4I1	0.0395854	0.00845691	4.68083	8.05491e-06	0.0108533
ThH5Ek6d5dEOOS0lF4	CTSZ	0.827837	0.0707437	11.7019	8.05355e-12	0.0579378
cU08kvtW_1g2R7P1Fc	P2RY10	0.13252	0.0149176	8.88348	8.05229e-10	0.0254114
0khvJKd9AMHU65EokU	TPBG	0.472129	0.0353833	13.3433	8.04763e-13	0.0903252
uor8nTo_mnU9yXf6sU	ACTL6A	0.105715	0.0160673	6.5795	8.04624e-08	0.0217161
uhSgrzlH_609TkLTps	BCO1	3.66888	0.0839581	43.6989	8.04547e-23	0.208614
cEDlG0E0obwX8hXM60	ANKLE1	1.02107	0.0673411	15.1627	8.04394e-14	0.090264
rKqHARdSCXcS6XkgVc	MEF2BNB-MEF2B	0.304218	0.0396393	7.67466	8.04387e-09	0.0699664
TASKea9AhURGRCFa54	PTP4A3	0.565967	0.0424146	13.3437	8.04372e-13	0.0726201
THlCSWhEaqRINHgqgA	FBXW7	0.460182	0.051798	8.88416	8.04231e-10	0.0807336
Zn9731.kLACrq29Rx4	SCARNA23	0.807066	0.0689614	11.7032	8.03878e-12	0.126783
Bir.CuqIjCp3dqU5xU	LPAR2	0.166138	0.02974	5.58634	8.03736e-07	0.0449633
cnBChQLongJFMXjnjQ	CEP290	0.0607877	0.015775	3.85342	8.03728e-05	0.0291194
EuCFC1IHg1wgOSh5Ag	OAS3	0.487119	0.0740299	6.58003	8.03692e-08	0.0972338
oXsWAugphUr4oLiNSU	WBSCR27	0.367719	0.0558838	6.58005	8.03643e-08	0.0887779
lj3sBXotOu_eo5rl80	SLC25A24	0.671095	0.0874358	7.67529	8.03365e-09	0.130071
Eg5j0Rf7ktaN0fppCo	CAT	0.275268	0.0206276	13.3446	8.03324e-13	0.037719
3ec8iVNeiVRd4FF1xQ	SPAG7	0.082516	0.021412	3.85372	8.03043e-05	0.0242773
ceKIAvDQUrx1RL_Vu4	SNAPC3	0.0769888	0.0199773	3.85382	8.02806e-05	0.0250175
o3eVzqne15FXSo6YSQ	DGAT1	0.0762723	0.0162902	4.6821	8.02787e-06	0.0307028
f526.S7W7tTu3lfSic	RHBDD2	0.198466	0.0301589	6.58067	8.02551e-08	0.0379913
fOigZNF5VN5NhJRNZc	MIB2	0.27743	0.0421577	6.58076	8.02387e-08	0.0545823
We18LlNB3SdX7J.7qM	NSL1	0.138396	0.0103702	13.3456	8.02316e-13	0.0236124
o_6dVarNGX.HlGiDlc	BMP2	1.04881	0.0478829	21.9036	8.021e-17	0.138771
NT6kf1TdQdoLCVCIEE	GPR183	2.41674	0.0396591	60.9378	8.01977e-26	0.0966673
NIB6CiWvYnSVeJsHu4	SCAND1	0.0896329	0.0191413	4.6827	8.01504e-06	0.0288768
B.MnES5zlIlJgt51ZU	HIST1H2BJ	1.71222	0.0781662	21.9048	8.01276e-17	0.0994948
rUAeoKULEt3uubPhhU	RAB30	1.41142	0.0288852	48.8632	8.01116e-24	0.0949062
BH0VaJaHfGG43o1Lq4	NTMT1	0.0773243	0.0165121	4.68289	8.01104e-06	0.0271856
0ECqTqXUl.lRC5dLlQ	SH3BP1	0.199563	0.0170485	11.7056	8.01e-12	0.0402811
EKefAJOBWo5Ikn.uRo	SNAP29	0.228318	0.0223306	10.2244	8.00795e-11	0.0441708
HxN6t3O695J31.v0Io	TMPRSS3	7.13302	0.0940636	75.8319	8.00402e-28	0.332897
xqfqgaC.N_jFfginq0	UBE2Z	0.122571	0.0119876	10.2248	8.00337e-11	0.0261776
WoC3STOgEKX6KIU6E0	CPT1A	0.438575	0.113769	3.85498	8.00113e-05	0.111687
ETe7o7Q4QQXp8XopT0	AP2S1	0.0465316	0.0120704	3.85503	7.99991e-05	0.0157951
upUK7Xkp7Dkvw0i5T8	TMSB4X	0.0410587	0.0106507	3.85503	7.99988e-05	0.0102663
9e1epSSoXeCX3_6X.8	FKBP1A	0.107422	0.0278652	3.85506	7.99912e-05	0.0231763
H11VOByAFHx1SD0rbk	TIMM23	0.0417494	0.00891424	4.68345	7.99897e-06	0.0120107
3lHUoQr0A68QSXcXtk	CD44	1.36652	0.0439164	31.1163	7.99655e-20	0.0806674
xd1nAuhPVTAD7Unl6c	NLGN4X	0.186517	0.0483761	3.85557	7.98734e-05	0.0696791
TgmBAhUkIgpIpwhU1Y	MAT2B	0.313377	0.030644	10.2264	7.9825e-11	0.0574243
lfQSwCH6T6epOunRl4	ZNF69	0.609207	0.0925404	6.58315	7.98165e-08	0.054135
ckt8SXD33_h61_kkvU	IL6ST	1.04262	0.0475877	21.9095	7.97956e-17	0.0798923
le5TV4X6FZeKrhLosg	UQCR10	0.206722	0.0369848	5.58938	7.97813e-07	0.036268
EoKpXUR9eorSIQHv0g	UNC13B	0.496146	0.037165	13.3498	7.9779e-13	0.0950824
N7RuSgS4pKhKr3nX3Q	SLC39A14	0.196007	0.0167407	11.7084	7.97708e-12	0.0387285
rrhKyeoXKc3xTgr7.k	TSC22D1	0.604718	0.0516483	11.7084	7.97704e-12	0.0855888
csh_hjmJfWtLhu4pII	PLEKHA1	0.249344	0.0532273	4.68451	7.97653e-06	0.0773785
0jkhEFPkpUXG6zO0VI	ZNF823	0.336003	0.0221496	15.1697	7.97621e-14	0.0484436
9nqi7tXi07qeDXh.R0	CRADD	0.112716	0.0146786	7.67893	7.97546e-09	0.0314614
Tp3KKy0eJ6F8BE3kok	ZNF451	0.118332	0.0133125	8.88882	7.97473e-10	0.0270051
B1onqf6l3XlRdx93uA	HAPLN3	1.01788	0.0995279	10.2271	7.97381e-11	0.136257
Bfl.4nfnEtl.nHn8Ig	ADCY3	0.161247	0.0137715	11.7088	7.97256e-12	0.0244359
9JYohVmS55QZVrogng	CDC42	0.173099	0.0309675	5.58971	7.97177e-07	0.0330143
rpIgopQglBTQglXQ5c	TCF7	0.370214	0.0361989	10.2272	7.97167e-11	0.0862901
0tXC5Sd1XAL1J03Zek	FBXO16	0.266181	0.0299439	8.88933	7.96732e-10	0.0649762
Kn2jl9iLrmGX37jnd4	BANF1	0.119427	0.0309678	3.8565	7.96587e-05	0.0247928
Zufk46g7h.yR5Ou.qo	IPCEF1	3.49563	0.0513952	68.0147	7.96432e-27	0.144586
TiKVCul2UleSz47ks8	CLCN6	0.258372	0.0551465	4.6852	7.96177e-06	0.052818
rt._UgvAp7dQtXgdJI	ERP27	0.141097	0.0214293	6.5843	7.96136e-08	0.0476989
Bd.ovLdEO1PVcnXuc4	ZBED8	0.216324	0.0461714	4.68524	7.96087e-06	0.0521997
3tLitW4t.uLX7tNvak	PHF21A	0.0791122	0.0205125	3.85678	7.95938e-05	0.0202111
u_Sp0JRQ3OCF0pSquI	PRMT5	0.0507535	0.0108324	4.68533	7.95912e-06	0.0182779
0S44hriOv4tdrl6sko	DCAF4	0.208397	0.0234416	8.89006	7.95677e-10	0.0409558
lkllgASgL6gmqsocR4	MFI2	0.257483	0.0335259	7.68011	7.95665e-09	0.0586621
3lC5T_q0k12.QRLud0	FAM171A1	1.69247	0.0485031	34.894	7.95342e-21	0.147905
61d5xJXqKJSjX763Jw	RTFDC1	0.0289097	0.00749485	3.85728	7.94801e-05	0.0111705
Tovv9pKpft3R5P60qo	RHOC	0.18072	0.0119109	15.1727	7.94799e-14	0.0264019
BlfewJg4o6Gbq4XCn0	MEF2A	0.145994	0.0261121	5.59103	7.94623e-07	0.0429576
0o30vPYqg4pK0JY5yU	LMTK2	0.561616	0.0326687	17.1912	7.94587e-15	0.0895092
Nk693oBmUoAn1uUuPY	FAM90A1	0.63771	0.0717262	8.89089	7.94496e-10	0.118857
iuJ_.u1e6uhuvrj6Sg	UBB	0.0705944	0.0150646	4.68612	7.94238e-06	0.0144532
WYS6fDA.CF.lgXpXP0	USP33	0.144363	0.0308065	4.68613	7.94217e-06	0.0440168
9gOHeqQIVcOBy6SJSg	TCF19	0.227254	0.0255596	8.89116	7.941e-10	0.0503628
lNFaERNOfCPQeokxSo	NOP58	0.0491837	0.0127498	3.8576	7.94062e-05	0.0145453
ukkACtB_ULR55Tu7Hs	SASH1	3.11641	0.0368541	84.5608	7.94035e-29	0.169844
QXnojsD_U4fXooSSTo	ZWINT	0.174179	0.0311509	5.59145	7.93811e-07	0.0332035
BF16jZN6IuXLPeUn2g	RPL32	0.261266	0.0340132	7.68131	7.93747e-09	0.059648
u5NO51xXncWf96tEik	FCGBP	0.429275	0.0482797	8.89142	7.93731e-10	0.080816
BSwYp.47vieiuLoWqk	TRAFD1	0.332509	0.0219125	15.1744	7.93134e-14	0.0435273
fgPeXihJJUufpiL14Q	UPB1	1.8156	0.093432	19.4323	7.92934e-16	0.134374
3XUk9LUqolGgFO9_fA	UBE2L6	0.242087	0.00981155	24.6737	7.929e-18	0.0241963
HkwCWqdeP1K.cAKB4o	NMNAT3	0.474198	0.0617296	7.68186	7.92875e-09	0.100274
Zz5Cu463p_rg.SqA4o	HOXC4	1.0852	0.0248155	43.7307	7.92601e-23	0.0892577
xJv67xfdeorXnkHQvU	ELMO1	0.0861368	0.0223251	3.8583	7.92458e-05	0.0233205
HWXXhblfYgk9R.snpQ	PGLS	0.146146	0.0124773	11.7129	7.92396e-12	0.0283826
WogDUFJ30ogkZTgEpY	PFDN5	0.0485809	0.00737588	6.58646	7.92349e-08	0.012306
xeEedZNee7te9TvWvU	NUCB1	0.125781	0.00941825	13.355	7.92269e-13	0.0188871
0npZXr0z_L8PseFehU	CYTH3	1.11994	0.0453867	24.6754	7.91783e-18	0.11964
6V1UodUc_Xe4_lSigA	LMF2	0.0936202	0.0142133	6.5868	7.91757e-08	0.0305162
EQ.d6I4XIOSKDJdd1Q	CT45A5	4.40104	0.126097	34.9021	7.91601e-21	0.260414
HVQLQkIhy_CoveqUp0	CD53	0.100752	0.018015	5.59266	7.91481e-07	0.020527
cVFFf.ClLwcxxLQxbo	RSRC2	0.285696	0.0371864	7.6828	7.91384e-09	0.0582982
iW7u1L8Sbd5Vcm7.uE	ADARB1	1.62951	0.0743418	21.9191	7.91257e-17	0.18552
cQd0kXtO1dLIHvgFCU	TSPAN12	1.29179	0.0211849	60.9771	7.9119e-26	0.115941
ZS0hXXhRP6N3oEnTZY	ERCC1	0.0382403	0.00990943	3.85897	7.909e-05	0.0163249
TFxV5AN1z1SxJSxe0E	TGM5	2.44781	0.125947	19.4351	7.90748e-16	0.21464
xdNBGA0qSEgvJ2vQZU	GIT2	0.22419	0.0191381	11.7143	7.9073e-12	0.0510132
uAA3BHpxVnahV9RnuA	FAM104B	0.114021	0.0243225	4.68789	7.90507e-06	0.0458197
lnxCeHgiilejtJhR.U	DNASE1L3	1.4491	0.0296355	48.8973	7.89608e-24	0.102608
6B6hRUz9LKF6sqPoLE	ST13P7	0.0993992	0.0150874	6.58823	7.89264e-08	0.0290356
WnsDJ3kpQrJTLCC16I	HIST1H3E	0.154803	0.0330174	4.68851	7.89184e-06	0.05023
Tid4J.g09LrojpfesE	SARAF	0.0754749	0.0160974	4.68864	7.8892e-06	0.0167757
uO7tSXg9R5ohX55GF4	TNFRSF18	0.829861	0.0708319	11.7159	7.88864e-12	0.128748
uqh7e05einfaRH1U38	LRPPRC	0.0874184	0.0132684	6.58848	7.88824e-08	0.0233478
cFS454rTueg57P6FEQ	LPIN1	0.367312	0.0188967	19.4379	7.8863e-16	0.0376953
0tQnuXYRNdNVJOoRdA	ICOS	0.70629	0.0465296	15.1794	7.88418e-14	0.113596
QElrAaDRs69.e6t7pE	DEF8	0.594953	0.0271377	21.9234	7.88237e-17	0.0615774
9l1IJQBTl6N1TJ91.k	ITPRIP	0.212906	0.0277046	7.68485	7.88142e-09	0.0382142
HuHnp3tF00B6O4VOWU	ARHGAP17	0.246596	0.0184586	13.3594	7.87655e-13	0.0286618
rCCa.X6ifeXW6l3SVk	CLIP2	0.16007	0.0208281	7.68532	7.87405e-09	0.0348628
lxkIKI9EiIYlSinh4k	AUP1	0.0620324	0.0132282	4.68939	7.87338e-06	0.0209983
WqCXobedHojhG5uq74	SNHG7	0.696684	0.0358384	19.4396	7.87336e-16	0.0573785
lP5emhz_b7ul8v78_E	RSBN1	0.113453	0.0172176	6.58937	7.87279e-08	0.0274618
uuJ4hIwiDF_t0XNeV0	CASP7	0.26113	0.0556842	4.68948	7.87164e-06	0.0492323
Nd91eTR709EOAryggk	SDHAF3	0.0999581	0.011236	8.89621	7.8687e-10	0.0215979
um0iUnihKfl6H3sIyg	ACKR3	1.69368	0.0772469	21.9256	7.86747e-17	0.134446
HeDqroXpPzelABKJSI	PRPS2	0.0957726	0.0124604	7.68615	7.86102e-09	0.0228748
ZwCyxCXyUpGunRl7DU	C7orf55	0.670637	0.101764	6.59011	7.85988e-08	0.0635222
KH31Nd6A0nusCyXgJQ	ARL17B	0.112159	0.0239142	4.69004	7.85988e-06	0.0406461
Elt5ZXKfXh1PL1hH7g	PACSIN1	0.540852	0.046154	11.7184	7.85965e-12	0.102734
0V.iL1ELrLIuvwbf10	TOR1AIP1	0.0613719	0.0130854	4.69011	7.85849e-06	0.0195966
WNOUeR1JepBInId7dw	ANXA2P2	0.0675124	0.0143941	4.69028	7.85486e-06	0.0131725
iKl6Ke4iOKThxwq.qs	OXTR	1.06582	0.0342217	31.1446	7.85242e-20	0.0681793
3eUffU5UigSUC8dC3o	TRDMT1	0.286092	0.0609917	4.69068	7.84652e-06	0.0816589
HVRNhyS8dP591c7VeE	MSL3	1.47236	0.0241363	61.0017	7.84522e-26	0.0878819
KXum0tkud6UEcySp88	MMACHC	0.198238	0.0422614	4.69077	7.84464e-06	0.0455222
iWeAeV6Ipzeed9T8VE	CDC14B	0.39436	0.0704675	5.59634	7.84437e-07	0.0887569
QYlur3niyuidPn91Cc	ITM2C	0.479587	0.0194261	24.6878	7.8406e-18	0.0421259
rXe5eL3V77dAmsVNdU	KCNMB1	3.92312	0.0802025	48.9151	7.83665e-24	0.225435
EANqUrmOnRk7DVJH_o	LOC728903	0.666969	0.142176	4.69116	7.83645e-06	0.0650491
6n4zDDx8O6WpGunRF4	CHRNA5	0.718142	0.10895	6.59148	7.83617e-08	0.0653765
cV5eIryfXEzCdf_z6E	METTL21A	1.30516	0.0298283	43.7557	7.83314e-23	0.111806
Q3wUnion7EEXzs56_o	CLHC1	0.241245	0.0313796	7.68795	7.83271e-09	0.0534899
uhfkPyDQkriEqILOXk	EVI2A	0.42683	0.0416904	10.2381	7.83121e-11	0.0487216
uSreR7gdV6IwsLUfyA	ST8SIA4	0.175116	0.0373267	4.69144	7.83063e-06	0.0439346
QrrOngQomkhB0qIB0o	MTFP1	0.156996	0.0238168	6.59181	7.83057e-08	0.0253527
QL7MM5_wKeKuJ7N6OU	MCM10	0.113693	0.0203128	5.59714	7.82918e-07	0.0270085
H_3yAzu7Mp6ua6dOXs	ZNF549	0.636696	0.11375	5.59732	7.82581e-07	0.0492446
i3nnejp4KdepTfTuec	SRPRB	0.189785	0.0404513	4.69169	7.82549e-06	0.0325618
xdBE_.1T.F1HFx2UhA	PGAP1	0.161276	0.0417526	3.86265	7.8253e-05	0.0584326
HuVTneE03R13UuHO3k	CCDC171	0.267074	0.0260847	10.2387	7.82303e-11	0.0622397
fvorTwbx_xDntHu4TU	SLC39A10	0.341045	0.033309	10.2388	7.82187e-11	0.0683979
WUR0n9VyToQj.SU._U	CEP41	0.0737864	0.0191014	3.86288	7.82002e-05	0.0318453
BFFed36XURKDc6l9Eo	PLEKHG2	0.136396	0.0243648	5.5981	7.81095e-07	0.0440741
ZRVxVUBxXfXqAsPniU	PXK	0.294479	0.0193893	15.1877	7.80558e-14	0.0638097
oj.o91F1VS3eReo9J0	C1orf198	0.146545	0.0312285	4.69266	7.80524e-06	0.0547678
ZkucSTsQgt0qjUgeSU	MGC72080	0.174586	0.0148924	11.7232	7.80439e-12	0.0394602
xopB7pPn18FJ067uDs	ZZZ3	0.0547213	0.0116609	4.69273	7.80374e-06	0.0194488
THIgk2JxKIq659YflI	RNF113A	0.143611	0.0371695	3.86367	7.80216e-05	0.0336926
x7R527rdSQqPamCEBo	CXXC5	0.230918	0.0225493	10.2406	7.79952e-11	0.0290448
3uIV4dICBR_VEtSEjo	TUBGCP5	0.13412	0.0203406	6.5937	7.79797e-08	0.0347696
KCu5IRCxieOiUdNaSY	HLA-DPB2	0.664035	0.0746006	8.9012	7.79797e-10	0.116862
HoBSf3rwrwRSOuVdPo	TSPAN3	0.205997	0.0135626	15.1887	7.79654e-14	0.031307
fSXqQTrgFU3MQAdpCk	CCDC125	0.487455	0.103865	4.69316	7.79495e-06	0.0590277
NqbdUs8V6OMoPh1puQ	CREBBP	0.115704	0.0246531	4.69327	7.7925e-06	0.0273478
Tch.x7KS3l1LVnXBR4	FMNL3	0.328271	0.0132926	24.6957	7.79157e-18	0.0520035
fXp9fn0g_A6C6q7Vx0	CHCHD2	0.0930997	0.00909059	10.2413	7.78986e-11	0.0153783
BVIKgJ7FL5wXt_.SiU	KCTD3	0.304212	0.0227571	13.3678	7.78941e-13	0.0512486
6u7FOec_031_D3_bqk	HIATL1	0.148779	0.0384988	3.86451	7.78321e-05	0.0429533
6eUFFDoJLLpLBJJev0	PIAS1	0.117983	0.0153396	7.69139	7.77905e-09	0.0255069
3AuiSKCeegC7lOFneI	CCT7	0.103729	0.02684	3.86471	7.77869e-05	0.0241803
3v0R0nE7hdSfrivl4I	METTL13	0.0721826	0.0153778	4.69395	7.77843e-06	0.0197086
NkooiYR_3qKQOt.44Y	BCCIP	0.0673237	0.0174196	3.86483	7.77604e-05	0.0190379
loI5Vh9.pS46oNLi50	XPNPEP1	0.114302	0.00752439	15.1909	7.77563e-14	0.0205108
TI1EnCEUoVeglyA6hQ	ZNF93	0.483509	0.0412347	11.7258	7.77482e-12	0.0837628
KeyPr9TEqC91tc5Dv0	SCML1	3.81489	0.06251	61.0285	7.77329e-26	0.211398
lleo9w313kHt9Sh8ek	PTAR1	0.23348	0.0354002	6.59544	7.76804e-08	0.0459541
KnsQ5e474oq9..Auzk	HOMER1	0.315385	0.0563135	5.60053	7.7651e-07	0.0759468
fp1dOCsgUnnvhFivE0	PTCD1	0.0554199	0.00989522	5.60067	7.76236e-07	0.017735
EnQtQNeU4Xd7HcoFSo	GEM	0.750219	0.049381	15.1925	7.76116e-14	0.111227
u55QF4qe6roOJ6CluM	PCBD1	0.342148	0.017587	19.4545	7.75919e-16	0.0457668
BuImZn5oZppPAa_Smw	PCNA	0.165862	0.0353273	4.695	7.75672e-06	0.04481
39RL1ol9LiqycTlU5c	RNF144A	1.68215	0.0307684	54.6714	7.756e-25	0.120029
l94e1KJw3hb3Pu6OFE	MAP2K4	0.0457505	0.0118349	3.86573	7.75587e-05	0.0194385
ue59Hq.dBbp.0WSft4	ILF3	0.258641	0.03921	6.59629	7.75348e-08	0.0437177
614QCoRMu.sEW1BPX4	NR4A2	0.656785	0.117254	5.60138	7.74895e-07	0.109845
fp5_IblluURfVwffeM	C19orf44	0.109628	0.0283562	3.86611	7.74724e-05	0.0412833
3ZI6Kh14TJSee4DDoI	CDKN3	0.188965	0.0488766	3.86617	7.7459e-05	0.0341758
N1URGXORAbo82RIeoo	LHFP	0.451591	0.0262325	17.2149	7.7446e-15	0.0632188
BerWUlVKgqnouj6oDc	LOC642131	3.20552	0.115446	27.7664	7.74425e-19	0.188528
WgE3lTuz46SJ75UQmU	SEC22C	0.0466404	0.0099327	4.69564	7.74369e-06	0.0177521
6f716oPR9311dOgjkI	MAX	0.494984	0.0643359	7.69376	7.74235e-09	0.0844674
00buPhOysV5Rpc5VF4	MKL1	0.125248	0.0266726	4.69573	7.74169e-06	0.0412034
Z5EcikrXdrXdTXufe4	TBC1D5	0.16082	0.0209024	7.69383	7.74128e-09	0.049913
0eV7n7qeQurdQwuvU4	P4HA2	2.95779	0.0948995	31.1676	7.7371e-20	0.164305
xWypO69AiCSipCoC8U	CORO1C	0.146466	0.0311894	4.69603	7.73554e-06	0.031535
fUQLhQgbiQlSkSWGWY	RPL36	0.0480837	0.00624933	7.69422	7.73518e-09	0.0115071
uSRY1YTI0uG3.30jjU	LINC00467	0.101142	0.0261572	3.86669	7.7342e-05	0.0305237
iU7tU3QlEiQdEqx9EU	SLC15A4	0.280866	0.0274118	10.2462	7.72834e-11	0.0326505
HMDr0a1HpZfu_eiG6o	SLC35C2	0.0908038	0.0137626	6.59784	7.72698e-08	0.0262463
T8VSWtQXjXu1T7CiCg	ITGB1	0.395825	0.0260476	15.1962	7.72652e-14	0.0553557
0F1BV51REuEhaAuCLQ	KLF10	0.22507	0.0292481	7.69521	7.71992e-09	0.054732
HneP1qkl.SOaSExBF4	CERK	0.272486	0.0179304	15.1969	7.71975e-14	0.0397431
rvSXzV_kbASHHIfPso	IMPA1	0.157521	0.0238729	6.59834	7.7185e-08	0.0310401
WS_7k3f1L.k1Lht5_k	RPL34	0.311775	0.0142051	21.9481	7.71344e-17	0.0361037
lA_eff9V0Exd7iFo90	ZBED9	0.262306	0.0468127	5.60331	7.71279e-07	0.0741436
xpBLlSp3ju3dGm4C7g	HLA-H	0.114832	0.012892	8.90728	7.71271e-10	0.0173576
WQon_nMd3XVhVRXpMc	TEX261	0.125022	0.0223118	5.60339	7.71125e-07	0.0383531
HHUKlAnQOVFMgYe1OE	CASP4	0.265878	0.013662	19.4612	7.70914e-16	0.0332317
cXQU1KA_Eunks_HUuE	ASCC3	0.0973123	0.0207164	4.69735	7.7084e-06	0.0238836
fnVfddSC.UJNSQeLDk	FAAP24	0.0917449	0.0237194	3.86793	7.70648e-05	0.0380981
igXug_iilP0dXgVJeE	CCL22	5.0945	0.13016	39.1402	7.70038e-22	0.11848
T1F6U.4V4uhLRJdJ04	BCAS3	0.488108	0.103902	4.69775	7.70017e-06	0.116455
fp3_eev4PoRHnmnXXk	BRF2	0.188693	0.0336709	5.60405	7.69902e-07	0.0444125
WrWmVInBqLVK8BH8I4	HSPB11	0.155049	0.0174049	8.9083	7.6985e-10	0.0258688
3.d4LruoLFKoekglSk	DHTKD1	0.129864	0.0110688	11.7325	7.69839e-12	0.031792
BorV5S78giXh7vS5fo	WFS1	1.26127	0.191111	6.59965	7.6962e-08	0.112743
QqkqH0ez.vTLs1UiXo	PLD1	2.01231	0.057575	34.9511	7.69476e-21	0.120518
0VX7Th3i0bnns_Qbko	TCFL5	0.895921	0.0228889	39.1421	7.69275e-22	0.0743181
ED5fq15ZEiaXt.NIrU	APOBEC3F	0.166125	0.0353593	4.69821	7.69084e-06	0.0397766
3Ztd.fqgvii5X0iUsk	SHMT2	0.107776	0.0163297	6.60002	7.68997e-08	0.0194113
cR9RTs8Qt_FTV7bB1I	XPR1	0.125722	0.00730029	17.2215	7.68941e-15	0.0259815
xnTT3qL9TsunOS7oC4	STXBP5	0.17536	0.0265693	6.60011	7.68852e-08	0.0415241
cSXdQq.0XyQQ6ie6i4	TOR1A	0.124241	0.0188236	6.60026	7.68587e-08	0.027805
WwAVaCpoRdRNl.5Rf0	SLC38A1	0.264401	0.0562701	4.69878	7.67911e-06	0.0653054
iqt3lJ6C5_nUfJJwHw	MGST1	0.218034	0.0563517	3.86917	7.67886e-05	0.0697597
Hm4Kedp0f9cLuvXgp4	PCID2	0.0287556	0.00611969	4.69887	7.6774e-06	0.0111403
3oeDevdd_xFXQVzkl4	SUV39H1	0.0922195	0.0238336	3.8693	7.67599e-05	0.02393
WWCft1Dt6H.69TepVk	KIAA0922	0.1243	0.0188307	6.60093	7.6746e-08	0.0242714
csuJYj5lPkdSdKQQiQ	PNPT1	0.403558	0.0858796	4.69912	7.67229e-06	0.0375646
EZ6.7RPSTzUpNKQTe0	EEF1E1	0.090774	0.0234584	3.86957	7.67013e-05	0.0213026
9KKxIa6KOq7_E1H7DI	RASGRP2	0.265396	0.0226158	11.735	7.66979e-12	0.0622841
lRSdQuKb12m14FQKd8	HIST3H2BB	0.328696	0.0699464	4.69925	7.66957e-06	0.0903164
HqKvflISBxL1Pt2634	CHD7	0.218888	0.01636	13.3794	7.6695e-13	0.0357121
foSe..BXfeQv74XE6k	ATP6AP2	0.0907585	0.0137479	6.60163	7.66266e-08	0.0183873
05XeX4.r6D.5wPrDvk	FAM135A	0.123965	0.0263775	4.69963	7.66177e-06	0.0421495
uepygIiBCQlqnF5VSs	DEF6	0.148499	0.0264882	5.60624	7.65821e-07	0.0310406
HJy6k7gjPy0VIolLA4	ZNF302	0.119997	0.018176	6.60195	7.65727e-08	0.0257932
uUErWUDWggjjoDThWI	RPS3A	0.0357689	0.00761052	4.69993	7.65577e-06	0.0099647
cRXyV9IwlyUsTP0kSk	FCRLB	0.310854	0.0264866	11.7363	7.65535e-12	0.0455496
3deudXerVXr77JJ8Hs	SOCS1	0.748411	0.0559315	13.3808	7.65508e-13	0.0833344
i1GgEgdjkeF51lKAuI	PRKCZ	2.56917	0.0924709	27.7836	7.64985e-19	0.199488
ld.ooJU8dbB4ejrUu0	RNF14	0.0956244	0.0203442	4.70032	7.64773e-06	0.0305002
9cXeUALqp7Hqh52jjc	CERS2	0.11588	0.0175504	6.60268	7.64502e-08	0.0320765
6uN9Nx5mtCpRap9S98	TMEM134	0.174952	0.0130736	13.3821	7.64274e-13	0.0366774
QrqfR6IDofHkDnuO.c	YEATS4	0.123678	0.0263107	4.70066	7.64097e-06	0.0277813
6C.uqlAXqFWJ9drJIo	FUT7	1.21848	0.2173	5.60738	7.63709e-07	0.15234
lroSr3SxwkKISDn_9c	ANKRD29	1.05013	0.0268181	39.1577	7.63032e-22	0.111119
TlL141TdHd6FxSuHnk	COL9A2	0.360401	0.0269285	13.3836	7.62681e-13	0.0483638
ckVlv.vS3FR3SrBDl0	LPAR6	3.64042	0.0385637	94.4001	7.62458e-30	0.152208
ltI3VdRSUo119ydN7I	TPR	0.0629016	0.0162468	3.87163	7.62438e-05	0.0197956
BZIHS4KCdW4IOiuYUU	ERCC5	0.113991	0.0148011	7.70153	7.62298e-09	0.0244834
ouS1E7kwoU6on7P6g8	NSUN4	0.122708	0.0185807	6.60406	7.62172e-08	0.0275821
KCV7vXqgnqh_oLjq7s	DUSP2	0.326358	0.0842907	3.87181	7.62049e-05	0.0436371
Q5LiSI0QT5H0l64TiQ	BMP8B	0.307962	0.0655005	4.70167	7.62046e-06	0.0839268
9p9edCEWPWcT1FQRFI	RBBP8	0.0586042	0.0124645	4.70168	7.62023e-06	0.0178814
lppUluz8.9FzdfXtCk	ADAP1	0.483927	0.0361556	13.3846	7.61741e-13	0.0766381
QZJ1UNEckE.QufiJTk	SPARC	0.651649	0.0296708	21.9627	7.61508e-17	0.0980483
x11MT_Ent6lfOiTEug	NAE1	0.209465	0.0445482	4.702	7.61382e-06	0.0678981
HuFNHoSf3dAH9fQZTo	FAM69A	0.401859	0.0206357	19.474	7.61329e-16	0.0476023
06TJxbi90koH1SY4w4	ALDH5A1	0.544706	0.0220306	24.725	7.61273e-18	0.0607051
ZoTigHqc4R6l94xEq4	B9D1	0.537356	0.0602786	8.91455	7.61208e-10	0.0963607
x1GWiLBygTrILoiLVo	ZNF79	0.258899	0.0461595	5.60879	7.61093e-07	0.0586032
KO9.UFXlE707tcLfX4	TPTE2	0.797903	0.0679627	11.7403	7.60981e-12	0.107326
6lPl9z1xF.1yqnrVp0	NAGK	0.291437	0.0117869	24.7255	7.60954e-18	0.0341256
xUrHKin.gVKKSK_SYk	SYAP1	0.397392	0.0338479	11.7405	7.60755e-12	0.0498746
xQox.DNS5a9IdFzukU	ATP7A	0.352173	0.0180833	19.4751	7.6053e-16	0.056984
xaRtfpt3Dt5J0KnpH8	LAMP1	0.217183	0.0162248	13.3859	7.60401e-13	0.028563
Ku.kHqiEgHuvjJS0eU	MYB	1.01756	0.0366129	27.7923	7.60213e-19	0.0669025
EknPgK8ep1SU0yST94	UBQLN1	0.0956947	0.0124232	7.70292	7.60181e-09	0.0234615
KblNiOibpB9ooJ9kr0	HNRNPM	0.1415	0.0300894	4.70266	7.60042e-06	0.0250926
c3ezqQKce017763qlE	RPAP2	0.085129	0.0128874	6.60562	7.59562e-08	0.0282512
xJCOCV3tnVIRV3FBJc	NDUFAF4	0.258443	0.0667303	3.87295	7.59536e-05	0.0453806
NHnpJp.ez3lEUqkjv4	USP32	0.250445	0.053253	4.70294	7.59483e-06	0.0699149
NmmkE6aG4wO0u4F6KU	MED27	0.166827	0.0297391	5.60967	7.59464e-07	0.0378986
xUel1HSl1N905XfFLM	COL4A3	1.87917	0.0676101	27.7942	7.59222e-19	0.158096
Zn14qyI_zf.m3kQ6ck	RORA	1.02358	0.0672906	15.2114	7.58682e-14	0.102743
uemnSNkU_XGAECV450	LGALS3BP	1.61028	0.0826731	19.4776	7.58632e-16	0.18162
c96ESCz_4SpAlQRfVU	PTPRC	0.642222	0.0833611	7.70409	7.58408e-09	0.104184
6RqbXHiT464o6T7Wzo	SUPT5H	0.118031	0.0132369	8.91684	7.58064e-10	0.0268095
lXorniFQmo4SEnIj5A	IFT122	0.0889293	0.0229559	3.87392	7.57424e-05	0.0414871
TofSgA0FSRSScUFFPU	ZFP36L2	0.327108	0.0582942	5.61133	7.56419e-07	0.052534
l6KU4uK4CXjv.VpS74	VPS33B	0.0463104	0.00600993	7.70564	7.56064e-09	0.0182915
ct43aCcJKtqXryx_ho	RNA5S9	1.83152	0.277178	6.60776	7.55984e-08	0.111392
o4O7F4LZFGiJGIhWL0	COX6A1	0.0953856	0.00712346	13.3903	7.55896e-13	0.0179812
ouU0YUU0Ndn9CKSEtU	ITGB7	0.420824	0.0276595	15.2145	7.5589e-14	0.0379868
HvXZMzb7kSjQTjrh6g	BORA	0.0622764	0.0094243	6.60807	7.55478e-08	0.0183384
riguY2oF1zMfW.l2a8	RPL36A	0.293755	0.0523455	5.61185	7.55471e-07	0.048282
i7XkuXqGVbLgi47pUA	SNHG7	0.273389	0.0581053	4.70506	7.55204e-06	0.0707041
cvYiWLe6kd3l9ORe18	CD81	0.069646	0.00404017	17.2384	7.5505e-15	0.0125885
xrxZO2euCKK.lEqOxc	FCHO1	0.18862	0.0211477	8.91917	7.54884e-10	0.0504962
BWgLcUJ7mkQwJRoAQo	GPR65	0.259434	0.0392568	6.60864	7.54523e-08	0.0503424
WrI7P01ciStJdfVcOY	SLC18B1	0.492081	0.0198929	24.7365	7.544e-18	0.064784
6VQofeoEor24T2icXg	PCK2	0.12384	0.0220643	5.6127	7.53914e-07	0.0262609
xVb14TRJJdQRCnUIXI	CD74	0.0758652	0.00566474	13.3925	7.53692e-13	0.0129584
BdJt1U56nRxOpSV_dw	PFKL	0.0768083	0.0198175	3.87578	7.53356e-05	0.0238223
HIIV4VHir__4g_eCUY	ACAD11	0.311348	0.0661594	4.70603	7.53257e-06	0.0456766
fpizEUNKIqyeXkyiXY	PTDSS1	0.0453135	0.00807228	5.61347	7.52498e-07	0.0140865
ipuBoOoq_3JO1LOLro	HNRNPH1	0.265327	0.0344221	7.70803	7.52465e-09	0.0303086
ouJEVE.0eU83qEkgUo	CHI3L2	9.17005	0.0703204	130.404	7.52265e-33	0.205904
BqXVILpAFUn0NKAUV0	GAS2L3	0.178523	0.0318018	5.6136	7.52258e-07	0.059669
WgoqUI6ASIhS4op97o	TRMT12	0.105069	0.0187165	5.6137	7.52084e-07	0.0275658
cdU6bv6M3nl7rSgX5E	ATPAF2	0.0747895	0.013322	5.61397	7.51592e-07	0.0327181
0QXuO6kiOKUIGiCook	PEX11A	0.42399	0.0360878	11.7489	7.51463e-12	0.0671657
Z6oT_UHYECniCSURb4	RLF	0.241302	0.0512646	4.70699	7.51348e-06	0.0465002
6XY3xT6X9V6UstRdLI	SGMS1	0.640411	0.0230288	27.8091	7.51171e-19	0.0857393
3T0lwrUWUKRTaEReVM	TCF19	0.236776	0.0201527	11.7491	7.51159e-12	0.0528665
B6KklUShr84kRDzJ_8	CAPN2	0.38446	0.0327222	11.7492	7.51088e-12	0.0801007
359TSD1KtElUEgkkuU	PITPNA	0.117217	0.0131377	8.92216	7.50814e-10	0.0370414
ZXqR_l.t53S7fV.hOo	DHRS11	0.148735	0.01667	8.92236	7.50547e-10	0.0453572
6KiMMn9UVx.uStMXVQ	ATM	0.141965	0.0159111	8.92236	7.50545e-10	0.0261737
lt.5d.7xUr2NCqHo5U	MED14	0.0898976	0.013598	6.6111	7.50449e-08	0.0270927
0gZMaTvDh3jrtdd6kk	NDEL1	0.0612059	0.0157861	3.8772	7.50265e-05	0.0174204
xXl7eXuF7sbPEp.KFI	TRIM44	0.0873504	0.0225287	3.87729	7.50058e-05	0.0230844
fSpP_tQvufNUyUoB3k	IL1A	5.02769	0.0660972	76.0652	7.5002e-28	0.211502
9lTN2w7t7tR8iXRhek	EFR3B	4.77442	0.0871882	54.76	7.49849e-25	0.243397
BdfkNO6EUNEAsCV674	PKIA	0.0967506	0.0205514	4.70774	7.49847e-06	0.0323742
NE1PefUZOn3lPr3fVU	NGRN	0.1291	0.022992	5.61502	7.49676e-07	0.0404206
lUpFHJenQM9VKiHnu4	SORBS3	1.0241	0.0465912	21.9805	7.49665e-17	0.123529
KoCewdGCV4hecVcI2I	RNF10	0.15445	0.0233603	6.61163	7.49562e-08	0.0416763
ckLEgoNz3SSpMqRkek	YEATS2	0.149741	0.0266669	5.61523	7.493e-07	0.0306417
3QKRL8ij6qCogYFSok	NDNL2	0.250836	0.0379376	6.61181	7.49275e-08	0.0550992
Bo.eJO5IetycvUoHrk	PTBP2	0.128525	0.0331433	3.87787	7.48803e-05	0.034938
3jsLpUVQ.7BOOQu3pE	PDS5A	0.0539577	0.0114602	4.70828	7.4878e-06	0.0191151
Wnte91N1P31TnsFUp0	PATL1	0.100061	0.0112129	8.92371	7.4872e-10	0.0208821
6JASaRjql.fNYiLiJk	GRB2	0.158434	0.0408556	3.87792	7.48713e-05	0.0322758
o4KOUIOIAJCq.tSulU	CRTC2	0.176219	0.0197471	8.92382	7.4857e-10	0.0375042
ZXSYrSYhRIiRI7QoSc	NAA10	0.105897	0.0188575	5.61564	7.48552e-07	0.025118
c94iSk_ze37_u8T6RU	DNAJC15	0.426319	0.0247193	17.2464	7.48524e-15	0.0511696
ZrCHlEtVSopEe7.Hj4	SLFN5	1.80014	0.0410497	43.8528	7.48395e-23	0.141724
cZ3e3p7G3rvdDn.ckE	GAD1	1.70145	0.0544997	31.2195	7.48328e-20	0.179179
ir_h054gFRKAke1Kyg	MFAP1	0.0835244	0.014873	5.61583	7.48206e-07	0.0220293
u6BXVx3hVcSEFCRw1U	YDJC	0.117184	0.0248872	4.7086	7.48144e-06	0.0360249
or6rqfoESu7Em57LoI	ERH	0.0982097	0.0253233	3.87824	7.4802e-05	0.0196397
HbqiKmwPt_4O7nBQBU	HIST1H3D	0.637069	0.0326824	19.4927	7.47589e-16	0.0815834
0hRBOKUeiGTOLCpHho	BID	0.317573	0.0237016	13.3988	7.47465e-13	0.0427432
rl.q65L1dYITgOHRHo	ZNF101	0.0971412	0.0250449	3.87868	7.47053e-05	0.0391611
EpRLux56DvU1AI7J9I	SCAF11	0.0561872	0.0100038	5.61657	7.46876e-07	0.0162769
flQJu581Cq9Jz14fRo	MAP6D1	0.0904784	0.023326	3.87886	7.46667e-05	0.040408
QukxEiSW7kgU4wVQOo	ABCB7	0.0901755	0.0160549	5.61669	7.46653e-07	0.0222342
lhXEuXqnWfEMtdXe9c	RPUSD3	0.0783736	0.0139531	5.61692	7.46239e-07	0.0215851
QXiUguq58x1QF_LtSU	MARCKSL1	0.33582	0.0327064	10.2677	7.46148e-11	0.0331096
T_bfHe90mEvl57Swno	SNORD16	0.328311	0.0425695	7.71234	7.46024e-09	0.0532055
KkCW8s3nZNUfxNIvSE	ZNF195	0.0773194	0.0164172	4.70967	7.46009e-06	0.0255813
WhXUieoBcUQjcC96e0	CLDND1	0.0706888	0.00791963	8.92577	7.4593e-10	0.0164923
EWX22SIXfnq.QQG5T4	ITM2A	0.822983	0.0209937	39.2015	7.45808e-22	0.049935
0eKzAzLe6i4ikBS1xU	HLTF	0.138971	0.035824	3.87927	7.45782e-05	0.0395451
oV3gR9T7zlFSAXHovE	ITM2B	1.51192	0.0159994	94.4985	7.45705e-30	0.0709744
coIgFKiVf448PRfUu0	IL10	1.60453	0.072977	21.9867	7.45583e-17	0.138885
ZbnsZYTQjog6gtQqu4	HNRNPM	0.13468	0.023976	5.6173	7.45551e-07	0.0221493
ZSoLr4Vda6elHeci1M	WASH7P	0.374383	0.0279375	13.4007	7.45544e-13	0.0710714
fJyXPzrz2.ywve6iQo	SNX24	0.319489	0.0678334	4.70991	7.45541e-06	0.085366
ol6DSDR6cLfnn59_dI	LINC00339	0.41011	0.0186526	21.9868	7.4553e-17	0.0591928
WrV7vs.7Jf9ep9J1XE	CNOT1	0.032028	0.0068001	4.70993	7.45497e-06	0.0115612
rST4glD0UqFI557xaU	COPB1	0.0531396	0.0136978	3.87941	7.45481e-05	0.0153277
xFL_rhKnrAtUu8ji4U	PDGFD	0.827592	0.0543533	15.2261	7.45383e-14	0.12465
Z1bpf1V.pJFjoo4eog	RSG1	0.106955	0.0227077	4.71008	7.45197e-06	0.0431759
Hk3WKcxF4KBL.hbWlU	NOA1	0.10161	0.0075822	13.4011	7.45168e-13	0.0204243
Kwgz0QT4FSimifkuJY	ZNF652	0.61793	0.0934228	6.61433	7.45118e-08	0.0527711
0eL0eWt7fWJ5ve1_04	PKMYT1	0.137542	0.029201	4.71017	7.45023e-06	0.0445489
cu6ef6frgle7rI_hNE	ZDHHC13	0.0934982	0.0198502	4.71019	7.44982e-06	0.0306191
rmX0CK4J7aHECoLG60	PRDX2	1.24528	0.0163659	76.0899	7.44882e-28	0.0743889
leXnk3.e_VTUWUn1fQ	STAT6	0.128725	0.01442	8.92683	7.44513e-10	0.0276847
xRJygl8AO056z6nEFo	LRRK2	3.59051	0.0471861	76.0926	7.44314e-28	0.171195
x07tL.REl5E294Tlf8	TMEM19	0.225369	0.0401147	5.61811	7.44085e-07	0.0443924
6p1QpTggjsQpuXQsVY	STARD10	0.170963	0.0362922	4.71073	7.43906e-06	0.0415054
Z56L7qk1dQpeHV.Rxc	ANKZF1	0.363119	0.0548915	6.61523	7.43657e-08	0.0554313
9niJ6n9d7hTVpewTN4	GAS6	0.976327	0.0565903	17.2526	7.43586e-15	0.135383
o1z4otBJIo4o5BE34I	TAF1D	0.183027	0.0471676	3.88036	7.43439e-05	0.0427364
N8EYzSRPV_000K76dI	ARL5A	0.0489347	0.0126105	3.88046	7.43219e-05	0.0158942
xhTWAXm1euO90JdoLo	HSBP1	0.369246	0.00941724	39.2095	7.42686e-22	0.0426452
9ogng5BAT4nJRLkl6U	PSMA5	0.0559883	0.00846256	6.616	7.42391e-08	0.0131037
N.Wut9W_6iSuirohcA	ZNF524	0.205555	0.0230219	8.92868	7.4203e-10	0.0439814
uNk5CT4XFEXE1R7l5M	PPM1A	0.216054	0.0384487	5.61929	7.4197e-07	0.0535322
NQKCV.IPIt_KhJHBKU	PRKRA	0.286498	0.0243668	11.7577	7.41717e-12	0.0351745
BHeQIk3nkVCXiWvXvQ	PDLIM5	0.126974	0.0225955	5.61946	7.41661e-07	0.0502993
fueRH8SSfX9.U6R5cs	AP1S2	0.404034	0.0129359	31.2335	7.41615e-20	0.0365617
9X1L7fgSXh16SVzoL0	NBPF9	0.390389	0.100584	3.88124	7.41554e-05	0.0487418
uqvDn.oIIE5Y14p.p4	KIAA0368	0.105586	0.0224082	4.71193	7.4155e-06	0.0244833
HpSYoruoTDJeLn6vFM	ARHGAP19	0.122619	0.0137326	8.92904	7.41542e-10	0.0265811
WUeXQjlQjdeUAQqLbo	CETP	1.45189	0.0464846	31.2339	7.41452e-20	0.141288
fdpVJc.Vl1P479Sv9A	RER1	0.0873839	0.0185448	4.71204	7.41323e-06	0.0258171
9iFJelBOuAVl3HgDEA	RAMP2-AS1	0.516843	0.0919688	5.61976	7.4111e-07	0.041929
uV7ued.rpMIKh6e7z0	SFT2D1	0.0637785	0.00418741	15.231	7.41057e-14	0.0132993
rjEHulOHigKJ0ZUiHo	IGFBP3	1.17225	0.0679338	17.2558	7.41e-15	0.150551
lTP0kv5R7h7ekJVSOk	IREB2	0.0941459	0.0199791	4.71222	7.40977e-06	0.0304496
Trc1Y6p.17JeRNvoBk	SNORA18	0.392534	0.0382139	10.272	7.40923e-11	0.0572278
Tro0gyHREvl4JL6oO4	LRRC1	0.25215	0.0535094	4.71226	7.40899e-06	0.0736646
fkk3u29x4kZ93l2deE	RPS6KA2	0.759942	0.135223	5.61991	7.40855e-07	0.115409
BheFnLKivz0jZ6SXac	MTOR	0.0867422	0.0223472	3.88157	7.40844e-05	0.0248908
Q7mVIU1KOCKpX7vlVE	SULT1A3	0.167589	0.0187678	8.9296	7.40791e-10	0.0413693
issrn9eNV.mI57q5wQ	KCTD14	2.63213	0.0480375	54.7932	7.4043e-25	0.209268
lo1eNU.13htRdcVTKI	CDK2	0.0959394	0.0203576	4.71271	7.40009e-06	0.0227232
9lroINV63W4m1P_6Bc	ATF4	0.402151	0.0853317	4.71279	7.39853e-06	0.0651971
Q6NBB5x3agh13HRJ4I	REEP5	0.26418	0.0257158	10.2731	7.39632e-11	0.0353689
ilfXdUwjoQC797NHu0	ZNF550	0.208223	0.0441777	4.7133	7.38848e-06	0.0498476
fMt4t9d3hC8qTofhUk	ZNF211	0.119352	0.0180339	6.61819	7.38826e-08	0.0362089
olCbXUp.hbtYDniPqA	STT3A	0.174096	0.0369368	4.71333	7.38795e-06	0.0305652
NiJ34UuDRSWMYG35QQ	GPX7	2.68935	0.0206059	130.514	7.3875e-33	0.136075
QUk.7eoIiHFU38UVXI	MAP3K13	0.175126	0.0451053	3.8826	7.38649e-05	0.0591668
fUleogerJK6eH38JF8	ZHX2	0.259356	0.0220525	11.7608	7.38306e-12	0.0523589
cUBHdXFT15Sd5df9B0	BTG2	0.224729	0.0476761	4.71366	7.38156e-06	0.0357641
xnH8l_U9d_f9JLLelQ	NPHP3	0.312993	0.0350432	8.93165	7.3806e-10	0.0588421
WSXAKYaaPhILOPoiVE	CDC42SE2	0.198274	0.022199	8.93167	7.3803e-10	0.0379756
cenjghL3z_jikk3kXk	CHMP5	0.115758	0.0129595	8.93224	7.37273e-10	0.0210473
oVE0nUK0q48J7Suqws	RBM33	0.12516	0.0322304	3.88329	7.37165e-05	0.0519387
Ql1H6oV5du2383lzx0	SPOCK2	0.699696	0.068096	10.2751	7.37139e-11	0.0996791
fnng6tJM3e.k6.korY	HADH	0.193182	0.0291848	6.61926	7.3708e-08	0.0279937
Trg5RNfpqvOhd_TtMk	PHKB	0.198936	0.0115253	17.2608	7.37009e-15	0.0329029
3XURH31AKCRW_LX.io	NSF	0.176878	0.0131905	13.4094	7.36965e-13	0.0360017
KX4InVaVe0S0tt0.tQ	CAB39L	0.282561	0.0163698	17.2611	7.36774e-15	0.0577435
oedyAsyOlAoW.7Pn14	PRKAR1A	10.9859	0.0756271	145.263	7.36497e-34	0.189921
ZpX0eX_ddU7zlSb_Oo	FKBP1A	0.748148	0.0302073	24.7671	7.36322e-18	0.0711931
ce6qKdK7eiqv7l4wbA	ARSA	0.419923	0.0470074	8.93313	7.36085e-10	0.0638726
NGgYGkd8Ur8WklDVLU	NET1	0.15515	0.0329075	4.71474	7.36039e-06	0.0518062
BZVzUkoJJSONBhlf.U	LINC01278	0.0998398	0.0257065	3.88384	7.36009e-05	0.0345664
Nnunn0fI5LiETL671g	ERRFI1	0.627459	0.0610588	10.2763	7.35754e-11	0.100277
EVK3TX0oP_S9DiCKiE	UGDH	0.147532	0.0262379	5.62287	7.35563e-07	0.0299897
Ne795C5TX7Eu8IqwTo	ZEB2	0.30444	0.0645684	4.715	7.35519e-06	0.0847144
x3XVcjlOfX.t7xr5Ts	PDHB	0.0445081	0.00943963	4.71502	7.35479e-06	0.0131072
6oOKEK4x3ie6HgekhE	RCN1	0.293268	0.0118402	24.7688	7.35379e-18	0.0321667
0P4XS5XhxB6A5QAdi0	SMG1P2	0.545184	0.0463448	11.7636	7.35284e-12	0.0631318
co1ApG.xhIIJfCEVuk	CHEK2	0.0987184	0.0127878	7.71975	7.35082e-09	0.0303823
0D5HTuh6hbmJ5bury0	GPER1	1.03778	0.0531923	19.51	7.35058e-16	0.0731906
cnpo3LhSMzIKHklHj0	F13A1	5.54501	0.0812167	68.2743	7.35008e-27	0.217919
6rtQQSd506d0CBSaF4	POGZ	0.100752	0.0259379	3.88436	7.34887e-05	0.0441383
B1eVUDTSvXavwiC63A	ZNF106	0.0674074	0.00873144	7.72008	7.34593e-09	0.0192631
HnsnX6pArHDV.SRVR0	SF3B4	0.130914	0.0197727	6.62097	7.34312e-08	0.0242818
H10pNT1DQgOOud5NLo	HTATIP2	0.171001	0.00990459	17.2648	7.33821e-15	0.0280194
lSXh15eMnXu1U56114	R3HDM4	0.139211	0.0135444	10.2782	7.33537e-11	0.0258886
Bot.TfekkgNTglalSg	ZNF143	0.0723465	0.0153401	4.71616	7.33257e-06	0.0232978
rih5t.9HhXOP0e4sq4	PROSER2	0.559344	0.062596	8.93578	7.32576e-10	0.100737
oUm.Se6n3FFHCWdFyI	TARSL2	0.143026	0.0368101	3.88552	7.32426e-05	0.0510672
lndF69.zqh.2._pB1I	LDB2	0.408705	0.0457372	8.93596	7.32347e-10	0.0905771
Ko6INenlO6_OUlXUiA	CMPK2	1.14349	0.0519598	22.0072	7.32337e-17	0.122049
39eohTVUX91pd4h.i0	CLUHP3	0.475397	0.0462484	10.2792	7.32276e-11	0.0760972
uoCUnVfddwc_gZSAtI	DCP1A	0.130411	0.0145933	8.93636	7.31818e-10	0.0330025
uhUB_6CzTu8L3e3e.c	CRY1	2.27349	0.0414683	54.8248	7.31576e-25	0.14415
NeBlBTXhWUud_t14uw	C17orf62	0.119545	0.0180508	6.62274	7.31461e-08	0.0276807
uo5XRPrn910105Vf5Q	NLRX1	0.096	0.0170656	5.62535	7.31148e-07	0.0266711
ZvGex87PV7F4Efvnl0	FAM117B	0.686354	0.0219592	31.256	7.31015e-20	0.0579999
6iEdgtIKeqSNH0JCVU	TRIM27	0.100623	0.0258922	3.88623	7.30931e-05	0.0367763
fiOilAZliKCulCpVOA	SCYL1	0.0909061	0.0137255	6.62317	7.30772e-08	0.0259126
uFReUV6gXR73d.SXIU	TMED9	0.255624	0.0454396	5.62558	7.30749e-07	0.0327015
QemBfoioOePt_FAVEk	RFTN1	0.114521	0.00853618	13.416	7.30593e-13	0.0173502
0XoTjlwtfQv.lknV60	GPR63	0.298527	0.0334016	8.9375	7.30311e-10	0.0587103
oiVKryIQl_kEyQjXp0	SLFN13	0.581739	0.0494328	11.7683	7.30275e-12	0.087041
QLsXPxICPAeUXmpE9U	FMNL2	1.09025	0.0495334	22.0105	7.30223e-17	0.122055
Nic3g59cAJitXUBb7Q	IL12A	0.394238	0.0510463	7.72315	7.30103e-09	0.0632388
cAtHiggDCr0rErklrk	RGPD2	0.647452	0.0724407	8.93768	7.30068e-10	0.121381
QhTXPwen0l1UX30lF0	SELL	3.22968	0.130344	24.7781	7.29971e-18	0.118854
TJyhF7rN.D7N19IL_c	DSTN	0.200654	0.0516258	3.88671	7.29932e-05	0.0350636
9CuQfX2ttWDWr01hFI	RPL12	0.0540512	0.00816027	6.6237	7.29922e-08	0.0115853
6t9QHAl5CZRD3C5ZfU	YTHDC2	0.0966501	0.0204859	4.71789	7.29911e-06	0.0369349
xEe5qK4QSJAkmSq0qI	AEN	0.217253	0.0460472	4.71805	7.2959e-06	0.0441742
fpe7eXX6h7ourldLAk	C21orf2	0.153731	0.0232081	6.624	7.29441e-08	0.0384695
3J6InEF0qRLqAo4kpU	ERICH5	0.935314	0.0541568	17.2705	7.29309e-15	0.116504
BhV3kDu0t1AiLN1VQM	GLRX5	0.0486427	0.0125141	3.88702	7.2927e-05	0.0134534
xRIDn5JcKSr.SFurVI	ZSCAN18	1.09946	0.0563289	19.5186	7.28964e-16	0.0898173
fIAk8VP_aUL1YYinoU	DENND1A	0.311956	0.0470918	6.62441	7.28774e-08	0.0451636
6u6A.5eC11FwAXjlPo	PYHIN1	2.84823	0.11494	24.7803	7.28732e-18	0.223146
rkiktz5Chff55S80yk	EIF4G2	0.0475439	0.01223	3.88748	7.28305e-05	0.0134236
EDUn7DWVAJpJQ2iZig	PLEKHA4	0.60132	0.0510883	11.7702	7.28206e-12	0.0934745
Nl4iJ4IpAnApQMVCXI	ENSA	0.223674	0.0146713	15.2457	7.28131e-14	0.0321689
HJ3SL97jj__JfnoQus	PER2	0.125165	0.0222432	5.62709	7.28081e-07	0.0290168
0KSAfVflH1AQF2lVNU	LCP2	0.121384	0.0312223	3.88774	7.27744e-05	0.0533364
cmUr7Q6XTnqEpSj0bA	WDR90	0.231435	0.029959	7.72506	7.27327e-09	0.0478705
BqC3iYt1wMd6n8n3Uk	ZC3HAV1	0.141791	0.0364693	3.88797	7.27281e-05	0.0420142
6epeZ6CTNW4Au8uXys	IFNLR1	0.888488	0.035851	24.7828	7.27256e-18	0.0817146
Z1dBNIEOdC39CUbeJI	SLC12A6	0.507318	0.0182131	27.8545	7.27255e-19	0.0681266
W0X27t9Lt0_01efe.o	RBM22	0.0229527	0.00486362	4.71926	7.2725e-06	0.00981098
oLp5.f_uFdSq6DaLu0	ZDHHC14	3.41749	0.0870686	39.2506	7.26988e-22	0.159419
fEe0fhQx4V38XZUZoQ	RAC1	0.0872764	0.00741429	11.7714	7.26958e-12	0.0175735
ognEUXgHSS0XTfJeCg	SGOL1	0.171551	0.0258916	6.62573	7.26664e-08	0.0379629
W5VJUF3qBKSdc3kB7s	SLC2A6	0.328675	0.0190272	17.2739	7.2665e-15	0.0393662
Qkun0egA67pyT9X_LQ	HOPX	1.65455	0.108509	15.2481	7.26024e-14	0.179264
BUX_PpYB0uPpEIsr5I	OAS2	0.968574	0.0390782	24.7855	7.25703e-18	0.0722649
3VKpUgXFYzoj6gYAoY	SDHAF4	0.13347	0.0343224	3.88872	7.25701e-05	0.0394527
fUp2H0qtLvXtUBVESA	ADHFE1	0.195899	0.0295634	6.62641	7.25575e-08	0.0568232
odcKH9X0U.9yrMuUeE	DMC1	0.322218	0.0313289	10.285	7.25382e-11	0.0680827
EqOhegEJF1UBE0UdXI	CYFIP2	0.0667339	0.00566845	11.7729	7.25365e-12	0.0144512
Zh95B7LVJKB7ghSeV4	PRPF38A	0.0661966	0.0117607	5.62865	7.25339e-07	0.0229802
lekrQ59WhGjR.7ePUk	MCM7	0.0846153	0.0150326	5.6288	7.25064e-07	0.0166647
oX1enTfpfqi_X8p_LU	CCBL1	0.187199	0.0396573	4.72041	7.25048e-06	0.045283
Q8nLuus5F7LVJx0Ip4	LRRC37BP1	0.779966	0.138566	5.62885	7.24979e-07	0.0626819
TPhZPdbnp.H_Sgnfok	RSC1A1	0.18054	0.027244	6.62679	7.2497e-08	0.0493135
H5OvxXeLzv33LiTl54	SPCS3	0.245239	0.0238434	10.2854	7.24956e-11	0.0421973
Kz0go7VugDuleKOW3U	CRELD2	0.743604	0.0631594	11.7734	7.24755e-12	0.0519904
K65bk0UDgL_z8GKK58	FYTTD1	0.607459	0.0398343	15.2497	7.24683e-14	0.0536408
iXi8U0ucO9d.6sy91I	ZNF529	0.182794	0.0275833	6.62698	7.24665e-08	0.0400725
En_ZM0p8oe6inwvkjk	PIGY	0.0660737	0.00642382	10.2857	7.24532e-11	0.0153781
Ev0skz636T9_ke6954	UHMK1	0.0435249	0.00656769	6.62712	7.24446e-08	0.0127454
0okqkpgXf3_SFgS4Ak	ARHGAP17	0.266749	0.0298311	8.94198	7.24429e-10	0.0464832
HXxXftQktCIJfp1e4I	CHI3L2	10.3714	0.0641213	161.747	7.24115e-35	0.185882
xuPF55OALk6qFe5N7k	NRIP1	3.03269	0.0320478	94.6305	7.23831e-30	0.154845
fwd6e_5MoXELqeq_us	STAG3L3	0.441271	0.113448	3.88964	7.23761e-05	0.0638566
HKUvV1KJDhLfz2ifwo	CRYZL1	0.233145	0.0599361	3.88989	7.23243e-05	0.0550868
o.qCfjpSN13lxVJQio	ZG16B	0.547536	0.0612234	8.94324	7.22783e-10	0.0979546
0tMly5PHRu3uiOeuwE	B3GALNT1	1.52541	0.0278071	54.857	7.22677e-25	0.117235
xoQoh1bJOFXujuUuEA	CAPRIN2	0.137093	0.0352408	3.89018	7.2265e-05	0.048403
f0O9LnSs7LCx7LXuqk	KBTBD8	0.55681	0.0252828	22.0233	7.22073e-17	0.0561239
EHVCiHwg6SOi6UO_JE	NT5C3A	0.247565	0.0210225	11.7762	7.21847e-12	0.030139
QZiV67oe63s4Nu7B7o	DGKQ	0.27691	0.0181542	15.2532	7.21591e-14	0.0470232
HpZqJZGaYzoIoqQgqQ	CCM2	0.162425	0.0245024	6.62896	7.21517e-08	0.0446974
u6HuURFS41NSAQoeSU	DYNLL1	0.0922516	0.00896655	10.2884	7.2137e-11	0.0161257
uqUR_J4tFIVz59BLn4	GGA3	0.0828079	0.0212829	3.89081	7.21335e-05	0.0330237
WJJIh4quSLuJ6gK.uk	LPAR2	0.375603	0.0151488	24.7942	7.20748e-18	0.0501303
ZSVvWSocin9p._oSQc	ISG20	0.536365	0.0122087	43.933	7.20748e-23	0.0354747
N10rh6ofoFcoXgQUIc	GMFG	0.220386	0.0112843	19.5303	7.20688e-16	0.0282573
iyiJe56uUI6ISacX5w	SKIV2L	0.0794323	0.0168191	4.72273	7.20585e-06	0.022254
rJ9G667ku4pJ1_n9es	SETD3	0.0435419	0.00921911	4.72301	7.20062e-06	0.0143648
uk7WTU553pd3ioPr10	TTC39C	0.954844	0.0243151	39.2697	7.19804e-22	0.0744691
9kJvkoOp_klOJfPotM	PLA2G16	1.79467	0.0292983	61.2552	7.19201e-26	0.095449
T1EHlCo4BLog103Ugk	SCAI	0.0936699	0.0240682	3.89186	7.19156e-05	0.0456189
EWeVNwX2wIXt179SWU	GNG7	0.818417	0.0330047	24.797	7.19148e-18	0.0793434
ZiEgj4Jf5SU9.V._fU	DLEU1	0.218545	0.0212373	10.2906	7.18759e-11	0.0380531
Erh4pNPIKVIY.Uc9Ek	GNG2	0.365883	0.0166094	22.0287	7.18626e-17	0.0487347
ln4VehP5Hh.NSFAieU	RAB34	1.46336	0.0297904	49.1221	7.18008e-24	0.124314
Z.dGjoPctJ5KaglKas	RER1	0.103818	0.0184302	5.63304	7.17668e-07	0.0314355
rVX_Dit9Tv4qAt_Rz4	G3BP2	0.0623214	0.01601	3.89265	7.17511e-05	0.0213846
r6P_SKuIH3e5edIplc	GMEB2	0.0528099	0.0111781	4.7244	7.17406e-06	0.0190788
fLW.IiQFM_5d9N_FSk	ASXL2	0.134993	0.0285733	4.72444	7.17335e-06	0.0328313
HN7LfolkSr66xXYkRQ	SCARNA13	1.23917	0.0499658	24.8003	7.17257e-18	0.123379
36U54eVFuSkIBN7Un4	SCNM1	0.0906445	0.0232845	3.89291	7.1697e-05	0.0273061
T1Rek_Tbqigfay87hE	DYNLL1	0.11379	0.0171579	6.63192	7.16842e-08	0.0206538
QeHnXQCcGvkXULp6t4	GFI1	1.27863	0.0364549	35.0743	7.16538e-21	0.0986396
9qIANVn5wOMcBb7_p0	FNIP2	1.52423	0.0487167	31.2877	7.16302e-20	0.129144
uSf_dJ.Ouq7Hv83qa4	SLC9A2	0.705925	0.0599168	11.7818	7.15927e-12	0.114138
Wc8GcY5eBcULedeVQI	HIST1H2BD	0.476569	0.0845865	5.6341	7.15824e-07	0.0535065
33_7VUeyKGuJZJ5NBc	CDCA4	0.213376	0.0158863	13.4315	7.15731e-13	0.0345324
WSemIeyVXVHVEdHfkg	CENPM	0.227987	0.0294817	7.73315	7.15695e-09	0.0320418
x_6A1qKDuld5U_6_bU	MRPS5	0.0710505	0.0126105	5.63422	7.1561e-07	0.0210134
NV.Pl0.fuGX76oqA3s	RNF149	0.411859	0.0269888	15.2603	7.15481e-14	0.0411606
BpCIi6vQCHXqdF7yZ4	ELK1	0.233342	0.0134971	17.2883	7.15461e-15	0.0336228
TJ51wIIpIpTgwXglVE	C2orf49	0.300922	0.0174056	17.2888	7.15053e-15	0.0425414
9oNerotQRDRGiFFN4k	C15orf27	0.628427	0.0702214	8.94924	7.1502e-10	0.109499
TrU1SkesflV_97NVf4	PBXIP1	0.175536	0.0371427	4.72598	7.14411e-06	0.0602331
ZF65k4uq38Iv_undU4	TSC22D2	0.127877	0.0270577	4.7261	7.14177e-06	0.0373591
KV7kDSLO4uggquLXB4	FCRL3	0.641355	0.0477438	13.4333	7.14024e-13	0.102243
0leJ4Hq_7wRPrInOPU	EPB41L5	0.544446	0.0405296	13.4333	7.1398e-13	0.0943865
9gjnHf10XnvtOXFOpY	ALDH6A1	0.184616	0.0206274	8.95007	7.1395e-10	0.0347582
lsSNUnzpfhUltdEjlo	SPSB1	0.521536	0.0442591	11.7837	7.13899e-12	0.0970151
od9VeHVU_7wgVJBUok	CD1C	0.76096	0.0983846	7.73454	7.13716e-09	0.116157
iFKdoH18iU4J6iCCX0	THYN1	0.122014	0.0136324	8.95032	7.13625e-10	0.0266993
Qu7V3q1dQB3rS9CjlU	CCL25	1.75507	0.0319741	54.8904	7.13536e-25	0.137673
uqc7KSvDXUfdO6_BS4	TERF2	0.0869432	0.022323	3.89478	7.13106e-05	0.0276048
oGJDIOzrRerulLlZ7k	JADE2	0.323697	0.0274679	11.7845	7.13031e-12	0.0462271
xk1dd53U0wec8lA9KU	FMO4	0.37549	0.0217148	17.2919	7.12699e-15	0.064711
unEgEK22npomn6ACF8	SBDSP1	0.0813147	0.0172012	4.72728	7.11947e-06	0.0297118
Q0s0Qd54iR5Je674p0	SUPT3H	0.533248	0.0452445	11.7859	7.11569e-12	0.095439
BlcG0.J__3jl1LKEXU	LMO3	3.45168	0.0293876	117.454	7.11502e-32	0.175035
BTvcUX6UfSQvT14qdU	GBA	0.171124	0.025789	6.63553	7.11171e-08	0.0433191
xKhVKRCJ5RV3la.6AA	P2RY11	0.611353	0.0277371	22.041	7.10951e-17	0.0539889
9Jf90CV.S8QUVRzoNI	ANAPC13	0.122681	0.0104085	11.7865	7.10926e-12	0.0205934
N66ifui2jRsXuSAWXc	C7orf50	0.0800147	0.00893769	8.9525	7.10831e-10	0.0157398
rud35wIWSIUxe_0CKs	ZNF627	0.293953	0.028546	10.2975	7.10747e-11	0.0419089
ZlKEldUlODXx0nF2r4	P2RX1	0.65051	0.0376138	17.2945	7.1068e-15	0.0959283
NG_Lp56Od7GoK14aOI	PYCARD	0.563762	0.0180114	31.3002	7.10557e-20	0.0490478
iQlU4nn.OeAOtP1e9E	DCUN1D1	0.111376	0.0285868	3.89605	7.10491e-05	0.0343482
BgSfotO.E3L3Hha9U0	LOC100240735	0.235999	0.0229172	10.2979	7.10321e-11	0.0559029
07aNe4sp6l1XqSr3UI	CHKA	0.125208	0.0188675	6.63617	7.10174e-08	0.0384087
T4Ue8_8f4f9IkRX13o	CD44	0.770676	0.0196123	39.2956	7.10149e-22	0.0439829
TkrTkRL.jAqSwQs_qU	RHOB	0.367369	0.0651635	5.63765	7.09708e-07	0.073273
x3lXV5Wb9Kl2tTIgRQ	MLST8	0.0696341	0.017871	3.89649	7.09606e-05	0.0264724
uqdk1AIMwR1CTgIukk	FAM26F	0.580553	0.0648411	8.95346	7.09593e-10	0.0874545
oIylIm6GK6IJ00JlGI	SPTBN1	0.272985	0.041133	6.63664	7.09438e-08	0.0585728
uWodEa5.ogivvRBKzU	MRPS18C	0.0839657	0.0148933	5.63782	7.09416e-07	0.0182321
3iVJ0fJSdH_Kk1zARU	SNAP47	0.0698421	0.0147699	4.72869	7.09289e-06	0.0255771
HaFSBPdSy5PS9BEkLk	SEPHS1	0.276428	0.0490303	5.6379	7.09284e-07	0.0527424
6ZmPadI6XF0RH2KKOw	C1orf228	1.20996	0.0792488	15.2679	7.09023e-14	0.116448
EheiMqyXn_XuuoJ0sE	BIRC2	0.130244	0.0275423	4.72885	7.08991e-06	0.034145
N20dE5GEtfvVUoKl64	MPPE1	0.406049	0.0184193	22.0447	7.08638e-17	0.0461051
352KZNKVv.xS.M0a30	RHBDF2	0.297862	0.0195082	15.2685	7.08488e-14	0.0365995
3iMk6Ve0GfXu9RXuHo	SGCE	0.482017	0.013735	35.094	7.08425e-21	0.0438973
TnebutbOgJesleYvCw	STAU1	0.0353014	0.00531861	6.63734	7.0835e-08	0.0113496
3l_kqRDhftgNRe0oZc	CST3	1.07186	0.0342386	31.3055	7.08173e-20	0.0674806
NIuXXu9Suf7kzP93jU	C1orf52	0.0661958	0.013997	4.7293	7.08149e-06	0.0210116
HYkdPedXO8.QqXUKkk	ZDHHC16	0.160804	0.0179576	8.95466	7.08061e-10	0.0370124
KUV_oun66J6oQr.vxw	SPTLC2	0.188854	0.0284522	6.63761	7.07922e-08	0.054023
0jOJ3JZUJyQ6QV96tU	UBA52	0.38396	0.028569	13.4397	7.07918e-13	0.05472
QdI4Ir2EqHQJc9S_lw	GLRX3	0.0518557	0.0091962	5.63882	7.07695e-07	0.0151297
xz1S1tKD.sgqfTuesU	PNPO	0.192411	0.0163198	11.79	7.07338e-12	0.0268533
0VYLNK7XdM9eVXtLoE	SPG21	0.0827862	0.0175032	4.72978	7.07236e-06	0.0247011
oIvgZd1ylHEB4VdJKk	PLXNB1	0.821814	0.0372755	22.047	7.07207e-17	0.107091
l.eugFC9FenqJN3jik	RAD51D	0.108488	0.0278316	3.898	7.06518e-05	0.0411718
unWn11HnghXnsieCeA	ESPNL	1.98316	0.0323473	61.3083	7.06245e-26	0.127368
frS7Up6BAmUuB3h7OI	ABCB1	1.11023	0.0727011	15.2712	7.06233e-14	0.129454
BlKQle71_oev_e6_jE	PSMD9	0.173474	0.0445016	3.89815	7.06214e-05	0.0587043
9x7QFJOvD7iTXeSTlU	DGKE	0.14505	0.0257193	5.63973	7.06137e-07	0.0452376
Kv6jfd1RUR83VUqUdQ	CES4A	0.474263	0.0402218	11.7912	7.06101e-12	0.0861252
Hvvqsg1IH9Jeeki3t0	PKHD1L1	0.885455	0.0317412	27.8961	7.06073e-19	0.08313
rNM1ieFr6KuEjSCnes	DCAF6	0.0676288	0.00442829	15.272	7.05592e-14	0.0161403
BU6gOUeyttjF3p4KPk	TMPO	0.133021	0.0341214	3.89846	7.05575e-05	0.0355317
lLq5yrfh.N1nkQku74	TEAD2	0.376379	0.0319189	11.7917	7.05532e-12	0.0796669
0e.hddVd584KrJOPe4	PLEKHA2	0.140044	0.0210932	6.63933	7.0525e-08	0.0257145
03kIj3koHq7kRrvslI	EFR3A	0.203437	0.0092261	22.0502	7.05245e-17	0.0271234
lKG415_qH0OeHmfR4U	DNASE1L1	0.114021	0.0292437	3.89899	7.04503e-05	0.0453779
WF.WLknoqN4mSghkgQ	PACSIN2	0.330967	0.0191278	17.3029	7.04232e-15	0.0526424
TUCU6iq7XXSFOVUjj8	BTBD2	0.173508	0.0168402	10.3032	7.0419e-11	0.0246201
Hp4rv_K5Ngu9QnuHxc	RBPJ	0.19904	0.0420674	4.73145	7.04123e-06	0.0399641
ln0vn7fesf3vOp.6ok	TP63	4.5634	0.0432385	105.54	7.03704e-31	0.152961
BYQNrCnz069PlKJIzk	ZNF318	0.393571	0.0333715	11.7936	7.03572e-12	0.0465556
ZuVU025DF0uSQdfj34	RPL22L1	5.04639	0.0478145	105.541	7.03571e-31	0.216199
c6fIAuMUlQgSo3K4lQ	UPF2	0.0613417	0.0157303	3.89958	7.033e-05	0.0214059
9hUoCu4noJHgXF0114	QARS	0.0396858	0.0101765	3.89976	7.0294e-05	0.0118193
0onmoDvgmUoiH.mQYs	POLR2M	0.106492	0.0273071	3.89978	7.02885e-05	0.0417686
0lOwqJTfoJI11JdS0I	CD96	5.81124	0.0683286	85.0484	7.02696e-29	0.242617
0f9f0q.7XVAUi0znnI	ZC3H12C	0.804295	0.0256813	31.3183	7.02367e-20	0.0632242
NqwsZB8f9RQIHtJJ5c	MTHFD2	0.266816	0.0401754	6.64128	7.02244e-08	0.0344011
H1UmTF7133T3dVll78	HUWE1	0.11942	0.0306192	3.90016	7.02133e-05	0.0376267
67fqDv0ecVk1Jh5JFI	LAMP5	6.31057	0.0389584	161.982	7.01706e-35	0.165606
xoT3o8_9ST5EtUcBfs	EXOC1	0.0773088	0.0163348	4.73277	7.01666e-06	0.0268495
lemCiUjtjlPUkuoJ.g	DNAJC12	3.31343	0.105791	31.3205	7.01402e-20	0.237717
KeRf6rTn_yS7dX5hdk	ANKMY1	0.24338	0.031431	7.7433	7.01383e-09	0.0468269
igooh6hKIBZcAuzSrc	PSMD6	0.0672092	0.0142001	4.73301	7.01209e-06	0.0176256
NZYJ6FaKI4BoI5mKO4	TOMM5	0.281984	0.0273614	10.3059	7.01135e-11	0.033851
EdRTqDUN75LdfQk97Y	PTTG1	0.148863	0.0110703	13.4471	7.01022e-13	0.0206852
roa1X1.Td6Xv496SSU	MCTP2	1.14554	0.0971092	11.7964	7.00687e-12	0.13876
6Jehe6mLVPp6nel40c	CECR5	0.161506	0.0341209	4.73335	7.00592e-06	0.0491145
3P_h5RE_sX8vd4KVG8	PAICS	0.0433592	0.0111145	3.90115	7.00118e-05	0.0128432
irXnd2eLE1lEGE5U3E	UBR4	0.197923	0.0297957	6.64267	7.00104e-08	0.0351809
0CeiiuOSiealeKmetA	CORO1B	0.531216	0.0515387	10.3071	6.99738e-11	0.0972054
01YintXoV6ek6AxLqA	NT5C	0.0527092	0.0135105	3.90136	6.99689e-05	0.0163671
cgblN7AkdIKSU1cjvo	RASGRP3	0.269123	0.00766384	35.1159	6.99537e-21	0.0292121
HRPf.670yffdMSuUhE	CCP110	0.163775	0.0182755	8.96143	6.99482e-10	0.02942
il313gyFIZX9Hy9LlI	ATP2B4	1.09216	0.0714772	15.2799	6.98952e-14	0.153026
rpPv4ntU3Ue81f6v.w	TIA1	0.0817443	0.0105544	7.74508	6.98904e-09	0.0202172
iIEIPQC4rLTUr1V1RA	DNAJC24	0.0667272	0.0171014	3.90185	6.98719e-05	0.026928
WpAEZVTeeX.c_V5BtU	RING1	0.0910308	0.00676827	13.4496	6.98695e-13	0.018007
0Z8tVNWr_niXp6InnM	FGFR4	0.859817	0.0496707	17.3103	6.98646e-15	0.126559
9VP14hRSIiqIJeo_Eg	LCK	0.525139	0.0509436	10.3082	6.98465e-11	0.0688246
uo6C3k3ivnS7VrT0.E	ASAP1	0.629643	0.0285404	22.0615	6.98316e-17	0.0574459
0itKL0AUl6UE6YDXt4	AOC4P	0.889378	0.187845	4.73463	6.98218e-06	0.0689277
K8VQgl6r1OXpI6UgIE	MREG	0.174582	0.0447404	3.90212	6.98163e-05	0.0498235
Nlb98V1OfntedEXF54	CAPN11	0.4382	0.0425084	10.3086	6.98106e-11	0.0915423
TJo86PHOIUElLnUJWg	CCL14	0.259116	0.0459059	5.64451	6.98036e-07	0.0723092
BQSpeUADaKvXXTdTdE	NCKAP5	1.8313	0.0333276	54.9484	6.97993e-25	0.154889
Kr544ac67tsTX7qIgU	CPT1A	0.462273	0.0391787	11.7991	6.97943e-12	0.0844045
9udTlEPOu6odIK4UKU	ZNF484	0.0714371	0.0183066	3.90226	6.97875e-05	0.0360395
ZnfAAeVPYool_SKuAk	CFAP69	0.454949	0.0385575	11.7993	6.97769e-12	0.0945742
o5yE66E.iSXhe6oqrc	MCM3AP	0.085171	0.00950265	8.96287	6.97678e-10	0.0210155
KrjfI.jgkSzkrKXDqo	GNPNAT1	0.0903621	0.0160074	5.64503	6.97147e-07	0.029504
ouF0SwE3eX_Xu7veqg	MAP3K7CL	2.19476	0.0167709	130.867	6.9703e-33	0.126114
igG0si0R.uxKjt8uVI	PRPF38B	0.0557112	0.0142749	3.90273	6.96932e-05	0.024255
Hs5.f5fvXvdKuGHlFI	GRSF1	0.180327	0.00921683	19.565	6.96842e-16	0.0277137
6lWX99edJ1RohUS3dc	CCR10	0.814498	0.0369151	22.0641	6.96707e-17	0.0831136
9MLpPJDXUpFXYjhpic	SSBP3	0.0937304	0.0197931	4.7355	6.96597e-06	0.0376143
EC1yOkA26V0ecK5In4	PSMC3IP	0.173868	0.0367156	4.73553	6.96551e-06	0.0475741
BlxxEXKc.rMl7616rE	MCOLN3	0.216272	0.0383095	5.6454	6.96537e-07	0.0549845
KeK0qLnp0SxJO5fDn0	RASSF1	0.124414	0.0262717	4.73567	6.96299e-06	0.0308508
Zle_ESt.XCnkK.Keuk	CCND3	0.462073	0.0147475	31.3324	6.96074e-20	0.0379341
05KVyf6Big_oj1KLSo	ZW10	0.0676232	0.00754367	8.96423	6.95968e-10	0.0183364
3.igy.oX7l17qKeKHk	RABL2B	0.127156	0.0225216	5.64599	6.9554e-07	0.0347412
NwOS_7UvopSrFE7RKY	SPTY2D1	0.665334	0.0435306	15.2843	6.95285e-14	0.0682152
oQkJ1QqOuV73cUJzXo	IL16	0.615193	0.0457277	13.4534	6.95207e-13	0.102043
Wp7sk10uQBUnUg.0Xo	RWDD2A	0.264333	0.067715	3.90361	6.95177e-05	0.0446218
EOempOpeRxPl9KCuCQ	DNAJC4	0.0882313	0.0156263	5.64632	6.94988e-07	0.0267482
fif7nggv.rqfy4e5.k	ELK4	0.113199	0.0289976	3.90372	6.94946e-05	0.0440171
fV6qIhyAESCgkkSohU	HEXDC	0.317439	0.0354084	8.96507	6.94917e-10	0.0543689
6PfJ5qKSeWCXgHeXnc	APH1B	0.238547	0.0121907	19.5679	6.94849e-16	0.0404138
NrQlflSJ3c96CJrUro	NEFH	2.24918	0.0457133	49.2019	6.94259e-24	0.164002
olEtGUeT3NepBI6IX4	C9orf64	0.0779827	0.0138102	5.64675	6.94255e-07	0.0289041
Q1J7q_ku1ISoqVNFgM	PP7080	0.117852	0.0301859	3.90421	6.93962e-05	0.0374404
HtXusgB8d.OXrksw9U	KCTD6	0.116144	0.0129537	8.96609	6.93642e-10	0.0278992
xinjtCRRFUFUm3bi1g	PDGFRL	0.701901	0.0594662	11.8034	6.93569e-12	0.110495
QqQF0qheQ0ghuCkj.Q	MS4A14	0.509461	0.0766414	6.64734	6.92966e-08	0.110209
fkXmSMiEN8Vkr.SNyg	CASP6	0.186452	0.0207927	8.96718	6.92285e-10	0.05071
fIouv7hCaDUDpPYunU	KYNU	0.376522	0.0279803	13.4567	6.92206e-13	0.0357382
60koQJSXRyBXEkSj5E	LRRK2	0.200881	0.0514397	3.90517	6.92047e-05	0.0726064
KLWoEj1H3oEAr3T6pU	MMAA	0.409711	0.0209333	19.5722	6.91978e-16	0.0629804
3tEko.VQVJ1NNEhEiI	RASSF4	0.965577	0.0437458	22.0724	6.91633e-17	0.0982406
9eFK8yO6dWJ95s3kl0	IPO4	0.177617	0.0454784	3.90552	6.9135e-05	0.0433575
Tme.WXfl9oZaP_G53Y	RPS7	0.285724	0.0242025	11.8056	6.91334e-12	0.0356979
3_J5a9mL2KUr1l7bq8	ARRDC2	0.112403	0.0237216	4.73843	6.91215e-06	0.0390545
ElAfU_tKw9KKuqKFpw	IFT81	0.155038	0.0327193	4.73844	6.91207e-06	0.0575671
Kn3clQEmE5wLVffSLQ	DEPTOR	0.837607	0.0622392	13.4579	6.91114e-13	0.125431
od4ToRJShCedIXH1_o	WASH3P	0.367136	0.0211968	17.3204	6.91107e-15	0.0472695
cpUlE5QdO1DHn_Xruo	DCTN2	0.0586526	0.00568619	10.3149	6.9091e-11	0.0145619
iS9.5fvd5eO7OSKSV0	LMO7	0.317273	0.047718	6.64892	6.90564e-08	0.0802522
NqP5df4dRAKwgro6d4	SNRNP27	0.0698357	0.00900965	7.75121	6.90425e-09	0.0190301
9zfCohmRAJp5QFv200	TOX2	1.36119	0.0487398	27.9277	6.90419e-19	0.0889562
xh7XpNgd1d7uw_iiFE	NUP37	0.132615	0.0128556	10.3157	6.90049e-11	0.0216352
HT64TpQ8LNLiXXN6h8	RBM47	0.256239	0.0330566	7.75151	6.90018e-09	0.0367178
iVKmfE0AgaKYksYSQY	GNL2	0.0402439	0.00712348	5.64947	6.89709e-07	0.0126839
lv1.83dCUUnlJRRiUk	CYBB	0.738607	0.0264452	27.9297	6.89424e-19	0.0712782
fnXu8QqIHT_I0t76T4	ZNF217	0.43657	0.0369741	11.8074	6.89424e-12	0.0496633
Hu1Ssk_HVtPouA6NAs	CALD1	0.478478	0.0405231	11.8075	6.89346e-12	0.0994648
r8ldIFhlIH2K6X3TeY	SMTN	0.0965091	0.0247045	3.90653	6.89333e-05	0.0448201
9qiKALo6C7egKkYiLc	NCF2	1.15724	0.0524195	22.0764	6.89222e-17	0.078593
fSqi4B_noSNNdHS9Xo	ZSWIM8	0.23605	0.0304496	7.75216	6.8913e-09	0.0389619
NUWZ_p74U1U081FU_E	MTFP1	0.138306	0.0354027	3.90664	6.89127e-05	0.0452905
oop4pqiNEK0ojYhSXg	CCBE1	0.716829	0.183489	3.90665	6.89102e-05	0.067945
cXXV01fUF.ExNEg0FA	SECISBP2L	0.146879	0.0259958	5.6501	6.88671e-07	0.0342735
rSnv1Q7QvPKsh1KK6g	LDOC1L	1.40653	0.0148286	94.8526	6.88534e-30	0.12822
EXeE6unOcflOH0eKe0	IDH3B	0.0595826	0.00895944	6.65026	6.88531e-08	0.0156092
6uVd7N.4guaDK_fcUU	GID8	0.0784418	0.00760309	10.3171	6.88475e-11	0.0191505
BolUoXOR.P3hVun2ng	TRIP10	0.428845	0.0247543	17.3241	6.88383e-15	0.0602092
oTl3uX2dOe.fWHoOX0	PNKD	1.30107	0.0189971	68.4881	6.88118e-27	0.103793
3nGLUT17_w1_vZWv94	JUND	0.0380569	0.00673521	5.65044	6.88096e-07	0.0111682
BddMriNCKUUvsfSRQ4	ASCL1	7.05943	0.0435417	162.131	6.87971e-35	0.20564
ol6H8XmzkTnSD7ccp4	ARRDC3	0.476487	0.0716448	6.65069	6.87887e-08	0.080807
BnqsooK__SU3HnnsVw	SLC39A1	0.0730441	0.0109829	6.65071	6.87856e-08	0.0195875
N5Nhvdeq7uUJgFSq4M	PNMAL1	3.72395	0.0756515	49.225	6.87517e-24	0.265987
T.1KCViVKF76SL5Srw	SOX18	4.36926	0.0794551	54.9903	6.86995e-25	0.225482
95BSfOKkOqkXAd_OAg	TCEAL8	0.0405161	0.010368	3.90781	6.86801e-05	0.0162194
9r9NfQCqvWIiRbKn.c	PCF11	0.0820429	0.0145175	5.65131	6.86652e-07	0.0270792
HoggJAr.qDmCqXT.p4	NUSAP1	0.113288	0.017032	6.65151	6.86648e-08	0.0235048
ESqKR7eKIcSSuBLcQo	GNL3	0.0474996	0.00714113	6.65155	6.86586e-08	0.014113
6hOi5K6Ee7ge._tLz4	TROVE2	0.0483629	0.0102009	4.74105	6.86446e-06	0.0150629
Wu5Oor8QCEh7Vzn7kk	ORC4	0.118507	0.0249959	4.74105	6.86439e-06	0.0445934
Nt9PX86l_enqn8Egdo	TMEM60	0.0478097	0.00616571	7.75413	6.86434e-09	0.0150327
Hpzvixsp7qCOCOv6K4	S1PR1	0.470524	0.0524436	8.972	6.86301e-10	0.0619
rMDue4oOgDOuSu3604	ZNF644	0.205435	0.0525663	3.9081	6.8622e-05	0.0476366
KiQFSxdISgLap.hRxQ	DUSP16	0.315971	0.0352169	8.97215	6.86118e-10	0.0523377
6Sp1SJx7VCIyCugHlI	PSMG3-AS1	0.138981	0.029313	4.74127	6.86037e-06	0.0541037
WuDuXii3aBogFLVYFA	ADD3	1.12112	0.035755	31.3556	6.85823e-20	0.0861471
WoxKHU0py76oFJWkl8	NIPAL3	0.151765	0.0268515	5.65201	6.85486e-07	0.0430967
lklI6yJkjlRR4CLh.g	CASP1	1.02945	0.0292853	35.1523	6.85015e-21	0.0756456
xUU5cfv5_cXl54VF4U	UBQLNL	0.363836	0.0352546	10.3202	6.84981e-11	0.0771415
iqfROeih.vj1.Egjmc	FAM169A	0.325522	0.0575894	5.65247	6.84734e-07	0.0894772
fW46g4S4grWXuZugR4	HERC2	0.103072	0.0132903	7.75539	6.84711e-09	0.0308997
E6_UohJCQJSShOC_c8	PSAP	0.290545	0.0131563	22.0842	6.84563e-17	0.0281045
oAseZhDNSpNFCWlNaY	HIST1H4K	0.287708	0.050898	5.65265	6.84435e-07	0.0470305
uJeSqJIfrlSeUgJEj8	CLK3	0.233307	0.0350668	6.65321	6.84092e-08	0.0343659
TkSKF7dVpx35fOncu4	CACNB3	0.702339	0.0405273	17.33	6.83998e-15	0.0923911
cm2tusjKa05MYP9J34	USMG5	2.98349	0.0253545	117.671	6.83841e-32	0.13263
KevBfguHvsU6_5E59I	RDX	0.108634	0.0163274	6.65347	6.83706e-08	0.0243727
TuyPlWlXd4leyTe4yc	PRKRIP1	0.261945	0.0337725	7.75617	6.83651e-09	0.0470923
3Una1dSkCiAah8fRKE	LANCL2	0.184017	0.027657	6.65353	6.83609e-08	0.0508462
36udlR_1Rzerk434kI	CD83	0.843568	0.0191518	44.0464	6.83501e-23	0.0587615
WUBFC7yeXwr81qk_uk	C18orf8	0.119199	0.0179147	6.65373	6.83312e-08	0.0247272
lvk.TqXqr9ckijPolU	VAV3	0.235053	0.0415775	5.65337	6.83238e-07	0.0720349
3hZb3QoasCrdelAPVQ	TTI2	0.0412356	0.00729389	5.65344	6.83125e-07	0.0160077
EdGElS4qU4brRMOE7o	WDR33	0.158601	0.0334398	4.74288	6.83113e-06	0.0387493
TrlEv8BSCukd7p1_yw	GORASP2	0.071159	0.0182006	3.9097	6.83076e-05	0.0198398
oO3ZwwVSc_3vu9J4jk	GPR180	0.118083	0.0177465	6.6539	6.83054e-08	0.0295171
6Ts3_oXtJbpLdX1yU4	SNORA24	0.730757	0.0942105	7.75665	6.83003e-09	0.0863016
uaVBVeBDVIaXxx4u94	SUGP1	0.0494073	0.0126357	3.91013	6.82219e-05	0.0190942
NIEjp7gDxFTkSBCUSg	CDK5R1	1.99003	0.0800355	24.8643	6.81951e-18	0.139785
BX5UdciEnudH.Xn_5c	KIF2A	0.0420003	0.010741	3.91028	6.81931e-05	0.0162779
HkxTQYkScIEi4iKVOk	LRRC16A	1.45528	0.0520763	27.9452	6.81885e-19	0.126659
0ICkSh2cLvZxmqcWjY	DYNLRB1	0.0573879	0.0120979	4.74364	6.81744e-06	0.0195119
0iS9nXV4wi_1QKtnwo	S100A10	2.29278	0.0373345	61.4118	6.81693e-26	0.144915
reQlSyH_1SlPzuN9FU	CLEC2D	1.29472	0.0136434	94.8973	6.8164e-30	0.107797
uxGdFpxSNhNFGiBSxY	MAD1L1	0.461209	0.0513826	8.97599	6.81393e-10	0.06823
imS5fkxUBSuom.74k4	CDC25B	0.259478	0.028908	8.976	6.8139e-10	0.0374768
x7V.X3NFcT1JN8X0zk	BCL11A	6.80525	0.0466787	145.789	6.81308e-34	0.183048
NeS4lCNmk_R9JepjIk	FKTN	0.204867	0.0431847	4.74397	6.81158e-06	0.0260572
xxT4gidRSSF45c4ERE	BCAP29	0.153126	0.0197373	7.75819	6.80911e-09	0.0339818
QlQR6ud31HEiDXggCo	SUV420H1	0.182684	0.0203508	8.97674	6.80481e-10	0.0436759
9XwCj0QAf_UR_uXKV4	DACT1	1.61845	0.0328621	49.2499	6.80366e-24	0.131486
lW4AaJ4EMp71TslV6U	TNF	0.50637	0.0652654	7.75864	6.80308e-09	0.0467252
HiiPQRRISeSh2M1On0	DESI2	0.255647	0.0216343	11.8167	6.80102e-12	0.0380754
WneUfnJ7iHuhAUdJd4	ADGRG5	2.1304	0.0310888	68.5263	6.80085e-27	0.0975975
6DgkeiKrdeAFeSAejg	CLIC4	0.334458	0.0134493	24.8681	6.79937e-18	0.050591
rR_heopIr9LiVI2YR4	PLA2G2D	0.393591	0.0695931	5.65561	6.79566e-07	0.0716217
xf6KqUpABtVglJL7Ig	MARS	0.08567	0.0151467	5.656	6.78913e-07	0.0212649
HUgn802vPCifZCnHgk	MZT1	0.195961	0.0412946	4.74543	6.78517e-06	0.0463892
EK2RR5HUt6sEiYh.cg	CDAN1	0.293896	0.0619317	4.74548	6.7843e-06	0.0324173
0u9eiDuPahktFxFiRk	HIST2H4B	0.141336	0.0297826	4.74559	6.78233e-06	0.0417442
TZmQSU6f8KMWgARW6I	RPS20	0.0157608	0.00278632	5.65648	6.78139e-07	0.00627082
oWPUzpO1BPSrtzJWPo	FBXO3	0.0982197	0.0126566	7.76035	6.77988e-09	0.0309291
ieY4sKsKmToOqcK6i4	TMEM44	0.349093	0.0259117	13.4724	6.77958e-13	0.0568028
BlpDqSl5Ax6RIk8NMQ	HMGCS1	0.387251	0.0197644	19.5933	6.7793e-16	0.0368814
ZWuWSDjpVDVutSNPzI	FNTA	0.101177	0.0178864	5.65667	6.77824e-07	0.0265763
E6.xf9ai3UnpXT_7Wg	UGP2	0.18563	0.0474452	3.91252	6.77546e-05	0.0543481
rVUch7idfipSh83e9k	ATPAF1	0.072753	0.0153291	4.74607	6.77383e-06	0.0254438
xoB14Cd3p6C14x4N1I	PCM1	0.129185	0.00958843	13.473	6.77366e-13	0.0225664
BlOeInqf13uFNWl7BM	GAS6	1.24491	0.0717967	17.3394	6.77116e-15	0.15102
TlKmqmq5P1NfsBX0yw	JDP2	0.286713	0.0430613	6.65825	6.76565e-08	0.0629785
KShxEs6ueXeNNt5d.k	SLC44A1	1.06637	0.0241978	44.069	6.76326e-23	0.0886734
Zr9OhHviQ7EuzrufF4	CAMSAP2	0.425571	0.024542	17.3405	6.76288e-15	0.0562487
QfSUjhOIgzVIFd3UK4	RUNX1	0.574851	0.0331501	17.3408	6.76072e-15	0.0889627
Kq05J6uOMgi6n8HpKU	SLC35A5	0.610317	0.0311443	19.5964	6.75895e-16	0.0546624
WlysSDwyV8kGHnnruw	IRF2BPL	0.768847	0.0245017	31.3793	6.75516e-20	0.0583096
iUeu3DGc__Wiur3uG4	ALPK2	1.95928	0.0318899	61.4389	6.75402e-26	0.1275
fkii3e6FOD5Ht1ddP0	MOSPD2	0.100732	0.025738	3.91373	6.75181e-05	0.0365387
32q0vCXSz3yf__P_kc	SENP7	0.128076	0.019233	6.65919	6.75177e-08	0.0318397
33obrCQopAnZlAmA1Y	HIST1H2AC	1.05947	0.0692061	15.3089	6.75141e-14	0.0741917
xna_3uqS3Ci9eQN3jk	TRIM69	0.592079	0.0439368	13.4757	6.74999e-13	0.0790181
xUp5ItVCj8MKeuv9Og	SLC25A26	0.319015	0.0162776	19.5984	6.74563e-16	0.0560497
rqEqc_MK1X675ffk3U	GLMP	0.115084	0.0172808	6.65965	6.74491e-08	0.0257371
3e90qFN2nl17FSHcF4	TSEN54	0.162888	0.0244584	6.65981	6.74253e-08	0.0469274
6Vye6yguldItCiko4M	LOC154761	0.673239	0.11897	5.65889	6.74201e-07	0.0972898
rkkInovXorkooMTQI4	PSMC4	0.183666	0.0204484	8.98192	6.74173e-10	0.0364382
ZSi56ddu.rirouKVeQ	TAF1C	0.411931	0.039877	10.33	6.7416e-11	0.0725729
BQUukrdQlQoQVHgYKg	SYNGR1	1.32944	0.0534351	24.8796	6.73819e-18	0.152762
ZFcKnq6e3QoRPgxvuE	ABCA3	1.13627	0.0456706	24.8797	6.73739e-18	0.12213
r3ovwUjXVRVZ1dMtxU	SIT1	1.36017	0.0386616	35.1813	6.73686e-21	0.104234
ldedH5OLvhZxelPu6U	GPR15	0.476205	0.0530154	8.98237	6.73622e-10	0.0755364
BRIrveF5B_HqCVerBE	CPEB3	0.794309	0.0671793	11.8237	6.73165e-12	0.0983805
HIC4mKLSAdJR6_X6yk	RAB28	0.104388	0.0184443	5.65967	6.72939e-07	0.0332361
Trqpb5K7Hqe0qN.3MU	SLC27A3	0.225894	0.0251467	8.98307	6.72781e-10	0.03901
919WLjFTgeUsinnNvU	PSME3	0.178787	0.0456669	3.91502	6.7268e-05	0.0377575
6HlFLVSeSF9NV9N1Rw	NEDD4	0.192625	0.0289172	6.66126	6.72109e-08	0.0571734
Nql4j95H8BCddcrijk	IFIT5	0.324386	0.0187006	17.3463	6.72095e-15	0.0609382
KOMbAZ1.qBU9ipJaag	CAMKK2	0.75928	0.0563291	13.4794	6.71733e-13	0.0991892
WrRKgtEgSwxnJKpOqQ	FAM86JP	0.216014	0.0182672	11.8252	6.71674e-12	0.0526526
3tC_VJ_i_3tGRO7Xus	PITHD1	0.0499639	0.0105202	4.74931	6.71589e-06	0.0155476
ZUSvL0tAkpBVfupHhU	LAPTM5	0.159608	0.0118408	13.4795	6.71589e-13	0.0220009
QSTToCVwIJXdJEtSo0	FOCAD	0.107415	0.0161243	6.66173	6.71426e-08	0.0289418
xL515VdXgc.7nuzNHk	SSBP2	0.190894	0.0286538	6.66207	6.70922e-08	0.0316305
uXRKlUK7WLu_reBmAw	CLCN7	0.113478	0.010982	10.333	6.70867e-11	0.0206575
9uToKnR5MhFUwVSn8o	ZNF433	0.26027	0.0220078	11.8263	6.70656e-12	0.0534025
BD6Qjs.8f1COW7uUIM	MBLAC2	0.211543	0.0445357	4.74996	6.70447e-06	0.0591981
xqcezTVzOfpLz_Q2UU	TMEM251	0.135186	0.0174073	7.76605	6.70354e-09	0.0310481
QInWgH5XgojqB1I5Ec	RPL31P57	1.41574	0.105014	13.4814	6.69909e-13	0.151255
rr5wo6ngnqt6F9DQJc	PTTG1	0.176824	0.0227671	7.76666	6.6954e-09	0.026077
6SoXiLCROEm3n5vu3s	ZDHHC8	0.0700221	0.0105091	6.66302	6.69534e-08	0.0173651
ipeYnqAoSOKoXbl9_c	SLC8B1	0.106963	0.0225161	4.75053	6.69426e-06	0.0340713
iXftIjXcUSE8MniSiU	B4GALT5	0.156195	0.0070645	22.1098	6.69418e-17	0.0267959
uuJRRF6UdkIX.N4AUk	SP140L	0.221942	0.0566649	3.91676	6.69326e-05	0.0708438
WVSu6rJC7n1tCMUz3U	CADPS2	1.4327	0.0407104	35.1926	6.69326e-21	0.143402
TIwluhWXRZ5IQJ5TWA	PHACTR1	1.45286	0.0583755	24.8882	6.69263e-18	0.0830694
KlB6fjr0PLCcP3VEVk	VASH2	1.9571	0.0443871	44.0916	6.69239e-23	0.108435
BeVLiOihnIgLni7ViI	ITPK1	0.264822	0.0196423	13.4822	6.69195e-13	0.0500751
EJ5JEtOlSm2WVaViKs	PHF11	0.149351	0.0381295	3.91695	6.68953e-05	0.0505804
Wg6gpQMjjRS01Id0L0	IRAK1BP1	0.109641	0.0279907	3.91705	6.68754e-05	0.042523
ZReJu4g9rquDlHUDu4	LINC00908	1.51175	0.226866	6.66361	6.68669e-08	0.135995
opk7ew1Scew3ScdqKc	PCYOX1	0.309839	0.0652153	4.75101	6.68574e-06	0.0740635
xMzvqBOdn3Vu7ZZbm0	RAI1	0.180559	0.0380028	4.75121	6.68225e-06	0.0468326
HnlBCeqtFDlJctf9IU	LSAMP	1.50456	0.0273241	55.0634	6.68206e-25	0.13747
Zc4v_rqyKrn_Xv_rEo	NUFIP1	0.113993	0.029098	3.91754	6.67817e-05	0.0453235
oiS4TT5f0dSo66B30E	PHOSPHO2	0.251532	0.0243357	10.3359	6.67724e-11	0.0537013
rvRNLp.s5Aznu_hehk	NETO2	0.610082	0.017333	35.1978	6.67305e-21	0.0527509
ontXUcSAXRIESQKMLk	CAST	0.299141	0.0195274	15.3191	6.6702e-14	0.0462463
0.PRu.vXrqQjlN4p9I	ERICH1	0.0626659	0.00940245	6.66485	6.66844e-08	0.0178687
il3dXoTG8kT6T0s_uk	ELMO2	0.0625611	0.0110465	5.66345	6.66829e-07	0.0206679
NDrblACpZpRuSXPZ5E	RPS26	0.415929	0.046275	8.9882	6.66606e-10	0.0375574
l5cXJ5NzDtJ81wp7UY	MAPK6	0.0586273	0.00879626	6.66503	6.66577e-08	0.0157763
iIteqJ97UXteSKLb9Q	CD151	0.376338	0.0418701	8.98823	6.6657e-10	0.0813383
EUlcJSV53lwux1IIB0	PHYKPL	0.193763	0.0187446	10.337	6.66534e-11	0.0402753
Bd6V3FXjeE1UdGDPOU	CD22	0.617781	0.0403256	15.3198	6.66421e-14	0.0649241
BdREVTRUjD8S97wS4o	ZFR	0.0310927	0.00654266	4.75231	6.66286e-06	0.0130816
rpzl_RErvrjqnviOXs	ITGB5	2.86213	0.0580558	49.2997	6.66245e-24	0.186387
ZLUKSIKKUIJQU0IJV0	TCF7	0.541202	0.0353264	15.32	6.66244e-14	0.107448
rAlrkp3ntNtKHX7qe4	SERGEF	0.105255	0.0221481	4.75234	6.66241e-06	0.0297618
QGSUg18Le7v3u3Qh6k	TUFT1	0.465694	0.0698685	6.66529	6.66198e-08	0.0897018
rjkSKESCh_kkq44XjQ	TRAT1	0.420424	0.0630762	6.66533	6.6614e-08	0.102073
9TNQvR3t9eJLoI0z54	TRAF5	0.471256	0.03076	15.3204	6.65946e-14	0.0526957
TeSFNFLiBU_oWJeqJM	HERC2P8	0.0758811	0.0193646	3.91854	6.65888e-05	0.0317922
TPWFKkVX0icqGBJbuc	TBC1D3B	0.202618	0.0426326	4.75266	6.65676e-06	0.0552854
QpILtVL4g3lUigRFRE	SAPCD2	0.55578	0.0618282	8.9891	6.65531e-10	0.0854445
EpBIouKLnnsjhBdT3M	SAT1	0.480094	0.0244787	19.6127	6.65276e-16	0.0368065
99Vf5_kffXnlO4IKO4	CPSF2	0.0922769	0.011876	7.77003	6.65084e-09	0.0268911
KhNKQKSdPRG9SlTh0k	DMXL2	0.188262	0.0242292	7.77006	6.65037e-09	0.0527486
HbeRIp6zv5TSJGmAD4	PSMC2	0.0597633	0.00505096	11.8321	6.64978e-12	0.0139764
lsCU7xiXwoT4LbwrV4	SNORA33	0.260046	0.0663537	3.91909	6.6485e-05	0.0583115
Hf0uzdJqx1J_6T1TuE	ZBTB21	0.216166	0.0278197	7.77024	6.64802e-09	0.0431284
WUSrkrBX63sJFFjUqM	TRPC1	0.292483	0.0516323	5.66473	6.6476e-07	0.0807441
us8SV3ujfQd55dR7jk	LETMD1	0.265572	0.0135402	19.6136	6.64721e-16	0.0377431
c7i4oKf4jr9JXJRR4U	LOC285074	0.439882	0.0253436	17.3567	6.64624e-15	0.0506011
QoyKLD7y6k6j_._or8	ALDH1B1	0.396338	0.083382	4.75328	6.64572e-06	0.0590903
oUuoJKG3qfxr3KhKII	SARS2	0.0838817	0.0176455	4.75372	6.63806e-06	0.0226506
lvrv31_lf_hw7x7UL0	PTPRO	0.782603	0.117386	6.66694	6.63803e-08	0.128343
EfeJJ1S5Sp.iH9UTjA	SLCO2B1	1.53104	0.0347101	44.1092	6.63743e-23	0.133032
KSVT1KtU3taL7s7QtY	DHX33	0.105294	0.026863	3.91969	6.63693e-05	0.0293921
Hq_ffwEuJUU0frO9Cg	TPRG1	1.88215	0.0534578	35.2081	6.6337e-21	0.164822
QjupcAJNtCi5qBZ57k	GIMAP7	5.06024	0.10262	49.3104	6.63252e-24	0.210563
ujAVU3hSATlDXiDBdU	FAM213B	0.272092	0.0408089	6.66747	6.63023e-08	0.0614682
Wb0B7Ud41BXseMsfVI	PPM1B	0.0289075	0.00510204	5.66588	6.62922e-07	0.0116411
KXlOxSLUOKdYL0FPS0	HTR2B	1.62017	0.0515827	31.4092	6.62732e-20	0.152017
QjdRaX_9.wB_DMrqIQ	SKAP2	0.49607	0.0367743	13.4896	6.62695e-13	0.0544822
f3uDfp6h9d4uOXirSc	SUSD1	0.731388	0.0185494	39.4291	6.6261e-22	0.065338
KGQsQrgnrogmpvW4jU	GLTSCR2	0.0381165	0.00972257	3.92042	6.62307e-05	0.0109872
x3PpTep9En4vBfn.Wo	ALOX5AP	1.25564	0.0356607	35.2109	6.62299e-21	0.0650472
oonHKO31JdeS0KLFHs	SKP1	0.111055	0.0195986	5.66645	6.62017e-07	0.0255593
caS6XnqkOk3tGu.3Uk	NSFL1C	0.137147	0.0242029	5.66657	6.61815e-07	0.0403432
rJdVC9Q6P5fdAOxBwk	C1GALT1C1	0.156841	0.0174418	8.99224	6.61785e-10	0.0400669
WuX49HyC7dIAXoS9n0	USP1	0.121747	0.0182573	6.66837	6.61727e-08	0.0246359
0vm6uk4vggpAp_wPxU	NR4A2	0.768505	0.161623	4.75494	6.61671e-06	0.102262
6kmUJpNRQk0L6IAqBU	TM9SF4	0.0522402	0.013324	3.92076	6.61653e-05	0.0200984
34kqEtP.wO._lqbrp0	LRRFIP1	0.318226	0.0669246	4.755	6.61572e-06	0.0413953
i8aiERU6AlF5U5ec2I	LRRC4C	0.504134	0.0755992	6.66851	6.6152e-08	0.106407
KlaUC3KSCXXMECrruk	TMED1	0.0933641	0.0164757	5.66677	6.61503e-07	0.0246581
WYA7zwgBL1pak66dGU	SHROOM4	0.81471	0.122171	6.66859	6.61408e-08	0.0715812
xrlPVJvy.cil0v3U0k	MTHFR	0.182224	0.0321559	5.66689	6.61312e-07	0.0525909
WpwMtCqwzqXvvy7dfU	MPZL2	0.252208	0.0445021	5.66734	6.60595e-07	0.0692529
cJ6F9oVShtjgeN9OeI	PMS2CL	0.143814	0.0159913	8.99327	6.60558e-10	0.0439391
KRXrypIO8CFN_ki9SU	C2orf42	0.12147	0.0182135	6.66921	6.60511e-08	0.0293156
NKXnnitHlH3ROefCok	ZDHHC16	0.134634	0.0113741	11.8369	6.6027e-12	0.02269
cpd7qTZTcRdTjhyYQc	TMEM8A	0.148245	0.0190701	7.77372	6.60225e-09	0.0387738
3iviu9BNvCkdUAZAXU	CCDC50	0.479964	0.040546	11.8375	6.59684e-12	0.0686877
cnkMUe54G3ekT036_Q	ZNF789	0.454688	0.0336976	13.4932	6.59558e-13	0.0596749
9is.Auf4hePTlVQKus	N4BP2	0.631046	0.046767	13.4934	6.5938e-13	0.0879301
xXQSlSoqC7iZfrOHwA	IRF1	0.526676	0.0303312	17.3642	6.59333e-15	0.0456821
3NRFCKu_44rlruQKgc	GPD1L	0.30687	0.022742	13.4936	6.59233e-13	0.052074
feqIx_OmYO1v93V9UU	URM1	0.102776	0.0132196	7.77451	6.59192e-09	0.0213114
6ngbhUunjrngDdflbg	ATP2A2	0.172274	0.0258277	6.67013	6.59178e-08	0.0346935
fKV4uJIooeyriKgIA4	SLC41A1	1.1734	0.0471104	24.9075	6.59161e-18	0.141437
lf1UL5z7CLPeebujks	C6orf62	0.051619	0.0131598	3.92248	6.58393e-05	0.0157832
B3iXW2Vde_rCrvi7h8	ATP6V0E2	0.215757	0.0124245	17.3655	6.58367e-15	0.0300264
xlG8TQRok6KS0p2PX8	SEC23B	0.191023	0.0336974	5.66877	6.58326e-07	0.029454
o6jIqtI5I3cewDqdXo	PGAP2	0.0341407	0.00870367	3.92256	6.58233e-05	0.014666
K_aW49rVntcpqOuWe4	MOCS2	0.0959667	0.0169286	5.6689	6.58107e-07	0.0338242
Ki3QtbOwNI3Vd0VdUU	SPI1	0.196097	0.0189559	10.3449	6.58103e-11	0.0411173
ri7UigEgKDi7uG_eRk	GLOD4	0.105295	0.013542	7.77548	6.57924e-09	0.0233796
EEbT6Knmz_wMl450.o	CHSY1	0.214715	0.0123639	17.3663	6.57838e-15	0.0290094
c5dMl5617CQkcJ1EuU	APOBEC3H	0.908015	0.116776	7.77573	6.57601e-09	0.0862988
BJ6KoI6iJjE0ZOIuGE	PRKD2	0.109167	0.0278278	3.92294	6.57518e-05	0.0346894
uGrsBHjrM0s3iFUB3U	CLDN11	0.188571	0.0480684	3.92297	6.57449e-05	0.0691549
NKNXgi36IAr3uV0rqk	DGKD	1.28463	0.0291102	44.13	6.57335e-23	0.0822262
xiiK0qcKWqOIeSiIiQ	TMEM80	0.150702	0.0167518	8.99617	6.57132e-10	0.0429971
iFJ9Ac7AKH0ULypdeo	MCM8	0.113306	0.0145708	7.77618	6.57001e-09	0.0327987
QWoV50Skp.11Be6Z5I	ACP5	0.589751	0.0236734	24.9119	6.56874e-18	0.0695759
fIU.eS.lQF3Hv6hLCU	SLC38A9	0.129695	0.0125357	10.3461	6.56782e-11	0.0348368
uoT.ogUhToQUzknqTg	GSTM1	9.39371	0.0578141	162.481	6.56591e-35	0.323836
Evziop8AN6g7F.hdek	METTL18	0.0830412	0.0211648	3.92356	6.56344e-05	0.0324775
lt5yU7ny3RdVJUZ6Tw	PLD6	0.199288	0.0221505	8.99697	6.56192e-10	0.0494864
rUcQV_UBElR1P0hZfU	RPP21	0.0676346	0.0119282	5.67013	6.56165e-07	0.0168003
6hfsuJYjZlHudSXqQQ	F2R	0.0828183	0.0146059	5.6702	6.56048e-07	0.0140566
Q91CSC4mep7.LlKea4	PRDX1	0.117811	0.0151487	7.777	6.5594e-09	0.0180839
liWUoFdde0Oquyz.5Q	CTTN	0.42871	0.0414334	10.347	6.55876e-11	0.0677147
fXHKjeF0Lv94lSn164	XPO4	0.0384992	0.00981163	3.92383	6.55823e-05	0.0157961
rcoepWKuvxeRb4dLMs	MYH9	0.0432715	0.00909333	4.7586	6.55299e-06	0.0119838
EtF3iuXnpNd1VOfHDE	TAGLN2	0.153387	0.0270484	5.67083	6.55051e-07	0.0367425
BiglKEaC4iEcCCu6lI	DDB2	0.217737	0.0326292	6.67306	6.54954e-08	0.0433606
6Wpq1EvFJGe3SAGAGg	BRI3BP	0.321474	0.056688	5.67093	6.549e-07	0.0453018
0Nwe7usF_bRonvLgYo	KIF1B	0.376065	0.0150933	24.916	6.54786e-18	0.0450121
37o1dZHBLvdLqSGXqQ	SLC17A9	0.250456	0.0441642	5.67102	6.54759e-07	0.0523278
E13JXoccsWC0ctEyh0	RBBP4	0.191997	0.0338558	5.67103	6.54747e-07	0.0375092
fnkUDT0mUXR5QtE6Go	TNFAIP8	0.0950608	0.0167613	5.67143	6.54114e-07	0.0214489
rZIpCQIpJfpAUoLeoI	HAUS8	0.148472	0.0261788	5.67145	6.54072e-07	0.0409726
QrqXuuOv5NfXV_1QwI	RUSC1	0.139503	0.0155022	8.99889	6.53925e-10	0.0288317
QSm126C4TbfwFebpDU	RPLP0	0.0210204	0.00535572	3.92484	6.53924e-05	0.00741975
ov6uPlCJpN11SSQ1OY	ESR2	0.508517	0.0565087	8.99892	6.53893e-10	0.104842
BXi6rrkpay3lbR.o0w	CRYL1	0.263368	0.0292663	8.99903	6.53768e-10	0.0569357
fxFV3VGC.O.o8TkbuI	MOB4	0.109668	0.0193359	5.67171	6.53675e-07	0.031368
3qBhqf9R4KuCE6SXzw	KANSL1L	0.232203	0.0487861	4.75961	6.53543e-06	0.070155
cTd.vVcvywPhUiuFP4	CBLL1	0.0428298	0.0089982	4.75982	6.53193e-06	0.0163876
fqlQEJ4I55QCTBQ6S4	UBA2	0.190975	0.0401212	4.75994	6.52976e-06	0.0482998
KW6.sdAlSDVQuXn.jg	CDH1	5.65069	0.0533536	105.91	6.5292e-31	0.267263
iLomllojl4ZN7eKJrQ	SNURF	0.106574	0.0271485	3.92559	6.5251e-05	0.02667
ueMSoPu3ShNcU4RLEo	EAF2	0.545527	0.0173549	31.4335	6.52503e-20	0.0486912
WXl3v.V2IUlB3RP0tY	BRE	0.052058	0.010936	4.76022	6.52501e-06	0.0193873
01kigeOLuQ_IkyS6SU	CTSC	0.213642	0.054422	3.92565	6.52398e-05	0.0323688
91V_0SAUqHfSj_I6X4	COQ2	1.04645	0.0883438	11.8452	6.52349e-12	0.0700038
cqcdO17JS9NdMMIOpI	GSTA4	1.00342	0.022729	44.1468	6.52191e-23	0.118401
WQuX3Ua5D0h9LjdS60	LRRFIP2	0.517244	0.0337231	15.338	6.5214e-14	0.054967
3ebvSAX7jt_HvkUp4g	COMMD8	0.222633	0.0113393	19.6338	6.51843e-16	0.0288171
iWCth3hT5.UdUnOigo	TNFRSF17	0.672165	0.0190746	35.2388	6.5177e-21	0.0456271
TWu_TX6IieInosSBec	PMS2P5	0.143982	0.0302443	4.76064	6.51768e-06	0.0332572
ThQC4HM30IR7f.qlK0	CHPT1	0.709508	0.0598948	11.8459	6.5163e-12	0.0743561
lmf3XcQ2dFE11YAu7o	APOM	0.068914	0.0144755	4.76074	6.516e-06	0.0327907
3Aq_iknpEIp4peng8U	OAS1	1.26686	0.0402998	31.4358	6.5156e-20	0.0719749
KqedeJ0u0K49B7LlIQ	C17orf58	0.783555	0.019856	39.4618	6.51495e-22	0.076419
lrTzfcSS6Di61aI7nM	IKZF3	0.539508	0.0599375	9.00117	6.51263e-10	0.0763909
0XpPp_uiiXOjCuigoU	RDM1	0.336659	0.0325231	10.3514	6.51199e-11	0.0605525
KPqFUxbyV_zsxQR5QI	RHOBTB3	3.14699	0.033091	95.101	6.51174e-30	0.152364
Td9zVITqUK57N4qO54	RCOR3	0.11687	0.0205997	5.67335	6.51084e-07	0.0283251
KDct6V64dGX9opIrqI	APOBEC3D	0.163475	0.02101	7.78079	6.51029e-09	0.0356134
9knoESip7oAHz4Im2U	MNS1	0.193591	0.040661	4.76111	6.50969e-06	0.0623218
ZirTd9z7F5JGfXqe8Q	ALG13	0.24815	0.0161769	15.3397	6.50789e-14	0.0342777
9oI3rP16XA9V_qKEqI	FCGR2B	0.602703	0.0241814	24.9242	6.50572e-18	0.0530924
K0ko.7J4eud4qIuXJI	THNSL1	0.228975	0.0294266	7.78121	6.50482e-09	0.0470191
9iDnutZBFSNhB16q3g	LGALS9	0.255699	0.0450649	5.67401	6.50049e-07	0.0415515
Ho4OiKECkn3hEUlUoU	MAP3K6	0.681306	0.0392047	17.3782	6.4948e-15	0.0972001
ui4eB8ge_oO9SO3EVI	SPAG16	0.143152	0.0120822	11.8482	6.49475e-12	0.0331672
HCA7U5JT.1BI57EW9M	STAG1	0.0841371	0.017668	4.76212	6.49223e-06	0.0256385
0VIE_Rjl14U5SLDdJ8	ERICH1	0.049595	0.0126277	3.92748	6.48977e-05	0.0196535
rde4qmtUuRI7.0L10s	TTC38	0.16452	0.02114	7.78242	6.48917e-09	0.0346728
rXpX3TlQhL79Eougu4	CSRP2BP	0.110141	0.0280433	3.92754	6.48864e-05	0.0503918
6ip.voLuHQ35eX3qJ0	DVL3	0.12071	0.0212707	5.67495	6.48585e-07	0.0342211
HVS0Y.k73ewn01OevM	TANC1	2.47004	0.0500371	49.3642	6.4843e-24	0.183985
xpehHzqhJMX6HhxScE	HNF1B	4.91258	0.027165	180.842	6.48369e-36	0.187723
BVAAoikiCA4ldXaYJc	ISCU	0.372922	0.0243054	15.3431	6.48141e-14	0.0428173
x9d6eNUlcCgqyFbt.U	BCL2L13	0.0416258	0.0105972	3.928	6.48016e-05	0.0152916
9Sft35eUe7g2mGiR5E	AXIN1	0.0997243	0.00841574	11.8497	6.47991e-12	0.0277185
uucuo1cSjZzvXzR3lY	FAM135A	0.144087	0.0215765	6.67796	6.47964e-08	0.0452816
9eebDoPl_ITUgjUFYM	CENPK	0.310901	0.0399417	7.78389	6.47039e-09	0.0416813
To5SSeSQkr.11e_JCE	SLC10A2	2.94245	0.0666248	44.1644	6.46859e-23	0.229144
K6bnLqOkjigghVG.ig	TAF13	0.123355	0.0258952	4.76365	6.46618e-06	0.0490257
WrvoG0TB.oQhegqi4U	NANS	0.212783	0.0273351	7.78425	6.46576e-09	0.0380526
rnE3rF_npPOoOK9xR0	TMEM14C	0.0657892	0.0138102	4.7638	6.46361e-06	0.0179833
omuAgUECFzXronhdeo	TMEM189	0.0660174	0.0168028	3.92896	6.46227e-05	0.0233552
cMHbe1Kv_unpgnipu0	NUP214	0.088793	0.0186386	4.76393	6.4614e-06	0.0263135
HzqJNpx567t9VBpGis	CD74	1.17551	0.0598426	19.6434	6.45823e-16	0.0824594
rXqX_eExSVSHHwPSf8	TRAPPC2L	0.523233	0.0300995	17.3835	6.4579e-15	0.0737068
BMozoilXp9OIECkpUo	SEC22B	0.113692	0.023863	4.76436	6.454e-06	0.0267437
NX46UoAwCCe37Ya3R4	POMZP3	0.746685	0.0629981	11.8525	6.45368e-12	0.115014
iiipihinwAfdI0NuTU	TUBB2A	2.19662	0.0497316	44.1695	6.45342e-23	0.13121
oCkSogqMFcRUhVKehM	CD74	0.108287	0.00801542	13.5098	6.45255e-13	0.0163363
0eucdTkqtLkkihLeiA	HBEGF	0.388558	0.0327819	11.8528	6.45078e-12	0.0739115
6OBBppAliCiBFWJilA	RBPMS	0.591109	0.0884864	6.68022	6.44766e-08	0.120814
EuSXgo0uyw5SgLn.xc	UBQLN2	0.0610642	0.0155388	3.92979	6.4468e-05	0.0197446
iFGqIV01eVe7p5kLPc	SAMD10	0.225435	0.0250282	9.00724	6.44203e-10	0.0594358
9SqOJnFL9P7KSovdZo	FAM89A	0.214546	0.0545907	3.93009	6.44123e-05	0.0744289
upUk6dF7Vup7v377.0	LFNG	0.769075	0.034715	22.154	6.44088e-17	0.106713
34jhDd_BUopor5LieI	GJC1	0.345046	0.0607701	5.67789	6.44e-07	0.0318125
HrnXlRFJR.rhDhX1CA	CMTM3	0.828744	0.0421831	19.6464	6.43975e-16	0.103982
32XiiRKCAggmeSvl64	MSL3	1.20207	0.0482037	24.9372	6.43969e-18	0.0794355
uhKJ6Cu.DgZ5YPR9CU	CCDC58	0.684688	0.0446092	15.3486	6.43961e-14	0.0589376
lfQux3sp96itX.Sq7U	INHBE	0.904901	0.230237	3.9303	6.43745e-05	0.10161
3X10r9WIq4EhtJlO.U	ZNF841	0.387005	0.0429638	9.00771	6.43667e-10	0.064348
osj1QiH8ktFJfDk7Eo	AFF3	6.40837	0.0604666	105.982	6.43531e-31	0.332264
9ndUbcRU0XUl4qZB4g	NDUFAF3	0.383026	0.0803754	4.76547	6.43515e-06	0.0966459
o3qVxJeiBeiDXEVEgU	XAF1	1.07785	0.0384576	28.027	6.43474e-19	0.0608297
3msULXnfY6rp4iMCvU	BTBD7	0.0779635	0.01373	5.67831	6.43353e-07	0.0333413
K57zV5etdEdFQQ1QpU	WAS	0.0596217	0.0125107	4.76565	6.43199e-06	0.014923
E9VUedIhpiBzvufeh0	NOMO1	0.263926	0.0292981	9.00831	6.42964e-10	0.0478877
rNWwSR7oMRXwQvol6Y	SORL1	0.233034	0.0258683	9.00851	6.42736e-10	0.0332495
66kEOpN9TlFFSkwUvo	CAND2	0.399908	0.0443921	9.00854	6.42707e-10	0.0940794
0_qAhAie1eKl7IyeXU	UFD1L	0.12283	0.0257717	4.76607	6.42483e-06	0.044673
uhScUXyfTVcfkUFLVo	RNF216P1	0.0929522	0.0139109	6.68197	6.42301e-08	0.0290733
60dE_G1HtXkXnH0qkc	RNF207	0.202231	0.0424303	4.76619	6.42285e-06	0.0669347
BgnCcruCDoPoJUeX1Q	AASDHPPT	0.0690489	0.0144869	4.7663	6.42101e-06	0.022681
EpTVAnPeqkEiuAcepQ	FUCA2	0.208225	0.0311611	6.68219	6.41997e-08	0.0435369
K5WlOenU0OC6f1FeOI	SNRNP40	0.115992	0.0295037	3.93142	6.41658e-05	0.0278788
05.K._ASVaYZdz6d2k	H1FX	0.574582	0.0425175	13.514	6.41655e-13	0.0701746
W38p0ogk.wIBVRXllY	A4GALT	1.14769	0.0259762	44.1822	6.41517e-23	0.0847355
WV_hIIelxckhej.314	C9orf91	0.4919	0.0197217	24.9421	6.41502e-18	0.059032
oqiroIDroezd0b3gkk	UHRF2	0.122687	0.0312047	3.93167	6.41208e-05	0.0349379
6t3N9OLuH4rvqOriok	ARHGAP9	0.289032	0.0278956	10.3612	6.40905e-11	0.0341664
B.7mrn_C5fk0qPKJDw	TDG	0.0757937	0.0113408	6.68327	6.40477e-08	0.0178189
Hl_fyRKzglIJSTdB7k	POLR1E	0.135904	0.0150826	9.01065	6.40275e-10	0.0239895
9kXkikp9InUUlNDlKc	TCTN1	1.08106	0.0273718	39.4954	6.40254e-22	0.083944
NU3FdxRfkS6ketHXO4	ZIK1	0.27081	0.0300541	9.01074	6.40167e-10	0.0593434
9HEI7.o8Fp5Iq0Kfec	ETNK1	0.292582	0.0613705	4.76748	6.40109e-06	0.0610204
xUu3o65RHplw0VvwQk	YIPF1	0.10164	0.0130485	7.78935	6.4007e-09	0.026892
f.uF_66iJIroZpYiVw	GNPTG	0.18434	0.0324494	5.68085	6.39438e-07	0.0399162
HyCkilpI0fiVKL6IUg	SPC24	0.150533	0.0264983	5.68087	6.394e-07	0.0307906
Bl1ZGRZkl57lbq1Yuc	SPG21	0.299261	0.038416	7.79003	6.39206e-09	0.0570063
6V7eMioFXseB.u_FMk	SH3BGRL2	0.659302	0.048776	13.517	6.3918e-13	0.117116
0VxRQHTYShYtXAWdTI	LSP1	0.422952	0.0469337	9.0117	6.39077e-10	0.055454
r4UKUSJzq7SRSj_CUo	HSH2D	0.118864	0.0302227	3.93294	6.38866e-05	0.028372
BGiPJam66TmXutcnPc	LOC399900	0.503449	0.0646249	7.79033	6.38819e-09	0.0405224
Tq_3QNe1EKQdSCAglc	SYT15	0.155237	0.0273242	5.6813	6.38734e-07	0.0490878
T0iv0uJQjZFHndSXpg	LILRB1	0.260837	0.0219933	11.8598	6.38505e-12	0.0269953
WVej5VLXuFO_V4IIU0	UBE2F	0.11468	0.0110656	10.3637	6.38325e-11	0.0225018
6Uo7ckVU1X6V9dOfeA	RELB	0.145545	0.0140437	10.3638	6.38235e-11	0.0368197
inpT8ig9yhLqJ7vHJE	USP8	0.0436203	0.00914735	4.76862	6.38173e-06	0.0186875
legNVGV79X8237r6Ho	IMP3	0.043786	0.00770652	5.68168	6.3815e-07	0.0126905
363QqASg7R.hXt_gbY	SPCS3	0.359943	0.011438	31.4692	6.37852e-20	0.0397273
cdJWE1BKZQHRIlfuSM	BATF3	0.574688	0.0425111	13.5186	6.37827e-13	0.0578993
Knl3qArhuSe.jdSAJ0	WDR34	0.185162	0.0237657	7.79116	6.37767e-09	0.0429739
0xUgV0IS0uoWQIXqXc	MB21D1	0.20569	0.0362005	5.68197	6.37706e-07	0.0492854
fEk0L3mqUU2Wl7d17c	ALKBH7	0.0938373	0.0238554	3.93358	6.37688e-05	0.031041
0t9BJAtEJY7ooR0qLU	DOPEY1	0.188726	0.0209393	9.01298	6.37602e-10	0.050066
6RQiuvAlM_iyYoN49Q	SNRPN	0.126072	0.0320498	3.93363	6.37598e-05	0.0361979
6zxLkDfq_HR.Cv3h5U	GJA3	2.45061	0.0356518	68.7373	6.37402e-27	0.170683
iJ6OnjpKeJLqgkr.BA	PHLDA1	0.15549	0.0273645	5.68218	6.37387e-07	0.0557007
EUuX6BeeX6oV6G5YTM	PEMT	0.141475	0.0211611	6.68559	6.37239e-08	0.0339264
BvS5z3VJyvzU4KHi4U	PDE3B	1.10126	0.0928418	11.8616	6.36794e-12	0.153815
u16lXhKZ6e4uv7E5xA	TSPAN17	0.191643	0.0184889	10.3653	6.36674e-11	0.0323713
lkWrpI73OS7r0L9.hY	PALLD	4.07766	0.0922572	44.1989	6.36566e-23	0.246928
cKgKgtuiKSoA68JJWk	CCNY	0.0925535	0.0194049	4.7696	6.36526e-06	0.0320386
EUk3_443orP55056WQ	CENPT	0.12024	0.0252093	4.76965	6.36448e-06	0.0353457
3TpLZ_gVHRFDUuFu7o	DYNLRB1	0.0355392	0.00903283	3.93445	6.36095e-05	0.0144716
oi5daXVTUXeXCwN53Q	ANKRD33	0.198897	0.0255241	7.7925	6.36077e-09	0.0520438
3ERdCVTludNcVUNXUM	DCXR	0.082896	0.0173779	4.77021	6.35506e-06	0.0237954
9epBIuAXtXv9ed8d0U	SLC35F6	0.181888	0.0320024	5.68356	6.35275e-07	0.0585723
6fIJR4Q903itTlJCfU	SQLE	0.150519	0.0225092	6.68701	6.35259e-08	0.0311753
6q0bt.ri4ghcB16U00	AFAP1L2	2.64003	0.0941349	28.0452	6.35237e-19	0.225469
BNHPXrzdFBgpyimm0g	NFIB	5.63139	0.0913905	61.619	6.35193e-26	0.272783
rdd9atbqYt9NwqFCMc	KRT10	0.194554	0.0215809	9.01511	6.35176e-10	0.0314167
3qwoqLpfiEfs9QHdeg	DSTYK	0.35194	0.0619216	5.68364	6.35154e-07	0.0896276
QgqHUvlCvjeASkqJwk	KLHL6	2.57441	0.0335791	76.6673	6.34725e-28	0.150626
Q2bdffRdqtYgXEWbog	OGFOD3	0.157672	0.02774	5.68392	6.34722e-07	0.0423906
HhaCQVfRIRiRNpAVzg	GAS7	2.58017	0.0653005	39.5123	6.34698e-22	0.129617
34Kf76KoSJEoEl_Et4	ELMSAN1	0.114203	0.0200913	5.68418	6.34322e-07	0.0249629
xA4dV3ldlWZ3nFP18Y	DUT	0.106673	0.0223589	4.77093	6.34291e-06	0.0375717
l6VyLqLXjBUpe3hx.k	RB1	1.31839	0.0238833	55.2012	6.34265e-25	0.0887573
9nIOLxSIkn6ivj3rbY	ACADM	0.0644852	0.0163854	3.93553	6.34123e-05	0.0166857
rZ1e6.uVHnQxJdY10c	AP3S2	0.0788551	0.0117908	6.68788	6.34059e-08	0.0328784
Qf55R5Sl3leSeAfpTQ	INF2	0.276852	0.0267028	10.3679	6.34005e-11	0.0613383
TXVRJtLgLbX7dIOFKo	AGRN	0.24473	0.0271433	9.01621	6.33924e-10	0.0428704
HpJXi5Tjd3ID1kLQTQ	GPN3	0.148258	0.0221672	6.68817	6.33654e-08	0.0284617
BseDuoCXEvvXbV9u5E	ZNF77	0.213555	0.0375666	5.68471	6.33521e-07	0.0604476
Z3tHSez0beJL3ksEXk	MFF	0.126899	0.012239	10.3684	6.33505e-11	0.0273125
N_qS0pP7N.rKkELAE4	C4orf32	0.514598	0.0232082	22.1731	6.33437e-17	0.0623328
QjuMi7uqd7tfV6iek8	TEF	0.104723	0.0266067	3.93595	6.33369e-05	0.0454414
iMeiqS6uUsu15619eA	LACTB	0.278282	0.0125502	22.1736	6.33183e-17	0.0320294
fn1IPzBE4lVACWoekk	RGS10	0.364947	0.0103415	35.2895	6.33059e-21	0.0325435
Qd3Xe10071J3cSpRMc	TTC5	0.124952	0.0186813	6.68862	6.33027e-08	0.036485
rL_WHgi7qP1ilSuJG0	ZBTB46	0.586805	0.0650775	9.01702	6.33008e-10	0.102313
9oiqK0d.466V4F0968	ST3GAL5	1.01429	0.0256664	39.518	6.32823e-22	0.113185
Q9Vq6GG5_bV5K3fZEI	SEC14L1	0.461062	0.0184721	24.96	6.32556e-18	0.0656678
WVHrohnz3HoWnnsX0o	RRNAD1	0.0927369	0.0194332	4.77208	6.32381e-06	0.0321356
TFIWCCIPoaWOul3XBQ	ANKHD1-EIF4EBP3	0.118718	0.0248774	4.77211	6.32326e-06	0.0462713
B9D_FSZdtuuJdO8Rpk	PPP2CB	0.135959	0.0174407	7.79552	6.32281e-09	0.0294016
fTlw44XHSVeUE09Dx0	ZFHX4-AS1	1.00028	0.149537	6.68918	6.32255e-08	0.168155
oiZs6LoBn7Kn0UrCa4	SMA4	0.208491	0.020106	10.3696	6.32253e-11	0.0516836
Ei326OO4U_KF7SnE6I	OSER1	0.224011	0.0287357	7.79558	6.32214e-09	0.0324916
BXUjpPTt8dICpHlPtU	PAQR8	0.715196	0.0227161	31.4841	6.31823e-20	0.0694272
6pcH6JO0elOquKoSHc	ZBED6CL	0.0806312	0.0204808	3.93692	6.31606e-05	0.040762
9XKsy9KrNQ1.p9XqU4	UQCR10	0.132734	0.0233441	5.686	6.31556e-07	0.0352391
lNSX0dSevADvkfNJBU	MBNL1	0.115476	0.0203085	5.68611	6.31388e-07	0.0218095
6VYPhBUB3UhNFB7VeY	IKZF1	1.63872	0.0370608	44.217	6.31203e-23	0.108674
BeoifQooIqj64IHpTU	CFDP1	1.01837	0.0288533	35.2946	6.31197e-21	0.0730173
uHreSe986yS_6T13uo	SNORA41	0.523532	0.109691	4.7728	6.31179e-06	0.0826767
0eKLH0RSdfVemNInSs	HPS1	0.0968157	0.0202842	4.77296	6.30916e-06	0.0388346
uV3PNRBCU27_VK0uqI	APOO	0.0767982	0.0195049	3.93738	6.30766e-05	0.0233791
ruGnrh46OrLqeIIqhw	KIFC2	0.251998	0.0443141	5.68663	6.30597e-07	0.05429
xp3z31EIih.dKV6_cU	HLA-DRB5	29.5705	0.0778271	379.95	6.30514e-43	0.7529
6ci5bNNIfFe15VF9Xk	USP24	0.503445	0.0127373	39.5252	6.30457e-22	0.0528389
3ioggwJJ5eiXPRzvz4	TUBA4A	0.484133	0.0620922	7.79701	6.30416e-09	0.045738
WyM_9RTVXX6V9C6ngk	ZDHHC18	0.130471	0.0229425	5.68685	6.30267e-07	0.0360455
xSR6B9_JKJMVKn0w0U	RAD51C	0.106431	0.0118002	9.01947	6.30229e-10	0.023393
iSehC.8DhFFCXupfdc	BCCIP	0.0944211	0.0197805	4.77345	6.30093e-06	0.0234885
KeeFXj98gM1RMNSfNU	USP48	0.306238	0.0122667	24.9649	6.30087e-18	0.0382687
KkABFFdQSXfKLEV73k	TXLNG	0.300782	0.0172797	17.4066	6.29941e-15	0.049991
ZqhHVJVd7d_c8eefeM	EFNA4	0.0916369	0.0161131	5.6871	6.29882e-07	0.0380977
Qn9O1SB8l.F7gu8cSU	CYP1B1	6.75698	0.046179	146.321	6.29847e-34	0.176366
WFwa905rmw_yOTsfu4	NPTN	0.0403801	0.0102541	3.93796	6.29709e-05	0.0139098
KxNyKUIiSiInFB8R7o	USP47	0.281835	0.0312451	9.02012	6.29499e-10	0.0646409
crpRMJTz0cs4cvu3pI	GHR	5.48393	0.703266	7.79781	6.29423e-09	0.411946
KedHu197rdKJ5L7574	MBP	0.230688	0.0104003	22.1808	6.29193e-17	0.028708
W5KEOeUil610idGwk0	C1QTNF9B	0.201091	0.0510604	3.9383	6.29102e-05	0.0710847
HqCKfuFLFDfi.f.e1E	GOLPH3	0.192457	0.0213355	9.02051	6.29063e-10	0.0300268
B0lK3X1ev1LREiVJJ8	DBNDD1	2.33827	0.0936532	24.9673	6.28924e-18	0.144839
oq0RwXtH76iTiSf3t4	PPFIA1	0.199255	0.0255513	7.79825	6.2888e-09	0.0512843
ZVVCvevU.9d70QHF3o	HMGA1	0.125038	0.0317477	3.93848	6.28765e-05	0.024481
fUr.XrdIXOOH7V.jtE	CHMP2B	0.0508549	0.0106518	4.77431	6.28673e-06	0.019368
3nqSAeSkRP6ujRen1I	ANKFY1	0.076523	0.0194291	3.93858	6.28594e-05	0.0253426
c9Pl_7XedaiH2uPeUc	ZNF519	0.168469	0.0296183	5.688	6.28516e-07	0.0475605
f0gM68T6BE4sV0.d0w	OAS1	0.956151	0.105989	9.0212	6.28275e-10	0.121183
xQl1XNSVT3IHk9IoRE	LCMT1	0.108579	0.0162248	6.69213	6.28194e-08	0.0298016
ufoTZ9l1LF7ujXaYb8	NAPSB	1.80824	0.0919184	19.6722	6.28065e-16	0.0838323
f8fArFgoKUrkunRlSQ	TDRD1	0.515895	0.0770883	6.69226	6.2801e-08	0.077791
rXg2T3ceh3pefoiukk	PSRC1	0.437119	0.032305	13.531	6.27461e-13	0.0740132
WUqkqw6vmM6nCSTkKc	PPM1A	0.176633	0.0310497	5.68872	6.27433e-07	0.0478966
ceSfbLHV9axcfEX1OQ	PSMG2	0.0572431	0.00634485	9.02199	6.27391e-10	0.0142521
TsHsL0TgXbq.6fKesk	UQCRHL	0.0840879	0.0176092	4.77521	6.2717e-06	0.0163451
rRI_pNFNyD9L8Kil5k	GALK2	0.263188	0.0668093	3.9394	6.2712e-05	0.0611921
H0knv6XD3yTz.tf5lI	SEPHS1	0.37197	0.0476904	7.79969	6.27085e-09	0.0491559
Bnu6R9etwJ3nIQ_a4k	MFSD8	0.0901371	0.0228804	3.9395	6.26939e-05	0.0291456
ZStuSAH4h6r0qfuqt4	IL3RA	0.474422	0.0272482	17.4111	6.26907e-15	0.0730915
3NpGp3qdVuiIJ7L.xQ	GRAMD4	0.303302	0.0224139	13.5319	6.26722e-13	0.0606194
KSggllXXeqUz.3nq0Q	SOBP	0.215409	0.0276157	7.80022	6.26425e-09	0.0640609
Tun_CighF_JQoOCql4	MTERF1	0.0652503	0.0165611	3.93998	6.26063e-05	0.0259047
iYLSAHTTSmGV6aerog	ATP1A1	0.149896	0.0192158	7.80064	6.259e-09	0.025444
xONB.H0qk_3r3.nnvk	SLC25A40	0.183261	0.0176616	10.3762	6.25521e-11	0.0351412
[truncated: 13,592 more rows]
