# Supplementary material for: Integration of genomics and transcriptomics predicts diabetic retinopathy susceptibility genes
Source: eLife. 2020 Nov 9;9:e59980. doi: 10.7554/eLife.59980 (PMC7728435; doi:10.7554/eLife.59980)
Supplement: Figure 2—source data 1. [file elife-59980-fig2-data1.xlsx]

## Sheet: Table 1
SampleName rep Subject Group 1 1 1 1 DwC 2 1 2 1 DwC 3 1 3 1 DwC 4 8 4 2 DwC 5 8 5 2 DwC 6 8 6 2 DwC 7 2 7 3 DwC 8 2 8 3 DwC 9 2 9 3 DwC 10 3 10 4 DwC 11 3 11 4 DwC 12 3 12 4 DwC 13 4 13 5 DwC 14 4 14 5 DwC 15 4 15 5 DwC 16 5 16 6 DwC 17 5 17 6 DwC 18 5 18 6 DwC 19 6 19 7 DwC 20 6 20 7 DwC 21 6 21 7 DwC 22 7 22 8 DwC 23 7 23 8 DwC 24 7 24 8 DwC 25 12 25 9 DwoC 26 12 26 9 DwoC 27 12 27 9 DwoC 28 1…
29 14 29 10 DwoC 30 14 30 10 DwoC 31 15 31 11 DwoC 32 15 32 11 DwoC 33 15 33 11 DwoC 34 9 34 12 DwoC 35 9 35 12 DwoC 36 9 36 12 DwoC 37 10 37 13 DwoC 38 10 38 13 DwoC 39 10 39 13 DwoC 40 11 40 14 DwoC 41 11 41 14 DwoC 42 11 42 14 DwoC 43 13 43 15 DwoC 44 13 44 15 DwoC 45 13 45 15 DwoC 46 21 46 16 NoD 47 21 47 16 NoD 48 21 48 16 NoD 49 22 49 17 NoD 50 22 50 17 NoD 51 22 51 17 NoD 52 16 52 18 NoD 5…
58 18 58 20 NoD 59 18 59 20 NoD 60 18 60 20 NoD 61 19 61 21 NoD 62 19 62 21 NoD 63 19 63 21 NoD 64 20 64 22 NoD 65 20 65 22 NoD 66 20 66 22 NoD
