# Supplementary material for: Integration of genomics and transcriptomics predicts diabetic retinopathy susceptibility genes
Source: eLife. 2020 Nov 9;9:e59980. doi: 10.7554/eLife.59980 (PMC7728435; doi:10.7554/eLife.59980)
Supplement: Figure 2—source data 2. [file elife-59980-fig2-data2.xlsx]

## Sheet: delta_DwC_DwoC_pvalue_0.05_log2
ID	geneSymbol	geneName	logFC	AveExpr	t	P.Value	adj.P.Val	B
3TXADqtSkhV1IXRHlg	RASA3	RAS p21 protein activator 3	-0.263985	-0.0275434	-4.46867	3.07219e-05	0.478278	1.52532
34lG83aZ6.WLFnge6s	HBQ1	hemoglobin subunit theta 1	-0.395584	-0.00470498	-4.21704	7.5187e-05	0.585255	0.866053
oS67lguv5HpU4i6Pvg	RIMKLA	ribosomal modification protein rimK like family member A	0.410776	-0.0436551	3.93918	0.000195941	0.999464	0.160066
ZJ5no6EWX5Hvo96s4Q	ADAM23	ADAM metallopeptidase domain 23	-0.317889	-0.0122656	-3.5141	0.000791685	0.999464	-0.867654
ZlekT1T_57rs17v1_0	CPA4	carboxypeptidase A4	-0.263785	-0.00903867	-3.36224	0.00127519	0.999464	-1.21736
HpLUWXaXFguco8SGwk	CENPH	centromere protein H	-0.275284	0.0219053	-3.31252	0.00148659	0.999464	-1.3297
912ny6eCHjnlY2XSCU	UCA1	urothelial cancer associated 1 (non-protein coding)	0.268151	-0.00499911	3.31058	0.00149549	0.999464	-1.33407
3Uleb9T3l90i5X55FQ	SLC48A1	solute carrier family 48 member 1	0.270582	-0.0216911	3.19987	0.00209375	0.999464	-1.58009
ZOluqaxSe3ndekoNng	FLCN	folliculin	0.275674	-0.034156	3.12973	0.00258203	0.999464	-1.73301
r7vwBLWuVF6tROSeko	RGPD1	RANBP2-like and GRIP domain containing 1	0.420663	-0.0383037	3.10013	0.00281842	0.999464	-1.79684
0tUv1R3gjVBOtckeRE	PADI4	peptidyl arginine deiminase 4	-0.299158	0.067293	-2.80585	0.00654689	0.999464	-2.40775
odF3XHR8CVl4SAUaUQ	IL1B	interleukin 1 beta	0.28909	0.009726	2.73127	0.00803799	0.999464	-2.55543
lVMMSqiUfqSikqKrU8	ASNA1	arsA arsenite transporter, ATP-binding, homolog 1 (bacterial)	-0.287373	-0.0670171	-2.67274	0.00941906	0.999464	-2.66919
6iq_of.H0cogfsEU6o	BBS9	Bardet-Biedl syndrome 9	0.320131	0.034845	2.59757	0.0115097	0.999464	-2.81253
QjkdF2l1QLnqPEpuJQ	TRIM16L	tripartite motif containing 16-like	-0.341808	0.0372124	-2.35901	0.0212172	0.999464	-3.24589
f5_h7f4HeRdfUpTfuI	RNF217	ring finger protein 217	-0.412679	0.0648299	-2.23543	0.0286921	0.999464	-3.45701
6ur92ermG4P7gnSjlQ	DNAJC12	DnaJ heat shock protein family (Hsp40) member C12	0.266867	-0.0896094	2.19714	0.0314373	0.999464	-3.5205
ZrKqxxyoze6Tjzk9bI	GPM6A	glycoprotein M6A	0.26457	0.0352989	2.1017	0.0393047	0.999464	-3.67474
Eq3gjglX3qijwC4460	NUCKS1	nuclear casein kinase and cyclin dependent kinase substrate 1	0.298782	0.0211055	2.02229	0.0471007	0.999464	-3.7986
