# Supplementary material for: Integration of genomics and transcriptomics predicts diabetic retinopathy susceptibility genes
Source: eLife. 2020 Nov 9;9:e59980. doi: 10.7554/eLife.59980 (PMC7728435; doi:10.7554/eLife.59980)
Supplement: Figure 2—source data 3. [file elife-59980-fig2-data3.xlsx]

## Sheet: delta_DwoC_DwC_pvalue_all_2017-
ID	geneSymbol	geneName	logFC	AveExpr	t	P.Value	adj.P.Val	B
3TXADqtSkhV1IXRHlg	RASA3	RAS p21 protein activator 3	0.263985	-0.0275434	4.46867	3.07219e-05	0.478278	1.52532
34lG83aZ6.WLFnge6s	HBQ1	hemoglobin subunit theta 1	0.395584	-0.00470498	4.21704	7.5187e-05	0.585255	0.866053
oS67lguv5HpU4i6Pvg	RIMKLA	ribosomal modification protein rimK like family member A	-0.410776	-0.0436551	-3.93918	0.000195941	0.999464	0.160066
Qpc2sX7gp.W5E2rRS4	FMC1	formation of mitochondrial complex V assembly factor 1 homolog	0.164747	0.0369476	3.73291	0.000390082	0.999464	-0.347133
NqsVOy_yos30cOQRSE	MMADHC	methylmalonic aciduria and homocystinuria, cblD type	-0.133915	0.0173996	-3.67355	0.000473781	0.999464	-0.4902
B3SDpegGjpdxnvU0S0	ARFGEF2	ADP ribosylation factor guanine nucleotide exchange factor 2	-0.158119	0.0144993	-3.66576	0.000485953	0.999464	-0.508864
ZJ5no6EWX5Hvo96s4Q	ADAM23	ADAM metallopeptidase domain 23	0.317889	-0.0122656	3.5141	0.000791685	0.999464	-0.867654
lpfvpLHXvCU8t3A9Sc	TRAPPC8	trafficking protein particle complex 8	-0.13727	-0.00196971	-3.51403	0.000791858	0.999464	-0.867814
fcp9ebuwC2Kz56T0q4	SPIRE1	spire type actin nucleation factor 1	-0.139343	-0.0292607	-3.43325	0.00102196	0.999464	-1.05507
6MeKXoSuC4UiJAKQKo	KCNK3	potassium two pore domain channel subfamily K member 3	-0.252476	0.0299583	-3.39836	0.00113975	0.999464	-1.13507
9beWACXVqEQRpRgRVY	RNF126P1	ring finger protein 126 pseudogene 1	-0.235895	0.0287216	-3.37365	0.00123086	0.999464	-1.19144
0rliIY6gA3JIx3gQ1I	CWC22	CWC22 spliceosome associated protein homolog	-0.176438	-0.0068359	-3.36517	0.00126366	0.999464	-1.21071
ZlekT1T_57rs17v1_0	CPA4	carboxypeptidase A4	0.263785	-0.00903867	3.36224	0.00127519	0.999464	-1.21736
lUKCdI5eS08r.JtU4k	CEL	carboxyl ester lipase	0.220329	-0.00828188	3.32109	0.00144793	0.999464	-1.31041
HpLUWXaXFguco8SGwk	CENPH	centromere protein H	0.275284	0.0219053	3.31252	0.00148659	0.999464	-1.3297
912ny6eCHjnlY2XSCU	UCA1	urothelial cancer associated 1 (non-protein coding)	-0.268151	-0.00499911	-3.31058	0.00149549	0.999464	-1.33407
xVs0dJe18BpdlO5PtE	METTL17	methyltransferase like 17	0.133623	0.0163563	3.29684	0.00155982	0.999464	-1.36489
KqvCvTiBToCO63iOrk	CYTIP	cytohesin 1 interacting protein	-0.12666	0.00219405	-3.29667	0.00156065	0.999464	-1.36528
3Qp_0JLudNE6wNOSbo	CSNK2A1	casein kinase 2 alpha 1	-0.163555	0.030935	-3.28136	0.00163546	0.999464	-1.39954
ocv.0ZeQ36Lcr5ft3U	SOWAHC	sosondowah ankyrin repeat domain family member C	-0.234116	0.00438464	-3.21821	0.00198115	0.999464	-1.53971
3Uleb9T3l90i5X55FQ	SLC48A1	solute carrier family 48 member 1	-0.270582	-0.0216911	-3.19987	0.00209375	0.999464	-1.58009
NvkTSXb3V1HoOTu9Hk	TXLNG	taxilin gamma	-0.228642	0.017371	-3.19512	0.00212385	0.999464	-1.59051
Wu17hRSKTiKhBEd.2c	FAM219B	family with sequence similarity 219 member B	-0.139147	-0.00662436	-3.19024	0.00215524	0.999464	-1.60122
Eqlesp1.IKFP3vXInw	FAM107B	family with sequence similarity 107 member B	-0.161049	0.0185589	-3.18767	0.00217194	0.999464	-1.60685
xJag_eq.I5H.3.iLCo	NAA30	N(alpha)-acetyltransferase 30, NatC catalytic subunit	-0.15869	0.0121303	-3.15247	0.00241314	0.999464	-1.68369
NpJIgEC3oVHU53ldIU	COG4	component of oligomeric golgi complex 4	0.140267	0.0303607	3.14448	0.00247124	0.999464	-1.70104
Q5.pTkEgug9Xo4KW0U	RC3H2	ring finger and CCCH-type domains 2	0.122744	-0.0181453	3.13857	0.00251512	0.999464	-1.71387
H10BkpQB2KRdTVQlyg	CARMIL2	capping protein regulator and myosin 1 linker 2	0.17542	0.0132411	3.13229	0.00256246	0.999464	-1.72747
ZOluqaxSe3ndekoNng	FLCN	folliculin	-0.275674	-0.034156	-3.12973	0.00258203	0.999464	-1.73301
3ifA64odx2kCUiR4pc	RNF115	ring finger protein 115	-0.120706	0.00451969	-3.10863	0.00274859	0.999464	-1.77856
r7vwBLWuVF6tROSeko	RGPD1	RANBP2-like and GRIP domain containing 1	-0.420663	-0.0383037	-3.10013	0.00281842	0.999464	-1.79684
QW23.5Gp32kkAcH0HU	ABHD11	abhydrolase domain containing 11	0.172995	0.0329423	3.07963	0.00299384	0.999464	-1.8408
NUl.2l3H1FJH6SnXJ4	TMEM161A	transmembrane protein 161A	-0.234441	0.0293083	-3.07346	0.00304864	0.999464	-1.854
6pu4U2ZKum.5cM9Ka4	HIST1H2AB	histone cluster 1 H2A family member b	0.191097	0.0305498	3.06964	0.00308303	0.999464	-1.86216
xg3S30l5Hj_yXke3x4	AKTIP	AKT interacting protein	-0.10732	0.0482162	-3.05915	0.00317924	0.999464	-1.88452
97UiqveVfuClT16R8g	PKNOX1	PBX/knotted 1 homeobox 1	0.115946	0.0521799	3.05834	0.00318682	0.999464	-1.88625
HW11.V4kX00Uin4KBU	NT5C3B	5'-nucleotidase, cytosolic IIIB	0.0991388	0.00112804	3.04144	0.00334807	0.999464	-1.92215
QwK619cXe67u2ZESfI	RNF7	ring finger protein 7	-0.0995901	-0.00180541	-3.03853	0.00337664	0.999464	-1.92832
oon0If5P1yz97_0vdA	HSPA1A	heat shock protein family A (Hsp70) member 1A	-0.216971	-0.0748352	-3.03451	0.00341639	0.999464	-1.93683
055155VOJ7lC7lSp5M	MT1A	metallothionein 1A	0.211553	0.043647	3.02026	0.00356103	0.999464	-1.96697
ZClHkBfoSHnnorlltg	TNFRSF18	TNF receptor superfamily member 18	-0.257563	-0.00763834	-3.00757	0.00369459	0.999464	-1.99371
cL5QJdeUJ9QJRW_hUI	STAP2	signal transducing adaptor family member 2	-0.215474	0.00731019	-2.98481	0.00394573	0.999464	-2.04145
fkXnESSnsRJI0se9BI	IL12RB2	interleukin 12 receptor subunit beta 2	-0.253148	0.0708896	-2.97138	0.00410137	0.999464	-2.06952
T7Id6hzSCIHhUxe3JU	NUDT16P1	nudix hydrolase 16 pseudogene 1	0.195617	-0.0305208	2.96871	0.00413291	0.999464	-2.07508
BaRT4sTmIV4YUsQnRo	LSM7	LSM7 homolog, U6 small nuclear RNA and mRNA degradation associated	0.0916265	0.0389134	2.96343	0.00419614	0.999464	-2.08609
Wqe0gjFK1E11ToEjgM	PHF6	PHD finger protein 6	-0.197866	0.00581354	-2.95314	0.00432171	0.999464	-2.10747
Hh6pXdf3O10NeXh360	ARHGEF19	Rho guanine nucleotide exchange factor 19	0.170463	0.0187286	2.94353	0.00444231	0.999464	-2.12742
0UJEk_SS9YICJj1VF0	EXO1	exonuclease 1	0.140242	0.0555155	2.92766	0.00464805	0.999464	-2.16022
u_M5UdFdhg3lZ.qe64	UBE2G1	ubiquitin conjugating enzyme E2 G1	0.107172	-0.0544922	2.92007	0.00474959	0.999464	-2.17587
0yeeXXDfXnLqFF9F6o	HAUS4	HAUS augmin like complex subunit 4	0.118708	0.0551477	2.90915	0.00489929	0.999464	-2.19834
3qBhqf9R4KuCE6SXzw	KANSL1L	KAT8 regulatory NSL complex subunit 1 like	0.21935	0.0317313	2.90848	0.00490858	0.999464	-2.19971
3Hcr9x_P.VU7MX9N70	RABGGTB	Rab geranylgeranyltransferase beta subunit	-0.120305	-0.0142387	-2.90804	0.00491477	0.999464	-2.20062
ZNUn_KKV46EFXV6T28	XRCC1	X-ray repair cross complementing 1	0.122799	0.0472385	2.90361	0.00497694	0.999464	-2.20972
iqc4krSIuv5ICEiCNI	ZHX1	zinc fingers and homeoboxes 1	-0.128159	0.0342582	-2.90089	0.00501543	0.999464	-2.21529
Quee3p14FSeyK7u0NU	NA	NA	-0.125257	-0.00867812	-2.89308	0.00512747	0.999464	-2.23128
B6KklUShr84kRDzJ_8	CAPN2	calpain 2	0.223043	0.00288315	2.88505	0.00524522	0.999464	-2.2477
9kY3XkIM1WRNAjoiAg	ARID4A	AT-rich interaction domain 4A	-0.197995	-0.0329597	-2.88386	0.0052628	0.999464	-2.25012
0UUyBURqIiN8we4weY	ZNF222	zinc finger protein 222	-0.214599	-0.0224443	-2.88174	0.00529448	0.999464	-2.25446
NFhtJB9hii9FqilVEc	PKN1	protein kinase N1	0.14355	0.00323906	2.85971	0.0056331	0.999464	-2.29927
EXip4AaIqDqIfjPwkk	YWHAG	tyrosine 3-monooxygenase/tryptophan 5-monooxygenase activation protein gamma	-0.156852	-0.0332851	-2.85937	0.00563839	0.999464	-2.29994
6ooIhor4r.197MJFx4	PRKCA	protein kinase C alpha	-0.242205	-0.00958979	-2.85645	0.00568488	0.999464	-2.30588
6VYPhBUB3UhNFB7VeY	IKZF1	IKAROS family zinc finger 1	-0.180952	0.00820566	-2.8537	0.00572886	0.999464	-2.31144
cVItIoYIop.F_RIeog	JMY	junction mediating and regulatory protein, p53 cofactor	-0.181068	-0.0142246	-2.85222	0.00575267	0.999464	-2.31444
ofkE.J3oLFxRP8iPxY	MPLKIP	M-phase specific PLK1 interacting protein	-0.186455	0.0271812	-2.85076	0.00577621	0.999464	-2.31739
uF4JJC4mp6Ku5KGF70	ISG15	ISG15 ubiquitin-like modifier	0.115441	-0.0161251	2.8477	0.00582607	0.999464	-2.32359
NERV5_oVyczk.zuF_U	GSDME	gasdermin E	0.100967	-0.0283083	2.84291	0.00590458	0.999464	-2.33326
BeSI0N6Kfe.eT3lGIk	IL17D	interleukin 17D	0.215073	0.0416141	2.84023	0.00594911	0.999464	-2.33868
r7pKjb5Hod_m7qCo58	AFG3L2	AFG3 like matrix AAA peptidase subunit 2	0.115517	0.0263113	2.8365	0.00601135	0.999464	-2.3462
0imNKASmBCg2dSKkAU	LSM14B	LSM family member 14B	-0.223872	-0.0255975	-2.82197	0.00625996	0.999464	-2.37544
xlCAyVWRFFe5VI46Pg	PPP1CA	protein phosphatase 1 catalytic subunit alpha	0.13556	0.0290562	2.81739	0.00634028	0.999464	-2.38463
imM9It1UhaS006S.SY	FILIP1L	filamin A interacting protein 1 like	-0.19968	0.0212384	-2.81678	0.00635099	0.999464	-2.38585
uXuUddQlQnoR30gFc4	XRRA1	X-ray radiation resistance associated 1	-0.239984	-0.0487152	-2.81479	0.00638634	0.999464	-2.38985
EXykpF1BRREdXnv9Xk	MKI67	marker of proliferation Ki-67	0.153692	0.0369608	2.81266	0.00642428	0.999464	-2.39412
W6nUq1JUQnk0p3eoig	AGPAT2	1-acylglycerol-3-phosphate O-acyltransferase 2	0.162997	0.0205353	2.80909	0.00648819	0.999464	-2.40126
oUL016nU_reU_ae0_Y	IFI27	interferon alpha inducible protein 27	0.201586	-0.144482	2.80608	0.00654262	0.999464	-2.40728
0tUv1R3gjVBOtckeRE	PADI4	peptidyl arginine deiminase 4	0.299158	0.067293	2.80585	0.00654689	0.999464	-2.40775
ZVeFV6nhQDuf3HuLVw	HYOU1	hypoxia up-regulated 1	0.151528	-0.00445022	2.7989	0.00667433	0.999464	-2.42165
uXnlI7s4OlIN5NCV14	ME2	malic enzyme 2	0.09805	-0.0267961	2.78649	0.00690729	0.999464	-2.44637
ulb4fPU_bd5.Ks6.rY	CGNL1	cingulin like 1	-0.217582	0.0017623	-2.78082	0.00701635	0.999464	-2.45765
NeV6UNKYhl.uJ7i5dc	DIABLO	diablo IAP-binding mitochondrial protein	0.102609	-0.00810219	2.77874	0.00705672	0.999464	-2.46178
H1Ko5d5fZMkR5_KV5Q	NLE1	notchless homolog 1	0.203818	0.0550058	2.77871	0.00705726	0.999464	-2.46184
NTqUQN3ELl5zV3VHVQ	ERF	ETS2 repressor factor	0.138742	0.0118537	2.77153	0.00719827	0.999464	-2.47608
xTdvpfr2nLrOiq55ck	PARP6	poly(ADP-ribose) polymerase family member 6	-0.160566	0.0263934	-2.76494	0.00733007	0.999464	-2.48914
ThTVACguRfol7ondCA	CTNND1	catenin delta 1	-0.199616	0.0243475	-2.74659	0.00770845	0.999464	-2.52534
uAcgyF3WUWJ57tGV0k	POLR1D	RNA polymerase I subunit D	0.0957806	0.0124401	2.74499	0.00774213	0.999464	-2.52847
Km0V6k30X7YXQhMh9Q	CNOT2	CCR4-NOT transcription complex subunit 2	0.0983306	0.00298624	2.74217	0.00780214	0.999464	-2.53403
iglSihwJ4ATV577jIg	SLC30A1	solute carrier family 30 member 1	0.130664	-0.0249111	2.74079	0.00783166	0.999464	-2.53674
fn060RMSkQASTzuhl0	IL23R	interleukin 23 receptor	-0.241052	0.0412541	-2.73851	0.00788072	0.999464	-2.54123
WaqX1dq1ekgIT.FX34	TMEM145	transmembrane protein 145	-0.174811	0.0111849	-2.73405	0.00797711	0.999464	-2.54996
lX9pEnSl__BNIh1Meo	ZNF485	zinc finger protein 485	-0.157791	-0.0226549	-2.73196	0.00802273	0.999464	-2.55406
odF3XHR8CVl4SAUaUQ	IL1B	interleukin 1 beta	-0.28909	0.009726	-2.73127	0.00803799	0.999464	-2.55543
ui7IehIRKnH3i6KJIQ	WDR12	WD repeat domain 12	0.0760888	0.000248575	2.72941	0.00807883	0.999464	-2.55907
WrgvUtBR.8VeA.QjDk	PNPLA8	patatin like phospholipase domain containing 8	-0.226212	-0.0468091	-2.72445	0.00818876	0.999464	-2.56878
ldUuB4OKBOe3Xt_l1U	UQCC1	ubiquinol-cytochrome c reductase complex assembly factor 1	0.119687	-0.014959	2.72266	0.00822871	0.999464	-2.57227
0RjkK6IdY4Q4odooi4	CLUAP1	clusterin associated protein 1	-0.147422	-0.000726497	-2.72196	0.00824458	0.999464	-2.57366
K7j1JRZeFNZT1h5wCY	FCGRT	Fc fragment of IgG receptor and transporter	-0.177502	-0.0376502	-2.72171	0.00825013	0.999464	-2.57414
HhNwLzaqf56hJ36pek	IFI27L1	interferon alpha inducible protein 27 like 1	0.203495	-0.0373411	2.71251	0.00845916	0.999464	-2.59211
uOeuy3MTSP7_cRCNdI	HSD17B11	hydroxysteroid 17-beta dehydrogenase 11	0.187754	0.0184467	2.70407	0.008655	0.999464	-2.60853
9QT_iPusnOt_SfdueQ	SLC35G2	solute carrier family 35 member G2	-0.234857	-0.0530357	-2.69494	0.00887156	0.999464	-2.62626
x5EAUeUjBSKpeoKiCA	GCH1	GTP cyclohydrolase 1	0.234426	-0.00614025	2.69363	0.00890311	0.999464	-2.62881
BeUdB9I5MgI9EemIBU	ZNF844	zinc finger protein 844	0.176913	0.0279768	2.69353	0.00890545	0.999464	-2.629
iOZenBdeOde1RtKTmI	ESR2	estrogen receptor 2	-0.186925	0.0327985	-2.68638	0.00907925	0.999464	-2.64286
QVXt9Aq3H4iMuu.Hnk	TTC30A	tetratricopeptide repeat domain 30A	-0.156708	0.0213992	-2.68033	0.0092285	0.999464	-2.65454
lVMMSqiUfqSikqKrU8	ASNA1	arsA arsenite transporter, ATP-binding, homolog 1 (bacterial)	0.287373	-0.0670171	2.67274	0.00941906	0.999464	-2.66919
KWJd_CU98SOOBSFGlY	BCL11A	B-cell CLL/lymphoma 11A	0.221274	-0.0427372	2.6708	0.00946836	0.999464	-2.67293
WJV5Iu66FE6UVF_q7U	NFATC2IP	nuclear factor of activated T-cells 2 interacting protein	0.237416	-0.0170117	2.66526	0.00961061	0.999464	-2.68361
6fhpkedH3qqV.SKR.w	SLC48A1	solute carrier family 48 member 1	-0.175622	0.0302851	-2.6643	0.00963522	0.999464	-2.68544
N2E5Tx4JKVIEe8Z_UU	CLYBL	citrate lyase beta like	0.16786	-0.0173117	2.66132	0.00971269	0.999464	-2.69118
TYoWYd0HWC0JWR3jxc	NUP93	nucleoporin 93	0.101359	0.0210664	2.65098	0.00998553	0.999464	-2.71101
0Us8a5d93lV.VKs3uo	CLCF1	cardiotrophin like cytokine factor 1	-0.15092	-0.0563964	-2.64885	0.0100426	0.999464	-2.71508
W.knji5z0AKCrN6CWk	GPD2	glycerol-3-phosphate dehydrogenase 2	-0.164901	0.00431516	-2.64611	0.0101165	0.999464	-2.72033
xrlPVJvy.cil0v3U0k	MTHFR	methylenetetrahydrofolate reductase	-0.172178	-0.0128197	-2.64275	0.0102079	0.999464	-2.72677
TN4l1ZIoOSDhlGkZKM	HHLA3	HERV-H LTR-associating 3	0.140654	0.00497422	2.64153	0.0102411	0.999464	-2.72909
H30XXrlc1ZAOp9eXr8	ITK	IL2 inducible T-cell kinase	-0.159091	0.0185663	-2.63903	0.0103098	0.999464	-2.73387
feiVLO57uLyC09_eII	OPTN	optineurin	-0.103308	0.00289611	-2.63844	0.0103259	0.999464	-2.73499
W_IgEDij7Av6ofF3sk	SELENOT	selenoprotein T	0.261157	0.00886551	2.63667	0.0103749	0.999464	-2.73837
opRGSKIDrfOrrieLHg	SIRT5	sirtuin 5	0.0999818	0.00153547	2.63332	0.0104679	0.999464	-2.74476
xe8O2RSAOSkdJCgqUU	E2F8	E2F transcription factor 8	0.151037	0.0812953	2.63278	0.010483	0.999464	-2.74578
uJK0inXB6kHQj3p9x4	EIF3E	eukaryotic translation initiation factor 3 subunit E	-0.077217	0.00741801	-2.63082	0.010538	0.999464	-2.74953
KiTsYpy5E71n.jjqFI	ARSK	arylsulfatase family member K	-0.155649	0.0237904	-2.62439	0.0107198	0.999464	-2.76176
H3lUpXHFT71fXfXlfg	PLD2	phospholipase D2	-0.194719	0.00156329	-2.62356	0.0107436	0.999464	-2.76334
utCg_HgYHCJ16OrWoE	ACSF2	acyl-CoA synthetase family member 2	0.126969	0.00647933	2.62298	0.0107602	0.999464	-2.76444
N_XLnEBfXuodLt9KQ4	C3orf52	chromosome 3 open reading frame 52	-0.255826	0.0212033	-2.62141	0.0108052	0.999464	-2.76743
3DSp5kfV7Ua1UpfXt8	SCLY	selenocysteine lyase	0.132215	-0.0323848	2.62032	0.0108364	0.999464	-2.76949
TiHquTdSJR0RXQXb9c	ZSWIM4	zinc finger SWIM-type containing 4	-0.110477	0.013322	-2.61486	0.0109947	0.999464	-2.77985
06TJxbi90koH1SY4w4	ALDH5A1	aldehyde dehydrogenase 5 family member A1	0.115199	0.0616557	2.61407	0.0110177	0.999464	-2.78134
QeyHPdCs8HZIV3qrKo	DLG5	discs large MAGUK scaffold protein 5	-0.246475	0.0628496	-2.61363	0.0110305	0.999464	-2.78217
ZenwHontUmDShnS0d4	TRIM7	tripartite motif containing 7	0.216496	0.0412347	2.61255	0.0110622	0.999464	-2.78422
u1Xwj6ggoQo70dpHH0	MALT1	MALT1 paracaspase	-0.111985	0.0112974	-2.60967	0.0111471	0.999464	-2.78968
omuSdql59eiOKGetic	AQP12B	aquaporin 12B	-0.18345	0.00744244	-2.60535	0.0112754	0.999464	-2.79785
QjnUDNORA4kqWa6i6k	NUTF2	nuclear transport factor 2	0.118592	0.00548606	2.60442	0.011303	0.999464	-2.7996
WtUSYleiehCBIlMgHk	CENPP	centromere protein P	0.121919	-0.00165188	2.60317	0.0113405	0.999464	-2.80196
f1LXRBe19Fy1deFSo4	PPP2R5A	protein phosphatase 2 regulatory subunit B'alpha	0.0961736	0.0348083	2.60127	0.0113977	0.999464	-2.80555
6kt_fEKKrxTs0RcN9U	ABCD3	ATP binding cassette subfamily D member 3	-0.117197	0.00497034	-2.60086	0.0114099	0.999464	-2.80632
6iq_of.H0cogfsEU6o	BBS9	Bardet-Biedl syndrome 9	-0.320131	0.034845	-2.59757	0.0115097	0.999464	-2.81253
ruh5533FDVJYIOdW8U	LOC728024	chromosome X open reading frame 56 pseudogene	-0.173871	0.0102846	-2.59741	0.0115146	0.999464	-2.81283
WXVxXl7fe_Oefr_0qc	TMEM217	transmembrane protein 217	-0.179102	0.0970464	-2.59502	0.0115874	0.999464	-2.81733
953elfp1__quqHEjiM	SCARNA12	small Cajal body-specific RNA 12	0.19563	0.0121656	2.59377	0.0116259	0.999464	-2.8197
6iroOju.pnk6jeuVd8	LAPTM4B	lysosomal protein transmembrane 4 beta	0.123068	-0.0232403	2.58775	0.0118118	0.999464	-2.83102
fwi.iBJelBIaiUf9Uk	ZNF28	zinc finger protein 28	-0.167468	0.0345061	-2.58399	0.0119296	0.999464	-2.83809
cnEBCdN.oHpHefntSU	YME1L1	YME1 like 1 ATPase	0.156535	0.0186335	2.58332	0.0119506	0.999464	-2.83935
E4UINIJUKrE.Pn8N5E	PHF3	PHD finger protein 3	-0.137525	-0.0647602	-2.58246	0.0119776	0.999464	-2.84096
coh750FNKAS_0ghNPo	GTF2H1	general transcription factor IIH subunit 1	-0.15487	0.0131071	-2.57451	0.0122308	0.999464	-2.85587
ouCelRFzQJVedx7heg	CENPM	centromere protein M	0.135947	0.023688	2.57246	0.0122968	0.999464	-2.8597
012RuCR9VN5N9oR1Ck	PACS2	phosphofurin acidic cluster sorting protein 2	0.207431	0.0265155	2.5691	0.0124057	0.999464	-2.86599
WnupdNfR0vuAwFnX5U	ARL2	ADP ribosylation factor like GTPase 2	0.0952235	0.00101087	2.56093	0.012674	0.999464	-2.88123
Qw2SUajq2K4Sn0qFEc	GMPR2	guanosine monophosphate reductase 2	-0.202746	0.00477813	-2.55496	0.0128739	0.999464	-2.89237
uCCrLAByI_qUpkunRk	RHBDL2	rhomboid like 2	-0.190898	-0.0147268	-2.55484	0.0128779	0.999464	-2.89259
rnnifqiSBSieMIhX9o	NOP9	NOP9 nucleolar protein	0.18747	0.00625758	2.55281	0.0129461	0.999464	-2.89635
fhJC1FcH7xEkTFEr3o	DCAF12	DDB1 and CUL4 associated factor 12	-0.0749084	-0.0260852	-2.54499	0.0132132	0.999464	-2.91088
oZAURF5QokEg19Shb0	NR2C2	nuclear receptor subfamily 2 group C member 2	-0.132154	-0.0233179	-2.54066	0.0133631	0.999464	-2.91891
9SC7oqqdeHIQ.VyV_4	NRK	Nik related kinase	-0.206517	-0.00889906	-2.54039	0.0133727	0.999464	-2.91942
E107BPrgo1KDOEQK6A	EIF4E	eukaryotic translation initiation factor 4E	-0.176331	-0.028381	-2.54026	0.0133771	0.999464	-2.91965
f.DpMKH5PPk8qJq054	VAMP4	vesicle associated membrane protein 4	-0.106372	-0.00827955	-2.53716	0.0134855	0.999464	-2.9254
H7cE1AHir6gCh9XXss	CYTIP	cytohesin 1 interacting protein	-0.156797	0.0473383	-2.53336	0.0136195	0.999464	-2.93243
6JASaRjql.fNYiLiJk	GRB2	growth factor receptor bound protein 2	-0.147272	-0.0365666	-2.53237	0.0136549	0.999464	-2.93427
cft9chVEi8AfqPVelU	R3HDM2	R3H domain containing 2	-0.158598	-0.000557723	-2.53143	0.0136881	0.999464	-2.936
Ko6Z6_kSN8BOiV_0js	GLE1	GLE1, RNA export mediator	0.106925	0.0191636	2.5292	0.0137678	0.999464	-2.94013
fod7SAqdHjfdyiet7o	SLFN12	schlafen family member 12	0.123778	0.019112	2.52609	0.0138791	0.999464	-2.94585
KXuYrnnrLhQoroogqQ	JOSD2	Josephin domain containing 2	0.152712	0.00263964	2.52502	0.0139178	0.999464	-2.94783
HVJx_IjhioI0fiVKLw	TNFAIP8L1	TNF alpha induced protein 8 like 1	-0.198229	0.0347035	-2.52454	0.0139351	0.999464	-2.94871
o9cnRMlQCrmKiK6PFI	FERMT2	fermitin family member 2	-0.175475	0.0128085	-2.52443	0.0139394	0.999464	-2.94893
6TheVd.HiE1UF3lX6g	AAAS	aladin WD repeat nucleoporin	0.142675	-0.0218925	2.52092	0.0140666	0.999464	-2.95539
ECCG5e.VfZfeW4_0v0	PMS2P4	PMS1 homolog 2, mismatch repair system component pseudogene 4	0.103235	0.0478716	2.5199	0.0141039	0.999464	-2.95727
9niJ6n9d7hTVpewTN4	GAS6	growth arrest specific 6	0.201905	-0.076738	2.5169	0.0142141	0.999464	-2.9628
iaGe9wAK3Xkje3qe44	SGK1	serum/glucocorticoid regulated kinase 1	-0.158095	-0.088188	-2.51653	0.0142276	0.999464	-2.96347
6XRyEiidQF5U3TVORY	NA	NA	0.117522	0.0164776	2.51572	0.0142576	0.999464	-2.96496
Wk7h8kKneA4QIgYkUQ	ZWILCH	zwilch kinetochore protein	-0.140921	0.0193425	-2.51463	0.0142977	0.999464	-2.96696
6ld8g7V3fqH58jjqM4	PLS3	plastin 3	0.141337	0.0380429	2.51413	0.0143163	0.999464	-2.96788
fU_.EieJPrhKt4TrS0	GRM3	glutamate metabotropic receptor 3	0.180354	0.0583252	2.51195	0.0143971	0.999464	-2.97188
Tiuh76h0KH_ee.1ztM	HSPA1B	heat shock protein family A (Hsp70) member 1B	-0.178561	-0.0802281	-2.51065	0.0144456	0.999464	-2.97427
Bc6IklhFV3xJbo79eg	P2RY8	P2Y receptor family member 8	0.0901326	0.037816	2.50973	0.0144802	0.999464	-2.97597
xsk3bRlJHZdXFDh0Xg	BCAT2	branched chain amino acid transaminase 2	0.100183	-0.00356976	2.50584	0.0146262	0.999464	-2.98309
cKnPP14Ho7VwCQMB5U	STARD4	StAR related lipid transfer domain containing 4	-0.210239	0.025744	-2.50465	0.0146714	0.999464	-2.98528
3aVeAhBJ1f3n2hFHQE	RMI2	RecQ mediated genome instability 2	0.108163	0.0491648	2.50433	0.0146836	0.999464	-2.98587
ivBIUrop0qIgj2I.os	PPFIBP1	PPFIA binding protein 1	-0.173714	0.00483794	-2.50317	0.0147276	0.999464	-2.98799
BodPXl_iAMfQUiSol4	RASGRP2	RAS guanyl releasing protein 2	0.22365	-0.0626637	2.50306	0.0147317	0.999464	-2.98819
Ng8fIJIqqXqIV6ofS4	ARNTL2	aryl hydrocarbon receptor nuclear translocator like 2	-0.202904	-0.0109198	-2.50144	0.0147932	0.999464	-2.99115
iC1DNjleeJZ_iSNnmg	RALY	RALY heterogeneous nuclear ribonucleoprotein	0.138626	0.0411627	2.50096	0.0148116	0.999464	-2.99203
odS7F6Sa56DN4aWI3w	HIST1H2AE	histone cluster 1 H2A family member e	0.182251	0.062405	2.49936	0.0148731	0.999464	-2.99497
9KcIjuHEl5V4e77VKk	CTSK	cathepsin K	-0.218866	-0.00972329	-2.49766	0.0149384	0.999464	-2.99808
0k3LjKLLuiYgukgRck	BACH1	BTB domain and CNC homolog 1	-0.175566	-0.00789599	-2.49457	0.0150575	0.999464	-3.00371
3S0BfnysiCiRwMnHUg	HNRNPH2	heterogeneous nuclear ribonucleoprotein H2	-0.172385	0.0532275	-2.48817	0.0153075	0.999464	-3.01539
BIkCRNSiVS_0eS3qQU	SMG7	SMG7, nonsense mediated mRNA decay factor	0.133011	-0.0461826	2.48785	0.0153204	0.999464	-3.01599
lgVm5Be1YdyWXfSRlM	MT2A	metallothionein 2A	0.190913	0.0490301	2.48233	0.0155391	0.999464	-3.02603
0nXudzVXdK2.oy44Eg	VIRMA	vir like m6A methyltransferase associated	0.13038	-0.00538545	2.48052	0.0156115	0.999464	-3.02933
NJHXLd6XujUuc97RQU	MYO5C	myosin VC	0.147541	0.0728061	2.4799	0.015636	0.999464	-3.03044
xUZ0v6FPooHy7RkQOo	CIAPIN1	cytokine induced apoptosis inhibitor 1	0.103534	-0.00527212	2.47934	0.0156585	0.999464	-3.03146
WUcRfeqeh_.SSf6_R4	ZNF689	zinc finger protein 689	-0.128864	0.0330428	-2.47799	0.0157128	0.999464	-3.03391
ZSdOqCUTITV.fV_RnY	DPF2	double PHD fingers 2	0.0761725	0.0279171	2.47607	0.0157903	0.999464	-3.0374
NawJcR29S0Xx2U4CC0	ZNF669	zinc finger protein 669	-0.149835	-0.0227705	-2.47528	0.0158223	0.999464	-3.03884
WnqILjwqLgFJUe4ghQ	CRYM	crystallin mu	-0.210878	-0.0178794	-2.47487	0.0158393	0.999464	-3.03959
rojT1S4VferlBx4ooM	EFL1	elongation factor like GTPase 1	0.112589	0.0042802	2.46925	0.0160686	0.999464	-3.04977
EuYXY3tUJPTvV0Unss	LRCH3	leucine rich repeats and calponin homology domain containing 3	-0.160363	0.0157773	-2.46903	0.0160775	0.999464	-3.05017
fnf3SSBAovR6fJxLhk	IQCG	IQ motif containing G	0.197141	0.00794567	2.46676	0.0161711	0.999464	-3.05428
f5OhpkpWUh8KhetFGc	TYMP	thymidine phosphorylase	0.242236	-0.0185382	2.46412	0.0162807	0.999464	-3.05906
BSEehRSIv4onCNOyIs	METTL6	methyltransferase like 6	-0.134452	0.0250088	-2.46132	0.0163975	0.999464	-3.06412
Nh7uCW.u63U7K57vVo	KIAA0355	KIAA0355	-0.11095	0.0291909	-2.46054	0.0164303	0.999464	-3.06554
iroEcQAplTfRSYkaog	NCK2	NCK adaptor protein 2	-0.186047	0.0104583	-2.45978	0.0164623	0.999464	-3.06691
QKHsvJqjjvC7pQmRpo	EMX2	empty spiracles homeobox 2	0.190853	0.0469852	2.45939	0.0164786	0.999464	-3.06761
Hj7olL1C5SPIkqc5JU	ELF2	E74 like ETS transcription factor 2	-0.223323	-0.0471808	-2.4576	0.0165538	0.999464	-3.07084
Bl74eepWPeM4vK4U4g	NSD2	nuclear receptor binding SET domain protein 2	0.176359	0.0160353	2.45402	0.0167058	0.999464	-3.0773
cUHqXO4CGXlo5ILOCE	GPM6A	glycoprotein M6A	0.236854	-0.00932662	2.45061	0.0168515	0.999464	-3.08345
rN4x5qeKl6Uen3kqO4	ELP6	elongator acetyltransferase complex subunit 6	0.106514	0.0295369	2.44993	0.0168806	0.999464	-3.08467
c_GGiCNf6OSIlJCimk	DNAJC3	DnaJ heat shock protein family (Hsp40) member C3	-0.119047	-0.0974619	-2.447	0.0170069	0.999464	-3.08994
6kUIH1PcNyJ4Uv4nj0	MSMO1	methylsterol monooxygenase 1	-0.102397	0.000353711	-2.44455	0.0171131	0.999464	-3.09434
xHn.Lh2KUpLTmX3q3U	CCDC127	coiled-coil domain containing 127	0.0983228	0.0121812	2.44193	0.0172275	0.999464	-3.09905
9I08oQsukUlqIIWTuU	FAM98B	family with sequence similarity 98 member B	-0.199563	0.0115118	-2.44063	0.0172843	0.999464	-3.10138
lkTEtUuVJEWgv7Mel0	AMMECR1	Alport syndrome, mental retardation, midface hypoplasia and elliptocytosis chromosomal region gene 1	0.156214	-0.0164232	2.44035	0.0172967	0.999464	-3.10188
NICr.zoUOVS_0tIlvo	SGK1	serum/glucocorticoid regulated kinase 1	-0.158553	-0.11567	-2.44021	0.0173028	0.999464	-3.10213
HdIaisXqLRLrUIXZJc	ARMC10	armadillo repeat containing 10	-0.121449	0.0096629	-2.43708	0.0174407	0.999464	-3.10775
TJsl33X8UI6aftXv2U	HDLBP	high density lipoprotein binding protein	-0.197155	0.0684175	-2.43545	0.0175133	0.999464	-3.11068
Tr_TUleITsoBF.SFSk	DDX42	DEAD-box helicase 42	0.0681019	0.0161352	2.43461	0.0175506	0.999464	-3.11218
iLk9fVfVLUwAVaFUl0	ZNF155	zinc finger protein 155	0.200141	-0.0111096	2.43354	0.0175983	0.999464	-3.1141
BVCReghOUjU7ksOXro	RPL28	ribosomal protein L28	-0.0960416	0.0263362	-2.43245	0.0176469	0.999464	-3.11605
ZILHe8Op0iO_qMCzHs	FAM174A	family with sequence similarity 174 member A	-0.200771	-0.0244148	-2.43142	0.0176929	0.999464	-3.11789
KWXpZVpWW4VGll1olY	KLHL5	kelch like family member 5	0.198659	0.00804486	2.43123	0.0177014	0.999464	-3.11823
BFEt1qiE9P9I4ISp_I	PPP4R1L	protein phosphatase 4 regulatory subunit 1 like (pseudogene)	-0.19791	0.0476	-2.42857	0.0178211	0.999464	-3.12299
rjl96N8JS_0uitdKnk	PRRX1	paired related homeobox 1	-0.189083	-0.00239764	-2.42768	0.0178611	0.999464	-3.12457
HXC4QR6gDoLHqryAYo	AIM2	absent in melanoma 2	-0.216611	0.00533713	-2.42495	0.0179851	0.999464	-3.12946
Qn_78f.p6JojiqUVbk	MTA1	metastasis associated 1	-0.0820805	0.008544	-2.4246	0.018001	0.999464	-3.13008
QdqpwA7WUX0_kEkaU0	TUBB4B	tubulin beta 4B class IVb	0.120567	0.027062	2.42124	0.0181546	0.999464	-3.13608
cq6SRE2tRXn7UgHvCI	UBE2D2	ubiquitin conjugating enzyme E2 D2	-0.153632	-0.015041	-2.41539	0.0184245	0.999464	-3.1465
fn_7AxLo3Q32q7jgyY	HK2	hexokinase 2	-0.163587	-0.00797612	-2.41475	0.0184543	0.999464	-3.14764
QckkeqEoOHrV_KK24Q	TEDC1	tubulin epsilon and delta complex 1	0.117548	0.0368434	2.41221	0.0185729	0.999464	-3.15216
lOFICqUWq3DrhLUBR0	PXN	paxillin	-0.189223	0.00281952	-2.4115	0.0186062	0.999464	-3.15342
fLV5PmZhWmmoSn559c	MGST1	microsomal glutathione S-transferase 1	0.138631	0.0213486	2.40835	0.0187545	0.999464	-3.15902
9gjnHf10XnvtOXFOpY	ALDH6A1	aldehyde dehydrogenase 6 family member A1	0.100677	0.0136148	2.4083	0.0187568	0.999464	-3.15911
oVFD92hH3S7ugnTupU	MUC1	mucin 1, cell surface associated	0.245244	-4.81181e-05	2.40772	0.018784	0.999464	-3.16013
61fbvFdezA1Bd6tb3Y	HOXC6	homeobox C6	-0.17207	-0.0170807	-2.40759	0.0187902	0.999464	-3.16036
l5cXJ5NzDtJ81wp7UY	MAPK6	mitogen-activated protein kinase 6	-0.0691231	-0.00526579	-2.40684	0.0188258	0.999464	-3.1617
ZJx7jlN91VNV93qqVE	SIPA1L3	signal induced proliferation associated 1 like 3	-0.171835	0.0486673	-2.40414	0.0189539	0.999464	-3.16648
orciW4.QnP9eA59Kj0	NUDCD1	NudC domain containing 1	-0.168878	-0.00253432	-2.40353	0.0189829	0.999464	-3.16756
0k7Im15X_A0h6u7t9U	VOPP1	VOPP1, WBP1/VOPP1 family member	0.127056	0.0254416	2.40166	0.0190727	0.999464	-3.17088
l6KU4uK4CXjv.VpS74	VPS33B	VPS33B, late endosome and lysosome associated	0.0820785	-0.0106809	2.4005	0.0191281	0.999464	-3.17293
K8VQgl6r1OXpI6UgIE	MREG	melanoregulin	-0.121905	0.00287089	-2.39971	0.0191662	0.999464	-3.17433
TBZcYhHQrd0pJ5In0E	DNAJC25-GNG10	DNAJC25-GNG10 readthrough	-0.208648	0.0253653	-2.39903	0.019199	0.999464	-3.17554
oOKaeeSVCBuOu1EpYg	TUBG1	tubulin gamma 1	0.12471	-0.0143231	2.39552	0.0193691	0.999464	-3.18175
rPYriqtCaIp2i2iAns	UBL5	ubiquitin like 5	0.122441	-0.0113758	2.39472	0.019408	0.999464	-3.18317
6zEfenRKAu3ksqhUi0	RHOC	ras homolog family member C	-0.0836832	-0.00576627	-2.3931	0.0194869	0.999464	-3.18603
3XUgRPeAarjLgkPlzk	ST7L	suppression of tumorigenicity 7 like	-0.170441	-0.0105308	-2.39295	0.0194943	0.999464	-3.18629
EghEiHbF5nv7llnl3o	STIP1	stress induced phosphoprotein 1	0.12125	0.0212764	2.3927	0.0195063	0.999464	-3.18673
ifw9_pdQwu1TK7elKU	PVRIG	PVR related immunoglobulin domain containing	0.0965403	-0.00140405	2.3926	0.0195115	0.999464	-3.18691
ZkEjUBB9gpA7rpujkA	VAMP4	vesicle associated membrane protein 4	-0.130896	-0.0201513	-2.39043	0.0196177	0.999464	-3.19074
fX7oznu4Ftu4u6zl40	SGK1	serum/glucocorticoid regulated kinase 1	-0.135119	-0.095398	-2.39041	0.0196188	0.999464	-3.19078
uF_JShglCEG4dULJKI	PAG1	phosphoprotein membrane anchor with glycosphingolipid microdomains 1	-0.135433	-0.000250839	-2.38844	0.0197157	0.999464	-3.19425
WeOWarqp5ewOEe4MBU	CTU1	cytosolic thiouridylase subunit 1	-0.167785	0.0515172	-2.38589	0.0198418	0.999464	-3.19874
o.pLollLfrl7p92zpw	TRO	trophinin	0.129389	-0.00407017	2.38386	0.0199431	0.999464	-3.20233
l7afEnfWi3Il7673tU	COBLL1	cordon-bleu WH2 repeat protein like 1	-0.231906	0.0859289	-2.3831	0.0199807	0.999464	-3.20365
QRLqiToqOr_l7n3nz0	TCL1B	T-cell leukemia/lymphoma 1B	0.200756	0.00337198	2.38263	0.0200044	0.999464	-3.20449
fhVf8JS4nqfS.9UpTk	SNX27	sorting nexin family member 27	-0.0885048	0.0201467	-2.38175	0.0200482	0.999464	-3.20603
BiJI_e9VkOODqRr_lg	DYNC1I2	dynein cytoplasmic 1 intermediate chain 2	0.0806447	0.0050804	2.37905	0.0201843	0.999464	-3.21079
BeO7_iQ6CK5f4Bequo	HACE1	HECT domain and ankyrin repeat containing E3 ubiquitin protein ligase 1	0.167295	0.0248605	2.37808	0.020233	0.999464	-3.21248
QQtwGQicj4llPgh19U	AIG1	androgen induced 1	0.100743	-0.0138938	2.37664	0.0203058	0.999464	-3.21501
ufXxQuB1OlUCRSODvs	MERTK	MER proto-oncogene, tyrosine kinase	0.184936	0.0246648	2.37654	0.0203111	0.999464	-3.2152
ZnT7.1fzxEoSUqiiqo	SREBF2	sterol regulatory element binding transcription factor 2	0.216451	-0.000534492	2.37524	0.0203771	0.999464	-3.21748
WcpQXgJTp453JTSvf0	UBE2D2	ubiquitin conjugating enzyme E2 D2	0.132145	0.0175301	2.37363	0.0204592	0.999464	-3.22031
rGk_igqEnn6vcOded0	ATXN2L	ataxin 2 like	0.156748	0.0519058	2.37166	0.0205595	0.999464	-3.22375
i0CH1eKKGFUUHp5vnE	NCF4	neutrophil cytosolic factor 4	0.132149	-0.0451746	2.37051	0.0206188	0.999464	-3.22577
TNtVNtdftXh_qR9RXg	LIF	LIF, interleukin 6 family cytokine	0.187681	0.00743203	2.3693	0.020681	0.999464	-3.22789
Q77eIrigUCopBwJqAU	PPM1K	protein phosphatase, Mg2+/Mn2+ dependent 1K	0.231933	0.0260094	2.36864	0.020715	0.999464	-3.22905
ZHdUeJCbe61zrNBSzc	ARHGAP24	Rho GTPase activating protein 24	-0.225152	0.0333823	-2.36862	0.020716	0.999464	-3.22908
9VKiAI1OKE._E0yFqI	TUBG1	tubulin gamma 1	0.211765	0.0390687	2.36686	0.0208074	0.999464	-3.23218
c7t3l_38ih9JtQh6pU	PLLP	plasmolipin	0.183807	0.0230449	2.36488	0.0209097	0.999464	-3.23563
95TfnP9P9Xugjk6_TU	IMPAD1	inositol monophosphatase domain containing 1	-0.127155	-0.0203872	-2.36056	0.0211355	0.999464	-3.24318
fXQoRQDRu4ogjrtDpU	ASTN2	astrotactin 2	-0.193095	-0.0371787	-2.36038	0.0211453	0.999464	-3.24351
Wb5ZJrqCgKSOwOO768	NCOR2	nuclear receptor corepressor 2	-0.0998734	-0.00503192	-2.35995	0.0211679	0.999464	-3.24426
ZkINSxfkTILJBU1flw	PPP1R3C	protein phosphatase 1 regulatory subunit 3C	0.258292	0.0243923	2.35986	0.0211725	0.999464	-3.24441
QjkdF2l1QLnqPEpuJQ	TRIM16L	tripartite motif containing 16 like	0.341808	0.0372124	2.35901	0.0212172	0.999464	-3.24589
Nb5O.qOunXvt_Z3qC0	STX1A	syntaxin 1A	0.162783	-0.0144548	2.35745	0.0212997	0.999464	-3.24862
faItNLz3dd5XVMUULU	ZNF470	zinc finger protein 470	-0.165779	-0.0198746	-2.35739	0.0213031	0.999464	-3.24873
uxxktPfRxdl4tsXXU4	MRPL39	mitochondrial ribosomal protein L39	-0.218824	0.0118334	-2.35684	0.0213321	0.999464	-3.24969
W36eilK6EF7TR4feAI	FBXO22	F-box protein 22	-0.10198	0.0405227	-2.35652	0.0213487	0.999464	-3.25024
EMkr3rjrEQgs3AXfX0	SLTM	SAFB like transcription modulator	-0.195538	0.00592483	-2.35621	0.0213651	0.999464	-3.25077
THp8GLRJdJ7nqGFft0	SDC4	syndecan 4	-0.170202	-0.0120058	-2.35584	0.0213852	0.999464	-3.25144
3l1Hl3oPnQvT44V3hU	BAX	BCL2 associated X, apoptosis regulator	0.118807	0.0144321	2.35475	0.021443	0.999464	-3.25333
NX7vQT0lJVJTrcY8c4	LOC728715	ovostatin homolog 2	0.14118	-0.0305609	2.35422	0.021471	0.999464	-3.25425
fa6RI64H79KC7iRqXo	WDR4	WD repeat domain 4	0.185716	0.0399538	2.35193	0.0215933	0.999464	-3.25824
xp.pD390lxFdH77o04	ATAD2	ATPase family, AAA domain containing 2	0.114253	0.0130201	2.3506	0.0216648	0.999464	-3.26056
o1UcwS_eWWgsSFIJV4	SCNM1	sodium channel modifier 1	0.0811035	0.038046	2.34946	0.0217261	0.999464	-3.26254
xKf56fuaTXnW3kr7n0	ATP5I	ATP synthase, H+ transporting, mitochondrial Fo complex subunit E	-0.0842213	0.0337729	-2.34746	0.021834	0.999464	-3.26602
NXwliuqozqj0pD78RE	STIM2	stromal interaction molecule 2	-0.146344	-0.0174281	-2.34537	0.0219472	0.999464	-3.26965
ERLUpQAhKpAldEJSgo	PROCA1	protein interacting with cyclin A1	0.16516	0.0403639	2.3438	0.0220325	0.999464	-3.27238
6fr4ZX0kR8ecd7FVJU	LY6G5C	lymphocyte antigen 6 family member G5C	0.216611	0.047977	2.34168	0.0221483	0.999464	-3.27606
xpCIQrn0DPU0rL7i5E	BCLAF3	BCLAF1 and THRAP3 family member 3	0.165468	-0.0318413	2.34121	0.0221744	0.999464	-3.27689
BK3v6RVHnhSXVIgLuQ	HSD17B10	hydroxysteroid 17-beta dehydrogenase 10	0.118053	0.0274387	2.34084	0.0221944	0.999464	-3.27752
0mdQzboXnv7QIfpfbo	CNNM2	cyclin and CBS domain divalent metal cation transport mediator 2	-0.155817	-0.0490248	-2.33905	0.0222928	0.999464	-3.28062
uEJ6JKUGOGZkX3E02I	TRAPPC5	trafficking protein particle complex 5	0.0691977	-0.00359277	2.33613	0.0224542	0.999464	-3.28569
rnkFXTzUUZEjrEnqng	TICAM1	toll like receptor adaptor molecule 1	0.1426	0.00448032	2.33581	0.0224722	0.999464	-3.28625
9GdZrvqj.ceTdhJN2o	LBR	lamin B receptor	0.197461	-0.0277539	2.33537	0.0224961	0.999464	-3.28699
Wh6ZKQiR00IyO4EAVo	TADA2A	transcriptional adaptor 2A	0.116406	0.0240415	2.33421	0.0225607	0.999464	-3.28901
Bl1ZGRZkl57lbq1Yuc	SPG21	SPG21, maspardin	0.131988	0.0460035	2.33259	0.022651	0.999464	-3.29181
fIoOHk4NxeL56T6ilI	IMMP2L	inner mitochondrial membrane peptidase subunit 2	0.103708	-0.00763495	2.33168	0.0227024	0.999464	-3.2934
lgq1V54eiJ6gzpP6Ec	FBXO32	F-box protein 32	-0.162878	-0.0347165	-2.3303	0.0227796	0.999464	-3.29578
QGOF966I4gH02f1KVE	ERCC6	ERCC excision repair 6, chromatin remodeling factor	-0.144788	0.032551	-2.33014	0.0227886	0.999464	-3.29606
Zop4h2p4v5oitLBwPo	TPM1	tropomyosin 1	-0.158084	0.0674255	-2.32859	0.0228757	0.999464	-3.29873
rshPVZ9UdQLWUIJs1Y	RMRP	RNA component of mitochondrial RNA processing endoribonuclease	0.189854	0.0326767	2.32816	0.0229	0.999464	-3.29947
0pKUnb.3d4N6evyiiU	CWC25	CWC25 spliceosome associated protein homolog	-0.104726	0.0302165	-2.32796	0.0229111	0.999464	-3.29982
iSSAoAoqt4gkmFQol0	LENG1	leukocyte receptor cluster member 1	0.145185	-0.042255	2.32765	0.022929	0.999464	-3.30036
K76IhCgIo4VQ4oeu5I	TRIM24	tripartite motif containing 24	-0.130603	-0.0216826	-2.32225	0.0232352	0.999464	-3.30966
Z0EKEefiCOoqCUIVLo	CREB3L4	cAMP responsive element binding protein 3 like 4	0.203322	0.0703487	2.3219	0.0232554	0.999464	-3.31027
uk9YN7ipUASD8qurgI	RSF1	remodeling and spacing factor 1	-0.162325	-0.066772	-2.31977	0.0233776	0.999464	-3.31394
9eh8FGDFfi7UD6goH4	AQR	aquarius intron-binding spliceosomal factor	-0.169793	-0.0185735	-2.31431	0.023693	0.999464	-3.32333
fRKs3KKpqghOjLMoIQ	HMGXB4	HMG-box containing 4	-0.257296	-6.67668e-05	-2.31052	0.0239145	0.999464	-3.32985
xV6LUhxH0g9KSd9F3o	TTC39B	tetratricopeptide repeat domain 39B	0.127106	0.0158543	2.31003	0.0239431	0.999464	-3.33069
34Kf76KoSJEoEl_Et4	ELMSAN1	ELM2 and Myb/SANT domain containing 1	-0.102645	-0.0206736	-2.31001	0.0239443	0.999464	-3.33072
QiuS1UlVFXSt7vH6.8	C20orf27	chromosome 20 open reading frame 27	0.0960461	0.0299849	2.30994	0.0239484	0.999464	-3.33084
KVcFKlKJIe1Tsees3g	FBXO38	F-box protein 38	0.16723	0.0517174	2.30883	0.0240137	0.999464	-3.33275
ZSn0AUvS7NamGrLrrk	LARP4B	La ribonucleoprotein domain family member 4B	-0.091799	-0.0167917	-2.30745	0.0240947	0.999464	-3.33511
0k6v.eSfPuDF_ve9DI	RIF1	replication timing regulatory factor 1	0.0861465	-0.0109534	2.30179	0.0244311	0.999464	-3.34481
xEc16kDv8V7XUl1efU	MPDU1	mannose-P-dolichol utilization defect 1	0.139812	-0.027904	2.30084	0.0244881	0.999464	-3.34644
KYI6SeeKKJYJUAJ4K4	ADK	adenosine kinase	0.151691	0.0434875	2.29989	0.024545	0.999464	-3.34807
c7pNH5EfP_yA6sP7lY	RBBP6	RB binding protein 6, ubiquitin ligase	0.17724	0.0373957	2.2984	0.024634	0.999464	-3.3506
3VXrR0jrIAOn4WcWEg	ZRANB1	zinc finger RANBP2-type containing 1	-0.122397	-0.0132085	-2.2963	0.0247608	0.999464	-3.35419
9Gea4jsksNJ1SYbuyc	RREB1	ras responsive element binding protein 1	0.139378	-0.044572	2.29071	0.0251009	0.999464	-3.36373
iXSU6IU7Tkg8EKyRYk	PANX2	pannexin 2	-0.206163	0.0665216	-2.2883	0.0252487	0.999464	-3.36783
6S5_kXoLK6SO8GV9dU	TPP1	tripeptidyl peptidase 1	0.0842812	-0.0317251	2.28816	0.0252577	0.999464	-3.36808
oD3yl.3Qkqj0Uf3yXU	NA	NA	0.227474	0.0355985	2.28505	0.0254492	0.999464	-3.37336
iZLD3TtVMJIntEu5HE	TBPL1	TATA-box binding protein like 1	-0.0732869	-0.00235736	-2.28314	0.0255678	0.999464	-3.37661
fgB4n1rRIgbkhj1VlM	BABAM1	BRISC and BRCA1 A complex member 1	0.105139	0.0133638	2.28249	0.0256086	0.999464	-3.37773
ZqKJpxpLGaIIKUIJeQ	EEF1D	eukaryotic translation elongation factor 1 delta	0.0824885	-0.00370543	2.28226	0.0256228	0.999464	-3.37811
HDfg6QMFQyXmxSITe4	ZNF608	zinc finger protein 608	0.126127	0.0101628	2.2808	0.0257141	0.999464	-3.3806
3uvtxXh3UnlHe4Vc7g	OR2B6	olfactory receptor family 2 subfamily B member 6	-0.185965	-0.0142909	-2.28076	0.0257166	0.999464	-3.38067
HaFSBPdSy5PS9BEkLk	SEPHS1	selenophosphate synthetase 1	0.132218	0.0257515	2.27977	0.0257783	0.999464	-3.38234
BOoiqyjsSqy.v8gUls	TNC	tenascin C	-0.164494	-0.000958718	-2.27957	0.025791	0.999464	-3.38268
Nlb98V1OfntedEXF54	CAPN11	calpain 11	-0.193394	0.0179169	-2.27823	0.0258747	0.999464	-3.38495
HfpDRJWSBTTu6SCXio	USP22	ubiquitin specific peptidase 22	0.118221	-0.000250052	2.27807	0.0258852	0.999464	-3.38523
oe6IJ3eGo1kL_WeOS4	TALDO1	transaldolase 1	0.0728351	0.00410258	2.27455	0.0261073	0.999464	-3.3912
3mICpKigaKiu6uJ4zA	WRAP53	WD repeat containing antisense to TP53	0.144193	0.0238611	2.27321	0.0261925	0.999464	-3.39347
Zr5EWiIBXEDuiDukCU	ZNF91	zinc finger protein 91	-0.225027	-0.0570979	-2.27303	0.0262037	0.999464	-3.39377
HTF49VhHoxYI4FQU9E	TDO2	tryptophan 2,3-dioxygenase	-0.208462	-0.0488123	-2.27179	0.0262827	0.999464	-3.39587
EpdJfAf_9cdUV0mB6k	SLC9A3R1	SLC9A3 regulator 1	0.079265	0.0124622	2.27113	0.0263249	0.999464	-3.39699
WgA1K5aKJIKOIDHolo	DBP	D-box binding PAR bZIP transcription factor	0.112318	-0.0478042	2.27075	0.0263488	0.999464	-3.39763
BH7oTTo_3BFNEtXp0o	FANCD2	Fanconi anemia complementation group D2	0.093381	0.0279517	2.27014	0.0263882	0.999464	-3.39867
9Rqu0oqIhJerOpCA4c	MADD	MAP kinase activating death domain	-0.123063	-0.0277903	-2.27009	0.026391	0.999464	-3.39874
Q35dRFdd1KFejg1ve4	RRP7A	ribosomal RNA processing 7 homolog A	0.0925828	-0.0381971	2.27007	0.0263923	0.999464	-3.39878
EgX.UL43NS4bpeupv0	TMEM158	transmembrane protein 158 (gene/pseudogene)	0.259484	-0.000909112	2.2694	0.0264355	0.999464	-3.39992
HrxQBRbkLajhJKh96U	FAM83H	family with sequence similarity 83 member H	-0.154771	-0.0529281	-2.26902	0.0264595	0.999464	-3.40055
0Sm4lFOVpSffDgM.1w	C1orf210	chromosome 1 open reading frame 210	0.232016	-0.00953339	2.26837	0.0265016	0.999464	-3.40166
oelKRQk7u5H7F66.d4	SLBP	stem-loop binding protein	0.0813605	0.0523394	2.26696	0.0265919	0.999464	-3.40403
ZrdJSVyIeffu.u097U	CAMLG	calcium modulating ligand	-0.0709469	-0.000578029	-2.26335	0.0268252	0.999464	-3.41013
xnUO7kn_Byp6r7q5d8	TMEM9B	TMEM9 domain family member B	0.0781938	-0.00991888	2.26187	0.0269216	0.999464	-3.41263
uUK90R6Xqfq5UzKK3s	IFI35	interferon induced protein 35	0.087176	-0.0037146	2.26137	0.0269541	0.999464	-3.41347
ir_h054gFRKAke1Kyg	MFAP1	microfibril associated protein 1	0.0759151	0.0122273	2.2612	0.0269649	0.999464	-3.41375
cSKJU.rLikrOqcgkes	CYP2D6	cytochrome P450 family 2 subfamily D member 6	0.195887	0.0175486	2.25819	0.0271622	0.999464	-3.41884
NpZXkX0mj_qPKd.ysE	HAGH	hydroxyacylglutathione hydrolase	-0.07783	-0.0172487	-2.25754	0.027205	0.999464	-3.41993
xz1S1tKD.sgqfTuesU	PNPO	pyridoxamine 5'-phosphate oxidase	0.0874587	0.00306268	2.25653	0.0272709	0.999464	-3.42162
9XRKqfeMV0BOiBLCok	SERP1	stress associated endoplasmic reticulum protein 1	0.102719	-0.0430854	2.25529	0.0273531	0.999464	-3.42372
6d17u7XqUdxS4.SHVk	JAML	junction adhesion molecule like	0.169618	0.124001	2.2536	0.0274648	0.999464	-3.42656
6LvpAYh.delXl56I0k	BLCAP	bladder cancer associated protein	0.0917621	0.0107789	2.25144	0.0276083	0.999464	-3.43019
BQkv9UU1PE1Kqj9faQ	TANK	TRAF family member associated NFKB activator	-0.0916393	-0.00724134	-2.25091	0.0276437	0.999464	-3.43109
NxWZ57yEdZT1693WBY	RAB40C	RAB40C, member RAS oncogene family	-0.0908528	0.00456732	-2.25023	0.0276886	0.999464	-3.43222
B91yrztS_q.8KSRIeU	UNG	uracil DNA glycosylase	0.106887	0.0299821	2.24863	0.0277958	0.999464	-3.43491
9cXeUALqp7Hqh52jjc	CERS2	ceramide synthase 2	-0.112914	0.00184745	-2.24669	0.0279259	0.999464	-3.43816
W.1bt6Hu7fH3ArkbH0	TRGV3	T cell receptor gamma variable 3	-0.0788634	0.0139181	-2.24422	0.0280926	0.999464	-3.44231
cdWKlAegEwi4edrqOg	PRPSAP2	phosphoribosyl pyrophosphate synthetase associated protein 2	-0.14981	-0.0277547	-2.24169	0.0282641	0.999464	-3.44655
WXuPXrpSzXo9dwjfl0	NSF	N-ethylmaleimide sensitive factor, vesicle fusing ATPase	-0.0745263	-0.00638032	-2.2397	0.0283993	0.999464	-3.44987
NOZsFtdX_tKnMVBehc	TFG	TRK-fused gene	-0.0802665	0.00708199	-2.23893	0.0284519	0.999464	-3.45116
6k8l5O.crfeULn.dL4	TMTC2	transmembrane and tetratricopeptide repeat containing 2	0.18729	0.0348654	2.2365	0.0286182	0.999464	-3.45521
ZJwknhL6KgJSXqp6ig	CCHCR1	coiled-coil alpha-helical rod protein 1	-0.187579	0.00728859	-2.23621	0.0286384	0.999464	-3.45571
ZdIDrSOtKJSc5JLMU0	ZDHHC17	zinc finger DHHC-type containing 17	0.106626	-0.00322997	2.23552	0.0286859	0.999464	-3.45686
f5_h7f4HeRdfUpTfuI	RNF217	ring finger protein 217	0.412679	0.0648299	2.23543	0.0286921	0.999464	-3.45701
TtwU8I81AtKepkunRk	PRRG4	proline rich and Gla domain 4	-0.185446	-0.00804457	-2.23172	0.0289485	0.999464	-3.4632
Bt9OVtPqCYRgqCSdxE	TFIP11	tuftelin interacting protein 11	0.0940839	0.0350389	2.23156	0.0289593	0.999464	-3.46346
WXEf5cPiUcUr.eknuk	USP37	ubiquitin specific peptidase 37	-0.127075	-0.0143494	-2.22984	0.0290794	0.999464	-3.46634
BZnicSh1Yu4lmvXe_Q	EIF3B	eukaryotic translation initiation factor 3 subunit B	0.11044	-0.000242453	2.22973	0.0290868	0.999464	-3.46652
Ng5.RokD3l0fdRoqVU	TP53I3	tumor protein p53 inducible protein 3	0.103359	-0.00100587	2.22843	0.0291777	0.999464	-3.46869
TCZCVZ9wtFGa96ApH4	BUD23	BUD23, rRNA methyltransferase and ribosome maturation factor	0.0787663	0.00909316	2.22811	0.0291998	0.999464	-3.46921
TPXO9LJuvjnPvyX1XU	YTHDC1	YTH domain containing 1	0.0686409	0.00543809	2.22763	0.0292335	0.999464	-3.47001
iKKgVb_bmVB1QukAKA	PCLAF	PCNA clamp associated factor	0.0786251	0.00952708	2.22594	0.0293518	0.999464	-3.47282
xHJLRIF7XVKe9eKXhQ	ITGA10	integrin subunit alpha 10	-0.169524	0.038351	-2.22464	0.0294435	0.999464	-3.47499
uuVMyuJNX8jTqBSSHk	KCTD3	potassium channel tetramerization domain containing 3	-0.107468	-0.00210302	-2.22422	0.029473	0.999464	-3.47569
KU7r4Pkh7qKSruInh0	SP140	SP140 nuclear body protein	0.109695	-0.096986	2.22256	0.0295905	0.999464	-3.47846
NjWn5UgIghJToLoJV8	LBHD1	LBH domain containing 1	0.106381	0.0164699	2.22252	0.0295934	0.999464	-3.47852
9Lh4IuqX.n.l6Myq50	VAMP4	vesicle associated membrane protein 4	0.150638	-0.00755086	2.22195	0.0296334	0.999464	-3.47946
rSm3mA0zp7JPbnNXqo	COX6C	cytochrome c oxidase subunit 6C	0.0703653	0.00471572	2.2206	0.029729	0.999464	-3.4817
3nh56kokFE04SA5Kjc	PAXIP1-AS2	PAXIP1 antisense RNA 2	-0.173654	0.00538235	-2.22025	0.0297544	0.999464	-3.4823
QbnSiZelHleQCeggng	TPM3	tropomyosin 3	0.10732	0.00517586	2.21938	0.029816	0.999464	-3.48373
QB76KIJ4KKeIViSL_U	TPM2	tropomyosin 2	-0.168431	-0.0358472	-2.21881	0.029857	0.999464	-3.48469
6d3ulupJFtzxSpA7eE	NCR3	natural cytotoxicity triggering receptor 3	0.111874	0.00714896	2.21556	0.030089	0.999464	-3.49007
K6bnLqOkjigghVG.ig	TAF13	TATA-box binding protein associated factor 13	-0.181019	0.0266739	-2.2152	0.0301152	0.999464	-3.49067
HT_qKSnqUCrInqwwO0	TRIM41	tripartite motif containing 41	0.15011	0.0139778	2.21169	0.0303682	0.999464	-3.49648
6d3q3oKIEp4qieIong	DERL3	derlin 3	0.164523	-0.00808261	2.21074	0.0304372	0.999464	-3.49806
WVSu6rJC7n1tCMUz3U	CADPS2	calcium dependent secretion activator 2	-0.175712	0.0177	-2.21066	0.0304426	0.999464	-3.49818
KUK7wqjLF1Q9CSIB4U	HHEX	hematopoietically expressed homeobox	-0.157593	-0.020965	-2.20907	0.0305583	0.999464	-3.50082
WJLHpIFIDlnoJG0B50	SNX20	sorting nexin 20	0.153486	-0.0311032	2.20886	0.0305738	0.999464	-3.50117
finSkqVEpJY937nj8A	SDCBP2	syndecan binding protein 2	-0.257075	-0.0242817	-2.20809	0.0306295	0.999464	-3.50243
cXUDd_ftPh35u0P1dI	INTS6	integrator complex subunit 6	-0.0713237	-0.0145418	-2.20791	0.0306427	0.999464	-3.50273
HNDNKeVR1G9VJE1Sus	SGSM3	small G protein signaling modulator 3	0.140359	0.00705122	2.20774	0.0306554	0.999464	-3.50302
05Fewg6HwCx56EpO7k	WAC	WW domain containing adaptor with coiled-coil	-0.0835416	-0.0102338	-2.20728	0.0306892	0.999464	-3.50378
B3e9dIvsrdSM7VS51E	ZNF20	zinc finger protein 20	-0.100074	0.0294063	-2.20618	0.0307692	0.999464	-3.50559
fUpHTp93p69H3V6dIQ	PARVB	parvin beta	-0.156395	0.0212318	-2.20489	0.030864	0.999464	-3.50773
Qt_Bx7ty6kDtPvF3u4	AGL	amylo-alpha-1, 6-glucosidase, 4-alpha-glucanotransferase	0.0678285	-0.0171441	2.20481	0.0308698	0.999464	-3.50786
rpJwpdSpqt1MwcRr04	TBC1D10A	TBC1 domain family member 10A	-0.124054	-0.0339665	-2.20347	0.0309684	0.999464	-3.51007
03FVHFl.P3c.V_X00U	AGO3	argonaute 3, RISC catalytic component	-0.123195	-0.0141568	-2.20319	0.030989	0.999464	-3.51053
3mlSZXSo06VKyS7UV4	GTF2IRD2B	GTF2I repeat domain containing 2B	0.115382	0.031211	2.2014	0.0311212	0.999464	-3.51349
ZnfAAeVPYool_SKuAk	CFAP69	cilia and flagella associated protein 69	-0.147381	0.0044999	-2.20131	0.0311274	0.999464	-3.51363
lpTe6eir3g7Xd1O0pI	PLBD2	phospholipase B domain containing 2	-0.147912	5.5835e-05	-2.20092	0.0311566	0.999464	-3.51428
Qh7SBT3kHizgNEhS4o	UNC13C	unc-13 homolog C	0.173564	-0.0407666	2.20016	0.0312129	0.999464	-3.51553
EU4osUop8Y4uXoorks	NHP2	NHP2 ribonucleoprotein	0.0865098	0.0222528	2.20004	0.0312216	0.999464	-3.51572
3ruDUjOa3w9f6AxEvY	RABGEF1	RAB guanine nucleotide exchange factor 1	-0.176384	0.00108437	-2.19974	0.0312439	0.999464	-3.51622
HGe4B.QNffS0vUOK6o	FCGR3B	Fc fragment of IgG receptor IIIb	0.143182	-0.0349475	2.19813	0.0313637	0.999464	-3.51887
6ur92ermG4P7gnSjlQ	DNAJC12	DnaJ heat shock protein family (Hsp40) member C12	-0.266867	-0.0896094	-2.19714	0.0314373	0.999464	-3.5205
NlPiS10ivOh3QmHDoM	SMIM13	small integral membrane protein 13	0.160892	0.0190578	2.19491	0.0316044	0.999464	-3.52417
TLR.4ldNCd0_46ioxc	CLDN12	claudin 12	-0.109212	-0.0188275	-2.19436	0.0316455	0.999464	-3.52508
oJ1.tndOntI161dRHo	AGPAT3	1-acylglycerol-3-phosphate O-acyltransferase 3	-0.133952	0.0241322	-2.19428	0.0316519	0.999464	-3.52522
cbfiOkT1xj4IKrfiNU	NCK2	NCK adaptor protein 2	-0.0755594	-0.0114085	-2.19194	0.0318274	0.999464	-3.52905
oPRapQuuzt91CeCpbo	MIA	melanoma inhibitory activity	-0.181485	-0.0522739	-2.19133	0.0318736	0.999464	-3.53006
laDrQERISKKUxIVvQg	VRK1	vaccinia related kinase 1	0.0859641	0.0234155	2.19125	0.0318796	0.999464	-3.53019
iVuivpNStGUijhj780	BCL11A	B-cell CLL/lymphoma 11A	-0.147645	-0.0302516	-2.19124	0.0318806	0.999464	-3.53021
cSMehONxSpphciC7BY	SULT1A3	sulfotransferase family 1A member 3	0.167086	-0.0238254	2.19119	0.0318845	0.999464	-3.53029
WwAVaCpoRdRNl.5Rf0	SLC38A1	solute carrier family 38 member 1	-0.172503	0.0293608	-2.19075	0.0319172	0.999464	-3.531
Ql4eUJTqyXq7AF6I64	DDB1	damage specific DNA binding protein 1	-0.0553315	0.0143747	-2.1907	0.0319216	0.999464	-3.5311
3CgKpeK5Se7Xq8qvqo	SLC43A1	solute carrier family 43 member 1	0.247847	-0.00280297	2.19046	0.0319394	0.999464	-3.53148
x1_3nnP4LDyxJ5I3d4	DENND4A	DENN domain containing 4A	-0.144706	-0.0276983	-2.18926	0.0320307	0.999464	-3.53346
fuQ43TnShL5kqHXqIw	PAPD5	poly(A) RNA polymerase D5, non-canonical	-0.168263	0.0108249	-2.18865	0.0320763	0.999464	-3.53445
933K44v3H13r.xBKA4	IDS	iduronate 2-sulfatase	0.120877	-0.040558	2.18751	0.032163	0.999464	-3.53632
9n5XXlFfVfsjHl8EdU	FAM219A	family with sequence similarity 219 member A	0.159244	-0.00677539	2.18555	0.0323127	0.999464	-3.53954
xx5u5Nhh511JB5O5pQ	EHMT1	euchromatic histone lysine methyltransferase 1	0.180542	-0.0579233	2.18354	0.0324666	0.999464	-3.54283
EJF7X6oWN5buFKoIC8	HIVEP3	human immunodeficiency virus type I enhancer binding protein 3	-0.120578	-0.0618293	-2.18273	0.0325291	0.999464	-3.54416
91Z.tRpirdZ6xlpeSA	TSPO	translocator protein	0.151044	0.0291568	2.18113	0.0326525	0.999464	-3.54679
oq.teU5_rvTUvQofUU	TATDN3	TatD DNase domain containing 3	0.114	0.0556236	2.17953	0.0327759	0.999464	-3.5494
TWd_i.ctHRULQM7pEo	GSTCD	glutathione S-transferase C-terminal domain containing	-0.217516	-0.0167456	-2.17902	0.032815	0.999464	-3.55022
okB2FVvXlSMOnQwd4o	INPP5B	inositol polyphosphate-5-phosphatase B	0.109305	0.0235883	2.17898	0.032818	0.999464	-3.55029
NotSc_ee_tU8JBxSP8	PMPCB	peptidase, mitochondrial processing beta subunit	0.0591482	0.0094301	2.17853	0.0328532	0.999464	-3.55103
NuhfT1PnqWXvXUYQJE	SOS1	SOS Ras/Rac guanine nucleotide exchange factor 1	-0.125702	-0.00105552	-2.17795	0.0328981	0.999464	-3.55198
lTbc59X5XdSdRdFSJE	PILRA	paired immunoglobin like type 2 receptor alpha	-0.141776	-0.00935273	-2.17737	0.0329435	0.999464	-3.55293
BkRIko5TnroT4IfhSE	SCHIP1	schwannomin interacting protein 1	-0.145179	0.0370572	-2.17687	0.0329821	0.999464	-3.55374
BdKoJdIjxEvKOeES3I	KCNH8	potassium voltage-gated channel subfamily H member 8	0.155736	-0.0316127	2.17533	0.0331024	0.999464	-3.55626
xCvKwREyp7xoeILtXk	ZNF256	zinc finger protein 256	0.10643	0.0309289	2.17395	0.0332104	0.999464	-3.55852
c4p14g0FQeCT9D0fg4	NLK	nemo like kinase	-0.108954	-0.0357113	-2.17275	0.0333043	0.999464	-3.56047
HRSSf1Sfd7irR55UeQ	GAMT	guanidinoacetate N-methyltransferase	0.0941456	-0.0664475	2.17266	0.033311	0.999464	-3.56061
QZekFCzTFvUeUUAoKs	TMEM126B	transmembrane protein 126B	-0.0772763	-0.00621423	-2.17063	0.0334705	0.999464	-3.56392
6AguibteCi9RSlqCVM	C21orf33	chromosome 21 open reading frame 33	0.09551	-0.00575331	2.16996	0.0335239	0.999464	-3.56502
cktZAXXgupJQS.4iJQ	LCMT1	leucine carboxyl methyltransferase 1	0.080591	0.0220602	2.16659	0.0337907	0.999464	-3.5705
3oXlB1FR65dXgv8bl8	PCOLCE	procollagen C-endopeptidase enhancer	-0.174176	0.0184292	-2.16555	0.0338731	0.999464	-3.57219
BVjSWxZEiAhDlkdnYg	ELOA3B	elongin A3 family member B	-0.170304	0.0220823	-2.16531	0.0338923	0.999464	-3.57258
QToPpb6nxdefbhfXXk	COX8A	cytochrome c oxidase subunit 8A	0.0600713	0.0201836	2.16527	0.0338954	0.999464	-3.57264
9oNerotQRDRGiFFN4k	TMEM266	transmembrane protein 266	0.191536	-0.00607229	2.1644	0.0339648	0.999464	-3.57406
9op4popKPn4zioj4p4	ZNF526	zinc finger protein 526	-0.111693	-0.00561645	-2.16425	0.0339767	0.999464	-3.5743
ZqjigghBw5Rn9R7u8E	DNAL1	dynein axonemal light chain 1	-0.108381	-0.059847	-2.16361	0.0340284	0.999464	-3.57535
Z_e5D76oqyqgKYiiMc	PIK3R3	phosphoinositide-3-kinase regulatory subunit 3	0.173514	-0.0252433	2.16357	0.0340315	0.999464	-3.57541
EXpXhIkcSTQLA3_qEs	HMGXB4	HMG-box containing 4	-0.0989596	0.00872609	-2.16346	0.0340403	0.999464	-3.57559
xVkl.VQiRUESQgJUeA	ALG3	ALG3, alpha-1,3- mannosyltransferase	-0.0752869	0.04963	-2.16337	0.0340476	0.999464	-3.57574
fAqn9O2.X15155EnlI	DHCR7	7-dehydrocholesterol reductase	0.0964879	-0.0257899	2.16336	0.0340479	0.999464	-3.57575
od1UtXAK77i63RJUco	ZNF671	zinc finger protein 671	-0.100149	0.00103832	-2.16305	0.0340729	0.999464	-3.57625
cXoBg.A67QHkiQSp9I	WASHC4	WASH complex subunit 4	0.145825	-0.0496707	2.16239	0.0341263	0.999464	-3.57734
HWMBKUeCd2VewfMVRU	RNPS1	RNA binding protein with serine rich domain 1	0.141631	0.0117209	2.16227	0.0341354	0.999464	-3.57752
E1FtUR.Kq_s3bnfdSI	CSNK2A1	casein kinase 2 alpha 1	0.0880268	0.0230462	2.1621	0.0341496	0.999464	-3.57781
fde6NpO4kkuEi6kJfE	TBC1D23	TBC1 domain family member 23	-0.114841	0.000698775	-2.16002	0.0343165	0.999464	-3.58118
3fFSV60IN7ik7h4LHA	GRAMD2B	GRAM domain containing 2B	-0.0784701	0.0399971	-2.15909	0.0343911	0.999464	-3.58268
HPuot1m1Z2eoiKxd18	MATR3	matrin 3	0.134888	-0.0479506	2.15789	0.0344882	0.999464	-3.58463
BSU33sKuVLuH2vjXnk	PIAS2	protein inhibitor of activated STAT 2	-0.0750487	-0.0176708	-2.15739	0.0345288	0.999464	-3.58544
cohpUKQJELEVNdLA2I	DHX29	DExH-box helicase 29	-0.101571	0.0116607	-2.15626	0.0346204	0.999464	-3.58727
6.MIEAperlxW7qpHuo	IP6K2	inositol hexakisphosphate kinase 2	-0.197509	-0.0237818	-2.15601	0.0346409	0.999464	-3.58768
lVNSvgOoigfsdJPSTQ	PRMT9	protein arginine methyltransferase 9	-0.114956	0.00978809	-2.1557	0.0346656	0.999464	-3.58818
T4a1IoAqWo24WomGmg	SNRNP70	small nuclear ribonucleoprotein U1 subunit 70	0.146272	0.0494772	2.15518	0.0347081	0.999464	-3.58902
T1FEoOzRB8FvVv7yHI	KL	klotho	-0.132221	0.0280615	-2.15298	0.0348878	0.999464	-3.59259
uuuOTlzL.Jx_oq6XiU	ZNF562	zinc finger protein 562	-0.127771	-0.00300624	-2.15178	0.0349855	0.999464	-3.59452
cR4NJTsmje0vxJdgok	GMCL1	germ cell-less, spermatogenesis associated 1	-0.09944	0.0063976	-2.15092	0.0350563	0.999464	-3.59592
rk_eIEBUXiRVIRfXQU	LST1	leukocyte specific transcript 1	0.166706	-0.0115041	2.14909	0.0352072	0.999464	-3.59888
9ChS7dUoN5KLeCKKC0	NBPF14	NBPF member 14	-0.15273	0.0224476	-2.14817	0.0352825	0.999464	-3.60036
653hNrk1mB2M9J6eo4	HSD17B6	hydroxysteroid 17-beta dehydrogenase 6	-0.163485	-0.0327753	-2.14555	0.0354996	0.999464	-3.6046
BqejF0EIeIl.VZ93UI	SLCO5A1	solute carrier organic anion transporter family member 5A1	-0.113356	0.0503327	-2.14491	0.0355524	0.999464	-3.60562
KUknUYwCoFeJIETkQE	LINC00158	long intergenic non-protein coding RNA 158	-0.140804	-0.0297797	-2.14436	0.0355984	0.999464	-3.60651
HIlrmmlmH1WGapniCQ	SPAG1	sperm associated antigen 1	-0.162752	-0.0184367	-2.1443	0.0356037	0.999464	-3.60662
xpwegAnqts9wucCCnk	PDE8A	phosphodiesterase 8A	0.141544	-0.0222705	2.14409	0.0356206	0.999464	-3.60694
fmEsnX95cs3kgR6fwE	RAP1A	RAP1A, member of RAS oncogene family	-0.126679	0.00320758	-2.14305	0.0357073	0.999464	-3.60862
9pf09n02ULseIUV6EU	FICD	FIC domain containing	-0.15618	-0.067894	-2.14028	0.0359393	0.999464	-3.61309
upZTAWUjQXoncZdcb8	FTH1P7	ferritin heavy chain 1 pseudogene 7	0.0604015	0.0125706	2.13837	0.0360999	0.999464	-3.61617
0vH1Sj_d5VAYnvTBJg	EVC	EvC ciliary complex subunit 1	-0.181512	0.0438416	-2.1379	0.0361395	0.999464	-3.61692
x2L9WFOI4dRORxTeKU	SNORD33	small nucleolar RNA, C/D box 33	0.118957	0.0140297	2.13734	0.0361864	0.999464	-3.61782
fXnlVdRS5f_SIjP_7E	SNTA1	syntrophin alpha 1	-0.0898234	-0.00998131	-2.13639	0.036267	0.999464	-3.61935
lJJoXqe97vgou5UuV8	AP3D1	adaptor related protein complex 3 delta 1 subunit	-0.0959209	0.00274895	-2.13471	0.0364092	0.999464	-3.62205
ZuvNCp66pLoo_KIz60	GTPBP10	GTP binding protein 10	-0.217111	0.0285443	-2.13409	0.0364616	0.999464	-3.62304
of0kyHwdXwlSE3viF4	HMGN2	high mobility group nucleosomal binding domain 2	0.0721082	0.0211426	2.13351	0.0365106	0.999464	-3.62397
TSJ6GC3nCIjop7podc	KIAA1328	KIAA1328	0.115214	-0.013096	2.13264	0.0365848	0.999464	-3.62537
cF6IuCGpOGkrgqv57g	ZSCAN2	zinc finger and SCAN domain containing 2	-0.103127	-0.0456751	-2.13174	0.0366615	0.999464	-3.62681
3iiiDugisAJ6kQvTOU	NAA50	N(alpha)-acetyltransferase 50, NatE catalytic subunit	-0.12063	-0.000162128	-2.13019	0.0367944	0.999464	-3.62931
cXSqSp_6d67yvSqfSE	CCDC184	coiled-coil domain containing 184	0.153027	-0.0477283	2.12851	0.0369384	0.999464	-3.632
c0eXxdXRr77ih4u7oI	TMEM173	transmembrane protein 173	-0.109153	-0.0221603	-2.12844	0.0369443	0.999464	-3.63211
NeJernR7prVbXpzgF8	NKG7	natural killer cell granule protein 7	-0.160669	-0.0241964	-2.12672	0.037092	0.999464	-3.63486
QV17p3xfvdX5Is6k6I	TRMT10B	tRNA methyltransferase 10B	-0.0910125	-0.00107804	-2.12482	0.0372565	0.999464	-3.63791
o3kq6E6Oz2.eNOIIp0	CAPS2	calcyphosine 2	0.118546	-0.0411039	2.12457	0.0372784	0.999464	-3.63831
fR1MSzyuKOjmpntflo	EHD1	EH domain containing 1	-0.0704724	-0.00119314	-2.12394	0.0373322	0.999464	-3.63931
9ezChdEkHfVHhtFuE4	CENPO	centromere protein O	-0.12882	0.0217114	-2.1229	0.037423	0.999464	-3.64098
lvrv31_lf_hw7x7UL0	PTPRO	protein tyrosine phosphatase, receptor type O	-0.205777	-0.0153191	-2.12272	0.0374389	0.999464	-3.64127
rjovhekON7pwTlt3eU	SEPT6	septin 6	0.111682	-0.0105363	2.12088	0.0375989	0.999464	-3.64421
iqpSh3saSlIAinv7CM	BAG4	BCL2 associated athanogene 4	-0.137953	0.0179979	-2.11907	0.0377569	0.999464	-3.6471
ZgI5e7.Xe6pW5H16Ig	PIEZO2	piezo type mechanosensitive ion channel component 2	-0.132624	-0.0135601	-2.11826	0.0378283	0.999464	-3.6484
iop4knku.e1ooDo3yk	PHLPP1	PH domain and leucine rich repeat protein phosphatase 1	0.161563	0.0570811	2.11824	0.03783	0.999464	-3.64843
WoI0roEkWp7QvEQw0E	SPECC1	sperm antigen with calponin homology and coiled-coil domains 1	0.158728	0.00785228	2.11745	0.0378988	0.999464	-3.64968
ue4H06SATF57z4EFXo	TTC30B	tetratricopeptide repeat domain 30B	-0.169672	0.0183291	-2.11704	0.0379346	0.999464	-3.65033
lRupI54_hSGll40ol8	SIVA1	SIVA1 apoptosis inducing factor	0.0894762	0.0243826	2.11688	0.0379489	0.999464	-3.65059
i0UleI_KVTEUuCKJKI	MON1A	MON1 homolog A, secretory trafficking associated	-0.182528	-0.0557468	-2.11678	0.0379583	0.999464	-3.65076
oKtUJLUiCO3u6f1dXk	UBQLN4	ubiquilin 4	-0.0687906	0.0107696	-2.11653	0.0379798	0.999464	-3.65115
0VTluKu6Ho4EK46Rv0	NDUFV1	NADH:ubiquinone oxidoreductase core subunit V1	0.0840732	-0.00317958	2.11577	0.0380468	0.999464	-3.65236
NIuXXu9Suf7kzP93jU	C1orf52	chromosome 1 open reading frame 52	-0.0843117	0.0187417	-2.11216	0.0383666	0.999464	-3.65812
36U54eVFuSkIBN7Un4	SCNM1	sodium channel modifier 1	0.0842309	0.0247984	2.1121	0.0383711	0.999464	-3.6582
o_hXSPe8FAPkg6qlKU	SUV39H2	suppressor of variegation 3-9 homolog 2	0.160948	0.0255445	2.11199	0.0383815	0.999464	-3.65839
6tzuVVEks6f1JxVP6Y	WNK1	WNK lysine deficient protein kinase 1	0.141084	0.0163608	2.11192	0.0383871	0.999464	-3.65849
BS6WEpPo5IFyJS.0oE	LONRF1	LON peptidase N-terminal domain and ring finger 1	-0.0907985	0.0261308	-2.11172	0.0384055	0.999464	-3.65882
QefpFMnwXkv30A5UOU	SPATS2	spermatogenesis associated serine rich 2	0.0997356	0.0251492	2.11125	0.0384469	0.999464	-3.65956
iXGj5VRV0URFUjjgcc	ALAS1	5'-aminolevulinate synthase 1	0.122286	-0.0123432	2.10944	0.0386087	0.999464	-3.66245
E6.xf9ai3UnpXT_7Wg	UGP2	UDP-glucose pyrophosphorylase 2	-0.153921	-0.0246786	-2.10928	0.0386225	0.999464	-3.6627
3K3u6_30akNKCoiJ6o	TIMM10B	translocase of inner mitochondrial membrane 10B	-0.110481	0.0145737	-2.10914	0.0386354	0.999464	-3.66293
rla5l9zxP5cE3_hukg	MRPL3	mitochondrial ribosomal protein L3	-0.0686058	0.008566	-2.10909	0.0386397	0.999464	-3.663
cT7lNEBdvUll_VMcj0	IDNK	IDNK, gluconokinase	0.0747118	-0.0258518	2.10872	0.038673	0.999464	-3.6636
BGzdU5lC6JVSUIJSUQ	EEF1D	eukaryotic translation elongation factor 1 delta	0.0953937	0.0100443	2.10861	0.0386821	0.999464	-3.66376
r7V4sijnnObi9OhEL4	UHMK1	U2AF homology motif kinase 1	-0.152949	0.014619	-2.10782	0.0387527	0.999464	-3.66501
ZhFLh3iSqEgSh6fuCk	MFSD6L	major facilitator superfamily domain containing 6 like	-0.157807	0.0122467	-2.10664	0.0388593	0.999464	-3.6669
QeUV54t73rDarMMp3k	JAG1	jagged 1	-0.128428	0.0588365	-2.10573	0.0389404	0.999464	-3.66834
0VUoQQHlfCLT9fvNEo	C2CD5	C2 calcium dependent domain containing 5	0.0692291	0.0206988	2.10376	0.0391184	0.999464	-3.67147
ZrKqxxyoze6Tjzk9bI	GPM6A	glycoprotein M6A	-0.26457	0.0352989	-2.1017	0.0393047	0.999464	-3.67474
oKnieZ_bp79OFn7.3U	ITPR3	inositol 1,4,5-trisphosphate receptor type 3	-0.0842437	-0.00134035	-2.10154	0.0393194	0.999464	-3.675
uYHTnoIByARTxL1Jd8	DCAF6	DDB1 and CUL4 associated factor 6	0.117748	0.00172891	2.10144	0.0393279	0.999464	-3.67514
um0iUnihKfl6H3sIyg	ACKR3	atypical chemokine receptor 3	0.174912	0.0979317	2.10126	0.0393448	0.999464	-3.67544
0Uvp50qIjnc3px2zYE	ANKRA2	ankyrin repeat family A member 2	0.126132	0.0498011	2.10095	0.039373	0.999464	-3.67593
EXn1P3VRdHdFC0Uiro	SLC16A2	solute carrier family 16 member 2	-0.182477	0.0185264	-2.10022	0.0394389	0.999464	-3.67708
6o5bRRSRGgcXVFV._w	CPSF1	cleavage and polyadenylation specific factor 1	0.0823536	0.0108005	2.09883	0.039566	0.999464	-3.67929
0t_uvX27qn42755e8E	BPHL	biphenyl hydrolase like	-0.082527	-0.00740793	-2.09859	0.0395877	0.999464	-3.67967
9kYHoe7kGf.qIOO1W8	LDLR	low density lipoprotein receptor	-0.0739795	-0.0301965	-2.09856	0.0395901	0.999464	-3.67971
QuRIVe73mrgQeVHBSE	SLC29A3	solute carrier family 29 member 3	-0.158046	-0.00730478	-2.09826	0.0396176	0.999464	-3.68019
6qd3g1xev30p96H5yk	BCDIN3D	BCDIN3 domain containing RNA methyltransferase	0.0832181	0.00262874	2.09707	0.0397261	0.999464	-3.68207
Wq4r_VHt3koKdafDco	CSRNP2	cysteine and serine rich nuclear protein 2	-0.0942617	0.00109499	-2.09568	0.0398533	0.999464	-3.68426
fif7nggv.rqfy4e5.k	ELK4	ELK4, ETS transcription factor	-0.113	-0.0538889	-2.09476	0.0399382	0.999464	-3.68572
rn2nrSofrRK.9AqcZc	SNRNP35	small nuclear ribonucleoprotein U11/U12 subunit 35	0.0871739	0.0332962	2.0943	0.0399806	0.999464	-3.68645
o8b_qwUlwug36CgLCo	PTP4A1	protein tyrosine phosphatase type IVA, member 1	-0.127406	-0.059798	-2.09274	0.0401247	0.999464	-3.68892
oQkJ1QqOuV73cUJzXo	IL16	interleukin 16	-0.167779	0.0332025	-2.09208	0.0401853	0.999464	-3.68996
KWT26oiJsiv1qSw9zU	HIST1H3G	histone cluster 1 H3 family member g	0.138679	0.146424	2.09099	0.0402863	0.999464	-3.69168
EJDfpf3J7uFUpa0NXU	LINC00173	long intergenic non-protein coding RNA 173	-0.203331	-0.0611264	-2.09031	0.0403492	0.999464	-3.69275
NG_Lp56Od7GoK14aOI	PYCARD	PYD and CARD domain containing	0.0805789	-0.0267633	2.08923	0.0404499	0.999464	-3.69447
HunnrG7jf4AX6fyV3o	FGFR1OP	FGFR1 oncogene partner	-0.0745049	0.000872115	-2.08913	0.0404591	0.999464	-3.69462
Bohqovgi7pWT7Xr1Qw	CYP27A1	cytochrome P450 family 27 subfamily A member 1	0.153394	0.0209748	2.08898	0.0404727	0.999464	-3.69485
WeFGdFdNS1MeM._QoE	FILIP1L	filamin A interacting protein 1 like	-0.113137	0.0108208	-2.08855	0.0405128	0.999464	-3.69553
Q0YrlfiXqo5JLhe9QI	TMEM8B	transmembrane protein 8B	0.169028	0.0220362	2.08759	0.0406025	0.999464	-3.69705
0hLjntvRWEBHh9xNro	H2AFY	H2A histone family member Y	-0.091671	-0.0924603	-2.08612	0.0407398	0.999464	-3.69937
ToJIPCSKI647Z_kERU	NGLY1	N-glycanase 1	-0.0865629	-0.0465291	-2.08605	0.0407458	0.999464	-3.69947
xI93L.dXKjqCqk_KQk	TOB2	transducer of ERBB2, 2	0.12464	0.00591326	2.08487	0.0408561	0.999464	-3.70132
cSv15J2cXC797KoKJQ	CLUAP1	clusterin associated protein 1	-0.138528	-0.012776	-2.08415	0.0409241	0.999464	-3.70247
liLkAfgEIgLpeXpNd4	CRYZL1	crystallin zeta like 1	0.150733	0.0181602	2.08338	0.0409963	0.999464	-3.70367
9IUULEquOg7YAF.ogU	DENND4A	DENN domain containing 4A	-0.117117	-0.00150553	-2.08204	0.0411226	0.999464	-3.70578
K.qs6qi794Xn_SG5dY	RIPK4	receptor interacting serine/threonine kinase 4	-0.156492	0.00603982	-2.0806	0.0412586	0.999464	-3.70805
uEReUHkXN_F56kXq30	CTSC	cathepsin C	0.117063	0.064587	2.08009	0.0413064	0.999464	-3.70884
W16p67dKJKre7cSOp4	LMAN2	lectin, mannose binding 2	0.149453	-0.00777146	2.07764	0.0415394	0.999464	-3.7127
36WqcXUjtVHfQJQjrI	ABCC6P2	ATP binding cassette subfamily C member 6 pseudogene 2	0.157864	-0.00465666	2.07752	0.0415506	0.999464	-3.71289
Wu5eo99Lr9KSMviHqk	LRIG2	leucine rich repeats and immunoglobulin like domains 2	0.127675	-0.0157176	2.07736	0.0415657	0.999464	-3.71314
66tPLp1v__7e.1XX14	SYT15	synaptotagmin 15	0.103839	-0.0185632	2.0769	0.0416097	0.999464	-3.71386
KIuUiBb5.1i_d99SnU	SERF1B	small EDRK-rich factor 1B	0.0940951	0.015801	2.07619	0.0416773	0.999464	-3.71497
oIYpYSpSJQpSJ4JSzg	MAGEF1	MAGE family member F1	0.123841	0.00501661	2.07549	0.0417445	0.999464	-3.71608
WeiwnEo3Aklf.Ety8o	CAST	calpastatin	-0.0907854	-0.0124405	-2.07513	0.0417788	0.999464	-3.71664
ZSoLr4Vda6elHeci1M	WASH7P	WAS protein family homolog 7 pseudogene	0.13375	0.0404092	2.07252	0.0420291	0.999464	-3.72074
TknkvTonb9AqQjcAek	RBM26	RNA binding motif protein 26	-0.0843166	0.0137216	-2.07045	0.0422283	0.999464	-3.72398
0SecnSEUCqwpUoT0zc	PLEKHA7	pleckstrin homology domain containing A7	-0.183041	0.0380597	-2.0684	0.0424263	0.999464	-3.72718
9Zjdp0eQXWXXq9CQt8	PPIL3	peptidylprolyl isomerase like 3	0.167037	-0.0499924	2.06809	0.0424558	0.999464	-3.72766
ZqfJR2U6HVICCdxIo0	FSD1L	fibronectin type III and SPRY domain containing 1 like	-0.129556	0.0443648	-2.06795	0.0424698	0.999464	-3.72788
oHQJwoktKBUjCAlNcs	EXOG	exo/endonuclease G	0.135424	-0.0581572	2.06681	0.0425802	0.999464	-3.72966
QIQNL43V4lEaXT3uKg	TXNDC16	thioredoxin domain containing 16	-0.172971	0.068749	-2.06576	0.0426829	0.999464	-3.73131
9ufhACQiiElsegij3k	SYAP1	synapse associated protein 1	-0.114103	-0.038822	-2.06393	0.0428612	0.999464	-3.73416
EckuyNPUjS6qKkXSQU	VPS11	VPS11, CORVET/HOPS core subunit	-0.115241	-0.0241687	-2.06296	0.0429561	0.999464	-3.73568
rClSqivKIeMk7jp0p4	MAP3K12	mitogen-activated protein kinase kinase kinase 12	-0.130798	0.0165017	-2.06227	0.0430235	0.999464	-3.73675
xpJ.yWreQozgXR3ol4	ACY1	aminoacylase 1	0.0836337	0.0241175	2.06222	0.0430281	0.999464	-3.73683
B8p.nM1UpQMk7hEoSU	TNFRSF10B	TNF receptor superfamily member 10b	-0.0899298	0.00721681	-2.06125	0.0431236	0.999464	-3.73834
oTptYXmtAHRi3qognQ	CALML4	calmodulin like 4	-0.103917	0.0152326	-2.06092	0.0431564	0.999464	-3.73886
xpL_1VSfazl9KgK0Sc	PREX1	phosphatidylinositol-3,4,5-trisphosphate dependent Rac exchange factor 1	0.104772	-0.016506	2.06044	0.0432034	0.999464	-3.73961
ul73eU9XLTXuXRRJ_c	KBTBD4	kelch repeat and BTB domain containing 4	0.0751028	-0.0177782	2.05945	0.0433011	0.999464	-3.74116
Klh1SVpQAhAETIZER0	NFIC	nuclear factor I C	-0.163898	-0.0199826	-2.0594	0.0433055	0.999464	-3.74123
TyjypSpSAtrN_vud6o	STRIP1	striatin interacting protein 1	0.1425	-0.0251092	2.05879	0.0433662	0.999464	-3.74218
xx3SinUU70qP2hlh5I	ACTR3B	ARP3 actin related protein 3 homolog B	0.167833	0.017848	2.05831	0.0434136	0.999464	-3.74293
3t9fhRTT15ePIqfXTo	SAMD9L	sterile alpha motif domain containing 9 like	0.0860874	0.00821799	2.05808	0.0434362	0.999464	-3.74329
rn3UjVSZSi6.lax9E8	FAM184A	family with sequence similarity 184 member A	-0.200591	-0.0822161	-2.05793	0.043451	0.999464	-3.74352
Q5H8VSyV4LupVsV3sU	RBPMS	RNA binding protein with multiple splicing	-0.172377	-0.0529601	-2.05614	0.0436282	0.999464	-3.7463
TTVSIXfu9eUTJ5Sp8I	RTL8A	retrotransposon Gag like 8A	0.103113	0.00788667	2.05576	0.0436663	0.999464	-3.7469
9SEKkN_s.A3iTpL3FM	SEC24A	SEC24 homolog A, COPII coat complex component	-0.122753	-0.0124014	-2.0546	0.0437813	0.999464	-3.7487
lv.m6i7uXm6u7m7_r8	SIAH1	siah E3 ubiquitin protein ligase 1	-0.0919442	0.00708413	-2.05415	0.0438258	0.999464	-3.7494
0npZXr0z_L8PseFehU	CYTH3	cytohesin 3	-0.131137	0.0875569	-2.05391	0.0438499	0.999464	-3.74977
llyeeU.eweVIKuEj94	CDC40	cell division cycle 40	0.0550116	-0.0216676	2.05283	0.0439575	0.999464	-3.75145
oKl7qJeQHR50IIToh0	SLC2A1	solute carrier family 2 member 1	-0.126005	0.0445698	-2.05018	0.0442233	0.999464	-3.75557
KSggllXXeqUz.3nq0Q	SOBP	sine oculis binding protein homolog	-0.149222	0.00899644	-2.04968	0.044273	0.999464	-3.75634
HpT_uQ.IC76XV9ZyUQ	BRMS1L	breast cancer metastasis-suppressor 1 like	0.0867653	0.0670906	2.0493	0.0443113	0.999464	-3.75693
0EmDkCA36hIFwDp10o	XRCC4	X-ray repair cross complementing 4	-0.175008	-0.0482916	-2.0491	0.0443321	0.999464	-3.75725
rlO55uXug3ouKrAJ40	STAT5A	signal transducer and activator of transcription 5A	-0.0958696	-0.0205366	-2.0488	0.0443616	0.999464	-3.75771
conjp0ep36KoO4IBQo	NDUFAF3	NADH:ubiquinone oxidoreductase complex assembly factor 3	0.16998	0.00244222	2.04834	0.0444083	0.999464	-3.75842
9HupjiArrod98ekqUU	PTGES3L-AARSD1	PTGES3L-AARSD1 readthrough	0.097186	0.0337019	2.04821	0.0444213	0.999464	-3.75862
KRXrypIO8CFN_ki9SU	C2orf42	chromosome 2 open reading frame 42	-0.0723033	0.00421216	-2.04784	0.0444585	0.999464	-3.7592
ofO.dSh4FNCEXgF804	SDHAP3	succinate dehydrogenase complex flavoprotein subunit A pseudogene 3	0.212928	0.0144514	2.0477	0.0444726	0.999464	-3.75941
QxXiIlfnpRV4gTlxec	LSS	lanosterol synthase	-0.155046	0.0387597	-2.04695	0.0445486	0.999464	-3.76058
f0KH150SVhgKOUDe0I	RPL38	ribosomal protein L38	0.0587544	0.00328367	2.04671	0.0445726	0.999464	-3.76095
Qt.sP9EFntT7_KO8XE	ATP11C	ATPase phospholipid transporting 11C	-0.0832962	-0.0282641	-2.04469	0.0447772	0.999464	-3.76408
BRySy6pllDcE4kSufQ	KBTBD2	kelch repeat and BTB domain containing 2	-0.0893689	0.0261653	-2.0439	0.0448577	0.999464	-3.76531
EYZxSf3hd4ffoCJLVo	PAAF1	proteasomal ATPase associated factor 1	0.0632449	0.0369352	2.04366	0.0448817	0.999464	-3.76567
KrrjCKJbeu7SrRgVvE	SUN1	Sad1 and UNC84 domain containing 1	-0.0792176	-0.019405	-2.04338	0.0449101	0.999464	-3.7661
ZW0V.L_fgfywFF58qE	PPIC	peptidylprolyl isomerase C	-0.158926	-0.0873227	-2.04312	0.0449366	0.999464	-3.76651
3lF65fLX6nqoqpUV8A	DUSP15	dual specificity phosphatase 15	0.181574	-0.010149	2.0428	0.0449697	0.999464	-3.76701
61OpHrdLrqAbXLSgig	CRY1	cryptochrome circadian regulator 1	-0.131995	0.0482417	-2.04183	0.0450684	0.999464	-3.76851
KH31Nd6A0nusCyXgJQ	ARL17B	ADP ribosylation factor like GTPase 17B	-0.105596	-0.0249867	-2.04182	0.0450699	0.999464	-3.76853
Qu_z0gAaoio58PpXpk	POLA1	DNA polymerase alpha 1, catalytic subunit	0.0735482	0.00361803	2.03926	0.0453318	0.999464	-3.77249
oxhxplegXRNBmSNOSc	SOD2	superoxide dismutase 2	0.12758	0.0277742	2.03782	0.0454794	0.999464	-3.77471
EgOz7_J0ApWFFVfank	CBX4	chromobox 4	-0.108402	-0.0350358	-2.03683	0.045581	0.999464	-3.77623
Wnte91N1P31TnsFUp0	PATL1	PAT1 homolog 1, processing body mRNA decay factor	-0.0774389	-0.0335888	-2.03533	0.0457361	0.999464	-3.77855
izF53O6ueTnKAsqeqk	C1orf74	chromosome 1 open reading frame 74	0.115987	0.0135758	2.03524	0.0457455	0.999464	-3.77869
QoxUVUQORUIhCU.ExI	ARV1	ARV1 homolog, fatty acid homeostasis modulator	0.0882337	0.0118494	2.03482	0.0457887	0.999464	-3.77933
ZV4mZ5W1U3wwIU5Xmc	PTH2	parathyroid hormone 2	0.226629	-0.0188227	2.03403	0.0458711	0.999464	-3.78056
3STd_L5eTS7ooLu0S4	GDAP2	ganglioside induced differentiation associated protein 2	-0.0878089	-0.00998932	-2.03373	0.0459022	0.999464	-3.78102
uSfI6ingbjh6cRBIjk	CEBPZ	CCAAT/enhancer binding protein zeta	-0.0878465	0.00418399	-2.03372	0.0459027	0.999464	-3.78103
3gRRofXYRTQiQXoSJU	IDH2	isocitrate dehydrogenase (NADP(+)) 2, mitochondrial	0.086951	-0.0505014	2.03371	0.0459033	0.999464	-3.78104
T.1KCViVKF76SL5Srw	SOX18	SRY-box 18	-0.197334	0.00639836	-2.03071	0.0462154	0.999464	-3.78566
BV9KdE5EoOcTjpSefU	GABARAPL1	GABA type A receptor associated protein like 1	0.132526	0.0383732	2.02994	0.0462956	0.999464	-3.78685
WrRKgtEgSwxnJKpOqQ	FAM86JP	family with sequence similarity 86, member A pseudogene	-0.114851	-0.0358619	-2.02852	0.0464449	0.999464	-3.78904
lh7AVE8KAUcat6S5u0	PAPD7	poly(A) RNA polymerase D7, non-canonical	-0.0891419	-0.0494599	-2.02806	0.046493	0.999464	-3.78975
iW7u1L8Sbd5Vcm7.uE	ADARB1	adenosine deaminase, RNA specific B1	-0.229791	-0.0856823	-2.0279	0.0465097	0.999464	-3.78999
KTqv.epSX8gR7yrExk	UBE3A	ubiquitin protein ligase E3A	0.0970876	0.0158996	2.0276	0.0465408	0.999464	-3.79045
3n0prAUEnRAogIkcUo	KTN1	kinectin 1	-0.081993	-0.0167699	-2.02528	0.046785	0.999464	-3.79402
NtFgC55qME1Ck0UBaU	HIST1H4B	histone cluster 1 H4 family member b	0.172406	0.0356224	2.02525	0.046788	0.999464	-3.79406
BmAPaUq92d_27e9AWk	RPS29	ribosomal protein S29	0.0831037	-0.00641286	2.02306	0.0470194	0.999464	-3.79743
6ecW_k_SBaAXVQRM9E	LGALS17A	galectin 14 pseudogene	-0.181215	-0.0181256	-2.02286	0.0470407	0.999464	-3.79773
Eq3gjglX3qijwC4460	NUCKS1	nuclear casein kinase and cyclin dependent kinase substrate 1	-0.298782	0.0211055	-2.02229	0.0471007	0.999464	-3.7986
ul7aeqSIeAx5RcX_k8	EME1	essential meiotic structure-specific endonuclease 1	-0.102864	0.00834138	-2.02224	0.0471065	0.999464	-3.79869
oSnepR9xM1RMqc9QXo	CCDC112	coiled-coil domain containing 112	-0.1401	0.00684902	-2.02218	0.0471127	0.999464	-3.79878
fno46Qa60PWors7qgo	TRIM9	tripartite motif containing 9	0.151293	0.0142365	2.02215	0.0471159	0.999464	-3.79882
ltEuXyC6SK4q0CBqtU	ZNF219	zinc finger protein 219	-0.147191	-0.0204001	-2.02175	0.0471587	0.999464	-3.79944
KkeXS301ARf1f5XiF0	CSRP1	cysteine and glycine rich protein 1	0.0863986	0.00578864	2.02036	0.0473061	0.999464	-3.80157
3LV.UQb6AwJ6l27eZc	SNORA73A	small nucleolar RNA, H/ACA box 73A	0.146887	0.035339	2.02026	0.0473169	0.999464	-3.80172
Qpc.6G7ijujorjgBRU	SLC6A4	solute carrier family 6 member 4	-0.123481	0.00683379	-2.02016	0.0473276	0.999464	-3.80188
cvKKId_O0X0s34CatU	CUL4B	cullin 4B	0.102837	0.032957	2.01982	0.0473636	0.999464	-3.8024
BH70tH4jgOfqsn.U10	NUDT21	nudix hydrolase 21	0.0940077	0.0268147	2.01935	0.0474132	0.999464	-3.80311
ontXUcSAXRIESQKMLk	CAST	calpastatin	-0.0950752	0.0125248	-2.01547	0.0478285	0.999464	-3.80905
0pVp4r_gKDQgGkiIeI	TSR3	TSR3, acp transferase ribosome maturation factor	0.0872509	0.0357894	2.01486	0.0478947	0.999464	-3.80999
lmknhIDM663d5KovUk	OSCP1	organic solute carrier partner 1	0.214058	-0.0994497	2.01404	0.0479822	0.999464	-3.81124
iDieCZbqCKkxouu1O4	ACAA1	acetyl-CoA acyltransferase 1	0.0762717	0.0312726	2.01362	0.0480282	0.999464	-3.81189
BGFc8d70VyJIYGkqCE	ZNF2	zinc finger protein 2	-0.0837147	0.00929013	-2.01356	0.0480341	0.999464	-3.81197
6Lyzpd78C6eqUAwqOI	UVRAG	UV radiation resistance associated	-0.166392	-0.00733168	-2.01328	0.0480646	0.999464	-3.8124
ZYQu0orjQenYWAUjpI	HSPA2	heat shock protein family A (Hsp70) member 2	0.1857	0.0533727	2.01289	0.0481063	0.999464	-3.813
0Vd7ItOYHEv6B_ofJU	ELMOD2	ELMO domain containing 2	-0.11262	-0.0138535	-2.01193	0.0482103	0.999464	-3.81447
ctRKfX7CQtJJEnHRnk	SCMH1	Scm polycomb group protein homolog 1	0.0861783	-0.0147877	2.01161	0.0482446	0.999464	-3.81495
ZO60RULRIDAAeH8WeQ	PRDM1	PR/SET domain 1	-0.141999	0.00719011	-2.01105	0.0483054	0.999464	-3.81581
EKpqtVJH7xARGORfB0	GIGYF1	GRB10 interacting GYF protein 1	0.168694	-0.0304301	2.01051	0.0483643	0.999464	-3.81664
c_iDsNZjkvFxGiRlAY	HIST1H4L	histone cluster 1 H4 family member l	-0.211799	-0.0455391	-2.00971	0.048451	0.999464	-3.81786
fIcGCAciHjNiT3lRdk	CACNB2	calcium voltage-gated channel auxiliary subunit beta 2	-0.150239	0.00217405	-2.00958	0.0484653	0.999464	-3.81806
QU74qnU9UPXq0K4PBU	PHF20	PHD finger protein 20	-0.106543	-0.00988528	-2.00944	0.04848	0.999464	-3.81826
lS.0sOLoSwuuneSOlU	DIS3L	DIS3 like exosome 3'-5' exoribonuclease	0.0815554	0.0360978	2.00914	0.0485125	0.999464	-3.81872
9xl9JiBXeVEuiPlNaA	SMARCB1	SWI/SNF related, matrix associated, actin dependent regulator of chromatin, subfamily b, member 1	0.0999017	0.00999115	2.00854	0.048578	0.999464	-3.81964
Zwvp0Jat6XhKuS0RSg	PGP	phosphoglycolate phosphatase	0.141086	0.00578016	2.00709	0.0487361	0.999464	-3.82185
feJX9UTtynUO3XsrUU	CDS2	CDP-diacylglycerol synthase 2	0.0695882	-0.00106241	2.00653	0.0487973	0.999464	-3.8227
6ngUKB5WDueBChP590	H2AFV	H2A histone family member V	0.128145	0.0146274	2.00631	0.0488214	0.999464	-3.82304
HRe5_O0n0HmGIlx6XU	WDR13	WD repeat domain 13	-0.0928386	-0.0245825	-2.00479	0.0489884	0.999464	-3.82536
0ddILSZKCJef6EaiAI	CYB5A	cytochrome b5 type A	-0.0760748	0.00301375	-2.00457	0.0490115	0.999464	-3.82568
uSUg6gOcPSddSklQ6o	CFH	complement factor H	0.15638	0.0131024	2.00387	0.0490894	0.999464	-3.82676
cnkCc4zAed_S1AqMXg	DAPP1	dual adaptor of phosphotyrosine and 3-phosphoinositides 1	-0.117881	0.0191924	-2.00309	0.0491742	0.999464	-3.82794
fJ9X3EjHlIjnq5ICKo	UTS2	urotensin 2	-0.203229	-0.0704546	-2.00265	0.0492235	0.999464	-3.82862
lvk.TqXqr9ckijPolU	VAV3	vav guanine nucleotide exchange factor 3	-0.159577	-0.0165393	-2.00212	0.0492814	0.999464	-3.82942
oaSUsoBJJckEV0Xn0g	TEN1	TEN1, CST complex subunit	0.112167	-0.00612734	2.00017	0.0494963	0.999464	-3.83238
TDqner15e6Xt7XXVw8	GJC2	gap junction protein gamma 2	-0.155364	-0.066152	-1.99587	0.0499742	0.999464	-3.83891
fBKbdP_0L3yW9L_0qk	SHE	Src homology 2 domain containing E	0.175209	-0.00164697	1.99568	0.049995	0.999464	-3.83919
i9GC.vTSHXuQf1Q7pc	VCAM1	vascular cell adhesion molecule 1	-0.14536	-0.015229	-1.99421	0.0501597	0.999464	-3.84143
N7VH13O1f1_u3u3uqU	SLC2A11	solute carrier family 2 member 11	-0.135617	0.00517383	-1.99318	0.0502747	0.999464	-3.84298
QTTvpSjrdjdeF_41l4	TP53BP2	tumor protein p53 binding protein 2	0.193769	0.0369747	1.99313	0.0502811	0.999464	-3.84307
EhJFdGgUuuOkfdAx6U	PPP2R5C	protein phosphatase 2 regulatory subunit B'gamma	0.070097	0.0163521	1.99302	0.050293	0.999464	-3.84323
opeKpk_0MCRJ6eIeQA	RPL35	ribosomal protein L35	0.0784088	0.0218697	1.9921	0.0503969	0.999464	-3.84463
rS7tfgXh4ye.wiUel4	FAM96A	family with sequence similarity 96 member A	0.0571001	0.00449694	1.99179	0.0504317	0.999464	-3.8451
xnkEUS.NPoXoquuBcE	GABPB1	GA binding protein transcription factor beta subunit 1	0.110096	-0.00498273	1.99095	0.0505255	0.999464	-3.84636
0iEd5d66eSJDFQl0.o	FYCO1	FYVE and coiled-coil domain containing 1	-0.108057	-0.0613437	-1.98926	0.0507168	0.999464	-3.84893
Q1KErrPJ1Ht8EyxukY	PIN4	peptidylprolyl cis/trans isomerase, NIMA-interacting 4	0.126812	0.00502843	1.98893	0.0507532	0.999464	-3.84942
94JrR13S6AiRijvdJ0	ZNF510	zinc finger protein 510	-0.15198	-0.0608761	-1.98796	0.0508637	0.999464	-3.85089
9clRqoVI3THQSCiHSI	LILRB5	leukocyte immunoglobulin like receptor B5	0.186237	-0.00879617	1.98773	0.0508893	0.999464	-3.85123
iukKCAu9Yk2uncGUEk	SSFA2	sperm specific antigen 2	-0.119915	0.0880662	-1.98759	0.0509054	0.999464	-3.85145
uQq5OtQ73SKTq65.7k	SLC25A5	solute carrier family 25 member 5	0.0506294	-0.00538447	1.98755	0.0509098	0.999464	-3.85151
K.XUXnq3eeF_eoEd4o	GNGT2	G protein subunit gamma transducin 2	0.0920402	0.00982372	1.98739	0.0509279	0.999464	-3.85175
WHDqghEijii9Rqejgk	VPS25	vacuolar protein sorting 25 homolog	0.141002	-0.0560135	1.9872	0.0509495	0.999464	-3.85204
xA4dV3ldlWZ3nFP18Y	DUT	deoxyuridine triphosphatase	0.0995805	0.0172707	1.98711	0.0509594	0.999464	-3.85217
ZXPwrCVAlR.6P92HtY	ADCY1	adenylate cyclase 1	0.180039	-0.00854949	1.98658	0.0510192	0.999464	-3.85297
r4oXvVYpQkgGn5Qt1I	PPAN	peter pan homolog (Drosophila)	0.0935106	-0.00496699	1.98618	0.0510655	0.999464	-3.85358
Kv6jfd1RUR83VUqUdQ	CES4A	carboxylesterase 4A	-0.13598	-0.0288074	-1.98513	0.0511846	0.999464	-3.85516
cjrtVJVUoxO0jQiihM	ZC3H14	zinc finger CCCH-type containing 14	-0.158308	-0.0418905	-1.98444	0.0512635	0.999464	-3.85621
Kf7KZTSUf8glNJS7vo	ARHGEF3	Rho guanine nucleotide exchange factor 3	0.0775049	-0.0322187	1.98424	0.051286	0.999464	-3.85651
0lsEgje4Io66.kXvXg	GXYLT1	glucoside xylosyltransferase 1	-0.0938724	0.0484099	-1.98264	0.0514686	0.999464	-3.85892
uCCHYnlKgphYYjDZfY	G3BP1	G3BP stress granule assembly factor 1	0.0996846	-0.00945231	1.98208	0.0515327	0.999464	-3.85976
9V4FXx8XpfFxN3iVSU	USP51	ubiquitin specific peptidase 51	0.160862	0.0264396	1.98092	0.0516661	0.999464	-3.86152
WB9gp8OO0U.cXlGzaY	PMS2P5	PMS1 homolog 2, mismatch repair system component pseudogene 5	0.0959957	0.0331933	1.9809	0.0516685	0.999464	-3.86155
QRUS9J6e_P9HkHeX_4	RIOK1	RIO kinase 1	-0.0737831	0.00444858	-1.98063	0.0516989	0.999464	-3.86195
BlKOCoh6kId8ZVEeQ8	PLPP1	phospholipid phosphatase 1	-0.118816	-0.012775	-1.9805	0.0517143	0.999464	-3.86215
TqIzIo.46GFuzL_Vek	RFESD	Rieske Fe-S domain containing	0.103808	-0.0063826	1.98044	0.0517207	0.999464	-3.86223
oXoQS2tg4KQHYJXRI4	ANP32C	acidic nuclear phosphoprotein 32 family member C	-0.0913874	0.0167692	-1.97488	0.0523632	0.999464	-3.8706
KkrsSIikgsewouigig	PSMC3IP	PSMC3 interacting protein	0.12881	0.0251169	1.97407	0.0524572	0.999464	-3.87182
ifiI4kUvEQoffzWJno	INPP4B	inositol polyphosphate-4-phosphatase type II B	-0.14081	0.0403246	-1.97319	0.0525599	0.999464	-3.87315
iJaLrMN8aLVaUh.aXI	RPRD2	regulation of nuclear pre-mRNA domain containing 2	0.148764	-0.00424577	1.97281	0.0526032	0.999464	-3.8737
uEFBIHqvVBU2dJJZ9I	HNRNPR	heterogeneous nuclear ribonucleoprotein R	-0.077529	0.00951442	-1.97254	0.0526346	0.999464	-3.87411
ThMpCe5J.E.wUqh3uk	CREBRF	CREB3 regulatory factor	-0.142484	-0.0472819	-1.97165	0.0527393	0.999464	-3.87546
xknVChEJ76jnH3SfRk	HIRIP3	HIRA interacting protein 3	-0.063089	0.016434	-1.97141	0.0527676	0.999464	-3.87582
xniZB5VN4UeHQMYHn4	WDR41	WD repeat domain 41	0.0654765	0.00584633	1.9713	0.0527794	0.999464	-3.87597
ig3Xne4Oc0hVApQX6k	SLC39A11	solute carrier family 39 member 11	0.0852221	-0.0252971	1.97126	0.0527851	0.999464	-3.87604
6nmuUqFyZKH.rDUwDo	GOSR2	golgi SNAP receptor complex member 2	0.192706	0.0455432	1.97093	0.0528229	0.999464	-3.87653
xXfVRXtXsgBS4JKxok	ARHGEF11	Rho guanine nucleotide exchange factor 11	-0.142789	-0.0924829	-1.97079	0.0528397	0.999464	-3.87674
ERAvJ6t65d7r1J10so	L2HGDH	L-2-hydroxyglutarate dehydrogenase	0.0963135	0.000369344	1.97013	0.0529172	0.999464	-3.87774
ryiHh7i56cAlerrinQ	SCYL3	SCY1 like pseudokinase 3	-0.0877576	-0.0166021	-1.96934	0.0530095	0.999464	-3.87892
ZoigEiF7I6OPPeV6h0	GON4L	gon-4 like	-0.0705469	0.0204995	-1.96808	0.0531579	0.999464	-3.88081
Zp8s2d.95qnHeCx4fk	SIK2	salt inducible kinase 2	-0.162921	0.0243269	-1.96786	0.0531835	0.999464	-3.88114
iH9zOaWgSrr4TS.30o	ACKR2	atypical chemokine receptor 2	0.185906	0.044436	1.96775	0.0531967	0.999464	-3.88131
QrjxXuzCLO7dHkX0Ok	RAP1A	RAP1A, member of RAS oncogene family	0.104548	0.0347684	1.96684	0.0533028	0.999464	-3.88266
fuxTCUEFnh1KPkwlV4	ASH2L	ASH2 like histone lysine methyltransferase complex subunit	0.0615559	0.00761517	1.96673	0.0533164	0.999464	-3.88283
K_L4CwEQnp59XukHuk	PTPRO	protein tyrosine phosphatase, receptor type O	-0.150947	-0.0336651	-1.96603	0.0533991	0.999464	-3.88388
9J5ZuBOCh_peqfkojU	CTU2	cytosolic thiouridylase subunit 2	-0.132956	-0.00865333	-1.96597	0.0534063	0.999464	-3.88397
lqXVe7h3F5He78zXuU	NIPAL4	NIPA like domain containing 4	-0.198193	0.0562116	-1.9655	0.0534613	0.999464	-3.88467
ZRF7LVJx6op4pKIOuw	PDCD7	programmed cell death 7	-0.090875	0.0136709	-1.96519	0.0534978	0.999464	-3.88513
igFXtVLSIwTUHB1IJo	EXO1	exonuclease 1	0.079381	0.0318559	1.96505	0.053515	0.999464	-3.88535
6V_yuETneV3iktJgpA	ISCA1	iron-sulfur cluster assembly 1	-0.0887301	0.00538725	-1.9637	0.0536745	0.999464	-3.88736
lLkJVIh77K_f.fXXqQ	CKAP2L	cytoskeleton associated protein 2 like	0.0797192	0.0208927	1.96347	0.053702	0.999464	-3.88771
3V0Xf4B3obPzp1F1UU	SCAF1	SR-related CTD associated factor 1	0.131218	0.00620477	1.9619	0.0538884	0.999464	-3.89005
ZofWqw4S44DkqhevlU	SNHG12	small nucleolar RNA host gene 12	-0.160784	-0.0349501	-1.96175	0.0539062	0.999464	-3.89028
rF7ol3er4KJK0Q47oE	ABHD17B	abhydrolase domain containing 17B	-0.0921628	-0.0269408	-1.96117	0.0539757	0.999464	-3.89115
BSu4lFuVpQsA7.8A68	PPID	peptidylprolyl isomerase D	0.240941	0.00895953	1.96086	0.0540128	0.999464	-3.89161
idSZRxRXiu1AllJtNA	NOC4L	nucleolar complex associated 4 homolog	0.112716	-0.000621262	1.96017	0.0540946	0.999464	-3.89264
3qmr67v9V_7FIkT18o	CTDP1	CTD phosphatase subunit 1	-0.120543	0.0202362	-1.95813	0.0543387	0.999464	-3.89569
ltUElOBTkfOjFSX.Kk	ZFP90	ZFP90 zinc finger protein	0.0793111	0.0177281	1.95734	0.0544335	0.999464	-3.89686
E9srjpeTvsHFW1Z6nQ	PGS1	phosphatidylglycerophosphate synthase 1	-0.0735742	-0.000581986	-1.95716	0.0544551	0.999464	-3.89713
rnkulnV6lsoDiYwY4Q	MAX	MYC associated factor X	0.119387	0.00622596	1.95532	0.0546754	0.999464	-3.89986
6HlFLVSeSF9NV9N1Rw	NEDD4	neural precursor cell expressed, developmentally down-regulated 4, E3 ubiquitin protein ligase	-0.120924	0.00329873	-1.95475	0.0547451	0.999464	-3.90073
QtXIUf7OFv5LeJKUqk	LBH	limb bud and heart development	0.0995837	-0.0338301	1.95442	0.0547839	0.999464	-3.9012
xuBm5ckgidWRNTl.gQ	BOLA2	bolA family member 2	0.0629158	-0.0176733	1.95417	0.0548146	0.999464	-3.90158
315T_ecDep60g55JjE	CREBRF	CREB3 regulatory factor	-0.16854	-0.0377208	-1.95174	0.0551081	0.999464	-3.90519
6kx5Ux3AM1UndEUV_8	RBAK	RB associated KRAB zinc finger	-0.135165	-0.0238537	-1.95104	0.0551941	0.999464	-3.90625
NUvQdJAR9eJF5xOUpA	STXBP4	syntaxin binding protein 4	-0.173224	-0.0597847	-1.95017	0.0552996	0.999464	-3.90754
cR54BdIgQ7KE5q5KyI	LOC401463	uncharacterized LOC401463	0.182404	0.074516	1.94993	0.0553287	0.999464	-3.9079
rXUIvGLwoIuUVfilXg	RIPK3	receptor interacting serine/threonine kinase 3	0.0930559	0.00195145	1.9499	0.0553316	0.999464	-3.90793
0_FepinhRBRzoxWR10	PLPP2	phospholipid phosphatase 2	0.171128	-0.0220435	1.94874	0.0554729	0.999464	-3.90965
6XB_cI5yssYV3o.oKQ	SMARCAD1	SWI/SNF-related, matrix-associated actin-dependent regulator of chromatin, subfamily a, containing DEAD/H box 1	0.0696746	0.00798578	1.94851	0.0555015	0.999464	-3.91
0meR92tN6oxH12HgSI	SESTD1	SEC14 and spectrin domain containing 1	-0.116039	-0.0117105	-1.94787	0.0555791	0.999464	-3.91095
iURFSiCujC6nFCp9eQ	C19orf48	chromosome 19 open reading frame 48	0.111887	0.0316684	1.94781	0.0555863	0.999464	-3.91104
oueo8Su4lFedBSv888	UTP20	UTP20, small subunit processome component	0.127039	-0.073523	1.94758	0.0556154	0.999464	-3.91139
QGoxc2iQJcUu5J6QKI	VWA8	von Willebrand factor A domain containing 8	-0.10865	0.0122656	-1.9475	0.0556251	0.999464	-3.91151
ZnOgng5aGckS.H.1f0	VBP1	VHL binding protein 1	-0.0647413	0.0381016	-1.94717	0.0556652	0.999464	-3.91199
Eq_2.6AspQSANceREk	MAP4K5	mitogen-activated protein kinase kinase kinase kinase 5	-0.128446	0.0311404	-1.94637	0.0557631	0.999464	-3.91318
idIHs_6NWi.VUDU3E0	MSANTD2	Myb/SANT DNA binding domain containing 2	-0.0978485	-0.0190802	-1.94609	0.0557975	0.999464	-3.9136
x8exISAAeI7JV3XoLk	SLC25A13	solute carrier family 25 member 13	-0.0726489	-0.0328896	-1.94588	0.0558232	0.999464	-3.91391
TUCU6iq7XXSFOVUjj8	BTBD2	BTB domain containing 2	0.0648633	-0.00229554	1.94552	0.0558674	0.999464	-3.91444
QrpKl4eeaKXaQz4.yE	PEMT	phosphatidylethanolamine N-methyltransferase	0.161078	0.000871779	1.94481	0.0559544	0.999464	-3.91549
rlfSx68koIDtcQCGLc	PIGH	phosphatidylinositol glycan anchor biosynthesis class H	0.0864912	-0.0511219	1.94473	0.0559637	0.999464	-3.91561
Zzkrh7v4XVITzYnpZU	ASMTL	acetylserotonin O-methyltransferase like	0.119531	0.0138068	1.94458	0.0559826	0.999464	-3.91583
BoO4.pLSrHCTq6gdeU	UBIAD1	UbiA prenyltransferase domain containing 1	0.0816767	0.0235371	1.9445	0.055993	0.999464	-3.91596
31LIK5Uh9T8.pd9F4o	RDH14	retinol dehydrogenase 14 (all-trans/9-cis/11-cis)	-0.0892372	-0.0143183	-1.94357	0.0561071	0.999464	-3.91733
ZlToS17t6OKKHS56SM	SDSL	serine dehydratase like	-0.127055	0.0274815	-1.94341	0.0561262	0.999464	-3.91756
ukrjIIkBRtUYNUMOEk	MAPKAPK5	mitogen-activated protein kinase-activated protein kinase 5	-0.0569711	-0.0148993	-1.94294	0.0561845	0.999464	-3.91827
66Ekq73SdUmCXUQSDo	TTYH2	tweety family member 2	0.208918	-0.0368858	1.9413	0.0563872	0.999464	-3.9207
K66dEXsNHkdQXpBIuI	NA	NA	0.164222	0.00795232	1.94013	0.0565316	0.999464	-3.92242
3oV5wB3qBlXu12DoI4	WDR20	WD repeat domain 20	0.105584	0.0170959	1.9401	0.0565353	0.999464	-3.92247
Qeh9al2P31kQl4W6P0	ADAT3	adenosine deaminase, tRNA specific 3	-0.13055	0.00339692	-1.93946	0.0566145	0.999464	-3.92341
9ggoSbLpEQpACUV4rk	ZFP91	ZFP91 zinc finger protein	-0.11183	0.0292936	-1.93939	0.0566238	0.999464	-3.92352
9qzqR7kCHUye5cotyg	ELL3	elongation factor for RNA polymerase II 3	0.116541	-0.0376411	1.93837	0.0567499	0.999464	-3.92503
cfP36eXrrlXq7TJU_c	OPN3	opsin 3	0.130839	0.0387462	1.93832	0.056756	0.999464	-3.9251
Wt4zAE5RKIPao.i.d4	PERP	PERP, TP53 apoptosis effector	0.169027	-0.0122962	1.93788	0.0568114	0.999464	-3.92576
6dJUitVe1CarPUUpTM	OPA3	OPA3, outer mitochondrial membrane lipid metabolism regulator	0.12152	0.0674525	1.93764	0.0568417	0.999464	-3.92612
6SgeqFCJdUPlcHXtPo	ARMC8	armadillo repeat containing 8	0.137869	-0.0212722	1.93657	0.0569744	0.999464	-3.92769
l1ehjiXqoikiHCOe1Q	TSFM	Ts translation elongation factor, mitochondrial	0.112349	0.0304702	1.93504	0.0571654	0.999464	-3.92995
fIDoOelV6N5E3l2ees	MRM2	mitochondrial rRNA methyltransferase 2	0.164837	0.00803191	1.93449	0.0572339	0.999464	-3.93076
KeImOqcz4N3s5HiB4k	AK4	adenylate kinase 4	-0.16241	-0.0396142	-1.93438	0.0572477	0.999464	-3.93092
KBNdel3vq0u_ql5_qA	IFI27L2	interferon alpha inducible protein 27 like 2	0.0812156	-0.00107105	1.93367	0.0573377	0.999464	-3.93198
EUUt2eQ0K_7dSCQGIQ	CUZD1	CUB and zona pellucida like domains 1	-0.162376	0.00739261	-1.93308	0.0574107	0.999464	-3.93284
NJ7096Q4.pBLmrrXYk	DUSP8	dual specificity phosphatase 8	-0.174879	0.0142842	-1.93279	0.0574481	0.999464	-3.93328
T_S67nrj.kS4neaCq0	POLD3	DNA polymerase delta 3, accessory subunit	0.0920256	0.00611668	1.93262	0.0574688	0.999464	-3.93352
oMCiUJF9q2SVEF0Xo0	UGT2B17	UDP glucuronosyltransferase family 2 member B17	-0.0745686	0.0286455	-1.93225	0.0575156	0.999464	-3.93407
ubTI7Ez7trKnOKTvEo	NBEA	neurobeachin	-0.149878	-0.0671431	-1.93117	0.0576516	0.999464	-3.93566
oowjQ5XTwJJa7A74l8	RPLP1	ribosomal protein lateral stalk subunit P1	0.0664242	-0.00248146	1.93072	0.0577081	0.999464	-3.93632
KoNAKkuv0TSYRE7kJ4	USP16	ubiquitin specific peptidase 16	-0.063816	0.0177007	-1.93064	0.0577185	0.999464	-3.93644
inkrerL6NOnUeo_q6A	RNF41	ring finger protein 41	0.0819719	0.0107244	1.92925	0.0578933	0.999464	-3.93848
upAvCfjjrwDa.jJFOo	TDP2	tyrosyl-DNA phosphodiesterase 2	-0.142945	-0.0255212	-1.92896	0.0579301	0.999464	-3.93891
6uiCI1cM5deA5J8K14	GLMN	glomulin, FKBP associated protein	-0.0831056	0.00823139	-1.92822	0.0580238	0.999464	-3.94
3TUqI_5JJ02OLFOaUQ	TUBG1	tubulin gamma 1	0.113908	-0.016395	1.92761	0.058101	0.999464	-3.9409
Tz3T_web9atmUi0.rE	BRPF1	bromodomain and PHD finger containing 1	-0.0713927	-0.00514858	-1.9274	0.0581277	0.999464	-3.94121
0W6nuULuVKju.kCoTc	MT1IP	metallothionein 1I, pseudogene	0.145485	0.0319325	1.92689	0.0581934	0.999464	-3.94197
Z3tHSez0beJL3ksEXk	MFF	mitochondrial fission factor	-0.0765396	0.025735	-1.92631	0.058267	0.999464	-3.94282
QjpTeSFCCQldBIHg3E	DDX60L	DExD/H-box 60 like	0.118693	-0.0652729	1.92625	0.0582746	0.999464	-3.94291
WSeum6H2OIXgrkkQm4	PAXX	PAXX, non-homologous end joining factor	0.0817172	0.0034498	1.92602	0.0583037	0.999464	-3.94324
ouS1E7kwoU6on7P6g8	NSUN4	NOP2/Sun RNA methyltransferase family member 4	-0.0724862	0.0330305	-1.92523	0.0584043	0.999464	-3.94441
rPedae6aulaNNDqPNM	HVCN1	hydrogen voltage gated channel 1	0.0818122	-0.0526744	1.92519	0.0584088	0.999464	-3.94446
xJV.X6euOCISLtIslU	TRPT1	tRNA phosphotransferase 1	-0.0642712	-0.0218258	-1.92344	0.0586318	0.999464	-3.94703
9MLpPJDXUpFXYjhpic	SSBP3	single stranded DNA binding protein 3	0.107379	0.0416572	1.92339	0.0586389	0.999464	-3.94711
0qDlJ15NFQSIkSeOkA	PRR32	proline rich 32	0.127972	0.0336465	1.92262	0.0587378	0.999464	-3.94824
NEt5N8yS5f7dKl3npI	TRIM68	tripartite motif containing 68	0.073198	0.0229932	1.92258	0.0587422	0.999464	-3.94829
BqGLTk14BDgRC6E4.Y	SERPINI1	serpin family I member 1	0.150795	-0.0188051	1.92235	0.0587714	0.999464	-3.94863
K1U7EnOFSeKB5OKeJI	SMIM29	small integral membrane protein 29	0.123489	-0.0314669	1.92177	0.058846	0.999464	-3.94948
uiXrhEuRAggCa0AXBE	PAK1IP1	PAK1 interacting protein 1	-0.103142	-0.0286151	-1.92176	0.0588477	0.999464	-3.9495
iVVBLu2Lf5AgF.I7r0	RGMB	repulsive guidance molecule family member b	-0.128075	0.0612088	-1.92174	0.0588501	0.999464	-3.94953
r6q6edenDnzyAO121U	RBKS	ribokinase	-0.119937	-0.0665265	-1.91971	0.0591112	0.999464	-3.95251
xpOSfuuLHvcoelADqQ	RUNDC1	RUN domain containing 1	-0.0802959	-0.0194237	-1.9187	0.0592407	0.999464	-3.95398
3eooU6i470Zd4S4DGY	EIF3F	eukaryotic translation initiation factor 3 subunit F	0.075082	0.0399211	1.91836	0.0592847	0.999464	-3.95448
Ht7_kVR54Ul1SIC7kE	HSD17B10	hydroxysteroid 17-beta dehydrogenase 10	0.0904692	0.0314961	1.9181	0.0593188	0.999464	-3.95487
i3KQV.9TCgiToue60U	SH3BP5	SH3 domain binding protein 5	-0.142547	-0.00525042	-1.91784	0.0593526	0.999464	-3.95525
Wfov7E6h8kFEeLisAk	ARL13B	ADP ribosylation factor like GTPase 13B	-0.123428	-0.00618909	-1.91779	0.0593581	0.999464	-3.95532
uJEnKJd4T7eu.xut70	PTBP3	polypyrimidine tract binding protein 3	0.0640042	0.00660223	1.91652	0.059523	0.999464	-3.95718
uRSc_Xk3qA_eDZEktM	JMJD1C	jumonji domain containing 1C	-0.0727928	0.00478246	-1.91589	0.0596041	0.999464	-3.9581
0ofRQkgMVokZTUQrnk	MCM5	minichromosome maintenance complex component 5	0.0889108	0.0505706	1.91511	0.0597055	0.999464	-3.95925
0lzjRfk6EkNewE0SLo	KLHDC2	kelch domain containing 2	-0.0664264	0.0329576	-1.91367	0.059892	0.999464	-3.96134
f1d0LUk6OqA7d6NVEk	AGO1	argonaute 1, RISC catalytic component	0.0889331	0.000974024	1.91301	0.0599788	0.999464	-3.96232
l5.deQLR2Arh6aK4p4	C22orf34	chromosome 22 open reading frame 34	-0.164208	-0.0780387	-1.91285	0.06	0.999464	-3.96256
xt.it_o4NIDc1Kc31I	FTH1	ferritin heavy chain 1	-0.083034	0.0225134	-1.91201	0.0601091	0.999464	-3.96378
BHuFy1VTSlEeeUXdEY	SCAMP3	secretory carrier membrane protein 3	-0.0630387	-0.000595466	-1.91019	0.0603472	0.999464	-3.96644
r2UV0U1Ck1r_KEOk3E	CD79B	CD79b molecule	0.101413	-0.019125	1.90989	0.0603864	0.999464	-3.96687
cAoqNe1Cl5jxNai_ZQ	USF2	upstream transcription factor 2, c-fos interacting	0.0798456	-0.037275	1.90893	0.0605121	0.999464	-3.96827
cFyPXA4eTKEjVN11FQ	KMO	kynurenine 3-monooxygenase	-0.105657	-0.0330247	-1.90881	0.0605282	0.999464	-3.96845
9Su4lFGXpYC8vv_B08	COX16	COX16, cytochrome c oxidase assembly homolog	0.180497	-0.00244063	1.90878	0.0605325	0.999464	-3.9685
cSSDdKTNdJQUgHpLpI	RWDD3	RWD domain containing 3	0.101282	0.0192649	1.90843	0.0605777	0.999464	-3.969
6p5DKN7p.oRJCtE6Ig	SLC9B2	solute carrier family 9 member B2	0.0765551	0.0299451	1.90739	0.060715	0.999464	-3.97052
HR3OoB30kXF5lVREXc	LPCAT4	lysophosphatidylcholine acyltransferase 4	0.104263	-0.0254155	1.90669	0.0608072	0.999464	-3.97154
TFxV5AN1z1SxJSxe0E	TGM5	transglutaminase 5	0.208663	0.0341101	1.90649	0.0608329	0.999464	-3.97183
Nd63i0H9nqgBc6BceQ	SLC38A1	solute carrier family 38 member 1	-0.0866413	0.0167586	-1.90595	0.0609048	0.999464	-3.97262
Bh95VJ.N7REKepF3Lk	PFKM	phosphofructokinase, muscle	0.0662704	-0.00242115	1.90544	0.060972	0.999464	-3.97336
Ko9d7uro5u6kYf7HSA	HES5	hes family bHLH transcription factor 5	-0.121501	-0.0314579	-1.90463	0.0610796	0.999464	-3.97455
uXMTuqLuoJH0tKXQt0	ZNF234	zinc finger protein 234	-0.112645	-0.000919346	-1.90421	0.0611341	0.999464	-3.97515
WkSBLsV8uFL5xUJPuU	NCKAP1	NCK associated protein 1	-0.167927	-0.0965811	-1.90348	0.061231	0.999464	-3.97621
xnVFMVvIKaen6jEiBE	MDM1	Mdm1 nuclear protein	0.117195	0.0391229	1.90329	0.0612565	0.999464	-3.97649
Q5fWLP11Ij7okjq_zE	NSF	N-ethylmaleimide sensitive factor, vesicle fusing ATPase	-0.133664	-0.0185942	-1.90141	0.0615057	0.999464	-3.97922
iq.jDdUtfLAj4iKeiQ	GOLT1B	golgi transport 1B	0.0895192	0.0482244	1.90083	0.0615838	0.999464	-3.98007
E6k3XigOyThPrHB5O4	RALGAPA1	Ral GTPase activating protein catalytic alpha subunit 1	-0.079856	0.0290683	-1.9007	0.0616014	0.999464	-3.98026
Z1V914NJKjoKKsqC84	TBL1XR1	transducin beta like 1 X-linked receptor 1	0.098418	0.0194903	1.90016	0.0616736	0.999464	-3.98105
NCm3C0pIIiJ59J9Ukk	SCLT1	sodium channel and clathrin linker 1	0.095465	0.0357783	1.90013	0.0616769	0.999464	-3.98109
ZW4o_4iEA4Sk2kCr_k	RBM34	RNA binding motif protein 34	0.0641998	0.0217137	1.9	0.0616943	0.999464	-3.98128
ZNMNXXtUdd3FBVFcck	EDA2R	ectodysplasin A2 receptor	0.126194	0.0162422	1.89953	0.0617574	0.999464	-3.98196
KO51fUnriKKLyJ62.4	IDS	iduronate 2-sulfatase	-0.0727751	-0.0103304	-1.89937	0.0617789	0.999464	-3.9822
ZfYp6V5Skv9Wm.yjew	PLCH2	phospholipase C eta 2	-0.140164	-0.0405853	-1.89899	0.0618294	0.999464	-3.98275
xXt7d1N7_uqsieNSJE	CTSD	cathepsin D	0.125969	0.00645579	1.89868	0.0618713	0.999464	-3.9832
Nhu93rVO3yapOsa.bk	NAXD	NAD(P)HX dehydratase	-0.0772836	0.0230991	-1.89847	0.0618986	0.999464	-3.9835
ol9ui.hDisSkqknZjk	SNRPA	small nuclear ribonucleoprotein polypeptide A	0.0565525	0.014447	1.89744	0.0620369	0.999464	-3.985
ZdnOEuhKFyOKKk4M6s	DNAJC7	DnaJ heat shock protein family (Hsp40) member C7	-0.0891534	0.0305555	-1.89672	0.0621337	0.999464	-3.98604
QTqiwyhSJrN3pFEcqE	PTPRA	protein tyrosine phosphatase, receptor type A	0.0767359	0.00787835	1.8964	0.0621761	0.999464	-3.9865
EhNNVBXag5NeH_tBEo	HSP90AB4P	heat shock protein 90 alpha family class B member 4, pseudogene	-0.190807	-0.0120711	-1.89611	0.0622146	0.999464	-3.98692
foUXXeUkoMCH7k1dAA	ASPSCR1	ASPSCR1, UBX domain containing tether for SLC2A4	0.0757644	0.0146406	1.89551	0.0622958	0.999464	-3.98779
3mkS1R9VN1ULK67yAE	RBM14	RNA binding motif protein 14	0.0682574	0.0210449	1.89434	0.0624531	0.999464	-3.98948
rAlrkp3ntNtKHX7qe4	SERGEF	secretion regulating guanine nucleotide exchange factor	0.0884688	0.0355073	1.89387	0.0625176	0.999464	-3.99018
NS4eJ7XYylOQqfXiL0	LARP6	La ribonucleoprotein domain family member 6	-0.163493	0.0547788	-1.89329	0.0625947	0.999464	-3.991
l46J5A.TpL05La0Ioo	APAF1	apoptotic peptidase activating factor 1	0.14654	0.00155663	1.89326	0.0625997	0.999464	-3.99106
Hd1yqCDNEpwybr6q4I	RAB11FIP1	RAB11 family interacting protein 1	0.105576	-0.0671219	1.89273	0.0626705	0.999464	-3.99182
NXhfbd7kYe8eh0ZJ44	POLRMT	RNA polymerase mitochondrial	0.0867627	0.0280769	1.89204	0.0627638	0.999464	-3.99281
HhoAXsV457MOzvg7rU	RPS6KC1	ribosomal protein S6 kinase C1	-0.102038	-0.0304321	-1.89167	0.0628145	0.999464	-3.99336
u4Pif.lRI9_P7L7_ko	LEPR	leptin receptor	-0.1311	-0.00431834	-1.89068	0.0629484	0.999464	-3.99478
rjjjVI_UmSvoJZM.o0	TBCA	tubulin folding cofactor A	-0.0501976	-0.0163783	-1.88981	0.0630676	0.999464	-3.99605
6GujnvB.fX1XSkOmuE	ZNF585A	zinc finger protein 585A	-0.160884	0.0231228	-1.88965	0.063089	0.999464	-3.99628
Bt_RCUpI0.dcJ4zT6c	TFB2M	transcription factor B2, mitochondrial	-0.0730812	0.014892	-1.8894	0.0631229	0.999464	-3.99664
H_R4iKCoSSi4rgipog	INO80	INO80 complex subunit	0.145135	0.0260044	1.88914	0.0631588	0.999464	-3.99702
xd6UMUiTNJIsoiQo.o	SAMD8	sterile alpha motif domain containing 8	-0.121424	-0.0094059	-1.88894	0.0631858	0.999464	-3.99731
rkP35BRRYpVgCR620o	DMKN	dermokine	-0.16127	-0.0725584	-1.88869	0.0632197	0.999464	-3.99767
0EnXekOzeCqAldeElI	PHF10	PHD finger protein 10	0.107857	0.0103845	1.88671	0.0634903	0.999464	-4.00053
obsJQeIxbjrvj9.Q44	ATP2B1	ATPase plasma membrane Ca2+ transporting 1	-0.0892402	-0.0778227	-1.8863	0.0635451	0.999464	-4.00111
ByNTVMdCnEgexB27oI	IL6ST	interleukin 6 signal transducer	-0.124418	-0.0467988	-1.88572	0.0636255	0.999464	-4.00196
QrxUd7UdUynEgAtEJk	RPL15	ribosomal protein L15	0.0621912	0.0143967	1.88465	0.0637715	0.999464	-4.0035
Tjd.7nq9Lp30qhKA5c	RETSAT	retinol saturase	0.121012	0.0246837	1.88399	0.0638625	0.999464	-4.00445
Hf6qe3VO24.4bjd1uE	NCDN	neurochondrin	0.140905	0.0439383	1.88151	0.0642044	0.999464	-4.00803
HXhS1CUgB417FAn4u0	OIP5	Opa interacting protein 5	0.0789673	0.0684016	1.88118	0.0642496	0.999464	-4.0085
rOiNiu_uhlhXvuhJ3Q	ACOT7	acyl-CoA thioesterase 7	0.0971656	0.0425476	1.88089	0.0642896	0.999464	-4.00892
Hua3qUtEKD7vtwlAqo	PXDN	peroxidasin	-0.248405	-0.114606	-1.87988	0.0644287	0.999464	-4.01037
NvhIBEZiDikjVIkKHo	PPARA	peroxisome proliferator activated receptor alpha	-0.140181	-0.0092176	-1.87935	0.0645031	0.999464	-4.01114
TUP_z3qqKJXd9e6VRc	ATP1A3	ATPase Na+/K+ transporting subunit alpha 3	0.147895	0.0479747	1.87834	0.0646429	0.999464	-4.01259
uAAppoS_lIqOiHrqhk	ZNF579	zinc finger protein 579	-0.123644	-0.0140361	-1.87673	0.0648661	0.999464	-4.0149
NgashCh4j5d4fXXVeo	HDAC3	histone deacetylase 3	-0.065657	0.0135035	-1.87668	0.0648734	0.999464	-4.01497
31UV1P.6M8BKgJ_cTw	ACAP2	ArfGAP with coiled-coil, ankyrin repeat and PH domains 2	0.0751539	0.0146226	1.87628	0.06493	0.999464	-4.01556
lixSAqzqjXL0jEI09U	HOMEZ	homeobox and leucine zipper encoding	0.191116	-0.00671788	1.87577	0.0650003	0.999464	-4.01628
HUp9.q_NUXOI0gzs5I	SNRNP27	small nuclear ribonucleoprotein U4/U6.U5 subunit 27	-0.0518501	-0.00198514	-1.87331	0.065345	0.999464	-4.01982
3puJRZl63M7j9A8rpc	NDUFC2	NADH:ubiquinone oxidoreductase subunit C2	0.147851	-0.0123287	1.87284	0.06541	0.999464	-4.02049
TbdFZLBR4G0NJXU6r0	RALGPS1	Ral GEF with PH domain and SH3 binding motif 1	-0.128311	0.00804031	-1.87278	0.0654181	0.999464	-4.02057
lkllgASgL6gmqsocR4	MELTF	melanotransferrin	0.10735	-0.0117782	1.87231	0.0654844	0.999464	-4.02125
6xBl2p1iR5xhNxadxQ	DPP7	dipeptidyl peptidase 7	0.103115	-0.032358	1.87222	0.0654972	0.999464	-4.02138
rC.3F6nhvl_1oqn5Ks	MYDGF	myeloid derived growth factor	0.100343	-0.0362584	1.8719	0.0655419	0.999464	-4.02184
BKuv5XwggJ76hAhFiU	LGALSL	galectin like	-0.138366	-0.0253245	-1.87186	0.0655471	0.999464	-4.02189
ZN1eUlXBxXVSXUoHNQ	CD3EAP	CD3e molecule associated protein	0.127196	0.0167858	1.87157	0.0655889	0.999464	-4.02232
up5SEFJVZTE95FBDwk	HEATR5B	HEAT repeat containing 5B	-0.0798892	-0.0151915	-1.87083	0.065692	0.999464	-4.02337
6fcKJSKiTr5CFWk1G4	RHPN1	rhophilin Rho GTPase binding protein 1	-0.187465	-0.0352949	-1.87016	0.0657869	0.999464	-4.02433
QlQR6ud31HEiDXggCo	KMT5B	lysine methyltransferase 5B	0.102367	0.0143462	1.87014	0.0657903	0.999464	-4.02437
xXpUsX_v0SCN3lKQpQ	METTL23	methyltransferase like 23	-0.0955373	0.0296863	-1.86965	0.065859	0.999464	-4.02507
cNQpNBdtSkCCeui1eU	MRPL12	mitochondrial ribosomal protein L12	0.0862431	0.0237865	1.86932	0.0659048	0.999464	-4.02553
rrSTqTOwDtf96_Xdzk	TMED7	transmembrane p24 trafficking protein 7	-0.0701045	-0.0507402	-1.86846	0.0660263	0.999464	-4.02676
oo3h9L7kjBJOMDi2oU	REL	REL proto-oncogene, NF-kB subunit	-0.125226	-0.0595668	-1.86779	0.066122	0.999464	-4.02773
uDp57uvt3nnvkR6vkk	CHIC1	cysteine rich hydrophobic domain 1	-0.170931	-0.00584318	-1.86768	0.0661368	0.999464	-4.02788
Et3AR60eySsBHHcG6I	LCLAT1	lysocardiolipin acyltransferase 1	-0.100739	0.000516145	-1.86666	0.0662823	0.999464	-4.02935
WFhec1dOVJeH3riulQ	TBRG4	transforming growth factor beta regulator 4	-0.135089	0.0554604	-1.86417	0.0666361	0.999464	-4.03291
936Se__l1.A9x8Xi9I	MON2	MON2 homolog, regulator of endosome-to-Golgi trafficking	-0.0908731	-0.0488325	-1.86415	0.0666376	0.999464	-4.03293
xe78OPPtT4l7Hef1MU	NUP54	nucleoporin 54	-0.0632131	-0.00332373	-1.86409	0.0666467	0.999464	-4.03302
EkruqvCR8.iuqu9F3c	ATF6B	activating transcription factor 6 beta	0.12048	0.0404357	1.86402	0.0666574	0.999464	-4.03313
QuP3P3lUSrCoYt96Ck	NAA60	N(alpha)-acetyltransferase 60, NatF catalytic subunit	-0.0922842	0.00908491	-1.86344	0.0667402	0.999464	-4.03396
QldEjlSXTJ4L5eDjXU	FLOT1	flotillin 1	0.0909365	0.0161939	1.86287	0.0668206	0.999464	-4.03476
ZXRS59MxTjMN4CqSPA	LGALS3	galectin 3	-0.142878	-0.0119436	-1.86187	0.0669638	0.999464	-4.03619
lXV41buUUoqLpJzLek	ADGRE5	adhesion G protein-coupled receptor E5	0.10157	-0.0129085	1.86125	0.0670522	0.999464	-4.03707
ZeuIt4oyIf.3RTg7RU	GPATCH4	G-patch domain containing 4	-0.134677	-0.0382721	-1.86029	0.0671901	0.999464	-4.03845
xInUrevfdcClSnu6VY	ZNF626	zinc finger protein 626	0.115699	0.00606768	1.85918	0.067349	0.999464	-4.04002
6ZCeV9SaesZiNmSh.A	HIST2H3A	histone cluster 2 H3 family member a	0.202479	0.0478634	1.85863	0.0674286	0.999464	-4.04081
W.lXdFJboJSSzYndEs	TUBB	tubulin beta class I	0.0829069	0.0319001	1.85814	0.0674987	0.999464	-4.04151
oS1deCo3DUo74Oo8_U	PDCD10	programmed cell death 10	-0.0717024	0.0182578	-1.85788	0.0675368	0.999464	-4.04188
EindToKOBEzi0Kj5D0	C10orf88	chromosome 10 open reading frame 88	-0.0792404	-0.0131604	-1.85678	0.0676945	0.999464	-4.04344
KlZFRTpRL0knoKCOmU	FABP5	fatty acid binding protein 5	0.0847898	0.0366782	1.85512	0.0679355	0.999464	-4.04581
QXnojsD_U4fXooSSTo	ZWINT	ZW10 interacting kinetochore protein	0.0831526	0.0435968	1.8536	0.0681555	0.999464	-4.04797
r8oqKOwMlkQKrUEnf4	BTK	Bruton tyrosine kinase	0.0617249	-0.0202674	1.8531	0.0682272	0.999464	-4.04868
EQVnVgBolVCwJEFeAg	TMEM254	transmembrane protein 254	0.0861993	-0.0204659	1.85299	0.0682438	0.999464	-4.04884
0rkBtARboKIAo6glYo	KIF26B	kinesin family member 26B	0.138085	-0.0724569	1.85248	0.0683178	0.999464	-4.04956
B7ZbXtVJefu1bivtDA	NDUFS7	NADH:ubiquinone oxidoreductase core subunit S7	0.0830447	-0.00421945	1.85175	0.0684239	0.999464	-4.0506
3KAqlJ97hh55IpK5L8	NR3C1	nuclear receptor subfamily 3 group C member 1	0.145603	-0.0592642	1.85149	0.0684621	0.999464	-4.05097
Zwaj.TpllUVk80e7jo	STRN4	striatin 4	0.110415	0.0025928	1.85132	0.0684868	0.999464	-4.05121
i4hf56K7U15z53ios0	TROVE2	TROVE domain family member 2	-0.0852525	0.00975704	-1.85076	0.068568	0.999464	-4.052
ioJTIPnetAFCRFMl8E	DTL	denticleless E3 ubiquitin protein ligase homolog	0.100193	0.0388173	1.85058	0.0685949	0.999464	-4.05226
QT2uE93VOEVIKpIIFE	CCNK	cyclin K	0.0727195	-0.00841485	1.85045	0.0686138	0.999464	-4.05245
3E_dFxLhtupmjuehis	TBCD	tubulin folding cofactor D	0.121426	0.0411953	1.85019	0.0686514	0.999464	-4.05281
x67fHV6CXgOroMmsKc	GATAD2B	GATA zinc finger domain containing 2B	-0.0808213	-0.0255167	-1.85007	0.0686686	0.999464	-4.05298
N0_ivqCguKIC7378u8	HECA	hdc homolog, cell cycle regulator	-0.13395	-0.0116161	-1.84894	0.0688342	0.999464	-4.05459
H0ukdIE9E__5DTRRzU	DCTN1-AS1	DCTN1 antisense RNA 1	-0.136798	-0.033014	-1.8484	0.0689136	0.999464	-4.05536
0k7uZulu3uz9xu7Z30	UBALD1	UBA like domain containing 1	-0.120407	0.0301178	-1.84784	0.0689956	0.999464	-4.05615
Z.1NUE_OCbSge7tyOw	UBE2H	ubiquitin conjugating enzyme E2 H	-0.0849623	-0.00237728	-1.84684	0.0691429	0.999464	-4.05757
fqm1HUATNFIuEH0ldI	ZSCAN26	zinc finger and SCAN domain containing 26	-0.0741577	0.0189088	-1.8468	0.0691478	0.999464	-4.05762
cZ3e3p7G3rvdDn.ckE	GAD1	glutamate decarboxylase 1	-0.179097	0.0180871	-1.84593	0.0692768	0.999464	-4.05886
r3tnR2VZ.d7dF9NR3k	FOXP4	forkhead box P4	-0.153248	0.00575759	-1.84567	0.0693152	0.999464	-4.05923
9IoSd4QKWxDlqCODuY	POTEG	POTE ankyrin domain family member G	-0.192712	-0.0172804	-1.84548	0.0693428	0.999464	-4.0595
ZqAoJKkuurt4BdIBME	ADH5	alcohol dehydrogenase 5 (class III), chi polypeptide	0.131482	0.033174	1.84525	0.0693769	0.999464	-4.05982
WQuX3Ua5D0h9LjdS60	LRRFIP2	LRR binding FLII interacting protein 2	-0.067892	0.0260078	-1.84502	0.0694102	0.999464	-4.06014
3SCWEKb0JgBOFniVOI	ATRX	ATRX, chromatin remodeler	-0.134462	-0.0701258	-1.8448	0.0694425	0.999464	-4.06045
00iSA6pfpKDMkQKglw	MMS22L	MMS22 like, DNA repair protein	0.11505	-7.73288e-05	1.84421	0.0695295	0.999464	-4.06129
0glrql9oCIiSngigYw	ATPIF1	ATPase inhibitory factor 1	0.0727855	0.00378922	1.84406	0.0695512	0.999464	-4.0615
cH5Lp4ECJOn4g0Co3k	HS2ST1	heparan sulfate 2-O-sulfotransferase 1	-0.089471	-0.0253309	-1.84398	0.069563	0.999464	-4.06161
u1Nq5gH_ukKlClrqD8	LSM10	LSM10, U7 small nuclear RNA associated	0.0625387	-0.00224357	1.84358	0.0696231	0.999464	-4.06219
Nnhs.TpLQtQ6SbfbWo	DHX30	DExH-box helicase 30	0.0634814	0.00981943	1.84349	0.0696359	0.999464	-4.06231
N71TiXKNXuFdBOCOuM	LYPLA2P1	lysophospholipase II pseudogene 1	-0.122731	0.0232343	-1.84257	0.0697724	0.999464	-4.06361
H0N5V.0lcf_k9fqJdI	ZSWIM3	zinc finger SWIM-type containing 3	-0.100259	0.0438421	-1.84191	0.0698703	0.999464	-4.06455
KlJUi0tTarxP1Ct55c	C1orf109	chromosome 1 open reading frame 109	-0.0731548	0.00851382	-1.84187	0.069876	0.999464	-4.0646
NqRy5yyM8cV14oDSA4	FBXL3	F-box and leucine rich repeat protein 3	-0.127185	0.0158296	-1.84085	0.0700268	0.999464	-4.06604
f6UCIHEx5UvQiGoMVI	CENPJ	centromere protein J	-0.083159	0.0153849	-1.84029	0.0701103	0.999464	-4.06683
Q57qrl9dJd6V36dI9A	KRBA1	KRAB-A domain containing 1	-0.115518	-0.0246666	-1.84013	0.070134	0.999464	-4.06706
rap5L54gNE2CJ4Dsmk	GOLIM4	golgi integral membrane protein 4	-0.127344	0.00371208	-1.84006	0.0701443	0.999464	-4.06716
cNV8JUhN76heFVrT68	TRMT5	tRNA methyltransferase 5	0.0727648	0.0462892	1.83974	0.0701927	0.999464	-4.06762
uUnkaFK9WQBPlJy4pM	DNAJA4	DnaJ heat shock protein family (Hsp40) member A4	-0.105929	-0.00756633	-1.83959	0.070215	0.999464	-4.06783
WpFUi10HoXKoIKIzVE	HDAC8	histone deacetylase 8	0.104596	0.0180133	1.83941	0.0702407	0.999464	-4.06807
Bjfqvpf5OopK6p_jSw	B4GALT2	beta-1,4-galactosyltransferase 2	0.162697	0.0409358	1.83896	0.0703081	0.999464	-4.06871
N5AXsfU47qCuKeUKII	TMEM243	transmembrane protein 243	-0.0756271	0.00692186	-1.83882	0.0703294	0.999464	-4.06891
9F6uOdfqlcXIqHh.7U	LRRFIP2	LRR binding FLII interacting protein 2	0.0848206	-0.0048114	1.83857	0.0703669	0.999464	-4.06927
KwBAkFV.VcUcaAIkJ0	TAF1	TATA-box binding protein associated factor 1	0.151638	0.00856503	1.83828	0.0704093	0.999464	-4.06967
EAPPKeSKQijVeJUgvQ	ATG12	autophagy related 12	-0.112512	-0.00391693	-1.8375	0.0705259	0.999464	-4.07077
6Wf__7uHUCDlZngP6Y	GSTZ1	glutathione S-transferase zeta 1	0.0765541	0.0076236	1.8375	0.0705265	0.999464	-4.07078
6V38EQqV1_0_F8nAU4	MAPRE2	microtubule associated protein RP/EB family member 2	0.0797063	-0.0111701	1.83732	0.0705528	0.999464	-4.07103
Kn2jl9iLrmGX37jnd4	BANF1	barrier to autointegration factor 1	0.0686378	0.0478089	1.83703	0.070596	0.999464	-4.07143
9kpQkqQVRFfhMAk34I	C19orf48	chromosome 19 open reading frame 48	0.0658112	0.0113082	1.83698	0.0706043	0.999464	-4.07151
WObnWfQ4hBXuQlXrVA	IP6K2	inositol hexakisphosphate kinase 2	0.116719	0.0237845	1.83686	0.0706219	0.999464	-4.07168
c2UitWtWNCtSNL4S6Q	SRSF5	serine and arginine rich splicing factor 5	0.069798	0.00460938	1.83656	0.0706672	0.999464	-4.0721
9jlZFNZxVjVdNCuDjE	RPS4X	ribosomal protein S4, X-linked	0.0565459	0.0238995	1.83624	0.0707141	0.999464	-4.07255
uXwdfXUIJe9u3uOTv0	EEA1	early endosome antigen 1	-0.107057	-0.0399887	-1.83443	0.0709858	0.999464	-4.0751
KVcNUkf_orQriSBF4o	CES2	carboxylesterase 2	-0.163315	-0.0165974	-1.83417	0.0710257	0.999464	-4.07547
9K1yu4XjFFFf7pJFqc	TOR1B	torsin family 1 member B	-0.0928098	-0.00746638	-1.83399	0.0710523	0.999464	-4.07572
3oIK9epTSzu_SJ0SUo	TTC13	tetratricopeptide repeat domain 13	-0.0738601	-0.0324853	-1.83335	0.0711486	0.999464	-4.07662
fpfXCUxULETMkT9FQo	SUOX	sulfite oxidase	0.106048	0.000938072	1.83301	0.0711996	0.999464	-4.0771
HeOfR_R3Ceg1Ad6.t0	CDC26	cell division cycle 26	-0.0678537	-0.0081144	-1.83287	0.0712199	0.999464	-4.07729
BlyUvclXtd8jM1V.eo	PRKAG1	protein kinase AMP-activated non-catalytic subunit gamma 1	0.0705118	0.0420823	1.83249	0.0712779	0.999464	-4.07783
BeU4JL957H6OLUOV6o	GTF2H5	general transcription factor IIH subunit 5	-0.0540365	0.0220764	-1.83175	0.0713887	0.999464	-4.07887
6.oeiCoppqYJkbYmqg	PAIP2	poly(A) binding protein interacting protein 2	0.156979	0.0159006	1.83168	0.0714007	0.999464	-4.07898
0oKJHocttHFf.o9KnU	ACAP2	ArfGAP with coiled-coil, ankyrin repeat and PH domains 2	0.0772289	0.0132052	1.83097	0.0715069	0.999464	-4.07997
c7dQX7kfnNz3u55JeI	LNPK	lunapark, ER junction formation factor	-0.101958	-0.0131731	-1.83096	0.0715092	0.999464	-4.07999
TbinVSUSVXfH5fAHog	RNF216	ring finger protein 216	-0.0622047	0.0118208	-1.83085	0.0715258	0.999464	-4.08014
Eh7HeKUAlItpXgZUYc	CXorf40B	chromosome X open reading frame 40B	0.107297	-0.00465347	1.83071	0.0715463	0.999464	-4.08033
oFVEhVvXUl5uVcF6f8	APOBEC3C	apolipoprotein B mRNA editing enzyme catalytic subunit 3C	0.0832755	0.0267208	1.82952	0.071727	0.999464	-4.08201
0pU5eyxec_sKeK6CvQ	POLR3A	RNA polymerase III subunit A	-0.111942	0.00485958	-1.829	0.0718054	0.999464	-4.08274
EXKDdeoNzVwoMAJlJE	ZFP1	ZFP1 zinc finger protein	-0.114452	-0.0252707	-1.82871	0.0718491	0.999464	-4.08315
9vqgijCvM3KEHf4vrU	ZC3H7A	zinc finger CCCH-type containing 7A	0.106507	-0.0426161	1.8281	0.0719421	0.999464	-4.084
0cMC6mYiinnu79eVSU	ASL	argininosuccinate lyase	-0.149682	0.0435918	-1.82773	0.0719977	0.999464	-4.08452
3ioggwJJ5eiXPRzvz4	TUBA4A	tubulin alpha 4a	0.0695941	-0.00153688	1.8277	0.0720028	0.999464	-4.08457
uo4qR7mizrR4oPQ6SY	CENPV	centromere protein V	0.0952223	0.00677243	1.82699	0.0721106	0.999464	-4.08556
leKQlOi4hUoloR90oA	THY1	Thy-1 cell surface antigen	-0.211104	-0.00117112	-1.82678	0.0721426	0.999464	-4.08586
u57Ge5moFG4Dm_KX54	RFXANK	regulatory factor X associated ankyrin containing protein	0.0617277	-0.00249143	1.82667	0.0721593	0.999464	-4.08601
Eqj_iqkpAtAuDhd7UU	SNAPIN	SNAP associated protein	-0.0870277	-0.0227269	-1.82665	0.0721628	0.999464	-4.08604
ce6qKdK7eiqv7l4wbA	ARSA	arylsulfatase A	-0.138399	-0.0401095	-1.8266	0.0721696	0.999464	-4.08611
oePsl64pe.yH3heyJ4	CD27-AS1	CD27 antisense RNA 1	-0.0837341	0.0100791	-1.82501	0.0724131	0.999464	-4.08835
c1F1N9.kl6unOrH26U	MYL2	myosin light chain 2	0.159575	-0.0222613	1.82356	0.072634	0.999464	-4.09037
o1atHo1557DqBV1VPw	PPP2R1A	protein phosphatase 2 scaffold subunit Aalpha	0.0660953	0.0189978	1.82333	0.07267	0.999464	-4.0907
NlJfXQg5SEuhIgk5CE	UBE2T	ubiquitin conjugating enzyme E2 T	0.066388	-0.00868185	1.82259	0.0727837	0.999464	-4.09174
BeoECrURUkUeJC.uJI	CDK5RAP2	CDK5 regulatory subunit associated protein 2	0.108474	0.0255144	1.82199	0.0728747	0.999464	-4.09257
lsSNUnzpfhUltdEjlo	SPSB1	splA/ryanodine receptor domain and SOCS box containing 1	0.171494	-0.00164303	1.82174	0.0729138	0.999464	-4.09293
lLRS6eSCpRXJf8Hn_0	ENKD1	enkurin domain containing 1	0.0773782	-0.0314229	1.82114	0.0730059	0.999464	-4.09376
6Qsu3tJXfB3uRlc.S0	PPIL1	peptidylprolyl isomerase like 1	0.0650818	-0.0084445	1.82073	0.0730682	0.999464	-4.09433
feXQteRt1eoQC_ullw	MOSPD3	motile sperm domain containing 3	0.120613	0.0733216	1.82059	0.0730904	0.999464	-4.09453
ZfczqFYPIR54NexJfE	DEGS1	delta 4-desaturase, sphingolipid 1	-0.0532091	0.0328235	-1.82058	0.0730916	0.999464	-4.09454
HSqDURJWdUonDrIm18	IL17RA	interleukin 17 receptor A	0.125532	0.0141407	1.8205	0.0731045	0.999464	-4.09466
0wizN6dfhSQ2leolFI	MYO1C	myosin IC	-0.114927	-0.0126453	-1.82025	0.0731425	0.999464	-4.09501
00K3OeGXV631V5_6eA	DHPS	deoxyhypusine synthase	0.0586463	0.00166995	1.81953	0.0732538	0.999464	-4.09602
WqsSur1dN6L1V0MCQo	HDAC11	histone deacetylase 11	-0.18797	0.0772234	-1.81949	0.0732597	0.999464	-4.09607
WgdUA7JC1JV5TKVKfY	SYCE2	synaptonemal complex central element protein 2	0.161406	-0.00803147	1.81942	0.0732711	0.999464	-4.09617
ZCNuyPqvqio4KmLg3A	TOP1	DNA topoisomerase I	-0.145464	-0.0629727	-1.81853	0.0734083	0.999464	-4.09742
cRZUlZZWvlOmGW2ZRo	CYB561	cytochrome b561	0.134127	0.0608011	1.81782	0.073518	0.999464	-4.09841
lLpe54IukICShoq4Ec	TIPRL	TOR signaling pathway regulator	-0.0736734	0.0241598	-1.81778	0.0735233	0.999464	-4.09846
fKOS0UHEB6XoLEtNGU	TTC21A	tetratricopeptide repeat domain 21A	-0.159723	0.0122456	-1.81774	0.0735299	0.999464	-4.09852
ZuYFknlDklnqnngDl8	SCAMP3	secretory carrier membrane protein 3	-0.113175	-0.0111079	-1.81764	0.0735456	0.999464	-4.09866
Evziop8AN6g7F.hdek	METTL18	methyltransferase like 18	0.096056	0.0403673	1.81704	0.0736378	0.999464	-4.09949
rQdHl56Cd7qDSOAfio	PRKAG1	protein kinase AMP-activated non-catalytic subunit gamma 1	0.0940104	0.0409576	1.81676	0.0736815	0.999464	-4.09988
lVyKI9IJEFEkIkXp40	CYB5A	cytochrome b5 type A	-0.0813588	0.0169211	-1.81625	0.0737603	0.999464	-4.10059
NpQJE5KdevvXdAXueE	FBN2	fibrillin 2	0.177441	0.00173987	1.81513	0.0739348	0.999464	-4.10216
695JOXVUTdMkUr7t4U	RAPGEF6	Rap guanine nucleotide exchange factor 6	0.0898168	-0.0180733	1.81324	0.0742284	0.999464	-4.10479
lnd5da0d_e65xuguDo	PSMD7	proteasome 26S subunit, non-ATPase 7	-0.0621092	0.0148634	-1.81294	0.0742753	0.999464	-4.10521
3jsLpUVQ.7BOOQu3pE	PDS5A	PDS5 cohesin associated factor A	0.0797658	-0.0140309	1.81233	0.0743713	0.999464	-4.10607
iXu4qRBSlGoX3Nd7P4	GSS	glutathione synthetase	0.0772535	0.00115796	1.81098	0.0745825	0.999464	-4.10795
ETs2gfIHrqZrp35ew0	KIAA0408	KIAA0408	-0.165452	-0.00969662	-1.81097	0.0745829	0.999464	-4.10796
QWfV71YH94UIq49S94	PELO	pelota mRNA surveillance and ribosome rescue factor	-0.0774076	0.00481324	-1.81031	0.0746872	0.999464	-4.10888
ipXV5HVd_ebvj_ikeQ	ATP6V0B	ATPase H+ transporting V0 subunit b	-0.0601878	-0.0411738	-1.81006	0.0747263	0.999464	-4.10923
rcpUleCN7kZNB3eCg0	PHC3	polyhomeotic homolog 3	-0.0803289	-0.00994584	-1.80996	0.0747413	0.999464	-4.10936
ru.AIIQAeBQB36qiq4	FGF18	fibroblast growth factor 18	-0.175899	0.00450106	-1.80936	0.0748359	0.999464	-4.1102
iukJL3.SSP_VHPXeJ4	CD93	CD93 molecule	-0.251631	-0.0171355	-1.80852	0.0749675	0.999464	-4.11137
ZksO7NIwgkegBY23co	ROCK1	Rho associated coiled-coil containing protein kinase 1	-0.126914	-0.0113379	-1.80833	0.0749977	0.999464	-4.11164
Z_jed10kNIJ_Ad6F6k	NLRP7	NLR family pyrin domain containing 7	0.157462	-0.0193268	1.80757	0.075118	0.999464	-4.1127
o7XUiS46KAxSVKCSSo	ZNF655	zinc finger protein 655	-0.121905	0.00956722	-1.80746	0.0751351	0.999464	-4.11285
KvXBQtJdIlKKh7ovPk	RFX3	regulatory factor X3	-0.183181	-0.0374029	-1.80685	0.0752302	0.999464	-4.11369
f7RJH0gDEQSVfeVWRI	RAI14	retinoic acid induced 14	-0.161377	-0.0155133	-1.8063	0.0753171	0.999464	-4.11445
BVIKgJ7FL5wXt_.SiU	KCTD3	potassium channel tetramerization domain containing 3	0.0861036	0.00551138	1.80625	0.0753257	0.999464	-4.11453
Te_l.fJf.e.U9LnUJk	POLE3	DNA polymerase epsilon 3, accessory subunit	-0.0709512	0.0493497	-1.80531	0.0754739	0.999464	-4.11583
ZhAGpmOOV6f0q60geg	TICAM1	toll like receptor adaptor molecule 1	-0.132612	-0.0258966	-1.80491	0.0755375	0.999464	-4.11639
0KVgI1U009lvF5SOok	POLR2F	RNA polymerase II subunit F	0.0528576	0.0110384	1.8041	0.0756653	0.999464	-4.11751
WJBSL9T2gr1eQCpEiU	BCL7C	BCL tumor suppressor 7C	-0.0943558	0.0340288	-1.80307	0.0758293	0.999464	-4.11895
TO4VKMSLvntdKitY3o	KHK	ketohexokinase	-0.13493	0.0174488	-1.80302	0.0758371	0.999464	-4.11902
Wfngr16dTZH17UhHrs	TAF6	TATA-box binding protein associated factor 6	-0.134611	-0.0372919	-1.80239	0.0759375	0.999464	-4.11989
rnn4LSB546IQKRgLsY	SF3B1	splicing factor 3b subunit 1	-0.1544	0.00856457	-1.80216	0.0759731	0.999464	-4.1202
WXTp3pEuw1KrsjqoHs	BAK1	BCL2 antagonist/killer 1	0.15148	-0.0232152	1.80062	0.0762193	0.999464	-4.12235
rTS8juqHQ0RnfQtadU	FILIP1	filamin A interacting protein 1	-0.098998	0.0665751	-1.80056	0.0762284	0.999464	-4.12243
uuXdJb4_wfwLVOv_i4	DUS4L	dihydrouridine synthase 4 like	0.0673089	0.0277868	1.80031	0.0762673	0.999464	-4.12276
cqCIvTSoePGyiIY5Ko	ZNF766	zinc finger protein 766	0.108725	-0.0100849	1.7997	0.076365	0.999464	-4.12361
QooKh.og6B34ofyUrs	CCDC126	coiled-coil domain containing 126	-0.0970718	0.0221096	-1.79924	0.0764383	0.999464	-4.12425
TS046XkdREOQSLgIko	SMA5	glucuronidase beta pseudogene	0.114638	0.0491478	1.79843	0.076568	0.999464	-4.12537
TWh1X_8TkT.U_8XY5A	CSPP1	centrosome and spindle pole associated protein 1	0.0819252	0.00415798	1.79779	0.0766714	0.999464	-4.12626
cXl5GX0sHWJIDRN_VE	SPATA13	spermatogenesis associated 13	-0.157418	0.0121066	-1.79777	0.0766734	0.999464	-4.12628
ugIDiSf6MOGEkFYISo	ZNF226	zinc finger protein 226	0.09283	0.0169979	1.79768	0.0766878	0.999464	-4.12641
Qb64lgvAXAnNV6N.ck	DDX5	DEAD-box helicase 5	0.1838	0.0440275	1.79717	0.0767698	0.999464	-4.12711
95SDsvlNI.j7gQoeHk	TMEM167A	transmembrane protein 167A	-0.0897858	-0.01776	-1.79655	0.0768702	0.999464	-4.12798
NV50BEuqNIgCqegKqg	TBX21	T-box 21	-0.138863	0.00254141	-1.79653	0.076872	0.999464	-4.128
QUtxFKXdQohL08.KLg	GAN	gigaxonin	-0.138057	-0.0227848	-1.79603	0.0769526	0.999464	-4.12869
BlxxEXKc.rMl7616rE	MCOLN3	mucolipin 3	0.104653	0.0173121	1.79579	0.0769918	0.999464	-4.12903
fiBrp1RKENnlVQXbJA	PPP1R14B	protein phosphatase 1 regulatory inhibitor subunit 14B	0.0641061	-0.00201436	1.79487	0.0771392	0.999464	-4.13029
rkgiru.gNNotJSie0U	DAPK1	death associated protein kinase 1	-0.0885714	-0.0118188	-1.79424	0.0772407	0.999464	-4.13116
ukoevq3qjc6TUIS4R0	OASL	2'-5'-oligoadenylate synthetase like	0.0915606	-0.0505775	1.79394	0.0772891	0.999464	-4.13158
fclcj.osAVfSR_FgMU	HNRNPH3	heterogeneous nuclear ribonucleoprotein H3	0.0744664	0.0159759	1.79385	0.0773042	0.999464	-4.13171
H99XUIkAXqQqh8eLqo	STK16	serine/threonine kinase 16	-0.1087	0.0341435	-1.79383	0.0773072	0.999464	-4.13173
reQSX3jpTgKELOiOAk	TRAPPC6B	trafficking protein particle complex 6B	0.124247	0.0168744	1.79361	0.0773428	0.999464	-4.13204
Q7LRJx2opYrqKt94lQ	ERGIC1	endoplasmic reticulum-golgi intermediate compartment 1	0.183622	-0.0156562	1.79253	0.0775178	0.999464	-4.13353
9d9Hy2E04DESigZfWA	ZFP69	ZFP69 zinc finger protein	-0.109898	0.00721214	-1.79237	0.0775428	0.999464	-4.13375
idEulOq7argqe1Scfs	TPRN	taperin	0.0961082	-0.00154951	1.79131	0.0777143	0.999464	-4.13521
3Aiun8iqluiiREiun8	METTL14	methyltransferase like 14	-0.114592	0.0334016	-1.78958	0.0779946	0.999464	-4.13759
EbBFAwVVILJSKUv4E0	MGME1	mitochondrial genome maintenance exonuclease 1	0.0565105	-0.00762521	1.78948	0.0780112	0.999464	-4.13773
o1XnH_AUgDDh6U9vE0	IGF1	insulin like growth factor 1	0.144748	0.0307623	1.7893	0.0780406	0.999464	-4.13798
ZdAgvESX6eCQHlwCiU	GIMAP2	GTPase, IMAP family member 2	-0.103235	-0.0513463	-1.78809	0.0782376	0.999464	-4.13965
6TxQp.yDkv3T_e6E4U	SNORA32	small nucleolar RNA, H/ACA box 32	-0.156792	-0.0662982	-1.7877	0.0783006	0.999464	-4.14018
HiTqPjaSQiwIRJ1IpU	MRPL38	mitochondrial ribosomal protein L38	0.0680469	0.0336608	1.78755	0.0783265	0.999464	-4.1404
NGpdb_6JZ58H03r154	GET4	golgi to ER traffic protein 4	0.0810448	0.0238425	1.78715	0.0783903	0.999464	-4.14094
Boq4S6WVClRifvf738	CCR7	C-C motif chemokine receptor 7	-0.105689	0.0228495	-1.7867	0.0784644	0.999464	-4.14156
BSQ3rVS2RB9UTFSKIk	PIGN	phosphatidylinositol glycan anchor biosynthesis class N	0.0799825	0.0281114	1.78658	0.0784842	0.999464	-4.14173
9keH4VRC6APVRWEX_c	SEPT10	septin 10	-0.133735	0.0632969	-1.78652	0.0784932	0.999464	-4.1418
iFenouojznUse.1Gno	PRIM1	DNA primase subunit 1	0.0705047	-0.0102592	1.78632	0.0785257	0.999464	-4.14208
ifuf5f4A58DpThXfXk	VPS13A	vacuolar protein sorting 13 homolog A	-0.11488	-0.0206002	-1.78606	0.0785688	0.999464	-4.14244
xvA5rskC86refipHBc	BANK1	B-cell scaffold protein with ankyrin repeats 1	0.164238	-0.0171166	1.78589	0.0785968	0.999464	-4.14268
usqrl11eiDHuheRP1A	IRF3	interferon regulatory factor 3	0.0623897	0.0172241	1.78516	0.0787169	0.999464	-4.14369
u55QF4qe6roOJ6CluM	PCBD1	pterin-4 alpha-carbinolamine dehydratase 1	0.0812343	0.0416861	1.78508	0.0787298	0.999464	-4.14379
HntIF2IkgTiAdInehY	ALCAM	activated leukocyte cell adhesion molecule	-0.0761642	0.0118761	-1.78486	0.0787645	0.999464	-4.14409
lAZSt5e9_epDp46eUs	ABR	active BCR-related	-0.0611914	0.00526488	-1.78449	0.0788264	0.999464	-4.14461
NJQtGpKWS69_bpev88	TMEM175	transmembrane protein 175	0.0839768	-0.0595034	1.78352	0.0789857	0.999464	-4.14594
c82nKbrrk5ew3aCnik	MBD4	methyl-CpG binding domain 4, DNA glycosylase	-0.133111	-0.0514078	-1.78347	0.0789933	0.999464	-4.146
HkRuSXM6gBfV3sXl0A	LRP5L	LDL receptor related protein 5 like	-0.0995454	0.0112886	-1.7833	0.0790217	0.999464	-4.14624
TpU8h7_SpNHn1V4RdE	GINS3	GINS complex subunit 3	0.0792883	0.0698347	1.7833	0.079022	0.999464	-4.14624
BuuRF7LV8dXrp4pPNU	NFYB	nuclear transcription factor Y subunit beta	-0.138159	-0.018835	-1.78281	0.0791011	0.999464	-4.1469
HlSlJICSdILPvnTruk	ANKS1A	ankyrin repeat and sterile alpha motif domain containing 1A	-0.0804103	-0.0221633	-1.7812	0.079366	0.999464	-4.14911
rYXxMoogx_CSznnuvI	KCNK1	potassium two pore domain channel subfamily K member 1	-0.0935854	-0.0397152	-1.78105	0.0793916	0.999464	-4.14933
lefnKdDxR97_f7o16g	METTL1	methyltransferase like 1	-0.0709751	0.00429994	-1.78095	0.0794076	0.999464	-4.14946
uOq6EEW0haiFKknfRI	HJURP	Holliday junction recognition protein	0.0893895	0.0558638	1.78085	0.0794246	0.999464	-4.1496
cVFINwkv9FV0gFHtPI	DMTF1	cyclin D binding myb like transcription factor 1	-0.0964204	0.00640085	-1.78016	0.0795389	0.999464	-4.15055
fuSNSoBStRRdp6c_fg	EIF2D	eukaryotic translation initiation factor 2D	0.0648771	-0.00911484	1.77963	0.0796262	0.999464	-4.15128
ifU9_0_tDKoqyPJ51I	NT5C2	5'-nucleotidase, cytosolic II	-0.0506391	0.0156701	-1.77894	0.0797405	0.999464	-4.15222
uAA3BHpxVnahV9RnuA	FAM104B	family with sequence similarity 104 member B	0.124744	0.00586418	1.77862	0.0797923	0.999464	-4.15265
ioNfvl44c7r1X4eghE	N4BP2L2	NEDD4 binding protein 2 like 2	-0.0925643	-0.00757015	-1.77832	0.0798421	0.999464	-4.15306
Tkie_jd7tejvh5fg.U	CCNE1	cyclin E1	0.113076	0.0602127	1.7769	0.0800789	0.999464	-4.15502
EKefAJOBWo5Ikn.uRo	SNAP29	synaptosome associated protein 29	0.0795674	0.00361597	1.77674	0.0801055	0.999464	-4.15524
3Svt5P767C4E00S814	SMNDC1	survival motor neuron domain containing 1	-0.0658588	0.0205576	-1.77617	0.0802002	0.999464	-4.15602
o.erexakdxenB6NKaw	KDELR3	KDEL endoplasmic reticulum protein retention receptor 3	0.139478	-0.0148429	1.776	0.0802286	0.999464	-4.15625
r7f.UuU0FF0CEevNIo	LRRC37BP1	leucine rich repeat containing 37B pseudogene 1	0.129703	0.027018	1.77587	0.0802499	0.999464	-4.15643
9qaT8R7kLPiCLkwISo	MOB1B	MOB kinase activator 1B	-0.139596	0.00835848	-1.77576	0.0802685	0.999464	-4.15658
Tl6K7grns1aA3N6Feg	FHOD1	formin homology 2 domain containing 1	0.0657966	0.0121903	1.77533	0.08034	0.999464	-4.15717
r6LcBqko3uUAiXd1os	WHAMM	WAS protein homolog associated with actin, golgi membranes and microtubules	-0.126108	0.016681	-1.77459	0.080463	0.999464	-4.15818
Hua3_911uAB7tYgR2o	PDGFA	platelet derived growth factor subunit A	-0.163899	-0.0213599	-1.77439	0.0804958	0.999464	-4.15845
NeUv3for6T7AooEnwo	EIF1B	eukaryotic translation initiation factor 1B	-0.0759439	-0.0331154	-1.77432	0.0805074	0.999464	-4.15854
BqfA3QH_8osEom54mo	FAM210B	family with sequence similarity 210 member B	0.165604	0.0429954	1.77397	0.0805666	0.999464	-4.15903
r5eFFx7DkgkfinTfkQ	ZNF654	zinc finger protein 654	-0.115813	0.0145866	-1.77215	0.0808702	0.999464	-4.16151
KU6Ur5couq1HjgCK78	P3H2	prolyl 3-hydroxylase 2	-0.0868063	0.0453447	-1.77191	0.0809113	0.999464	-4.16184
9UTDTv0tJDqUzK_slU	ZNF791	zinc finger protein 791	-0.0891233	0.00514913	-1.77091	0.0810789	0.999464	-4.16321
xl1CD9BdBNF6nlL90k	ATRN	attractin	-0.143645	0.0481686	-1.7693	0.0813485	0.999464	-4.1654
6n6Sz9J6eig_iApVBQ	PGM3	phosphoglucomutase 3	-0.0948883	-0.00647013	-1.76909	0.0813846	0.999464	-4.16569
KZIFfxez16EKXIgYnk	PLEKHG1	pleckstrin homology and RhoGEF domain containing G1	0.121063	-0.0416894	1.76906	0.0813899	0.999464	-4.16573
H3JK7rKJGVSCsg7rqs	TRNAU1AP	tRNA selenocysteine 1 associated protein 1	0.134408	0.0255177	1.76834	0.0815102	0.999464	-4.16671
QpPxv3eOdX4JTIPyqc	CSNK1G2	casein kinase 1 gamma 2	-0.0523874	-0.00156035	-1.76829	0.0815191	0.999464	-4.16678
QZqNfuSoInlepF6RRA	PDE9A	phosphodiesterase 9A	0.196082	0.0091242	1.76822	0.0815301	0.999464	-4.16687
WEio37sV9FSXVUOkE0	C5AR1	complement C5a receptor 1	-0.133115	-0.022217	-1.76793	0.0815796	0.999464	-4.16727
N3VAwjuefFis0arqnU	ERAP1	endoplasmic reticulum aminopeptidase 1	0.161406	-0.00413623	1.76574	0.0819491	0.999464	-4.17025
il453eMnuUwufuKz_Q	REV1	REV1, DNA directed polymerase	-0.0875715	0.0175372	-1.76571	0.0819541	0.999464	-4.17029
0KSAfVflH1AQF2lVNU	LCP2	lymphocyte cytosolic protein 2	-0.117956	-0.0407608	-1.76438	0.0821805	0.999464	-4.17211
BoqNO4vpcfELLgL1f8	PRMT6	protein arginine methyltransferase 6	0.0739692	-0.0150252	1.76355	0.0823204	0.999464	-4.17323
3IBLuikpmNJYHcqH64	FOXN3	forkhead box N3	-0.0585776	0.014826	-1.7634	0.0823462	0.999464	-4.17343
6e5enz9HSTDuRavRU4	PARP3	poly(ADP-ribose) polymerase family member 3	0.075055	-0.00599932	1.76306	0.0824049	0.999464	-4.1739
01kigeOLuQ_IkyS6SU	CTSC	cathepsin C	0.0676998	0.0192268	1.76272	0.0824621	0.999464	-4.17436
ZH57tQtQNeCiGaiVGg	FIS1	fission, mitochondrial 1	0.0716726	-0.00802398	1.76261	0.0824816	0.999464	-4.17452
9rI7U5U7nXnqHQ9Kc4	LONP2	lon peptidase 2, peroxisomal	-0.0644065	-0.0141214	-1.76136	0.0826934	0.999464	-4.17621
ERnd6rhyNRKBQBkv1A	TANGO6	transport and golgi organization 6 homolog	-0.112903	0.0667865	-1.76097	0.0827604	0.999464	-4.17674
uHsBTr1JJe9RFVEU0o	AVPI1	arginine vasopressin induced 1	0.0919746	0.00459393	1.7602	0.0828913	0.999464	-4.17778
TThQRqghCmgqnpw7ks	ARMC9	armadillo repeat containing 9	-0.148984	0.0207283	-1.75996	0.0829339	0.999464	-4.17812
KilXCek0FUpRnZ39fU	MTA2	metastasis associated 1 family member 2	0.0701225	0.00503668	1.75982	0.0829577	0.999464	-4.17831
9CuQfX2ttWDWr01hFI	RPL12	ribosomal protein L12	0.0501313	0.014938	1.75795	0.0832768	0.999464	-4.18084
BJ5iJ4gpjp4KFKJ4lc	NDUFB6	NADH:ubiquinone oxidoreductase subunit B6	0.0870985	0.0146175	1.75761	0.0833353	0.999464	-4.1813
iboTyRI7SCAWgXUghI	MRPL42P5	mitochondrial ribosomal protein L42 pseudogene 5	-0.14713	0.00607493	-1.75751	0.0833522	0.999464	-4.18143
TRRClOjuqtz1ISHwqc	ZBTB38	zinc finger and BTB domain containing 38	-0.130364	-0.00880189	-1.75684	0.0834678	0.999464	-4.18234
ZE0hHhXiXHqqen16gA	GPR156	G protein-coupled receptor 156	0.167135	0.00841392	1.75566	0.0836713	0.999464	-4.18395
KUrgQnSQ2hN3qgKCuk	GGA3	golgi associated, gamma adaptin ear containing, ARF binding protein 3	-0.0936197	-0.0151749	-1.75406	0.0839466	0.999464	-4.18611
0lQqAgCgp33VSL1U5I	IL16	interleukin 16	0.107783	0.0196239	1.75379	0.0839939	0.999464	-4.18648
EuCFC1IHg1wgOSh5Ag	OAS3	2'-5'-oligoadenylate synthetase 3	-0.150567	-0.0917611	-1.75262	0.0841953	0.999464	-4.18805
31dE1blV5npfRLKw6c	UBE2J2	ubiquitin conjugating enzyme E2 J2	0.140147	-0.00160598	1.75169	0.0843572	0.999464	-4.18932
KRe80SR.qKUK6ih5_I	PLIN5	perilipin 5	-0.258778	-0.00415108	-1.75127	0.0844298	0.999464	-4.18988
6CXeJFC1CCBCCJm6Sk	ZNF598	zinc finger protein 598	0.097058	-0.0287671	1.75063	0.0845419	0.999464	-4.19076
3kilwKHt9e63vp73qE	SNORA2C	small nucleolar RNA, H/ACA box 2C	-0.149981	0.0721085	-1.75051	0.0845614	0.999464	-4.19091
l1Ko4oIpInpI9i63cU	NFATC2IP	nuclear factor of activated T-cells 2 interacting protein	-0.100374	0.0191532	-1.7504	0.0845815	0.999464	-4.19106
Tml_oAoArS5LSiIStU	BEND4	BEN domain containing 4	-0.131599	-0.0388975	-1.75017	0.0846207	0.999464	-4.19137
QBhFJQFJJV0k1JBMJo	CD52	CD52 molecule	0.0678532	0.0198352	1.75014	0.0846264	0.999464	-4.19141
x7R527rdSQqPamCEBo	CXXC5	CXXC finger protein 5	-0.0781122	-0.0144983	-1.74953	0.0847316	0.999464	-4.19223
Q5yEnkJ4AuXkP5T8.s	MCTP1	multiple C2 and transmembrane domain containing 1	-0.168451	-0.0612734	-1.74923	0.084785	0.999464	-4.19264
Kne_r7vqIJp6L093RU	CBY1	chibby family member 1, beta catenin antagonist	0.0870416	0.0243705	1.74875	0.0848682	0.999464	-4.19329
lroiagq351wu_ee6f8	CYB561A3	cytochrome b561 family member A3	0.0924417	0.0138901	1.74843	0.0849234	0.999464	-4.19372
QRoEUuTkoPToQgnlKQ	HNMT	histamine N-methyltransferase	0.120049	0.048431	1.7483	0.0849467	0.999464	-4.1939
H55X9ekqeui31dAk5c	HMCES	5-hydroxymethylcytosine (hmC) binding, ES cell-specific	0.0723165	0.0433367	1.74827	0.0849512	0.999464	-4.19393
3v0R0nE7hdSfrivl4I	METTL13	methyltransferase like 13	0.06515	0.021992	1.74773	0.0850469	0.999464	-4.19467
EWvSfWEUi6BUsJFNKA	PTCD2	pentatricopeptide repeat domain 2	0.0823738	0.013963	1.74764	0.0850627	0.999464	-4.19479
Hu7ld5S32d7Vb0NBVM	CRACR2B	calcium release activated channel regulator 2B	0.118711	-0.0121198	1.74639	0.085281	0.999464	-4.19648
fChff_BFO1QiiCmnxc	PRKDC	protein kinase, DNA-activated, catalytic polypeptide	0.104756	-0.0593661	1.74629	0.0852976	0.999464	-4.19661
EAFkjpF1bdI1IASUqU	CDCA2	cell division cycle associated 2	0.0854912	0.0603822	1.74429	0.0856476	0.999464	-4.1993
uBJ3u7grih36CSlNek	BMF	Bcl2 modifying factor	0.0953204	0.0389061	1.74344	0.0857981	0.999464	-4.20045
rZZm1d_5r0US_z8LjY	TAPBP	TAP binding protein	0.0741622	-0.0037302	1.74323	0.0858346	0.999464	-4.20073
01S9SfXAMhLqzakktE	EPB41	erythrocyte membrane protein band 4.1	0.10408	0.0227273	1.74323	0.0858353	0.999464	-4.20073
i2QZ7qb1KK626YF6Sc	SERTAD3	SERTA domain containing 3	0.174052	0.0255352	1.74288	0.0858959	0.999464	-4.2012
WOUq4KhLpSofa5I8Ik	AP5Z1	adaptor related protein complex 5 zeta 1 subunit	0.119521	0.0235235	1.74288	0.0858968	0.999464	-4.2012
6opS77qfXnqHiCnRgo	SQSTM1	sequestosome 1	-0.06479	-0.00769828	-1.74284	0.0859031	0.999464	-4.20125
NTVXOp1SVfkV0_e9I8	PTPA	protein phosphatase 2 phosphatase activator	0.0649027	-0.00138	1.74217	0.0860219	0.999464	-4.20216
NeSeol5.eUt_K94I0k	STK38	serine/threonine kinase 38	0.0645065	-0.0357819	1.74156	0.0861294	0.999464	-4.20298
6XwvUDv9Zwy3tcCX_U	RNF32	ring finger protein 32	0.107138	0.00604669	1.74152	0.0861368	0.999464	-4.20304
HqUg1UK9X._9NKV9eI	HIPK2	homeodomain interacting protein kinase 2	0.102039	0.000492215	1.7409	0.0862461	0.999464	-4.20387
Wknr9.ArvqAr8somsk	VPS13A	vacuolar protein sorting 13 homolog A	-0.105686	0.00392712	-1.74072	0.0862765	0.999464	-4.2041
NjAVAgFC3giFejirUU	FKBP3	FK506 binding protein 3	0.0811299	0.00457884	1.74028	0.086355	0.999464	-4.2047
644KXkXrVdVB3nedeA	SNORD139	small nucleolar RNA, C/D box 139	0.118676	0.0010397	1.73929	0.0865299	0.999464	-4.20603
3UdTfQFV0X9U1x15Tk	MLF2	myeloid leukemia factor 2	0.0650525	0.00740833	1.73908	0.0865674	0.999464	-4.20631
K7XOTrKR6VIKeUSAR4	SNORA5A	small nucleolar RNA, H/ACA box 5A	-0.160413	0.0141874	-1.73903	0.0865769	0.999464	-4.20638
B_xQuiSuvmpCb7kiVM	CCNE1	cyclin E1	0.072911	0.0133874	1.7387	0.0866356	0.999464	-4.20683
HkqnwPR6DUV4f9eUsc	TMEM116	transmembrane protein 116	0.0751522	0.0160185	1.73862	0.0866494	0.999464	-4.20693
TSFS_KIUhFOSK24IK4	MRPL21	mitochondrial ribosomal protein L21	0.0560529	0.0118498	1.73776	0.0868021	0.999464	-4.20809
oRj7p_O6QlgFH6d6A0	ST3GAL6	ST3 beta-galactoside alpha-2,3-sialyltransferase 6	-0.0767101	-0.0476538	-1.73775	0.0868032	0.999464	-4.2081
QXfHYVLf7Ag6ikntII	THAP1	THAP domain containing 1	-0.099928	0.0275074	-1.73773	0.0868068	0.999464	-4.20812
6l.js.1XQjzQe7vYS4	CLIP1	CAP-Gly domain containing linker protein 1	-0.0676936	-0.0529155	-1.73725	0.0868919	0.999464	-4.20877
WnurCgttU.zo7oB4p4	KRI1	KRI1 homolog	0.0783401	-0.0524081	1.73629	0.0870629	0.999464	-4.21006
BgnCcruCDoPoJUeX1Q	AASDHPPT	aminoadipate-semialdehyde dehydrogenase-phosphopantetheinyl transferase	-0.0662037	0.0347532	-1.73606	0.0871038	0.999464	-4.21036
TCf0gztLnjsk5__Q_U	RECK	reversion inducing cysteine rich protein with kazal motifs	-0.120266	-0.0282066	-1.73597	0.08712	0.999464	-4.21049
o0GIwm6C6HaNVmSXH0	CAD	carbamoyl-phosphate synthetase 2, aspartate transcarbamylase, and dihydroorotase	0.0892272	0.0514117	1.73594	0.0871259	0.999464	-4.21053
cXyv45oN5YuOmnVSo4	REX1BD	required for excision 1-B domain containing	0.078058	-0.00623461	1.73589	0.0871337	0.999464	-4.21059
BAZH7.TkomqQsK_JeE	RFC5	replication factor C subunit 5	0.0664729	-0.0055896	1.73576	0.0871578	0.999464	-4.21077
TSe7p4f0P8Ibg_ExJU	ZBTB11	zinc finger and BTB domain containing 11	-0.102452	-0.0246092	-1.73513	0.0872689	0.999464	-4.21161
0IKDp61Ip.7UdXdHoI	ZNF589	zinc finger protein 589	0.0825824	-0.00499215	1.73404	0.0874639	0.999464	-4.21307
Zd0QegRHPTqlg5bpY4	RBM19	RNA binding motif protein 19	0.165346	-0.00765858	1.7339	0.0874883	0.999464	-4.21325
ZXfuqureKgtJzAE.no	SART3	squamous cell carcinoma antigen recognized by T-cells 3	-0.101604	0.0153344	-1.73347	0.0875653	0.999464	-4.21383
H3SOCK9hKh0CXPUvpc	GLRX3	glutaredoxin 3	-0.0786318	0.0100804	-1.73323	0.0876084	0.999464	-4.21415
Ht1UXcUk3nic4lAUqM	AIF1	allograft inflammatory factor 1	0.155175	0.0209859	1.73214	0.0878036	0.999464	-4.21561
ZirTd9z7F5JGfXqe8Q	ALG13	ALG13, UDP-N-acetylglucosaminyltransferase subunit	-0.0878109	0.0324399	-1.732	0.0878287	0.999464	-4.2158
i0I6N3dlGkW0nX_6UI	FBLN1	fibulin 1	-0.0978366	-0.0260238	-1.7316	0.0879013	0.999464	-4.21634
f5l.I4RhXFRV79SaOU	PSMB8	proteasome subunit beta 8	0.120479	0.0174699	1.73153	0.0879143	0.999464	-4.21644
3lOb7J463W7CUClRIo	NUDT9	nudix hydrolase 9	0.0632673	-0.0050959	1.73118	0.0879771	0.999464	-4.21691
9nrntSEoL135x3olPI	SERPINI1	serpin family I member 1	0.0951992	0.00809041	1.73057	0.0880859	0.999464	-4.21772
xpEPRgkiggMqFkkqFk	ZRSR2	zinc finger CCCH-type, RNA binding motif and serine/arginine rich 2	-0.0976636	0.0107811	-1.73029	0.0881358	0.999464	-4.21809
x9HjuddOlCXaXUeRec	ARHGEF39	Rho guanine nucleotide exchange factor 39	0.133911	-0.0171927	1.73021	0.0881514	0.999464	-4.2182
3KkJ6KWWVK4pKYcNI8	NPEPPS	aminopeptidase puromycin sensitive	-0.148321	-0.0150308	-1.73003	0.0881824	0.999464	-4.21843
KokaNxRFPkz_EVfVSU	MGST1	microsomal glutathione S-transferase 1	0.0664037	-0.00879892	1.73001	0.0881865	0.999464	-4.21846
3J6JkCk4kIph5CJ6eA	CXorf56	chromosome X open reading frame 56	0.0881967	-0.00739308	1.72934	0.0883076	0.999464	-4.21936
EClUiJwdFfUUzihukI	FCRLA	Fc receptor like A	0.06503	-0.040842	1.72926	0.0883211	0.999464	-4.21946
fp09Hj2kn5CCud4Lik	GEMIN2	gem nuclear organelle associated protein 2	0.0637855	-0.0126567	1.72866	0.0884296	0.999464	-4.22027
cyYSYSaIYqY4MYYT7o	NFKBIB	NFKB inhibitor beta	0.0889563	-0.0243144	1.72803	0.0885437	0.999464	-4.22111
TlKmqmq5P1NfsBX0yw	JDP2	Jun dimerization protein 2	0.120848	-0.0714473	1.72797	0.0885544	0.999464	-4.22119
BqwYWft.rdwVw3ep_U	GPATCH3	G-patch domain containing 3	0.105024	-0.00151056	1.72765	0.0886128	0.999464	-4.22162
oxei.DEuJ3JCopnl.4	MAPK1	mitogen-activated protein kinase 1	0.0613136	-0.0170274	1.72758	0.0886242	0.999464	-4.22171
6vkCuir.Id059K57ao	FBXO42	F-box protein 42	-0.122469	-0.0322747	-1.72753	0.0886332	0.999464	-4.22178
KQ7qAFxbZe6HdHgTSA	ZNF334	zinc finger protein 334	0.116695	-0.0238762	1.72753	0.0886332	0.999464	-4.22178
BTTooXoRA5IQknifYo	S100A9	S100 calcium binding protein A9	0.14458	-0.0173555	1.72702	0.0887266	0.999464	-4.22247
3t7554CO3u5ezQTuH0	DENR	density regulated re-initiation and release factor	0.0565821	0.02438	1.72661	0.0887991	0.999464	-4.223
xUyEP5SjcoFFw6yuhI	PUS3	pseudouridylate synthase 3	-0.0803556	-0.000924221	-1.72631	0.0888543	0.999464	-4.22341
xlLNEzp6SaEQqs36x4	CASD1	CAS1 domain containing 1	-0.0826835	-0.0400147	-1.72623	0.0888691	0.999464	-4.22352
3QNFN.aeL246P5..eM	SNORD51	small nucleolar RNA, C/D box 51	-0.130861	-0.0254989	-1.72612	0.0888895	0.999464	-4.22367
lqVdOyUAhQgA3pUSMI	GOLGA4	golgin A4	0.0915245	-0.0304668	1.72583	0.0889417	0.999464	-4.22405
cSJ3ogDrvuu.3eq0uM	UGT2B11	UDP glucuronosyltransferase family 2 member B11	-0.0990351	0.00367361	-1.72568	0.0889684	0.999464	-4.22425
TWX7nLldiCLz53IC_I	TRAF6	TNF receptor associated factor 6	-0.103379	0.00829444	-1.72565	0.0889744	0.999464	-4.22429
TTZOhZKKkj2hRyl4Dg	COL4A1	collagen type IV alpha 1 chain	0.155169	-0.0661996	1.72547	0.0890068	0.999464	-4.22453
Wqoa1KBQxVOjFCoQew	ZNF770	zinc finger protein 770	-0.0550581	0.0104157	-1.72544	0.089011	0.999464	-4.22456
ZqSpvyx7dV.FJAXh9E	CMC2	C-X9-C motif containing 2	-0.0565001	0.00404834	-1.72539	0.0890213	0.999464	-4.22464
oewoDku75Lpf91V0X0	OPA3	OPA3, outer mitochondrial membrane lipid metabolism regulator	0.112484	-0.0220078	1.72475	0.0891365	0.999464	-4.22549
NXq3SVZsaX9GLfQl9I	TMSB15B	thymosin beta 15B	0.086808	0.00390969	1.72473	0.0891414	0.999464	-4.22552
Ki6KKelAiHup7.S0qI	STIM2	stromal interaction molecule 2	-0.111645	-0.012882	-1.72464	0.0891577	0.999464	-4.22564
fgQ1ax7FM0tf7qyysk	SPG11	SPG11, spatacsin vesicle trafficking associated	0.0648825	-0.00822499	1.72451	0.089181	0.999464	-4.22581
HbAOqtXx5PNCoCkIeo	RPL7A	ribosomal protein L7a	0.060867	0.0106478	1.72422	0.0892328	0.999464	-4.22619
3REwfFXXzB9wEK9dUs	NA	NA	0.0855515	-0.00283361	1.72242	0.0895606	0.999464	-4.22859
uuBPB.VSdpd7ahS5Ss	WFDC2	WAP four-disulfide core domain 2	-0.13461	0.037276	-1.72216	0.0896077	0.999464	-4.22894
Qllyy9XtECo5Qp8WN4	FYN	FYN proto-oncogene, Src family tyrosine kinase	0.219952	-0.0667349	1.72158	0.0897129	0.999464	-4.2297
oXT1TnyVFSJwVe331U	ZWINT	ZW10 interacting kinetochore protein	-0.168148	0.0458831	-1.72134	0.0897571	0.999464	-4.23003
o9S.Ipo.rbobrSUXSw	RPS10	ribosomal protein S10	0.05969	0.00133468	1.72115	0.0897923	0.999464	-4.23028
TXh9RjAOiOLkquLsy8	NUDT4	nudix hydrolase 4	0.137512	0.00943325	1.72104	0.0898131	0.999464	-4.23044
i4XUJ15dFt5fnXd9UA	GCHFR	GTP cyclohydrolase I feedback regulator	0.0832341	0.0154329	1.72077	0.0898609	0.999464	-4.23078
WnreoAXlc0OLO_W68U	EID1	EP300 interacting inhibitor of differentiation 1	0.080361	-0.0142387	1.72074	0.0898677	0.999464	-4.23083
0leJ4Hq_7wRPrInOPU	EPB41L5	erythrocyte membrane protein band 4.1 like 5	-0.136927	0.0184034	-1.72025	0.0899567	0.999464	-4.23148
Kf_KjDeX7Py0ipyK5I	PGBD2	piggyBac transposable element derived 2	-0.0999722	-0.0116439	-1.72023	0.0899608	0.999464	-4.23151
uF7uCSSUl8Cy1PfnDo	ATP6V1G1	ATPase H+ transporting V1 subunit G1	-0.0546702	-0.0190429	-1.72009	0.0899867	0.999464	-4.2317
lEo1VIhVP5d0EdIX0E	SF3A3	splicing factor 3a subunit 3	0.0583881	0.0404413	1.71995	0.0900117	0.999464	-4.23188
xn18p4i5VSnhN7vp.4	ZC4H2	zinc finger C4H2-type containing	0.111613	-0.0202778	1.7192	0.090148	0.999464	-4.23287
x6gOLnSojonyqK6ufU	PSMB9	proteasome subunit beta 9	-0.10757	-0.0827567	-1.71916	0.0901555	0.999464	-4.23293
ZjxeiXolH8L7H3hwHo	ABCE1	ATP binding cassette subfamily E member 1	-0.051014	0.0227815	-1.71915	0.090158	0.999464	-4.23294
QRw5Snhu36LunIQLpI	PAK1IP1	PAK1 interacting protein 1	-0.0689235	-0.00573653	-1.71897	0.0901918	0.999464	-4.23319
9eHhRVdIkSNKhdGTd8	TUBG1	tubulin gamma 1	0.0770124	-0.0186406	1.71893	0.090199	0.999464	-4.23324
rjoMglfvnsjubkt6SU	PTP4A2	protein tyrosine phosphatase type IVA, member 2	-0.0547664	-0.000842859	-1.71872	0.0902361	0.999464	-4.23351
fSga6TpuqgH6L6CunA	STAG3L2	stromal antigen 3-like 2 (pseudogene)	-0.141011	0.0121132	-1.71867	0.0902454	0.999464	-4.23358
l7rgikgWK2olT47eJc	LAMTOR4	late endosomal/lysosomal adaptor, MAPK and MTOR activator 4	0.072643	-0.00777838	1.71843	0.0902892	0.999464	-4.23389
o57uHOPXCP1KnwqcH0	MAP3K1	mitogen-activated protein kinase kinase kinase 1	-0.0681403	0.00932409	-1.71828	0.0903171	0.999464	-4.2341
ZtKfs43PXxRAILIQ_U	SOCS4	suppressor of cytokine signaling 4	0.135995	-0.0262057	1.71751	0.0904584	0.999464	-4.23512
6v0IiP70eVJ2.7teJU	SCD5	stearoyl-CoA desaturase 5	-0.175777	-0.0460307	-1.71709	0.0905353	0.999464	-4.23568
0JI6Y5KFJenYoJZong	RPS19BP1	ribosomal protein S19 binding protein 1	-0.0737263	0.0326871	-1.717	0.0905519	0.999464	-4.2358
6JBMuKNU3cZUV1VaQA	GALNT6	polypeptide N-acetylgalactosaminyltransferase 6	0.128412	-0.0508187	1.71657	0.0906324	0.999464	-4.23638
l86KKaV68d6KCSKc6A	HNRNPA1	heterogeneous nuclear ribonucleoprotein A1	0.0977801	0.0224577	1.71647	0.0906507	0.999464	-4.23651
Nnunn0fI5LiETL671g	ERRFI1	ERBB receptor feedback inhibitor 1	-0.120067	0.0107489	-1.71623	0.090694	0.999464	-4.23682
rS4URJ11OXhQSlSf1c	MRPL28	mitochondrial ribosomal protein L28	0.105362	7.64586e-05	1.71505	0.0909109	0.999464	-4.23838
3iPkKmqIop3QwMNuwU	FDPS	farnesyl diphosphate synthase	-0.08002	-0.0305584	-1.71478	0.0909613	0.999464	-4.23875
ZRF7qm9P.dZ1IKM4UU	AGO3	argonaute 3, RISC catalytic component	0.110277	0.0115348	1.71472	0.0909727	0.999464	-4.23883
ceieelhe7iBOhDlkh8	HSPBP1	HSPA (Hsp70) binding protein 1	-0.141988	0.0209032	-1.71457	0.0910009	0.999464	-4.23903
HoBSf3rwrwRSOuVdPo	TSPAN3	tetraspanin 3	0.0558152	0.0150505	1.71423	0.0910633	0.999464	-4.23948
uYRwCXvvVN5lpdbTg4	LIPE	lipase E, hormone sensitive type	0.149335	-0.0110707	1.71415	0.0910783	0.999464	-4.23959
EXhErunHoql9MXmlUA	TMEM129	transmembrane protein 129	-0.140572	-0.0319348	-1.71414	0.0910789	0.999464	-4.23959
TfX8Kh7N.L04VNNJ5c	BBOF1	basal body orientation factor 1	0.135717	-0.0491219	1.71368	0.0911639	0.999464	-4.2402
BgSfotO.E3L3Hha9U0	LOC100240735	uncharacterized LOC100240735	0.0832216	0.00406615	1.71368	0.0911645	0.999464	-4.2402
Wegr.fudqIguKglpLU	CLUHP3	clustered mitochondria homolog pseudogene 3	-0.168661	-0.0755288	-1.71346	0.0912062	0.999464	-4.2405
WI7KsS6BMJLvFXp6i0	FRMD6	FERM domain containing 6	0.140587	-0.0425007	1.71342	0.0912126	0.999464	-4.24055
BLXpdZI59P_Ffp5LoI	WARS	tryptophanyl-tRNA synthetase	0.0826349	-0.0709858	1.71213	0.0914516	0.999464	-4.24226
r.kDwC6qSK6mjReK0o	RBM3	RNA binding motif protein 3	0.125957	-0.0228251	1.71177	0.0915184	0.999464	-4.24274
fQbX2EuV1lEh.laXTc	ARID5A	AT-rich interaction domain 5A	-0.0952095	0.0510756	-1.71147	0.091574	0.999464	-4.24313
Bhnt0F1F2aaBWKEol0	BTF3	basic transcription factor 3	0.0727008	0.0119046	1.71128	0.0916098	0.999464	-4.24339
Z_OQlcBHf2HUiiCekk	TXLNGY	taxilin gamma pseudogene, Y-linked	0.124863	-0.0313908	1.71069	0.0917186	0.999464	-4.24416
0UJD25LqOJx.lJyKWU	DCTN3	dynactin subunit 3	0.058048	0.0118789	1.71061	0.0917339	0.999464	-4.24427
fF5976WihjleBd_iX8	C17orf97	chromosome 17 open reading frame 97	0.129773	-0.0162398	1.71042	0.0917696	0.999464	-4.24453
f5ISLpTs7k5MxHcS54	PSMA3	proteasome subunit alpha 3	-0.0686401	-0.0248239	-1.71019	0.0918113	0.999464	-4.24482
QREIBTd43l7nBUngQ4	ST7L	suppression of tumorigenicity 7 like	-0.112234	-0.0189145	-1.71009	0.0918302	0.999464	-4.24496
WpeSSi65ISC3XQ._3Q	RASSF1	Ras association domain family member 1	0.102042	0.0448	1.71	0.0918478	0.999464	-4.24508
WdflJVFVK._VNdUN0M	CTSW	cathepsin W	-0.176869	0.0625705	-1.70944	0.0919514	0.999464	-4.24582
xinjtCRRFUFUm3bi1g	PDGFRL	platelet derived growth factor receptor like	-0.148088	0.00321055	-1.70906	0.0920215	0.999464	-4.24632
HUruR6C4rROJJuoIIc	XYLT2	xylosyltransferase 2	-0.0607533	-0.00115892	-1.70883	0.0920652	0.999464	-4.24663
NcIKgflNCPXsUpUaW0	SIN3B	SIN3 transcription regulator family member B	0.0874657	-0.0238671	1.70786	0.0922464	0.999464	-4.24791
KyiOkWAmCgnXnXXAlg	RPL23AP7	ribosomal protein L23a pseudogene 7	-0.0762362	-0.00107913	-1.70756	0.0923015	0.999464	-4.2483
fowE6Ybd5OKhUYFJ6M	ELF2	E74 like ETS transcription factor 2	-0.12056	-0.0210941	-1.70728	0.0923539	0.999464	-4.24867
TGtKt9_YVpWdSNVEnc	UNC93B1	unc-93 homolog B1, TLR signaling regulator	-0.0621174	0.0639037	-1.70726	0.0923575	0.999464	-4.2487
lT2M6FFF0neaF.6l2k	MIA3	MIA family member 3, ER export factor	0.102517	0.0516175	1.70666	0.0924706	0.999464	-4.2495
xycXf70.CRSwI07f.A	NNT	nicotinamide nucleotide transhydrogenase	0.149926	0.0182687	1.70656	0.0924891	0.999464	-4.24963
TN9VNamUSCRtF9xShc	THOC6	THO complex 6	0.0817429	0.00795577	1.70564	0.092661	0.999464	-4.25084
WiYU99fJKFcke0SF6I	SNORD14D	small nucleolar RNA, C/D box 14D	0.129349	-0.0809385	1.70458	0.0928596	0.999464	-4.25224
EfRM3kFIklFCTx8kko	WDR82	WD repeat domain 82	-0.102945	-0.0267353	-1.70438	0.0928969	0.999464	-4.2525
NhY5VWKqd1UnwH__.A	PER3	period circadian regulator 3	-0.137118	-0.0257284	-1.70437	0.0928991	0.999464	-4.25252
o_6dVarNGX.HlGiDlc	BMP2	bone morphogenetic protein 2	-0.14464	0.0224188	-1.70437	0.0928994	0.999464	-4.25252
NGeemdOpXrv5Fkf7DQ	GAK	cyclin G associated kinase	-0.0593562	-0.00865033	-1.70316	0.0931262	0.999464	-4.25411
E_iCdZElpVci30gEig	RRBP1	ribosome binding protein 1	-0.0997208	-0.0218108	-1.70283	0.0931881	0.999464	-4.25454
f8B5oO6XefXW115UKE	BAZ1B	bromodomain adjacent to zinc finger domain 1B	0.061131	0.00201982	1.70244	0.0932617	0.999464	-4.25506
QhHlwIysgynsn4.Hug	ING3	inhibitor of growth family member 3	-0.167995	0.0165356	-1.7024	0.0932697	0.999464	-4.25511
KRFX.U.CFece7giOMc	KCNMB2	potassium calcium-activated channel subfamily M regulatory beta subunit 2	0.147203	-0.018701	1.70224	0.0933003	0.999464	-4.25533
liiOaCdSlGuSidSCZ8	LOC606724	coronin 1A pseudogene	0.0627359	0.0170621	1.70181	0.0933813	0.999464	-4.25589
cmVBdX09CRP8alxKgo	LINC00294	long intergenic non-protein coding RNA 294	0.0683174	-0.0130143	1.70138	0.0934627	0.999464	-4.25646
WF9nJzuPpeqefdekec	SMPD2	sphingomyelin phosphodiesterase 2	-0.116136	-0.0495787	-1.70071	0.0935876	0.999464	-4.25733
xO1_IgFCz_JUnl6OX0	GSTM2	glutathione S-transferase mu 2	0.104666	-0.062264	1.70062	0.0936063	0.999464	-4.25746
lRZJJCgJ0YFUBekLRc	PRDM2	PR/SET domain 2	-0.140146	-0.00923131	-1.70024	0.0936765	0.999464	-4.25795
TrU1SkesflV_97NVf4	PBXIP1	PBX homeobox interacting protein 1	-0.125754	0.0150327	-1.6988	0.093949	0.999464	-4.25985
KXlOxSLUOKdYL0FPS0	HTR2B	5-hydroxytryptamine receptor 2B	0.109109	0.0255416	1.69869	0.0939713	0.999464	-4.26
3enAQXhAe6UqgWEQV0	TBC1D8	TBC1 domain family member 8	-0.135226	-0.0890494	-1.69842	0.094021	0.999464	-4.26035
opCY0JJhzkQYij.ink	POU5F1B	POU class 5 homeobox 1B	0.115369	-0.0933058	1.69822	0.0940606	0.999464	-4.26062
flAg_ssqogSIonqc6g	S100A14	S100 calcium binding protein A14	-0.14154	-0.00585355	-1.69742	0.0942122	0.999464	-4.26167
cSlaeg5_T.fl4.V6iQ	ZNF490	zinc finger protein 490	0.0904251	0.0278273	1.69733	0.0942293	0.999464	-4.26179
Wf_S0NV51zX6VekBHo	METTL4	methyltransferase like 4	0.0691728	-0.0056979	1.6973	0.0942345	0.999464	-4.26183
rpStFf57intexPuo70	CASP9	caspase 9	0.0863797	-0.0111132	1.69714	0.0942657	0.999464	-4.26204
WSemIeyVXVHVEdHfkg	CENPM	centromere protein M	0.0609933	0.0235695	1.69691	0.0943092	0.999464	-4.26234
3S3ZjB5kpmhQJjd94o	RPS15	ribosomal protein S15	0.0854764	0.0246691	1.69658	0.0943719	0.999464	-4.26278
T4CiS6Vm4_6T8KJLpU	TPK1	thiamin pyrophosphokinase 1	0.0692758	0.000827505	1.69565	0.0945484	0.999464	-4.26399
KlSpZXJB9exM4ewDrA	RAI1	retinoic acid induced 1	-0.0669507	-0.0070662	-1.69533	0.0946091	0.999464	-4.26441
TigfSilCiC8lJciIgk	IFT81	intraflagellar transport 81	-0.146496	-0.00478577	-1.69481	0.0947092	0.999464	-4.2651
orn7qnqLkhPrv3njtU	MZB1	marginal zone B and B1 cell specific protein	-0.106884	-0.0421531	-1.69458	0.0947531	0.999464	-4.2654
6eK7Ey19WlM8FESXiU	DNM2	dynamin 2	0.0936649	-0.0221937	1.69427	0.0948108	0.999464	-4.2658
3WSCIjnneleong9QlQ	STRADA	STE20-related kinase adaptor alpha	0.109334	-0.0274006	1.69404	0.0948545	0.999464	-4.2661
rV0XE9TLqVuqdeuTfA	TSPAN4	tetraspanin 4	0.074335	-0.0565353	1.69401	0.0948606	0.999464	-4.26614
6PUmKK6yqpc6B6cfoQ	DHX9	DExH-box helicase 9	0.111164	0.00646282	1.694	0.0948626	0.999464	-4.26616
cKgKgtuiKSoA68JJWk	CCNY	cyclin Y	0.077635	0.0109057	1.69392	0.0948785	0.999464	-4.26627
Trc1Y6p.17JeRNvoBk	SNORA18	small nucleolar RNA, H/ACA box 18	-0.0808328	0.0107215	-1.69382	0.0948978	0.999464	-4.2664
0U6lHv0kF0lLkEQXSU	CASC15	cancer susceptibility 15 (non-protein coding)	-0.23087	0.0824315	-1.69338	0.0949811	0.999464	-4.26697
fVIPviqo0L5IOMSMsQ	ZNF146	zinc finger protein 146	0.134187	-0.0205135	1.69336	0.0949861	0.999464	-4.267
r4o5Dl3jal4Bfr_U4I	ARID4A	AT-rich interaction domain 4A	0.11797	-0.0270268	1.69321	0.0950134	0.999464	-4.26719
TSilf_Qp8q7pSV4Ccc	ABHD14B	abhydrolase domain containing 14B	0.103434	-0.00286521	1.69312	0.0950308	0.999464	-4.26731
WoK7je6h7epe8dNec0	FAM129A	family with sequence similarity 129 member A	-0.116437	0.0367212	-1.69259	0.0951321	0.999464	-4.268
QVG6keeICUfrAHjloA	SNORD35B	small nucleolar RNA, C/D box 35B	-0.105027	0.0441904	-1.69159	0.0953248	0.999464	-4.26932
T_bfHe90mEvl57Swno	SNORD16	small nucleolar RNA, C/D box 16	0.0814273	0.0309786	1.69073	0.0954886	0.999464	-4.27044
BXecb1z7TwKzRrZRek	NFKB1	nuclear factor kappa B subunit 1	-0.0520024	0.0101147	-1.69071	0.0954939	0.999464	-4.27048
QqAk9K.J9SdLSTSLtQ	ZNF23	zinc finger protein 23	-0.0780189	0.0103931	-1.68967	0.0956933	0.999464	-4.27183
rSVF0c656siqMXq9wU	ZDHHC5	zinc finger DHHC-type containing 5	-0.0902635	0.00211264	-1.68953	0.0957194	0.999464	-4.27201
rXKXUFM6WElBeucdAs	RGS22	regulator of G protein signaling 22	-0.162419	0.00199051	-1.68943	0.0957394	0.999464	-4.27215
N05UXZUgXgeXmjt0Z8	FAM212A	family with sequence similarity 212 member A	-0.0901989	-0.0481365	-1.68943	0.09574	0.999464	-4.27215
NUSgsB59IlRLVedLtY	SLC25A15	solute carrier family 25 member 15	0.0704692	0.0219736	1.68941	0.0957438	0.999464	-4.27218
cgnoldd_gz0lwgXTKE	ZC3H4	zinc finger CCCH-type containing 4	0.073463	0.00197547	1.6886	0.0958986	0.999464	-4.27323
3IISX6tmPuqfYItSS4	MRE11	MRE11 homolog, double strand break repair nuclease	-0.104565	0.0225986	-1.68856	0.0959066	0.999464	-4.27328
fl9KnnaLRe_g6HAKFc	MXD3	MAX dimerization protein 3	0.110632	0.056546	1.68838	0.0959422	0.999464	-4.27353
QV15Xe1PfIkxfTUdTk	FAM222B	family with sequence similarity 222 member B	-0.0687267	-0.0233837	-1.68789	0.0960354	0.999464	-4.27416
BinUhTrEgRQJYHRkdU	NIN	ninein	-0.0771047	0.0248713	-1.68787	0.0960403	0.999464	-4.27419
6qgAsgUkQOLpL56JME	TPP2	tripeptidyl peptidase 2	-0.111326	0.0227418	-1.68782	0.09605	0.999464	-4.27426
K1Imtl1Ov6Ci7.cSjU	MIPEP	mitochondrial intermediate peptidase	0.100736	0.0337753	1.68778	0.0960573	0.999464	-4.27431
QrfotBVJV0CRXl0OiE	RASAL3	RAS protein activator like 3	0.0956169	0.0596989	1.68739	0.096133	0.999464	-4.27482
N56p5OP.lebV93_qdc	RXRB	retinoid X receptor beta	-0.0632291	0.0125621	-1.68658	0.0962883	0.999464	-4.27587
3pCgkvUqItK9ScvKnk	HYAL3	hyaluronoglucosaminidase 3	0.100534	0.033864	1.68638	0.0963271	0.999464	-4.27613
rtcwORde0AU5eIrVp4	RRP1B	ribosomal RNA processing 1B	-0.0823611	-0.0163611	-1.68629	0.0963447	0.999464	-4.27625
06lKHneI.ioBOhX.pU	PLEKHH3	pleckstrin homology, MyTH4 and FERM domain containing H3	-0.0832788	-0.0632791	-1.68604	0.0963926	0.999464	-4.27657
3RcB3o3S0X.tcT13Fc	DTD2	D-tyrosyl-tRNA deacylase 2 (putative)	0.10529	0.0168845	1.68558	0.0964819	0.999464	-4.27718
6ksdcqA6XeCzNL9N3w	TC2N	tandem C2 domains, nuclear	-0.140059	-0.0648199	-1.68541	0.0965152	0.999464	-4.2774
fonSKGqIyB7pHyqI4Q	EPM2A	EPM2A, laforin glucan phosphatase	0.123526	0.0379011	1.68529	0.0965394	0.999464	-4.27756
BSqHirn4so7iH06l6s	GPC2	glypican 2	0.114645	-0.045784	1.68513	0.0965695	0.999464	-4.27777
Th97_OnxJBSx0EJJ4c	SNX14	sorting nexin 14	-0.0624613	-0.0523595	-1.68405	0.0967783	0.999464	-4.27917
0rv53XCJfTkRV4FGKA	PGRMC1	progesterone receptor membrane component 1	-0.0537167	0.0197078	-1.68338	0.096909	0.999464	-4.28005
fIcSejJ5X8JfojqijU	WDR75	WD repeat domain 75	-0.0555907	0.00948512	-1.68333	0.0969189	0.999464	-4.28012
94nyAqK6aOi6guIhHg	GCDH	glutaryl-CoA dehydrogenase	0.0830845	-0.039924	1.68321	0.0969415	0.999464	-4.28027
fKHkMiKkPxXrrEaBcg	ABCA12	ATP binding cassette subfamily A member 12	0.198917	0.0777887	1.68254	0.0970724	0.999464	-4.28115
Zi37qdILA97gJ6GjLY	NADK2	NAD kinase 2, mitochondrial	0.125471	0.0242143	1.68251	0.0970776	0.999464	-4.28118
0DRJ3qABBgH9X7oiio	FLI1	Fli-1 proto-oncogene, ETS transcription factor	-0.0864969	-0.00038364	-1.68235	0.09711	0.999464	-4.2814
HaYzcA1psteKIEuVVM	MICA	MHC class I polypeptide-related sequence A	0.0992914	-0.0825971	1.68229	0.0971206	0.999464	-4.28147
6rp_u9OuiH69.GSJKc	DNAJC30	DnaJ heat shock protein family (Hsp40) member C30	0.114881	0.00431355	1.68192	0.0971924	0.999464	-4.28195
udUL4KvfVMlSFFejl0	SNUPN	snurportin 1	-0.057469	0.0220255	-1.68179	0.0972194	0.999464	-4.28213
urk.B5.fTU4YT1RTqo	S100PBP	S100P binding protein	0.0489315	-0.0310996	1.68076	0.0974194	0.999464	-4.28346
iX1F56pFPfLMSK6XxE	EPHX2	epoxide hydrolase 2	0.07381	-0.0159345	1.68058	0.0974551	0.999464	-4.2837
iq7yfiOvArr_qKh9vs	YWHAE	tyrosine 3-monooxygenase/tryptophan 5-monooxygenase activation protein epsilon	0.116371	0.00557982	1.67912	0.0977402	0.999464	-4.2856
3jfUJUTUpSUKzTklXI	FIG4	FIG4 phosphoinositide 5-phosphatase	0.0670287	0.0120298	1.67911	0.097742	0.999464	-4.28561
HVJpXf17e7A_9bglmc	CELSR3	cadherin EGF LAG seven-pass G-type receptor 3	-0.122812	0.0496835	-1.67891	0.0977807	0.999464	-4.28587
0okqkpgXf3_SFgS4Ak	ARHGAP17	Rho GTPase activating protein 17	0.0789794	-0.0313296	1.67885	0.0977938	0.999464	-4.28596
oO3ZwwVSc_3vu9J4jk	GPR180	G protein-coupled receptor 180	-0.0785707	0.00249387	-1.67811	0.0979388	0.999464	-4.28692
lVSuL94mTGy_vfFVK4	DDX19A	DEAD-box helicase 19A	0.0900321	0.020318	1.67793	0.097973	0.999464	-4.28715
oJOLc0jqjuuo.hOi6U	WRN	Werner syndrome RecQ like helicase	0.190083	-0.00937172	1.67635	0.0982825	0.999464	-4.2892
xna_3uqS3Ci9eQN3jk	TRIM69	tripartite motif containing 69	-0.0862356	-0.0199664	-1.6755	0.0984499	0.999464	-4.2903
BUZICdG5eSpSgKgONs	EMC8	ER membrane protein complex subunit 8	-0.0911001	0.0478441	-1.67441	0.0986646	0.999464	-4.29172
o4VUSopKAElIJRfhH8	DHRS3	dehydrogenase/reductase 3	-0.131189	0.0155106	-1.67416	0.098714	0.999464	-4.29204
QU3eoPu6s8O.U71Qc4	SLTM	SAFB like transcription modulator	-0.0610573	-0.0241271	-1.67416	0.0987152	0.999464	-4.29205
3tFgoAgUouyKOOKKtE	CLK1	CDC like kinase 1	-0.104674	0.0376834	-1.67403	0.0987404	0.999464	-4.29222
x3CPeeKJVZ61d6k57k	ECHS1	enoyl-CoA hydratase, short chain 1	0.059267	0.0182551	1.67352	0.0988421	0.999464	-4.29288
lN97qVfVIRaNTqRwVk	MIGA2	mitoguardin 2	-0.117674	-0.0115145	-1.67337	0.0988701	0.999464	-4.29307
0u_PeQia_P_j4s17r0	SCAMP1	secretory carrier membrane protein 1	-0.0988538	0.0263815	-1.67328	0.0988895	0.999464	-4.2932
QoQ485wnqXi.rr1KKo	NAPG	NSF attachment protein gamma	0.11133	0.0567724	1.67269	0.0990055	0.999464	-4.29396
iip84p7gFSJ3wZ7hQI	SNORA25	small nucleolar RNA, H/ACA box 25	-0.1224	-0.0375797	-1.67255	0.0990333	0.999464	-4.29414
6qRei_PSeSellS.iD4	GUSBP2	glucuronidase, beta pseudogene 2	0.082724	0.0073193	1.67251	0.0990404	0.999464	-4.29419
iKkl3vpeKt6Gf.Pzlw	DCAF15	DDB1 and CUL4 associated factor 15	0.0828625	-0.0292385	1.6722	0.0991024	0.999464	-4.29459
rLhAS3msHg10irEs18	TERF1	telomeric repeat binding factor 1	-0.115708	-0.031688	-1.67201	0.0991398	0.999464	-4.29484
Bi95SVai3iezSCis1Q	POLD1	DNA polymerase delta 1, catalytic subunit	0.0925059	-0.00964133	1.67177	0.0991869	0.999464	-4.29515
fai.aRIc1TQlvp1.Sc	ZMYND8	zinc finger MYND-type containing 8	0.0712581	-0.00216606	1.67138	0.0992644	0.999464	-4.29565
r5I7oecDkp433Vf6j0	MIR1253	microRNA 1253	-0.133047	-0.00307619	-1.67103	0.0993342	0.999464	-4.29611
6nngsu.KNdTpLy4Owg	CCNG1	cyclin G1	-0.0830831	-0.00456477	-1.6706	0.0994194	0.999464	-4.29667
0lLf.0_GVSPVSUbyXE	NUBP1	nucleotide binding protein 1	0.0619177	0.00808118	1.67051	0.099437	0.999464	-4.29678
Bp_tySwRS7eoI5e_QI	C8orf33	chromosome 8 open reading frame 33	0.0844256	0.0649921	1.67048	0.099444	0.999464	-4.29683
Th98r4X6X4XUUcnThU	ZNF252P	zinc finger protein 252, pseudogene	0.0620333	-0.0189354	1.67037	0.099465	0.999464	-4.29696
rwVxJkoI2llmkp3jno	FAHD2A	fumarylacetoacetate hydrolase domain containing 2A	0.134067	-0.0227675	1.66996	0.0995457	0.999464	-4.29749
lXu37l6iLqOAZRIkl4	ODC1	ornithine decarboxylase 1	0.0757557	0.0160063	1.66978	0.0995824	0.999464	-4.29773
u7tdb09Tp6i0eOeXeU	TAGLN2	transgelin 2	0.0648429	0.0243144	1.66928	0.0996811	0.999464	-4.29837
K.b_LXnvrtokYqika4	BANP	BTG3 associated nuclear protein	-0.0996391	-0.0301147	-1.66845	0.0998477	0.999464	-4.29945
B66i6rrqz.__Ofy5KU	CCDC47	coiled-coil domain containing 47	-0.0760101	-0.0309676	-1.66823	0.0998908	0.999464	-4.29973
BSwYp.47vieiuLoWqk	TRAFD1	TRAF-type zinc finger domain containing 1	0.0826975	-0.000624398	1.66821	0.0998955	0.999464	-4.29976
c1XXqtNXUd4d4c6SSA	DHRS11	dehydrogenase/reductase 11	0.0729617	0.0147559	1.66813	0.09991	0.999464	-4.29986
QolbgcYGLiIMy0gLXo	TTC9C	tetratricopeptide repeat domain 9C	-0.108449	-0.00565336	-1.66797	0.099942	0.999464	-4.30007
0tNiSSXt_7iu95ajIA	GGT1	gamma-glutamyltransferase 1	0.110866	-0.00997985	1.66765	0.100007	0.999464	-4.30049
9KShpKriSf6iIRel.8	ZER1	zyg-11 related cell cycle regulator	-0.112595	-0.0134528	-1.66763	0.100011	0.999464	-4.30052
Honl6oU7QzJ7ULmKqU	IGFBPL1	insulin like growth factor binding protein like 1	0.132524	-0.0233892	1.66756	0.100024	0.999464	-4.3006
iAy3e6StHqoQ7Ek96U	SV2B	synaptic vesicle glycoprotein 2B	0.186115	-0.0273209	1.66717	0.100102	0.999464	-4.3011
3UhRFBarFEiX_SNLQs	ZBTB25	zinc finger and BTB domain containing 25	-0.143521	-0.039364	-1.6667	0.100195	0.999464	-4.30171
lpbdRSAFNlB15jSfuE	ALDH3B2	aldehyde dehydrogenase 3 family member B2	0.190576	-0.00580982	1.66625	0.100286	0.999464	-4.30229
l11UXKUbuJ517d7fPk	TUBB3	tubulin beta 3 class III	-0.155695	-0.131446	-1.66624	0.100287	0.999464	-4.3023
WuXQtT9_o2dv65Hduo	LPP	LIM domain containing preferred translocation partner in lipoma	-0.130654	-0.0169399	-1.66602	0.100332	0.999464	-4.30259
Kngj91PXrniDApBSyU	PHLDB2	pleckstrin homology like domain family B member 2	0.165591	-0.0280556	1.66602	0.100332	0.999464	-4.3026
HgL7q0nhSsij0IdDug	PAWR	pro-apoptotic WT1 regulator	-0.0907008	0.0074907	-1.66542	0.100451	0.999464	-4.30336
97oORAPuyueDnsKL8o	ITM2A	integral membrane protein 2A	-0.137414	-0.011585	-1.66533	0.10047	0.999464	-4.30348
rV99EXHR.EH_dcHur4	MLLT11	MLLT11, transcription factor 7 cofactor	-0.0700728	-0.0520901	-1.66505	0.100526	0.999464	-4.30384
KkCW8s3nZNUfxNIvSE	ZNF195	zinc finger protein 195	0.0898564	-0.0164144	1.66488	0.10056	0.999464	-4.30406
WVigLdLUBF0O1AyaXY	CACNB1	calcium voltage-gated channel auxiliary subunit beta 1	0.172039	-0.0312636	1.66427	0.100683	0.999464	-4.30485
iZauVnkv36hMomQIJw	CEBPD	CCAAT/enhancer binding protein delta	-0.0921902	-0.0133961	-1.66406	0.100724	0.999464	-4.30512
ch1ejw57sVupCuVg90	C9orf72	chromosome 9 open reading frame 72	-0.10922	-0.0405842	-1.66382	0.100771	0.999464	-4.30543
BlCnegODaBSKjUEOKU	CTR9	CTR9 homolog, Paf1/RNA polymerase II complex component	0.0730939	0.0174727	1.66377	0.100783	0.999464	-4.3055
c9Pl_7XedaiH2uPeUc	ZNF519	zinc finger protein 519	0.0796568	0.0308832	1.66344	0.100849	0.999464	-4.30593
uZ39y5CAeSno0svQSc	JAZF1	JAZF zinc finger 1	-0.124903	-0.00866911	-1.6631	0.100917	0.999464	-4.30636
iJL14aJ4Uh.1ILlobY	SRP14	signal recognition particle 14	0.0533224	0.0243205	1.66306	0.100925	0.999464	-4.30641
isVFaz1wDXACMRfksk	MOSPD2	motile sperm domain containing 2	-0.0964581	0.0042789	-1.66298	0.10094	0.999464	-4.30651
ZrSXru1JbVBS5wCV7s	SPATA31D1	SPATA31 subfamily D member 1	-0.220455	-0.0118348	-1.66279	0.100979	0.999464	-4.30676
c_VPae6MiCSgiR6H6I	YWHAB	tyrosine 3-monooxygenase/tryptophan 5-monooxygenase activation protein beta	-0.0914365	0.0753556	-1.66218	0.101103	0.999464	-4.30755
BlcG0.J__3jl1LKEXU	LMO3	LIM domain only 3	0.092915	-0.00435853	1.66191	0.101156	0.999464	-4.3079
NkX0P5TbhkhezA8rwI	CXorf40B	chromosome X open reading frame 40B	-0.0741635	-0.0169755	-1.66118	0.101302	0.999464	-4.30883
WV75H6een1XTXe94L8	ZNF230	zinc finger protein 230	-0.110833	-0.0598091	-1.66111	0.101318	0.999464	-4.30893
WeV_fBDlpQemF0a_R8	SLC25A25	solute carrier family 25 member 25	-0.0698378	-0.0243117	-1.66071	0.101398	0.999464	-4.30944
HG66K26IImImtIXVF8	NCF1B	neutrophil cytosolic factor 1B pseudogene	0.104407	0.00082843	1.66003	0.101536	0.999464	-4.31032
K0L4R51G55EL1r1CXk	TBXAS1	thromboxane A synthase 1	0.0945165	-0.0433597	1.6594	0.101662	0.999464	-4.31113
fX87ba60dKt9c3gxLk	KLHL28	kelch like family member 28	-0.108261	0.0218274	-1.65912	0.101719	0.999464	-4.31149
iXs7STZTZnQNfZfTXs	SLCO3A1	solute carrier organic anion transporter family member 3A1	-0.165251	-0.0356196	-1.65912	0.10172	0.999464	-4.31149
fjhRTne7SUoYKiE3q4	TGFBRAP1	transforming growth factor beta receptor associated protein 1	-0.153906	-0.00785558	-1.65885	0.101773	0.999464	-4.31184
Wd2fnd3RTuER6dV9F8	COX15	COX15, cytochrome c oxidase assembly homolog	0.109743	0.010388	1.65836	0.101873	0.999464	-4.31247
cXUUeXXUV33ojLD3T8	NAF1	nuclear assembly factor 1 ribonucleoprotein	0.0754465	-0.0169063	1.65799	0.101947	0.999464	-4.31294
Nnf_8yrOjT7SB_Poqs	AFTPH	aftiphilin	-0.087274	-0.0327981	-1.6578	0.101985	0.999464	-4.31318
HhXkL490_Uj1PFf310	USP6	ubiquitin specific peptidase 6	0.132004	-0.0150264	1.65727	0.102095	0.999464	-4.31388
0VTO3tX6Mq4p4JFKiA	VPS25	vacuolar protein sorting 25 homolog	0.0567581	0.020908	1.65711	0.102127	0.999464	-4.31408
HCOEKKtF67lo2mPp1A	CLK3	CDC like kinase 3	0.111838	-0.01772	1.65687	0.102176	0.999464	-4.31439
x6WHZi4oAgoCpIetmA	WAC	WW domain containing adaptor with coiled-coil	0.155269	0.0178456	1.65496	0.102563	0.999464	-4.31684
Td4gleJxfqt6rq.eoA	RTEL1	regulator of telomere elongation helicase 1	0.13633	0.041153	1.65475	0.102605	0.999464	-4.31711
fVfRfUqGS_8YryG6Sc	COA3	cytochrome c oxidase assembly factor 3	0.0561106	0.0210561	1.65474	0.102607	0.999464	-4.31712
faIOVS7uFjtpIAdgsU	USP21	ubiquitin specific peptidase 21	0.084659	0.0134834	1.65452	0.102653	0.999464	-4.31741
EXeLT7ie7rK_hPpMvo	RBSN	rabenosyn, RAB effector	-0.0620658	0.00765378	-1.65441	0.102674	0.999464	-4.31754
rlHuVRf9er9MKN4Lro	CNBP	CCHC-type zinc finger nucleic acid binding protein	0.0846308	0.0122751	1.65428	0.102701	0.999464	-4.31771
Be9JXOXCFXOeqEcSkQ	CENPO	centromere protein O	0.120566	0.00159762	1.65405	0.102749	0.999464	-4.31801
HEvvqJ4lolIHRD0W6U	ZNF764	zinc finger protein 764	-0.134398	-0.0432424	-1.65392	0.102775	0.999464	-4.31818
HpR_L_11CrK7dP73pU	SNRNP70	small nuclear ribonucleoprotein U1 subunit 70	0.0441963	0.00939512	1.65315	0.102931	0.999464	-4.31916
xlHI6S5ezI6oAD5RT0	SSR3	signal sequence receptor subunit 3	-0.0868463	0.0319835	-1.65305	0.102953	0.999464	-4.31929
uiddy_e_v.feeUF7h0	BIVM	basic, immunoglobulin-like variable motif containing	0.0607531	0.01208	1.65301	0.10296	0.999464	-4.31934
ckvq9KgOo_H6X0p1.o	ACTR2	ARP2 actin related protein 2 homolog	0.0776107	0.00590486	1.65291	0.102981	0.999464	-4.31947
uEJV7aLfSOl6Aft5Uk	SLCO4A1	solute carrier organic anion transporter family member 4A1	-0.102482	-0.0538128	-1.65285	0.102993	0.999464	-4.31955
WGWVF51_.5Liq1JV4s	LCNL1	lipocalin like 1	-0.142352	-0.0771596	-1.65251	0.103062	0.999464	-4.31998
liUm8iEIle4AKUCUSU	NPM2	nucleophosmin/nucleoplasmin 2	0.129749	-0.0250441	1.65228	0.10311	0.999464	-4.32028
EQklMeOFEkFJ1Gl45I	CTSA	cathepsin A	0.08305	-0.0258111	1.65201	0.103166	0.999464	-4.32063
EpJ.1qukppEvorByj8	DOT1L	DOT1 like histone lysine methyltransferase	0.127548	-0.0686302	1.65178	0.103211	0.999464	-4.32092
l6J.qOJUm6K0TF0IJI	CNPY4	canopy FGF signaling regulator 4	-0.153237	-0.0376392	-1.6517	0.103228	0.999464	-4.32102
HRHtFKvP5NQqJ6D4sU	BAMBI	BMP and activin membrane bound inhibitor	-0.107637	0.000889329	-1.65162	0.103244	0.999464	-4.32112
0tMly5PHRu3uiOeuwE	B3GALNT1	beta-1,3-N-acetylgalactosaminyltransferase 1 (globoside blood group)	0.083917	0.00548546	1.65103	0.103365	0.999464	-4.32188
6RqbXHiT464o6T7Wzo	SUPT5H	SPT5 homolog, DSIF elongation factor subunit	0.0559991	0.0148681	1.65089	0.103393	0.999464	-4.32206
T3QacRV9GQikpNotSQ	UCK2	uridine-cytidine kinase 2	-0.0790067	0.000295748	-1.65048	0.103478	0.999464	-4.32259
op9CKam5Xei1XFOHgo	ADAM15	ADAM metallopeptidase domain 15	0.132416	0.00242652	1.65016	0.103544	0.999464	-4.323
fS.iCSd6Saquyu75HE	PTPRR	protein tyrosine phosphatase, receptor type R	-0.126724	0.0315922	-1.64994	0.103589	0.999464	-4.32328
cON9CdalehdFS6dOtc	ATP2A1	ATPase sarcoplasmic/endoplasmic reticulum Ca2+ transporting 1	0.219649	-0.0808993	1.6499	0.103598	0.999464	-4.32333
cFFd_eAkevVe_CfnKg	AMD1	adenosylmethionine decarboxylase 1	-0.0913096	-0.0060267	-1.64976	0.103627	0.999464	-4.32351
Q.DSReOH6Sh_VRSrek	COQ7	coenzyme Q7, hydroxylase	0.121442	0.0140719	1.64957	0.103666	0.999464	-4.32376
oEIdIkILR80UKo6VKU	QTRT2	queuine tRNA-ribosyltransferase accessory subunit 2	0.121517	-0.013313	1.64948	0.103683	0.999464	-4.32386
ia5MgDSucSdiKkiUS0	NADSYN1	NAD synthetase 1	0.0604132	-0.00760959	1.64944	0.103693	0.999464	-4.32393
opJV4Pp0G.uius.V4I	OTULIN	OTU deubiquitinase with linear linkage specificity	-0.0583907	0.00107156	-1.64867	0.103851	0.999464	-4.32491
fCn13KlFKeKHZUoToc	ABCF3	ATP binding cassette subfamily F member 3	-0.10135	0.0470632	-1.6468	0.104235	0.999464	-4.3273
EqLhnH31IhQqrZ.lIg	SLC22A1	solute carrier family 22 member 1	-0.15937	0.039006	-1.64664	0.104268	0.999464	-4.32751
c9PSir.9NS5RJ0qB1o	FAM210A	family with sequence similarity 210 member A	-0.0905488	-0.0309861	-1.64639	0.10432	0.999464	-4.32782
BeikiyquvoiS8sQIpI	R3HCC1L	R3H domain and coiled-coil containing 1 like	0.103911	0.012914	1.64593	0.104414	0.999464	-4.32841
B6qKIV_gC13fVJ1494	NUP210	nucleoporin 210	0.0663751	-0.0443966	1.64525	0.104555	0.999464	-4.32928
Q_i60UqoSolVRQ7NDo	ARL4C	ADP ribosylation factor like GTPase 4C	0.166561	0.00821422	1.64486	0.104636	0.999464	-4.32978
Q3dVN3rdAlLVJeF3RQ	HCN4	hyperpolarization activated cyclic nucleotide gated potassium channel 4	0.125402	0.0212205	1.64458	0.104693	0.999464	-4.33013
01BXNAw4H3SIpN6rXo	TMEM154	transmembrane protein 154	-0.10054	-0.0422517	-1.64419	0.104774	0.999464	-4.33063
ZVVCvevU.9d70QHF3o	HMGA1	high mobility group AT-hook 1	0.0605166	0.00114182	1.64401	0.104812	0.999464	-4.33087
BrwCBBHD4T5up.91f4	WRB	tryptophan rich basic protein	-0.0702026	-0.044003	-1.64386	0.104842	0.999464	-4.33105
r97irgSgOX7oBKC1C4	HDAC9	histone deacetylase 9	-0.115955	0.00207119	-1.64275	0.105073	0.999464	-4.33247
xF7FPVH53_MlF1yg6I	ARHGEF12	Rho guanine nucleotide exchange factor 12	-0.0852851	-0.0219141	-1.64249	0.105126	0.999464	-4.3328
ivtSU0U01N1IL.U31Q	OGFOD1	2-oxoglutarate and iron dependent oxygenase domain containing 1	0.0730819	0.0597607	1.64236	0.105154	0.999464	-4.33297
l1_CQCLARpUmugUlPU	FAF1	Fas associated factor 1	0.0477578	0.0207605	1.64205	0.105218	0.999464	-4.33336
rqSigEWV3snnYOgKnc	DIDO1	death inducer-obliterator 1	-0.111778	-0.0137752	-1.64196	0.105237	0.999464	-4.33348
0H6ylikog2fAVuK6K8	HSCB	HscB mitochondrial iron-sulfur cluster cochaperone	-0.0749963	0.0166445	-1.64161	0.105309	0.999464	-4.33392
HpZqJZGaYzoIoqQgqQ	CCM2	CCM2 scaffolding protein	0.0870295	0.0355506	1.64139	0.105356	0.999464	-4.33421
NohJKkvd3avQCEO6J0	GIT2	GIT ArfGAP 2	0.0797436	0.0243493	1.64123	0.105389	0.999464	-4.33441
rV5VQHpwhJ.S9eHVQc	MRPL49	mitochondrial ribosomal protein L49	0.0692611	0.0127286	1.6411	0.105416	0.999464	-4.33458
usUhcLhCIeguvqeirk	DGKA	diacylglycerol kinase alpha	0.0910736	-0.0302648	1.64106	0.105425	0.999464	-4.33463
ulQHtA7Re87PbVz18E	FAR2	fatty acyl-CoA reductase 2	-0.0819948	0.055205	-1.64087	0.105464	0.999464	-4.33487
ua7eec91ifZDllwoYQ	RPS25	ribosomal protein S25	0.0510683	0.0117996	1.64076	0.105487	0.999464	-4.33501
Nh0SQd1PMn9Ea.o7kk	NKRF	NFKB repressing factor	0.0616065	0.00295272	1.64059	0.105523	0.999464	-4.33523
9ToqQInSQKkJQgnggk	CARS	cysteinyl-tRNA synthetase	-0.0987783	-0.0197444	-1.64024	0.105596	0.999464	-4.33568
9To7ni3i_XOofoOqro	AQP7P1	aquaporin 7 pseudogene 1	0.231359	0.0262287	1.64014	0.105616	0.999464	-4.3358
3qwoqLpfiEfs9QHdeg	DSTYK	dual serine/threonine and tyrosine protein kinase	0.152205	-0.0195263	1.63956	0.105737	0.999464	-4.33654
xd1nAuhPVTAD7Unl6c	NLGN4X	neuroligin 4, X-linked	-0.14114	-0.0321253	-1.63952	0.105745	0.999464	-4.33659
TVvz5R54gp7X1wfuKI	ZNF549	zinc finger protein 549	0.115076	-0.0300091	1.63912	0.105828	0.999464	-4.33709
QCWSYU.SMW1ElKFniA	CHST10	carbohydrate sulfotransferase 10	0.0985298	-0.000998292	1.63901	0.105852	0.999464	-4.33724
HRIJUou7obeJUn95uU	CAPN15	calpain 15	-0.109204	-0.047576	-1.6387	0.105917	0.999464	-4.33764
BqUICQfiX6nDeniy0s	ELF1	E74 like ETS transcription factor 1	-0.0690521	0.0266963	-1.6381	0.106043	0.999464	-4.3384
ohIepX1CtCU7t44T14	STK40	serine/threonine kinase 40	-0.0583686	-0.0282742	-1.63668	0.10634	0.999464	-4.34021
KogIndzEf71aie2nro	MAT2B	methionine adenosyltransferase 2B	0.131766	0.045902	1.63629	0.106421	0.999464	-4.3407
iJ6LSpD1BQgHmkpauQ	MAFG-AS1	MAFG antisense RNA 1 (head to head)	-0.111924	0.0212602	-1.63621	0.106439	0.999464	-4.34081
We2op7nrrbsitfdf0Q	ITSN1	intersectin 1	-0.143529	0.0561897	-1.63582	0.10652	0.999464	-4.3413
c4rSi_iOJehBOkAVRc	FCF1	FCF1, rRNA-processing protein	-0.109499	-0.0143683	-1.63484	0.106726	0.999464	-4.34254
ZuoTiQOkg8qmLn9DnY	PRTFDC1	phosphoribosyl transferase domain containing 1	0.104868	0.032917	1.63472	0.106751	0.999464	-4.3427
3aKUBUIK3pAtKdKiHc	IGFBP3	insulin like growth factor binding protein 3	0.151145	0.0998979	1.63402	0.106898	0.999464	-4.34358
fmfudo6fZP1UMVTwFs	ANKRD36	ankyrin repeat domain 36	0.0994499	0.0195458	1.63374	0.106957	0.999464	-4.34394
Kqe8HpKAj9JN4OLVJE	OGFRL1	opioid growth factor receptor like 1	-0.149694	0.027514	-1.63367	0.106972	0.999464	-4.34403
ug5nc7oi6VFOXRFMo4	PEX2	peroxisomal biogenesis factor 2	0.0565503	-0.0222886	1.63357	0.106994	0.999464	-4.34416
lVJ4FYpwII4pCIA7FU	IFI27L2	interferon alpha inducible protein 27 like 2	0.0598871	-0.0255048	1.63349	0.107011	0.999464	-4.34426
fUQLhQgbiQlSkSWGWY	RPL36	ribosomal protein L36	0.043867	0.0002339	1.63347	0.107014	0.999464	-4.34428
KK8JCJAuU_.l.D6quo	LAPTM4A	lysosomal protein transmembrane 4 alpha	0.0854555	-0.00377129	1.63255	0.107208	0.999464	-4.34545
cX_eH1318VJIHRXqto	FAM110A	family with sequence similarity 110 member A	-0.0709939	0.00410571	-1.63228	0.107264	0.999464	-4.34579
NB56UHfE1UkDTalPo8	CCND2	cyclin D2	0.0463148	-0.00164461	1.63127	0.107478	0.999464	-4.34707
l6E.qgKnX6nnrgfe6U	PYCR1	pyrroline-5-carboxylate reductase 1	0.090176	0.0217053	1.63108	0.107518	0.999464	-4.34731
WbfQoVL541QQCtQAqU	NAMPT	nicotinamide phosphoribosyltransferase	-0.0966603	-0.0196235	-1.63085	0.107567	0.999464	-4.34761
Hqt4UpCe43gKJCgSQo	RAB20	RAB20, member RAS oncogene family	0.147369	-0.0462637	1.6292	0.107916	0.999464	-4.34969
EUn0lKhANV1QFHdRJ8	CREG1	cellular repressor of E1A stimulated genes 1	0.0688761	-0.00180745	1.62897	0.107965	0.999464	-4.34998
NRyo6oGDlA0h1FyJFI	TWSG1	twisted gastrulation BMP signaling modulator 1	0.0893943	0.00966882	1.62896	0.107967	0.999464	-4.35
o9VPeUT3hTiGafkuqs	IP6K3	inositol hexakisphosphate kinase 3	0.131578	-0.00344633	1.62894	0.107971	0.999464	-4.35002
xV81EqjEujNwBSFVLo	TBC1D9B	TBC1 domain family member 9B	-0.0681712	0.0285036	-1.62832	0.108104	0.999464	-4.35081
TlH5LhFLiJP_gigUQg	URI1	URI1, prefoldin like chaperone	-0.0719714	0.0350089	-1.6283	0.108107	0.999464	-4.35083
6tA.FelCNZCllageeE	RPS9	ribosomal protein S9	0.0533488	0.0150463	1.62792	0.108188	0.999464	-4.35131
H1CV9Xe_gPq7lenVCo	ADORA1	adenosine A1 receptor	-0.133335	0.0423984	-1.6279	0.108194	0.999464	-4.35135
Noh415TR55AkgRiHQo	RAB3C	RAB3C, member RAS oncogene family	0.163308	0.0642625	1.62648	0.108495	0.999464	-4.35314
Bd6tDaCmc5Sh44j6bo	GARS	glycyl-tRNA synthetase	-0.0514167	0.00760942	-1.62633	0.108526	0.999464	-4.35332
NpISuiV51T5ROQ94gA	SHISA3	shisa family member 3	-0.15933	-0.0455756	-1.6261	0.108577	0.999464	-4.35362
W1J56DXFNUopKRJSog	LGALS9	galectin 9	0.0843254	-0.0346354	1.62606	0.108586	0.999464	-4.35367
0lQpzJV19DPhcGqiAI	TCP1	t-complex 1	0.123296	0.057448	1.62591	0.108616	0.999464	-4.35386
lkkLCXcnzL9NXFXTl4	SEL1L3	SEL1L family member 3	0.0846434	-0.0902121	1.62577	0.108646	0.999464	-4.35403
NESQvLL4l4U4t94d70	MAP4K5	mitogen-activated protein kinase kinase kinase kinase 5	-0.061895	0.0416908	-1.6257	0.108661	0.999464	-4.35412
6oVC17v028cU7vW4qI	ALKBH8	alkB homolog 8, tRNA methyltransferase	-0.140258	0.0382764	-1.62528	0.108752	0.999464	-4.35466
TX1R1PCKcrimfcr56o	ATP6V1F	ATPase H+ transporting V1 subunit F	0.0561041	-0.00765688	1.62513	0.108783	0.999464	-4.35484
KSN0K_Muu9HKIboPiE	SAP30	Sin3A associated protein 30	-0.0796863	-0.0133648	-1.62393	0.109039	0.999464	-4.35635
rqeVdVeRLL_17r8.7M	GRM2	glutamate metabotropic receptor 2	-0.138291	0.0861389	-1.62332	0.10917	0.999464	-4.35713
rJdVC9Q6P5fdAOxBwk	C1GALT1C1	C1GALT1 specific chaperone 1	0.0762595	-0.0107143	1.62314	0.109208	0.999464	-4.35735
3ec8iVNeiVRd4FF1xQ	SPAG7	sperm associated antigen 7	0.0655913	0.00669385	1.62309	0.10922	0.999464	-4.35742
Zonn0tTdUik.rezf50	COQ5	coenzyme Q5, methyltransferase	-0.0508287	-0.00729271	-1.622	0.109454	0.999464	-4.3588
rJqqQJJV9JJX9RB.JM	FOXI3	forkhead box I3	-0.118278	0.00961528	-1.62128	0.109607	0.999464	-4.3597
lUg7Su6L6mhCLeeOKE	ZNF197	zinc finger protein 197	-0.0740261	0.024407	-1.62074	0.109724	0.999464	-4.36039
HIXrpEnSp50S4KQxR4	CCT2	chaperonin containing TCP1 subunit 2	0.0594473	0.0460552	1.62039	0.109798	0.999464	-4.36082
ZRJyUjIIR..dQDjl_o	ADI1	acireductone dioxygenase 1	0.118219	0.0189968	1.61991	0.109902	0.999464	-4.36143
rlnUn_Rv2NUClf.Klg	HIST2H4A	histone cluster 2 H4 family member a	-0.0869644	0.0964394	-1.61955	0.109979	0.999464	-4.36188
6wJ6DSQSVzqAUhAk_E	HDGFL3	HDGF like 3	-0.0854114	0.0364623	-1.61932	0.110029	0.999464	-4.36217
foFPOjsuTfIlMiSuHo	PIGH	phosphatidylinositol glycan anchor biosynthesis class H	-0.0648957	-0.00533657	-1.61929	0.110036	0.999464	-4.36221
BkLihuln_iLSX88o9E	FGD6	FYVE, RhoGEF and PH domain containing 6	-0.122573	-0.0150164	-1.61907	0.110083	0.999464	-4.36249
3tC_VJ_i_3tGRO7Xus	PITHD1	PITH domain containing 1	0.0479865	0.0143968	1.61894	0.110112	0.999464	-4.36266
T0PiSyf41freqtgoI4	AEN	apoptosis enhancing nuclease	-0.0832914	0.0147793	-1.61878	0.110146	0.999464	-4.36286
K_ocSlRlFuXp6E7A.g	TMEM128	transmembrane protein 128	0.148321	-0.0216999	1.61874	0.110155	0.999464	-4.36291
fVHB4ktLL61.r5M45g	SNORD21	small nucleolar RNA, C/D box 21	-0.10718	0.0124628	-1.61752	0.110417	0.999464	-4.36444
33a4wBEV3euJUm1XX4	CACNG1	calcium voltage-gated channel auxiliary subunit gamma 1	-0.135546	0.0167842	-1.6175	0.110423	0.999464	-4.36447
B0iRUYDid0C9ApOUgw	RBM43	RNA binding motif protein 43	0.0957971	-0.00562563	1.61708	0.110513	0.999464	-4.36499
QlIBCV7r_CuJ7ijqHA	EHBP1	EH domain binding protein 1	-0.060019	-0.0131077	-1.61689	0.110555	0.999464	-4.36523
B1LqutLKIkb0ioIlN0	ATP6V0E1	ATPase H+ transporting V0 subunit e1	-0.0735977	0.00291251	-1.61636	0.110669	0.999464	-4.3659
0e5.F1_V_7dK7rV5ec	COLGALT1	collagen beta(1-O)galactosyltransferase 1	0.076008	0.00770434	1.61619	0.110706	0.999464	-4.36611
91x56u6iufjgOI3kD4	SFXN4	sideroflexin 4	0.148258	-0.0460148	1.61605	0.110736	0.999464	-4.36629
rKSYUZKIG6XooIHo68	UQCC3	ubiquinol-cytochrome c reductase complex assembly factor 3	0.0936828	0.0496091	1.61572	0.110807	0.999464	-4.3667
Eg5j0Rf7ktaN0fppCo	CAT	catalase	0.0835381	0.00927506	1.61569	0.110815	0.999464	-4.36675
idG61Svei9_169yedE	NUP133	nucleoporin 133	0.0600514	0.0496145	1.61529	0.110902	0.999464	-4.36725
ZTFRXx9el33qceUe7k	RRAS	RAS related	0.0744605	-0.0287113	1.61513	0.110936	0.999464	-4.36745
33DqopptUt7vkkk900	SCCPDH	saccharopine dehydrogenase (putative)	0.0785944	0.0325921	1.61464	0.111041	0.999464	-4.36806
ooyO15fqtHAquF_9fk	MAP3K9	mitogen-activated protein kinase kinase kinase 9	0.142602	-0.0361506	1.61432	0.111111	0.999464	-4.36846
rlSJu0KiElE0ZSAxOE	GLT8D1	glycosyltransferase 8 domain containing 1	0.163457	-0.0528702	1.61429	0.111118	0.999464	-4.3685
Q5CeB9.Od9uUwdpP4U	SESN3	sestrin 3	-0.142238	-0.0243702	-1.61345	0.111299	0.999464	-4.36955
iLiYujnucbuA3t.mqU	HOXB5	homeobox B5	0.132894	-0.0258218	1.61344	0.111303	0.999464	-4.36957
Bn5UKURJALRQdAXH3w	NDUFS1	NADH:ubiquinone oxidoreductase core subunit S1	0.131289	-0.00250011	1.61343	0.111306	0.999464	-4.36958
xjYvpYo6OPukkglvkk	HAUS7	HAUS augmin like complex subunit 7	0.0624506	0.0480315	1.61336	0.111319	0.999464	-4.36966
Wh36lF3vHx7HOgnXrg	PROSER1	proline and serine rich 1	-0.0580458	-0.024056	-1.61208	0.111598	0.999464	-4.37127
c3ezqQKce017763qlE	RPAP2	RNA polymerase II associated protein 2	0.066259	0.0131205	1.61135	0.111757	0.999464	-4.37218
rJFCEq0ju8ep6LuukQ	RPP38	ribonuclease P/MRP subunit p38	-0.148834	-0.0233451	-1.6108	0.111878	0.999464	-4.37288
fW1rQwDWXh15lVk5gA	NPW	neuropeptide W	-0.124351	0.0724288	-1.6106	0.11192	0.999464	-4.37312
0cKL9ey17Di_ldLTVY	HIST2H2BF	histone cluster 2 H2B family member f	0.125643	-0.0118128	1.61057	0.111927	0.999464	-4.37316
cuUXXtx0__TiV7eUlQ	GRINA	glutamate ionotropic receptor NMDA type subunit associated protein 1	0.0822984	-0.0224172	1.6104	0.111965	0.999464	-4.37338
WrtO_jZ.uHvTe1_Euk	QDPR	quinoid dihydropteridine reductase	0.0676947	0.0143141	1.61029	0.111988	0.999464	-4.37351
HXeXV.lSl.dIez1Neo	SPRYD4	SPRY domain containing 4	0.0935884	0.0253597	1.61002	0.112049	0.999464	-4.37386
Zdd0ngRXX9HVA5AS3c	DMD	dystrophin	-0.144739	-0.0597454	-1.60969	0.11212	0.999464	-4.37426
xkuNKteQkuqCqlCs_g	ICAM1	intercellular adhesion molecule 1	-0.13964	0.0114424	-1.60909	0.112251	0.999464	-4.37502
cJSqpSF_9O7q3t9fOU	ZNF641	zinc finger protein 641	-0.123729	-0.00230655	-1.60888	0.112299	0.999464	-4.37529
od4ToRJShCedIXH1_o	WASH3P	WAS protein family homolog 3 pseudogene	0.086446	0.0175745	1.60865	0.112349	0.999464	-4.37557
3wsLStXCVbVCC4RC6U	SFT2D3	SFT2 domain containing 3	0.0939779	-0.0194635	1.60864	0.112349	0.999464	-4.37558
9OkiuiiEeCYeSJSCos	DYNLRB1	dynein light chain roadblock-type 1	0.0745662	-0.0117884	1.6086	0.112359	0.999464	-4.37563
6lZNddzXv2KyIn6R94	ATP6V0A2	ATPase H+ transporting V0 subunit a2	-0.0688113	0.0462535	-1.60819	0.11245	0.999464	-4.37615
iohT6U1KA.bEngMyko	UAP1	UDP-N-acetylglucosamine pyrophosphorylase 1	-0.0659259	0.00249296	-1.60798	0.112496	0.999464	-4.37641
ZoEIAdygVXgVQiKihU	BOLA1	bolA family member 1	-0.0755475	0.0173093	-1.60768	0.11256	0.999464	-4.37678
ieueeSjOmp9kX.tBeQ	FBXL15	F-box and leucine rich repeat protein 15	0.0830993	-0.0429291	1.60681	0.112752	0.999464	-4.37787
T4jcV7etqH1NXkjp44	PRL	prolactin	-0.22992	-0.0764823	-1.6067	0.112776	0.999464	-4.37801
Ndeq.VPpu34nneuMFs	NEDD9	neural precursor cell expressed, developmentally down-regulated 9	-0.134023	-0.0367594	-1.60667	0.112782	0.999464	-4.37804
rVQkOyK78CpXeeni6Q	ELOVL6	ELOVL fatty acid elongase 6	-0.100421	0.00488335	-1.60661	0.112796	0.999464	-4.37813
rSCIghchekVJEhEl5c	FAHD2CP	fumarylacetoacetate hydrolase domain containing 2C, pseudogene	0.127733	-0.0339854	1.60623	0.11288	0.999464	-4.3786
EqVlAHqXPs3qm8SuB4	GRIA3	glutamate ionotropic receptor AMPA type subunit 3	-0.137865	-0.0364659	-1.60615	0.112897	0.999464	-4.3787
fEe0fhQx4V38XZUZoQ	RAC1	Rac family small GTPase 1	-0.0544771	0.0151914	-1.60608	0.112912	0.999464	-4.37878
lVUBVf_uIE1X4S_SXc	NUMB	NUMB, endocytic adaptor protein	-0.0544544	-0.00209104	-1.606	0.112929	0.999464	-4.37888
TCl_h31eKvl4D19Of0	SH2B3	SH2B adaptor protein 3	-0.0741025	-0.0536931	-1.60524	0.113097	0.999464	-4.37983
QjEJcolUlV.34UzRC4	RCBTB1	RCC1 and BTB domain containing protein 1	0.0963217	-0.00587614	1.60479	0.113196	0.999464	-4.3804
rVUQ7jrP6KV7d66.8o	ZNF564	zinc finger protein 564	0.0844125	0.0395541	1.60473	0.113211	0.999464	-4.38048
lh6COSF_vXvLoBHsK0	PRMT2	protein arginine methyltransferase 2	-0.121713	-0.0219778	-1.60451	0.113258	0.999464	-4.38074
66ciB0Sd6gAiiSEq9U	SLC43A3	solute carrier family 43 member 3	-0.0766392	0.0305124	-1.60419	0.113329	0.999464	-4.38115
WiU576kCQd.9BR500s	WDR37	WD repeat domain 37	0.0672891	0.00374814	1.60416	0.113337	0.999464	-4.38119
6VfL3ErxZULXahbn3I	VIRMA	vir like m6A methyltransferase associated	0.0739413	0.028169	1.60404	0.113363	0.999464	-4.38134
iTugUQkl9JUIgt3vB0	ZNF250	zinc finger protein 250	-0.0961859	0.00688402	-1.60338	0.113508	0.999464	-4.38216
lg247UMSKSLWrUnQEo	SRP19	signal recognition particle 19	-0.0636163	0.00842323	-1.60333	0.113519	0.999464	-4.38222
ZmpehHzqhJMX6HhxSc	HNF1B	HNF1 homeobox B	-0.0867347	0.0134731	-1.60296	0.1136	0.999464	-4.38268
icmjQs6EeHSHiiSdR4	OGG1	8-oxoguanine DNA glycosylase	0.0964041	0.0369532	1.6007	0.114102	0.999464	-4.3855
lRfyRoy.XrVC6u6JfU	ACAT2	acetyl-CoA acetyltransferase 2	0.0619087	-0.0129645	1.60069	0.114103	0.999464	-4.38551
HVaFPTXgLLF0n1I0fo	POC5	POC5 centriolar protein	-0.0555596	0.0192434	-1.60051	0.114144	0.999464	-4.38574
3.d4LruoLFKoekglSk	DHTKD1	dehydrogenase E1 and transketolase domain containing 1	-0.0631503	-0.0445272	-1.60042	0.114163	0.999464	-4.38585
fkuElWlCUXcNd7JDBo	SLC6A9	solute carrier family 6 member 9	0.106169	-0.0251524	1.60004	0.114247	0.999464	-4.38632
To1KZJIELV4.7RfX8U	MSH3	mutS homolog 3	0.072696	0.0101924	1.59987	0.114286	0.999464	-4.38654
BL4hFy7OnTlSX1F6j0	MED17	mediator complex subunit 17	-0.143815	0.00901885	-1.59939	0.114392	0.999464	-4.38713
u7WvHH6UUZJfp1xJUA	RIPK1	receptor interacting serine/threonine kinase 1	0.0881727	-0.00653745	1.59911	0.114454	0.999464	-4.38748
fgx9354iWOVtVqUkqM	SELENOM	selenoprotein M	-0.114192	-0.00966565	-1.59895	0.11449	0.999464	-4.38768
l9c44oX.RIXseJ1uKM	SNORD25	small nucleolar RNA, C/D box 25	0.102619	0.00553869	1.59887	0.114507	0.999464	-4.38778
9COUpVUrvdKkvfrt58	BRMS1	breast cancer metastasis suppressor 1	0.0596282	-0.00477113	1.59858	0.114572	0.999464	-4.38814
fJ54BO0IlgoPSPlgIU	NDUFAF4	NADH:ubiquinone oxidoreductase complex assembly factor 4	-0.0925093	-0.0283421	-1.59854	0.114582	0.999464	-4.3882
QxeSeVSihiijvSOiQs	GPR108	G protein-coupled receptor 108	-0.0964855	0.0231326	-1.59735	0.114847	0.999464	-4.38968
NiOtCuv9T7kD30XtLo	PDE5A	phosphodiesterase 5A	0.164585	-0.0198938	1.59731	0.114855	0.999464	-4.38972
uRe0DtEjeoqh8IfNOU	GOLGA2P10	golgin A2 pseudogene 10	-0.0870123	-0.00346175	-1.59724	0.114872	0.999464	-4.38981
NGgYGkd8Ur8WklDVLU	NET1	neuroepithelial cell transforming 1	0.10954	0.000305208	1.59678	0.114974	0.999464	-4.39038
Z3uhLknqp.Ojf6u7Ko	KCNK4	potassium two pore domain channel subfamily K member 4	-0.144877	-0.0272633	-1.59582	0.115189	0.999464	-4.39157
Tv66R568VepXg6JwDQ	ZNFX1	zinc finger NFX1-type containing 1	0.0558356	-0.00417066	1.5958	0.115193	0.999464	-4.3916
ER1CPOl2pC5764iHeg	HEXB	hexosaminidase subunit beta	0.0449453	0.0171212	1.59548	0.115265	0.999464	-4.392
NE_8qgdKcu0m36.qiA	FAM102A	family with sequence similarity 102 member A	-0.0862225	-0.0477474	-1.59545	0.115272	0.999464	-4.39204
Tp3nvutucBZ13CjuXc	GBA	glucosylceramidase beta	0.0685358	0.0175808	1.59497	0.115378	0.999464	-4.39262
TU4d1Lv.3voURW0S9E	CDC42EP3	CDC42 effector protein 3	0.101344	0.031424	1.59492	0.115389	0.999464	-4.39269
9Xu4nvCuUD6e0.s9OE	KLF3	Kruppel like factor 3	0.150281	-0.0479415	1.59479	0.115419	0.999464	-4.39286
9NVUCF94_C07EvS6XA	SLC25A43	solute carrier family 25 member 43	-0.0645516	-0.00828133	-1.59465	0.11545	0.999464	-4.39302
3alFMtEekeAICb5Xrg	AKAP17A	A-kinase anchoring protein 17A	-0.0718139	-0.0113044	-1.59349	0.11571	0.999464	-4.39446
Ed2iSvih7ueHugoLpc	TGM5	transglutaminase 5	-0.113689	0.0790302	-1.59343	0.115724	0.999464	-4.39454
WeB6vK5Z755274NyBY	UQCRH	ubiquinol-cytochrome c reductase hinge protein	0.0376648	-0.0228088	1.59289	0.115844	0.999464	-4.39521
0rUwFYu5f5.UV_chHo	SEMA6A	semaphorin 6A	-0.154439	-0.0932812	-1.5926	0.11591	0.999464	-4.39557
TN6X5VSSxLX1wwao50	PRKY	protein kinase, Y-linked, pseudogene	-0.125319	0.0316072	-1.59198	0.116049	0.999464	-4.39634
ZrCHlEtVSopEe7.Hj4	SLFN5	schlafen family member 5	-0.111076	0.000706041	-1.59131	0.1162	0.999464	-4.39717
Nogju3mnfSq1ySjglM	THOC5	THO complex 5	0.0622751	0.00481118	1.5902	0.116449	0.999464	-4.39854
3U4t_f_nTEoiKgp5Sk	TXNL4B	thioredoxin like 4B	-0.118108	0.0173381	-1.5902	0.116451	0.999464	-4.39855
9HRvEhV3FX0l5XEmH0	MRPL4	mitochondrial ribosomal protein L4	0.0830423	0.0279877	1.58998	0.1165	0.999464	-4.39882
WAC.p_Xuw5UdX1V6dU	WDR77	WD repeat domain 77	0.0918456	-0.0115116	1.58992	0.116514	0.999464	-4.39889
6Up7AJAF2zSd6BDF5I	KDM3A	lysine demethylase 3A	-0.10845	-0.0406117	-1.58987	0.116525	0.999464	-4.39895
cpXr4AsdN163hNQItE	MAPKAP1	mitogen-activated protein kinase associated protein 1	0.0764274	0.0118818	1.58984	0.116531	0.999464	-4.39899
HiibxNeM19Snnwg6Hk	CDC14A	cell division cycle 14A	0.112957	0.00784374	1.58956	0.116596	0.999464	-4.39934
ud6PeXcK1RJ170p9XA	NGDN	neuroguidin	-0.127921	0.0234323	-1.58953	0.116602	0.999464	-4.39938
3tAR_4f_fw9Tg715dc	ACSL4	acyl-CoA synthetase long chain family member 4	-0.0753789	-0.0565073	-1.58926	0.116663	0.999464	-4.39971
KVeVX_o.H1FNA30HvI	RBM27	RNA binding motif protein 27	-0.0590049	0.0100527	-1.5889	0.116745	0.999464	-4.40016
91f4XHpTfXRJXSM0Go	CYB5D2	cytochrome b5 domain containing 2	0.0671599	0.0125615	1.58885	0.116755	0.999464	-4.40022
uqLEuU8oUkLhEoPeDU	PARP2	poly(ADP-ribose) polymerase 2	-0.0693581	0.0093525	-1.58842	0.116852	0.999464	-4.40074
KXir5UsuIiaJ_nkj0s	SLC7A5P2	solute carrier family 7 member 5 pseudogene 2	-0.131994	-0.0206751	-1.58798	0.116953	0.999464	-4.4013
uXaSCn_gxnCFNVAVAU	JHY	junctional cadherin complex regulator	0.141431	0.0537119	1.58795	0.11696	0.999464	-4.40134
37oASMOi_qSglzpU10	PROCR	protein C receptor	-0.113951	-0.0182684	-1.58753	0.117055	0.999464	-4.40185
urjl2bEo3rxe5L7gxU	MTCH1	mitochondrial carrier 1	-0.0495286	-0.0052282	-1.58745	0.117072	0.999464	-4.40195
H66G8L2iqWW31UFKJI	TYMP	thymidine phosphorylase	0.143763	0.029439	1.58649	0.117289	0.999464	-4.40313
6SUT9IXniHni4oOkuI	C21orf33	chromosome 21 open reading frame 33	0.0547369	-0.0186622	1.58571	0.117466	0.999464	-4.4041
EuDnMgPkqi1AqeZ91Y	SNORA14B	small nucleolar RNA, H/ACA box 14B	0.119393	0.0640558	1.58538	0.117542	0.999464	-4.40451
r3RTXs99BS41VF2tHU	FHIT	fragile histidine triad	0.099364	0.00153583	1.58472	0.117693	0.999464	-4.40533
Ekn8z0M47l7AUKL.VY	RAD21	RAD21 cohesin complex component	-0.0793658	0.00119323	-1.5845	0.117741	0.999464	-4.40559
T3p2gk3kQf4pR0eRVE	ABHD16A	abhydrolase domain containing 16A	0.0694175	-0.000226803	1.58433	0.11778	0.999464	-4.4058
Hic6UQblzRELUl0bSc	PAX8-AS1	PAX8 antisense RNA 1	0.152336	-0.0779288	1.58393	0.117872	0.999464	-4.4063
QDxzvalteTded2uVlo	CYBA	cytochrome b-245 alpha chain	0.045502	-0.0478837	1.58344	0.117984	0.999464	-4.40691
rTUh4oIVoB8qlG4lGk	RPL27A	ribosomal protein L27a	0.0505025	0.00712807	1.58298	0.118088	0.999464	-4.40747
WO_UG596pV7R5Z6OWY	PRKX	protein kinase, X-linked	0.0811279	0.0347787	1.58292	0.118102	0.999464	-4.40755
KFCEmnVxzUuB3K_LFE	HARBI1	harbinger transposase derived 1	-0.111843	-0.0294968	-1.58269	0.118154	0.999464	-4.40783
W6TMoe6re7uy4i7slE	NDFIP2	Nedd4 family interacting protein 2	-0.0551438	-0.0369602	-1.58249	0.1182	0.999464	-4.40807
oOpysAqp5.3vCTYysI	GTPBP8	GTP binding protein 8 (putative)	-0.0887811	-0.00210497	-1.5818	0.118357	0.999464	-4.40892
rlU_JFNUR6eeN_.vio	ZFAND2A	zinc finger AN1-type containing 2A	-0.0691645	-0.0180312	-1.58159	0.118406	0.999464	-4.40919
6apqguBVhrSZ.tN6.Q	NSUN5P1	NOP2/Sun RNA methyltransferase family member 5 pseudogene 1	-0.127904	-0.0244364	-1.58115	0.118506	0.999464	-4.40972
liCCuA37ni6u3d0ClI	ATP5H	ATP synthase, H+ transporting, mitochondrial Fo complex subunit D	-0.051517	-0.0102736	-1.58111	0.118514	0.999464	-4.40977
E0S1flzu6SLtUlI7uU	CD84	CD84 molecule	-0.081773	0.0367677	-1.58034	0.118691	0.999464	-4.41072
lsRoeDeRIkI54ui2qk	HLA-DRB6	major histocompatibility complex, class II, DR beta 6 (pseudogene)	0.0685578	-0.0267755	1.58024	0.118715	0.999464	-4.41085
ipeYnqAoSOKoXbl9_c	SLC8B1	solute carrier family 8 member B1	0.0662801	0.0442631	1.57978	0.11882	0.999464	-4.41142
NRcFEbkMC125eedElU	TNFRSF13B	TNF receptor superfamily member 13B	0.0624228	0.0188573	1.57968	0.118844	0.999464	-4.41154
fkVPSgF4EqCuBV7XhQ	DGUOK	deoxyguanosine kinase	0.136572	0.0191178	1.57966	0.118848	0.999464	-4.41156
fj7uAeVJ0qMFKhPRe4	FAM213A	family with sequence similarity 213 member A	-0.0759427	-0.0328998	-1.57935	0.11892	0.999464	-4.41195
T5N2a7u1H3VdH9V0VM	RAB6B	RAB6B, member RAS oncogene family	-0.145089	-0.0896688	-1.57932	0.118925	0.999464	-4.41198
Kkjn_VKfdFGuxajPAU	HADHA	hydroxyacyl-CoA dehydrogenase trifunctional multienzyme complex subunit alpha	0.0652448	0.00584017	1.57919	0.118956	0.999464	-4.41214
rq8wB_7ggj6X3UXde4	USP46	ubiquitin specific peptidase 46	0.0727089	-0.000254912	1.57896	0.119007	0.999464	-4.41242
9UF3V6JQXsALq_PnhI	PLLP	plasmolipin	0.096368	0.0501927	1.57891	0.11902	0.999464	-4.41249
KJLSlERT51QDofd5CU	APOBEC3F	apolipoprotein B mRNA editing enzyme catalytic subunit 3F	-0.0618449	-0.00449388	-1.57883	0.119039	0.999464	-4.41259
reEHuCUV6nEgFEt9Uk	ST3GAL5	ST3 beta-galactoside alpha-2,3-sialyltransferase 5	0.069761	-0.0657682	1.57845	0.119125	0.999464	-4.41305
3JikV8enxddOklx3X4	TP63	tumor protein p63	-0.122641	-0.0405133	-1.57839	0.119139	0.999464	-4.41312
QIigNLZ4s8.h1rdfrk	AGAP1	ArfGAP with GTPase domain, ankyrin repeat and PH domain 1	-0.205046	0.0212581	-1.57807	0.119212	0.999464	-4.41352
KJTdSrhoFS7PF56BQo	RNFT2	ring finger protein, transmembrane 2	-0.0704963	-0.0112299	-1.57785	0.119262	0.999464	-4.41379
f0LQV4ks6o4uOX0lAk	SERPINB10	serpin family B member 10	0.0908457	-0.00377117	1.57763	0.119315	0.999464	-4.41407
0OO0kefWtrpn3d6ViU	STK16	serine/threonine kinase 16	-0.0955584	-0.00197326	-1.5771	0.119437	0.999464	-4.41472
oeEuIRBveB7irtUoAI	FAM81A	family with sequence similarity 81 member A	0.0902979	-0.010988	1.57694	0.119472	0.999464	-4.41491
lm9UPOn3dI1Jfgvf4U	UBE2L3	ubiquitin conjugating enzyme E2 L3	0.0853267	-0.00437876	1.57692	0.119478	0.999464	-4.41494
9yihU7I9kjpejqKCpI	SPR	sepiapterin reductase	0.109986	0.0649433	1.57686	0.119491	0.999464	-4.41501
uQqdUqQFw9VUAbgtqg	BCL7A	BCL tumor suppressor 7A	0.09493	0.0313841	1.57668	0.119532	0.999464	-4.41523
u1dXxVTXwf7NenzBKU	ADIPOR1	adiponectin receptor 1	-0.0615811	-0.0224829	-1.57641	0.119594	0.999464	-4.41556
35p0LR0invk.SpzvrU	SAE1	SUMO1 activating enzyme subunit 1	0.0421188	0.0201901	1.57635	0.119608	0.999464	-4.41563
xxdKhSDW6gqOheu9W8	FAM118A	family with sequence similarity 118 member A	-0.112231	-0.0109761	-1.57633	0.119613	0.999464	-4.41566
opuUung.BGiFFUnGBI	SIRT5	sirtuin 5	0.0914182	0.0309753	1.57611	0.119663	0.999464	-4.41593
3nq_5PCpS.H7eXf4UU	ADAP2	ArfGAP with dual PH domains 2	-0.102923	-0.068977	-1.57596	0.119698	0.999464	-4.41611
ipPJ4SnrBLURCOsyl4	PIGV	phosphatidylinositol glycan anchor biosynthesis class V	-0.232226	-0.00574786	-1.57467	0.119997	0.999464	-4.4177
H34p74gHyhIJcXTVKU	NAGA	alpha-N-acetylgalactosaminidase	-0.123418	-0.023172	-1.57464	0.120003	0.999464	-4.41773
xOeen.eCErn4H7S.v8	WWP1	WW domain containing E3 ubiquitin protein ligase 1	0.0552207	0.0160242	1.57401	0.120149	0.999464	-4.41851
Ht3EJkrhd6N9fgKopI	RRP8	ribosomal RNA processing 8	-0.0556271	0.0274642	-1.57383	0.12019	0.999464	-4.41873
ZxRe5qp3tNGVe6NNHk	TMPRSS3	transmembrane protease, serine 3	0.136021	0.0137038	1.57373	0.120214	0.999464	-4.41886
WSauUpGu0kpBOliKWo	MIR564	microRNA 564	0.155298	-0.0338462	1.57362	0.12024	0.999464	-4.41899
cSXEN7hRRCO5XjpJ4I	TOMM6	translocase of outer mitochondrial membrane 6	0.0516915	0.0212132	1.57347	0.120273	0.999464	-4.41916
BeS17p6hEi0nji94xQ	CEP19	centrosomal protein 19	-0.108575	0.00643107	-1.5731	0.120359	0.999464	-4.41962
cdCVX1_d6FXysxXoIk	MPI	mannose phosphate isomerase	0.0811397	0.0190265	1.57252	0.120494	0.999464	-4.42034
9tcizknrAFIpxNSzx4	RAP1BL	RAP1B, member of RAS oncogene family pseudogene	-0.0758973	-0.0332674	-1.57238	0.120526	0.999464	-4.4205
BSEI6J50f_Wr_ulH0U	ZNF324	zinc finger protein 324	0.0806716	0.0113512	1.57171	0.120682	0.999464	-4.42133
uRrneh55uutPd3Rp7Q	CASP9	caspase 9	0.140127	0.0364143	1.57157	0.120713	0.999464	-4.42149
9V6Rerq.iehIJ8iECk	MTFP1	mitochondrial fission process 1	-0.0808717	0.0396589	-1.57155	0.12072	0.999464	-4.42153
9cucSQeISQUIpCAXqM	CD44	CD44 molecule (Indian blood group)	0.129954	0.0131682	1.57153	0.120724	0.999464	-4.42155
NZ7vErPxfnuj54ejrU	SLC41A2	solute carrier family 41 member 2	-0.0842405	-0.0401878	-1.57147	0.120738	0.999464	-4.42162
QeVmH2TSoWTnj_x53c	DNAL4	dynein axonemal light chain 4	-0.0639662	0.00121386	-1.57127	0.120784	0.999464	-4.42187
xoQoh1bJOFXujuUuEA	CAPRIN2	caprin family member 2	-0.102275	-0.0115887	-1.57095	0.120858	0.999464	-4.42226
lXuCTBVHH1IfldX6qE	CPT1A	carnitine palmitoyltransferase 1A	-0.109638	0.00914856	-1.57092	0.120865	0.999464	-4.42229
uSSLzos0g39ToBdTOk	MBNL3	muscleblind like splicing regulator 3	-0.125335	-0.0485153	-1.57086	0.120879	0.999464	-4.42237
ljhMe8iFHo8khXrkuE	CBWD5	COBW domain containing 5	-0.0741537	0.0236425	-1.57066	0.120926	0.999464	-4.42261
EpeB.5BBO4gZEeyIJU	ZNF555	zinc finger protein 555	0.145157	-0.0660902	1.57053	0.120956	0.999464	-4.42277
cRJ0uV9031e6q_DyS0	NXPH2	neurexophilin 2	0.105645	0.00163138	1.5705	0.120963	0.999464	-4.42281
TlIohSKfq.44DWkEkk	STX8	syntaxin 8	0.0512312	0.00452512	1.56938	0.121223	0.999464	-4.42418
ijU0QJgtOoiUR_Ougw	POMP	proteasome maturation protein	-0.0488312	0.0155555	-1.56895	0.121323	0.999464	-4.4247
ZfEgo719KKCSRwCR3g	RPS27	ribosomal protein S27	-0.0496009	-0.0169656	-1.56845	0.12144	0.999464	-4.42532
ioSSItD9X9vqLqS6ro	DTX1	deltex E3 ubiquitin ligase 1	0.115617	0.0055711	1.56836	0.121461	0.999464	-4.42543
0Ug6h7gerHfFOSEROU	CGRRF1	cell growth regulator with ring finger domain 1	-0.0562195	0.00734169	-1.56824	0.12149	0.999464	-4.42558
NmmkE6aG4wO0u4F6KU	MED27	mediator complex subunit 27	-0.0808245	0.00880182	-1.56809	0.121523	0.999464	-4.42575
0F3kV4KyUxI5YSNRAo	HEY2	hes related family bHLH transcription factor with YRPW motif 2	-0.182414	-0.00860851	-1.56809	0.121525	0.999464	-4.42576
ZtVAXJynC0I0E9Sr6w	PTPRF	protein tyrosine phosphatase, receptor type F	-0.161383	0.0205656	-1.56686	0.121812	0.999464	-4.42727
r3nVfHPekFSlWLUI3Y	MPND	MPN domain containing	0.10934	-0.0385739	1.56664	0.121863	0.999464	-4.42753
fX.X0i4NNSHXToytq4	ACO1	aconitase 1	0.0501636	0.0139406	1.5666	0.121872	0.999464	-4.42758
0qXgt_Sh0ejI7z2HX0	NBPF10	NBPF member 10	-0.13396	-0.0090845	-1.56655	0.121883	0.999464	-4.42764
xyHx56EN5OpNFXVZOw	CAMK2G	calcium/calmodulin dependent protein kinase II gamma	-0.101456	0.0110284	-1.56653	0.121889	0.999464	-4.42767
ZTQ9e47V6qw9B32LZA	CCDC15	coiled-coil domain containing 15	0.12294	0.01547	1.56628	0.121947	0.999464	-4.42797
rOi3ipphpxenWiDqz8	SNRNP70	small nuclear ribonucleoprotein U1 subunit 70	0.069898	0.0145503	1.56606	0.121998	0.999464	-4.42824
c6Oipeigiq3yKPR07U	HCG26	HLA complex group 26 (non-protein coding)	0.105547	-0.0233456	1.56599	0.122016	0.999464	-4.42833
it5Legn7edzIDgDkk4	PDP1	pyruvate dehyrogenase phosphatase catalytic subunit 1	-0.124179	0.000157773	-1.56578	0.122065	0.999464	-4.42859
coan3AiF50x_cXX1Lo	RPUSD2	RNA pseudouridylate synthase domain containing 2	0.0525381	0.0229189	1.56517	0.122207	0.999464	-4.42933
fIiifq_fV7VZVd7pPs	BCORL1	BCL6 corepressor like 1	0.137512	0.0670232	1.56453	0.122356	0.999464	-4.4301
9Cl719JCX1BJ69Uugo	ZP3	zona pellucida glycoprotein 3	0.117022	0.0203682	1.56413	0.122451	0.999464	-4.4306
fiSgOZ4dSJ6Va5I8K8	TFPT	TCF3 fusion partner	0.0671815	0.00442548	1.56321	0.122668	0.999464	-4.43172
NE01SK670u0hd8OpS4	DNAJA1	DnaJ heat shock protein family (Hsp40) member A1	-0.0466215	0.00630994	-1.5632	0.122669	0.999464	-4.43173
i1LnXep34vnn4PluyE	UBAC1	UBA domain containing 1	0.0530795	0.00691999	1.5631	0.122694	0.999464	-4.43186
f9umu8eFepuuHNsel8	ICAM3	intercellular adhesion molecule 3	0.0572323	0.0206931	1.5627	0.122787	0.999464	-4.43234
0AmKRHnx5fqvuiOhW4	NELFB	negative elongation factor complex member B	0.0536219	0.0282914	1.5626	0.122811	0.999464	-4.43246
QopS7BvE4dviAvig.U	WSB2	WD repeat and SOCS box containing 2	-0.0806418	-0.0109335	-1.56224	0.122897	0.999464	-4.43291
0IiH14JJlUUJ0Il01k	OAS1	2'-5'-oligoadenylate synthetase 1	0.0882131	-0.074273	1.56203	0.122944	0.999464	-4.43315
l6up6QiuLkl.hVB19w	UFSP1	UFM1 specific peptidase 1 (inactive)	0.137954	-0.0321063	1.56156	0.123057	0.999464	-4.43373
xqCi_0_44pH6Kr3quU	C12orf65	chromosome 12 open reading frame 65	-0.0712794	-0.0071491	-1.56121	0.123139	0.999464	-4.43416
fdMOLku0h7lx3jrO5Q	LRRC1	leucine rich repeat containing 1	-0.0817122	-0.0104213	-1.56092	0.123207	0.999464	-4.43451
uYHTdeXkpVCtRXt6UQ	YIF1B	Yip1 interacting factor homolog B, membrane trafficking protein	0.0868467	-0.00186126	1.56086	0.12322	0.999464	-4.43458
3OBSaluV9DlVC4lSB8	CCDC124	coiled-coil domain containing 124	0.0871559	0.0107449	1.56076	0.123244	0.999464	-4.4347
WlAitRBSu5HvR5JU.k	POLR2D	RNA polymerase II subunit D	0.0452656	0.0391503	1.56049	0.123308	0.999464	-4.43503
ltdTh6khoC50ReeiKM	ASMT	acetylserotonin O-methyltransferase	-0.206673	0.0461711	-1.56044	0.123321	0.999464	-4.4351
cl6TfxQULAegje8esg	MZT1	mitotic spindle organizing protein 1	-0.0750365	-0.01281	-1.56016	0.123387	0.999464	-4.43544
ZqrVKG5dMTh_J_0tR4	CTNS	cystinosin, lysosomal cystine transporter	-0.0707231	0.0282729	-1.55998	0.123428	0.999464	-4.43565
9pN1JHikXeHRLx86JE	RPS6KC1	ribosomal protein S6 kinase C1	0.0780906	0.0118929	1.5595	0.123543	0.999464	-4.43624
rtGiDc3DVHs8IqgFqU	MED18	mediator complex subunit 18	0.142535	0.0144593	1.55924	0.123603	0.999464	-4.43655
KjupQtR7XX6aQCVPgg	TAGLN	transgelin	-0.0959252	-0.0199615	-1.55919	0.123617	0.999464	-4.43662
Bt8KIesoopOgFAKW7s	MEIS1	Meis homeobox 1	0.115632	-0.0277537	1.55899	0.123662	0.999464	-4.43686
x3PpTep9En4vBfn.Wo	ALOX5AP	arachidonate 5-lipoxygenase activating protein	0.0645658	0.0123837	1.55884	0.123699	0.999464	-4.43704
EphT4tct1fv7lXsorI	SUPT4H1	SPT4 homolog, DSIF elongation factor subunit	0.0697297	0.0322699	1.55854	0.123769	0.999464	-4.4374
liJbNdStUde9PlXyt0	PAPOLG	poly(A) polymerase gamma	-0.136993	0.0224667	-1.55832	0.123821	0.999464	-4.43767
i5G1vP0uH61bq3JfVU	COL7A1	collagen type VII alpha 1 chain	-0.136673	0.00544187	-1.55814	0.123865	0.999464	-4.43789
KTlCCOIWqimGcL5424	WDR4	WD repeat domain 4	0.104409	0.0252434	1.55802	0.123893	0.999464	-4.43804
E6RDfp0eQXeXVq9CQ8	LGMN	legumain	0.157186	0.0320283	1.55756	0.124002	0.999464	-4.4386
KSM9_nSper4qJ8qChs	CDIPT	CDP-diacylglycerol--inositol 3-phosphatidyltransferase	0.0843307	0.021739	1.5574	0.124039	0.999464	-4.43879
6TtKgtn.rl6ev5UiUI	TK2	thymidine kinase 2, mitochondrial	0.129258	0.0572112	1.557	0.124135	0.999464	-4.43928
ZgEpErjk9157590ud0	GHITM	growth hormone inducible transmembrane protein	-0.0553946	-0.0325701	-1.55686	0.124167	0.999464	-4.43944
BEglUSegdAkDzrdsiU	BROX	BRO1 domain and CAAX motif containing	-0.12552	0.00698052	-1.5566	0.12423	0.999464	-4.43976
ZeK54aEbbEZie6Hrqg	PKN1	protein kinase N1	0.109064	0.0291581	1.55615	0.124336	0.999464	-4.44031
QeWTjJAnYYf.sELrpc	SPAG6	sperm associated antigen 6	0.112948	-0.0170848	1.55555	0.12448	0.999464	-4.44104
fHE9Fg9QglqK9JLXpU	ALG14	ALG14, UDP-N-acetylglucosaminyltransferase subunit	-0.0848407	0.0312344	-1.55546	0.124501	0.999464	-4.44115
QVfd9fRTeRxP3p41Q0	OSBP	oxysterol binding protein	-0.0526074	-0.000968625	-1.55477	0.124666	0.999464	-4.44199
QOOmuiuuvsu46NV.K8	APOL3	apolipoprotein L3	0.0773175	-0.0391873	1.55436	0.124763	0.999464	-4.44249
xa80kFts14EKcYyl84	SS18	SS18, nBAF chromatin remodeling complex subunit	-0.113999	-0.053366	-1.55419	0.124803	0.999464	-4.44269
uUT6W7634HXpdCQ1lw	SERPINB9	serpin family B member 9	-0.128777	0.0330038	-1.55401	0.124846	0.999464	-4.44291
HjjXHnVJBdxNSg4tXI	MAP4K1	mitogen-activated protein kinase kinase kinase kinase 1	0.0486762	-0.0138971	1.55357	0.124952	0.999464	-4.44345
TlR9ju_9_2R8qE0NCg	SETD9	SET domain containing 9	0.0748306	0.0290151	1.55331	0.125013	0.999464	-4.44375
EqOojHvutF3oAxPecc	IL1R2	interleukin 1 receptor type 2	-0.127584	0.0734604	-1.55309	0.125066	0.999464	-4.44403
BELB14lZupaRUUeVnk	RNF126P1	ring finger protein 126 pseudogene 1	0.147921	-0.0352268	1.55298	0.125092	0.999464	-4.44416
f7iK5v65JP3pOoEgek	FAM156A	family with sequence similarity 156 member A	-0.102162	0.0296446	-1.5527	0.125159	0.999464	-4.4445
iVu_fQHiEjqHwSkOq0	IRF4	interferon regulatory factor 4	-0.0640163	0.0121444	-1.55267	0.125166	0.999464	-4.44453
inm.CX1VNux5Ivieko	DDIT4	DNA damage inducible transcript 4	-0.0871962	-0.0148994	-1.55251	0.125204	0.999464	-4.44473
TwnfXlW9J9HVFf0m14	DCTN1	dynactin subunit 1	0.104159	0.0398879	1.5525	0.125207	0.999464	-4.44474
B10nshK1.2OsTP3_X8	CD69	CD69 molecule	-0.0831822	-0.0332622	-1.55111	0.125539	0.999464	-4.44642
Z016KIKJIUHKAgqInU	UBXN8	UBX domain protein 8	0.0997327	0.00683377	1.54984	0.125843	0.999464	-4.44795
0Cq3veS6IIT3rhSH.k	KDM5B	lysine demethylase 5B	-0.100081	0.00981612	-1.54953	0.125919	0.999464	-4.44834
f3r8rs7L6lO8ftSKCI	DIP2B	disco interacting protein 2 homolog B	-0.0480833	-0.0215781	-1.5494	0.125949	0.999464	-4.44849
iDpdN157X2JtWnsUOg	ACOT2	acyl-CoA thioesterase 2	0.0917643	-0.00291915	1.54927	0.12598	0.999464	-4.44864
xAB8SY6VRQpchGkel0	ST3GAL4	ST3 beta-galactoside alpha-2,3-sialyltransferase 4	0.127457	-0.0174589	1.549	0.126046	0.999464	-4.44898
lQuPtIfip0yC7ysad0	PRPF4B	pre-mRNA processing factor 4B	-0.106223	-0.0297218	-1.54815	0.12625	0.999464	-4.45
B3tUSUUXd10lJDhNJs	DZANK1	double zinc ribbon and ankyrin repeat domains 1	-0.0919458	0.00999462	-1.54804	0.126276	0.999464	-4.45013
oeWU9eSTRTCS5Ku3U0	AP3M2	adaptor related protein complex 3 mu 2 subunit	0.0564234	0.0280214	1.5479	0.126311	0.999464	-4.45031
3ne7SraquSAtKEg4qM	GPS1	G protein pathway suppressor 1	-0.108578	-0.0577397	-1.5478	0.126335	0.999464	-4.45043
cigO0Sqc45CAl0gOHk	TRNT1	tRNA nucleotidyl transferase 1	0.130168	-0.010143	1.54779	0.126337	0.999464	-4.45044
NtYFKp7Dpf3zHcgzEA	ISCA1P1	iron-sulfur cluster assembly 1 pseudogene 1	-0.0679877	-0.00331213	-1.54764	0.126373	0.999464	-4.45062
WlcVKodVL94fgsh4gg	MSL1	male specific lethal 1 homolog	-0.0927003	0.00875419	-1.5476	0.126383	0.999464	-4.45067
6dIvrulxenMTfTV1UU	DDRGK1	DDRGK domain containing 1	-0.0567072	-0.0314669	-1.54693	0.126543	0.999464	-4.45147
xl54HaKov6ID.ISSd4	UBE2H	ubiquitin conjugating enzyme E2 H	-0.100296	-0.00426098	-1.54595	0.126781	0.999464	-4.45266
Kl8KrKCABeHkDTtLss	PRPF39	pre-mRNA processing factor 39	0.122541	-0.0644207	1.54541	0.12691	0.999464	-4.45331
QqOEAk75n_TSQpPh94	EOGT	EGF domain specific O-linked N-acetylglucosamine transferase	-0.0780583	0.0435918	-1.54514	0.126975	0.999464	-4.45363
iZP5.H5DjzEKkh3d6o	MIR300	microRNA 300	-0.12109	0.0257793	-1.545	0.127008	0.999464	-4.4538
ur3yTKK31TnCC11TlA	MIR2116	microRNA 2116	-0.147242	-0.0106648	-1.54458	0.127111	0.999464	-4.45431
congjqSuggiVdDLgjg	GTF2A1	general transcription factor IIA subunit 1	-0.112993	-0.000462379	-1.54372	0.127319	0.999464	-4.45535
9eAUiN7DTdz6XquXuc	TMEM43	transmembrane protein 43	-0.0607509	-0.00849977	-1.54363	0.127341	0.999464	-4.45546
EpIo5LopTSqX4wRIv0	RBM4	RNA binding motif protein 4	0.069854	0.0450923	1.54362	0.127343	0.999464	-4.45547
3giUKCIB9JKYyQ5ElA	VPS37A	VPS37A, ESCRT-I subunit	0.0676243	-0.0503307	1.54359	0.127352	0.999464	-4.45551
N6h32CEUN7mc9GcBm0	HIST1H3C	histone cluster 1 H3 family member c	0.0944854	0.0757486	1.54352	0.127369	0.999464	-4.45559
ua6oIQoq.iTpIKARXg	ACYP1	acylphosphatase 1	0.08435	0.0249905	1.54336	0.127408	0.999464	-4.45579
xu3n8ix_RpCpNPRKhc	PDPK1	3-phosphoinositide dependent protein kinase 1	-0.0792307	-0.0216306	-1.54215	0.127701	0.999464	-4.45724
WSntNQgebC77nSzVCo	MTCP1	mature T-cell proliferation 1	-0.0519083	0.0555043	-1.5421	0.127713	0.999464	-4.45731
rUroYBTfXnot8T4uRQ	POLR3C	RNA polymerase III subunit C	0.0477316	0.00955772	1.54209	0.127715	0.999464	-4.45732
3W.fA7xS1SUN8a4TxI	SEPT3	septin 3	-0.108345	-0.0786897	-1.54197	0.127743	0.999464	-4.45746
6.PHwKxYKClK5Lp0ZU	TDRD1	tudor domain containing 1	-0.156963	0.000870476	-1.54182	0.127781	0.999464	-4.45764
ui4eB8ge_oO9SO3EVI	SPAG16	sperm associated antigen 16	-0.0615018	-0.0174393	-1.54178	0.127789	0.999464	-4.45768
3V0_El0Xi0X1C_9Tqc	EIF6	eukaryotic translation initiation factor 6	0.0492012	0.0500913	1.54174	0.1278	0.999464	-4.45774
WilWqieil2gill2egk	DUX4L5	double homeobox 4 like 5	-0.177964	0.0237268	-1.54165	0.127823	0.999464	-4.45785
Tq_AVU76Up63QHXhdI	LOC100288254	uncharacterized LOC100288254	0.173953	-0.0399116	1.54154	0.127849	0.999464	-4.45798
lks1Li4IEfh4d_pRd4	PROSER1	proline and serine rich 1	0.0578451	-0.0139558	1.54152	0.127854	0.999464	-4.45801
9Jf90CV.S8QUVRzoNI	ANAPC13	anaphase promoting complex subunit 13	0.0530285	0.0169242	1.54085	0.128017	0.999464	-4.45881
6ep6Huo3jxIa4TBEoI	EEF1AKMT1	EEF1A lysine methyltransferase 1	0.0650372	0.00337975	1.54034	0.128141	0.999464	-4.45943
EY5Aik4E4u4F45SZSU	KAT6B	lysine acetyltransferase 6B	-0.110231	-0.0527804	-1.53991	0.128246	0.999464	-4.45994
fXHKjeF0Lv94lSn164	XPO4	exportin 4	-0.0495277	-0.000770988	-1.53966	0.128305	0.999464	-4.46024
utF.p30iOSoRGOp968	VHL	von Hippel-Lindau tumor suppressor	-0.0892145	0.010099	-1.53936	0.128379	0.999464	-4.4606
Bqn4ye61XdV3hxcA0M	PFKFB3	6-phosphofructo-2-kinase/fructose-2,6-biphosphatase 3	-0.101218	-0.0663117	-1.53934	0.128383	0.999464	-4.46062
rkQGsv_7vp51Htd5SU	RPS27	ribosomal protein S27	0.0702833	-0.00111123	1.53925	0.128407	0.999464	-4.46074
rroK4jCnr9u7_6oqk4	KSR2	kinase suppressor of ras 2	-0.143798	0.0333433	-1.53903	0.128459	0.999464	-4.46099
EUlcJSV53lwux1IIB0	PHYKPL	5-phosphohydroxy-L-lysine phospho-lyase	0.0743867	-0.0165791	1.53864	0.128555	0.999464	-4.46146
TxUSCigugqEokTKyOU	MTR	5-methyltetrahydrofolate-homocysteine methyltransferase	-0.0746884	0.0219775	-1.53855	0.128576	0.999464	-4.46157
0BFePaXjoiCCkzvYek	RPL23AP42	ribosomal protein L23a pseudogene 42	0.0585396	0.0180384	1.5383	0.128638	0.999464	-4.46188
ljsJFJPX17NX.ulSXU	C11orf74	chromosome 11 open reading frame 74	0.0853119	-0.00329605	1.53826	0.128648	0.999464	-4.46193
ohS5Ax.iJF6txKEw_k	TMEM64	transmembrane protein 64	0.0623034	-0.0318902	1.53767	0.128791	0.999464	-4.46263
opErJ0vz_f3FeXpR_c	SPATA18	spermatogenesis associated 18	0.10365	0.0692389	1.53643	0.129096	0.999464	-4.46412
0ECqTqXUl.lRC5dLlQ	SH3BP1	SH3 domain binding protein 1	-0.071203	0.0027126	-1.53626	0.129136	0.999464	-4.46432
foXp7QXX75VR75fiD4	C1orf50	chromosome 1 open reading frame 50	0.0572778	0.00676729	1.53589	0.129227	0.999464	-4.46477
Tq9AOOgpYIkKfM66yo	MED1	mediator complex subunit 1	-0.0821894	-0.00576113	-1.53483	0.129488	0.999464	-4.46604
WhKIH.9TObkx3ew9S4	ATXN1	ataxin 1	-0.08066	-0.0489625	-1.5343	0.129619	0.999464	-4.46668
Bp4v0_fAOdd78iqXrI	ZNF174	zinc finger protein 174	-0.068181	-0.00385235	-1.53425	0.129629	0.999464	-4.46673
Byv_6TUa0rsignlX5I	DCAF7	DDB1 and CUL4 associated factor 7	-0.0445613	0.0148823	-1.53421	0.129641	0.999464	-4.46679
Wa913l8AEuVBLgeVdY	RHBDL3	rhomboid like 3	-0.108114	-0.0113167	-1.53393	0.129708	0.999464	-4.46711
6AA4.elqbrp0Jew1SQ	XPNPEP3	X-prolyl aminopeptidase 3	-0.122148	-0.042527	-1.53377	0.129749	0.999464	-4.46731
KQA6gFL05KSCS_uu3o	NSD3	nuclear receptor binding SET domain protein 3	-0.104567	-0.0240243	-1.53371	0.129763	0.999464	-4.46738
rK1F57uVt1157lVF10	KRTAP10-11	keratin associated protein 10-11	0.125413	0.0278827	1.53362	0.129785	0.999464	-4.46749
T.OKlGre72HSXSoYd4	BSG	basigin (Ok blood group)	0.0680134	-7.51572e-05	1.53357	0.129796	0.999464	-4.46755
oo7qL.wOcyV6n5VP6o	VASP	vasodilator stimulated phosphoprotein	0.109454	-0.0433506	1.53344	0.12983	0.999464	-4.46771
iFuuBX6qivclAnpEgg	NIT2	nitrilase family member 2	0.0589751	0.0090292	1.53329	0.129865	0.999464	-4.46788
0VJlKWSCBIIXSg07IE	COX14	COX14, cytochrome c oxidase assembly factor	0.0638217	0.00401207	1.53284	0.129976	0.999464	-4.46842
urqCpejScPSIefQ0kg	MTRF1	mitochondrial translation release factor 1	0.0642945	-0.00504052	1.53266	0.130022	0.999464	-4.46864
E5JUac65fXh3SzXYWM	PSMB2	proteasome subunit beta 2	0.0506086	-0.000794292	1.53239	0.130087	0.999464	-4.46896
KVb81O7U_GlNzvn32k	RNF213	ring finger protein 213	0.0661499	-0.00917886	1.53221	0.130131	0.999464	-4.46917
cZTmn.pM5.o8_tQqks	PANK2	pantothenate kinase 2	0.0655816	0.0320385	1.5317	0.130257	0.999464	-4.46978
Wy.n.x1I0gxeo_TNAk	RPSA	ribosomal protein SA	-0.141676	-0.0219056	-1.53148	0.130313	0.999464	-4.47005
ixRdX.VCkTYF4vJKCo	CCZ1B	CCZ1 homolog B, vacuolar protein trafficking and biogenesis associated	0.075463	0.0208208	1.53128	0.13036	0.999464	-4.47029
uoihOqCoUuzS_bojHI	PPP2R1B	protein phosphatase 2 scaffold subunit Abeta	0.0904802	-0.0142389	1.531	0.130431	0.999464	-4.47063
ZqbssL7IKdiqG6Hz_U	NET1	neuroepithelial cell transforming 1	-0.0508114	0.0148033	-1.53067	0.130513	0.999464	-4.47102
lmR0q3iknLJaKtFOC8	RPL26L1	ribosomal protein L26 like 1	0.0701978	0.0175762	1.52952	0.130795	0.999464	-4.47239
65m0l6Bqfj55Xwe73g	DDX31	DEAD-box helicase 31	0.0633733	0.0116561	1.52951	0.130799	0.999464	-4.47241
NjgSOEBN4BVdZHvFS4	TBC1D4	TBC1 domain family member 4	-0.079915	0.0124587	-1.52942	0.13082	0.999464	-4.47251
Ne73XpnXVcLz572Vns	TAOK2	TAO kinase 2	-0.0911139	-0.0171785	-1.5291	0.1309	0.999464	-4.4729
N6FLu6IV5IJIUq_kKc	ZGPAT	zinc finger CCCH-type and G-patch domain containing	0.137392	0.0168962	1.52901	0.130924	0.999464	-4.47301
Hrgvi4ii_KBughLid0	MGA	MGA, MAX dimerization protein	-0.078188	-0.00728464	-1.5289	0.130949	0.999464	-4.47313
EhSABCutGFUl9O5iGk	C21orf33	chromosome 21 open reading frame 33	0.0759929	-0.0112044	1.52856	0.131033	0.999464	-4.47354
EUeqRErh.ddQXU0tUo	SYNE3	spectrin repeat containing nuclear envelope family member 3	-0.097208	0.0431943	-1.52848	0.131054	0.999464	-4.47364
9XqVQCJySDWQH.Q3dw	RPS6	ribosomal protein S6	0.0429393	0.00314778	1.52799	0.131175	0.999464	-4.47422
Be1Z5u.1342oHXn3X4	MT1X	metallothionein 1X	0.130549	0.0909184	1.5279	0.131199	0.999464	-4.47434
Z_5NCdNll69uVhNXS0	ANO9	anoctamin 9	-0.0901105	-0.0358082	-1.52764	0.131263	0.999464	-4.47465
HcyOLSdRH4t3.yKgNI	FAM103A1	family with sequence similarity 103 member A1	0.0560925	-0.0339691	1.52729	0.131348	0.999464	-4.47506
TwlKEILkDl3_CQ9Kco	NHLRC3	NHL repeat containing 3	0.0534788	-0.00989548	1.52687	0.131453	0.999464	-4.47556
EYR7oeBEeCd46gBeuE	ABHD5	abhydrolase domain containing 5	-0.0626287	0.0104234	-1.5267	0.131496	0.999464	-4.47577
E16U4oQA8eLpXwIqC8	MYADM	myeloid associated differentiation marker	-0.136535	-0.0956204	-1.52666	0.131507	0.999464	-4.47582
Q1QkESFHfVflXVUioc	ARFGAP2	ADP ribosylation factor GTPase activating protein 2	0.0656785	-0.00040417	1.52661	0.131518	0.999464	-4.47587
9ndUbcRU0XUl4qZB4g	NDUFAF3	NADH:ubiquinone oxidoreductase complex assembly factor 3	0.138661	-0.0665743	1.5266	0.13152	0.999464	-4.47588
ZT0L1VKQ5oSIsF2iUI	MRPL46	mitochondrial ribosomal protein L46	0.0520739	0.012953	1.52637	0.131578	0.999464	-4.47616
3KgniZe6VzxzUvpd1Q	PRPSAP1	phosphoribosyl pyrophosphate synthetase associated protein 1	-0.0616836	0.0185352	-1.52628	0.1316	0.999464	-4.47627
9np0dNbUorq3Tr9P_c	N4BP3	NEDD4 binding protein 3	0.174258	0.0318926	1.5261	0.131644	0.999464	-4.47648
cnXqKSRSAqR4Dscno4	SNRNP200	small nuclear ribonucleoprotein U5 subunit 200	0.0820278	-0.0261892	1.52602	0.131666	0.999464	-4.47658
6Pkqj69SRXcDUSOULU	ZNF823	zinc finger protein 823	-0.0764857	-0.0112396	-1.52591	0.131692	0.999464	-4.4767
ifLKBjiRDl6HVRWle8	MTHFD1	methylenetetrahydrofolate dehydrogenase, cyclohydrolase and formyltetrahydrofolate synthetase 1	0.0776046	0.00113885	1.52558	0.131774	0.999464	-4.4771
0u0e_vooQupHiFeuFQ	RHBDD3	rhomboid domain containing 3	0.0905431	0.0376322	1.52511	0.131892	0.999464	-4.47766
0vilH61PJ6pJCNHHQY	HMGB3	high mobility group box 3	0.0915485	0.0205303	1.52489	0.131947	0.999464	-4.47793
WRSCySIJKqUicQSz30	MTMR11	myotubularin related protein 11	-0.143165	0.0146168	-1.52451	0.132042	0.999464	-4.47838
3Siu6oKKqP27v5OLuY	RETREG3	reticulophagy regulator family member 3	-0.115299	0.0136269	-1.52443	0.132062	0.999464	-4.47847
Wkk61eXylxeOgsCXQU	GSTM1	glutathione S-transferase mu 1	0.0435828	0.00404928	1.5235	0.132293	0.999464	-4.47958
ZqygilO.S9v93sq2Pg	GCNT1	glucosaminyl (N-acetyl) transferase 1, core 2	-0.0792575	-0.101998	-1.52347	0.132301	0.999464	-4.47962
36l80R6MOHuC54UR0U	PIPSL	PIP5K1A and PSMD4-like, pseudogene	0.0779173	0.0121155	1.52341	0.132314	0.999464	-4.47968
00oqlCBSqlNAJNqP6Q	MAST2	microtubule associated serine/threonine kinase 2	0.130448	-0.0230012	1.52334	0.132332	0.999464	-4.47977
KqKjqfNQUty86K15yU	HNRNPH2	heterogeneous nuclear ribonucleoprotein H2	0.0747919	0.00161353	1.523	0.132418	0.999464	-4.48017
oiUpRFtdJLtO7wAZQk	ALG2	ALG2, alpha-1,3/1,6-mannosyltransferase	-0.109183	-0.0872666	-1.52279	0.132469	0.999464	-4.48042
x_peKJ5e_6lJ59h558	TEX10	testis expressed 10	0.0545528	0.0427018	1.52261	0.132515	0.999464	-4.48064
KTRdHVIgL60ndUnR0k	LRRC8D	leucine rich repeat containing 8 VRAC subunit D	0.07874	0.0483945	1.52225	0.132606	0.999464	-4.48107
9m6I6RNfnnqh_lec.M	POLR3D	RNA polymerase III subunit D	-0.102331	-0.0184105	-1.52212	0.132638	0.999464	-4.48122
fLW.IiQFM_5d9N_FSk	ASXL2	additional sex combs like 2, transcriptional regulator	-0.0889562	-0.00661707	-1.52195	0.132681	0.999464	-4.48142
oTJA6SXYFPlS1Xxe6k	SNORA80E	small nucleolar RNA, H/ACA box 80E	0.104085	0.0258321	1.52119	0.132871	0.999464	-4.48233
uo5XRPrn910105Vf5Q	NLRX1	NLR family member X1	0.0601038	0.0390717	1.5209	0.132945	0.999464	-4.48268
WgChTgvkdP.XoXS3N0	DTWD1	DTW domain containing 1	0.0744276	0.0229216	1.52077	0.132977	0.999464	-4.48283
K60gHUIfJIkS41YLiI	ARMCX5	armadillo repeat containing, X-linked 5	0.0710716	0.0126543	1.52067	0.133	0.999464	-4.48294
0uNJKi.P4oTS0X_q_U	EML4	echinoderm microtubule associated protein like 4	-0.0700849	-0.00632476	-1.5202	0.133118	0.999464	-4.4835
lNIg5YutevgrAlIp7k	UBR1	ubiquitin protein ligase E3 component n-recognin 1	-0.072649	-0.00947004	-1.51914	0.133385	0.999464	-4.48476
6X6y5U2kDZDpJO4uhQ	ENOX2	ecto-NOX disulfide-thiol exchanger 2	-0.0888164	-0.00856659	-1.51911	0.133392	0.999464	-4.48479
Ekol9fEfZTi.XjYdSQ	GPR89B	G protein-coupled receptor 89B	-0.0733024	-0.0505182	-1.51898	0.133425	0.999464	-4.48495
x.VE8.t1OMUdCS7noU	MTRR	5-methyltetrahydrofolate-homocysteine methyltransferase reductase	-0.0631676	-0.000442838	-1.51751	0.133795	0.999464	-4.4867
3TFp6UagmOMHmaT3_I	WDR1	WD repeat domain 1	0.0875443	0.0142126	1.51751	0.133797	0.999464	-4.48671
f9SXlLTg3SEl5Rc_V4	ZNF586	zinc finger protein 586	0.0475241	0.0217222	1.5171	0.133899	0.999464	-4.48719
TA8nq7jpR_op4jKINk	PDE7A	phosphodiesterase 7A	-0.136979	-0.0859755	-1.51691	0.133946	0.999464	-4.48741
fftCuCoRC_UlFB.fl0	CCL23	C-C motif chemokine ligand 23	0.165385	-0.0196149	1.51683	0.133967	0.999464	-4.48751
cGUnqbSFUWqQX5IoYU	SPI1	Spi-1 proto-oncogene	0.0639804	-0.0149929	1.51673	0.133992	0.999464	-4.48763
fTS1QQjpcgNk90XZfk	MTMR11	myotubularin related protein 11	0.111546	0.0269911	1.51632	0.134096	0.999464	-4.48811
rwsKSiJ4fqHXp2lUEo	RNF185	ring finger protein 185	-0.0996953	0.002443	-1.51628	0.134106	0.999464	-4.48816
0KI6VQQkVZ.5JIoni8	ACTN4	actinin alpha 4	-0.0716335	0.0180013	-1.5159	0.134201	0.999464	-4.48861
TlzuclRAgz7dPJeDuU	PTGS2	prostaglandin-endoperoxide synthase 2	-0.216167	-0.0383588	-1.51561	0.134275	0.999464	-4.48896
KlB6fjr0PLCcP3VEVk	VASH2	vasohibin 2	-0.105473	0.00789608	-1.51527	0.13436	0.999464	-4.48935
Qv9W.zupDDtA7nOSUo	CHD1	chromodomain helicase DNA binding protein 1	-0.0546941	-0.0403946	-1.51423	0.134625	0.999464	-4.49059
fqa6oIEJMOsqop_l4A	PRELID3B	PRELI domain containing 3B	-0.213574	-0.0165563	-1.51415	0.134645	0.999464	-4.49068
oUtFATk2m7TCNTRJ5A	BRIX1	BRX1, biogenesis of ribosomes	-0.0680255	-0.00355059	-1.51412	0.134651	0.999464	-4.49071
QkTArUpkrAvnogm7rk	CMSS1	cms1 ribosomal small subunit homolog (yeast)	0.064933	0.0154789	1.51341	0.134832	0.999464	-4.49156
fUiK5lM.dN4P0eXpSE	PTPN13	protein tyrosine phosphatase, non-receptor type 13	-0.129785	-0.00346479	-1.51326	0.134871	0.999464	-4.49174
x4oS9Ioo9IYu2ebi6U	LTBP3	latent transforming growth factor beta binding protein 3	0.0925523	0.0321172	1.51304	0.134927	0.999464	-4.492
c.s.wi3TncW_gclI6U	COMMD2	COMM domain containing 2	-0.0456094	0.0271866	-1.51291	0.13496	0.999464	-4.49216
ZlMGq96krSHfSQhLs8	SENP5	SUMO1/sentrin specific peptidase 5	-0.0695311	0.017601	-1.51284	0.134977	0.999464	-4.49224
HlB_pz_giwCFEdRLqc	SNORA4	small nucleolar RNA, H/ACA box 4	0.132168	0.00190615	1.51237	0.135095	0.999464	-4.49279
EjUqOiOoK8gKSV0XeI	PLCG1	phospholipase C gamma 1	-0.0900237	-0.00485926	-1.51168	0.13527	0.999464	-4.4936
94ggSIWIXlV8UJlHk4	USP35	ubiquitin specific peptidase 35	0.105229	-0.011422	1.51156	0.1353	0.999464	-4.49374
ZStuSAH4h6r0qfuqt4	IL3RA	interleukin 3 receptor subunit alpha	-0.0905301	-0.0127473	-1.51154	0.135307	0.999464	-4.49378
B6ugFxXupFTtYlV6T8	TXNRD2	thioredoxin reductase 2	0.0691747	0.0102106	1.5115	0.135317	0.999464	-4.49382
fvorTwbx_xDntHu4TU	SLC39A10	solute carrier family 39 member 10	0.0932854	0.00227642	1.51114	0.135409	0.999464	-4.49425
udZ59RcGSXXl1l.v0w	F8A1	coagulation factor VIII associated 1	0.0884381	0.0308441	1.51086	0.135478	0.999464	-4.49457
QuR4kOirriolOeeD3o	TGIF2	TGFB induced factor homeobox 2	-0.0612511	-0.00871028	-1.51039	0.135599	0.999464	-4.49513
lh0gF1IoN7_fXjyNS0	EXT2	exostosin glycosyltransferase 2	0.0794262	0.00902075	1.51014	0.135664	0.999464	-4.49543
KpAdICHuMKdlIjl5Eo	STN1	STN1, CST complex subunit	-0.137557	-0.0505686	-1.5101	0.135672	0.999464	-4.49547
HqWpnv0nZ91VRdd3XQ	MIR1224	microRNA 1224	-0.122933	-0.00873833	-1.50958	0.135806	0.999464	-4.49609
xSb5.SNEfzURKAlLSU	BAG5	BCL2 associated athanogene 5	0.0979529	0.033004	1.50935	0.135864	0.999464	-4.49636
BvelINAj0lcQozv9e4	CLEC2D	C-type lectin domain family 2 member D	-0.0934174	-0.0384458	-1.50902	0.135949	0.999464	-4.49675
fe3.VIREuq_Kicp7.k	NANP	N-acetylneuraminic acid phosphatase	-0.112914	-0.00033286	-1.50891	0.135977	0.999464	-4.49688
B5OqsVQ3gtLA4HDcQk	RPL7	ribosomal protein L7	-0.0926844	-0.0336368	-1.50868	0.136034	0.999464	-4.49715
uhTUU0V.1X_v_Cl_Vw	TSPYL4	TSPY like 4	-0.112062	-0.0128464	-1.50856	0.136065	0.999464	-4.49729
NhKvV0ectJ9.6AehKU	WDR48	WD repeat domain 48	0.0765955	0.0314296	1.50807	0.13619	0.999464	-4.49786
3eq4qEnx1P4Uj7_nBE	STAMBP	STAM binding protein	0.0530861	0.0259046	1.50734	0.136378	0.999464	-4.49874
Ku.kHqiEgHuvjJS0eU	MYB	MYB proto-oncogene, transcription factor	-0.0703427	0.00733343	-1.50716	0.136422	0.999464	-4.49894
c.76K67BS5KH7kIIDU	PARG	poly(ADP-ribose) glycohydrolase	-0.0818659	-0.0198375	-1.50689	0.136494	0.999464	-4.49927
rr5wo6ngnqt6F9DQJc	PTTG1	pituitary tumor-transforming 1	0.0498164	0.0434087	1.50685	0.136504	0.999464	-4.49931
cC_9Xpaib_f2XsNUEc	TPM4	tropomyosin 4	-0.106691	0.0256362	-1.50671	0.13654	0.999464	-4.49948
Tld5ZCAS7iceUZ4AcU	MRPS7	mitochondrial ribosomal protein S7	0.0480297	-0.0273807	1.50661	0.136563	0.999464	-4.49959
KhJXu_50odHeeeugHQ	KDSR	3-ketodihydrosphingosine reductase	-0.0605852	0.000852243	-1.50613	0.136688	0.999464	-4.50016
iC30SkeTavt6ZX.XUk	SCARB1	scavenger receptor class B member 1	-0.0605545	0.01761	-1.50559	0.136827	0.999464	-4.5008
QO1_oo2QJLeuJ6IlGQ	CEP68	centrosomal protein 68	0.144289	0.0034574	1.50528	0.136906	0.999464	-4.50116
3SE1cen2eunTdgTUZQ	SLC27A1	solute carrier family 27 member 1	0.111807	0.017198	1.50524	0.136916	0.999464	-4.50121
BILE263R9VQSqKkCik	TAF6	TATA-box binding protein associated factor 6	0.139732	0.00954888	1.50499	0.136981	0.999464	-4.50151
3QkTjLqY4K0KKHRKVU	LRRC75B	leucine rich repeat containing 75B	-0.152971	0.0452148	-1.50487	0.137011	0.999464	-4.50164
HugJshCiOSs_uLaNkk	BCL2L1	BCL2 like 1	-0.104407	-0.00636668	-1.50465	0.137066	0.999464	-4.5019
6ut9ioyRiut4ShwR8U	TIMM23	translocase of inner mitochondrial membrane 23	0.0504615	0.0423049	1.50415	0.137195	0.999464	-4.50249
B.oKkK5ijn4pSi.hEk	ASL	argininosuccinate lyase	0.076051	0.00147581	1.50373	0.137302	0.999464	-4.50298
xgVbO4LtQcXf1I_Srg	MCAT	malonyl-CoA-acyl carrier protein transacylase	0.0801156	0.0291534	1.50372	0.137305	0.999464	-4.50299
fgfiHnkelvui1HRX2I	HERC2P2	hect domain and RLD 2 pseudogene 2	0.143977	0.0564031	1.50366	0.137321	0.999464	-4.50307
cFcSl0vX5IriqyItJc	MGLL	monoglyceride lipase	0.0688633	-0.05828	1.5035	0.137364	0.999464	-4.50326
copX1QruuHuXx7E52g	MSRB1	methionine sulfoxide reductase B1	-0.0573383	-0.0182218	-1.50336	0.137399	0.999464	-4.50342
EVSp6JRCjFdH_TiieA	TBC1D9B	TBC1 domain family member 9B	-0.0727832	0.0230261	-1.50306	0.137475	0.999464	-4.50377
TJo86PHOIUElLnUJWg	CCL14	C-C motif chemokine ligand 14	0.112227	-0.0806613	1.5029	0.137518	0.999464	-4.50396
oTl3uX2dOe.fWHoOX0	PNKD	paroxysmal nonkinesigenic dyskinesia	-0.0734324	-0.0670807	-1.50213	0.137715	0.999464	-4.50487
Qu7V3q1dQB3rS9CjlU	CCL25	C-C motif chemokine ligand 25	0.103197	-0.010628	1.50076	0.138069	0.999464	-4.50648
o5RKSV6hMoJ6iQoCrc	RPL13A	ribosomal protein L13a	0.045698	0.0485741	1.50018	0.13822	0.999464	-4.50716
ZUd3oKIeKp.sATy0vk	LAMP3	lysosomal associated membrane protein 3	0.0693435	0.0114719	1.50002	0.138261	0.999464	-4.50735
uaH_Fq_ig4EaKL1iFI	B4GALNT4	beta-1,4-N-acetyl-galactosaminyltransferase 4	0.123205	-0.0203424	1.49968	0.138347	0.999464	-4.50774
cpN.QldnevdKkk.1KY	LSM4	LSM4 homolog, U6 small nuclear RNA and mRNA degradation associated	0.0654794	0.0375952	1.49967	0.138351	0.999464	-4.50776
c9rEaGGWHdU0UJ5Xa8	C17orf97	chromosome 17 open reading frame 97	-0.17525	-0.00691036	-1.49911	0.138497	0.999464	-4.50842
HxN6t3O695J31.v0Io	TMPRSS3	transmembrane protease, serine 3	0.142782	-0.00440354	1.4984	0.138679	0.999464	-4.50924
xrR.n54VfXTL7_nPn0	CCL28	C-C motif chemokine ligand 28	-0.122159	-0.00660813	-1.49824	0.138721	0.999464	-4.50943
rLntXgkn3v1pooIQ6o	ARHGEF1	Rho guanine nucleotide exchange factor 1	0.0806339	0.02005	1.4982	0.138732	0.999464	-4.50949
BSm4lFuXpSDK..f0H4	SS18	SS18, nBAF chromatin remodeling complex subunit	0.169154	0.0346247	1.49755	0.138901	0.999464	-4.51025
ZeR5ueuGDUT03Q6CjU	GADD45A	growth arrest and DNA damage inducible alpha	0.0901571	0.0344828	1.49752	0.138908	0.999464	-4.51028
KG66eqLl6Oua6_O8Fw	TMEM79	transmembrane protein 79	0.0622083	-0.0149529	1.49741	0.138936	0.999464	-4.51041
Evf.7VQfeU39QXeKTk	NETO1	neuropilin and tolloid like 1	0.126462	0.0203004	1.49733	0.138956	0.999464	-4.5105
0vSeVXLh1u7gixr_J4	PMS2	PMS1 homolog 2, mismatch repair system component	-0.127834	0.0449537	-1.49721	0.138989	0.999464	-4.51064
WqfB.F1_AOE6H6ujr0	KLRF1	killer cell lectin like receptor F1	-0.152115	0.0103611	-1.49709	0.139019	0.999464	-4.51078
ilu.n9YkuBeOiuE0ek	TBC1D19	TBC1 domain family member 19	-0.0889225	0.0181432	-1.497	0.139044	0.999464	-4.51089
ZSOn7dKLvg7uVZ57eo	ZNF212	zinc finger protein 212	-0.0574386	0.00319515	-1.49659	0.13915	0.999464	-4.51137
cr6Aiee0l7ijlZeTtI	SPTBN4	spectrin beta, non-erythrocytic 4	0.127173	0.02097	1.49568	0.139387	0.999464	-4.51244
foAokg4p4ICCdyuPqo	ZNF638	zinc finger protein 638	-0.0912145	-0.0192869	-1.49526	0.139495	0.999464	-4.51292
Nien0qguc9EoUzUUV0	YPEL1	yippee like 1	0.151234	0.0629512	1.49518	0.139517	0.999464	-4.51302
NUuorH4NPmuv1Xuc90	GYPE	glycophorin E (MNS blood group)	0.0977097	0.068993	1.49489	0.139591	0.999464	-4.51336
3Qo4ejyl5fPt6l75JQ	SLC30A6	solute carrier family 30 member 6	-0.110653	0.0236139	-1.49455	0.139681	0.999464	-4.51376
cX7tIETvDUQBlU1SPU	WARS2	tryptophanyl tRNA synthetase 2, mitochondrial	-0.137968	0.0475367	-1.49409	0.139801	0.999464	-4.5143
9HEI7.o8Fp5Iq0Kfec	ETNK1	ethanolamine kinase 1	-0.0730733	-0.0189344	-1.49363	0.13992	0.999464	-4.51483
lJULUXt9NdV5HUh43k	EIF2B1	eukaryotic translation initiation factor 2B subunit alpha	0.0547998	0.024017	1.49324	0.140023	0.999464	-4.51529
xR4qnlIokgghDp4WwU	CCDC28B	coiled-coil domain containing 28B	0.0670752	-0.016008	1.49317	0.140041	0.999464	-4.51537
9kNH7l6i9yHJepiH00	POLR1B	RNA polymerase I subunit B	-0.108162	0.0156568	-1.49284	0.140125	0.999464	-4.51575
9OLvqKoKnq1t4uof5E	FDXR	ferredoxin reductase	0.213868	0.007036	1.49238	0.140247	0.999464	-4.5163
x9JfL65dfL_p1.uMKo	PABPC5	poly(A) binding protein cytoplasmic 5	-0.0843333	-0.00121217	-1.49232	0.140261	0.999464	-4.51636
roiPHIoiL4KJ4hH5c0	ARMC8	armadillo repeat containing 8	-0.0950649	0.0446577	-1.49189	0.140374	0.999464	-4.51686
3knAY4IJUHou_f4I4Y	ERGIC2	ERGIC and golgi 2	-0.0682082	-0.0251647	-1.49138	0.140507	0.999464	-4.51746
9oiqK0d.466V4F0968	ST3GAL5	ST3 beta-galactoside alpha-2,3-sialyltransferase 5	-0.0995917	-0.0506559	-1.49125	0.140542	0.999464	-4.51761
fgq.Uoebt514ne.ws4	NUCKS1	nuclear casein kinase and cyclin dependent kinase substrate 1	-0.0480964	-0.0156503	-1.49099	0.140611	0.999464	-4.51792
Nd_MIhR6W6mr3oS.Eg	LOC388692	uncharacterized LOC388692	-0.105814	0.00776139	-1.49087	0.140642	0.999464	-4.51806
Z_QKopNLtfpKeP3Kyg	CTGF	connective tissue growth factor	0.201796	-0.112298	1.49079	0.140664	0.999464	-4.51815
QXe3Us0UQD731_i7fo	HMGN4	high mobility group nucleosomal binding domain 4	-0.0439124	0.0422412	-1.49068	0.140692	0.999464	-4.51828
BUEfb8dYNKAVKVBpK4	MNDA	myeloid cell nuclear differentiation antigen	0.0693321	0.00868995	1.49058	0.140718	0.999464	-4.5184
06jt6JSj760.h05fgk	ACAT1	acetyl-CoA acetyltransferase 1	0.0567424	-0.00607359	1.49045	0.140752	0.999464	-4.51855
lOVVIjl.LsLJ6fqs0k	ATPAF1	ATP synthase mitochondrial F1 complex assembly factor 1	-0.0489055	0.0536393	-1.4904	0.140765	0.999464	-4.51861
BciIgq7qTi8qegASvo	LACC1	laccase domain containing 1	-0.113911	-0.0167434	-1.49026	0.140802	0.999464	-4.51877
0U1dO73SekeneU15dM	PLAGL1	PLAG1 like zinc finger 1	-0.103457	0.00734995	-1.49004	0.140859	0.999464	-4.51902
fih3cV_WzcKJ4rDEjU	GTF2F2	general transcription factor IIF subunit 2	-0.0413376	0.00768231	-1.48982	0.140918	0.999464	-4.51929
BrDYHur1ZRvSDp_h0I	WTAP	WT1 associated protein	0.0857361	0.03736	1.48952	0.140996	0.999464	-4.51963
3jh_0u9SuzfJwByIOU	PTGES3	prostaglandin E synthase 3	-0.112982	-0.0244988	-1.48952	0.140996	0.999464	-4.51963
rJQp6Hq_nku678ujFE	TNFRSF14	TNF receptor superfamily member 14	-0.0710568	-0.0592744	-1.48922	0.141074	0.999464	-4.51998
BVN3lH_Oc.q846pCOk	GCH1	GTP cyclohydrolase 1	0.0652661	0.0008332	1.48922	0.141075	0.999464	-4.51998
WK9E77S_dS_fXeISpU	BDP1	B double prime 1, subunit of RNA polymerase III transcription initiation factor IIIB	0.09812	-0.0419961	1.48892	0.141153	0.999464	-4.52033
KoL5XxK6hf_7w3v91U	ZYG11B	zyg-11 family member B, cell cycle regulator	0.0572285	0.0238405	1.48853	0.141257	0.999464	-4.52079
cQ5HqR.Y9ff1KdypCA	NR2C1	nuclear receptor subfamily 2 group C member 1	0.0794608	-0.00558205	1.48841	0.141289	0.999464	-4.52093
xVf19R_A5D8hIpXuuA	FAM220A	family with sequence similarity 220 member A	-0.0688358	-0.0162713	-1.4883	0.141315	0.999464	-4.52105
u_IS3Z7vlSi5LpGN3k	CRCP	CGRP receptor component	0.103501	-0.0191882	1.48827	0.141325	0.999464	-4.52109
Tn3XOK58qeTfr.KFHs	AGMAT	agmatinase	-0.0840216	0.0697815	-1.48794	0.14141	0.999464	-4.52147
KV7SOAOPRJ3pL1Qt6o	GCN1	GCN1, eIF2 alpha kinase activator homolog	-0.0600854	-0.00882271	-1.48737	0.141561	0.999464	-4.52214
0f3U31HvLlLiQx77kE	PLS1	plastin 1	-0.0950895	-0.0635892	-1.48735	0.141566	0.999464	-4.52216
9le_SKQ.juhPfN2oRE	VPS29	VPS29, retromer complex component	-0.0487969	-0.00401563	-1.48682	0.141707	0.999464	-4.52278
xK859TRLOTPkuuEOIU	SNORA1	small nucleolar RNA, H/ACA box 1	-0.11794	0.0155563	-1.48679	0.141715	0.999464	-4.52282
o6KHuEh.oS6Xfi9d5I	TTC4	tetratricopeptide repeat domain 4	-0.0407966	0.0158013	-1.4865	0.14179	0.999464	-4.52315
9eebDoPl_ITUgjUFYM	CENPK	centromere protein K	0.0591895	0.0281707	1.486	0.141922	0.999464	-4.52373
621XukIyO6_pTbq9Xg	KIF16B	kinesin family member 16B	0.134969	0.0594342	1.48592	0.141944	0.999464	-4.52383
BLR15Vd1eH650TkXRw	LAMTOR1	late endosomal/lysosomal adaptor, MAPK and MTOR activator 1	0.0561139	0.000477579	1.48542	0.142077	0.999464	-4.52441
WVONp1S5FV8KsJKUTM	SNX29	sorting nexin 29	-0.0596103	0.000505867	-1.4854	0.142081	0.999464	-4.52443
9iDnutZBFSNhB16q3g	LGALS9	galectin 9	0.0829827	-0.0436542	1.48492	0.142208	0.999464	-4.52499
lkqhK3QtfVJMREqBAQ	PDE6D	phosphodiesterase 6D	0.0479457	0.00354015	1.48436	0.142356	0.999464	-4.52564
x_JRky7RkXuNUnHyis	CCNB1IP1	cyclin B1 interacting protein 1	-0.0524754	0.0305764	-1.48418	0.142404	0.999464	-4.52585
u.Sdd76EzC5N376Eyk	HNRNPK	heterogeneous nuclear ribonucleoprotein K	-0.0494459	-0.00782891	-1.48411	0.142422	0.999464	-4.52593
i_p99ddTReAR6F6qyU	DDR1	discoidin domain receptor tyrosine kinase 1	-0.106857	0.026572	-1.48385	0.142491	0.999464	-4.52624
Qq47SrjBSE9OgKTkv4	CLK4	CDC like kinase 4	0.0739353	-0.00497184	1.48377	0.142512	0.999464	-4.52632
Qwuv1yFq2IkLdz61Qc	PSORS1C3	psoriasis susceptibility 1 candidate 3 (non-protein coding)	0.153339	0.0390265	1.48372	0.142525	0.999464	-4.52638
HrVfcM_l0wKr1Hsf1k	TNPO1	transportin 1	-0.0560897	0.0417139	-1.48368	0.142537	0.999464	-4.52644
lfg7eLirXnyd.pe4jk	PQLC1	PQ loop repeat containing 1	-0.0385133	-0.0392787	-1.48364	0.142547	0.999464	-4.52648
TPhZPdbnp.H_Sgnfok	RSC1A1	regulator of solute carriers 1	0.0780608	-0.0191858	1.48331	0.142633	0.999464	-4.52686
HuW7wdXQ6JEU7RxJWQ	RBMS1	RNA binding motif single stranded interacting protein 1	0.121124	0.0401025	1.48326	0.142648	0.999464	-4.52692
NM.ec5VusdTzOpJbTo	CEP170	centrosomal protein 170	0.129016	-0.018208	1.48282	0.142764	0.999464	-4.52743
iQCSjjBTNVUudNAsoQ	MND1	meiotic nuclear divisions 1	0.0650097	0.0424628	1.48267	0.142804	0.999464	-4.5276
3HoSIpeAO4SjTg7QK4	TAF1D	TATA-box binding protein associated factor, RNA polymerase I subunit D	-0.088787	-0.0343393	-1.48231	0.1429	0.999464	-4.52802
69QJLwVB1wQT.aqN4U	KYAT3	kynurenine aminotransferase 3	-0.0550819	-0.0236616	-1.4821	0.142956	0.999464	-4.52827
6Uup3plzp3u7nn.hEA	MAPK14	mitogen-activated protein kinase 14	0.10839	-0.0230744	1.482	0.142982	0.999464	-4.52838
uF1UPEeSztUIXFBTsg	TRIM48	tripartite motif containing 48	-0.161039	0.0426497	-1.48188	0.143013	0.999464	-4.52852
WqDx.4kKolP6i59CMU	GCSAM	germinal center associated signaling and motility	0.142145	0.0236205	1.48135	0.143153	0.999464	-4.52913
xY0Pq6ogg.0_1CRXSo	ZBTB8OS	zinc finger and BTB domain containing 8 opposite strand	0.0675859	-0.0211661	1.48122	0.143189	0.999464	-4.52929
cRRCU0r306pK4DH3FU	NEDD9	neural precursor cell expressed, developmentally down-regulated 9	-0.0867385	-0.0594518	-1.48118	0.143198	0.999464	-4.52933
EZ4st4okIovrf3tUuk	DMAC1	distal membrane arm assembly complex 1	0.06675	0.0234747	1.48105	0.143235	0.999464	-4.52949
9JVJ533Khc6pfbpN3s	SLC35D2	solute carrier family 35 member D2	-0.0856111	0.0295303	-1.481	0.143247	0.999464	-4.52954
BSRJpeeh3iB6gI0iQk	RSAD1	radical S-adenosyl methionine domain containing 1	0.0913869	-0.0554535	1.48047	0.143387	0.999464	-4.53016
fl.99_Jgnv4sBe_CLs	FBXO38	F-box protein 38	0.0847697	0.008684	1.48002	0.143508	0.999464	-4.53068
KW6.sdAlSDVQuXn.jg	CDH1	cadherin 1	-0.118941	0.0816727	-1.47944	0.143661	0.999464	-4.53135
3ebvSAX7jt_HvkUp4g	COMMD8	COMM domain containing 8	0.0555462	0.0087963	1.47942	0.143667	0.999464	-4.53138
ugt6isczSey_rD1C54	TMEM106B	transmembrane protein 106B	0.0844642	0.00247006	1.47921	0.143724	0.999464	-4.53162
N4OCV6LHOJqV4h6eeE	IFIT1	interferon induced protein with tetratricopeptide repeats 1	0.0724558	-0.0185416	1.4792	0.143727	0.999464	-4.53163
r21KiT.XU2S70KU19U	ENTPD1	ectonucleoside triphosphate diphosphohydrolase 1	0.0530592	-0.0190479	1.47917	0.143734	0.999464	-4.53167
rnEvniuqo_fiXqy0Kc	PCDHB19P	protocadherin beta 19 pseudogene	-0.116231	-0.043887	-1.47907	0.14376	0.999464	-4.53178
QcZ6LXge6sgBGF6f7I	TMEM51	transmembrane protein 51	-0.0846568	-0.0216807	-1.47873	0.143852	0.999464	-4.53218
[truncated: 13,569 more rows]
