# Supplementary material for: Integration of genomics and transcriptomics predicts diabetic retinopathy susceptibility genes
Source: eLife. 2020 Nov 9;9:e59980. doi: 10.7554/eLife.59980 (PMC7728435; doi:10.7554/eLife.59980)
Supplement: Figure 2—source data 4. [file elife-59980-fig2-data4.csv]

ILMN_1762337	ILMN_3241953	ILMN_1735045	ILMN_2375184	ILMN_1659452	ILMN_1755321	ILMN_1698554	ILMN_2061446	ILMN_1676336	ILMN_3237396	ILMN_1688755	ILMN_1653165	ILMN_1662364	ILMN_1674698	ILMN_1700461	ILMN_1784269	ILMN_1698189	ILMN_2096191	ILMN_1678323	ILMN_2157219	ILMN_1703743	ILMN_1699334	ILMN_1805104	ILMN_1766054	ILMN_2361400	ILMN_1758523	ILMN_1722286	ILMN_1784176	ILMN_1701551	ILMN_1795507	ILMN_1743205	ILMN_1720501	ILMN_1812070	ILMN_1665730	ILMN_1767349	ILMN_2193980	ILMN_1687840	ILMN_2343047	ILMN_2343048	ILMN_1802404	ILMN_1776119	ILMN_1788457	ILMN_2194009	ILMN_1706531	ILMN_1651964	ILMN_3244070	ILMN_1674032	ILMN_2330267	ILMN_1676846	ILMN_2392635
4.716736081	6.369502154	7.71555607	5.696060359	6.176524983	5.34232387	6.336678411	6.954566343	6.54085909	7.677540681	5.833901657	6.920404079	11.65509185	7.606272074	7.653283087	6.351268114	7.821726617	8.88176595	4.345818886	4.283609901	8.52660783	5.490227592	4.426503446	4.410470118	4.399644892	5.53354821	5.024160188	4.933432173	7.571528914	5.69432224	6.094986801	4.977951627	5.349948652	8.562647691	5.945814187	7.409040945	8.945082149	5.315335948	6.857413805	5.216091811	5.427683033	8.206899442	7.481537115	5.487311209	5.481208407	4.630756938	6.308932285	9.474951441	8.901282103	8.568990636
4.343313506	5.881423969	7.645856807	5.177420995	5.667865639	5.23788408	6.142408421	6.875328028	6.433779325	7.213820631	5.911273167	6.934900986	11.60766675	7.702590696	7.533464928	6.691835912	7.864561993	8.851750655	4.456617255	4.21821626	8.421756528	5.620617317	4.051159081	3.97949202	3.792842549	5.249677367	5.25674305	4.667318244	7.401129531	5.924371696	5.462374968	4.851916132	5.157630937	8.356041603	5.635300015	7.930402267	8.993943155	7.154434391	8.867170515	5.048461226	4.991501234	8.114185301	7.363449396	5.210677618	5.143543521	4.348628347	6.409796768	9.61357238	9.151556682	8.637178552
4.309361378	5.756647475	7.490537979	3.981809982	4.389842281	5.49773259	5.72835905	6.2875656	5.467966429	7.204084494	5.638940494	6.707955356	11.71498006	7.580975499	7.744371259	6.845588132	7.463810897	8.721236381	4.357618569	4.30006451	8.413554933	5.479252731	3.804473467	4.737572772	3.69303501	4.389856417	5.267017317	4.994810707	6.218988626	5.048341759	6.11023883	4.617347699	4.276117972	8.599696584	5.008089264	7.871462046	9.125349947	5.368148259	6.623221851	4.959722968	5.147739717	8.995841679	8.430167896	5.391284782	5.158280512	4.462551586	6.174990135	9.509378956	8.969683102	8.552137614
4.367914739	6.225829596	6.897358403	4.996680396	5.332393901	5.457891699	6.011188867	6.733953916	6.36317476	7.460294979	5.220013157	7.047020479	11.63050071	7.587580894	7.77213368	6.705540153	8.125949942	9.163321355	4.872959908	4.83811713	8.538284882	5.369136702	4.115579701	4.161661361	4.190960447	6.304576506	4.798307753	4.848435245	6.013210748	4.897555286	5.800490223	4.556773344	4.323755671	8.85240859	5.117754353	7.009203705	8.940852771	6.406448667	8.158733317	5.219660031	5.023110291	8.676504777	7.860453724	5.890834377	5.901709877	4.342572231	6.482841933	9.644041864	9.103219259	8.557217202
4.677368712	5.337726152	8.091310057	5.854395579	5.902788327	5.415788218	5.789847055	6.946642653	6.511962499	7.6199373	5.786403546	6.902841387	11.52788899	7.801990072	7.480549189	6.747330333	7.847895498	8.755140187	4.179975932	4.237576022	8.473869048	5.565085981	4.099748169	4.758765266	4.86336608	4.630387775	4.900011778	4.739411765	7.234108985	5.831488131	5.818021646	4.839473263	5.425722643	8.575755723	5.632270053	7.748781026	8.814488863	5.461085528	6.984510542	5.03916953	4.955124693	8.287278886	7.562699457	5.525853381	5.636546035	4.622262963	6.427254343	9.7374565	9.110864004	8.605101193
4.42164099	5.610420556	7.493892159	4.597848811	4.645221503	5.306225216	6.350157521	6.867697803	6.301175779	6.776999758	5.603312788	6.952910991	11.83220518	7.623252908	7.478741601	6.524652695	7.937583702	8.777125175	4.21630553	4.355805114	8.510124837	5.667253478	4.085910178	4.802444384	3.414258439	5.029200787	5.426005256	4.785419622	6.935734658	5.519333252	6.113369493	4.919314467	5.19995915	8.208206616	5.238653738	7.843488478	9.140542745	6.228358368	7.878332864	5.149587799	5.2441209	8.447236746	7.562902808	5.48854614	5.022200725	4.685356062	6.21633143	9.5710945	9.040131754	8.596264849
4.941926224	7.891209468	6.119062874	4.350591634	4.499711227	5.252811402	6.349802985	6.793653512	6.066044811	7.249146638	5.265602332	6.934014041	12.08923217	7.397138233	7.446953883	7.01225912	7.576377823	8.554933289	4.654945942	4.426888946	8.418315524	5.557363026	4.164636156	3.920625793	3.508133466	4.585407222	5.18471004	4.561173827	5.981755272	5.127512059	5.517013169	4.416114325	4.632627072	8.246290152	5.652326019	7.707107776	9.285114904	4.885172708	6.143216475	5.134091651	5.267442487	8.494420442	7.827258903	5.215081678	5.228589162	4.54108843	6.032069267	9.399483488	8.933691356	8.519016516
4.564306593	6.412721254	7.664600195	6.012636666	6.171936229	5.452833875	6.233854562	6.846610646	6.465026405	7.697069722	6.047166951	7.012000377	11.66851358	7.591033521	7.671168236	6.494404996	7.881579365	8.72293132	4.187723888	4.556875364	8.474854559	5.37191035	4.366571585	4.339695451	4.497430814	5.581621094	5.045431332	4.629663951	7.690327643	5.847887381	6.058305736	4.90810931	5.336904708	8.495048676	6.141101322	7.305015031	8.90246386	5.430442528	6.838746031	5.300950826	5.638973715	8.25411358	7.39565986	5.478040594	5.669444129	4.700016584	6.289436603	9.448259833	8.870514984	8.606642991
4.43030166	5.796975216	7.650484542	5.246629796	5.419992537	5.445406796	6.192821243	6.904493336	6.334339036	7.206033315	5.590375094	6.952379057	11.65296297	7.786047853	7.491664166	6.641634804	7.805948246	8.821004381	4.254276972	4.370024884	8.427136299	5.500248072	4.333698369	4.287289237	3.997041259	5.394166863	5.093635221	4.859173836	7.475249783	6.093818244	5.483353482	4.817559578	5.11088987	8.483617145	5.682638572	7.911887798	8.904982337	7.258213575	8.999860268	5.189654521	5.024632614	7.955373404	7.268334203	5.47204634	5.376527492	4.689309458	6.2918788	9.602424714	9.142788103	8.600648654
3.904333552	5.823122989	7.574440878	3.760190505	4.195189591	5.530504259	5.833073028	6.363555739	5.452039646	7.295346238	5.516981708	6.814460545	11.7806832	7.643822891	7.794399947	6.904471846	7.591473118	8.732306983	3.940981672	4.124969192	8.531522379	5.609424259	3.937991608	4.669805705	3.609866082	4.015614795	5.237186061	5.016680986	6.291591899	4.935221957	5.796694828	4.741481338	3.984905502	8.66841769	5.066390755	7.868386531	9.084964746	5.327228692	6.661289796	4.923316865	5.286300721	8.970595455	8.371186411	5.395656985	5.143550962	4.534203389	6.134196313	9.616176966	9.015440618	8.597580604
4.395978752	6.156355518	6.868330422	4.991113043	5.230918835	5.322409926	5.970065629	6.793036722	6.368385111	7.425216115	5.476374449	7.120306444	11.54236954	7.532130323	7.762245786	6.653656239	8.149544094	9.160867002	5.003735075	4.90622312	8.501493475	5.294914163	4.212590712	4.30521567	4.306183428	6.127333595	5.042013078	4.773348168	6.066620333	4.96830136	5.736943937	4.70515031	4.334517446	8.7329116	5.049512026	7.053155326	9.030295206	6.526625248	8.146988807	5.130604692	5.033079014	8.683398413	7.844520356	5.822226836	5.947429372	4.690236007	6.458346384	9.667472458	9.138955656	8.550942078
4.553669884	5.263124661	8.14452146	5.843079728	6.103489824	5.420740073	5.836275471	6.815223161	6.491771914	7.593814386	5.846939312	6.923900762	11.50712569	7.813972646	7.635087206	6.775580001	7.795095769	8.75167907	4.361861118	4.442449212	8.499624306	5.500361093	4.297434606	4.598854749	4.883702809	4.633939609	5.076553928	4.853402556	7.23988791	5.726170339	5.818909343	4.680889983	5.611497763	8.484863178	5.721300007	7.730900079	8.764593518	5.473333203	6.93951557	5.075656399	5.163229237	8.440687162	7.635226609	5.760697289	5.349105681	4.613254718	6.376171465	9.691608679	9.113721493	8.647187292
4.324538918	5.662861045	7.417141758	4.508204984	4.539206398	5.334406897	6.227862651	6.801165576	6.244231328	6.852529805	5.691415937	6.910809308	11.82237177	7.591586	7.666407367	6.593455258	7.894062088	8.729017514	4.213946555	4.380344407	8.495739285	5.36570851	4.148033161	4.938135341	4.127917597	5.077670147	5.382243017	4.783506997	6.919113428	5.465563238	5.94173023	4.797623403	5.503462972	8.243167516	5.240206388	7.769214066	9.132397883	6.284151917	7.918597884	5.313360661	5.30266209	8.377486981	7.542731123	5.381940348	4.991202731	4.661637918	6.107837161	9.602515237	9.0205717	8.622129252
4.917446915	7.925106647	6.098612084	4.060112189	4.371298557	5.392991017	6.404955335	6.763785303	6.218617143	7.220550744	5.503601959	6.972186356	12.12777675	7.341588234	7.66078653	6.981138712	7.618685647	8.632142548	4.528955294	4.358001249	8.378349758	5.467782707	4.010930265	3.969438357	3.925819293	4.568623366	5.03188767	4.61217766	5.924886531	4.87868666	5.483522768	4.679551537	4.556622472	8.304600597	5.882639358	7.663045525	9.352182284	4.867559658	6.157576657	5.279078207	5.040861319	8.348329538	7.580536612	5.042985703	4.998628301	4.468052615	5.993687571	9.410709056	8.960340161	8.450802224
4.776058577	6.033061845	7.215006682	5.827536685	6.099710739	5.334492664	6.200696699	6.775927764	6.508113209	7.203310108	6.061524825	7.036687259	11.62344439	7.671053525	7.71188034	6.656153262	8.042288177	8.99001022	4.063892842	4.275102878	8.527655555	5.421930651	3.988669077	4.591381062	3.392977298	4.670831589	4.555781856	4.395094958	7.805598355	6.500834791	5.865043549	4.766041977	4.38678791	8.495840118	5.72022926	7.475590064	8.945444651	6.059491581	7.744608251	5.240964068	5.153831844	7.900905006	7.137107972	5.548708895	5.55095195	4.506892309	6.374278219	9.638131434	9.180056019	8.62694587
4.233922233	6.150280591	7.00656999	3.860127909	4.272058739	5.350498253	5.895183779	6.870437626	6.524906569	7.362832948	5.812115135	6.885237822	11.95106576	7.668018714	7.798773094	6.700300757	8.117182289	9.113750891	4.264457859	4.319102328	8.340821958	5.489255304	4.51531587	4.647256871	4.516663298	5.367417049	5.243211712	5.167487118	6.286121571	5.268048173	5.983140296	4.922125457	4.969770011	8.721264396	5.070457892	7.624800644	8.796923757	6.904219777	8.714438353	5.295151931	5.413740267	8.122927899	7.445229222	5.793125229	5.601162998	4.469710623	6.087294352	9.441333955	8.937773463	8.415419474
4.611924318	6.370246306	8.147370958	7.168214231	7.410090228	5.348307197	6.020784201	6.873303298	6.513220172	7.734523557	6.12178782	7.115607048	11.51071639	7.529547741	7.699999549	6.733070984	8.027760796	8.962502297	4.168222833	4.271963108	8.46908896	5.16352759	3.804399363	3.760116232	5.200408033	4.848923331	4.903433951	4.709549323	7.198283193	5.751759208	5.455352841	5.20170008	5.07904363	8.68330387	5.536172944	7.357045202	8.943851212	4.961122078	6.017430239	5.400041803	5.102340203	8.326399612	7.536832735	5.512878034	5.655244194	4.451766772	6.486941151	9.634957493	9.170894231	8.6483334
4.597359944	6.665536639	7.228152849	6.858997356	7.220616664	5.452937727	5.931051895	6.758341769	6.240446425	7.39754925	5.688586024	7.222751607	11.5378885	7.574082628	7.983244557	6.895345866	7.676775014	8.731600974	4.236836988	4.639754898	8.510331332	5.355326608	4.053116632	4.696871313	3.762728471	4.665256971	4.340030949	4.340408499	6.97780688	5.619114385	5.802766607	4.483459906	4.04437998	8.594452212	5.163142009	7.40885091	8.751263601	6.12559951	7.842276366	5.055111738	5.368871017	9.008244781	8.26393648	5.704914901	5.731842166	4.584542921	6.321504997	9.423880825	8.979270395	8.703446173
4.582283225	5.582909864	8.220656779	4.626187386	5.248563226	5.317308645	6.368825156	6.909229295	6.431651474	7.636973021	6.020926929	6.924596571	11.78879267	7.756065633	7.082479647	6.435486034	7.905891046	8.661321898	4.038294856	4.354916824	8.408085578	5.403838121	4.365772285	4.702446768	4.944980722	4.901235337	4.933796914	5.004300251	7.138952677	5.806222528	5.906099123	4.828879518	6.443261291	8.291493724	6.022512654	7.940179408	8.780317974	6.151819758	7.667198651	5.200281344	5.355999593	8.089509232	7.260846596	5.071294815	5.407264091	4.663337372	6.2983411	9.369047344	8.948007469	8.658061104
4.674544866	5.773442316	7.467535867	5.432206126	5.821803127	5.154725788	6.183728362	6.768985875	6.476691125	7.360140813	5.897097137	7.045642386	11.60586666	7.591549738	7.55883635	6.763778259	8.001482512	8.823235955	4.415294273	4.194757679	8.494535732	5.39281729	4.315297702	4.410328595	3.942781355	5.012960947	4.729231292	4.288155999	7.879365583	6.386397073	5.664876901	4.752163999	4.869112343	8.607417104	6.18103251	7.468734822	9.009964419	5.467539763	7.084882293	5.174921218	5.178756451	7.98562578	7.333707818	5.729792397	5.384617539	4.731136549	6.335686465	9.618596502	9.132383316	8.555800393
4.216711062	5.73412288	7.012372832	5.161099012	5.470437813	5.623751475	6.228376692	6.901515423	6.427449715	7.643811925	5.737283348	7.040744466	11.8214906	7.816662035	7.470563942	6.616493621	7.971593075	8.799999861	4.413295436	4.653346702	8.585525076	5.634424079	4.741967909	4.22531664	4.381334009	5.295016975	5.132880052	4.727107294	7.17128432	5.636089246	5.861109981	4.784232973	5.881967894	8.467204294	5.654527178	7.463596858	8.872524801	6.085578176	7.616446692	5.508815344	5.597072549	8.140814113	7.454818571	5.422750895	5.43382078	4.353956383	6.344552723	9.733651736	9.199242656	8.658972217
4.343713354	6.171206979	6.990070432	4.766605244	5.06668822	5.102185809	6.358979789	6.782912375	6.102772104	6.940376521	5.276974867	6.960623607	11.71955727	7.55070174	7.885294755	6.99587056	7.812838738	8.700727243	5.889860271	5.554415267	8.417387127	5.561334855	4.431259398	4.071436075	5.040431975	6.281771529	5.244761983	5.158021717	6.359832715	5.234765345	5.998507463	4.733512742	4.684892397	8.13877074	5.619384142	7.713963202	9.332625831	4.762326824	5.857728924	5.169440282	5.05722169	8.810229358	8.044277595	6.315029509	5.614603547	4.471136741	6.002757242	9.390432965	8.987358319	8.293798499
4.653815965	5.943491359	7.226548823	5.832664776	6.080664247	5.397792598	6.138675409	6.745136558	6.476390221	7.410671233	5.968217229	7.03484776	11.66260233	7.718148634	7.713708165	6.646218055	7.919736867	8.948426776	4.077808762	4.181964941	8.508003613	5.46263775	4.119809421	4.430120743	3.543707078	4.767052645	4.54745367	4.130758582	7.736398618	6.309759569	6.180054712	4.821893243	4.285681007	8.525623852	5.647316862	7.457179832	8.90006944	6.10865913	7.739884896	5.152322544	5.102910383	7.826278364	7.240565046	5.50482422	5.489877835	4.61747776	6.310251181	9.609276655	9.131997762	8.628484127
4.273682763	6.079777806	7.17742948	4.059959366	4.438975427	5.436728898	5.737489119	6.911446768	6.360565831	7.277621067	5.747010677	6.986945511	11.95673871	7.57683491	7.682352323	6.871539587	8.008901863	9.044927669	4.289011108	4.397316743	8.412667652	5.541101697	4.742616152	4.623337481	4.513184202	5.346089806	5.272251335	5.167766343	6.408868945	5.21196377	5.756274127	4.680572165	4.974660569	8.708270511	5.031552848	7.674737181	8.775418933	7.055152631	8.833913857	5.189544754	5.142647753	8.201214927	7.507534705	5.940995231	5.691872587	4.586765862	6.168996839	9.425192254	8.880792129	8.499629292
4.498155684	6.38296732	8.070540498	7.175178099	7.364829194	5.338849337	6.010358127	6.793266988	6.474625805	7.749318423	6.246367915	6.995420683	11.57671456	7.649880117	7.728431417	6.607930455	7.942854009	8.967403605	4.418604794	4.038734876	8.484170154	5.187746903	4.105087629	3.952445959	5.167017012	4.685336745	4.885134647	4.661812849	7.215103225	5.851939934	5.4003026	5.335725281	4.833189127	8.635812786	5.668114361	7.354723154	8.989558336	4.837357428	6.138129472	5.198418486	5.13526226	8.286439211	7.577640906	5.527391472	5.73882504	4.571153142	6.435431755	9.621566903	9.198155369	8.697747196
4.677396906	6.728703101	7.153623137	6.979827784	7.140154534	5.503607847	6.006834887	6.629979069	6.269245319	7.238731546	5.767571833	7.058886613	11.51701089	7.620081614	7.930430524	6.843219177	7.621803668	8.746833874	4.413440269	4.363156746	8.460045421	5.43745399	3.939154024	4.774714131	3.773859184	4.833413147	3.975684651	4.518858647	6.99141075	5.652247698	5.864684406	4.31174458	4.199045694	8.618653761	5.155947004	7.304125284	8.838132451	5.867954766	7.685501767	5.235556653	5.149598642	9.023533462	8.171380723	5.517478662	5.762929392	4.75523537	6.151227149	9.480423384	8.846081366	8.612055565
4.47350701	5.796973239	8.088891712	4.485624724	5.0794571	5.613547599	6.524967138	6.868039414	6.446687286	7.690140472	5.865593147	7.051425362	11.73951409	7.76952649	7.201355081	6.381328438	7.944210628	8.74082296	3.869673953	4.560223593	8.426484597	5.507294039	4.21081197	4.2261148	4.829852098	4.48461724	5.032490123	4.951601192	7.19422407	5.577322859	5.935585933	4.988811293	6.390349765	8.386232488	5.963746914	7.884717	8.646788843	5.961326672	7.652835153	5.163708364	5.279080751	8.173617082	7.202571837	4.812121796	5.27777577	4.695927561	6.398789169	9.524147907	8.887679559	8.718222834
4.627530293	5.855211027	7.316687494	5.502250217	5.974055885	5.3387221	6.266939945	6.748366327	6.508842812	7.334752157	5.88625259	7.006239154	11.66019359	7.593493542	7.63230029	6.679158438	7.895436033	8.726724436	4.411940338	4.060281773	8.515279786	5.30781025	4.049290166	4.32908203	3.88161881	4.911252238	4.804251079	4.407853442	7.824791564	6.440533836	5.814528139	5.124960465	4.823406629	8.569117177	6.143807069	7.579687564	8.972127407	5.57308389	7.264984864	5.179661275	5.274917575	8.121028178	7.461577639	5.488965961	5.400324962	4.431221825	6.118656025	9.576114915	9.092295129	8.648955017
4.449967654	5.687130248	7.09943987	5.253623906	5.614120806	5.627547131	6.27359204	6.881557951	6.415118861	7.643973042	5.613945871	6.962062872	11.83019459	7.815244606	7.512619139	6.639306443	7.849922929	8.813594057	4.66076448	4.426277141	8.655448654	5.441826036	4.482429201	4.450119144	4.441263664	5.291849927	5.002071808	4.635759148	7.244810298	5.748024323	5.980091473	4.711057885	5.676237082	8.365025298	5.654216799	7.578418435	8.826897458	6.154556049	7.78891938	5.494408867	5.582033404	8.090302461	7.275691074	5.469824272	5.447095277	4.488767912	6.230339351	9.571146986	9.176248345	8.726155756
4.631403097	6.160820459	6.94317971	4.743796567	5.139971918	5.124658908	6.265444301	6.773325152	6.099204805	6.949900734	5.043871239	6.887662049	11.74051926	7.517140042	7.913349871	6.925721679	7.730765111	8.610163456	5.792170183	5.500680519	8.332048581	5.582902687	4.576731914	4.125043336	4.925171896	6.368988057	5.250004564	4.829501745	6.075195326	5.036339062	6.023899789	4.642161309	4.554077436	8.203403816	5.542931737	7.594751159	9.372413111	4.89032476	5.922229341	5.322717082	5.057463638	8.908551657	8.038288168	6.354076573	5.595371654	4.521995256	5.957991865	9.284593153	8.854304752	8.302316262
4.526916338	5.924291949	5.580714305	3.884185848	4.297689722	5.328302856	5.86848498	6.700558683	5.981403199	7.40744706	5.37192809	7.378297449	11.32595272	7.642657676	7.785513612	6.556519721	8.117247145	9.169343692	4.298826382	4.127742368	8.424570755	5.433329014	4.832908048	3.810001359	6.251241102	6.254121889	5.121067137	4.958321349	6.555532251	5.716100705	5.563546864	4.544969116	4.973017042	8.395100011	5.250563359	7.203818839	8.887667369	5.38496864	6.822417508	5.053152292	5.242379586	8.363914586	7.60731128	5.86620018	6.053402766	4.598563816	6.566630515	9.720611525	9.276174519	8.548271386
4.393365382	5.983401324	6.811791984	4.343185545	4.651098166	5.51194419	6.10163907	6.728010467	5.943043271	7.475523904	5.175081534	6.958088235	11.77063275	7.573057341	7.570251041	6.793044567	7.884336476	8.942718419	4.375903021	4.467881915	8.513429481	5.637246829	4.327569815	3.635355826	4.839382458	5.158192584	5.230155599	4.806224852	6.107378128	5.046719732	5.297066042	4.74495279	5.010143013	8.442829452	5.170767012	7.500903389	9.175418603	5.669443071	7.417465727	4.98084315	5.135985801	8.324157867	7.668001469	5.307739688	5.191250859	4.594663414	6.296079885	9.538439861	9.10400944	8.414465921
4.445573368	6.28741833	7.383591169	5.098280048	5.423959219	5.401927615	6.151380097	6.736317667	6.330529852	7.154161387	5.653811462	6.936809986	11.58502111	7.600968048	7.858009743	6.674856539	7.940110176	9.006355595	4.314088915	4.025842723	8.598524671	5.595064643	3.876634182	4.724568033	4.458480392	5.195663887	5.070679813	4.6574437	7.559288876	6.347254745	5.625050011	4.964089088	4.867826957	8.485558337	5.753479497	7.808825013	9.118828557	5.507643321	7.035797341	4.729372046	5.155086592	8.212388516	7.476606077	5.337734601	5.346950223	4.516217097	6.441813683	9.494974619	9.02366484	8.421182774
4.566464585	6.333880483	7.607642714	6.242196917	6.428921904	5.433512388	6.218795558	6.923733052	6.6908056	6.922030867	5.933859343	7.075143611	11.96581316	7.552709286	7.445250542	6.499376485	7.885396319	8.665064225	4.26161873	4.015594725	8.57689988	5.542330383	4.001478666	3.986368056	3.890862996	4.660635288	4.658863299	4.509050432	6.159111766	5.304659785	5.545194511	4.538619191	5.203502518	8.360403563	6.278972064	7.476489439	8.95496579	4.674831734	5.609959375	5.054373606	4.861739985	8.667149278	7.974805641	5.377279273	5.28282662	4.663844129	6.477433931	9.535219472	8.978341751	8.265049915
4.271027871	6.164492008	7.425453417	5.032406896	5.240779168	5.545771064	6.262164551	6.791850027	6.359333749	7.477052783	5.45251287	6.989553789	11.66821331	7.677280724	7.351527837	6.69101433	7.779398464	8.90224286	4.41372464	4.274758822	8.436345177	5.411268404	4.421095403	4.281393607	3.497847314	5.526117976	4.744092008	4.575013941	6.347046687	5.397730669	5.606584905	4.576619055	5.091601441	8.598216916	5.581425263	7.167875248	9.002049486	5.82865074	7.365455976	5.243356883	4.753809408	8.50976056	7.906613506	5.308009266	5.341056281	4.552990923	6.357000538	9.440100284	9.015216782	8.718036902
4.040173738	6.266169817	6.992617576	3.635674885	4.395865317	5.315035646	6.063677932	6.423328368	5.642222199	7.226036531	5.370698539	6.955297759	11.82118105	7.650123152	7.807215242	6.586940055	7.876789568	8.806436246	4.440304275	4.296167306	8.46657113	5.509315438	5.32632942	4.840084863	3.550725312	6.311756099	5.448705215	5.13620087	5.786577877	5.062177689	5.845877849	4.528199416	5.765508026	8.549952303	5.135655937	7.307480197	9.235070582	4.979819343	6.171556183	5.034402575	5.651826403	8.898771056	8.395580302	5.837607877	5.44911286	4.307491006	6.146410058	9.542423546	9.03988827	8.317263854
4.335714738	6.060546995	7.584091361	5.010757041	5.193759964	5.382196896	6.049285377	6.626650169	6.032305218	7.248686271	5.632674603	7.107965649	11.65027601	7.597827026	7.768790596	6.714122087	7.975228782	9.012913829	4.113147903	4.029563565	8.460224469	5.35597683	4.485477262	5.179895157	4.04567284	5.33182217	5.157543545	4.792758009	7.374663854	5.911589376	5.672494247	4.85174174	4.351205	8.842250823	5.224733145	6.976179745	8.905717768	5.751108811	7.286921553	5.056609707	4.848342596	8.721817501	7.902131737	5.541601536	5.249675912	4.524843221	6.403118694	9.513806547	8.97406089	8.478002376
4.50961826	5.65594335	5.553503865	3.576988477	4.098727244	5.329714101	6.007372165	6.55756236	6.101586289	7.510126418	5.485203788	7.309112255	11.29729352	7.821495908	7.79284867	6.523372734	8.19859822	9.206588974	4.166981218	4.435972459	8.496842831	5.518216046	4.740601739	4.010967736	6.227491696	6.357950903	4.943366689	5.018801974	6.414904168	5.338966682	5.670627436	4.60813833	4.875613471	8.479902144	4.925750644	6.995319967	8.989695913	5.396055336	6.915751966	5.053298316	5.333802618	8.415593321	7.729812271	6.018751934	6.11369356	4.512256808	6.532479077	9.900525278	9.251277169	8.670996062
4.217689381	5.729352824	6.713390749	4.522082942	4.639287436	5.45839783	6.039933997	6.611292447	5.755496028	7.400948824	5.437684039	6.914748181	11.83178523	7.433525416	7.553794901	6.865731591	7.72937233	8.977678735	4.461548535	4.435823743	8.473325548	5.454267753	4.352661668	4.043974438	4.937618144	5.176114152	5.527735169	4.975740227	6.081728196	5.0599269	5.398778372	4.855342709	4.944943926	8.269385672	5.1804327	7.428247783	9.183037624	5.773587325	7.387976593	5.082084453	5.122166082	8.330838275	7.680581558	5.37090542	5.148570011	4.559543393	6.313847469	9.59157211	9.060906114	8.349866754
4.605686261	6.256464689	7.506595426	5.00890226	5.456386657	5.587027606	6.239230348	6.839070873	6.267924506	7.112632167	5.444611044	6.976411427	11.69607091	7.686390126	7.695393341	6.701945947	7.926458031	8.993547998	4.380506022	3.910121387	8.695554207	5.450918935	4.185332127	4.670995919	4.481747925	5.15795651	4.838292667	4.828558865	7.622133381	6.084417435	5.80933478	4.817099289	4.97415842	8.575156096	5.737858709	7.911979996	8.909783599	5.784738449	7.357833225	4.969167891	5.091178868	8.286781383	7.622623634	5.15754697	5.366898279	4.46418425	6.392594626	9.582048979	8.958125704	8.512952189
4.595540969	6.309467972	7.344204953	6.486806726	6.711412979	5.303446642	6.034561269	6.965569646	6.771230921	6.894081744	6.010997062	6.876483486	11.90440114	7.43054784	7.417570063	6.503785076	7.945603301	8.691600527	4.486902576	4.338677766	8.459702397	5.341293897	4.316683475	4.15300024	3.811177772	4.689851294	4.71404235	4.257885687	6.110682403	5.312010852	5.959481246	4.423579577	5.20952962	8.371210067	6.309772745	7.351594651	9.083654227	4.722375474	5.753149068	5.144906933	5.11167673	9.064463862	8.269892786	5.260650556	5.086732888	4.618368673	6.283169186	9.44608679	9.07814316	8.30891174
4.678113499	6.064638824	7.27700478	5.173122511	5.403169708	5.520404351	6.239662445	6.77068751	6.292515437	7.486220165	5.551165526	7.113227728	11.6841197	7.621540316	7.260235031	6.708144078	7.775323583	8.841965012	4.134464567	4.378486572	8.418643749	5.436130945	4.17559523	4.242069248	3.546525528	5.323748385	5.094694986	4.504885259	6.412066197	5.212874987	5.599192607	4.704721705	5.055010558	8.614786422	5.588614153	7.127833072	8.967207846	5.936619695	7.542943139	5.236107615	4.910410547	8.44992066	7.77009257	5.319124185	5.315103555	4.701039707	6.359316763	9.510101503	9.030030725	8.625390822
4.013033365	6.434815845	7.110721116	3.927554026	4.113318905	5.421469892	5.952439515	6.526101667	5.80501433	7.398879611	5.330627218	6.922783486	11.77416844	7.613707676	7.782099023	6.590435935	7.881894007	8.881806458	4.392413318	4.214750979	8.447098398	5.53384527	5.317639904	4.682241039	3.379655035	6.298409016	5.468764511	5.186904204	5.672479915	4.937565492	5.785463321	4.570352793	5.583910802	8.505775769	5.121225413	7.192263948	9.136209997	4.931138293	6.341601283	5.111337641	5.729775919	8.960982436	8.344494985	5.860363875	5.654517949	4.726766632	6.277975935	9.607932386	9.039223121	8.308967283
4.385492084	6.166559204	7.702063721	5.129510478	5.423519038	5.471254749	6.030803955	6.628955144	6.181336961	7.450173645	5.450863979	7.13284015	11.59821424	7.564813775	7.791963115	6.847969796	7.977349936	9.067275001	4.031919176	4.165293853	8.512507392	5.266848777	4.729334296	4.877298732	4.030996921	5.32291595	4.969675765	4.737364768	7.367672422	5.956227766	6.019196247	4.733514746	4.27159078	8.712223714	5.351570705	7.022816535	8.928457284	5.768996519	7.179433468	4.895551753	4.719379274	8.74963269	8.069717322	5.518396366	5.293673922	4.566329773	6.49876786	9.495023709	9.011792394	8.490639729
[truncated: 5,000 more columns]
