# Supplementary material for: Integration of genomics and transcriptomics predicts diabetic retinopathy susceptibility genes
Source: eLife. 2020 Nov 9;9:e59980. doi: 10.7554/eLife.59980 (PMC7728435; doi:10.7554/eLife.59980)
Supplement: Figure 2—source data 5. [file elife-59980-fig2-data5.csv]

	illumina_probe_id	geneSymbol
ILMN_1762337	ILMN_1762337	MACC1
ILMN_3241953	ILMN_3241953	GGACT
ILMN_1735045	ILMN_1735045	A4GALT
ILMN_2375184	ILMN_2375184	NPSR1-AS1
ILMN_1659452	ILMN_1659452	NPSR1-AS1
ILMN_1755321	ILMN_1755321	AAAS
ILMN_1698554	ILMN_1698554	AACS
ILMN_2061446	ILMN_2061446	NCEH1
ILMN_1676336	ILMN_1676336	NCEH1
ILMN_3237396	ILMN_3237396	AAGAB
ILMN_1688755	ILMN_1688755	AAK1
ILMN_1653165	ILMN_1653165	AAMP
ILMN_1662364	ILMN_1662364	AARS
ILMN_1674698	ILMN_1674698	AARS2
ILMN_1700461	ILMN_1700461	PTGES3L-AARSD1
ILMN_1784269	ILMN_1784269	AASDH
ILMN_1698189	ILMN_1698189	AASDHPPT
ILMN_2096191	ILMN_2096191	AASDHPPT
ILMN_1678323	ILMN_1678323	AASS
ILMN_2157219	ILMN_2157219	AASS
ILMN_1703743	ILMN_1703743	AATF
ILMN_1699334	ILMN_1699334	AATK
ILMN_1805104	ILMN_1805104	ABAT
ILMN_1766054	ILMN_1766054	ABCA1
ILMN_2361400	ILMN_2361400	ABCA12
ILMN_1758523	ILMN_1758523	ABCA3
ILMN_1722286	ILMN_1722286	ABCA5
ILMN_1784176	ILMN_1784176	ABCA5
ILMN_1701551	ILMN_1701551	ABCA6
ILMN_1795507	ILMN_1795507	ABCA6
ILMN_1743205	ILMN_1743205	ABCA7
ILMN_1720501	ILMN_1720501	ABCA9
ILMN_1812070	ILMN_1812070	ABCB1
ILMN_1665730	ILMN_1665730	ABCB10
ILMN_1767349	ILMN_1767349	ABCB4
ILMN_2193980	ILMN_2193980	ABCB6
ILMN_1687840	ILMN_1687840	ABCB7
ILMN_2343047	ILMN_2343047	ABCB9
ILMN_2343048	ILMN_2343048	ABCB9
ILMN_1802404	ILMN_1802404	ABCC1
ILMN_1776119	ILMN_1776119	ABCC10
ILMN_1788457	ILMN_1788457	ABCC4
ILMN_2194009	ILMN_2194009	ABCC4
ILMN_1706531	ILMN_1706531	ABCC5
ILMN_1651964	ILMN_1651964	ABCC5
ILMN_3244070	ILMN_3244070	ABCC6P2
ILMN_1674032	ILMN_1674032	ABCD3
ILMN_2330267	ILMN_2330267	ABCE1
ILMN_1676846	ILMN_1676846	ABCE1
ILMN_2392635	ILMN_2392635	ABCF1
ILMN_1763875	ILMN_1763875	ABCF1
ILMN_1781999	ILMN_1781999	ABCF2
ILMN_1669201	ILMN_1669201	ABCF2
ILMN_1810085	ILMN_1810085	ABCF3
ILMN_1658176	ILMN_1658176	ABCG1
ILMN_2329927	ILMN_2329927	ABCG1
ILMN_1794782	ILMN_1794782	ABCG1
ILMN_1770031	ILMN_1770031	ABHD10
ILMN_2338268	ILMN_2338268	ABHD11
ILMN_1745116	ILMN_1745116	ABHD12
ILMN_2318685	ILMN_2318685	ABHD12
ILMN_2245305	ILMN_2245305	ABHD12
ILMN_1794213	ILMN_1794213	ABHD14A
ILMN_2227533	ILMN_2227533	ABHD14B
ILMN_1769390	ILMN_1769390	ABHD15
ILMN_2403446	ILMN_2403446	ABHD2
ILMN_1723662	ILMN_1723662	ABHD2
ILMN_1801767	ILMN_1801767	ABHD3
ILMN_1700633	ILMN_1700633	ABHD4
ILMN_1655702	ILMN_1655702	ABHD5
ILMN_1706344	ILMN_1706344	ABHD6
ILMN_1712707	ILMN_1712707	ABHD8
ILMN_2329958	ILMN_2329958	ABI1
ILMN_1755658	ILMN_1755658	ABI3
ILMN_1713732	ILMN_1713732	ABL1
ILMN_1708922	ILMN_1708922	ABL1
ILMN_1785424	ILMN_1785424	ABLIM1
ILMN_1731610	ILMN_1731610	ABLIM1
ILMN_2396672	ILMN_2396672	ABLIM1
ILMN_1672878	ILMN_1672878	ABR
ILMN_1658083	ILMN_1658083	ABT1
ILMN_1802096	ILMN_1802096	ABTB1
ILMN_1753370	ILMN_1753370	ABTB2
ILMN_1738921	ILMN_1738921	ACAA1
ILMN_1660199	ILMN_1660199	ACAA2
ILMN_2331636	ILMN_2331636	ACACA
ILMN_1772123	ILMN_1772123	ACACA
ILMN_1687303	ILMN_1687303	ACAD10
ILMN_1761058	ILMN_1761058	ACAD11
ILMN_2225595	ILMN_2225595	ACAD8
ILMN_1775579	ILMN_1775579	ACAD9
ILMN_1778104	ILMN_1778104	ACADM
ILMN_2053679	ILMN_2053679	ACADM
ILMN_1795104	ILMN_1795104	ACADS
ILMN_1740920	ILMN_1740920	ACADSB
ILMN_2263466	ILMN_2263466	ACADVL
ILMN_1806408	ILMN_1806408	ACADVL
ILMN_2352009	ILMN_2352009	ACADVL
ILMN_1808395	ILMN_1808395	ACAP1
ILMN_3236270	ILMN_3236270	ACAP2
ILMN_1800008	ILMN_1800008	ACAT1
ILMN_2133799	ILMN_2133799	ACAT2
ILMN_1708672	ILMN_1708672	ACAT2
ILMN_1665945	ILMN_1665945	ACBD3
ILMN_1676288	ILMN_1676288	ACBD4
ILMN_1693250	ILMN_1693250	ACBD5
ILMN_1684271	ILMN_1684271	ACBD6
ILMN_3187680	ILMN_3187680	ACCS
ILMN_1716480	ILMN_1716480	ACD
ILMN_3235340	ILMN_3235340	ACER2
ILMN_3237774	ILMN_3237774	ACER3
ILMN_1699636	ILMN_1699636	ACIN1
ILMN_2371379	ILMN_2371379	ACLY
ILMN_1749014	ILMN_1749014	ACLY
ILMN_1771348	ILMN_1771348	SDHAF3
ILMN_2134039	ILMN_2134039	SDHAF3
ILMN_1750800	ILMN_1750800	ACO1
ILMN_1654861	ILMN_1654861	ACO2
ILMN_1715543	ILMN_1715543	ACOT1
ILMN_1716237	ILMN_1716237	ACOT2
ILMN_1764321	ILMN_1764321	ACOT4
ILMN_1784756	ILMN_1784756	ACOT7
ILMN_1740265	ILMN_1740265	ACOT7
ILMN_2332250	ILMN_2332250	ACOT7
ILMN_1679600	ILMN_1679600	ACOT8
ILMN_2367070	ILMN_2367070	ACOT9
ILMN_1658995	ILMN_1658995	ACOT9
ILMN_1750158	ILMN_1750158	ACOX1
ILMN_1743396	ILMN_1743396	ACOX3
ILMN_1669633	ILMN_1669633	ACP1
ILMN_2344956	ILMN_2344956	ACP1
ILMN_2104830	ILMN_2104830	ACP2
ILMN_2078599	ILMN_2078599	ACP5
ILMN_2234343	ILMN_2234343	ACP6
ILMN_1758323	ILMN_1758323	ACPP
ILMN_1666690	ILMN_1666690	GCNA
ILMN_2227011	ILMN_2227011	ACSBG1
ILMN_3236756	ILMN_3236756	ACSF2
ILMN_1684585	ILMN_1684585	ACSL1
ILMN_2360705	ILMN_2360705	ACSL3
ILMN_1654414	ILMN_1654414	ACSL3
ILMN_1666096	ILMN_1666096	ACSL3
ILMN_2391458	ILMN_2391458	ACSL4
ILMN_1683598	ILMN_1683598	ACSL4
ILMN_2370882	ILMN_2370882	ACSL5
ILMN_1705247	ILMN_1705247	ACSL5
ILMN_1685952	ILMN_1685952	ACSM3
ILMN_1662738	ILMN_1662738	ACSM3
ILMN_1771084	ILMN_1771084	ACSM3
ILMN_1752269	ILMN_1752269	ACSS1
ILMN_1697510	ILMN_1697510	ACSS2
ILMN_2336595	ILMN_2336595	ACSS2
ILMN_1714197	ILMN_1714197	ACSS2
ILMN_1659885	ILMN_1659885	ACSS3
ILMN_1671703	ILMN_1671703	ACTA2
ILMN_2152131	ILMN_2152131	ACTB
ILMN_1777296	ILMN_1777296	ACTB
ILMN_2038777	ILMN_2038777	ACTB
ILMN_2053178	ILMN_2053178	ACTG1
ILMN_1704961	ILMN_1704961	ACTG1
ILMN_1749297	ILMN_1749297	ACTL6A
ILMN_2328280	ILMN_2328280	ACTL6A
ILMN_2232177	ILMN_2232177	ACTN1
ILMN_1725534	ILMN_1725534	ACTN4
ILMN_1798254	ILMN_1798254	ACTR10
ILMN_1792314	ILMN_1792314	ACTR1A
ILMN_1695821	ILMN_1695821	ACTR1B
ILMN_2388605	ILMN_2388605	ACTR2
ILMN_1657153	ILMN_1657153	ACTR3
ILMN_2260392	ILMN_2260392	ACTR3B
ILMN_1787513	ILMN_1787513	ACTR3B
ILMN_1652594	ILMN_1652594	ACTR5
ILMN_1697585	ILMN_1697585	ACTR6
ILMN_1689162	ILMN_1689162	ACTR8
ILMN_1815392	ILMN_1815392	ACTRT1
ILMN_1760490	ILMN_1760490	ACVR1
ILMN_2243308	ILMN_2243308	ACVR1B
ILMN_2152711	ILMN_2152711	ACVR2A
ILMN_1683883	ILMN_1683883	ACY1
ILMN_1670193	ILMN_1670193	ACY3
ILMN_2319825	ILMN_2319825	ACYP1
ILMN_1694233	ILMN_1694233	ACYP1
ILMN_1686432	ILMN_1686432	ACYP1
ILMN_2158705	ILMN_2158705	ACYP2
ILMN_1803686	ILMN_1803686	ADA
ILMN_1725043	ILMN_1725043	ADAL
ILMN_2148360	ILMN_2148360	ADAM10
ILMN_1718946	ILMN_1718946	ADAM10
ILMN_2384544	ILMN_2384544	ADAM15
ILMN_1756920	ILMN_1756920	ADAM15
ILMN_2121068	ILMN_2121068	ADAM17
ILMN_1765779	ILMN_1765779	ADAM17
ILMN_1713751	ILMN_1713751	ADAM19
ILMN_1675210	ILMN_1675210	ADAM22
ILMN_2060086	ILMN_2060086	ADAM23
ILMN_1708348	ILMN_1708348	ADAM8
ILMN_1727524	ILMN_1727524	ADAM9
ILMN_2103107	ILMN_2103107	ADAMDEC1
ILMN_1767362	ILMN_1767362	ADAMTS6
ILMN_1721495	ILMN_1721495	ADAMTSL2
ILMN_3247424	ILMN_3247424	ADAP1
ILMN_1763000	ILMN_1763000	ADAP2
ILMN_1776777	ILMN_1776777	ADAR
ILMN_2320964	ILMN_2320964	ADAR
ILMN_2319326	ILMN_2319326	ADARB1
ILMN_1679797	ILMN_1679797	ADARB1
ILMN_1657139	ILMN_1657139	ADAT1
ILMN_3245693	ILMN_3245693	ADAT2
ILMN_1806275	ILMN_1806275	ADAT3
ILMN_1698777	ILMN_1698777	ADCK1
ILMN_1663132	ILMN_1663132	ADCK2
ILMN_1700349	ILMN_1700349	COQ8B
ILMN_1761309	ILMN_1761309	ADCK5
ILMN_2120555	ILMN_2120555	ADCY1
ILMN_1742073	ILMN_1742073	ADCY1
ILMN_1676893	ILMN_1676893	ADCY3
ILMN_2311674	ILMN_2311674	ADCY6
ILMN_1685156	ILMN_1685156	ADCY6
ILMN_1655935	ILMN_1655935	ADCY7
ILMN_2356786	ILMN_2356786	ADD1
ILMN_1759252	ILMN_1759252	ADD1
ILMN_1787378	ILMN_1787378	ADD3
ILMN_1814526	ILMN_1814526	ADD3
ILMN_2311278	ILMN_2311278	ADD3
ILMN_1738604	ILMN_1738604	ADH5
ILMN_1702858	ILMN_1702858	ADHFE1
ILMN_1813975	ILMN_1813975	ADI1
ILMN_2096322	ILMN_2096322	ADIPOR1
ILMN_1688322	ILMN_1688322	ADIPOR1
ILMN_2224833	ILMN_2224833	ADIPOR2
ILMN_2358626	ILMN_2358626	ADK
ILMN_1768062	ILMN_1768062	ADK
ILMN_1801020	ILMN_1801020	ADK
ILMN_1708934	ILMN_1708934	ADM
ILMN_1702933	ILMN_1702933	ADM2
ILMN_1657993	ILMN_1657993	ADNP
ILMN_1666019	ILMN_1666019	ADNP
ILMN_2080751	ILMN_2080751	ADNP2
ILMN_1690352	ILMN_1690352	ADO
ILMN_1747227	ILMN_1747227	ADORA1
ILMN_1807372	ILMN_1807372	ADORA2A
ILMN_1703946	ILMN_1703946	ADORA2B
ILMN_1793959	ILMN_1793959	ADPGK
ILMN_1794512	ILMN_1794512	ADPRH
ILMN_1811480	ILMN_1811480	ADPRHL2
ILMN_1677868	ILMN_1677868	ADRA2B
ILMN_1695590	ILMN_1695590	ADRB2
ILMN_3307926	ILMN_3307926	GRK2
ILMN_2389013	ILMN_2389013	ADRM1
ILMN_1760143	ILMN_1760143	ADRM1
ILMN_1790757	ILMN_1790757	ADSL
ILMN_2092664	ILMN_2092664	ADSS
ILMN_1778796	ILMN_1778796	ADSS
ILMN_1736178	ILMN_1736178	AEBP1
ILMN_1803376	ILMN_1803376	AEBP2
ILMN_3240321	ILMN_3240321	AEN
ILMN_1712944	ILMN_1712944	AES
ILMN_2333107	ILMN_2333107	AES
ILMN_1707958	ILMN_1707958	AES
ILMN_1730995	ILMN_1730995	AFAP1L2
ILMN_2404917	ILMN_2404917	AFAP1L2
ILMN_1673119	ILMN_1673119	AFF1
ILMN_2129015	ILMN_2129015	AFF1
ILMN_1775235	ILMN_1775235	AFF3
ILMN_1708502	ILMN_1708502	AFF4
ILMN_1705447	ILMN_1705447	AFG3L1P
ILMN_1699172	ILMN_1699172	AFG3L1P
ILMN_2066124	ILMN_2066124	AFG3L2
ILMN_2095653	ILMN_2095653	AFMID
ILMN_1707551	ILMN_1707551	AFMID
ILMN_2402766	ILMN_2402766	AFTPH
ILMN_1767722	ILMN_1767722	AFTPH
ILMN_2342841	ILMN_2342841	AFTPH
ILMN_1802631	ILMN_1802631	AGA
ILMN_2269136	ILMN_2269136	AGAP3
ILMN_3239130	ILMN_3239130	AGAP6
ILMN_2308689	ILMN_2308689	AGBL5
ILMN_2290776	ILMN_2290776	AGBL5
ILMN_2257015	ILMN_2257015	AGER
ILMN_3181215	ILMN_3181215	AGFG1
ILMN_3260345	ILMN_3260345	AGFG1
ILMN_1703228	ILMN_1703228	AGFG2
ILMN_2064917	ILMN_2064917	AGGF1
ILMN_1776153	ILMN_1776153	AGGF1
ILMN_1772645	ILMN_1772645	AGK
ILMN_2371825	ILMN_2371825	AGL
ILMN_1664006	ILMN_1664006	AGL
ILMN_1707169	ILMN_1707169	AGMAT
ILMN_1679520	ILMN_1679520	AGPAT1
ILMN_1732176	ILMN_1732176	AGPAT2
ILMN_1681081	ILMN_1681081	AGPAT2
ILMN_2377430	ILMN_2377430	AGPAT2
ILMN_1661373	ILMN_1661373	AGPAT3
ILMN_1654010	ILMN_1654010	AGPAT3
ILMN_1730504	ILMN_1730504	AGPAT4
ILMN_1662049	ILMN_1662049	AGPAT5
ILMN_1740752	ILMN_1740752	GPAT4
ILMN_1794875	ILMN_1794875	GPAT3
ILMN_1698209	ILMN_1698209	AGPS
ILMN_1770454	ILMN_1770454	AGRN
ILMN_2223922	ILMN_2223922	AGTPBP1
ILMN_1718071	ILMN_1718071	AGTPBP1
ILMN_1802458	ILMN_1802458	AGTRAP
ILMN_2307656	ILMN_2307656	AGTRAP
ILMN_1673529	ILMN_1673529	PHYKPL
ILMN_1686370	ILMN_1686370	PHYKPL
ILMN_1809139	ILMN_1809139	AHCTF1
ILMN_1747504	ILMN_1747504	AHCTF1
ILMN_1657862	ILMN_1657862	AHCY
ILMN_1770412	ILMN_1770412	AHCYL1
ILMN_1712786	ILMN_1712786	AHCYL2
ILMN_1791006	ILMN_1791006	AHI1
ILMN_1714567	ILMN_1714567	AHNAK
ILMN_1812640	ILMN_1812640	AHR
ILMN_2162799	ILMN_2162799	AHR
ILMN_1782679	ILMN_1782679	AHRR
ILMN_1703617	ILMN_1703617	AHSA1
ILMN_1798308	ILMN_1798308	AHSA2P
ILMN_2164164	ILMN_2164164	AICDA
ILMN_3240117	ILMN_3240117	AIDA
ILMN_1703538	ILMN_1703538	AIF1
ILMN_1792473	ILMN_1792473	AIF1
ILMN_3246401	ILMN_3246401	AIF1L
ILMN_2313821	ILMN_2313821	AIFM1
ILMN_1717357	ILMN_1717357	AIFM1
ILMN_1668408	ILMN_1668408	AIFM1
ILMN_1667183	ILMN_1667183	AIFM1
ILMN_1712639	ILMN_1712639	AIFM2
ILMN_1797974	ILMN_1797974	AIG1
ILMN_1688625	ILMN_1688625	CRYBG1
ILMN_2214232	ILMN_2214232	AIM2
ILMN_1681301	ILMN_1681301	AIM2
ILMN_1673252	ILMN_1673252	AIMP2
ILMN_2103841	ILMN_2103841	AIP
ILMN_2261519	ILMN_2261519	AIRE
ILMN_1779965	ILMN_1779965	AK1
ILMN_1670542	ILMN_1670542	AK2
ILMN_1655645	ILMN_1655645	AK2
ILMN_1716053	ILMN_1716053	AK2
ILMN_1778173	ILMN_1778173	AK3
ILMN_2338038	ILMN_2338038	AK4
ILMN_1764090	ILMN_1764090	AK4
ILMN_1798249	ILMN_1798249	AK4
ILMN_1712530	ILMN_1712530	AKAP1
ILMN_1718808	ILMN_1718808	AKAP10
ILMN_1783818	ILMN_1783818	AKAP11
ILMN_2293758	ILMN_2293758	AKAP11
ILMN_1735539	ILMN_1735539	AKAP11
ILMN_2280189	ILMN_2280189	AKAP11
ILMN_1693220	ILMN_1693220	AKAP11
ILMN_1709101	ILMN_1709101	AKAP13
ILMN_1752247	ILMN_1752247	AKAP13
ILMN_2396956	ILMN_2396956	AKAP13
ILMN_1675507	ILMN_1675507	AKAP2
ILMN_1733690	ILMN_1733690	AKAP7
ILMN_1741572	ILMN_1741572	AKAP8
ILMN_1768962	ILMN_1768962	AKAP8L
ILMN_1802799	ILMN_1802799	AKIRIN1
ILMN_1658337	ILMN_1658337	AKIRIN1
ILMN_2148847	ILMN_2148847	AKIRIN2
ILMN_1770673	ILMN_1770673	AKNA
ILMN_1728047	ILMN_1728047	AKR1A1
ILMN_1774938	ILMN_1774938	AKR1A1
ILMN_2380771	ILMN_2380771	AKR1A1
ILMN_1701731	ILMN_1701731	AKR1B1
ILMN_2157277	ILMN_2157277	AKR1D1
ILMN_1677043	ILMN_1677043	AKR7A2
ILMN_2145396	ILMN_2145396	AKR7A3
ILMN_2388507	ILMN_2388507	AKT1
ILMN_2410909	ILMN_2410909	AKT1
ILMN_1726906	ILMN_1726906	AKT1S1
ILMN_2325610	ILMN_2325610	AKT3
ILMN_2377240	ILMN_2377240	AKTIP
ILMN_1665982	ILMN_1665982	AKTIP
ILMN_2404657	ILMN_2404657	ALAD
ILMN_1747577	ILMN_1747577	ALAD
ILMN_1700047	ILMN_1700047	ALAS1
ILMN_2385647	ILMN_2385647	ALAS1
ILMN_1782939	ILMN_1782939	ALB
ILMN_1670870	ILMN_1670870	ALCAM
ILMN_2051381	ILMN_2051381	ALDH16A1
ILMN_2302716	ILMN_2302716	ALDH18A1
ILMN_2150894	ILMN_2150894	ALDH1B1
ILMN_1675398	ILMN_1675398	ALDH1B1
ILMN_2182980	ILMN_2182980	ALDH1L2
ILMN_1793859	ILMN_1793859	ALDH2
ILMN_1667564	ILMN_1667564	ALDH3A2
ILMN_1794825	ILMN_1794825	ALDH3A2
ILMN_2401641	ILMN_2401641	ALDH3A2
ILMN_1763666	ILMN_1763666	ALDH3B2
ILMN_1656368	ILMN_1656368	ALDH4A1
ILMN_1696099	ILMN_1696099	ALDH4A1
ILMN_2406557	ILMN_2406557	ALDH4A1
ILMN_2372403	ILMN_2372403	ALDH5A1
ILMN_2372398	ILMN_2372398	ALDH5A1
ILMN_1785284	ILMN_1785284	ALDH6A1
ILMN_2096985	ILMN_2096985	ALDH6A1
ILMN_1687508	ILMN_1687508	ALDH7A1
ILMN_1763461	ILMN_1763461	ALDH7A1
ILMN_2365176	ILMN_2365176	ALDH8A1
ILMN_1761804	ILMN_1761804	ALDH9A1
ILMN_1736700	ILMN_1736700	ALDOA
ILMN_2251253	ILMN_2251253	ALDOA
ILMN_1741148	ILMN_1741148	ALDOA
ILMN_1747716	ILMN_1747716	ALDOB
ILMN_1755974	ILMN_1755974	ALDOC
ILMN_1718093	ILMN_1718093	ALG1
ILMN_3243268	ILMN_3243268	ALG10
ILMN_1730304	ILMN_1730304	ALG10B
ILMN_1666325	ILMN_1666325	ALG10B
ILMN_3251482	ILMN_3251482	ALG10B
ILMN_1660856	ILMN_1660856	ALG11
ILMN_2120982	ILMN_2120982	ALG11
ILMN_1743995	ILMN_1743995	ALG12
ILMN_2147503	ILMN_2147503	ALG13
ILMN_1761456	ILMN_1761456	ALG13
ILMN_1743635	ILMN_1743635	ALG14
ILMN_2191822	ILMN_2191822	ALG14
ILMN_1737945	ILMN_1737945	ALG2
ILMN_1722688	ILMN_1722688	ALG2
ILMN_1806845	ILMN_1806845	ALG3
ILMN_1711886	ILMN_1711886	ALG3
ILMN_1664449	ILMN_1664449	ALG5
ILMN_1771411	ILMN_1771411	ALG6
ILMN_2365686	ILMN_2365686	ALG8
ILMN_1685413	ILMN_1685413	ALG8
ILMN_1732809	ILMN_1732809	ALG9
ILMN_1758038	ILMN_1758038	ALKBH1
ILMN_2375973	ILMN_2375973	ALKBH1
ILMN_1690252	ILMN_1690252	ALKBH2
ILMN_2134062	ILMN_2134062	ALKBH3
ILMN_1805673	ILMN_1805673	ALKBH4
ILMN_1657283	ILMN_1657283	ALKBH5
ILMN_1808792	ILMN_1808792	ALKBH6
ILMN_1761764	ILMN_1761764	ALKBH7
ILMN_1779190	ILMN_1779190	ALKBH8
ILMN_1709474	ILMN_1709474	ALMS1
ILMN_2393149	ILMN_2393149	ALOX15B
ILMN_1797875	ILMN_1797875	ALOX5AP
ILMN_2078697	ILMN_2078697	ALPK1
ILMN_1811238	ILMN_1811238	ALPK2
ILMN_1701603	ILMN_1701603	ALPL
ILMN_1693789	ILMN_1693789	ALPP
ILMN_1750256	ILMN_1750256	ALS2
ILMN_1787314	ILMN_1787314	ICA1L
ILMN_1800958	ILMN_1800958	TMEM237
ILMN_1760889	ILMN_1760889	CARF
ILMN_3236443	ILMN_3236443	ALX1
ILMN_3246673	ILMN_3246673	SLC35G6
ILMN_1759670	ILMN_1759670	AMACR
ILMN_2367172	ILMN_2367172	AMACR
ILMN_1792741	ILMN_1792741	AMACR
ILMN_1662681	ILMN_1662681	AMBRA1
ILMN_1788462	ILMN_1788462	AMD1
ILMN_1667994	ILMN_1667994	AMD1
ILMN_1695759	ILMN_1695759	AMDHD2
ILMN_1723116	ILMN_1723116	AMFR
ILMN_1666258	ILMN_1666258	AMFR
ILMN_1778723	ILMN_1778723	JAML
ILMN_1779374	ILMN_1779374	AMMECR1
ILMN_2394242	ILMN_2394242	AMMECR1
ILMN_1727023	ILMN_1727023	AMMECR1L
ILMN_1792409	ILMN_1792409	AMOT
ILMN_1778788	ILMN_1778788	AMOTL2
ILMN_1774447	ILMN_1774447	AMPD3
ILMN_1665331	ILMN_1665331	AMT
ILMN_2294762	ILMN_2294762	AMY1A
ILMN_1726327	ILMN_1726327	AMY1B
ILMN_1663313	ILMN_1663313	AMY1C
ILMN_1801303	ILMN_1801303	AMY2A
ILMN_1694882	ILMN_1694882	AMY2B
ILMN_2073157	ILMN_2073157	AMY2B
ILMN_2309549	ILMN_2309549	AMZ2
ILMN_1801606	ILMN_1801606	AMZ2
ILMN_1804812	ILMN_1804812	ANAPC1
ILMN_1659553	ILMN_1659553	ANAPC1
ILMN_1770378	ILMN_1770378	ANAPC10
ILMN_2343563	ILMN_2343563	ANAPC11
ILMN_1722102	ILMN_1722102	ANAPC11
ILMN_1793894	ILMN_1793894	ANAPC13
ILMN_1802973	ILMN_1802973	ANAPC4
ILMN_1723177	ILMN_1723177	ANAPC5
ILMN_2199284	ILMN_2199284	ANAPC7
ILMN_1696974	ILMN_1696974	ANG
ILMN_1760727	ILMN_1760727	ANG
ILMN_1665871	ILMN_1665871	ANGEL1
ILMN_1736340	ILMN_1736340	ANGEL2
ILMN_2386444	ILMN_2386444	ANGPTL4
ILMN_1707727	ILMN_1707727	ANGPTL4
ILMN_1725518	ILMN_1725518	ANGPTL6
ILMN_1684694	ILMN_1684694	ANK1
ILMN_2112829	ILMN_2112829	ANKAR
ILMN_1813139	ILMN_1813139	ANKDD1A
ILMN_1794470	ILMN_1794470	ANKFY1
ILMN_1801464	ILMN_1801464	ANKFY1
ILMN_1735364	ILMN_1735364	ANKFY1
ILMN_1765091	ILMN_1765091	ANKHD1
ILMN_2341382	ILMN_2341382	ANKHD1
ILMN_1766560	ILMN_1766560	ANKHD1-EIF4EBP3
ILMN_3241218	ILMN_3241218	ANKIB1
ILMN_3243457	ILMN_3243457	ANKLE1
ILMN_3249608	ILMN_3249608	ANKLE2
ILMN_1675483	ILMN_1675483	ANKMY1
ILMN_1687351	ILMN_1687351	ANKRA2
ILMN_2185563	ILMN_2185563	ANKRA2
ILMN_1711828	ILMN_1711828	ANKRD10
ILMN_2115218	ILMN_2115218	ANKRD10
ILMN_2108709	ILMN_2108709	ANKRD11
ILMN_1661833	ILMN_1661833	ANKRD12
ILMN_1689908	ILMN_1689908	ANKRD13A
ILMN_2148507	ILMN_2148507	ANKRD13C
ILMN_1675435	ILMN_1675435	ANKRD16
ILMN_1659156	ILMN_1659156	ANKRD16
ILMN_2353431	ILMN_2353431	ANKRD16
ILMN_1787064	ILMN_1787064	ANKRD17
ILMN_2406335	ILMN_2406335	ANKRD17
ILMN_1712019	ILMN_1712019	ANKRD17
ILMN_2215824	ILMN_2215824	ANKRD20A1
ILMN_1670452	ILMN_1670452	ANKRD20A1
ILMN_1799848	ILMN_1799848	ANKRD22
ILMN_2132599	ILMN_2132599	ANKRD22
ILMN_2227338	ILMN_2227338	ANKRD23
ILMN_1768202	ILMN_1768202	ANKRD24
ILMN_1740161	ILMN_1740161	ANKRD26
ILMN_1794063	ILMN_1794063	ANKRD27
ILMN_1697594	ILMN_1697594	ANKRD28
ILMN_2232520	ILMN_2232520	ANKRD28
ILMN_2075643	ILMN_2075643	ANKRD29
ILMN_1749338	ILMN_1749338	ANKRD29
ILMN_1730678	ILMN_1730678	ANKRD30B
ILMN_2214278	ILMN_2214278	SLF1
ILMN_1805985	ILMN_1805985	SLF1
ILMN_1667748	ILMN_1667748	ANKRD33
ILMN_2119793	ILMN_2119793	ANKRD34A
ILMN_2145153	ILMN_2145153	ANKRD35
ILMN_2382431	ILMN_2382431	ANKRD36
ILMN_2280568	ILMN_2280568	ANKRD36
ILMN_1780806	ILMN_1780806	ANKRD36B
ILMN_2189614	ILMN_2189614	ANKRD36B
ILMN_1756417	ILMN_1756417	ANKRD37
ILMN_1710979	ILMN_1710979	ANKRD39
ILMN_1758846	ILMN_1758846	ANKRD40
ILMN_1751744	ILMN_1751744	ANKLE1
ILMN_2091590	ILMN_2091590	ANKLE1
ILMN_2059844	ILMN_2059844	ANKRD44
ILMN_1712298	ILMN_1712298	ANKRD46
ILMN_1669259	ILMN_1669259	ANKRD49
ILMN_2226304	ILMN_2226304	ANKRD50
ILMN_3244029	ILMN_3244029	ANKRD52
ILMN_1766309	ILMN_1766309	ANKRD54
ILMN_1724040	ILMN_1724040	SOWAHC
ILMN_2178587	ILMN_2178587	ANKRD6
ILMN_2048607	ILMN_2048607	ANKRD9
ILMN_1813669	ILMN_1813669	ANKS1A
ILMN_1751636	ILMN_1751636	ANKS3
ILMN_1677487	ILMN_1677487	ANKZF1
ILMN_2370692	ILMN_2370692	ANKZF1
ILMN_1739645	ILMN_1739645	ANLN
ILMN_1767111	ILMN_1767111	ANO10
ILMN_3240765	ILMN_3240765	ANO3
ILMN_1674941	ILMN_1674941	ANO6
ILMN_1709124	ILMN_1709124	ANO8
ILMN_1762629	ILMN_1762629	ANO9
ILMN_1769259	ILMN_1769259	ANO9
ILMN_1798679	ILMN_1798679	ANO9
ILMN_1807945	ILMN_1807945	ANP32A
ILMN_1684293	ILMN_1684293	ANP32B
ILMN_1655868	ILMN_1655868	ANP32C
ILMN_1812926	ILMN_1812926	ANTXR2
ILMN_1668566	ILMN_1668566	ZFAND4
ILMN_2184184	ILMN_2184184	ANXA1
ILMN_2380494	ILMN_2380494	ANXA11
ILMN_1685170	ILMN_1685170	ANXA11
ILMN_1807003	ILMN_1807003	ANXA11
ILMN_1711899	ILMN_1711899	ANXA2
ILMN_1755937	ILMN_1755937	ANXA2
ILMN_2409167	ILMN_2409167	ANXA2
ILMN_1698100	ILMN_1698100	ANXA2P1
ILMN_2041101	ILMN_2041101	ANXA2P1
ILMN_3235632	ILMN_3235632	ANXA2P2
ILMN_1694548	ILMN_1694548	ANXA3
ILMN_1711408	ILMN_1711408	ANXA4
ILMN_1741003	ILMN_1741003	ANXA5
ILMN_2326591	ILMN_2326591	ANXA6
ILMN_1678612	ILMN_1678612	ANXA6
ILMN_1703791	ILMN_1703791	ANXA7
ILMN_1813840	ILMN_1813840	KDM1A
ILMN_2387505	ILMN_2387505	AP1B1
ILMN_1781983	ILMN_1781983	AP1B1
ILMN_2399627	ILMN_2399627	AP1G1
ILMN_2399622	ILMN_2399622	AP1G1
ILMN_1754179	ILMN_1754179	AP1G2
ILMN_1805247	ILMN_1805247	SYNRG
ILMN_2415467	ILMN_2415467	SYNRG
ILMN_1754738	ILMN_1754738	AP1M1
ILMN_1751345	ILMN_1751345	AP1S1
ILMN_1712806	ILMN_1712806	AP1S1
ILMN_2316173	ILMN_2316173	AP1S1
ILMN_1766411	ILMN_1766411	AP1S2
ILMN_2120273	ILMN_2120273	AP1S2
ILMN_1768610	ILMN_1768610	AP1S3
ILMN_1815306	ILMN_1815306	AP2A1
ILMN_2359211	ILMN_2359211	AP2A1
ILMN_1803779	ILMN_1803779	AP2A2
ILMN_1681998	ILMN_1681998	AP2B1
ILMN_2331735	ILMN_2331735	AP2B1
ILMN_1699598	ILMN_1699598	AP2M1
ILMN_2402798	ILMN_2402798	AP2M1
ILMN_1662426	ILMN_1662426	AP2S1
ILMN_1809957	ILMN_1809957	AP2S1
ILMN_1768867	ILMN_1768867	AP3B1
ILMN_1764945	ILMN_1764945	AP3D1
ILMN_2390114	ILMN_2390114	AP3D1
ILMN_2362122	ILMN_2362122	AP3M1
ILMN_1667086	ILMN_1667086	AP3M1
ILMN_1676946	ILMN_1676946	AP3M2
ILMN_2311761	ILMN_2311761	AP3S1
ILMN_1731596	ILMN_1731596	AP3S2
ILMN_1669377	ILMN_1669377	AP4B1
ILMN_1754531	ILMN_1754531	AP4E1
ILMN_1779512	ILMN_1779512	AP4M1
ILMN_1659463	ILMN_1659463	APAF1
ILMN_2344798	ILMN_2344798	APAF1
ILMN_1686610	ILMN_1686610	APBA3
ILMN_1801710	ILMN_1801710	APBB1IP
ILMN_1740772	ILMN_1740772	APBB3
ILMN_2320513	ILMN_2320513	APBB3
ILMN_1718023	ILMN_1718023	APEH
ILMN_2319344	ILMN_2319344	APEX1
ILMN_1661886	ILMN_1661886	APEX1
ILMN_1652505	ILMN_1652505	APEX2
ILMN_1658472	ILMN_1658472	APH1A
ILMN_2398388	ILMN_2398388	APH1A
ILMN_1767816	ILMN_1767816	APH1B
ILMN_1815051	ILMN_1815051	API5
ILMN_1793598	ILMN_1793598	APIP
ILMN_2128293	ILMN_2128293	APIP
ILMN_1710482	ILMN_1710482	APLP2
ILMN_1729533	ILMN_1729533	NAXE
ILMN_2219466	ILMN_2219466	APOBEC3B
ILMN_1675684	ILMN_1675684	APOBEC3C
ILMN_3307651	ILMN_3307651	APOBEC3D
ILMN_2412172	ILMN_2412172	APOBEC3F
ILMN_2296950	ILMN_2296950	APOBEC3F
ILMN_1702706	ILMN_1702706	APOBEC3F
ILMN_1710726	ILMN_1710726	APOBEC3F
ILMN_1802106	ILMN_1802106	APOBEC3G
ILMN_2232478	ILMN_2232478	APOBEC3G
ILMN_1664828	ILMN_1664828	APOBEC3H
ILMN_1789007	ILMN_1789007	APOC1
ILMN_1761793	ILMN_1761793	APOL1
ILMN_2325338	ILMN_2325338	APOL2
ILMN_2325337	ILMN_2325337	APOL2
ILMN_1756862	ILMN_1756862	APOL3
ILMN_1687201	ILMN_1687201	APOL6
ILMN_1723522	ILMN_1723522	APOLD1
ILMN_1731941	ILMN_1731941	APOM
ILMN_1721623	ILMN_1721623	APOO
ILMN_1777483	ILMN_1777483	APOOL
ILMN_2404065	ILMN_2404065	APP
ILMN_2404063	ILMN_2404063	APP
ILMN_1694875	ILMN_1694875	APPBP2
ILMN_2149766	ILMN_2149766	APPBP2
ILMN_1763730	ILMN_1763730	APPL1
ILMN_1765076	ILMN_1765076	APPL2
ILMN_1722491	ILMN_1722491	APRT
ILMN_1726410	ILMN_1726410	APRT
ILMN_2317348	ILMN_2317348	APTX
ILMN_1762606	ILMN_1762606	AQP11
ILMN_3246595	ILMN_3246595	AQP12B
ILMN_3245829	ILMN_3245829	AQP7P1
ILMN_1715068	ILMN_1715068	AQP9
ILMN_2177460	ILMN_2177460	AQR
ILMN_1717154	ILMN_1717154	AQR
ILMN_1658883	ILMN_1658883	ARAF
ILMN_3269719	ILMN_3269719	ARAP1
ILMN_3244434	ILMN_3244434	ARAP2
ILMN_1767541	ILMN_1767541	ARAP2
ILMN_1699703	ILMN_1699703	ARCN1
ILMN_1721977	ILMN_1721977	NAA10
ILMN_2330948	ILMN_2330948	ARF1
ILMN_1802203	ILMN_1802203	ARF1
ILMN_1682938	ILMN_1682938	ARF3
ILMN_1723884	ILMN_1723884	ARF4
ILMN_1719518	ILMN_1719518	ARF4
ILMN_1752340	ILMN_1752340	ARF5
ILMN_1764297	ILMN_1764297	ARF6
ILMN_2406873	ILMN_2406873	ARFGAP1
ILMN_1675709	ILMN_1675709	ARFGAP1
ILMN_1769250	ILMN_1769250	ARFGAP2
ILMN_1731287	ILMN_1731287	ARFGAP3
ILMN_2221408	ILMN_2221408	ARFGEF1
ILMN_1728471	ILMN_1728471	ARFGEF1
ILMN_1789990	ILMN_1789990	ARFGEF2
ILMN_2403906	ILMN_2403906	ARFIP1
ILMN_1750690	ILMN_1750690	ARFIP2
ILMN_1800898	ILMN_1800898	ARG2
ILMN_1788468	ILMN_1788468	ARGLU1
ILMN_1732060	ILMN_1732060	ARHGAP1
ILMN_1736112	ILMN_1736112	ARHGAP10
ILMN_1744830	ILMN_1744830	ARHGAP11A
ILMN_2215881	ILMN_2215881	ARHGAP11B
ILMN_2101810	ILMN_2101810	ARHGAP12
ILMN_1753500	ILMN_1753500	ARHGAP12
ILMN_2208413	ILMN_2208413	ARHGAP15
ILMN_1718610	ILMN_1718610	ARHGAP17
ILMN_2398847	ILMN_2398847	ARHGAP17
ILMN_1791186	ILMN_1791186	ARHGAP18
ILMN_1688953	ILMN_1688953	ARHGAP19
ILMN_1811592	ILMN_1811592	ARHGAP21
ILMN_2352633	ILMN_2352633	ARHGAP24
ILMN_1765876	ILMN_1765876	ARHGAP24
ILMN_1801833	ILMN_1801833	ARHGAP24
ILMN_1777998	ILMN_1777998	ARHGAP25
ILMN_2103362	ILMN_2103362	ARHGAP27
ILMN_1750805	ILMN_1750805	ARHGAP30
ILMN_2408851	ILMN_2408851	ARHGAP30
ILMN_1751164	ILMN_1751164	ARHGAP30
ILMN_1770824	ILMN_1770824	ARHGAP4
ILMN_1663916	ILMN_1663916	ARHGAP9
ILMN_2382657	ILMN_2382657	ARHGAP9
ILMN_1734742	ILMN_1734742	ARHGDIA
ILMN_1678143	ILMN_1678143	ARHGDIB
ILMN_1772370	ILMN_1772370	ARHGEF1
ILMN_2405129	ILMN_2405129	ARHGEF1
ILMN_1689770	ILMN_1689770	ARHGEF10L
ILMN_1733861	ILMN_1733861	ARHGEF11
ILMN_1810712	ILMN_1810712	ARHGEF12
ILMN_1754562	ILMN_1754562	ARHGEF17
ILMN_1664016	ILMN_1664016	ARHGEF18
ILMN_1808999	ILMN_1808999	ARHGEF19
ILMN_1703477	ILMN_1703477	ARHGEF2
ILMN_1781010	ILMN_1781010	ARHGEF3
ILMN_1708093	ILMN_1708093	ARHGEF5
ILMN_2214473	ILMN_2214473	ARHGEF35
ILMN_1803423	ILMN_1803423	ARHGEF6
ILMN_1796912	ILMN_1796912	ARHGEF7
ILMN_1675984	ILMN_1675984	ARHGEF7
ILMN_1779370	ILMN_1779370	ARHGEF9
ILMN_1797341	ILMN_1797341	ARID1A
ILMN_1795247	ILMN_1795247	ARID2
ILMN_2182335	ILMN_2182335	ARID2
ILMN_1670130	ILMN_1670130	ARID3A
ILMN_1696956	ILMN_1696956	ARID3B
ILMN_2338447	ILMN_2338447	ARID4A
ILMN_1676626	ILMN_1676626	ARID4A
ILMN_1810229	ILMN_1810229	ARID4A
ILMN_2269564	ILMN_2269564	ARID4B
ILMN_1761334	ILMN_1761334	ARID4B
ILMN_2362982	ILMN_2362982	ARID4B
ILMN_1689700	ILMN_1689700	ARID5A
ILMN_2298567	ILMN_2298567	ARID5A
ILMN_2415157	ILMN_2415157	ARID5A
ILMN_1721626	ILMN_1721626	ARID5B
ILMN_1694219	ILMN_1694219	ARIH1
ILMN_1792825	ILMN_1792825	ARIH2
ILMN_1813091	ILMN_1813091	ARL1
ILMN_2403047	ILMN_2403047	ARL13B
ILMN_1774161	ILMN_1774161	ARL15
ILMN_2202967	ILMN_2202967	ARL15
ILMN_2188119	ILMN_2188119	ARL16
ILMN_1679917	ILMN_1679917	ARL16
ILMN_3231952	ILMN_3231952	ARL17B
ILMN_3231502	ILMN_3231502	ARL17B
ILMN_1698680	ILMN_1698680	ARL17A
ILMN_1787879	ILMN_1787879	ARL2
ILMN_1755391	ILMN_1755391	ARL2BP
ILMN_1743241	ILMN_1743241	ARL4A
ILMN_1768391	ILMN_1768391	ARL4C
ILMN_1771738	ILMN_1771738	ARL5A
ILMN_2332558	ILMN_2332558	ARL5A
ILMN_1688526	ILMN_1688526	ARL5A
ILMN_2120022	ILMN_2120022	ARL5B
ILMN_1680465	ILMN_1680465	ARL5B
ILMN_2307266	ILMN_2307266	ARL6
ILMN_1771822	ILMN_1771822	ARL6
ILMN_1708416	ILMN_1708416	ARL6IP1
ILMN_2113362	ILMN_2113362	ARL6IP1
ILMN_1791149	ILMN_1791149	ARL6IP4
ILMN_2393144	ILMN_2393144	ARL6IP4
ILMN_1769810	ILMN_1769810	ARL6IP5
ILMN_1797964	ILMN_1797964	ARL6IP6
ILMN_1752837	ILMN_1752837	ARL8B
ILMN_1722066	ILMN_1722066	ARMC1
ILMN_1689296	ILMN_1689296	ARMC10
ILMN_2052598	ILMN_2052598	ARMC10
ILMN_1697088	ILMN_1697088	ARMC5
ILMN_1697118	ILMN_1697118	ARMC6
ILMN_1797298	ILMN_1797298	ARMC7
ILMN_1797453	ILMN_1797453	ARMC8
ILMN_1781151	ILMN_1781151	ARMC8
ILMN_2385318	ILMN_2385318	ARMC8
ILMN_1755732	ILMN_1755732	ARMC9
ILMN_2180677	ILMN_2180677	ARMCX1
ILMN_1788192	ILMN_1788192	ARMCX1
ILMN_1785170	ILMN_1785170	ARMCX2
ILMN_2334760	ILMN_2334760	ARMCX3
ILMN_2334765	ILMN_2334765	ARMCX3
ILMN_1741156	ILMN_1741156	ARMCX5
ILMN_2414533	ILMN_2414533	ARMCX6
ILMN_1768226	ILMN_1768226	ARMCX6
ILMN_1716026	ILMN_1716026	ARMCX6
ILMN_2183510	ILMN_2183510	MANF
ILMN_2347314	ILMN_2347314	ARNT
ILMN_1762582	ILMN_1762582	ARNT
ILMN_2405305	ILMN_2405305	ARNTL
ILMN_1798064	ILMN_1798064	ARNTL2
ILMN_1759915	ILMN_1759915	ARPC1A
ILMN_2085760	ILMN_2085760	ARPC1B
ILMN_1792489	ILMN_1792489	ARPC2
ILMN_1655561	ILMN_1655561	ARPC3
ILMN_2393763	ILMN_2393763	ARPC4
ILMN_1707336	ILMN_1707336	ARPC4
ILMN_1768394	ILMN_1768394	ARPC5
ILMN_2043816	ILMN_2043816	ARPC5L
ILMN_1772798	ILMN_1772798	ARPP19
ILMN_2059505	ILMN_2059505	ARPP19
ILMN_2325168	ILMN_2325168	ARRB1
ILMN_1730620	ILMN_1730620	ARRB1
ILMN_2395711	ILMN_2395711	ARRB2
ILMN_1715181	ILMN_1715181	ARRDC2
ILMN_1655612	ILMN_1655612	ARRDC2
ILMN_2198515	ILMN_2198515	ARRDC3
ILMN_2153787	ILMN_2153787	ARRDC5
ILMN_2358202	ILMN_2358202	SRRT
ILMN_2047240	ILMN_2047240	ARSA
ILMN_1656477	ILMN_1656477	ARSA
ILMN_2242937	ILMN_2242937	ARSB
ILMN_1722045	ILMN_1722045	ARSB
ILMN_1712587	ILMN_1712587	ARSB
ILMN_1684873	ILMN_1684873	ARSD
ILMN_1720604	ILMN_1720604	ARSG
ILMN_1657050	ILMN_1657050	ARSK
ILMN_1807913	ILMN_1807913	ART1
ILMN_1800935	ILMN_1800935	ARV1
ILMN_1771732	ILMN_1771732	AS3MT
ILMN_1684054	ILMN_1684054	ASAH1
ILMN_2233366	ILMN_2233366	ASAP1
ILMN_3245057	ILMN_3245057	ASAP1
ILMN_1690963	ILMN_1690963	ASAP1
ILMN_1683096	ILMN_1683096	ASB1
ILMN_1810881	ILMN_1810881	ASB16
ILMN_1795811	ILMN_1795811	ASB2
ILMN_2358784	ILMN_2358784	ASB3
ILMN_2358783	ILMN_2358783	ASB3
ILMN_1699606	ILMN_1699606	ASB3
ILMN_1806705	ILMN_1806705	ASB6
ILMN_2397776	ILMN_2397776	ASB6
ILMN_1744050	ILMN_1744050	ASB7
ILMN_1680419	ILMN_1680419	ASB7
ILMN_2173740	ILMN_2173740	ASB8
ILMN_1783675	ILMN_1783675	ASB8
ILMN_2373728	ILMN_2373728	ASB9
ILMN_1786041	ILMN_1786041	ASB9
ILMN_1685097	ILMN_1685097	ASCC1
ILMN_1679919	ILMN_1679919	ASCC2
ILMN_1745772	ILMN_1745772	ASCC3
ILMN_2294751	ILMN_2294751	ASCC3
ILMN_1797656	ILMN_1797656	ASCC3
ILMN_1701653	ILMN_1701653	ASCL1
ILMN_1714737	ILMN_1714737	ASF1A
ILMN_1695414	ILMN_1695414	ASF1B
ILMN_1666933	ILMN_1666933	ASH2L
ILMN_1685037	ILMN_1685037	ASL
ILMN_2379393	ILMN_2379393	ASL
ILMN_1690595	ILMN_1690595	ASMT
ILMN_1804384	ILMN_1804384	ASMTL
ILMN_1689786	ILMN_1689786	ASMTL
ILMN_1657571	ILMN_1657571	ASNA1
ILMN_1796417	ILMN_1796417	ASNS
ILMN_2398107	ILMN_2398107	ASNS
ILMN_2221673	ILMN_2221673	ASNSD1
ILMN_1693771	ILMN_1693771	ASPH
ILMN_1708950	ILMN_1708950	ASPHD1
ILMN_2167426	ILMN_2167426	ASPHD2
ILMN_1815184	ILMN_1815184	ASPM
ILMN_1660749	ILMN_1660749	ASPSCR1
ILMN_1810199	ILMN_1810199	ASRGL1
ILMN_1708778	ILMN_1708778	ASS1
ILMN_2395451	ILMN_2395451	ASS1
ILMN_1803813	ILMN_1803813	ASTE1
ILMN_1744118	ILMN_1744118	ASTN2
ILMN_1797283	ILMN_1797283	ASTN2
ILMN_2381559	ILMN_2381559	ASTN2
ILMN_1726025	ILMN_1726025	ASXL1
ILMN_1698968	ILMN_1698968	ASXL2
ILMN_1654497	ILMN_1654497	ATAD1
ILMN_2169983	ILMN_2169983	ATAD1
ILMN_2048700	ILMN_2048700	ATAD2
ILMN_3235282	ILMN_3235282	ATAD2B
ILMN_1738530	ILMN_1738530	ATAD3A
ILMN_2131936	ILMN_2131936	ATAD3B
ILMN_1812479	ILMN_1812479	ATE1
ILMN_1756867	ILMN_1756867	ATE1
ILMN_1801923	ILMN_1801923	ATF1
ILMN_1748271	ILMN_1748271	ATF2
ILMN_2374865	ILMN_2374865	ATF3
ILMN_1672128	ILMN_1672128	ATF4
ILMN_1783394	ILMN_1783394	ATF4
ILMN_2358457	ILMN_2358457	ATF4
ILMN_1669113	ILMN_1669113	ATF5
ILMN_1703471	ILMN_1703471	ATF6
ILMN_3273641	ILMN_3273641	ATF6B
ILMN_3194911	ILMN_3194911	ATF6B
ILMN_1804445	ILMN_1804445	ATF7IP2
ILMN_1748968	ILMN_1748968	ATG10
ILMN_2206098	ILMN_2206098	ATG10
ILMN_2188204	ILMN_2188204	ATG12
ILMN_1673898	ILMN_1673898	ATG12
ILMN_1725707	ILMN_1725707	ATG16L1
ILMN_2365881	ILMN_2365881	ATG16L1
ILMN_1664644	ILMN_1664644	ATG16L2
ILMN_1756006	ILMN_1756006	ATG2A
ILMN_1735006	ILMN_1735006	ATG2B
ILMN_1769566	ILMN_1769566	ATG3
ILMN_2163732	ILMN_2163732	ATG3
ILMN_2313782	ILMN_2313782	ATG4A
ILMN_3307158	ILMN_3307158	ATG4A
ILMN_2411915	ILMN_2411915	ATG4B
ILMN_1700923	ILMN_1700923	ATG4C
ILMN_2180315	ILMN_2180315	ATG4D
ILMN_1801905	ILMN_1801905	ATG4D
ILMN_1718265	ILMN_1718265	ATG5
ILMN_1790978	ILMN_1790978	ATG7
ILMN_2410975	ILMN_2410975	ATG9A
ILMN_1739008	ILMN_1739008	ATG9A
ILMN_1794707	ILMN_1794707	PGGHG
ILMN_1673991	ILMN_1673991	ATIC
ILMN_3255124	ILMN_3255124	ATL1
ILMN_1716384	ILMN_1716384	ATL2
ILMN_1751086	ILMN_1751086	ATL3
ILMN_2370825	ILMN_2370825	ATM
ILMN_1779214	ILMN_1779214	ATM
ILMN_1772540	ILMN_1772540	ATMIN
ILMN_2223720	ILMN_2223720	ATMIN
ILMN_1737833	ILMN_1737833	ATN1
ILMN_1752393	ILMN_1752393	ATOH7
ILMN_1670609	ILMN_1670609	ATOX1
ILMN_3307935	ILMN_3307935	ATP10A
ILMN_1658884	ILMN_1658884	ATP11B
ILMN_2124155	ILMN_2124155	ATP11B
ILMN_1661428	ILMN_1661428	ATP11C
ILMN_1804137	ILMN_1804137	ATP11C
ILMN_2389810	ILMN_2389810	ATP11C
ILMN_2134224	ILMN_2134224	ATP13A1
ILMN_1704164	ILMN_1704164	ATP13A2
ILMN_1731783	ILMN_1731783	ATP1A1
ILMN_2415189	ILMN_2415189	ATP1A1
ILMN_1775566	ILMN_1775566	ATP1A1
ILMN_1689098	ILMN_1689098	ATP1A3
ILMN_1658071	ILMN_1658071	ATP1B1
ILMN_2407824	ILMN_2407824	ATP1B1
ILMN_1730291	ILMN_1730291	ATP1B1
ILMN_1654322	ILMN_1654322	ATP1B3
ILMN_1674460	ILMN_1674460	ATP2A1
ILMN_1655884	ILMN_1655884	ATP2A2
ILMN_1687375	ILMN_1687375	ATP2A2
ILMN_1815666	ILMN_1815666	ATP2A2
ILMN_1697827	ILMN_1697827	ATP2A3
ILMN_2310909	ILMN_2310909	ATP2A3
ILMN_2401933	ILMN_2401933	ATP2B1
ILMN_1813399	ILMN_1813399	ATP2B1
ILMN_1680579	ILMN_1680579	ATP2B4
ILMN_2367753	ILMN_2367753	ATP2B4
ILMN_1696568	ILMN_1696568	ATP2C1
ILMN_1758784	ILMN_1758784	ATP2C1
ILMN_2340565	ILMN_2340565	ATP2C1
ILMN_2209417	ILMN_2209417	ATP4A
ILMN_2341363	ILMN_2341363	ATP5F1A
ILMN_1764494	ILMN_1764494	ATP5F1A
ILMN_1772132	ILMN_1772132	ATP5F1B
ILMN_1701269	ILMN_1701269	ATP5F1C
ILMN_1679178	ILMN_1679178	ATP5F1D
ILMN_1653599	ILMN_1653599	ATP5F1D
ILMN_1756674	ILMN_1756674	ATP5F1EP2
ILMN_2225887	ILMN_2225887	ATP5F1EP2
ILMN_1672191	ILMN_1672191	ATP5PB
ILMN_1721989	ILMN_1721989	ATP5PB
ILMN_1712430	ILMN_1712430	ATP5MC1
ILMN_1676393	ILMN_1676393	ATP5MC1
ILMN_1669102	ILMN_1669102	ATP5MC2
ILMN_1660577	ILMN_1660577	ATP5MC2
ILMN_1770466	ILMN_1770466	ATP5MC3
ILMN_1794912	ILMN_1794912	ATP5PD
ILMN_1666372	ILMN_1666372	ATP5PD
ILMN_1726603	ILMN_1726603	ATP5ME
ILMN_1772506	ILMN_1772506	ATP5ME
ILMN_1652806	ILMN_1652806	ATP5PF
ILMN_1772929	ILMN_1772929	ATP5PF
ILMN_2348093	ILMN_2348093	ATP5PF
ILMN_2307883	ILMN_2307883	ATP5MF
ILMN_2310621	ILMN_2310621	ATP5MF
ILMN_2079285	ILMN_2079285	ATP5MG
ILMN_1812638	ILMN_1812638	ATP5MG
ILMN_1791332	ILMN_1791332	ATP5PO
ILMN_1700625	ILMN_1700625	ATP5S
ILMN_1679188	ILMN_1679188	ATP5S
ILMN_2299843	ILMN_2299843	ATP5S
ILMN_1809027	ILMN_1809027	DMAC2
ILMN_1697694	ILMN_1697694	ATP6AP1
ILMN_1755990	ILMN_1755990	ATP6AP1L
ILMN_1677440	ILMN_1677440	ATP6AP2
ILMN_1752579	ILMN_1752579	ATP6V0A1
ILMN_1700380	ILMN_1700380	ATP6V0A2
ILMN_1721391	ILMN_1721391	ATP6V0B
ILMN_2353642	ILMN_2353642	ATP6V0B
ILMN_1795826	ILMN_1795826	ATP6V0D1
ILMN_1715635	ILMN_1715635	ATP6V0E1
ILMN_2071937	ILMN_2071937	ATP6V0E1
ILMN_1785095	ILMN_1785095	ATP6V0E2
ILMN_1711516	ILMN_1711516	ATP6V1A
ILMN_1787705	ILMN_1787705	ATP6V1B2
ILMN_1659801	ILMN_1659801	ATP6V1C1
ILMN_1797310	ILMN_1797310	ATP6V1D
ILMN_2339779	ILMN_2339779	ATP6V1E1
ILMN_1798485	ILMN_1798485	ATP6V1E1
ILMN_1810235	ILMN_1810235	ATP6V1E2
ILMN_2099783	ILMN_2099783	ATP6V1F
ILMN_1784523	ILMN_1784523	ATP6V1G1
ILMN_1654541	ILMN_1654541	ATP6V1G2
ILMN_1689473	ILMN_1689473	ATP6V1H
ILMN_2403730	ILMN_2403730	ATP6V1H
ILMN_1808115	ILMN_1808115	ATP7A
ILMN_1778358	ILMN_1778358	ATP8A1
ILMN_1782057	ILMN_1782057	ATP8B2
ILMN_1783956	ILMN_1783956	ATP8B4
ILMN_2089073	ILMN_2089073	ATP9A
ILMN_1658684	ILMN_1658684	ATP9B
ILMN_1790603	ILMN_1790603	ATPAF1
ILMN_2395055	ILMN_2395055	ATPAF1
ILMN_1727390	ILMN_1727390	ATPAF2
ILMN_1721741	ILMN_1721741	GPN2
ILMN_1682375	ILMN_1682375	CTU1
ILMN_2140207	ILMN_2140207	DPH6
ILMN_1782085	ILMN_1782085	DPH6
ILMN_1727332	ILMN_1727332	ATP5IF1
ILMN_1685978	ILMN_1685978	ATP5IF1
ILMN_2370464	ILMN_2370464	ATRIP
ILMN_1653896	ILMN_1653896	ATRIP
ILMN_2355586	ILMN_2355586	ATRN
ILMN_1761850	ILMN_1761850	ATRN
ILMN_1772124	ILMN_1772124	ATRN
ILMN_1666885	ILMN_1666885	ATRX
ILMN_1800951	ILMN_1800951	ATXN1
ILMN_2153332	ILMN_2153332	ATXN1
ILMN_1705900	ILMN_1705900	ATXN10
ILMN_2169676	ILMN_2169676	ATXN10
ILMN_3233871	ILMN_3233871	ATXN1L
ILMN_1743829	ILMN_1743829	ATXN2
ILMN_2271627	ILMN_2271627	ATXN2L
ILMN_2354334	ILMN_2354334	ATXN2L
ILMN_2393497	ILMN_2393497	ATXN3
ILMN_1664177	ILMN_1664177	ATXN7L2
ILMN_1862018	ILMN_1862018	ATXN7L3
ILMN_2231911	ILMN_2231911	AUH
ILMN_1651378	ILMN_1651378	AUP1
ILMN_1680955	ILMN_1680955	AURKA
ILMN_2357438	ILMN_2357438	AURKA
ILMN_1768396	ILMN_1768396	AURKAIP1
ILMN_2053650	ILMN_2053650	AURKAPS1
ILMN_1684217	ILMN_1684217	AURKB
ILMN_1749081	ILMN_1749081	AUTS2
ILMN_1710216	ILMN_1710216	AVEN
ILMN_3237977	ILMN_3237977	AVL9
ILMN_1722292	ILMN_1722292	AVL9
ILMN_1811443	ILMN_1811443	AVP
ILMN_1671731	ILMN_1671731	AVPI1
ILMN_1698324	ILMN_1698324	AVPR2
ILMN_1766185	ILMN_1766185	AXIN1
ILMN_1724480	ILMN_1724480	AXIN2
ILMN_1703123	ILMN_1703123	CSRNP1
ILMN_1746206	ILMN_1746206	CEP131
ILMN_1733680	ILMN_1733680	AZI2
ILMN_1656682	ILMN_1656682	AZIN1
ILMN_1704550	ILMN_1704550	AZIN1
ILMN_2327994	ILMN_2327994	AZIN1
ILMN_2148459	ILMN_2148459	B2M
ILMN_1725427	ILMN_1725427	B2M
ILMN_1787595	ILMN_1787595	B3GALNT1
ILMN_2325347	ILMN_2325347	B3GALNT1
ILMN_1726840	ILMN_1726840	B3GALNT1
ILMN_1780188	ILMN_1780188	B3GALNT2
ILMN_1690682	ILMN_1690682	B3GALT4
ILMN_1739749	ILMN_1739749	B3GALT6
ILMN_1764813	ILMN_1764813	B3GLCT
ILMN_2210581	ILMN_2210581	B3GAT3
ILMN_3246214	ILMN_3246214	B4GAT1
ILMN_1711102	ILMN_1711102	B3GNT2
ILMN_1715384	ILMN_1715384	B4GAT1
ILMN_1702817	ILMN_1702817	B3GNTL1
ILMN_1796663	ILMN_1796663	B4GALNT4
ILMN_1766221	ILMN_1766221	B4GALT1
ILMN_1753755	ILMN_1753755	B4GALT2
ILMN_1806508	ILMN_1806508	B4GALT2
ILMN_1692267	ILMN_1692267	B4GALT3
ILMN_1661500	ILMN_1661500	B4GALT4
ILMN_2380688	ILMN_2380688	B4GALT4
ILMN_1685824	ILMN_1685824	B4GALT5
ILMN_1732555	ILMN_1732555	B4GALT6
ILMN_1663541	ILMN_1663541	B4GALT7
ILMN_3239284	ILMN_3239284	B9D1
ILMN_1806999	ILMN_1806999	B9D2
ILMN_1807181	ILMN_1807181	BACH1
ILMN_1685398	ILMN_1685398	BAD
ILMN_1738652	ILMN_1738652	BAD
ILMN_3244893	ILMN_3244893	BAG2
ILMN_1659766	ILMN_1659766	BAG3
ILMN_2221014	ILMN_2221014	BAG4
ILMN_1727996	ILMN_1727996	BAG4
ILMN_2361695	ILMN_2361695	BAG5
ILMN_1728514	ILMN_1728514	BAG5
ILMN_2206141	ILMN_2206141	BAGE5
ILMN_1739256	ILMN_1739256	BAHD1
ILMN_1703593	ILMN_1703593	BAIAP2L1
ILMN_1771652	ILMN_1771652	BAIAP2L2
ILMN_1805990	ILMN_1805990	BAK1
ILMN_1691410	ILMN_1691410	BAMBI
ILMN_2179837	ILMN_2179837	BANF1
ILMN_1749243	ILMN_1749243	BANF1
ILMN_1661646	ILMN_1661646	BANK1
ILMN_1663631	ILMN_1663631	BANP
ILMN_1701216	ILMN_1701216	BANP
ILMN_1768363	ILMN_1768363	BAP1
ILMN_2074258	ILMN_2074258	BARD1
ILMN_1651826	ILMN_1651826	BASP1
ILMN_1686626	ILMN_1686626	DDX39B
ILMN_1760563	ILMN_1760563	PRRC2A
ILMN_2408179	ILMN_2408179	PRRC2A
ILMN_1743137	ILMN_1743137	PRRC2C
ILMN_3247802	ILMN_3247802	PRRC2B
ILMN_1705364	ILMN_1705364	BAG6
ILMN_2390416	ILMN_2390416	BAG6
ILMN_1742782	ILMN_1742782	GPANK1
ILMN_2152402	ILMN_2152402	ABHD16A
ILMN_1668822	ILMN_1668822	BATF
ILMN_1763207	ILMN_1763207	BATF3
ILMN_1683300	ILMN_1683300	BAX
ILMN_1742230	ILMN_1742230	BAZ1A
ILMN_1658327	ILMN_1658327	BAZ1A
ILMN_1680831	ILMN_1680831	BAZ1B
ILMN_1676318	ILMN_1676318	BAZ2A
ILMN_1720850	ILMN_1720850	BAZ2B
ILMN_1729645	ILMN_1729645	BBC3
ILMN_1800590	ILMN_1800590	BBS1
ILMN_1741985	ILMN_1741985	BBS10
ILMN_2230035	ILMN_2230035	BBS2
ILMN_1767612	ILMN_1767612	BBS2
ILMN_1762466	ILMN_1762466	BBS4
ILMN_1703111	ILMN_1703111	BBS7
ILMN_1776656	ILMN_1776656	BBS7
ILMN_1775012	ILMN_1775012	BBS7
ILMN_2257833	ILMN_2257833	BBS7
ILMN_1794956	ILMN_1794956	BBS9
ILMN_2352159	ILMN_2352159	BBS9
ILMN_1745415	ILMN_1745415	BBX
ILMN_1697642	ILMN_1697642	BCAP29
ILMN_2342084	ILMN_2342084	BCAP29
ILMN_1737380	ILMN_1737380	BCAP29
ILMN_1812403	ILMN_1812403	BCAP31
ILMN_1672596	ILMN_1672596	BCAR1
ILMN_1763638	ILMN_1763638	BCAR3
ILMN_1733042	ILMN_1733042	BCAS1
ILMN_2136147	ILMN_2136147	BCAS1
ILMN_1751760	ILMN_1751760	BCAS2
ILMN_2148452	ILMN_2148452	BCAS2
ILMN_2054510	ILMN_2054510	BCAS3
ILMN_1808059	ILMN_1808059	BCAS4
ILMN_2325506	ILMN_2325506	BCAS4
ILMN_1766169	ILMN_1766169	BCAT1
ILMN_1695110	ILMN_1695110	BCAT2
ILMN_1771966	ILMN_1771966	BCCIP
ILMN_1811188	ILMN_1811188	BCCIP
ILMN_1786433	ILMN_1786433	BCCIP
ILMN_1758090	ILMN_1758090	BCCIP
ILMN_1796113	ILMN_1796113	BCDIN3D
ILMN_2176592	ILMN_2176592	BCHE
ILMN_1685641	ILMN_1685641	BCHE
ILMN_1735979	ILMN_1735979	BCKDHA
ILMN_2390453	ILMN_2390453	BCKDHB
ILMN_1764166	ILMN_1764166	BCKDHB
ILMN_1655433	ILMN_1655433	BCKDHB
ILMN_1693394	ILMN_1693394	BCKDK
ILMN_1716446	ILMN_1716446	BCL10
ILMN_1704070	ILMN_1704070	BCL10
ILMN_2255133	ILMN_2255133	BCL11A
ILMN_1659800	ILMN_1659800	BCL11A
ILMN_1752899	ILMN_1752899	BCL11A
ILMN_2342271	ILMN_2342271	BCL11A
ILMN_1665761	ILMN_1665761	BCL11B
ILMN_1701120	ILMN_1701120	BCL2
ILMN_1801119	ILMN_1801119	BCL2
ILMN_2363250	ILMN_2363250	BCL2
ILMN_2246956	ILMN_2246956	BCL2
ILMN_1769229	ILMN_1769229	BCL2A1
ILMN_1654118	ILMN_1654118	BCL2L1
ILMN_1742410	ILMN_1742410	BCL2L1
ILMN_1749096	ILMN_1749096	BCL2L10
ILMN_1774997	ILMN_1774997	BCL2L11
ILMN_2359627	ILMN_2359627	BCL2L11
ILMN_1731193	ILMN_1731193	BCL2L12
ILMN_2396982	ILMN_2396982	BCL2L12
ILMN_1752953	ILMN_1752953	BCL2L12
ILMN_2181445	ILMN_2181445	BCL2L13
ILMN_1746561	ILMN_1746561	BCL2L2
ILMN_1710514	ILMN_1710514	BCL3
ILMN_1737314	ILMN_1737314	BCL6
ILMN_1706886	ILMN_1706886	BCL7A
ILMN_1754199	ILMN_1754199	BCL7B
ILMN_2367275	ILMN_2367275	BCL7B
ILMN_2371147	ILMN_2371147	BCL7C
ILMN_1704452	ILMN_1704452	BCL9
ILMN_1743966	ILMN_1743966	BCL9L
ILMN_1775192	ILMN_1775192	BCLAF1
ILMN_2357272	ILMN_2357272	BCLAF1
ILMN_1690321	ILMN_1690321	BCLAF1
ILMN_1814686	ILMN_1814686	BCO1
ILMN_1773117	ILMN_1773117	BCOR
ILMN_1767015	ILMN_1767015	BCORL1
ILMN_2333146	ILMN_2333146	BCR
ILMN_1738529	ILMN_1738529	BCS1L
ILMN_1678757	ILMN_1678757	BCYRN1
ILMN_1799280	ILMN_1799280	BDH1
ILMN_1687149	ILMN_1687149	BDP1
ILMN_1744822	ILMN_1744822	BECN1
ILMN_1754062	ILMN_1754062	BEND3
ILMN_2375032	ILMN_2375032	BEND3
ILMN_1740094	ILMN_1740094	BEND4
ILMN_1796574	ILMN_1796574	BEND4
ILMN_3237256	ILMN_3237256	BEND4
ILMN_3237448	ILMN_3237448	BEND5
ILMN_3238319	ILMN_3238319	BEND6
ILMN_1706969	ILMN_1706969	BEND6
ILMN_3178043	ILMN_3178043	BEND7
ILMN_1796685	ILMN_1796685	BEST4
ILMN_1684042	ILMN_1684042	BET1
ILMN_2060652	ILMN_2060652	BET1L
ILMN_1702637	ILMN_1702637	BEX1
ILMN_2181892	ILMN_2181892	BEX2
ILMN_2351638	ILMN_2351638	BEX4
ILMN_1806473	ILMN_1806473	BEX5
ILMN_1814808	ILMN_1814808	BFAR
ILMN_1690217	ILMN_1690217	BFSP2
ILMN_1755818	ILMN_1755818	BGLAP
ILMN_1768534	ILMN_1768534	BHLHE40
ILMN_1726809	ILMN_1726809	BHLHE41
ILMN_1708131	ILMN_1708131	BHLHB9
ILMN_1699585	ILMN_1699585	BHLHE22
ILMN_2362034	ILMN_2362034	BICD1
ILMN_2380418	ILMN_2380418	BICD2
ILMN_2372413	ILMN_2372413	BID
ILMN_1763386	ILMN_1763386	BID
ILMN_2259495	ILMN_2259495	BID
ILMN_1770505	ILMN_1770505	BIK
ILMN_2309245	ILMN_2309245	BIN1
ILMN_1674160	ILMN_1674160	BIN1
ILMN_1708485	ILMN_1708485	BIN3
ILMN_2182704	ILMN_2182704	BIRC2
ILMN_1768194	ILMN_1768194	BIRC2
ILMN_2405684	ILMN_2405684	BIRC3
ILMN_1776181	ILMN_1776181	BIRC3
ILMN_1681644	ILMN_1681644	BIRC3
ILMN_2349459	ILMN_2349459	BIRC5
ILMN_1803124	ILMN_1803124	BIRC5
ILMN_1801605	ILMN_1801605	BIRC6
ILMN_1674036	ILMN_1674036	BIRC7
ILMN_1805826	ILMN_1805826	BIVM
ILMN_2214098	ILMN_2214098	BIVM
ILMN_1675612	ILMN_1675612	BLCAP
ILMN_1668277	ILMN_1668277	BLK
ILMN_1709484	ILMN_1709484	BLM
ILMN_1721921	ILMN_1721921	BLMH
ILMN_2142935	ILMN_2142935	BLNK
ILMN_2157510	ILMN_2157510	BLOC1S1
ILMN_1679782	ILMN_1679782	BLOC1S2
ILMN_1691436	ILMN_1691436	BLVRA
ILMN_1797793	ILMN_1797793	BLVRB
ILMN_2106656	ILMN_2106656	BLZF1
ILMN_2106658	ILMN_2106658	BLZF1
ILMN_1695354	ILMN_1695354	BMF
ILMN_2308338	ILMN_2308338	BMF
ILMN_1700915	ILMN_1700915	BMI1
ILMN_1722718	ILMN_1722718	BMP2
ILMN_2299045	ILMN_2299045	BMP2K
ILMN_1811148	ILMN_1811148	BMP2K
ILMN_1814200	ILMN_1814200	BMP2K
ILMN_1740900	ILMN_1740900	BMP4
ILMN_1747650	ILMN_1747650	BMP6
ILMN_2123415	ILMN_2123415	BMP8B
ILMN_1706957	ILMN_1706957	BMPR1A
ILMN_2070896	ILMN_2070896	BMPR2
ILMN_1789095	ILMN_1789095	BMPR2
ILMN_1772713	ILMN_1772713	BMS1
ILMN_3238183	ILMN_3238183	BMS1P1
ILMN_1734410	ILMN_1734410	BNIP1
ILMN_2318733	ILMN_2318733	BNIP1
ILMN_1770803	ILMN_1770803	BNIP2
ILMN_1724658	ILMN_1724658	BNIP3
ILMN_2045419	ILMN_2045419	BNIP3L
ILMN_1718961	ILMN_1718961	BNIP3L
ILMN_1699989	ILMN_1699989	BNIPL
ILMN_1793966	ILMN_1793966	BOLA1
ILMN_1782633	ILMN_1782633	BOLA2
ILMN_1656382	ILMN_1656382	BOLA2
ILMN_2298511	ILMN_2298511	BOLA2
ILMN_1703894	ILMN_1703894	BOLA2
ILMN_1659343	ILMN_1659343	BOLA2
ILMN_1810680	ILMN_1810680	BOLA2
ILMN_1786658	ILMN_1786658	BOLA3
ILMN_2343010	ILMN_2343010	BOLA3
ILMN_1715583	ILMN_1715583	BOP1
ILMN_2147920	ILMN_2147920	BRD7P3
ILMN_2352921	ILMN_2352921	BPGM
ILMN_1657746	ILMN_1657746	BPHL
ILMN_1712718	ILMN_1712718	BPNT1
ILMN_1688381	ILMN_1688381	BPTF
ILMN_1652472	ILMN_1652472	BRAF
ILMN_1738027	ILMN_1738027	BRCA1
ILMN_1771065	ILMN_1771065	BRCA1
ILMN_1697546	ILMN_1697546	BRCC3
ILMN_1730019	ILMN_1730019	BRD1
ILMN_1758918	ILMN_1758918	BRD2
ILMN_1785635	ILMN_1785635	BRD3
ILMN_1771061	ILMN_1771061	BRD4
ILMN_1696420	ILMN_1696420	BRD7
ILMN_2082810	ILMN_2082810	BRD7
ILMN_2349600	ILMN_2349600	BRD8
ILMN_1701711	ILMN_1701711	BRD8
ILMN_1651405	ILMN_1651405	BRD9
ILMN_1781085	ILMN_1781085	STAP1
ILMN_2363489	ILMN_2363489	BABAM2
ILMN_1778684	ILMN_1778684	BABAM2
ILMN_1703686	ILMN_1703686	BRF1
ILMN_1665554	ILMN_1665554	BRF2
ILMN_1781580	ILMN_1781580	BRI3
ILMN_1797693	ILMN_1797693	BRI3BP
ILMN_1803570	ILMN_1803570	BRI3BP
ILMN_1800619	ILMN_1800619	BRI3BP
ILMN_2155172	ILMN_2155172	BRIX1
ILMN_1679800	ILMN_1679800	BRIX1
ILMN_2398432	ILMN_2398432	BRMS1
ILMN_1719165	ILMN_1719165	BRMS1
ILMN_1775943	ILMN_1775943	BRMS1L
ILMN_2225511	ILMN_2225511	BRMS1L
ILMN_1727813	ILMN_1727813	MPC2
ILMN_1666967	ILMN_1666967	MPC1
ILMN_2226324	ILMN_2226324	MPC1
ILMN_1669308	ILMN_1669308	BRPF1
ILMN_2365549	ILMN_2365549	BRPF1
ILMN_1658800	ILMN_1658800	BRPF3
ILMN_2185845	ILMN_2185845	BRSK1
ILMN_1656045	ILMN_1656045	CELF6
ILMN_1805111	ILMN_1805111	BRWD1
ILMN_1673518	ILMN_1673518	BRWD1
ILMN_1662896	ILMN_1662896	WDR11
ILMN_2086222	ILMN_2086222	WDR11
ILMN_1757794	ILMN_1757794	BRWD3
ILMN_1774596	ILMN_1774596	BSCL2
ILMN_1734483	ILMN_1734483	BSDC1
ILMN_1778374	ILMN_1778374	BSG
ILMN_3242325	ILMN_3242325	BSPH1
ILMN_3247560	ILMN_3247560	BSPRY
ILMN_1723480	ILMN_1723480	BST2
ILMN_1676842	ILMN_1676842	BTAF1
ILMN_2411264	ILMN_2411264	BTBD1
ILMN_1691927	ILMN_1691927	BTBD1
ILMN_1809344	ILMN_1809344	BTBD10
ILMN_1732885	ILMN_1732885	SLX4
ILMN_1707481	ILMN_1707481	ZBTB44
ILMN_3238274	ILMN_3238274	BTBD2
ILMN_1713964	ILMN_1713964	BTBD3
ILMN_2334350	ILMN_2334350	BTBD3
ILMN_1744725	ILMN_1744725	BTBD6
ILMN_1687743	ILMN_1687743	BTBD7
ILMN_1757298	ILMN_1757298	BTBD7
ILMN_2319414	ILMN_2319414	BTF3
ILMN_1659762	ILMN_1659762	BTF3
ILMN_2245676	ILMN_2245676	BTF3
ILMN_2072140	ILMN_2072140	BTF3L4
ILMN_1759359	ILMN_1759359	BTF3L4
ILMN_1775743	ILMN_1775743	BTG1
ILMN_1770085	ILMN_1770085	BTG2
ILMN_1707339	ILMN_1707339	BTG3
ILMN_2154836	ILMN_2154836	BTG3
ILMN_1662026	ILMN_1662026	BTK
ILMN_1778536	ILMN_1778536	BTLA
ILMN_2099528	ILMN_2099528	BTLA
ILMN_2364852	ILMN_2364852	BTN2A1
ILMN_1752758	ILMN_1752758	BTN2A2
ILMN_1802708	ILMN_1802708	BTN3A1
ILMN_1700067	ILMN_1700067	BTN3A2
ILMN_1676528	ILMN_1676528	BTN3A2
ILMN_2373831	ILMN_2373831	BTN3A3
ILMN_1815718	ILMN_1815718	BTRC
ILMN_2202948	ILMN_2202948	BUB1
ILMN_1797307	ILMN_1797307	BUB1B
ILMN_1693145	ILMN_1693145	BUB3
ILMN_1778764	ILMN_1778764	BUB3
ILMN_2386100	ILMN_2386100	BUB3
ILMN_1749210	ILMN_1749210	BUD13
ILMN_1710697	ILMN_1710697	BUD31
ILMN_1682792	ILMN_1682792	BYSL
ILMN_2111229	ILMN_2111229	TSPOAP1
ILMN_1704760	ILMN_1704760	BZW1
ILMN_1793846	ILMN_1793846	BZW1
ILMN_1676548	ILMN_1676548	BZW2
ILMN_1767556	ILMN_1767556	DEPP1
ILMN_1738955	ILMN_1738955	ANAPC16
ILMN_1783247	ILMN_1783247	LRMDA
ILMN_1680110	ILMN_1680110	ADIRF
ILMN_1734010	ILMN_1734010	CCDC186
ILMN_1761411	ILMN_1761411	MCMBP
ILMN_1665508	ILMN_1665508	NA
ILMN_1704785	ILMN_1704785	FUOM
ILMN_1791656	ILMN_1791656	EDRF1
ILMN_1701243	ILMN_1701243	TWNK
ILMN_1658830	ILMN_1658830	WBP1L
ILMN_2158594	ILMN_2158594	R3HCC1L
ILMN_1772706	ILMN_1772706	BORCS7
ILMN_2151056	ILMN_2151056	BORCS7
ILMN_1684497	ILMN_1684497	PYROXD2
ILMN_1662470	ILMN_1662470	FAM241B
ILMN_1742604	ILMN_1742604	FRA10AC1
ILMN_2128639	ILMN_2128639	PROSER2
ILMN_2205963	ILMN_2205963	VSIR
ILMN_1672717	ILMN_1672717	TMEM254
ILMN_2118472	ILMN_2118472	FAM213A
ILMN_1754538	ILMN_1754538	FAM213A
ILMN_1718520	ILMN_1718520	RNLS
ILMN_1783873	ILMN_1783873	RNLS
ILMN_1765232	ILMN_1765232	RNLS
ILMN_1710207	ILMN_1710207	SLF2
ILMN_1777591	ILMN_1777591	HOGA1
ILMN_1719577	ILMN_1719577	C10orf67
ILMN_1792110	ILMN_1792110	ARMH3
ILMN_2301163	ILMN_2301163	SFR1
ILMN_1671905	ILMN_1671905	SFR1
ILMN_2101719	ILMN_2101719	FAM204A
ILMN_1775423	ILMN_1775423	C10orf88
ILMN_1802192	ILMN_1802192	C10orf99
ILMN_2128967	ILMN_2128967	C11orf1
ILMN_1786759	ILMN_1786759	TMEM258
ILMN_1788356	ILMN_1788356	AKIP1
ILMN_2359029	ILMN_2359029	AKIP1
ILMN_1752988	ILMN_1752988	AKIP1
ILMN_2077094	ILMN_2077094	VPS51
ILMN_1808163	ILMN_1808163	C11orf24
ILMN_1786872	ILMN_1786872	SELENOH
ILMN_1652602	ILMN_1652602	LMNTD2
ILMN_1653836	ILMN_1653836	KIAA1549L
ILMN_1767642	ILMN_1767642	ARL14EP
ILMN_2160718	ILMN_2160718	DNHD1
ILMN_1739345	ILMN_1739345	LBHD1
ILMN_1664773	ILMN_1664773	C11orf49
ILMN_2341487	ILMN_2341487	C11orf49
ILMN_1726104	ILMN_1726104	ANAPC15
ILMN_2213297	ILMN_2213297	C11orf54
ILMN_1664738	ILMN_1664738	C11orf54
ILMN_1728965	ILMN_1728965	NKAPD1
ILMN_1802649	ILMN_1802649	C11orf58
ILMN_3249949	ILMN_3249949	C11orf58
ILMN_3250798	ILMN_3250798	C11orf58
ILMN_1815878	ILMN_1815878	LAMTOR1
ILMN_1677080	ILMN_1677080	IFT46
ILMN_2073263	ILMN_2073263	MSANTD2
ILMN_1773148	ILMN_1773148	MSANTD2
ILMN_2243516	ILMN_2243516	JHY
ILMN_1680659	ILMN_1680659	JHY
ILMN_1779163	ILMN_1779163	AAMDC
ILMN_1757847	ILMN_1757847	C11orf68
ILMN_2049693	ILMN_2049693	C11orf71
ILMN_1781419	ILMN_1781419	HIKESHI
ILMN_1656463	ILMN_1656463	HIKESHI
ILMN_1659017	ILMN_1659017	C11orf74
ILMN_1798270	ILMN_1798270	SMCO4
ILMN_1790637	ILMN_1790637	C11orf80
ILMN_1790100	ILMN_1790100	DDIAS
ILMN_3240370	ILMN_3240370	UQCC3
ILMN_1795564	ILMN_1795564	SPINDOC
ILMN_1811437	ILMN_1811437	MYRF
ILMN_1777765	ILMN_1777765	C12orf10
ILMN_2196335	ILMN_2196335	INTS13
ILMN_2196337	ILMN_2196337	INTS13
ILMN_1804611	ILMN_1804611	TMEM263
ILMN_2180371	ILMN_2180371	FAM216A
ILMN_1745497	ILMN_1745497	METTL25
ILMN_1792671	ILMN_1792671	C12orf29
ILMN_1788810	ILMN_1788810	NAA25
ILMN_2077733	ILMN_2077733	NAA25
ILMN_2122176	ILMN_2122176	LLPH
ILMN_2229922	ILMN_2229922	KIAA1551
ILMN_1726289	ILMN_1726289	KIAA1551
ILMN_1751898	ILMN_1751898	C12orf4
ILMN_1713189	ILMN_1713189	KANSL2
ILMN_1737818	ILMN_1737818	C12orf43
ILMN_2169856	ILMN_2169856	C12orf43
ILMN_1772527	ILMN_1772527	ATG101
ILMN_1728435	ILMN_1728435	C12orf45
ILMN_1727055	ILMN_1727055	PARPBP
ILMN_1654429	ILMN_1654429	PARPBP
ILMN_2161556	ILMN_2161556	C12orf49
ILMN_1791792	ILMN_1791792	TIGAR
ILMN_3244516	ILMN_3244516	HECTD4
ILMN_1667857	ILMN_1667857	RITA1
ILMN_1675616	ILMN_1675616	C12orf54
ILMN_1812191	ILMN_1812191	C12orf57
ILMN_2234710	ILMN_2234710	C12orf60
ILMN_2234709	ILMN_2234709	C12orf60
ILMN_1804656	ILMN_1804656	COX14
ILMN_1667510	ILMN_1667510	C12orf65
ILMN_1736995	ILMN_1736995	C12orf66
ILMN_3245006	ILMN_3245006	CCDC184
ILMN_2152429	ILMN_2152429	C12orf76
ILMN_1753265	ILMN_1753265	C12orf76
ILMN_3247187	ILMN_3247187	C12orf77
ILMN_2223350	ILMN_2223350	SPRYD7
ILMN_1658494	ILMN_1658494	RGCC
ILMN_1773388	ILMN_1773388	RUBCNL
ILMN_2196550	ILMN_2196550	RUBCNL
ILMN_2391551	ILMN_2391551	PROSER1
ILMN_1795128	ILMN_1795128	PROSER1
ILMN_1682774	ILMN_1682774	TEX30
ILMN_1736816	ILMN_1736816	SKA3
ILMN_1693431	ILMN_1693431	LACC1
ILMN_1761486	ILMN_1761486	BORA
ILMN_3243945	ILMN_3243945	MZT1
ILMN_1755882	ILMN_1755882	RNF219
ILMN_1700276	ILMN_1700276	JKAMP
ILMN_1758093	ILMN_1758093	TMEM260
ILMN_1740165	ILMN_1740165	NRDE2
ILMN_2374076	ILMN_2374076	NRDE2
ILMN_1769757	ILMN_1769757	DNAAF2
ILMN_1807667	ILMN_1807667	CCDC198
ILMN_2083789	ILMN_2083789	CCDC198
ILMN_1666208	ILMN_1666208	MIS18BP1
ILMN_3269775	ILMN_3269775	TMEM251
ILMN_3193306	ILMN_3193306	TMEM251
ILMN_1706305	ILMN_1706305	COX16
ILMN_1699091	ILMN_1699091	GPATCH2L
ILMN_2265093	ILMN_2265093	GPATCH2L
ILMN_1771629	ILMN_1771629	SDR39U1
ILMN_1704238	ILMN_1704238	DTD2
ILMN_1712748	ILMN_1712748	GSKIP
ILMN_2181883	ILMN_2181883	GSKIP
ILMN_2186858	ILMN_2186858	ZNF839
ILMN_1734440	ILMN_1734440	VIPAS39
ILMN_2111918	ILMN_2111918	PCNX4
ILMN_1680781	ILMN_1680781	PCNX4
ILMN_1781102	ILMN_1781102	VCPKMT
ILMN_2394193	ILMN_2394193	VCPKMT
ILMN_1685781	ILMN_1685781	GON7
ILMN_2193315	ILMN_2193315	EFCAB11
ILMN_1806825	ILMN_1806825	CEP128
ILMN_1699676	ILMN_1699676	SPTSSA
ILMN_2053281	ILMN_2053281	L3HYPDH
ILMN_1667374	ILMN_1667374	L3HYPDH
ILMN_2078724	ILMN_2078724	APOPT1
ILMN_1661945	ILMN_1661945	SLIRP
ILMN_1721106	ILMN_1721106	DGLUCY
ILMN_1696708	ILMN_1696708	RTRAF
ILMN_3261811	ILMN_3261811	DHRS4-AS1
ILMN_3187771	ILMN_3187771	DHRS4-AS1
ILMN_1711543	ILMN_1711543	RIOX1
ILMN_2393450	ILMN_2393450	INF2
ILMN_3243606	ILMN_3243606	SAMD15
ILMN_1756877	ILMN_1756877	IFT43
ILMN_2157709	ILMN_2157709	IGBP1P1
ILMN_1652722	ILMN_1652722	ATP5MPL
ILMN_1698085	ILMN_1698085	NOP9
ILMN_1807031	ILMN_1807031	C14orf28
ILMN_1779279	ILMN_1779279	MAPK1IP1L
ILMN_1804396	ILMN_1804396	IRF2BPL
ILMN_2412922	ILMN_2412922	ELMSAN1
ILMN_1763091	ILMN_1763091	ELMSAN1
ILMN_1806456	ILMN_1806456	BBOF1
ILMN_1718925	ILMN_1718925	SYNE3
ILMN_1803300	ILMN_1803300	SLC25A47
ILMN_1686082	ILMN_1686082	CLBA1
ILMN_1653553	ILMN_1653553	TEDC1
ILMN_2134381	ILMN_2134381	ITPK1-AS1
ILMN_1724897	ILMN_1724897	C14orf93
ILMN_1657744	ILMN_1657744	FAM219B
ILMN_1652008	ILMN_1652008	KNSTRN
ILMN_2141807	ILMN_2141807	KNSTRN
ILMN_2150000	ILMN_2150000	EMC7
ILMN_1808956	ILMN_1808956	TMEM266
ILMN_1739854	ILMN_1739854	KATNBL1
ILMN_1793729	ILMN_1793729	C15orf39
ILMN_1660585	ILMN_1660585	C15orf40
ILMN_1747217	ILMN_1747217	C15orf41
ILMN_1674662	ILMN_1674662	TICRR
ILMN_1771326	ILMN_1771326	INTS14
ILMN_2268026	ILMN_2268026	INTS14
ILMN_1795524	ILMN_1795524	INTS14
ILMN_2413318	ILMN_2413318	CCDC32
ILMN_1811264	ILMN_1811264	CCDC32
ILMN_1663484	ILMN_1663484	HYPK
ILMN_2073543	ILMN_2073543	HYPK
ILMN_1774990	ILMN_1774990	METTL26
ILMN_2369826	ILMN_2369826	METTL26
ILMN_1801118	ILMN_1801118	SNRNP25
ILMN_2369580	ILMN_2369580	NPRL3
ILMN_1733581	ILMN_1733581	NPRL3
ILMN_1713884	ILMN_1713884	TSR3
ILMN_1787324	ILMN_1787324	ENKD1
ILMN_1815812	ILMN_1815812	CDIP1
ILMN_1717324	ILMN_1717324	MOSMO
ILMN_2194828	ILMN_2194828	PAGR1
ILMN_1727444	ILMN_1727444	PAGR1
ILMN_1777129	ILMN_1777129	CENPT
ILMN_1765880	ILMN_1765880	USB1
ILMN_1685289	ILMN_1685289	C16orf58
ILMN_1656452	ILMN_1656452	TEDC2
ILMN_1783333	ILMN_1783333	CMC2
ILMN_1729450	ILMN_1729450	VPS35L
ILMN_1790650	ILMN_1790650	FOPNL
ILMN_3237636	ILMN_3237636	CLUHP3
ILMN_1658290	ILMN_1658290	METTL22
ILMN_1693630	ILMN_1693630	VPS9D1
ILMN_1711703	ILMN_1711703	C16orf70
ILMN_1773407	ILMN_1773407	C16orf72
ILMN_1790537	ILMN_1790537	RMI2
ILMN_1759411	ILMN_1759411	BRICD5
ILMN_2112599	ILMN_2112599	CFAP20
ILMN_1697800	ILMN_1697800	C16orf86
ILMN_1690911	ILMN_1690911	C16orf87
ILMN_3246732	ILMN_3246732	KNOP1
ILMN_1759325	ILMN_1759325	C16orf91
ILMN_2179726	ILMN_2179726	CCDC189
ILMN_3237452	ILMN_3237452	C17orf100
ILMN_3195203	ILMN_3195203	OGFOD3
ILMN_3234124	ILMN_3234124	OGFOD3
ILMN_1811991	ILMN_1811991	OGFOD3
ILMN_2388539	ILMN_2388539	OGFOD3
ILMN_1765923	ILMN_1765923	OGFOD3
ILMN_3239959	ILMN_3239959	TEN1
ILMN_1654013	ILMN_1654013	HID1
ILMN_1727078	ILMN_1727078	MIEN1
ILMN_1783645	ILMN_1783645	PIK3R6
ILMN_1656427	ILMN_1656427	GID4
ILMN_2113016	ILMN_2113016	GID4
ILMN_3307733	ILMN_3307733	TEFM
ILMN_1681252	ILMN_1681252	LINC00324
ILMN_1719224	ILMN_1719224	LRRC75A-AS1
ILMN_1702526	ILMN_1702526	ADPRM
ILMN_1763688	ILMN_1763688	C17orf49
ILMN_1776490	ILMN_1776490	C17orf53
ILMN_2056687	ILMN_2056687	TEPSIN
ILMN_2398926	ILMN_2398926	C17orf58
ILMN_1700515	ILMN_1700515	C17orf58
ILMN_1712985	ILMN_1712985	C17orf58
ILMN_2225746	ILMN_2225746	BORCS6
ILMN_1747347	ILMN_1747347	MILR1
ILMN_2201533	ILMN_2201533	TMEM256
ILMN_1750401	ILMN_1750401	CYBC1
ILMN_1812441	ILMN_1812441	FAM222B
ILMN_1676731	ILMN_1676731	ASB16-AS1
ILMN_1707292	ILMN_1707292	C17orf67
ILMN_1743621	ILMN_1743621	LINC02210
ILMN_1711823	ILMN_1711823	FAAP100
ILMN_1807533	ILMN_1807533	SMG8
ILMN_1810107	ILMN_1810107	SPEM2
ILMN_1752947	ILMN_1752947	COPRS
ILMN_1762071	ILMN_1762071	C17orf80
ILMN_1705414	ILMN_1705414	ELP5
ILMN_2341690	ILMN_2341690	ELP5
ILMN_1672554	ILMN_1672554	ELP5
ILMN_2221076	ILMN_2221076	NCBP3
ILMN_3307757	ILMN_3307757	SCIMP
ILMN_1682761	ILMN_1682761	SCIMP
ILMN_3245824	ILMN_3245824	NDUFAF8
ILMN_2043615	ILMN_2043615	OXLD1
ILMN_1805131	ILMN_1805131	OXLD1
ILMN_2390310	ILMN_2390310	MIR22HG
ILMN_2280731	ILMN_2280731	METTL23
ILMN_1688727	ILMN_1688727	METTL23
ILMN_2382724	ILMN_2382724	METTL23
ILMN_3247139	ILMN_3247139	EPOP
ILMN_1713803	ILMN_1713803	C17orf97
ILMN_1707137	ILMN_1707137	C17orf97
ILMN_3247988	ILMN_3247988	C17orf98
ILMN_1671693	ILMN_1671693	TPGS2
ILMN_2207328	ILMN_2207328	TPGS2
ILMN_1658110	ILMN_1658110	FAM210A
ILMN_1805998	ILMN_1805998	C18orf21
ILMN_1736130	ILMN_1736130	RBFA
ILMN_1801822	ILMN_1801822	C18orf25
ILMN_2196588	ILMN_2196588	C18orf32
ILMN_1690442	ILMN_1690442	TMEM241
ILMN_2169089	ILMN_2169089	C18orf54
ILMN_1716006	ILMN_1716006	C18orf54
ILMN_1748916	ILMN_1748916	TIMM21
ILMN_2182531	ILMN_2182531	TIMM21
ILMN_1796074	ILMN_1796074	TYMSOS
ILMN_1784905	ILMN_1784905	PIEZO2
ILMN_1719097	ILMN_1719097	RMC1
ILMN_1787844	ILMN_1787844	MYDGF
ILMN_1703695	ILMN_1703695	C19orf12
ILMN_1664920	ILMN_1664920	C19orf12
ILMN_2406892	ILMN_2406892	URI1
ILMN_1798728	ILMN_1798728	URI1
ILMN_1683905	ILMN_1683905	MISP
ILMN_1808202	ILMN_1808202	R3HDM4
ILMN_1678052	ILMN_1678052	C19orf24
ILMN_1655225	ILMN_1655225	C19orf25
ILMN_1813374	ILMN_1813374	MFSD12
ILMN_2262462	ILMN_2262462	CACTIN
ILMN_2350421	ILMN_2350421	CACTIN
ILMN_1730818	ILMN_1730818	MIR7-3HG
ILMN_1734346	ILMN_1734346	IZUMO4
ILMN_2400546	ILMN_2400546	IZUMO4
ILMN_3240538	ILMN_3240538	C19orf38
ILMN_2173891	ILMN_2173891	FAAP24
ILMN_1694759	ILMN_1694759	SMIM7
ILMN_1784299	ILMN_1784299	TRIR
ILMN_3251733	ILMN_3251733	TRIR
ILMN_1801572	ILMN_1801572	C19orf44
ILMN_1801697	ILMN_1801697	SYNE4
ILMN_1735608	ILMN_1735608	C19orf47
ILMN_1681124	ILMN_1681124	C19orf48
ILMN_2383484	ILMN_2383484	C19orf48
ILMN_1759184	ILMN_1759184	C19orf48
ILMN_1790951	ILMN_1790951	KXD1
ILMN_1726181	ILMN_1726181	TIMM29
ILMN_1671374	ILMN_1671374	C19orf53
ILMN_1729546	ILMN_1729546	C19orf54
ILMN_1757914	ILMN_1757914	WDR83OS
ILMN_1762439	ILMN_1762439	TMEM259
ILMN_1703288	ILMN_1703288	TMEM259
ILMN_2326282	ILMN_2326282	TMEM259
ILMN_3268564	ILMN_3268564	REX1BD
ILMN_3188110	ILMN_3188110	REX1BD
ILMN_1737005	ILMN_1737005	SMG9
ILMN_2396813	ILMN_2396813	BABAM1
ILMN_1806937	ILMN_1806937	BABAM1
ILMN_1786707	ILMN_1786707	EMC10
ILMN_1750400	ILMN_1750400	C19orf66
ILMN_1765684	ILMN_1765684	C19orf70
ILMN_1662578	ILMN_1662578	C1GALT1
ILMN_2401730	ILMN_2401730	C1GALT1C1
ILMN_1751234	ILMN_1751234	C1GALT1C1
ILMN_1756811	ILMN_1756811	LRIF1
ILMN_1725906	ILMN_1725906	RUSC1-AS1
ILMN_1713952	ILMN_1713952	INAVA
ILMN_2089656	ILMN_2089656	DIEXF
ILMN_2077886	ILMN_2077886	C1orf109
ILMN_1727540	ILMN_1727540	C1orf112
ILMN_1674817	ILMN_1674817	C1orf115
ILMN_1786273	ILMN_1786273	C1orf122
ILMN_2082130	ILMN_2082130	C1orf123
ILMN_1655485	ILMN_1655485	SPRTN
ILMN_2371470	ILMN_2371470	SPRTN
ILMN_1759464	ILMN_1759464	SPRTN
ILMN_1784207	ILMN_1784207	PITHD1
ILMN_1805474	ILMN_1805474	C1orf131
ILMN_1787280	ILMN_1787280	AUNIP
ILMN_2076940	ILMN_2076940	MEAF6
ILMN_2064311	ILMN_2064311	MINOS1
ILMN_1657860	ILMN_1657860	MINOS1
ILMN_1734915	ILMN_1734915	METTL18
ILMN_1672811	ILMN_1672811	C1orf159
ILMN_1772790	ILMN_1772790	MAB21L3
ILMN_1754894	ILMN_1754894	C1orf162
ILMN_1757415	ILMN_1757415	COA7
ILMN_1675024	ILMN_1675024	BEND5
ILMN_1675055	ILMN_1675055	MUL1
ILMN_1751569	ILMN_1751569	ERICH3
ILMN_3236244	ILMN_3236244	C1orf174
ILMN_1777437	ILMN_1777437	LEXM
ILMN_1690209	ILMN_1690209	RHEX
ILMN_1789058	ILMN_1789058	RNF207
ILMN_1790713	ILMN_1790713	C1orf189
ILMN_1734486	ILMN_1734486	TSEN15
ILMN_1657683	ILMN_1657683	C1orf198
ILMN_3256801	ILMN_3256801	ATP1A1-AS1
ILMN_2196232	ILMN_2196232	C1orf210
ILMN_1693226	ILMN_1693226	SMIM12
ILMN_1659975	ILMN_1659975	C1orf216
ILMN_1789436	ILMN_1789436	DENND1B
ILMN_1667966	ILMN_1667966	FAM129A
ILMN_2193498	ILMN_2193498	TRMT1L
ILMN_1665300	ILMN_1665300	TRMT1L
ILMN_1692834	ILMN_1692834	SWT1
ILMN_1681741	ILMN_1681741	COA6
ILMN_1790202	ILMN_1790202	C1orf35
ILMN_1735143	ILMN_1735143	THEMIS2
ILMN_1681340	ILMN_1681340	HSPB11
ILMN_1729509	ILMN_1729509	C1orf43
ILMN_1660602	ILMN_1660602	C1orf43
ILMN_1801941	ILMN_1801941	C1orf50
ILMN_1742611	ILMN_1742611	C1orf52
ILMN_1661595	ILMN_1661595	C1orf53
ILMN_1702231	ILMN_1702231	C1orf54
ILMN_1748291	ILMN_1748291	SDE2
ILMN_1780268	ILMN_1780268	C1orf56
ILMN_1657446	ILMN_1657446	NTPCR
ILMN_1654864	ILMN_1654864	BROX
ILMN_1682428	ILMN_1682428	HENMT1
ILMN_1759652	ILMN_1759652	C1orf61
ILMN_1749915	ILMN_1749915	RSRP1
ILMN_1760556	ILMN_1760556	RSRP1
ILMN_1706413	ILMN_1706413	RRNAD1
ILMN_1657144	ILMN_1657144	IBA57
ILMN_1670263	ILMN_1670263	CNST
ILMN_1786470	ILMN_1786470	C1orf74
ILMN_1736234	ILMN_1736234	CHTOP
ILMN_1673544	ILMN_1673544	TCEANC2
ILMN_1698243	ILMN_1698243	GLMP
ILMN_2097790	ILMN_2097790	FAAP20
ILMN_1726989	ILMN_1726989	FAAP20
ILMN_1761278	ILMN_1761278	PIFO
ILMN_1683990	ILMN_1683990	CPLANE2
ILMN_1673752	ILMN_1673752	TMEM234
ILMN_3243682	ILMN_3243682	FAM213B
ILMN_1699217	ILMN_1699217	CCSAP
ILMN_2047354	ILMN_2047354	LINC00467
ILMN_1808769	ILMN_1808769	LINC00467
ILMN_1668996	ILMN_1668996	C1QBP
ILMN_1729288	ILMN_1729288	C1QTNF6
ILMN_1713038	ILMN_1713038	C1QTNF9B
ILMN_1733288	ILMN_1733288	C1RL
ILMN_2082209	ILMN_2082209	TOX2
ILMN_1713561	ILMN_1713561	LAMP5
ILMN_1714667	ILMN_1714667	FAM209B
ILMN_2148497	ILMN_2148497	FAM209B
ILMN_1708016	ILMN_1708016	FAM210B
ILMN_1755909	ILMN_1755909	GID8
ILMN_2049727	ILMN_2049727	OSER1
ILMN_1693004	ILMN_1693004	SOGA1
ILMN_1664242	ILMN_1664242	DZANK1
ILMN_1662640	ILMN_1662640	MT1P3
ILMN_1809767	ILMN_1809767	MROH8
ILMN_1718712	ILMN_1718712	FAM217B
ILMN_2044027	ILMN_2044027	NCOR1P1
ILMN_1793002	ILMN_1793002	C20orf196
ILMN_3188984	ILMN_3188984	ZFAS1
ILMN_1790136	ILMN_1790136	MRGBP
ILMN_2387599	ILMN_2387599	RAB5IF
ILMN_1679195	ILMN_1679195	RAB5IF
ILMN_2283388	ILMN_2283388	RAB5IF
ILMN_1697363	ILMN_1697363	C20orf27
ILMN_1785644	ILMN_1785644	AP5S1
ILMN_1674394	ILMN_1674394	APMAP
ILMN_2404539	ILMN_2404539	TMEM230
ILMN_1806312	ILMN_1806312	TMEM230
ILMN_1721225	ILMN_1721225	AAR2
ILMN_1771815	ILMN_1771815	RTF2
ILMN_1728168	ILMN_1728168	PRELID3B
ILMN_1801633	ILMN_1801633	ROMO1
ILMN_1782095	ILMN_1782095	FAM110A
ILMN_1779974	ILMN_1779974	LINC01620
ILMN_1813344	ILMN_1813344	NDUFAF5
ILMN_2350607	ILMN_2350607	NDUFAF5
ILMN_2176251	ILMN_2176251	MGME1
ILMN_1715625	ILMN_1715625	SLX4IP
ILMN_1728403	ILMN_1728403	URB1-AS1
ILMN_1697872	ILMN_1697872	ZNF295-AS1
ILMN_1758806	ILMN_1758806	C21orf2
ILMN_2211724	ILMN_2211724	LINC00114
ILMN_1682812	ILMN_1682812	GATD3A
ILMN_1737588	ILMN_1737588	GATD3A
ILMN_2386205	ILMN_2386205	GATD3A
ILMN_1668442	ILMN_1668442	LINC00158
ILMN_1712386	ILMN_1712386	MIS18A
ILMN_2171183	ILMN_2171183	MIS18A
ILMN_1777221	ILMN_1777221	SMIM11A
ILMN_1814204	ILMN_1814204	DNAJC28
ILMN_1716838	ILMN_1716838	SPATC1L
ILMN_2411127	ILMN_2411127	YBEY
ILMN_1656297	ILMN_1656297	YBEY
ILMN_1795836	ILMN_1795836	YBEY
ILMN_2310295	ILMN_2310295	C21orf58
ILMN_2310296	ILMN_2310296	C21orf58
ILMN_3307877	ILMN_3307877	C21orf58
ILMN_1764329	ILMN_1764329	CFAP298
ILMN_1776147	ILMN_1776147	CFAP298
ILMN_1682896	ILMN_1682896	PAXBP1
ILMN_2331197	ILMN_2331197	PAXBP1
ILMN_2251978	ILMN_2251978	PAXBP1
ILMN_1712936	ILMN_1712936	PAXBP1
ILMN_1772575	ILMN_1772575	LINC01547
ILMN_1699071	ILMN_1699071	MAP3K7CL
ILMN_2104929	ILMN_2104929	FAM207A
ILMN_2104924	ILMN_2104924	FAM207A
ILMN_1793572	ILMN_1793572	ANKRD20A11P
ILMN_2110496	ILMN_2110496	C21orf91
ILMN_1698166	ILMN_1698166	C21orf91
ILMN_1764410	ILMN_1764410	GUCD1
ILMN_1789405	ILMN_1789405	TANGO2
ILMN_1795991	ILMN_1795991	RTCB
ILMN_1759595	ILMN_1759595	RTL10
ILMN_3307887	ILMN_3307887	PRR14L
ILMN_1706859	ILMN_1706859	SMDT1
ILMN_1717371	ILMN_1717371	C22orf34
ILMN_1737255	ILMN_1737255	LRRC75B
ILMN_1804884	ILMN_1804884	C22orf39
ILMN_2325112	ILMN_2325112	CDPF1
ILMN_1757347	ILMN_1757347	KIAA0930
ILMN_2384513	ILMN_2384513	C2CD2
ILMN_1652512	ILMN_1652512	C2CD2
ILMN_1732404	ILMN_1732404	C2orf15
ILMN_1812688	ILMN_1812688	SLC35F6
ILMN_1795419	ILMN_1795419	CNPPD1
ILMN_1810759	ILMN_1810759	MMADHC
ILMN_2090558	ILMN_2090558	MMADHC
ILMN_1774584	ILMN_1774584	ATRAID
ILMN_2386016	ILMN_2386016	ATRAID
ILMN_1708906	ILMN_1708906	CNOT11
ILMN_1724376	ILMN_1724376	ERLEC1
ILMN_1738099	ILMN_1738099	CAMKMT
ILMN_1804597	ILMN_1804597	DCAF17
ILMN_1661594	ILMN_1661594	C2orf42
ILMN_1660275	ILMN_1660275	LDAH
ILMN_1730631	ILMN_1730631	WDCP
ILMN_1795007	ILMN_1795007	MAIP1
ILMN_1720833	ILMN_1720833	C2orf48
ILMN_1701131	ILMN_1701131	C2orf49
ILMN_2195099	ILMN_2195099	LINC00471
ILMN_1722186	ILMN_1722186	NDUFAF7
ILMN_1787370	ILMN_1787370	NDUFAF7
ILMN_1805148	ILMN_1805148	CLHC1
ILMN_1683065	ILMN_1683065	COA5
ILMN_3251616	ILMN_3251616	KANSL1L
ILMN_3247681	ILMN_3247681	C2orf68
ILMN_3236377	ILMN_3236377	C2orf69
ILMN_2229940	ILMN_2229940	PRADC1
ILMN_1726729	ILMN_1726729	C2orf76
ILMN_1692707	ILMN_1692707	PTRHD1
ILMN_2193175	ILMN_2193175	TIMMDC1
ILMN_1764500	ILMN_1764500	BRK1
ILMN_1761882	ILMN_1761882	C3orf14
ILMN_2224486	ILMN_2224486	C3orf14
ILMN_1676749	ILMN_1676749	MAATS1
ILMN_1689607	ILMN_1689607	NEPRO
ILMN_2331658	ILMN_2331658	NEPRO
ILMN_1750144	ILMN_1750144	CCDC174
ILMN_1671116	ILMN_1671116	XXYLT1
ILMN_1671387	ILMN_1671387	TCAIM
ILMN_1754423	ILMN_1754423	TCAIM
ILMN_1705753	ILMN_1705753	CMSS1
ILMN_2215545	ILMN_2215545	CMSS1
ILMN_1793724	ILMN_1793724	TAMM41
ILMN_1665217	ILMN_1665217	CEP19
ILMN_2288483	ILMN_2288483	CEP19
ILMN_1815682	ILMN_1815682	HMCES
ILMN_1697742	ILMN_1697742	C3orf38
ILMN_2078264	ILMN_2078264	C3orf38
ILMN_3238618	ILMN_3238618	EGFEM1P
ILMN_2184612	ILMN_2184612	C3orf52
ILMN_1690454	ILMN_1690454	FAM212A
ILMN_1797372	ILMN_1797372	C3orf58
ILMN_1700967	ILMN_1700967	MB21D2
ILMN_1691557	ILMN_1691557	NDUFAF3
ILMN_1679339	ILMN_1679339	C3orf62
ILMN_1661409	ILMN_1661409	FAM208A
ILMN_2136455	ILMN_2136455	EOGT
ILMN_1687084	ILMN_1687084	EOGT
ILMN_3241670	ILMN_3241670	ARIH2OS
ILMN_3241169	ILMN_3241169	ELP6
ILMN_1708382	ILMN_1708382	ELP6
ILMN_1724990	ILMN_1724990	ELP6
ILMN_2347789	ILMN_2347789	C4BPB
ILMN_1694588	ILMN_1694588	C4BPB
ILMN_1665066	ILMN_1665066	NOA1
ILMN_2207562	ILMN_2207562	AP1AR
ILMN_2207561	ILMN_2207561	AP1AR
ILMN_1798129	ILMN_1798129	TRMT44
ILMN_1704637	ILMN_1704637	TRMT44
ILMN_1698677	ILMN_1698677	HPF1
ILMN_1761963	ILMN_1761963	ABHD18
ILMN_2069821	ILMN_2069821	FAM241A
ILMN_1700257	ILMN_1700257	FAM241A
ILMN_1812701	ILMN_1812701	C4orf33
ILMN_2224907	ILMN_2224907	SMIM14
ILMN_1713892	ILMN_1713892	SMIM14
ILMN_2225956	ILMN_2225956	FAM218A
ILMN_1666827	ILMN_1666827	TRAPPC11
ILMN_2338921	ILMN_2338921	TRAPPC11
ILMN_1752086	ILMN_1752086	TRAPPC11
ILMN_3249240	ILMN_3249240	C4orf46
ILMN_3237511	ILMN_3237511	C4orf47
ILMN_3239531	ILMN_3239531	C4orf48
ILMN_1746819	ILMN_1746819	C5
ILMN_1689836	ILMN_1689836	C5AR1
ILMN_1680738	ILMN_1680738	NREP
ILMN_1695917	ILMN_1695917	C5orf15
ILMN_1654542	ILMN_1654542	FAM172A
ILMN_1796595	ILMN_1796595	C5orf22
ILMN_1743939	ILMN_1743939	C5orf24
ILMN_1763326	ILMN_1763326	SIMC1
ILMN_2150465	ILMN_2150465	TMEM267
ILMN_1694798	ILMN_1694798	TMEM267
ILMN_1677292	ILMN_1677292	C5orf30
ILMN_1761566	ILMN_1761566	CYSTM1
ILMN_1698770	ILMN_1698770	NADK2
ILMN_1662184	ILMN_1662184	C5orf34
ILMN_2198575	ILMN_2198575	C5orf34
ILMN_1757636	ILMN_1757636	SETD9
ILMN_2225577	ILMN_2225577	POC5
ILMN_2098616	ILMN_2098616	ANXA2R
[truncated: 13,569 more rows]
