# Supplementary material for: Integration of genomics and transcriptomics predicts diabetic retinopathy susceptibility genes
Source: eLife. 2020 Nov 9;9:e59980. doi: 10.7554/eLife.59980 (PMC7728435; doi:10.7554/eLife.59980)
Supplement: Figure 3—source data 1. [file elife-59980-fig3-data1.xlsx]

## Sheet: Table 1
MARKER META_pval chrpos rs10001545 0.8868792 4_88176030 rs1000281 0.04879765 15_72553422 rs10004027 0.7946071 4_88292384 rs10006766 0.8806172 4_88160018 rs100087 0.2386829 11_74450436 rs10009948 0.8135963 4_88336684 rs1001160 0.3008881 1_76358591 rs1001464 0.2580996 7_24769089 rs1001581 0.2703533 19_44065388 rs100192 0.7959347 5_68488174 rs10022237 0.5435393 4_88228228 rs10023606 0.6673641 4_8831…
rs10085842 0.06364503 7_139064582 rs10085901 0.100976 7_139108989 rs10085902 0.1020626 7_139109105 rs1009828 0.512379 21_44306696 rs1009905 0.395198 7_129988689 rs1011810 0.496205 1_42898633 rs1012015 0.8608401 14_94498027 rs1012775 0.8503905 7_24848829 rs10130976 0.5688137 14_23404706 rs10131174 0.8851883 14_94599936 rs10132585 0.0393227 14_23329446 rs10132928 0.07885515 14_94584409 rs10133305 0…
rs10153557 0.8565445 2_212032875 rs10156094 0.7813031 7_76003967 rs10158307 0.2073179 1_211813503 rs10158309 0.2066964 1_211813550 rs10158345 0.1783126 1_224062306 rs10162102 0.9441301 13_21404145 rs10162323 0.9428521 14_64668144 rs10162452 0.06378965 14_23319172 rs10163515 0.0957537 17_64281637 rs10163631 0.7861714 18_49037218 rs1016914 0.5666479 3_99640121 rs10169916 0.668921 2_113603728 rs1017…
rs10221529 0.7945411 19_19209951 rs10221803 0.5690008 2_110270250 rs10222474 0.8454218 3_99862551 rs10222732 0.2756805 4_88295008 rs10224066 0.7827652 7_76004709 rs10226437 0.8831884 7_129984990 rs10227466 0.9377734 7_24843621 rs10228441 0.5194636 7_76032291 rs10228643 0.109174 7_139115420 rs10229358 0.1081919 7_139052545 rs10232532 0.8749506 7_129981480 rs10233226 0.7984683 7_24805180 rs10234851…
rs1026497 0.8554642 12_70298873 rs10265 0.1630546 7_139026152 rs10266412 0.9395028 7_73156211 rs10266515 0.7262381 7_24545032 rs10270398 0.1404197 7_76010456 rs10270776 0.6590987 7_24673223 rs10271297 0.1091398 7_139052310 rs10273527 0.2685805 7_139036598 rs10276688 0.9022642 7_24558055 rs10276782 0.8009705 7_24805240 rs10278588 0.9410772 7_73157481 rs10280724 0.1588495 7_129960862 rs10281200 0.6…
rs10409467 0.131076 19_14578369 rs10409750 0.2250053 19_15791606 rs10409856 0.8747399 19_50063040 rs10410451 0.4226113 19_19181716 rs10410515 0.3546485 19_15953243 rs10412446 0.7362239 19_50067508 rs10415813 0.3185077 19_19689231 rs10416783 0.4995102 19_19133772 rs10416904 0.9349686 19_14578813 rs10417318 0.8464549 19_19249238 rs10417974 0.362007 19_19222070 rs10417980 0.5727224 19_50101713 rs104…
rs10468902 0.3488736 18_29417515 rs10468903 0.7013244 18_29418022 rs10469298 0.3687789 19_50024391 rs10470440 0.6030994 3_136564849 rs10471774 0.9258358 5_68616331 rs10471775 0.4882707 5_68641476 rs10474578 0.1720736 5_78542290 rs1047799 0.0004173205 17_17095487 rs1048145 0.9970502 3_136667405 rs10483639 0.3599881 14_55306457 rs10483683 0.468716 14_58004855 rs10485609 0.227891 20_47665612 rs10485…
rs10497498 0.6707347 2_178479248 rs10497499 0.767034 2_178472165 rs10497500 0.2215255 2_178467748 rs10497504 0.9003598 2_178370040 rs10497506 0.6716569 2_178346574 rs10497551 0.2622304 2_180781544 rs10497553 0.4770501 2_180823590 rs10497554 0.2055975 2_180830251 rs10497555 0.3311428 2_180864967 rs10498471 0.30475 14_55353717 rs10498517 0.3746543 14_65762781 rs10501368 0.08805487 11_58113795 rs105…
rs1052429 0.197976 16_69975360 rs1052618 0.6022759 3_136574501 rs1053874 0.6217896 16_3707747 rs1053962 0.3555185 7_24703298 rs1055055 0.5896445 1_42880516 rs1055099 0.5366117 19_43979589 rs1055690 0.9681745 3_141466147 rs1056810 0.6372363 14_94524216 rs1058074 0.953667 1_67876484 rs1059779 0.3750513 7_73150511 rs1060615 0.2888945 20_33478381 rs1061843 0.1884913 17_39958344 rs1062326 0.2050961 5_…
rs10784837 0.8120638 12_70710681 rs10784838 0.2055189 12_70757341 rs10788662 0.1923633 1_17644587 rs10788664 0.457005 1_17647475 rs10789417 0.8007494 1_43055243 rs10792110 0.5015829 11_57536346 rs10792152 0.1803156 11_58026197 rs10792153 0.1804076 11_58027600 rs10792155 0.1806564 11_58032310 rs10792156 0.179994 11_58034543 rs10792166 0.04571677 11_58155086 rs10793107 0.3556592 11_74695175 rs10793…
rs10863919 0.4202372 1_211811956 rs10870742 0.6844475 13_21258698 rs10873447 0.002273348 14_94572749 rs10873797 0.3094091 1_76377191 rs10875687 0.1458968 12_48134214 rs10879039 0.8806359 12_70290921 rs10879061 0.02109911 12_70342407 rs10879063 0.03330486 12_70350469 rs10879065 0.1549718 12_70351684 rs10879077 0.4969332 12_70429956 rs10879097 0.1311591 12_70543399 rs10879099 0.1765802 12_70554995 …
rs10899058 0.3752872 11_74738814 rs10899059 0.1912229 11_74746553 rs10899060 0.1990706 11_74746631 rs10899065 0.9150508 11_74769574 rs10899068 0.7214318 11_74785720 rs10899075 0.7216275 11_74854669 rs10899076 0.9142517 11_74857436 rs10901173 0.3012533 9_135285010 rs10906692 0.1066626 10_14583701 rs10906694 0.1040114 10_14590010 rs10906695 0.1036295 10_14593858 rs10906696 0.103467 10_14597552 rs10…
rs10949828 0.3520933 7_73216733 rs10949830 0.3460304 7_73242275 rs10952935 0.923659 7_76139395 rs10952936 0.9309902 7_76139453 rs10954268 0.6231759 7_130013024 rs10954646 0.09835669 7_139061069 rs10961 0.2614188 1_223962929 rs11018152 0.2902679 10_129288822 rs11029 0.5970589 13_28239940 rs1105509 0.8221285 3_130955204 rs1105670 0.6601698 1_42870338 rs1105748 0.6388188 18_12663152 rs1106074 0.3759…
rs11078382 0.9678377 17_17215120 rs11078384 0.3274717 17_17228954 rs11079013 0.0579478 17_39947206 rs11079016 0.7549428 17_39976024 rs11079018 0.138277 17_40005650 rs11079019 0.3569583 17_40014076 rs11079020 0.6724462 17_40017491 rs11079024 0.1921493 17_40063083 rs1107960 0.007496234 14_55384340 rs11079644 0.7331874 17_64144613 rs11080330 0.7612318 17_33576894 rs11080585 0.1556056 18_12589240 rs1…
rs11161598 0.249641 1_76240679 rs11161848 0.2927707 1_76367722 rs11161887 0.6824584 1_76386305 rs11161912 0.9970506 1_76405162 rs11163915 0.1104617 1_76130199 rs11163917 0.7398012 1_76131068 rs11163927 0.6902979 1_76132792 rs11164035 0.507223 1_76175274 rs11167267 0.9993278 20_34109273 rs11168232 0.5976805 12_48157198 rs11168236 0.7897949 12_48178604 rs1117380 0.1132508 13_28260105 rs11177804 0.4…
rs11203361 0.6014696 1_17651704 rs11203366 0.6024945 1_17657534 rs11203367 0.6028448 1_17657616 rs11203368 0.6384701 1_17666508 rs11209046 0.4326148 1_67773649 rs11209050 0.6287409 1_67791736 rs11209059 0.9943105 1_67840698 rs11209061 0.7682439 1_67847488 rs11209252 0.2538421 1_68747451 rs11210533 0.2242437 1_42305857 rs11210622 0.8497012 1_42822089 rs11210627 0.7792834 1_42847923 rs11210628 0.74…
rs11236294 0.3766806 11_74739934 rs11236296 0.2014429 11_74747058 rs11236304 0.3699807 11_74752957 rs11236322 0.6512647 11_74797588 rs11236325 0.8018511 11_74805409 rs11236332 0.5936947 11_74825823 rs11236348 0.9390254 11_74856481 rs11236349 0.9201163 11_74856517 rs11236359 0.2974827 11_74870884 rs1124943 0.1773045 1_223993624 rs1124961 0.111314 17_17038385 rs1125030 0.2349799 19_43999634 rs11256…
rs1127155 0.3259717 7_73246461 rs1127156 0.3249607 7_73246496 rs1127796 0.2626148 15_75193004 rs1128349 0.9423385 7_73097654 rs1129568 0.7309275 16_3483475 rs1130741 0.2640634 15_75189930 rs11316 0.2100089 7_73246555 rs113187 0.4060705 11_74503168 rs1132990 0.3733471 19_50028163 rs1133067 0.1052317 7_139053069 rs1133068 0.1040029 7_139053143 rs1133322 0.3523408 15_75212357 rs1133323 0.3528909 15_…
rs1152592 0.6474043 14_64676098 rs1152594 0.8535555 14_64675044 rs1152601 0.906921 14_64667337 rs1152976 0.8696953 12_70310546 rs1152977 0.9176885 12_70308577 rs1153946 0.9810656 1_223960775 rs1153950 0.8477882 1_223959796 rs1153952 0.9855429 1_223958547 rs1153954 0.909435 1_223957335 rs1153976 0.4357111 12_48002400 rs11541143 0.8837569 2_110302464 rs11542226 0.9763557 3_141464231 rs11543230 0.53…
rs11615947 0.7761468 12_70724053 rs11618177 0.5480664 13_115103150 rs11619673 0.8795043 13_21512850 rs11620090 0.6818952 13_114742017 rs11621265 0.06715747 14_55822095 rs11621291 0.8836945 14_94599583 rs11622798 0.9738054 14_94509155 rs11623253 0.06273263 14_94585064 rs11623624 0.01850973 14_23406108 rs11624386 0.7471521 14_21419654 rs11625204 0.1327028 14_55554917 rs11626017 0.5300653 14_9454365…
rs11643487 0.8851026 16_3406516 rs11643983 0.7991583 16_3438865 rs11645214 0.2868275 16_70608987 rs11645287 0.2865084 16_70616298 rs11645437 0.3013731 16_70575852 rs11645585 0.3981557 16_70536836 rs11646287 0.5719865 16_3719344 rs11646318 0.225269 16_29265508 rs11646653 0.3602681 16_28922149 rs11647796 0.4856638 16_56696551 rs11648068 0.8493872 16_3388994 rs11648783 0.5638328 16_3406626 rs1165094…
rs11668620 0.7198027 19_19218490 rs11668793 0.3884329 19_43976706 rs11669913 0.59535 19_4320218 rs11670007 0.01706178 19_15852363 rs11670204 0.5621536 19_19145390 rs11670326 0.0170574 19_15852544 rs11671 0.1971892 19_2354787 rs11671204 0.9120465 19_14652278 rs11671900 0.6033159 19_4246693 rs11672862 0.8765038 19_19262300 rs11673284 0.01773968 19_15851361 rs11675027 0.9285712 2_210965866 rs1167887…
rs11701048 0.6862272 21_44491425 rs11711935 0.1202226 3_99808804 rs11717974 0.7440124 3_136515307 rs11719468 0.6748972 3_99671848 rs11719857 0.9641429 3_99920884 rs11721 0.4699064 1_1152631 rs11721653 0.6776678 4_88274597 rs11727803 0.390783 4_88213158 rs11729 0.3706355 19_19230482 rs11732896 0.9213296 4_88287993 rs11734330 0.7095665 4_88274740 rs11735092 0.7234822 4_88226231 rs11737402 0.7042875…
rs11772447 0.2483711 7_139033589 rs11772686 0.1050789 7_139129371 rs11772771 0.09880965 7_139058803 rs1177556 0.683142 5_68707471 rs1177557 0.609265 5_68703189 rs11795026 0.8108784 9_124916693 rs11799356 0.8675914 1_42931534 rs11802505 0.07762308 1_224065856 rs11804252 0.2413388 1_16642849 rs11804831 0.4397016 1_1194804 rs11805616 0.8670602 1_42966550 rs11806264 0.8849129 1_42916036 rs11810154 0.…
rs1187873 0.1422855 14_55500251 rs1187874 0.141759 14_55498103 rs11880550 0.8093481 19_19272191 rs11887182 0.4055751 2_87364077 rs11889272 0.6421979 2_178432378 rs11889989 0.9850651 2_110266383 rs11894165 0.5489961 2_207624412 rs11895445 0.4807147 2_180844070 rs1189816 0.38083 14_57520465 rs11900095 0.978685 2_211154011 rs1190081 0.1469719 14_57950809 rs1190088 0.1587125 14_57962926 rs11900886 0.…
rs12027539 0.07786842 1_224063971 rs12030939 0.599897 1_17650818 rs12033604 0.60337 1_17658697 rs12037012 0.9057527 1_42916544 rs12037558 0.3794481 1_17608353 rs12037653 0.9148708 1_17600317 rs12037914 0.6029619 1_17658554 rs12038299 0.1738754 1_223960392 rs12039696 0.8719411 1_42918754 rs12040633 0.1773842 1_223965031 rs12041177 0.8720458 1_42971966 rs12042621 0.8764147 1_42982078 rs12043435 0.6…
rs12116575 0.8082512 1_67912259 rs12118542 0.7406461 1_42850546 rs12119170 0.7259962 1_42856160 rs12119764 0.3703589 1_16552772 rs12120676 0.2356079 1_16613660 rs12125933 0.1368747 1_76130920 rs12126155 0.04712059 1_76131555 rs1212641 0.1411987 14_55496131 rs12127780 0.6896978 1_76126205 rs12129523 0.1103276 1_76129223 rs12130832 0.2563872 1_76234294 rs12131344 0.1103324 1_76136437 rs12131407 0.2…
rs12189248 0.1341545 5_78517143 rs1218951 0.6698944 13_28224258 rs1218959 0.05581979 13_28193877 rs1222081 0.9188426 1_223978656 rs1222138 0.8228368 1_223931411 rs1222141 0.6858699 1_223926406 rs1222145 0.6354832 1_223924236 rs1222148 0.9750644 1_223956664 rs1222153 0.7876892 1_223953470 rs1222154 0.5835945 1_223953405 rs1222158 0.9859446 1_223988701 rs12221841 0.664074 11_74618701 rs12223417 0.9…
rs1232981 0.001202116 12_47973661 rs1232985 0.001478351 12_47983096 rs1232987 0.03112054 12_47984214 rs12330283 0.645851 3_136590411 rs1233042 0.08964947 12_48055705 rs1233046 0.008853425 12_48103324 rs1233047 0.007569434 12_48059517 rs1233049 0.007292621 12_48050301 rs1233050 0.007283829 12_48048467 rs1233055 0.007616589 12_48082482 rs1233062 0.7347449 12_48110551 rs12333389 0.5553612 7_25123787…
rs12403920 0.3586177 1_42881680 rs12405571 0.859903 1_42959296 rs12405981 0.7648549 1_67847843 rs12408442 0.05907881 1_16492021 rs12408746 0.7244168 1_42856729 rs12409913 0.648576 1_42856912 rs12412629 0.1487287 10_14743063 rs12418547 0.07851677 11_57751001 rs12419118 0.9014335 11_58381548 rs12419251 0.1804813 11_58033086 rs12419348 0.1175554 11_57758808 rs12419371 0.6150071 11_74424058 rs1242099…
rs12445430 0.6725457 16_3613126 rs12445830 0.6923332 16_70502493 rs12446395 0.1312711 16_70502610 rs12446550 0.1663316 16_28543381 rs12447040 0.6974704 16_3718703 rs12447449 0.9420161 16_3880659 rs12448257 0.8356398 16_3599655 rs12448482 0.8318279 16_28838073 rs12453988 0.4082103 18_48581918 rs12454398 0.1700491 18_12301902 rs12455481 0.6977837 18_12468739 rs12455792 0.4021129 18_48572640 rs12455…
rs12486660 0.4122325 3_100024553 rs12486865 0.2417633 3_99956556 rs12486901 0.2939708 3_99625767 rs12487 0.9023016 15_75136694 rs12487143 0.8763434 3_99893111 rs12487901 0.6026035 3_136590302 rs12488245 0.810157 3_99835254 rs12490140 0.2858917 3_99962992 rs12491153 0.3302677 3_99547089 rs12492610 0.2928583 3_99946822 rs12493124 0.2975639 3_99615263 rs1250876 0.4261896 1_76193232 rs1250880 0.42576…
rs1256040 0.6097137 14_64738394 rs1256043 0.8606439 14_64734282 rs1256044 0.8604032 14_64734027 rs1256045 0.8601792 14_64729760 rs1256048 0.8597753 14_64728280 rs1256056 0.9119146 14_64712626 rs1256059 0.9105061 14_64710417 rs1256061 0.1535564 14_64703593 rs1256065 0.786069 14_64698932 rs1256093 0.2160903 14_64842752 rs1256101 0.1841341 14_64830017 rs1256107 0.1780182 14_64823381 rs1256108 0.1772…
rs12587898 0.02054435 14_94566675 rs12589539 0.8879974 14_23396680 rs12589758 0.3309495 14_55325862 rs12590429 0.2188872 14_23482940 rs12592077 0.02495641 15_57787846 rs12593650 0.02430188 15_57807667 rs12593721 0.02113241 15_57777705 rs12594504 0.0140041 15_57772014 rs12595135 0.02428895 15_57803432 rs12595169 0.02309062 15_57797495 rs12596851 0.02488048 16_70655967 rs12596890 0.9101654 16_35880…
rs12632774 0.713412 3_131080881 rs12637449 0.7927152 3_130961989 rs12637639 0.7187823 3_131080830 rs12637848 0.7427282 3_131068497 rs12637949 0.645643 3_136592187 rs12638527 0.9034976 3_130951482 rs12638591 0.9230619 3_131099640 rs12640451 0.8014726 4_88338435 rs12642212 0.7278594 4_88275366 rs12649023 0.4735938 4_88259008 rs12650763 0.4420787 4_88373463 rs12655567 0.1697374 5_78465698 rs12659146…
rs12740413 0.8496111 1_16515879 rs12741252 0.3165737 1_211822542 rs12743235 0.704247 1_76336757 rs12746451 0.6404915 1_17674821 rs12747191 0.5928753 1_42879345 rs1275103 0.1817514 5_78448105 rs12751725 0.580183 1_16539577 rs12754142 0.7892746 1_223929086 rs12758005 0.1736268 1_211816328 rs1275925 0.2092313 2_26858830 rs12759271 0.6862201 1_67906853 rs1275935 0.3415845 2_26961857 rs1275941 0.20746…
rs12879985 0.7729246 14_94659182 rs12881245 0.01245368 14_94568083 rs12881316 0.5548097 14_94529549 rs12885400 0.4356665 14_55358639 rs12886562 0.2624193 14_94574880 rs12889177 0.007077113 14_23491329 rs1289317 0.2172726 13_99451114 rs12897672 0.8248621 14_21431413 rs12898551 0.9168692 15_75297907 rs12898868 0.06539358 15_72112918 rs12900072 0.9332687 15_75307148 rs12901593 0.6005007 15_73274156 …
rs12957885 0.9191276 18_12516219 rs12958301 0.5982943 18_12585135 rs12958604 0.4273463 18_48560325 rs12959199 0.6518139 18_12673574 rs12960623 0.885783 18_12717876 rs12961307 0.9485095 18_12513416 rs12961711 0.6691186 18_12707767 rs12962476 0.4007655 18_12607210 rs12964717 0.666359 18_12704961 rs12965549 0.6796879 18_12718647 rs12966082 0.6911152 18_12727418 rs12966424 0.8956847 18_12678486 rs129…
rs13006297 0.6773102 2_110280788 rs130066 0.812364 6_31122315 rs13007621 0.9039231 2_207393424 rs13008833 0.7212091 2_178514439 rs13008855 0.5427847 2_113609568 rs13008857 0.7217225 2_178514468 rs13009071 0.9284292 2_210964891 rs13009207 0.6768499 2_178501632 rs13009758 0.8826661 2_211101839 rs13010864 0.3343887 2_210722025 rs13011269 0.2161376 2_181784642 rs13013030 0.3443796 2_210716930 rs13013…
rs1303870 0.607841 1_76359535 rs13039736 0.2034741 20_47492666 rs13041792 0.2556943 20_33545055 rs13042686 0.6740805 20_48035458 rs13044004 0.2194757 20_47718371 rs13044144 0.3540675 20_47528808 rs13044228 0.3209604 20_48007608 rs13044736 0.5368022 20_47419905 rs13051222 0.5139212 21_44304784 rs13051639 0.5256554 21_44290674 rs13059754 0.9771047 3_99678490 rs13064704 0.4641304 3_99767541 rs13068 …
rs13178839 0.5276412 5_68633391 rs13182512 0.181708 5_78573790 rs1319763 0.2251291 17_39991790 rs1319900 0.08130664 15_57830516 rs1320467 0.4835756 13_114901633 rs1320468 0.4456482 13_114901396 rs1320840 0.2751363 2_26949179 rs1320841 0.2760394 2_26945566 rs13225320 0.9617982 7_24870722 rs13227836 0.3580744 7_108064399 rs13227841 0.2636131 7_73279482 rs13228028 0.269363 7_73225067 rs13228948 0.36…
rs13337742 0.3634591 16_70071671 rs13338218 0.395754 16_53446143 rs13343191 0.1404984 11_74670129 rs1335578 0.433196 1_42950208 rs13362324 0.8934579 5_68580434 rs13378757 0.5978756 13_21123302 rs13380027 0.4673987 15_56787114 rs13395560 0.935035 2_207518810 rs13396148 0.3969701 2_207484372 rs13399433 0.3406221 2_207445945 rs13412 0.6283392 17_39967442 rs13412327 0.6459032 2_110291268 rs1341399 0.…
rs1378942 0.871416 15_75077367 rs1383415 0.9441526 2_180857713 rs1383416 0.6864783 2_180857596 rs1384062 0.9344934 3_99597928 rs13858 0.05944066 15_72433144 rs1387647 0.8985405 3_99826942 rs1391518 0.3800123 1_76178735 rs1391520 0.3976788 1_76174752 rs13926 0.3448366 16_3724465 rs1396510 0.2306934 14_57994965 rs1396830 0.9079123 2_211136612 rs1396831 0.9202511 2_211136678 rs1397275 0.7237194 11_5…
rs1433770 0.4265971 11_74430185 rs1433771 0.7631248 11_74433860 rs143383 0.1873321 20_34025983 rs143384 0.4070326 20_34025756 rs1434167 0.5458883 2_110396324 rs1436424 0.3802229 16_56895034 rs1436441 0.194775 17_39981248 rs1437808 0.4988832 17_4175846 rs1437810 0.8121086 12_70498603 rs1446839 0.8875441 2_178475205 rs1448903 0.4712424 2_207308961 rs1448905 0.4748536 2_207311915 rs1449266 0.3639101…
rs151226 0.9246941 16_28549823 rs151228 0.9211397 16_28563026 rs1518 0.7445899 21_44463772 rs1518423 0.05240723 2_180995163 rs1518434 0.05174604 2_180992576 rs1524248 0.799317 12_70706535 rs1524250 0.6215076 12_70738619 rs1527399 0.8648746 2_178500340 rs1527400 0.9029219 2_178522011 rs1527402 0.8555581 2_178513894 rs1527403 0.5673466 2_178516722 rs1527405 0.5472684 2_178525827 rs1527408 0.5472208…
rs1544820 0.4928074 2_207312772 rs1545825 0.3044195 15_72296328 rs1546159 0.9603082 1_67788426 rs1547580 0.869498 2_178528090 rs1547581 0.872979 2_178527789 rs1548323 0.6055238 1_17660697 rs1549011 0.6979184 18_12666932 rs1549601 0.7924383 3_130971625 rs1550931 0.9736733 4_87809387 rs1553933 0.7626687 2_60509080 rs1554011 0.2418496 2_177551886 rs1555985 0.813895 10_14682480 rs1556121 0.6701919 13…
rs1570342 0.0396594 14_23368185 rs1570672 0.8481395 13_21408818 rs1570841 0.2772828 20_34048161 rs1571038 0.9040879 10_14623590 rs1572947 0.5967992 13_100242676 rs1575523 0.1397431 13_28166508 rs1592641 0.1757972 18_12647240 rs1592643 0.3606967 18_12643193 rs1595410 0.1304026 12_70544931 rs1599823 0.8159126 16_56675817 rs1604122 0.8244023 16_56663300 rs1606481 0.0877117 3_99427552 rs1610214 0.841…
rs1635592 0.6463554 1_17663407 rs1635593 0.6465665 1_17663323 rs1635594 0.470336 1_17661805 rs1635597 0.6382264 1_17659556 rs1636645 0.8341464 7_76231596 rs1638074 0.3052157 7_76112060 rs1639150 0.3986166 16_3747204 rs164386 0.7536209 5_68460402 rs164390 0.7580608 5_68463014 rs1644004 0.183196 5_78359036 rs1646119 0.41685 16_29150785 rs1656764 0.9758204 18_49050898 rs166379 0.9992869 2_180868838 …
rs16851704 0.7850038 3_141452359 rs16851717 0.9928697 3_141462748 rs16851720 0.1913686 3_141463298 rs16851736 0.1550194 3_141469078 rs16851740 0.9348438 3_141469631 rs16851752 0.9092376 3_141484778 rs16865433 0.2318461 2_178468493 rs16865443 0.6660507 2_178476212 rs16865444 0.6672957 2_178478059 rs16865446 0.6704163 2_178479149 rs16865448 0.2889121 2_178480532 rs16865449 0.2770119 2_178480772 rs1…
rs16952252 0.6803744 16_53483980 rs16952529 0.6436817 18_48318396 rs16952533 0.6451828 18_48320424 rs16952611 0.4102391 18_48382668 rs16952711 0.9793422 18_48470707 rs16953747 0.3017614 15_72140563 rs16956623 0.03694345 15_72536695 rs16956771 0.2755421 15_72641145 rs16957144 0.08742325 16_67099724 rs16960483 0.5947327 18_48326315 rs16962767 0.9505914 16_56873789 rs16970320 0.8330886 16_70611066 r…
rs1708618 0.03372376 17_17131869 rs1708620 0.008546714 17_17129924 rs1708623 0.006699565 17_17156087 rs1708627 0.04329965 17_17146959 rs1708628 0.002731271 17_17147625 rs170916 0.3488519 21_44448763 rs17092209 0.3550628 20_33592721 rs17092385 0.4444405 20_33739254 rs17092579 0.2703254 20_33918232 rs17092784 0.3650198 20_34142287 rs17092808 0.3830106 14_57521590 rs17093081 0.7826685 14_57813513 rs…
rs17150155 0.2337857 7_24826613 rs17150177 0.3947071 7_24840975 rs17150327 0.6380895 7_24898123 rs17155589 0.1234658 10_14664672 rs17155593 0.3370056 10_14665906 rs17155637 0.29837 7_108025766 rs171634 0.5862425 16_3478866 rs17164872 0.853749 7_130009353 rs17175114 0.2177064 2_180854620 rs1717608 0.719649 3_99401638 rs17179740 0.7095758 14_64756751 rs1718235 0.7217818 3_99583484 rs17183750 0.6153…
rs17265675 0.9499395 3_136045213 rs17266364 0.8832748 3_136101180 rs17269659 0.9249855 13_21527190 rs17270067 0.660063 2_207318062 rs17271603 0.5411589 2_207416322 rs17274256 0.624246 19_14575680 rs17277761 0.8521684 7_24824911 rs17277907 0.9257502 14_23335744 rs17278348 0.3203768 2_207431475 rs17288678 0.1152175 2_207058820 rs17303895 0.2421367 16_70105684 rs1731242 0.5080193 2_26855221 rs173125…
rs17392948 0.6499596 3_99754498 rs17395659 0.7551655 3_100014606 rs1739897 0.7000513 1_76116062 rs17419150 0.3208989 1_16730582 rs17438725 0.2208781 7_40787104 rs17439106 0.2287691 7_40795200 rs17445665 0.2800342 20_47510491 rs17446753 0.8451063 1_67906072 rs17448715 0.2281283 20_47691743 rs17450430 0.1465604 20_47772264 rs17466223 0.9708662 3_136398883 rs17473024 0.8321164 13_100238193 rs1748015…
rs17632 0.2948374 20_47713063 rs17637266 0.1866512 2_203772904 rs17640009 0.2283233 16_28595700 rs17641311 0.05024684 19_15909516 rs17647178 0.2562343 1_76210524 rs17647711 0.5943728 1_76241710 rs17655484 0.5796552 19_44084351 rs17655574 0.5505691 19_44101645 rs17655646 0.4868891 19_44134936 rs17657002 0.2078662 13_100240529 rs17663599 0.557759 18_48380526 rs17682485 0.217698 19_15789698 rs176824…
rs17766755 0.112955 14_64715773 rs17771475 0.5235117 7_40924997 rs17777566 0.2095758 2_180793050 rs17777595 0.2089922 2_180793202 rs17784978 0.457091 4_88893358 rs17786805 0.5703521 2_207497983 rs17787760 0.142725 3_141426649 rs17787772 0.1296386 3_141430963 rs17787778 0.1506885 3_141431209 rs17787802 0.1281605 3_141537991 rs1779658 0.8860175 1_223922254 rs17800727 0.9744123 16_53481010 rs1780149…
rs1788492 0.8909541 21_44460850 rs1789221 0.2224957 18_48408285 rs1789222 0.444333 18_48467202 rs1789223 0.1808247 18_48462210 rs1789226 0.1806111 18_48468355 rs1789693 0.4439163 11_74887165 rs1789694 0.1752321 11_74881682 rs1789946 0.8110203 21_44456890 rs1789947 0.6924894 21_44458292 rs1789952 0.7759388 21_44465533 rs1796810 0.3246791 1_76403305 rs1796813 0.3255663 1_76400403 rs1796815 0.327188…
rs1856791 0.28005 1_76308942 rs1857290 0.1479466 3_99434166 rs1858742 0.05976195 19_49995893 rs1858958 0.493368 7_24516433 rs1859267 0.4887052 19_19124050 rs1859379 0.2433805 16_3608256 rs1859776 0.03802053 7_108043038 rs1860149 0.3673856 19_44118680 rs186116 0.1971749 1_76103670 rs1861350 0.6438143 16_53533342 rs1861351 0.6823222 16_53533227 rs1861353 0.5561011 16_53452081 rs1861437 0.05535805 2…
rs1885117 0.323194 20_33600740 rs1885120 0.6793382 20_33576989 rs1885133 0.6168003 14_58737402 rs1885134 0.6188929 14_58737530 rs1885163 0.3681102 20_47701765 rs1885290 0.2120815 20_47445579 rs1886301 0.2949514 1_17635411 rs1886302 0.6935618 1_17635396 rs1886303 0.3064162 1_17632382 rs1886691 0.4154373 20_33986271 rs1886695 0.9381917 20_34180535 rs1886696 0.4287322 20_34055706 rs1888001 0.6842538…
rs1938648 0.07684088 11_58111513 rs1938649 0.1150086 11_58112130 rs1938650 0.07679583 11_58112357 rs1938661 0.08731759 11_58085774 rs1938666 0.1788159 11_58018422 rs1940973 0.1902232 18_12550747 rs1940974 0.3935698 18_12594652 rs1940975 0.1470155 18_12605682 rs1941633 0.5118488 11_117966677 rs1942093 0.4162537 18_48517432 rs1944616 0.4661949 11_74845104 rs1944618 0.4673889 11_74839404 rs1944620 0…
rs1976101 0.9154949 5_68496452 rs1978653 0.9347962 18_12507120 rs1979459 0.3044195 15_72210762 rs1980048 0.0242404 15_57807377 rs1980118 0.3934884 17_64520446 rs1980190 0.2132247 3_141457998 rs1983016 0.1919085 16_69970329 rs1983528 0.2279438 20_47686290 rs1983639 0.3272909 20_47572282 rs1983893 0.3122425 10_14643470 rs1985166 0.622242 1_16522269 rs1986447 0.1003626 7_139082080 rs1990339 0.733693…
rs2024449 0.4125164 16_53494617 rs2024595 0.2251569 20_47517896 rs2024596 0.2226208 20_47518052 rs2024854 0.5534028 20_34511189 rs2024959 0.2929072 20_47695391 rs2025096 0.245062 20_33540000 rs2027094 0.6028281 14_64664758 rs2027442 0.9449219 13_100332708 rs2027735 0.3327029 18_48505414 rs2028038 0.6142593 7_108351059 rs2028039 0.6173343 7_108351888 rs2029088 0.5129101 2_207297052 rs2029682 0.294…
rs2051755 0.8553447 7_24847842 rs2052713 0.09345889 15_72520392 rs2053857 0.5326829 15_73232762 rs2055390 0.05577645 16_28328226 rs2055951 0.7981753 2_60519000 rs2056071 0.04282513 17_64534580 rs2057168 0.8848995 20_60712347 rs2057169 0.8867667 20_60712284 rs2057170 0.8889132 20_60710563 rs2057280 0.7764525 14_94590223 rs2057281 0.3480586 14_94590406 rs2057368 0.3597931 14_55304009 rs2057369 0.36…
rs2077300 0.1551821 19_50003253 rs2077444 0.5287904 19_4449410 rs2077466 0.9193244 2_110428414 rs2078928 0.3217333 7_24515356 rs2079646 0.5114497 19_44137982 rs2088872 0.9099704 1_42763611 rs2089177 0.7964278 17_16762217 rs2089743 0.2639721 18_48402898 rs2090018 0.0001229321 17_17020967 rs2096863 0.1452658 18_12762350 rs2097821 0.01699886 19_15854303 rs2104417 0.3461839 20_34127871 rs2105665 0.14…
rs2131741 0.6461462 15_57822871 rs2132851 0.4360137 1_16537752 rs2138004 0.88628 17_64522749 rs2141167 0.4287137 7_73100724 rs2144310 0.2478838 14_94557225 rs2144311 0.254107 14_94557887 rs2145082 0.7056717 20_33905326 rs2145598 0.7647078 14_58794001 rs2146579 0.1112613 13_28257045 rs2149770 0.6991945 13_21166108 rs2149771 0.9833914 13_21162509 rs2152314 0.8600844 1_42946462 rs2153672 0.4694398 1…
rs2172613 0.02490108 15_57802472 rs2172614 0.04064546 15_57825607 rs2178018 0.5210777 2_178515810 rs2180059 0.888752 20_60710809 rs2180082 0.2526992 14_94557405 rs2180276 0.2486617 20_33360785 rs2180834 0.006298206 14_23440404 rs2180871 0.622087 14_58739537 rs2181774 0.1859569 13_28130723 rs2181775 0.149812 13_28147555 rs2183080 0.1722034 14_55368986 rs2183081 0.0260408 14_55336751 rs2183085 0.01…
rs221048 0.5939621 1_16530716 rs221049 0.5911634 1_16530850 rs221057 0.1914243 1_16534255 rs221058 0.5449802 1_16534646 rs2214133 0.7848745 7_108342437 rs2214534 0.0002752611 19_15927770 rs2215413 0.439803 17_64249497 rs2215415 0.499323 17_64215571 rs2218575 0.9005708 2_178368997 rs2220839 0.2161356 5_78603510 rs2222520 0.1387571 12_70619227 rs2222711 0.4816624 2_178534110 rs2222712 0.6367463 2_1…
rs2239316 0.2068357 16_3913995 rs2239606 0.9790147 7_130025895 rs2240011 0.4028985 17_40193709 rs2240079 0.09797677 12_48129344 rs2240080 0.09806866 12_48128504 rs2240094 0.4910073 19_19124246 rs2240108 0.7412702 12_48180508 rs2240228 0.2956576 19_15852872 rs2240335 0.734292 1_17674537 rs2240339 0.7416188 1_17674108 rs2240340 0.6250863 1_17662639 rs2240450 0.9867454 7_108209119 rs2240633 0.131105…
rs2248393 0.387389 20_33926103 rs2248444 0.8821881 13_21327726 rs2249830 0.0593865 18_12718815 rs2250205 0.4645493 20_33867924 rs2250712 0.5481099 10_14759792 rs2255307 0.999958 2_180871994 rs2255365 0.5409528 7_24561661 rs2256191 0.7764185 14_64656855 rs2256507 0.2362237 19_44038306 rs2256790 0.6126227 11_74841127 rs2257061 0.4670807 7_24740177 rs2257172 0.8761819 10_14777585 rs2259013 0.1545656…
rs2275274 0.4941872 20_33857544 rs2276123 0.553094 11_117965595 rs2276125 0.4806735 11_117965646 rs2276126 0.5538366 11_117965783 rs2276144 0.9639456 18_29454781 rs2276145 0.5856222 18_29454644 rs2276163 0.4035827 18_48575389 rs2276674 0.7803012 2_207453254 rs2277862 0.1671218 20_34152782 rs2278150 0.2232662 15_72579370 rs2278987 0.05135455 15_72409769 rs2279605 0.4370818 15_57824330 rs2279607 0.…
rs2291959 0.01311064 16_69873992 rs2291961 0.1985994 16_69965592 rs2292443 0.4548514 12_122668091 rs2292526 0.442497 17_17030475 rs2292527 0.197637 17_17126041 rs2292528 0.2185936 17_17080575 rs2292530 0.04823514 17_17075318 rs2293471 0.7185837 2_178487729 rs2293472 0.2558215 2_178487809 rs2293473 0.2457561 2_178488028 rs2293475 0.9230683 2_178407897 rs2293917 0.782324 1_17601083 rs2293930 0.5241…
rs2300048 0.3487068 7_108066989 rs2300966 0.5476303 2_207384137 rs2301249 0.5246366 15_75092384 rs2301888 0.7419421 1_17672730 rs2302421 0.4441458 19_44118353 rs2302768 0.8846657 18_12718593 rs2303449 0.271697 15_72640193 rs2303450 0.2746306 15_72640226 rs2303791 0.3007283 16_70531754 rs2303792 0.07803834 16_70531366 rs2303793 0.4112853 16_70530359 rs2304477 0.5890241 16_56873840 rs2304493 0.8406…
rs234736 0.5808238 21_44451912 rs234737 0.5895274 21_44452763 rs234738 0.5895274 21_44452813 rs234739 0.5895274 21_44452838 rs234740 0.5895274 21_44452948 rs234742 0.6039411 21_44454301 rs234743 0.7928792 21_44454395 rs2347540 0.4070158 1_76119468 rs2348071 0.6125426 14_58730626 rs2348075 0.4013869 14_58853140 rs2353021 0.05891771 17_39944506 rs2355783 0.09995252 7_139075879 rs2355786 0.0983422 7…
rs2390982 0.473816 7_24653778 rs2391000 0.5030975 7_24828055 rs2395964 0.4064996 7_108025163 rs2400088 0.3420444 10_14688307 rs2401193 0.7794491 21_44466767 rs2401195 0.7294898 21_44466887 rs2402408 0.0005025793 14_94564058 rs2402410 0.9787314 14_94565342 rs2402411 0.0003494035 14_94565678 rs2402415 0.0004619666 14_94569772 rs2402443 0.5964304 14_94747990 rs2402997 0.5480105 7_130045683 rs2411453…
rs2425165 0.6055671 20_34438059 rs2425166 0.6086327 20_34439391 rs2425170 0.6120243 20_34442672 rs2425178 0.617221 20_34446395 rs2425180 0.6414568 20_34447160 rs2425191 0.4232929 20_34820813 rs24263 0.624463 1_16522975 rs2427247 0.8701717 20_60722332 rs2427267 0.7792077 20_60728767 rs2428736 0.644271 1_17665091 rs243342 0.613123 19_4406160 rs243372 0.582652 19_4432973 rs243375 0.5266071 19_443708…
rs2501776 0.3363139 1_17619279 rs2501779 0.3725867 1_17627622 rs2501781 0.3725496 1_17628964 rs2501785 0.3360439 1_17630211 rs2501787 0.3266714 1_17630727 rs2501789 0.3155166 1_17631022 rs250531 0.5862965 16_3477444 rs250629 0.9004648 16_3525431 rs250630 0.7959492 16_3524242 rs2509915 0.2913875 11_58399298 rs2509928 0.306442 11_58405458 rs2511989 0.111051 11_57378325 rs2519087 0.06807867 9_135912…
rs2529047 0.6426451 7_24598708 rs2529049 0.8504127 7_24719606 rs2529051 0.5779064 7_24594306 rs2529053 0.3910079 7_24592815 rs2529054 0.7754461 7_24592310 rs2529055 0.5818548 7_24590331 rs2529060 0.9876011 7_24579441 rs2529062 0.9948778 7_24579251 rs2529068 0.7510419 7_24572827 rs2529075 0.5617152 7_24569527 rs2529083 0.2451525 7_24702513 rs2529087 0.6436542 7_24673103 rs2533952 0.7918041 7_76198…
rs2591068 0.5998646 15_57495687 rs2591386 0.1990884 5_78561373 rs2591392 0.16659 5_78546293 rs2596150 0.8196295 13_21317048 rs259809 0.949848 2_180790820 rs259810 0.5387711 2_180787821 rs259835 0.6601304 2_180759729 rs2599435 0.1599315 19_43975299 rs2599437 0.3653532 19_43979439 rs2599438 0.3766344 19_43981272 rs2599440 0.1574283 19_43987950 rs2599442 0.674293 19_43995275 rs2599448 0.5431883 19_4…
rs2681697 0.3686643 3_141500669 rs2682543 0.172341 19_43982467 rs2682547 0.2372333 19_44001057 rs2682551 0.5447416 19_44003708 rs2682552 0.5034201 19_44069741 rs2682560 0.4856515 19_44044548 rs2682562 0.5016752 19_44040997 rs2682563 0.9305874 19_44037328 rs2682566 0.2458642 19_44024942 rs2682568 0.3865606 19_43972254 rs2682578 0.1815265 19_44012880 rs2682581 0.1598587 19_43966506 rs2682582 0.3862…
rs2711119 0.760491 7_24612441 rs2711121 0.7413734 7_24608287 rs2711125 0.6920953 7_24600679 rs2711129 0.5829995 7_24646806 rs2711130 0.8648871 7_24646774 rs2711132 0.5616899 7_24680053 rs2712779 0.1398368 11_74829776 rs2712781 0.7228183 11_74830071 rs2712786 0.2044165 11_74824028 rs2712787 0.8672608 11_74819166 rs2712788 0.2109261 11_74816492 rs2712789 0.8110523 11_74814902 rs2712794 0.1442427 11…
rs2721811 0.60332 7_24749429 rs2721816 0.5262692 7_24699329 rs2721817 0.5264914 7_24700399 rs2721819 0.2914255 7_24742128 rs27227 0.9689904 16_3429778 rs27231 0.9374335 16_3434966 rs2723152 0.628022 2_113645690 rs2723163 0.8736283 2_113694339 rs2723167 0.6601458 2_113621210 rs2723211 0.2978515 2_210880492 rs2723214 0.2572577 2_210908222 rs2723357 0.4939902 15_72121472 rs27242 0.5934298 16_3494207…
rs2772175 0.9661122 13_21300712 rs277447 0.4718564 1_16808694 rs2781379 0.6062242 14_64663083 rs2783779 0.8810143 14_21461502 rs2783781 0.5686595 14_21457804 rs2783786 0.7144547 14_21451545 rs2783794 0.4565451 14_21435750 rs2793770 0.9310819 13_100247809 rs2794382 0.612937 20_34613651 rs2797604 0.9853723 1_242027786 rs2809645 0.4250071 1_42913521 rs2809656 0.8104988 1_43049903 rs2809663 0.5643665…
rs2851077 0.2110915 11_74818380 rs2851078 0.2108006 11_74820146 rs2851079 0.2087666 11_74820542 rs2851080 0.2080291 11_74820757 rs2851081 0.207063 11_74820858 rs2851082 0.2052365 11_74821392 rs2851087 0.1405942 11_74827277 rs2851091 0.6088486 11_74836744 rs2851092 0.6094512 11_74837487 rs2851093 0.4652741 11_74850313 rs2851096 0.7252705 11_74842617 rs2851097 0.4657292 11_74842197 rs2851098 0.6134…
rs2919057 0.430598 11_74702119 rs2922215 0.9347786 15_57829375 rs2922219 0.1275399 15_57767982 rs2922220 0.5044462 15_57768641 rs2922224 0.03062732 15_57783950 rs2922233 0.3345872 15_57809459 rs2922234 0.9322377 4_87784226 rs2929508 0.04124592 15_72246964 rs2929515 0.3044195 15_72219988 rs2929522 0.3044195 15_72305982 rs2929525 0.06499576 15_72287856 rs2929530 0.3044195 15_72261947 rs2929531 0.30…
rs2977224 0.3254811 1_17572789 rs2977225 0.3295266 1_17573439 rs2977228 0.4809249 1_17576499 rs2977230 0.3282336 1_17577318 rs2977262 0.2748093 1_17580066 rs2977268 0.8912217 1_17590522 rs2977269 0.6055339 1_17591077 rs2977293 0.6879268 1_17599444 rs2977295 0.1039802 1_17600437 rs2977299 0.9710088 1_17604701 rs2977300 0.8204005 1_17610466 rs2978381 0.2547029 14_64766652 rs2983733 0.4307485 14_648…
rs304722 0.1080512 19_44113546 rs304723 0.115323 19_44102338 rs304725 0.309008 19_44098963 rs304729 0.6433404 19_44084403 rs304731 0.393537 19_44082945 rs3088014 0.406547 7_24839712 rs3091529 0.2929072 20_47647068 rs3092039 0.2929072 20_47678770 rs3092374 0.2929072 20_47663944 rs3092411 0.2373812 20_47690591 rs3095568 0.2431364 16_53438426 rs3095571 0.5345211 16_53544993 rs3095631 0.4130145 16_53…
rs359260 0.5515696 2_60486936 rs365063 0.1086362 19_44114014 rs367312 0.6160747 13_114930195 rs373105 0.8282379 21_44464803 rs3731803 0.5181921 2_178475702 rs3731804 0.3854348 2_178479479 rs3731806 0.2921821 2_178479661 rs3732083 0.2782912 2_207041053 rs3733886 0.1286311 5_78621668 rs373477 0.5895274 21_44453278 rs3735052 0.21647 7_129944685 rs3737373 0.948125 18_29432833 rs3738374 0.8226728 1_22…
rs3745991 0.4218132 19_4318655 rs3746002 0.4513507 19_44123894 rs3746259 0.9351023 19_19245771 rs3746285 0.05949182 19_2339949 rs3746289 0.0627158 19_2343142 rs3746410 0.8973177 20_34190870 rs3746427 0.1195148 20_33730464 rs3746429 0.3402489 20_33703607 rs3746435 0.3185159 20_33587198 rs3746446 0.3797707 20_33574765 rs3746450 0.2840802 20_33508588 rs3748328 0.5706903 14_94529082 rs3748385 0.35055…
rs3762313 0.8582379 1_67896959 rs3762314 0.8613872 1_67896672 rs3763460 0.009089773 7_108155991 rs3764402 0.4643726 17_64297453 rs3764465 0.3995867 18_48571372 rs3764466 0.4010404 18_48571487 rs3765066 0.6848665 15_75140854 rs3766186 0.1723248 1_1162435 rs3766298 0.9693406 1_17602087 rs3767716 0.906016 1_223936168 rs3768293 0.05149464 1_16467924 rs3768837 0.2858632 2_180835792 rs3768840 0.6042497…
rs3784310 0.03168476 15_72103427 rs3784789 0.875894 15_75082552 rs3785309 0.6097894 16_212649 rs3785354 0.2794681 16_28550667 rs3785506 0.4765896 17_17225701 rs3785617 0.4576306 17_64219015 rs3786567 0.07003287 19_49991789 rs378689 0.7438878 21_44462478 rs3787041 0.7778735 19_19231332 rs3787164 0.3828686 20_34228866 rs3787165 0.3831942 20_34228946 rs3787166 0.4010211 20_34229072 rs3787168 0.38394…
rs3800773 0.1735687 7_129957769 rs3800775 0.2728324 7_129958167 rs3803657 0.6836824 16_53515959 rs3803761 0.0001732737 17_17116412 rs3803762 0.2186038 17_17086330 rs3807344 0.6883223 7_129934219 rs3807345 0.154985 7_129941265 rs3809634 0.8451595 16_53538157 rs3809876 0.4659424 17_39959433 rs3809878 0.7760803 17_40094835 rs3810194 0.9214208 19_50028040 rs3810367 0.4736504 19_4342847 rs3810368 0.60…
rs3818624 0.267463 13_114784122 rs3818646 0.196619 1_1191870 rs3819001 0.2424721 1_1138913 rs3819122 0.430068 18_48610831 rs3820609 0.05134068 1_16467645 rs3821003 0.6707542 2_178479422 rs3821004 0.2923731 2_178480063 rs3821005 0.2895061 2_178480405 rs3821173 0.557204 2_207478160 rs3823580 0.4926371 7_130017436 rs3825779 0.09343377 15_57754232 rs3826305 0.444515 17_17084216 rs3826717 0.04519283 1…
rs3848278 0.2521171 16_69640867 rs3848355 0.7224985 16_3407489 rs3848356 0.9893055 16_3488773 rs3848408 0.2596711 17_64861732 rs3848419 0.5192396 17_64473538 rs3848420 0.38066 17_64473358 rs3848642 0.07831672 19_15795032 rs3852695 0.8796086 16_70459938 rs3856341 0.01293266 2_211334647 rs3856413 0.5697517 2_180779986 rs3856415 0.5357605 2_180807367 rs3856416 0.5875813 2_180807623 rs3856623 0.64759…
rs3922848 0.2024531 7_139046210 rs3923006 0.888999 2_110291087 rs3923442 0.8396697 4_88189733 rs3923852 0.8793813 13_21329785 rs3923853 0.8572232 13_21330192 rs3924006 0.6340347 13_21331779 rs3924296 0.2082265 7_139041927 rs3924340 0.1225882 17_17040941 rs3924376 0.3369642 16_28925978 rs3929 0.6697861 16_53524308 rs3930426 0.1275222 5_78597535 rs3931036 0.3195111 16_70548297 rs3931097 0.3905045 1…
rs4081753 0.5865206 16_70287177 rs4082236 0.8375082 16_70631693 rs40843 0.3809925 7_108132412 rs40847 0.4283241 7_108136099 rs40851 0.4281721 7_108145121 rs4085933 0.6903625 2_207470884 rs40872 0.6921248 7_108151017 rs40874 0.4234834 7_108152319 rs40876 0.4227545 7_108152503 rs40877 0.4213286 7_108156050 rs40878 0.3861477 7_108157011 rs40886 0.3867131 7_108161291 rs4089 0.4124863 4_88221345 rs408…
rs4146442 0.8959921 13_21361513 rs4146884 0.8217637 11_74799470 rs4148973 0.4086989 21_44323590 rs418292 0.8916481 21_44461159 rs422149 0.988169 13_114931086 rs422791 0.8935516 21_44461782 rs423237 0.9875099 13_114930955 rs42329 0.722591 16_3425524 rs4234469 0.3059073 3_141519409 rs4236315 0.2364652 7_24540490 rs4238457 0.5224807 15_73250414 rs4238458 0.5225526 15_73250485 rs4238789 0.8555643 16_…
rs4277599 0.03439114 20_33008905 rs4281980 0.6451811 20_34096581 rs4284632 0.3056608 16_70606555 rs4287665 0.4291283 18_48616656 rs4290346 0.691911 13_100216909 rs4291782 0.3805059 13_28168935 rs4292585 0.7250939 7_24578469 rs4294650 0.6109114 13_21356540 rs4296227 0.1057032 15_73324605 rs4304218 0.3132171 7_73252980 rs4305120 0.07421846 17_64283361 rs4313843 0.8815221 17_16790198 rs4314250 0.474…
rs4374145 0.6718814 15_73273874 rs4375700 0.01883074 17_64510110 rs4378665 0.08189229 17_40143936 rs4381470 0.6484509 13_114752857 rs4383184 0.8787598 17_64519915 rs4387374 0.3466001 11_74732410 rs438889 0.5895274 21_44453277 rs4389196 0.392142 18_12601679 rs4390682 0.4376763 18_48552453 rs4393438 0.4721475 13_114821075 rs4398844 0.205318 7_139043139 rs4404112 0.509729 17_16848920 rs4405723 0.206…
rs4479633 0.5613007 3_99654510 rs4483614 0.6130551 11_74525852 rs4484568 0.9758019 7_73187651 rs4488585 0.4116907 19_4269460 rs4489642 0.0431436 10_14690743 rs4506507 0.7239946 1_17659176 rs4506844 0.09186247 15_72509138 rs4510091 0.964509 18_12535179 rs4511483 0.07973499 15_72138590 rs4511500 0.3225711 15_73271564 rs4513092 0.3040264 16_70600162 rs4513172 0.3488867 18_29430466 rs4514740 1.772228…
rs4588340 0.8713705 3_141496818 rs4592443 0.5596495 11_74765168 rs4594300 0.4820606 17_40098187 rs4607179 0.385153 4_88214144 rs4608189 0.9493524 13_21343209 rs4610302 0.5007386 4_88400110 rs4611222 0.5122443 11_57552265 rs4617691 0.8928293 13_21356650 rs4622543 0.01891321 17_64510410 rs4624231 0.5146953 17_40171130 rs4625664 0.1767732 15_57810391 rs4629023 0.3217378 17_16980791 rs4632263 0.70217…
rs4672385 0.7976669 2_60527504 rs4673350 0.3165315 2_207178872 rs4673360 0.8692345 2_207508741 rs4678274 0.6519057 3_136639237 rs4678275 0.5969365 3_136653683 rs4678448 0.6029706 3_136571189 rs4679 0.8180004 9_124914613 rs4683409 0.5888194 3_141519746 rs4693789 0.9604595 4_87818588 rs4693825 0.5345704 4_88431548 rs4703773 0.1542509 5_78520556 rs4704546 0.15259 5_78520731 rs4704552 0.1709834 5_785…
rs4732366 0.208573 7_139027845 rs4732369 0.09870371 7_139069173 rs4732370 0.1003262 7_139077240 rs4732374 0.1003995 7_139091453 rs4732376 0.1003899 7_139098024 rs4732379 0.1152227 7_139122814 rs4732380 0.1262497 7_139126859 rs4732381 0.2808651 7_139136670 rs473256 0.8280496 11_74631702 rs4748097 0.412949 10_14601356 rs4748102 0.6364455 10_14663139 rs4748106 0.9604774 10_14745120 rs4750542 0.61681…
rs4783956 0.630862 16_56766831 rs4783957 0.8524541 16_56772453 rs4783958 0.8532095 16_56781830 rs4784311 0.6061965 16_53480112 rs4784312 0.7010637 16_53498402 rs4784701 0.4512762 16_56670667 rs4784724 0.1921556 16_56745758 rs4784725 0.836098 16_56761208 rs4784730 0.5413652 16_56865249 rs4784732 0.6387949 16_56894519 rs4785932 0.7240708 16_3410456 rs4785933 0.9072314 16_3419741 rs4785934 0.8172502…
rs4796618 0.1898493 17_40053609 rs4796619 0.1900295 17_40053694 rs4796633 0.4639775 17_40213963 rs4796701 0.2076427 17_39941230 rs4796712 0.1962214 17_39987130 rs4796713 0.5304376 17_39987361 rs4796715 0.5032405 17_39993771 rs4796721 0.5233463 17_40003421 rs4796726 0.7070155 17_40030453 rs4796729 0.8122661 17_40041676 rs4796734 0.7182895 17_40046569 rs4796736 0.1881953 17_40049473 rs4796738 0.191…
rs4807565 0.19404 19_4268543 rs4807572 0.6377465 19_4286419 rs4807578 0.9654524 19_4306311 rs4808171 0.8645782 19_19100115 rs4808172 0.6551085 19_19100787 rs4808178 0.83848 19_19139051 rs4808180 0.7967073 19_19162057 rs4808181 0.8163584 19_19190906 rs4808368 0.2851426 19_15830583 rs4808370 0.533983 19_15844012 rs480840 0.6019334 11_74625997 rs4808895 0.4967041 19_19100676 rs4808906 0.4917483 19_1…
rs4883643 0.7278891 13_114803077 rs4883646 0.9980601 13_114824885 rs4883647 0.08692937 13_114825147 rs4883652 0.4944534 13_114895565 rs4883666 0.7647735 13_114759794 rs4883676 0.1656661 13_114843806 rs4886406 0.8951854 15_75057203 rs4886410 0.7746636 15_75065644 rs4886417 0.9802343 15_75330159 rs4886629 0.7123611 15_75072558 rs4886633 0.1762234 15_75178207 rs4886636 0.2619344 15_75196176 rs488664…
rs4911442 0.2540348 20_33355046 rs4911449 0.2840802 20_33512236 rs4911451 0.2840802 20_33512466 rs4911491 0.4163012 20_33947285 rs4911492 0.4192389 20_33951799 rs4911494 0.4304396 20_33971914 rs4911495 0.2538623 20_33971978 rs4911496 0.4304396 20_33972053 rs4911498 0.291673 20_34007515 rs4911502 0.5359506 20_34063034 rs4911503 0.5382727 20_34063095 rs4911507 0.7566877 20_34075998 rs4911509 0.7036…
rs494394 0.4053688 16_3281891 rs4944061 0.5580432 11_74480548 rs4944067 0.4721686 11_74778675 rs494474 0.3740191 11_74710217 rs4944944 0.5023184 11_74440456 rs4944947 0.7267259 11_74445699 rs4944950 0.5595015 11_74481631 rs4944960 0.6719532 11_74559446 rs4944961 0.7158319 11_74559481 rs4944962 0.2950478 11_74580167 rs4944972 0.602248 11_74776856 rs4951416 0.3848032 1_211804984 rs4951539 0.4008578…
rs4985407 0.1665049 16_70285901 rs4985414 0.1322511 16_70670242 rs4985452 0.2229251 16_69945141 rs4985455 0.2988342 16_69948958 rs4985456 0.2930444 16_69952657 rs4985488 0.6418651 16_70109990 rs4985526 0.4753901 16_70422231 rs4985533 0.2482463 16_70589779 rs4985534 0.2514468 16_70603220 rs4985696 0.001322666 17_17003436 rs4985699 0.005841279 17_17017873 rs4985701 0.0001291615 17_17029718 rs498570…
rs504970 0.903866 11_74474763 rs506028 0.6905245 11_66468469 rs507217 0.4701575 13_28208517 rs507620 0.8781055 11_74496113 rs507868 0.4683994 18_12538482 rs509064 0.02555094 9_135954310 rs511890 0.881351 11_74676512 rs512780 0.5642845 11_74545378 rs512782 0.8464595 11_74512093 rs514534 0.2452081 11_74676794 rs514831 0.4582435 18_12524213 rs515429 0.252048 11_74454247 rs517035 0.8864013 11_7449277…
rs554226 0.4634116 13_28222151 rs554389 0.5600717 18_12473831 rs556734 0.9684942 18_12393623 rs556916 0.9309928 11_74485613 rs557037 0.7740705 11_74562067 rs558303 0.3095084 11_74492842 rs559211 0.3191517 11_74520486 rs559215 0.931466 13_28231697 rs561589 0.5319619 11_74532093 rs562311 0.2087937 2_27098086 rs563247 0.3475139 18_29441422 rs563473 0.9309928 11_74488537 rs563864 0.01122366 9_1359556…
rs5745546 0.6659063 1_76378038 rs5745547 0.3217579 1_76378275 rs5745549 0.7113755 1_76378502 rs5745553 0.3232202 1_76379135 rs5745554 0.6707981 1_76379197 rs5745558 0.671961 1_76379497 rs575063 0.6513208 13_21422911 rs575093 0.4569872 18_12520350 rs577102 0.4826185 11_74490228 rs577504 0.1079273 13_28202336 rs578477 0.8436466 11_74508609 rs578667 0.7174495 18_12498878 rs579581 0.8447683 11_745073…
rs6012617 0.2515761 20_47837126 rs6019463 0.3100494 20_47477867 rs6019493 0.766735 20_47506616 rs6019495 0.7637805 20_47506922 rs6019512 0.2103837 20_47526007 rs6019518 0.327866 20_47531245 rs6019580 0.3333065 20_47625905 rs6019581 0.3333574 20_47627572 rs6019582 0.3333913 20_47627605 rs6019591 0.301142 20_47640029 rs6019601 0.301142 20_47647662 rs6019602 0.301142 20_47651492 rs6019618 0.3011095 …
rs6059867 0.03845468 20_33078103 rs6059868 0.03846161 20_33079460 rs6059875 0.03852625 20_33086090 rs6059880 0.03855478 20_33088669 rs6059887 0.03861557 20_33101102 rs6059892 0.03873984 20_33105766 rs6059893 0.03875459 20_33105897 rs6059896 0.03963518 20_33111783 rs6059897 0.03971107 20_33113224 rs6059918 0.09437886 20_33150503 rs6059926 0.09451045 20_33164804 rs6059932 0.09839486 20_33175466 rs6…
rs6060681 0.5580235 20_34506147 rs6060682 0.2864439 20_34506331 rs6060685 0.3713524 20_34512023 rs6060688 0.5517065 20_34516731 rs6060692 0.5498164 20_34517925 rs6060696 0.5481448 20_34522060 rs6060703 0.5543269 20_34529906 rs6060710 0.5557428 20_34536055 rs6060717 0.5432537 20_34544647 rs6060719 0.5467616 20_34546013 rs6060720 0.5476222 20_34548336 rs6060723 0.4728114 20_34549947 rs6060729 0.471…
rs6087592 0.03985078 20_33114503 rs6087605 0.09859739 20_33180624 rs6087612 0.2905492 20_33230822 rs6087619 0.2002481 20_33288511 rs6087623 0.2228225 20_33317662 rs6087632 0.2657709 20_33407704 rs6087653 0.2754934 20_33522054 rs6087666 0.3400613 20_33640242 rs6087685 0.5256518 20_33777612 rs6087704 0.403133 20_34001058 rs6087709 0.9017424 20_34017944 rs6087720 0.6005969 20_34169284 rs6088502 0.06…
rs6088815 0.423712 20_33976474 rs6088820 0.4149056 20_33987298 rs6088823 0.4098736 20_33994265 rs6088832 0.3385971 20_34006176 rs6088887 0.6791055 20_34171324 rs6088971 0.5563945 20_34535373 rs6089650 0.5065035 20_60682218 rs6089661 0.8889063 20_60711044 rs6089662 0.8874786 20_60711217 rs6089664 0.8910756 20_60714525 rs608986 0.444149 18_48444803 rs6090919 0.2134223 20_47499121 rs6090939 0.301109…
rs6120819 0.3232336 20_33653038 rs6120828 0.3674406 20_33674460 rs6120849 0.3180454 20_33730387 rs6120880 0.3019473 20_33829406 rs6120959 0.6238711 20_34077848 rs6120993 0.5259195 20_34185161 rs6120995 0.9128723 20_34185726 rs6120998 0.2433271 20_34187313 rs6121015 0.3879228 20_34243017 rs6121020 0.3629715 20_34252006 rs6121026 0.3938251 20_34266883 rs6121037 0.3458542 20_34330583 rs6121073 0.558…
rs6142973 0.3220006 20_60751120 rs614342 0.3173687 18_29471317 rs614832 0.8604533 11_74655606 rs615133 0.9737835 11_57684949 rs615284 0.2386057 13_28192930 rs616662 0.7107324 13_28208423 rs616911 0.972874 11_57685334 rs620898 0.338283 18_48509148 rs623306 0.2041688 18_48414404 rs623489 0.07641138 9_135903997 rs623947 0.007079128 12_48002255 rs624786 0.8941406 11_74694029 rs624959 0.005912776 12_4…
rs6433821 0.5030833 2_180837806 rs6435342 0.6439771 2_207465830 rs6439291 0.702197 3_131073912 rs6439622 0.3830275 3_135784877 rs6439663 0.6843856 3_136537044 rs6439664 0.6825587 3_136537074 rs6439672 0.6475512 3_136579199 rs6440032 0.4760211 3_141425418 rs6440033 0.196079 3_141438416 rs6440041 0.9368795 3_141551881 rs6440938 0.5623809 3_99652092 rs6440967 0.9465429 3_99722396 rs6450029 0.9861181…
rs6493934 0.4693285 15_57817408 rs6494973 0.05234552 15_72145728 rs6494976 0.3026419 15_72189606 rs6494992 0.05114956 15_72420750 rs6494997 0.04209874 15_72560642 rs6495000 0.1657675 15_72615903 rs6495035 0.4918636 15_73255815 rs6495039 0.6401742 15_73273696 rs6495040 0.6401049 15_73273708 rs6495042 0.3606347 15_73282726 rs6495122 0.9145514 15_75125645 rs6495126 0.1778293 15_75175026 rs6495127 0.…
rs6502782 0.5108403 17_4272893 rs650298 0.7066627 1_16665608 rs6503664 0.05553438 17_39951581 rs6503670 0.1328683 17_40003141 rs6503671 0.1395167 17_40006279 rs6503675 0.6677714 17_40085665 rs6503679 0.2757969 17_40146970 rs6503680 0.5159308 17_40157533 rs6503684 0.4618061 17_40207384 rs6504406 0.07348828 17_64271724 rs6504407 0.07690433 17_64271989 rs6504440 0.1620146 17_64523356 rs6505443 0.802…
rs6531978 0.3043354 4_88277927 rs6531983 0.1944658 4_88291233 rs6531984 0.1953583 4_88291535 rs6531999 0.6944899 4_88418660 rs653889 0.5390043 11_57570430 rs6540698 0.9524479 1_211807070 rs654136 0.2062258 18_48464204 rs6545796 0.7958841 2_60520855 rs6545797 0.7953354 2_60520885 rs6545798 0.8521494 2_60521311 rs6545799 0.9575026 2_60526618 rs6547711 0.3927537 2_87376944 rs655488 0.8663524 11_7456…
rs658623 0.7740705 11_74567491 rs6586256 0.5295625 21_44294760 rs6586257 0.3601414 21_44295794 rs6586282 0.5629818 21_44478497 rs6586513 0.1356687 1_17216331 rs6586516 0.3725124 1_17625531 rs6588259 0.9911316 1_67834222 rs6588307 0.2422161 1_68755580 rs6591443 0.7558833 11_57719961 rs659165 0.6158371 11_57608992 rs6592593 0.3833413 11_74447734 rs6593520 0.9753017 1_76398305 rs6593521 0.9753354 1_…
rs666466 0.4462542 13_28214369 rs6665722 0.8858732 1_42911502 rs6665969 0.859896 1_42941835 rs6668514 0.1242604 1_223878441 rs6669046 0.7371261 1_223906309 rs6669993 0.8828579 1_42994117 rs6670986 0.4215831 1_211809647 rs6671245 0.5093574 1_223908992 rs6671871 0.6791484 1_76383511 rs6672616 0.8868929 1_16567622 rs6674492 0.7413617 1_223906113 rs6675798 0.4125465 1_1176597 rs667610 0.007913313 12_…
rs6698317 0.7955166 1_16591072 rs6698919 0.9796323 1_224015397 rs6699474 0.9122258 1_67859615 rs6700366 0.9766921 1_224013080 rs6700888 0.8091368 1_16558838 rs670246 0.2442102 11_74690776 rs6702742 0.7538729 1_67890526 rs6703104 0.5965631 1_223874263 rs6703733 0.7183665 1_43018354 rs6708756 0.7972892 2_60521398 rs6710109 0.9042212 2_178377133 rs6711056 0.4393481 2_110419226 rs6713384 0.8411279 2_…
rs6746233 0.631494 2_178472535 rs6746845 0.4083328 2_178518154 rs674965 0.258578 18_48492493 rs6749996 0.9455001 2_211161086 rs675167 0.0355053 9_135913483 rs6752700 0.237741 2_180788188 rs6753473 0.2684345 2_26526419 rs6754172 0.8602544 2_212033884 rs675570 0.3455692 18_29445490 rs675649 0.1791088 18_48446595 rs6756918 0.8404637 2_178487470 rs6757230 0.4353326 2_207326256 rs6759271 0.5315143 2_1…
rs6793077 0.8854553 3_131084641 rs6794262 0.243155 3_141440981 rs6795259 0.2557517 3_141435951 rs6797509 0.6463396 3_136584772 rs6798114 0.7072571 3_99892825 rs6798655 0.8208649 3_99747158 rs6800456 0.2958643 3_99617753 rs6802422 0.4709375 3_99778655 rs6802817 0.9514894 3_99779264 rs6803618 0.6989289 3_136623791 rs6805884 0.3895808 3_99684808 rs6806323 0.947421 3_99722564 rs6807176 0.393114 3_997…
rs6865178 0.9719442 5_68569957 rs6865481 0.9082371 5_68600233 rs686709 0.9408603 18_48417970 rs6874525 0.1990605 5_78574237 rs6875069 0.6734533 5_68631546 rs687550 0.9518911 18_48404973 rs6876783 0.8033268 5_68563065 rs6879078 0.4987924 5_68638941 rs6881767 0.9776359 5_68602746 rs688665 0.7540174 11_74668081 rs6889383 0.1842229 5_78597058 rs689266 0.02906104 9_135914352 rs6893527 0.141547 5_78526…
rs6950461 0.445748 7_24897257 rs6952491 0.7025397 7_24590979 rs6952976 0.3742625 7_73209016 rs6953458 0.2150351 7_129946939 rs6953940 0.2282153 7_129947007 rs6954547 0.09930142 7_139054734 rs6955303 0.4476604 7_24897854 rs6955991 0.9544615 7_129986226 rs6956529 0.2795241 7_129995569 rs6957606 0.2547317 7_130078242 rs6958115 0.55221 7_76036166 rs6960478 0.2358854 7_108035897 rs6960767 0.08460192 7…
rs704581 0.4978128 3_99556160 rs704582 0.3427592 3_99571926 rs704583 0.5644579 3_99643693 rs7047 0.9314275 19_50161807 rs706208 0.2078747 21_44473446 rs706209 0.2075121 21_44473425 rs7074929 0.214968 10_14610101 rs707533 0.301142 20_47652254 rs707534 0.301142 20_47652338 rs7079377 0.1043251 10_14588601 rs7079806 0.8598924 10_14641424 rs7080083 0.970983 10_14693949 rs7082124 0.1728046 10_14577404 …
rs712486 0.8241768 14_23425041 rs7128739 0.6955388 11_74573010 rs7128833 0.5813041 11_74738440 rs713048 0.118573 15_72543084 rs7133869 0.7148184 12_70657876 rs713571 0.1621891 7_24719074 rs7135791 0.2334161 12_48159721 rs7137646 0.2646599 12_70671423 rs7138076 0.7538836 12_48153902 rs7138424 0.1408764 12_70631338 rs7138763 0.1410222 12_70631433 rs7139930 0.7746718 13_100306660 rs7140 0.344108 16_…
rs7153937 0.01496583 14_55470875 rs7154455 0.492342 14_64736660 rs7155309 0.330486 14_55322851 rs7155580 0.6498496 14_58771632 rs7156785 0.004833495 14_23476461 rs7157678 0.05730031 14_55548739 rs7157940 0.00122011 14_94563193 rs7159088 0.4398098 14_21451913 rs7159318 0.3421066 14_21452047 rs7159462 0.9334223 14_64758876 rs7159893 0.5679822 14_23404323 rs7160381 0.3441247 14_21452248 rs7160445 0.…
rs7182268 0.09048356 15_57832206 rs7183055 0.03874966 15_72377048 rs7183196 0.1174093 15_72544401 rs7184359 0.06358325 16_56772157 rs7184439 0.8552103 16_56867804 rs7184597 0.3686525 16_28921809 rs7186533 0.06352568 16_56817162 rs7186573 0.2294348 16_28587389 rs7186754 0.172245 16_53539509 rs7187333 0.1397431 16_28865916 rs7187402 0.650874 16_71213597 rs7187512 0.5269512 16_56840171 rs7187634 0.2…
rs7199618 0.04781041 16_70673517 rs7200430 0.4492025 16_70518934 rs7200737 0.9787189 16_3711656 rs7200901 0.780114 16_56689398 rs7201750 0.3002737 16_70573596 rs7202364 0.06473015 16_56785390 rs7202780 0.323958 16_3560901 rs7203132 0.5079245 16_53429775 rs7203489 0.8440886 16_70037120 rs7204496 0.7013238 16_53496598 rs7204583 0.3169351 16_70553382 rs7204758 0.6764703 16_53482365 rs7205323 0.13852…
rs7216613 0.213149 17_39605214 rs7217091 3.74486e-05 17_17060805 rs7217282 0.282722 17_40026345 rs7217285 0.7966566 17_64848126 rs7217359 7.586833e-05 17_17018177 rs7217560 0.01551774 17_17194838 rs7217970 0.9212436 17_17084930 rs7217971 0.1927728 17_64274401 rs7218425 0.8044062 17_64332562 rs7218480 0.1779959 17_64517960 rs7218781 0.4444624 17_17085409 rs7218795 8.9462e-05 17_17115566 rs7219012 …
rs7230900 0.8797901 18_48305429 rs7231013 0.3211785 18_48502855 rs7231786 0.2408877 18_48363029 rs7233175 0.696769 18_12660285 rs7235783 0.8827985 18_12490502 rs723606 0.0497806 2_207168163 rs7237732 0.1402322 18_12629461 rs7238284 0.4470915 18_48373876 rs723836 0.322532 18_12549850 rs723999 0.0774335 1_224063453 rs7240170 0.2364896 18_48361675 rs724177 0.8478423 10_14651050 rs7242395 0.395431 18…
rs7261862 0.5105595 20_34116282 rs7264396 0.6353213 20_34154741 rs7264419 0.2283623 20_47701309 rs7266550 0.2840973 20_33495510 rs726901 0.3687898 2_110387587 rs7269596 0.2902277 20_33229063 rs7270848 0.301142 20_47639737 rs727121 0.0310779 12_47981292 rs7272164 0.3442683 20_47766197 rs7274173 0.61711 20_47593403 rs7274612 0.2251613 20_47702821 rs7280 0.2422864 20_33864484 rs729167 0.2018914 7_12…
rs732414 0.935951 13_21311977 rs7324188 0.1434621 13_21050170 rs7324447 0.8544311 13_114889995 rs732528 0.4115736 18_48378234 rs7325301 0.2685269 13_114615406 rs7325875 0.9861809 13_21249271 rs7327076 0.9064024 13_114929678 rs7327370 0.8629917 13_114946858 rs7328481 0.8314381 13_100269540 rs7329468 0.261833 13_114599851 rs7329823 0.1443098 13_21050127 rs7330081 0.5060869 13_100241684 rs7330152 0.…
rs739461 0.1228243 19_19715794 rs7395 0.5638248 19_13064322 rs739540 0.3189306 7_24516013 rs739626 0.3573898 7_24852791 rs739627 0.7109207 7_24853496 rs7397585 0.08089481 12_48154582 rs7398 0.8788442 7_76135134 rs7399189 0.3347659 12_48162467 rs7399591 0.6480785 13_114628586 rs7399982 0.2383387 13_114623880 rs7404416 0.7659324 16_3414937 rs7404429 0.8456103 16_3415063 rs740862 0.5855378 16_368967…
rs7500321 0.3201713 16_28977020 rs7501848 0.04310933 17_16904412 rs7501893 0.6137753 17_39311411 rs7502031 0.04354486 17_16904449 rs7502102 0.5998646 17_39307041 rs7502215 0.6039166 17_39306261 rs7503412 0.02352996 17_16906278 rs750487 0.5392998 20_34066645 rs751128 0.6419813 1_223951841 rs7511687 0.04168485 1_211825584 rs7513194 0.3256849 1_76382664 rs7514030 0.7896744 1_42844305 rs7515488 0.939…
rs7549063 0.4871029 1_223909826 rs755021 0.1577259 18_12588054 rs7552849 0.2141329 1_42318430 rs7554588 0.04208864 1_211825827 rs7555183 0.9804579 1_67860627 rs7555491 0.9701082 1_223894889 rs7556286 0.9960743 1_76403382 rs7557043 0.8533561 2_211173237 rs7557537 0.6734178 2_113702530 rs7558336 0.9564269 2_180796377 rs7558962 0.9701317 2_60496246 rs7560080 0.9640265 2_178537103 rs7560514 0.9614638…
rs7586934 0.9499978 2_178537399 rs758742 0.688038 17_17225829 rs758747 0.3914485 16_3627358 rs7588049 0.9168956 2_178390778 rs7588926 0.5560888 2_27342894 rs758944 0.6503614 7_75953297 rs7589927 0.6741087 2_178356416 rs7590230 0.4074669 2_110353072 rs7593426 0.3959524 2_210733835 rs7593744 0.9303637 2_178538820 rs7593753 0.9179211 2_178538834 rs7593808 0.6399237 2_207358016 rs7595063 0.4011443 2_…
rs762551 0.9244903 15_75041917 rs762634 0.2106752 16_28603335 rs7627991 0.4814623 3_99808338 rs7629426 0.5097668 3_99652577 rs7629487 0.757204 3_99860401 rs7629882 0.6439818 3_136604040 rs7631174 0.8154933 3_99913902 rs7631722 0.1448251 3_98970289 rs7632069 0.9090364 3_141475721 rs7632345 0.2689851 3_99670983 rs7632608 0.4957481 3_141342144 rs7634492 0.9120414 3_135824130 rs7634628 0.3848025 3_99…
rs7680878 0.9047801 4_88344651 rs7681829 0.4909052 4_88219930 rs7684895 0.398729 4_88208266 rs7685225 0.126968 4_88906458 rs7687658 0.1835282 4_88220509 rs7688657 0.7420974 4_88163094 rs7688962 0.833674 4_88281182 rs7690728 0.8943597 4_88356799 rs7691791 0.9321912 4_88286409 rs7694379 0.4280762 4_88186509 rs7699556 0.8314662 4_88191100 rs7702523 0.129386 5_78620841 rs7706902 0.9471107 5_68557302 …
rs7796554 0.3496062 7_73220040 rs7797072 0.4205744 7_129979092 rs7797170 0.8844065 7_129979126 rs7797371 0.2731841 7_129979363 rs7799598 0.1134809 7_139051833 rs7799742 0.111041 7_139051878 rs7800795 0.6242245 7_139080348 rs7801613 0.2233053 7_139039927 rs7803640 0.5954695 7_108361460 rs7805434 0.9881866 7_50340750 rs7805824 0.1029111 7_139111169 rs7808740 0.2128453 7_139028955 rs7808823 0.229676…
rs7933631 0.04635711 11_58152533 rs793439 0.7276759 3_99637783 rs793440 0.5127762 3_99643176 rs7934419 0.04583632 11_58155049 rs793443 0.884173 3_99573547 rs793445 0.5521385 3_99576644 rs793446 0.8862515 3_99578114 rs793450 0.2443478 3_99532532 rs793452 0.4218005 3_99529523 rs793453 0.4207605 3_99529095 rs793456 0.770962 3_99525631 rs793458 0.4649952 3_99520169 rs793459 0.4645343 3_99520591 rs793…
rs7947357 0.3408734 11_57414387 rs7948433 0.6160341 11_74419378 rs7951385 0.04629093 11_58152587 rs7952096 0.370878 11_74744502 rs7952209 0.3696411 11_74744581 rs7954981 0.2066814 12_70755469 rs7960335 0.4548008 12_70443393 rs7962566 0.7902435 12_70544050 rs7964113 0.9490272 12_70289063 rs7964974 0.2736366 12_70620671 rs7965814 0.8608207 12_70298129 rs7968203 0.2302105 12_70686063 rs7969013 0.695…
rs7991142 0.4083449 13_21193961 rs7991280 0.6860553 13_21267473 rs7991703 0.7659845 13_100299504 rs7992592 0.07994517 13_100555303 rs7993372 0.7087494 13_100327480 rs7995035 0.9833914 13_21160703 rs7995126 0.220882 13_114803885 rs7995373 0.1639581 13_114875618 rs7995737 0.9617809 13_100280619 rs7995798 0.6344916 13_21338432 rs7995986 0.9956734 13_114938802 rs7997062 0.6109532 13_21368822 rs799771…
rs8007371 0.883217 14_94601479 rs8007736 0.3042888 14_57498663 rs8008658 0.1191451 14_23365756 rs8009527 0.6087075 14_58752112 rs8009579 0.6043251 14_58713559 rs8009997 0.06928278 14_55421911 rs8010043 0.5973054 14_94748346 rs8010057 0.161163 14_23506110 rs8010282 0.3292091 14_55330255 rs8010955 0.6771482 14_23494141 rs8011055 0.5678296 14_23381518 rs8011191 0.6087892 14_58717013 rs8011253 0.8836…
rs8026794 0.4231629 15_57832969 rs8027164 0.05168727 15_72407733 rs8027647 0.05071736 15_72575214 rs8028115 0.06228227 15_72339503 rs8030815 0.05171221 15_72403001 rs8031589 0.5219687 15_73248544 rs8031937 0.1632075 15_75181121 rs8032957 0.3164422 15_72340034 rs8033381 0.7109988 15_75080685 rs8034218 0.4021768 15_57812677 rs8034281 0.7808514 15_75384227 rs8034775 0.8416396 15_57837647 rs8037152 0…
rs8051691 0.06251583 16_56835712 rs8052125 0.374023 16_70537329 rs8052546 0.8614056 16_56747362 rs8052838 0.754103 16_70062095 rs8054140 0.4783287 16_3572694 rs8054222 0.6181862 16_3413477 rs8054299 0.8576218 16_53498655 rs8054731 0.8334412 16_56888006 rs8055138 0.1421233 16_28891465 rs8055756 0.283486 16_69648653 rs8055982 0.1453433 16_28881202 rs8056000 0.9878332 16_3494322 rs8056923 0.4872617 …
rs8064995 0.09581084 17_64281486 rs8065323 0.226025 17_64126960 rs8065502 0.6558512 17_40048613 rs8065832 0.008514729 17_17122327 rs8066111 0.4401151 17_17020375 rs8066133 0.490568 17_33497050 rs8066289 0.9506298 17_64531498 rs8066294 0.05710041 17_64243038 rs8066911 0.9754812 17_33491566 rs8067314 0.979427 17_33491452 rs8068544 0.132359 17_40001008 rs8068857 0.1656693 17_16922312 rs8069241 0.237…
rs8079958 0.1243397 17_40155467 rs8079985 0.4235841 17_64237143 rs8080386 0.1029777 17_17121624 rs8081614 0.07454552 17_64284384 rs8081834 0.3993832 17_64331037 rs8082415 0.6600994 17_64205481 rs8084630 0.4045699 18_48577091 rs8086094 0.1806574 18_12584570 rs8086774 0.2706483 18_12579058 rs8088712 0.3561602 18_48514395 rs8088786 0.3937958 18_12630679 rs8090615 0.5441233 18_29431326 rs8092663 0.42…
rs8111858 0.3466301 19_4326239 rs8111911 0.3093529 19_2306575 rs8112150 0.0003222628 19_15926849 rs8113006 0.3924053 19_19669441 rs8113762 0.03556054 19_44095077 rs8114520 0.8799335 20_33885892 rs8116304 0.4107374 20_34054409 rs8116470 0.4810535 20_34167382 rs8117111 0.2573298 20_47884185 rs8118101 0.2279885 20_47689838 rs8118105 0.3730289 20_47798664 rs8119308 0.3367942 20_47535109 rs8123912 0.2…
rs8557 0.0548513 15_72115733 rs8563 0.1021111 10_14561500 rs8629 0.3255607 7_73245519 rs867443 0.8043688 14_64701042 rs868521 0.7699307 13_114758331 rs870505 0.4655397 11_74846271 rs870506 0.4656135 11_74846252 rs871408 0.7193468 14_21405885 rs871729 0.8128929 9_139538689 rs872227 0.7529147 14_64656165 rs872263 0.2564608 15_75136444 rs873403 0.8378233 10_14761092 rs874540 0.8212275 7_24758161 rs8…
rs886235 0.7452598 7_24769241 rs886431 0.856106 12_48127015 rs888261 0.2754809 18_12748390 rs888262 0.1535607 18_12750218 rs888263 0.2286973 18_12750253 rs888264 0.2295952 18_12750377 rs888928 0.8854554 19_4288205 rs888929 0.893863 19_4288220 rs888930 0.9015394 19_4288332 rs888931 0.7929986 19_4288555 rs8891 0.9199644 7_73096993 rs892149 0.1138151 19_50194845 rs892464 0.6992388 2_110343913 rs8930…
rs919941 0.793439 2_110357351 rs919942 0.6179649 2_110382217 rs9210 0.3944067 15_75128501 rs923001 0.9752885 3_136378415 rs923470 0.4557206 3_99757792 rs923471 0.4560993 3_99757853 rs923472 0.9446903 3_99758029 rs924201 0.5709423 1_16446349 rs927139 0.8745116 14_94602873 rs927140 0.5519334 14_94623337 rs927160 0.301142 20_47654564 rs9285125 0.2130756 13_21062640 rs928554 0.5796185 14_64694195 rs9…
rs9314890 0.1496236 13_114873155 rs9314891 0.1511512 13_114873205 rs9314892 0.7634764 13_114873368 rs9314896 0.7749453 13_114876355 rs9314900 0.5945655 13_114937618 rs9315620 0.165108 13_21061045 rs9315865 0.9850665 13_21354586 rs9315905 0.8137261 13_21404969 rs9315918 0.9507198 13_21420497 rs931991 0.4093769 18_48524625 rs932028 0.02260704 15_57792247 rs932029 0.09314359 15_57792130 rs932276 0.5…
rs941752 0.7280666 14_58799361 rs943188 0.4222693 10_14584301 rs943914 0.09284041 14_55440068 rs9442236 0.6922097 1_16396318 rs9444 0.8021545 11_74553074 rs944462 0.7643821 14_64642018 rs946163 0.3274544 1_76383049 rs947785 0.1663044 11_58053501 rs948301 0.155985 18_12588422 rs948302 0.1569245 18_12588407 rs948319 0.8884278 18_12717272 rs948392 0.007311971 12_48051633 rs948394 0.007325883 12_4805…
rs9509389 0.5495286 13_21407186 rs9509405 0.6544253 13_21438429 rs9509406 0.485892 13_21440496 rs9509407 0.5622798 13_21440856 rs9509410 0.6541417 13_21442945 rs9509411 0.6544358 13_21443247 rs9509415 0.5774367 13_21457769 rs9509417 0.5775599 13_21461460 rs9509418 0.5787517 13_21462857 rs9509423 0.5800657 13_21467197 rs9509426 0.8067463 13_21471433 rs9509428 0.8087833 13_21473952 rs9509441 0.2752…
rs9525293 0.5519617 13_114946692 rs9525319 0.5233797 13_114783504 rs9525340 0.4915478 13_114799733 rs9525348 0.7245033 13_114807997 rs9525355 0.4714075 13_114817659 rs9525356 0.5223034 13_114817751 rs9525359 0.08919869 13_114820598 rs9525386 0.05248255 13_114841826 rs9550655 0.2327123 13_21063974 rs9550672 0.8503252 13_21428380 rs9550675 0.6742895 13_21466641 rs9551373 0.7359428 13_28236652 rs955…
rs9579899 0.696102 13_21156503 rs9579900 0.702437 13_21156746 rs9579908 0.6965679 13_21184466 rs9579912 0.6701919 13_21211911 rs9579932 0.4766572 13_21290644 rs9579937 0.6872303 13_21304731 rs9579950 0.6124347 13_21347384 rs9579954 0.9267689 13_21374333 rs9579955 0.9266573 13_21376974 rs9579958 0.9509394 13_21434615 rs9579960 0.9591751 13_21448259 rs9579965 0.7758932 13_21475195 rs9579981 0.65748…
rs9641410 0.008880983 7_108110701 rs9641411 0.0163221 7_108116414 rs9642120 0.1003717 7_139083971 rs9646423 0.9759456 17_64582171 rs9646427 0.3861157 17_64466383 rs9646473 0.7393801 18_12710623 rs9647713 0.3341529 7_73226807 rs964786 0.5913484 20_34688491 rs9648009 0.8459025 7_24804756 rs9648314 0.7643554 7_24804960 rs9648315 0.336073 7_24850995 rs964915 0.5680174 18_28937474 rs9652160 0.764287 1…
rs9789405 0.02811655 2_211423383 rs9790 0.8095316 16_3586230 rs9796292 0.6774618 13_114740938 rs9798372 0.4354635 2_110275663 rs9803697 0.8971175 1_43003228 rs9803864 0.8314729 1_42879737 rs9805454 0.9333776 13_21305575 rs9806184 0.8536005 15_72536105 rs9806204 0.8524363 15_72536510 rs9806311 0.04133737 15_57812077 rs9806341 0.09836331 15_73300895 rs9808396 0.8530583 2_60520351 rs9811920 0.766073…
rs9850382 0.657761 3_99915939 rs985062 0.4617492 7_24616474 rs9851645 0.4631164 3_99767409 rs9854260 0.6642854 3_99850212 rs9855314 0.7252814 3_136601645 rs985900 0.01699089 19_15854462 rs9859665 0.6442421 3_136602161 rs9860290 0.4041874 3_99839106 rs9860774 0.6031252 3_136565612 rs9864437 0.4600468 3_99764754 rs9865545 0.5458114 3_136573289 rs9867591 0.06619353 3_130974740 rs9868170 0.7710451 3_…
rs9898995 0.0001086916 17_16970658 rs9900213 0.9673334 17_40375881 rs9900495 0.5311605 17_64811502 rs9900575 0.5879227 17_39307675 rs9900934 0.2820668 17_64304968 rs9901804 0.2695838 17_64305161 rs9902316 0.2150511 17_39604539 rs9903086 0.05557975 17_39949516 rs9903251 0.785624 17_40735077 rs9903294 0.006671075 17_17159112 rs9903420 0.1092522 17_40108499 rs9903921 0.1231327 17_64331601 rs9905280 …
rs9929873 0.7002105 16_53490676 rs9930893 0.2146489 16_3625448 rs9931702 0.6676087 16_53526551 rs9931989 0.2692094 16_28906084 rs9933 0.4948656 4_88401616 rs9936087 0.9237515 16_3413734 rs9936741 0.574813 16_56667785 rs9937267 0.9113333 16_3421073 rs9937403 0.3046392 16_53549728 rs9937676 0.813069 16_28969480 rs9938618 0.3327928 16_56626769 rs9938788 0.6738595 16_53481422 rs9938953 0.5308965 16_5…
rs9965959 0.9605605 18_48314004 rs9966118 0.1906155 18_12548858 rs9966530 0.3495143 18_29424289 rs9967026 0.1957876 18_12566483 rs9970772 0.7143503 1_17642273 rs997154 0.003333925 14_23464482 rs9973317 0.4109222 2_210731012 rs9973787 0.3873957 2_210728999 rs9973848 0.4097315 2_210730560 rs9974224 0.5369478 21_44484742 rs9974298 0.5097953 21_44311061 rs997465 0.4369148 11_74699193 rs9982015 0.7052…
