# Supplementary material for: Integration of genomics and transcriptomics predicts diabetic retinopathy susceptibility genes
Source: eLife. 2020 Nov 9;9:e59980. doi: 10.7554/eLife.59980 (PMC7728435; doi:10.7554/eLife.59980)
Supplement: Figure 3—source data 2. [file elife-59980-fig3-data2.xlsx]

## Sheet: rg_pdr_npdr_gene_vs_GTex_v7_Ful
variant_id	rs_id_dbSNP147_GRCh37p13	tissue	gene_symbol	gene_id	ma_samples	ma_count	maf	pvalue
1_1036601_C_T_b37	rs72910156	Brain_Cortex	ISG15	ENSG00000187608.5	9	10	0.0367647	1.0911e-05
1_1036867_AAT_A_b37	rs141449834	Brain_Cortex	ISG15	ENSG00000187608.5	13	14	0.0514706	4.08123e-07
1_1039098_C_A_b37	rs11260595	Brain_Cortex	ISG15	ENSG00000187608.5	9	10	0.0367647	1.0911e-05
1_1046162_A_G_b37	rs6670941	Brain_Cortex	ISG15	ENSG00000187608.5	13	14	0.0514706	4.08123e-07
1_1048640_C_A_b37	rs111483565	Brain_Cortex	ISG15	ENSG00000187608.5	18	20	0.0735294	1.87411e-05
1_1048724_A_C_b37	rs72892214	Brain_Cortex	ISG15	ENSG00000187608.5	18	20	0.0735294	1.87411e-05
1_1050149_G_A_b37	rs57323758	Brain_Cortex	ISG15	ENSG00000187608.5	18	20	0.0735294	1.87411e-05
1_1050701_G_C_b37	rs72892220	Brain_Cortex	ISG15	ENSG00000187608.5	16	18	0.0661765	2.63965e-06
1_1051869_G_C_b37	rs6658634	Brain_Cortex	ISG15	ENSG00000187608.5	16	18	0.0661765	2.63965e-06
1_1052108_A_G_b37	rs6673257	Brain_Cortex	ISG15	ENSG00000187608.5	18	20	0.0735294	1.87411e-05
1_1053871_T_C_b37	rs6683091	Brain_Cortex	ISG15	ENSG00000187608.5	18	20	0.0735294	1.87411e-05
1_1054212_C_T_b37	rs59525363	Brain_Cortex	ISG15	ENSG00000187608.5	18	20	0.0735294	1.87411e-05
1_1054894_G_A_b37	rs58537573	Brain_Cortex	ISG15	ENSG00000187608.5	18	20	0.0735294	1.87411e-05
1_1056006_G_A_b37	rs72892233	Brain_Cortex	ISG15	ENSG00000187608.5	18	20	0.0735294	1.87411e-05
1_1056151_G_A_b37	rs113477232	Brain_Cortex	ISG15	ENSG00000187608.5	18	20	0.0735294	1.87411e-05
1_1056201_T_G_b37	rs141947323	Brain_Cortex	ISG15	ENSG00000187608.5	18	20	0.0735294	1.87411e-05
1_1059270_G_A_b37	rs11808877	Brain_Cortex	ISG15	ENSG00000187608.5	16	18	0.0687023	2.83006e-06
1_1060235_G_A_b37	rs7540009	Brain_Cortex	ISG15	ENSG00000187608.5	13	14	0.0514706	4.08123e-07
1_1062015_C_T_b37	rs9659914	Brain_Cortex	ISG15	ENSG00000187608.5	15	16	0.0592593	2.32338e-06
1_1062290_C_T_b37	rs11260597	Brain_Cortex	ISG15	ENSG00000187608.5	14	15	0.0551471	1.07933e-06
1_1095383_G_A_b37	rs6604973	Thyroid	TNFRSF18	ENSG00000186891.9	140	159	0.199248	1.30941e-05
1_1107842_G_C_b37	rs11260535	Adipose_Visceral_Omentum	TNFRSF18	ENSG00000186891.9	48	52	0.0833333	2.54783e-05
1_1109104_G_T_b37	rs74045197	Adipose_Subcutaneous	TNFRSF18	ENSG00000186891.9	57	61	0.0792208	1.72777e-05
1_1109104_G_T_b37	rs74045197	Adipose_Visceral_Omentum	TNFRSF18	ENSG00000186891.9	45	50	0.0798722	1.53923e-05
1_1109195_A_G_b37	rs5010608	Adipose_Visceral_Omentum	TNFRSF18	ENSG00000186891.9	52	56	0.0894569	2.00898e-05
1_1109311_G_A_b37	rs5010606	Adipose_Visceral_Omentum	TNFRSF18	ENSG00000186891.9	61	66	0.105431	2.32935e-05
1_1109315_C_G_b37	rs5010605	Adipose_Visceral_Omentum	TNFRSF18	ENSG00000186891.9	61	66	0.105431	2.32935e-05
1_1109376_G_A_b37	rs5010604	Adipose_Visceral_Omentum	TNFRSF18	ENSG00000186891.9	46	51	0.0814696	2.08851e-05
1_1110127_C_T_b37	rs11260543	Adipose_Subcutaneous	TNFRSF18	ENSG00000186891.9	57	61	0.0792208	4.40988e-05
1_1110225_C_T_b37	rs11260544	Adipose_Subcutaneous	TNFRSF18	ENSG00000186891.9	61	65	0.0844156	3.08598e-05
1_1110368_C_T_b37	rs11260545	Adipose_Subcutaneous	TNFRSF18	ENSG00000186891.9	60	64	0.0831169	2.97974e-05
1_1110420_T_C_b37	rs12096422	Adipose_Subcutaneous	TNFRSF18	ENSG00000186891.9	60	64	0.0833333	3.30686e-05
1_1111212_G_GAGAGGCTGCCGCTGTGCCGGTGGAGAGGCTGCCGCCGTGCAGGTGGAA_b37	rs775185226	Adipose_Subcutaneous	TNFRSF18	ENSG00000186891.9	47	50	0.0679348	3.26451e-05
1_1112810_G_T_b37	rs28613513	Adipose_Subcutaneous	TNFRSF18	ENSG00000186891.9	55	59	0.0766234	2.21075e-05
1_1113394_C_T_b37	rs12097428	Adipose_Subcutaneous	TNFRSF18	ENSG00000186891.9	55	59	0.0766234	2.21075e-05
1_1114668_G_A_b37	rs6668667	Adipose_Subcutaneous	TNFRSF18	ENSG00000186891.9	54	58	0.0753247	1.14825e-05
1_1118728_C_G_b37	rs12097131	Adipose_Subcutaneous	TNFRSF18	ENSG00000186891.9	53	56	0.0727273	4.18944e-06
1_1121014_G_A_b37	rs3813204	Brain_Anterior_cingulate_cortex_BA24	TNFRSF18	ENSG00000186891.9	19	19	0.087156	1.83819e-06
1_1121014_G_A_b37	rs3813204	Brain_Cortex	TNFRSF18	ENSG00000186891.9	20	21	0.0772059	6.87218e-10
1_1121014_G_A_b37	rs3813204	Brain_Frontal_Cortex_BA9	TNFRSF18	ENSG00000186891.9	19	20	0.0847458	6.55668e-06
1_1121014_G_A_b37	rs3813204	Thyroid	TNFRSF18	ENSG00000186891.9	84	91	0.114035	2.06299e-05
1_1121014_G_A_b37	rs3813204	Muscle_Skeletal	TNFRSF18	ENSG00000186891.9	84	93	0.0947047	7.25429e-07
1_1121341_C_T_b37	rs4297230	Brain_Anterior_cingulate_cortex_BA24	TNFRSF18	ENSG00000186891.9	20	20	0.0917431	2.76619e-06
1_1121341_C_T_b37	rs4297230	Muscle_Skeletal	TNFRSF18	ENSG00000186891.9	93	102	0.10387	1.98016e-06
1_1121341_C_T_b37	rs4297230	Brain_Frontal_Cortex_BA9	TNFRSF18	ENSG00000186891.9	21	22	0.0932203	2.43237e-06
1_1121341_C_T_b37	rs4297230	Thyroid	TNFRSF18	ENSG00000186891.9	92	99	0.12406	6.93946e-05
1_1121341_C_T_b37	rs4297230	Brain_Cortex	TNFRSF18	ENSG00000186891.9	21	22	0.0808824	3.28265e-09
1_1121358_A_C_b37	rs80057011	Whole_Blood	TNFRSF18	ENSG00000186891.9	77	80	0.108696	1.59732e-06
1_1121358_A_C_b37	rs80057011	Lung	TNFRSF18	ENSG00000186891.9	77	80	0.104439	1.36533e-05
1_1121625_C_G_b37	rs4081334	Thyroid	TNFRSF18	ENSG00000186891.9	91	98	0.123116	6.15345e-05
1_1121625_C_G_b37	rs4081334	Muscle_Skeletal	TNFRSF18	ENSG00000186891.9	92	101	0.103061	2.19347e-06
1_1121625_C_G_b37	rs4081334	Brain_Anterior_cingulate_cortex_BA24	TNFRSF18	ENSG00000186891.9	20	20	0.0917431	2.76619e-06
1_1121625_C_G_b37	rs4081334	Brain_Frontal_Cortex_BA9	TNFRSF18	ENSG00000186891.9	20	21	0.0897436	5.18246e-06
1_1121625_C_G_b37	rs4081334	Brain_Cortex	TNFRSF18	ENSG00000186891.9	20	21	0.0777778	7.64524e-10
1_1121715_C_T_b37	rs4081333	Whole_Blood	TNFRSF18	ENSG00000186891.9	81	84	0.113821	1.5316e-06
1_1121794_G_A_b37	rs11260549	Thyroid	TNFRSF18	ENSG00000186891.9	84	91	0.114322	4.0981e-05
1_1121794_G_A_b37	rs11260549	Brain_Anterior_cingulate_cortex_BA24	TNFRSF18	ENSG00000186891.9	19	19	0.087156	1.83819e-06
1_1121794_G_A_b37	rs11260549	Muscle_Skeletal	TNFRSF18	ENSG00000186891.9	85	94	0.0959184	4.24797e-07
1_1121794_G_A_b37	rs11260549	Brain_Frontal_Cortex_BA9	TNFRSF18	ENSG00000186891.9	19	20	0.0847458	6.55668e-06
1_1121794_G_A_b37	rs11260549	Brain_Cortex	TNFRSF18	ENSG00000186891.9	20	21	0.0772059	6.87218e-10
1_1122024_T_C_b37	rs4314833	Brain_Cortex	TNFRSF18	ENSG00000186891.9	20	21	0.0772059	6.87218e-10
1_1122024_T_C_b37	rs4314833	Brain_Anterior_cingulate_cortex_BA24	TNFRSF18	ENSG00000186891.9	17	17	0.0779817	4.1363e-07
1_1122024_T_C_b37	rs4314833	Brain_Frontal_Cortex_BA9	TNFRSF18	ENSG00000186891.9	18	19	0.0805085	6.73843e-06
1_1122024_T_C_b37	rs4314833	Muscle_Skeletal	TNFRSF18	ENSG00000186891.9	81	89	0.0906314	1.92945e-07
1_1122024_T_C_b37	rs4314833	Thyroid	TNFRSF18	ENSG00000186891.9	80	86	0.107769	1.96711e-06
1_1122196_A_G_b37	rs4634847	Thyroid	TNFRSF18	ENSG00000186891.9	80	86	0.121469	4.12013e-05
1_1122196_A_G_b37	rs4634847	Muscle_Skeletal	TNFRSF18	ENSG00000186891.9	81	88	0.102088	2.48227e-06
1_1122196_A_G_b37	rs4634847	Brain_Cortex	TNFRSF18	ENSG00000186891.9	22	23	0.0942623	2.67516e-09
1_1122196_A_G_b37	rs4634847	Brain_Anterior_cingulate_cortex_BA24	TNFRSF18	ENSG00000186891.9	18	18	0.0891089	4.37321e-07
1_1122283_T_G_b37	rs12064046	Whole_Blood	TNFRSF18	ENSG00000186891.9	77	78	0.107143	1.97448e-06
1_1122319_C_T_b37	rs7415847	Brain_Frontal_Cortex_BA9	TNFRSF18	ENSG00000186891.9	18	19	0.0805085	6.73843e-06
1_1122319_C_T_b37	rs7415847	Brain_Anterior_cingulate_cortex_BA24	TNFRSF18	ENSG00000186891.9	17	17	0.0779817	4.1363e-07
1_1122319_C_T_b37	rs7415847	Brain_Cortex	TNFRSF18	ENSG00000186891.9	20	21	0.0772059	6.87218e-10
1_1122319_C_T_b37	rs7415847	Muscle_Skeletal	TNFRSF18	ENSG00000186891.9	78	86	0.0882957	2.54782e-07
1_1122319_C_T_b37	rs7415847	Thyroid	TNFRSF18	ENSG00000186891.9	76	82	0.103797	1.49946e-06
1_1122393_A_AT_b37	rs533697430	Brain_Frontal_Cortex_BA9	TNFRSF18	ENSG00000186891.9	21	22	0.0948276	1.43027e-06
1_1122393_A_AT_b37	rs533697430	Muscle_Skeletal	TNFRSF18	ENSG00000186891.9	76	84	0.0875	2.40847e-07
1_1122393_A_AT_b37	rs533697430	Brain_Anterior_cingulate_cortex_BA24	TNFRSF18	ENSG00000186891.9	18	18	0.0825688	6.65919e-07
1_1122393_A_AT_b37	rs533697430	Brain_Cortex	TNFRSF18	ENSG00000186891.9	22	23	0.0858209	2.16303e-09
1_1122393_A_AT_b37	rs533697430	Thyroid	TNFRSF18	ENSG00000186891.9	73	79	0.102067	3.30369e-06
1_1122516_G_A_b37	rs11260551	Brain_Frontal_Cortex_BA9	TNFRSF18	ENSG00000186891.9	17	18	0.0782609	6.73917e-06
1_1122516_G_A_b37	rs11260551	Thyroid	TNFRSF18	ENSG00000186891.9	78	84	0.106329	4.13041e-06
1_1122516_G_A_b37	rs11260551	Brain_Cortex	TNFRSF18	ENSG00000186891.9	20	21	0.0777778	8.70561e-10
1_1122516_G_A_b37	rs11260551	Muscle_Skeletal	TNFRSF18	ENSG00000186891.9	79	87	0.0893224	8.92878e-08
1_1122516_G_A_b37	rs11260551	Brain_Anterior_cingulate_cortex_BA24	TNFRSF18	ENSG00000186891.9	16	16	0.0754717	1.6223e-07
1_1122539_A_G_b37	rs12063897	Whole_Blood	TNFRSF18	ENSG00000186891.9	78	80	0.108401	1.59871e-06
1_1122915_A_G_b37	rs28595293	Esophagus_Mucosa	TNFRSF18	ENSG00000186891.9	186	229	0.320728	4.78382e-05
1_1122916_A_G_b37	rs28460227	Whole_Blood	TNFRSF18	ENSG00000186891.9	76	78	0.105691	2.97176e-06
1_1122937_G_A_b37	rs28648687	Whole_Blood	TNFRSF18	ENSG00000186891.9	76	78	0.105691	2.97176e-06
1_1123106_G_A_b37	rs12401472	Brain_Anterior_cingulate_cortex_BA24	TNFRSF18	ENSG00000186891.9	17	17	0.0779817	4.1363e-07
1_1123106_G_A_b37	rs12401472	Muscle_Skeletal	TNFRSF18	ENSG00000186891.9	81	89	0.0906314	1.92945e-07
1_1123106_G_A_b37	rs12401472	Thyroid	TNFRSF18	ENSG00000186891.9	80	86	0.107769	1.96711e-06
1_1123106_G_A_b37	rs12401472	Brain_Frontal_Cortex_BA9	TNFRSF18	ENSG00000186891.9	18	19	0.0805085	6.73843e-06
1_1123106_G_A_b37	rs12401472	Brain_Cortex	TNFRSF18	ENSG00000186891.9	20	21	0.0772059	6.87218e-10
1_1123434_T_A_b37	rs12066716	Adipose_Visceral_Omentum	TNFRSF18	ENSG00000186891.9	105	115	0.183706	2.37433e-07
1_1123434_T_A_b37	rs12066716	Nerve_Tibial	TNFRSF18	ENSG00000186891.9	128	139	0.192521	9.79051e-06
1_1123434_T_A_b37	rs12066716	Adipose_Subcutaneous	TNFRSF18	ENSG00000186891.9	135	145	0.188312	2.25633e-05
1_1123434_T_A_b37	rs12066716	Whole_Blood	TNFRSF18	ENSG00000186891.9	128	141	0.191057	1.18831e-06
1_1124257_A_G_b37	rs10907172	Brain_Frontal_Cortex_BA9	TNFRSF18	ENSG00000186891.9	18	19	0.0805085	6.73843e-06
1_1124257_A_G_b37	rs10907172	Thyroid	TNFRSF18	ENSG00000186891.9	80	86	0.107769	1.96711e-06
1_1124257_A_G_b37	rs10907172	Muscle_Skeletal	TNFRSF18	ENSG00000186891.9	81	89	0.0906314	1.92945e-07
1_1124257_A_G_b37	rs10907172	Brain_Cortex	TNFRSF18	ENSG00000186891.9	20	21	0.0772059	6.87218e-10
1_1124257_A_G_b37	rs10907172	Brain_Anterior_cingulate_cortex_BA24	TNFRSF18	ENSG00000186891.9	17	17	0.0779817	4.1363e-07
1_1124399_C_G_b37	rs10907173	Brain_Frontal_Cortex_BA9	TNFRSF18	ENSG00000186891.9	21	22	0.0940171	6.09608e-07
1_1124399_C_G_b37	rs10907173	Brain_Anterior_cingulate_cortex_BA24	TNFRSF18	ENSG00000186891.9	18	18	0.0833333	5.31708e-07
1_1124399_C_G_b37	rs10907173	Brain_Cortex	TNFRSF18	ENSG00000186891.9	22	23	0.0851852	4.92412e-10
1_1124399_C_G_b37	rs10907173	Thyroid	TNFRSF18	ENSG00000186891.9	82	88	0.110553	4.59073e-06
1_1124399_C_G_b37	rs10907173	Muscle_Skeletal	TNFRSF18	ENSG00000186891.9	84	92	0.0938776	1.06503e-07
1_1124819_C_T_b37	rs6694487	Whole_Blood	TNFRSF18	ENSG00000186891.9	78	80	0.108401	1.59871e-06
1_1124891_G_A_b37	rs61768485	Brain_Frontal_Cortex_BA9	TNFRSF18	ENSG00000186891.9	18	19	0.0805085	6.73843e-06
1_1124891_G_A_b37	rs61768485	Brain_Cortex	TNFRSF18	ENSG00000186891.9	20	21	0.0772059	6.87218e-10
1_1124891_G_A_b37	rs61768485	Brain_Anterior_cingulate_cortex_BA24	TNFRSF18	ENSG00000186891.9	17	17	0.0779817	4.1363e-07
1_1124891_G_A_b37	rs61768485	Muscle_Skeletal	TNFRSF18	ENSG00000186891.9	81	89	0.0906314	1.92945e-07
1_1124891_G_A_b37	rs61768485	Thyroid	TNFRSF18	ENSG00000186891.9	80	86	0.107769	1.96711e-06
1_1125110_T_C_b37	rs12124436	Brain_Cortex	TNFRSF18	ENSG00000186891.9	20	21	0.0772059	6.87218e-10
1_1125110_T_C_b37	rs12124436	Thyroid	TNFRSF18	ENSG00000186891.9	79	85	0.106516	1.3618e-06
1_1125110_T_C_b37	rs12124436	Muscle_Skeletal	TNFRSF18	ENSG00000186891.9	79	87	0.0885947	1.4485e-07
1_1125110_T_C_b37	rs12124436	Brain_Anterior_cingulate_cortex_BA24	TNFRSF18	ENSG00000186891.9	17	17	0.0779817	4.1363e-07
1_1125110_T_C_b37	rs12124436	Adipose_Visceral_Omentum	TNFRSF18	ENSG00000186891.9	60	64	0.102236	1.16065e-05
1_1125110_T_C_b37	rs12124436	Brain_Frontal_Cortex_BA9	TNFRSF18	ENSG00000186891.9	18	19	0.0805085	6.73843e-06
1_1125220_C_T_b37	rs12065129	Whole_Blood	TNFRSF18	ENSG00000186891.9	78	80	0.108401	1.59871e-06
1_1125348_T_C_b37	rs12029885	Brain_Anterior_cingulate_cortex_BA24	TNFRSF18	ENSG00000186891.9	18	18	0.0825688	6.65919e-07
1_1125348_T_C_b37	rs12029885	Brain_Frontal_Cortex_BA9	TNFRSF18	ENSG00000186891.9	21	22	0.0932203	6.07653e-07
1_1125348_T_C_b37	rs12029885	Brain_Cortex	TNFRSF18	ENSG00000186891.9	22	23	0.0845588	5.79066e-10
1_1125348_T_C_b37	rs12029885	Thyroid	TNFRSF18	ENSG00000186891.9	82	88	0.110276	5.2962e-06
1_1125348_T_C_b37	rs12029885	Muscle_Skeletal	TNFRSF18	ENSG00000186891.9	84	92	0.0936864	1.23747e-07
1_1125423_C_T_b37	rs139541693	Adipose_Subcutaneous	TNFRSF18	ENSG00000186891.9	70	74	0.0973684	2.35234e-06
1_1126236_G_A_b37	rs4578157	Thyroid	TNFRSF18	ENSG00000186891.9	82	88	0.111392	4.26772e-06
1_1126236_G_A_b37	rs4578157	Brain_Anterior_cingulate_cortex_BA24	TNFRSF18	ENSG00000186891.9	18	18	0.0833333	5.62503e-07
1_1126236_G_A_b37	rs4578157	Muscle_Skeletal	TNFRSF18	ENSG00000186891.9	84	92	0.0944559	1.30659e-07
1_1126236_G_A_b37	rs4578157	Brain_Frontal_Cortex_BA9	TNFRSF18	ENSG00000186891.9	21	22	0.0940171	5.75716e-07
1_1126236_G_A_b37	rs4578157	Brain_Cortex	TNFRSF18	ENSG00000186891.9	22	23	0.0858209	6.6457e-10
1_1126255_G_C_b37	rs4449971	Brain_Cortex	TNFRSF18	ENSG00000186891.9	20	21	0.0772059	6.87218e-10
1_1126255_G_C_b37	rs4449971	Thyroid	TNFRSF18	ENSG00000186891.9	80	86	0.10804	1.63846e-06
1_1126255_G_C_b37	rs4449971	Brain_Anterior_cingulate_cortex_BA24	TNFRSF18	ENSG00000186891.9	17	17	0.0779817	4.1363e-07
1_1126255_G_C_b37	rs4449971	Muscle_Skeletal	TNFRSF18	ENSG00000186891.9	81	89	0.0908163	2.15817e-07
1_1126255_G_C_b37	rs4449971	Brain_Frontal_Cortex_BA9	TNFRSF18	ENSG00000186891.9	18	19	0.0805085	6.73843e-06
1_1126994_G_A_b37	rs2094830	Brain_Anterior_cingulate_cortex_BA24	TNFRSF18	ENSG00000186891.9	18	18	0.0825688	4.79941e-06
1_1126994_G_A_b37	rs2094830	Brain_Cortex	TNFRSF18	ENSG00000186891.9	21	22	0.0808824	6.8509e-10
1_1126994_G_A_b37	rs2094830	Brain_Frontal_Cortex_BA9	TNFRSF18	ENSG00000186891.9	18	19	0.0805085	6.73843e-06
1_1126994_G_A_b37	rs2094830	Muscle_Skeletal	TNFRSF18	ENSG00000186891.9	82	90	0.0916497	1.79035e-07
1_1126994_G_A_b37	rs2094830	Thyroid	TNFRSF18	ENSG00000186891.9	80	86	0.107769	1.96711e-06
1_1127101_C_A_b37	rs9659458	Whole_Blood	TNFRSF18	ENSG00000186891.9	78	80	0.108401	1.59871e-06
1_1127137_A_C_b37	rs12062271	Whole_Blood	TNFRSF18	ENSG00000186891.9	81	83	0.112466	2.53417e-07
1_1127137_A_C_b37	rs12062271	Lung	TNFRSF18	ENSG00000186891.9	80	84	0.109661	4.50626e-05
1_1127322_G_A_b37	rs11260552	Brain_Cortex	TNFRSF18	ENSG00000186891.9	20	21	0.0772059	6.87218e-10
1_1127322_G_A_b37	rs11260552	Brain_Anterior_cingulate_cortex_BA24	TNFRSF18	ENSG00000186891.9	17	17	0.0779817	4.1363e-07
1_1127322_G_A_b37	rs11260552	Thyroid	TNFRSF18	ENSG00000186891.9	80	86	0.107769	1.96711e-06
1_1127322_G_A_b37	rs11260552	Muscle_Skeletal	TNFRSF18	ENSG00000186891.9	81	89	0.0906314	1.92945e-07
1_1127322_G_A_b37	rs11260552	Brain_Frontal_Cortex_BA9	TNFRSF18	ENSG00000186891.9	18	19	0.0805085	6.73843e-06
1_1127330_C_T_b37	rs12061357	Whole_Blood	TNFRSF18	ENSG00000186891.9	81	83	0.112466	3.90605e-07
1_1127330_C_T_b37	rs12061357	Lung	TNFRSF18	ENSG00000186891.9	83	86	0.112272	1.03455e-05
1_1127380_G_A_b37	rs11260553	Brain_Frontal_Cortex_BA9	TNFRSF18	ENSG00000186891.9	18	19	0.0805085	6.73843e-06
1_1127380_G_A_b37	rs11260553	Brain_Anterior_cingulate_cortex_BA24	TNFRSF18	ENSG00000186891.9	17	17	0.0779817	4.1363e-07
1_1127380_G_A_b37	rs11260553	Brain_Cortex	TNFRSF18	ENSG00000186891.9	20	21	0.0772059	6.87218e-10
1_1127380_G_A_b37	rs11260553	Thyroid	TNFRSF18	ENSG00000186891.9	80	86	0.107769	1.96711e-06
1_1127380_G_A_b37	rs11260553	Muscle_Skeletal	TNFRSF18	ENSG00000186891.9	81	89	0.0906314	1.92945e-07
1_1127507_G_A_b37	rs12021582	Brain_Anterior_cingulate_cortex_BA24	TNFRSF18	ENSG00000186891.9	17	17	0.0779817	4.1363e-07
1_1127507_G_A_b37	rs12021582	Brain_Frontal_Cortex_BA9	TNFRSF18	ENSG00000186891.9	18	19	0.0805085	6.73843e-06
1_1127507_G_A_b37	rs12021582	Muscle_Skeletal	TNFRSF18	ENSG00000186891.9	81	89	0.0906314	1.92945e-07
1_1127507_G_A_b37	rs12021582	Brain_Cortex	TNFRSF18	ENSG00000186891.9	20	21	0.0772059	6.87218e-10
1_1127507_G_A_b37	rs12021582	Thyroid	TNFRSF18	ENSG00000186891.9	80	86	0.107769	1.96711e-06
1_1127523_C_T_b37	rs12024296	Thyroid	TNFRSF18	ENSG00000186891.9	80	86	0.107769	1.96711e-06
1_1127523_C_T_b37	rs12024296	Brain_Cortex	TNFRSF18	ENSG00000186891.9	20	21	0.0772059	6.87218e-10
1_1127523_C_T_b37	rs12024296	Brain_Anterior_cingulate_cortex_BA24	TNFRSF18	ENSG00000186891.9	17	17	0.0779817	4.1363e-07
1_1127523_C_T_b37	rs12024296	Muscle_Skeletal	TNFRSF18	ENSG00000186891.9	81	89	0.0906314	1.92945e-07
1_1127523_C_T_b37	rs12024296	Brain_Frontal_Cortex_BA9	TNFRSF18	ENSG00000186891.9	18	19	0.0805085	6.73843e-06
1_1127608_G_GT_b37	rs138180324	Whole_Blood	TNFRSF18	ENSG00000186891.9	78	80	0.108401	1.59871e-06
1_1127681_G_A_b37	rs61768486	Brain_Frontal_Cortex_BA9	TNFRSF18	ENSG00000186891.9	17	18	0.0769231	5.3556e-06
1_1127681_G_A_b37	rs61768486	Muscle_Skeletal	TNFRSF18	ENSG00000186891.9	79	87	0.0889571	4.6298e-07
1_1127681_G_A_b37	rs61768486	Brain_Anterior_cingulate_cortex_BA24	TNFRSF18	ENSG00000186891.9	16	16	0.0740741	5.49823e-07
1_1127681_G_A_b37	rs61768486	Brain_Cortex	TNFRSF18	ENSG00000186891.9	19	20	0.0740741	1.97647e-09
1_1127681_G_A_b37	rs61768486	Thyroid	TNFRSF18	ENSG00000186891.9	78	84	0.105793	1.25769e-06
1_1128331_G_T_b37	rs61766176	Brain_Frontal_Cortex_BA9	TNFRSF18	ENSG00000186891.9	18	19	0.0805085	6.73843e-06
1_1128331_G_T_b37	rs61766176	Brain_Cortex	TNFRSF18	ENSG00000186891.9	20	21	0.0772059	6.87218e-10
1_1128331_G_T_b37	rs61766176	Thyroid	TNFRSF18	ENSG00000186891.9	80	86	0.107769	1.96711e-06
1_1128331_G_T_b37	rs61766176	Brain_Anterior_cingulate_cortex_BA24	TNFRSF18	ENSG00000186891.9	17	17	0.0779817	4.1363e-07
1_1128331_G_T_b37	rs61766176	Muscle_Skeletal	TNFRSF18	ENSG00000186891.9	81	89	0.0906314	1.92945e-07
1_1128429_G_A_b37	rs61766177	Muscle_Skeletal	TNFRSF18	ENSG00000186891.9	81	89	0.0906314	1.92945e-07
1_1128429_G_A_b37	rs61766177	Brain_Cortex	TNFRSF18	ENSG00000186891.9	20	21	0.0772059	6.87218e-10
1_1128429_G_A_b37	rs61766177	Thyroid	TNFRSF18	ENSG00000186891.9	80	86	0.107769	1.96711e-06
1_1128429_G_A_b37	rs61766177	Brain_Frontal_Cortex_BA9	TNFRSF18	ENSG00000186891.9	18	19	0.0805085	6.73843e-06
1_1128429_G_A_b37	rs61766177	Brain_Anterior_cingulate_cortex_BA24	TNFRSF18	ENSG00000186891.9	17	17	0.0779817	4.1363e-07
1_1129122_G_C_b37	rs9659213	Whole_Blood	TNFRSF18	ENSG00000186891.9	79	81	0.109756	1.43851e-06
1_1129672_G_T_b37	rs11260554	Muscle_Skeletal	TNFRSF18	ENSG00000186891.9	81	89	0.0906314	1.92945e-07
1_1129672_G_T_b37	rs11260554	Thyroid	TNFRSF18	ENSG00000186891.9	80	86	0.107769	1.96711e-06
1_1129672_G_T_b37	rs11260554	Brain_Cortex	TNFRSF18	ENSG00000186891.9	20	21	0.0772059	6.87218e-10
1_1129672_G_T_b37	rs11260554	Brain_Frontal_Cortex_BA9	TNFRSF18	ENSG00000186891.9	18	19	0.0805085	6.73843e-06
1_1129672_G_T_b37	rs11260554	Brain_Anterior_cingulate_cortex_BA24	TNFRSF18	ENSG00000186891.9	17	17	0.0779817	4.1363e-07
1_1129707_A_G_b37	rs11260555	Thyroid	TNFRSF18	ENSG00000186891.9	80	86	0.107769	1.96711e-06
1_1129707_A_G_b37	rs11260555	Brain_Frontal_Cortex_BA9	TNFRSF18	ENSG00000186891.9	18	19	0.0805085	6.73843e-06
1_1129707_A_G_b37	rs11260555	Brain_Anterior_cingulate_cortex_BA24	TNFRSF18	ENSG00000186891.9	17	17	0.0779817	4.1363e-07
1_1129707_A_G_b37	rs11260555	Muscle_Skeletal	TNFRSF18	ENSG00000186891.9	81	89	0.0906314	1.92945e-07
1_1129707_A_G_b37	rs11260555	Brain_Cortex	TNFRSF18	ENSG00000186891.9	20	21	0.0772059	6.87218e-10
1_1129789_G_C_b37	rs12060374	Whole_Blood	TNFRSF18	ENSG00000186891.9	78	80	0.108401	1.59871e-06
1_1129920_G_A_b37	rs12060422	Whole_Blood	TNFRSF18	ENSG00000186891.9	78	80	0.108401	1.59871e-06
1_1130093_C_T_b37	rs12026524	Adipose_Visceral_Omentum	TNFRSF18	ENSG00000186891.9	63	67	0.107029	2.77003e-05
1_1130093_C_T_b37	rs12026524	Thyroid	TNFRSF18	ENSG00000186891.9	81	87	0.109023	2.24637e-06
1_1130093_C_T_b37	rs12026524	Brain_Frontal_Cortex_BA9	TNFRSF18	ENSG00000186891.9	19	20	0.0847458	2.59594e-06
1_1130093_C_T_b37	rs12026524	Brain_Anterior_cingulate_cortex_BA24	TNFRSF18	ENSG00000186891.9	18	18	0.0825688	4.31778e-08
1_1130093_C_T_b37	rs12026524	Muscle_Skeletal	TNFRSF18	ENSG00000186891.9	81	89	0.0906314	1.92945e-07
1_1130093_C_T_b37	rs12026524	Brain_Cortex	TNFRSF18	ENSG00000186891.9	21	22	0.0808824	2.58459e-10
1_1130480_G_A_b37	rs9659772	Muscle_Skeletal	TNFRSF18	ENSG00000186891.9	86	95	0.0969388	2.0484e-07
1_1130480_G_A_b37	rs9659772	Brain_Anterior_cingulate_cortex_BA24	TNFRSF18	ENSG00000186891.9	19	19	0.087963	1.66932e-07
1_1130480_G_A_b37	rs9659772	Thyroid	TNFRSF18	ENSG00000186891.9	86	93	0.116541	3.14457e-05
1_1130480_G_A_b37	rs9659772	Brain_Cortex	TNFRSF18	ENSG00000186891.9	23	24	0.0882353	5.14605e-09
1_1130480_G_A_b37	rs9659772	Brain_Frontal_Cortex_BA9	TNFRSF18	ENSG00000186891.9	21	22	0.0940171	1.90217e-05
1_1130660_C_T_b37	rs9727211	Adipose_Subcutaneous	TNFRSF18	ENSG00000186891.9	63	67	0.087013	6.86068e-06
1_1130727_A_C_b37	rs10907175	Whole_Blood	TNFRSF18	ENSG00000186891.9	78	80	0.108696	1.75978e-06
1_1130855_T_C_b37	rs10907176	Whole_Blood	TNFRSF18	ENSG00000186891.9	73	75	0.103306	1.38629e-06
1_1131052_C_T_b37	rs12066103	Whole_Blood	TNFRSF18	ENSG00000186891.9	78	80	0.108401	1.59871e-06
1_1131236_G_T_b37	rs12062042	Whole_Blood	TNFRSF18	ENSG00000186891.9	43	44	0.0658683	3.36176e-05
1_1131441_C_T_b37	rs12403745	Adipose_Visceral_Omentum	TNFRSF18	ENSG00000186891.9	58	62	0.1	1.1667e-05
1_1131441_C_T_b37	rs12403745	Brain_Frontal_Cortex_BA9	TNFRSF18	ENSG00000186891.9	18	19	0.0811966	1.06459e-06
1_1131441_C_T_b37	rs12403745	Muscle_Skeletal	TNFRSF18	ENSG00000186891.9	74	82	0.0843621	6.46207e-07
1_1131441_C_T_b37	rs12403745	Brain_Anterior_cingulate_cortex_BA24	TNFRSF18	ENSG00000186891.9	17	17	0.0787037	2.60512e-08
1_1131441_C_T_b37	rs12403745	Brain_Cortex	TNFRSF18	ENSG00000186891.9	20	21	0.0777778	2.37227e-11
1_1131441_C_T_b37	rs12403745	Thyroid	TNFRSF18	ENSG00000186891.9	75	81	0.102792	1.51896e-07
1_1132938_G_A_b37	rs2274791	Brain_Anterior_cingulate_cortex_BA24	TNFRSF18	ENSG00000186891.9	18	18	0.0825688	4.31778e-08
1_1132938_G_A_b37	rs2274791	Adipose_Visceral_Omentum	TNFRSF18	ENSG00000186891.9	60	64	0.102564	2.07404e-05
1_1132938_G_A_b37	rs2274791	Muscle_Skeletal	TNFRSF18	ENSG00000186891.9	76	84	0.0860656	6.05971e-08
1_1132938_G_A_b37	rs2274791	Brain_Cortex	TNFRSF18	ENSG00000186891.9	20	21	0.0772059	4.47034e-11
1_1132938_G_A_b37	rs2274791	Brain_Frontal_Cortex_BA9	TNFRSF18	ENSG00000186891.9	18	19	0.0805085	1.58922e-06
1_1132938_G_A_b37	rs2274791	Thyroid	TNFRSF18	ENSG00000186891.9	77	83	0.104271	9.06955e-07
1_1132966_C_A_b37	rs2274790	Brain_Anterior_cingulate_cortex_BA24	TNFRSF18	ENSG00000186891.9	18	18	0.0825688	4.31778e-08
1_1132966_C_A_b37	rs2274790	Thyroid	TNFRSF18	ENSG00000186891.9	78	84	0.106061	1.90433e-06
1_1132966_C_A_b37	rs2274790	Brain_Frontal_Cortex_BA9	TNFRSF18	ENSG00000186891.9	18	19	0.0805085	1.58922e-06
1_1132966_C_A_b37	rs2274790	Muscle_Skeletal	TNFRSF18	ENSG00000186891.9	78	86	0.0881148	1.22853e-07
1_1132966_C_A_b37	rs2274790	Brain_Cortex	TNFRSF18	ENSG00000186891.9	20	21	0.0772059	4.47034e-11
1_1133254_G_A_b37	rs12026794	Brain_Frontal_Cortex_BA9	TNFRSF18	ENSG00000186891.9	18	19	0.0805085	1.58922e-06
1_1133254_G_A_b37	rs12026794	Brain_Cortex	TNFRSF18	ENSG00000186891.9	20	21	0.0772059	4.47034e-11
1_1133254_G_A_b37	rs12026794	Thyroid	TNFRSF18	ENSG00000186891.9	79	85	0.106516	1.37007e-06
1_1133254_G_A_b37	rs12026794	Muscle_Skeletal	TNFRSF18	ENSG00000186891.9	79	87	0.0887755	5.62392e-08
1_1133254_G_A_b37	rs12026794	Brain_Anterior_cingulate_cortex_BA24	TNFRSF18	ENSG00000186891.9	18	18	0.0825688	4.31778e-08
1_1134633_C_T_b37	rs11260558	Brain_Frontal_Cortex_BA9	TNFRSF18	ENSG00000186891.9	25	27	0.114407	6.50974e-06
1_1134633_C_T_b37	rs11260558	Muscle_Skeletal	TNFRSF18	ENSG00000186891.9	98	107	0.108961	7.33821e-07
1_1134633_C_T_b37	rs11260558	Brain_Cortex	TNFRSF18	ENSG00000186891.9	26	27	0.0992647	1.76876e-08
1_1134707_G_A_b37	rs9727747	Thyroid	TNFRSF18	ENSG00000186891.9	79	85	0.106516	1.37007e-06
1_1134707_G_A_b37	rs9727747	Brain_Cortex	TNFRSF18	ENSG00000186891.9	20	21	0.0772059	4.47034e-11
1_1134707_G_A_b37	rs9727747	Brain_Frontal_Cortex_BA9	TNFRSF18	ENSG00000186891.9	18	19	0.0805085	1.58922e-06
1_1134707_G_A_b37	rs9727747	Muscle_Skeletal	TNFRSF18	ENSG00000186891.9	79	87	0.0885947	5.59663e-08
1_1134707_G_A_b37	rs9727747	Brain_Anterior_cingulate_cortex_BA24	TNFRSF18	ENSG00000186891.9	18	18	0.0825688	4.31778e-08
1_1136753_T_C_b37	rs186608774	Adipose_Visceral_Omentum	TNFRSF18	ENSG00000186891.9	113	132	0.219269	1.65323e-09
1_1136753_T_C_b37	rs186608774	Lung	TNFRSF18	ENSG00000186891.9	134	153	0.20788	2.63675e-08
1_1136753_T_C_b37	rs186608774	Nerve_Tibial	TNFRSF18	ENSG00000186891.9	133	154	0.225806	3.16735e-09
1_1136753_T_C_b37	rs186608774	Spleen	TNFRSF18	ENSG00000186891.9	56	68	0.246377	1.19764e-05
1_1136753_T_C_b37	rs186608774	Whole_Blood	TNFRSF18	ENSG00000186891.9	134	151	0.2151	4.51225e-11
1_1136753_T_C_b37	rs186608774	Thyroid	TNFRSF18	ENSG00000186891.9	141	165	0.216535	1.79912e-08
1_1136753_T_C_b37	rs186608774	Esophagus_Mucosa	TNFRSF18	ENSG00000186891.9	131	150	0.218659	2.75175e-05
1_1136753_T_C_b37	rs186608774	Adipose_Subcutaneous	TNFRSF18	ENSG00000186891.9	144	162	0.220109	5.35814e-08
1_1138285_C_G_b37	rs74508499	Nerve_Tibial	TNFRSF18	ENSG00000186891.9	89	94	0.130194	4.13643e-06
1_1138285_C_G_b37	rs74508499	Lung	TNFRSF18	ENSG00000186891.9	80	83	0.108355	4.05774e-07
1_1138285_C_G_b37	rs74508499	Whole_Blood	TNFRSF18	ENSG00000186891.9	81	84	0.113821	3.42001e-07
1_1138735_C_G_b37	rs11466698	Adipose_Subcutaneous	TNFRSF18	ENSG00000186891.9	47	49	0.0636364	8.7512e-06
1_1138913_T_C_b37	rs3819001	Adipose_Subcutaneous	TNFRSF18	ENSG00000186891.9	65	74	0.0961039	1.85721e-06
1_1138913_T_C_b37	rs3819001	Adipose_Visceral_Omentum	TNFRSF18	ENSG00000186891.9	55	65	0.103834	2.11212e-06
1_1138913_T_C_b37	rs3819001	Thyroid	TNFRSF18	ENSG00000186891.9	71	84	0.105263	2.47601e-06
1_1138913_T_C_b37	rs3819001	Skin_Sun_Exposed_Lower_leg	TNFRSF18	ENSG00000186891.9	72	83	0.100242	7.48215e-06
1_1139202_T_C_b37	rs2298213	Adipose_Subcutaneous	TNFRSF18	ENSG00000186891.9	68	77	0.1	4.42521e-07
1_1139202_T_C_b37	rs2298213	Thyroid	TNFRSF18	ENSG00000186891.9	74	87	0.109023	4.55405e-06
1_1139202_T_C_b37	rs2298213	Adipose_Visceral_Omentum	TNFRSF18	ENSG00000186891.9	56	66	0.105431	6.77626e-06
1_1139202_T_C_b37	rs2298213	Skin_Sun_Exposed_Lower_leg	TNFRSF18	ENSG00000186891.9	74	85	0.102657	2.22857e-05
1_1140290_T_C_b37	rs57260149	Thyroid	TNFRSF18	ENSG00000186891.9	54	58	0.0726817	5.1576e-05
1_1140504_T_C_b37	rs4081335	Adipose_Subcutaneous	TNFRSF18	ENSG00000186891.9	48	49	0.0636364	4.31112e-05
1_1141556_G_C_b37	rs11466679	Thyroid	TNFRSF18	ENSG00000186891.9	52	56	0.071066	2.97623e-06
1_1141556_G_C_b37	rs11466679	Adipose_Subcutaneous	TNFRSF18	ENSG00000186891.9	50	52	0.0684211	3.04395e-05
1_1141723_A_G_b37	rs11466678	Adipose_Subcutaneous	TNFRSF18	ENSG00000186891.9	49	51	0.0662338	3.64254e-05
1_1141723_A_G_b37	rs11466678	Thyroid	TNFRSF18	ENSG00000186891.9	51	55	0.0689223	4.00944e-06
1_1142150_G_A_b37	rs3753344	Thyroid	TNFRSF18	ENSG00000186891.9	51	55	0.0689223	6.12472e-06
1_1143179_AG_A_b37	rs397825100	Adipose_Subcutaneous	TNFRSF18	ENSG00000186891.9	43	45	0.0585938	7.18061e-06
1_1143418_T_C_b37	rs11466665	Adipose_Visceral_Omentum	TNFRSF18	ENSG00000186891.9	59	69	0.110224	9.0895e-06
1_1144499_GGA_G_b37	rs113462398	Lung	TNFRSF18	ENSG00000186891.9	66	68	0.0887728	5.95878e-08
1_1144499_GGA_G_b37	rs113462398	Nerve_Tibial	TNFRSF18	ENSG00000186891.9	71	75	0.103878	4.90907e-05
1_1144499_GGA_G_b37	rs113462398	Whole_Blood	TNFRSF18	ENSG00000186891.9	67	70	0.0948509	9.91556e-08
1_1144499_GGA_G_b37	rs113462398	Brain_Cerebellum	TNFRSF18	ENSG00000186891.9	37	39	0.126623	7.7435e-06
1_1144499_GGA_G_b37	rs113462398	Adipose_Visceral_Omentum	TNFRSF18	ENSG00000186891.9	52	54	0.086262	1.73929e-05
1_1144653_G_A_b37	rs78021605	Nerve_Tibial	TNFRSF18	ENSG00000186891.9	71	75	0.103878	4.90907e-05
1_1144653_G_A_b37	rs78021605	Lung	TNFRSF18	ENSG00000186891.9	65	67	0.0876963	1.59953e-07
1_1144653_G_A_b37	rs78021605	Adipose_Visceral_Omentum	TNFRSF18	ENSG00000186891.9	52	54	0.086262	1.73929e-05
1_1144653_G_A_b37	rs78021605	Whole_Blood	TNFRSF18	ENSG00000186891.9	66	69	0.09375	9.3191e-07
1_1144653_G_A_b37	rs78021605	Brain_Cerebellum	TNFRSF18	ENSG00000186891.9	37	39	0.126623	7.7435e-06
1_1144696_T_C_b37	rs111842318	Lung	TNFRSF18	ENSG00000186891.9	66	68	0.0887728	5.95878e-08
1_1144696_T_C_b37	rs111842318	Nerve_Tibial	TNFRSF18	ENSG00000186891.9	71	75	0.103878	4.90907e-05
1_1144696_T_C_b37	rs111842318	Adipose_Visceral_Omentum	TNFRSF18	ENSG00000186891.9	52	54	0.086262	1.73929e-05
1_1144696_T_C_b37	rs111842318	Brain_Cerebellum	TNFRSF18	ENSG00000186891.9	37	39	0.126623	7.7435e-06
1_1144696_T_C_b37	rs111842318	Whole_Blood	TNFRSF18	ENSG00000186891.9	67	70	0.0948509	9.91556e-08
1_1145411_G_A_b37	rs36057244	Whole_Blood	TNFRSF18	ENSG00000186891.9	66	68	0.0923913	1.22016e-07
1_1145411_G_A_b37	rs36057244	Brain_Cerebellum	TNFRSF18	ENSG00000186891.9	37	39	0.126623	7.7435e-06
1_1145411_G_A_b37	rs36057244	Thyroid	TNFRSF18	ENSG00000186891.9	68	70	0.0879397	3.92736e-05
1_1145411_G_A_b37	rs36057244	Adipose_Visceral_Omentum	TNFRSF18	ENSG00000186891.9	52	54	0.086262	1.73929e-05
1_1145411_G_A_b37	rs36057244	Lung	TNFRSF18	ENSG00000186891.9	66	68	0.0887728	5.95878e-08
1_1145441_A_G_b37	rs35916760	Whole_Blood	TNFRSF18	ENSG00000186891.9	66	69	0.0942623	2.07426e-07
1_1145441_A_G_b37	rs35916760	Lung	TNFRSF18	ENSG00000186891.9	66	68	0.0890052	5.77697e-08
1_1145441_A_G_b37	rs35916760	Brain_Cerebellum	TNFRSF18	ENSG00000186891.9	37	39	0.126623	7.7435e-06
1_1145441_A_G_b37	rs35916760	Thyroid	TNFRSF18	ENSG00000186891.9	68	70	0.0881612	3.57292e-05
1_1145441_A_G_b37	rs35916760	Adipose_Visceral_Omentum	TNFRSF18	ENSG00000186891.9	52	54	0.0865385	1.73419e-05
1_1145467_C_G_b37	rs34279802	Lung	TNFRSF18	ENSG00000186891.9	66	68	0.0890052	6.31214e-08
1_1145467_C_G_b37	rs34279802	Brain_Cerebellum	TNFRSF18	ENSG00000186891.9	37	39	0.127451	7.79575e-06
1_1145467_C_G_b37	rs34279802	Whole_Blood	TNFRSF18	ENSG00000186891.9	67	71	0.0964674	2.03942e-07
1_1145467_C_G_b37	rs34279802	Nerve_Tibial	TNFRSF18	ENSG00000186891.9	71	76	0.10585	2.73035e-05
1_1145467_C_G_b37	rs34279802	Adipose_Visceral_Omentum	TNFRSF18	ENSG00000186891.9	52	54	0.0868167	1.69814e-05
1_1145766_C_G_b37	rs34067070	Whole_Blood	TNFRSF18	ENSG00000186891.9	67	70	0.0948509	9.91556e-08
1_1145766_C_G_b37	rs34067070	Brain_Cerebellum	TNFRSF18	ENSG00000186891.9	37	39	0.126623	7.7435e-06
1_1145766_C_G_b37	rs34067070	Lung	TNFRSF18	ENSG00000186891.9	66	68	0.0887728	5.95878e-08
1_1145766_C_G_b37	rs34067070	Adipose_Visceral_Omentum	TNFRSF18	ENSG00000186891.9	52	54	0.086262	1.73929e-05
1_1145766_C_G_b37	rs34067070	Nerve_Tibial	TNFRSF18	ENSG00000186891.9	71	75	0.103878	4.90907e-05
1_1147243_A_C_b37	rs2298211	Lung	TNFRSF18	ENSG00000186891.9	67	69	0.0900783	3.19692e-08
1_1147243_A_C_b37	rs2298211	Brain_Cerebellum	TNFRSF18	ENSG00000186891.9	38	40	0.12987	1.14275e-06
1_1147243_A_C_b37	rs2298211	Adipose_Visceral_Omentum	TNFRSF18	ENSG00000186891.9	53	55	0.0878594	1.50164e-05
1_1147243_A_C_b37	rs2298211	Whole_Blood	TNFRSF18	ENSG00000186891.9	68	71	0.096206	6.40174e-08
1_1147297_G_A_b37	rs2298212	Brain_Cerebellum	TNFRSF18	ENSG00000186891.9	38	40	0.12987	1.14275e-06
1_1147297_G_A_b37	rs2298212	Nerve_Tibial	TNFRSF18	ENSG00000186891.9	72	77	0.106648	3.84142e-05
1_1147297_G_A_b37	rs2298212	Lung	TNFRSF18	ENSG00000186891.9	67	69	0.0900783	3.19692e-08
1_1147297_G_A_b37	rs2298212	Whole_Blood	TNFRSF18	ENSG00000186891.9	68	72	0.097561	1.13318e-07
1_1147297_G_A_b37	rs2298212	Adipose_Visceral_Omentum	TNFRSF18	ENSG00000186891.9	53	55	0.0878594	1.50164e-05
1_1147770_G_A_b37	rs9661697	Brain_Cerebellum	TNFRSF18	ENSG00000186891.9	37	39	0.126623	6.58442e-07
1_1147770_G_A_b37	rs9661697	Whole_Blood	TNFRSF18	ENSG00000186891.9	67	71	0.096206	1.64062e-07
1_1147770_G_A_b37	rs9661697	Adipose_Visceral_Omentum	TNFRSF18	ENSG00000186891.9	52	54	0.086262	2.31934e-05
1_1147770_G_A_b37	rs9661697	Lung	TNFRSF18	ENSG00000186891.9	66	68	0.0887728	3.59348e-08
1_1150037_T_C_b37	rs35107976	Adipose_Subcutaneous	TNFRSF18	ENSG00000186891.9	44	45	0.0584416	1.13689e-05
1_1150181_G_C_b37	rs35659545	Nerve_Tibial	TNFRSF18	ENSG00000186891.9	71	76	0.105556	1.20229e-05
1_1150181_G_C_b37	rs35659545	Whole_Blood	TNFRSF18	ENSG00000186891.9	68	72	0.0978261	5.60541e-09
1_1150181_G_C_b37	rs35659545	Lung	TNFRSF18	ENSG00000186891.9	63	65	0.0850785	1.33425e-06
1_1150181_G_C_b37	rs35659545	Brain_Cerebellum	TNFRSF18	ENSG00000186891.9	39	41	0.133117	2.14922e-07
1_1150448_T_C_b37	rs34115518	Adipose_Visceral_Omentum	TNFRSF18	ENSG00000186891.9	53	55	0.0878594	2.98991e-05
1_1150448_T_C_b37	rs34115518	Brain_Cerebellum	TNFRSF18	ENSG00000186891.9	39	41	0.133117	2.14922e-07
1_1150448_T_C_b37	rs34115518	Nerve_Tibial	TNFRSF18	ENSG00000186891.9	71	76	0.105263	1.48619e-05
1_1150448_T_C_b37	rs34115518	Lung	TNFRSF18	ENSG00000186891.9	64	66	0.0861619	6.84981e-07
1_1150448_T_C_b37	rs34115518	Whole_Blood	TNFRSF18	ENSG00000186891.9	68	72	0.097561	1.03274e-08
1_1151232_T_C_b37	rs3813201	Adipose_Visceral_Omentum	TNFRSF18	ENSG00000186891.9	102	113	0.180511	3.97146e-07
1_1151232_T_C_b37	rs3813201	Lung	TNFRSF18	ENSG00000186891.9	116	129	0.168407	6.93298e-07
1_1151232_T_C_b37	rs3813201	Nerve_Tibial	TNFRSF18	ENSG00000186891.9	122	136	0.188366	1.32289e-05
1_1151232_T_C_b37	rs3813201	Thyroid	TNFRSF18	ENSG00000186891.9	129	144	0.180451	7.05382e-07
1_1151232_T_C_b37	rs3813201	Adipose_Subcutaneous	TNFRSF18	ENSG00000186891.9	133	147	0.190909	1.98849e-08
1_1151232_T_C_b37	rs3813201	Brain_Cerebellum	TNFRSF18	ENSG00000186891.9	59	64	0.207792	2.02431e-06
1_1151232_T_C_b37	rs3813201	Whole_Blood	TNFRSF18	ENSG00000186891.9	118	130	0.176152	2.09193e-11
1_1151973_G_C_b37	rs75972122	Adipose_Visceral_Omentum	TNFRSF18	ENSG00000186891.9	99	107	0.170927	7.64864e-07
1_1151973_G_C_b37	rs75972122	Adipose_Subcutaneous	TNFRSF18	ENSG00000186891.9	131	139	0.180519	1.95444e-08
1_1151973_G_C_b37	rs75972122	Lung	TNFRSF18	ENSG00000186891.9	114	123	0.160574	4.64334e-06
1_1151973_G_C_b37	rs75972122	Whole_Blood	TNFRSF18	ENSG00000186891.9	113	122	0.165312	2.95536e-10
1_1151973_G_C_b37	rs75972122	Brain_Cerebellum	TNFRSF18	ENSG00000186891.9	57	61	0.198052	5.9269e-07
1_1151973_G_C_b37	rs75972122	Thyroid	TNFRSF18	ENSG00000186891.9	126	137	0.171679	5.68918e-07
1_1151973_G_C_b37	rs75972122	Nerve_Tibial	TNFRSF18	ENSG00000186891.9	119	129	0.17867	3.26797e-05
1_1152088_CT_C_b37	rs111818913	Brain_Cerebellum	TNFRSF18	ENSG00000186891.9	43	45	0.153061	2.59364e-06
1_1152088_CT_C_b37	rs111818913	Lung	TNFRSF18	ENSG00000186891.9	67	69	0.0971831	2.87211e-06
1_1152088_CT_C_b37	rs111818913	Whole_Blood	TNFRSF18	ENSG00000186891.9	69	71	0.104412	6.4026e-10
1_1152088_CT_C_b37	rs111818913	Nerve_Tibial	TNFRSF18	ENSG00000186891.9	76	79	0.11756	4.96481e-05
1_1152631_C_A_b37	rs11721	Whole_Blood	TNFRSF18	ENSG00000186891.9	69	71	0.0967302	1.51288e-09
1_1152631_C_A_b37	rs11721	Lung	TNFRSF18	ENSG00000186891.9	74	79	0.103403	2.55249e-07
1_1152631_C_A_b37	rs11721	Adipose_Subcutaneous	TNFRSF18	ENSG00000186891.9	80	86	0.112272	1.05714e-05
1_1152631_C_A_b37	rs11721	Adipose_Visceral_Omentum	TNFRSF18	ENSG00000186891.9	61	65	0.104167	4.26967e-06
1_1153113_G_A_b37	rs12036216	Adipose_Subcutaneous	TNFRSF18	ENSG00000186891.9	93	96	0.124675	3.26328e-06
1_1153113_G_A_b37	rs12036216	Nerve_Tibial	TNFRSF18	ENSG00000186891.9	90	95	0.131579	2.82254e-06
1_1153113_G_A_b37	rs12036216	Brain_Cerebellum	TNFRSF18	ENSG00000186891.9	48	51	0.165584	3.45251e-08
1_1153113_G_A_b37	rs12036216	Adipose_Visceral_Omentum	TNFRSF18	ENSG00000186891.9	68	71	0.113419	3.61772e-07
1_1153113_G_A_b37	rs12036216	Whole_Blood	TNFRSF18	ENSG00000186891.9	81	84	0.113821	1.71107e-11
1_1153113_G_A_b37	rs12036216	Lung	TNFRSF18	ENSG00000186891.9	81	84	0.109661	2.85263e-06
1_1153113_G_A_b37	rs12036216	Thyroid	TNFRSF18	ENSG00000186891.9	92	96	0.120301	4.73969e-07
1_1154539_G_A_b37	rs9659553	Nerve_Tibial	TNFRSF18	ENSG00000186891.9	69	72	0.099723	7.06677e-06
1_1154539_G_A_b37	rs9659553	Brain_Cerebellum	TNFRSF18	ENSG00000186891.9	39	41	0.133117	2.14922e-07
1_1154539_G_A_b37	rs9659553	Adipose_Visceral_Omentum	TNFRSF18	ENSG00000186891.9	52	54	0.086262	1.20448e-05
1_1154539_G_A_b37	rs9659553	Whole_Blood	TNFRSF18	ENSG00000186891.9	65	67	0.0907859	7.62088e-10
1_1154539_G_A_b37	rs9659553	Lung	TNFRSF18	ENSG00000186891.9	62	64	0.0835509	6.81432e-07
1_1154539_G_A_b37	rs9659553	Thyroid	TNFRSF18	ENSG00000186891.9	68	70	0.0877193	4.9466e-05
1_1155238_G_A_b37	rs12134035	Whole_Blood	TNFRSF18	ENSG00000186891.9	115	122	0.165312	1.69326e-07
1_1155321_C_T_b37	rs79501625	Lung	TNFRSF18	ENSG00000186891.9	63	66	0.0861619	2.60511e-05
1_1155321_C_T_b37	rs79501625	Whole_Blood	TNFRSF18	ENSG00000186891.9	57	59	0.0799458	2.46275e-09
1_1155321_C_T_b37	rs79501625	Brain_Cerebellum	TNFRSF18	ENSG00000186891.9	36	38	0.123377	4.92042e-06
1_1156429_C_G_b37	rs944369	Whole_Blood	TNFRSF18	ENSG00000186891.9	188	235	0.318428	7.52554e-07
1_1156429_C_G_b37	rs944369	Adipose_Visceral_Omentum	TNFRSF18	ENSG00000186891.9	155	192	0.306709	3.87819e-07
1_1156429_C_G_b37	rs944369	Adipose_Subcutaneous	TNFRSF18	ENSG00000186891.9	205	257	0.333766	1.28371e-06
1_1156655_G_A_b37	rs75998592	Brain_Cerebellum	TNFRSF18	ENSG00000186891.9	47	49	0.159091	3.49225e-06
1_1156655_G_A_b37	rs75998592	Lung	TNFRSF18	ENSG00000186891.9	83	85	0.110966	9.04865e-06
1_1156655_G_A_b37	rs75998592	Whole_Blood	TNFRSF18	ENSG00000186891.9	79	81	0.109756	8.85764e-10
1_1156735_T_C_b37	rs79361728	Lung	TNFRSF18	ENSG00000186891.9	83	85	0.110966	9.04865e-06
1_1156735_T_C_b37	rs79361728	Brain_Cerebellum	TNFRSF18	ENSG00000186891.9	47	49	0.159091	3.49225e-06
1_1156735_T_C_b37	rs79361728	Whole_Blood	TNFRSF18	ENSG00000186891.9	79	81	0.109756	8.85764e-10
1_1157340_A_G_b37	rs56013947	Whole_Blood	TNFRSF18	ENSG00000186891.9	84	87	0.117886	1.16059e-10
1_1157340_A_G_b37	rs56013947	Brain_Cerebellum	TNFRSF18	ENSG00000186891.9	50	52	0.168831	1.16983e-06
1_1157340_A_G_b37	rs56013947	Lung	TNFRSF18	ENSG00000186891.9	84	87	0.113577	2.22853e-06
1_1157372_G_A_b37	rs55683245	Whole_Blood	TNFRSF18	ENSG00000186891.9	84	87	0.117886	1.16059e-10
1_1157372_G_A_b37	rs55683245	Lung	TNFRSF18	ENSG00000186891.9	84	87	0.113577	2.22853e-06
1_1157372_G_A_b37	rs55683245	Brain_Cerebellum	TNFRSF18	ENSG00000186891.9	50	52	0.168831	1.16983e-06
1_1157547_T_C_b37	rs79118541	Whole_Blood	TNFRSF18	ENSG00000186891.9	84	87	0.117886	1.16059e-10
1_1157547_T_C_b37	rs79118541	Lung	TNFRSF18	ENSG00000186891.9	84	87	0.113577	2.22853e-06
1_1157547_T_C_b37	rs79118541	Brain_Cerebellum	TNFRSF18	ENSG00000186891.9	50	52	0.168831	1.16983e-06
1_1157564_G_A_b37	rs75124586	Brain_Cerebellum	TNFRSF18	ENSG00000186891.9	50	52	0.168831	1.16983e-06
1_1157564_G_A_b37	rs75124586	Lung	TNFRSF18	ENSG00000186891.9	84	87	0.113577	2.22853e-06
1_1157564_G_A_b37	rs75124586	Whole_Blood	TNFRSF18	ENSG00000186891.9	84	87	0.117886	1.16059e-10
1_1157625_C_T_b37	rs74374908	Lung	TNFRSF18	ENSG00000186891.9	84	87	0.113577	2.22853e-06
1_1157625_C_T_b37	rs74374908	Whole_Blood	TNFRSF18	ENSG00000186891.9	84	87	0.117886	1.16059e-10
1_1157625_C_T_b37	rs74374908	Brain_Cerebellum	TNFRSF18	ENSG00000186891.9	50	52	0.168831	1.16983e-06
1_1157631_G_A_b37	rs79875872	Lung	TNFRSF18	ENSG00000186891.9	85	88	0.114883	2.23316e-06
1_1157631_G_A_b37	rs79875872	Brain_Cerebellum	TNFRSF18	ENSG00000186891.9	50	52	0.168831	1.16983e-06
1_1157631_G_A_b37	rs79875872	Whole_Blood	TNFRSF18	ENSG00000186891.9	85	88	0.119241	2.94485e-10
1_1157684_C_T_b37	rs79281810	Whole_Blood	TNFRSF18	ENSG00000186891.9	84	87	0.117886	1.16059e-10
1_1157684_C_T_b37	rs79281810	Lung	TNFRSF18	ENSG00000186891.9	84	87	0.113577	2.22853e-06
1_1157684_C_T_b37	rs79281810	Brain_Cerebellum	TNFRSF18	ENSG00000186891.9	50	52	0.168831	1.16983e-06
1_1157705_C_G_b37	rs79339398	Lung	TNFRSF18	ENSG00000186891.9	84	87	0.113577	2.22853e-06
1_1157705_C_G_b37	rs79339398	Brain_Cerebellum	TNFRSF18	ENSG00000186891.9	50	52	0.168831	1.16983e-06
1_1157705_C_G_b37	rs79339398	Whole_Blood	TNFRSF18	ENSG00000186891.9	84	87	0.117886	1.16059e-10
1_1157834_C_T_b37	rs79561057	Lung	TNFRSF18	ENSG00000186891.9	84	87	0.113577	2.22853e-06
1_1157834_C_T_b37	rs79561057	Brain_Cerebellum	TNFRSF18	ENSG00000186891.9	50	52	0.168831	1.16983e-06
1_1157834_C_T_b37	rs79561057	Whole_Blood	TNFRSF18	ENSG00000186891.9	84	87	0.117886	1.16059e-10
1_1157862_C_T_b37	rs78596995	Lung	TNFRSF18	ENSG00000186891.9	84	87	0.113577	2.22853e-06
1_1157862_C_T_b37	rs78596995	Whole_Blood	TNFRSF18	ENSG00000186891.9	84	87	0.117886	1.16059e-10
1_1157862_C_T_b37	rs78596995	Brain_Cerebellum	TNFRSF18	ENSG00000186891.9	50	52	0.168831	1.16983e-06
1_1157959_C_T_b37	rs76502131	Brain_Cerebellum	TNFRSF18	ENSG00000186891.9	50	52	0.168831	1.16983e-06
1_1157959_C_T_b37	rs76502131	Whole_Blood	TNFRSF18	ENSG00000186891.9	84	87	0.117886	1.16059e-10
1_1157959_C_T_b37	rs76502131	Lung	TNFRSF18	ENSG00000186891.9	84	87	0.113577	2.22853e-06
1_1157960_T_C_b37	rs74350546	Lung	TNFRSF18	ENSG00000186891.9	84	88	0.114883	2.42388e-06
1_1157960_T_C_b37	rs74350546	Whole_Blood	TNFRSF18	ENSG00000186891.9	84	88	0.119241	4.51172e-11
1_1157960_T_C_b37	rs74350546	Brain_Cerebellum	TNFRSF18	ENSG00000186891.9	50	53	0.172078	1.64839e-06
1_1157974_A_G_b37	rs76056412	Whole_Blood	TNFRSF18	ENSG00000186891.9	84	88	0.119241	4.51172e-11
1_1157974_A_G_b37	rs76056412	Lung	TNFRSF18	ENSG00000186891.9	84	88	0.114883	2.42388e-06
1_1157974_A_G_b37	rs76056412	Brain_Cerebellum	TNFRSF18	ENSG00000186891.9	50	53	0.172078	1.64839e-06
1_1157991_G_A_b37	rs74930764	Whole_Blood	TNFRSF18	ENSG00000186891.9	84	87	0.117886	1.16059e-10
1_1157991_G_A_b37	rs74930764	Brain_Cerebellum	TNFRSF18	ENSG00000186891.9	50	52	0.168831	1.16983e-06
1_1157991_G_A_b37	rs74930764	Lung	TNFRSF18	ENSG00000186891.9	84	87	0.113577	2.22853e-06
1_1158020_A_C_b37	rs112678550	Whole_Blood	TNFRSF18	ENSG00000186891.9	84	87	0.117886	1.16059e-10
1_1158020_A_C_b37	rs112678550	Lung	TNFRSF18	ENSG00000186891.9	84	87	0.113577	2.22853e-06
1_1158020_A_C_b37	rs112678550	Brain_Cerebellum	TNFRSF18	ENSG00000186891.9	50	52	0.168831	1.16983e-06
1_1158277_G_A_b37	rs3813199	Brain_Cerebellum	TNFRSF18	ENSG00000186891.9	50	52	0.168831	1.16983e-06
1_1158277_G_A_b37	rs3813199	Lung	TNFRSF18	ENSG00000186891.9	84	87	0.113577	2.22853e-06
1_1158277_G_A_b37	rs3813199	Whole_Blood	TNFRSF18	ENSG00000186891.9	84	87	0.117886	1.16059e-10
1_1158326_G_A_b37	rs3813198	Brain_Cerebellum	TNFRSF18	ENSG00000186891.9	50	52	0.168831	1.16983e-06
1_1158326_G_A_b37	rs3813198	Lung	TNFRSF18	ENSG00000186891.9	84	87	0.113874	2.53407e-06
1_1158326_G_A_b37	rs3813198	Whole_Blood	TNFRSF18	ENSG00000186891.9	84	87	0.117886	1.16059e-10
1_1158357_A_G_b37	rs76888271	Brain_Cerebellum	TNFRSF18	ENSG00000186891.9	50	52	0.168831	1.16983e-06
1_1158357_A_G_b37	rs76888271	Lung	TNFRSF18	ENSG00000186891.9	84	87	0.113874	2.31476e-06
1_1158357_A_G_b37	rs76888271	Whole_Blood	TNFRSF18	ENSG00000186891.9	84	87	0.118207	1.11099e-10
1_1158948_A_G_b37	rs75967767	Brain_Cerebellum	TNFRSF18	ENSG00000186891.9	50	53	0.172078	1.64839e-06
1_1158948_A_G_b37	rs75967767	Whole_Blood	TNFRSF18	ENSG00000186891.9	84	88	0.119241	4.51172e-11
1_1158948_A_G_b37	rs75967767	Lung	TNFRSF18	ENSG00000186891.9	84	88	0.114883	2.42388e-06
1_1158973_A_T_b37	rs79367599	Whole_Blood	TNFRSF18	ENSG00000186891.9	84	87	0.117886	1.16059e-10
1_1158973_A_T_b37	rs79367599	Brain_Cerebellum	TNFRSF18	ENSG00000186891.9	50	52	0.168831	1.16983e-06
1_1158973_A_T_b37	rs79367599	Lung	TNFRSF18	ENSG00000186891.9	84	87	0.113577	2.22853e-06
1_1158975_A_C_b37	rs74808088	Whole_Blood	TNFRSF18	ENSG00000186891.9	84	87	0.117886	1.16059e-10
1_1158975_A_C_b37	rs74808088	Lung	TNFRSF18	ENSG00000186891.9	84	87	0.113577	2.22853e-06
1_1158975_A_C_b37	rs74808088	Brain_Cerebellum	TNFRSF18	ENSG00000186891.9	50	52	0.168831	1.16983e-06
1_1159020_A_G_b37	rs113206287	Lung	TNFRSF18	ENSG00000186891.9	84	87	0.113577	2.22853e-06
1_1159020_A_G_b37	rs113206287	Brain_Cerebellum	TNFRSF18	ENSG00000186891.9	49	51	0.165584	8.80127e-07
1_1159020_A_G_b37	rs113206287	Whole_Blood	TNFRSF18	ENSG00000186891.9	83	86	0.116531	5.36304e-11
1_1159024_C_T_b37	rs77472198	Lung	TNFRSF18	ENSG00000186891.9	84	88	0.114883	2.42388e-06
1_1159024_C_T_b37	rs77472198	Brain_Cerebellum	TNFRSF18	ENSG00000186891.9	49	52	0.168831	1.30061e-06
1_1159024_C_T_b37	rs77472198	Whole_Blood	TNFRSF18	ENSG00000186891.9	83	87	0.117886	2.19247e-11
1_1159062_T_C_b37	rs79028173	Lung	TNFRSF18	ENSG00000186891.9	84	87	0.113577	2.22853e-06
1_1159062_T_C_b37	rs79028173	Brain_Cerebellum	TNFRSF18	ENSG00000186891.9	50	52	0.168831	1.16983e-06
1_1159062_T_C_b37	rs79028173	Whole_Blood	TNFRSF18	ENSG00000186891.9	84	87	0.117886	1.16059e-10
1_1159107_G_A_b37	rs114919826	Whole_Blood	TNFRSF18	ENSG00000186891.9	83	86	0.116848	4.67948e-10
1_1159107_G_A_b37	rs114919826	Brain_Cerebellum	TNFRSF18	ENSG00000186891.9	49	51	0.165584	1.49605e-06
1_1159107_G_A_b37	rs114919826	Lung	TNFRSF18	ENSG00000186891.9	83	86	0.112565	2.604e-06
1_1159485_C_T_b37	rs75700266	Lung	TNFRSF18	ENSG00000186891.9	84	87	0.113577	2.22853e-06
1_1159485_C_T_b37	rs75700266	Whole_Blood	TNFRSF18	ENSG00000186891.9	84	87	0.117886	1.16059e-10
1_1159485_C_T_b37	rs75700266	Brain_Cerebellum	TNFRSF18	ENSG00000186891.9	50	52	0.168831	1.16983e-06
1_1159661_GTTTTA_G_b37	rs112011543	Whole_Blood	TNFRSF18	ENSG00000186891.9	70	72	0.097561	5.13285e-09
1_1159661_GTTTTA_G_b37	rs112011543	Lung	TNFRSF18	ENSG00000186891.9	68	70	0.0913838	5.59137e-06
1_1159661_GTTTTA_G_b37	rs112011543	Nerve_Tibial	TNFRSF18	ENSG00000186891.9	75	78	0.108033	3.64443e-05
1_1159661_GTTTTA_G_b37	rs112011543	Brain_Cerebellum	TNFRSF18	ENSG00000186891.9	42	44	0.142857	2.2973e-07
1_1159729_T_G_b37	rs112733189	Brain_Cerebellum	TNFRSF18	ENSG00000186891.9	49	51	0.166667	1.48882e-06
1_1159729_T_G_b37	rs112733189	Whole_Blood	TNFRSF18	ENSG00000186891.9	83	86	0.116848	2.64642e-10
1_1159729_T_G_b37	rs112733189	Lung	TNFRSF18	ENSG00000186891.9	83	86	0.112565	4.5254e-06
1_1160163_G_A_b37	rs111452679	Brain_Cerebellum	TNFRSF18	ENSG00000186891.9	52	54	0.175325	1.5665e-05
1_1160163_G_A_b37	rs111452679	Nerve_Tibial	TNFRSF18	ENSG00000186891.9	97	101	0.139889	5.92696e-05
1_1160163_G_A_b37	rs111452679	Whole_Blood	TNFRSF18	ENSG00000186891.9	88	91	0.123306	5.34929e-10
1_1160163_G_A_b37	rs111452679	Lung	TNFRSF18	ENSG00000186891.9	90	93	0.12141	1.23655e-06
1_1160224_C_T_b37	rs79242155	Lung	TNFRSF18	ENSG00000186891.9	84	87	0.113577	2.22853e-06
1_1160224_C_T_b37	rs79242155	Brain_Cerebellum	TNFRSF18	ENSG00000186891.9	50	52	0.168831	1.16983e-06
1_1160224_C_T_b37	rs79242155	Whole_Blood	TNFRSF18	ENSG00000186891.9	84	87	0.117886	1.16059e-10
1_1160226_A_G_b37	rs75165450	Whole_Blood	TNFRSF18	ENSG00000186891.9	84	87	0.117886	1.16059e-10
1_1160226_A_G_b37	rs75165450	Lung	TNFRSF18	ENSG00000186891.9	84	87	0.113577	2.22853e-06
1_1160226_A_G_b37	rs75165450	Brain_Cerebellum	TNFRSF18	ENSG00000186891.9	50	52	0.168831	1.16983e-06
1_1160665_G_A_b37	rs6671424	Brain_Cerebellum	TNFRSF18	ENSG00000186891.9	52	54	0.175325	1.56162e-06
1_1160665_G_A_b37	rs6671424	Whole_Blood	TNFRSF18	ENSG00000186891.9	87	91	0.123306	1.26499e-10
1_1160665_G_A_b37	rs6671424	Lung	TNFRSF18	ENSG00000186891.9	86	89	0.116188	1.25621e-06
1_1160809_T_C_b37	rs3753343	Whole_Blood	TNFRSF18	ENSG00000186891.9	84	87	0.117886	1.16059e-10
1_1160809_T_C_b37	rs3753343	Brain_Cerebellum	TNFRSF18	ENSG00000186891.9	50	52	0.168831	1.16983e-06
1_1160809_T_C_b37	rs3753343	Lung	TNFRSF18	ENSG00000186891.9	84	87	0.113577	2.22853e-06
1_1160856_T_C_b37	rs3753342	Brain_Cerebellum	TNFRSF18	ENSG00000186891.9	52	56	0.181818	4.97138e-06
1_1160856_T_C_b37	rs3753342	Lung	TNFRSF18	ENSG00000186891.9	89	93	0.12141	1.28749e-07
1_1160856_T_C_b37	rs3753342	Nerve_Tibial	TNFRSF18	ENSG00000186891.9	94	103	0.142659	5.0149e-05
1_1160856_T_C_b37	rs3753342	Whole_Blood	TNFRSF18	ENSG00000186891.9	90	97	0.131436	1.7876e-12
1_1161100_CGCCACAGACACGGGCCACACACTCCACAT_C_b37	rs3834014	Brain_Cerebellum	TNFRSF18	ENSG00000186891.9	50	52	0.168831	1.16983e-06
1_1161100_CGCCACAGACACGGGCCACACACTCCACAT_C_b37	rs3834014	Whole_Blood	TNFRSF18	ENSG00000186891.9	84	87	0.118207	1.22157e-10
1_1161100_CGCCACAGACACGGGCCACACACTCCACAT_C_b37	rs3834014	Lung	TNFRSF18	ENSG00000186891.9	84	87	0.113874	2.29449e-06
1_1161362_A_G_b37	rs111698464	Brain_Cerebellum	TNFRSF18	ENSG00000186891.9	50	52	0.168831	1.16983e-06
1_1161362_A_G_b37	rs111698464	Lung	TNFRSF18	ENSG00000186891.9	84	87	0.113577	2.22853e-06
1_1161362_A_G_b37	rs111698464	Whole_Blood	TNFRSF18	ENSG00000186891.9	84	87	0.117886	1.16059e-10
1_1161393_C_T_b37	rs12087719	Brain_Cerebellum	TNFRSF18	ENSG00000186891.9	52	56	0.181818	4.97138e-06
1_1161393_C_T_b37	rs12087719	Nerve_Tibial	TNFRSF18	ENSG00000186891.9	94	103	0.142659	5.0149e-05
1_1161393_C_T_b37	rs12087719	Whole_Blood	TNFRSF18	ENSG00000186891.9	90	97	0.131436	1.7876e-12
1_1161393_C_T_b37	rs12087719	Lung	TNFRSF18	ENSG00000186891.9	89	93	0.12141	1.28749e-07
1_1161641_G_A_b37	rs78913203	Whole_Blood	TNFRSF18	ENSG00000186891.9	84	87	0.117886	1.16059e-10
1_1161641_G_A_b37	rs78913203	Brain_Cerebellum	TNFRSF18	ENSG00000186891.9	50	52	0.168831	1.16983e-06
1_1161641_G_A_b37	rs78913203	Lung	TNFRSF18	ENSG00000186891.9	84	87	0.113577	2.22853e-06
1_1161866_C_T_b37	rs78107697	Lung	TNFRSF18	ENSG00000186891.9	90	94	0.122715	6.14944e-06
1_1161866_C_T_b37	rs78107697	Adipose_Visceral_Omentum	TNFRSF18	ENSG00000186891.9	76	81	0.129393	1.42586e-05
1_1161866_C_T_b37	rs78107697	Brain_Cerebellum	TNFRSF18	ENSG00000186891.9	52	55	0.178571	7.40692e-08
1_1161866_C_T_b37	rs78107697	Nerve_Tibial	TNFRSF18	ENSG00000186891.9	96	101	0.139889	1.79519e-05
1_1161866_C_T_b37	rs78107697	Thyroid	TNFRSF18	ENSG00000186891.9	101	106	0.132832	4.51036e-05
1_1161866_C_T_b37	rs78107697	Whole_Blood	TNFRSF18	ENSG00000186891.9	92	97	0.131436	2.78003e-10
1_1162000_G_GC_b37	rs111614456	Lung	TNFRSF18	ENSG00000186891.9	80	83	0.108355	9.5435e-06
1_1162000_G_GC_b37	rs111614456	Whole_Blood	TNFRSF18	ENSG00000186891.9	82	85	0.115176	4.38019e-10
1_1162000_G_GC_b37	rs111614456	Brain_Cerebellum	TNFRSF18	ENSG00000186891.9	48	50	0.162338	8.19417e-07
1_1162272_C_T_b37	rs3766189	Brain_Cerebellum	TNFRSF18	ENSG00000186891.9	47	49	0.159091	4.20656e-06
1_1162272_C_T_b37	rs3766189	Lung	TNFRSF18	ENSG00000186891.9	79	82	0.10733	1.28801e-05
1_1162272_C_T_b37	rs3766189	Whole_Blood	TNFRSF18	ENSG00000186891.9	80	83	0.112772	1.22498e-09
1_1162281_G_A_b37	rs3766188	Whole_Blood	TNFRSF18	ENSG00000186891.9	82	85	0.115176	4.38019e-10
1_1162281_G_A_b37	rs3766188	Lung	TNFRSF18	ENSG00000186891.9	80	83	0.108355	9.5435e-06
1_1162281_G_A_b37	rs3766188	Brain_Cerebellum	TNFRSF18	ENSG00000186891.9	48	50	0.162338	8.19417e-07
1_1162316_G_T_b37	rs3766187	Brain_Cerebellum	TNFRSF18	ENSG00000186891.9	44	46	0.149351	1.52697e-05
1_1162316_G_T_b37	rs3766187	Whole_Blood	TNFRSF18	ENSG00000186891.9	70	73	0.0991848	1.03289e-07
1_1162316_G_T_b37	rs3766187	Lung	TNFRSF18	ENSG00000186891.9	72	75	0.0981675	4.04288e-05
1_1162435_C_A_b37	rs3766186	Whole_Blood	TNFRSF18	ENSG00000186891.9	84	87	0.117886	3.15581e-09
1_1162435_C_A_b37	rs3766186	Brain_Cerebellum	TNFRSF18	ENSG00000186891.9	50	52	0.168831	1.16983e-06
1_1162435_C_A_b37	rs3766186	Lung	TNFRSF18	ENSG00000186891.9	83	86	0.112272	9.0102e-06
1_1162541_G_C_b37	rs80322353	Brain_Cerebellum	TNFRSF18	ENSG00000186891.9	50	52	0.168831	1.16983e-06
1_1162541_G_C_b37	rs80322353	Whole_Blood	TNFRSF18	ENSG00000186891.9	84	87	0.117886	1.16059e-10
1_1162541_G_C_b37	rs80322353	Lung	TNFRSF18	ENSG00000186891.9	84	87	0.113577	2.22853e-06
1_1163172_T_C_b37	rs112819941	Whole_Blood	TNFRSF18	ENSG00000186891.9	84	87	0.117886	1.16059e-10
1_1163172_T_C_b37	rs112819941	Brain_Cerebellum	TNFRSF18	ENSG00000186891.9	50	52	0.168831	1.16983e-06
1_1163172_T_C_b37	rs112819941	Lung	TNFRSF18	ENSG00000186891.9	84	87	0.113577	2.22853e-06
1_1163266_G_A_b37	rs112328659	Brain_Cerebellum	TNFRSF18	ENSG00000186891.9	42	44	0.142857	2.2973e-07
1_1163266_G_A_b37	rs112328659	Whole_Blood	TNFRSF18	ENSG00000186891.9	70	72	0.097561	5.13285e-09
1_1163266_G_A_b37	rs112328659	Lung	TNFRSF18	ENSG00000186891.9	68	70	0.0913838	5.59137e-06
1_1163266_G_A_b37	rs112328659	Nerve_Tibial	TNFRSF18	ENSG00000186891.9	75	78	0.108033	3.64443e-05
1_1163355_T_C_b37	rs55701216	Whole_Blood	TNFRSF18	ENSG00000186891.9	84	87	0.117886	1.16059e-10
1_1163355_T_C_b37	rs55701216	Lung	TNFRSF18	ENSG00000186891.9	84	87	0.113577	2.22853e-06
1_1163355_T_C_b37	rs55701216	Brain_Cerebellum	TNFRSF18	ENSG00000186891.9	50	52	0.168831	1.16983e-06
1_1163449_T_C_b37	rs56070543	Whole_Blood	TNFRSF18	ENSG00000186891.9	82	84	0.113821	1.36344e-10
1_1163449_T_C_b37	rs56070543	Brain_Cerebellum	TNFRSF18	ENSG00000186891.9	49	51	0.165584	8.80127e-07
1_1163449_T_C_b37	rs56070543	Lung	TNFRSF18	ENSG00000186891.9	85	87	0.113577	1.4021e-05
1_1163474_A_G_b37	rs56378990	Brain_Cerebellum	TNFRSF18	ENSG00000186891.9	37	39	0.126623	9.4885e-06
1_1163474_A_G_b37	rs56378990	Whole_Blood	TNFRSF18	ENSG00000186891.9	71	73	0.098916	1.33818e-08
1_1163804_C_T_b37	rs7515488	Lung	TNFRSF18	ENSG00000186891.9	117	124	0.16188	2.07679e-05
1_1163804_C_T_b37	rs7515488	Adipose_Visceral_Omentum	TNFRSF18	ENSG00000186891.9	99	105	0.167732	1.02055e-06
1_1163804_C_T_b37	rs7515488	Adipose_Subcutaneous	TNFRSF18	ENSG00000186891.9	129	139	0.18099	3.45606e-06
1_1163804_C_T_b37	rs7515488	Nerve_Tibial	TNFRSF18	ENSG00000186891.9	120	128	0.177778	8.87617e-06
1_1163804_C_T_b37	rs7515488	Brain_Cerebellum	TNFRSF18	ENSG00000186891.9	57	60	0.194805	6.32859e-07
1_1163804_C_T_b37	rs7515488	Whole_Blood	TNFRSF18	ENSG00000186891.9	116	126	0.171196	3.1974e-09
1_1163804_C_T_b37	rs7515488	Thyroid	TNFRSF18	ENSG00000186891.9	126	136	0.170854	1.41278e-05
1_1164540_G_T_b37	rs80229541	Brain_Cerebellum	TNFRSF18	ENSG00000186891.9	50	52	0.168831	1.16983e-06
1_1164540_G_T_b37	rs80229541	Lung	TNFRSF18	ENSG00000186891.9	84	87	0.113577	2.22853e-06
1_1164540_G_T_b37	rs80229541	Whole_Blood	TNFRSF18	ENSG00000186891.9	84	87	0.117886	1.16059e-10
1_1164687_G_C_b37	rs75188282	Brain_Cerebellum	TNFRSF18	ENSG00000186891.9	50	52	0.168831	1.16983e-06
1_1164687_G_C_b37	rs75188282	Whole_Blood	TNFRSF18	ENSG00000186891.9	84	87	0.117886	1.16059e-10
1_1164687_G_C_b37	rs75188282	Lung	TNFRSF18	ENSG00000186891.9	84	87	0.113577	2.22853e-06
1_1164749_G_GC_b37	rs113272753	Thyroid	TNFRSF18	ENSG00000186891.9	139	156	0.19598	1.29968e-05
1_1164749_G_GC_b37	rs113272753	Adipose_Subcutaneous	TNFRSF18	ENSG00000186891.9	139	155	0.201299	6.03867e-07
1_1164749_G_GC_b37	rs113272753	Lung	TNFRSF18	ENSG00000186891.9	127	140	0.182768	7.51214e-06
1_1164749_G_GC_b37	rs113272753	Brain_Cerebellum	TNFRSF18	ENSG00000186891.9	63	69	0.22549	8.44107e-07
1_1164749_G_GC_b37	rs113272753	Whole_Blood	TNFRSF18	ENSG00000186891.9	127	142	0.192412	2.31903e-11
1_1164749_G_GC_b37	rs113272753	Adipose_Visceral_Omentum	TNFRSF18	ENSG00000186891.9	107	118	0.188498	7.00578e-07
1_1164749_G_GC_b37	rs113272753	Nerve_Tibial	TNFRSF18	ENSG00000186891.9	131	146	0.202216	1.33618e-05
1_1165280_GCA_G_b37	rs148801934	Brain_Cerebellum	TNFRSF18	ENSG00000186891.9	50	52	0.168831	1.16983e-06
1_1165280_GCA_G_b37	rs148801934	Whole_Blood	TNFRSF18	ENSG00000186891.9	84	87	0.117886	1.16059e-10
1_1165280_GCA_G_b37	rs148801934	Lung	TNFRSF18	ENSG00000186891.9	84	87	0.113577	2.22853e-06
1_1165320_CAT_C_b37	rs143841174	Brain_Cerebellum	TNFRSF18	ENSG00000186891.9	50	52	0.168831	1.16983e-06
1_1165320_CAT_C_b37	rs143841174	Lung	TNFRSF18	ENSG00000186891.9	85	88	0.114883	1.08534e-06
1_1165320_CAT_C_b37	rs143841174	Whole_Blood	TNFRSF18	ENSG00000186891.9	85	88	0.119241	5.06463e-11
1_1165361_A_G_b37	rs76024681	Brain_Cerebellum	TNFRSF18	ENSG00000186891.9	49	51	0.166667	2.03406e-06
1_1165361_A_G_b37	rs76024681	Lung	TNFRSF18	ENSG00000186891.9	83	86	0.112565	7.82432e-06
1_1165361_A_G_b37	rs76024681	Whole_Blood	TNFRSF18	ENSG00000186891.9	83	86	0.116848	1.20938e-10
1_1165471_T_C_b37	rs77819818	Whole_Blood	TNFRSF18	ENSG00000186891.9	84	87	0.117886	1.16059e-10
1_1165471_T_C_b37	rs77819818	Brain_Cerebellum	TNFRSF18	ENSG00000186891.9	50	52	0.168831	1.16983e-06
1_1165471_T_C_b37	rs77819818	Lung	TNFRSF18	ENSG00000186891.9	84	87	0.113577	2.22853e-06
1_1165630_G_A_b37	rs113792230	Brain_Cerebellum	TNFRSF18	ENSG00000186891.9	41	43	0.140523	2.53554e-07
1_1165630_G_A_b37	rs113792230	Whole_Blood	TNFRSF18	ENSG00000186891.9	69	71	0.0964674	3.07367e-09
1_1165630_G_A_b37	rs113792230	Lung	TNFRSF18	ENSG00000186891.9	67	69	0.0903141	4.32612e-06
1_1165630_G_A_b37	rs113792230	Nerve_Tibial	TNFRSF18	ENSG00000186891.9	74	77	0.106944	4.71696e-05
1_1165725_A_G_b37	rs77696650	Brain_Cerebellum	TNFRSF18	ENSG00000186891.9	49	51	0.166667	3.26624e-06
1_1165725_A_G_b37	rs77696650	Lung	TNFRSF18	ENSG00000186891.9	83	86	0.112565	3.31231e-06
1_1165725_A_G_b37	rs77696650	Whole_Blood	TNFRSF18	ENSG00000186891.9	83	86	0.116848	1.59041e-10
1_1165821_T_C_b37	rs79493008	Brain_Cerebellum	TNFRSF18	ENSG00000186891.9	50	52	0.178082	7.64254e-06
1_1165821_T_C_b37	rs79493008	Lung	TNFRSF18	ENSG00000186891.9	84	87	0.120833	2.72417e-06
1_1165821_T_C_b37	rs79493008	Whole_Blood	TNFRSF18	ENSG00000186891.9	84	87	0.12536	4.49779e-11
1_1166075_G_A_b37	rs55893507	Brain_Cerebellum	TNFRSF18	ENSG00000186891.9	50	52	0.168831	1.16983e-06
1_1166075_G_A_b37	rs55893507	Whole_Blood	TNFRSF18	ENSG00000186891.9	84	87	0.117886	1.16059e-10
1_1166075_G_A_b37	rs55893507	Lung	TNFRSF18	ENSG00000186891.9	84	87	0.113577	2.22853e-06
1_1166177_G_C_b37	rs55717744	Brain_Cerebellum	TNFRSF18	ENSG00000186891.9	50	52	0.168831	1.16983e-06
1_1166177_G_C_b37	rs55717744	Whole_Blood	TNFRSF18	ENSG00000186891.9	84	87	0.117886	1.16059e-10
1_1166177_G_C_b37	rs55717744	Lung	TNFRSF18	ENSG00000186891.9	84	87	0.113577	2.22853e-06
1_1166205_C_T_b37	rs56316126	Whole_Blood	TNFRSF18	ENSG00000186891.9	84	87	0.117886	1.16059e-10
1_1166205_C_T_b37	rs56316126	Brain_Cerebellum	TNFRSF18	ENSG00000186891.9	50	52	0.168831	1.16983e-06
1_1166205_C_T_b37	rs56316126	Lung	TNFRSF18	ENSG00000186891.9	84	87	0.113577	2.22853e-06
1_1166887_T_C_b37	rs60252802	Adipose_Visceral_Omentum	TNFRSF18	ENSG00000186891.9	96	103	0.164537	1.86667e-08
1_1166887_T_C_b37	rs60252802	Nerve_Tibial	TNFRSF18	ENSG00000186891.9	114	124	0.171745	4.69418e-07
1_1166887_T_C_b37	rs60252802	Brain_Cerebellum	TNFRSF18	ENSG00000186891.9	59	62	0.201299	3.56982e-07
1_1166887_T_C_b37	rs60252802	Lung	TNFRSF18	ENSG00000186891.9	109	116	0.151436	1.19052e-06
1_1166887_T_C_b37	rs60252802	Thyroid	TNFRSF18	ENSG00000186891.9	122	134	0.16792	2.87911e-06
1_1166887_T_C_b37	rs60252802	Adipose_Subcutaneous	TNFRSF18	ENSG00000186891.9	123	134	0.174026	5.28481e-06
1_1166887_T_C_b37	rs60252802	Breast_Mammary_Tissue	TNFRSF18	ENSG00000186891.9	77	87	0.173307	7.89986e-06
1_1166887_T_C_b37	rs60252802	Whole_Blood	TNFRSF18	ENSG00000186891.9	111	123	0.166667	3.37006e-09
1_1167090_CCCCCGGGAA_C_b37	rs57672822	Brain_Cerebellum	TNFRSF18	ENSG00000186891.9	57	61	0.198052	2.552e-07
1_1167090_CCCCCGGGAA_C_b37	rs57672822	Thyroid	TNFRSF18	ENSG00000186891.9	111	120	0.151134	6.57908e-06
1_1167090_CCCCCGGGAA_C_b37	rs57672822	Nerve_Tibial	TNFRSF18	ENSG00000186891.9	105	116	0.161111	2.61309e-06
1_1167090_CCCCCGGGAA_C_b37	rs57672822	Lung	TNFRSF18	ENSG00000186891.9	99	105	0.137795	4.75864e-07
1_1167090_CCCCCGGGAA_C_b37	rs57672822	Whole_Blood	TNFRSF18	ENSG00000186891.9	103	111	0.150407	6.15824e-12
1_1167090_CCCCCGGGAA_C_b37	rs57672822	Adipose_Visceral_Omentum	TNFRSF18	ENSG00000186891.9	85	92	0.147436	2.98224e-06
1_1167090_CCCCCGGGAA_C_b37	rs57672822	Adipose_Subcutaneous	TNFRSF18	ENSG00000186891.9	108	116	0.151436	3.28692e-05
1_1170982_C_A_b37	rs77994686	Thyroid	TNFRSF18	ENSG00000186891.9	96	101	0.126566	4.26638e-05
1_1170982_C_A_b37	rs77994686	Nerve_Tibial	TNFRSF18	ENSG00000186891.9	91	97	0.134349	3.54757e-07
1_1170982_C_A_b37	rs77994686	Lung	TNFRSF18	ENSG00000186891.9	87	90	0.117493	1.31001e-05
1_1170982_C_A_b37	rs77994686	Brain_Cerebellum	TNFRSF18	ENSG00000186891.9	50	53	0.172078	1.21097e-07
1_1170982_C_A_b37	rs77994686	Adipose_Visceral_Omentum	TNFRSF18	ENSG00000186891.9	75	78	0.124601	5.88341e-06
1_1170982_C_A_b37	rs77994686	Whole_Blood	TNFRSF18	ENSG00000186891.9	88	93	0.126016	5.04093e-10
1_1171022_G_C_b37	rs12089192	Brain_Cerebellum	TNFRSF18	ENSG00000186891.9	54	56	0.181818	1.98302e-05
1_1171022_G_C_b37	rs12089192	Lung	TNFRSF18	ENSG00000186891.9	103	108	0.140992	3.69896e-07
1_1171022_G_C_b37	rs12089192	Thyroid	TNFRSF18	ENSG00000186891.9	113	120	0.150376	7.39376e-05
1_1171022_G_C_b37	rs12089192	Nerve_Tibial	TNFRSF18	ENSG00000186891.9	102	109	0.15097	8.78056e-06
1_1171022_G_C_b37	rs12089192	Adipose_Subcutaneous	TNFRSF18	ENSG00000186891.9	111	118	0.153247	4.15896e-05
1_1171022_G_C_b37	rs12089192	Adipose_Visceral_Omentum	TNFRSF18	ENSG00000186891.9	83	88	0.140575	2.70705e-08
1_1171022_G_C_b37	rs12089192	Whole_Blood	TNFRSF18	ENSG00000186891.9	103	109	0.147696	8.97729e-10
1_1171249_T_C_b37	rs7528416	Lung	TNFRSF18	ENSG00000186891.9	69	71	0.0926893	1.86707e-07
1_1171249_T_C_b37	rs7528416	Brain_Cerebellum	TNFRSF18	ENSG00000186891.9	43	45	0.146104	6.00338e-08
1_1171249_T_C_b37	rs7528416	Nerve_Tibial	TNFRSF18	ENSG00000186891.9	76	80	0.110803	3.79381e-05
1_1171249_T_C_b37	rs7528416	Whole_Blood	TNFRSF18	ENSG00000186891.9	75	78	0.105691	1.098e-10
1_1171249_T_C_b37	rs7528416	Adipose_Visceral_Omentum	TNFRSF18	ENSG00000186891.9	58	60	0.0958466	5.55563e-06
1_1171377_A_G_b37	rs7536250	Nerve_Tibial	TNFRSF18	ENSG00000186891.9	95	107	0.148199	2.34905e-05
1_1171377_A_G_b37	rs7536250	Whole_Blood	TNFRSF18	ENSG00000186891.9	90	98	0.132791	5.4354e-11
1_1171377_A_G_b37	rs7536250	Lung	TNFRSF18	ENSG00000186891.9	89	96	0.125326	2.22478e-07
1_1171377_A_G_b37	rs7536250	Adipose_Visceral_Omentum	TNFRSF18	ENSG00000186891.9	72	79	0.126198	9.52139e-06
1_1171417_C_T_b37	rs6603782	Adipose_Visceral_Omentum	TNFRSF18	ENSG00000186891.9	192	235	0.375399	4.7745e-06
1_1171683_A_G_b37	rs7536568	Thyroid	TNFRSF18	ENSG00000186891.9	109	117	0.146617	5.55763e-06
1_1171683_A_G_b37	rs7536568	Brain_Cerebellum	TNFRSF18	ENSG00000186891.9	50	55	0.178571	2.47406e-06
1_1171683_A_G_b37	rs7536568	Adipose_Subcutaneous	TNFRSF18	ENSG00000186891.9	104	111	0.144156	1.96276e-06
1_1171683_A_G_b37	rs7536568	Nerve_Tibial	TNFRSF18	ENSG00000186891.9	102	112	0.155125	1.55177e-06
1_1171683_A_G_b37	rs7536568	Lung	TNFRSF18	ENSG00000186891.9	95	101	0.131854	1.54394e-06
1_1171683_A_G_b37	rs7536568	Whole_Blood	TNFRSF18	ENSG00000186891.9	99	106	0.143631	2.44297e-11
1_1171683_A_G_b37	rs7536568	Adipose_Visceral_Omentum	TNFRSF18	ENSG00000186891.9	84	90	0.14377	1.41338e-07
1_1173611_G_A_b37	rs6697886	Brain_Cerebellum	TNFRSF18	ENSG00000186891.9	64	73	0.237013	6.5321e-06
1_1173611_G_A_b37	rs6697886	Lung	TNFRSF18	ENSG00000186891.9	120	136	0.177546	2.11875e-07
1_1173611_G_A_b37	rs6697886	Thyroid	TNFRSF18	ENSG00000186891.9	136	157	0.196742	1.93576e-06
1_1173611_G_A_b37	rs6697886	Whole_Blood	TNFRSF18	ENSG00000186891.9	123	140	0.189702	1.86885e-11
1_1173611_G_A_b37	rs6697886	Adipose_Subcutaneous	TNFRSF18	ENSG00000186891.9	134	152	0.197403	1.25077e-07
1_1173611_G_A_b37	rs6697886	Nerve_Tibial	TNFRSF18	ENSG00000186891.9	125	143	0.198061	9.57874e-07
1_1173611_G_A_b37	rs6697886	Adipose_Visceral_Omentum	TNFRSF18	ENSG00000186891.9	103	116	0.185304	1.37885e-09
1_1174263_G_A_b37	rs80242057	Nerve_Tibial	TNFRSF18	ENSG00000186891.9	76	79	0.109418	1.37599e-05
1_1174263_G_A_b37	rs80242057	Lung	TNFRSF18	ENSG00000186891.9	68	70	0.0913838	9.50448e-06
1_1174263_G_A_b37	rs80242057	Whole_Blood	TNFRSF18	ENSG00000186891.9	70	72	0.097561	9.25802e-09
1_1174263_G_A_b37	rs80242057	Brain_Cerebellum	TNFRSF18	ENSG00000186891.9	43	45	0.146104	2.17726e-07
1_1174282_T_C_b37	rs4970364	Adipose_Visceral_Omentum	TNFRSF18	ENSG00000186891.9	161	201	0.321086	5.17979e-06
1_1174282_T_C_b37	rs4970364	Adipose_Subcutaneous	TNFRSF18	ENSG00000186891.9	215	270	0.350649	4.0997e-05
1_1174506_C_CT_b37	rs747912079	Lung	TNFRSF18	ENSG00000186891.9	87	91	0.118799	1.41382e-06
1_1174506_C_CT_b37	rs747912079	Whole_Blood	TNFRSF18	ENSG00000186891.9	85	89	0.120596	1.08917e-10
1_1174506_C_CT_b37	rs747912079	Brain_Cerebellum	TNFRSF18	ENSG00000186891.9	50	53	0.172078	6.62307e-06
1_1174507_A_ACATGCATCC_b37	rs143860491	Lung	TNFRSF18	ENSG00000186891.9	87	91	0.118799	1.41382e-06
1_1174507_A_ACATGCATCC_b37	rs143860491	Brain_Cerebellum	TNFRSF18	ENSG00000186891.9	50	53	0.172078	6.62307e-06
1_1174507_A_ACATGCATCC_b37	rs143860491	Whole_Blood	TNFRSF18	ENSG00000186891.9	85	89	0.120596	1.08917e-10
1_1174954_T_C_b37	rs6687563	Lung	TNFRSF18	ENSG00000186891.9	87	91	0.118799	1.41382e-06
1_1174954_T_C_b37	rs6687563	Brain_Cerebellum	TNFRSF18	ENSG00000186891.9	50	53	0.172078	6.62307e-06
1_1174954_T_C_b37	rs6687563	Whole_Blood	TNFRSF18	ENSG00000186891.9	85	89	0.120596	1.08917e-10
1_1175305_G_A_b37	rs115765087	Nerve_Tibial	TNFRSF18	ENSG00000186891.9	70	73	0.101108	2.4468e-05
1_1175305_G_A_b37	rs115765087	Brain_Cerebellum	TNFRSF18	ENSG00000186891.9	41	43	0.13961	1.17396e-07
1_1175305_G_A_b37	rs115765087	Whole_Blood	TNFRSF18	ENSG00000186891.9	66	68	0.0921409	6.60665e-09
1_1175305_G_A_b37	rs115765087	Lung	TNFRSF18	ENSG00000186891.9	64	66	0.0861619	7.76079e-07
1_1175747_A_G_b37	rs113143549	Lung	TNFRSF18	ENSG00000186891.9	86	90	0.117493	1.03278e-06
1_1175747_A_G_b37	rs113143549	Whole_Blood	TNFRSF18	ENSG00000186891.9	85	88	0.119241	8.67774e-11
1_1175747_A_G_b37	rs113143549	Brain_Cerebellum	TNFRSF18	ENSG00000186891.9	50	53	0.172078	6.62307e-06
1_1175770_G_A_b37	rs114105718	Whole_Blood	TNFRSF18	ENSG00000186891.9	68	70	0.0948509	2.32652e-09
1_1175770_G_A_b37	rs114105718	Nerve_Tibial	TNFRSF18	ENSG00000186891.9	74	77	0.106648	2.33194e-05
1_1175770_G_A_b37	rs114105718	Brain_Cerebellum	TNFRSF18	ENSG00000186891.9	42	44	0.142857	2.2973e-07
1_1175770_G_A_b37	rs114105718	Lung	TNFRSF18	ENSG00000186891.9	66	68	0.0887728	7.92065e-06
1_1176433_A_G_b37	rs12096091	Whole_Blood	TNFRSF18	ENSG00000186891.9	86	92	0.124661	2.16881e-07
1_1176433_A_G_b37	rs12096091	Adipose_Visceral_Omentum	TNFRSF18	ENSG00000186891.9	70	74	0.118211	4.94362e-07
1_1176433_A_G_b37	rs12096091	Lung	TNFRSF18	ENSG00000186891.9	90	99	0.129243	9.12444e-06
1_1176597_T_C_b37	rs6675798	Adipose_Subcutaneous	TNFRSF18	ENSG00000186891.9	98	109	0.141558	3.18701e-05
1_1176597_T_C_b37	rs6675798	Whole_Blood	TNFRSF18	ENSG00000186891.9	91	100	0.135501	1.94166e-07
1_1176597_T_C_b37	rs6675798	Adipose_Visceral_Omentum	TNFRSF18	ENSG00000186891.9	74	80	0.127796	3.28259e-07
1_1176597_T_C_b37	rs6675798	Lung	TNFRSF18	ENSG00000186891.9	89	98	0.127937	4.17366e-06
1_1177019_T_C_b37	rs77550145	Lung	TNFRSF18	ENSG00000186891.9	87	95	0.124021	1.94908e-05
1_1177019_T_C_b37	rs77550145	Adipose_Visceral_Omentum	TNFRSF18	ENSG00000186891.9	69	73	0.116613	1.13486e-06
1_1177019_T_C_b37	rs77550145	Whole_Blood	TNFRSF18	ENSG00000186891.9	84	90	0.121951	1.20765e-07
1_1177211_G_C_b37	rs79361800	Whole_Blood	TNFRSF18	ENSG00000186891.9	77	79	0.107046	6.15774e-06
1_1177211_G_C_b37	rs79361800	Adipose_Visceral_Omentum	TNFRSF18	ENSG00000186891.9	63	65	0.103834	2.68664e-06
1_1177474_A_G_b37	rs2297863	Lung	TNFRSF18	ENSG00000186891.9	88	97	0.126632	1.10247e-05
1_1177474_A_G_b37	rs2297863	Adipose_Visceral_Omentum	TNFRSF18	ENSG00000186891.9	70	74	0.118211	4.94362e-07
1_1177474_A_G_b37	rs2297863	Whole_Blood	TNFRSF18	ENSG00000186891.9	85	91	0.123306	1.023e-07
1_1177630_A_G_b37	rs2297864	Whole_Blood	TNFRSF18	ENSG00000186891.9	85	91	0.123641	9.14858e-08
1_1177630_A_G_b37	rs2297864	Adipose_Subcutaneous	TNFRSF18	ENSG00000186891.9	94	101	0.13151	4.28418e-05
1_1177630_A_G_b37	rs2297864	Lung	TNFRSF18	ENSG00000186891.9	88	97	0.126963	8.58026e-06
1_1177630_A_G_b37	rs2297864	Adipose_Visceral_Omentum	TNFRSF18	ENSG00000186891.9	70	74	0.11859	4.52828e-07
1_1177918_CT_C_b37	rs3835300	Lung	TNFRSF18	ENSG00000186891.9	47	48	0.0628272	1.61888e-05
1_1177918_CT_C_b37	rs3835300	Whole_Blood	TNFRSF18	ENSG00000186891.9	44	45	0.0611413	2.01217e-06
1_1178245_C_T_b37	rs11260566	Adipose_Visceral_Omentum	TNFRSF18	ENSG00000186891.9	71	77	0.123003	1.76889e-07
1_1178245_C_T_b37	rs11260566	Lung	TNFRSF18	ENSG00000186891.9	89	99	0.129243	3.22602e-06
1_1178245_C_T_b37	rs11260566	Adipose_Subcutaneous	TNFRSF18	ENSG00000186891.9	97	106	0.137662	5.6235e-06
1_1178245_C_T_b37	rs11260566	Whole_Blood	TNFRSF18	ENSG00000186891.9	90	98	0.132791	5.88981e-09
1_1178482_A_G_b37	rs78555129	Lung	TNFRSF18	ENSG00000186891.9	89	101	0.131854	1.58069e-06
1_1178482_A_G_b37	rs78555129	Whole_Blood	TNFRSF18	ENSG00000186891.9	90	101	0.136856	7.26674e-09
1_1178482_A_G_b37	rs78555129	Adipose_Subcutaneous	TNFRSF18	ENSG00000186891.9	98	110	0.142857	1.18244e-05
1_1178482_A_G_b37	rs78555129	Adipose_Visceral_Omentum	TNFRSF18	ENSG00000186891.9	73	81	0.129393	4.45414e-07
1_1178925_G_A_b37	rs12093154	Whole_Blood	TNFRSF18	ENSG00000186891.9	73	77	0.104336	6.40001e-06
1_1178925_G_A_b37	rs12093154	Lung	TNFRSF18	ENSG00000186891.9	73	78	0.101828	1.47917e-05
1_1178925_G_A_b37	rs12093154	Adipose_Visceral_Omentum	TNFRSF18	ENSG00000186891.9	59	62	0.0990415	2.60613e-07
1_1179030_G_A_b37	rs111673713	Lung	TNFRSF18	ENSG00000186891.9	75	81	0.105744	3.29273e-06
1_1179030_G_A_b37	rs111673713	Adipose_Visceral_Omentum	TNFRSF18	ENSG00000186891.9	63	67	0.107029	5.31956e-08
1_1179030_G_A_b37	rs111673713	Adipose_Subcutaneous	TNFRSF18	ENSG00000186891.9	87	94	0.122078	8.76075e-06
1_1179030_G_A_b37	rs111673713	Whole_Blood	TNFRSF18	ENSG00000186891.9	79	84	0.113821	2.62379e-07
1_1179309_G_A_b37	rs113164957	Adipose_Visceral_Omentum	TNFRSF18	ENSG00000186891.9	59	62	0.0990415	2.60613e-07
1_1179309_G_A_b37	rs113164957	Lung	TNFRSF18	ENSG00000186891.9	73	78	0.101828	1.47917e-05
1_1179309_G_A_b37	rs113164957	Whole_Blood	TNFRSF18	ENSG00000186891.9	73	77	0.104336	6.40001e-06
1_1179983_G_A_b37	rs76342560	Lung	TNFRSF18	ENSG00000186891.9	80	88	0.114883	1.37884e-05
1_1179983_G_A_b37	rs76342560	Adipose_Visceral_Omentum	TNFRSF18	ENSG00000186891.9	65	71	0.113419	1.75653e-06
1_1179983_G_A_b37	rs76342560	Whole_Blood	TNFRSF18	ENSG00000186891.9	83	91	0.123306	1.4803e-07
1_1181751_T_C_b37	rs6603783	Adipose_Visceral_Omentum	TNFRSF18	ENSG00000186891.9	76	84	0.134185	2.2379e-07
1_1181751_T_C_b37	rs6603783	Lung	TNFRSF18	ENSG00000186891.9	92	104	0.13577	3.65088e-07
1_1181751_T_C_b37	rs6603783	Whole_Blood	TNFRSF18	ENSG00000186891.9	93	104	0.140921	1.64153e-08
1_1181751_T_C_b37	rs6603783	Adipose_Subcutaneous	TNFRSF18	ENSG00000186891.9	100	113	0.146753	3.21771e-06
1_1183397_C_T_b37	rs78446752	Whole_Blood	TNFRSF18	ENSG00000186891.9	43	44	0.0599455	1.46085e-06
1_1183397_C_T_b37	rs78446752	Adipose_Visceral_Omentum	TNFRSF18	ENSG00000186891.9	37	38	0.0608974	2.85727e-05
1_1183397_C_T_b37	rs78446752	Lung	TNFRSF18	ENSG00000186891.9	46	47	0.0615183	1.90118e-06
1_1185260_A_G_b37	rs4567233	Lung	TNFRSF18	ENSG00000186891.9	103	117	0.152742	3.69565e-07
1_1185260_A_G_b37	rs4567233	Adipose_Visceral_Omentum	TNFRSF18	ENSG00000186891.9	86	98	0.15655	4.30783e-09
1_1185260_A_G_b37	rs4567233	Whole_Blood	TNFRSF18	ENSG00000186891.9	103	118	0.159892	2.11443e-08
1_1185260_A_G_b37	rs4567233	Thyroid	TNFRSF18	ENSG00000186891.9	119	137	0.171679	4.59864e-05
1_1185260_A_G_b37	rs4567233	Nerve_Tibial	TNFRSF18	ENSG00000186891.9	104	119	0.16482	2.58115e-05
1_1185260_A_G_b37	rs4567233	Adipose_Subcutaneous	TNFRSF18	ENSG00000186891.9	111	128	0.166234	7.31971e-08
1_1185524_T_C_b37	rs115270700	Whole_Blood	TNFRSF18	ENSG00000186891.9	47	48	0.0650406	3.07876e-07
1_1185524_T_C_b37	rs115270700	Lung	TNFRSF18	ENSG00000186891.9	50	51	0.0665796	7.14722e-07
1_1185524_T_C_b37	rs115270700	Adipose_Visceral_Omentum	TNFRSF18	ENSG00000186891.9	41	42	0.0670926	1.19382e-05
1_1185558_T_C_b37	rs142609243	Lung	TNFRSF18	ENSG00000186891.9	49	51	0.0665796	1.15327e-06
1_1185558_T_C_b37	rs142609243	Whole_Blood	TNFRSF18	ENSG00000186891.9	45	48	0.0650406	9.16243e-07
1_1186502_A_T_b37	rs6603785	Breast_Mammary_Tissue	TNFRSF18	ENSG00000186891.9	77	91	0.181275	1.24447e-05
1_1186502_A_T_b37	rs6603785	Adipose_Subcutaneous	TNFRSF18	ENSG00000186891.9	118	135	0.175325	1.63297e-07
1_1186502_A_T_b37	rs6603785	Whole_Blood	TNFRSF18	ENSG00000186891.9	107	122	0.165312	3.69108e-08
1_1186502_A_T_b37	rs6603785	Lung	TNFRSF18	ENSG00000186891.9	106	120	0.156658	7.42031e-08
1_1186502_A_T_b37	rs6603785	Nerve_Tibial	TNFRSF18	ENSG00000186891.9	108	123	0.17036	1.81872e-05
1_1186502_A_T_b37	rs6603785	Thyroid	TNFRSF18	ENSG00000186891.9	125	143	0.179198	2.261e-05
1_1186502_A_T_b37	rs6603785	Adipose_Visceral_Omentum	TNFRSF18	ENSG00000186891.9	91	104	0.166134	5.3869e-08
1_1186665_G_A_b37	rs6657544	Lung	TNFRSF18	ENSG00000186891.9	85	94	0.126005	2.9024e-06
1_1186665_G_A_b37	rs6657544	Adipose_Visceral_Omentum	TNFRSF18	ENSG00000186891.9	72	79	0.127832	2.88762e-06
1_1186665_G_A_b37	rs6657544	Adipose_Subcutaneous	TNFRSF18	ENSG00000186891.9	99	108	0.144772	2.50225e-05
1_1186665_G_A_b37	rs6657544	Whole_Blood	TNFRSF18	ENSG00000186891.9	88	96	0.133705	2.50205e-07
1_1186998_G_A_b37	rs113679913	Whole_Blood	TNFRSF18	ENSG00000186891.9	88	96	0.130081	2.37097e-07
1_1186998_G_A_b37	rs113679913	Adipose_Subcutaneous	TNFRSF18	ENSG00000186891.9	100	109	0.141558	4.3688e-05
1_1186998_G_A_b37	rs113679913	Lung	TNFRSF18	ENSG00000186891.9	85	94	0.122715	1.75897e-06
1_1186998_G_A_b37	rs113679913	Adipose_Visceral_Omentum	TNFRSF18	ENSG00000186891.9	72	79	0.126198	5.62772e-06
1_1187641_C_T_b37	rs74491544	Lung	TNFRSF18	ENSG00000186891.9	57	59	0.0770235	1.27607e-06
1_1187641_C_T_b37	rs74491544	Whole_Blood	TNFRSF18	ENSG00000186891.9	57	59	0.0799458	2.55118e-08
1_1187867_C_A_b37	rs112905538	Whole_Blood	TNFRSF18	ENSG00000186891.9	51	52	0.0704607	1.86683e-06
1_1187867_C_A_b37	rs112905538	Lung	TNFRSF18	ENSG00000186891.9	52	53	0.0691906	2.23593e-07
1_1187993_C_G_b37	rs6603786	Lung	TNFRSF18	ENSG00000186891.9	59	63	0.0822454	3.93482e-09
1_1187993_C_G_b37	rs6603786	Whole_Blood	TNFRSF18	ENSG00000186891.9	61	67	0.0907859	1.33625e-07
1_1188225_G_T_b37	rs6603787	Lung	TNFRSF18	ENSG00000186891.9	42	43	0.0561358	5.28282e-07
1_1191870_C_T_b37	rs3818646	Whole_Blood	TNFRSF18	ENSG00000186891.9	43	44	0.0596206	1.17916e-05
1_1193586_AT_A_b37	rs796333038	Adipose_Subcutaneous	TNFRSF18	ENSG00000186891.9	176	219	0.305866	7.74055e-06
1_1194804_T_C_b37	rs11804831	Adipose_Subcutaneous	TNFRSF18	ENSG00000186891.9	183	231	0.3	1.64071e-07
1_1210352_A_G_b37	rs11260575	Adipose_Subcutaneous	TNFRSF18	ENSG00000186891.9	112	137	0.177922	2.33581e-05
1_1210471_T_C_b37	rs11260577	Adipose_Subcutaneous	TNFRSF18	ENSG00000186891.9	112	138	0.179221	4.29878e-05
1_1212649_T_C_b37	rs59225223	Adipose_Subcutaneous	TNFRSF18	ENSG00000186891.9	111	135	0.176702	2.05311e-05
1_1213787_T_TA_b37	rs397969959	Adipose_Subcutaneous	TNFRSF18	ENSG00000186891.9	111	136	0.188889	2.92442e-05
1_1215424_T_C_b37	rs1268339	Adipose_Subcutaneous	TNFRSF18	ENSG00000186891.9	203	259	0.336364	2.67827e-06
1_1223622_TGTCTCTGCTCCGTCCCGTGTCTCTGCTCCGTCCCCCGA_T_b37	rs771513064	Whole_Blood	TNFRSF18	ENSG00000186891.9	10	10	0.0149254	4.49306e-06
1_1232543_A_G_b37	rs147583531	Cells_Transformed_fibroblasts	ISG15	ENSG00000187608.5	17	22	0.0398551	3.27893e-05
1_1232547_G_T_b37	rs192421631	Cells_Transformed_fibroblasts	ISG15	ENSG00000187608.5	16	20	0.0383142	2.39435e-06
1_1232548_C_T_b37	rs142090261	Cells_Transformed_fibroblasts	ISG15	ENSG00000187608.5	17	22	0.0384615	3.70218e-05
1_1260462_C_T_b37	rs144022893	Ovary	ISG15	ENSG00000187608.5	3	3	0.0122951	1.72063e-06
1_1265051_G_A_b37	rs113714998	Ovary	ISG15	ENSG00000187608.5	3	3	0.0122951	1.72063e-06
1_1266505_G_T_b37	rs113667724	Ovary	ISG15	ENSG00000187608.5	3	3	0.0122951	1.72063e-06
1_1270049_T_G_b37	rs113534227	Ovary	ISG15	ENSG00000187608.5	3	3	0.0122951	1.72063e-06
1_1337837_A_G_b37	rs1240709	Whole_Blood	TNFRSF18	ENSG00000186891.9	161	207	0.280488	2.76754e-05
1_1387213_G_A_b37	rs3899060	Whole_Blood	ISG15	ENSG00000187608.5	11	11	0.0149051	2.70859e-05
1_1426098_G_A_b37	rs112579524	Pancreas	ISG15	ENSG00000187608.5	9	9	0.0204545	9.961e-06
1_1523376_G_A_b37	rs188614075	Whole_Blood	TNFRSF18	ENSG00000186891.9	7	7	0.00948509	2.53617e-05
1_1533479_C_G_b37	rs28737320	Stomach	ISG15	ENSG00000187608.5	16	18	0.0379747	1.18513e-05
1_15718366_T_G_b37	rs78844823	Artery_Tibial	ARHGEF19	ENSG00000142632.12	31	31	0.0399485	1.44061e-05
1_15718366_T_G_b37	rs78844823	Colon_Transverse	ARHGEF19	ENSG00000142632.12	24	24	0.0487805	1.66781e-06
1_15725651_T_G_b37	rs12754930	Artery_Tibial	ARHGEF19	ENSG00000142632.12	42	42	0.0541237	5.0845e-06
1_15847609_G_A_b37	rs148555368	Esophagus_Gastroesophageal_Junction	ARHGEF19	ENSG00000142632.12	12	12	0.028169	4.23121e-06
1_15847609_G_A_b37	rs148555368	Colon_Transverse	ARHGEF19	ENSG00000142632.12	16	16	0.0325203	2.27027e-05
1_15919641_T_A_b37	rs59860889	Esophagus_Gastroesophageal_Junction	ARHGEF19	ENSG00000142632.12	92	103	0.264103	2.9962e-05
1_15939634_C_T_b37	rs148845907	Esophagus_Gastroesophageal_Junction	ARHGEF19	ENSG00000142632.12	12	12	0.028169	4.23121e-06
1_16056674_G_A_b37	rs143985490	Esophagus_Gastroesophageal_Junction	ARHGEF19	ENSG00000142632.12	14	14	0.0328638	1.30324e-06
1_16056674_G_A_b37	rs143985490	Colon_Transverse	ARHGEF19	ENSG00000142632.12	16	16	0.0325203	8.96595e-06
1_16056674_G_A_b37	rs143985490	Colon_Sigmoid	ARHGEF19	ENSG00000142632.12	13	13	0.0320197	2.01469e-05
1_16079818_T_G_b37	rs6681468	Thyroid	ARHGEF19	ENSG00000142632.12	72	80	0.100251	7.53353e-05
1_16125637_C_T_b37	rs1466871	Thyroid	ARHGEF19	ENSG00000142632.12	13	15	0.018797	2.18404e-05
1_16183106_A_G_b37	rs147432361	Esophagus_Mucosa	ARHGEF19	ENSG00000142632.12	20	20	0.0289017	5.27143e-06
1_16377935_A_G_b37	rs6650117	Esophagus_Muscularis	ARHGEF19	ENSG00000142632.12	79	82	0.122388	3.52728e-06
1_16380560_G_A_b37	rs10803413	Colon_Sigmoid	ARHGEF19	ENSG00000142632.12	143	191	0.470443	9.95137e-06
1_16380560_G_A_b37	rs10803413	Nerve_Tibial	ARHGEF19	ENSG00000142632.12	255	325	0.450139	1.60595e-05
1_16380582_C_T_b37	rs10803414	Nerve_Tibial	ARHGEF19	ENSG00000142632.12	252	321	0.444598	1.15816e-05
1_16380582_C_T_b37	rs10803414	Colon_Sigmoid	ARHGEF19	ENSG00000142632.12	143	190	0.46798	1.20209e-05
1_16380869_A_C_b37	rs34077924	Colon_Sigmoid	ARHGEF19	ENSG00000142632.12	144	195	0.480296	4.56738e-06
1_16380869_A_C_b37	rs34077924	Nerve_Tibial	ARHGEF19	ENSG00000142632.12	258	331	0.458449	1.26149e-05
1_16381208_T_G_b37	rs3768291	Nerve_Tibial	ARHGEF19	ENSG00000142632.12	254	324	0.448753	9.28357e-06
1_16381208_T_G_b37	rs3768291	Colon_Sigmoid	ARHGEF19	ENSG00000142632.12	143	191	0.470443	2.38093e-05
1_16381220_C_T_b37	rs3768290	Colon_Sigmoid	ARHGEF19	ENSG00000142632.12	143	191	0.470443	2.38093e-05
1_16381220_C_T_b37	rs3768290	Nerve_Tibial	ARHGEF19	ENSG00000142632.12	254	324	0.448753	9.28357e-06
1_16381579_A_G_b37	rs12047064	Nerve_Tibial	ARHGEF19	ENSG00000142632.12	247	316	0.438889	9.97074e-06
1_16381623_G_A_b37	rs12022144	Nerve_Tibial	ARHGEF19	ENSG00000142632.12	252	322	0.448468	8.91195e-06
1_16381623_G_A_b37	rs12022144	Colon_Sigmoid	ARHGEF19	ENSG00000142632.12	142	190	0.470297	2.28189e-05
1_16381722_C_T_b37	rs12691552	Colon_Sigmoid	ARHGEF19	ENSG00000142632.12	141	188	0.465347	1.92215e-05
1_16381722_C_T_b37	rs12691552	Nerve_Tibial	ARHGEF19	ENSG00000142632.12	250	319	0.443056	6.19188e-06
1_16381792_T_A_b37	rs12047858	Colon_Sigmoid	ARHGEF19	ENSG00000142632.12	143	191	0.470443	2.38093e-05
1_16381792_T_A_b37	rs12047858	Nerve_Tibial	ARHGEF19	ENSG00000142632.12	254	324	0.448753	9.28357e-06
1_16381816_C_T_b37	rs12029508	Nerve_Tibial	ARHGEF19	ENSG00000142632.12	254	324	0.448753	9.28357e-06
1_16381816_C_T_b37	rs12029508	Colon_Sigmoid	ARHGEF19	ENSG00000142632.12	143	191	0.470443	2.38093e-05
1_16382086_C_T_b37	rs2297727	Colon_Sigmoid	ARHGEF19	ENSG00000142632.12	143	191	0.470443	2.38093e-05
1_16382086_C_T_b37	rs2297727	Nerve_Tibial	ARHGEF19	ENSG00000142632.12	253	323	0.447368	1.13415e-05
1_16382505_T_C_b37	rs12691553	Nerve_Tibial	ARHGEF19	ENSG00000142632.12	246	314	0.434903	3.01432e-05
1_16382584_T_C_b37	rs12756545	Colon_Sigmoid	ARHGEF19	ENSG00000142632.12	145	195	0.480296	4.30615e-06
1_16382584_T_C_b37	rs12756545	Nerve_Tibial	ARHGEF19	ENSG00000142632.12	256	328	0.454294	5.58279e-06
1_16382649_T_C_b37	rs12756714	Nerve_Tibial	ARHGEF19	ENSG00000142632.12	252	324	0.45	3.5228e-06
1_16382649_T_C_b37	rs12756714	Muscle_Skeletal	ARHGEF19	ENSG00000142632.12	333	434	0.441955	4.71369e-05
1_16382649_T_C_b37	rs12756714	Colon_Sigmoid	ARHGEF19	ENSG00000142632.12	143	192	0.475248	5.11359e-06
1_16382718_T_C_b37	rs12048851	Colon_Sigmoid	ARHGEF19	ENSG00000142632.12	144	195	0.482673	5.94601e-06
1_16382718_T_C_b37	rs12048851	Nerve_Tibial	ARHGEF19	ENSG00000142632.12	256	329	0.456944	1.64936e-05
1_16382730_C_T_b37	rs12030469	Colon_Sigmoid	ARHGEF19	ENSG00000142632.12	143	193	0.475369	9.65534e-06
1_16382730_C_T_b37	rs12030469	Nerve_Tibial	ARHGEF19	ENSG00000142632.12	254	325	0.451389	9.94618e-06
1_16382791_G_C_b37	rs12023153	Nerve_Tibial	ARHGEF19	ENSG00000142632.12	254	325	0.450139	1.76625e-05
1_16382791_G_C_b37	rs12023153	Colon_Sigmoid	ARHGEF19	ENSG00000142632.12	143	193	0.475369	5.29436e-06
1_16382827_CTCT_C_b37	rs777516414	Muscle_Skeletal	ARHGEF19	ENSG00000142632.12	319	413	0.421429	4.27666e-05
1_16382827_CTCT_C_b37	rs777516414	Nerve_Tibial	ARHGEF19	ENSG00000142632.12	243	308	0.426593	4.59495e-06
1_16382831_T_A_b37	rs61769890	Nerve_Tibial	ARHGEF19	ENSG00000142632.12	243	308	0.426593	4.59495e-06
1_16382831_T_A_b37	rs61769890	Muscle_Skeletal	ARHGEF19	ENSG00000142632.12	319	413	0.421429	4.27666e-05
1_16382834_T_A_b37	rs61769891	Nerve_Tibial	ARHGEF19	ENSG00000142632.12	243	308	0.426593	4.59495e-06
1_16382834_T_A_b37	rs61769891	Muscle_Skeletal	ARHGEF19	ENSG00000142632.12	319	413	0.421429	4.27666e-05
1_16383974_G_T_b37	rs12144211	Artery_Tibial	ARHGEF19	ENSG00000142632.12	145	159	0.207031	1.61415e-05
1_16384353_T_C_b37	rs2863442	Artery_Tibial	ARHGEF19	ENSG00000142632.12	192	211	0.278364	2.07067e-05
1_16384784_A_G_b37	rs2019490	Artery_Tibial	ARHGEF19	ENSG00000142632.12	156	172	0.231806	3.50403e-05
1_16384801_C_T_b37	rs6656097	Colon_Sigmoid	ARHGEF19	ENSG00000142632.12	146	182	0.461929	6.11684e-07
1_16385323_A_G_b37	rs77017249	Artery_Tibial	ARHGEF19	ENSG00000142632.12	161	168	0.222812	3.71589e-05
1_16385330_G_T_b37	rs3978476	Artery_Tibial	ARHGEF19	ENSG00000142632.12	160	167	0.221485	5.76572e-05
1_16387402_C_G_b37	rs10927898	Colon_Sigmoid	ARHGEF19	ENSG00000142632.12	141	189	0.465517	1.13616e-05
1_16387402_C_G_b37	rs10927898	Nerve_Tibial	ARHGEF19	ENSG00000142632.12	247	316	0.437673	1.02795e-06
1_16387466_G_A_b37	rs9442233	Muscle_Skeletal	ARHGEF19	ENSG00000142632.12	341	450	0.459184	4.42402e-05
1_16387466_G_A_b37	rs9442233	Nerve_Tibial	ARHGEF19	ENSG00000142632.12	256	338	0.469444	3.33054e-05
1_16387469_A_G_b37	rs10927899	Nerve_Tibial	ARHGEF19	ENSG00000142632.12	256	338	0.469444	3.33054e-05
1_16387469_A_G_b37	rs10927899	Muscle_Skeletal	ARHGEF19	ENSG00000142632.12	340	449	0.4591	4.50946e-05
1_16387573_G_A_b37	rs11799874	Muscle_Skeletal	ARHGEF19	ENSG00000142632.12	334	430	0.437882	1.49386e-05
1_16387573_G_A_b37	rs11799874	Nerve_Tibial	ARHGEF19	ENSG00000142632.12	252	321	0.444598	4.07575e-07
1_16387781_AG_A_b37	rs796526028	Nerve_Tibial	ARHGEF19	ENSG00000142632.12	265	352	0.488889	5.49603e-05
1_16388565_C_G_b37	rs7524413	Nerve_Tibial	ARHGEF19	ENSG00000142632.12	240	299	0.415278	9.69222e-07
1_16388565_C_G_b37	rs7524413	Muscle_Skeletal	ARHGEF19	ENSG00000142632.12	311	396	0.406571	2.46374e-05
1_16388709_G_T_b37	rs28570004	Nerve_Tibial	ARHGEF19	ENSG00000142632.12	240	273	0.40625	1.74532e-06
1_16388737_G_A_b37	rs3978468	Skin_Not_Sun_Exposed_Suprapubic	ARHGEF19	ENSG00000142632.12	164	187	0.282477	4.81512e-05
1_16390813_T_C_b37	rs1414499	Skin_Sun_Exposed_Lower_leg	ARHGEF19	ENSG00000142632.12	298	393	0.474638	6.02009e-05
1_16390988_G_A_b37	rs1414500	Skin_Sun_Exposed_Lower_leg	ARHGEF19	ENSG00000142632.12	301	399	0.481884	5.2772e-05
1_16395029_G_T_b37	rs10803419	Skin_Sun_Exposed_Lower_leg	ARHGEF19	ENSG00000142632.12	300	407	0.492736	4.49259e-05
1_16395590_A_G_b37	rs9442199	Muscle_Skeletal	ARHGEF19	ENSG00000142632.12	291	356	0.362525	5.81639e-05
1_16396318_G_A_b37	rs9442236	Muscle_Skeletal	ARHGEF19	ENSG00000142632.12	225	261	0.265784	3.52998e-05
1_16398375_T_C_b37	rs9442200	Muscle_Skeletal	ARHGEF19	ENSG00000142632.12	311	388	0.395112	2.21143e-05
1_16400384_C_A_b37	rs7537484	Muscle_Skeletal	ARHGEF19	ENSG00000142632.12	299	374	0.382413	3.40586e-05
1_16402932_C_T_b37	rs9442213	Muscle_Skeletal	ARHGEF19	ENSG00000142632.12	220	253	0.258163	3.66525e-05
1_16406162_T_C_b37	rs28695308	Nerve_Tibial	ARHGEF19	ENSG00000142632.12	252	335	0.463989	5.08495e-06
1_16408031_C_T_b37	rs28420337	Muscle_Skeletal	ARHGEF19	ENSG00000142632.12	228	264	0.268839	1.68639e-05
1_16408809_T_A_b37	rs4077112	Nerve_Tibial	ARHGEF19	ENSG00000142632.12	253	335	0.463989	7.54264e-06
1_16412200_T_TG_b37	rs143344983	Artery_Tibial	ARHGEF19	ENSG00000142632.12	55	60	0.0773196	5.60379e-06
1_16414291_T_C_b37	rs28533461	Muscle_Skeletal	ARHGEF19	ENSG00000142632.12	280	336	0.342159	4.10951e-05
1_16414497_C_T_b37	rs56673124	Artery_Tibial	ARHGEF19	ENSG00000142632.12	51	55	0.0708763	3.15844e-05
1_16414784_G_A_b37	rs28501650	Nerve_Tibial	ARHGEF19	ENSG00000142632.12	241	314	0.434903	1.93014e-05
1_16415767_G_T_b37	rs28460456	Nerve_Tibial	ARHGEF19	ENSG00000142632.12	261	351	0.48615	2.40353e-05
1_16415896_C_T_b37	rs78403305	Artery_Tibial	ARHGEF19	ENSG00000142632.12	48	52	0.0671835	2.80733e-05
1_16416482_T_C_b37	rs61769915	Nerve_Tibial	ARHGEF19	ENSG00000142632.12	241	315	0.436288	1.74853e-05
1_16417171_A_G_b37	rs74606131	Artery_Tibial	ARHGEF19	ENSG00000142632.12	56	61	0.0786082	9.2208e-06
1_16423793_G_A_b37	rs57140322	Artery_Tibial	ARHGEF19	ENSG00000142632.12	47	52	0.0670103	5.2556e-05
1_16428911_C_G_b37	rs60511527	Artery_Tibial	ARHGEF19	ENSG00000142632.12	47	52	0.0670103	5.2556e-05
1_16432913_C_T_b37	rs113655353	Artery_Tibial	ARHGEF19	ENSG00000142632.12	40	44	0.056701	3.08854e-05
1_16433182_G_C_b37	rs60223320	Artery_Tibial	ARHGEF19	ENSG00000142632.12	50	57	0.0734536	2.24376e-05
1_16444282_T_C_b37	rs9943200	Muscle_Skeletal	ARHGEF19	ENSG00000142632.12	273	325	0.330957	9.40947e-06
1_16446349_G_A_b37	rs924201	Muscle_Skeletal	ARHGEF19	ENSG00000142632.12	320	417	0.424644	4.85706e-05
1_16449746_C_T_b37	rs11260711	Muscle_Skeletal	ARHGEF19	ENSG00000142632.12	215	247	0.251527	3.18876e-05
1_16451767_G_A_b37	rs3754334	Muscle_Skeletal	ARHGEF19	ENSG00000142632.12	213	243	0.247454	2.56926e-05
1_16452201_A_G_b37	rs11800805	Muscle_Skeletal	ARHGEF19	ENSG00000142632.12	259	317	0.322811	2.01704e-05
1_16453171_C_T_b37	rs1566147	Muscle_Skeletal	ARHGEF19	ENSG00000142632.12	233	272	0.277551	1.1368e-05
1_16453216_T_A_b37	rs1566146	Muscle_Skeletal	ARHGEF19	ENSG00000142632.12	233	272	0.276986	9.85148e-06
1_16460696_G_A_b37	rs115292598	Adipose_Visceral_Omentum	ARHGEF19	ENSG00000142632.12	33	33	0.0527157	1.21961e-05
1_16460696_G_A_b37	rs115292598	Muscle_Skeletal	ARHGEF19	ENSG00000142632.12	57	57	0.0580448	1.76135e-05
1_16460696_G_A_b37	rs115292598	Esophagus_Gastroesophageal_Junction	ARHGEF19	ENSG00000142632.12	26	26	0.0610329	3.23619e-05
1_16460696_G_A_b37	rs115292598	Adipose_Subcutaneous	ARHGEF19	ENSG00000142632.12	43	43	0.0558442	1.50933e-05
1_16460696_G_A_b37	rs115292598	Artery_Aorta	ARHGEF19	ENSG00000142632.12	29	29	0.0543071	2.68494e-07
1_16460696_G_A_b37	rs115292598	Nerve_Tibial	ARHGEF19	ENSG00000142632.12	34	34	0.0470914	3.47116e-05
1_16467391_C_T_b37	rs12084478	Artery_Tibial	ARHGEF19	ENSG00000142632.12	230	297	0.382732	2.62803e-05
1_16467645_T_G_b37	rs3820609	Artery_Tibial	ARHGEF19	ENSG00000142632.12	242	317	0.408505	4.23332e-05
1_16467924_G_T_b37	rs3768293	Artery_Tibial	ARHGEF19	ENSG00000142632.12	243	318	0.409794	4.15023e-05
1_16474701_G_A_b37	rs6603867	Artery_Tibial	ARHGEF19	ENSG00000142632.12	231	301	0.387887	5.17906e-05
1_16474839_AC_A_b37	rs35127370	Artery_Tibial	ARHGEF19	ENSG00000142632.12	231	301	0.387887	5.17906e-05
1_16476243_C_T_b37	rs71640097	Artery_Tibial	ARHGEF19	ENSG00000142632.12	21	21	0.0270619	4.99523e-05
1_16476243_C_T_b37	rs71640097	Adipose_Subcutaneous	ARHGEF19	ENSG00000142632.12	23	23	0.0298701	1.52376e-05
1_16481366_C_T_b37	rs61769950	Lung	ARHGEF19	ENSG00000142632.12	119	132	0.172324	1.49547e-05
1_16481366_C_T_b37	rs61769950	Whole_Blood	ARHGEF19	ENSG00000142632.12	108	120	0.162602	3.3187e-05
1_16481366_C_T_b37	rs61769950	Artery_Aorta	ARHGEF19	ENSG00000142632.12	82	91	0.170412	3.57915e-06
1_16481366_C_T_b37	rs61769950	Artery_Tibial	ARHGEF19	ENSG00000142632.12	119	131	0.168814	1.14739e-05
1_16481366_C_T_b37	rs61769950	Esophagus_Muscularis	ARHGEF19	ENSG00000142632.12	105	117	0.174627	2.85645e-06
1_16482976_A_G_b37	rs6603883	Cells_Transformed_fibroblasts	ARHGEF19	ENSG00000142632.12	185	239	0.398333	4.95589e-05
1_16485811_C_T_b37	rs11260822	Cells_Transformed_fibroblasts	ARHGEF19	ENSG00000142632.12	190	246	0.41	5.99453e-05
1_16486293_A_G_b37	rs4661710	Cells_Transformed_fibroblasts	ARHGEF19	ENSG00000142632.12	190	246	0.41	5.99453e-05
1_16489106_C_T_b37	rs729402	Artery_Tibial	ARHGEF19	ENSG00000142632.12	241	315	0.405928	1.17323e-05
1_16489106_C_T_b37	rs729402	Cells_Transformed_fibroblasts	ARHGEF19	ENSG00000142632.12	196	253	0.421667	5.2498e-05
1_16492021_T_C_b37	rs12408442	Artery_Tibial	ARHGEF19	ENSG00000142632.12	240	317	0.408505	3.92303e-05
1_16508629_A_G_b37	rs12723168	Adipose_Subcutaneous	ARHGEF19	ENSG00000142632.12	34	35	0.0454545	5.47283e-08
1_16508629_A_G_b37	rs12723168	Nerve_Tibial	ARHGEF19	ENSG00000142632.12	30	31	0.0429363	3.53008e-07
1_16508629_A_G_b37	rs12723168	Muscle_Skeletal	ARHGEF19	ENSG00000142632.12	43	44	0.0448065	6.56351e-07
1_16508629_A_G_b37	rs12723168	Artery_Tibial	ARHGEF19	ENSG00000142632.12	31	32	0.0412371	1.82631e-06
1_16509695_A_G_b37	rs12058819	Muscle_Skeletal	ARHGEF19	ENSG00000142632.12	58	60	0.0610998	3.83508e-07
1_16509695_A_G_b37	rs12058819	Cells_Transformed_fibroblasts	ARHGEF19	ENSG00000142632.12	35	35	0.0583333	2.00929e-07
1_16509695_A_G_b37	rs12058819	Artery_Tibial	ARHGEF19	ENSG00000142632.12	45	47	0.060567	1.89613e-07
1_16509695_A_G_b37	rs12058819	Adipose_Subcutaneous	ARHGEF19	ENSG00000142632.12	45	47	0.061039	9.84422e-08
1_16509695_A_G_b37	rs12058819	Nerve_Tibial	ARHGEF19	ENSG00000142632.12	39	41	0.0567867	5.65595e-06
1_16510894_C_T_b37	rs36086195	Artery_Tibial	ARHGEF19	ENSG00000142632.12	263	364	0.469072	5.50366e-05
1_16511198_G_A_b37	rs72889767	Artery_Tibial	ARHGEF19	ENSG00000142632.12	43	44	0.056701	2.69049e-05
1_16511198_G_A_b37	rs72889767	Nerve_Tibial	ARHGEF19	ENSG00000142632.12	38	39	0.0540166	5.18645e-05
1_16511198_G_A_b37	rs72889767	Cells_Transformed_fibroblasts	ARHGEF19	ENSG00000142632.12	33	33	0.055	4.28704e-05
1_16511198_G_A_b37	rs72889767	Muscle_Skeletal	ARHGEF19	ENSG00000142632.12	56	57	0.0580448	1.30256e-05
1_16511198_G_A_b37	rs72889767	Adipose_Subcutaneous	ARHGEF19	ENSG00000142632.12	46	47	0.061039	2.5628e-06
1_16512134_G_A_b37	rs151160967	Esophagus_Muscularis	ARHGEF19	ENSG00000142632.12	20	20	0.03003	4.29295e-05
1_16512134_G_A_b37	rs151160967	Adipose_Subcutaneous	ARHGEF19	ENSG00000142632.12	25	26	0.0338542	9.86878e-06
1_16512134_G_A_b37	rs151160967	Artery_Tibial	ARHGEF19	ENSG00000142632.12	21	22	0.0283505	5.64816e-06
1_16512310_G_A_b37	rs140232916	Spleen	ARHGEF19	ENSG00000142632.12	16	20	0.0689655	1.27219e-05
1_16512310_G_A_b37	rs140232916	Esophagus_Muscularis	ARHGEF19	ENSG00000142632.12	39	43	0.0641791	5.28141e-08
1_16512310_G_A_b37	rs140232916	Lung	ARHGEF19	ENSG00000142632.12	41	44	0.0575916	1.04934e-05
1_16512310_G_A_b37	rs140232916	Esophagus_Gastroesophageal_Junction	ARHGEF19	ENSG00000142632.12	27	30	0.0707547	5.06046e-06
1_16512310_G_A_b37	rs140232916	Adipose_Subcutaneous	ARHGEF19	ENSG00000142632.12	48	53	0.0690104	1.00571e-08
1_16512310_G_A_b37	rs140232916	Heart_Left_Ventricle	ARHGEF19	ENSG00000142632.12	33	35	0.0643382	2.45261e-06
1_16512310_G_A_b37	rs140232916	Nerve_Tibial	ARHGEF19	ENSG00000142632.12	46	50	0.0694444	1.34461e-07
1_16512310_G_A_b37	rs140232916	Colon_Transverse	ARHGEF19	ENSG00000142632.12	33	36	0.0734694	2.50735e-05
1_16512310_G_A_b37	rs140232916	Muscle_Skeletal	ARHGEF19	ENSG00000142632.12	60	66	0.0673469	1.48858e-05
1_16512310_G_A_b37	rs140232916	Artery_Tibial	ARHGEF19	ENSG00000142632.12	45	49	0.0631443	2.67747e-09
1_16512310_G_A_b37	rs140232916	Adipose_Visceral_Omentum	ARHGEF19	ENSG00000142632.12	42	47	0.0753205	4.58457e-07
1_16512310_G_A_b37	rs140232916	Cells_Transformed_fibroblasts	ARHGEF19	ENSG00000142632.12	35	38	0.0633333	1.0782e-08
1_16512310_G_A_b37	rs140232916	Small_Intestine_Terminal_Ileum	ARHGEF19	ENSG00000142632.12	18	20	0.0819672	1.12422e-05
1_16512391_C_T_b37	rs55837406	Artery_Aorta	ARHGEF19	ENSG00000142632.12	37	40	0.0749064	9.35802e-06
1_16513746_T_C_b37	rs11260929	Colon_Transverse	ARHGEF19	ENSG00000142632.12	79	98	0.2	3.13641e-07
1_16513746_T_C_b37	rs11260929	Colon_Sigmoid	ARHGEF19	ENSG00000142632.12	60	75	0.185644	7.08007e-06
1_16513746_T_C_b37	rs11260929	Artery_Aorta	ARHGEF19	ENSG00000142632.12	73	91	0.172348	3.979e-08
1_16513746_T_C_b37	rs11260929	Esophagus_Muscularis	ARHGEF19	ENSG00000142632.12	102	128	0.192192	5.10049e-12
1_16513746_T_C_b37	rs11260929	Adipose_Visceral_Omentum	ARHGEF19	ENSG00000142632.12	94	117	0.186901	3.45664e-10
1_16513746_T_C_b37	rs11260929	Nerve_Tibial	ARHGEF19	ENSG00000142632.12	107	134	0.18663	1.29484e-11
1_16513746_T_C_b37	rs11260929	Brain_Cerebellum	ARHGEF19	ENSG00000142632.12	45	54	0.176471	6.08641e-07
1_16513746_T_C_b37	rs11260929	Esophagus_Gastroesophageal_Junction	ARHGEF19	ENSG00000142632.12	67	86	0.201878	1.58626e-08
1_16513746_T_C_b37	rs11260929	Spleen	ARHGEF19	ENSG00000142632.12	51	68	0.232877	2.40397e-06
1_16513746_T_C_b37	rs11260929	Lung	ARHGEF19	ENSG00000142632.12	103	127	0.166667	5.90127e-09
1_16513746_T_C_b37	rs11260929	Cells_Transformed_fibroblasts	ARHGEF19	ENSG00000142632.12	93	118	0.198653	6.94446e-14
1_16513746_T_C_b37	rs11260929	Artery_Tibial	ARHGEF19	ENSG00000142632.12	116	147	0.190415	1.43927e-14
1_16513746_T_C_b37	rs11260929	Adipose_Subcutaneous	ARHGEF19	ENSG00000142632.12	122	155	0.20235	1.49877e-14
1_16513746_T_C_b37	rs11260929	Heart_Atrial_Appendage	ARHGEF19	ENSG00000142632.12	70	92	0.174905	4.61702e-08
1_16513746_T_C_b37	rs11260929	Small_Intestine_Terminal_Ileum	ARHGEF19	ENSG00000142632.12	42	55	0.22541	4.11481e-08
1_16513746_T_C_b37	rs11260929	Esophagus_Mucosa	ARHGEF19	ENSG00000142632.12	109	138	0.19382	5.80082e-07
1_16513746_T_C_b37	rs11260929	Whole_Blood	ARHGEF19	ENSG00000142632.12	113	144	0.196721	1.53841e-07
1_16513746_T_C_b37	rs11260929	Heart_Left_Ventricle	ARHGEF19	ENSG00000142632.12	81	103	0.190037	8.25079e-09
1_16513746_T_C_b37	rs11260929	Muscle_Skeletal	ARHGEF19	ENSG00000142632.12	151	193	0.197746	1.65226e-11
1_16513746_T_C_b37	rs11260929	Brain_Cortex	ARHGEF19	ENSG00000142632.12	40	50	0.185185	5.90488e-07
1_16513926_A_G_b37	rs924204	Artery_Tibial	ARHGEF19	ENSG00000142632.12	254	347	0.447165	5.25844e-06
1_16514343_A_G_b37	rs11260930	Colon_Sigmoid	ARHGEF19	ENSG00000142632.12	135	177	0.435961	1.85863e-05
1_16514343_A_G_b37	rs11260930	Thyroid	ARHGEF19	ENSG00000142632.12	263	357	0.447368	2.48751e-05
1_16514343_A_G_b37	rs11260930	Cells_Transformed_fibroblasts	ARHGEF19	ENSG00000142632.12	200	258	0.43	2.32525e-16
1_16514343_A_G_b37	rs11260930	Liver	ARHGEF19	ENSG00000142632.12	100	133	0.434641	1.13278e-05
1_16514343_A_G_b37	rs11260930	Colon_Transverse	ARHGEF19	ENSG00000142632.12	164	219	0.445122	1.1211e-05
1_16514343_A_G_b37	rs11260930	Artery_Aorta	ARHGEF19	ENSG00000142632.12	178	241	0.451311	4.50004e-21
1_16514343_A_G_b37	rs11260930	Nerve_Tibial	ARHGEF19	ENSG00000142632.12	244	331	0.458449	2.35715e-07
1_16514343_A_G_b37	rs11260930	Esophagus_Muscularis	ARHGEF19	ENSG00000142632.12	227	301	0.449254	1.73768e-11
1_16514343_A_G_b37	rs11260930	Testis	ARHGEF19	ENSG00000142632.12	149	200	0.444444	2.88431e-07
1_16514343_A_G_b37	rs11260930	Heart_Atrial_Appendage	ARHGEF19	ENSG00000142632.12	186	251	0.475379	2.17971e-06
1_16514343_A_G_b37	rs11260930	Lung	ARHGEF19	ENSG00000142632.12	261	354	0.462141	5.72892e-08
1_16514343_A_G_b37	rs11260930	Artery_Tibial	ARHGEF19	ENSG00000142632.12	266	356	0.458763	6.69847e-27
1_16514343_A_G_b37	rs11260930	Whole_Blood	ARHGEF19	ENSG00000142632.12	252	331	0.448509	3.8988e-06
1_16514343_A_G_b37	rs11260930	Adipose_Subcutaneous	ARHGEF19	ENSG00000142632.12	260	343	0.445455	1.03934e-09
1_16514343_A_G_b37	rs11260930	Heart_Left_Ventricle	ARHGEF19	ENSG00000142632.12	187	261	0.479779	1.32652e-05
1_16514343_A_G_b37	rs11260930	Artery_Coronary	ARHGEF19	ENSG00000142632.12	99	140	0.460526	3.33169e-08
1_16514369_A_G_b37	rs4661721	Esophagus_Gastroesophageal_Junction	ARHGEF19	ENSG00000142632.12	45	54	0.126761	1.01756e-05
1_16514369_A_G_b37	rs4661721	Nerve_Tibial	ARHGEF19	ENSG00000142632.12	74	86	0.119114	2.65685e-07
1_16514369_A_G_b37	rs4661721	Spleen	ARHGEF19	ENSG00000142632.12	30	40	0.136986	7.72224e-07
1_16514369_A_G_b37	rs4661721	Small_Intestine_Terminal_Ileum	ARHGEF19	ENSG00000142632.12	27	31	0.127049	2.10118e-07
1_16514369_A_G_b37	rs4661721	Colon_Transverse	ARHGEF19	ENSG00000142632.12	52	60	0.121951	1.95421e-07
1_16514369_A_G_b37	rs4661721	Lung	ARHGEF19	ENSG00000142632.12	66	77	0.100522	2.36905e-06
1_16514369_A_G_b37	rs4661721	Esophagus_Muscularis	ARHGEF19	ENSG00000142632.12	69	82	0.122388	1.03618e-10
1_16514369_A_G_b37	rs4661721	Artery_Aorta	ARHGEF19	ENSG00000142632.12	51	60	0.11236	2.21689e-06
1_16514369_A_G_b37	rs4661721	Adipose_Visceral_Omentum	ARHGEF19	ENSG00000142632.12	65	77	0.123003	4.32668e-09
1_16514369_A_G_b37	rs4661721	Heart_Left_Ventricle	ARHGEF19	ENSG00000142632.12	59	69	0.126838	2.2274e-06
1_16514369_A_G_b37	rs4661721	Testis	ARHGEF19	ENSG00000142632.12	42	49	0.108889	4.49367e-05
1_16514369_A_G_b37	rs4661721	Adipose_Subcutaneous	ARHGEF19	ENSG00000142632.12	75	84	0.109091	1.4161e-08
1_16514369_A_G_b37	rs4661721	Cells_Transformed_fibroblasts	ARHGEF19	ENSG00000142632.12	64	76	0.126667	1.62832e-11
1_16514369_A_G_b37	rs4661721	Artery_Tibial	ARHGEF19	ENSG00000142632.12	74	85	0.109536	6.21985e-11
1_16514369_A_G_b37	rs4661721	Whole_Blood	ARHGEF19	ENSG00000142632.12	74	87	0.117886	2.46752e-06
1_16514369_A_G_b37	rs4661721	Muscle_Skeletal	ARHGEF19	ENSG00000142632.12	97	112	0.114053	1.94348e-05
1_16514898_C_T_b37	rs61771381	Stomach	ARHGEF19	ENSG00000142632.12	50	53	0.111814	5.71289e-06
1_16514898_C_T_b37	rs61771381	Heart_Atrial_Appendage	ARHGEF19	ENSG00000142632.12	59	64	0.121212	4.92469e-12
1_16514898_C_T_b37	rs61771381	Brain_Caudate_basal_ganglia	ARHGEF19	ENSG00000142632.12	29	31	0.107639	4.45582e-06
1_16514898_C_T_b37	rs61771381	Adipose_Subcutaneous	ARHGEF19	ENSG00000142632.12	78	86	0.111688	8.88094e-16
1_16514898_C_T_b37	rs61771381	Colon_Transverse	ARHGEF19	ENSG00000142632.12	53	58	0.117886	1.3551e-14
1_16514898_C_T_b37	rs61771381	Spleen	ARHGEF19	ENSG00000142632.12	28	30	0.10274	3.75471e-06
1_16514898_C_T_b37	rs61771381	Nerve_Tibial	ARHGEF19	ENSG00000142632.12	68	75	0.103878	8.96888e-21
1_16514898_C_T_b37	rs61771381	Whole_Blood	ARHGEF19	ENSG00000142632.12	75	82	0.111111	4.60645e-14
1_16514898_C_T_b37	rs61771381	Esophagus_Muscularis	ARHGEF19	ENSG00000142632.12	69	75	0.11194	6.60748e-27
1_16514898_C_T_b37	rs61771381	Colon_Sigmoid	ARHGEF19	ENSG00000142632.12	40	45	0.110837	5.05775e-09
1_16514898_C_T_b37	rs61771381	Testis	ARHGEF19	ENSG00000142632.12	44	49	0.108889	5.26305e-11
1_16514898_C_T_b37	rs61771381	Lung	ARHGEF19	ENSG00000142632.12	86	95	0.124021	1.03978e-21
1_16514898_C_T_b37	rs61771381	Artery_Aorta	ARHGEF19	ENSG00000142632.12	58	65	0.121723	4.30341e-26
1_16514898_C_T_b37	rs61771381	Brain_Cortex	ARHGEF19	ENSG00000142632.12	27	29	0.106618	1.76495e-05
1_16514898_C_T_b37	rs61771381	Brain_Amygdala	ARHGEF19	ENSG00000142632.12	24	26	0.147727	2.30567e-06
1_16514898_C_T_b37	rs61771381	Liver	ARHGEF19	ENSG00000142632.12	35	39	0.127451	2.5536e-08
1_16514898_C_T_b37	rs61771381	Heart_Left_Ventricle	ARHGEF19	ENSG00000142632.12	59	63	0.115809	1.06542e-16
1_16514898_C_T_b37	rs61771381	Breast_Mammary_Tissue	ARHGEF19	ENSG00000142632.12	49	53	0.105578	4.44419e-11
1_16514898_C_T_b37	rs61771381	Cells_Transformed_fibroblasts	ARHGEF19	ENSG00000142632.12	64	69	0.115	9.96788e-18
1_16514898_C_T_b37	rs61771381	Artery_Tibial	ARHGEF19	ENSG00000142632.12	80	87	0.112113	2.3503e-21
1_16514898_C_T_b37	rs61771381	Esophagus_Gastroesophageal_Junction	ARHGEF19	ENSG00000142632.12	41	46	0.107981	3.00565e-12
1_16514898_C_T_b37	rs61771381	Muscle_Skeletal	ARHGEF19	ENSG00000142632.12	99	108	0.10998	7.3198e-13
1_16514898_C_T_b37	rs61771381	Adipose_Visceral_Omentum	ARHGEF19	ENSG00000142632.12	65	70	0.111821	4.84714e-16
1_16514898_C_T_b37	rs61771381	Brain_Cerebellar_Hemisphere	ARHGEF19	ENSG00000142632.12	29	30	0.12	4.7945e-07
1_16514898_C_T_b37	rs61771381	Skin_Sun_Exposed_Lower_leg	ARHGEF19	ENSG00000142632.12	81	87	0.105072	6.96007e-06
1_16514898_C_T_b37	rs61771381	Brain_Cerebellum	ARHGEF19	ENSG00000142632.12	32	33	0.107143	1.04808e-10
1_16514898_C_T_b37	rs61771381	Artery_Coronary	ARHGEF19	ENSG00000142632.12	31	33	0.108553	1.35182e-09
1_16514898_C_T_b37	rs61771381	Brain_Anterior_cingulate_cortex_BA24	ARHGEF19	ENSG00000142632.12	22	22	0.100917	9.77306e-06
1_16515060_C_CT_b37	rs397758815	Nerve_Tibial	ARHGEF19	ENSG00000142632.12	146	171	0.236842	2.74276e-08
1_16515060_C_CT_b37	rs397758815	Adrenal_Gland	ARHGEF19	ENSG00000142632.12	77	89	0.254286	4.45175e-06
1_16515060_C_CT_b37	rs397758815	Esophagus_Mucosa	ARHGEF19	ENSG00000142632.12	149	169	0.236034	4.93053e-07
1_16515060_C_CT_b37	rs397758815	Esophagus_Muscularis	ARHGEF19	ENSG00000142632.12	142	160	0.238806	2.36349e-08
1_16515060_C_CT_b37	rs397758815	Ovary	ARHGEF19	ENSG00000142632.12	53	61	0.25	5.32831e-07
1_16515060_C_CT_b37	rs397758815	Adipose_Subcutaneous	ARHGEF19	ENSG00000142632.12	152	172	0.223377	9.26013e-09
1_16515060_C_CT_b37	rs397758815	Colon_Transverse	ARHGEF19	ENSG00000142632.12	103	114	0.231707	1.06342e-05
1_16515060_C_CT_b37	rs397758815	Breast_Mammary_Tissue	ARHGEF19	ENSG00000142632.12	103	122	0.243028	1.72257e-07
1_16515060_C_CT_b37	rs397758815	Lung	ARHGEF19	ENSG00000142632.12	162	186	0.24282	2.83872e-07
1_16515060_C_CT_b37	rs397758815	Whole_Blood	ARHGEF19	ENSG00000142632.12	152	174	0.235772	3.19035e-05
1_16515060_C_CT_b37	rs397758815	Esophagus_Gastroesophageal_Junction	ARHGEF19	ENSG00000142632.12	87	99	0.232394	1.13419e-05
1_16515060_C_CT_b37	rs397758815	Skin_Not_Sun_Exposed_Suprapubic	ARHGEF19	ENSG00000142632.12	138	160	0.238806	2.48406e-05
1_16515060_C_CT_b37	rs397758815	Muscle_Skeletal	ARHGEF19	ENSG00000142632.12	206	237	0.241344	2.95611e-12
1_16515060_C_CT_b37	rs397758815	Heart_Left_Ventricle	ARHGEF19	ENSG00000142632.12	99	110	0.202206	2.04271e-05
1_16515060_C_CT_b37	rs397758815	Adipose_Visceral_Omentum	ARHGEF19	ENSG00000142632.12	135	156	0.249201	3.21341e-11
1_16515805_T_C_b37	rs6656611	Artery_Tibial	ARHGEF19	ENSG00000142632.12	252	337	0.434278	5.64289e-07
1_16515805_T_C_b37	rs6656611	Cells_Transformed_fibroblasts	ARHGEF19	ENSG00000142632.12	205	268	0.446667	2.52557e-05
1_16515879_C_T_b37	rs12740413	Spleen	ARHGEF19	ENSG00000142632.12	51	67	0.231034	1.01103e-08
1_16515879_C_T_b37	rs12740413	Heart_Atrial_Appendage	ARHGEF19	ENSG00000142632.12	77	95	0.180608	1.17033e-08
1_16515879_C_T_b37	rs12740413	Colon_Sigmoid	ARHGEF19	ENSG00000142632.12	66	79	0.194581	1.44216e-07
1_16515879_C_T_b37	rs12740413	Colon_Transverse	ARHGEF19	ENSG00000142632.12	89	108	0.219512	1.19152e-10
1_16515879_C_T_b37	rs12740413	Adipose_Subcutaneous	ARHGEF19	ENSG00000142632.12	130	162	0.21039	1.41894e-19
1_16515879_C_T_b37	rs12740413	Nerve_Tibial	ARHGEF19	ENSG00000142632.12	118	144	0.2	2.43329e-13
1_16515879_C_T_b37	rs12740413	Whole_Blood	ARHGEF19	ENSG00000142632.12	124	154	0.209239	4.81583e-09
1_16515879_C_T_b37	rs12740413	Esophagus_Muscularis	ARHGEF19	ENSG00000142632.12	112	139	0.207463	9.95535e-16
1_16515879_C_T_b37	rs12740413	Liver	ARHGEF19	ENSG00000142632.12	48	60	0.196078	1.19804e-06
1_16515879_C_T_b37	rs12740413	Pancreas	ARHGEF19	ENSG00000142632.12	75	96	0.219178	2.24946e-06
1_16515879_C_T_b37	rs12740413	Small_Intestine_Terminal_Ileum	ARHGEF19	ENSG00000142632.12	46	60	0.247934	1.76965e-11
1_16515879_C_T_b37	rs12740413	Cells_Transformed_fibroblasts	ARHGEF19	ENSG00000142632.12	101	123	0.206376	2.91568e-16
1_16515879_C_T_b37	rs12740413	Esophagus_Mucosa	ARHGEF19	ENSG00000142632.12	120	150	0.210084	8.8783e-11
1_16515879_C_T_b37	rs12740413	Adipose_Visceral_Omentum	ARHGEF19	ENSG00000142632.12	100	120	0.192308	4.64916e-14
1_16515879_C_T_b37	rs12740413	Esophagus_Gastroesophageal_Junction	ARHGEF19	ENSG00000142632.12	71	88	0.207547	3.76343e-11
1_16515879_C_T_b37	rs12740413	Lung	ARHGEF19	ENSG00000142632.12	112	134	0.175853	8.46482e-12
1_16515879_C_T_b37	rs12740413	Artery_Tibial	ARHGEF19	ENSG00000142632.12	128	159	0.205426	4.17814e-15
1_16515879_C_T_b37	rs12740413	Breast_Mammary_Tissue	ARHGEF19	ENSG00000142632.12	83	100	0.2	3.2794e-07
1_16515879_C_T_b37	rs12740413	Heart_Left_Ventricle	ARHGEF19	ENSG00000142632.12	85	106	0.195572	6.08012e-10
1_16515879_C_T_b37	rs12740413	Artery_Aorta	ARHGEF19	ENSG00000142632.12	80	100	0.18797	1.47164e-10
1_16515879_C_T_b37	rs12740413	Cells_EBV-transformed_lymphocytes	ARHGEF19	ENSG00000142632.12	51	60	0.25641	4.36023e-06
1_16515879_C_T_b37	rs12740413	Muscle_Skeletal	ARHGEF19	ENSG00000142632.12	164	206	0.209776	8.68135e-15
1_16515879_C_T_b37	rs12740413	Brain_Cortex	ARHGEF19	ENSG00000142632.12	42	49	0.181481	1.50749e-08
1_16515879_C_T_b37	rs12740413	Brain_Cerebellum	ARHGEF19	ENSG00000142632.12	50	57	0.186275	2.92096e-08
1_16515903_TG_T_b37	rs398049136	Colon_Transverse	ARHGEF19	ENSG00000142632.12	102	113	0.229675	8.01082e-06
1_16515903_TG_T_b37	rs398049136	Skin_Not_Sun_Exposed_Suprapubic	ARHGEF19	ENSG00000142632.12	137	159	0.237313	2.83762e-05
1_16515903_TG_T_b37	rs398049136	Whole_Blood	ARHGEF19	ENSG00000142632.12	151	173	0.234417	2.40999e-05
1_16515903_TG_T_b37	rs398049136	Ovary	ARHGEF19	ENSG00000142632.12	52	60	0.245902	7.29368e-07
1_16515903_TG_T_b37	rs398049136	Nerve_Tibial	ARHGEF19	ENSG00000142632.12	145	170	0.235457	1.58526e-08
1_16515903_TG_T_b37	rs398049136	Adrenal_Gland	ARHGEF19	ENSG00000142632.12	76	88	0.251429	1.95454e-05
1_16515903_TG_T_b37	rs398049136	Heart_Left_Ventricle	ARHGEF19	ENSG00000142632.12	98	109	0.200368	1.41651e-05
1_16515903_TG_T_b37	rs398049136	Breast_Mammary_Tissue	ARHGEF19	ENSG00000142632.12	102	121	0.241036	6.45462e-08
1_16515903_TG_T_b37	rs398049136	Muscle_Skeletal	ARHGEF19	ENSG00000142632.12	205	236	0.240326	1.14179e-12
1_16515903_TG_T_b37	rs398049136	Esophagus_Gastroesophageal_Junction	ARHGEF19	ENSG00000142632.12	86	98	0.230047	4.82866e-06
1_16515903_TG_T_b37	rs398049136	Adipose_Visceral_Omentum	ARHGEF19	ENSG00000142632.12	135	156	0.249201	3.21341e-11
1_16515903_TG_T_b37	rs398049136	Adipose_Subcutaneous	ARHGEF19	ENSG00000142632.12	151	171	0.222078	6.26072e-09
1_16515903_TG_T_b37	rs398049136	Esophagus_Mucosa	ARHGEF19	ENSG00000142632.12	148	168	0.234637	8.81422e-07
1_16515903_TG_T_b37	rs398049136	Lung	ARHGEF19	ENSG00000142632.12	161	185	0.241514	2.24426e-07
1_16515903_TG_T_b37	rs398049136	Esophagus_Muscularis	ARHGEF19	ENSG00000142632.12	141	159	0.237313	1.1108e-08
1_16516110_G_A_b37	rs6671165	Artery_Tibial	ARHGEF19	ENSG00000142632.12	251	336	0.435233	3.96289e-07
1_16516110_G_A_b37	rs6671165	Cells_Transformed_fibroblasts	ARHGEF19	ENSG00000142632.12	204	267	0.446488	2.55318e-05
1_16516527_G_A_b37	rs6704422	Colon_Transverse	ARHGEF19	ENSG00000142632.12	102	113	0.230612	1.37656e-05
1_16516527_G_A_b37	rs6704422	Whole_Blood	ARHGEF19	ENSG00000142632.12	151	173	0.234417	3.00594e-05
1_16516527_G_A_b37	rs6704422	Skin_Not_Sun_Exposed_Suprapubic	ARHGEF19	ENSG00000142632.12	136	158	0.236527	2.86971e-05
1_16516527_G_A_b37	rs6704422	Nerve_Tibial	ARHGEF19	ENSG00000142632.12	145	170	0.236111	3.3152e-08
1_16516527_G_A_b37	rs6704422	Muscle_Skeletal	ARHGEF19	ENSG00000142632.12	205	236	0.240816	3.17669e-12
1_16516527_G_A_b37	rs6704422	Breast_Mammary_Tissue	ARHGEF19	ENSG00000142632.12	102	121	0.241036	3.66907e-07
1_16516527_G_A_b37	rs6704422	Adipose_Visceral_Omentum	ARHGEF19	ENSG00000142632.12	135	156	0.249201	3.21341e-11
1_16516527_G_A_b37	rs6704422	Adrenal_Gland	ARHGEF19	ENSG00000142632.12	77	89	0.254286	4.45175e-06
1_16516527_G_A_b37	rs6704422	Esophagus_Mucosa	ARHGEF19	ENSG00000142632.12	148	168	0.235294	4.68561e-07
1_16516527_G_A_b37	rs6704422	Adipose_Subcutaneous	ARHGEF19	ENSG00000142632.12	151	171	0.222656	1.15316e-08
1_16516527_G_A_b37	rs6704422	Ovary	ARHGEF19	ENSG00000142632.12	53	61	0.25	5.32831e-07
1_16516527_G_A_b37	rs6704422	Esophagus_Gastroesophageal_Junction	ARHGEF19	ENSG00000142632.12	85	97	0.228774	9.57917e-06
1_16516527_G_A_b37	rs6704422	Heart_Left_Ventricle	ARHGEF19	ENSG00000142632.12	99	110	0.202206	2.04271e-05
1_16516527_G_A_b37	rs6704422	Lung	ARHGEF19	ENSG00000142632.12	160	184	0.240838	2.66922e-07
1_16516527_G_A_b37	rs6704422	Esophagus_Muscularis	ARHGEF19	ENSG00000142632.12	140	158	0.236527	1.80926e-08
1_16516585_T_C_b37	rs6690317	Artery_Tibial	ARHGEF19	ENSG00000142632.12	252	337	0.434278	5.64289e-07
1_16516585_T_C_b37	rs6690317	Cells_Transformed_fibroblasts	ARHGEF19	ENSG00000142632.12	205	268	0.446667	2.52557e-05
1_16516859_C_T_b37	rs6683033	Nerve_Tibial	ARHGEF19	ENSG00000142632.12	145	170	0.235457	1.58526e-08
1_16516859_C_T_b37	rs6683033	Whole_Blood	ARHGEF19	ENSG00000142632.12	150	172	0.233062	2.27427e-05
1_16516859_C_T_b37	rs6683033	Esophagus_Mucosa	ARHGEF19	ENSG00000142632.12	148	168	0.234637	8.81422e-07
1_16516859_C_T_b37	rs6683033	Colon_Transverse	ARHGEF19	ENSG00000142632.12	102	114	0.231707	5.00449e-06
1_16516859_C_T_b37	rs6683033	Heart_Left_Ventricle	ARHGEF19	ENSG00000142632.12	98	109	0.200368	1.41651e-05
1_16516859_C_T_b37	rs6683033	Adipose_Visceral_Omentum	ARHGEF19	ENSG00000142632.12	135	156	0.249201	3.21341e-11
1_16516859_C_T_b37	rs6683033	Ovary	ARHGEF19	ENSG00000142632.12	52	60	0.245902	7.29368e-07
1_16516859_C_T_b37	rs6683033	Esophagus_Muscularis	ARHGEF19	ENSG00000142632.12	140	158	0.235821	5.99019e-09
1_16516859_C_T_b37	rs6683033	Skin_Not_Sun_Exposed_Suprapubic	ARHGEF19	ENSG00000142632.12	136	158	0.235821	2.42273e-05
1_16516859_C_T_b37	rs6683033	Adrenal_Gland	ARHGEF19	ENSG00000142632.12	76	88	0.251429	1.95454e-05
1_16516859_C_T_b37	rs6683033	Breast_Mammary_Tissue	ARHGEF19	ENSG00000142632.12	101	121	0.241036	1.21892e-07
1_16516859_C_T_b37	rs6683033	Muscle_Skeletal	ARHGEF19	ENSG00000142632.12	205	236	0.240326	1.14179e-12
1_16516859_C_T_b37	rs6683033	Adipose_Subcutaneous	ARHGEF19	ENSG00000142632.12	151	171	0.222078	6.26072e-09
1_16516859_C_T_b37	rs6683033	Lung	ARHGEF19	ENSG00000142632.12	160	184	0.240209	2.44705e-07
1_16516859_C_T_b37	rs6683033	Esophagus_Gastroesophageal_Junction	ARHGEF19	ENSG00000142632.12	85	97	0.2277	4.80389e-06
1_16517178_A_G_b37	rs10218517	Nerve_Tibial	ARHGEF19	ENSG00000142632.12	158	191	0.266017	2.60023e-10
1_16517178_A_G_b37	rs10218517	Whole_Blood	ARHGEF19	ENSG00000142632.12	165	193	0.263661	3.17262e-07
1_16517178_A_G_b37	rs10218517	Adipose_Subcutaneous	ARHGEF19	ENSG00000142632.12	169	199	0.260471	7.68737e-11
1_16517178_A_G_b37	rs10218517	Ovary	ARHGEF19	ENSG00000142632.12	59	72	0.297521	2.1778e-06
1_16517178_A_G_b37	rs10218517	Esophagus_Muscularis	ARHGEF19	ENSG00000142632.12	153	178	0.266467	5.54855e-09
1_16517178_A_G_b37	rs10218517	Colon_Transverse	ARHGEF19	ENSG00000142632.12	113	130	0.265306	1.41216e-07
1_16517178_A_G_b37	rs10218517	Esophagus_Gastroesophageal_Junction	ARHGEF19	ENSG00000142632.12	94	107	0.252358	3.70247e-06
1_16517178_A_G_b37	rs10218517	Adrenal_Gland	ARHGEF19	ENSG00000142632.12	86	101	0.288571	1.60015e-05
1_16517178_A_G_b37	rs10218517	Heart_Left_Ventricle	ARHGEF19	ENSG00000142632.12	109	126	0.232472	3.96326e-07
1_16517178_A_G_b37	rs10218517	Lung	ARHGEF19	ENSG00000142632.12	170	197	0.259211	9.97231e-07
1_16517178_A_G_b37	rs10218517	Adipose_Visceral_Omentum	ARHGEF19	ENSG00000142632.12	144	170	0.273312	4.38081e-11
1_16517178_A_G_b37	rs10218517	Muscle_Skeletal	ARHGEF19	ENSG00000142632.12	225	266	0.273663	4.95468e-14
1_16517178_A_G_b37	rs10218517	Small_Intestine_Terminal_Ileum	ARHGEF19	ENSG00000142632.12	66	76	0.311475	1.27181e-06
1_16517178_A_G_b37	rs10218517	Breast_Mammary_Tissue	ARHGEF19	ENSG00000142632.12	109	133	0.269231	5.14285e-07
1_16517465_A_C_b37	rs2132852	Esophagus_Gastroesophageal_Junction	ARHGEF19	ENSG00000142632.12	96	110	0.258216	9.00089e-07
1_16517465_A_C_b37	rs2132852	Ovary	ARHGEF19	ENSG00000142632.12	60	74	0.303279	3.12213e-06
1_16517465_A_C_b37	rs2132852	Adipose_Visceral_Omentum	ARHGEF19	ENSG00000142632.12	144	171	0.274038	3.97458e-11
1_16517465_A_C_b37	rs2132852	Lung	ARHGEF19	ENSG00000142632.12	174	203	0.265013	8.45958e-07
1_16517465_A_C_b37	rs2132852	Heart_Left_Ventricle	ARHGEF19	ENSG00000142632.12	111	129	0.237132	4.50634e-07
1_16517465_A_C_b37	rs2132852	Esophagus_Muscularis	ARHGEF19	ENSG00000142632.12	155	179	0.267964	4.98767e-09
1_16517465_A_C_b37	rs2132852	Nerve_Tibial	ARHGEF19	ENSG00000142632.12	161	196	0.271468	6.71313e-10
1_16517465_A_C_b37	rs2132852	Whole_Blood	ARHGEF19	ENSG00000142632.12	168	198	0.269022	6.92999e-07
1_16517465_A_C_b37	rs2132852	Muscle_Skeletal	ARHGEF19	ENSG00000142632.12	230	273	0.278571	4.31469e-13
1_16517465_A_C_b37	rs2132852	Adrenal_Gland	ARHGEF19	ENSG00000142632.12	87	102	0.291429	1.09487e-05
1_16517465_A_C_b37	rs2132852	Adipose_Subcutaneous	ARHGEF19	ENSG00000142632.12	172	203	0.264323	2.33084e-11
1_16517465_A_C_b37	rs2132852	Breast_Mammary_Tissue	ARHGEF19	ENSG00000142632.12	112	137	0.272908	4.72878e-07
1_16517465_A_C_b37	rs2132852	Small_Intestine_Terminal_Ileum	ARHGEF19	ENSG00000142632.12	66	76	0.311475	1.27181e-06
1_16517465_A_C_b37	rs2132852	Colon_Transverse	ARHGEF19	ENSG00000142632.12	113	130	0.265306	1.41431e-07
1_16517662_T_C_b37	rs12734223	Colon_Sigmoid	ARHGEF19	ENSG00000142632.12	61	67	0.165842	7.48939e-09
1_16517662_T_C_b37	rs12734223	Cells_EBV-transformed_lymphocytes	ARHGEF19	ENSG00000142632.12	45	50	0.213675	4.73726e-11
1_16517662_T_C_b37	rs12734223	Heart_Atrial_Appendage	ARHGEF19	ENSG00000142632.12	70	82	0.155303	1.31706e-08
1_16517662_T_C_b37	rs12734223	Liver	ARHGEF19	ENSG00000142632.12	45	50	0.163399	1.02904e-07
1_16517662_T_C_b37	rs12734223	Muscle_Skeletal	ARHGEF19	ENSG00000142632.12	147	169	0.172449	5.21432e-18
1_16517662_T_C_b37	rs12734223	Spleen	ARHGEF19	ENSG00000142632.12	46	56	0.191781	1.62346e-11
1_16517662_T_C_b37	rs12734223	Breast_Mammary_Tissue	ARHGEF19	ENSG00000142632.12	74	84	0.167331	2.23988e-07
1_16517662_T_C_b37	rs12734223	Esophagus_Muscularis	ARHGEF19	ENSG00000142632.12	102	117	0.17515	4.02744e-19
1_16517662_T_C_b37	rs12734223	Cells_Transformed_fibroblasts	ARHGEF19	ENSG00000142632.12	90	103	0.171667	1.68991e-24
1_16517662_T_C_b37	rs12734223	Esophagus_Mucosa	ARHGEF19	ENSG00000142632.12	108	125	0.17507	2.88899e-08
1_16517662_T_C_b37	rs12734223	Adipose_Visceral_Omentum	ARHGEF19	ENSG00000142632.12	91	104	0.166667	3.26597e-16
1_16517662_T_C_b37	rs12734223	Artery_Aorta	ARHGEF19	ENSG00000142632.12	74	85	0.159176	2.74896e-13
1_16517662_T_C_b37	rs12734223	Lung	ARHGEF19	ENSG00000142632.12	104	117	0.153141	1.72059e-10
1_16517662_T_C_b37	rs12734223	Testis	ARHGEF19	ENSG00000142632.12	63	71	0.157778	6.35927e-09
1_16517662_T_C_b37	rs12734223	Whole_Blood	ARHGEF19	ENSG00000142632.12	112	129	0.175272	1.00084e-12
1_16517662_T_C_b37	rs12734223	Nerve_Tibial	ARHGEF19	ENSG00000142632.12	104	119	0.165278	4.52181e-18
1_16517662_T_C_b37	rs12734223	Stomach	ARHGEF19	ENSG00000142632.12	75	84	0.177215	6.27695e-06
1_16517662_T_C_b37	rs12734223	Colon_Transverse	ARHGEF19	ENSG00000142632.12	79	90	0.182927	6.10346e-15
1_16517662_T_C_b37	rs12734223	Heart_Left_Ventricle	ARHGEF19	ENSG00000142632.12	76	88	0.161765	1.1315e-13
1_16517662_T_C_b37	rs12734223	Skin_Sun_Exposed_Lower_leg	ARHGEF19	ENSG00000142632.12	121	139	0.168281	2.15397e-05
1_16517662_T_C_b37	rs12734223	Esophagus_Gastroesophageal_Junction	ARHGEF19	ENSG00000142632.12	68	78	0.183099	2.15102e-12
1_16517662_T_C_b37	rs12734223	Artery_Tibial	ARHGEF19	ENSG00000142632.12	115	132	0.170543	6.15187e-22
1_16517662_T_C_b37	rs12734223	Brain_Cortex	ARHGEF19	ENSG00000142632.12	37	40	0.147059	2.32333e-06
1_16517662_T_C_b37	rs12734223	Brain_Cerebellar_Hemisphere	ARHGEF19	ENSG00000142632.12	37	39	0.157258	8.8209e-07
1_16517662_T_C_b37	rs12734223	Small_Intestine_Terminal_Ileum	ARHGEF19	ENSG00000142632.12	41	47	0.192623	4.20176e-15
1_16517662_T_C_b37	rs12734223	Adipose_Subcutaneous	ARHGEF19	ENSG00000142632.12	114	129	0.167969	1.69435e-24
1_16517662_T_C_b37	rs12734223	Brain_Cerebellum	ARHGEF19	ENSG00000142632.12	46	50	0.163399	1.00073e-07
1_16517721_G_C_b37	rs10796436	Esophagus_Muscularis	ARHGEF19	ENSG00000142632.12	140	158	0.235821	5.99019e-09
1_16517721_G_C_b37	rs10796436	Muscle_Skeletal	ARHGEF19	ENSG00000142632.12	205	236	0.240326	1.14179e-12
1_16517721_G_C_b37	rs10796436	Breast_Mammary_Tissue	ARHGEF19	ENSG00000142632.12	101	121	0.241036	1.21892e-07
1_16517721_G_C_b37	rs10796436	Ovary	ARHGEF19	ENSG00000142632.12	52	60	0.245902	7.29368e-07
1_16517721_G_C_b37	rs10796436	Adipose_Visceral_Omentum	ARHGEF19	ENSG00000142632.12	135	156	0.249201	3.21341e-11
1_16517721_G_C_b37	rs10796436	Nerve_Tibial	ARHGEF19	ENSG00000142632.12	145	170	0.235457	1.58526e-08
1_16517721_G_C_b37	rs10796436	Lung	ARHGEF19	ENSG00000142632.12	160	184	0.240209	2.44705e-07
1_16517721_G_C_b37	rs10796436	Skin_Not_Sun_Exposed_Suprapubic	ARHGEF19	ENSG00000142632.12	136	158	0.235821	2.42273e-05
1_16517721_G_C_b37	rs10796436	Whole_Blood	ARHGEF19	ENSG00000142632.12	150	172	0.233062	2.27427e-05
1_16517721_G_C_b37	rs10796436	Esophagus_Gastroesophageal_Junction	ARHGEF19	ENSG00000142632.12	85	97	0.2277	4.80389e-06
1_16517721_G_C_b37	rs10796436	Esophagus_Mucosa	ARHGEF19	ENSG00000142632.12	148	168	0.234637	8.81422e-07
1_16517721_G_C_b37	rs10796436	Colon_Transverse	ARHGEF19	ENSG00000142632.12	102	114	0.231707	5.00449e-06
1_16517721_G_C_b37	rs10796436	Heart_Left_Ventricle	ARHGEF19	ENSG00000142632.12	98	109	0.200368	1.41651e-05
1_16517721_G_C_b37	rs10796436	Adrenal_Gland	ARHGEF19	ENSG00000142632.12	76	88	0.251429	1.95454e-05
1_16517721_G_C_b37	rs10796436	Adipose_Subcutaneous	ARHGEF19	ENSG00000142632.12	151	171	0.222078	6.26072e-09
1_16518027_T_A_b37	rs12023672	Skin_Not_Sun_Exposed_Suprapubic	ARHGEF19	ENSG00000142632.12	136	158	0.235821	2.42273e-05
1_16518027_T_A_b37	rs12023672	Esophagus_Gastroesophageal_Junction	ARHGEF19	ENSG00000142632.12	85	97	0.2277	4.80389e-06
1_16518027_T_A_b37	rs12023672	Whole_Blood	ARHGEF19	ENSG00000142632.12	150	172	0.233062	2.27427e-05
1_16518027_T_A_b37	rs12023672	Ovary	ARHGEF19	ENSG00000142632.12	52	60	0.245902	7.29368e-07
1_16518027_T_A_b37	rs12023672	Adrenal_Gland	ARHGEF19	ENSG00000142632.12	76	88	0.251429	1.95454e-05
1_16518027_T_A_b37	rs12023672	Muscle_Skeletal	ARHGEF19	ENSG00000142632.12	205	236	0.240326	1.14179e-12
1_16518027_T_A_b37	rs12023672	Esophagus_Mucosa	ARHGEF19	ENSG00000142632.12	148	168	0.234637	8.81422e-07
1_16518027_T_A_b37	rs12023672	Adipose_Visceral_Omentum	ARHGEF19	ENSG00000142632.12	135	156	0.249201	3.21341e-11
1_16518027_T_A_b37	rs12023672	Nerve_Tibial	ARHGEF19	ENSG00000142632.12	145	170	0.235457	1.58526e-08
1_16518027_T_A_b37	rs12023672	Esophagus_Muscularis	ARHGEF19	ENSG00000142632.12	140	158	0.235821	5.99019e-09
1_16518027_T_A_b37	rs12023672	Breast_Mammary_Tissue	ARHGEF19	ENSG00000142632.12	101	121	0.241036	1.21892e-07
1_16518027_T_A_b37	rs12023672	Colon_Transverse	ARHGEF19	ENSG00000142632.12	102	114	0.231707	5.00449e-06
1_16518027_T_A_b37	rs12023672	Adipose_Subcutaneous	ARHGEF19	ENSG00000142632.12	151	171	0.222078	6.26072e-09
1_16518027_T_A_b37	rs12023672	Lung	ARHGEF19	ENSG00000142632.12	160	184	0.240209	2.44705e-07
1_16518027_T_A_b37	rs12023672	Heart_Left_Ventricle	ARHGEF19	ENSG00000142632.12	98	109	0.200368	1.41651e-05
1_16518170_G_C_b37	rs12757462	Adipose_Subcutaneous	ARHGEF19	ENSG00000142632.12	151	171	0.222078	6.26072e-09
1_16518170_G_C_b37	rs12757462	Skin_Not_Sun_Exposed_Suprapubic	ARHGEF19	ENSG00000142632.12	136	158	0.235821	2.42273e-05
1_16518170_G_C_b37	rs12757462	Muscle_Skeletal	ARHGEF19	ENSG00000142632.12	205	236	0.240326	1.14179e-12
1_16518170_G_C_b37	rs12757462	Esophagus_Muscularis	ARHGEF19	ENSG00000142632.12	140	158	0.235821	5.99019e-09
1_16518170_G_C_b37	rs12757462	Esophagus_Mucosa	ARHGEF19	ENSG00000142632.12	148	168	0.234637	8.81422e-07
1_16518170_G_C_b37	rs12757462	Esophagus_Gastroesophageal_Junction	ARHGEF19	ENSG00000142632.12	85	97	0.2277	4.80389e-06
1_16518170_G_C_b37	rs12757462	Ovary	ARHGEF19	ENSG00000142632.12	52	60	0.245902	7.29368e-07
1_16518170_G_C_b37	rs12757462	Nerve_Tibial	ARHGEF19	ENSG00000142632.12	145	170	0.235457	1.58526e-08
1_16518170_G_C_b37	rs12757462	Heart_Left_Ventricle	ARHGEF19	ENSG00000142632.12	98	109	0.200368	1.41651e-05
1_16518170_G_C_b37	rs12757462	Adipose_Visceral_Omentum	ARHGEF19	ENSG00000142632.12	135	156	0.249201	3.21341e-11
1_16518170_G_C_b37	rs12757462	Whole_Blood	ARHGEF19	ENSG00000142632.12	150	172	0.233062	2.27427e-05
1_16518170_G_C_b37	rs12757462	Adrenal_Gland	ARHGEF19	ENSG00000142632.12	76	88	0.251429	1.95454e-05
1_16518170_G_C_b37	rs12757462	Lung	ARHGEF19	ENSG00000142632.12	160	184	0.240209	2.44705e-07
1_16518170_G_C_b37	rs12757462	Breast_Mammary_Tissue	ARHGEF19	ENSG00000142632.12	101	121	0.241036	1.21892e-07
1_16518170_G_C_b37	rs12757462	Colon_Transverse	ARHGEF19	ENSG00000142632.12	102	114	0.231707	5.00449e-06
1_16518284_C_T_b37	rs12726942	Esophagus_Mucosa	ARHGEF19	ENSG00000142632.12	148	168	0.234637	8.81422e-07
1_16518284_C_T_b37	rs12726942	Ovary	ARHGEF19	ENSG00000142632.12	52	60	0.245902	7.29368e-07
1_16518284_C_T_b37	rs12726942	Breast_Mammary_Tissue	ARHGEF19	ENSG00000142632.12	101	121	0.241036	1.21892e-07
1_16518284_C_T_b37	rs12726942	Nerve_Tibial	ARHGEF19	ENSG00000142632.12	145	170	0.235457	1.58526e-08
1_16518284_C_T_b37	rs12726942	Skin_Not_Sun_Exposed_Suprapubic	ARHGEF19	ENSG00000142632.12	136	158	0.235821	2.42273e-05
1_16518284_C_T_b37	rs12726942	Adrenal_Gland	ARHGEF19	ENSG00000142632.12	76	88	0.251429	1.95454e-05
1_16518284_C_T_b37	rs12726942	Esophagus_Muscularis	ARHGEF19	ENSG00000142632.12	140	158	0.235821	5.99019e-09
1_16518284_C_T_b37	rs12726942	Heart_Left_Ventricle	ARHGEF19	ENSG00000142632.12	98	109	0.200368	1.41651e-05
1_16518284_C_T_b37	rs12726942	Colon_Transverse	ARHGEF19	ENSG00000142632.12	102	114	0.231707	5.00449e-06
1_16518284_C_T_b37	rs12726942	Adipose_Subcutaneous	ARHGEF19	ENSG00000142632.12	151	171	0.222078	6.26072e-09
1_16518284_C_T_b37	rs12726942	Esophagus_Gastroesophageal_Junction	ARHGEF19	ENSG00000142632.12	85	97	0.2277	4.80389e-06
1_16518284_C_T_b37	rs12726942	Lung	ARHGEF19	ENSG00000142632.12	160	184	0.240209	2.44705e-07
1_16518284_C_T_b37	rs12726942	Muscle_Skeletal	ARHGEF19	ENSG00000142632.12	205	236	0.240326	1.14179e-12
1_16518284_C_T_b37	rs12726942	Adipose_Visceral_Omentum	ARHGEF19	ENSG00000142632.12	135	156	0.249201	3.21341e-11
1_16518284_C_T_b37	rs12726942	Whole_Blood	ARHGEF19	ENSG00000142632.12	150	172	0.233062	2.27427e-05
1_16518385_T_C_b37	rs56139236	Esophagus_Gastroesophageal_Junction	ARHGEF19	ENSG00000142632.12	85	97	0.2277	4.80389e-06
1_16518385_T_C_b37	rs56139236	Colon_Transverse	ARHGEF19	ENSG00000142632.12	102	114	0.231707	5.00449e-06
1_16518385_T_C_b37	rs56139236	Esophagus_Mucosa	ARHGEF19	ENSG00000142632.12	148	168	0.234637	8.81422e-07
1_16518385_T_C_b37	rs56139236	Ovary	ARHGEF19	ENSG00000142632.12	52	60	0.245902	7.29368e-07
1_16518385_T_C_b37	rs56139236	Adipose_Subcutaneous	ARHGEF19	ENSG00000142632.12	151	171	0.222078	6.26072e-09
1_16518385_T_C_b37	rs56139236	Breast_Mammary_Tissue	ARHGEF19	ENSG00000142632.12	101	121	0.241036	1.21892e-07
1_16518385_T_C_b37	rs56139236	Esophagus_Muscularis	ARHGEF19	ENSG00000142632.12	140	158	0.235821	5.99019e-09
1_16518385_T_C_b37	rs56139236	Adipose_Visceral_Omentum	ARHGEF19	ENSG00000142632.12	135	156	0.249201	3.21341e-11
1_16518385_T_C_b37	rs56139236	Nerve_Tibial	ARHGEF19	ENSG00000142632.12	145	170	0.235457	1.58526e-08
1_16518385_T_C_b37	rs56139236	Whole_Blood	ARHGEF19	ENSG00000142632.12	150	172	0.233062	2.27427e-05
1_16518385_T_C_b37	rs56139236	Skin_Not_Sun_Exposed_Suprapubic	ARHGEF19	ENSG00000142632.12	136	158	0.235821	2.42273e-05
1_16518385_T_C_b37	rs56139236	Muscle_Skeletal	ARHGEF19	ENSG00000142632.12	205	236	0.240326	1.14179e-12
1_16518385_T_C_b37	rs56139236	Heart_Left_Ventricle	ARHGEF19	ENSG00000142632.12	98	109	0.200368	1.41651e-05
1_16518385_T_C_b37	rs56139236	Adrenal_Gland	ARHGEF19	ENSG00000142632.12	76	88	0.251429	1.95454e-05
1_16518385_T_C_b37	rs56139236	Lung	ARHGEF19	ENSG00000142632.12	160	184	0.240209	2.44705e-07
1_16518386_A_T_b37	rs55942310	Lung	ARHGEF19	ENSG00000142632.12	160	184	0.240209	2.44705e-07
1_16518386_A_T_b37	rs55942310	Whole_Blood	ARHGEF19	ENSG00000142632.12	150	172	0.233062	2.27427e-05
1_16518386_A_T_b37	rs55942310	Ovary	ARHGEF19	ENSG00000142632.12	52	60	0.245902	7.29368e-07
1_16518386_A_T_b37	rs55942310	Esophagus_Muscularis	ARHGEF19	ENSG00000142632.12	140	158	0.235821	5.99019e-09
1_16518386_A_T_b37	rs55942310	Esophagus_Gastroesophageal_Junction	ARHGEF19	ENSG00000142632.12	85	97	0.2277	4.80389e-06
1_16518386_A_T_b37	rs55942310	Adipose_Visceral_Omentum	ARHGEF19	ENSG00000142632.12	135	156	0.249201	3.21341e-11
1_16518386_A_T_b37	rs55942310	Adipose_Subcutaneous	ARHGEF19	ENSG00000142632.12	151	171	0.222078	6.26072e-09
1_16518386_A_T_b37	rs55942310	Colon_Transverse	ARHGEF19	ENSG00000142632.12	102	114	0.231707	5.00449e-06
1_16518386_A_T_b37	rs55942310	Breast_Mammary_Tissue	ARHGEF19	ENSG00000142632.12	101	121	0.241036	1.21892e-07
1_16518386_A_T_b37	rs55942310	Skin_Not_Sun_Exposed_Suprapubic	ARHGEF19	ENSG00000142632.12	136	158	0.235821	2.42273e-05
1_16518386_A_T_b37	rs55942310	Muscle_Skeletal	ARHGEF19	ENSG00000142632.12	205	236	0.240326	1.14179e-12
1_16518386_A_T_b37	rs55942310	Esophagus_Mucosa	ARHGEF19	ENSG00000142632.12	148	168	0.234637	8.81422e-07
1_16518386_A_T_b37	rs55942310	Heart_Left_Ventricle	ARHGEF19	ENSG00000142632.12	98	109	0.200368	1.41651e-05
1_16518386_A_T_b37	rs55942310	Adrenal_Gland	ARHGEF19	ENSG00000142632.12	76	88	0.251429	1.95454e-05
1_16518386_A_T_b37	rs55942310	Nerve_Tibial	ARHGEF19	ENSG00000142632.12	145	170	0.235457	1.58526e-08
1_16518387_CCAGG_C_b37	rs111326960	Whole_Blood	ARHGEF19	ENSG00000142632.12	150	172	0.233062	2.27427e-05
1_16518387_CCAGG_C_b37	rs111326960	Heart_Left_Ventricle	ARHGEF19	ENSG00000142632.12	98	109	0.200368	1.41651e-05
1_16518387_CCAGG_C_b37	rs111326960	Colon_Transverse	ARHGEF19	ENSG00000142632.12	102	114	0.231707	5.00449e-06
1_16518387_CCAGG_C_b37	rs111326960	Adrenal_Gland	ARHGEF19	ENSG00000142632.12	76	88	0.251429	1.95454e-05
1_16518387_CCAGG_C_b37	rs111326960	Nerve_Tibial	ARHGEF19	ENSG00000142632.12	145	170	0.235457	1.58526e-08
1_16518387_CCAGG_C_b37	rs111326960	Adipose_Subcutaneous	ARHGEF19	ENSG00000142632.12	151	171	0.222078	6.26072e-09
1_16518387_CCAGG_C_b37	rs111326960	Lung	ARHGEF19	ENSG00000142632.12	160	184	0.240209	2.44705e-07
1_16518387_CCAGG_C_b37	rs111326960	Adipose_Visceral_Omentum	ARHGEF19	ENSG00000142632.12	135	156	0.249201	3.21341e-11
1_16518387_CCAGG_C_b37	rs111326960	Skin_Not_Sun_Exposed_Suprapubic	ARHGEF19	ENSG00000142632.12	136	158	0.235821	2.42273e-05
1_16518387_CCAGG_C_b37	rs111326960	Esophagus_Gastroesophageal_Junction	ARHGEF19	ENSG00000142632.12	85	97	0.2277	4.80389e-06
1_16518387_CCAGG_C_b37	rs111326960	Breast_Mammary_Tissue	ARHGEF19	ENSG00000142632.12	101	121	0.241036	1.21892e-07
1_16518387_CCAGG_C_b37	rs111326960	Esophagus_Muscularis	ARHGEF19	ENSG00000142632.12	140	158	0.235821	5.99019e-09
1_16518387_CCAGG_C_b37	rs111326960	Esophagus_Mucosa	ARHGEF19	ENSG00000142632.12	148	168	0.234637	8.81422e-07
1_16518387_CCAGG_C_b37	rs111326960	Muscle_Skeletal	ARHGEF19	ENSG00000142632.12	205	236	0.240326	1.14179e-12
1_16518387_CCAGG_C_b37	rs111326960	Ovary	ARHGEF19	ENSG00000142632.12	52	60	0.245902	7.29368e-07
1_16518402_A_G_b37	rs6702753	Esophagus_Gastroesophageal_Junction	ARHGEF19	ENSG00000142632.12	85	97	0.2277	4.80389e-06
1_16518402_A_G_b37	rs6702753	Heart_Left_Ventricle	ARHGEF19	ENSG00000142632.12	98	109	0.200368	1.41651e-05
1_16518402_A_G_b37	rs6702753	Colon_Transverse	ARHGEF19	ENSG00000142632.12	102	114	0.231707	5.00449e-06
1_16518402_A_G_b37	rs6702753	Adipose_Subcutaneous	ARHGEF19	ENSG00000142632.12	151	171	0.222078	6.26072e-09
1_16518402_A_G_b37	rs6702753	Lung	ARHGEF19	ENSG00000142632.12	160	184	0.240209	2.44705e-07
1_16518402_A_G_b37	rs6702753	Adrenal_Gland	ARHGEF19	ENSG00000142632.12	76	88	0.251429	1.95454e-05
1_16518402_A_G_b37	rs6702753	Adipose_Visceral_Omentum	ARHGEF19	ENSG00000142632.12	135	156	0.249201	3.21341e-11
1_16518402_A_G_b37	rs6702753	Whole_Blood	ARHGEF19	ENSG00000142632.12	150	172	0.233062	2.27427e-05
1_16518402_A_G_b37	rs6702753	Skin_Not_Sun_Exposed_Suprapubic	ARHGEF19	ENSG00000142632.12	136	158	0.235821	2.42273e-05
1_16518402_A_G_b37	rs6702753	Esophagus_Mucosa	ARHGEF19	ENSG00000142632.12	148	168	0.234637	8.81422e-07
1_16518402_A_G_b37	rs6702753	Esophagus_Muscularis	ARHGEF19	ENSG00000142632.12	140	158	0.235821	5.99019e-09
1_16518402_A_G_b37	rs6702753	Breast_Mammary_Tissue	ARHGEF19	ENSG00000142632.12	101	121	0.241036	1.21892e-07
1_16518402_A_G_b37	rs6702753	Nerve_Tibial	ARHGEF19	ENSG00000142632.12	145	170	0.235457	1.58526e-08
1_16518402_A_G_b37	rs6702753	Ovary	ARHGEF19	ENSG00000142632.12	52	60	0.245902	7.29368e-07
1_16518402_A_G_b37	rs6702753	Muscle_Skeletal	ARHGEF19	ENSG00000142632.12	205	236	0.240326	1.14179e-12
1_16518455_A_G_b37	rs6702773	Skin_Not_Sun_Exposed_Suprapubic	ARHGEF19	ENSG00000142632.12	136	158	0.235821	2.42273e-05
1_16518455_A_G_b37	rs6702773	Heart_Left_Ventricle	ARHGEF19	ENSG00000142632.12	98	109	0.200368	1.41651e-05
1_16518455_A_G_b37	rs6702773	Nerve_Tibial	ARHGEF19	ENSG00000142632.12	145	170	0.235457	1.58526e-08
1_16518455_A_G_b37	rs6702773	Adrenal_Gland	ARHGEF19	ENSG00000142632.12	76	88	0.251429	1.95454e-05
1_16518455_A_G_b37	rs6702773	Adipose_Visceral_Omentum	ARHGEF19	ENSG00000142632.12	135	156	0.249201	3.21341e-11
1_16518455_A_G_b37	rs6702773	Muscle_Skeletal	ARHGEF19	ENSG00000142632.12	205	236	0.240326	1.14179e-12
1_16518455_A_G_b37	rs6702773	Esophagus_Mucosa	ARHGEF19	ENSG00000142632.12	148	168	0.234637	8.81422e-07
1_16518455_A_G_b37	rs6702773	Breast_Mammary_Tissue	ARHGEF19	ENSG00000142632.12	101	121	0.241036	1.21892e-07
1_16518455_A_G_b37	rs6702773	Adipose_Subcutaneous	ARHGEF19	ENSG00000142632.12	151	171	0.222078	6.26072e-09
1_16518455_A_G_b37	rs6702773	Esophagus_Gastroesophageal_Junction	ARHGEF19	ENSG00000142632.12	85	97	0.2277	4.80389e-06
1_16518455_A_G_b37	rs6702773	Colon_Transverse	ARHGEF19	ENSG00000142632.12	102	114	0.231707	5.00449e-06
1_16518455_A_G_b37	rs6702773	Esophagus_Muscularis	ARHGEF19	ENSG00000142632.12	140	158	0.235821	5.99019e-09
1_16518455_A_G_b37	rs6702773	Whole_Blood	ARHGEF19	ENSG00000142632.12	150	172	0.233062	2.27427e-05
1_16518455_A_G_b37	rs6702773	Ovary	ARHGEF19	ENSG00000142632.12	52	60	0.245902	7.29368e-07
1_16518455_A_G_b37	rs6702773	Lung	ARHGEF19	ENSG00000142632.12	160	184	0.240209	2.44705e-07
1_16518512_A_C_b37	rs6702866	Adrenal_Gland	ARHGEF19	ENSG00000142632.12	76	88	0.251429	1.95454e-05
1_16518512_A_C_b37	rs6702866	Adipose_Subcutaneous	ARHGEF19	ENSG00000142632.12	150	169	0.220052	2.30404e-09
1_16518512_A_C_b37	rs6702866	Heart_Left_Ventricle	ARHGEF19	ENSG00000142632.12	98	109	0.200368	1.41651e-05
1_16518512_A_C_b37	rs6702866	Breast_Mammary_Tissue	ARHGEF19	ENSG00000142632.12	101	121	0.241036	1.21892e-07
1_16518512_A_C_b37	rs6702866	Adipose_Visceral_Omentum	ARHGEF19	ENSG00000142632.12	134	154	0.246795	3.22025e-11
1_16518512_A_C_b37	rs6702866	Skin_Not_Sun_Exposed_Suprapubic	ARHGEF19	ENSG00000142632.12	135	156	0.233533	1.49851e-05
1_16518512_A_C_b37	rs6702866	Lung	ARHGEF19	ENSG00000142632.12	160	184	0.240209	2.44705e-07
1_16518512_A_C_b37	rs6702866	Colon_Transverse	ARHGEF19	ENSG00000142632.12	101	112	0.228571	6.56584e-06
1_16518512_A_C_b37	rs6702866	Esophagus_Gastroesophageal_Junction	ARHGEF19	ENSG00000142632.12	85	97	0.2277	4.80389e-06
1_16518512_A_C_b37	rs6702866	Nerve_Tibial	ARHGEF19	ENSG00000142632.12	145	170	0.235457	1.58526e-08
1_16518512_A_C_b37	rs6702866	Esophagus_Muscularis	ARHGEF19	ENSG00000142632.12	139	156	0.233533	1.35832e-08
1_16518512_A_C_b37	rs6702866	Esophagus_Mucosa	ARHGEF19	ENSG00000142632.12	147	166	0.232493	4.33783e-07
1_16518512_A_C_b37	rs6702866	Muscle_Skeletal	ARHGEF19	ENSG00000142632.12	204	234	0.238776	1.07519e-12
1_16518512_A_C_b37	rs6702866	Whole_Blood	ARHGEF19	ENSG00000142632.12	149	170	0.230978	3.52015e-05
1_16518512_A_C_b37	rs6702866	Ovary	ARHGEF19	ENSG00000142632.12	52	60	0.245902	7.29368e-07
1_16518513_G_A_b37	rs6662702	Adrenal_Gland	ARHGEF19	ENSG00000142632.12	76	88	0.251429	1.95454e-05
1_16518513_G_A_b37	rs6662702	Esophagus_Mucosa	ARHGEF19	ENSG00000142632.12	147	166	0.232493	4.33783e-07
1_16518513_G_A_b37	rs6662702	Skin_Not_Sun_Exposed_Suprapubic	ARHGEF19	ENSG00000142632.12	135	156	0.233533	1.49851e-05
1_16518513_G_A_b37	rs6662702	Adipose_Visceral_Omentum	ARHGEF19	ENSG00000142632.12	134	154	0.246795	3.22025e-11
1_16518513_G_A_b37	rs6662702	Heart_Left_Ventricle	ARHGEF19	ENSG00000142632.12	98	109	0.200368	1.41651e-05
1_16518513_G_A_b37	rs6662702	Muscle_Skeletal	ARHGEF19	ENSG00000142632.12	204	234	0.238776	1.07519e-12
1_16518513_G_A_b37	rs6662702	Lung	ARHGEF19	ENSG00000142632.12	160	184	0.240209	2.44705e-07
1_16518513_G_A_b37	rs6662702	Adipose_Subcutaneous	ARHGEF19	ENSG00000142632.12	150	169	0.220052	2.30404e-09
1_16518513_G_A_b37	rs6662702	Breast_Mammary_Tissue	ARHGEF19	ENSG00000142632.12	101	121	0.241036	1.21892e-07
1_16518513_G_A_b37	rs6662702	Esophagus_Gastroesophageal_Junction	ARHGEF19	ENSG00000142632.12	85	97	0.2277	4.80389e-06
1_16518513_G_A_b37	rs6662702	Nerve_Tibial	ARHGEF19	ENSG00000142632.12	145	170	0.235457	1.58526e-08
1_16518513_G_A_b37	rs6662702	Colon_Transverse	ARHGEF19	ENSG00000142632.12	101	112	0.228571	6.56584e-06
1_16518513_G_A_b37	rs6662702	Esophagus_Muscularis	ARHGEF19	ENSG00000142632.12	139	156	0.233533	1.35832e-08
1_16518513_G_A_b37	rs6662702	Whole_Blood	ARHGEF19	ENSG00000142632.12	149	170	0.230978	3.52015e-05
1_16518513_G_A_b37	rs6662702	Ovary	ARHGEF19	ENSG00000142632.12	52	60	0.245902	7.29368e-07
1_16518583_C_A_b37	rs6689594	Breast_Mammary_Tissue	ARHGEF19	ENSG00000142632.12	102	122	0.243028	3.18212e-07
1_16518583_C_A_b37	rs6689594	Muscle_Skeletal	ARHGEF19	ENSG00000142632.12	206	237	0.241344	2.95611e-12
1_16518583_C_A_b37	rs6689594	Lung	ARHGEF19	ENSG00000142632.12	161	185	0.241514	3.10139e-07
1_16518583_C_A_b37	rs6689594	Skin_Not_Sun_Exposed_Suprapubic	ARHGEF19	ENSG00000142632.12	137	159	0.237313	2.11926e-05
1_16518583_C_A_b37	rs6689594	Heart_Left_Ventricle	ARHGEF19	ENSG00000142632.12	99	110	0.202206	2.04271e-05
1_16518583_C_A_b37	rs6689594	Adrenal_Gland	ARHGEF19	ENSG00000142632.12	77	89	0.254286	4.45175e-06
1_16518583_C_A_b37	rs6689594	Esophagus_Mucosa	ARHGEF19	ENSG00000142632.12	149	169	0.236034	4.93053e-07
1_16518583_C_A_b37	rs6689594	Adipose_Visceral_Omentum	ARHGEF19	ENSG00000142632.12	135	156	0.249201	3.21341e-11
1_16518583_C_A_b37	rs6689594	Esophagus_Muscularis	ARHGEF19	ENSG00000142632.12	141	159	0.237313	1.29791e-08
1_16518583_C_A_b37	rs6689594	Colon_Transverse	ARHGEF19	ENSG00000142632.12	103	115	0.23374	6.68383e-06
1_16518583_C_A_b37	rs6689594	Esophagus_Gastroesophageal_Junction	ARHGEF19	ENSG00000142632.12	86	98	0.230047	1.12293e-05
1_16518583_C_A_b37	rs6689594	Nerve_Tibial	ARHGEF19	ENSG00000142632.12	146	171	0.236842	2.74276e-08
1_16518583_C_A_b37	rs6689594	Adipose_Subcutaneous	ARHGEF19	ENSG00000142632.12	152	172	0.223377	9.26013e-09
1_16518583_C_A_b37	rs6689594	Whole_Blood	ARHGEF19	ENSG00000142632.12	151	173	0.234417	3.00594e-05
1_16518583_C_A_b37	rs6689594	Ovary	ARHGEF19	ENSG00000142632.12	53	61	0.25	5.32831e-07
1_16518716_A_G_b37	rs6703096	Lung	ARHGEF19	ENSG00000142632.12	161	185	0.241514	3.10139e-07
1_16518716_A_G_b37	rs6703096	Whole_Blood	ARHGEF19	ENSG00000142632.12	151	173	0.234417	3.00594e-05
1_16518716_A_G_b37	rs6703096	Skin_Not_Sun_Exposed_Suprapubic	ARHGEF19	ENSG00000142632.12	137	159	0.237313	2.11926e-05
1_16518716_A_G_b37	rs6703096	Heart_Left_Ventricle	ARHGEF19	ENSG00000142632.12	99	110	0.202206	2.04271e-05
1_16518716_A_G_b37	rs6703096	Nerve_Tibial	ARHGEF19	ENSG00000142632.12	146	171	0.236842	2.74276e-08
1_16518716_A_G_b37	rs6703096	Breast_Mammary_Tissue	ARHGEF19	ENSG00000142632.12	102	122	0.243028	3.18212e-07
1_16518716_A_G_b37	rs6703096	Esophagus_Muscularis	ARHGEF19	ENSG00000142632.12	141	159	0.237313	1.29791e-08
1_16518716_A_G_b37	rs6703096	Esophagus_Mucosa	ARHGEF19	ENSG00000142632.12	149	169	0.236034	4.93053e-07
1_16518716_A_G_b37	rs6703096	Adrenal_Gland	ARHGEF19	ENSG00000142632.12	77	89	0.254286	4.45175e-06
1_16518716_A_G_b37	rs6703096	Muscle_Skeletal	ARHGEF19	ENSG00000142632.12	206	237	0.241344	2.95611e-12
1_16518716_A_G_b37	rs6703096	Adipose_Subcutaneous	ARHGEF19	ENSG00000142632.12	152	172	0.223377	9.26013e-09
1_16518716_A_G_b37	rs6703096	Esophagus_Gastroesophageal_Junction	ARHGEF19	ENSG00000142632.12	86	98	0.230047	1.12293e-05
1_16518716_A_G_b37	rs6703096	Ovary	ARHGEF19	ENSG00000142632.12	53	61	0.25	5.32831e-07
1_16518716_A_G_b37	rs6703096	Adipose_Visceral_Omentum	ARHGEF19	ENSG00000142632.12	135	156	0.249201	3.21341e-11
1_16518716_A_G_b37	rs6703096	Colon_Transverse	ARHGEF19	ENSG00000142632.12	103	115	0.23374	6.68383e-06
1_16518748_T_A_b37	rs12024558	Cells_EBV-transformed_lymphocytes	ARHGEF19	ENSG00000142632.12	72	88	0.376068	1.44617e-06
1_16518748_T_A_b37	rs12024558	Muscle_Skeletal	ARHGEF19	ENSG00000142632.12	319	423	0.430754	2.3941e-05
1_16518748_T_A_b37	rs12024558	Whole_Blood	ARHGEF19	ENSG00000142632.12	241	320	0.433604	2.45779e-08
1_16518748_T_A_b37	rs12024558	Colon_Sigmoid	ARHGEF19	ENSG00000142632.12	133	178	0.438424	2.75677e-07
1_16518748_T_A_b37	rs12024558	Testis	ARHGEF19	ENSG00000142632.12	144	197	0.437778	2.73393e-09
1_16518748_T_A_b37	rs12024558	Artery_Aorta	ARHGEF19	ENSG00000142632.12	173	234	0.438202	1.10036e-25
1_16518748_T_A_b37	rs12024558	Nerve_Tibial	ARHGEF19	ENSG00000142632.12	237	324	0.448753	3.4544e-09
1_16518748_T_A_b37	rs12024558	Artery_Tibial	ARHGEF19	ENSG00000142632.12	256	346	0.445876	3.81694e-30
1_16518748_T_A_b37	rs12024558	Spleen	ARHGEF19	ENSG00000142632.12	81	112	0.383562	1.06609e-05
1_16518748_T_A_b37	rs12024558	Heart_Left_Ventricle	ARHGEF19	ENSG00000142632.12	183	260	0.477941	8.907e-09
1_16518748_T_A_b37	rs12024558	Lung	ARHGEF19	ENSG00000142632.12	253	345	0.450392	9.49799e-10
1_16518748_T_A_b37	rs12024558	Heart_Atrial_Appendage	ARHGEF19	ENSG00000142632.12	179	246	0.465909	3.74299e-09
1_16518748_T_A_b37	rs12024558	Thyroid	ARHGEF19	ENSG00000142632.12	257	354	0.443609	2.31021e-06
1_16518748_T_A_b37	rs12024558	Adipose_Visceral_Omentum	ARHGEF19	ENSG00000142632.12	202	272	0.434505	8.13007e-07
1_16518748_T_A_b37	rs12024558	Liver	ARHGEF19	ENSG00000142632.12	98	134	0.437909	2.38655e-08
1_16518748_T_A_b37	rs12024558	Cells_Transformed_fibroblasts	ARHGEF19	ENSG00000142632.12	196	255	0.425	4.97719e-22
1_16518748_T_A_b37	rs12024558	Colon_Transverse	ARHGEF19	ENSG00000142632.12	154	208	0.422764	2.22924e-08
1_16518748_T_A_b37	rs12024558	Adipose_Subcutaneous	ARHGEF19	ENSG00000142632.12	255	343	0.445455	4.49981e-12
1_16518748_T_A_b37	rs12024558	Artery_Coronary	ARHGEF19	ENSG00000142632.12	94	136	0.447368	1.14788e-08
1_16518748_T_A_b37	rs12024558	Esophagus_Gastroesophageal_Junction	ARHGEF19	ENSG00000142632.12	140	189	0.443662	3.90659e-07
1_16518748_T_A_b37	rs12024558	Esophagus_Muscularis	ARHGEF19	ENSG00000142632.12	217	292	0.435821	2.30382e-14
1_16518824_T_C_b37	rs72636554	Testis	ARHGEF19	ENSG00000142632.12	34	38	0.0844444	2.44548e-05
1_16518824_T_C_b37	rs72636554	Cells_Transformed_fibroblasts	ARHGEF19	ENSG00000142632.12	46	51	0.085	2.03843e-10
1_16518824_T_C_b37	rs72636554	Artery_Tibial	ARHGEF19	ENSG00000142632.12	56	61	0.0786082	3.29054e-12
1_16518824_T_C_b37	rs72636554	Whole_Blood	ARHGEF19	ENSG00000142632.12	56	61	0.0826558	1.46616e-06
1_16518824_T_C_b37	rs72636554	Adipose_Visceral_Omentum	ARHGEF19	ENSG00000142632.12	49	56	0.0894569	1.17783e-08
1_16518824_T_C_b37	rs72636554	Lung	ARHGEF19	ENSG00000142632.12	51	53	0.0691906	9.91821e-06
1_16518824_T_C_b37	rs72636554	Artery_Aorta	ARHGEF19	ENSG00000142632.12	35	38	0.071161	3.13647e-06
1_16518824_T_C_b37	rs72636554	Nerve_Tibial	ARHGEF19	ENSG00000142632.12	56	61	0.0844875	2.20303e-08
1_16518824_T_C_b37	rs72636554	Esophagus_Gastroesophageal_Junction	ARHGEF19	ENSG00000142632.12	33	39	0.0915493	4.99692e-07
1_16518824_T_C_b37	rs72636554	Heart_Left_Ventricle	ARHGEF19	ENSG00000142632.12	38	42	0.0772059	8.39822e-07
1_16518824_T_C_b37	rs72636554	Spleen	ARHGEF19	ENSG00000142632.12	20	24	0.0821918	2.71698e-07
1_16518824_T_C_b37	rs72636554	Small_Intestine_Terminal_Ileum	ARHGEF19	ENSG00000142632.12	23	27	0.110656	2.7634e-08
1_16518824_T_C_b37	rs72636554	Muscle_Skeletal	ARHGEF19	ENSG00000142632.12	74	82	0.0835031	1.1397e-05
1_16518824_T_C_b37	rs72636554	Adipose_Subcutaneous	ARHGEF19	ENSG00000142632.12	59	63	0.0818182	1.56747e-10
1_16518824_T_C_b37	rs72636554	Colon_Transverse	ARHGEF19	ENSG00000142632.12	43	47	0.0955285	3.10229e-07
1_16518824_T_C_b37	rs72636554	Esophagus_Muscularis	ARHGEF19	ENSG00000142632.12	50	57	0.0850746	6.57229e-09
1_16518866_T_G_b37	rs6697459	Adrenal_Gland	ARHGEF19	ENSG00000142632.12	77	89	0.254286	4.45175e-06
1_16518866_T_G_b37	rs6697459	Nerve_Tibial	ARHGEF19	ENSG00000142632.12	146	171	0.236842	2.74276e-08
1_16518866_T_G_b37	rs6697459	Esophagus_Mucosa	ARHGEF19	ENSG00000142632.12	149	169	0.236034	4.93053e-07
1_16518866_T_G_b37	rs6697459	Whole_Blood	ARHGEF19	ENSG00000142632.12	151	173	0.234417	3.00594e-05
1_16518866_T_G_b37	rs6697459	Skin_Not_Sun_Exposed_Suprapubic	ARHGEF19	ENSG00000142632.12	137	159	0.237313	2.11926e-05
1_16518866_T_G_b37	rs6697459	Muscle_Skeletal	ARHGEF19	ENSG00000142632.12	206	237	0.241344	2.95611e-12
1_16518866_T_G_b37	rs6697459	Lung	ARHGEF19	ENSG00000142632.12	161	185	0.241514	3.10139e-07
1_16518866_T_G_b37	rs6697459	Breast_Mammary_Tissue	ARHGEF19	ENSG00000142632.12	102	122	0.243028	3.18212e-07
1_16518866_T_G_b37	rs6697459	Colon_Transverse	ARHGEF19	ENSG00000142632.12	103	115	0.23374	6.68383e-06
1_16518866_T_G_b37	rs6697459	Adipose_Visceral_Omentum	ARHGEF19	ENSG00000142632.12	135	156	0.249201	3.21341e-11
1_16518866_T_G_b37	rs6697459	Ovary	ARHGEF19	ENSG00000142632.12	53	61	0.25	5.32831e-07
1_16518866_T_G_b37	rs6697459	Adipose_Subcutaneous	ARHGEF19	ENSG00000142632.12	152	172	0.223377	9.26013e-09
1_16518866_T_G_b37	rs6697459	Esophagus_Gastroesophageal_Junction	ARHGEF19	ENSG00000142632.12	86	98	0.230047	1.12293e-05
1_16518866_T_G_b37	rs6697459	Heart_Left_Ventricle	ARHGEF19	ENSG00000142632.12	99	110	0.202206	2.04271e-05
1_16518866_T_G_b37	rs6697459	Esophagus_Muscularis	ARHGEF19	ENSG00000142632.12	141	159	0.237313	1.29791e-08
1_16519443_G_A_b37	rs10907284	Esophagus_Mucosa	ARHGEF19	ENSG00000142632.12	144	163	0.230226	6.13059e-07
1_16519443_G_A_b37	rs10907284	Adipose_Subcutaneous	ARHGEF19	ENSG00000142632.12	143	160	0.212202	2.06537e-09
1_16519443_G_A_b37	rs10907284	Nerve_Tibial	ARHGEF19	ENSG00000142632.12	138	161	0.227401	2.00863e-08
1_16519443_G_A_b37	rs10907284	Lung	ARHGEF19	ENSG00000142632.12	154	176	0.233422	2.25467e-07
1_16519443_G_A_b37	rs10907284	Muscle_Skeletal	ARHGEF19	ENSG00000142632.12	195	223	0.231809	1.07836e-11
1_16519443_G_A_b37	rs10907284	Adrenal_Gland	ARHGEF19	ENSG00000142632.12	73	84	0.244186	1.12601e-05
1_16519443_G_A_b37	rs10907284	Heart_Left_Ventricle	ARHGEF19	ENSG00000142632.12	95	105	0.195167	1.28064e-05
1_16519443_G_A_b37	rs10907284	Adipose_Visceral_Omentum	ARHGEF19	ENSG00000142632.12	127	145	0.237705	2.57618e-10
1_16519443_G_A_b37	rs10907284	Whole_Blood	ARHGEF19	ENSG00000142632.12	143	163	0.225138	2.89342e-05
1_16519443_G_A_b37	rs10907284	Colon_Transverse	ARHGEF19	ENSG00000142632.12	98	109	0.225207	6.17875e-06
1_16519443_G_A_b37	rs10907284	Skin_Not_Sun_Exposed_Suprapubic	ARHGEF19	ENSG00000142632.12	129	148	0.22561	3.43168e-05
1_16519443_G_A_b37	rs10907284	Esophagus_Gastroesophageal_Junction	ARHGEF19	ENSG00000142632.12	80	91	0.21875	5.06307e-06
1_16519443_G_A_b37	rs10907284	Breast_Mammary_Tissue	ARHGEF19	ENSG00000142632.12	94	112	0.229508	1.14474e-07
1_16519443_G_A_b37	rs10907284	Esophagus_Muscularis	ARHGEF19	ENSG00000142632.12	135	152	0.230303	9.19505e-09
1_16519443_G_A_b37	rs10907284	Ovary	ARHGEF19	ENSG00000142632.12	48	55	0.233051	3.70635e-07
1_16519476_G_A_b37	rs79630607	Brain_Caudate_basal_ganglia	ARHGEF19	ENSG00000142632.12	27	29	0.102113	6.75963e-06
1_16519476_G_A_b37	rs79630607	Adipose_Visceral_Omentum	ARHGEF19	ENSG00000142632.12	63	68	0.109677	2.76487e-16
1_16519476_G_A_b37	rs79630607	Cells_Transformed_fibroblasts	ARHGEF19	ENSG00000142632.12	63	68	0.114094	1.06695e-17
1_16519476_G_A_b37	rs79630607	Esophagus_Gastroesophageal_Junction	ARHGEF19	ENSG00000142632.12	40	45	0.106132	2.63913e-12
1_16519476_G_A_b37	rs79630607	Brain_Anterior_cingulate_cortex_BA24	ARHGEF19	ENSG00000142632.12	20	20	0.0934579	1.14093e-05
1_16519476_G_A_b37	rs79630607	Brain_Amygdala	ARHGEF19	ENSG00000142632.12	22	24	0.139535	1.44255e-06
1_16519476_G_A_b37	rs79630607	Muscle_Skeletal	ARHGEF19	ENSG00000142632.12	99	108	0.110429	7.17971e-13
1_16519476_G_A_b37	rs79630607	Nerve_Tibial	ARHGEF19	ENSG00000142632.12	69	76	0.105556	5.68053e-21
1_16519476_G_A_b37	rs79630607	Stomach	ARHGEF19	ENSG00000142632.12	50	53	0.112288	7.34616e-06
1_16519476_G_A_b37	rs79630607	Artery_Tibial	ARHGEF19	ENSG00000142632.12	78	85	0.11039	2.60954e-21
1_16519476_G_A_b37	rs79630607	Lung	ARHGEF19	ENSG00000142632.12	84	93	0.122368	2.40074e-22
1_16519476_G_A_b37	rs79630607	Colon_Sigmoid	ARHGEF19	ENSG00000142632.12	38	43	0.106965	1.76072e-08
1_16519476_G_A_b37	rs79630607	Esophagus_Muscularis	ARHGEF19	ENSG00000142632.12	69	75	0.112275	1.43085e-26
1_16519476_G_A_b37	rs79630607	Brain_Cerebellum	ARHGEF19	ENSG00000142632.12	31	32	0.104575	1.32621e-10
1_16519476_G_A_b37	rs79630607	Colon_Transverse	ARHGEF19	ENSG00000142632.12	51	56	0.114754	6.61823e-15
1_16519476_G_A_b37	rs79630607	Brain_Cortex	ARHGEF19	ENSG00000142632.12	25	27	0.100746	2.57807e-05
1_16519476_G_A_b37	rs79630607	Whole_Blood	ARHGEF19	ENSG00000142632.12	74	81	0.110354	1.23046e-14
1_16519476_G_A_b37	rs79630607	Liver	ARHGEF19	ENSG00000142632.12	35	39	0.127451	2.5536e-08
1_16519476_G_A_b37	rs79630607	Skin_Sun_Exposed_Lower_leg	ARHGEF19	ENSG00000142632.12	82	88	0.106538	1.0506e-05
1_16519476_G_A_b37	rs79630607	Heart_Left_Ventricle	ARHGEF19	ENSG00000142632.12	58	62	0.114815	1.63844e-16
1_16519476_G_A_b37	rs79630607	Breast_Mammary_Tissue	ARHGEF19	ENSG00000142632.12	48	52	0.104418	2.04409e-11
1_16519476_G_A_b37	rs79630607	Testis	ARHGEF19	ENSG00000142632.12	44	49	0.108889	5.26305e-11
1_16519476_G_A_b37	rs79630607	Spleen	ARHGEF19	ENSG00000142632.12	28	30	0.10274	3.75471e-06
1_16519476_G_A_b37	rs79630607	Artery_Aorta	ARHGEF19	ENSG00000142632.12	58	65	0.122642	3.17154e-26
1_16519476_G_A_b37	rs79630607	Heart_Atrial_Appendage	ARHGEF19	ENSG00000142632.12	59	64	0.121212	4.92469e-12
1_16519476_G_A_b37	rs79630607	Brain_Cerebellar_Hemisphere	ARHGEF19	ENSG00000142632.12	28	29	0.116935	1.24414e-07
1_16519476_G_A_b37	rs79630607	Artery_Coronary	ARHGEF19	ENSG00000142632.12	30	32	0.10596	1.41149e-09
1_16519476_G_A_b37	rs79630607	Adipose_Subcutaneous	ARHGEF19	ENSG00000142632.12	78	86	0.111979	8.74138e-16
1_16520378_C_T_b37	rs72889796	Thyroid	ARHGEF19	ENSG00000142632.12	14	16	0.0200501	3.66129e-06
1_16521349_T_C_b37	rs6603889	Small_Intestine_Terminal_Ileum	ARHGEF19	ENSG00000142632.12	55	62	0.258333	4.41807e-06
1_16521349_T_C_b37	rs6603889	Nerve_Tibial	ARHGEF19	ENSG00000142632.12	141	166	0.233146	1.21137e-08
1_16521349_T_C_b37	rs6603889	Esophagus_Mucosa	ARHGEF19	ENSG00000142632.12	143	164	0.232295	1.92974e-06
1_16521349_T_C_b37	rs6603889	Colon_Transverse	ARHGEF19	ENSG00000142632.12	100	113	0.23251	7.09437e-06
1_16521349_T_C_b37	rs6603889	Adipose_Visceral_Omentum	ARHGEF19	ENSG00000142632.12	130	151	0.24513	1.89575e-11
1_16521349_T_C_b37	rs6603889	Muscle_Skeletal	ARHGEF19	ENSG00000142632.12	200	231	0.237654	3.18872e-12
1_16521349_T_C_b37	rs6603889	Adipose_Subcutaneous	ARHGEF19	ENSG00000142632.12	148	168	0.220472	1.15121e-08
1_16521349_T_C_b37	rs6603889	Breast_Mammary_Tissue	ARHGEF19	ENSG00000142632.12	101	121	0.242972	1.71284e-07
1_16521349_T_C_b37	rs6603889	Heart_Left_Ventricle	ARHGEF19	ENSG00000142632.12	100	111	0.204044	8.35372e-06
1_16521349_T_C_b37	rs6603889	Lung	ARHGEF19	ENSG00000142632.12	156	180	0.237467	2.31868e-07
1_16521349_T_C_b37	rs6603889	Whole_Blood	ARHGEF19	ENSG00000142632.12	148	170	0.231608	1.27363e-05
1_16521349_T_C_b37	rs6603889	Esophagus_Muscularis	ARHGEF19	ENSG00000142632.12	137	156	0.23565	3.36976e-09
1_16521349_T_C_b37	rs6603889	Esophagus_Gastroesophageal_Junction	ARHGEF19	ENSG00000142632.12	82	94	0.22381	2.33697e-06
1_16521349_T_C_b37	rs6603889	Ovary	ARHGEF19	ENSG00000142632.12	49	57	0.239496	4.65262e-06
1_16521349_T_C_b37	rs6603889	Pancreas	ARHGEF19	ENSG00000142632.12	100	112	0.255708	1.54567e-05
1_16521438_T_C_b37	rs151327740	Adipose_Visceral_Omentum	ARHGEF19	ENSG00000142632.12	64	71	0.114148	1.4823e-07
1_16521438_T_C_b37	rs151327740	Spleen	ARHGEF19	ENSG00000142632.12	30	34	0.117241	4.22148e-06
1_16521438_T_C_b37	rs151327740	Adipose_Subcutaneous	ARHGEF19	ENSG00000142632.12	80	84	0.109661	4.2651e-06
1_16521438_T_C_b37	rs151327740	Artery_Tibial	ARHGEF19	ENSG00000142632.12	77	82	0.106218	4.02975e-06
1_16521438_T_C_b37	rs151327740	Cells_Transformed_fibroblasts	ARHGEF19	ENSG00000142632.12	60	65	0.108696	1.30916e-08
1_16521438_T_C_b37	rs151327740	Esophagus_Muscularis	ARHGEF19	ENSG00000142632.12	71	78	0.116418	2.03994e-06
1_16521438_T_C_b37	rs151327740	Small_Intestine_Terminal_Ileum	ARHGEF19	ENSG00000142632.12	29	33	0.135246	2.72432e-06
1_16521438_T_C_b37	rs151327740	Nerve_Tibial	ARHGEF19	ENSG00000142632.12	77	82	0.113573	1.36314e-05
1_16521438_T_C_b37	rs151327740	Esophagus_Gastroesophageal_Junction	ARHGEF19	ENSG00000142632.12	44	50	0.117925	3.677e-06
1_16521556_G_A_b37	rs6672958	Esophagus_Muscularis	ARHGEF19	ENSG00000142632.12	140	157	0.236446	2.65854e-08
1_16521556_G_A_b37	rs6672958	Esophagus_Mucosa	ARHGEF19	ENSG00000142632.12	145	164	0.231638	4.84499e-06
1_16521556_G_A_b37	rs6672958	Adipose_Visceral_Omentum	ARHGEF19	ENSG00000142632.12	133	153	0.246774	6.88381e-12
1_16521556_G_A_b37	rs6672958	Small_Intestine_Terminal_Ileum	ARHGEF19	ENSG00000142632.12	58	65	0.266393	7.96813e-06
1_16521556_G_A_b37	rs6672958	Adipose_Subcutaneous	ARHGEF19	ENSG00000142632.12	152	172	0.225131	6.80157e-09
1_16521556_G_A_b37	rs6672958	Skin_Not_Sun_Exposed_Suprapubic	ARHGEF19	ENSG00000142632.12	140	162	0.243243	3.56777e-05
1_16521556_G_A_b37	rs6672958	Breast_Mammary_Tissue	ARHGEF19	ENSG00000142632.12	103	123	0.247984	2.82595e-07
1_16521556_G_A_b37	rs6672958	Nerve_Tibial	ARHGEF19	ENSG00000142632.12	145	169	0.236695	3.69807e-09
1_16521556_G_A_b37	rs6672958	Ovary	ARHGEF19	ENSG00000142632.12	51	59	0.245833	1.53622e-06
1_16521556_G_A_b37	rs6672958	Muscle_Skeletal	ARHGEF19	ENSG00000142632.12	204	235	0.241273	7.00359e-12
1_16521556_G_A_b37	rs6672958	Adrenal_Gland	ARHGEF19	ENSG00000142632.12	78	90	0.257143	8.59786e-06
1_16521556_G_A_b37	rs6672958	Esophagus_Gastroesophageal_Junction	ARHGEF19	ENSG00000142632.12	85	96	0.227488	7.26711e-06
1_16521556_G_A_b37	rs6672958	Colon_Transverse	ARHGEF19	ENSG00000142632.12	102	113	0.23251	8.26866e-06
1_16521556_G_A_b37	rs6672958	Pancreas	ARHGEF19	ENSG00000142632.12	100	111	0.254587	1.55388e-05
1_16521556_G_A_b37	rs6672958	Lung	ARHGEF19	ENSG00000142632.12	162	186	0.243455	1.75381e-07
1_16521575_T_C_b37	rs6603890	Muscle_Skeletal	ARHGEF19	ENSG00000142632.12	196	226	0.235417	1.99274e-12
1_16521575_T_C_b37	rs6603890	Colon_Transverse	ARHGEF19	ENSG00000142632.12	96	106	0.222689	1.31475e-05
1_16521575_T_C_b37	rs6603890	Pancreas	ARHGEF19	ENSG00000142632.12	96	106	0.246512	2.02891e-05
1_16521575_T_C_b37	rs6603890	Skin_Not_Sun_Exposed_Suprapubic	ARHGEF19	ENSG00000142632.12	133	154	0.234756	2.95245e-05
1_16521575_T_C_b37	rs6603890	Esophagus_Muscularis	ARHGEF19	ENSG00000142632.12	133	149	0.227829	1.93741e-08
1_16521575_T_C_b37	rs6603890	Nerve_Tibial	ARHGEF19	ENSG00000142632.12	140	163	0.230878	1.61389e-09
1_16521575_T_C_b37	rs6603890	Small_Intestine_Terminal_Ileum	ARHGEF19	ENSG00000142632.12	56	62	0.256198	2.95802e-06
1_16521575_T_C_b37	rs6603890	Lung	ARHGEF19	ENSG00000142632.12	153	176	0.234667	4.53494e-07
1_16521575_T_C_b37	rs6603890	Esophagus_Mucosa	ARHGEF19	ENSG00000142632.12	140	158	0.225714	3.92479e-05
1_16521575_T_C_b37	rs6603890	Breast_Mammary_Tissue	ARHGEF19	ENSG00000142632.12	97	116	0.237705	4.53919e-07
1_16521575_T_C_b37	rs6603890	Esophagus_Gastroesophageal_Junction	ARHGEF19	ENSG00000142632.12	79	89	0.214976	8.25262e-06
1_16521575_T_C_b37	rs6603890	Ovary	ARHGEF19	ENSG00000142632.12	47	55	0.235043	6.82103e-06
1_16521575_T_C_b37	rs6603890	Adipose_Visceral_Omentum	ARHGEF19	ENSG00000142632.12	128	147	0.240984	6.79222e-12
1_16521575_T_C_b37	rs6603890	Whole_Blood	ARHGEF19	ENSG00000142632.12	141	162	0.225	3.35874e-05
1_16521575_T_C_b37	rs6603890	Adipose_Subcutaneous	ARHGEF19	ENSG00000142632.12	146	165	0.218833	8.66135e-09
1_16521941_G_A_b37	rs10796438	Lung	ARHGEF19	ENSG00000142632.12	161	185	0.241514	1.78444e-07
1_16521941_G_A_b37	rs10796438	Colon_Transverse	ARHGEF19	ENSG00000142632.12	104	117	0.237805	3.56941e-06
1_16521941_G_A_b37	rs10796438	Esophagus_Mucosa	ARHGEF19	ENSG00000142632.12	148	169	0.236034	1.58188e-06
1_16521941_G_A_b37	rs10796438	Adipose_Visceral_Omentum	ARHGEF19	ENSG00000142632.12	135	156	0.249201	1.53936e-11
1_16521941_G_A_b37	rs10796438	Skin_Not_Sun_Exposed_Suprapubic	ARHGEF19	ENSG00000142632.12	139	161	0.240299	1.92859e-05
1_16521941_G_A_b37	rs10796438	Muscle_Skeletal	ARHGEF19	ENSG00000142632.12	206	238	0.242363	4.01752e-12
1_16521941_G_A_b37	rs10796438	Whole_Blood	ARHGEF19	ENSG00000142632.12	150	173	0.234417	1.80416e-05
1_16521941_G_A_b37	rs10796438	Breast_Mammary_Tissue	ARHGEF19	ENSG00000142632.12	103	123	0.24502	1.58889e-07
1_16521941_G_A_b37	rs10796438	Heart_Left_Ventricle	ARHGEF19	ENSG00000142632.12	100	112	0.205882	7.94453e-06
1_16521941_G_A_b37	rs10796438	Nerve_Tibial	ARHGEF19	ENSG00000142632.12	147	173	0.239612	5.72786e-09
1_16521941_G_A_b37	rs10796438	Esophagus_Muscularis	ARHGEF19	ENSG00000142632.12	141	160	0.238806	4.05265e-09
1_16521941_G_A_b37	rs10796438	Esophagus_Gastroesophageal_Junction	ARHGEF19	ENSG00000142632.12	85	97	0.2277	2.80282e-06
1_16521941_G_A_b37	rs10796438	Ovary	ARHGEF19	ENSG00000142632.12	52	60	0.245902	1.41306e-06
1_16521941_G_A_b37	rs10796438	Small_Intestine_Terminal_Ileum	ARHGEF19	ENSG00000142632.12	57	64	0.262295	4.5012e-06
1_16521941_G_A_b37	rs10796438	Adipose_Subcutaneous	ARHGEF19	ENSG00000142632.12	153	174	0.225974	3.52037e-09
1_16521998_G_A_b37	rs6603891	Esophagus_Mucosa	ARHGEF19	ENSG00000142632.12	148	169	0.236034	1.58188e-06
1_16521998_G_A_b37	rs6603891	Colon_Transverse	ARHGEF19	ENSG00000142632.12	104	117	0.237805	3.56941e-06
1_16521998_G_A_b37	rs6603891	Lung	ARHGEF19	ENSG00000142632.12	161	185	0.241514	1.78444e-07
1_16521998_G_A_b37	rs6603891	Esophagus_Gastroesophageal_Junction	ARHGEF19	ENSG00000142632.12	85	97	0.2277	2.80282e-06
1_16521998_G_A_b37	rs6603891	Nerve_Tibial	ARHGEF19	ENSG00000142632.12	147	173	0.239612	5.72786e-09
1_16521998_G_A_b37	rs6603891	Adipose_Visceral_Omentum	ARHGEF19	ENSG00000142632.12	135	156	0.249201	1.53936e-11
1_16521998_G_A_b37	rs6603891	Ovary	ARHGEF19	ENSG00000142632.12	52	60	0.245902	1.41306e-06
1_16521998_G_A_b37	rs6603891	Esophagus_Muscularis	ARHGEF19	ENSG00000142632.12	141	160	0.238806	4.05265e-09
1_16521998_G_A_b37	rs6603891	Skin_Not_Sun_Exposed_Suprapubic	ARHGEF19	ENSG00000142632.12	139	161	0.240299	1.92859e-05
1_16521998_G_A_b37	rs6603891	Heart_Left_Ventricle	ARHGEF19	ENSG00000142632.12	100	112	0.205882	7.94453e-06
1_16521998_G_A_b37	rs6603891	Adipose_Subcutaneous	ARHGEF19	ENSG00000142632.12	153	174	0.225974	3.52037e-09
1_16521998_G_A_b37	rs6603891	Whole_Blood	ARHGEF19	ENSG00000142632.12	150	173	0.234417	1.80416e-05
1_16521998_G_A_b37	rs6603891	Muscle_Skeletal	ARHGEF19	ENSG00000142632.12	206	238	0.242363	4.01752e-12
1_16521998_G_A_b37	rs6603891	Breast_Mammary_Tissue	ARHGEF19	ENSG00000142632.12	103	123	0.24502	1.58889e-07
1_16521998_G_A_b37	rs6603891	Small_Intestine_Terminal_Ileum	ARHGEF19	ENSG00000142632.12	57	64	0.262295	4.5012e-06
1_16522269_T_C_b37	rs1985166	Esophagus_Muscularis	ARHGEF19	ENSG00000142632.12	142	161	0.240299	8.85864e-09
1_16522269_T_C_b37	rs1985166	Adipose_Visceral_Omentum	ARHGEF19	ENSG00000142632.12	135	156	0.249201	1.53936e-11
1_16522269_T_C_b37	rs1985166	Esophagus_Mucosa	ARHGEF19	ENSG00000142632.12	149	170	0.23743	9.00103e-07
1_16522269_T_C_b37	rs1985166	Breast_Mammary_Tissue	ARHGEF19	ENSG00000142632.12	104	124	0.247012	4.04785e-07
1_16522269_T_C_b37	rs1985166	Muscle_Skeletal	ARHGEF19	ENSG00000142632.12	207	239	0.243381	1.01242e-11
1_16522269_T_C_b37	rs1985166	Nerve_Tibial	ARHGEF19	ENSG00000142632.12	148	174	0.240997	9.94499e-09
1_16522269_T_C_b37	rs1985166	Skin_Not_Sun_Exposed_Suprapubic	ARHGEF19	ENSG00000142632.12	140	162	0.241791	1.68536e-05
1_16522269_T_C_b37	rs1985166	Whole_Blood	ARHGEF19	ENSG00000142632.12	151	174	0.235772	2.40453e-05
1_16522269_T_C_b37	rs1985166	Small_Intestine_Terminal_Ileum	ARHGEF19	ENSG00000142632.12	58	65	0.266393	7.96813e-06
1_16522269_T_C_b37	rs1985166	Lung	ARHGEF19	ENSG00000142632.12	162	186	0.24282	2.26144e-07
1_16522269_T_C_b37	rs1985166	Colon_Transverse	ARHGEF19	ENSG00000142632.12	105	118	0.239837	4.83333e-06
1_16522269_T_C_b37	rs1985166	Esophagus_Gastroesophageal_Junction	ARHGEF19	ENSG00000142632.12	86	98	0.230047	6.73155e-06
1_16522269_T_C_b37	rs1985166	Adipose_Subcutaneous	ARHGEF19	ENSG00000142632.12	154	175	0.227273	5.24311e-09
1_16522269_T_C_b37	rs1985166	Adrenal_Gland	ARHGEF19	ENSG00000142632.12	78	91	0.26	6.313e-06
1_16522269_T_C_b37	rs1985166	Ovary	ARHGEF19	ENSG00000142632.12	53	61	0.25	1.10546e-06
1_16522269_T_C_b37	rs1985166	Heart_Left_Ventricle	ARHGEF19	ENSG00000142632.12	101	113	0.207721	1.17209e-05
1_16522380_C_T_b37	rs61771408	Esophagus_Muscularis	ARHGEF19	ENSG00000142632.12	67	73	0.10961	7.1321e-26
1_16522380_C_T_b37	rs61771408	Brain_Cerebellar_Hemisphere	ARHGEF19	ENSG00000142632.12	29	30	0.120968	4.28851e-07
1_16522380_C_T_b37	rs61771408	Liver	ARHGEF19	ENSG00000142632.12	35	39	0.127451	2.5536e-08
1_16522380_C_T_b37	rs61771408	Nerve_Tibial	ARHGEF19	ENSG00000142632.12	68	75	0.104167	7.84117e-20
1_16522380_C_T_b37	rs61771408	Colon_Transverse	ARHGEF19	ENSG00000142632.12	50	55	0.112245	4.27853e-14
1_16522380_C_T_b37	rs61771408	Esophagus_Gastroesophageal_Junction	ARHGEF19	ENSG00000142632.12	40	45	0.105634	1.63952e-12
1_16522380_C_T_b37	rs61771408	Lung	ARHGEF19	ENSG00000142632.12	86	95	0.124672	3.0134e-21
1_16522380_C_T_b37	rs61771408	Brain_Anterior_cingulate_cortex_BA24	ARHGEF19	ENSG00000142632.12	22	22	0.100917	9.77306e-06
1_16522380_C_T_b37	rs61771408	Muscle_Skeletal	ARHGEF19	ENSG00000142632.12	98	107	0.109184	4.81937e-12
1_16522380_C_T_b37	rs61771408	Testis	ARHGEF19	ENSG00000142632.12	41	46	0.102679	1.49433e-10
1_16522380_C_T_b37	rs61771408	Heart_Atrial_Appendage	ARHGEF19	ENSG00000142632.12	59	64	0.121212	4.92469e-12
1_16522380_C_T_b37	rs61771408	Skin_Sun_Exposed_Lower_leg	ARHGEF19	ENSG00000142632.12	81	87	0.105072	3.12242e-06
1_16522380_C_T_b37	rs61771408	Brain_Cortex	ARHGEF19	ENSG00000142632.12	27	29	0.107407	1.90436e-05
1_16522380_C_T_b37	rs61771408	Brain_Caudate_basal_ganglia	ARHGEF19	ENSG00000142632.12	29	31	0.108392	4.57746e-06
1_16522380_C_T_b37	rs61771408	Artery_Tibial	ARHGEF19	ENSG00000142632.12	79	86	0.111111	1.04694e-20
1_16522380_C_T_b37	rs61771408	Heart_Left_Ventricle	ARHGEF19	ENSG00000142632.12	60	64	0.117647	2.16356e-16
1_16522380_C_T_b37	rs61771408	Artery_Aorta	ARHGEF19	ENSG00000142632.12	59	66	0.123596	1.79565e-27
1_16522380_C_T_b37	rs61771408	Spleen	ARHGEF19	ENSG00000142632.12	26	28	0.0965517	1.28309e-06
1_16522380_C_T_b37	rs61771408	Artery_Coronary	ARHGEF19	ENSG00000142632.12	31	33	0.108553	1.35182e-09
1_16522380_C_T_b37	rs61771408	Brain_Cerebellum	ARHGEF19	ENSG00000142632.12	32	33	0.107843	1.20814e-10
1_16522380_C_T_b37	rs61771408	Cells_Transformed_fibroblasts	ARHGEF19	ENSG00000142632.12	64	69	0.115385	8.74428e-17
1_16522380_C_T_b37	rs61771408	Adipose_Visceral_Omentum	ARHGEF19	ENSG00000142632.12	65	70	0.112179	1.84622e-15
1_16522380_C_T_b37	rs61771408	Adipose_Subcutaneous	ARHGEF19	ENSG00000142632.12	78	86	0.111979	1.67528e-15
1_16522380_C_T_b37	rs61771408	Whole_Blood	ARHGEF19	ENSG00000142632.12	74	81	0.109756	1.65896e-14
1_16522380_C_T_b37	rs61771408	Colon_Sigmoid	ARHGEF19	ENSG00000142632.12	39	44	0.108911	7.62548e-10
1_16522380_C_T_b37	rs61771408	Breast_Mammary_Tissue	ARHGEF19	ENSG00000142632.12	50	54	0.10757	1.45969e-11
1_16522380_C_T_b37	rs61771408	Brain_Amygdala	ARHGEF19	ENSG00000142632.12	24	26	0.147727	2.30567e-06
1_16522456_A_G_b37	rs221026	Heart_Left_Ventricle	ARHGEF19	ENSG00000142632.12	101	113	0.207721	1.17209e-05
1_16522456_A_G_b37	rs221026	Lung	ARHGEF19	ENSG00000142632.12	161	184	0.240838	4.06714e-07
1_16522456_A_G_b37	rs221026	Esophagus_Gastroesophageal_Junction	ARHGEF19	ENSG00000142632.12	86	98	0.230047	6.73155e-06
1_16522456_A_G_b37	rs221026	Muscle_Skeletal	ARHGEF19	ENSG00000142632.12	206	237	0.241837	1.79075e-11
1_16522456_A_G_b37	rs221026	Adipose_Visceral_Omentum	ARHGEF19	ENSG00000142632.12	134	154	0.246795	5.27024e-11
1_16522456_A_G_b37	rs221026	Colon_Transverse	ARHGEF19	ENSG00000142632.12	105	118	0.239837	4.83333e-06
1_16522456_A_G_b37	rs221026	Adrenal_Gland	ARHGEF19	ENSG00000142632.12	77	89	0.255747	7.3605e-06
1_16522456_A_G_b37	rs221026	Nerve_Tibial	ARHGEF19	ENSG00000142632.12	147	172	0.238889	9.00382e-09
1_16522456_A_G_b37	rs221026	Esophagus_Mucosa	ARHGEF19	ENSG00000142632.12	148	168	0.235294	1.00976e-06
1_16522456_A_G_b37	rs221026	Small_Intestine_Terminal_Ileum	ARHGEF19	ENSG00000142632.12	57	63	0.260331	8.33423e-06
1_16522456_A_G_b37	rs221026	Esophagus_Muscularis	ARHGEF19	ENSG00000142632.12	141	159	0.238024	1.24522e-08
1_16522456_A_G_b37	rs221026	Ovary	ARHGEF19	ENSG00000142632.12	53	61	0.25	1.10546e-06
1_16522456_A_G_b37	rs221026	Whole_Blood	ARHGEF19	ENSG00000142632.12	151	174	0.235772	2.40453e-05
1_16522456_A_G_b37	rs221026	Adipose_Subcutaneous	ARHGEF19	ENSG00000142632.12	154	175	0.227273	5.24311e-09
1_16522456_A_G_b37	rs221026	Breast_Mammary_Tissue	ARHGEF19	ENSG00000142632.12	103	122	0.244	7.66807e-07
1_16522456_A_G_b37	rs221026	Skin_Not_Sun_Exposed_Suprapubic	ARHGEF19	ENSG00000142632.12	139	160	0.239521	1.8334e-05
1_16522469_A_G_b37	rs221027	Esophagus_Gastroesophageal_Junction	ARHGEF19	ENSG00000142632.12	86	98	0.230047	6.73155e-06
1_16522469_A_G_b37	rs221027	Nerve_Tibial	ARHGEF19	ENSG00000142632.12	148	174	0.240997	9.94499e-09
1_16522469_A_G_b37	rs221027	Heart_Left_Ventricle	ARHGEF19	ENSG00000142632.12	101	113	0.207721	1.17209e-05
1_16522469_A_G_b37	rs221027	Adipose_Visceral_Omentum	ARHGEF19	ENSG00000142632.12	135	156	0.249201	1.53936e-11
1_16522469_A_G_b37	rs221027	Small_Intestine_Terminal_Ileum	ARHGEF19	ENSG00000142632.12	58	65	0.266393	7.96813e-06
1_16522469_A_G_b37	rs221027	Whole_Blood	ARHGEF19	ENSG00000142632.12	151	174	0.235772	2.40453e-05
1_16522469_A_G_b37	rs221027	Colon_Transverse	ARHGEF19	ENSG00000142632.12	105	118	0.239837	4.83333e-06
1_16522469_A_G_b37	rs221027	Skin_Not_Sun_Exposed_Suprapubic	ARHGEF19	ENSG00000142632.12	140	162	0.241791	1.68536e-05
1_16522469_A_G_b37	rs221027	Adrenal_Gland	ARHGEF19	ENSG00000142632.12	78	91	0.26	6.313e-06
1_16522469_A_G_b37	rs221027	Esophagus_Mucosa	ARHGEF19	ENSG00000142632.12	149	170	0.23743	9.00103e-07
1_16522469_A_G_b37	rs221027	Adipose_Subcutaneous	ARHGEF19	ENSG00000142632.12	154	175	0.227273	5.24311e-09
1_16522469_A_G_b37	rs221027	Breast_Mammary_Tissue	ARHGEF19	ENSG00000142632.12	104	124	0.247012	4.04785e-07
1_16522469_A_G_b37	rs221027	Muscle_Skeletal	ARHGEF19	ENSG00000142632.12	207	239	0.243381	1.01242e-11
1_16522469_A_G_b37	rs221027	Esophagus_Muscularis	ARHGEF19	ENSG00000142632.12	142	161	0.240299	8.85864e-09
1_16522469_A_G_b37	rs221027	Ovary	ARHGEF19	ENSG00000142632.12	53	61	0.25	1.10546e-06
1_16522469_A_G_b37	rs221027	Lung	ARHGEF19	ENSG00000142632.12	162	186	0.24282	2.26144e-07
1_16522975_T_C_b37	rs24263	Esophagus_Gastroesophageal_Junction	ARHGEF19	ENSG00000142632.12	86	98	0.230047	6.73155e-06
1_16522975_T_C_b37	rs24263	Whole_Blood	ARHGEF19	ENSG00000142632.12	151	174	0.235772	2.40453e-05
1_16522975_T_C_b37	rs24263	Heart_Left_Ventricle	ARHGEF19	ENSG00000142632.12	101	113	0.207721	1.17209e-05
1_16522975_T_C_b37	rs24263	Skin_Not_Sun_Exposed_Suprapubic	ARHGEF19	ENSG00000142632.12	140	162	0.241791	1.68536e-05
1_16522975_T_C_b37	rs24263	Adipose_Visceral_Omentum	ARHGEF19	ENSG00000142632.12	135	156	0.249201	1.53936e-11
1_16522975_T_C_b37	rs24263	Esophagus_Mucosa	ARHGEF19	ENSG00000142632.12	149	170	0.23743	9.00103e-07
1_16522975_T_C_b37	rs24263	Small_Intestine_Terminal_Ileum	ARHGEF19	ENSG00000142632.12	58	65	0.266393	7.96813e-06
1_16522975_T_C_b37	rs24263	Lung	ARHGEF19	ENSG00000142632.12	162	186	0.24282	2.26144e-07
1_16522975_T_C_b37	rs24263	Nerve_Tibial	ARHGEF19	ENSG00000142632.12	148	174	0.240997	9.94499e-09
1_16522975_T_C_b37	rs24263	Adipose_Subcutaneous	ARHGEF19	ENSG00000142632.12	154	175	0.227273	5.24311e-09
1_16522975_T_C_b37	rs24263	Adrenal_Gland	ARHGEF19	ENSG00000142632.12	78	91	0.26	6.313e-06
1_16522975_T_C_b37	rs24263	Breast_Mammary_Tissue	ARHGEF19	ENSG00000142632.12	104	124	0.247012	4.04785e-07
1_16522975_T_C_b37	rs24263	Ovary	ARHGEF19	ENSG00000142632.12	53	61	0.25	1.10546e-06
1_16522975_T_C_b37	rs24263	Colon_Transverse	ARHGEF19	ENSG00000142632.12	105	118	0.239837	4.83333e-06
1_16522975_T_C_b37	rs24263	Muscle_Skeletal	ARHGEF19	ENSG00000142632.12	207	239	0.243381	1.01242e-11
1_16522975_T_C_b37	rs24263	Esophagus_Muscularis	ARHGEF19	ENSG00000142632.12	142	161	0.240299	8.85864e-09
1_16523672_G_C_b37	rs10907286	Heart_Left_Ventricle	ARHGEF19	ENSG00000142632.12	184	260	0.477941	1.49367e-08
1_16523672_G_C_b37	rs10907286	Cells_Transformed_fibroblasts	ARHGEF19	ENSG00000142632.12	200	260	0.433333	1.23169e-24
1_16523672_G_C_b37	rs10907286	Adipose_Visceral_Omentum	ARHGEF19	ENSG00000142632.12	206	277	0.442492	4.68802e-08
1_16523672_G_C_b37	rs10907286	Liver	ARHGEF19	ENSG00000142632.12	98	135	0.441176	2.75949e-09
1_16523672_G_C_b37	rs10907286	Testis	ARHGEF19	ENSG00000142632.12	144	196	0.435556	1.65758e-10
1_16523672_G_C_b37	rs10907286	Spleen	ARHGEF19	ENSG00000142632.12	87	119	0.407534	5.21745e-07
1_16523672_G_C_b37	rs10907286	Artery_Tibial	ARHGEF19	ENSG00000142632.12	257	349	0.449742	1.69233e-30
1_16523672_G_C_b37	rs10907286	Whole_Blood	ARHGEF19	ENSG00000142632.12	245	327	0.443089	1.89144e-08
1_16523672_G_C_b37	rs10907286	Lung	ARHGEF19	ENSG00000142632.12	256	349	0.455614	7.00562e-10
1_16523672_G_C_b37	rs10907286	Small_Intestine_Terminal_Ileum	ARHGEF19	ENSG00000142632.12	73	93	0.381148	1.04916e-05
1_16523672_G_C_b37	rs10907286	Esophagus_Gastroesophageal_Junction	ARHGEF19	ENSG00000142632.12	144	194	0.455399	3.20647e-08
1_16523672_G_C_b37	rs10907286	Thyroid	ARHGEF19	ENSG00000142632.12	261	358	0.448622	4.46447e-07
1_16523672_G_C_b37	rs10907286	Colon_Transverse	ARHGEF19	ENSG00000142632.12	157	210	0.426829	4.51935e-10
1_16523672_G_C_b37	rs10907286	Cells_EBV-transformed_lymphocytes	ARHGEF19	ENSG00000142632.12	76	93	0.397436	2.84951e-08
1_16523672_G_C_b37	rs10907286	Heart_Atrial_Appendage	ARHGEF19	ENSG00000142632.12	183	247	0.467803	4.71076e-09
1_16523672_G_C_b37	rs10907286	Nerve_Tibial	ARHGEF19	ENSG00000142632.12	240	326	0.451524	3.61187e-09
1_16523672_G_C_b37	rs10907286	Colon_Sigmoid	ARHGEF19	ENSG00000142632.12	138	183	0.450739	5.37854e-09
1_16523672_G_C_b37	rs10907286	Muscle_Skeletal	ARHGEF19	ENSG00000142632.12	322	427	0.434827	4.38233e-06
1_16523672_G_C_b37	rs10907286	Brain_Cerebellum	ARHGEF19	ENSG00000142632.12	106	143	0.464286	2.22029e-05
1_16523672_G_C_b37	rs10907286	Artery_Aorta	ARHGEF19	ENSG00000142632.12	176	238	0.445693	2.21338e-25
1_16523672_G_C_b37	rs10907286	Artery_Coronary	ARHGEF19	ENSG00000142632.12	97	140	0.460526	7.76304e-09
1_16523672_G_C_b37	rs10907286	Adipose_Subcutaneous	ARHGEF19	ENSG00000142632.12	257	345	0.448052	6.5679e-14
1_16523672_G_C_b37	rs10907286	Esophagus_Muscularis	ARHGEF19	ENSG00000142632.12	219	294	0.438806	1.13878e-15
1_16523709_GC_G_b37	rs796273597	Whole_Blood	ARHGEF19	ENSG00000142632.12	150	173	0.234417	1.80416e-05
1_16523709_GC_G_b37	rs796273597	Breast_Mammary_Tissue	ARHGEF19	ENSG00000142632.12	103	123	0.24502	1.58889e-07
1_16523709_GC_G_b37	rs796273597	Small_Intestine_Terminal_Ileum	ARHGEF19	ENSG00000142632.12	57	64	0.262295	4.5012e-06
1_16523709_GC_G_b37	rs796273597	Esophagus_Gastroesophageal_Junction	ARHGEF19	ENSG00000142632.12	85	97	0.2277	2.80282e-06
1_16523709_GC_G_b37	rs796273597	Skin_Not_Sun_Exposed_Suprapubic	ARHGEF19	ENSG00000142632.12	139	161	0.240299	1.92859e-05
1_16523709_GC_G_b37	rs796273597	Esophagus_Muscularis	ARHGEF19	ENSG00000142632.12	141	160	0.238806	4.05265e-09
1_16523709_GC_G_b37	rs796273597	Adipose_Visceral_Omentum	ARHGEF19	ENSG00000142632.12	135	156	0.249201	1.53936e-11
1_16523709_GC_G_b37	rs796273597	Nerve_Tibial	ARHGEF19	ENSG00000142632.12	147	173	0.239612	5.72786e-09
1_16523709_GC_G_b37	rs796273597	Heart_Left_Ventricle	ARHGEF19	ENSG00000142632.12	100	112	0.205882	7.94453e-06
1_16523709_GC_G_b37	rs796273597	Esophagus_Mucosa	ARHGEF19	ENSG00000142632.12	148	169	0.236034	1.58188e-06
1_16523709_GC_G_b37	rs796273597	Lung	ARHGEF19	ENSG00000142632.12	161	185	0.241514	1.78444e-07
1_16523709_GC_G_b37	rs796273597	Ovary	ARHGEF19	ENSG00000142632.12	52	60	0.245902	1.41306e-06
1_16523709_GC_G_b37	rs796273597	Colon_Transverse	ARHGEF19	ENSG00000142632.12	104	117	0.237805	3.56941e-06
1_16523709_GC_G_b37	rs796273597	Adipose_Subcutaneous	ARHGEF19	ENSG00000142632.12	153	174	0.225974	3.52037e-09
1_16523709_GC_G_b37	rs796273597	Muscle_Skeletal	ARHGEF19	ENSG00000142632.12	206	238	0.242363	4.01752e-12
1_16523713_A_G_b37	rs11803768	Whole_Blood	ARHGEF19	ENSG00000142632.12	167	197	0.266938	6.64118e-07
1_16523713_A_G_b37	rs11803768	Nerve_Tibial	ARHGEF19	ENSG00000142632.12	161	196	0.271468	2.59245e-10
1_16523713_A_G_b37	rs11803768	Ovary	ARHGEF19	ENSG00000142632.12	59	72	0.295082	1.07809e-05
1_16523713_A_G_b37	rs11803768	Colon_Transverse	ARHGEF19	ENSG00000142632.12	115	133	0.270325	2.24164e-07
1_16523713_A_G_b37	rs11803768	Adrenal_Gland	ARHGEF19	ENSG00000142632.12	86	102	0.291429	1.75677e-05
1_16523713_A_G_b37	rs11803768	Adipose_Subcutaneous	ARHGEF19	ENSG00000142632.12	173	205	0.266234	3.87216e-10
1_16523713_A_G_b37	rs11803768	Heart_Left_Ventricle	ARHGEF19	ENSG00000142632.12	112	130	0.238971	2.01007e-07
1_16523713_A_G_b37	rs11803768	Small_Intestine_Terminal_Ileum	ARHGEF19	ENSG00000142632.12	66	76	0.311475	1.54658e-06
1_16523713_A_G_b37	rs11803768	Breast_Mammary_Tissue	ARHGEF19	ENSG00000142632.12	113	138	0.2749	1.21027e-06
1_16523713_A_G_b37	rs11803768	Esophagus_Gastroesophageal_Junction	ARHGEF19	ENSG00000142632.12	94	107	0.251174	6.34323e-06
1_16523713_A_G_b37	rs11803768	Esophagus_Muscularis	ARHGEF19	ENSG00000142632.12	155	181	0.270149	6.69991e-09
1_16523713_A_G_b37	rs11803768	Muscle_Skeletal	ARHGEF19	ENSG00000142632.12	230	273	0.278004	4.9154e-13
1_16523713_A_G_b37	rs11803768	Adipose_Visceral_Omentum	ARHGEF19	ENSG00000142632.12	144	170	0.271565	8.00638e-11
1_16523713_A_G_b37	rs11803768	Lung	ARHGEF19	ENSG00000142632.12	173	201	0.262402	7.58122e-07
1_16523767_C_G_b37	rs221029	Spleen	ARHGEF19	ENSG00000142632.12	47	57	0.195205	6.75914e-12
1_16523767_C_G_b37	rs221029	Nerve_Tibial	ARHGEF19	ENSG00000142632.12	107	123	0.17036	1.6452e-17
1_16523767_C_G_b37	rs221029	Esophagus_Mucosa	ARHGEF19	ENSG00000142632.12	111	128	0.178771	2.64845e-08
1_16523767_C_G_b37	rs221029	Heart_Atrial_Appendage	ARHGEF19	ENSG00000142632.12	71	84	0.159091	6.61566e-09
1_16523767_C_G_b37	rs221029	Pancreas	ARHGEF19	ENSG00000142632.12	65	77	0.175	1.42407e-05
1_16523767_C_G_b37	rs221029	Artery_Aorta	ARHGEF19	ENSG00000142632.12	74	85	0.159176	2.74896e-13
1_16523767_C_G_b37	rs221029	Small_Intestine_Terminal_Ileum	ARHGEF19	ENSG00000142632.12	43	49	0.20082	1.28302e-14
1_16523767_C_G_b37	rs221029	Skin_Sun_Exposed_Lower_leg	ARHGEF19	ENSG00000142632.12	123	141	0.17029	5.93716e-06
1_16523767_C_G_b37	rs221029	Esophagus_Gastroesophageal_Junction	ARHGEF19	ENSG00000142632.12	70	80	0.187793	2.20881e-12
1_16523767_C_G_b37	rs221029	Colon_Transverse	ARHGEF19	ENSG00000142632.12	81	92	0.186992	2.64005e-15
1_16523767_C_G_b37	rs221029	Adipose_Visceral_Omentum	ARHGEF19	ENSG00000142632.12	94	108	0.172524	1.10709e-17
1_16523767_C_G_b37	rs221029	Brain_Cerebellar_Hemisphere	ARHGEF19	ENSG00000142632.12	38	41	0.164	1.20872e-06
1_16523767_C_G_b37	rs221029	Liver	ARHGEF19	ENSG00000142632.12	46	51	0.166667	3.29312e-08
1_16523767_C_G_b37	rs221029	Lung	ARHGEF19	ENSG00000142632.12	107	120	0.156658	1.54268e-11
1_16523767_C_G_b37	rs221029	Breast_Mammary_Tissue	ARHGEF19	ENSG00000142632.12	74	84	0.167331	1.40912e-07
1_16523767_C_G_b37	rs221029	Cells_Transformed_fibroblasts	ARHGEF19	ENSG00000142632.12	89	103	0.171667	1.39019e-25
1_16523767_C_G_b37	rs221029	Artery_Tibial	ARHGEF19	ENSG00000142632.12	117	135	0.173969	1.11567e-23
1_16523767_C_G_b37	rs221029	Heart_Left_Ventricle	ARHGEF19	ENSG00000142632.12	77	90	0.165441	4.79318e-14
1_16523767_C_G_b37	rs221029	Stomach	ARHGEF19	ENSG00000142632.12	78	87	0.183544	2.04491e-05
1_16523767_C_G_b37	rs221029	Whole_Blood	ARHGEF19	ENSG00000142632.12	113	131	0.177507	4.6365e-12
1_16523767_C_G_b37	rs221029	Adipose_Subcutaneous	ARHGEF19	ENSG00000142632.12	117	133	0.172727	7.79538e-25
1_16523767_C_G_b37	rs221029	Esophagus_Muscularis	ARHGEF19	ENSG00000142632.12	105	120	0.179104	1.2332e-19
1_16523767_C_G_b37	rs221029	Brain_Cerebellum	ARHGEF19	ENSG00000142632.12	46	51	0.165584	9.01793e-08
1_16523767_C_G_b37	rs221029	Artery_Coronary	ARHGEF19	ENSG00000142632.12	42	49	0.161184	9.08513e-06
1_16523767_C_G_b37	rs221029	Brain_Cortex	ARHGEF19	ENSG00000142632.12	38	42	0.154412	1.71878e-06
1_16523767_C_G_b37	rs221029	Muscle_Skeletal	ARHGEF19	ENSG00000142632.12	150	173	0.176171	1.9792e-18
1_16523767_C_G_b37	rs221029	Cells_EBV-transformed_lymphocytes	ARHGEF19	ENSG00000142632.12	45	50	0.213675	4.73726e-11
1_16523767_C_G_b37	rs221029	Colon_Sigmoid	ARHGEF19	ENSG00000142632.12	62	68	0.167488	1.07478e-09
1_16523767_C_G_b37	rs221029	Testis	ARHGEF19	ENSG00000142632.12	65	73	0.162222	1.51973e-10
1_16524653_A_G_b37	rs221030	Whole_Blood	ARHGEF19	ENSG00000142632.12	151	174	0.235772	2.40453e-05
1_16524653_A_G_b37	rs221030	Skin_Not_Sun_Exposed_Suprapubic	ARHGEF19	ENSG00000142632.12	140	162	0.241791	1.68536e-05
1_16524653_A_G_b37	rs221030	Esophagus_Gastroesophageal_Junction	ARHGEF19	ENSG00000142632.12	86	98	0.230047	6.73155e-06
1_16524653_A_G_b37	rs221030	Adipose_Subcutaneous	ARHGEF19	ENSG00000142632.12	154	175	0.227273	5.24311e-09
1_16524653_A_G_b37	rs221030	Nerve_Tibial	ARHGEF19	ENSG00000142632.12	148	174	0.240997	9.94499e-09
1_16524653_A_G_b37	rs221030	Ovary	ARHGEF19	ENSG00000142632.12	53	61	0.25	1.10546e-06
1_16524653_A_G_b37	rs221030	Muscle_Skeletal	ARHGEF19	ENSG00000142632.12	207	239	0.243381	1.01242e-11
1_16524653_A_G_b37	rs221030	Esophagus_Mucosa	ARHGEF19	ENSG00000142632.12	149	170	0.23743	9.00103e-07
1_16524653_A_G_b37	rs221030	Adipose_Visceral_Omentum	ARHGEF19	ENSG00000142632.12	135	156	0.249201	1.53936e-11
1_16524653_A_G_b37	rs221030	Lung	ARHGEF19	ENSG00000142632.12	162	186	0.24282	2.26144e-07
1_16524653_A_G_b37	rs221030	Colon_Transverse	ARHGEF19	ENSG00000142632.12	105	118	0.239837	4.83333e-06
1_16524653_A_G_b37	rs221030	Small_Intestine_Terminal_Ileum	ARHGEF19	ENSG00000142632.12	58	65	0.266393	7.96813e-06
1_16524653_A_G_b37	rs221030	Adrenal_Gland	ARHGEF19	ENSG00000142632.12	78	91	0.26	6.313e-06
1_16524653_A_G_b37	rs221030	Esophagus_Muscularis	ARHGEF19	ENSG00000142632.12	142	161	0.240299	8.85864e-09
1_16524653_A_G_b37	rs221030	Heart_Left_Ventricle	ARHGEF19	ENSG00000142632.12	101	113	0.207721	1.17209e-05
1_16524653_A_G_b37	rs221030	Breast_Mammary_Tissue	ARHGEF19	ENSG00000142632.12	104	124	0.247012	4.04785e-07
1_16524869_T_C_b37	rs221031	Small_Intestine_Terminal_Ileum	ARHGEF19	ENSG00000142632.12	58	65	0.266393	7.96813e-06
1_16524869_T_C_b37	rs221031	Lung	ARHGEF19	ENSG00000142632.12	162	186	0.24282	2.26144e-07
1_16524869_T_C_b37	rs221031	Adipose_Visceral_Omentum	ARHGEF19	ENSG00000142632.12	135	156	0.249201	1.53936e-11
1_16524869_T_C_b37	rs221031	Breast_Mammary_Tissue	ARHGEF19	ENSG00000142632.12	104	124	0.247012	4.04785e-07
1_16524869_T_C_b37	rs221031	Colon_Transverse	ARHGEF19	ENSG00000142632.12	105	118	0.239837	4.83333e-06
1_16524869_T_C_b37	rs221031	Skin_Not_Sun_Exposed_Suprapubic	ARHGEF19	ENSG00000142632.12	140	162	0.241791	1.68536e-05
1_16524869_T_C_b37	rs221031	Nerve_Tibial	ARHGEF19	ENSG00000142632.12	148	174	0.240997	9.94499e-09
1_16524869_T_C_b37	rs221031	Adipose_Subcutaneous	ARHGEF19	ENSG00000142632.12	154	175	0.227273	5.24311e-09
1_16524869_T_C_b37	rs221031	Esophagus_Mucosa	ARHGEF19	ENSG00000142632.12	149	170	0.23743	9.00103e-07
1_16524869_T_C_b37	rs221031	Esophagus_Gastroesophageal_Junction	ARHGEF19	ENSG00000142632.12	86	98	0.230047	6.73155e-06
1_16524869_T_C_b37	rs221031	Whole_Blood	ARHGEF19	ENSG00000142632.12	151	174	0.235772	2.40453e-05
1_16524869_T_C_b37	rs221031	Heart_Left_Ventricle	ARHGEF19	ENSG00000142632.12	101	113	0.207721	1.17209e-05
1_16524869_T_C_b37	rs221031	Esophagus_Muscularis	ARHGEF19	ENSG00000142632.12	142	161	0.240299	8.85864e-09
1_16524869_T_C_b37	rs221031	Adrenal_Gland	ARHGEF19	ENSG00000142632.12	78	91	0.26	6.313e-06
1_16524869_T_C_b37	rs221031	Muscle_Skeletal	ARHGEF19	ENSG00000142632.12	207	239	0.243381	1.01242e-11
1_16524869_T_C_b37	rs221031	Ovary	ARHGEF19	ENSG00000142632.12	53	61	0.25	1.10546e-06
1_16525056_G_T_b37	rs451260	Esophagus_Muscularis	ARHGEF19	ENSG00000142632.12	141	160	0.238806	4.05265e-09
1_16525056_G_T_b37	rs451260	Skin_Not_Sun_Exposed_Suprapubic	ARHGEF19	ENSG00000142632.12	139	160	0.238806	2.18754e-05
1_16525056_G_T_b37	rs451260	Ovary	ARHGEF19	ENSG00000142632.12	52	59	0.241803	3.54924e-07
1_16525056_G_T_b37	rs451260	Adipose_Visceral_Omentum	ARHGEF19	ENSG00000142632.12	134	154	0.246006	2.09879e-11
1_16525056_G_T_b37	rs451260	Small_Intestine_Terminal_Ileum	ARHGEF19	ENSG00000142632.12	57	64	0.262295	4.5012e-06
1_16525056_G_T_b37	rs451260	Adrenal_Gland	ARHGEF19	ENSG00000142632.12	77	89	0.254286	2.45059e-05
1_16525056_G_T_b37	rs451260	Esophagus_Gastroesophageal_Junction	ARHGEF19	ENSG00000142632.12	85	97	0.2277	2.80282e-06
1_16525056_G_T_b37	rs451260	Whole_Blood	ARHGEF19	ENSG00000142632.12	149	172	0.233062	1.77816e-05
1_16525056_G_T_b37	rs451260	Muscle_Skeletal	ARHGEF19	ENSG00000142632.12	205	236	0.240326	3.74497e-12
1_16525056_G_T_b37	rs451260	Esophagus_Mucosa	ARHGEF19	ENSG00000142632.12	148	169	0.236034	1.58188e-06
1_16525056_G_T_b37	rs451260	Lung	ARHGEF19	ENSG00000142632.12	161	184	0.240209	2.70492e-07
1_16525056_G_T_b37	rs451260	Colon_Transverse	ARHGEF19	ENSG00000142632.12	104	117	0.237805	3.56941e-06
1_16525056_G_T_b37	rs451260	Nerve_Tibial	ARHGEF19	ENSG00000142632.12	147	172	0.238227	3.05377e-09
1_16525056_G_T_b37	rs451260	Adipose_Subcutaneous	ARHGEF19	ENSG00000142632.12	153	173	0.224675	1.80877e-09
1_16525056_G_T_b37	rs451260	Heart_Left_Ventricle	ARHGEF19	ENSG00000142632.12	100	111	0.204044	4.79012e-06
1_16525056_G_T_b37	rs451260	Breast_Mammary_Tissue	ARHGEF19	ENSG00000142632.12	103	122	0.243028	8.80604e-08
1_16525333_C_T_b37	rs74394813	Brain_Cerebellar_Hemisphere	ARHGEF19	ENSG00000142632.12	29	30	0.12	4.7945e-07
1_16525333_C_T_b37	rs74394813	Artery_Aorta	ARHGEF19	ENSG00000142632.12	59	66	0.123596	1.79565e-27
1_16525333_C_T_b37	rs74394813	Artery_Tibial	ARHGEF19	ENSG00000142632.12	81	88	0.113402	1.10379e-21
1_16525333_C_T_b37	rs74394813	Heart_Atrial_Appendage	ARHGEF19	ENSG00000142632.12	59	64	0.121212	4.92469e-12
1_16525333_C_T_b37	rs74394813	Adipose_Visceral_Omentum	ARHGEF19	ENSG00000142632.12	66	71	0.113419	4.80853e-16
1_16525333_C_T_b37	rs74394813	Spleen	ARHGEF19	ENSG00000142632.12	27	29	0.0993151	8.724e-07
1_16525333_C_T_b37	rs74394813	Liver	ARHGEF19	ENSG00000142632.12	35	39	0.127451	2.5536e-08
1_16525333_C_T_b37	rs74394813	Skin_Sun_Exposed_Lower_leg	ARHGEF19	ENSG00000142632.12	82	88	0.10628	3.59068e-06
1_16525333_C_T_b37	rs74394813	Adipose_Subcutaneous	ARHGEF19	ENSG00000142632.12	79	87	0.112987	4.2928e-16
1_16525333_C_T_b37	rs74394813	Lung	ARHGEF19	ENSG00000142632.12	87	96	0.125326	8.27666e-22
1_16525333_C_T_b37	rs74394813	Whole_Blood	ARHGEF19	ENSG00000142632.12	76	83	0.112466	4.41517e-15
1_16525333_C_T_b37	rs74394813	Brain_Cerebellum	ARHGEF19	ENSG00000142632.12	32	33	0.107143	1.04808e-10
1_16525333_C_T_b37	rs74394813	Artery_Coronary	ARHGEF19	ENSG00000142632.12	31	33	0.108553	1.35182e-09
1_16525333_C_T_b37	rs74394813	Testis	ARHGEF19	ENSG00000142632.12	43	48	0.106667	2.13967e-11
1_16525333_C_T_b37	rs74394813	Brain_Caudate_basal_ganglia	ARHGEF19	ENSG00000142632.12	29	31	0.107639	4.45582e-06
1_16525333_C_T_b37	rs74394813	Muscle_Skeletal	ARHGEF19	ENSG00000142632.12	100	109	0.110998	6.57784e-13
1_16525333_C_T_b37	rs74394813	Breast_Mammary_Tissue	ARHGEF19	ENSG00000142632.12	50	54	0.10757	1.45969e-11
1_16525333_C_T_b37	rs74394813	Cells_Transformed_fibroblasts	ARHGEF19	ENSG00000142632.12	65	70	0.116667	2.9757e-17
1_16525333_C_T_b37	rs74394813	Colon_Sigmoid	ARHGEF19	ENSG00000142632.12	39	44	0.108374	1.0221e-09
1_16525333_C_T_b37	rs74394813	Esophagus_Gastroesophageal_Junction	ARHGEF19	ENSG00000142632.12	40	45	0.105634	1.63952e-12
1_16525333_C_T_b37	rs74394813	Esophagus_Muscularis	ARHGEF19	ENSG00000142632.12	69	75	0.11194	3.25479e-27
1_16525333_C_T_b37	rs74394813	Heart_Left_Ventricle	ARHGEF19	ENSG00000142632.12	60	64	0.117647	2.16356e-16
1_16525333_C_T_b37	rs74394813	Colon_Transverse	ARHGEF19	ENSG00000142632.12	52	57	0.115854	5.4653e-15
1_16525333_C_T_b37	rs74394813	Nerve_Tibial	ARHGEF19	ENSG00000142632.12	70	77	0.106648	4.10966e-21
1_16525333_C_T_b37	rs74394813	Brain_Amygdala	ARHGEF19	ENSG00000142632.12	24	26	0.147727	2.30567e-06
1_16525333_C_T_b37	rs74394813	Brain_Anterior_cingulate_cortex_BA24	ARHGEF19	ENSG00000142632.12	22	22	0.100917	9.77306e-06
1_16525333_C_T_b37	rs74394813	Brain_Cortex	ARHGEF19	ENSG00000142632.12	27	29	0.106618	1.76495e-05
1_16525333_C_T_b37	rs74394813	Stomach	ARHGEF19	ENSG00000142632.12	50	53	0.111814	4.87954e-06
1_16525549_C_T_b37	rs221032	Skin_Not_Sun_Exposed_Suprapubic	ARHGEF19	ENSG00000142632.12	139	160	0.238806	2.18754e-05
1_16525549_C_T_b37	rs221032	Esophagus_Muscularis	ARHGEF19	ENSG00000142632.12	141	160	0.238806	4.05265e-09
1_16525549_C_T_b37	rs221032	Whole_Blood	ARHGEF19	ENSG00000142632.12	149	172	0.233062	1.77816e-05
1_16525549_C_T_b37	rs221032	Esophagus_Gastroesophageal_Junction	ARHGEF19	ENSG00000142632.12	85	97	0.2277	2.80282e-06
1_16525549_C_T_b37	rs221032	Adipose_Visceral_Omentum	ARHGEF19	ENSG00000142632.12	134	154	0.246006	2.09879e-11
1_16525549_C_T_b37	rs221032	Muscle_Skeletal	ARHGEF19	ENSG00000142632.12	205	236	0.240326	3.74497e-12
1_16525549_C_T_b37	rs221032	Adrenal_Gland	ARHGEF19	ENSG00000142632.12	77	89	0.254286	2.45059e-05
1_16525549_C_T_b37	rs221032	Colon_Transverse	ARHGEF19	ENSG00000142632.12	104	117	0.237805	3.56941e-06
1_16525549_C_T_b37	rs221032	Lung	ARHGEF19	ENSG00000142632.12	161	184	0.240209	2.70492e-07
1_16525549_C_T_b37	rs221032	Nerve_Tibial	ARHGEF19	ENSG00000142632.12	147	172	0.238227	3.05377e-09
1_16525549_C_T_b37	rs221032	Ovary	ARHGEF19	ENSG00000142632.12	52	59	0.241803	3.54924e-07
1_16525549_C_T_b37	rs221032	Breast_Mammary_Tissue	ARHGEF19	ENSG00000142632.12	103	122	0.243028	8.80604e-08
1_16525549_C_T_b37	rs221032	Heart_Left_Ventricle	ARHGEF19	ENSG00000142632.12	100	111	0.204044	4.79012e-06
1_16525549_C_T_b37	rs221032	Small_Intestine_Terminal_Ileum	ARHGEF19	ENSG00000142632.12	57	64	0.262295	4.5012e-06
1_16525549_C_T_b37	rs221032	Esophagus_Mucosa	ARHGEF19	ENSG00000142632.12	148	169	0.236034	1.58188e-06
1_16525549_C_T_b37	rs221032	Adipose_Subcutaneous	ARHGEF19	ENSG00000142632.12	153	173	0.224675	1.80877e-09
1_16525887_G_C_b37	rs221033	Muscle_Skeletal	ARHGEF19	ENSG00000142632.12	205	236	0.240326	3.74497e-12
1_16525887_G_C_b37	rs221033	Adrenal_Gland	ARHGEF19	ENSG00000142632.12	77	89	0.254286	2.45059e-05
1_16525887_G_C_b37	rs221033	Nerve_Tibial	ARHGEF19	ENSG00000142632.12	147	172	0.238227	3.05377e-09
1_16525887_G_C_b37	rs221033	Esophagus_Gastroesophageal_Junction	ARHGEF19	ENSG00000142632.12	85	97	0.2277	2.80282e-06
1_16525887_G_C_b37	rs221033	Adipose_Visceral_Omentum	ARHGEF19	ENSG00000142632.12	134	154	0.246006	2.09879e-11
1_16525887_G_C_b37	rs221033	Esophagus_Muscularis	ARHGEF19	ENSG00000142632.12	141	160	0.238806	4.05265e-09
1_16525887_G_C_b37	rs221033	Colon_Transverse	ARHGEF19	ENSG00000142632.12	104	117	0.237805	3.56941e-06
1_16525887_G_C_b37	rs221033	Whole_Blood	ARHGEF19	ENSG00000142632.12	149	172	0.233062	1.77816e-05
1_16525887_G_C_b37	rs221033	Small_Intestine_Terminal_Ileum	ARHGEF19	ENSG00000142632.12	57	64	0.262295	4.5012e-06
1_16525887_G_C_b37	rs221033	Breast_Mammary_Tissue	ARHGEF19	ENSG00000142632.12	103	122	0.243028	8.80604e-08
1_16525887_G_C_b37	rs221033	Lung	ARHGEF19	ENSG00000142632.12	161	184	0.240209	2.70492e-07
1_16525887_G_C_b37	rs221033	Esophagus_Mucosa	ARHGEF19	ENSG00000142632.12	148	169	0.236034	1.58188e-06
1_16525887_G_C_b37	rs221033	Skin_Not_Sun_Exposed_Suprapubic	ARHGEF19	ENSG00000142632.12	139	160	0.238806	2.18754e-05
1_16525887_G_C_b37	rs221033	Adipose_Subcutaneous	ARHGEF19	ENSG00000142632.12	153	173	0.224675	1.80877e-09
1_16525887_G_C_b37	rs221033	Ovary	ARHGEF19	ENSG00000142632.12	52	59	0.241803	3.54924e-07
1_16525887_G_C_b37	rs221033	Heart_Left_Ventricle	ARHGEF19	ENSG00000142632.12	100	111	0.204044	4.79012e-06
1_16525966_T_C_b37	rs221034	Whole_Blood	ARHGEF19	ENSG00000142632.12	150	173	0.234417	1.07806e-05
1_16525966_T_C_b37	rs221034	Adrenal_Gland	ARHGEF19	ENSG00000142632.12	77	89	0.254286	2.45059e-05
1_16525966_T_C_b37	rs221034	Esophagus_Muscularis	ARHGEF19	ENSG00000142632.12	141	160	0.238806	4.05265e-09
1_16525966_T_C_b37	rs221034	Esophagus_Gastroesophageal_Junction	ARHGEF19	ENSG00000142632.12	86	98	0.230047	1.54131e-06
1_16525966_T_C_b37	rs221034	Esophagus_Mucosa	ARHGEF19	ENSG00000142632.12	148	169	0.236034	1.58188e-06
1_16525966_T_C_b37	rs221034	Colon_Transverse	ARHGEF19	ENSG00000142632.12	105	118	0.239837	2.54382e-06
1_16525966_T_C_b37	rs221034	Breast_Mammary_Tissue	ARHGEF19	ENSG00000142632.12	104	123	0.24502	4.44362e-08
1_16525966_T_C_b37	rs221034	Adipose_Visceral_Omentum	ARHGEF19	ENSG00000142632.12	135	155	0.247604	8.6703e-12
1_16525966_T_C_b37	rs221034	Small_Intestine_Terminal_Ileum	ARHGEF19	ENSG00000142632.12	57	64	0.262295	4.5012e-06
1_16525966_T_C_b37	rs221034	Skin_Not_Sun_Exposed_Suprapubic	ARHGEF19	ENSG00000142632.12	139	160	0.238806	2.18754e-05
1_16525966_T_C_b37	rs221034	Ovary	ARHGEF19	ENSG00000142632.12	52	59	0.241803	3.54924e-07
1_16525966_T_C_b37	rs221034	Adipose_Subcutaneous	ARHGEF19	ENSG00000142632.12	153	173	0.224675	1.80877e-09
1_16525966_T_C_b37	rs221034	Muscle_Skeletal	ARHGEF19	ENSG00000142632.12	206	237	0.241344	3.10886e-12
1_16525966_T_C_b37	rs221034	Heart_Left_Ventricle	ARHGEF19	ENSG00000142632.12	101	112	0.205882	3.31763e-06
1_16525966_T_C_b37	rs221034	Nerve_Tibial	ARHGEF19	ENSG00000142632.12	147	172	0.238227	3.05377e-09
1_16525966_T_C_b37	rs221034	Lung	ARHGEF19	ENSG00000142632.12	161	184	0.240209	2.70492e-07
1_16526193_C_CCT_b37	rs33945403	Breast_Mammary_Tissue	ARHGEF19	ENSG00000142632.12	102	121	0.241036	4.43222e-07
1_16526193_C_CCT_b37	rs33945403	Skin_Not_Sun_Exposed_Suprapubic	ARHGEF19	ENSG00000142632.12	136	156	0.233533	1.37288e-05
1_16526193_C_CCT_b37	rs33945403	Small_Intestine_Terminal_Ileum	ARHGEF19	ENSG00000142632.12	57	64	0.262295	5.8301e-06
1_16526193_C_CCT_b37	rs33945403	Ovary	ARHGEF19	ENSG00000142632.12	52	59	0.241803	1.73725e-07
1_16526193_C_CCT_b37	rs33945403	Lung	ARHGEF19	ENSG00000142632.12	161	184	0.240209	4.42791e-07
1_16526193_C_CCT_b37	rs33945403	Heart_Left_Ventricle	ARHGEF19	ENSG00000142632.12	100	111	0.204044	1.22363e-05
1_16526193_C_CCT_b37	rs33945403	Esophagus_Gastroesophageal_Junction	ARHGEF19	ENSG00000142632.12	87	99	0.232394	3.73604e-06
1_16526193_C_CCT_b37	rs33945403	Esophagus_Muscularis	ARHGEF19	ENSG00000142632.12	139	157	0.23503	2.00857e-08
1_16526193_C_CCT_b37	rs33945403	Adipose_Visceral_Omentum	ARHGEF19	ENSG00000142632.12	132	151	0.241987	4.08169e-11
1_16526193_C_CCT_b37	rs33945403	Adrenal_Gland	ARHGEF19	ENSG00000142632.12	77	89	0.254286	3.39515e-06
1_16526193_C_CCT_b37	rs33945403	Adipose_Subcutaneous	ARHGEF19	ENSG00000142632.12	152	171	0.222656	1.016e-09
1_16526193_C_CCT_b37	rs33945403	Whole_Blood	ARHGEF19	ENSG00000142632.12	150	172	0.233696	2.28366e-05
1_16526193_C_CCT_b37	rs33945403	Esophagus_Mucosa	ARHGEF19	ENSG00000142632.12	148	168	0.235294	4.46749e-07
1_16526193_C_CCT_b37	rs33945403	Muscle_Skeletal	ARHGEF19	ENSG00000142632.12	204	234	0.238776	1.27644e-11
1_16526193_C_CCT_b37	rs33945403	Nerve_Tibial	ARHGEF19	ENSG00000142632.12	148	173	0.239612	5.46328e-09
1_16526193_C_CCT_b37	rs33945403	Colon_Transverse	ARHGEF19	ENSG00000142632.12	105	117	0.238776	4.43404e-06
1_16526529_G_A_b37	rs221035	Artery_Aorta	ARHGEF19	ENSG00000142632.12	126	151	0.282772	1.06537e-65
1_16526529_G_A_b37	rs221035	Liver	ARHGEF19	ENSG00000142632.12	79	91	0.297386	2.51852e-26
1_16526529_G_A_b37	rs221035	Whole_Blood	ARHGEF19	ENSG00000142632.12	178	215	0.291328	3.55195e-34
1_16526529_G_A_b37	rs221035	Pancreas	ARHGEF19	ENSG00000142632.12	100	122	0.277273	2.83328e-06
1_16526529_G_A_b37	rs221035	Brain_Putamen_basal_ganglia	ARHGEF19	ENSG00000142632.12	56	66	0.297297	3.74448e-12
1_16526529_G_A_b37	rs221035	Skin_Sun_Exposed_Lower_leg	ARHGEF19	ENSG00000142632.12	195	231	0.278986	8.01557e-13
1_16526529_G_A_b37	rs221035	Brain_Substantia_nigra	ARHGEF19	ENSG00000142632.12	38	44	0.275	1.06789e-06
1_16526529_G_A_b37	rs221035	Artery_Tibial	ARHGEF19	ENSG00000142632.12	185	224	0.28866	5.98073e-67
1_16526529_G_A_b37	rs221035	Brain_Cortex	ARHGEF19	ENSG00000142632.12	62	72	0.264706	9.1466e-14
1_16526529_G_A_b37	rs221035	Colon_Sigmoid	ARHGEF19	ENSG00000142632.12	96	112	0.275862	1.47436e-26
1_16526529_G_A_b37	rs221035	Brain_Hypothalamus	ARHGEF19	ENSG00000142632.12	52	59	0.273148	3.69469e-08
1_16526529_G_A_b37	rs221035	Small_Intestine_Terminal_Ileum	ARHGEF19	ENSG00000142632.12	62	75	0.307377	7.5914e-25
1_16526529_G_A_b37	rs221035	Esophagus_Muscularis	ARHGEF19	ENSG00000142632.12	161	195	0.291045	3.66335e-65
1_16526529_G_A_b37	rs221035	Heart_Atrial_Appendage	ARHGEF19	ENSG00000142632.12	121	150	0.284091	9.5066e-28
1_16526529_G_A_b37	rs221035	Brain_Anterior_cingulate_cortex_BA24	ARHGEF19	ENSG00000142632.12	51	57	0.261468	1.24023e-07
1_16526529_G_A_b37	rs221035	Esophagus_Gastroesophageal_Junction	ARHGEF19	ENSG00000142632.12	104	125	0.293427	9.53249e-36
1_16526529_G_A_b37	rs221035	Pituitary	ARHGEF19	ENSG00000142632.12	73	82	0.261146	5.26435e-07
1_16526529_G_A_b37	rs221035	Brain_Caudate_basal_ganglia	ARHGEF19	ENSG00000142632.12	69	79	0.274306	6.23598e-08
1_16526529_G_A_b37	rs221035	Stomach	ARHGEF19	ENSG00000142632.12	119	140	0.295359	5.19872e-12
1_16526529_G_A_b37	rs221035	Testis	ARHGEF19	ENSG00000142632.12	101	121	0.268889	6.05469e-26
1_16526529_G_A_b37	rs221035	Spleen	ARHGEF19	ENSG00000142632.12	69	87	0.297945	4.17525e-24
1_16526529_G_A_b37	rs221035	Brain_Amygdala	ARHGEF19	ENSG00000142632.12	45	50	0.284091	2.3084e-09
1_16526529_G_A_b37	rs221035	Esophagus_Mucosa	ARHGEF19	ENSG00000142632.12	173	212	0.296089	1.96418e-13
1_16526529_G_A_b37	rs221035	Brain_Hippocampus	ARHGEF19	ENSG00000142632.12	49	57	0.256757	1.97028e-10
1_16526529_G_A_b37	rs221035	Nerve_Tibial	ARHGEF19	ENSG00000142632.12	167	201	0.278393	1.37811e-55
1_16526529_G_A_b37	rs221035	Adipose_Subcutaneous	ARHGEF19	ENSG00000142632.12	186	221	0.287013	1.61828e-61
1_16526529_G_A_b37	rs221035	Adipose_Visceral_Omentum	ARHGEF19	ENSG00000142632.12	153	181	0.289137	2.98806e-50
1_16526529_G_A_b37	rs221035	Brain_Cerebellum	ARHGEF19	ENSG00000142632.12	73	85	0.275974	3.32969e-22
1_16526529_G_A_b37	rs221035	Brain_Nucleus_accumbens_basal_ganglia	ARHGEF19	ENSG00000142632.12	58	67	0.257692	4.93705e-09
1_16526529_G_A_b37	rs221035	Artery_Coronary	ARHGEF19	ENSG00000142632.12	71	84	0.276316	1.18455e-18
1_16526529_G_A_b37	rs221035	Cells_EBV-transformed_lymphocytes	ARHGEF19	ENSG00000142632.12	61	73	0.311966	2.36744e-21
1_16526529_G_A_b37	rs221035	Cells_Transformed_fibroblasts	ARHGEF19	ENSG00000142632.12	145	173	0.288333	3.45864e-69
1_16526529_G_A_b37	rs221035	Heart_Left_Ventricle	ARHGEF19	ENSG00000142632.12	128	155	0.284926	2.61177e-40
1_16526529_G_A_b37	rs221035	Muscle_Skeletal	ARHGEF19	ENSG00000142632.12	237	284	0.289206	3.29305e-39
1_16526529_G_A_b37	rs221035	Colon_Transverse	ARHGEF19	ENSG00000142632.12	121	149	0.302846	2.04626e-40
1_16526529_G_A_b37	rs221035	Brain_Cerebellar_Hemisphere	ARHGEF19	ENSG00000142632.12	64	72	0.288	8.28508e-18
1_16526529_G_A_b37	rs221035	Lung	ARHGEF19	ENSG00000142632.12	183	217	0.28329	2.50799e-40
1_16526529_G_A_b37	rs221035	Brain_Frontal_Cortex_BA9	ARHGEF19	ENSG00000142632.12	57	64	0.271186	7.4549e-11
1_16526529_G_A_b37	rs221035	Skin_Not_Sun_Exposed_Suprapubic	ARHGEF19	ENSG00000142632.12	159	185	0.276119	4.00043e-05
1_16526529_G_A_b37	rs221035	Breast_Mammary_Tissue	ARHGEF19	ENSG00000142632.12	119	139	0.276892	1.03543e-24
1_16527165_G_A_b37	rs7527137	Small_Intestine_Terminal_Ileum	ARHGEF19	ENSG00000142632.12	72	91	0.372951	1.47837e-05
1_16527165_G_A_b37	rs7527137	Artery_Tibial	ARHGEF19	ENSG00000142632.12	254	344	0.443299	4.36375e-31
1_16527165_G_A_b37	rs7527137	Artery_Coronary	ARHGEF19	ENSG00000142632.12	92	134	0.440789	8.06336e-09
1_16527165_G_A_b37	rs7527137	Brain_Cerebellum	ARHGEF19	ENSG00000142632.12	104	141	0.457792	2.37294e-05
1_16527165_G_A_b37	rs7527137	Heart_Left_Ventricle	ARHGEF19	ENSG00000142632.12	179	254	0.466912	1.40941e-08
1_16527165_G_A_b37	rs7527137	Thyroid	ARHGEF19	ENSG00000142632.12	254	350	0.438596	1.89086e-06
1_16527165_G_A_b37	rs7527137	Esophagus_Muscularis	ARHGEF19	ENSG00000142632.12	217	290	0.432836	3.27614e-15
1_16527165_G_A_b37	rs7527137	Heart_Atrial_Appendage	ARHGEF19	ENSG00000142632.12	176	240	0.454545	4.66396e-09
1_16527165_G_A_b37	rs7527137	Liver	ARHGEF19	ENSG00000142632.12	97	134	0.437909	2.58038e-09
1_16527165_G_A_b37	rs7527137	Artery_Aorta	ARHGEF19	ENSG00000142632.12	173	234	0.438202	1.95249e-25
1_16527165_G_A_b37	rs7527137	Colon_Transverse	ARHGEF19	ENSG00000142632.12	153	204	0.414634	7.71679e-09
1_16527165_G_A_b37	rs7527137	Colon_Sigmoid	ARHGEF19	ENSG00000142632.12	135	179	0.440887	2.57742e-08
1_16527165_G_A_b37	rs7527137	Cells_Transformed_fibroblasts	ARHGEF19	ENSG00000142632.12	194	252	0.42	6.74016e-23
1_16527165_G_A_b37	rs7527137	Muscle_Skeletal	ARHGEF19	ENSG00000142632.12	316	419	0.42668	7.352e-06
1_16527165_G_A_b37	rs7527137	Whole_Blood	ARHGEF19	ENSG00000142632.12	238	318	0.430894	8.42783e-08
1_16527165_G_A_b37	rs7527137	Esophagus_Gastroesophageal_Junction	ARHGEF19	ENSG00000142632.12	139	188	0.441315	4.11652e-07
1_16527165_G_A_b37	rs7527137	Testis	ARHGEF19	ENSG00000142632.12	142	193	0.428889	2.01341e-10
1_16527165_G_A_b37	rs7527137	Spleen	ARHGEF19	ENSG00000142632.12	83	113	0.386986	8.41336e-07
1_16527165_G_A_b37	rs7527137	Lung	ARHGEF19	ENSG00000142632.12	252	343	0.447781	3.21587e-10
1_16527165_G_A_b37	rs7527137	Cells_EBV-transformed_lymphocytes	ARHGEF19	ENSG00000142632.12	72	88	0.376068	4.1686e-07
1_16527165_G_A_b37	rs7527137	Nerve_Tibial	ARHGEF19	ENSG00000142632.12	234	319	0.441828	6.6526e-09
1_16527165_G_A_b37	rs7527137	Adipose_Subcutaneous	ARHGEF19	ENSG00000142632.12	252	338	0.438961	1.28721e-12
1_16527165_G_A_b37	rs7527137	Adipose_Visceral_Omentum	ARHGEF19	ENSG00000142632.12	199	269	0.429712	2.51405e-07
1_16527321_A_G_b37	rs221036	Heart_Left_Ventricle	ARHGEF19	ENSG00000142632.12	106	119	0.21875	3.2806e-07
1_16527321_A_G_b37	rs221036	Esophagus_Muscularis	ARHGEF19	ENSG00000142632.12	145	165	0.247006	6.88315e-09
1_16527321_A_G_b37	rs221036	Esophagus_Gastroesophageal_Junction	ARHGEF19	ENSG00000142632.12	88	101	0.237089	4.70773e-06
1_16527321_A_G_b37	rs221036	Adrenal_Gland	ARHGEF19	ENSG00000142632.12	81	93	0.265714	5.5498e-06
1_16527321_A_G_b37	rs221036	Muscle_Skeletal	ARHGEF19	ENSG00000142632.12	214	245	0.25	3.33677e-12
1_16527321_A_G_b37	rs221036	Adipose_Subcutaneous	ARHGEF19	ENSG00000142632.12	160	180	0.234375	4.07127e-10
1_16527321_A_G_b37	rs221036	Lung	ARHGEF19	ENSG00000142632.12	165	189	0.246736	1.43852e-07
1_16527321_A_G_b37	rs221036	Esophagus_Mucosa	ARHGEF19	ENSG00000142632.12	152	174	0.243697	1.37998e-06
1_16527321_A_G_b37	rs221036	Small_Intestine_Terminal_Ileum	ARHGEF19	ENSG00000142632.12	59	66	0.270492	5.02984e-06
1_16527321_A_G_b37	rs221036	Colon_Transverse	ARHGEF19	ENSG00000142632.12	107	121	0.246939	2.84363e-06
1_16527321_A_G_b37	rs221036	Nerve_Tibial	ARHGEF19	ENSG00000142632.12	154	180	0.25	5.18537e-10
1_16527321_A_G_b37	rs221036	Whole_Blood	ARHGEF19	ENSG00000142632.12	154	177	0.240489	1.64355e-05
1_16527321_A_G_b37	rs221036	Breast_Mammary_Tissue	ARHGEF19	ENSG00000142632.12	109	128	0.25498	1.33413e-07
1_16527321_A_G_b37	rs221036	Ovary	ARHGEF19	ENSG00000142632.12	56	63	0.258197	2.08366e-07
1_16527321_A_G_b37	rs221036	Adipose_Visceral_Omentum	ARHGEF19	ENSG00000142632.12	135	156	0.25	3.35923e-11
1_16527321_A_G_b37	rs221036	Skin_Not_Sun_Exposed_Suprapubic	ARHGEF19	ENSG00000142632.12	144	166	0.249249	3.49694e-05
1_16528218_G_T_b37	rs6676143	Small_Intestine_Terminal_Ileum	ARHGEF19	ENSG00000142632.12	80	102	0.418033	3.62572e-06
1_16528218_G_T_b37	rs6676143	Esophagus_Muscularis	ARHGEF19	ENSG00000142632.12	228	306	0.456716	1.51648e-15
1_16528218_G_T_b37	rs6676143	Testis	ARHGEF19	ENSG00000142632.12	151	205	0.455556	1.88206e-11
1_16528218_G_T_b37	rs6676143	Brain_Cerebellar_Hemisphere	ARHGEF19	ENSG00000142632.12	86	115	0.46	1.2942e-05
1_16528218_G_T_b37	rs6676143	Heart_Left_Ventricle	ARHGEF19	ENSG00000142632.12	192	270	0.496324	3.90092e-09
1_16528218_G_T_b37	rs6676143	Adipose_Subcutaneous	ARHGEF19	ENSG00000142632.12	272	365	0.474026	7.5285e-15
1_16528218_G_T_b37	rs6676143	Lung	ARHGEF19	ENSG00000142632.12	264	359	0.468668	5.78039e-09
1_16528218_G_T_b37	rs6676143	Nerve_Tibial	ARHGEF19	ENSG00000142632.12	249	339	0.469529	1.15778e-10
1_16528218_G_T_b37	rs6676143	Artery_Coronary	ARHGEF19	ENSG00000142632.12	100	144	0.473684	7.01867e-10
1_16528218_G_T_b37	rs6676143	Artery_Aorta	ARHGEF19	ENSG00000142632.12	183	248	0.464419	3.9171e-28
1_16528218_G_T_b37	rs6676143	Artery_Tibial	ARHGEF19	ENSG00000142632.12	268	363	0.467784	2.73648e-34
1_16528218_G_T_b37	rs6676143	Cells_EBV-transformed_lymphocytes	ARHGEF19	ENSG00000142632.12	77	96	0.410256	2.80534e-10
1_16528218_G_T_b37	rs6676143	Thyroid	ARHGEF19	ENSG00000142632.12	273	374	0.468672	2.07681e-06
1_16528218_G_T_b37	rs6676143	Whole_Blood	ARHGEF19	ENSG00000142632.12	255	341	0.46206	7.08867e-10
1_16528218_G_T_b37	rs6676143	Colon_Sigmoid	ARHGEF19	ENSG00000142632.12	145	192	0.472906	4.25126e-09
1_16528218_G_T_b37	rs6676143	Spleen	ARHGEF19	ENSG00000142632.12	93	127	0.434932	2.18693e-07
1_16528218_G_T_b37	rs6676143	Adipose_Visceral_Omentum	ARHGEF19	ENSG00000142632.12	215	287	0.458466	2.35727e-08
1_16528218_G_T_b37	rs6676143	Esophagus_Gastroesophageal_Junction	ARHGEF19	ENSG00000142632.12	149	199	0.467136	6.3905e-08
1_16528218_G_T_b37	rs6676143	Cells_Transformed_fibroblasts	ARHGEF19	ENSG00000142632.12	205	267	0.445	4.58645e-27
1_16528218_G_T_b37	rs6676143	Muscle_Skeletal	ARHGEF19	ENSG00000142632.12	338	448	0.456212	4.85283e-07
1_16528218_G_T_b37	rs6676143	Heart_Atrial_Appendage	ARHGEF19	ENSG00000142632.12	189	255	0.482955	3.65547e-08
1_16528218_G_T_b37	rs6676143	Liver	ARHGEF19	ENSG00000142632.12	105	142	0.464052	1.66778e-09
1_16528218_G_T_b37	rs6676143	Colon_Transverse	ARHGEF19	ENSG00000142632.12	163	219	0.445122	3.76753e-11
1_16528233_G_A_b37	rs221037	Esophagus_Mucosa	ARHGEF19	ENSG00000142632.12	152	175	0.244413	4.50546e-06
1_16528233_G_A_b37	rs221037	Skin_Not_Sun_Exposed_Suprapubic	ARHGEF19	ENSG00000142632.12	144	167	0.249254	5.14824e-05
1_16528233_G_A_b37	rs221037	Lung	ARHGEF19	ENSG00000142632.12	164	188	0.245431	1.14371e-07
1_16528233_G_A_b37	rs221037	Adrenal_Gland	ARHGEF19	ENSG00000142632.12	80	92	0.262857	2.34067e-05
1_16528233_G_A_b37	rs221037	Adipose_Subcutaneous	ARHGEF19	ENSG00000142632.12	160	181	0.235065	7.90798e-10
1_16528233_G_A_b37	rs221037	Ovary	ARHGEF19	ENSG00000142632.12	55	62	0.254098	2.91844e-07
1_16528233_G_A_b37	rs221037	Adipose_Visceral_Omentum	ARHGEF19	ENSG00000142632.12	136	158	0.252396	3.23683e-11
1_16528233_G_A_b37	rs221037	Esophagus_Gastroesophageal_Junction	ARHGEF19	ENSG00000142632.12	87	100	0.234742	2.00827e-06
1_16528233_G_A_b37	rs221037	Heart_Left_Ventricle	ARHGEF19	ENSG00000142632.12	105	118	0.216912	2.09331e-07
1_16528233_G_A_b37	rs221037	Small_Intestine_Terminal_Ileum	ARHGEF19	ENSG00000142632.12	58	65	0.266393	2.86397e-06
1_16528233_G_A_b37	rs221037	Muscle_Skeletal	ARHGEF19	ENSG00000142632.12	214	246	0.250509	1.29991e-12
1_16528233_G_A_b37	rs221037	Esophagus_Muscularis	ARHGEF19	ENSG00000142632.12	145	166	0.247761	1.43939e-09
1_16528233_G_A_b37	rs221037	Breast_Mammary_Tissue	ARHGEF19	ENSG00000142632.12	108	127	0.252988	5.17703e-08
1_16528233_G_A_b37	rs221037	Whole_Blood	ARHGEF19	ENSG00000142632.12	154	178	0.241192	7.9919e-06
1_16528233_G_A_b37	rs221037	Colon_Transverse	ARHGEF19	ENSG00000142632.12	107	122	0.247967	1.6375e-06
1_16528233_G_A_b37	rs221037	Nerve_Tibial	ARHGEF19	ENSG00000142632.12	153	179	0.247922	4.51978e-10
1_16528469_GCC_G_b37	rs58225172	Small_Intestine_Terminal_Ileum	ARHGEF19	ENSG00000142632.12	62	75	0.307377	7.5914e-25
1_16528469_GCC_G_b37	rs58225172	Whole_Blood	ARHGEF19	ENSG00000142632.12	178	215	0.29212	6.12901e-34
1_16528469_GCC_G_b37	rs58225172	Artery_Aorta	ARHGEF19	ENSG00000142632.12	126	151	0.282772	1.06537e-65
1_16528469_GCC_G_b37	rs58225172	Adipose_Subcutaneous	ARHGEF19	ENSG00000142632.12	185	220	0.286458	7.21454e-63
1_16528469_GCC_G_b37	rs58225172	Heart_Left_Ventricle	ARHGEF19	ENSG00000142632.12	126	153	0.282288	2.16242e-40
1_16528469_GCC_G_b37	rs58225172	Esophagus_Muscularis	ARHGEF19	ENSG00000142632.12	159	193	0.28979	1.9212e-65
1_16528469_GCC_G_b37	rs58225172	Pituitary	ARHGEF19	ENSG00000142632.12	72	81	0.257962	3.87766e-07
1_16528469_GCC_G_b37	rs58225172	Stomach	ARHGEF19	ENSG00000142632.12	118	139	0.295745	4.99797e-12
1_16528469_GCC_G_b37	rs58225172	Artery_Coronary	ARHGEF19	ENSG00000142632.12	70	83	0.273026	1.50026e-19
1_16528469_GCC_G_b37	rs58225172	Brain_Hippocampus	ARHGEF19	ENSG00000142632.12	48	56	0.252252	5.66329e-11
1_16528469_GCC_G_b37	rs58225172	Pancreas	ARHGEF19	ENSG00000142632.12	99	121	0.276256	3.84448e-06
1_16528469_GCC_G_b37	rs58225172	Lung	ARHGEF19	ENSG00000142632.12	181	215	0.281414	1.0968e-37
1_16528469_GCC_G_b37	rs58225172	Breast_Mammary_Tissue	ARHGEF19	ENSG00000142632.12	118	138	0.276	1.30024e-24
1_16528469_GCC_G_b37	rs58225172	Esophagus_Mucosa	ARHGEF19	ENSG00000142632.12	172	211	0.296348	1.36921e-13
1_16528469_GCC_G_b37	rs58225172	Brain_Frontal_Cortex_BA9	ARHGEF19	ENSG00000142632.12	56	63	0.266949	5.48956e-10
1_16528469_GCC_G_b37	rs58225172	Muscle_Skeletal	ARHGEF19	ENSG00000142632.12	236	283	0.288776	1.11729e-39
1_16528469_GCC_G_b37	rs58225172	Brain_Substantia_nigra	ARHGEF19	ENSG00000142632.12	37	43	0.26875	2.26972e-07
1_16528469_GCC_G_b37	rs58225172	Colon_Sigmoid	ARHGEF19	ENSG00000142632.12	95	111	0.274752	9.71227e-28
1_16528469_GCC_G_b37	rs58225172	Brain_Cerebellum	ARHGEF19	ENSG00000142632.12	72	84	0.272727	9.3073e-21
1_16528469_GCC_G_b37	rs58225172	Cells_EBV-transformed_lymphocytes	ARHGEF19	ENSG00000142632.12	61	73	0.311966	2.36744e-21
1_16528469_GCC_G_b37	rs58225172	Cells_Transformed_fibroblasts	ARHGEF19	ENSG00000142632.12	145	173	0.288333	3.45864e-69
1_16528469_GCC_G_b37	rs58225172	Brain_Anterior_cingulate_cortex_BA24	ARHGEF19	ENSG00000142632.12	50	56	0.256881	2.04115e-07
1_16528469_GCC_G_b37	rs58225172	Brain_Putamen_basal_ganglia	ARHGEF19	ENSG00000142632.12	55	65	0.292793	1.27234e-12
1_16528469_GCC_G_b37	rs58225172	Brain_Hypothalamus	ARHGEF19	ENSG00000142632.12	51	58	0.268519	7.03255e-08
1_16528469_GCC_G_b37	rs58225172	Brain_Cerebellar_Hemisphere	ARHGEF19	ENSG00000142632.12	63	71	0.284	1.7451e-18
1_16528469_GCC_G_b37	rs58225172	Heart_Atrial_Appendage	ARHGEF19	ENSG00000142632.12	119	148	0.281369	4.3903e-28
1_16528469_GCC_G_b37	rs58225172	Liver	ARHGEF19	ENSG00000142632.12	79	91	0.297386	2.51852e-26
1_16528469_GCC_G_b37	rs58225172	Nerve_Tibial	ARHGEF19	ENSG00000142632.12	165	199	0.276389	1.48788e-56
1_16528469_GCC_G_b37	rs58225172	Artery_Tibial	ARHGEF19	ENSG00000142632.12	183	222	0.287565	4.39459e-70
1_16528469_GCC_G_b37	rs58225172	Brain_Caudate_basal_ganglia	ARHGEF19	ENSG00000142632.12	68	78	0.270833	3.0559e-08
1_16528469_GCC_G_b37	rs58225172	Brain_Cortex	ARHGEF19	ENSG00000142632.12	62	72	0.264706	9.1466e-14
1_16528469_GCC_G_b37	rs58225172	Spleen	ARHGEF19	ENSG00000142632.12	69	87	0.3	4.04459e-23
1_16528469_GCC_G_b37	rs58225172	Colon_Transverse	ARHGEF19	ENSG00000142632.12	121	149	0.304082	3.28649e-40
1_16528469_GCC_G_b37	rs58225172	Testis	ARHGEF19	ENSG00000142632.12	101	121	0.270089	1.35832e-26
1_16528469_GCC_G_b37	rs58225172	Esophagus_Gastroesophageal_Junction	ARHGEF19	ENSG00000142632.12	104	125	0.293427	9.53249e-36
1_16528469_GCC_G_b37	rs58225172	Brain_Amygdala	ARHGEF19	ENSG00000142632.12	44	49	0.278409	2.87988e-09
1_16528469_GCC_G_b37	rs58225172	Adipose_Visceral_Omentum	ARHGEF19	ENSG00000142632.12	152	180	0.289389	2.01425e-50
1_16528469_GCC_G_b37	rs58225172	Skin_Sun_Exposed_Lower_leg	ARHGEF19	ENSG00000142632.12	194	230	0.27845	4.25058e-13
1_16528469_GCC_G_b37	rs58225172	Skin_Not_Sun_Exposed_Suprapubic	ARHGEF19	ENSG00000142632.12	157	183	0.274775	3.03945e-05
1_16528469_GCC_G_b37	rs58225172	Brain_Nucleus_accumbens_basal_ganglia	ARHGEF19	ENSG00000142632.12	57	66	0.253846	6.77173e-09
1_16528472_TACCCTAGGGACC_T_b37	rs200243292	Pituitary	ARHGEF19	ENSG00000142632.12	72	81	0.257962	3.87766e-07
1_16528472_TACCCTAGGGACC_T_b37	rs200243292	Adipose_Subcutaneous	ARHGEF19	ENSG00000142632.12	185	220	0.286458	7.21454e-63
1_16528472_TACCCTAGGGACC_T_b37	rs200243292	Heart_Left_Ventricle	ARHGEF19	ENSG00000142632.12	126	153	0.282288	2.16242e-40
1_16528472_TACCCTAGGGACC_T_b37	rs200243292	Pancreas	ARHGEF19	ENSG00000142632.12	99	121	0.276256	3.84448e-06
[truncated: 124,575 more rows]
