# Supplementary material for: Integration of genomics and transcriptomics predicts diabetic retinopathy susceptibility genes
Source: eLife. 2020 Nov 9;9:e59980. doi: 10.7554/eLife.59980 (PMC7728435; doi:10.7554/eLife.59980)
Supplement: Figure 4—source data 1. [file elife-59980-fig4-data1.xlsx]

## Sheet: Table 1
SNP METAP CHR POS GENE rs4081570 0.001817 19 15918647 UCA1 rs10001545 0.8868792 4 88176030 HSD17B11 rs1000281 0.04879765 15 72553422 PARP6 rs10004027 0.7946071 4 88292384 HSD17B11 rs10006766 0.8806172 4 88160018 HSD17B11 rs100087 0.2386829 11 74450436 XRRA1 rs10009948 0.8135963 4 88336684 HSD17B11 rs1001160 0.3008881 1 76358591 RABGGTB rs1001464 0.2580996 7 24769089 DFNA5 rs1001581 0.2703533 19 4…
rs10084835 0.3996495 4 88211056 HSD17B11 rs10085814 0.09836523 7 139064089 FMC1 rs10085842 0.06364503 7 139064582 FMC1 rs10085901 0.100976 7 139108989 FMC1 rs10085902 0.1020626 7 139109105 FMC1 rs1009828 0.512379 21 44306696 PKNOX1 rs1009905 0.395198 7 129988689 CPA4 rs1011810 0.496205 1 42898633 RIMKLA rs1012015 0.8608401 14 94498027 IFI27L1 rs1012775 0.8503905 7 24848829 DFNA5 rs10130976 0.5688…
rs10151658 0.5829174 14 64612858 ESR2 rs10153557 0.8565445 2 212032875 KANSL1L rs10156094 0.7813031 7 76003967 YWHAG rs10158307 0.2073179 1 211813503 SLC30A1 rs10158309 0.2066964 1 211813550 SLC30A1 rs10158345 0.1783126 1 224062306 CAPN2 rs10162102 0.9441301 13 21404145 IL17D rs10162323 0.9428521 14 64668144 ESR2 rs10162452 0.06378965 14 23319172 HAUS4 rs10163515 0.0957537 17 64281637 PRKCA rs101…
rs10220850 0.7415767 15 72647441 PARP6 rs10221121 0.6551337 16 56840328 NUP93 rs10221529 0.7945411 19 19209951 TMEM161A rs10221803 0.5690008 2 110270250 SOWAHC rs10222474 0.8454218 3 99862551 FILIP1L rs10222732 0.2756805 4 88295008 HSD17B11 rs10224066 0.7827652 7 76004709 YWHAG rs10226437 0.8831884 7 129984990 CPA4 rs10227466 0.9377734 7 24843621 DFNA5 rs10228441 0.5194636 7 76032291 YWHAG rs1022…
rs1026496 0.8557817 12 70298792 CNOT2 rs1026497 0.8554642 12 70298873 CNOT2 rs10265 0.1630546 7 139026152 FMC1 rs10266412 0.9395028 7 73156211 ABHD11 rs10266515 0.7262381 7 24545032 DFNA5 rs10270398 0.1404197 7 76010456 YWHAG rs10270776 0.6590987 7 24673223 DFNA5 rs10271297 0.1091398 7 139052310 FMC1 rs10273527 0.2685805 7 139036598 FMC1 rs10276688 0.9022642 7 24558055 DFNA5 rs10276782 0.8009705 …
rs10408863 0.9535206 19 44008410 XRCC1 rs10409467 0.131076 19 14578369 PKN1 rs10409750 0.2250053 19 15791606 UCA1 rs10409856 0.8747399 19 50063040 FCGRT rs10410451 0.4226113 19 19181716 TMEM161A rs10410515 0.3546485 19 15953243 UCA1 rs10412446 0.7362239 19 50067508 FCGRT rs10415813 0.3185077 19 19689231 TMEM161A rs10416783 0.4995102 19 19133772 TMEM161A rs10416904 0.9349686 19 14578813 PKN1 rs104…
rs10468902 0.3488736 18 29417515 TRAPPC8 rs10468903 0.7013244 18 29418022 TRAPPC8 rs10469298 0.3687789 19 50024391 FCGRT rs10470440 0.6030994 3 136564849 SLC35G2 rs10471774 0.9258358 5 68616331 CENPH rs10471775 0.4882707 5 68641476 CENPH rs10474578 0.1720736 5 78542290 JMY rs1047799 0.0004173205 17 17095487 FLCN rs1048145 0.9970502 3 136667405 SLC35G2 rs10483639 0.3599881 14 55306457 GCH1 rs10483…
rs10497498 0.6707347 2 178479248 TTC30A rs10497499 0.767034 2 178472165 TTC30A rs10497500 0.2215255 2 178467748 TTC30A rs10497504 0.9003598 2 178370040 TTC30A rs10497506 0.6716569 2 178346574 TTC30A rs10497551 0.2622304 2 180781544 CWC22 rs10497553 0.4770501 2 180823590 CWC22 rs10497554 0.2055975 2 180830251 CWC22 rs10497555 0.3311428 2 180864967 CWC22 rs10498471 0.30475 14 55353717 GCH1 rs104985…
rs10521328 0.3209128 17 17274398 FLCN rs1052429 0.197976 16 69975360 COG4 rs1052618 0.6022759 3 136574501 SLC35G2 rs1053874 0.6217896 16 3707747 CLUAP1 rs1053962 0.3555185 7 24703298 DFNA5 rs1055055 0.5896445 1 42880516 RIMKLA rs1055099 0.5366117 19 43979589 XRCC1 rs1055690 0.9681745 3 141466147 RNF7 rs1056810 0.6372363 14 94524216 IFI27L1 rs1058074 0.953667 1 67876484 IL12RB2 rs1059779 0.3750513…
rs10784838 0.2055189 12 70757341 CNOT2 rs10788662 0.1923633 1 17644587 PADI4 rs10788664 0.457005 1 17647475 PADI4 rs10789417 0.8007494 1 43055243 RIMKLA rs10792110 0.5015829 11 57536346 CTNND1 rs10792152 0.1803156 11 58026197 CTNND1 rs10792153 0.1804076 11 58027600 CTNND1 rs10792155 0.1806564 11 58032310 CTNND1 rs10792156 0.179994 11 58034543 CTNND1 rs10792166 0.04571677 11 58155086 CTNND1 rs1079…
rs10870742 0.6844475 13 21258698 IL17D rs10873447 0.002273348 14 94572749 IFI27L1 rs10873797 0.3094091 1 76377191 RABGGTB rs10875687 0.1458968 12 48134214 SLC48A1 rs10879039 0.8806359 12 70290921 CNOT2 rs10879061 0.02109911 12 70342407 CNOT2 rs10879063 0.03330486 12 70350469 CNOT2 rs10879065 0.1549718 12 70351684 CNOT2 rs10879077 0.4969332 12 70429956 CNOT2 rs10879097 0.1311591 12 70543399 CNOT2 …
rs10899060 0.1990706 11 74746631 XRRA1 rs10899065 0.9150508 11 74769574 XRRA1 rs10899068 0.7214318 11 74785720 XRRA1 rs10899075 0.7216275 11 74854669 XRRA1 rs10899076 0.9142517 11 74857436 XRRA1 rs10901173 0.3012533 9 135285010 CEL rs10906692 0.1066626 10 14583701 FAM107B rs10906694 0.1040114 10 14590010 FAM107B rs10906695 0.1036295 10 14593858 FAM107B rs10906696 0.103467 10 14597552 FAM107B rs10…
rs10952936 0.9309902 7 76139453 YWHAG rs10954268 0.6231759 7 130013024 CPA4 rs10954646 0.09835669 7 139061069 FMC1 rs10961 0.2614188 1 223962929 CAPN2 rs11018152 0.2902679 10 129288822 MKI67 rs11029 0.5970589 13 28239940 POLR1D rs1105509 0.8221285 3 130955204 NUDT16P1 rs1105670 0.6601698 1 42870338 RIMKLA rs1105748 0.6388188 18 12663152 SPIRE1 rs1106074 0.3759576 2 178507418 TTC30A rs11071323 0.0…
rs11079016 0.7549428 17 39976024 NT5C3B rs11079018 0.138277 17 40005650 NT5C3B rs11079019 0.3569583 17 40014076 NT5C3B rs11079020 0.6724462 17 40017491 NT5C3B rs11079024 0.1921493 17 40063083 NT5C3B rs1107960 0.007496234 14 55384340 GCH1 rs11079644 0.7331874 17 64144613 PRKCA rs11080330 0.7612318 17 33576894 NLE1 rs11080585 0.1556056 18 12589240 SPIRE1 rs11080590 0.1429377 18 12621994 SPIRE1 rs11…
rs11161912 0.9970506 1 76405162 RABGGTB rs11163915 0.1104617 1 76130199 RABGGTB rs11163917 0.7398012 1 76131068 RABGGTB rs11163927 0.6902979 1 76132792 RABGGTB rs11164035 0.507223 1 76175274 RABGGTB rs11167267 0.9993278 20 34109273 UQCC1 rs11168232 0.5976805 12 48157198 SLC48A1 rs11168236 0.7897949 12 48178604 SLC48A1 rs1117380 0.1132508 13 28260105 POLR1D rs11177804 0.4142823 12 70113001 CNOT2 r…
rs11203368 0.6384701 1 17666508 PADI4 rs11209046 0.4326148 1 67773649 IL12RB2 rs11209050 0.6287409 1 67791736 IL12RB2 rs11209059 0.9943105 1 67840698 IL12RB2 rs11209061 0.7682439 1 67847488 IL12RB2 rs11209252 0.2538421 1 68747451 IL12RB2 rs11210533 0.2242437 1 42305857 RIMKLA rs11210622 0.8497012 1 42822089 RIMKLA rs11210627 0.7792834 1 42847923 RIMKLA rs11210628 0.7427343 1 42850403 RIMKLA rs112…
rs11236332 0.5936947 11 74825823 XRRA1 rs11236348 0.9390254 11 74856481 XRRA1 rs11236349 0.9201163 11 74856517 XRRA1 rs11236359 0.2974827 11 74870884 XRRA1 rs1124943 0.1773045 1 223993624 CAPN2 rs1124961 0.111314 17 17038385 FLCN rs1125030 0.2349799 19 43999634 XRCC1 rs1125609 0.3067946 11 74546905 XRRA1 rs11259153 0.3860872 10 14567254 FAM107B rs11259155 0.3582949 10 14567412 FAM107B rs11259158 …
rs1130741 0.2640634 15 75189930 FAM219B rs11316 0.2100089 7 73246555 ABHD11 rs113187 0.4060705 11 74503168 XRRA1 rs1132990 0.3733471 19 50028163 FCGRT rs1133067 0.1052317 7 139053069 FMC1 rs1133068 0.1040029 7 139053143 FMC1 rs1133322 0.3523408 15 75212357 FAM219B rs1133323 0.3528909 15 75212225 FAM219B rs1134074 0.3993323 16 70395387 COG4 rs1134597 0.4364986 16 3589110 CLUAP1 rs1135237 0.1098983…
rs1153946 0.9810656 1 223960775 CAPN2 rs1153950 0.8477882 1 223959796 CAPN2 rs1153952 0.9855429 1 223958547 CAPN2 rs1153954 0.909435 1 223957335 CAPN2 rs1153976 0.4357111 12 48002400 SLC48A1 rs11541143 0.8837569 2 110302464 SOWAHC rs11542226 0.9763557 3 141464231 RNF7 rs11543230 0.5318207 1 16785564 ARHGEF19 rs11543947 0.2112752 14 23504021 HAUS4 rs11552972 0.8688728 13 114748139 RASA3 rs1155845 …
rs11621265 0.06715747 14 55822095 GCH1 rs11621291 0.8836945 14 94599583 IFI27L1 rs11622798 0.9738054 14 94509155 IFI27L1 rs11623253 0.06273263 14 94585064 IFI27L1 rs11623624 0.01850973 14 23406108 HAUS4 rs11624386 0.7471521 14 21419654 METTL17 rs11625204 0.1327028 14 55554917 GCH1 rs11626017 0.5300653 14 94543659 IFI27L1 rs11627286 0.8084972 14 94636004 IFI27L1 rs11627963 0.3660891 14 55426547 GC…
rs11645437 0.3013731 16 70575852 COG4 rs11645585 0.3981557 16 70536836 COG4 rs11646287 0.5719865 16 3719344 CLUAP1 rs11646318 0.225269 16 29265508 NFATC2IP rs11646653 0.3602681 16 28922149 NFATC2IP rs11647796 0.4856638 16 56696551 NUP93 rs11648068 0.8493872 16 3388994 CLUAP1 rs11648783 0.5638328 16 3406626 CLUAP1 rs11650944 0.5976203 17 16769659 FLCN rs11651796 0.136243 17 64343610 PRKCA rs116519…
rs11670204 0.5621536 19 19145390 TMEM161A rs11670326 0.0170574 19 15852544 UCA1 rs11671 0.1971892 19 2354787 LSM7 rs11671204 0.9120465 19 14652278 PKN1 rs11671900 0.6033159 19 4246693 STAP2 rs11672862 0.8765038 19 19262300 TMEM161A rs11673284 0.01773968 19 15851361 UCA1 rs11675027 0.9285712 2 210965866 KANSL1L rs11678875 0.71547 2 178509068 TTC30A rs11679519 0.6887453 2 178432110 TTC30A rs1167973…
rs11719857 0.9641429 3 99920884 FILIP1L rs11721 0.4699064 1 1152631 TNFRSF18 rs11721653 0.6776678 4 88274597 HSD17B11 rs11727803 0.390783 4 88213158 HSD17B11 rs11729 0.3706355 19 19230482 TMEM161A rs11732896 0.9213296 4 88287993 HSD17B11 rs11734330 0.7095665 4 88274740 HSD17B11 rs11735092 0.7234822 4 88226231 HSD17B11 rs11737402 0.7042875 4 88291439 HSD17B11 rs11744596 0.8275763 5 68519291 CENPH …
rs11795026 0.8108784 9 124916693 RC3H2 rs11799356 0.8675914 1 42931534 RIMKLA rs11802505 0.07762308 1 224065856 CAPN2 rs11804252 0.2413388 1 16642849 ARHGEF19 rs11804831 0.4397016 1 1194804 TNFRSF18 rs11805616 0.8670602 1 42966550 RIMKLA rs11806264 0.8849129 1 42916036 RIMKLA rs11810154 0.6144345 1 76239973 RABGGTB rs11820818 0.2711716 11 74784653 XRRA1 rs11827626 0.8702393 11 74532921 XRRA1 rs11…
rs1187873 0.1422855 14 55500251 GCH1 rs1187874 0.141759 14 55498103 GCH1 rs11880550 0.8093481 19 19272191 TMEM161A rs11887182 0.4055751 2 87364077 RGPD1 rs11889272 0.6421979 2 178432378 TTC30A rs11889989 0.9850651 2 110266383 SOWAHC rs11894165 0.5489961 2 207624412 ADAM23 rs11895445 0.4807147 2 180844070 CWC22 rs1189816 0.38083 14 57520465 NAA30 rs11900095 0.978685 2 211154011 KANSL1L rs1190081 0…
rs12019871 0.540635 13 114752144 RASA3 rs12027539 0.07786842 1 224063971 CAPN2 rs12030939 0.599897 1 17650818 PADI4 rs12033604 0.60337 1 17658697 PADI4 rs12037012 0.9057527 1 42916544 RIMKLA rs12037558 0.3794481 1 17608353 PADI4 rs12037653 0.9148708 1 17600317 PADI4 rs12037914 0.6029619 1 17658554 PADI4 rs12038299 0.1738754 1 223960392 CAPN2 rs12039696 0.8719411 1 42918754 RIMKLA rs12040633 0.177…
rs12105482 0.9358568 2 113697235 IL1B rs12113560 0.6141129 7 24843644 DFNA5 rs12116575 0.8082512 1 67912259 IL12RB2 rs12118542 0.7406461 1 42850546 RIMKLA rs12119170 0.7259962 1 42856160 RIMKLA rs12119764 0.3703589 1 16552772 ARHGEF19 rs12120676 0.2356079 1 16613660 ARHGEF19 rs12125933 0.1368747 1 76130920 RABGGTB rs12126155 0.04712059 1 76131555 RABGGTB rs1212641 0.1411987 14 55496131 GCH1 rs121…
rs12185471 0.8899702 18 12539644 SPIRE1 rs12187268 0.6945891 5 68625786 CENPH rs1218762 0.5805518 16 3405986 CLUAP1 rs12189248 0.1341545 5 78517143 JMY rs1218951 0.6698944 13 28224258 POLR1D rs1218959 0.05581979 13 28193877 POLR1D rs1222081 0.9188426 1 223978656 CAPN2 rs1222138 0.8228368 1 223931411 CAPN2 rs1222141 0.6858699 1 223926406 CAPN2 rs1222145 0.6354832 1 223924236 CAPN2 rs1222148 0.9750…
rs1232968 0.03697921 12 47961871 SLC48A1 rs12329764 0.6734431 21 44483248 PKNOX1 rs1232977 0.0241369 12 47967223 SLC48A1 rs1232981 0.001202116 12 47973661 SLC48A1 rs1232985 0.001478351 12 47983096 SLC48A1 rs1232987 0.03112054 12 47984214 SLC48A1 rs12330283 0.645851 3 136590411 SLC35G2 rs1233042 0.08964947 12 48055705 SLC48A1 rs1233046 0.008853425 12 48103324 SLC48A1 rs1233047 0.007569434 12 48059…
rs1240290 0.9055203 12 70274678 CNOT2 rs12403406 0.6630567 1 42871782 RIMKLA rs12403920 0.3586177 1 42881680 RIMKLA rs12405571 0.859903 1 42959296 RIMKLA rs12405981 0.7648549 1 67847843 IL12RB2 rs12408442 0.05907881 1 16492021 ARHGEF19 rs12408746 0.7244168 1 42856729 RIMKLA rs12409913 0.648576 1 42856912 RIMKLA rs12412629 0.1487287 10 14743063 FAM107B rs12418547 0.07851677 11 57751001 CTNND1 rs12…
rs12444248 0.1379917 16 53430300 AKTIP rs12444804 0.2860467 16 3723248 CLUAP1 rs12445430 0.6725457 16 3613126 CLUAP1 rs12445830 0.6923332 16 70502493 COG4 rs12446395 0.1312711 16 70502610 COG4 rs12446550 0.1663316 16 28543381 NFATC2IP rs12447040 0.6974704 16 3718703 CLUAP1 rs12447449 0.9420161 16 3880659 CLUAP1 rs12448257 0.8356398 16 3599655 CLUAP1 rs12448482 0.8318279 16 28838073 NFATC2IP rs124…
rs12470439 0.9909073 2 113701164 IL1B rs12471621 0.7812334 2 178502353 TTC30A rs12472089 0.4015327 2 113654849 IL1B rs12472480 0.6757981 2 207398557 ADAM23 rs12472939 0.2279857 2 158288658 CYTIP rs12473952 0.796812 2 207281625 ADAM23 rs12476559 0.3769035 2 211112436 KANSL1L rs12480622 0.3845345 20 34234620 UQCC1 rs12485299 0.3713431 3 99468666 FILIP1L rs12486660 0.4122325 3 100024553 FILIP1L rs12…
rs1255984 0.9672783 14 64654431 ESR2 rs1255986 0.8866114 14 64655161 ESR2 rs1255990 0.5810931 14 64661523 ESR2 rs1256030 0.628576 14 64747170 ESR2 rs1256031 0.6282781 14 64746179 ESR2 rs1256033 0.6241848 14 64745399 ESR2 rs1256036 0.8608014 14 64743332 ESR2 rs1256037 0.8608632 14 64743301 ESR2 rs1256038 0.8609849 14 64740739 ESR2 rs1256040 0.6097137 14 64738394 ESR2 rs1256043 0.8606439 14 6473428…
rs12568476 0.7374973 1 42865915 RIMKLA rs12568497 0.7363191 1 42866126 RIMKLA rs12568612 0.6688902 1 223879083 CAPN2 rs12568771 0.8425916 1 17613809 PADI4 rs12576129 0.5613815 11 74489069 XRRA1 rs12576444 0.7572381 11 74435861 XRRA1 rs12577127 0.3795527 11 74714008 XRRA1 rs12584025 0.5540961 13 21403968 IL17D rs12587434 0.331114 14 55325583 GCH1 rs12587898 0.02054435 14 94566675 IFI27L1 rs1258953…
rs12604640 0.3493368 18 29425755 TRAPPC8 rs12604691 0.9323326 18 29503266 TRAPPC8 rs12605240 0.3320754 18 12591483 SPIRE1 rs12605498 0.4143555 18 48524695 ME2 rs12606354 0.8926698 18 29509403 TRAPPC8 rs12606962 0.9228925 18 29503277 TRAPPC8 rs12607426 0.4084689 18 29407769 TRAPPC8 rs12607786 0.941523 18 29418177 TRAPPC8 rs12610690 0.1889088 19 2334866 LSM7 rs12611088 0.1273919 19 44072802 XRCC1 r…
rs12665866 0.4070195 7 24787279 DFNA5 rs12665974 0.3947182 7 24781824 DFNA5 rs12669044 0.4427049 7 24762350 DFNA5 rs12669879 0.2979052 7 108036161 PNPLA8 rs1268656 0.4178433 14 64647646 ESR2 rs1269056 0.8609521 14 64743890 ESR2 rs12693214 0.5074491 2 180825685 CWC22 rs12693215 0.5077667 2 180826007 CWC22 rs12694052 0.2991219 2 207166560 ADAM23 rs12700538 0.3681958 7 24637056 DFNA5 rs12700539 0.16…
rs1275980 0.3115638 2 26916969 KCNK3 rs1275982 0.3094281 2 26919089 KCNK3 rs1275985 0.3117192 2 26911745 KCNK3 rs1275986 0.3125648 2 26912079 KCNK3 rs1275988 0.3131412 2 26914364 KCNK3 rs12765591 0.4199806 10 14695387 FAM107B rs12770153 0.6322234 10 14662775 FAM107B rs12783048 0.8217502 10 14118707 FAM107B rs12785149 0.7683616 10 14687426 FAM107B rs1280380 0.4597103 15 57765574 CGNL1 rs1280387 0.…
rs12906612 0.84459 15 72472278 PARP6 rs12906942 0.9268315 15 72794405 PARP6 rs12907707 0.8692885 15 72606549 PARP6 rs12908814 0.890037 15 75132490 FAM219B rs12908883 0.8573617 15 72643285 PARP6 rs1291041 0.1839221 5 78443735 JMY rs12910475 0.8036342 15 72360440 PARP6 rs12911285 0.7042559 15 72552372 PARP6 rs12913457 0.120294 15 57752278 CGNL1 rs12914829 0.9357714 15 72836084 PARP6 rs12915561 0.85…
rs12961307 0.9485095 18 12513416 SPIRE1 rs12961711 0.6691186 18 12707767 SPIRE1 rs12962476 0.4007655 18 12607210 SPIRE1 rs12964717 0.666359 18 12704961 SPIRE1 rs12965549 0.6796879 18 12718647 SPIRE1 rs12966082 0.6911152 18 12727418 SPIRE1 rs12966424 0.8956847 18 12678486 SPIRE1 rs12966571 0.6807628 18 12736042 SPIRE1 rs12966726 0.8865036 18 12282611 SPIRE1 rs12967204 0.5845548 18 12648084 SPIRE1 …
rs13009071 0.9284292 2 210964891 KANSL1L rs13009207 0.6768499 2 178501632 TTC30A rs13009758 0.8826661 2 211101839 KANSL1L rs13010864 0.3343887 2 210722025 KANSL1L rs13011269 0.2161376 2 181784642 CWC22 rs13013030 0.3443796 2 210716930 KANSL1L rs13013349 0.655451 2 113600326 IL1B rs13014417 0.8234732 2 178417835 TTC30A rs13014512 0.9552817 2 178470851 TTC30A rs13015354 0.9139017 2 210853494 KANSL1…
rs13044228 0.3209604 20 48007608 ARFGEF2 rs13044736 0.5368022 20 47419905 ARFGEF2 rs13051222 0.5139212 21 44304784 PKNOX1 rs13051639 0.5256554 21 44290674 PKNOX1 rs13059754 0.9771047 3 99678490 FILIP1L rs13064704 0.4641304 3 99767541 FILIP1L rs13068 0.1003995 7 139104141 FMC1 rs13069311 0.4818504 3 99801628 FILIP1L rs13075615 0.8633439 3 136505832 SLC35G2 rs13082664 0.2846645 3 141421603 RNF7 rs1…
rs1320840 0.2751363 2 26949179 KCNK3 rs1320841 0.2760394 2 26945566 KCNK3 rs13225320 0.9617982 7 24870722 DFNA5 rs13227836 0.3580744 7 108064399 PNPLA8 rs13227841 0.2636131 7 73279482 ABHD11 rs13228028 0.269363 7 73225067 ABHD11 rs13228948 0.3656773 7 73154783 ABHD11 rs13229488 0.3975795 7 108126673 PNPLA8 rs13230759 0.4152601 7 24968612 DFNA5 rs13231119 0.8664287 7 24860221 DFNA5 rs13232463 0.31…
rs13380027 0.4673987 15 56787114 CGNL1 rs13395560 0.935035 2 207518810 ADAM23 rs13396148 0.3969701 2 207484372 ADAM23 rs13399433 0.3406221 2 207445945 ADAM23 rs13412 0.6283392 17 39967442 NT5C3B rs13412327 0.6459032 2 110291268 SOWAHC rs1341399 0.5658436 13 100341178 CLYBL rs13414802 0.3643157 2 210732686 KANSL1L rs13415601 0.8798924 2 211080124 KANSL1L rs13418239 0.5146195 2 180778890 CWC22 rs13…
rs1391520 0.3976788 1 76174752 RABGGTB rs13926 0.3448366 16 3724465 CLUAP1 rs1396510 0.2306934 14 57994965 NAA30 rs1396830 0.9079123 2 211136612 KANSL1L rs1396831 0.9202511 2 211136678 KANSL1L rs1397275 0.7237194 11 57730461 CTNND1 rs1398215 0.7472792 2 60527729 BCL11A rs1399509 0.214273 2 180862337 CWC22 rs14003 0.0001119426 17 17104714 FLCN rs1402325 0.4817628 19 44105736 XRCC1 rs1402326 0.5314…
rs1437808 0.4988832 17 4175846 UBE2G1 rs1437810 0.8121086 12 70498603 CNOT2 rs1446839 0.8875441 2 178475205 TTC30A rs1448903 0.4712424 2 207308961 ADAM23 rs1448905 0.4748536 2 207311915 ADAM23 rs1449266 0.3639101 15 73198334 PARP6 rs1449269 0.3629652 15 73194903 PARP6 rs1449270 0.4855759 15 73259907 PARP6 rs1455532 0.209526 17 39611078 NT5C3B rs1455533 0.2094282 17 39610981 NT5C3B rs1455534 0.209…
rs1527400 0.9029219 2 178522011 TTC30A rs1527402 0.8555581 2 178513894 TTC30A rs1527405 0.5472684 2 178525827 TTC30A rs1527408 0.5472208 2 178525389 TTC30A rs1527410 0.8927594 2 178525020 TTC30A rs1527990 0.1375973 12 70575477 CNOT2 rs1527991 0.1376696 12 70575708 CNOT2 rs1529928 0.5921628 16 56847270 NUP93 rs1529929 0.5281441 16 56849496 NUP93 rs1529930 0.83302 16 56890900 NUP93 rs1529933 0.5086…
rs1553933 0.7626687 2 60509080 BCL11A rs1554011 0.2418496 2 177551886 TTC30A rs1555985 0.813895 10 14682480 FAM107B rs1556121 0.6701919 13 21210915 IL17D rs1556876 0.219397 20 47716451 ARFGEF2 rs1558037 0.331741 7 108061369 PNPLA8 rs1558359 0.3994564 17 64208396 PRKCA rs1558474 0.3683007 2 210739353 KANSL1L rs1558917 0.5923327 7 130028723 CPA4 rs1558918 0.9459261 7 130029507 CPA4 rs1560884 0.3875…
rs1599823 0.8159126 16 56675817 MT1A rs1604122 0.8244023 16 56663300 MT1A rs1606481 0.0877117 3 99427552 FILIP1L rs1610214 0.8415352 16 56675888 MT1A rs1610265 0.2686328 3 99420192 FILIP1L rs1610509 0.9574123 3 99474327 FILIP1L rs1612859 0.05262743 11 74887040 XRRA1 rs1613416 0.03251606 17 17133121 FLCN rs1613767 0.5600677 1 17675889 PADI4 rs1621005 0.6461449 1 17662751 PADI4 rs1624102 0.544272 1…
rs1644004 0.183196 5 78359036 JMY rs1646119 0.41685 16 29150785 NFATC2IP rs1656764 0.9758204 18 49050898 ME2 rs166379 0.9992869 2 180868838 CWC22 rs1664433 0.7272566 15 57715059 CGNL1 rs1664462 0.2026815 15 57677266 CGNL1 rs1664465 0.08352432 15 57674738 CGNL1 rs1666567 0.04043918 15 57827111 CGNL1 rs1672123 0.7760732 21 44465511 PKNOX1 rs1672124 0.748771 21 44465348 PKNOX1 rs1672126 0.7439159 21…
rs16865446 0.6704163 2 178479149 TTC30A rs16865448 0.2889121 2 178480532 TTC30A rs16865449 0.2770119 2 178480772 TTC30A rs16865452 0.2632429 2 178484469 TTC30A rs16865453 0.2581289 2 178484999 TTC30A rs16865475 0.2428648 2 178489902 TTC30A rs16865492 0.3767339 2 178509820 TTC30A rs16865501 0.4912188 2 178511460 TTC30A rs16865508 0.2515243 2 178512407 TTC30A rs16865509 0.4939314 2 178512943 TTC30A…
rs16957144 0.08742325 16 67099724 CARMIL2 rs16958984 0.9503371 17 64233229 PRKCA rs16958990 0.05916084 17 64236393 PRKCA rs16959000 0.976512 17 64240013 PRKCA rs16959037 0.4501356 17 64280416 PRKCA rs16959096 0.1758469 17 64378019 PRKCA rs16959125 0.1649941 17 64385454 PRKCA rs16959160 0.1671925 17 64391764 PRKCA rs16959178 0.214634 17 64398401 PRKCA rs16959206 0.1676538 17 64404862 PRKCA rs16959…
rs16977567 0.01645771 15 57810093 CGNL1 rs16977585 0.4316715 15 57831407 CGNL1 rs16979708 0.1273387 19 14580113 PKN1 rs16980800 0.01945207 19 15845047 UCA1 rs16980806 0.01705342 19 15848732 UCA1 rs16980824 0.01701044 19 15853150 UCA1 rs16991095 0.8458624 19 2310756 LSM7 rs16994382 0.623197 20 47700764 ARFGEF2 rs17001757 0.1158314 19 12188630 ZNF844 rs17001758 0.1197319 19 12191233 ZNF844 rs170234…
rs17128077 0.01166885 14 55386034 GCH1 rs17128120 0.01510081 14 55474598 GCH1 rs17129431 0.3354803 14 94497896 IFI27L1 rs17129447 0.540604 14 94531697 IFI27L1 rs17129464 0.2555975 14 94560143 IFI27L1 rs17129789 0.5933151 1 67790598 IL12RB2 rs17133461 0.55459 11 74499824 XRRA1 rs17134769 0.01623613 7 108111356 PNPLA8 rs17135705 0.4228634 16 277124 HBQ1 rs17149161 0.6342243 7 75978229 YWHAG rs17149…
rs17211421 0.6461593 2 207386623 ADAM23 rs17211582 0.9158851 2 207393778 ADAM23 rs17211709 0.9025643 2 207395892 ADAM23 rs17211712 0.3325717 14 21454062 METTL17 rs17212185 0.5394611 2 207418650 ADAM23 rs17212861 0.2848798 2 207590573 ADAM23 rs17222948 0.1151933 2 207063142 ADAM23 rs17223039 0.1068025 2 207067179 ADAM23 rs17225638 0.4301827 12 70194435 CNOT2 rs17225645 0.4304754 12 70194668 CNOT2 …
rs17338680 0.7692397 3 99614626 FILIP1L rs1736200 0.01133285 17 17155873 FLCN rs1736202 0.03140839 17 17151938 FLCN rs1736204 0.009296784 17 17151141 FLCN rs1736205 0.009333482 17 17147065 FLCN rs1736208 0.001365026 17 17140683 FLCN rs1736209 0.005059417 17 17140485 FLCN rs1736211 0.001352983 17 17135422 FLCN rs1736212 0.0050656 17 17135008 FLCN rs1736214 0.03248419 17 17132333 FLCN rs1736216 0.0…
rs17529882 0.2284166 7 40795112 MPLKIP rs17556570 0.6147782 1 223878700 CAPN2 rs17557288 0.9464925 1 223904323 CAPN2 rs17557525 0.5024157 1 223907298 CAPN2 rs17557623 0.5160741 1 223909264 CAPN2 rs17585530 0.1102216 1 76134990 RABGGTB rs17591972 0.8229364 17 40399444 NT5C3B rs17595746 0.1608232 18 12707858 SPIRE1 rs176060 0.8021251 16 56583581 MT1A rs17611018 0.5181139 13 100247308 CLYBL rs176113…
rs17720904 0.02254754 17 17002445 FLCN rs17726673 0.07984823 17 17227966 FLCN rs17726703 0.08694689 17 17228533 FLCN rs17730834 0.8652042 2 207524861 ADAM23 rs17732497 0.9439782 7 50336073 IKZF1 rs17739 0.9695545 1 223967953 CAPN2 rs17741796 0.9527258 18 29409319 TRAPPC8 rs17742014 0.9804263 18 29474800 TRAPPC8 rs17743329 0.8344844 18 48380830 ME2 rs17743347 0.8046396 18 48383093 ME2 rs17743658 0…
rs17801498 0.6876796 16 53513452 AKTIP rs17801966 0.4222517 16 53533801 AKTIP rs17802269 0.8588001 16 53550142 AKTIP rs17802341 0.6413257 16 53552206 AKTIP rs17804129 0.9694043 18 29466648 TRAPPC8 rs17804843 0.8308336 17 17962351 FLCN rs17810684 0.9328502 13 28118270 POLR1D rs17811426 0.419935 18 48588407 ME2 rs17811534 0.3830913 18 48655856 ME2 rs17811793 0.868176 13 28164859 POLR1D rs17813659 0…
rs1796813 0.3255663 1 76400403 RABGGTB rs1796815 0.3271889 1 76396793 RABGGTB rs1796827 0.3273865 1 76391536 RABGGTB rs1799135 0.8058426 7 76210741 YWHAG rs1799139 0.825655 7 76219946 YWHAG rs1799210 0.8499982 7 76240529 YWHAG rs1799778 0.2501013 19 44059141 XRCC1 rs1799892 0.7364638 16 3707409 CLUAP1 rs1807019 0.4381667 18 48378106 ME2 rs180743 0.1504904 16 28507644 NFATC2IP rs1808332 0.2766446 …
rs1861353 0.5561011 16 53452081 AKTIP rs1861437 0.05535805 2 207124756 ADAM23 rs1862087 0.5271244 2 207625567 ADAM23 rs1862878 0.1669153 7 139019914 FMC1 rs1862879 0.1292525 7 139019951 FMC1 rs1863495 0.7849833 15 72965611 PARP6 rs1864532 0.1392023 18 12569486 SPIRE1 rs1865149 0.6455212 3 136595610 SLC35G2 rs1865173 0.3085761 12 70712640 CNOT2 rs1865832 0.8311644 16 56884665 NUP93 rs1865833 0.855…
rs1889047 0.1119244 9 139578880 AGPAT2 rs1889697 0.8154212 1 42871005 RIMKLA rs1889774 0.6925745 14 21440463 METTL17 rs1890120 0.2322354 1 224026137 CAPN2 rs1890741 0.705339 1 67782752 IL12RB2 rs1891154 0.6012212 20 34617129 UQCC1 rs1892077 0.9765037 1 223895116 CAPN2 rs1892771 0.1162121 11 58066723 CTNND1 rs1893193 0.7032768 18 12574244 SPIRE1 rs1893212 0.06382118 18 12736491 SPIRE1 rs1893213 0.…
rs1944936 0.441753 11 74419163 XRRA1 rs1944937 0.4415742 11 74419357 XRRA1 rs1947219 0.3011494 15 73186518 PARP6 rs1950344 0.3441405 14 94550300 IFI27L1 rs1950351 0.8669925 14 94457047 IFI27L1 rs1950646 0.7332107 14 94722497 IFI27L1 rs1950840 0.5527685 14 94588270 IFI27L1 rs1950843 0.8191955 14 94597126 IFI27L1 rs1950902 0.8961857 14 64882380 ESR2 rs1951119 0.960974 14 23388326 HAUS4 rs1951202 0.…
rs1990790 0.8690777 7 130033630 CPA4 rs1991442 0.063664 3 130968181 NUDT16P1 rs1991537 0.6906632 2 207472573 ADAM23 rs1994888 0.02162442 15 57810972 CGNL1 rs1994889 0.03877072 15 57811050 CGNL1 rs1995147 0.5096436 1 67803059 IL12RB2 rs1995990 0.3112486 15 57814888 CGNL1 rs1997206 0.9807755 2 178535306 TTC30A rs1997207 0.6304887 2 178506438 TTC30A rs1997208 0.855356 2 178512318 TTC30A rs1997209 0.…
rs2029859 0.780738 1 67854942 IL12RB2 rs2030404 0.9835913 19 44043448 XRCC1 rs2030922 0.8336657 7 73141464 ABHD11 rs2031029 0.6451756 3 136599814 SLC35G2 rs2033323 0.4555875 18 12511324 SPIRE1 rs2033532 0.8011833 11 74551025 XRRA1 rs2034078 0.9507368 13 21397257 IL17D rs2038687 0.8630906 20 60707040 LSM14B rs2040103 0.466137 1 223901742 CAPN2 rs2040561 0.6238775 19 19248080 TMEM161A rs2040562 0.6…
rs2057521 0.5574292 13 28116559 POLR1D rs2057522 0.5534035 13 28116998 POLR1D rs2058550 0.7976564 2 60519588 BCL11A rs2059304 0.796668 2 207367521 ADAM23 rs2060403 0.9063174 2 110329222 SOWAHC rs2062115 0.674516 17 33498642 NLE1 rs2064724 0.5508692 20 34522520 UQCC1 rs2064853 0.2929072 20 47675176 ARFGEF2 rs2068155 0.02380344 12 70341114 CNOT2 rs2068777 0.3288783 2 113696126 IL1B rs2070106 0.7014…
rs2108296 0.2212564 7 24595590 DFNA5 rs2108298 0.4099472 7 24717951 DFNA5 rs2108301 0.3145457 7 24660345 DFNA5 rs2108430 0.956411 16 3738078 CLUAP1 rs2109970 0.3654376 2 210742253 KANSL1L rs2110398 0.8828345 2 60500484 BCL11A rs2110399 0.804492 2 60516388 BCL11A rs2110400 0.8408334 2 60516495 BCL11A rs2110401 0.7985698 2 60521970 BCL11A rs2110402 0.8354977 2 60522038 BCL11A rs2110403 0.8846552 2 …
rs2155795 0.001845711 12 47985524 SLC48A1 rs2156010 0.417363 18 48537489 ME2 rs2156638 0.504347 11 57542998 CTNND1 rs2158443 0.1581536 16 3685782 CLUAP1 rs2158849 0.4005683 7 108038318 PNPLA8 rs2158889 0.6840673 7 24596097 DFNA5 rs2158962 0.5865559 16 3738027 CLUAP1 rs2159556 0.8755062 17 64158655 PRKCA rs2159747 0.3524291 2 210718897 KANSL1L rs2160020 0.9311072 2 211001813 KANSL1L rs2160067 0.79…
rs2183246 0.4677497 13 114901188 RASA3 rs2186006 0.9918492 1 223901545 CAPN2 rs2186406 0.1193708 11 58115749 CTNND1 rs2186906 0.1902926 18 12572195 SPIRE1 rs2186907 0.1551618 18 12590885 SPIRE1 rs2187435 0.6388325 11 74857789 XRRA1 rs2188880 0.4714269 7 24795757 DFNA5 rs2189784 0.7238427 19 15959200 UCA1 rs2190435 0.7201848 7 24561192 DFNA5 rs2190436 0.965041 7 24561060 DFNA5 rs2190437 0.3562989 …
rs2230538 0.6262152 19 14574959 PKN1 rs2232704 0.8296475 14 94756119 IFI27L1 rs2233752 0.6120832 14 58755480 ARID4A rs2234632 0.8282447 14 21467913 METTL17 rs2236159 0.6819047 20 34102189 UQCC1 rs2236160 0.6805153 20 34101821 UQCC1 rs2236161 0.678187 20 34101631 UQCC1 rs2236164 0.6451811 20 34097353 UQCC1 rs2236165 0.6451811 20 34096725 UQCC1 rs2236270 0.2724261 20 33523155 UQCC1 rs2236918 0.9022…
rs2242350 0.7770702 5 68513599 CENPH rs2242351 0.8266667 5 68513572 CENPH rs224320 0.09917497 20 34010556 UQCC1 rs224329 0.3206772 20 34019579 UQCC1 rs224333 0.3008476 20 34023962 UQCC1 rs224334 0.2639209 20 34024719 UQCC1 rs224343 0.2752919 20 34036699 UQCC1 rs224351 0.4109609 20 34052273 UQCC1 rs224354 0.4146715 20 34054609 UQCC1 rs224360 0.4418043 20 34059675 UQCC1 rs224362 0.4521824 20 340626…
rs2269183 0.8212838 2 207355354 ADAM23 rs2269806 0.4072894 19 19145193 TMEM161A rs2269812 0.5421681 7 24746022 DFNA5 rs2269869 0.616091 19 19109545 TMEM161A rs2270180 0.9380238 17 17185102 FLCN rs2270494 0.9958571 16 3490922 CLUAP1 rs2270614 0.780605 1 67856021 IL12RB2 rs2270836 0.7051671 16 56667614 MT1A rs2270838 0.6795547 16 69959223 COG4 rs2270841 0.1975574 16 69967897 COG4 rs2270842 0.190348…
rs2285690 0.8443409 7 24902762 DFNA5 rs2285691 0.8523617 7 24903107 DFNA5 rs2285813 0.314617 16 3566102 CLUAP1 rs2285851 0.3784313 19 19126913 TMEM161A rs2285881 0.0004811647 19 15934599 UCA1 rs2285882 0.7320132 19 15934830 UCA1 rs2286259 0.977568 7 108214932 PNPLA8 rs2287602 0.0283315 2 211427241 KANSL1L rs2287700 0.6318909 19 14578674 PKN1 rs2288257 0.8510728 15 72543021 PARP6 rs2288259 0.26948…
rs2295207 0.9367976 20 60740887 LSM14B rs2295216 0.4454353 14 94505283 IFI27L1 rs2295217 0.3063205 14 94568776 IFI27L1 rs2295355 0.363368 20 34252654 UQCC1 rs2295578 0.3334252 20 47626601 ARFGEF2 rs2295579 0.3333913 20 47626736 ARFGEF2 rs2295580 0.3334422 20 47626847 ARFGEF2 rs2295680 0.9639521 14 23374435 HAUS4 rs2295682 0.9678709 14 23374862 HAUS4 rs2295683 0.9619781 14 23388382 HAUS4 rs2295685…
rs2305668 0.6345597 15 75142761 FAM219B rs2306489 0.06170589 15 72227471 PARP6 rs2306508 0.03070659 17 33454415 NLE1 rs2306576 0.0588342 15 72170686 PARP6 rs2306577 0.9304132 15 72119636 PARP6 rs2306578 0.9114169 15 72142619 PARP6 rs2314233 0.6819632 13 21197221 IL17D rs2314723 0.8683871 13 21516842 IL17D rs2316263 0.98565 3 99900096 FILIP1L rs231976 0.9415956 16 28545587 NFATC2IP rs2331896 0.001…
rs2363128 0.752911 17 64821410 PRKCA rs2364594 0.1732165 5 78453899 JMY rs2365620 0.9898939 2 178531255 TTC30A rs2367990 0.5268207 2 180843126 CWC22 rs2368128 0.3095353 2 180996189 CWC22 rs237711 0.2556044 20 47926856 ARFGEF2 rs237732 0.2641767 20 47941438 ARFGEF2 rs237743 0.2572582 20 47903019 ARFGEF2 rs2380137 0.5142022 20 60681037 LSM14B rs2380178 0.8684889 19 4288184 STAP2 rs238150 0.2695402 …
rs2419903 0.7914668 2 60528052 BCL11A rs242249 0.5631101 17 17257846 FLCN rs242251 0.722183 17 17259877 FLCN rs2425019 0.3500776 20 33819415 UQCC1 rs2425043 0.469147 20 33868702 UQCC1 rs2425047 0.4751324 20 33871675 UQCC1 rs2425049 0.3408579 20 33874720 UQCC1 rs2425050 0.5282896 20 33879478 UQCC1 rs2425056 0.6213243 20 33909245 UQCC1 rs2425060 0.6558347 20 33914701 UQCC1 rs2425062 0.3412785 20 33…
rs2452320 0.5634653 3 99645216 FILIP1L rs2464091 0.5470243 2 26844925 KCNK3 rs2465291 0.1391646 11 74827790 XRRA1 rs2466446 0.9002799 2 113623280 IL1B rs2466452 0.6256181 2 113622825 IL1B rs2470890 0.4981813 15 75047426 FAM219B rs2472299 0.9270674 15 75033400 FAM219B rs2472300 0.9251879 15 75033909 FAM219B rs2472304 0.4996821 15 75044238 FAM219B rs2472689 0.002707614 17 17160614 FLCN rs2477137 0.…
rs2521763 0.7003912 7 24770653 DFNA5 rs2521768 0.2546984 7 24784403 DFNA5 rs2521770 0.144276 7 24789082 DFNA5 rs2521772 0.3289748 7 24799496 DFNA5 rs252321 0.5034867 16 29199058 NFATC2IP rs252345 0.3544179 16 29184698 NFATC2IP rs252355 0.5613214 16 29180407 NFATC2IP rs252491 0.4392944 16 29158794 NFATC2IP rs252496 0.4530274 16 29159435 NFATC2IP rs2525448 0.007135371 12 47985899 SLC48A1 rs2526697 …
rs2585897 0.6116844 13 21398979 IL17D rs2585898 0.811285 13 21400301 IL17D rs2585901 0.8483379 13 21420271 IL17D rs2585902 0.8484735 13 21417636 IL17D rs2586752 0.3908002 18 48375668 ME2 rs2586753 0.3913677 18 48375760 ME2 rs2586759 0.411461 18 48379064 ME2 rs2586760 0.2484343 18 48363133 ME2 rs2586761 0.328553 18 48366458 ME2 rs2586765 0.7252786 18 48369584 ME2 rs2586885 0.8289584 2 26889576 KCN…
rs2650492 0.2845231 16 28333411 NFATC2IP rs2650494 0.07779341 16 28318440 NFATC2IP rs2665558 0.2651342 18 48402338 ME2 rs2665561 0.2147106 18 48409695 ME2 rs2665564 0.3924994 18 48383125 ME2 rs2665566 0.4105022 18 48382814 ME2 rs2665567 0.4067951 18 48382805 ME2 rs2665570 0.1814546 18 48465028 ME2 rs2665572 0.2704814 18 48397801 ME2 rs2672657 0.689833 2 180872820 CWC22 rs2672658 0.8091018 2 18087…
rs2708932 0.9052242 2 113690675 IL1B rs2711091 0.6870119 7 24622086 DFNA5 rs2711093 0.6868514 7 24617290 DFNA5 rs2711094 0.284355 7 24614960 DFNA5 rs2711095 0.9950642 7 24578963 DFNA5 rs2711097 0.4183037 7 24569933 DFNA5 rs2711100 0.9730116 7 24568120 DFNA5 rs2711104 0.9716425 7 24562279 DFNA5 rs2711105 0.7693216 7 24561567 DFNA5 rs2711106 0.7709449 7 24560690 DFNA5 rs2711107 0.3655725 7 24558530…
rs2721781 0.4579885 7 24725834 DFNA5 rs2721782 0.7411198 7 24720822 DFNA5 rs2721785 0.5504243 7 24670739 DFNA5 rs2721789 0.4493815 7 24673252 DFNA5 rs2721794 0.2117434 7 24766507 DFNA5 rs2721795 0.4228391 7 24766614 DFNA5 rs2721798 0.2706856 7 24769400 DFNA5 rs2721800 0.5292525 7 24692552 DFNA5 rs2721801 0.2796391 7 24784057 DFNA5 rs2721802 0.5273501 7 24697743 DFNA5 rs2721803 0.3801629 7 2478153…
rs2763002 0.6116844 13 21369982 IL17D rs2763928 0.6019663 13 100246138 CLYBL rs2763948 0.9644846 13 100277143 CLYBL rs2768701 0.9511678 10 14777876 FAM107B rs2771324 0.3177667 14 21433133 METTL17 rs2771327 0.4509766 14 21434371 METTL17 rs2771334 0.7914034 14 21452603 METTL17 rs2771335 0.7930024 14 21453373 METTL17 rs2771338 0.3317133 14 21455159 METTL17 rs2771339 0.3780913 14 21455187 METTL17 rs2…
rs2847434 0.007110161 12 47987647 SLC48A1 rs2847566 0.4347283 18 48383016 ME2 rs2847569 0.3909051 18 48375344 ME2 rs2847570 0.3902386 18 48373800 ME2 rs2847577 0.3243829 18 48364819 ME2 rs2847579 0.2743239 18 48362664 ME2 rs2849243 0.2939509 18 48367293 ME2 rs2849729 0.4317391 21 44489113 PKNOX1 rs2850542 0.2858146 18 48403560 ME2 rs2850543 0.1943378 18 48425251 ME2 rs2850544 0.1954238 18 4842289…
rs2878168 0.3309016 14 55320785 GCH1 rs2878172 0.004438607 14 55373670 GCH1 rs2878174 0.01316804 14 55470624 GCH1 rs2878342 0.9167889 19 50017724 FCGRT rs2883772 0.09960345 7 139072756 FMC1 rs2884768 0.6998152 2 207477323 ADAM23 rs2889855 0.3493505 20 33276853 UQCC1 rs2896254 0.829344 14 94508546 IFI27L1 rs2899774 0.3044195 15 72206808 PARP6 rs2901000 0.8823814 2 60501216 BCL11A rs2904880 0.38666…
rs2956981 0.1610804 11 57501182 CTNND1 rs2957369 0.3043202 15 72315407 PARP6 rs2957724 0.06420126 15 72248474 PARP6 rs2957729 0.1908278 15 72218207 PARP6 rs2957734 0.06493541 15 72261385 PARP6 rs2957742 0.06787225 15 72302894 PARP6 rs2957745 0.06508183 15 72288077 PARP6 rs2957747 0.3044195 15 72280433 PARP6 rs2957749 0.3043202 15 72333608 PARP6 rs2957750 0.06401383 15 72332258 PARP6 rs2972357 0.9…
rs3003419 0.59239 1 17573988 PADI4 rs3003434 0.6860813 1 17602191 PADI4 rs3003438 0.1292302 1 17606560 PADI4 rs3003440 0.8119101 1 17608680 PADI4 rs3017889 0.1795316 11 57520849 CTNND1 rs3018832 0.7190356 11 74812973 XRRA1 rs3020443 0.9819934 14 64792340 ESR2 rs3020444 0.4132592 14 64791013 ESR2 rs3020445 0.9713343 14 64788644 ESR2 rs3020450 0.3672403 14 64768302 ESR2 rs3021 0.2579786 20 47874005…
rs3213356 0.8988509 19 44058239 XRCC1 rs3213866 0.5500144 2 110343070 SOWAHC rs3403 0.5698814 21 44450938 PKNOX1 rs348276 0.2822683 20 47786190 ARFGEF2 rs350092 0.9154982 5 68502853 CENPH rs350106 0.7587193 5 68492746 CENPH rs350107 0.7586759 5 68492581 CENPH rs350120 0.7898373 5 68476581 CENPH rs351424 0.9969564 5 68457386 CENPH rs352626 0.7549336 5 68462203 CENPH rs353698 0.58827 19 4240948 STA…
rs3744135 0.2168859 17 17050542 FLCN rs3744136 0.4437709 17 17047257 FLCN rs3744137 0.01776109 17 17046024 FLCN rs3744138 0.01772703 17 17045861 FLCN rs3744139 0.0003827674 17 17045733 FLCN rs3744142 0.09017244 17 17104303 FLCN rs3744317 0.5006313 17 64216644 PRKCA rs3744779 0.6615673 17 40025453 NT5C3B rs3744781 0.5204166 17 39982151 NT5C3B rs3744782 0.5792735 17 40010979 NT5C3B rs3745473 0.6917…
rs3759664 0.137666 14 55371579 GCH1 rs3759817 0.7258329 15 72299900 PARP6 rs3759820 0.06763773 15 72300031 PARP6 rs3759901 0.8593735 15 72511415 PARP6 rs3760083 0.9934309 16 3450052 CLUAP1 rs3760292 0.5585034 17 64226140 PRKCA rs3760524 0.1774383 17 39599926 NT5C3B rs3760707 0.69577 19 50084454 FCGRT rs3761013 0.0004796165 19 15933059 UCA1 rs3761082 0.8062328 19 19249727 TMEM161A rs3761379 0.5196…
rs37823 0.5872052 16 3485460 CLUAP1 rs37824 0.5853284 16 3486236 CLUAP1 rs37825 0.5573822 16 3487576 CLUAP1 rs3782908 0.9783681 12 48169526 SLC48A1 rs37834 0.8045623 16 3501604 CLUAP1 rs3783637 0.3147314 14 55348118 GCH1 rs3783638 0.3138696 14 55348373 GCH1 rs3783642 0.00643503 14 55360203 GCH1 rs3783646 0.09275344 14 55471887 GCH1 rs3783731 0.2927156 14 64861387 ESR2 rs3783736 0.6005502 14 64751…
rs3794699 0.7932232 16 3718728 CLUAP1 rs3794701 0.9251126 16 3730578 CLUAP1 rs3794702 0.5636496 16 3730613 CLUAP1 rs3795039 0.2646935 19 2329603 LSM7 rs3795078 0.7887622 20 47777030 ARFGEF2 rs3795082 0.3011095 20 47673002 ARFGEF2 rs3795159 0.3343614 20 33896262 UQCC1 rs3795213 0.4656391 1 17675197 PADI4 rs3795214 0.6046482 1 17659813 PADI4 rs3795745 0.3724486 1 16557390 ARHGEF19 rs3797091 0.62046…
rs3816122 0.71699 17 40058212 NT5C3B rs381691 0.6934633 21 44458689 PKNOX1 rs3816916 0.5920565 16 3493240 CLUAP1 rs3817 0.2551697 19 44090195 XRCC1 rs3818116 0.9315279 14 94503440 IFI27L1 rs3818118 0.9698938 14 94566967 IFI27L1 rs3818224 0.3334422 20 47628170 ARFGEF2 rs3818225 0.623197 20 47686983 ARFGEF2 rs3818253 0.3185802 20 33596876 UQCC1 rs3818261 0.787803 20 47736312 ARFGEF2 rs3818273 0.284…
rs3845698 0.8527676 2 180807307 CWC22 rs3845699 0.624507 2 180807468 CWC22 rs3845700 0.9945664 2 180825163 CWC22 rs3845701 0.5082316 2 180826781 CWC22 rs3845702 0.3497839 2 180848488 CWC22 rs3845703 0.9415509 2 180853842 CWC22 rs3845705 0.2141432 2 180863067 CWC22 rs3845800 0.6654314 2 203734365 WDR12 rs3845808 0.8101928 2 207512319 ADAM23 rs3845925 0.6679516 3 136662062 SLC35G2 rs3847358 0.33436…
rs3911901 0.7269324 13 21517936 IL17D rs3912257 0.4160877 2 180855863 CWC22 rs3912258 0.9147508 2 180848984 CWC22 rs3914458 0.3333757 2 180862606 CWC22 rs3915546 0.5590531 14 64617958 ESR2 rs3917365 0.3765665 2 113586469 IL1B rs3917368 0.7633076 2 113582782 IL1B rs3921767 0.3016696 3 99602555 FILIP1L rs392225 0.744868 21 44463996 PKNOX1 rs3922328 0.7062357 7 24557667 DFNA5 rs3922668 0.8305673 16 …
rs4073940 0.6814957 17 16977810 FLCN rs4074317 0.2340607 13 114747187 RASA3 rs4074612 0.4017082 17 16978522 FLCN rs4074669 0.04165665 10 15221174 FAM107B rs4074819 0.4423759 17 17027255 FLCN rs4074918 0.8312509 3 99748950 FILIP1L rs4075038 0.4440214 3 99680086 FILIP1L rs4076146 0.5999276 15 73269173 PARP6 rs4077460 0.9078892 5 68572668 CENPH rs4077889 0.2503591 7 139033914 FMC1 rs4078062 0.110857…
rs411441 0.7784759 21 44466099 PKNOX1 rs4123360 0.9987069 2 180827546 CWC22 rs412592 0.8954802 21 44462129 PKNOX1 rs4127350 0.08836818 11 58099478 CTNND1 rs412810 0.7419355 21 44462206 PKNOX1 rs4128340 0.1279403 4 88908136 HSD17B11 rs4131376 0.9753894 7 73188318 ABHD11 rs4134363 0.3172601 4 88162837 HSD17B11 rs4141251 0.9369499 7 24924015 DFNA5 rs4144276 0.565869 2 178523420 TTC30A rs4144278 0.96…
rs4260029 0.5215222 15 73245874 PARP6 rs4260106 0.6444254 17 40107809 NT5C3B rs4261301 0.07072335 11 58114984 CTNND1 rs4266362 0.8738703 5 68589847 CENPH rs4267379 0.003637184 17 16926566 FLCN rs427115 0.1258222 19 44098197 XRCC1 rs4272798 0.2735731 11 57743634 CTNND1 rs4273187 0.923137 2 180850910 CWC22 rs4274405 0.03651503 15 73313691 PARP6 rs4275786 0.0003483876 14 94565478 IFI27L1 rs4275914 8…
rs4364030 0.9442074 2 113664409 IL1B rs4364226 0.6735746 4 88386538 HSD17B11 rs4365213 0.1139543 14 64720264 ESR2 rs4366688 0.5997328 15 73272784 PARP6 rs4366742 0.4854155 17 64212242 PRKCA rs4368156 0.8412668 16 56874272 NUP93 rs4368250 0.4231223 18 48539115 ME2 rs4369516 0.4936825 13 100100700 CLYBL rs4371151 0.06394907 16 56808612 NUP93 rs4374145 0.6718814 15 73273874 PARP6 rs4375700 0.0188307…
rs4453368 0.3707794 14 21436124 METTL17 rs4456280 0.4532107 11 74781124 XRRA1 rs4456561 0.608832 17 4224840 UBE2G1 rs4458050 0.7166421 17 40051722 NT5C3B rs4458741 0.3268164 7 73245179 ABHD11 rs4461062 0.5406534 16 56864618 NUP93 rs4463750 0.3940202 10 14686790 FAM107B rs4470090 0.0003495556 14 94565515 IFI27L1 rs4470372 0.6832105 2 178505857 TTC30A rs4478268 0.8362319 5 68611964 CENPH rs4479633 …
rs4566245 0.2702002 18 12445632 SPIRE1 rs4569189 0.5231602 14 94696688 IFI27L1 rs4571265 0.4510033 3 99705111 FILIP1L rs4575500 0.5211872 15 73245479 PARP6 rs4577128 0.4286499 17 64308473 PRKCA rs4577503 0.9260472 3 99657922 FILIP1L rs4578649 0.7223642 16 3407258 CLUAP1 rs4583723 0.734975 4 88161312 HSD17B11 rs4586362 0.0003425755 14 94565442 IFI27L1 rs4586785 0.4022164 3 141551574 RNF7 rs4588340…
rs4665880 0.2025646 2 26781247 KCNK3 rs4665906 0.323395 2 27000276 KCNK3 rs4665919 0.448778 2 27115304 KCNK3 rs4671379 0.905482 2 60495038 BCL11A rs4671380 0.9835521 2 60496807 BCL11A rs4671381 0.8912032 2 60496910 BCL11A rs4671386 0.8747282 2 60514993 BCL11A rs4672373 0.8826099 2 60491602 BCL11A rs4672381 0.8751155 2 60514946 BCL11A rs4672384 0.8011798 2 60527394 BCL11A rs4672385 0.7976669 2 605…
rs4728195 0.5152825 7 130034437 CPA4 rs4728464 0.3198871 7 139017670 FMC1 rs4728466 0.1003899 7 139096365 FMC1 rs4728467 0.1118852 7 139120562 FMC1 rs4728710 0.9113529 7 76012666 YWHAG rs4731675 0.9382201 7 129973093 CPA4 rs4731679 0.8884051 7 129978749 CPA4 rs4731689 0.8240378 7 130009839 CPA4 rs4731690 0.5607741 7 130017940 CPA4 rs4732366 0.208573 7 139027845 FMC1 rs4732369 0.09870371 7 1390691…
rs4774956 0.5982017 15 57821410 CGNL1 rs4774958 0.4844745 15 57828751 CGNL1 rs4774959 0.3082214 15 57833528 CGNL1 rs4776583 0.3044195 15 72213167 PARP6 rs4776618 0.3031091 15 73177909 PARP6 rs4777472 0.3044195 15 72208313 PARP6 rs4777569 0.5348417 15 73232771 PARP6 rs4777580 0.0983132 15 73319687 PARP6 rs4777581 0.09842486 15 73320015 PARP6 rs4783954 0.8166366 16 56742360 NUP93 rs4783956 0.630862…
rs4791060 0.2662789 17 64438691 PRKCA rs4791072 0.1527227 17 64310496 PRKCA rs4791075 0.1488807 17 64238065 PRKCA rs4791078 0.436303 17 64210014 PRKCA rs4791079 0.4806515 17 64209540 PRKCA rs4791083 0.878729 17 64169795 PRKCA rs4791084 0.4101844 17 64169087 PRKCA rs4793039 0.7840039 17 40760234 NT5C3B rs4796615 0.1351774 17 40004910 NT5C3B rs4796616 0.1360381 17 40005173 NT5C3B rs4796618 0.189849…
rs4803646 0.4418735 19 44133648 XRCC1 rs4803648 0.6073706 19 44145543 XRCC1 rs480400 0.9406307 16 28574615 NFATC2IP rs4806980 0.4167947 19 4347169 STAP2 rs4807223 0.6268912 19 2313800 LSM7 rs4807227 0.3645731 19 2318180 LSM7 rs4807556 0.2506397 19 4257102 STAP2 rs4807563 0.1957586 19 4268341 STAP2 rs4807564 0.2047048 19 4268402 STAP2 rs4807565 0.19404 19 4268543 STAP2 rs4807572 0.6377465 19 42864…
rs486498 0.3871121 18 12481489 SPIRE1 rs486529 0.6763483 13 21513548 IL17D rs486582 0.3621337 2 27104131 KCNK3 rs487139 0.553166 18 12415885 SPIRE1 rs487226 0.2446239 11 74687341 XRRA1 rs487561 0.01747254 9 135957117 CEL rs487666 0.7591635 11 74530032 XRRA1 rs4880127 0.06533842 9 139590934 AGPAT2 rs488115 0.6634305 11 74731890 XRRA1 rs4883641 0.7593989 13 114792330 RASA3 rs4883643 0.7278891 13 11…
rs4905154 0.5452432 14 94542118 IFI27L1 rs4905157 0.7247078 14 94554363 IFI27L1 rs4905161 0.2582252 14 94560931 IFI27L1 rs4905164 0.3085234 14 94589104 IFI27L1 rs4905166 0.881424 14 94598617 IFI27L1 rs4905168 0.7062206 14 94603842 IFI27L1 rs4911163 0.2906404 20 33470694 UQCC1 rs4911178 0.4222868 20 33952620 UQCC1 rs4911179 0.4291917 20 33972899 UQCC1 rs4911180 0.4283948 20 33972948 UQCC1 rs491145…
rs4939192 0.1423677 11 57997608 CTNND1 rs4939204 0.08832733 11 58081152 CTNND1 rs4939648 0.3079945 18 48495481 ME2 rs4939650 0.4359384 18 48553225 ME2 rs4939652 0.4215824 18 48649082 ME2 rs4940032 0.2483126 18 48491429 ME2 rs4940044 0.2052928 18 48676244 ME2 rs494394 0.4053688 16 3281891 CLUAP1 rs4944061 0.5580432 11 74480548 XRRA1 rs4944067 0.4721686 11 74778675 XRRA1 rs494474 0.3740191 11 74710…
rs4982704 0.8068528 14 23363537 HAUS4 rs4982709 0.9663874 14 23394699 HAUS4 rs498432 0.1703977 13 28191895 POLR1D rs4985377 0.2990586 16 69948497 COG4 rs4985378 0.2989121 16 69948949 COG4 rs4985392 0.642626 16 70106199 COG4 rs4985405 0.6077485 16 70191118 COG4 rs4985407 0.1665049 16 70285901 COG4 rs4985414 0.1322511 16 70670242 COG4 rs4985452 0.2229251 16 69945141 COG4 rs4985455 0.2988342 16 6994…
rs5012458 0.1802144 11 58025624 CTNND1 rs5014388 0.8339692 16 70057868 COG4 rs5025340 0.6401775 2 178514375 TTC30A rs503307 0.7334641 18 12417905 SPIRE1 rs503699 0.4523357 13 28214734 POLR1D rs503855 0.8712519 11 74533452 XRRA1 rs504970 0.903866 11 74474763 XRRA1 rs506028 0.6905245 11 66468469 PPP1CA rs507217 0.4701575 13 28208517 POLR1D rs507620 0.8781055 11 74496113 XRRA1 rs507868 0.4683994 18 …
rs544891 0.3155753 11 74520336 XRRA1 rs545304 0.9309928 11 74488404 XRRA1 rs546713 0.9642604 18 12413985 SPIRE1 rs548927 0.2438845 16 3257868 CLUAP1 rs549818 0.3132674 18 29479325 TRAPPC8 rs550980 0.6683927 11 74642250 XRRA1 rs554226 0.4634116 13 28222151 POLR1D rs554389 0.5600717 18 12473831 SPIRE1 rs556734 0.9684942 18 12393623 SPIRE1 rs556916 0.9309928 11 74485613 XRRA1 rs557037 0.7740705 11 7…
rs5745430 0.2645074 1 76332994 RABGGTB rs5745434 0.6889972 1 76333173 RABGGTB rs5745438 0.6890696 1 76333426 RABGGTB rs5745523 0.6083099 1 76361041 RABGGTB rs5745543 0.2923036 1 76365111 RABGGTB rs5745545 0.3193233 1 76377356 RABGGTB rs5745546 0.6659063 1 76378038 RABGGTB rs5745547 0.3217579 1 76378275 RABGGTB rs5745549 0.7113755 1 76378502 RABGGTB rs5745553 0.3232202 1 76379135 RABGGTB rs5745554…
rs6012557 0.5225714 20 47531154 ARFGEF2 rs6012558 0.2851279 20 47531286 ARFGEF2 rs6012562 0.3313463 20 47535261 ARFGEF2 rs6012564 0.3226672 20 47541600 ARFGEF2 rs6012568 0.9743467 20 47559264 ARFGEF2 rs6012581 0.3334591 20 47627845 ARFGEF2 rs6012591 0.3011095 20 47667342 ARFGEF2 rs6012617 0.2515761 20 47837126 ARFGEF2 rs6019463 0.3100494 20 47477867 ARFGEF2 rs6019493 0.766735 20 47506616 ARFGEF2 …
rs605902 0.9863504 18 48445498 ME2 rs605954 0.2949514 11 74581213 XRRA1 rs6059851 0.03731755 20 33047945 UQCC1 rs6059866 0.0382956 20 33075810 UQCC1 rs6059867 0.03845468 20 33078103 UQCC1 rs6059875 0.03852625 20 33086090 UQCC1 rs6059896 0.03963518 20 33111783 UQCC1 rs6059932 0.09839486 20 33175466 UQCC1 rs6060266 0.316517 20 33733078 UQCC1 rs6060270 0.5790674 20 33736814 UQCC1 rs6060278 0.3296317…
rs6060703 0.5543269 20 34529906 UQCC1 rs6060710 0.5557428 20 34536055 UQCC1 rs6060717 0.5432537 20 34544647 UQCC1 rs6060719 0.5467616 20 34546013 UQCC1 rs6060720 0.5476222 20 34548336 UQCC1 rs6060723 0.4728114 20 34549947 UQCC1 rs6060729 0.4711396 20 34557004 UQCC1 rs606073 0.2513933 18 48485967 ME2 rs6060739 0.3190314 20 34567592 UQCC1 rs6060741 0.2309987 20 34571484 UQCC1 rs6060744 0.2475331 20…
rs6087709 0.9017424 20 34017944 UQCC1 rs6087720 0.6005969 20 34169284 UQCC1 rs6088502 0.06684405 20 33037644 UQCC1 rs6088512 0.03858168 20 33095891 UQCC1 rs6088520 0.07993552 20 33132364 UQCC1 rs6088552 0.289928 20 33226491 UQCC1 rs6088567 0.4031873 20 33263872 UQCC1 rs6088568 0.3570006 20 33265971 UQCC1 rs6088569 0.4524887 20 33268199 UQCC1 rs6088580 0.1467385 20 33285053 UQCC1 rs6088618 0.16551…
rs6090940 0.3011095 20 47666027 ARFGEF2 rs6095298 0.6228988 20 47413079 ARFGEF2 rs6095314 0.2099775 20 47442003 ARFGEF2 rs6095323 0.2727551 20 47449171 ARFGEF2 rs6095325 0.3006237 20 47453602 ARFGEF2 rs6095329 0.3167154 20 47471825 ARFGEF2 rs6095360 0.4658484 20 47532536 ARFGEF2 rs6095391 0.2298806 20 47618835 ARFGEF2 rs6095395 0.403424 20 47627095 ARFGEF2 rs6095396 0.3063972 20 47627170 ARFGEF2 …
rs6121904 0.8869582 20 60703707 LSM14B rs6121933 0.7732605 20 60740930 LSM14B rs6121939 0.7978797 20 60747573 LSM14B rs6122763 0.3341476 20 47797653 ARFGEF2 rs6125539 0.2935724 20 47703810 ARFGEF2 rs6125551 0.3042581 20 47720386 ARFGEF2 rs6125576 0.33586 20 47776919 ARFGEF2 rs6141548 0.4299838 20 33971085 UQCC1 rs6141601 0.9410302 20 34716048 UQCC1 rs6142210 0.2898926 20 33223012 UQCC1 rs6142358 …
rs633129 0.9732904 11 57685196 CTNND1 rs634035 0.4449816 13 28210009 POLR1D rs636388 0.765524 11 57679524 CTNND1 rs639595 0.4165325 18 29407057 TRAPPC8 rs639768 0.7502399 11 74723556 XRRA1 rs641461 0.6916939 3 99386364 FILIP1L rs6414979 0.1703324 5 78548010 JMY rs641584 0.8569968 11 74654254 XRRA1 rs6416772 0.6020637 16 56819171 NUP93 rs642633 0.1806636 18 48429604 ME2 rs642698 0.1878214 18 48422…
rs6466238 0.3999795 7 108111566 PNPLA8 rs6467294 0.1026357 7 129943127 CPA4 rs6467298 0.815357 7 129970606 CPA4 rs6467303 0.9634583 7 129976468 CPA4 rs6467304 0.4440723 7 129983500 CPA4 rs6467305 0.9285898 7 129984274 CPA4 rs6467306 0.9573184 7 129986521 CPA4 rs6467308 0.3016163 7 130074230 CPA4 rs6467836 0.1527405 7 139023517 FMC1 rs6467840 0.09834689 7 139065401 FMC1 rs6467843 0.09907587 7 1390…
rs6499323 0.03490062 16 70624483 COG4 rs6499850 0.8122549 16 56687638 MT1A rs6499852 0.5992913 16 56818547 NUP93 rs6499853 0.5782737 16 56866801 NUP93 rs6499854 0.8788099 16 56880842 NUP93 rs6500548 0.2303752 16 3710537 CLUAP1 rs6500550 0.7473063 16 3746241 CLUAP1 rs6501171 0.7755042 16 3402610 CLUAP1 rs6501178 0.2929884 16 3566362 CLUAP1 rs650130 0.8663989 11 74578197 XRRA1 rs6502526 0.8287789 1…
rs6508037 0.2488722 18 48360516 ME2 rs6508038 0.2421956 18 48360595 ME2 rs6508039 0.2372504 18 48361252 ME2 rs6509092 0.1813712 19 44022305 XRCC1 rs6509096 0.1796584 19 44034346 XRCC1 rs6509439 0.5342667 19 50105239 FCGRT rs651076 0.947882 5 68450955 CENPH rs6510801 0.1315892 19 4297968 STAP2 rs6511010 0.5354752 19 19135319 TMEM161A rs6511014 0.4838596 19 19164227 TMEM161A rs6511018 0.4313323 19 …
rs6560958 0.7510962 13 114817290 RASA3 rs656112 0.1112948 13 28184128 POLR1D rs6565259 0.1957611 16 28898793 NFATC2IP rs6565300 0.3787346 16 28993049 NFATC2IP rs6571588 0.3448224 14 21438849 METTL17 rs6571594 0.3433716 14 21452223 METTL17 rs657246 0.1010044 12 48013327 SLC48A1 rs6572891 0.8786559 14 23447341 HAUS4 rs6573138 0.5640774 14 57719853 NAA30 rs6573194 0.9625556 14 58712914 ARID4A rs6573…
rs6603785 0.8508416 1 1186502 TNFRSF18 rs6603787 0.3891763 1 1188225 TNFRSF18 rs6603867 0.05370944 1 16474701 ARHGEF19 rs6603883 0.05688223 1 16482976 ARHGEF19 rs6604724 0.9514116 1 223998571 CAPN2 rs6604728 0.8662574 1 224022834 CAPN2 rs661327 0.5921182 18 48479444 ME2 rs662062 0.3060009 11 74574677 XRRA1 rs662299 0.9004904 13 28235955 POLR1D rs662638 0.9720445 11 57686764 CTNND1 rs663945 0.0071…
rs6680821 0.1350899 1 223856884 CAPN2 rs6681243 0.4567871 1 16672840 ARHGEF19 rs668139 0.8997336 5 68489836 CENPH rs6683052 0.4968163 1 223906121 CAPN2 rs6683379 0.6122579 1 223906421 CAPN2 rs6684354 0.8667318 1 42861950 RIMKLA rs6685475 0.5447163 1 223909655 CAPN2 rs6685557 0.9423583 1 223969513 CAPN2 rs6686575 0.2413821 1 17674366 PADI4 rs668668 0.1459739 3 99436424 FILIP1L rs6687882 0.6112865 …
rs6723063 0.7984866 2 178491398 TTC30A rs6723197 0.988896 2 113701598 IL1B rs672795 0.4339102 18 48383881 ME2 rs6732127 0.4578977 2 207479702 ADAM23 rs6732506 0.923984 2 210929742 KANSL1L rs6733426 0.5074331 2 180830958 CWC22 rs6733617 0.1966177 2 180807986 CWC22 rs6734107 0.07545077 2 207132517 ADAM23 rs6735739 0.8429681 2 113609886 IL1B rs6735752 0.5706231 2 110303312 SOWAHC rs6736775 0.3950707…
rs6773495 0.9552362 3 136240403 SLC35G2 rs6773604 0.8451631 3 136169737 SLC35G2 rs6775389 0.6669227 3 136659724 SLC35G2 rs6776205 0.2463675 3 141472655 RNF7 rs6777622 0.4176322 3 99787982 FILIP1L rs677978 0.2063082 18 48434279 ME2 rs6779782 0.7889854 3 131081171 NUDT16P1 rs678046 0.2043192 18 48468781 ME2 rs6782796 0.338642 3 141440993 RNF7 rs6783 0.6947717 13 21297050 IL17D rs6783508 0.6452991 3…
rs6832102 0.3590259 4 88218724 HSD17B11 rs6832511 0.1287706 4 88909088 HSD17B11 rs6834314 0.3453784 4 88213808 HSD17B11 rs6834488 0.7603813 4 88178919 HSD17B11 rs6837088 0.9965376 4 88400924 HSD17B11 rs6838095 0.1291528 4 88909436 HSD17B11 rs6845304 0.5881011 4 88280502 HSD17B11 rs6845839 0.1730824 4 88447335 HSD17B11 rs6847980 0.9070746 4 88180631 HSD17B11 rs6849526 0.5581762 4 88209015 HSD17B11…
rs6943788 0.1003808 7 139087697 FMC1 rs694388 0.009692109 9 135957452 CEL rs6943973 0.2382261 7 139029893 FMC1 rs6944104 0.1597324 7 139051120 FMC1 rs6944286 0.3218666 7 108062956 PNPLA8 rs694429 0.09108346 3 99459669 FILIP1L rs6946037 0.4310137 7 73236715 ABHD11 rs694609 0.232336 13 28194806 POLR1D rs6947215 0.206773 7 139026638 FMC1 rs6947264 0.3790069 7 73193995 ABHD11 rs6947309 0.1880947 7 13…
rs6969699 0.1277415 7 139128278 FMC1 rs6973727 0.3961488 7 108039978 PNPLA8 rs6973851 0.954774 7 129986338 CPA4 rs6974099 0.1003899 7 139098566 FMC1 rs6975713 0.5275272 7 73340743 ABHD11 rs6976667 0.7410146 7 24805050 DFNA5 rs6978680 0.1041293 7 139112048 FMC1 rs698023 0.1128956 14 59134382 ARID4A rs6980319 0.009308894 7 108132453 PNPLA8 rs698127 0.7298068 12 70469691 CNOT2 rs7004 0.4085265 20 33…
rs7106757 0.3887465 11 74763783 XRRA1 rs710690 0.3056576 12 70449962 CNOT2 rs710891 0.7766875 16 3710097 CLUAP1 rs7109716 0.4381224 11 74776211 XRRA1 rs7110132 0.1420382 11 57997135 CTNND1 rs7110384 0.421161 11 74764178 XRRA1 rs7111955 0.1619532 11 74722153 XRRA1 rs7112525 0.9526305 11 74759185 XRRA1 rs7115499 0.5276127 11 74705602 XRRA1 rs7116256 0.07874366 11 58131670 CTNND1 rs7117020 0.1610905…
rs7147022 0.3402496 14 64640068 ESR2 rs7147201 0.148532 14 55358877 GCH1 rs7147275 0.8204846 14 55233524 GCH1 rs7147286 0.007398821 14 55358665 GCH1 rs7147394 0.004636202 14 23411054 HAUS4 rs7147757 0.9674986 14 58752587 ARID4A rs7148284 0.598361 14 94748787 IFI27L1 rs7148637 0.3267059 14 64665060 ESR2 rs7149563 0.8817553 14 94602600 IFI27L1 rs7149735 0.6135357 14 58756421 ARID4A rs7150045 0.8422…
rs716531 0.9895576 2 180839109 CWC22 rs7165834 0.4144063 15 73272178 PARP6 rs7166470 0.5998303 15 73271964 PARP6 rs7166915 0.59666 15 57812065 CGNL1 rs7167112 0.02657749 15 57808593 CGNL1 rs716719 0.3907918 7 50325717 IKZF1 rs7168095 0.08236956 15 57779035 CGNL1 rs7170267 0.1169 15 57781235 CGNL1 rs7170456 0.09110766 15 72469946 PARP6 rs717069 0.4484585 10 14652933 FAM107B rs7171864 0.1107561 15 …
rs7192380 0.2625736 16 69704342 COG4 rs7192865 0.5360165 16 70506907 COG4 rs7193072 0.06402102 16 56778067 NUP93 rs7193402 0.2532088 16 28586127 NFATC2IP rs7194730 0.6983757 16 53489190 AKTIP rs7195932 0.8621652 16 56749909 NUP93 rs7196117 0.8394322 16 56749994 NUP93 rs7196196 0.7263345 16 3411855 CLUAP1 rs7196201 0.8343957 16 70631033 COG4 rs7196474 0.4190733 16 276161 HBQ1 rs7197253 0.4197279 1…
rs7209968 0.2643787 17 39594679 NT5C3B rs7210185 0.2810947 17 39611498 NT5C3B rs7210442 0.2669873 17 16764930 FLCN rs7210446 0.4328928 17 64307014 PRKCA rs7210771 0.1459956 17 64277240 PRKCA rs7210856 0.312452 17 17272715 FLCN rs7211424 0.01875945 17 64507560 PRKCA rs7211683 0.7312859 17 64127555 PRKCA rs7212060 0.3094666 17 64215398 PRKCA rs7212477 0.3091607 17 64215845 PRKCA rs7212675 0.1814229…
rs7224188 0.8977202 17 64527608 PRKCA rs7224627 0.2635509 17 39581993 NT5C3B rs7224654 0.2282439 17 39641499 NT5C3B rs7224899 0.1684657 17 64394179 PRKCA rs7225117 0.4232224 17 40197716 NT5C3B rs7225197 0.7590215 17 64197259 PRKCA rs7225537 0.02085943 17 16912680 FLCN rs7225743 0.9085313 17 16810421 FLCN rs722579 0.4164693 16 70528224 COG4 rs7225877 0.2180228 17 39611867 NT5C3B rs7225958 0.487558…
rs7251275 0.6690393 19 44140605 XRCC1 rs7251295 0.6985446 19 50096859 FCGRT rs7251338 0.04334493 19 49978936 FCGRT rs7251424 0.2417119 19 2321430 LSM7 rs7251447 0.2678727 19 19637930 TMEM161A rs7252391 0.6772033 19 44142771 XRCC1 rs7252512 0.9714347 19 43975513 XRCC1 rs7253244 0.4744388 19 19115851 TMEM161A rs725521 0.2776179 20 33516071 UQCC1 rs7256116 0.9134444 19 50038220 FCGRT rs7256648 0.424…
rs7317882 0.4423205 13 114916406 RASA3 rs7317994 0.2031667 13 114817068 RASA3 rs7317997 0.8384518 13 114762917 RASA3 rs7318180 0.0456595 13 114817170 RASA3 rs7318586 0.9357438 13 21310298 IL17D rs7318857 0.5549404 13 21433107 IL17D rs7319026 0.6824144 13 21227440 IL17D rs7319891 0.9861809 13 21250073 IL17D rs7320606 0.138991 13 21052521 IL17D rs7322678 0.9424051 13 21401400 IL17D rs7323117 0.4704…
rs7339069 0.6955825 13 21156139 IL17D rs7342847 0.1662572 17 64802544 PRKCA rs7342920 0.4805319 17 64244645 PRKCA rs7350749 0.001909566 14 23385330 HAUS4 rs735144 0.5046541 16 56883924 NUP93 rs735830 0.9602535 16 3695354 CLUAP1 rs7359397 0.1471607 16 28885659 NFATC2IP rs735943 0.9309387 1 242030151 EXO1 rs736031 0.343555 20 34048625 UQCC1 rs736032 0.3689258 20 34048661 UQCC1 rs7366009 0.6495316 1…
rs7484827 0.09961473 12 48123563 SLC48A1 rs748762 0.0003441275 14 94565150 IFI27L1 rs748763 0.000325529 14 94564919 IFI27L1 rs748812 0.6297843 7 130007598 CPA4 rs7488942 0.2249211 12 48162480 SLC48A1 rs7489888 0.1381994 13 114611528 RASA3 rs7492600 0.321773 14 55336875 GCH1 rs7493840 0.0003494289 14 94566019 IFI27L1 rs7495739 0.2689288 15 75185670 FAM219B rs7496513 0.3393016 15 73290692 PARP6 rs7…
rs7530328 0.9515077 1 223991552 CAPN2 rs7533542 0.6902676 1 76134654 RABGGTB rs7533551 0.9514596 1 223992581 CAPN2 rs753492 0.5512432 2 110348662 SOWAHC rs7535882 0.8841738 1 224045479 CAPN2 rs7536982 0.2537506 1 68748015 IL12RB2 rs7539624 0.6120158 1 223906827 CAPN2 rs7540009 0.4963094 1 1060235 ISG15 rs7544175 0.1488017 1 16705544 ARHGEF19 rs754553 0.4474014 7 24758852 DFNA5 rs754554 0.4487359 …
rs7577671 0.2439038 2 207426604 ADAM23 rs7578034 0.4933471 2 113718077 IL1B rs7578291 0.8369362 2 60522662 BCL11A rs7578325 0.498887 2 178538376 TTC30A rs7578901 0.9859924 2 178534923 TTC30A rs7579121 0.3597246 2 210721446 KANSL1L rs7580877 0.493141 2 113718310 IL1B rs7581628 0.3687622 2 210737831 KANSL1L rs7581974 0.3686004 2 210738089 KANSL1L rs7582179 0.9003042 2 178370631 TTC30A rs7582445 0.9…
rs7611234 0.5722318 3 141345982 RNF7 rs7611847 0.6476127 3 136652881 SLC35G2 rs7612323 0.8512579 3 141682484 RNF7 rs761312 0.5910073 20 34687809 UQCC1 rs7616988 0.4063639 3 99701134 FILIP1L rs761825 0.9327287 20 34194054 UQCC1 rs761826 0.9385605 20 34194243 UQCC1 rs7619048 0.9798678 3 99927237 FILIP1L rs7619852 0.8266382 3 135844311 SLC35G2 rs7620228 0.486538 3 99790332 FILIP1L rs7623587 0.949737…
rs7660018 0.5594494 4 88354196 HSD17B11 rs766449 0.2939765 1 17674852 PADI4 rs7665549 0.6795276 4 88289758 HSD17B11 rs766778 0.951174 3 99751480 FILIP1L rs7667870 0.8422558 4 88284972 HSD17B11 rs7667924 0.5645281 4 88277732 HSD17B11 rs7668655 0.4197974 4 88217823 HSD17B11 rs7668929 0.8405431 4 88190169 HSD17B11 rs7671557 0.8115747 4 88243252 HSD17B11 rs767329 0.6177691 7 24817067 DFNA5 rs7673763 …
rs7786598 0.7038673 7 129983977 CPA4 rs7786947 0.3928986 7 108090953 PNPLA8 rs7787 0.7064052 13 21297198 IL17D rs7788503 0.3160979 7 108055858 PNPLA8 rs7789785 0.930143 7 130019916 CPA4 rs7789913 0.7827 7 50352695 IKZF1 rs7789940 0.6912122 7 75951230 YWHAG rs7790688 0.9178667 7 130020569 CPA4 rs7791308 0.9733582 7 73195989 ABHD11 rs7792379 0.3589203 7 108071157 PNPLA8 rs7793244 0.7213801 7 733532…
rs7926999 0.559836 11 57703762 CTNND1 rs7927449 0.1642147 11 58015531 CTNND1 rs7928010 0.1114476 11 74569317 XRRA1 rs792828 0.1587879 3 99461120 FILIP1L rs792829 0.1610036 3 99462647 FILIP1L rs792831 0.9583489 3 99473720 FILIP1L rs792833 0.9760127 3 99475268 FILIP1L rs792834 0.1042941 3 99476121 FILIP1L rs792835 0.9754767 3 99476295 FILIP1L rs792836 0.9754767 3 99476384 FILIP1L rs792837 0.9754767…
rs793492 0.1286734 3 99499736 FILIP1L rs793494 0.5041454 3 99508768 FILIP1L rs793495 0.4660417 3 99507934 FILIP1L rs793496 0.3897613 3 99507254 FILIP1L rs793497 0.7641238 3 99505610 FILIP1L rs793499 0.344042 3 99565576 FILIP1L rs793503 0.5324082 3 99588070 FILIP1L rs7935154 0.4416489 11 74421412 XRRA1 rs7936 0.5895274 21 44453372 PKNOX1 rs7943009 0.1806749 11 58032340 CTNND1 rs7943793 0.7607818 1…
rs7985813 0.07961469 13 99592595 CLYBL rs7986001 0.05077414 13 114830132 RASA3 rs7986543 0.7712635 13 114783444 RASA3 rs7986550 0.9132697 13 114878047 RASA3 rs7986934 0.817449 13 114878238 RASA3 rs7986974 0.1327472 13 21056301 IL17D rs7986978 0.1534521 13 28144304 POLR1D rs7987231 0.01739864 13 114856764 RASA3 rs7988455 0.9542051 13 21328445 IL17D rs7988804 0.9497541 13 21405134 IL17D rs7989332 0…
rs8003379 0.5899323 14 64873599 ESR2 rs8003934 0.975552 14 23401142 HAUS4 rs8004018 0.3079918 14 55350696 GCH1 rs8004764 0.4493953 14 56209245 GCH1 rs8005318 0.7269847 14 94717097 IFI27L1 rs8005677 0.8978903 14 23376678 HAUS4 rs8006145 0.9367998 14 64699450 ESR2 rs8006875 0.9831501 14 23405220 HAUS4 rs8006881 0.06780511 14 23325637 HAUS4 rs8007078 0.04763058 14 23335433 HAUS4 rs8007089 0.00679911…
rs8020545 0.06701726 14 55409070 GCH1 rs8021195 0.7362729 14 23487086 HAUS4 rs8021300 0.6384678 14 94512415 IFI27L1 rs8021349 0.3484631 14 94498791 IFI27L1 rs8021481 0.0004981891 14 94572696 IFI27L1 rs8021944 0.8775318 14 64679298 ESR2 rs8022049 0.09248617 14 55462869 GCH1 rs8022694 0.8702059 14 64679747 ESR2 rs8022950 0.8695707 14 94498929 IFI27L1 rs8022966 0.5236836 14 94713935 IFI27L1 rs802378…
rs8047903 0.5273934 16 70070037 COG4 rs8048550 0.03100328 16 69891759 COG4 rs8048590 0.1849226 16 69968367 COG4 rs8048678 0.1849036 16 69968201 COG4 rs8048804 0.9080738 16 56844164 NUP93 rs8048885 0.5703891 16 56800333 NUP93 rs8049033 0.6865401 16 53513055 AKTIP rs8049439 0.131674 16 28837515 NFATC2IP rs8049475 0.8246602 16 70630309 COG4 rs8049693 0.1325628 16 56765226 NUP93 rs8049728 0.2761125 1…
rs8062292 0.1300389 16 56811692 NUP93 rs8062405 0.1277555 16 28837906 NFATC2IP rs8062722 0.7231385 16 3409161 CLUAP1 rs8063029 0.8279718 16 70627228 COG4 rs8063223 0.130552 16 56807579 NUP93 rs8063870 0.8334475 16 56886636 NUP93 rs8063990 0.4403017 16 70526945 COG4 rs8064013 0.4187308 16 70527025 COG4 rs8064550 0.0001294197 17 17033879 FLCN rs8064596 0.5110776 17 4271792 UBE2G1 rs8064837 0.315625…
rs8073842 2.442076e-05 17 16922872 FLCN rs8076291 0.8324944 17 33507928 NLE1 rs8076301 0.7265648 17 40051120 NT5C3B rs8077299 0.01317601 17 17103251 FLCN rs8077306 0.9852847 17 33494186 NLE1 rs8077878 0.204819 17 39613618 NT5C3B rs8078013 0.2149261 17 39613704 NT5C3B rs8078650 0.7677053 17 40120771 NT5C3B rs8079527 0.4157136 17 64515261 PRKCA rs8079563 1.879113e-05 17 16932880 FLCN rs8079676 0.21…
rs8103992 0.4038337 19 19665643 TMEM161A rs8104799 0.5736369 19 19151692 TMEM161A rs8105626 0.9225148 19 50042371 FCGRT rs8105983 0.5073024 19 12172522 ZNF844 rs8106146 0.4137354 19 19146750 TMEM161A rs8107880 0.3422502 19 15954418 UCA1 rs8107930 0.7540321 19 12972397 ZNF844 rs8108243 0.9509921 19 50042829 FCGRT rs8109273 0.2202527 19 12224172 ZNF844 rs8110629 0.582913 19 19174237 TMEM161A rs8111…
rs828259 0.3242639 2 26990507 KCNK3 rs828265 0.3232628 2 26994920 KCNK3 rs828270 0.3249008 2 26970109 KCNK3 rs8342 0.2576522 4 88416223 HSD17B11 rs835647 0.705777 3 136669079 SLC35G2 rs835648 0.871026 3 136671504 SLC35G2 rs841 0.333858 14 55310492 GCH1 rs841859 0.08031772 1 43367875 RIMKLA rs851781 0.8737143 1 242034868 EXO1 rs8557 0.0548513 15 72115733 PARP6 rs8563 0.1021111 10 14561500 FAM107B …
rs881087 0.8941049 1 67846156 IL12RB2 rs881089 0.7707476 1 67846742 IL12RB2 rs881785 0.9801457 19 50173291 FCGRT rs882269 0.0004409595 14 94566559 IFI27L1 rs883504 0.8022253 17 16791658 FLCN rs883814 0.9325471 10 14769911 FAM107B rs885584 0.7663253 13 114781202 RASA3 rs885795 0.3780628 1 16546966 ARHGEF19 rs885948 0.7858665 6 31140532 HSPA1A rs886234 0.7448344 7 24769231 DFNA5 rs886235 0.7452598 …
rs916957 0.0006081703 19 15947217 UCA1 rs916958 0.0682209 19 15922336 UCA1 rs916959 0.06808743 19 15922502 UCA1 rs916960 0.06776977 19 15922724 UCA1 rs917262 0.6578061 7 24606274 DFNA5 rs917263 0.2433086 7 24603096 DFNA5 rs917264 0.6474125 7 24602958 DFNA5 rs918800 0.9025003 2 207393948 ADAM23 rs919 0.6239743 18 12446689 SPIRE1 rs919877 0.669649 11 74558579 XRRA1 rs919941 0.793439 2 110357351 SOW…
rs9303682 0.9740718 17 33492402 NLE1 rs9303770 0.8231032 18 12369341 AFG3L2 rs9303772 0.1455336 18 12609239 SPIRE1 rs9303773 0.1447669 18 12618861 SPIRE1 rs9303774 0.6737694 18 12640421 SPIRE1 rs9303775 0.8941321 18 12694379 SPIRE1 rs9304405 0.7165657 18 48366210 ME2 rs9304407 0.4273481 18 48595393 ME2 rs9309323 0.8796841 2 60490322 BCL11A rs9314890 0.1496236 13 114873155 RASA3 rs9314891 0.151151…
rs941478 0.2934812 14 94571518 IFI27L1 rs941480 0.2939185 14 94571793 IFI27L1 rs941590 0.6134212 14 94756794 IFI27L1 rs941664 0.9603431 20 33939973 UQCC1 rs941665 0.9634976 20 33943281 UQCC1 rs941717 0.6344467 14 23494987 HAUS4 rs941718 0.02539201 14 23495048 HAUS4 rs941721 0.8715054 14 23443962 HAUS4 rs941752 0.7280666 14 58799361 ARID4A rs943188 0.4222693 10 14584301 FAM107B rs943914 0.09284041…
rs9509319 0.6824144 13 21230970 IL17D rs9509329 0.8100777 13 21250225 IL17D rs9509348 0.6370013 13 21290317 IL17D rs9509350 0.6870426 13 21291056 IL17D rs9509356 0.788187 13 21304084 IL17D rs9509366 0.8404998 13 21337141 IL17D rs9509373 0.9519619 13 21357452 IL17D rs9509376 0.9517448 13 21367912 IL17D rs9509384 0.9510434 13 21392846 IL17D rs9509389 0.5495286 13 21407186 IL17D rs9509405 0.6544253 …
rs9525181 0.7290833 13 114875345 RASA3 rs9525187 0.8759915 13 114936731 RASA3 rs9525205 0.5209568 13 114785896 RASA3 rs9525206 0.5182029 13 114787091 RASA3 rs9525253 0.5781564 13 114852930 RASA3 rs9525262 0.7658339 13 114873059 RASA3 rs9525266 0.1585764 13 114875160 RASA3 rs9525267 0.7419418 13 114878438 RASA3 rs9525275 0.7841714 13 114886976 RASA3 rs9525293 0.5519617 13 114946692 RASA3 rs9525319…
rs956390 0.469854 14 58004946 NAA30 rs956952 0.8782782 17 64518507 PRKCA rs9578291 0.1624995 13 21064402 IL17D rs9578313 0.9456483 13 21321254 IL17D rs9578320 0.9267629 13 21377204 IL17D rs9578321 0.9503436 13 21413498 IL17D rs9578333 0.8162708 13 21532130 IL17D rs9579887 0.5993663 13 21122432 IL17D rs9579899 0.696102 13 21156503 IL17D rs9579900 0.702437 13 21156746 IL17D rs9579908 0.6965679 13 2…
rs9635547 0.7612108 16 3416664 CLUAP1 rs9635562 0.9573954 16 3416689 CLUAP1 rs9635753 0.9260702 17 64329197 PRKCA rs9635917 0.8961767 18 29506839 TRAPPC8 rs9637825 0.1413077 5 78527408 JMY rs9639499 0.3226846 7 24552746 DFNA5 rs9639500 0.915382 7 24565188 DFNA5 rs964042 0.2344019 1 16569663 ARHGEF19 rs9641410 0.008880983 7 108110701 PNPLA8 rs9641411 0.0163221 7 108116414 PNPLA8 rs9642120 0.100371…
rs9750931 0.6467284 2 110291855 SOWAHC rs9751717 0.567864 2 110297438 SOWAHC rs9752531 0.6247544 2 110296116 SOWAHC rs976680 0.3481477 7 24529993 DFNA5 rs976681 0.3484688 7 24530016 DFNA5 rs9787162 0.8699709 1 42925688 RIMKLA rs9787775 0.6231424 11 74675896 XRRA1 rs9789405 0.02811655 2 211423383 KANSL1L rs9790 0.8095316 16 3586230 CLUAP1 rs9796292 0.6774618 13 114740938 RASA3 rs9798372 0.4354635 …
rs9842577 0.680985 3 136551620 SLC35G2 rs9845460 0.5701775 3 136587117 SLC35G2 rs9846691 0.6437536 3 136606271 SLC35G2 rs9847283 0.8198946 3 99910320 FILIP1L rs9848867 0.6451756 3 136600048 SLC35G2 rs9849092 0.8993848 3 99810409 FILIP1L rs9849767 0.6042091 3 136561425 SLC35G2 rs9850382 0.657761 3 99915939 FILIP1L rs985062 0.4617492 7 24616474 DFNA5 rs9851645 0.4631164 3 99767409 FILIP1L rs9855314…
rs9896766 0.5224366 17 39983644 NT5C3B rs9896922 0.1785276 17 64513860 PRKCA rs9897002 0.0379378 17 64286494 PRKCA rs9897124 0.01976448 17 64513878 PRKCA rs9897534 0.1854531 17 64520645 PRKCA rs9898205 0.178442 17 64530151 PRKCA rs9898995 0.0001086916 17 16970658 FLCN rs9900213 0.9673334 17 40375881 NT5C3B rs9900495 0.5311605 17 64811502 PRKCA rs9900575 0.5879227 17 39307675 NT5C3B rs9900934 0.28…
rs9919904 0.9770056 14 64620120 ESR2 rs9921152 0.9128076 16 3421199 CLUAP1 rs9921169 0.8141122 16 3421261 CLUAP1 rs9921587 0.6504765 16 53475650 AKTIP rs9921627 0.6781306 16 53482692 AKTIP rs9924487 0.7773739 16 70637804 COG4 rs9924562 0.4022557 16 53449064 AKTIP rs9929873 0.7002105 16 53490676 AKTIP rs9930893 0.2146489 16 3625448 CLUAP1 rs9931702 0.6676087 16 53526551 AKTIP rs9931989 0.2692094 1…
rs9960824 0.1422936 18 12622836 SPIRE1 rs9961799 0.4139322 18 12640494 SPIRE1 rs9962006 0.8912932 18 12700849 SPIRE1 rs9962583 0.8701639 18 48350316 ME2 rs9963809 0.359992 18 12644344 SPIRE1 rs9964759 0.401324 18 12618422 SPIRE1 rs9964804 0.4380666 18 29700550 TRAPPC8 rs9965959 0.9605605 18 48314004 ME2 rs9966118 0.1906155 18 12548858 SPIRE1 rs9966530 0.3495143 18 29424289 TRAPPC8 rs9967026 0.195…
