# Supplementary material for: Integration of genomics and transcriptomics predicts diabetic retinopathy susceptibility genes
Source: eLife. 2020 Nov 9;9:e59980. doi: 10.7554/eLife.59980 (PMC7728435; doi:10.7554/eLife.59980)
Supplement: Figure 4—source data 2. [file elife-59980-fig4-data2.xlsx]

## Sheet: Table 1
rsID META_pval rs1029830 0.01008771 rs1029832 0.006605463 rs1047799 0.0004173205 rs10521328 0.3209128 rs10852842 0.02141321 rs10852844 0.4052773 rs10852845 0.5636259 rs11078368 0.3226883 rs11078371 0.4053022 rs11078372 0.4052773 rs11078373 0.4427335 rs11078374 0.004943921 rs11078382 0.9678377 rs11078384 0.3274717 rs1124961 0.111314 rs1135237 0.1098983 rs11650944 0.5976203 rs11651938 0.4432368 rs1…
rs14003 0.0001119426 rs1567815 0.3052589 rs1613416 0.03251606 rs1630656 0.00711443 rs16942153 0.2590289 rs16961340 0.2372517 rs16961396 0.2185322 rs16961412 0.3455551 rs16961474 0.97145 rs16961493 0.9524839 rs1708618 0.03372376 rs1708620 0.008546714 rs1708623 0.006699565 rs1708627 0.04329965 rs1708628 0.002731271 rs1736200 0.01133285 rs1736202 0.03140839 rs1736204 0.009296784 rs1736205 0.00933348…
rs2292530 0.04823514 rs2294155 0.9818619 rs242249 0.5631101 rs242251 0.722183 rs2472689 0.002707614 rs3182911 0.006546852 rs3744124 0.2052878 rs3744125 0.4007842 rs3744126 0.2073767 rs3744127 0.4445712 rs3744131 0.001642302 rs3744132 0.4440385 rs3744133 0.9233364 rs3744134 0.0004007692 rs3744135 0.2168859 rs3744136 0.4437709 rs3744137 0.01776109 rs3744138 0.01772703 rs3744139 0.0003827674 rs37441…
rs4985696 0.001322666 rs4985699 0.005841279 rs4985701 0.0001291615 rs4985702 0.0001296839 rs4985703 0.4432368 rs4985704 0.3049226 rs4985705 0.03662916 rs4985715 0.7154529 rs4985721 0.01502471 rs4985728 0.282335 rs4985737 0.1630308 rs4985740 3.562987e-05 rs4985741 0.001554789 rs4985742 0.2951978 rs4985749 0.0001234884 rs4985752 0.04090554 rs4985760 0.002836322 rs4985761 0.007481562 rs4985771 0.023…
rs7218781 0.4444624 rs7218795 8.9462e-05 rs7219012 0.9882362 rs7220275 0.01012533 rs7220577 0.004165034 rs7220827 0.01071209 rs7221842 0.001153524 rs7222600 0.2076792 rs7223686 0.2387143 rs7223924 0.6828501 rs7225537 0.02085943 rs7225743 0.9085313 rs7501848 0.04310933 rs7502031 0.04354486 rs7503412 0.02352996 rs758742 0.688038 rs8064550 0.0001294197 rs8065832 0.008514729 rs8066111 0.4401151 rs806…
rs9908205 0.05589112 rs9908767 9.494836e-05 rs9912109 0.02138822 rs9914671 0.001316756 rs9914692 0.316469 rs1029830 0.01008771 rs1029832 0.006605463 rs1047799 0.0004173205 rs10521328 0.3209128 rs10852842 0.02141321 rs10852843 0.8236008 rs10852844 0.4052773 rs10852845 0.5636259 rs11078365 0.8867607 rs11078368 0.3226883 rs11078370 0.8234459 rs11078371 0.4053022 rs11078372 0.4052773 rs11078373 0.442…
rs12451343 0.2851621 rs12452303 0.8338151 rs12452802 0.9232572 rs12453455 0.004064897 rs12600589 0.1870575 rs12600635 0.6004789 rs12601193 0.2309322 rs12601325 0.9221899 rs12601422 0.2400503 rs12601424 0.2166073 rs12601453 0.2346884 rs12601631 0.7065607 rs12602129 0.8229507 rs12602196 0.2168266 rs12602592 0.2940702 rs12602675 0.305268 rs12602867 0.9230593 rs12603267 0.6741868 rs12603417 0.2855852…
rs1736219 0.009664906 rs17726673 0.07984823 rs17726703 0.08694689 rs17794159 0.1073344 rs17794784 0.001625599 rs17804843 0.8308336 rs2012954 0.002869013 rs2017878 0.7048907 rs2089177 0.7964278 rs2090018 0.0001229321 rs2270180 0.9380238 rs2271520 0.0001743974 rs2292526 0.442497 rs2292527 0.197637 rs2292528 0.2185936 rs2292530 0.04823514 rs2294155 0.9818619 rs242251 0.722183 rs2472689 0.002707614 r…
rs4074612 0.4017082 rs4074819 0.4423759 rs4078062 0.1108576 rs4078534 0.2371564 rs4247118 0.0001233844 rs4264448 0.8234769 rs4267379 0.003637184 rs4273077 0.3671401 rs4275914 8.265666e-05 rs4280293 0.4886357 rs4313843 0.8815221 rs4360974 0.8278279 rs4444380 0.8802928 rs4465638 0.9896845 rs4561508 0.3878214 rs4606773 0.8236008 rs4629023 0.3217378 rs4985695 0.7965484 rs4985696 0.001322666 rs4985697…
rs4985778 4.899161e-05 rs6502526 0.8287789 rs6502563 0.0001347242 rs6502565 0.2087092 rs6502578 0.02639107 rs6502579 0.1003216 rs6502580 0.6986607 rs6502582 0.3082773 rs7206981 0.0001442051 rs7207187 0.8419084 rs7207485 3.54898e-05 rs7208929 2.801968e-05 rs7208973 0.0001319809 rs7210339 0.8235078 rs7210442 0.2669873 rs7210856 0.312452 rs7214075 0.8798813 rs7214429 0.01921426 rs7217091 3.74486e-05…
rs8067563 0.9368313 rs8068857 0.1656693 rs8069049 0.1724292 rs8069241 0.2372517 rs8069259 0.302492 rs8069441 0.1706034 rs8069610 0.4590778 rs8069906 0.8171936 rs8072184 0.005097937 rs8072394 0.4884119 rs8072402 0.01023922 rs8072869 0.016712 rs8076273 0.926102 rs8079563 1.879113e-05 rs8080386 0.1029777 rs883504 0.8022253 rs9890243 0.6339067 rs9894565 8.497422e-05 rs9894818 0.7701657 rs9895995 0.45…
