# Supplementary material for: Integration of genomics and transcriptomics predicts diabetic retinopathy susceptibility genes
Source: eLife. 2020 Nov 9;9:e59980. doi: 10.7554/eLife.59980 (PMC7728435; doi:10.7554/eLife.59980)
Supplement: Figure 4—source data 3. [file elife-59980-fig4-data3.xlsx]

## Sheet: Table 1
rsid pval rs4383187 0.4485064 rs4404112 0.509729 rs7501848 0.04310933 rs7502031 0.04354486 rs6502552 0.01046168 rs7225537 0.02085943 rs4267379 0.003637184 rs17793728 0.01250203 rs10852842 0.02141321 rs11870422 0.01785914 rs11870997 0.01787784 rs4985721 0.01502471 rs17720904 0.02254754 rs4985699 0.005841279 rs3744138 0.01772703 rs3744137 0.01776109 rs7214429 0.01921426 rs3744131 0.001642302 rs2292…
rs1736211 0.001352983 rs1736209 0.005059417 rs1736208 0.001365026 rs12600635 0.6004789 rs1277277861 0.6004789 rs9890243 0.6339067 rs9896078 0.6348099 rs16961474 0.97145 rs1708627 0.04329965 rs1736205 0.009333482 rs1708628 0.002731271 rs7220577 0.004165034 rs2294155 0.9818619 rs1736204 0.009296784 rs1736202 0.03140839 rs1736200 0.01133285 rs1708623 0.006699565 rs9903294 0.006671075 rs2472689 0.002…
