# Supplementary material for: Integration of genomics and transcriptomics predicts diabetic retinopathy susceptibility genes
Source: eLife. 2020 Nov 9;9:e59980. doi: 10.7554/eLife.59980 (PMC7728435; doi:10.7554/eLife.59980)
Supplement: Figure 4—source data 6. [file elife-59980-fig4-data6.xlsx]

## Sheet: Table 1
rs4360974 0.418456 rs6502526 0.41667 rs8069906 0.56803 rs9895995 0.266746 rs9905280 0.510032 rs4313843 0.46328 rs8069610 0.356794 rs883504 0.524028 rs8072394 0.297646 rs4280293 0.297646 rs4465638 0.258369 rs4316813 0.885266 rs8068857 0.885014 rs8069441 0.88492 rs4275914 0.032543 rs11867934 0.0682619 rs11870422 0.306025 rs7221842 0.0985715 rs7223686 0.0122773 rs9898995 0.0264556 rs7208929 0.017042…
rs7218795 0.00117029 rs3803761 0.00088015 rs4985705 0.0212816 rs8080386 0.0156929 rs8065832 0.0690378 rs1736217 0.0087442 rs1708620 0.179454 rs1736216 0.0291089 rs1736214 0.0781241 rs1736212 0.000135363 rs1736209 8.50125e-05 rs1736208 0.000140602 rs12600635 0.867146 rs9896078 0.858687 rs16961474 0.661556 rs1708627 0.0297446 rs1736205 0.00205301 rs1708628 0.0390409 rs7220577 0.0347849 rs2294155 0.…
rs12601631 0.862478 rs7217764 0.0731856 rs17804843 0.277347 rs56192520 0.560654 rs3764410 0.520611 rs145984817 0.587494 rs1807401 0.581204 rs1807402 0.581204 rs35350506 0.581204 rs2089177 0.581204 rs12325677 0.439302 rs62064624 0.597678 rs62064631 0.525675 rs2349295 0.822348 rs2174369 0.318233 rs7218554 0.317393 rs62064634 0.39847 rs4360974 0.418456 rs4527060 0.41667 rs6502526 0.41667 rs6502527 0…
rs74751226 0.860598 rs8068857 0.885014 rs8069441 0.88492 rs77397878 0.888763 rs75339756 0.888763 rs4608391 0.883293 rs79569548 0.883293 rs4275914 0.032543 rs11867934 0.0682619 rs11870422 0.306025 rs8075751 0.470539 rs11658904 0.450178 rs7222311 0.0155232 rs9898995 0.0264556 rs4985718 0.0264284 rs9893911 0.017042 rs7208929 0.017042 rs76715413 0.0643816 rs74369938 0.0365824 rs4247118 0.013381 rs785…
rs8080386 0.0156929 rs8065832 0.0690378 rs2018781 2.45837e-05 rs1736221 0.0138971 rs1736220 0.0127003 rs1708620 0.179454 rs1708619 0.159905 rs76319098 0.708717 rs1736215 0.0830337 rs1736214 0.0781241 rs1708617 0.000149325 rs12602831 0.902019 rs12602871 0.904206 rs1736213 0.0642667 rs1736212 0.000135363 rs76045368 0.854877 rs34518797 0.857383 rs11078378 0.000149571 rs8079562 0.84405 rs8065774 0.84…
rs9903294 0.154408 rs2472689 0.0435974 rs1630656 0.0313869 rs111478970 0.0313816 rs3182911 0.152653 rs9890657 0.104527 rs12453455 0.0311333 rs12947291 0.15295 rs150267386 0.707153 rs11652745 0.104266 rs9907107 0.104527 rs8070574 0.104527 rs4985759 0.104527 rs3866959 0.0402905 rs7219248 0.104527 rs6502568 0.0452409 rs7220275 0.104527 rs12450037 0.156009 rs7225876 0.0320058 rs9892352 0.044578 rs498…
rs11651957 0.0760361 rs73978990 0.0768052 rs8071007 0.0724223 rs56044345 0.076204
