# Supplementary material for: Integration of genomics and transcriptomics predicts diabetic retinopathy susceptibility genes
Source: eLife. 2020 Nov 9;9:e59980. doi: 10.7554/eLife.59980 (PMC7728435; doi:10.7554/eLife.59980)
Supplement: Source data 1. [file elife-59980-data1.csv]

ID	geneSymbol	geneName	logFC	AveExpr	t	P.Value	adj.P.Val	B
3TXADqtSkhV1IXRHlg	RASA3	RAS p21 protein activator 3	0.263985019010184	-0.0275433734971163	4.46867078636294	3.07218933926741e-05	0.478278436337151	1.52531511023083
34lG83aZ6.WLFnge6s	HBQ1	hemoglobin subunit theta 1	0.395583982345518	-0.00470497934750302	4.217037349009	7.51869627163126e-05	0.585255317783777	0.866053388929775
oS67lguv5HpU4i6Pvg	RIMKLA	ribosomal modification protein rimK like family member A	-0.4107755388123	-0.0436551482696782	-3.93918152329491	0.000195941337524773	0.999463745446798	0.160065545544167
Qpc2sX7gp.W5E2rRS4	FMC1	formation of mitochondrial complex V assembly factor 1 homolog	0.164746968454987	0.0369476421536116	3.73291393816002	0.000390082236501897	0.999463745446798	-0.347133132926969
NqsVOy_yos30cOQRSE	MMADHC	methylmalonic aciduria and homocystinuria, cblD type	-0.133914895663918	0.0173995882389709	-3.67355075767729	0.00047378098264134	0.999463745446798	-0.490200065598906
B3SDpegGjpdxnvU0S0	ARFGEF2	ADP ribosylation factor guanine nucleotide exchange factor 2	-0.158118818690844	0.0144993387412942	-3.66576495732333	0.000485952756626931	0.999463745446798	-0.508863835124491
ZJ5no6EWX5Hvo96s4Q	ADAM23	ADAM metallopeptidase domain 23	0.317888550707249	-0.012265624423781	3.51409581379634	0.000791684897555185	0.999463745446798	-0.86765397336549
lpfvpLHXvCU8t3A9Sc	TRAPPC8	trafficking protein particle complex 8	-0.137270233619958	-0.00196971430679324	-3.51402723461892	0.000791857517489252	0.999463745446798	-0.867814099906165
fcp9ebuwC2Kz56T0q4	SPIRE1	spire type actin nucleation factor 1	-0.139343117572488	-0.0292607327167262	-3.43324637297881	0.00102196250332866	0.999463745446798	-1.05506668642141
6MeKXoSuC4UiJAKQKo	KCNK3	potassium two pore domain channel subfamily K member 3	-0.252476284107525	0.0299582634225235	-3.39836452678658	0.00113975261286953	0.999463745446798	-1.13506826297742
9beWACXVqEQRpRgRVY	RNF126P1	ring finger protein 126 pseudogene 1	-0.235895082941089	0.0287216095399801	-3.37364898604709	0.00123085571792886	0.999463745446798	-1.19143518761271
0rliIY6gA3JIx3gQ1I	CWC22	CWC22 spliceosome associated protein homolog	-0.176438334432872	-0.00683589655039788	-3.36516961838906	0.00126366457060733	0.999463745446798	-1.21071211379893
ZlekT1T_57rs17v1_0	CPA4	carboxypeptidase A4	0.26378469341801	-0.00903867373556311	3.36224096587911	0.00127518676788943	0.999463745446798	-1.21736277307745
lUKCdI5eS08r.JtU4k	CEL	carboxyl ester lipase	0.220328705643204	-0.00828187920923656	3.32109184526421	0.00144792683488738	0.999463745446798	-1.31040821908335
HpLUWXaXFguco8SGwk	CENPH	centromere protein H	0.275284106950614	0.0219052610349082	3.31251921860939	0.00148658665661604	0.999463745446798	-1.32969784717267
912ny6eCHjnlY2XSCU	UCA1	urothelial cancer associated 1 (non-protein coding)	-0.268150852751823	-0.0049991125535477	-3.31057566174041	0.00149548565244216	0.999463745446798	-1.3340665604742
xVs0dJe18BpdlO5PtE	METTL17	methyltransferase like 17	0.133623362002052	0.0163563319614421	3.29684068736686	0.00155981876490155	0.999463745446798	-1.36489168523321
KqvCvTiBToCO63iOrk	CYTIP	cytohesin 1 interacting protein	-0.126660329415067	0.00219404612146846	-3.29666623327483	0.00156065239748358	0.999463745446798	-1.36528266420699
3Qp_0JLudNE6wNOSbo	CSNK2A1	casein kinase 2 alpha 1	-0.163555030269923	0.0309349788043808	-3.28135751864575	0.00163546038428409	0.999463745446798	-1.39953848137914
ocv.0ZeQ36Lcr5ft3U	SOWAHC	sosondowah ankyrin repeat domain family member C	-0.234116479284172	0.00438464100220115	-3.21821083541004	0.00198114525980655	0.999463745446798	-1.53971240318693
3Uleb9T3l90i5X55FQ	SLC48A1	solute carrier family 48 member 1	-0.270581666585165	-0.021691145853267	-3.19986722335436	0.00209375233135046	0.999463745446798	-1.58008757995717
NvkTSXb3V1HoOTu9Hk	TXLNG	taxilin gamma	-0.228642430602421	0.0173709526258438	-3.19512092155154	0.00212385097816831	0.999463745446798	-1.59050891592493
Wu17hRSKTiKhBEd.2c	FAM219B	family with sequence similarity 219 member B	-0.139147338364293	-0.00662435670646212	-3.1902374215319	0.00215524263759941	0.999463745446798	-1.60122051358872
Eqlesp1.IKFP3vXInw	FAM107B	family with sequence similarity 107 member B	-0.161049328638127	0.0185589405558491	-3.1876672932085	0.00217193781642559	0.999463745446798	-1.6068534210469
xJag_eq.I5H.3.iLCo	NAA30	N(alpha)-acetyltransferase 30, NatC catalytic subunit	-0.158690433309486	0.0121303284306824	-3.15246566230715	0.00241314152119152	0.999463745446798	-1.68369172428257
NpJIgEC3oVHU53ldIU	COG4	component of oligomeric golgi complex 4	0.140267436104129	0.030360710460817	3.1444802718949	0.00247124010100916	0.999463745446798	-1.70104077251228
Q5.pTkEgug9Xo4KW0U	RC3H2	ring finger and CCCH-type domains 2	0.122743541932424	-0.0181452820862665	3.1385650073652	0.00251511790365822	0.999463745446798	-1.71387272169286
H10BkpQB2KRdTVQlyg	CARMIL2	capping protein regulator and myosin 1 linker 2	0.175419511223887	0.01324112746053	3.13228941212358	0.00256246419820804	0.999463745446798	-1.72746810441279
ZOluqaxSe3ndekoNng	FLCN	folliculin	-0.275673663613513	-0.0341560397640209	-3.1297275576883	0.00258203055514269	0.999463745446798	-1.73301267441709
3ifA64odx2kCUiR4pc	RNF115	ring finger protein 115	-0.120705885165258	0.0045196871216508	-3.10862536831851	0.00274859389257372	0.999463745446798	-1.77856410146305
r7vwBLWuVF6tROSeko	RGPD1	RANBP2-like and GRIP domain containing 1	-0.420662668702005	-0.038303672527928	-3.10013220091138	0.00281842158706962	0.999463745446798	-1.79683711255007
QW23.5Gp32kkAcH0HU	ABHD11	abhydrolase domain containing 11	0.172994817049627	0.0329422575133466	3.07963299991131	0.00299383727942222	0.999463745446798	-1.84079731480217
NUl.2l3H1FJH6SnXJ4	TMEM161A	transmembrane protein 161A	-0.234441391918568	0.029308315364475	-3.07345798645772	0.00304864129577807	0.999463745446798	-1.85399953213033
6pu4U2ZKum.5cM9Ka4	HIST1H2AB	histone cluster 1 H2A family member b	0.191097112360166	0.0305498419737192	3.06963582342934	0.00308303057032233	0.999463745446798	-1.8621620289161
xg3S30l5Hj_yXke3x4	AKTIP	AKT interacting protein	-0.107319922125878	0.0482161924171139	-3.05914990679692	0.00317924136614588	0.999463745446798	-1.8845187901851
97UiqveVfuClT16R8g	PKNOX1	PBX/knotted 1 homeobox 1	0.115945892938289	0.0521799095470393	3.05833685088452	0.00318681701445541	0.999463745446798	-1.88625003852678
HW11.V4kX00Uin4KBU	NT5C3B	5'-nucleotidase, cytosolic IIIB	0.0991387549950233	0.00112804132570997	3.04144418679079	0.00334806904884718	0.999463745446798	-1.92214634035254
QwK619cXe67u2ZESfI	RNF7	ring finger protein 7	-0.099590120839897	-0.00180540549895452	-3.03853081625999	0.00337663555532964	0.999463745446798	-1.92832294957569
oon0If5P1yz97_0vdA	HSPA1A	heat shock protein family A (Hsp70) member 1A	-0.216971266352904	-0.0748351610863313	-3.03451443215237	0.00341638949573015	0.999463745446798	-1.93683118045363
055155VOJ7lC7lSp5M	MT1A	metallothionein 1A	0.211553046612898	0.0436470246350833	3.02025871168155	0.00356103484490618	0.999463745446798	-1.96696580293414
ZClHkBfoSHnnorlltg	TNFRSF18	TNF receptor superfamily member 18	-0.257563076079045	-0.00763833547925552	-3.00756646730591	0.00369458814402094	0.999463745446798	-1.99371056676742
cL5QJdeUJ9QJRW_hUI	STAP2	signal transducing adaptor family member 2	-0.215474277443439	0.00731019276090329	-2.98481294133622	0.00394572772973343	0.999463745446798	-2.04145491376329
fkXnESSnsRJI0se9BI	IL12RB2	interleukin 12 receptor subunit beta 2	-0.253148111063568	0.0708895785993729	-2.97137766371587	0.0041013669486388	0.999463745446798	-2.06952451669348
T7Id6hzSCIHhUxe3JU	NUDT16P1	nudix hydrolase 16 pseudogene 1	0.195616582404629	-0.0305208437978009	2.96871219300291	0.00413291395372505	0.999463745446798	-2.07508252542481
BaRT4sTmIV4YUsQnRo	LSM7	LSM7 homolog, U6 small nuclear RNA and mRNA degradation associated	0.091626507127572	0.0389134498152218	2.96342631404654	0.00419614135266347	0.999463745446798	-2.08609396154314
Wqe0gjFK1E11ToEjgM	PHF6	PHD finger protein 6	-0.197866435150638	0.0058135438428589	-2.95314424141658	0.00432170768111053	0.999463745446798	-2.10747284871856
Hh6pXdf3O10NeXh360	ARHGEF19	Rho guanine nucleotide exchange factor 19	0.170462948013013	0.0187285774419234	2.94352580869864	0.00444231331809737	0.999463745446798	-2.12742328366737
0UJEk_SS9YICJj1VF0	EXO1	exonuclease 1	0.140241909331461	0.0555154824250206	2.92766315389503	0.00464804588836159	0.999463745446798	-2.16022240684023
u_M5UdFdhg3lZ.qe64	UBE2G1	ubiquitin conjugating enzyme E2 G1	0.107172152501	-0.0544922087550218	2.92007202916031	0.00474958851761102	0.999463745446798	-2.17587299982304
0yeeXXDfXnLqFF9F6o	HAUS4	HAUS augmin like complex subunit 4	0.118707833486298	0.0551477424853523	2.90914991858975	0.00489929235099928	0.999463745446798	-2.19833916722613
3qBhqf9R4KuCE6SXzw	KANSL1L	KAT8 regulatory NSL complex subunit 1 like	0.219350192481595	0.0317312512839097	2.90848245387984	0.00490858093555265	0.999463745446798	-2.19971011472025
3Hcr9x_P.VU7MX9N70	RABGGTB	Rab geranylgeranyltransferase beta subunit	-0.120305129016394	-0.0142386749932977	-2.90803803615242	0.00491477457642045	0.999463745446798	-2.200622804797
ZNUn_KKV46EFXV6T28	XRCC1	X-ray repair cross complementing 1	0.122799041006896	0.0472384906542676	2.90360607132833	0.00497693730941779	0.999463745446798	-2.20971905520232
iqc4krSIuv5ICEiCNI	ZHX1	zinc fingers and homeoboxes 1	-0.128159230457505	0.0342581956241443	-2.90088733769085	0.00501542908567153	0.999463745446798	-2.21529402225724
Quee3p14FSeyK7u0NU	NA	NA	-0.125257465450332	-0.00867812475492558	-2.893082337512	0.00512746602466415	0.999463745446798	-2.23127753960188
B6KklUShr84kRDzJ_8	CAPN2	calpain 2	0.223043324683592	0.00288315332943961	2.88504736438581	0.00524521569178252	0.999463745446798	-2.2476990615489
9kY3XkIM1WRNAjoiAg	ARID4A	AT-rich interaction domain 4A	-0.197994765082716	-0.0329596940826366	-2.88386158726477	0.00526280277266554	0.999463745446798	-2.25011966472595
0UUyBURqIiN8we4weY	ZNF222	zinc finger protein 222	-0.214599066096784	-0.0224442862600683	-2.8817350414158	0.00529447949359875	0.999463745446798	-2.25445889072481
NFhtJB9hii9FqilVEc	PKN1	protein kinase N1	0.143550153434234	0.00323905894618843	2.85970811962213	0.00563310110524596	0.999463745446798	-2.29926640371385
EXip4AaIqDqIfjPwkk	YWHAG	tyrosine 3-monooxygenase/tryptophan 5-monooxygenase activation protein gamma	-0.15685209787083	-0.0332850643608766	-2.85937367254334	0.00563839317978549	0.999463745446798	-2.29994478906167
6ooIhor4r.197MJFx4	PRKCA	protein kinase C alpha	-0.242204768384004	-0.00958979436347394	-2.85644791810418	0.00568488427588147	0.999463745446798	-2.30587683063157
6VYPhBUB3UhNFB7VeY	IKZF1	IKAROS family zinc finger 1	-0.180952278997889	0.00820565879953099	-2.85370053194138	0.00572886255577576	0.999463745446798	-2.31144314392299
cVItIoYIop.F_RIeog	JMY	junction mediating and regulatory protein, p53 cofactor	-0.181067579706955	-0.0142245981029217	-2.8522216439226	0.00575266522280807	0.999463745446798	-2.31443779151981
ofkE.J3oLFxRP8iPxY	MPLKIP	M-phase specific PLK1 interacting protein	-0.186454678249489	0.0271812186610563	-2.850764508802	0.00577620690248926	0.999463745446798	-2.31738726900161
uF4JJC4mp6Ku5KGF70	ISG15	ISG15 ubiquitin-like modifier	0.115440636237909	-0.0161251376844487	2.84769619266134	0.0058260696577611	0.999463745446798	-2.32359439395774
NERV5_oVyczk.zuF_U	GSDME	gasdermin E	0.100967298674027	-0.028308283342156	2.84291377999984	0.00590457937261053	0.999463745446798	-2.33325922988048
BeSI0N6Kfe.eT3lGIk	IL17D	interleukin 17D	0.215073252614632	0.0416141362713632	2.84022705311827	0.00594911203907526	0.999463745446798	-2.33868359175573
r7pKjb5Hod_m7qCo58	AFG3L2	AFG3 like matrix AAA peptidase subunit 2	0.11551669865285	0.0263112650782821	2.83650308895496	0.00601134866340211	0.999463745446798	-2.34619579645391
0imNKASmBCg2dSKkAU	LSM14B	LSM family member 14B	-0.223872369049956	-0.0255974893481717	-2.82197273842291	0.00625996367317704	0.999463745446798	-2.3754373082568
xlCAyVWRFFe5VI46Pg	PPP1CA	protein phosphatase 1 catalytic subunit alpha	0.135559573642088	0.0290561794904575	2.81739188519637	0.00634028257043406	0.999463745446798	-2.38463286252383
imM9It1UhaS006S.SY	FILIP1L	filamin A interacting protein 1 like	-0.199680296910893	0.0212383516815462	-2.81678498699802	0.00635099451837482	0.999463745446798	-2.38585030884025
uXuUddQlQnoR30gFc4	XRRA1	X-ray radiation resistance associated 1	-0.239984440672624	-0.0487151600369814	-2.8147890091789	0.00638634168614199	0.999463745446798	-2.38985289045572
EXykpF1BRREdXnv9Xk	MKI67	marker of proliferation Ki-67	0.153691868971201	0.0369608032420063	2.81265793870654	0.00642428089892361	0.999463745446798	-2.39412404271565
W6nUq1JUQnk0p3eoig	AGPAT2	1-acylglycerol-3-phosphate O-acyltransferase 2	0.162996977266852	0.020535258977404	2.80909428220745	0.00648818768838133	0.999463745446798	-2.40126103523319
oUL016nU_reU_ae0_Y	IFI27	interferon alpha inducible protein 27	0.201585654155479	-0.144482340971813	2.80608425031319	0.00654262118591504	0.999463745446798	-2.4072840151664
0tUv1R3gjVBOtckeRE	PADI4	peptidyl arginine deiminase 4	0.299158178175399	0.0672929959697025	2.80584914937366	0.00654689038469449	0.999463745446798	-2.40775424187291
ZVeFV6nhQDuf3HuLVw	HYOU1	hypoxia up-regulated 1	0.151528087349409	-0.0044502200948938	2.79889540219405	0.00667432742206223	0.999463745446798	-2.42164915934283
uXnlI7s4OlIN5NCV14	ME2	malic enzyme 2	0.0980499751208113	-0.0267961332116075	2.78649333673892	0.00690728502577036	0.999463745446798	-2.44636680855182
ulb4fPU_bd5.Ks6.rY	CGNL1	cingulin like 1	-0.217582392380295	0.00176230191679301	-2.78081862045558	0.00701634774431078	0.999463745446798	-2.457649229158
NeV6UNKYhl.uJ7i5dc	DIABLO	diablo IAP-binding mitochondrial protein	0.102609108393304	-0.00810218624419014	2.77873832016332	0.00705672354685908	0.999463745446798	-2.4617809391623
H1Ko5d5fZMkR5_KV5Q	NLE1	notchless homolog 1	0.203817781417116	0.0550058071598737	2.77871051558002	0.0070572646373281	0.999463745446798	-2.46183614646223
NTqUQN3ELl5zV3VHVQ	ERF	ETS2 repressor factor	0.138742184718496	0.0118537197913811	2.77153075432934	0.00719826754155488	0.999463745446798	-2.47607800191661
xTdvpfr2nLrOiq55ck	PARP6	poly(ADP-ribose) polymerase family member 6	-0.160566144017043	0.0263933829270604	-2.76493533447208	0.00733006750457471	0.999463745446798	-2.48913631980849
ThTVACguRfol7ondCA	CTNND1	catenin delta 1	-0.199616335369569	0.0243474711552796	-2.74658734945884	0.00770845268890477	0.999463745446798	-2.52534015026818
uAcgyF3WUWJ57tGV0k	POLR1D	RNA polymerase I subunit D	0.0957805980663229	0.0124400693975993	2.74499472550467	0.00774212684246845	0.999463745446798	-2.52847408883012
Km0V6k30X7YXQhMh9Q	CNOT2	CCR4-NOT transcription complex subunit 2	0.0983306297359729	0.00298623928563372	2.74217191555299	0.00780214306287831	0.999463745446798	-2.53402538714814
iglSihwJ4ATV577jIg	SLC30A1	solute carrier family 30 member 1	0.13066406890544	-0.0249111070972991	2.74079068062604	0.00783166470263982	0.999463745446798	-2.53674012892698
fn060RMSkQASTzuhl0	IL23R	interleukin 23 receptor	-0.241052197683962	0.0412540795940397	-2.73850602723844	0.00788072004001779	0.999463745446798	-2.541228216613
WaqX1dq1ekgIT.FX34	TMEM145	transmembrane protein 145	-0.174810981537993	0.0111848689778725	-2.73405468363113	0.00797710677482753	0.999463745446798	-2.5499645124694
lX9pEnSl__BNIh1Meo	ZNF485	zinc finger protein 485	-0.157791350971354	-0.0226548781671136	-2.73196488835926	0.00802272914087776	0.999463745446798	-2.5540622690454
odF3XHR8CVl4SAUaUQ	IL1B	interleukin 1 beta	-0.289089652844239	0.00972599802565492	-2.73126831046791	0.00803798913320637	0.999463745446798	-2.55542761943839
ui7IehIRKnH3i6KJIQ	WDR12	WD repeat domain 12	0.0760888363147055	0.000248574842184707	2.72940982249458	0.00807883326416751	0.999463745446798	-2.55906911700226
WrgvUtBR.8VeA.QjDk	PNPLA8	patatin like phospholipase domain containing 8	-0.226212457625405	-0.0468091346611406	-2.72445034586402	0.00818875941096791	0.999463745446798	-2.5687774388082
ldUuB4OKBOe3Xt_l1U	UQCC1	ubiquinol-cytochrome c reductase complex assembly factor 1	0.119687103202548	-0.0149589971047545	2.7226629286419	0.00822871154526957	0.999463745446798	-2.57227307202297
0RjkK6IdY4Q4odooi4	CLUAP1	clusterin associated protein 1	-0.147422327845882	-0.000726497212441251	-2.72195502917407	0.00824458365886244	0.999463745446798	-2.57365702154721
K7j1JRZeFNZT1h5wCY	FCGRT	Fc fragment of IgG receptor and transporter	-0.177501891060991	-0.0376501709061068	-2.7217078265728	0.00825013288637793	0.999463745446798	-2.57414024029738
HhNwLzaqf56hJ36pek	IFI27L1	interferon alpha inducible protein 27 like 1	0.20349509274192	-0.0373411160989262	2.71250520798617	0.00845916077514788	0.999463745446798	-2.59210527521115
uOeuy3MTSP7_cRCNdI	HSD17B11	hydroxysteroid 17-beta dehydrogenase 11	0.187754095485437	0.0184466864258757	2.7040697534874	0.00865500433005419	0.999463745446798	-2.60853194862239
9QT_iPusnOt_SfdueQ	SLC35G2	solute carrier family 35 member G2	-0.234857210541474	-0.0530356961496301	-2.69494289464053	0.00887155875815488	0.999463745446798	-2.62626102306196
x5EAUeUjBSKpeoKiCA	GCH1	GTP cyclohydrolase 1	0.234425670514721	-0.00614025250841168	2.6936300327908	0.00890311308177498	0.999463745446798	-2.62880750987726
BeUdB9I5MgI9EemIBU	ZNF844	zinc finger protein 844	0.176912632062159	0.0279768232737982	2.69353310867039	0.00890544668697374	0.999463745446798	-2.62899547071345
iOZenBdeOde1RtKTmI	ESR2	estrogen receptor 2	-0.186924913813116	0.0327984534731989	-2.6863785583993	0.00907925399966384	0.999463745446798	-2.6428556925923
QVXt9Aq3H4iMuu.Hnk	TTC30A	tetratricopeptide repeat domain 30A	-0.156708188522726	0.0213991753942114	-2.68033429629125	0.00922849510867572	0.999463745446798	-2.6545429892713
lVMMSqiUfqSikqKrU8	ASNA1	arsA arsenite transporter, ATP-binding, homolog 1 (bacterial)	0.28737267746235	-0.067017094764304	2.67274456635923	0.00941906421646489	0.999463745446798	-2.66919002523073
KWJd_CU98SOOBSFGlY	BCL11A	B-cell CLL/lymphoma 11A	0.221274207002781	-0.0427371685249981	2.67080427460629	0.00946835515831446	0.999463745446798	-2.67292937663007
WJV5Iu66FE6UVF_q7U	NFATC2IP	nuclear factor of activated T-cells 2 interacting protein	0.237415862338191	-0.0170117052858389	2.6652556778604	0.00961061158666655	0.999463745446798	-2.68361117115497
6fhpkedH3qqV.SKR.w	SLC48A1	solute carrier family 48 member 1	-0.175622107999041	0.0302851419548297	-2.66430327204218	0.0096352245856392	0.999463745446798	-2.68544296217639
N2E5Tx4JKVIEe8Z_UU	CLYBL	citrate lyase beta like	0.167860088907355	-0.0173117205448701	2.6613200433825	0.0097126922962617	0.999463745446798	-2.69117743524955
TYoWYd0HWC0JWR3jxc	NUP93	nucleoporin 93	0.101358946131504	0.0210663935054752	2.65098319457271	0.00998552661120262	0.999463745446798	-2.71100901288256
0Us8a5d93lV.VKs3uo	CLCF1	cardiotrophin like cytokine factor 1	-0.150920340338453	-0.0563964460521073	-2.64885492900889	0.0100425598150211	0.999463745446798	-2.71508476884909
W.knji5z0AKCrN6CWk	GPD2	glycerol-3-phosphate dehydrogenase 2	-0.164901068275745	0.00431516191710004	-2.64611368633369	0.0101164564892792	0.999463745446798	-2.72033068873421
xrlPVJvy.cil0v3U0k	MTHFR	methylenetetrahydrofolate reductase	-0.172178440455307	-0.0128196729621439	-2.64274632659715	0.0102079088708374	0.999463745446798	-2.72676906656632
TN4l1ZIoOSDhlGkZKM	HHLA3	HERV-H LTR-associating 3	0.140654217413918	0.00497421738620459	2.64153153360678	0.010241085025503	0.999463745446798	-2.72909019047818
H30XXrlc1ZAOp9eXr8	ITK	IL2 inducible T-cell kinase	-0.159091069567212	0.0185662928170284	-2.63902724922829	0.0103097871436665	0.999463745446798	-2.73387256168631
feiVLO57uLyC09_eII	OPTN	optineurin	-0.10330845696933	0.00289610822795879	-2.63844121722289	0.010325924668676	0.999463745446798	-2.73499118625219
W_IgEDij7Av6ofF3sk	SELENOT	selenoprotein T	0.261157316444806	0.00886550871745909	2.63666870454024	0.0103748741900684	0.999463745446798	-2.73837340876517
opRGSKIDrfOrrieLHg	SIRT5	sirtuin 5	0.0999818430514552	0.0015354731696072	2.63332171832839	0.0104678801593359	0.999463745446798	-2.74475516745178
xe8O2RSAOSkdJCgqUU	E2F8	E2F transcription factor 8	0.15103736241497	0.081295255131884	2.63278136891125	0.0104829662625807	0.999463745446798	-2.74578487293157
uJK0inXB6kHQj3p9x4	EIF3E	eukaryotic translation initiation factor 3 subunit E	-0.0772169943188623	0.00741801225240006	-2.63081528547275	0.0105380246557438	0.999463745446798	-2.74953011710416
KiTsYpy5E71n.jjqFI	ARSK	arylsulfatase family member K	-0.155648629955961	0.023790383980048	-2.62438830532807	0.0107198459120698	0.999463745446798	-2.76175790780122
H3lUpXHFT71fXfXlfg	PLD2	phospholipase D2	-0.194719204816898	0.00156328837333784	-2.62355670931482	0.0107435792001342	0.999463745446798	-2.76333838392826
utCg_HgYHCJ16OrWoE	ACSF2	acyl-CoA synthetase family member 2	0.126968981200503	0.00647932947174982	2.6229765853604	0.0107601638799125	0.999463745446798	-2.76444069883304
N_XLnEBfXuodLt9KQ4	C3orf52	chromosome 3 open reading frame 52	-0.255825634568866	0.0212032586435884	-2.62140528371352	0.0108052014261149	0.999463745446798	-2.76742543677397
3DSp5kfV7Ua1UpfXt8	SCLY	selenocysteine lyase	0.132215279192433	-0.0323848472273328	2.62031911491801	0.0108364338709746	0.999463745446798	-2.76948783768542
TiHquTdSJR0RXQXb9c	ZSWIM4	zinc finger SWIM-type containing 4	-0.110477441234973	0.0133219900188669	-2.61485807117559	0.0109947109235575	0.999463745446798	-2.77984712400179
06TJxbi90koH1SY4w4	ALDH5A1	aldehyde dehydrogenase 5 family member A1	0.115198626877738	0.0616556995918442	2.61406968029448	0.0110177334465173	0.999463745446798	-2.78134126882392
QeyHPdCs8HZIV3qrKo	DLG5	discs large MAGUK scaffold protein 5	-0.246474627371758	0.0628496432068939	-2.61363171002858	0.0110305419254824	0.999463745446798	-2.78217115118823
ZenwHontUmDShnS0d4	TRIM7	tripartite motif containing 7	0.216495930845605	0.0412346905749039	2.61255058063271	0.0110622175613273	0.999463745446798	-2.7842192525483
u1Xwj6ggoQo70dpHH0	MALT1	MALT1 paracaspase	-0.111984845833543	0.0112973909517898	-2.60966790992167	0.0111470800835326	0.999463745446798	-2.78967698848619
omuSdql59eiOKGetic	AQP12B	aquaporin 12B	-0.183450466843282	0.00744244392124661	-2.60534832590246	0.0112753504617697	0.999463745446798	-2.79784644149839
QjnUDNORA4kqWa6i6k	NUTF2	nuclear transport factor 2	0.118592447993232	0.00548606145198793	2.60442142630771	0.011303048800623	0.999463745446798	-2.79959807561312
WtUSYleiehCBIlMgHk	CENPP	centromere protein P	0.121919049949721	-0.00165187582836637	2.60317281615896	0.0113404583708472	0.999463745446798	-2.8019569035756
f1LXRBe19Fy1deFSo4	PPP2R5A	protein phosphatase 2 regulatory subunit B'alpha	0.0961736031429682	0.034808321429369	2.60126929110246	0.0113977060828511	0.999463745446798	-2.80555127636337
6kt_fEKKrxTs0RcN9U	ABCD3	ATP binding cassette subfamily D member 3	-0.117196523548411	0.00497033815139643	-2.6008645675229	0.011409911727194	0.999463745446798	-2.80631524033913
6iq_of.H0cogfsEU6o	BBS9	Bardet-Biedl syndrome 9	-0.320130677346479	0.0348449758311483	-2.59756875542387	0.0115097491350837	0.999463745446798	-2.81253302771742
ruh5533FDVJYIOdW8U	LOC728024	chromosome X open reading frame 56 pseudogene	-0.17387056592058	0.0102846170720286	-2.5974096184569	0.0115145897405578	0.999463745446798	-2.81283309547833
WXVxXl7fe_Oefr_0qc	TMEM217	transmembrane protein 217	-0.179101684743881	0.0970463840588253	-2.59502469072209	0.0115873556945477	0.999463745446798	-2.81732838346425
953elfp1__quqHEjiM	SCARNA12	small Cajal body-specific RNA 12	0.19562971951368	0.0121656150146585	2.59376578633942	0.0116259337765943	0.999463745446798	-2.81969995994103
6iroOju.pnk6jeuVd8	LAPTM4B	lysosomal protein transmembrane 4 beta	0.123068210351409	-0.023240266367588	2.58775196932233	0.0118118343286079	0.999463745446798	-2.83101663730392
fwi.iBJelBIaiUf9Uk	ZNF28	zinc finger protein 28	-0.167467995979092	0.0345061384875495	-2.58398616839309	0.0119296115365972	0.999463745446798	-2.83809259073548
cnEBCdN.oHpHefntSU	YME1L1	YME1 like 1 ATPase	0.156534554650994	0.0186335052984555	2.58331890420707	0.0119505912019146	0.999463745446798	-2.83934554208399
E4UINIJUKrE.Pn8N5E	PHF3	PHD finger protein 3	-0.137525467491294	-0.0647601546254585	-2.58246095265023	0.0119776154625667	0.999463745446798	-2.84095618352695
coh750FNKAS_0ghNPo	GTF2H1	general transcription factor IIH subunit 1	-0.154870245153452	0.0131070765881212	-2.57450847923464	0.012230755129211	0.999463745446798	-2.85586551033121
ouCelRFzQJVedx7heg	CENPM	centromere protein M	0.135947005763403	0.023688047966956	2.57245954938096	0.0122967560540834	0.999463745446798	-2.85970101525185
012RuCR9VN5N9oR1Ck	PACS2	phosphofurin acidic cluster sorting protein 2	0.207431083959131	0.0265155439139054	2.56909956513011	0.0124056875561371	0.999463745446798	-2.86598557265229
WnupdNfR0vuAwFnX5U	ARL2	ADP ribosylation factor like GTPase 2	0.0952235432020047	0.00101087493077953	2.56093468578286	0.0126740447721414	0.999463745446798	-2.88123039872252
Qw2SUajq2K4Sn0qFEc	GMPR2	guanosine monophosphate reductase 2	-0.202745767167665	0.00477812630754686	-2.55495648327762	0.0128738508814424	0.999463745446798	-2.89236825082244
uCCrLAByI_qUpkunRk	RHBDL2	rhomboid like 2	-0.190897986102639	-0.0147267992591138	-2.55483729585676	0.0128778632217796	0.999463745446798	-2.89259009805158
rnnifqiSBSieMIhX9o	NOP9	NOP9 nucleolar protein	0.187469544365715	0.0062575792779941	2.55281441609708	0.0129461344084202	0.999463745446798	-2.8963541047737
fhJC1FcH7xEkTFEr3o	DCAF12	DDB1 and CUL4 associated factor 12	-0.0749083574057769	-0.0260852033116905	-2.54499421344269	0.0132131512538866	0.999463745446798	-2.91088320719088
oZAURF5QokEg19Shb0	NR2C2	nuclear receptor subfamily 2 group C member 2	-0.132153652969159	-0.0233178689323036	-2.54066414114559	0.0133631310107713	0.999463745446798	-2.91891290730128
9SC7oqqdeHIQ.VyV_4	NRK	Nik related kinase	-0.206517447308391	-0.00889905906339839	-2.54038803200122	0.0133727465065431	0.999463745446798	-2.91942455925276
E107BPrgo1KDOEQK6A	EIF4E	eukaryotic translation initiation factor 4E	-0.176330898016311	-0.0283809966855765	-2.54026447283019	0.013377051476527	0.999463745446798	-2.91965350990308
f.DpMKH5PPk8qJq054	VAMP4	vesicle associated membrane protein 4	-0.106372120335887	-0.00827955496537318	-2.53716282212311	0.0134855282253786	0.999463745446798	-2.9253978769111
H7cE1AHir6gCh9XXss	CYTIP	cytohesin 1 interacting protein	-0.156796778586427	0.047338311134954	-2.53336362062346	0.0136194833535247	0.999463745446798	-2.93242658245978
6JASaRjql.fNYiLiJk	GRB2	growth factor receptor bound protein 2	-0.147271967225234	-0.036566565555926	-2.53236616081189	0.0136548511165499	0.999463745446798	-2.93427055224588
cft9chVEi8AfqPVelU	R3HDM2	R3H domain containing 2	-0.15859838436356	-0.000557723012556	-2.53143040151846	0.0136881064828565	0.999463745446798	-2.93599993677268
Ko6Z6_kSN8BOiV_0js	GLE1	GLE1, RNA export mediator	0.106925248555893	0.0191636153349914	2.52919649663573	0.0137677916712556	0.999463745446798	-2.94012639246977
fod7SAqdHjfdyiet7o	SLFN12	schlafen family member 12	0.123777527131534	0.0191120181982943	2.5260949842684	0.0138791194174361	0.999463745446798	-2.94585071140781
KXuYrnnrLhQoroogqQ	JOSD2	Josephin domain containing 2	0.152711532941316	0.00263964399239533	2.52502248735925	0.0139178049702836	0.999463745446798	-2.94782887688007
HVJx_IjhioI0fiVKLw	TNFAIP8L1	TNF alpha induced protein 8 like 1	-0.198228946793306	0.0347035467962278	-2.52454302842404	0.0139351307705868	0.999463745446798	-2.9487129992807
o9cnRMlQCrmKiK6PFI	FERMT2	fermitin family member 2	-0.175475316938602	0.012808486395651	-2.5244251543147	0.0139393932667277	0.999463745446798	-2.94893033882299
6TheVd.HiE1UF3lX6g	AAAS	aladin WD repeat nucleoporin	0.142675253486191	-0.0218925276134611	2.52092158353991	0.0140666257920753	0.999463745446798	-2.95538665176806
ECCG5e.VfZfeW4_0v0	PMS2P4	PMS1 homolog 2, mismatch repair system component pseudogene 4	0.103234904975507	0.047871619816644	2.51990107804903	0.0141038820737596	0.999463745446798	-2.95726588452368
9niJ6n9d7hTVpewTN4	GAS6	growth arrest specific 6	0.201905365967529	-0.0767379599254434	2.51689505132046	0.0142141429394181	0.999463745446798	-2.96279789716123
iaGe9wAK3Xkje3qe44	SGK1	serum/glucocorticoid regulated kinase 1	-0.158094944785911	-0.0881879524331786	-2.51652852064799	0.0142276403006688	0.999463745446798	-2.96347206831916
6XRyEiidQF5U3TVORY	NA	NA	0.117522274546191	0.0164776351338948	2.51571673993415	0.0142575749931649	0.999463745446798	-2.96496492456258
Wk7h8kKneA4QIgYkUQ	ZWILCH	zwilch kinetochore protein	-0.140921122079324	0.0193425181790908	-2.51463084318729	0.0142977066092149	0.999463745446798	-2.96696128038022
6ld8g7V3fqH58jjqM4	PLS3	plastin 3	0.141336630083411	0.038042925038816	2.51412949014858	0.014316269520627	0.999463745446798	-2.96788275719719
fU_.EieJPrhKt4TrS0	GRM3	glutamate metabotropic receptor 3	0.180353688673032	0.05832516994165	2.51195414659024	0.0143970649367536	0.999463745446798	-2.97187930727379
Tiuh76h0KH_ee.1ztM	HSPA1B	heat shock protein family A (Hsp70) member 1B	-0.178560641036155	-0.0802280988294122	-2.51065188422733	0.0144456293337766	0.999463745446798	-2.97427051588808
Bc6IklhFV3xJbo79eg	P2RY8	P2Y receptor family member 8	0.0901326432399615	0.0378160370143609	2.50972824513254	0.0144801634473527	0.999463745446798	-2.97596590170611
xsk3bRlJHZdXFDh0Xg	BCAT2	branched chain amino acid transaminase 2	0.100183448001639	-0.00356975515823891	2.5058436433414	0.0146262216075413	0.999463745446798	-2.98309086188752
cKnPP14Ho7VwCQMB5U	STARD4	StAR related lipid transfer domain containing 4	-0.210238794841031	0.0257440352665107	-2.50464830454707	0.0146714318285636	0.999463745446798	-2.98528153469454
3aVeAhBJ1f3n2hFHQE	RMI2	RecQ mediated genome instability 2	0.108162817730082	0.0491647524462154	2.50432804680985	0.0146835660163646	0.999463745446798	-2.98586832343875
ivBIUrop0qIgj2I.os	PPFIBP1	PPFIA binding protein 1	-0.173713514885981	0.00483793607372369	-2.50316860898946	0.0147275714095078	0.999463745446798	-2.98799219216775
BodPXl_iAMfQUiSol4	RASGRP2	RAS guanyl releasing protein 2	0.223649585299969	-0.0626637087222933	2.50306103858241	0.0147316601622215	0.999463745446798	-2.98818920100336
Ng8fIJIqqXqIV6ofS4	ARNTL2	aryl hydrocarbon receptor nuclear translocator like 2	-0.202904372925336	-0.0109197510188228	-2.50144489673045	0.0147932129604825	0.999463745446798	-2.99114825929359
iC1DNjleeJZ_iSNnmg	RALY	RALY heterogeneous nuclear ribonucleoprotein	0.138626347286498	0.0411627268671676	2.50096219235715	0.0148116422439727	0.999463745446798	-2.99203176730083
odS7F6Sa56DN4aWI3w	HIST1H2AE	histone cluster 1 H2A family member e	0.182251340536627	0.0624049878661352	2.49935663271074	0.0148730901720133	0.999463745446798	-2.99496949505934
9KcIjuHEl5V4e77VKk	CTSK	cathepsin K	-0.218865559915269	-0.00972328648073618	-2.49765766358726	0.0149383630065102	0.999463745446798	-2.99807650254474
0k3LjKLLuiYgukgRck	BACH1	BTB domain and CNC homolog 1	-0.175565897315965	-0.00789598751513572	-2.49457463208266	0.0150574693768556	0.999463745446798	-3.00371033610371
3S0BfnysiCiRwMnHUg	HNRNPH2	heterogeneous nuclear ribonucleoprotein H2	-0.172385113736834	0.0532274684670569	-2.48817450413878	0.0153074583568112	0.999463745446798	-3.01538803723276
BIkCRNSiVS_0eS3qQU	SMG7	SMG7, nonsense mediated mRNA decay factor	0.133010749779313	-0.0461826470186582	2.48784522157434	0.0153204205851807	0.999463745446798	-3.01598820124251
lgVm5Be1YdyWXfSRlM	MT2A	metallothionein 2A	0.190913330254895	0.0490301278609965	2.48232871106088	0.0155390521298178	0.999463745446798	-3.02603340383607
0nXudzVXdK2.oy44Eg	VIRMA	vir like m6A methyltransferase associated	0.130379503885931	-0.00538544939847871	2.48051685604327	0.0156114698396325	0.999463745446798	-3.02932879236087
NJHXLd6XujUuc97RQU	MYO5C	myosin VC	0.147541167310244	0.0728061187992088	2.47990386725121	0.0156360389094756	0.999463745446798	-3.03044325716452
xUZ0v6FPooHy7RkQOo	CIAPIN1	cytokine induced apoptosis inhibitor 1	0.103534349127928	-0.00527211678704386	2.47934455457204	0.0156584869324084	0.999463745446798	-3.03145994251345
WUcRfeqeh_.SSf6_R4	ZNF689	zinc finger protein 689	-0.128863589429716	0.0330427622874404	-2.47799454511285	0.0157127890272056	0.999463745446798	-3.03391315530863
ZSdOqCUTITV.fV_RnY	DPF2	double PHD fingers 2	0.076172533796222	0.0279171071797489	2.47607410924326	0.0157903274397832	0.999463745446798	-3.03740109839582
NawJcR29S0Xx2U4CC0	ZNF669	zinc finger protein 669	-0.149835411106087	-0.0227704796608775	-2.47528357531591	0.0158223454084905	0.999463745446798	-3.03883625816034
WnqILjwqLgFJUe4ghQ	CRYM	crystallin mu	-0.210877569046276	-0.0178794483697961	-2.47486584578024	0.0158392877236727	0.999463745446798	-3.0395944694683
rojT1S4VferlBx4ooM	EFL1	elongation factor like GTPase 1	0.112588941440608	0.00428019519505898	2.46925164892334	0.0160685765939881	0.999463745446798	-3.04977474533768
EuYXY3tUJPTvV0Unss	LRCH3	leucine rich repeats and calponin homology domain containing 3	-0.16036281469707	0.0157772920056538	-2.46903458628279	0.0160775012158664	0.999463745446798	-3.05016797591696
fnf3SSBAovR6fJxLhk	IQCG	IQ motif containing G	0.197140932809072	0.00794566611856318	2.46676404610047	0.0161711227431818	0.999463745446798	-3.05427962808102
f5OhpkpWUh8KhetFGc	TYMP	thymidine phosphorylase	0.242235845139362	-0.0185382404776942	2.4641207382753	0.0162807314381521	0.999463745446798	-3.05906250070343
BSEehRSIv4onCNOyIs	METTL6	methyltransferase like 6	-0.13445232706598	0.0250088417868409	-2.46132314876813	0.0163974640967145	0.999463745446798	-3.06412006312961
Nh7uCW.u63U7K57vVo	KIAA0355	KIAA0355	-0.110950156852887	0.0291909121249603	-2.46053955929774	0.0164302947431317	0.999463745446798	-3.06553583377476
iroEcQAplTfRSYkaog	NCK2	NCK adaptor protein 2	-0.186047278621509	0.0104582820542094	-2.4597768546715	0.016462307035392	0.999463745446798	-3.06691352339043
QKHsvJqjjvC7pQmRpo	EMX2	empty spiracles homeobox 2	0.190852706614403	0.0469852056203718	2.45939012107487	0.0164785604336127	0.999463745446798	-3.067611957789
Hj7olL1C5SPIkqc5JU	ELF2	E74 like ETS transcription factor 2	-0.223323270075818	-0.0471807926904928	-2.45760416337163	0.0165538066092085	0.999463745446798	-3.07083622597426
Bl74eepWPeM4vK4U4g	NSD2	nuclear receptor binding SET domain protein 2	0.176359095698656	0.0160353102469593	2.45401897472727	0.016705789976436	0.999463745446798	-3.07730305729594
cUHqXO4CGXlo5ILOCE	GPM6A	glycoprotein M6A	0.236853753279419	-0.00932662172858815	2.45060950655224	0.0168514847555274	0.999463745446798	-3.08344590576803
rN4x5qeKl6Uen3kqO4	ELP6	elongator acetyltransferase complex subunit 6	0.106513863676562	0.0295368731380806	2.44993038799235	0.0168806409231676	0.999463745446798	-3.08466865715022
c_GGiCNf6OSIlJCimk	DNAJC3	DnaJ heat shock protein family (Hsp40) member C3	-0.119046726045042	-0.0974618944167753	-2.44700109019265	0.0170069219224466	0.999463745446798	-3.08993973336299
6kUIH1PcNyJ4Uv4nj0	MSMO1	methylsterol monooxygenase 1	-0.102396775161932	0.000353710505356752	-2.44455218987384	0.0171131427694543	0.999463745446798	-3.09434247955702
xHn.Lh2KUpLTmX3q3U	CCDC127	coiled-coil domain containing 127	0.0983228288892246	0.0121812440171387	2.44193003516615	0.0172275377590424	0.999463745446798	-3.09905278363959
9I08oQsukUlqIIWTuU	FAM98B	family with sequence similarity 98 member B	-0.199562847646948	0.0115118125649971	-2.44063383188798	0.0172843391968541	0.999463745446798	-3.10137971589343
lkTEtUuVJEWgv7Mel0	AMMECR1	Alport syndrome, mental retardation, midface hypoplasia and elliptocytosis chromosomal region gene 1	0.156214452545954	-0.0164231561511815	2.44035330873742	0.0172966541919089	0.999463745446798	-3.1018831777403
NICr.zoUOVS_0tIlvo	SGK1	serum/glucocorticoid regulated kinase 1	-0.158552757069079	-0.115669702258327	-2.44021405890711	0.0173027701947886	0.999463745446798	-3.10213307557886
HdIaisXqLRLrUIXZJc	ARMC10	armadillo repeat containing 10	-0.121449130299942	0.00966290359185473	-2.43708444317682	0.0174407387004	0.999463745446798	-3.10774646062956
TJsl33X8UI6aftXv2U	HDLBP	high density lipoprotein binding protein	-0.197155452419642	0.0684174801471936	-2.43544706572972	0.0175133143527563	0.999463745446798	-3.11068100711615
Tr_TUleITsoBF.SFSk	DDX42	DEAD-box helicase 42	0.0681019481161681	0.0161352391338774	2.43460832993641	0.0175505954783241	0.999463745446798	-3.11218359443968
iLk9fVfVLUwAVaFUl0	ZNF155	zinc finger protein 155	0.200141213105723	-0.0111095523225943	2.43353786312187	0.0175982801539611	0.999463745446798	-3.11410072056586
BVCReghOUjU7ksOXro	RPL28	ribosomal protein L28	-0.0960416070953054	0.0263361606805909	-2.43244949110166	0.0176468814120201	0.999463745446798	-3.11604921766891
ZILHe8Op0iO_qMCzHs	FAM174A	family with sequence similarity 174 member A	-0.200771225983535	-0.0244147660396542	-2.43142049308951	0.0176929418805082	0.999463745446798	-3.11789077283237
KWXpZVpWW4VGll1olY	KLHL5	kelch like family member 5	0.198658635801411	0.00804485907209636	2.43123087814309	0.0177014412517893	0.999463745446798	-3.11823005038527
BFEt1qiE9P9I4ISp_I	PPP4R1L	protein phosphatase 4 regulatory subunit 1 like (pseudogene)	-0.197910196413226	0.0475999673485748	-2.42856933626691	0.017821129792455	0.999463745446798	-3.12299009124293
rjl96N8JS_0uitdKnk	PRRX1	paired related homeobox 1	-0.189083145657064	-0.00239764350529791	-2.42768388606281	0.0178611085409507	0.999463745446798	-3.1245727454678
HXC4QR6gDoLHqryAYo	AIM2	absent in melanoma 2	-0.216610572128106	0.00533713009118022	-2.4249498274659	0.0179850607514995	0.999463745446798	-3.12945666743867
Qn_78f.p6JojiqUVbk	MTA1	metastasis associated 1	-0.082080465646669	0.00854399632070551	-2.42459947576325	0.0180009999629153	0.999463745446798	-3.1300821893314
QdqpwA7WUX0_kEkaU0	TUBB4B	tubulin beta 4B class IVb	0.120566886212083	0.0270619647285161	2.42123848624917	0.0181545516394111	0.999463745446798	-3.13607923381653
cq6SRE2tRXn7UgHvCI	UBE2D2	ubiquitin conjugating enzyme E2 D2	-0.153631634839839	-0.0150409993713181	-2.41539094138451	0.0184245015552092	0.999463745446798	-3.14649705793539
fn_7AxLo3Q32q7jgyY	HK2	hexokinase 2	-0.163587029994487	-0.0079761231179727	-2.4147502145526	0.0184542977385576	0.999463745446798	-3.14763732249703
QckkeqEoOHrV_KK24Q	TEDC1	tubulin epsilon and delta complex 1	0.117548121881017	0.0368434450709853	2.41220897381201	0.0185728998942347	0.999463745446798	-3.15215741470255
lOFICqUWq3DrhLUBR0	PXN	paxillin	-0.189222589709922	0.00281952091462987	-2.41149831711438	0.0186061886911704	0.999463745446798	-3.15342076799878
fLV5PmZhWmmoSn559c	MGST1	microsomal glutathione S-transferase 1	0.138630601472078	0.0213485983081174	2.40834628779324	0.0187544811257427	0.999463745446798	-3.15902058639489
9gjnHf10XnvtOXFOpY	ALDH6A1	aldehyde dehydrogenase 6 family member A1	0.100676516300752	0.0136147772905165	2.40829774496014	0.0187567731434469	0.999463745446798	-3.15910678009784
oVFD92hH3S7ugnTupU	MUC1	mucin 1, cell surface associated	0.245244396915278	-4.81181406542435e-05	2.40772079149993	0.0187840339927089	0.999463745446798	-3.16013112351864
61fbvFdezA1Bd6tb3Y	HOXC6	homeobox C6	-0.172070101859011	-0.0170807353399114	-2.40759085459458	0.0187901783514114	0.999463745446798	-3.16036179067116
l5cXJ5NzDtJ81wp7UY	MAPK6	mitogen-activated protein kinase 6	-0.0691231454903114	-0.00526579214300308	-2.40683746468105	0.0188258395159589	0.999463745446798	-3.16169902828831
ZJx7jlN91VNV93qqVE	SIPA1L3	signal induced proliferation associated 1 like 3	-0.171834800212385	0.0486672847366579	-2.40414235963238	0.0189539062671179	0.999463745446798	-3.16647996166374
orciW4.QnP9eA59Kj0	NUDCD1	NudC domain containing 1	-0.16887776326629	-0.00253431794660519	-2.40353418306818	0.0189829132404597	0.999463745446798	-3.16755822606065
0k7Im15X_A0h6u7t9U	VOPP1	VOPP1, WBP1/VOPP1 family member	0.127055515796095	0.0254415565123357	2.4016577246375	0.0190726611295201	0.999463745446798	-3.17088369411919
l6KU4uK4CXjv.VpS74	VPS33B	VPS33B, late endosome and lysosome associated	0.0820785269098557	-0.0106808891736125	2.40050241193091	0.0191281062381446	0.999463745446798	-3.17293009839292
K8VQgl6r1OXpI6UgIE	MREG	melanoregulin	-0.121904994856324	0.00287089086152671	-2.39970939377595	0.0191662476293209	0.999463745446798	-3.17433430908023
TBZcYhHQrd0pJ5In0E	DNAJC25-GNG10	DNAJC25-GNG10 readthrough	-0.208647994484068	0.0253653417517538	-2.39902883097524	0.019199034480839	0.999463745446798	-3.17553909348353
oOKaeeSVCBuOu1EpYg	TUBG1	tubulin gamma 1	0.124709911122704	-0.0143231132547598	2.39551597579149	0.0193690682667534	0.999463745446798	-3.18175341494257
rPYriqtCaIp2i2iAns	UBL5	ubiquitin like 5	0.122441478829376	-0.0113758082402756	2.39471578114459	0.0194079879218287	0.999463745446798	-3.1831679454121
6zEfenRKAu3ksqhUi0	RHOC	ras homolog family member C	-0.0836832138329127	-0.00576626661098633	-2.39309759470873	0.0194869063510776	0.999463745446798	-3.18602729590145
3XUgRPeAarjLgkPlzk	ST7L	suppression of tumorigenicity 7 like	-0.170441123401031	-0.0105307594832023	-2.39294667735467	0.0194942811315277	0.999463745446798	-3.18629388835879
EghEiHbF5nv7llnl3o	STIP1	stress induced phosphoprotein 1	0.121250405202429	0.0212763692586327	2.39270108968771	0.0195062874327599	0.999463745446798	-3.18672768486082
ifw9_pdQwu1TK7elKU	PVRIG	PVR related immunoglobulin domain containing	0.0965402831821528	-0.00140405152010027	2.3925951504891	0.0195114686314778	0.999463745446798	-3.18691480059163
ZkEjUBB9gpA7rpujkA	VAMP4	vesicle associated membrane protein 4	-0.130896406945467	-0.0201512616384339	-2.39042949657819	0.0196176545704231	0.999463745446798	-3.19073842643116
fX7oznu4Ftu4u6zl40	SGK1	serum/glucocorticoid regulated kinase 1	-0.135119387395924	-0.0953979516341113	-2.39040558912337	0.0196188296700549	0.999463745446798	-3.1907806211738
uF_JShglCEG4dULJKI	PAG1	phosphoprotein membrane anchor with glycosphingolipid microdomains 1	-0.135432881905529	-0.000250839331830956	-2.38843843704878	0.0197157347465337	0.999463745446798	-3.19425131353447
WeOWarqp5ewOEe4MBU	CTU1	cytosolic thiouridylase subunit 1	-0.167784928166548	0.0515172468547108	-2.38589159387953	0.0198418309303579	0.999463745446798	-3.19874132268161
o.pLollLfrl7p92zpw	TRO	trophinin	0.129389454205439	-0.00407017446536479	2.38385637024229	0.0199431133107008	0.999463745446798	-3.20232656506431
l7afEnfWi3Il7673tU	COBLL1	cordon-bleu WH2 repeat protein like 1	-0.231905960055077	0.0859288743112597	-2.38310246698457	0.0199807480482526	0.999463745446798	-3.2036540073491
QRLqiToqOr_l7n3nz0	TCL1B	T-cell leukemia/lymphoma 1B	0.200756363589032	0.00337198225117883	2.38262842375858	0.0200044446525693	0.999463745446798	-3.2044885087406
fhVf8JS4nqfS.9UpTk	SNX27	sorting nexin family member 27	-0.0885047632192096	0.0201467188646812	-2.38175369497863	0.0200482366690837	0.999463745446798	-3.20602801919844
BiJI_e9VkOODqRr_lg	DYNC1I2	dynein cytoplasmic 1 intermediate chain 2	0.0806446920067584	0.00508039526215961	2.37904631024695	0.0201843204406569	0.999463745446798	-3.21079006644995
BeO7_iQ6CK5f4Bequo	HACE1	HECT domain and ankyrin repeat containing E3 ubiquitin protein ligase 1	0.167294894310805	0.0248604973770797	2.37808225195654	0.0202329763524206	0.999463745446798	-3.21248469539284
QQtwGQicj4llPgh19U	AIG1	androgen induced 1	0.100743217372635	-0.0138938086683223	2.37664344501253	0.0203057873433602	0.999463745446798	-3.21501280210373
ufXxQuB1OlUCRSODvs	MERTK	MER proto-oncogene, tyrosine kinase	0.184936295932845	0.0246648274975038	2.37653772122252	0.0203111467122028	0.999463745446798	-3.21519851874946
ZnT7.1fzxEoSUqiiqo	SREBF2	sterol regulatory element binding transcription factor 2	0.216451371636091	-0.000534491957950331	2.37523879314027	0.0203770952269927	0.999463745446798	-3.2174796947152
WcpQXgJTp453JTSvf0	UBE2D2	ubiquitin conjugating enzyme E2 D2	0.132145331475141	0.0175301414501601	2.37362623623044	0.0204592327500693	0.999463745446798	-3.22031025328397
rGk_igqEnn6vcOded0	ATXN2L	ataxin 2 like	0.156747949253062	0.0519058278351389	2.3716648388785	0.0205595366566892	0.999463745446798	-3.22375103049261
i0CH1eKKGFUUHp5vnE	NCF4	neutrophil cytosolic factor 4	0.132149462268658	-0.0451745671854447	2.37051091372546	0.020618751828581	0.999463745446798	-3.22577421925906
TNtVNtdftXh_qR9RXg	LIF	LIF, interleukin 6 family cytokine	0.187681131869936	0.00743203408339217	2.36930188753684	0.0206809576088725	0.999463745446798	-3.22789315701733
Q77eIrigUCopBwJqAU	PPM1K	protein phosphatase, Mg2+/Mn2+ dependent 1K	0.23193277519236	0.0260093931954724	2.3686410454428	0.0207150293374362	0.999463745446798	-3.22905097586154
ZHdUeJCbe61zrNBSzc	ARHGAP24	Rho GTPase activating protein 24	-0.225151565051502	0.0333823194772656	-2.36862261964016	0.0207159800522667	0.999463745446798	-3.22908325475263
9VKiAI1OKE._E0yFqI	TUBG1	tubulin gamma 1	0.211764900057399	0.0390686882524331	2.36685521385863	0.0208073537010612	0.999463745446798	-3.23217849990365
c7t3l_38ih9JtQh6pU	PLLP	plasmolipin	0.183806754668116	0.0230448598673854	2.36488319286411	0.0209097295373787	0.999463745446798	-3.23562986368278
95TfnP9P9Xugjk6_TU	IMPAD1	inositol monophosphatase domain containing 1	-0.12715461826017	-0.0203872169650735	-2.36056472779475	0.0211354878052912	0.999463745446798	-3.24317970066666
fXQoRQDRu4ogjrtDpU	ASTN2	astrotactin 2	-0.193094928991287	-0.0371787085035537	-2.36037793907759	0.0211453014315451	0.999463745446798	-3.24350600357297
Wb5ZJrqCgKSOwOO768	NCOR2	nuclear receptor corepressor 2	-0.0998733909676633	-0.00503192342007334	-2.35994833810732	0.0211678874847523	0.999463745446798	-3.24425639746683
ZkINSxfkTILJBU1flw	PPP1R3C	protein phosphatase 1 regulatory subunit 3C	0.258292459480943	0.0243922596932601	2.35986060934665	0.0211725024204389	0.999463745446798	-3.24440962160822
QjkdF2l1QLnqPEpuJQ	TRIM16L	tripartite motif containing 16 like	0.341807986085515	0.0372123535518392	2.35901120592851	0.0212172312931257	0.999463745446798	-3.24589292107143
Nb5O.qOunXvt_Z3qC0	STX1A	syntaxin 1A	0.162783388367395	-0.0144547737272362	2.35744980089079	0.0212996731099077	0.999463745446798	-3.24861844060241
faItNLz3dd5XVMUULU	ZNF470	zinc finger protein 470	-0.165778779472345	-0.0198745617343976	-2.35738574383342	0.0213030613892003	0.999463745446798	-3.24873022431378
uxxktPfRxdl4tsXXU4	MRPL39	mitochondrial ribosomal protein L39	-0.218824341680066	0.0118334013996061	-2.35683644515807	0.0213321360875227	0.999463745446798	-3.2496886842633
W36eilK6EF7TR4feAI	FBXO22	F-box protein 22	-0.101979864177041	0.0405226505669137	-2.35652314197969	0.0213487352228967	0.999463745446798	-3.25023527886898
EMkr3rjrEQgs3AXfX0	SLTM	SAFB like transcription modulator	-0.195538050255926	0.00592482687730591	-2.35621413126678	0.021365118200921	0.999463745446798	-3.25077432664756
THp8GLRJdJ7nqGFft0	SDC4	syndecan 4	-0.17020154644197	-0.0120057721028451	-2.35583524069922	0.021385221308331	0.999463745446798	-3.25143519622209
3l1Hl3oPnQvT44V3hU	BAX	BCL2 associated X, apoptosis regulator	0.11880686480778	0.0144321004663435	2.35474872738529	0.0214429627406532	0.999463745446798	-3.25332983628725
NX7vQT0lJVJTrcY8c4	LOC728715	ovostatin homolog 2	0.141180204922122	-0.0305608709108627	2.35422204943297	0.0214710023063291	0.999463745446798	-3.25424798985486
fa6RI64H79KC7iRqXo	WDR4	WD repeat domain 4	0.185716069422815	0.0399537862411206	2.35193207155935	0.0215932971558057	0.999463745446798	-3.25823813984595
xp.pD390lxFdH77o04	ATAD2	ATPase family, AAA domain containing 2	0.114252775721889	0.0130200670164743	2.35059943579364	0.0216647507117919	0.999463745446798	-3.26055871781204
o1UcwS_eWWgsSFIJV4	SCNM1	sodium channel modifier 1	0.0811035176734641	0.0380459971503002	2.34945919659746	0.0217260552361214	0.999463745446798	-3.26254341371986
xKf56fuaTXnW3kr7n0	ATP5I	ATP synthase, H+ transporting, mitochondrial Fo complex subunit E	-0.0842213169630135	0.0337728870849014	-2.34745887649192	0.0218339746188861	0.999463745446798	-3.26602326115452
NXwliuqozqj0pD78RE	STIM2	stromal interaction molecule 2	-0.146343519517963	-0.0174280687072823	-2.34537022967021	0.0219471679516391	0.999463745446798	-3.26965417892478
ERLUpQAhKpAldEJSgo	PROCA1	protein interacting with cyclin A1	0.165159682256062	0.0403638844289637	2.34380241965311	0.0220324773511771	0.999463745446798	-3.27237793326705
6fr4ZX0kR8ecd7FVJU	LY6G5C	lymphocyte antigen 6 family member G5C	0.216611099269109	0.0479769834880189	2.34168311651789	0.0221482638475745	0.999463745446798	-3.27605742676852
xpCIQrn0DPU0rL7i5E	BCLAF3	BCLAF1 and THRAP3 family member 3	0.165468422329692	-0.0318412832031722	2.34120599829605	0.0221744053206837	0.999463745446798	-3.27688541456461
BK3v6RVHnhSXVIgLuQ	HSD17B10	hydroxysteroid 17-beta dehydrogenase 10	0.11805342255201	0.0274387481118668	2.34084129839042	0.0221944058485041	0.999463745446798	-3.2775182192229
0mdQzboXnv7QIfpfbo	CNNM2	cyclin and CBS domain divalent metal cation transport mediator 2	-0.155816678450899	-0.049024847067527	-2.33905202930544	0.0222927637815704	0.999463745446798	-3.28062167851518
uEJ6JKUGOGZkX3E02I	TRAPPC5	trafficking protein particle complex 5	0.0691977384301169	-0.00359277387031662	2.3361297870874	0.0224542356599106	0.999463745446798	-3.28568608243929
rnkFXTzUUZEjrEnqng	TICAM1	toll like receptor adaptor molecule 1	0.14260009389304	0.00448031721515787	2.3358066924062	0.0224721522854875	0.999463745446798	-3.28624570456625
9GdZrvqj.ceTdhJN2o	LBR	lamin B receptor	0.197460529261721	-0.0277539250428124	2.33537461563709	0.0224961321665412	0.999463745446798	-3.28699399201223
Wh6ZKQiR00IyO4EAVo	TADA2A	transcriptional adaptor 2A	0.116406474715392	0.0240414907593792	2.33421260055892	0.0225607358184547	0.999463745446798	-3.2890058523443
Bl1ZGRZkl57lbq1Yuc	SPG21	SPG21, maspardin	0.131988455841983	0.0460035314830587	2.33259364670445	0.0226510183332472	0.999463745446798	-3.29180746745515
fIoOHk4NxeL56T6ilI	IMMP2L	inner mitochondrial membrane peptidase subunit 2	0.103707808956232	-0.00763495058661885	2.33167547026031	0.0227023638252789	0.999463745446798	-3.29339567234058
lgq1V54eiJ6gzpP6Ec	FBXO32	F-box protein 32	-0.162877847720837	-0.0347164826196128	-2.33029691196551	0.0227796485477539	0.999463745446798	-3.29577925440931
QGOF966I4gH02f1KVE	ERCC6	ERCC excision repair 6, chromatin remodeling factor	-0.144788152357293	0.0325509743921575	-2.33013669695648	0.0227886456596708	0.999463745446798	-3.29605619753452
Zop4h2p4v5oitLBwPo	TPM1	tropomyosin 1	-0.158083569582013	0.0674254592126881	-2.32859013441794	0.022875657580272	0.999463745446798	-3.29872873857813
rshPVZ9UdQLWUIJs1Y	RMRP	RNA component of mitochondrial RNA processing endoribonuclease	0.189853596594672	0.0326767464805018	2.32815906999554	0.0228999624261884	0.999463745446798	-3.29947338104488
0pKUnb.3d4N6evyiiU	CWC25	CWC25 spliceosome associated protein homolog	-0.104726131368181	0.0302165293688283	-2.32796108053349	0.0229111334133634	0.999463745446798	-3.29981536013845
iSSAoAoqt4gkmFQol0	LENG1	leukocyte receptor cluster member 1	0.145185004284093	-0.0422549935708039	2.3276453839234	0.022928955697867	0.999463745446798	-3.30036060060702
K76IhCgIo4VQ4oeu5I	TRIM24	tripartite motif containing 24	-0.130603034132191	-0.0216826371853719	-2.32225407950503	0.0232352213900452	0.999463745446798	-3.309662566639
Z0EKEefiCOoqCUIVLo	CREB3L4	cAMP responsive element binding protein 3 like 4	0.203322330996642	0.0703486858132755	2.32190148364281	0.0232553773385982	0.999463745446798	-3.31027030596423
uk9YN7ipUASD8qurgI	RSF1	remodeling and spacing factor 1	-0.162324704593257	-0.0667719626357255	-2.31976915225351	0.0233776018889216	0.999463745446798	-3.31394400757069
9eh8FGDFfi7UD6goH4	AQR	aquarius intron-binding spliceosomal factor	-0.169793243361083	-0.018573543926808	-2.31431163368545	0.0236930250976554	0.999463745446798	-3.32333389231471
fRKs3KKpqghOjLMoIQ	HMGXB4	HMG-box containing 4	-0.257296305886173	-6.67667511333736e-05	-2.31051836396849	0.0239144790266626	0.999463745446798	-3.32984965184846
xV6LUhxH0g9KSd9F3o	TTC39B	tetratricopeptide repeat domain 39B	0.127105743318205	0.0158542859538743	2.31003030917139	0.0239431048687837	0.999463745446798	-3.33068735264917
34Kf76KoSJEoEl_Et4	ELMSAN1	ELM2 and Myb/SANT domain containing 1	-0.102644739534402	-0.0206736440067756	-2.3100094673134	0.0239443279807723	0.999463745446798	-3.3307231225227
QiuS1UlVFXSt7vH6.8	C20orf27	chromosome 20 open reading frame 27	0.0960460708278197	0.0299849497541012	2.30994021147444	0.0239483926826256	0.999463745446798	-3.33084198106382
KVcFKlKJIe1Tsees3g	FBXO38	F-box protein 38	0.16722986153446	0.0517174499557709	2.30882970060434	0.0240136533897865	0.999463745446798	-3.33274746595273
ZSn0AUvS7NamGrLrrk	LARP4B	La ribonucleoprotein domain family member 4B	-0.0917989760363454	-0.0167916591495285	-2.30745431183476	0.0240946985055734	0.999463745446798	-3.33510639932193
0k6v.eSfPuDF_ve9DI	RIF1	replication timing regulatory factor 1	0.0861464512291932	-0.0109534024597971	2.30178952742136	0.0244310583567744	0.999463745446798	-3.34480988115289
xEc16kDv8V7XUl1efU	MPDU1	mannose-P-dolichol utilization defect 1	0.139811682997095	-0.0279039568913567	2.30083555638712	0.0244881100452661	0.999463745446798	-3.34644205014161
KYI6SeeKKJYJUAJ4K4	ADK	adenosine kinase	0.15169137354529	0.0434875102061832	2.29988657919156	0.0245449801329527	0.999463745446798	-3.34806512161519
c7pNH5EfP_yA6sP7lY	RBBP6	RB binding protein 6, ubiquitin ligase	0.177240172416035	0.0373956891506587	2.29840492170453	0.0246340064711516	0.999463745446798	-3.350598152227
3VXrR0jrIAOn4WcWEg	ZRANB1	zinc finger RANBP2-type containing 1	-0.122396747829431	-0.0132084865607962	-2.29630244546142	0.0247608258617547	0.999463745446798	-3.35419021896953
9Gea4jsksNJ1SYbuyc	RREB1	ras responsive element binding protein 1	0.13937804843879	-0.0445720481874608	2.29071049456056	0.0251009446357607	0.999463745446798	-3.36373082457981
iXSU6IU7Tkg8EKyRYk	PANX2	pannexin 2	-0.206163050892121	0.0665215666265124	-2.28830196805145	0.0252487076880401	0.999463745446798	-3.36783416943067
6S5_kXoLK6SO8GV9dU	TPP1	tripeptidyl peptidase 1	0.0842811927007525	-0.0317250597059606	2.28815589485665	0.0252576939780355	0.999463745446798	-3.36808291588632
oD3yl.3Qkqj0Uf3yXU	NA	NA	0.227473849836181	0.0355984796542437	2.28505378520003	0.0254492022133784	0.999463745446798	-3.37336236604778
iZLD3TtVMJIntEu5HE	TBPL1	TATA-box binding protein like 1	-0.073286916029193	-0.00235736279945719	-2.28314340021561	0.0255677775028131	0.999463745446798	-3.37661068559678
fgB4n1rRIgbkhj1VlM	BABAM1	BRISC and BRCA1 A complex member 1	0.105138937260407	0.0133637686467601	2.28248702624678	0.025608630466027	0.999463745446798	-3.37772623128986
ZqKJpxpLGaIIKUIJeQ	EEF1D	eukaryotic translation elongation factor 1 delta	0.0824885237068191	-0.00370542840361918	2.28226003008438	0.0256227722195072	0.999463745446798	-3.37811196272137
HDfg6QMFQyXmxSITe4	ZNF608	zinc finger protein 608	0.126126560951763	0.0101627553483926	2.28079746560042	0.0257140549868514	0.999463745446798	-3.3805965173538
3uvtxXh3UnlHe4Vc7g	OR2B6	olfactory receptor family 2 subfamily B member 6	-0.185965149231908	-0.014290853520309	-2.28075637865894	0.0257166234853095	0.999463745446798	-3.38066629542119
HaFSBPdSy5PS9BEkLk	SEPHS1	selenophosphate synthetase 1	0.132218194610615	0.0257515131481302	2.27977153098546	0.0257782579167482	0.999463745446798	-3.38233855373895
BOoiqyjsSqy.v8gUls	TNC	tenascin C	-0.164493988077041	-0.000958717700397531	-2.27956816475841	0.0257910013802969	0.999463745446798	-3.38268379245961
Nlb98V1OfntedEXF54	CAPN11	calpain 11	-0.19339364552729	0.0179168992532516	-2.27823443768568	0.0258747143427539	0.999463745446798	-3.38494732348633
HfpDRJWSBTTu6SCXio	USP22	ubiquitin specific peptidase 22	0.118220942571972	-0.000250051778627698	2.27806710053898	0.0258852343963537	0.999463745446798	-3.38523124183054
oe6IJ3eGo1kL_WeOS4	TALDO1	transaldolase 1	0.0728350641055912	0.00410257517559045	2.27454888163931	0.0261072927375257	0.999463745446798	-3.39119655171818
3mICpKigaKiu6uJ4zA	WRAP53	WD repeat containing antisense to TP53	0.144193182822507	0.0238610911429911	2.27320661399432	0.0261924548094918	0.999463745446798	-3.39347041906069
Zr5EWiIBXEDuiDukCU	ZNF91	zinc finger protein 91	-0.225027493501761	-0.0570979068553606	-2.27302905902701	0.0262037383963843	0.999463745446798	-3.3937711226349
HTF49VhHoxYI4FQU9E	TDO2	tryptophan 2,3-dioxygenase	-0.208461735901862	-0.0488122634512517	-2.27178767909983	0.0262827479136165	0.999463745446798	-3.39587295545432
EpdJfAf_9cdUV0mB6k	SLC9A3R1	SLC9A3 regulator 1	0.0792650236425104	0.0124622236597979	2.27112638358473	0.0263249229275815	0.999463745446798	-3.39699223444989
WgA1K5aKJIKOIDHolo	DBP	D-box binding PAR bZIP transcription factor	0.11231837750026	-0.0478042350416792	2.27075182701244	0.0263488372874362	0.999463745446798	-3.39762607224396
BH7oTTo_3BFNEtXp0o	FANCD2	Fanconi anemia complementation group D2	0.0933809977411644	0.0279516505287332	2.2701359528355	0.0263882007994771	0.999463745446798	-3.3986680878198
9Rqu0oqIhJerOpCA4c	MADD	MAP kinase activating death domain	-0.123062974261461	-0.0277903246124311	-2.27009188072971	0.0263910196523435	0.999463745446798	-3.39874264572601
Q35dRFdd1KFejg1ve4	RRP7A	ribosomal RNA processing 7 homolog A	0.0925827844938036	-0.0381970995412645	2.27007235056929	0.0263922688868766	0.999463745446798	-3.39877568501325
EgX.UL43NS4bpeupv0	TMEM158	transmembrane protein 158 (gene/pseudogene)	0.259484306471598	-0.000909111564431587	2.26939679783547	0.0264355123566038	0.999463745446798	-3.39991837652504
HrxQBRbkLajhJKh96U	FAM83H	family with sequence similarity 83 member H	-0.154770746449185	-0.0529281220915227	-2.26902234455239	0.0264595087991425	0.999463745446798	-3.40055163952211
0Sm4lFOVpSffDgM.1w	C1orf210	chromosome 1 open reading frame 210	0.232015889183489	-0.00953339229762078	2.26836679245602	0.0265015654829387	0.999463745446798	-3.40166007894345
oelKRQk7u5H7F66.d4	SLBP	stem-loop binding protein	0.0813605304810221	0.0523394197287973	2.26696201427793	0.0265918873051657	0.999463745446798	-3.40403445206154
ZrdJSVyIeffu.u097U	CAMLG	calcium modulating ligand	-0.0709469348218164	-0.000578029106859113	-2.26335335899132	0.0268251569652783	0.999463745446798	-3.4101282525432
xnUO7kn_Byp6r7q5d8	TMEM9B	TMEM9 domain family member B	0.0781937942755346	-0.00991887937952141	2.26186877325455	0.0269216463099223	0.999463745446798	-3.41263287806638
uUK90R6Xqfq5UzKK3s	IFI35	interferon induced protein 35	0.0871759884658181	-0.00371460237607552	2.26137060948915	0.0269540925922435	0.999463745446798	-3.41347301812753
ir_h054gFRKAke1Kyg	MFAP1	microfibril associated protein 1	0.0759150743642464	0.0122272583380484	2.26120458931252	0.0269649134425682	0.999463745446798	-3.41375297265454
cSKJU.rLikrOqcgkes	CYP2D6	cytochrome P450 family 2 subfamily D member 6	0.195887356532041	0.01754857742865	2.25818742514046	0.0271622349156395	0.999463745446798	-3.41883774716509
NpZXkX0mj_qPKd.ysE	HAGH	hydroxyacylglutathione hydrolase	-0.0778299580350534	-0.0172486942100758	-2.2575364485853	0.0272049752525908	0.999463745446798	-3.41993408723018
xz1S1tKD.sgqfTuesU	PNPO	pyridoxamine 5'-phosphate oxidase	0.0874587380925909	0.00306267579072074	2.2565347951547	0.0272708554113022	0.999463745446798	-3.42162050581678
9XRKqfeMV0BOiBLCok	SERP1	stress associated endoplasmic reticulum protein 1	0.102718556163646	-0.0430853801800835	2.25528726796141	0.0273531037843687	0.999463745446798	-3.42372001659359
6d17u7XqUdxS4.SHVk	JAML	junction adhesion molecule like	0.16961780811592	0.124001242408319	2.25359813455674	0.0274648154896862	0.999463745446798	-3.42656118567462
6LvpAYh.delXl56I0k	BLCAP	bladder cancer associated protein	0.0917621328615655	0.0107789307640922	2.25143768041104	0.0276082844875652	0.999463745446798	-3.4301925503236
BQkv9UU1PE1Kqj9faQ	TANK	TRAF family member associated NFKB activator	-0.0916393465451669	-0.00724133843634643	-2.25090620523388	0.0276436791971109	0.999463745446798	-3.43108542804096
NxWZ57yEdZT1693WBY	RAB40C	RAB40C, member RAS oncogene family	-0.0908527607739715	0.00456731508872296	-2.25023218588654	0.027688624469386	0.999463745446798	-3.43221752769585
B91yrztS_q.8KSRIeU	UNG	uracil DNA glycosylase	0.106886748939108	0.0299821178327806	2.2486285412626	0.027795818500262	0.999463745446798	-3.43490991549477
9cXeUALqp7Hqh52jjc	CERS2	ceramide synthase 2	-0.112913952073277	0.00184744919758775	-2.24668963884718	0.0279259108475456	0.999463745446798	-3.43816304118914
W.1bt6Hu7fH3ArkbH0	TRGV3	T cell receptor gamma variable 3	-0.0788633866564343	0.0139181425246324	-2.24421741350156	0.0280925650074651	0.999463745446798	-3.44230759847302
cdWKlAegEwi4edrqOg	PRPSAP2	phosphoribosyl pyrophosphate synthetase associated protein 2	-0.149810158319217	-0.0277546712865609	-2.24168569310569	0.0282641372533065	0.999463745446798	-3.44654795888979
WXuPXrpSzXo9dwjfl0	NSF	N-ethylmaleimide sensitive factor, vesicle fusing ATPase	-0.0745263218112851	-0.0063803178727396	-2.23970057044398	0.0283993119960316	0.999463745446798	-3.44987003842221
NOZsFtdX_tKnMVBehc	TFG	TRK-fused gene	-0.0802664542578757	0.0070819892004216	-2.2389309688553	0.0284518701150851	0.999463745446798	-3.45115729813501
6k8l5O.crfeULn.dL4	TMTC2	transmembrane and tetratricopeptide repeat containing 2	0.187290195330815	0.0348653840429159	2.2365042689734	0.0286181570894655	0.999463745446798	-3.45521385832114
ZJwknhL6KgJSXqp6ig	CCHCR1	coiled-coil alpha-helical rod protein 1	-0.187578654272379	0.00728859462634434	-2.23620918502863	0.0286384356288244	0.999463745446798	-3.45570688139132
ZdIDrSOtKJSc5JLMU0	ZDHHC17	zinc finger DHHC-type containing 17	0.106626165894359	-0.00322997212784223	2.23551949483632	0.0286858813464184	0.999463745446798	-3.45685899682171
f5_h7f4HeRdfUpTfuI	RNF217	ring finger protein 217	0.412679370855806	0.0648299496397297	2.23542890569548	0.0286921183650592	0.999463745446798	-3.45701030238744
TtwU8I81AtKepkunRk	PRRG4	proline rich and Gla domain 4	-0.185445975373112	-0.00804457142623486	-2.23172027712691	0.028948482527732	0.999463745446798	-3.46320021093497
Bt9OVtPqCYRgqCSdxE	TFIP11	tuftelin interacting protein 11	0.0940838747364811	0.0350389084210797	2.23156386724746	0.0289593387391414	0.999463745446798	-3.4634610793783
WXEf5cPiUcUr.eknuk	USP37	ubiquitin specific peptidase 37	-0.127075010385008	-0.0143494084441214	-2.22983763722381	0.0290793923303594	0.999463745446798	-3.46633916137269
BZnicSh1Yu4lmvXe_Q	EIF3B	eukaryotic translation initiation factor 3 subunit B	0.110439996020591	-0.000242453417758768	2.22973147525791	0.0290867898157981	0.999463745446798	-3.46651610078672
Ng5.RokD3l0fdRoqVU	TP53I3	tumor protein p53 inducible protein 3	0.103359426648063	-0.00100587411778592	2.22842917121106	0.0291776706412677	0.999463745446798	-3.46868606981251
TCZCVZ9wtFGa96ApH4	BUD23	BUD23, rRNA methyltransferase and ribosome maturation factor	0.0787663418222857	0.00909316308512334	2.22811284912353	0.0291997827339699	0.999463745446798	-3.46921298296138
TPXO9LJuvjnPvyX1XU	YTHDC1	YTH domain containing 1	0.0686408874630907	0.00543808900378936	2.22763138851936	0.0292334669165461	0.999463745446798	-3.47001485556077
iKKgVb_bmVB1QukAKA	PCLAF	PCNA clamp associated factor	0.0786251099213502	0.00952707906358578	2.22594405597347	0.0293517868367383	0.999463745446798	-3.47282396578577
xHJLRIF7XVKe9eKXhQ	ITGA10	integrin subunit alpha 10	-0.169524325808977	0.0383509587630498	-2.22464025804162	0.0294435005998221	0.999463745446798	-3.47499334137231
uuVMyuJNX8jTqBSSHk	KCTD3	potassium channel tetramerization domain containing 3	-0.107467941808115	-0.00210302222489028	-2.2242214575185	0.0294730139361086	0.999463745446798	-3.47568995387493
KU7r4Pkh7qKSruInh0	SP140	SP140 nuclear body protein	0.109694863136164	-0.0969859630646843	2.22255785766099	0.0295905067007143	0.999463745446798	-3.47845602330975
NjWn5UgIghJToLoJV8	LBHD1	LBH domain containing 1	0.106380519908032	0.0164699398163114	2.22251682714844	0.0295934097017626	0.999463745446798	-3.47852422294281
9Lh4IuqX.n.l6Myq50	VAMP4	vesicle associated membrane protein 4	0.150637919584996	-0.0075508632833767	2.22195174753819	0.0296334158317719	0.999463745446798	-3.47946337356614
rSm3mA0zp7JPbnNXqo	COX6C	cytochrome c oxidase subunit 6C	0.070365311080513	0.00471571941744395	2.22060378486344	0.029729040025017	0.999463745446798	-3.48170285384361
3nh56kokFE04SA5Kjc	PAXIP1-AS2	PAXIP1 antisense RNA 2	-0.17365381982911	0.00538235133514333	-2.220246628905	0.0297544220036239	0.999463745446798	-3.48229603581754
QbnSiZelHleQCeggng	TPM3	tropomyosin 3	0.107319909396429	0.00517585689407622	2.21938059635485	0.0298160473837836	0.999463745446798	-3.48373405361778
QB76KIJ4KKeIViSL_U	TPM2	tropomyosin 2	-0.168431055373939	-0.0358472147920703	-2.21880526511298	0.0298570489481581	0.999463745446798	-3.48468911244495
6d3ulupJFtzxSpA7eE	NCR3	natural cytotoxicity triggering receptor 3	0.111873990315787	0.00714896120727395	2.21556345502734	0.0300890072902495	0.999463745446798	-3.49006669738089
K6bnLqOkjigghVG.ig	TAF13	TATA-box binding protein associated factor 13	-0.181018536838091	0.0266738919955347	-2.21519859347819	0.030115212766675	0.999463745446798	-3.49067152591842
HT_qKSnqUCrInqwwO0	TRIM41	tripartite motif containing 41	0.1501104381098	0.0139777957130171	2.21169024498079	0.0303682181473999	0.999463745446798	-3.49648303773372
6d3q3oKIEp4qieIong	DERL3	derlin 3	0.164522570127236	-0.00808260502426525	2.21073802274085	0.030437209155375	0.999463745446798	-3.49805904538153
WVSu6rJC7n1tCMUz3U	CADPS2	calcium dependent secretion activator 2	-0.175712471420881	0.0176999613371367	-2.21066367873601	0.0304426013618494	0.999463745446798	-3.49818206703346
KUK7wqjLF1Q9CSIB4U	HHEX	hematopoietically expressed homeobox	-0.157593229764914	-0.020964979901039	-2.20907144066355	0.0305582886891255	0.999463745446798	-3.50081601096773
WJLHpIFIDlnoJG0B50	SNX20	sorting nexin 20	0.153485963455253	-0.031103235051714	2.20885836440402	0.0305737994280789	0.999463745446798	-3.50116836968837
finSkqVEpJY937nj8A	SDCBP2	syndecan binding protein 2	-0.257075493522899	-0.0242816992618006	-2.20809398058957	0.0306294991067062	0.999463745446798	-3.50243217730452
cXUDd_ftPh35u0P1dI	INTS6	integrator complex subunit 6	-0.0713236592409808	-0.0145417518948891	-2.2079130201448	0.0306426984983043	0.999463745446798	-3.50273131785544
HNDNKeVR1G9VJE1Sus	SGSM3	small G protein signaling modulator 3	0.140359087977819	0.00705121938280365	2.2077394621432	0.0306553626409331	0.999463745446798	-3.50301820234806
05Fewg6HwCx56EpO7k	WAC	WW domain containing adaptor with coiled-coil	-0.0835415558557167	-0.0102338429474729	-2.20727563151627	0.0306892298827395	0.999463745446798	-3.50378480328222
B3e9dIvsrdSM7VS51E	ZNF20	zinc finger protein 20	-0.10007361127519	0.0294062904751863	-2.20618184859603	0.0307692240440274	0.999463745446798	-3.5055920302306
fUpHTp93p69H3V6dIQ	PARVB	parvin beta	-0.156394873911798	0.0212318164204338	-2.2048898263088	0.0308639522250161	0.999463745446798	-3.50772583570463
Qt_Bx7ty6kDtPvF3u4	AGL	amylo-alpha-1, 6-glucosidase, 4-alpha-glucanotransferase	0.0678284706822465	-0.0171440574459403	2.2048102283591	0.030869796528975	0.999463745446798	-3.50785725935706
rpJwpdSpqt1MwcRr04	TBC1D10A	TBC1 domain family member 10A	-0.124054229625407	-0.0339664907493932	-2.20346902709082	0.0309684174220311	0.999463745446798	-3.51007111003353
03FVHFl.P3c.V_X00U	AGO3	argonaute 3, RISC catalytic component	-0.123195394499546	-0.0141567818697834	-2.20318976193793	0.0309889870214862	0.999463745446798	-3.51053193637425
3mlSZXSo06VKyS7UV4	GTF2IRD2B	GTF2I repeat domain containing 2B	0.115381512893365	0.0312110312296365	2.20139822199885	0.0311212303310316	0.999463745446798	-3.51348706184579
ZnfAAeVPYool_SKuAk	CFAP69	cilia and flagella associated protein 69	-0.147381133786888	0.00449990155477027	-2.20131452575629	0.03112742049269	0.999463745446798	-3.51362506860284
lpTe6eir3g7Xd1O0pI	PLBD2	phospholipase B domain containing 2	-0.147912496765422	5.58349568739475e-05	-2.20092009185497	0.0311566073072656	0.999463745446798	-3.51427539154834
Qh7SBT3kHizgNEhS4o	UNC13C	unc-13 homolog C	0.173564349964016	-0.0407666489449609	2.20015994898484	0.0312129231062895	0.999463745446798	-3.51552840157818
EU4osUop8Y4uXoorks	NHP2	NHP2 ribonucleoprotein	0.0865097626364442	0.022252802013754	2.20004258296637	0.031221626215225	0.999463745446798	-3.5157218339124
3ruDUjOa3w9f6AxEvY	RABGEF1	RAB guanine nucleotide exchange factor 1	-0.1763839419635	0.00108436947684726	-2.19974274068718	0.0312438702558471	0.999463745446798	-3.51621596825293
HGe4B.QNffS0vUOK6o	FCGR3B	Fc fragment of IgG receptor IIIb	0.143182079104992	-0.034947466903882	2.19813037293773	0.0313637235594671	0.999463745446798	-3.51887215083866
6ur92ermG4P7gnSjlQ	DNAJC12	DnaJ heat shock protein family (Hsp40) member C12	-0.266866849247546	-0.0896093644936004	-2.19714314034449	0.0314373070907952	0.999463745446798	-3.52049769173557
NlPiS10ivOh3QmHDoM	SMIM13	small integral membrane protein 13	0.160891524554538	0.0190578098485003	2.19490945922324	0.0316043538219209	0.999463745446798	-3.52417332732794
TLR.4ldNCd0_46ioxc	CLDN12	claudin 12	-0.109211870180113	-0.0188275324074265	-2.19436033952524	0.0316455389322473	0.999463745446798	-3.52507645113837
oJ1.tndOntI161dRHo	AGPAT3	1-acylglycerol-3-phosphate O-acyltransferase 3	-0.133951619988062	0.0241322448841474	-2.19427560038492	0.0316518987313492	0.999463745446798	-3.52521580264748
cbfiOkT1xj4IKrfiNU	NCK2	NCK adaptor protein 2	-0.075559383782309	-0.0114084798855985	-2.19194367186936	0.0318273536627561	0.999463745446798	-3.5290488309579
oPRapQuuzt91CeCpbo	MIA	melanoma inhibitory activity	-0.181484956019106	-0.0522738824625026	-2.19133046781952	0.0318736326125492	0.999463745446798	-3.53005619600729
laDrQERISKKUxIVvQg	VRK1	vaccinia related kinase 1	0.085964102605505	0.0234155306406235	2.19125154419408	0.031879593316718	0.999463745446798	-3.53018583370131
iVuivpNStGUijhj780	BCL11A	B-cell CLL/lymphoma 11A	-0.147645074487454	-0.0302516314049246	-2.19123786747229	0.0318806263499779	0.999463745446798	-3.53020829829544
cSMehONxSpphciC7BY	SULT1A3	sulfotransferase family 1A member 3	0.167086410597611	-0.023825367680406	2.19118609018421	0.0318845374696312	0.999463745446798	-3.53029334361478
WwAVaCpoRdRNl.5Rf0	SLC38A1	solute carrier family 38 member 1	-0.172502897866547	0.0293608390279162	-2.19075394720942	0.0319171968124701	0.999463745446798	-3.53100308200169
Ql4eUJTqyXq7AF6I64	DDB1	damage specific DNA binding protein 1	-0.0553315080563501	0.0143747293251542	-2.19069544199444	0.0319216206150181	0.999463745446798	-3.5310991601387
3CgKpeK5Se7Xq8qvqo	SLC43A1	solute carrier family 43 member 1	0.247846650402852	-0.00280296768437398	2.19046060463267	0.0319393829713509	0.999463745446798	-3.53148479187167
x1_3nnP4LDyxJ5I3d4	DENND4A	DENN domain containing 4A	-0.14470555376273	-0.0276982510700895	-2.1892552303885	0.0320306900525949	0.999463745446798	-3.53346361755356
fuQ43TnShL5kqHXqIw	PAPD5	poly(A) RNA polymerase D5, non-canonical	-0.168262618005129	0.0108248505155425	-2.18865421470538	0.0320763023698544	0.999463745446798	-3.53444994456888
933K44v3H13r.xBKA4	IDS	iduronate 2-sulfatase	0.120876880533094	-0.0405580212444698	2.18751337808143	0.0321630393586158	0.999463745446798	-3.53632154598685
9n5XXlFfVfsjHl8EdU	FAM219A	family with sequence similarity 219 member A	0.159243615108323	-0.00677539334162513	2.18555160615189	0.0323126719657961	0.999463745446798	-3.53953801650997
xx5u5Nhh511JB5O5pQ	EHMT1	euchromatic histone lysine methyltransferase 1	0.180541630719185	-0.0579233071586031	2.18354164754293	0.0324666119812688	0.999463745446798	-3.54283097648909
EJF7X6oWN5buFKoIC8	HIVEP3	human immunodeficiency virus type I enhancer binding protein 3	-0.120577519659438	-0.0618292719294554	-2.18272771762132	0.0325291322269709	0.999463745446798	-3.54416373129314
91Z.tRpirdZ6xlpeSA	TSPO	translocator protein	0.151043655369098	0.0291568187116989	2.18112503227283	0.0326525472010612	0.999463745446798	-3.54678679773482
oq.teU5_rvTUvQofUU	TATDN3	TatD DNase domain containing 3	0.114000147920911	0.0556235801163068	2.17952813721385	0.0327759237916214	0.999463745446798	-3.54939877526976
TWd_i.ctHRULQM7pEo	GSTCD	glutathione S-transferase C-terminal domain containing	-0.217515779106671	-0.0167455804294946	-2.17902320633704	0.0328150197188696	0.999463745446798	-3.55022433560759
okB2FVvXlSMOnQwd4o	INPP5B	inositol polyphosphate-5-phosphatase B	0.109305465444929	0.023588295894804	2.17898443724142	0.0328180232297073	0.999463745446798	-3.55028771629874
NotSc_ee_tU8JBxSP8	PMPCB	peptidase, mitochondrial processing beta subunit	0.0591482474887159	0.00943009597254352	2.17853074347524	0.0328531895805656	0.999463745446798	-3.55102935572783
NuhfT1PnqWXvXUYQJE	SOS1	SOS Ras/Rac guanine nucleotide exchange factor 1	-0.125702386320495	-0.0010555224233362	-2.17795141584815	0.032898141903832	0.999463745446798	-3.5519761760732
lTbc59X5XdSdRdFSJE	PILRA	paired immunoglobin like type 2 receptor alpha	-0.141776004804676	-0.00935273032834217	-2.17736700473404	0.0329435432045336	0.999463745446798	-3.55293108983597
BkRIko5TnroT4IfhSE	SCHIP1	schwannomin interacting protein 1	-0.14517915425074	0.0370572090655476	-2.17687094238612	0.0329821239451743	0.999463745446798	-3.55374147456899
BdKoJdIjxEvKOeES3I	KCNH8	potassium voltage-gated channel subfamily H member 8	0.15573611291391	-0.0316127435607868	2.17532745356759	0.0331024202109335	0.999463745446798	-3.55626197733018
xCvKwREyp7xoeILtXk	ZNF256	zinc finger protein 256	0.106429737758825	0.0309288575545035	2.17394587283149	0.0332104231096084	0.999463745446798	-3.55851680889806
c4p14g0FQeCT9D0fg4	NLK	nemo like kinase	-0.108953685506834	-0.0357112536798323	-2.17274755777213	0.0333043490086165	0.999463745446798	-3.56047156162671
HRSSf1Sfd7irR55UeQ	GAMT	guanidinoacetate N-methyltransferase	0.0941456128229939	-0.066447480802655	2.17266302769654	0.0333109833791733	0.999463745446798	-3.56060941712411
QZekFCzTFvUeUUAoKs	TMEM126B	transmembrane protein 126B	-0.0772762947127216	-0.00621422529974462	-2.17063498753493	0.0334705016953445	0.999463745446798	-3.56391548268059
6AguibteCi9RSlqCVM	C21orf33	chromosome 21 open reading frame 33	0.0955100368999693	-0.00575331188809289	2.16995757403548	0.0335239332260619	0.999463745446798	-3.56501920733848
cktZAXXgupJQS.4iJQ	LCMT1	leucine carboxyl methyltransferase 1	0.0805909665387792	0.0220601751555439	2.16658982723739	0.0337906754758902	0.999463745446798	-3.57050204041286
3oXlB1FR65dXgv8bl8	PCOLCE	procollagen C-endopeptidase enhancer	-0.174175830280585	0.0184291604351235	-2.16555397447915	0.0338730923696547	0.999463745446798	-3.57218700825549
BVjSWxZEiAhDlkdnYg	ELOA3B	elongin A3 family member B	-0.170304050059278	0.0220823384304557	-2.16531293078418	0.0338922960210904	0.999463745446798	-3.57257900404222
QToPpb6nxdefbhfXXk	COX8A	cytochrome c oxidase subunit 8A	0.0600713383484612	0.0201835952326213	2.16527443961004	0.0338953634459467	0.999463745446798	-3.57264159666363
9oNerotQRDRGiFFN4k	TMEM266	transmembrane protein 266	0.19153555538864	-0.00607229166761638	2.16440333625923	0.0339648480118946	0.999463745446798	-3.57405789491898
9op4popKPn4zioj4p4	ZNF526	zinc finger protein 526	-0.111692536965739	-0.00561644541546033	-2.16425448619626	0.033976733653722	0.999463745446798	-3.57429985724691
ZqjigghBw5Rn9R7u8E	DNAL1	dynein axonemal light chain 1	-0.108380726180417	-0.0598469778452117	-2.16360775261348	0.0340284173891764	0.999463745446798	-3.57535098815082
Z_e5D76oqyqgKYiiMc	PIK3R3	phosphoinositide-3-kinase regulatory subunit 3	0.173514077150003	-0.0252432988831986	2.16356949535584	0.0340314768701868	0.999463745446798	-3.57541315906257
EXpXhIkcSTQLA3_qEs	HMGXB4	HMG-box containing 4	-0.0989595960048457	0.00872609331017951	-2.16345955210739	0.0340402705080328	0.999463745446798	-3.57559181992125
xVkl.VQiRUESQgJUeA	ALG3	ALG3, alpha-1,3- mannosyltransferase	-0.0752869260153371	0.0496300069782407	-2.16336765778198	0.0340476220544412	0.999463745446798	-3.57574114489789
fAqn9O2.X15155EnlI	DHCR7	7-dehydrocholesterol reductase	0.0964878528653602	-0.0257898618109374	2.16336462828777	0.0340478644376105	0.999463745446798	-3.575746067626
od1UtXAK77i63RJUco	ZNF671	zinc finger protein 671	-0.100149024299279	0.00103832224628117	-2.16305179346311	0.034072901782059	0.999463745446798	-3.5762543722571
cXoBg.A67QHkiQSp9I	WASHC4	WASH complex subunit 4	0.145824638594621	-0.0496707247451183	2.16238556879502	0.0341262758582533	0.999463745446798	-3.5773366700018
HWMBKUeCd2VewfMVRU	RNPS1	RNA binding protein with serine rich domain 1	0.14163123137584	0.0117208773318945	2.16227192084948	0.0341353879657453	0.999463745446798	-3.57752126569265
E1FtUR.Kq_s3bnfdSI	CSNK2A1	casein kinase 2 alpha 1	0.0880267941179186	0.0230461562206865	2.16209523783723	0.0341495583437383	0.999463745446798	-3.57780823150602
fde6NpO4kkuEi6kJfE	TBC1D23	TBC1 domain family member 23	-0.114840946029115	0.00069877512902327	-2.16001880953011	0.0343164781021996	0.999463745446798	-3.58117925124687
3fFSV60IN7ik7h4LHA	GRAMD2B	GRAM domain containing 2B	-0.0784701484754135	0.0399970672180843	-2.15909309557992	0.0343911237242001	0.999463745446798	-3.58268123922741
HPuot1m1Z2eoiKxd18	MATR3	matrin 3	0.134888352420016	-0.0479506430748508	2.15789219820864	0.0344881702543881	0.999463745446798	-3.58462890740583
BSU33sKuVLuH2vjXnk	PIAS2	protein inhibitor of activated STAT 2	-0.0750487382979738	-0.0176708404830276	-2.15738978190795	0.0345288422624307	0.999463745446798	-3.58544347678596
cohpUKQJELEVNdLA2I	DHX29	DExH-box helicase 29	-0.101570622426451	0.0116606956092379	-2.15626046209475	0.0346204167843502	0.999463745446798	-3.58727386241487
6.MIEAperlxW7qpHuo	IP6K2	inositol hexakisphosphate kinase 2	-0.197508522768463	-0.0237817949504595	-2.15600764785388	0.0346409460646841	0.999463745446798	-3.58768350928401
lVNSvgOoigfsdJPSTQ	PRMT9	protein arginine methyltransferase 9	-0.114955699568082	0.00978809222699953	-2.15570417920549	0.03466560267213	0.999463745446798	-3.58817518030554
T4a1IoAqWo24WomGmg	SNRNP70	small nuclear ribonucleoprotein U1 subunit 70	0.146271912943337	0.049477234242302	2.15518207571065	0.034708059061877	0.999463745446798	-3.58902094029008
T1FEoOzRB8FvVv7yHI	KL	klotho	-0.132220885915542	0.0280615385679583	-2.15297813061511	0.0348877800429885	0.999463745446798	-3.59258922260175
uuuOTlzL.Jx_oq6XiU	ZNF562	zinc finger protein 562	-0.127771486231925	-0.00300623716525555	-2.15178375014885	0.0349855149134411	0.999463745446798	-3.59452168712874
cR4NJTsmje0vxJdgok	GMCL1	germ cell-less, spermatogenesis associated 1	-0.0994400439785934	0.00639759641031871	-2.15092037548488	0.0350563126483497	0.999463745446798	-3.59591803179208
rk_eIEBUXiRVIRfXQU	LST1	leukocyte specific transcript 1	0.166705955034828	-0.0115040698222615	2.14908569912445	0.0352071734931183	0.999463745446798	-3.59888369955826
9ChS7dUoN5KLeCKKC0	NBPF14	NBPF member 14	-0.152730418775753	0.0224475783375841	-2.14817251588303	0.0352824731713044	0.999463745446798	-3.60035901953751
653hNrk1mB2M9J6eo4	HSD17B6	hydroxysteroid 17-beta dehydrogenase 6	-0.163484689855423	-0.0327752902693406	-2.14554871082588	0.0354996103793662	0.999463745446798	-3.60459503356603
BqejF0EIeIl.VZ93UI	SLCO5A1	solute carrier organic anion transporter family member 5A1	-0.113355785038673	0.0503326940731381	-2.14491335379287	0.0355523653244203	0.999463745446798	-3.60562012990414
KUknUYwCoFeJIETkQE	LINC00158	long intergenic non-protein coding RNA 158	-0.140804244139553	-0.0297797294391993	-2.14435903405981	0.035598447415135	0.999463745446798	-3.60651426937859
HIlrmmlmH1WGapniCQ	SPAG1	sperm associated antigen 1	-0.162752423334656	-0.0184366762302843	-2.14429605321079	0.0356036864763457	0.999463745446798	-3.60661584758636
xpwegAnqts9wucCCnk	PDE8A	phosphodiesterase 8A	0.141544347098078	-0.0222705184789626	2.14409333149466	0.0356205544454213	0.999463745446798	-3.60694278870073
fmEsnX95cs3kgR6fwE	RAP1A	RAP1A, member of RAS oncogene family	-0.126679256737957	0.00320758164895671	-2.14305265566693	0.0357072562425247	0.999463745446798	-3.60862073534414
9pf09n02ULseIUV6EU	FICD	FIC domain containing	-0.156179773339084	-0.0678939580453622	-2.14027783277572	0.0359393349559353	0.999463745446798	-3.61309138477615
upZTAWUjQXoncZdcb8	FTH1P7	ferritin heavy chain 1 pseudogene 7	0.0604014728243543	0.012570562015549	2.13836749586557	0.036099873565725	0.999463745446798	-3.61616636875706
0vH1Sj_d5VAYnvTBJg	EVC	EvC ciliary complex subunit 1	-0.181511857921859	0.0438416213290701	-2.13789740896161	0.036139473850213	0.999463745446798	-3.61692269007173
x2L9WFOI4dRORxTeKU	SNORD33	small nucleolar RNA, C/D box 33	0.118957424662165	0.01402965540891	2.1373410946408	0.0361863868648031	0.999463745446798	-3.61781756040914
fXnlVdRS5f_SIjP_7E	SNTA1	syntrophin alpha 1	-0.0898234329454231	-0.00998131243939914	-2.13638624090482	0.0362670317229887	0.999463745446798	-3.61935304918606
lJJoXqe97vgou5UuV8	AP3D1	adaptor related protein complex 3 delta 1 subunit	-0.0959208928932634	0.00274894643436487	-2.1347076985703	0.036409177364149	0.999463745446798	-3.62205088346264
ZuvNCp66pLoo_KIz60	GTPBP10	GTP binding protein 10	-0.217111413509725	0.028544302083538	-2.1340905384801	0.0364615628299264	0.999463745446798	-3.62304236108824
of0kyHwdXwlSE3viF4	HMGN2	high mobility group nucleosomal binding domain 2	0.072108205926453	0.0211426090828251	2.13351337167625	0.0365106130037875	0.999463745446798	-3.62396936895915
TSJ6GC3nCIjop7podc	KIAA1328	KIAA1328	0.115213661985681	-0.0130959707648071	2.13264138066289	0.0365848276435035	0.999463745446798	-3.62536950117456
cF6IuCGpOGkrgqv57g	ZSCAN2	zinc finger and SCAN domain containing 2	-0.103127442897908	-0.0456750791887515	-2.13174185410501	0.0366615234553431	0.999463745446798	-3.62681333795355
3iiiDugisAJ6kQvTOU	NAA50	N(alpha)-acetyltransferase 50, NatE catalytic subunit	-0.120630200097396	-0.000162127840671405	-2.13018767460376	0.0367943665376055	0.999463745446798	-3.62930674581261
cXSqSp_6d67yvSqfSE	CCDC184	coiled-coil domain containing 184	0.153026548809742	-0.0477283203150636	2.12850857878989	0.0369383576162082	0.999463745446798	-3.63199882650787
c0eXxdXRr77ih4u7oI	TMEM173	transmembrane protein 173	-0.109153140772557	-0.0221603438053205	-2.12843904423053	0.0369443311245457	0.999463745446798	-3.63211027187001
NeJernR7prVbXpzgF8	NKG7	natural killer cell granule protein 7	-0.160669423556395	-0.0241963626677674	-2.12672268281261	0.0370920454487966	0.999463745446798	-3.63486016245811
QV17p3xfvdX5Is6k6I	TRMT10B	tRNA methyltransferase 10B	-0.0910125084886193	-0.00107804130052129	-2.1248183865129	0.037256535213777	0.999463745446798	-3.63790895211486
o3kq6E6Oz2.eNOIIp0	CAPS2	calcyphosine 2	0.118546447576707	-0.041103928787413	2.12456575577455	0.0372784046329844	0.999463745446798	-3.6383132412478
fR1MSzyuKOjmpntflo	EHD1	EH domain containing 1	-0.0704724263403989	-0.00119314226566316	-2.1239446856329	0.0373322161420278	0.999463745446798	-3.63930697654325
9ezChdEkHfVHhtFuE4	CENPO	centromere protein O	-0.128820064791977	0.021711375397187	-2.12289891382289	0.0374229778860976	0.999463745446798	-3.64097969290029
lvrv31_lf_hw7x7UL0	PTPRO	protein tyrosine phosphatase, receptor type O	-0.205776736557137	-0.0153191223094217	-2.12271539997911	0.0374389246979097	0.999463745446798	-3.64127315191137
rjovhekON7pwTlt3eU	SEPT6	septin 6	0.111681932454426	-0.0105363022180676	2.12087797687776	0.0375989175374174	0.999463745446798	-3.6442102076417
iqpSh3saSlIAinv7CM	BAG4	BCL2 associated athanogene 4	-0.137952831616011	0.0179978893762874	-2.11907035702948	0.0377568952470475	0.999463745446798	-3.64709751567688
ZgI5e7.Xe6pW5H16Ig	PIEZO2	piezo type mechanosensitive ion channel component 2	-0.132623903422006	-0.0135601126575783	-2.11825508535058	0.0378283349409757	0.999463745446798	-3.64839906325728
iop4knku.e1ooDo3yk	PHLPP1	PH domain and leucine rich repeat protein phosphatase 1	0.161562984133564	0.0570810828252701	2.11823637003734	0.0378299762841627	0.999463745446798	-3.64842893648533
WoI0roEkWp7QvEQw0E	SPECC1	sperm antigen with calponin homology and coiled-coil domains 1	0.158728482908882	0.0078522847496672	2.11745198370966	0.0378988231022402	0.999463745446798	-3.64968076574991
ue4H06SATF57z4EFXo	TTC30B	tetratricopeptide repeat domain 30B	-0.169671708904995	0.0183291448594186	-2.11704469441759	0.0379346144724395	0.999463745446798	-3.65033061739672
lRupI54_hSGll40ol8	SIVA1	SIVA1 apoptosis inducing factor	0.0894762497660339	0.0243826161462264	2.11688207334039	0.0379489133358102	0.999463745446798	-3.65059005826189
i0UleI_KVTEUuCKJKI	MON1A	MON1 homolog A, secretory trafficking associated	-0.182527602403348	-0.0557467914781536	-2.116775727029	0.0379582666341428	0.999463745446798	-3.65075971086645
oKtUJLUiCO3u6f1dXk	UBQLN4	ubiquilin 4	-0.0687906382492754	0.010769557820632	-2.11653077784217	0.0379798178632221	0.999463745446798	-3.65115044690714
0VTluKu6Ho4EK46Rv0	NDUFV1	NADH:ubiquinone oxidoreductase core subunit V1	0.0840731600166409	-0.00317957674162184	2.11577022762915	0.0380468007378657	0.999463745446798	-3.6523634102291
NIuXXu9Suf7kzP93jU	C1orf52	chromosome 1 open reading frame 52	-0.0843116796226495	0.0187417188636717	-2.11215548594654	0.0383665625710913	0.999463745446798	-3.65812331254745
36U54eVFuSkIBN7Un4	SCNM1	sodium channel modifier 1	0.0842309297740518	0.024798447848421	2.11210464598265	0.0383710765027084	0.999463745446798	-3.65820426364555
o_hXSPe8FAPkg6qlKU	SUV39H2	suppressor of variegation 3-9 homolog 2	0.160948135945878	0.0255445096611948	2.11198733443263	0.0383814940129499	0.999463745446798	-3.65839104932611
6tzuVVEks6f1JxVP6Y	WNK1	WNK lysine deficient protein kinase 1	0.141084379295581	0.0163607973362164	2.11192441350918	0.0383870825346617	0.999463745446798	-3.65849122958083
BS6WEpPo5IFyJS.0oE	LONRF1	LON peptidase N-terminal domain and ring finger 1	-0.0907985153023361	0.0261307699118811	-2.11171689785585	0.0384055187083194	0.999463745446798	-3.65882160996434
QefpFMnwXkv30A5UOU	SPATS2	spermatogenesis associated serine rich 2	0.0997355559248744	0.0251491984905303	2.11125117530923	0.0384469225944661	0.999463745446798	-3.65956297442533
iXGj5VRV0URFUjjgcc	ALAS1	5'-aminolevulinate synthase 1	0.12228604128556	-0.0123431765781614	2.10943584257771	0.03860868058893	0.999463745446798	-3.6624513994989
E6.xf9ai3UnpXT_7Wg	UGP2	UDP-glucose pyrophosphorylase 2	-0.153920730496503	-0.0246786012665692	-2.10928151939111	0.0386224590185871	0.999463745446798	-3.66269684979806
3K3u6_30akNKCoiJ6o	TIMM10B	translocase of inner mitochondrial membrane 10B	-0.110480515027801	0.0145736743193734	-2.10913705103943	0.0386353614502763	0.999463745446798	-3.66292661218028
rla5l9zxP5cE3_hukg	MRPL3	mitochondrial ribosomal protein L3	-0.0686058317636403	0.00856600069637381	-2.10908871348941	0.0386396793004345	0.999463745446798	-3.66300348520155
cT7lNEBdvUll_VMcj0	IDNK	IDNK, gluconokinase	0.0747118322079786	-0.0258517617451499	2.10871548664004	0.0386730326651119	0.999463745446798	-3.66359699139653
BGzdU5lC6JVSUIJSUQ	EEF1D	eukaryotic translation elongation factor 1 delta	0.0953936574495181	0.0100443300658226	2.10861391899029	0.0386821135714178	0.999463745446798	-3.66375848903403
r7V4sijnnObi9OhEL4	UHMK1	U2AF homology motif kinase 1	-0.152948834903292	0.0146189851215828	-2.10782461119211	0.0387527467281469	0.999463745446798	-3.66501330222724
ZhFLh3iSqEgSh6fuCk	MFSD6L	major facilitator superfamily domain containing 6 like	-0.157806826965842	0.0122467303543562	-2.10663574222368	0.0388593470287056	0.999463745446798	-3.66690256863956
QeUV54t73rDarMMp3k	JAG1	jagged 1	-0.128428092382656	0.0588365004230725	-2.10573349007639	0.0389404176193524	0.999463745446798	-3.66833575823449
0VUoQQHlfCLT9fvNEo	C2CD5	C2 calcium dependent domain containing 5	0.0692291124518554	0.0206987971780553	2.10375852066575	0.039118388436653	0.999463745446798	-3.6714710894228
ZrKqxxyoze6Tjzk9bI	GPM6A	glycoprotein M6A	-0.264570191096103	0.0352988747138057	-2.10169948748123	0.0393046859469705	0.999463745446798	-3.67473720654979
oKnieZ_bp79OFn7.3U	ITPR3	inositol 1,4,5-trisphosphate receptor type 3	-0.084243689571802	-0.00134034830847435	-2.10153675179523	0.0393194427527556	0.999463745446798	-3.67499522793377
uYHTnoIByARTxL1Jd8	DCAF6	DDB1 and CUL4 associated factor 6	0.117747899098248	0.00172890600205433	2.10144308587856	0.039327938520133	0.999463745446798	-3.67514372980192
um0iUnihKfl6H3sIyg	ACKR3	atypical chemokine receptor 3	0.174912229289664	0.0979317351731363	2.10125684741831	0.0393448356161575	0.999463745446798	-3.67543898330462
0Uvp50qIjnc3px2zYE	ANKRA2	ankyrin repeat family A member 2	0.12613152862026	0.0498011315838921	2.10094694213384	0.0393729667566525	0.999463745446798	-3.67593024282656
EXn1P3VRdHdFC0Uiro	SLC16A2	solute carrier family 16 member 2	-0.182476692237293	0.0185264365303218	-2.10022172459027	0.0394388654100586	0.999463745446798	-3.67707961091013
6o5bRRSRGgcXVFV._w	CPSF1	cleavage and polyadenylation specific factor 1	0.0823536237233164	0.0108004934085865	2.09882529288873	0.0395660251900126	0.999463745446798	-3.67929180676512
0t_uvX27qn42755e8E	BPHL	biphenyl hydrolase like	-0.0825270176439421	-0.00740792506020289	-2.098587416796	0.039587721730966	0.999463745446798	-3.67966851973893
9kYHoe7kGf.qIOO1W8	LDLR	low density lipoprotein receptor	-0.0739795295729038	-0.030196492671178	-2.09856165240332	0.0395900723057961	0.999463745446798	-3.67970931938906
QuRIVe73mrgQeVHBSE	SLC29A3	solute carrier family 29 member 3	-0.15804569812379	-0.00730478184096934	-2.09826020836265	0.0396175830882003	0.999463745446798	-3.68018664459664
6qd3g1xev30p96H5yk	BCDIN3D	BCDIN3 domain containing RNA methyltransferase	0.0832181217194937	0.00262873710783797	2.0970724682905	0.0397261416679643	0.999463745446798	-3.68206681704165
Wq4r_VHt3koKdafDco	CSRNP2	cysteine and serine rich nuclear protein 2	-0.0942616778405772	0.00109498981195388	-2.09568452109171	0.0398533259094171	0.999463745446798	-3.68426276386551
fif7nggv.rqfy4e5.k	ELK4	ELK4, ETS transcription factor	-0.11299954951472	-0.0538888760302705	-2.09476059372396	0.0399381854614364	0.999463745446798	-3.6857238722801
rn2nrSofrRK.9AqcZc	SNRNP35	small nuclear ribonucleoprotein U11/U12 subunit 35	0.0871739292480031	0.0332961953516072	2.09429991436714	0.039980555792455	0.999463745446798	-3.68645219013087
o8b_qwUlwug36CgLCo	PTP4A1	protein tyrosine phosphatase type IVA, member 1	-0.127406382894182	-0.0597980345506826	-2.09273616743078	0.040124670065716	0.999463745446798	-3.68892339983636
oQkJ1QqOuV73cUJzXo	IL16	interleukin 16	-0.16777911098059	0.0332024697651412	-2.09207923174762	0.0401853472157232	0.999463745446798	-3.689961094117
KWT26oiJsiv1qSw9zU	HIST1H3G	histone cluster 1 H3 family member g	0.138678875778368	0.146423700226764	2.09098847755756	0.0402862692438447	0.999463745446798	-3.69168343324109
EJDfpf3J7uFUpa0NXU	LINC00173	long intergenic non-protein coding RNA 173	-0.20333070912502	-0.0611264269023773	-2.0903097867089	0.0403491759409008	0.999463745446798	-3.69275472302853
NG_Lp56Od7GoK14aOI	PYCARD	PYD and CARD domain containing	0.0805789223008635	-0.0267632957910411	2.08922504244609	0.0404498958346925	0.999463745446798	-3.69446633758205
HunnrG7jf4AX6fyV3o	FGFR1OP	FGFR1 oncogene partner	-0.0745048720199132	0.00087211478883677	-2.08912558495673	0.0404591414862204	0.999463745446798	-3.69462323328592
Bohqovgi7pWT7Xr1Qw	CYP27A1	cytochrome P450 family 27 subfamily A member 1	0.153393925283497	0.0209748439674404	2.08898024011581	0.0404726561584604	0.999463745446798	-3.69485250551815
WeFGdFdNS1MeM._QoE	FILIP1L	filamin A interacting protein 1 like	-0.113136571859466	0.0108208215468929	-2.08854892506914	0.0405127843766423	0.999463745446798	-3.69553279737636
Q0YrlfiXqo5JLhe9QI	TMEM8B	transmembrane protein 8B	0.169028120307678	0.0220361674177391	2.08758612766573	0.040602484479475	0.999463745446798	-3.69705093736018
0hLjntvRWEBHh9xNro	H2AFY	H2A histone family member Y	-0.0916709945474354	-0.0924602958082282	-2.08611625945273	0.0407397583242697	0.999463745446798	-3.69936747428105
ToJIPCSKI647Z_kERU	NGLY1	N-glycanase 1	-0.0865629439066607	-0.0465291295236348	-2.08605130394573	0.0407458339115792	0.999463745446798	-3.69946981309857
xI93L.dXKjqCqk_KQk	TOB2	transducer of ERBB2, 2	0.124639698248607	0.00591326351843226	2.08487439965398	0.0408560512233194	0.999463745446798	-3.70132358005904
cSv15J2cXC797KoKJQ	CLUAP1	clusterin associated protein 1	-0.138528465458284	-0.0127759803169954	-2.08414939061429	0.0409240769382345	0.999463745446798	-3.70246511238423
liLkAfgEIgLpeXpNd4	CRYZL1	crystallin zeta like 1	0.150732966174714	0.0181602296535258	2.08338130334786	0.0409962515763767	0.999463745446798	-3.70367410168048
9IUULEquOg7YAF.ogU	DENND4A	DENN domain containing 4A	-0.117117259168923	-0.00150553317708761	-2.08203985385064	0.0411225676099129	0.999463745446798	-3.70578466475844
K.qs6qi794Xn_SG5dY	RIPK4	receptor interacting serine/threonine kinase 4	-0.156491605334476	0.00603982462286144	-2.08059949335751	0.0412585725855599	0.999463745446798	-3.70804955553972
uEReUHkXN_F56kXq30	CTSC	cathepsin C	0.117062994832927	0.0645869637461597	2.08009367235939	0.0413064266754294	0.999463745446798	-3.70884461447914
W16p67dKJKre7cSOp4	LMAN2	lectin, mannose binding 2	0.14945294535148	-0.00777146145398035	2.07763877791143	0.04153935946098	0.999463745446798	-3.71270091604731
36WqcXUjtVHfQJQjrI	ABCC6P2	ATP binding cassette subfamily C member 6 pseudogene 2	0.157864432171556	-0.00465665971626621	2.07752054231768	0.0415506068928335	0.999463745446798	-3.71288654961559
Wu5eo99Lr9KSMviHqk	LRIG2	leucine rich repeats and immunoglobulin like domains 2	0.127674851901643	-0.0157175663642048	2.07736225253559	0.0415656686977302	0.999463745446798	-3.71313505536428
66tPLp1v__7e.1XX14	SYT15	synaptotagmin 15	0.103838754602771	-0.0185631590294616	2.07690017205774	0.0416096642442531	0.999463745446798	-3.71386040219563
KIuUiBb5.1i_d99SnU	SERF1B	small EDRK-rich factor 1B	0.0940951117163916	0.0158010197592234	2.07619101589069	0.0416772627181617	0.999463745446798	-3.71497332551769
oIYpYSpSJQpSJ4JSzg	MAGEF1	MAGE family member F1	0.1238408329073	0.00501661480213251	2.07548637054681	0.0417445253226196	0.999463745446798	-3.71607884771011
WeiwnEo3Aklf.Ety8o	CAST	calpastatin	-0.0907854017368202	-0.0124405001616188	-2.07512811330685	0.0417787591211058	0.999463745446798	-3.71664079648468
ZSoLr4Vda6elHeci1M	WASH7P	WAS protein family homolog 7 pseudogene	0.133749735729105	0.0404092356177892	2.07251563279898	0.0420291337961766	0.999463745446798	-3.72073612512057
TknkvTonb9AqQjcAek	RBM26	RNA binding motif protein 26	-0.084316624218905	0.013721600840399	-2.07044662621635	0.0422283430857026	0.999463745446798	-3.72397636988827
0SecnSEUCqwpUoT0zc	PLEKHA7	pleckstrin homology domain containing A7	-0.183041041323184	0.0380597481455393	-2.06839893111009	0.042426303936537	0.999463745446798	-3.72718051077131
9Zjdp0eQXWXXq9CQt8	PPIL3	peptidylprolyl isomerase like 3	0.167036799958115	-0.049992367780886	2.06809402890501	0.042455848873485	0.999463745446798	-3.72765737574901
ZqfJR2U6HVICCdxIo0	FSD1L	fibronectin type III and SPRY domain containing 1 like	-0.12955605757939	0.044364789389577	-2.06794983544267	0.0424698273733693	0.999463745446798	-3.72788287237565
oHQJwoktKBUjCAlNcs	EXOG	exo/endonuclease G	0.135423649101993	-0.0581572088536202	2.06681227772482	0.0425802448486573	0.999463745446798	-3.72966136729673
QIQNL43V4lEaXT3uKg	TXNDC16	thioredoxin domain containing 16	-0.172970887747409	0.0687490183462637	-2.06575723719542	0.0426828744900043	0.999463745446798	-3.73131010286008
9ufhACQiiElsegij3k	SYAP1	synapse associated protein 1	-0.114102566493531	-0.038821994989035	-2.06392942414976	0.0428611821111246	0.999463745446798	-3.73416476013469
EckuyNPUjS6qKkXSQU	VPS11	VPS11, CORVET/HOPS core subunit	-0.115240618290336	-0.0241686622688231	-2.06295876190659	0.0429561340038752	0.999463745446798	-3.73567984883158
rClSqivKIeMk7jp0p4	MAP3K12	mitogen-activated protein kinase kinase kinase 12	-0.13079835679095	0.0165016708817604	-2.06227119410399	0.0430235030233466	0.999463745446798	-3.73675269105236
xpJ.yWreQozgXR3ol4	ACY1	aminoacylase 1	0.0836337397448796	0.0241175099828522	2.06222459131722	0.0430280725423117	0.999463745446798	-3.73682539633299
B8p.nM1UpQMk7hEoSU	TNFRSF10B	TNF receptor superfamily member 10b	-0.0899297651278225	0.00721680927918343	-2.0612516971441	0.0431235630275568	0.999463745446798	-3.73834289260717
oTptYXmtAHRi3qognQ	CALML4	calmodulin like 4	-0.103916828409345	0.0152326310345869	-2.06091793410708	0.0431563643358798	0.999463745446798	-3.7388633465096
xpL_1VSfazl9KgK0Sc	PREX1	phosphatidylinositol-3,4,5-trisphosphate dependent Rac exchange factor 1	0.104771767372625	-0.0165059569057642	2.06043926977824	0.0432034437617179	0.999463745446798	-3.73960962633451
ul73eU9XLTXuXRRJ_c	KBTBD4	kelch repeat and BTB domain containing 4	0.075102757854081	-0.0177781749657517	2.05944764472156	0.0433011170355482	0.999463745446798	-3.74115518414901
Klh1SVpQAhAETIZER0	NFIC	nuclear factor I C	-0.163898431008525	-0.0199826171645172	-2.05940274979821	0.043305543613565	0.999463745446798	-3.741225142778
TyjypSpSAtrN_vud6o	STRIP1	striatin interacting protein 1	0.142499620079889	-0.0251091676259119	2.05878795503897	0.0433662008699874	0.999463745446798	-3.74218303038442
xx3SinUU70qP2hlh5I	ACTR3B	ARP3 actin related protein 3 homolog B	0.16783306110441	0.0178479692368726	2.05830799927235	0.0434136055477549	0.999463745446798	-3.74293066014913
3t9fhRTT15ePIqfXTo	SAMD9L	sterile alpha motif domain containing 9 like	0.0860873762527072	0.00821799310289672	2.05807919294612	0.0434362202325828	0.999463745446798	-3.74328702040828
rn3UjVSZSi6.lax9E8	FAM184A	family with sequence similarity 184 member A	-0.200591025462108	-0.082216141213547	-2.05792988548541	0.0434509829191483	0.999463745446798	-3.7435195448062
Q5H8VSyV4LupVsV3sU	RBPMS	RNA binding protein with multiple splicing	-0.172377345594946	-0.0529600931908097	-2.05614113026564	0.0436281821944294	0.999463745446798	-3.74630414256607
TTVSIXfu9eUTJ5Sp8I	RTL8A	retrotransposon Gag like 8A	0.10311271821027	0.00788667459478326	2.05575762998323	0.0436662539614025	0.999463745446798	-3.74690087612028
9SEKkN_s.A3iTpL3FM	SEC24A	SEC24 homolog A, COPII coat complex component	-0.122752972206948	-0.0124013679946079	-2.05460046790406	0.0437813044446172	0.999463745446798	-3.7487008628646
lv.m6i7uXm6u7m7_r8	SIAH1	siah E3 ubiquitin protein ligase 1	-0.0919441704281961	0.00708413263333171	-2.05415356314091	0.043825807806489	0.999463745446798	-3.74939579856593
0npZXr0z_L8PseFehU	CYTH3	cytohesin 3	-0.131136719882249	0.0875568783935902	-2.05391140988438	0.0438499380521256	0.999463745446798	-3.74977229202848
llyeeU.eweVIKuEj94	CDC40	cell division cycle 40	0.055011605477113	-0.021667552277033	2.05283311602842	0.0439575278587261	0.999463745446798	-3.75144833217978
oKl7qJeQHR50IIToh0	SLC2A1	solute carrier family 2 member 1	-0.12600547738512	0.0445698477998552	-2.0501794343848	0.0442232771313499	0.999463745446798	-3.75556984953004
KSggllXXeqUz.3nq0Q	SOBP	sine oculis binding protein homolog	-0.149222235772603	0.00899643911915227	-2.04968414872347	0.0442730300293436	0.999463745446798	-3.75633858647085
HpT_uQ.IC76XV9ZyUQ	BRMS1L	breast cancer metastasis-suppressor 1 like	0.0867653381582964	0.0670905859027548	2.0493030977694	0.0443113405762697	0.999463745446798	-3.75692991021078
0EmDkCA36hIFwDp10o	XRCC4	X-ray repair cross complementing 4	-0.175008209964152	-0.0482915923028102	-2.04909697279086	0.044332076127433	0.999463745446798	-3.7572497403948
rlO55uXug3ouKrAJ40	STAT5A	signal transducer and activator of transcription 5A	-0.0958696124698999	-0.0205365831939962	-2.04880317449843	0.0443616458174839	0.999463745446798	-3.75770555956601
conjp0ep36KoO4IBQo	NDUFAF3	NADH:ubiquinone oxidoreductase complex assembly factor 3	0.169979640526751	0.00244222481399494	2.04833965447679	0.0444083319544992	0.999463745446798	-3.758424582711
9HupjiArrod98ekqUU	PTGES3L-AARSD1	PTGES3L-AARSD1 readthrough	0.0971859808006946	0.0337018863977832	2.04821090906053	0.0444213068221953	0.999463745446798	-3.75862427082531
KRXrypIO8CFN_ki9SU	C2orf42	chromosome 2 open reading frame 42	-0.0723033199897129	0.00421215728845542	-2.04784223174332	0.0444584799395138	0.999463745446798	-3.75919604107533
ofO.dSh4FNCEXgF804	SDHAP3	succinate dehydrogenase complex flavoprotein subunit A pseudogene 3	0.212927625210307	0.0144513993196196	2.04770253666333	0.0444725721685547	0.999463745446798	-3.75941266675507
QxXiIlfnpRV4gTlxec	LSS	lanosterol synthase	-0.155045717769722	0.0387597123729699	-2.04694935290667	0.0445486186132968	0.999463745446798	-3.76058041284043
f0KH150SVhgKOUDe0I	RPL38	ribosomal protein L38	0.0587543663959926	0.00328367200528724	2.04671232819489	0.0445725733937041	0.999463745446798	-3.76094782274139
Qt.sP9EFntT7_KO8XE	ATP11C	ATPase phospholipid transporting 11C	-0.0832961700051068	-0.0282640803177724	-2.04469160815901	0.0447772478518494	0.999463745446798	-3.76407863836221
BRySy6pllDcE4kSufQ	KBTBD2	kelch repeat and BTB domain containing 2	-0.08936894715436	0.0261652590164265	-2.04389951495815	0.0448576980960072	0.999463745446798	-3.7653051479146
EYZxSf3hd4ffoCJLVo	PAAF1	proteasomal ATPase associated factor 1	0.0632449307692109	0.0369352428020572	2.04366301995082	0.0448817422433984	0.999463745446798	-3.76567126727859
KrrjCKJbeu7SrRgVvE	SUN1	Sad1 and UNC84 domain containing 1	-0.0792175624672571	-0.0194049929328327	-2.04338434052019	0.0449100894869298	0.999463745446798	-3.76610264586305
ZW0V.L_fgfywFF58qE	PPIC	peptidylprolyl isomerase C	-0.15892564077151	-0.0873227412210794	-2.04312346360444	0.0449366398461209	0.999463745446798	-3.76650642142145
3lF65fLX6nqoqpUV8A	DUSP15	dual specificity phosphatase 15	0.181573675327012	-0.0101489684731758	2.04279891100684	0.0449696895898133	0.999463745446798	-3.76700868995683
61OpHrdLrqAbXLSgig	CRY1	cryptochrome circadian regulator 1	-0.131994668836973	0.0482417434973213	-2.04183029890819	0.0450684496175288	0.999463745446798	-3.76850727908201
KH31Nd6A0nusCyXgJQ	ARL17B	ADP ribosylation factor like GTPase 17B	-0.105596040691774	-0.0249866593490761	-2.04181644903208	0.0450698631102727	0.999463745446798	-3.76852870249934
Qu_z0gAaoio58PpXpk	POLA1	DNA polymerase alpha 1, catalytic subunit	0.0735482486372836	0.00361802899003933	2.03925626788758	0.0453318076580897	0.999463745446798	-3.77248672317374
oxhxplegXRNBmSNOSc	SOD2	superoxide dismutase 2	0.127579705882695	0.0277742315967498	2.03781918461769	0.045479416647165	0.999463745446798	-3.7747065711309
EgOz7_J0ApWFFVfank	CBX4	chromobox 4	-0.10840187960824	-0.0350358289073344	-2.0368325532406	0.0455809973527404	0.999463745446798	-3.77622983108496
Wnte91N1P31TnsFUp0	PATL1	PAT1 homolog 1, processing body mRNA decay factor	-0.07743887671874	-0.033588788349591	-2.03532936708081	0.0457361367265747	0.999463745446798	-3.77854937944786
izF53O6ueTnKAsqeqk	C1orf74	chromosome 1 open reading frame 74	0.115986656666584	0.0135758371833767	2.03523880483907	0.0457454978932156	0.999463745446798	-3.77868907787368
QoxUVUQORUIhCU.ExI	ARV1	ARV1 homolog, fatty acid homeostasis modulator	0.0882336642429624	0.0118493963943263	2.03482110860747	0.0457886953487426	0.999463745446798	-3.77933333351007
ZV4mZ5W1U3wwIU5Xmc	PTH2	parathyroid hormone 2	0.22662867870405	-0.0188227164153812	2.03402540796254	0.0458710826021391	0.999463745446798	-3.78056030906551
3STd_L5eTS7ooLu0S4	GDAP2	ganglioside induced differentiation associated protein 2	-0.0878089355802581	-0.00998931760684956	-2.03372531056759	0.0459021879733569	0.999463745446798	-3.7810229539072
uSfI6ingbjh6cRBIjk	CEBPZ	CCAAT/enhancer binding protein zeta	-0.0878465403719492	0.00418399479304834	-2.03372042236575	0.0459026947902684	0.999463745446798	-3.78103048931212
3gRRofXYRTQiQXoSJU	IDH2	isocitrate dehydrogenase (NADP(+)) 2, mitochondrial	0.0869509581286372	-0.0505014094636318	2.03371411263299	0.0459033490009992	0.999463745446798	-3.78104021605424
T.1KCViVKF76SL5Srw	SOX18	SRY-box 18	-0.197334076085738	0.00639835722400709	-2.0307136405957	0.0462153573412005	0.999463745446798	-3.78566263680544
BV9KdE5EoOcTjpSefU	GABARAPL1	GABA type A receptor associated protein like 1	0.132526304600281	0.0383732186347306	2.02994463677336	0.0462956165634938	0.999463745446798	-3.78684639051028
WrRKgtEgSwxnJKpOqQ	FAM86JP	family with sequence similarity 86, member A pseudogene	-0.114851050158209	-0.0358619202502042	-2.02851717267421	0.0464449158624348	0.999463745446798	-3.78904271055012
lh7AVE8KAUcat6S5u0	PAPD7	poly(A) RNA polymerase D7, non-canonical	-0.0891418551823966	-0.0494599473528846	-2.02805840684668	0.0464929863397026	0.999463745446798	-3.78974829264175
iW7u1L8Sbd5Vcm7.uE	ADARB1	adenosine deaminase, RNA specific B1	-0.229790861992693	-0.0856822968968581	-2.02789858898803	0.0465097424528186	0.999463745446798	-3.78999406029859
KTqv.epSX8gR7yrExk	UBE3A	ubiquitin protein ligase E3A	0.0970875852230515	0.0158995614699225	2.02760243321763	0.0465408066589919	0.999463745446798	-3.79044944406763
3n0prAUEnRAogIkcUo	KTN1	kinectin 1	-0.0819929765386261	-0.0167698600144644	-2.0252800011766	0.0467850293883017	0.999463745446798	-3.79401854323188
NtFgC55qME1Ck0UBaU	HIST1H4B	histone cluster 1 H4 family member b	0.172406028263417	0.035622408867392	2.02525147249582	0.0467880362534931	0.999463745446798	-3.79406236401072
BmAPaUq92d_27e9AWk	RPS29	ribosomal protein S29	0.0831037180195479	-0.0064128581653308	2.0230610248684	0.0470194018939518	0.999463745446798	-3.79742535810878
6ecW_k_SBaAXVQRM9E	LGALS17A	galectin 14 pseudogene	-0.181214991753588	-0.0181256448076729	-2.02285953038823	0.0470407340433902	0.999463745446798	-3.79773455496739
Eq3gjglX3qijwC4460	NUCKS1	nuclear casein kinase and cyclin dependent kinase substrate 1	-0.298781835855393	0.0211055161933518	-2.02229391441006	0.0471006600832079	0.999463745446798	-3.79860236081802
ul7aeqSIeAx5RcX_k8	EME1	essential meiotic structure-specific endonuclease 1	-0.102863770459511	0.00834137888447631	-2.02223929210062	0.0471064506971079	0.999463745446798	-3.79868615493565
oSnepR9xM1RMqc9QXo	CCDC112	coiled-coil domain containing 112	-0.140100487052313	0.00684901606476471	-2.02218031011693	0.0471127041756487	0.999463745446798	-3.79877663488071
fno46Qa60PWors7qgo	TRIM9	tripartite motif containing 9	0.151292615541774	0.0142365069529338	2.02215022748963	0.0471158939170706	0.999463745446798	-3.79882278156146
ltEuXyC6SK4q0CBqtU	ZNF219	zinc finger protein 219	-0.1471914658691	-0.0204001275612827	-2.02174710584639	0.0471586559029706	0.999463745446798	-3.79944111210347
KkeXS301ARf1f5XiF0	CSRP1	cysteine and glycine rich protein 1	0.0863986198773664	0.0057886362776757	2.02035983234224	0.0473060689937262	0.999463745446798	-3.80156817725126
3LV.UQb6AwJ6l27eZc	SNORA73A	small nucleolar RNA, H/ACA box 73A	0.146887020182486	0.0353390418496282	2.02025764150917	0.0473169435432671	0.999463745446798	-3.80172481360724
Qpc.6G7ijujorjgBRU	SLC6A4	solute carrier family 6 member 4	-0.123480955867188	0.00683378743382368	-2.02015715501973	0.0473276388219648	0.999463745446798	-3.80187883090965
cvKKId_O0X0s34CatU	CUL4B	cullin 4B	0.102837301118466	0.0329570329910975	2.01981896349021	0.0473636495027379	0.999463745446798	-3.80239713410199
BH70tH4jgOfqsn.U10	NUDT21	nudix hydrolase 21	0.0940077217509602	0.0268146965321064	2.01935357629004	0.0474132425007428	0.999463745446798	-3.80311025154297
ontXUcSAXRIESQKMLk	CAST	calpastatin	-0.0950752422682196	0.012524825891821	-2.01547342882448	0.0478284622714493	0.999463745446798	-3.80905031981451
0pVp4r_gKDQgGkiIeI	TSR3	TSR3, acp transferase ribosome maturation factor	0.0872508541420573	0.0357893705563849	2.01485749150244	0.0478946610488094	0.999463745446798	-3.80999234341974
lmknhIDM663d5KovUk	OSCP1	organic solute carrier partner 1	0.21405755720557	-0.0994497042276377	2.01404397357997	0.0479822157192101	0.999463745446798	-3.81123616869491
iDieCZbqCKkxouu1O4	ACAA1	acetyl-CoA acyltransferase 1	0.0762716937565628	0.0312725569581206	2.0136173675655	0.0480281840164214	0.999463745446798	-3.81188825305325
BGFc8d70VyJIYGkqCE	ZNF2	zinc finger protein 2	-0.0837147107252621	0.00929013343924976	-2.0135626324873	0.0480340846505828	0.999463745446798	-3.81197190917577
6Lyzpd78C6eqUAwqOI	UVRAG	UV radiation resistance associated	-0.16639201768602	-0.00733168127090079	-2.0132797635537	0.0480645888427679	0.999463745446798	-3.81240420973802
ZYQu0orjQenYWAUjpI	HSPA2	heat shock protein family A (Hsp70) member 2	0.185699520922126	0.053372730511443	2.01289302263213	0.0481063213696612	0.999463745446798	-3.8129951700353
0Vd7ItOYHEv6B_ofJU	ELMOD2	ELMO domain containing 2	-0.112619868896774	-0.0138534826236451	-2.01193076273362	0.0482102921971832	0.999463745446798	-3.81446512784469
ctRKfX7CQtJJEnHRnk	SCMH1	Scm polycomb group protein homolog 1	0.0861782811594522	-0.014787691153251	2.01161369736692	0.0482445929051172	0.999463745446798	-3.81494934708147
ZO60RULRIDAAeH8WeQ	PRDM1	PR/SET domain 1	-0.141999044988532	0.00719010925017691	-2.01105222813852	0.0483053850821333	0.999463745446798	-3.81580665586082
EKpqtVJH7xARGORfB0	GIGYF1	GRB10 interacting GYF protein 1	0.168693638627503	-0.0304301040573378	2.01050876545737	0.0483642902639257	0.999463745446798	-3.81663627349418
c_iDsNZjkvFxGiRlAY	HIST1H4L	histone cluster 1 H4 family member l	-0.211799423033811	-0.0455391343299205	-2.00970974784099	0.0484510066890046	0.999463745446798	-3.81785565422997
fIcGCAciHjNiT3lRdk	CACNB2	calcium voltage-gated channel auxiliary subunit beta 2	-0.150238753475429	0.00217405212595849	-2.00957818519376	0.0484652978170718	0.999463745446798	-3.81805639182279
QU74qnU9UPXq0K4PBU	PHF20	PHD finger protein 20	-0.106543484188689	-0.00988528243030563	-2.00944273317896	0.0484800152125073	0.999463745446798	-3.81826305192874
lS.0sOLoSwuuneSOlU	DIS3L	DIS3 like exosome 3'-5' exoribonuclease	0.0815554163499646	0.0360977794915574	2.00914367025775	0.0485125231658915	0.999463745446798	-3.81871929173677
9xl9JiBXeVEuiPlNaA	SMARCB1	SWI/SNF related, matrix associated, actin dependent regulator of chromatin, subfamily b, member 1	0.0999017145430119	0.00999115318995293	2.00854213822732	0.0485779659988081	0.999463745446798	-3.81963678999675
Zwvp0Jat6XhKuS0RSg	PGP	phosphoglycolate phosphatase	0.141085802357419	0.00578016384564291	2.00709181975683	0.048736063050129	0.999463745446798	-3.82184793965994
feJX9UTtynUO3XsrUU	CDS2	CDP-diacylglycerol synthase 2	0.0695882187598228	-0.00106240524821926	2.0065307252865	0.0487973454820275	0.999463745446798	-3.82270301164996
6ngUKB5WDueBChP590	H2AFV	H2A histone family member V	0.128145248237743	0.0146273831094068	2.00631100956095	0.048821360725492	0.999463745446798	-3.8230377880174
HRe5_O0n0HmGIlx6XU	WDR13	WD repeat domain 13	-0.0928385645806936	-0.0245824696805529	-2.00478509495882	0.0489884253568546	0.999463745446798	-3.82536191854207
0ddILSZKCJef6EaiAI	CYB5A	cytochrome b5 type A	-0.0760748164893734	0.00301374785667083	-2.00457467183345	0.049011501955628	0.999463745446798	-3.82568229542576
uSUg6gOcPSddSklQ6o	CFH	complement factor H	0.156379968755388	0.0131024253916828	2.00386530305913	0.0490893654556242	0.999463745446798	-3.82676212100233
cnkCc4zAed_S1AqMXg	DAPP1	dual adaptor of phosphotyrosine and 3-phosphoinositides 1	-0.117880751771706	0.0191923917708866	-2.0030935563745	0.0491741963417894	0.999463745446798	-3.82793652498568
fJ9X3EjHlIjnq5ICKo	UTS2	urotensin 2	-0.203229491011546	-0.0704545792266286	-2.00264545977737	0.0492235090859992	0.999463745446798	-3.82861823555121
lvk.TqXqr9ckijPolU	VAV3	vav guanine nucleotide exchange factor 3	-0.15957710189659	-0.0165392941590101	-2.00212013298782	0.0492813749722974	0.999463745446798	-3.82941727207865
oaSUsoBJJckEV0Xn0g	TEN1	TEN1, CST complex subunit	0.112167063655547	-0.00612734421195451	2.0001738890344	0.0494962667446766	0.999463745446798	-3.83237598224962
TDqner15e6Xt7XXVw8	GJC2	gap junction protein gamma 2	-0.155363715066137	-0.0661519944475011	-1.99587098235137	0.0499742196358179	0.999463745446798	-3.83890848808396
fBKbdP_0L3yW9L_0qk	SHE	Src homology 2 domain containing E	0.175208909893922	-0.00164696865936289	1.99568439672945	0.0499950341358877	0.999463745446798	-3.83919147963068
i9GC.vTSHXuQf1Q7pc	VCAM1	vascular cell adhesion molecule 1	-0.145359982338119	-0.0152289919840988	-1.99421092270686	0.050159668222715	0.999463745446798	-3.8414254702318
N7VH13O1f1_u3u3uqU	SLC2A11	solute carrier family 2 member 11	-0.135616814384494	0.0051738338722551	-1.99318424619301	0.0502746551791266	0.999463745446798	-3.84298120923485
QTTvpSjrdjdeF_41l4	TP53BP2	tumor protein p53 binding protein 2	0.193769439930794	0.0369747477343804	1.99312656540842	0.0502811220763631	0.999463745446798	-3.84306859324403
EhJFdGgUuuOkfdAx6U	PPP2R5C	protein phosphatase 2 regulatory subunit B'gamma	0.070096974660231	0.0163521492614679	1.99302063602201	0.0502930002352567	0.999463745446798	-3.84322906618962
opeKpk_0MCRJ6eIeQA	RPL35	ribosomal protein L35	0.0784088040408571	0.021869741368198	1.9920953579821	0.0503968565015522	0.999463745446798	-3.84463046030735
rS7tfgXh4ye.wiUel4	FAM96A	family with sequence similarity 96 member A	0.0571001372346629	0.00449694039458872	1.99178513079228	0.0504317185269973	0.999463745446798	-3.84510019348799
xnkEUS.NPoXoquuBcE	GABPB1	GA binding protein transcription factor beta subunit 1	0.110096276058085	-0.004982732267393	1.99095112511034	0.0505255430069603	0.999463745446798	-3.84636269616493
0iEd5d66eSJDFQl0.o	FYCO1	FYVE and coiled-coil domain containing 1	-0.108057323323759	-0.0613436769528902	-1.98925548963824	0.0507167606909544	0.999463745446798	-3.84892810569307
Q1KErrPJ1Ht8EyxukY	PIN4	peptidylprolyl cis/trans isomerase, NIMA-interacting 4	0.126811792800325	0.00502842711124315	1.98893321666245	0.0507531735780957	0.999463745446798	-3.8494154739553
94JrR13S6AiRijvdJ0	ZNF510	zinc finger protein 510	-0.151980217996001	-0.0608761464409685	-1.98795604685543	0.0508637186355322	0.999463745446798	-3.8508928138352
9clRqoVI3THQSCiHSI	LILRB5	leukocyte immunoglobulin like receptor B5	0.186236827157573	-0.00879617164254376	1.98773017066968	0.0508893008219943	0.999463745446798	-3.85123421652114
iukKCAu9Yk2uncGUEk	SSFA2	sperm specific antigen 2	-0.119915224847058	0.0880662040966192	-1.98758831999946	0.050905372113908	0.999463745446798	-3.85144860086075
uQq5OtQ73SKTq65.7k	SLC25A5	solute carrier family 25 member 5	0.0506294301483404	-0.00538446902231462	1.98754914645841	0.0509098111342988	0.999463745446798	-3.85150780299354
K.XUXnq3eeF_eoEd4o	GNGT2	G protein subunit gamma transducin 2	0.0920401507429217	0.00982371910307195	1.98738937471464	0.0509279193896785	0.999463745446798	-3.85174925212894
WHDqghEijii9Rqejgk	VPS25	vacuolar protein sorting 25 homolog	0.141001993989564	-0.0560134677121844	1.98719885671399	0.0509495195808728	0.999463745446798	-3.85203714341211
xA4dV3ldlWZ3nFP18Y	DUT	deoxyuridine triphosphatase	0.0995804873548864	0.0172707045574004	1.9871114696974	0.0509594298049803	0.999463745446798	-3.85216918571411
ZXPwrCVAlR.6P92HtY	ADCY1	adenylate cyclase 1	0.180038549677631	-0.00854949049205212	1.98658462071485	0.0510192126858598	0.999463745446798	-3.85296515099597
r4oXvVYpQkgGn5Qt1I	PPAN	peter pan homolog (Drosophila)	0.0935106027963417	-0.00496699017173571	1.98617739891439	0.0510654622961743	0.999463745446798	-3.85358025772865
Kv6jfd1RUR83VUqUdQ	CES4A	carboxylesterase 4A	-0.135980099061427	-0.0288074076193937	-1.98512962717768	0.0511846264046525	0.999463745446798	-3.85516240971238
cjrtVJVUoxO0jQiihM	ZC3H14	zinc finger CCCH-type containing 14	-0.15830776669525	-0.0418905391582922	-1.98443707063173	0.0512635221198227	0.999463745446798	-3.85620778369048
Kf7KZTSUf8glNJS7vo	ARHGEF3	Rho guanine nucleotide exchange factor 3	0.0775048762741752	-0.0322186735982073	1.98423954805756	0.0512860428635199	0.999463745446798	-3.85650587459278
0lsEgje4Io66.kXvXg	GXYLT1	glucoside xylosyltransferase 1	-0.0938723804378631	0.0484099269930061	-1.98264156386461	0.0514685502241631	0.999463745446798	-3.85891652372205
uCCHYnlKgphYYjDZfY	G3BP1	G3BP stress granule assembly factor 1	0.0996846086952085	-0.00945230829836988	1.98208062013648	0.0515327477994523	0.999463745446798	-3.85976233940796
9V4FXx8XpfFxN3iVSU	USP51	ubiquitin specific peptidase 51	0.160861682561354	0.0264395996878265	1.98091723503877	0.0516661105773077	0.999463745446798	-3.86151588081349
WB9gp8OO0U.cXlGzaY	PMS2P5	PMS1 homolog 2, mismatch repair system component pseudogene 5	0.0959957357750859	0.0331933469040856	1.98089684805413	0.0516684502361429	0.999463745446798	-3.86154660164374
QRUS9J6e_P9HkHeX_4	RIOK1	RIO kinase 1	-0.073783052362055	0.00444858189846978	-1.98063201465019	0.0516988513837288	0.999463745446798	-3.86194565005321
BlKOCoh6kId8ZVEeQ8	PLPP1	phospholipid phosphatase 1	-0.118815765321241	-0.0127749774120044	-1.98049739892015	0.0517143102560873	0.999463745446798	-3.86214846998438
TqIzIo.46GFuzL_Vek	RFESD	Rieske Fe-S domain containing	0.103808114005282	-0.00638259910360527	1.98044205888712	0.0517206664885572	0.999463745446798	-3.8622318450447
oXoQS2tg4KQHYJXRI4	ANP32C	acidic nuclear phosphoprotein 32 family member C	-0.0913873871740013	0.0167692430512429	-1.97487779993606	0.0523631853196162	0.999463745446798	-3.87060460909037
KkrsSIikgsewouigig	PSMC3IP	PSMC3 interacting protein	0.12881018867156	0.0251169102858669	1.97406888644547	0.0524571582651807	0.999463745446798	-3.87182011064953
ifiI4kUvEQoffzWJno	INPP4B	inositol polyphosphate-4-phosphatase type II B	-0.140809542269359	0.0403245921907475	-1.97318621961279	0.0525598636799033	0.999463745446798	-3.87314594304442
iJaLrMN8aLVaUh.aXI	RPRD2	regulation of nuclear pre-mRNA domain containing 2	0.148764181550684	-0.0042457725284617	1.97281423920923	0.052603198045276	0.999463745446798	-3.87370453148866
uEFBIHqvVBU2dJJZ9I	HNRNPR	heterogeneous nuclear ribonucleoprotein R	-0.0775289524520909	0.0095144231125611	-1.97254476988995	0.0526346093077996	0.999463745446798	-3.8741091258957
ThMpCe5J.E.wUqh3uk	CREBRF	CREB3 regulatory factor	-0.142483588584533	-0.0472819496953872	-1.97164739556182	0.0527393292321054	0.999463745446798	-3.87545614136018
xknVChEJ76jnH3SfRk	HIRIP3	HIRA interacting protein 3	-0.0630890354617895	0.0164339817447964	-1.9714052142585	0.0527676212869471	0.999463745446798	-3.87581957951167
xniZB5VN4UeHQMYHn4	WDR41	WD repeat domain 41	0.0654764763155049	0.00584632889116248	1.97130446237117	0.0527793951221575	0.999463745446798	-3.87597076505729
ig3Xne4Oc0hVApQX6k	SLC39A11	solute carrier family 39 member 11	0.0852221015776889	-0.0252971353096116	1.97125590699979	0.0527850700896538	0.999463745446798	-3.8760436235312
6nmuUqFyZKH.rDUwDo	GOSR2	golgi SNAP receptor complex member 2	0.192706242132785	0.0455431794845627	1.97093192514189	0.0528229492047974	0.999463745446798	-3.87652972599315
xXfVRXtXsgBS4JKxok	ARHGEF11	Rho guanine nucleotide exchange factor 11	-0.14278919493194	-0.0924829020114255	-1.97078855707113	0.0528397188367077	0.999463745446798	-3.87674481332263
ERAvJ6t65d7r1J10so	L2HGDH	L-2-hydroxyglutarate dehydrogenase	0.0963135331435071	0.000369343998821505	1.97012690830311	0.0529171702278279	0.999463745446798	-3.87773727285481
ryiHh7i56cAlerrinQ	SCYL3	SCY1 like pseudokinase 3	-0.0877575912413677	-0.0166021154610169	-1.96933942190112	0.0530094783183007	0.999463745446798	-3.87891810874742
ZoigEiF7I6OPPeV6h0	GON4L	gon-4 like	-0.0705469476094126	0.02049951542046	-1.96807541629774	0.0531579308850831	0.999463745446798	-3.88081262724173
Zp8s2d.95qnHeCx4fk	SIK2	salt inducible kinase 2	-0.162921094246686	0.0243268610226886	-1.96785815603297	0.0531834829868588	0.999463745446798	-3.88113815505395
iH9zOaWgSrr4TS.30o	ACKR2	atypical chemokine receptor 2	0.185905632843884	0.044436025996056	1.96774577815322	0.0531967039277183	0.999463745446798	-3.88130652206665
QrjxXuzCLO7dHkX0Ok	RAP1A	RAP1A, member of RAS oncogene family	0.104547701412615	0.0347683720514512	1.96684484413896	0.0533027977542732	0.999463745446798	-3.88265601907215
fuxTCUEFnh1KPkwlV4	ASH2L	ASH2 like histone lysine methyltransferase complex subunit	0.061555893266623	0.00761516859330785	1.96672922151274	0.0533164265259942	0.999463745446798	-3.88282916975117
K_L4CwEQnp59XukHuk	PTPRO	protein tyrosine phosphatase, receptor type O	-0.150946871703847	-0.0336650591186452	-1.96602835060358	0.0533991038944641	0.999463745446798	-3.88387856962802
9J5ZuBOCh_peqfkojU	CTU2	cytosolic thiouridylase subunit 2	-0.13295573685917	-0.00865333329470205	-1.96596769432161	0.05340626428129	0.999463745446798	-3.88396937376311
lqXVe7h3F5He78zXuU	NIPAL4	NIPA like domain containing 4	-0.198192728372113	0.0562115548553918	-1.96550171057415	0.0534613003356426	0.999463745446798	-3.88466688309364
ZRF7LVJx6op4pKIOuw	PDCD7	programmed cell death 7	-0.0908749882928419	0.0136708840491979	-1.96519320853372	0.0534977632926881	0.999463745446798	-3.88512858629035
igFXtVLSIwTUHB1IJo	EXO1	exonuclease 1	0.0793809616360391	0.0318559378710255	1.96504709227032	0.0535150407028576	0.999463745446798	-3.88534724144027
6V_yuETneV3iktJgpA	ISCA1	iron-sulfur cluster assembly 1	-0.0887300579477457	0.00538724701146315	-1.96370077538997	0.0536744592101754	0.999463745446798	-3.8873612669916
lLkJVIh77K_f.fXXqQ	CKAP2L	cytoskeleton associated protein 2 like	0.0797191844448897	0.0208926637586994	1.96346866718884	0.0537019842601567	0.999463745446798	-3.88770836839218
3V0Xf4B3obPzp1F1UU	SCAF1	SR-related CTD associated factor 1	0.13121755430727	0.00620476548643647	1.9618996309844	0.0538883679429242	0.999463745446798	-3.89005381481725
ZofWqw4S44DkqhevlU	SNHG12	small nucleolar RNA host gene 12	-0.160783535472449	-0.0349501007315499	-1.96174941314915	0.0539062410345838	0.999463745446798	-3.89027827975743
rF7ol3er4KJK0Q47oE	ABHD17B	abhydrolase domain containing 17B	-0.0921627997499863	-0.0269407881143601	-1.96116564148889	0.0539757468930416	0.999463745446798	-3.8911504461028
BSu4lFuVpQsA7.8A68	PPID	peptidylprolyl isomerase D	0.24094097320044	0.00895952732824274	1.9608550130698	0.05401276253825	0.999463745446798	-3.89161443899539
idSZRxRXiu1AllJtNA	NOC4L	nucleolar complex associated 4 homolog	0.112715958247007	-0.000621262223862896	1.96016863903513	0.0540946302433564	0.999463745446798	-3.89263946503064
3qmr67v9V_7FIkT18o	CTDP1	CTD phosphatase subunit 1	-0.120543353703341	0.0202362213657022	-1.95812771688381	0.054338688185883	0.999463745446798	-3.8956855181166
ltUElOBTkfOjFSX.Kk	ZFP90	ZFP90 zinc finger protein	0.0793111277445962	0.0177281226310168	1.95733721419445	0.0544334702285956	0.999463745446798	-3.89686459216278
E9srjpeTvsHFW1Z6nQ	PGS1	phosphatidylglycerophosphate synthase 1	-0.0735742305409572	-0.000581986114827488	-1.9571573273266	0.0544550585207822	0.999463745446798	-3.89713284446795
rnkulnV6lsoDiYwY4Q	MAX	MYC associated factor X	0.119387418119076	0.0062259611249349	1.95532496687386	0.054675377079374	0.999463745446798	-3.89986408819235
6HlFLVSeSF9NV9N1Rw	NEDD4	neural precursor cell expressed, developmentally down-regulated 4, E3 ubiquitin protein ligase	-0.120924203380721	0.00329873422790332	-1.95474626519223	0.0547451164799315	0.999463745446798	-3.90072621497597
QtXIUf7OFv5LeJKUqk	LBH	limb bud and heart development	0.0995837423208306	-0.0338300768833024	1.95442482671657	0.0547838858130685	0.999463745446798	-3.90120498522935
xuBm5ckgidWRNTl.gQ	BOLA2	bolA family member 2	0.0629158425821829	-0.0176733095888175	1.95417061474984	0.0548145633954887	0.999463745446798	-3.90158357561333
315T_ecDep60g55JjE	CREBRF	CREB3 regulatory factor	-0.16854046347311	-0.0377207981325079	-1.95174446909464	0.0551080812810189	0.999463745446798	-3.90519460403228
6kx5Ux3AM1UndEUV_8	RBAK	RB associated KRAB zinc finger	-0.135165087276192	-0.0238536607745767	-1.95103548538346	0.0551941074240421	0.999463745446798	-3.90624910366783
NUvQdJAR9eJF5xOUpA	STXBP4	syntaxin binding protein 4	-0.173223758934855	-0.0597847033654635	-1.95016749226301	0.0552995831087067	0.999463745446798	-3.90753964968364
cR54BdIgQ7KE5q5KyI	LOC401463	uncharacterized LOC401463	0.182404275525365	0.0745160449046804	1.94992815116862	0.0553286972429181	0.999463745446798	-3.90789541780268
rXUIvGLwoIuUVfilXg	RIPK3	receptor interacting serine/threonine kinase 3	0.0930559476138717	0.00195145459893603	1.94990412868399	0.0553316201275479	0.999463745446798	-3.90793112387797
0_FepinhRBRzoxWR10	PLPP2	phospholipid phosphatase 2	0.171128309528005	-0.0220435245830912	1.94874437249395	0.0554728875538628	0.999463745446798	-3.90965448368666
6XB_cI5yssYV3o.oKQ	SMARCAD1	SWI/SNF-related, matrix-associated actin-dependent regulator of chromatin, subfamily a, containing DEAD/H box 1	0.069674593787139	0.00798578211218942	1.94850940283587	0.055501546104001	0.999463745446798	-3.91000353203068
0meR92tN6oxH12HgSI	SESTD1	SEC14 and spectrin domain containing 1	-0.116039320314042	-0.0117105089681923	-1.94787425080365	0.0555790768348334	0.999463745446798	-3.91094686919422
iURFSiCujC6nFCp9eQ	C19orf48	chromosome 19 open reading frame 48	0.111887221252715	0.0316684273391053	1.94781482723453	0.0555863351733892	0.999463745446798	-3.91103511223824
oueo8Su4lFedBSv888	UTP20	UTP20, small subunit processome component	0.127038901835553	-0.0735230055636178	1.9475769952395	0.0556153934317303	0.999463745446798	-3.91138826542713
QGoxc2iQJcUu5J6QKI	VWA8	von Willebrand factor A domain containing 8	-0.108649993414071	0.0122656147036549	-1.94749730084119	0.0556251333684509	0.999463745446798	-3.91150659404214
ZnOgng5aGckS.H.1f0	VBP1	VHL binding protein 1	-0.0647412641997877	0.0381015528197659	-1.9471695542139	0.0556652045494311	0.999463745446798	-3.91199318115491
Eq_2.6AspQSANceREk	MAP4K5	mitogen-activated protein kinase kinase kinase kinase 5	-0.128446133060971	0.031140354852038	-1.94636965692433	0.0557631053645496	0.999463745446798	-3.91318044414947
idIHs_6NWi.VUDU3E0	MSANTD2	Myb/SANT DNA binding domain containing 2	-0.0978485141738252	-0.0190801732045819	-1.94608866385658	0.0557975313753761	0.999463745446798	-3.91359741256359
x8exISAAeI7JV3XoLk	SLC25A13	solute carrier family 25 member 13	-0.0726489461638693	-0.032889631606649	-1.94587915780748	0.0558232108927391	0.999463745446798	-3.91390826651208
TUCU6iq7XXSFOVUjj8	BTBD2	BTB domain containing 2	0.0648633368829657	-0.00229553591641869	1.94551845176827	0.0558674468315337	0.999463745446798	-3.91444339458807
QrpKl4eeaKXaQz4.yE	PEMT	phosphatidylethanolamine N-methyltransferase	0.161077772932666	0.000871779135074706	1.94481029487661	0.055954379954171	0.999463745446798	-3.9154937342149
rlfSx68koIDtcQCGLc	PIGH	phosphatidylinositol glycan anchor biosynthesis class H	0.0864912331722909	-0.0511219100403101	1.94473478887515	0.0559636558386024	0.999463745446798	-3.91560570518003
Zzkrh7v4XVITzYnpZU	ASMTL	acetylserotonin O-methyltransferase like	0.119530827952984	0.013806758178898	1.94458027195619	0.0559826422659846	0.999463745446798	-3.91583483287443
BoO4.pLSrHCTq6gdeU	UBIAD1	UbiA prenyltransferase domain containing 1	0.0816766759705692	0.0235370683600692	1.94449581977792	0.0559930217328816	0.999463745446798	-3.91596005732174
31LIK5Uh9T8.pd9F4o	RDH14	retinol dehydrogenase 14 (all-trans/9-cis/11-cis)	-0.089237188230977	-0.0143183456690204	-1.94356877986966	0.0561070659049649	0.999463745446798	-3.9173343465729
ZlToS17t6OKKHS56SM	SDSL	serine dehydratase like	-0.127055097332133	0.0274815432192612	-1.94341347881331	0.0561261903178841	0.999463745446798	-3.91756451653395
ukrjIIkBRtUYNUMOEk	MAPKAPK5	mitogen-activated protein kinase-activated protein kinase 5	-0.0569711364134419	-0.01489925867345	-1.94294043960468	0.0561844765124018	0.999463745446798	-3.91826550378184
66Ekq73SdUmCXUQSDo	TTYH2	tweety family member 2	0.208917908569414	-0.0368858186522354	1.94129840977162	0.0563872015119508	0.999463745446798	-3.92069763906974
K66dEXsNHkdQXpBIuI	NA	NA	0.164222319063764	0.00795232032985635	1.94013164972949	0.056531627706406	0.999463745446798	-3.92242472547134
3oV5wB3qBlXu12DoI4	WDR20	WD repeat domain 20	0.105583755541341	0.0170959300957732	1.94010232681531	0.0565352614640302	0.999463745446798	-3.92246811878545
Qeh9al2P31kQl4W6P0	ADAT3	adenosine deaminase, tRNA specific 3	-0.130549842824602	0.00339691627278373	-1.93946306175597	0.0566145299504223	0.999463745446798	-3.92341398852728
9ggoSbLpEQpACUV4rk	ZFP91	ZFP91 zinc finger protein	-0.11182976107206	0.0292935621779391	-1.93938870398547	0.0566237564057141	0.999463745446798	-3.92352399214908
9qzqR7kCHUye5cotyg	ELL3	elongation factor for RNA polymerase II 3	0.116541422935078	-0.0376410837027983	1.9383734780946	0.0567498556058778	0.999463745446798	-3.92502553175815
cfP36eXrrlXq7TJU_c	OPN3	opsin 3	0.130838797857247	0.0387462236438478	1.93832367518599	0.056756047668431	0.999463745446798	-3.92509917360402
Wt4zAE5RKIPao.i.d4	PERP	PERP, TP53 apoptosis effector	0.16902682122284	-0.0122962481134785	1.93787888841139	0.0568113740964573	0.999463745446798	-3.92575679122869
6dJUitVe1CarPUUpTM	OPA3	OPA3, outer mitochondrial membrane lipid metabolism regulator	0.121519774941894	0.0674525001170821	1.93763545156933	0.0568416742974783	0.999463745446798	-3.9261166570089
6SgeqFCJdUPlcHXtPo	ARMC8	armadillo repeat containing 8	0.13786863262204	-0.0212722439534177	1.93657065406054	0.0569743695694947	0.999463745446798	-3.92769025298188
l1ehjiXqoikiHCOe1Q	TSFM	Ts translation elongation factor, mitochondrial	0.1123487709759	0.0304701637154921	1.9350412169347	0.0571654292189905	0.999463745446798	-3.929949188209
fIDoOelV6N5E3l2ees	MRM2	mitochondrial rRNA methyltransferase 2	0.164836534737284	0.00803191183368625	1.9344940347751	0.057233916247197	0.999463745446798	-3.93075698209104
KeImOqcz4N3s5HiB4k	AK4	adenylate kinase 4	-0.162409926526268	-0.0396141965205619	-1.93438370291632	0.0572477341751647	0.999463745446798	-3.93091983859063
KBNdel3vq0u_ql5_qA	IFI27L2	interferon alpha inducible protein 27 like 2	0.081215581855057	-0.00107104509594855	1.93366601136143	0.0573376868912861	0.999463745446798	-3.93197899668021
EUUt2eQ0K_7dSCQGIQ	CUZD1	CUB and zona pellucida like domains 1	-0.162375702019787	0.00739260539901506	-1.93308428767471	0.0574106860541363	0.999463745446798	-3.9328372435237
NJ7096Q4.pBLmrrXYk	DUSP8	dual specificity phosphatase 8	-0.174878739173144	0.0142842476193435	-1.93278611092719	0.05744813418116	0.999463745446798	-3.9332770715331
T_S67nrj.kS4neaCq0	POLD3	DNA polymerase delta 3, accessory subunit	0.0920255551184965	0.00611668155635052	1.93262144826724	0.0574688231224383	0.999463745446798	-3.93351993310477
oMCiUJF9q2SVEF0Xo0	UGT2B17	UDP glucuronosyltransferase family 2 member B17	-0.0745685535439827	0.0286455394523187	-1.93224925882419	0.0575156099781388	0.999463745446798	-3.9340688100827
ubTI7Ez7trKnOKTvEo	NBEA	neurobeachin	-0.149877612692152	-0.0671431461586091	-1.93116908859245	0.0576515784048079	0.999463745446798	-3.93566124071764
oowjQ5XTwJJa7A74l8	RPLP1	ribosomal protein lateral stalk subunit P1	0.0664242175023834	-0.00248145855093882	1.93072051287697	0.0577081239244428	0.999463745446798	-3.93632232047634
KoNAKkuv0TSYRE7kJ4	USP16	ubiquitin specific peptidase 16	-0.0638159679059409	0.0177007402621556	-1.9306384676916	0.0577184712831978	0.999463745446798	-3.93644321845618
inkrerL6NOnUeo_q6A	RNF41	ring finger protein 41	0.0819718909420365	0.0107243738882139	1.92925418634761	0.0578932916491282	0.999463745446798	-3.93848235413422
upAvCfjjrwDa.jJFOo	TDP2	tyrosyl-DNA phosphodiesterase 2	-0.142945365970983	-0.0255212273590912	-1.92896346061	0.0579300643986337	0.999463745446798	-3.93891044942861
6uiCI1cM5deA5J8K14	GLMN	glomulin, FKBP associated protein	-0.0831055622244458	0.00823138521894213	-1.92822301958665	0.0580238094948149	0.999463745446798	-3.94000049825802
3TUqI_5JJ02OLFOaUQ	TUBG1	tubulin gamma 1	0.113908212555396	-0.0163950077527449	1.92761391608772	0.0581010229051976	0.999463745446798	-3.94089692271122
Tz3T_web9atmUi0.rE	BRPF1	bromodomain and PHD finger containing 1	-0.0713926591690783	-0.00514857774291863	-1.92740328403704	0.0581277441180767	0.999463745446798	-3.941206854637
0W6nuULuVKju.kCoTc	MT1IP	metallothionein 1I, pseudogene	0.145485196953005	0.0319325075222955	1.92688577080052	0.0581934412386628	0.999463745446798	-3.94196821731049
Z3tHSez0beJL3ksEXk	MFF	mitochondrial fission factor	-0.0765396027680821	0.0257350107062467	-1.9263066112844	0.0582670389824012	0.999463745446798	-3.94282006163642
QjpTeSFCCQldBIHg3E	DDX60L	DExD/H-box 60 like	0.118693365979018	-0.0652729030230139	1.92624686778905	0.0582746354909809	0.999463745446798	-3.9429079213297
WSeum6H2OIXgrkkQm4	PAXX	PAXX, non-homologous end joining factor	0.0817172179038438	0.00344979521392562	1.92601834376416	0.0583037005539232	0.999463745446798	-3.9432439702444
ouS1E7kwoU6on7P6g8	NSUN4	NOP2/Sun RNA methyltransferase family member 4	-0.0724861531594939	0.0330305140720269	-1.92522774767801	0.0584043483135507	0.999463745446798	-3.9444062877756
rPedae6aulaNNDqPNM	HVCN1	hydrogen voltage gated channel 1	0.08181223235418	-0.0526743961116254	1.92519248352621	0.0584088410926118	0.999463745446798	-3.94445812265617
xJV.X6euOCISLtIslU	TRPT1	tRNA phosphotransferase 1	-0.0642711925117898	-0.0218257913655317	-1.92344498127032	0.0586318470138599	0.999463745446798	-3.94702574092835
9MLpPJDXUpFXYjhpic	SSBP3	single stranded DNA binding protein 3	0.107378641682132	0.0416571970950016	1.92338959503206	0.0586389268801292	0.999463745446798	-3.94710708699418
0qDlJ15NFQSIkSeOkA	PRR32	proline rich 32	0.127971898918242	0.0336464642748881	1.92261707018622	0.058737752227137	0.999463745446798	-3.94824148472259
NEt5N8yS5f7dKl3npI	TRIM68	tripartite motif containing 68	0.073198000317011	0.0229932189701914	1.92258212970827	0.0587422253322918	0.999463745446798	-3.94829278290077
BqGLTk14BDgRC6E4.Y	SERPINI1	serpin family I member 1	0.150795365731282	-0.018805113369758	1.92235426649195	0.0587714036373878	0.999463745446798	-3.94862730233146
K1U7EnOFSeKB5OKeJI	SMIM29	small integral membrane protein 29	0.123488772579625	-0.0314669169818812	1.92177176592603	0.0588460498346179	0.999463745446798	-3.94948229692652
uiXrhEuRAggCa0AXBE	PAK1IP1	PAK1 interacting protein 1	-0.103141619407863	-0.0286150562004591	-1.92175901317228	0.058847684972351	0.999463745446798	-3.94950101288769
iVVBLu2Lf5AgF.I7r0	RGMB	repulsive guidance molecule family member b	-0.128075349803735	0.0612088332545669	-1.92174054104458	0.0588500535074658	0.999463745446798	-3.94952812241818
r6q6edenDnzyAO121U	RBKS	ribokinase	-0.119937142683102	-0.0665264683358309	-1.91970763369362	0.0591112120464879	0.999463745446798	-3.95251020542513
xpOSfuuLHvcoelADqQ	RUNDC1	RUN domain containing 1	-0.0802959434086234	-0.0194236538937409	-1.91870220077551	0.0592407385520113	0.999463745446798	-3.95398405933286
3eooU6i470Zd4S4DGY	EIF3F	eukaryotic translation initiation factor 3 subunit F	0.0750820367575347	0.039921105915039	1.91836121743959	0.0592847209190202	0.999463745446798	-3.95448374983615
Ht7_kVR54Ul1SIC7kE	HSD17B10	hydroxysteroid 17-beta dehydrogenase 10	0.0904692286508073	0.0314961025712412	1.91809682802812	0.0593188427406236	0.999463745446798	-3.95487114304306
i3KQV.9TCgiToue60U	SH3BP5	SH3 domain binding protein 5	-0.142546618509925	-0.00525041649025123	-1.91783500592847	0.059352649644186	0.999463745446798	-3.95525472845503
Wfov7E6h8kFEeLisAk	ARL13B	ADP ribosylation factor like GTPase 13B	-0.123427722178074	-0.00618908766334375	-1.91779277550932	0.0593581040363088	0.999463745446798	-3.95531659431141
uJEnKJd4T7eu.xut70	PTBP3	polypyrimidine tract binding protein 3	0.0640042353909688	0.00660222601781623	1.91651732855081	0.0595230385372338	0.999463745446798	-3.95718451041394
uRSc_Xk3qA_eDZEktM	JMJD1C	jumonji domain containing 1C	-0.0727928428039954	0.00478245545510751	-1.91589155223791	0.0596041028702119	0.999463745446798	-3.95810057363165
0ofRQkgMVokZTUQrnk	MCM5	minichromosome maintenance complex component 5	0.0889107919229563	0.0505705679809354	1.91510946915725	0.0597055471056283	0.999463745446798	-3.95924508325985
0lzjRfk6EkNewE0SLo	KLHDC2	kelch domain containing 2	-0.0664264233225911	0.0329575876142988	-1.91367479588714	0.0598920196436542	0.999463745446798	-3.96134353682622
f1d0LUk6OqA7d6NVEk	AGO1	argonaute 1, RISC catalytic component	0.0889330757962294	0.000974024407705106	1.91300874398204	0.0599787578289213	0.999463745446798	-3.96231728265499
l5.deQLR2Arh6aK4p4	C22orf34	chromosome 22 open reading frame 34	-0.164207859563988	-0.0780387241538861	-1.91284571527795	0.0600000048426146	0.999463745446798	-3.96255557997444
xt.it_o4NIDc1Kc31I	FTH1	ferritin heavy chain 1	-0.0830340231001914	0.0225134212890819	-1.91200901929211	0.0601091491987472	0.999463745446798	-3.96377828953504
BHuFy1VTSlEeeUXdEY	SCAMP3	secretory carrier membrane protein 3	-0.0630386795833965	-0.000595465952805581	-1.91018834733922	0.060347231727651	0.999463745446798	-3.9664373168172
r2UV0U1Ck1r_KEOk3E	CD79B	CD79b molecule	0.101412756999134	-0.0191250031642569	1.90988951098036	0.0603863856948599	0.999463745446798	-3.96687354465814
cAoqNe1Cl5jxNai_ZQ	USF2	upstream transcription factor 2, c-fos interacting	0.0798456499081253	-0.0372750384303743	1.90893114154363	0.0605120978679803	0.999463745446798	-3.96827212551514
cFyPXA4eTKEjVN11FQ	KMO	kynurenine 3-monooxygenase	-0.105657320521715	-0.0330246549082005	-1.90880858269054	0.0605281902570271	0.999463745446798	-3.96845093540088
9Su4lFGXpYC8vv_B08	COX16	COX16, cytochrome c oxidase assembly homolog	0.180496549223606	-0.00244063425442192	1.90877568811554	0.0605325100423159	0.999463745446798	-3.9684989259382
cSSDdKTNdJQUgHpLpI	RWDD3	RWD domain containing 3	0.101281773543009	0.0192649458308567	1.90843189290146	0.0605776735904523	0.999463745446798	-3.96900045209157
6p5DKN7p.oRJCtE6Ig	SLC9B2	solute carrier family 9 member B2	0.0765551183271735	0.0299451032302166	1.90738782944575	0.0607150047091224	0.999463745446798	-3.97052303929588
HR3OoB30kXF5lVREXc	LPCAT4	lysophosphatidylcholine acyltransferase 4	0.104262909088616	-0.025415470008666	1.90668820017481	0.0608071780924768	0.999463745446798	-3.97154291954685
TFxV5AN1z1SxJSxe0E	TGM5	transglutaminase 5	0.208663001644349	0.0341101401456982	1.90649299766736	0.0608329163859475	0.999463745446798	-3.97182741624784
Nd63i0H9nqgBc6BceQ	SLC38A1	solute carrier family 38 member 1	-0.0866412873130318	0.0167586040277808	-1.90594785394131	0.0609048448102304	0.999463745446798	-3.97262179734265
Bh95VJ.N7REKepF3Lk	PFKM	phosphofructokinase, muscle	0.0662704351813817	-0.00242114514520121	1.90543911767489	0.0609720344473076	0.999463745446798	-3.97336294589801
Ko9d7uro5u6kYf7HSA	HES5	hes family bHLH transcription factor 5	-0.121500735638411	-0.0314579122180667	-1.90462533434074	0.0610796426574039	0.999463745446798	-3.9745481390889
uXMTuqLuoJH0tKXQt0	ZNF234	zinc finger protein 234	-0.112644736081192	-0.000919345662763012	-1.90421364418936	0.0611341425008493	0.999463745446798	-3.97514755500909
WkSBLsV8uFL5xUJPuU	NCKAP1	NCK associated protein 1	-0.167927042723764	-0.0965810680780566	-1.90348291929464	0.0612309777926425	0.999463745446798	-3.97621120171335
xnVFMVvIKaen6jEiBE	MDM1	Mdm1 nuclear protein	0.11719513616858	0.0391228646617869	1.90329020175749	0.061256538251713	0.999463745446798	-3.97649166260483
Q5fWLP11Ij7okjq_zE	NSF	N-ethylmaleimide sensitive factor, vesicle fusing ATPase	-0.133663539890051	-0.0185942223643437	-1.90141491274376	0.0615057329938491	0.999463745446798	-3.97921946054132
iq.jDdUtfLAj4iKeiQ	GOLT1B	golgi transport 1B	0.0895191843252167	0.0482244082384212	1.90082844571835	0.0615838406149005	0.999463745446798	-3.98007205184169
E6k3XigOyThPrHB5O4	RALGAPA1	Ral GTPase activating protein catalytic alpha subunit 1	-0.0798560060913567	0.0290682800148093	-1.90069672504096	0.0616013951503638	0.999463745446798	-3.980263512367
Z1V914NJKjoKKsqC84	TBL1XR1	transducin beta like 1 X-linked receptor 1	0.0984179618674787	0.0194903433464015	1.90015545861522	0.0616735746817216	0.999463745446798	-3.98105013943666
NCm3C0pIIiJ59J9Ukk	SCLT1	sodium channel and clathrin linker 1	0.0954650065570874	0.0357783368102986	1.90013074421322	0.0616768721304822	0.999463745446798	-3.98108605239099
ZW4o_4iEA4Sk2kCr_k	RBM34	RNA binding motif protein 34	0.0641997914066176	0.0217136678875998	1.90000022833353	0.0616942883146285	0.999463745446798	-3.98127570062758
ZNMNXXtUdd3FBVFcck	EDA2R	ectodysplasin A2 receptor	0.126194356554095	0.0162421602503384	1.89952772268075	0.0617573748020367	0.999463745446798	-3.98196218706182
KO51fUnriKKLyJ62.4	IDS	iduronate 2-sulfatase	-0.0727751228593854	-0.0103304217678088	-1.89936652473377	0.061778909593479	0.999463745446798	-3.98219635145834
ZfYp6V5Skv9Wm.yjew	PLCH2	phospholipase C eta 2	-0.140163527475468	-0.0405853384149213	-1.89898866815663	0.0618294131945761	0.999463745446798	-3.98274517690154
xXt7d1N7_uqsieNSJE	CTSD	cathepsin D	0.125968930082808	0.00645578674946711	1.8986753732405	0.0618713140887913	0.999463745446798	-3.98320015575435
Nhu93rVO3yapOsa.bk	NAXD	NAD(P)HX dehydratase	-0.0772835744207915	0.0230991461835408	-1.898471346162	0.0618986141265942	0.999463745446798	-3.98349641623875
ol9ui.hDisSkqknZjk	SNRPA	small nuclear ribonucleoprotein polypeptide A	0.0565524812146026	0.0144469598231271	1.89743889458038	0.0620369186049094	0.999463745446798	-3.9849951738942
ZdnOEuhKFyOKKk4M6s	DNAJC7	DnaJ heat shock protein family (Hsp40) member C7	-0.0891534456365491	0.0305555456416572	-1.8967173850276	0.0621337252001961	0.999463745446798	-3.98604212776339
QTqiwyhSJrN3pFEcqE	PTPRA	protein tyrosine phosphatase, receptor type A	0.0767359050714581	0.00787835405310615	1.89640160122152	0.0621761348195039	0.999463745446798	-3.98650023908734
EhNNVBXag5NeH_tBEo	HSP90AB4P	heat shock protein 90 alpha family class B member 4, pseudogene	-0.190806611455264	-0.0120711224291536	-1.89611498944824	0.0622146478394576	0.999463745446798	-3.98691597220023
foUXXeUkoMCH7k1dAA	ASPSCR1	ASPSCR1, UBX domain containing tether for SLC2A4	0.0757644116756975	0.0146406383494245	1.89551148008988	0.0622958094594613	0.999463745446798	-3.98779118782067
3mkS1R9VN1ULK67yAE	RBM14	RNA binding motif protein 14	0.068257362738332	0.0210448564754196	1.89434344436211	0.0624531445055862	0.999463745446798	-3.98948439029251
rAlrkp3ntNtKHX7qe4	SERGEF	secretion regulating guanine nucleotide exchange factor	0.0884688054593942	0.0355072841397438	1.8938653168949	0.062517645379322	0.999463745446798	-3.99017722670275
NS4eJ7XYylOQqfXiL0	LARP6	La ribonucleoprotein domain family member 6	-0.163492748163398	0.054778822339457	-1.89329497729871	0.0625946596056591	0.999463745446798	-3.9910034832441
l46J5A.TpL05La0Ioo	APAF1	apoptotic peptidase activating factor 1	0.146540015645237	0.00155663269490258	1.89325741513548	0.0625997345220137	0.999463745446798	-3.99105789224192
Hd1yqCDNEpwybr6q4I	RAB11FIP1	RAB11 family interacting protein 1	0.105576158692913	-0.0671219056226902	1.89273413605604	0.0626704694430598	0.999463745446798	-3.99181576618719
NXhfbd7kYe8eh0ZJ44	POLRMT	RNA polymerase mitochondrial	0.0867626858303947	0.0280768847856289	1.89204430744097	0.0627638211422792	0.999463745446798	-3.9928145753276
HhoAXsV457MOzvg7rU	RPS6KC1	ribosomal protein S6 kinase C1	-0.102037625274462	-0.0304321451291437	-1.89167050563561	0.0628144553001869	0.999463745446798	-3.99335567269986
u4Pif.lRI9_P7L7_ko	LEPR	leptin receptor	-0.131100352812266	-0.00431833755573428	-1.89068308547901	0.0629483745788673	0.999463745446798	-3.99478456229947
rjjjVI_UmSvoJZM.o0	TBCA	tubulin folding cofactor A	-0.05019760341598	-0.016378332043707	-1.88980583006717	0.0630675550402147	0.999463745446798	-3.99605348306092
6GujnvB.fX1XSkOmuE	ZNF585A	zinc finger protein 585A	-0.160883896201543	0.0231228458100144	-1.88964810979285	0.0630890025030193	0.999463745446798	-3.99628156528546
Bt_RCUpI0.dcJ4zT6c	TFB2M	transcription factor B2, mitochondrial	-0.0730811828678658	0.0148919644540956	-1.88939859726971	0.0631229448460988	0.999463745446798	-3.99664235581073
H_R4iKCoSSi4rgipog	INO80	INO80 complex subunit	0.145135118462454	0.0260043913268135	1.88913518743357	0.0631587944457061	0.999463745446798	-3.99702319614605
xd6UMUiTNJIsoiQo.o	SAMD8	sterile alpha motif domain containing 8	-0.121423508123	-0.00940589884906731	-1.88893710549437	0.0631857643675735	0.999463745446798	-3.99730955406221
rkP35BRRYpVgCR620o	DMKN	dermokine	-0.161269567865127	-0.0725583984370546	-1.88868831797864	0.0632196519105733	0.999463745446798	-3.99766917728788
0EnXekOzeCqAldeElI	PHF10	PHD finger protein 10	0.107857229678685	0.0103845342968577	1.88670509822713	0.0634903372542107	0.999463745446798	-4.00053443894761
obsJQeIxbjrvj9.Q44	ATP2B1	ATPase plasma membrane Ca2+ transporting 1	-0.089240245145458	-0.0778226760713465	-1.88630488924624	0.0635450794397066	0.999463745446798	-4.00111232085319
ByNTVMdCnEgexB27oI	IL6ST	interleukin 6 signal transducer	-0.124417733036459	-0.0467987698935525	-1.88571765051405	0.0636254764564214	0.999463745446798	-4.00196006925062
QrxUd7UdUynEgAtEJk	RPL15	ribosomal protein L15	0.0621911603520426	0.0143966947208777	1.88465275031882	0.0637714877294494	0.999463745446798	-4.00349678603531
Tjd.7nq9Lp30qhKA5c	RETSAT	retinol saturase	0.121012105181097	0.0246837235726523	1.8839901941966	0.0638624752401983	0.999463745446798	-4.00445251008978
Hf6qe3VO24.4bjd1uE	NCDN	neurochondrin	0.140905431928298	0.0439382597306265	1.88150740181786	0.0642044076083278	0.999463745446798	-4.00803125865388
HXhS1CUgB417FAn4u0	OIP5	Opa interacting protein 5	0.0789673216630447	0.0684016038780106	1.88117980549121	0.0642496396431738	0.999463745446798	-4.00850315265563
rOiNiu_uhlhXvuhJ3Q	ACOT7	acyl-CoA thioesterase 7	0.0971656392013191	0.0425475587622412	1.88089081621023	0.0642895634300913	0.999463745446798	-4.00891937417065
Hua3qUtEKD7vtwlAqo	PXDN	peroxidasin	-0.248405354609468	-0.114606311320835	-1.87988495321366	0.064428686398293	0.999463745446798	-4.01036764581477
NvhIBEZiDikjVIkKHo	PPARA	peroxisome proliferator activated receptor alpha	-0.140181208227449	-0.00921759695468514	-1.87934805315733	0.0645030500691905	0.999463745446798	-4.01114041141947
TUP_z3qqKJXd9e6VRc	ATP1A3	ATPase Na+/K+ transporting subunit alpha 3	0.147894925264896	0.0479746843936493	1.87833964228889	0.064642916372835	0.999463745446798	-4.01259130195329
uAAppoS_lIqOiHrqhk	ZNF579	zinc finger protein 579	-0.123643907733573	-0.0140360547455587	-1.87673428683207	0.0648661065236269	0.999463745446798	-4.01489965511311
NgashCh4j5d4fXXVeo	HDAC3	histone deacetylase 3	-0.0656569852630242	0.0135035416022737	-1.87668203972944	0.064873381266174	0.999463745446798	-4.0149747524256
31UV1P.6M8BKgJ_cTw	ACAP2	ArfGAP with coiled-coil, ankyrin repeat and PH domains 2	0.0751539447306116	0.0146226087967473	1.87627570971384	0.0649299810248485	0.999463745446798	-4.01555872755945
lixSAqzqjXL0jEI09U	HOMEZ	homeobox and leucine zipper encoding	0.191115982958677	-0.00671788335031258	1.87577120214837	0.0650003143778049	0.999463745446798	-4.01628364790507
HUp9.q_NUXOI0gzs5I	SNRNP27	small nuclear ribonucleoprotein U4/U6.U5 subunit 27	-0.051850112597803	-0.00198514447885291	-1.87330502549208	0.0653450490868597	0.999463745446798	-4.01982479339764
3puJRZl63M7j9A8rpc	NDUFC2	NADH:ubiquinone oxidoreductase subunit C2	0.147851234848784	-0.0123286701576054	1.87284166990687	0.0654099909782641	0.999463745446798	-4.020489660576
TbdFZLBR4G0NJXU6r0	RALGPS1	Ral GEF with PH domain and SH3 binding motif 1	-0.128311165046271	0.00804030776993514	-1.87278385248121	0.0654180982320514	0.999463745446798	-4.02057261241147
lkllgASgL6gmqsocR4	MELTF	melanotransferrin	0.107349706414933	-0.0117781770751778	1.87231141550966	0.0654843758569841	0.999463745446798	-4.0212503427792
6xBl2p1iR5xhNxadxQ	DPP7	dipeptidyl peptidase 7	0.103115137526019	-0.032358020838531	1.87222033311695	0.0654971602035825	0.999463745446798	-4.0213809869121
rC.3F6nhvl_1oqn5Ks	MYDGF	myeloid derived growth factor	0.100343179470895	-0.0362584413205212	1.87190180951308	0.0655418847958165	0.999463745446798	-4.02183781756121
BKuv5XwggJ76hAhFiU	LGALSL	galectin like	-0.138365932804889	-0.0253245202158942	-1.87186494813988	0.0655470622427244	0.999463745446798	-4.0218906801945
ZN1eUlXBxXVSXUoHNQ	CD3EAP	CD3e molecule associated protein	0.127195986597176	0.0167858062948813	1.8715671859781	0.0655888977349109	0.999463745446798	-4.02231766515712
up5SEFJVZTE95FBDwk	HEATR5B	HEAT repeat containing 5B	-0.0798892258832668	-0.0151915286136288	-1.87083419463127	0.0656919786808615	0.999463745446798	-4.02336850495504
6fcKJSKiTr5CFWk1G4	RHPN1	rhophilin Rho GTPase binding protein 1	-0.187465451232137	-0.0352948800270472	-1.87016007132592	0.0657869014605609	0.999463745446798	-4.0243346293618
QlQR6ud31HEiDXggCo	KMT5B	lysine methyltransferase 5B	0.102366517122223	0.0143461823038567	1.87013628526013	0.0657902528677729	0.999463745446798	-4.02436871291825
xXpUsX_v0SCN3lKQpQ	METTL23	methyltransferase like 23	-0.0955372879861575	0.0296862685790818	-1.86964824637172	0.0658590482945303	0.999463745446798	-4.02506794979996
cNQpNBdtSkCCeui1eU	MRPL12	mitochondrial ribosomal protein L12	0.0862430604798084	0.0237864747345073	1.86932361036565	0.0659048435193724	0.999463745446798	-4.0255329823803
rrSTqTOwDtf96_Xdzk	TMED7	transmembrane p24 trafficking protein 7	-0.0701045129300543	-0.0507402075298773	-1.86846371895518	0.0660262749433234	0.999463745446798	-4.02676441027552
oo3h9L7kjBJOMDi2oU	REL	REL proto-oncogene, NF-kB subunit	-0.125226037632409	-0.059566806328406	-1.86778666218639	0.0661220195509998	0.999463745446798	-4.02773365395748
uDp57uvt3nnvkR6vkk	CHIC1	cysteine rich hydrophobic domain 1	-0.170931062247278	-0.00584318300122304	-1.8676823920144	0.0661367750922482	0.999463745446798	-4.02788289486995
Et3AR60eySsBHHcG6I	LCLAT1	lysocardiolipin acyltransferase 1	-0.100738731801158	0.000516144633729755	-1.8666550199055	0.0662823095145982	0.999463745446798	-4.02935297003097
WFhec1dOVJeH3riulQ	TBRG4	transforming growth factor beta regulator 4	-0.135088713785662	0.0554603835594453	-1.86416570791275	0.0666360566645453	0.999463745446798	-4.03291198829774
936Se__l1.A9x8Xi9I	MON2	MON2 homolog, regulator of endosome-to-Golgi trafficking	-0.0908730656579123	-0.048832510749677	-1.86415497789441	0.0666375849022828	0.999463745446798	-4.03292732014741
xe78OPPtT4l7Hef1MU	NUP54	nucleoporin 54	-0.0632130709443805	-0.0033237272016415	-1.86409084551357	0.0666467196607462	0.999463745446798	-4.03301895564816
EkruqvCR8.iuqu9F3c	ATF6B	activating transcription factor 6 beta	0.120480311978391	0.0404356602371297	1.86401608461594	0.0666573696330595	0.999463745446798	-4.03312577418567
QuP3P3lUSrCoYt96Ck	NAA60	N(alpha)-acetyltransferase 60, NatF catalytic subunit	-0.0922841999681437	0.00908491458316389	-1.86343512043752	0.0667401790086579	0.999463745446798	-4.03395572829048
QldEjlSXTJ4L5eDjXU	FLOT1	flotillin 1	0.090936501142709	0.0161938879015816	1.86287134740242	0.0668206207689691	0.999463745446798	-4.03476090522648
ZXRS59MxTjMN4CqSPA	LGALS3	galectin 3	-0.142877533055177	-0.0119436337788861	-1.86186950404822	0.0669637698006834	0.999463745446798	-4.03619120083281
lXV41buUUoqLpJzLek	ADGRE5	adhesion G protein-coupled receptor E5	0.10157047564312	-0.0129085244221888	1.86125159613912	0.0670521885793861	0.999463745446798	-4.03707302711441
ZeuIt4oyIf.3RTg7RU	GPATCH4	G-patch domain containing 4	-0.13467714520093	-0.0382720846940159	-1.86028898249741	0.0671901283290362	0.999463745446798	-4.03844627375373
xInUrevfdcClSnu6VY	ZNF626	zinc finger protein 626	0.115699230646424	0.00606767770210587	1.85918220068317	0.0673490219514214	0.999463745446798	-4.04002441301663
6ZCeV9SaesZiNmSh.A	HIST2H3A	histone cluster 2 H3 family member a	0.202479081029428	0.0478634137401289	1.8586287727837	0.067428592547715	0.999463745446798	-4.04081322444149
W.lXdFJboJSSzYndEs	TUBB	tubulin beta class I	0.0829069008547213	0.0319000594856399	1.85814168582094	0.0674986902087158	0.999463745446798	-4.04150730730491
oS1deCo3DUo74Oo8_U	PDCD10	programmed cell death 10	-0.0717023922526715	0.0182578229898492	-1.85787678199394	0.0675368387743584	0.999463745446798	-4.04188471909202
EindToKOBEzi0Kj5D0	C10orf88	chromosome 10 open reading frame 88	-0.0792403798714603	-0.0131603530860698	-1.85678327430493	0.0676945058292375	0.999463745446798	-4.04344215024329
KlZFRTpRL0knoKCOmU	FABP5	fatty acid binding protein 5	0.0847898332620729	0.0366781984819829	1.85511631604724	0.067935451172521	0.999463745446798	-4.04581476166415
QXnojsD_U4fXooSSTo	ZWINT	ZW10 interacting kinetochore protein	0.0831526111526665	0.043596839735564	1.85359807127839	0.0681555281776904	0.999463745446798	-4.04797406852264
r8oqKOwMlkQKrUEnf4	BTK	Bruton tyrosine kinase	0.0617249173124333	-0.0202673572783981	1.8531046223786	0.068227184918274	0.999463745446798	-4.04867553445746
EQVnVgBolVCwJEFeAg	TMEM254	transmembrane protein 254	0.0861992707104215	-0.0204659272894543	1.85298992899217	0.0682438493143918	0.999463745446798	-4.04883855405511
0rkBtARboKIAo6glYo	KIF26B	kinesin family member 26B	0.138085310919368	-0.0724569281687815	1.85248091334542	0.0683178481200495	0.999463745446798	-4.04956193653894
B7ZbXtVJefu1bivtDA	NDUFS7	NADH:ubiquinone oxidoreductase core subunit S7	0.0830446543024077	-0.00421945089231637	1.85175206134361	0.0684239233167782	0.999463745446798	-4.05059743149021
3KAqlJ97hh55IpK5L8	NR3C1	nuclear receptor subfamily 3 group C member 1	0.145602508276508	-0.0592641523663755	1.85148983165682	0.0684621213724712	0.999463745446798	-4.05096989848512
Zwaj.TpllUVk80e7jo	STRN4	striatin 4	0.110415457083418	0.00259279691245525	1.8513204821792	0.0684867994232075	0.999463745446798	-4.05121041509226
i4hf56K7U15z53ios0	TROVE2	TROVE domain family member 2	-0.0852525218093412	0.00975703694164272	-1.85076345527564	0.068568023578403	0.999463745446798	-4.05200138885495
ioJTIPnetAFCRFMl8E	DTL	denticleless E3 ubiquitin protein ligase homolog	0.100193395248015	0.038817341451052	1.85057932996589	0.0685948900246511	0.999463745446798	-4.05226279906483
QT2uE93VOEVIKpIIFE	CCNK	cyclin K	0.0727195008187717	-0.00841484869862799	1.85044972665783	0.068613806254951	0.999463745446798	-4.052446788381
3E_dFxLhtupmjuehis	TBCD	tubulin folding cofactor D	0.12142606573978	0.0411953149615429	1.85019241189417	0.0686513755790273	0.999463745446798	-4.05281204752008
x67fHV6CXgOroMmsKc	GATAD2B	GATA zinc finger domain containing 2B	-0.0808213103521509	-0.0255167411042885	-1.850074225617	0.0686686371950236	0.999463745446798	-4.05297979827605
N0_ivqCguKIC7378u8	HECA	hdc homolog, cell cycle regulator	-0.133950348677624	-0.0116160714682867	-1.84894173722114	0.0688342269546891	0.999463745446798	-4.05458674476848
H0ukdIE9E__5DTRRzU	DCTN1-AS1	DCTN1 antisense RNA 1	-0.136797877009978	-0.0330139627724315	-1.84840003164283	0.0689135523671782	0.999463745446798	-4.0553550913384
0k7uZulu3uz9xu7Z30	UBALD1	UBA like domain containing 1	-0.120407092619981	0.0301177646465882	-1.84784016821445	0.0689956174182519	0.999463745446798	-4.05614898353664
Z.1NUE_OCbSge7tyOw	UBE2H	ubiquitin conjugating enzyme E2 H	-0.0849623425244283	-0.00237727657313329	-1.8468364607634	0.0691429468011628	0.999463745446798	-4.05757171884162
fqm1HUATNFIuEH0ldI	ZSCAN26	zinc finger and SCAN domain containing 26	-0.0741577149219668	0.0189087715524708	-1.84680366824979	0.0691477647092629	0.999463745446798	-4.0576181900449
cZ3e3p7G3rvdDn.ckE	GAD1	glutamate decarboxylase 1	-0.179097424701766	0.0180871411429982	-1.84592596281524	0.0692768228312403	0.999463745446798	-4.05886174021813
r3tnR2VZ.d7dF9NR3k	FOXP4	forkhead box P4	-0.153247821598338	0.00575758532911322	-1.84566508086324	0.0693152219736957	0.999463745446798	-4.05923126206241
9IoSd4QKWxDlqCODuY	POTEG	POTE ankyrin domain family member G	-0.19271169581376	-0.0172804050057077	-1.84547812216188	0.0693427513633674	0.999463745446798	-4.05949604815079
ZqAoJKkuurt4BdIBME	ADH5	alcohol dehydrogenase 5 (class III), chi polypeptide	0.131482376268213	0.0331739904576552	1.84524602707672	0.0693769397882565	0.999463745446798	-4.0598247270424
WQuX3Ua5D0h9LjdS60	LRRFIP2	LRR binding FLII interacting protein 2	-0.0678920010563232	0.0260078024222473	-1.84502013892667	0.0694102274966523	0.999463745446798	-4.06014458094111
3SCWEKb0JgBOFniVOI	ATRX	ATRX, chromatin remodeler	-0.134461671217479	-0.070125752816908	-1.8448012890471	0.0694424908062576	0.999463745446798	-4.06045443573073
00iSA6pfpKDMkQKglw	MMS22L	MMS22 like, DNA repair protein	0.115049751597599	-7.73288343828181e-05	1.84421120058761	0.0695295456263638	0.999463745446798	-4.061289740175
0glrql9oCIiSngigYw	ATPIF1	ATPase inhibitory factor 1	0.0727854646362576	0.00378922277692724	1.84406464731162	0.0695511805949283	0.999463745446798	-4.06149715819297
cH5Lp4ECJOn4g0Co3k	HS2ST1	heparan sulfate 2-O-sulfotransferase 1	-0.0894709709159591	-0.0253309211763909	-1.84398438787757	0.069563031310827	0.999463745446798	-4.06161074382926
u1Nq5gH_ukKlClrqD8	LSM10	LSM10, U7 small nuclear RNA associated	0.0625386605245376	-0.00224356563143336	1.84357741317713	0.0696231492954851	0.999463745446798	-4.06218663971178
Nnhs.TpLQtQ6SbfbWo	DHX30	DExH-box helicase 30	0.0634814175747043	0.00981942577587245	1.84349082002461	0.0696359463928304	0.999463745446798	-4.06230916019004
N71TiXKNXuFdBOCOuM	LYPLA2P1	lysophospholipase II pseudogene 1	-0.122730746432487	0.0232343204531181	-1.84256865493716	0.0697723502911933	0.999463745446798	-4.06361361389049
H0N5V.0lcf_k9fqJdI	ZSWIM3	zinc finger SWIM-type containing 3	-0.100259128988987	0.0438420960912055	-1.84190759311185	0.069870270493894	0.999463745446798	-4.06454836714849
KlJUi0tTarxP1Ct55c	C1orf109	chromosome 1 open reading frame 109	-0.0731548468338394	0.00851382115478771	-1.84186911021705	0.0698759743470458	0.999463745446798	-4.06460277350875
NqRy5yyM8cV14oDSA4	FBXL3	F-box and leucine rich repeat protein 3	-0.127184998707119	0.0158296275000115	-1.84085252073149	0.0700267926285738	0.999463745446798	-4.06603964345908
f6UCIHEx5UvQiGoMVI	CENPJ	centromere protein J	-0.0831590344439826	0.0153849413728259	-1.84029043440197	0.0701102993137337	0.999463745446798	-4.06683380724012
Q57qrl9dJd6V36dI9A	KRBA1	KRAB-A domain containing 1	-0.115518120088512	-0.0246665610233407	-1.84013133082013	0.0701339517945561	0.999463745446798	-4.06705856344868
rap5L54gNE2CJ4Dsmk	GOLIM4	golgi integral membrane protein 4	-0.127344302662801	0.00371207795220488	-1.84006161883966	0.0701443173486735	0.999463745446798	-4.06715703601637
cNV8JUhN76heFVrT68	TRMT5	tRNA methyltransferase 5	0.0727648213412065	0.046289200246306	1.83973616234178	0.0701927268537974	0.999463745446798	-4.0676167201455
uUnkaFK9WQBPlJy4pM	DNAJA4	DnaJ heat shock protein family (Hsp40) member A4	-0.105928573462047	-0.00756633058063734	-1.83958640981389	0.0702150109657435	0.999463745446798	-4.06782821075009
WpFUi10HoXKoIKIzVE	HDAC8	histone deacetylase 8	0.104596351964213	0.0180132989686677	1.83941349426283	0.0702407492617655	0.999463745446798	-4.06807239477885
Bjfqvpf5OopK6p_jSw	B4GALT2	beta-1,4-galactosyltransferase 2	0.162696987481912	0.0409357519714946	1.83896137658961	0.0703080838953182	0.999463745446798	-4.06871076021863
N5AXsfU47qCuKeUKII	TMEM243	transmembrane protein 243	-0.0756271219652775	0.00692185597690101	-1.83881815494142	0.0703294254204095	0.999463745446798	-4.06891295238352
9F6uOdfqlcXIqHh.7U	LRRFIP2	LRR binding FLII interacting protein 2	0.0848206332271281	-0.00481140061294513	1.83856666776911	0.0703669127880413	0.999463745446798	-4.06926795391662
KwBAkFV.VcUcaAIkJ0	TAF1	TATA-box binding protein associated factor 1	0.151637955395131	0.00856503033104918	1.83828274983246	0.0704092545115911	0.999463745446798	-4.06966868334705
EAPPKeSKQijVeJUgvQ	ATG12	autophagy related 12	-0.112512046163739	-0.00391693046126128	-1.8375011042454	0.0705259345831171	0.999463745446798	-4.07077163593243
6Wf__7uHUCDlZngP6Y	GSTZ1	glutathione S-transferase zeta 1	0.0765540618426277	0.00762359918098507	1.83749742032248	0.0705264848840113	0.999463745446798	-4.07077683320313
6V38EQqV1_0_F8nAU4	MAPRE2	microtubule associated protein RP/EB family member 2	0.0797063306541132	-0.0111701167488721	1.83732116571556	0.070552817836534	0.999463745446798	-4.07102548205062
Kn2jl9iLrmGX37jnd4	BANF1	barrier to autointegration factor 1	0.0686377897690849	0.0478088989506692	1.83703201851529	0.0705960351277616	0.999463745446798	-4.07143334688307
9kpQkqQVRFfhMAk34I	C19orf48	chromosome 19 open reading frame 48	0.0658112259951312	0.0113081716870575	1.83697672388203	0.0706043022496677	0.999463745446798	-4.07151133783127
WObnWfQ4hBXuQlXrVA	IP6K2	inositol hexakisphosphate kinase 2	0.116718784587197	0.0237845372819349	1.83685899702665	0.0706219063410476	0.999463745446798	-4.07167738009719
c2UitWtWNCtSNL4S6Q	SRSF5	serine and arginine rich splicing factor 5	0.0697980393030786	0.0046093847119636	1.83655600586518	0.0706672305501439	0.999463745446798	-4.07210467629181
9jlZFNZxVjVdNCuDjE	RPS4X	ribosomal protein S4, X-linked	0.0565458663166752	0.0238995069790141	1.83624297078928	0.0707140828318967	0.999463745446798	-4.07254607145441
uXwdfXUIJe9u3uOTv0	EEA1	early endosome antigen 1	-0.107056660404911	-0.0399887105976475	-1.83443090962453	0.0709858078587419	0.999463745446798	-4.07509985925023
KVcNUkf_orQriSBF4o	CES2	carboxylesterase 2	-0.163314613695203	-0.0165973750713609	-1.83416517356658	0.0710257294106266	0.999463745446798	-4.075474180637
9K1yu4XjFFFf7pJFqc	TOR1B	torsin family 1 member B	-0.092809834671079	-0.00746638024945186	-1.83398817352021	0.0710523305828115	0.999463745446798	-4.07572347996225
3oIK9epTSzu_SJ0SUo	TTC13	tetratricopeptide repeat domain 13	-0.0738600710130016	-0.0324853134124278	-1.83334811783937	0.0711485936536478	0.999463745446798	-4.07662480155432
fpfXCUxULETMkT9FQo	SUOX	sulfite oxidase	0.106048207763883	0.000938071994655192	1.83300920521497	0.0711996096630253	0.999463745446798	-4.07710194289561
HeOfR_R3Ceg1Ad6.t0	CDC26	cell division cycle 26	-0.0678536590772876	-0.00811439964310283	-1.83287438367663	0.0712199126676698	0.999463745446798	-4.07729173094403
BlyUvclXtd8jM1V.eo	PRKAG1	protein kinase AMP-activated non-catalytic subunit gamma 1	0.0705118370957848	0.0420822741448184	1.83248973899755	0.071277863629253	0.999463745446798	-4.07783312661997
BeU4JL957H6OLUOV6o	GTF2H5	general transcription factor IIH subunit 5	-0.0540364614902785	0.0220763610091935	-1.83175466202166	0.071388720982339	0.999463745446798	-4.07886748325403
6.oeiCoppqYJkbYmqg	PAIP2	poly(A) binding protein interacting protein 2	0.156979104026539	0.0159006318985322	1.83167537506472	0.0714006869167959	0.999463745446798	-4.07897902917669
0oKJHocttHFf.o9KnU	ACAP2	ArfGAP with coiled-coil, ankyrin repeat and PH domains 2	0.077228869703267	0.0132052482751505	1.83097223883244	0.0715068773103194	0.999463745446798	-4.07996805862872
c7dQX7kfnNz3u55JeI	LNPK	lunapark, ER junction formation factor	-0.101958443008195	-0.0131730905396423	-1.83095658572788	0.0715092428081903	0.999463745446798	-4.07999007241257
TbinVSUSVXfH5fAHog	RNF216	ring finger protein 216	-0.0622047338424283	0.0118208470028698	-1.830847038947	0.0715257993574084	0.999463745446798	-4.08014412914165
Eh7HeKUAlItpXgZUYc	CXorf40B	chromosome X open reading frame 40B	0.107297126122417	-0.00465346509694463	1.8307115279492	0.0715462844979401	0.999463745446798	-4.0803346883052
oFVEhVvXUl5uVcF6f8	APOBEC3C	apolipoprotein B mRNA editing enzyme catalytic subunit 3C	0.0832755142513125	0.0267208218813913	1.82951739930795	0.0717270129747518	0.999463745446798	-4.08201336326246
0pU5eyxec_sKeK6CvQ	POLR3A	RNA polymerase III subunit A	-0.111941937251966	0.00485957976579366	-1.82900023321484	0.0718054033805114	0.999463745446798	-4.08274008060892
EXKDdeoNzVwoMAJlJE	ZFP1	ZFP1 zinc finger protein	-0.114451662761557	-0.0252706705758236	-1.82871189710013	0.0718491396023579	0.999463745446798	-4.08314516896184
9vqgijCvM3KEHf4vrU	ZC3H7A	zinc finger CCCH-type containing 7A	0.10650660939952	-0.0426161177260079	1.82809980565958	0.0719420585503528	0.999463745446798	-4.08400491905982
0cMC6mYiinnu79eVSU	ASL	argininosuccinate lyase	-0.149682168823704	0.0435918300133473	-1.82773326623603	0.0719977494643576	0.999463745446798	-4.0845196420528
3ioggwJJ5eiXPRzvz4	TUBA4A	tubulin alpha 4a	0.0695941068327526	-0.00153688449783675	1.827699976178	0.072002809244701	0.999463745446798	-4.08456638599284
uo4qR7mizrR4oPQ6SY	CENPV	centromere protein V	0.0952222531418567	0.00677242557782604	1.82699125738608	0.0721105985914459	0.999463745446798	-4.0855613481044
leKQlOi4hUoloR90oA	THY1	Thy-1 cell surface antigen	-0.211104224309427	-0.00117111551133763	-1.82678132832439	0.0721425527152263	0.999463745446798	-4.0858559994005
u57Ge5moFG4Dm_KX54	RFXANK	regulatory factor X associated ankyrin containing protein	0.0617277309304629	-0.00249143386789089	1.82667131923864	0.072159302361535	0.999463745446798	-4.08601039347392
Eqj_iqkpAtAuDhd7UU	SNAPIN	SNAP associated protein	-0.0870277351918335	-0.022726938767128	-1.82664813234967	0.0721628331415726	0.999463745446798	-4.08604293444529
ce6qKdK7eiqv7l4wbA	ARSA	arylsulfatase A	-0.138399013555264	-0.0401095185976938	-1.82660337012994	0.0721696497109652	0.999463745446798	-4.086105753657
oePsl64pe.yH3heyJ4	CD27-AS1	CD27 antisense RNA 1	-0.0837340991514829	0.0100790704334708	-1.82500698248419	0.0724131066278684	0.999463745446798	-4.08834522843726
c1F1N9.kl6unOrH26U	MYL2	myosin light chain 2	0.159575067243764	-0.0222612890636769	1.82356256574801	0.0726339791953037	0.999463745446798	-4.09037001591978
o1atHo1557DqBV1VPw	PPP2R1A	protein phosphatase 2 scaffold subunit Aalpha	0.0660953025187205	0.0189977960056536	1.82332702783306	0.0726700498108322	0.999463745446798	-4.09070005878132
NlJfXQg5SEuhIgk5CE	UBE2T	ubiquitin conjugating enzyme E2 T	0.0663880109399587	-0.00868185206548688	1.82258554518539	0.0727836994035828	0.999463745446798	-4.09173879979151
BeoECrURUkUeJC.uJI	CDK5RAP2	CDK5 regulatory subunit associated protein 2	0.108474421531544	0.0255144491710173	1.8219928151474	0.0728746560842586	0.999463745446798	-4.0925688840852
lsSNUnzpfhUltdEjlo	SPSB1	splA/ryanodine receptor domain and SOCS box containing 1	0.171493668750241	-0.00164303205816112	1.82173811892757	0.0729137693870525	0.999463745446798	-4.09292549789161
lLRS6eSCpRXJf8Hn_0	ENKD1	enkurin domain containing 1	0.0773782236844895	-0.0314228682793459	1.8211388293959	0.0730058706258257	0.999463745446798	-4.09376442073163
6Qsu3tJXfB3uRlc.S0	PPIL1	peptidylprolyl isomerase like 1	0.0650818240738925	-0.00844450125247164	1.82073378990275	0.0730681738268278	0.999463745446798	-4.09433128154572
feXQteRt1eoQC_ullw	MOSPD3	motile sperm domain containing 3	0.120613425167854	0.073321551365716	1.82058968766078	0.0730903503654425	0.999463745446798	-4.09453292850914
ZfczqFYPIR54NexJfE	DEGS1	delta 4-desaturase, sphingolipid 1	-0.053209094548935	0.03282348193011	-1.82058129015495	0.0730916428687436	0.999463745446798	-4.094544678976
HSqDURJWdUonDrIm18	IL17RA	interleukin 17 receptor A	0.125531916171934	0.0141406842400825	1.82049762201701	0.0731045217061523	0.999463745446798	-4.09466175154975
0wizN6dfhSQ2leolFI	MYO1C	myosin IC	-0.11492662865357	-0.0126452712167578	-1.82025122376777	0.0731424602275782	0.999463745446798	-4.0950064963625
00K3OeGXV631V5_6eA	DHPS	deoxyhypusine synthase	0.0586462924121918	0.00166994770335585	1.81952855716299	0.0732538258938936	0.999463745446798	-4.0960173668162
WqsSur1dN6L1V0MCQo	HDAC11	histone deacetylase 11	-0.187970195645019	0.0772233730479508	-1.81949048283974	0.0732596972215868	0.999463745446798	-4.09607061553214
WgdUA7JC1JV5TKVKfY	SYCE2	synaptonemal complex central element protein 2	0.161406003589556	-0.0080314665970057	1.81941641949271	0.0732711194364427	0.999463745446798	-4.09617419374245
ZCNuyPqvqio4KmLg3A	TOP1	DNA topoisomerase I	-0.145464445805703	-0.0629727087848888	-1.81852774926936	0.0734082883165746	0.999463745446798	-4.09741671462621
cRZUlZZWvlOmGW2ZRo	CYB561	cytochrome b561	0.134127325366587	0.0608010926022859	1.81781826028634	0.0735179541154732	0.999463745446798	-4.09840832104909
lLpe54IukICShoq4Ec	TIPRL	TOR signaling pathway regulator	-0.0736733812592015	0.0241598002694059	-1.81778343845541	0.0735233400543894	0.999463745446798	-4.09845698040489
fKOS0UHEB6XoLEtNGU	TTC21A	tetratricopeptide repeat domain 21A	-0.159722651717049	0.0122456466362006	-1.81774105617073	0.073529895823819	0.999463745446798	-4.09851620347663
ZuYFknlDklnqnngDl8	SCAMP3	secretory carrier membrane protein 3	-0.113175434307618	-0.0111078856681582	-1.81763951324591	0.0735456046574631	0.999463745446798	-4.09865808994192
Evziop8AN6g7F.hdek	METTL18	methyltransferase like 18	0.0960560453622676	0.0403672983535602	1.81704390763207	0.0736378021867034	0.999463745446798	-4.09949019111959
rQdHl56Cd7qDSOAfio	PRKAG1	protein kinase AMP-activated non-catalytic subunit gamma 1	0.0940103511372525	0.0409575776778145	1.81676194977382	0.0736814818955001	0.999463745446798	-4.09988402080607
lVyKI9IJEFEkIkXp40	CYB5A	cytochrome b5 type A	-0.0813587577125119	0.0169210875415777	-1.81625376940666	0.0737602617224932	0.999463745446798	-4.10059369379035
NpQJE5KdevvXdAXueE	FBN2	fibrillin 2	0.177441225287356	0.00173986817861766	1.81512933073952	0.0739348262294617	0.999463745446798	-4.10216334377816
695JOXVUTdMkUr7t4U	RAPGEF6	Rap guanine nucleotide exchange factor 6	0.0898168388136721	-0.0180732844693109	1.81324308602797	0.0742284332846984	0.999463745446798	-4.10479449115661
lnd5da0d_e65xuguDo	PSMD7	proteasome 26S subunit, non-ATPase 7	-0.0621091985700042	0.0148634456768067	-1.81294228298484	0.0742753452981736	0.999463745446798	-4.10521386059289
3jsLpUVQ.7BOOQu3pE	PDS5A	PDS5 cohesin associated factor A	0.0797658197301793	-0.0140308741188785	1.81232772205298	0.074371266704713	0.999463745446798	-4.1060704685341
iXu4qRBSlGoX3Nd7P4	GSS	glutathione synthetase	0.0772534743137406	0.00115795599246175	1.81097687838848	0.0745824717254413	0.999463745446798	-4.10795243984222
ETs2gfIHrqZrp35ew0	KIAA0408	KIAA0408	-0.165452298233933	-0.00969661608080899	-1.81097400745899	0.0745829211294403	0.999463745446798	-4.10795643824222
QWfV71YH94UIq49S94	PELO	pelota mRNA surveillance and ribosome rescue factor	-0.0774075650313555	0.0048132433769852	-1.810308123307	0.0746872171215606	0.999463745446798	-4.10888367604487
ipXV5HVd_ebvj_ikeQ	ATP6V0B	ATPase H+ transporting V0 subunit b	-0.0601877857275243	-0.0411738432276843	-1.81005877545267	0.0747263032643061	0.999463745446798	-4.10923081274825
rcpUleCN7kZNB3eCg0	PHC3	polyhomeotic homolog 3	-0.0803289079136734	-0.00994584097559766	-1.80996342857307	0.0747412537326932	0.999463745446798	-4.10936354138576
ru.AIIQAeBQB36qiq4	FGF18	fibroblast growth factor 18	-0.175898809277803	0.00450105993998564	-1.8093603680802	0.0748358719757139	0.999463745446798	-4.11020289421586
iukJL3.SSP_VHPXeJ4	CD93	CD93 molecule	-0.251630514494386	-0.017135508390694	-1.80852278542086	0.0749674518787635	0.999463745446798	-4.11136824772269
ZksO7NIwgkegBY23co	ROCK1	Rho associated coiled-coil containing protein kinase 1	-0.12691430515469	-0.011337905270161	-1.80833043272174	0.0749976967473306	0.999463745446798	-4.11163580599833
Z_jed10kNIJ_Ad6F6k	NLRP7	NLR family pyrin domain containing 7	0.157461701240378	-0.0193268186121973	1.80756565956532	0.0751180477911851	0.999463745446798	-4.11269933800852
o7XUiS46KAxSVKCSSo	ZNF655	zinc finger protein 655	-0.121905269088933	0.00956721952895957	-1.80745760070507	0.0751350658201265	0.999463745446798	-4.1128495778477
KvXBQtJdIlKKh7ovPk	RFX3	regulatory factor X3	-0.183180958388341	-0.0374028925057736	-1.8068538833945	0.0752302035832384	0.999463745446798	-4.11368881041638
f7RJH0gDEQSVfeVWRI	RAI14	retinoic acid induced 14	-0.16137711582679	-0.0155132582283432	-1.80630319834072	0.0753170718331494	0.999463745446798	-4.11445410501285
BVIKgJ7FL5wXt_.SiU	KCTD3	potassium channel tetramerization domain containing 3	0.0861036244202285	0.00551137971072976	1.80624867264824	0.0753256775843815	0.999463745446798	-4.11452986883293
Te_l.fJf.e.U9LnUJk	POLE3	DNA polymerase epsilon 3, accessory subunit	-0.0709511566343078	0.049349744773788	-1.80531021000865	0.0754739231218622	0.999463745446798	-4.11583355033245
ZhAGpmOOV6f0q60geg	TICAM1	toll like receptor adaptor molecule 1	-0.132611641134693	-0.0258965917946902	-1.80490821152636	0.0755374997968343	0.999463745446798	-4.11639180911783
0KVgI1U009lvF5SOok	POLR2F	RNA polymerase II subunit F	0.052857643910659	0.0110383930299578	1.80410118771444	0.0756652667429408	0.999463745446798	-4.11751219631938
WJBSL9T2gr1eQCpEiU	BCL7C	BCL tumor suppressor 7C	-0.0943558142394503	0.0340287702320759	-1.80306658571513	0.0758293272347382	0.999463745446798	-4.1189478773113
TO4VKMSLvntdKitY3o	KHK	ketohexokinase	-0.134930440086377	0.0174488141759663	-1.80301789729774	0.0758370552335048	0.999463745446798	-4.11901542247663
Wfngr16dTZH17UhHrs	TAF6	TATA-box binding protein associated factor 6	-0.134611088147387	-0.0372918653475615	-1.80238540515141	0.0759375063464251	0.999463745446798	-4.11989272780301
rnn4LSB546IQKRgLsY	SF3B1	splicing factor 3b subunit 1	-0.154399608550071	0.00856456766746429	-1.80216138645272	0.0759731111410518	0.999463745446798	-4.12020338978535
WXTp3pEuw1KrsjqoHs	BAK1	BCL2 antagonist/killer 1	0.15147977971826	-0.0232151555163579	1.80061508206767	0.076219255572526	0.999463745446798	-4.12234681835523
rTS8juqHQ0RnfQtadU	FILIP1	filamin A interacting protein 1	-0.0989980471082858	0.0665750773086866	-1.80055783919394	0.0762283803785093	0.999463745446798	-4.12242613483555
uuXdJb4_wfwLVOv_i4	DUS4L	dihydrouridine synthase 4 like	0.0673088723872681	0.0277867970766614	1.80031397892128	0.0762672631551745	0.999463745446798	-4.12276400570421
cqCIvTSoePGyiIY5Ko	ZNF766	zinc finger protein 766	0.108725063727369	-0.0100848954142034	1.79970131248954	0.076365023913642	0.999463745446798	-4.12361268155297
QooKh.og6B34ofyUrs	CCDC126	coiled-coil domain containing 126	-0.0970718402334183	0.0221096245850865	-1.79924237014686	0.0764383239465953	0.999463745446798	-4.1242482478027
TS046XkdREOQSLgIko	SMA5	glucuronidase beta pseudogene	0.114637669100426	0.0491478498139834	1.79843108396937	0.0765680420937859	0.999463745446798	-4.12537140445756
TWh1X_8TkT.U_8XY5A	CSPP1	centrosome and spindle pole associated protein 1	0.0819251745288313	0.00415797814282181	1.79778549548183	0.0766713975619053	0.999463745446798	-4.12626484462574
cXl5GX0sHWJIDRN_VE	SPATA13	spermatogenesis associated 13	-0.15741794463184	0.0121066297549505	-1.79777324805132	0.0766733594371824	0.999463745446798	-4.12628179127973
ugIDiSf6MOGEkFYISo	ZNF226	zinc finger protein 226	0.0928300022867862	0.01699792214929	1.79768337183899	0.0766877576896341	0.999463745446798	-4.12640614900218
Qb64lgvAXAnNV6N.ck	DDX5	DEAD-box helicase 5	0.183799678300158	0.044027463881882	1.79717135480526	0.0767698262832945	0.999463745446798	-4.12711449865457
95SDsvlNI.j7gQoeHk	TMEM167A	transmembrane protein 167A	-0.089785836242486	-0.0177599950579702	-1.79654552976596	0.0768702359664355	0.999463745446798	-4.12798005196523
NV50BEuqNIgCqegKqg	TBX21	T-box 21	-0.138863258908958	0.00254141308727941	-1.7965343633776	0.0768720285362802	0.999463745446798	-4.12799549330851
QUtxFKXdQohL08.KLg	GAN	gigaxonin	-0.13805688218124	-0.0227848053685686	-1.79603282395836	0.0769525779081259	0.999463745446798	-4.12868895463591
BlxxEXKc.rMl7616rE	MCOLN3	mucolipin 3	0.104652932868086	0.0173120871166605	1.79578902257641	0.0769917588445044	0.999463745446798	-4.12902598816568
fiBrp1RKENnlVQXbJA	PPP1R14B	protein phosphatase 1 regulatory inhibitor subunit 14B	0.0641061431476118	-0.00201435547810165	1.79487226209944	0.0771392387613314	0.999463745446798	-4.13029296263207
rkgiru.gNNotJSie0U	DAPK1	death associated protein kinase 1	-0.0885713507841703	-0.0118188142743821	-1.79424224142694	0.0772407270143672	0.999463745446798	-4.13116332509748
ukoevq3qjc6TUIS4R0	OASL	2'-5'-oligoadenylate synthetase like	0.0915605866292641	-0.0505775017420298	1.79394199020757	0.0772891327541398	0.999463745446798	-4.13157802112715
fclcj.osAVfSR_FgMU	HNRNPH3	heterogeneous nuclear ribonucleoprotein H3	0.0744664184943747	0.0159759443493251	1.79384885458895	0.0773041529755743	0.999463745446798	-4.13170664408597
H99XUIkAXqQqh8eLqo	STK16	serine/threonine kinase 16	-0.108699969331219	0.0341435449566122	-1.79383020561904	0.0773071608351786	0.999463745446798	-4.13173239813329
reQSX3jpTgKELOiOAk	TRAPPC6B	trafficking protein particle complex 6B	0.124247339677113	0.0168743896762085	1.7936094810228	0.077342768522596	0.999463745446798	-4.13203719855597
Q7LRJx2opYrqKt94lQ	ERGIC1	endoplasmic reticulum-golgi intermediate compartment 1	0.18362191144173	-0.015656224238089	1.79252564599395	0.0775178130018621	0.999463745446798	-4.13353339056367
9d9Hy2E04DESigZfWA	ZFP69	ZFP69 zinc finger protein	-0.109897925527558	0.00721214170429889	-1.79237093448297	0.077542826527959	0.999463745446798	-4.13374689807238
idEulOq7argqe1Scfs	TPRN	taperin	0.0961081970671649	-0.001549510492546	1.79131134697732	0.0777143197551419	0.999463745446798	-4.13520872611436
3Aiun8iqluiiREiun8	METTL14	methyltransferase like 14	-0.114592336267843	0.0334016129396534	-1.78958359171956	0.0779946324608178	0.999463745446798	-4.13759071990465
EbBFAwVVILJSKUv4E0	MGME1	mitochondrial genome maintenance exonuclease 1	0.056510494940407	-0.00762521006804896	1.78948151793408	0.0780112193059702	0.999463745446798	-4.13773138127194
o1XnH_AUgDDh6U9vE0	IGF1	insulin like growth factor 1	0.144747886624603	0.0307622632188773	1.78930059539605	0.0780406261752351	0.999463745446798	-4.13798068150444
ZdAgvESX6eCQHlwCiU	GIMAP2	GTPase, IMAP family member 2	-0.103235035942042	-0.051346268579238	-1.78808989437673	0.0782376491732096	0.999463745446798	-4.13964837560784
6TxQp.yDkv3T_e6E4U	SNORA32	small nucleolar RNA, H/ACA box 32	-0.156791740759529	-0.0662981705886117	-1.78770354848475	0.0783006080834202	0.999463745446798	-4.14018034047771
HiTqPjaSQiwIRJ1IpU	MRPL38	mitochondrial ribosomal protein L38	0.0680468817666129	0.0336607649650075	1.78754503264122	0.0783264520124606	0.999463745446798	-4.14039857343794
NGpdb_6JZ58H03r154	GET4	golgi to ER traffic protein 4	0.0810447785627311	0.0238424638430172	1.78715339610153	0.0783903336441024	0.999463745446798	-4.14093767588245
Boq4S6WVClRifvf738	CCR7	C-C motif chemokine receptor 7	-0.105688772290228	0.0228494505035048	-1.78669981585707	0.0784643733662057	0.999463745446798	-4.14156191457485
BSQ3rVS2RB9UTFSKIk	PIGN	phosphatidylinositol glycan anchor biosynthesis class N	0.0799824517442285	0.0281114068729337	1.78657857770473	0.078484173406676	0.999463745446798	-4.14172874436011
9keH4VRC6APVRWEX_c	SEPT10	septin 10	-0.133734901444193	0.0632969498968421	-1.78652315899839	0.0784932255113466	0.999463745446798	-4.14180499992191
iFenouojznUse.1Gno	PRIM1	DNA primase subunit 1	0.0705046830264455	-0.0102591746291799	1.78632450379893	0.0785256810361902	0.999463745446798	-4.14207833007675
ifuf5f4A58DpThXfXk	VPS13A	vacuolar protein sorting 13 homolog A	-0.114880482010019	-0.0206002285308989	-1.78606082713279	0.0785687767611706	0.999463745446798	-4.14244108156876
xvA5rskC86refipHBc	BANK1	B-cell scaffold protein with ankyrin repeats 1	0.16423814369353	-0.0171166014542406	1.78588914675326	0.0785968470439374	0.999463745446798	-4.14267724409542
usqrl11eiDHuheRP1A	IRF3	interferon regulatory factor 3	0.0623896653981919	0.0172240750805724	1.78515546264733	0.0787169007256576	0.999463745446798	-4.14368626759429
u55QF4qe6roOJ6CluM	PCBD1	pterin-4 alpha-carbinolamine dehydratase 1	0.081234298667889	0.0416861441802407	1.78507684592659	0.0787297739241912	0.999463745446798	-4.14379436592978
HntIF2IkgTiAdInehY	ALCAM	activated leukocyte cell adhesion molecule	-0.0761641653463272	0.0118760669147507	-1.78486468575674	0.0787645231098314	0.999463745446798	-4.14408606590865
lAZSt5e9_epDp46eUs	ABR	active BCR-related	-0.0611914096935229	0.00526488259226629	-1.78448714908814	0.0788263904463634	0.999463745446798	-4.14460506633171
NJQtGpKWS69_bpev88	TMEM175	transmembrane protein 175	0.0839767589538787	-0.059503395183015	1.78351641810328	0.0789856507388434	0.999463745446798	-4.14593908268616
c82nKbrrk5ew3aCnik	MBD4	methyl-CpG binding domain 4, DNA glycosylase	-0.133110747218046	-0.0514078462441194	-1.78346993421035	0.0789932836981311	0.999463745446798	-4.14600294642284
HkRuSXM6gBfV3sXl0A	LRP5L	LDL receptor related protein 5 like	-0.0995453829884548	0.011288629444196	-1.78329721771737	0.0790216502496823	0.999463745446798	-4.14624022681024
TpU8h7_SpNHn1V4RdE	GINS3	GINS complex subunit 3	0.0792883341625181	0.0698346879056216	1.78329515062982	0.0790219897945766	0.999463745446798	-4.14624306648058
BuuRF7LV8dXrp4pPNU	NFYB	nuclear transcription factor Y subunit beta	-0.138159356009697	-0.0188349679633456	-1.78281384152818	0.0791010838469597	0.999463745446798	-4.14690418698843
HlSlJICSdILPvnTruk	ANKS1A	ankyrin repeat and sterile alpha motif domain containing 1A	-0.0804102745948236	-0.0221633322865377	-1.78120492679877	0.0793659564713304	0.999463745446798	-4.14911301789603
rYXxMoogx_CSznnuvI	KCNK1	potassium two pore domain channel subfamily K member 1	-0.0935854355025731	-0.0397151614178307	-1.78104957200453	0.0793915712258209	0.999463745446798	-4.14932620566651
lefnKdDxR97_f7o16g	METTL1	methyltransferase like 1	-0.0709750694810505	0.00429993976471218	-1.78095234383486	0.0794076056120155	0.999463745446798	-4.14945961993101
uOq6EEW0haiFKknfRI	HJURP	Holliday junction recognition protein	0.0893895034945521	0.0558637827496297	1.7808490674146	0.0794246403935994	0.999463745446798	-4.14960132634992
cVFINwkv9FV0gFHtPI	DMTF1	cyclin D binding myb like transcription factor 1	-0.0964204019909765	0.00640084509792522	-1.78015694971924	0.0795388791584974	0.999463745446798	-4.15055079748928
fuSNSoBStRRdp6c_fg	EIF2D	eukaryotic translation initiation factor 2D	0.0648770851929796	-0.00911484210242918	1.77962834272922	0.0796262213093254	0.999463745446798	-4.15127573716355
ifU9_0_tDKoqyPJ51I	NT5C2	5'-nucleotidase, cytosolic II	-0.0506390776412379	0.015670148970764	-1.77893764130165	0.0797404665483448	0.999463745446798	-4.15222268611835
uAA3BHpxVnahV9RnuA	FAM104B	family with sequence similarity 104 member B	0.124744257891964	0.00586418255514077	1.77862473875305	0.0797922668989704	0.999463745446798	-4.15265156632968
ioNfvl44c7r1X4eghE	N4BP2L2	NEDD4 binding protein 2 like 2	-0.0925643065246508	-0.00757015072949706	-1.77832388523203	0.0798420989204767	0.999463745446798	-4.15306386804332
Tkie_jd7tejvh5fg.U	CCNE1	cyclin E1	0.113075750033223	0.0602126756777361	1.77689631973687	0.0800789069907591	0.999463745446798	-4.15501941252442
EKefAJOBWo5Ikn.uRo	SNAP29	synaptosome associated protein 29	0.0795673999025079	0.00361597107112512	1.7767363088782	0.0801054863091987	0.999463745446798	-4.15523851535371
3Svt5P767C4E00S814	SMNDC1	survival motor neuron domain containing 1	-0.0658588455296509	0.0205576397783381	-1.77616677191895	0.0802001512555316	0.999463745446798	-4.15601823926052
o.erexakdxenB6NKaw	KDELR3	KDEL endoplasmic reticulum protein retention receptor 3	0.139477983944456	-0.0148429281277938	1.77599548349522	0.0802286399359609	0.999463745446798	-4.15625269782894
r7f.UuU0FF0CEevNIo	LRRC37BP1	leucine rich repeat containing 37B pseudogene 1	0.129702846630331	0.0270179606789334	1.7758676133881	0.0802499127631719	0.999463745446798	-4.15642771250707
9qaT8R7kLPiCLkwISo	MOB1B	MOB kinase activator 1B	-0.139595609226591	0.00835848227553471	-1.77575591718079	0.0802684986883346	0.999463745446798	-4.15658058090763
Tl6K7grns1aA3N6Feg	FHOD1	formin homology 2 domain containing 1	0.0657965918120864	0.0121902693928063	1.77532664028032	0.0803399623941689	0.999463745446798	-4.15716801311824
r6LcBqko3uUAiXd1os	WHAMM	WAS protein homolog associated with actin, golgi membranes and microtubules	-0.126108084485616	0.0166809961464718	-1.77458857682611	0.0804629547325473	0.999463745446798	-4.15817769941498
Hua3_911uAB7tYgR2o	PDGFA	platelet derived growth factor subunit A	-0.163899488820718	-0.0213598870038024	-1.77439164642643	0.0804957980100114	0.999463745446798	-4.15844704098281
NeUv3for6T7AooEnwo	EIF1B	eukaryotic translation initiation factor 1B	-0.0759438653078754	-0.0331153624710296	-1.77432180380868	0.080507448760641	0.999463745446798	-4.15854255827043
BqfA3QH_8osEom54mo	FAM210B	family with sequence similarity 210 member B	0.165604356672147	0.0429953695704481	1.77396731338307	0.0805666044390041	0.999463745446798	-4.15902731027361
r5eFFx7DkgkfinTfkQ	ZNF654	zinc finger protein 654	-0.115812990267465	0.0145866492983005	-1.77215165824699	0.0808701583860384	0.999463745446798	-4.16150879270646
KU6Ur5couq1HjgCK78	P3H2	prolyl 3-hydroxylase 2	-0.0868063082245405	0.0453447376928533	-1.77190579275169	0.080911336786445	0.999463745446798	-4.16184464621373
9UTDTv0tJDqUzK_slU	ZNF791	zinc finger protein 791	-0.0891233491403321	0.00514912819925604	-1.77090647418121	0.0810788852554212	0.999463745446798	-4.16320929203681
xl1CD9BdBNF6nlL90k	ATRN	attractin	-0.143645239284398	0.0481686106442352	-1.76930201685602	0.081348495091164	0.999463745446798	-4.16539886254543
6n6Sz9J6eig_iApVBQ	PGM3	phosphoglucomutase 3	-0.0948883107741454	-0.00647013116873817	-1.76908748045305	0.0813846016760281	0.999463745446798	-4.16569150164569
KZIFfxez16EKXIgYnk	PLEKHG1	pleckstrin homology and RhoGEF domain containing G1	0.121063446256964	-0.041689418523423	1.76905614373768	0.0813898767736779	0.999463745446798	-4.16573424394364
H3JK7rKJGVSCsg7rqs	TRNAU1AP	tRNA selenocysteine 1 associated protein 1	0.134408254034158	0.0255176503148908	1.76834190069693	0.0815101865280206	0.999463745446798	-4.16670826564201
QpPxv3eOdX4JTIPyqc	CSNK1G2	casein kinase 1 gamma 2	-0.0523873535995584	-0.00156034879973231	-1.7682887252431	0.0815191494963601	0.999463745446798	-4.16678076758137
QZqNfuSoInlepF6RRA	PDE9A	phosphodiesterase 9A	0.196082299405755	0.00912419982784903	1.76822386971797	0.0815300823012451	0.999463745446798	-4.16686919204765
WEio37sV9FSXVUOkE0	C5AR1	complement C5a receptor 1	-0.133115255196379	-0.0222169775520035	-1.76793015769943	0.0815796090565671	0.999463745446798	-4.16726960474019
N3VAwjuefFis0arqnU	ERAP1	endoplasmic reticulum aminopeptidase 1	0.161405940624876	-0.00413622675290074	1.76574368573151	0.0819490845038711	0.999463745446798	-4.17024851701168
il453eMnuUwufuKz_Q	REV1	REV1, DNA directed polymerase	-0.087571527082067	0.0175371591889532	-1.76571408209116	0.0819540965045936	0.999463745446798	-4.17028882725471
0KSAfVflH1AQF2lVNU	LCP2	lymphocyte cytosolic protein 2	-0.117955675439525	-0.0407607639661153	-1.7643783907284	0.0821804983310605	0.999463745446798	-4.172106962954
BoqNO4vpcfELLgL1f8	PRMT6	protein arginine methyltransferase 6	0.0739692013645571	-0.0150251509137938	1.76355475746996	0.0823203637350996	0.999463745446798	-4.17322747488567
3IBLuikpmNJYHcqH64	FOXN3	forkhead box N3	-0.0585776113911797	0.0148260011003494	-1.76340279500311	0.0823461908110778	0.999463745446798	-4.17343416112008
6e5enz9HSTDuRavRU4	PARP3	poly(ADP-ribose) polymerase family member 3	0.0750550290214778	-0.0059993198758519	1.76305774704069	0.0824048590448725	0.999463745446798	-4.1739034064512
01kigeOLuQ_IkyS6SU	CTSC	cathepsin C	0.0676998293428693	0.0192267762827701	1.76272128691851	0.0824621004498477	0.999463745446798	-4.17436089374492
ZH57tQtQNeCiGaiVGg	FIS1	fission, mitochondrial 1	0.0716725895764982	-0.00802397817491882	1.7626068259656	0.0824815810129337	0.999463745446798	-4.17451650934275
9rI7U5U7nXnqHQ9Kc4	LONP2	lon peptidase 2, peroxisomal	-0.0644064808021874	-0.0141214003677485	-1.76136350021134	0.0826934333603984	0.999463745446798	-4.1762062929199
ERnd6rhyNRKBQBkv1A	TANGO6	transport and golgi organization 6 homolog	-0.112902672143181	0.0667865179004461	-1.76097087683748	0.0827604267021999	0.999463745446798	-4.17673967933939
uHsBTr1JJe9RFVEU0o	AVPI1	arginine vasopressin induced 1	0.0919746366571326	0.0045939329054455	1.7602043942748	0.0828913412287863	0.999463745446798	-4.17778065418315
TThQRqghCmgqnpw7ks	ARMC9	armadillo repeat containing 9	-0.148984065953698	0.0207282512296716	-1.75995560727134	0.0829338706831425	0.999463745446798	-4.17811844949715
KilXCek0FUpRnZ39fU	MTA2	metastasis associated 1 family member 2	0.0701225106533029	0.0050366817733304	1.75981652186287	0.0829576548275249	0.999463745446798	-4.17830727675809
9CuQfX2ttWDWr01hFI	RPL12	ribosomal protein L12	0.0501312785735548	0.0149379700076909	1.75795321092434	0.0832768334381202	0.999463745446798	-4.18083568594811
BJ5iJ4gpjp4KFKJ4lc	NDUFB6	NADH:ubiquinone oxidoreductase subunit B6	0.0870985353998742	0.0146175221397365	1.75761245054831	0.0833353143440419	0.999463745446798	-4.18129781958986
iboTyRI7SCAWgXUghI	MRPL42P5	mitochondrial ribosomal protein L42 pseudogene 5	-0.14712999247434	0.00607493066110745	-1.7575141684263	0.083352187726375	0.999463745446798	-4.18143109329971
TRRClOjuqtz1ISHwqc	ZBTB38	zinc finger and BTB domain containing 38	-0.130364198533943	-0.00880189111990385	-1.75684114817542	0.083467809977424	0.999463745446798	-4.18234355115036
ZE0hHhXiXHqqen16gA	GPR156	G protein-coupled receptor 156	0.167134958828701	0.00841391544937426	1.75565866094356	0.0836712782650181	0.999463745446798	-4.1839459694066
KUrgQnSQ2hN3qgKCuk	GGA3	golgi associated, gamma adaptin ear containing, ARF binding protein 3	-0.0936197153870722	-0.0151749370884681	-1.75406257206948	0.0839465651040418	0.999463745446798	-4.18610733821989
0lQqAgCgp33VSL1U5I	IL16	interleukin 16	0.10778324841539	0.0196239253642696	1.75378851426481	0.0839939087821522	0.999463745446798	-4.1864782808784
EuCFC1IHg1wgOSh5Ag	OAS3	2'-5'-oligoadenylate synthetase 3	-0.150566545565133	-0.0917610654846841	-1.75262392825416	0.084195338331162	0.999463745446798	-4.18805399229258
31dE1blV5npfRLKw6c	UBE2J2	ubiquitin conjugating enzyme E2 J2	0.140147359308254	-0.00160598099616302	1.75169002427811	0.0843571571751617	0.999463745446798	-4.18931690853858
KRe80SR.qKUK6ih5_I	PLIN5	perilipin 5	-0.258777864894418	-0.00415107869084286	-1.75127118111904	0.0844298142337052	0.999463745446798	-4.18988311340983
6CXeJFC1CCBCCJm6Sk	ZNF598	zinc finger protein 598	0.097058003592472	-0.0287670802376869	1.75062586714273	0.0845418586741436	0.999463745446798	-4.19075523106151
3kilwKHt9e63vp73qE	SNORA2C	small nucleolar RNA, H/ACA box 2C	-0.149981450811197	0.0721084888294581	-1.75051336522083	0.0845614047175338	0.999463745446798	-4.19090724372538
l1Ko4oIpInpI9i63cU	NFATC2IP	nuclear factor of activated T-cells 2 interacting protein	-0.100373501484572	0.0191532101673226	-1.75039766315916	0.0845815106503914	0.999463745446798	-4.19106357129361
Tml_oAoArS5LSiIStU	BEND4	BEN domain containing 4	-0.131598693703199	-0.0388975255725825	-1.75017192271263	0.0846207497021408	0.999463745446798	-4.19136854747101
QBhFJQFJJV0k1JBMJo	CD52	CD52 molecule	0.0678532167747502	0.0198352184437767	1.75013945834373	0.0846263940186193	0.999463745446798	-4.19141240405581
x7R527rdSQqPamCEBo	CXXC5	CXXC finger protein 5	-0.0781121774152041	-0.0144982918496741	-1.74953453322298	0.0847316244076368	0.999463745446798	-4.1922294728515
Q5yEnkJ4AuXkP5T8.s	MCTP1	multiple C2 and transmembrane domain containing 1	-0.168450719539422	-0.0612734010556015	-1.74922765028133	0.0847850499104286	0.999463745446798	-4.19264388109773
Kne_r7vqIJp6L093RU	CBY1	chibby family member 1, beta catenin antagonist	0.0870415540809354	0.0243705457223978	1.74875033989279	0.0848682006180308	0.999463745446798	-4.19328830156077
lroiagq351wu_ee6f8	CYB561A3	cytochrome b561 family member A3	0.092441740050644	0.0138901354145946	1.74843343690374	0.084923444503527	0.999463745446798	-4.19371606772429
QRoEUuTkoPToQgnlKQ	HNMT	histamine N-methyltransferase	0.120049246356356	0.0484309913903475	1.74830012376302	0.0849466931034403	0.999463745446798	-4.19389599746892
H55X9ekqeui31dAk5c	HMCES	5-hydroxymethylcytosine (hmC) binding, ES cell-specific	0.0723165063835926	0.0433366874565678	1.7482740008369	0.0849512493207981	0.999463745446798	-4.19393125355398
3v0R0nE7hdSfrivl4I	METTL13	methyltransferase like 13	0.0651499699138056	0.0219919614540796	1.74772607576073	0.0850468619756047	0.999463745446798	-4.19467063671789
EWvSfWEUi6BUsJFNKA	PTCD2	pentatricopeptide repeat domain 2	0.0823737532891278	0.0139630300849888	1.74763557299564	0.0850626632205996	0.999463745446798	-4.19479274332605
Hu7ld5S32d7Vb0NBVM	CRACR2B	calcium release activated channel regulator 2B	0.118710581575899	-0.0121197742867789	1.74638653960788	0.085280985004052	0.999463745446798	-4.19647736433639
fChff_BFO1QiiCmnxc	PRKDC	protein kinase, DNA-activated, catalytic polypeptide	0.104756182677724	-0.0593661024565406	1.74629151270287	0.0852976139435407	0.999463745446798	-4.19660548672508
EAFkjpF1bdI1IASUqU	CDCA2	cell division cycle associated 2	0.0854912466769479	0.0603822426528997	1.74429497825567	0.0856476113851786	0.999463745446798	-4.19929591926537
uBJ3u7grih36CSlNek	BMF	Bcl2 modifying factor	0.095320371721837	0.03890608757025	1.74343844122446	0.085798127739089	0.999463745446798	-4.20044930122833
rZZm1d_5r0US_z8LjY	TAPBP	TAP binding protein	0.0741622122690676	-0.00373019593567174	1.74323121322541	0.0858345760239163	0.999463745446798	-4.20072827070616
01S9SfXAMhLqzakktE	EPB41	erythrocyte membrane protein band 4.1	0.104079798624417	0.0227273178015659	1.74322694369271	0.0858353271048857	0.999463745446798	-4.20073401802092
i2QZ7qb1KK626YF6Sc	SERTAD3	SERTA domain containing 3	0.17405221526363	0.0255352376684267	1.74288283352528	0.0858958795926925	0.999463745446798	-4.20119719102555
WOUq4KhLpSofa5I8Ik	AP5Z1	adaptor related protein complex 5 zeta 1 subunit	0.119521055336518	0.023523509071756	1.74287750232857	0.0858968179919045	0.999463745446798	-4.20120436618263
6opS77qfXnqHiCnRgo	SQSTM1	sequestosome 1	-0.0647899898319323	-0.00769828252227773	-1.74284175380946	0.0859031106782031	0.999463745446798	-4.20125247893182
NTVXOp1SVfkV0_e9I8	PTPA	protein phosphatase 2 phosphatase activator	0.0649026793590047	-0.00137999942327758	1.74216725835974	0.0860219111306024	0.999463745446798	-4.2021600942136
NeSeol5.eUt_K94I0k	STK38	serine/threonine kinase 38	0.0645064680798891	-0.0357819269925342	1.74155765791651	0.0861293981814089	0.999463745446798	-4.20298011441768
6XwvUDv9Zwy3tcCX_U	RNF32	ring finger protein 32	0.107137805044732	0.00604668800228045	1.74151595908129	0.0861367547285935	0.999463745446798	-4.20303619730913
HqUg1UK9X._9NKV9eI	HIPK2	homeodomain interacting protein kinase 2	0.102038796598231	0.00049221496956883	1.74089646068857	0.0862461083408732	0.999463745446798	-4.20386925048681
Wknr9.ArvqAr8somsk	VPS13A	vacuolar protein sorting 13 homolog A	-0.105686180123389	0.00392712191745543	-1.74072435019377	0.0862765095576202	0.999463745446798	-4.20410064409618
NjAVAgFC3giFejirUU	FKBP3	FK506 binding protein 3	0.0811298936926503	0.00457884397514201	1.74027996196188	0.0863550462310746	0.999463745446798	-4.2046980060922
644KXkXrVdVB3nedeA	SNORD139	small nucleolar RNA, C/D box 139	0.118676139628261	0.00103970029067318	1.7392915435699	0.0865299409436102	0.999463745446798	-4.20602618173642
3UdTfQFV0X9U1x15Tk	MLF2	myeloid leukemia factor 2	0.0650525295135861	0.00740833395564554	1.73908033155335	0.0865673515371809	0.999463745446798	-4.20630990765242
K7XOTrKR6VIKeUSAR4	SNORA5A	small nucleolar RNA, H/ACA box 5A	-0.160412772133474	0.0141873997690269	-1.73902630892446	0.0865769223535829	0.999463745446798	-4.20638247251792
B_xQuiSuvmpCb7kiVM	CCNE1	cyclin E1	0.0729110423111967	0.0133874029232915	1.73869504722808	0.086635628803497	0.999463745446798	-4.20682738926032
HkqnwPR6DUV4f9eUsc	TMEM116	transmembrane protein 116	0.0751521583927648	0.0160185276073392	1.73861728219643	0.0866494151427669	0.999463745446798	-4.20693182425814
TSFS_KIUhFOSK24IK4	MRPL21	mitochondrial ribosomal protein L21	0.0560529040041837	0.0118497741437976	1.73775673901195	0.0868020948712577	0.999463745446798	-4.20808721596094
oRj7p_O6QlgFH6d6A0	ST3GAL6	ST3 beta-galactoside alpha-2,3-sialyltransferase 6	-0.0767101350993464	-0.0476537879671993	-1.73775061337537	0.0868031824923968	0.999463745446798	-4.2080954385894
QXfHYVLf7Ag6ikntII	THAP1	THAP domain containing 1	-0.0999279879904261	0.0275073772738568	-1.73773039626614	0.0868067721673661	0.999463745446798	-4.20812257644608
6l.js.1XQjzQe7vYS4	CLIP1	CAP-Gly domain containing linker protein 1	-0.0676935596235665	-0.0529155308317343	-1.73725112688142	0.0868919053456619	0.999463745446798	-4.20876582701281
WnurCgttU.zo7oB4p4	KRI1	KRI1 homolog	0.0783400658035628	-0.0524081224461635	1.73628959067871	0.0870629119191513	0.999463745446798	-4.21005587108637
BgnCcruCDoPoJUeX1Q	AASDHPPT	aminoadipate-semialdehyde dehydrogenase-phosphopantetheinyl transferase	-0.0662037308667055	0.034753177884327	-1.73606010894904	0.0871037656330384	0.999463745446798	-4.21036366029812
TCf0gztLnjsk5__Q_U	RECK	reversion inducing cysteine rich protein with kazal motifs	-0.120265512111717	-0.0282066217033835	-1.73596911911366	0.0871199685676081	0.999463745446798	-4.21048568905646
o0GIwm6C6HaNVmSXH0	CAD	carbamoyl-phosphate synthetase 2, aspartate transcarbamylase, and dihydroorotase	0.0892272210829832	0.0514117420745689	1.73593592058484	0.0871258809854414	0.999463745446798	-4.21053021101008
cXyv45oN5YuOmnVSo4	REX1BD	required for excision 1-B domain containing	0.0780580057275318	-0.00623461366791567	1.73589223574208	0.0871336614443352	0.999463745446798	-4.21058879480782
BAZH7.TkomqQsK_JeE	RFC5	replication factor C subunit 5	0.0664729367607471	-0.00558960480187576	1.73575649682256	0.0871578407892259	0.999463745446798	-4.21077081978833
TSe7p4f0P8Ibg_ExJU	ZBTB11	zinc finger and BTB domain containing 11	-0.102452034801444	-0.0246092378210958	-1.73513356296057	0.0872688757873408	0.999463745446798	-4.21160600610803
0IKDp61Ip.7UdXdHoI	ZNF589	zinc finger protein 589	0.0825823964737419	-0.00499215348377342	1.73404118876828	0.0874638680061067	0.999463745446798	-4.21306993577049
Zd0QegRHPTqlg5bpY4	RBM19	RNA binding motif protein 19	0.165345983499414	-0.00765857525589969	1.73390422026431	0.08748834264734	0.999463745446798	-4.21325343377705
ZXfuqureKgtJzAE.no	SART3	squamous cell carcinoma antigen recognized by T-cells 3	-0.101603626414977	0.0153344237809996	-1.73347386963071	0.0875652779393127	0.999463745446798	-4.21382989395864
H3SOCK9hKh0CXPUvpc	GLRX3	glutaredoxin 3	-0.0786317672209721	0.0100804171234065	-1.73323292628141	0.0876083765851506	0.999463745446798	-4.21415258457474
Ht1UXcUk3nic4lAUqM	AIF1	allograft inflammatory factor 1	0.155174818351723	0.0209858590935393	1.73214290562617	0.0878035722294466	0.999463745446798	-4.21561192436416
ZirTd9z7F5JGfXqe8Q	ALG13	ALG13, UDP-N-acetylglucosaminyltransferase subunit	-0.0878108640343627	0.0324398688727609	-1.7320026604725	0.0878287126718932	0.999463745446798	-4.21579962732755
i0I6N3dlGkW0nX_6UI	FBLN1	fibulin 1	-0.0978365680353534	-0.0260238330134953	-1.7315978139865	0.0879013190267992	0.999463745446798	-4.21634139400142
f5l.I4RhXFRV79SaOU	PSMB8	proteasome subunit beta 8	0.120478698808395	0.0174698769536372	1.73152554353037	0.0879142854259631	0.999463745446798	-4.21643809456294
3lOb7J463W7CUClRIo	NUDT9	nudix hydrolase 9	0.063267339791418	-0.00509590222229758	1.73117535750159	0.0879771363628872	0.999463745446798	-4.2169066051926
9nrntSEoL135x3olPI	SERPINI1	serpin family I member 1	0.0951991523283747	0.00809041111855055	1.73056991902828	0.0880858870578612	0.999463745446798	-4.21771641498415
xpEPRgkiggMqFkkqFk	ZRSR2	zinc finger CCCH-type, RNA binding motif and serine/arginine rich 2	-0.0976636445234923	0.0107810570779337	-1.73029246997783	0.0881357603097531	0.999463745446798	-4.21808743452751
x9HjuddOlCXaXUeRec	ARHGEF39	Rho guanine nucleotide exchange factor 39	0.133910769315303	-0.0171927076687525	1.73020542164458	0.0881514126036055	0.999463745446798	-4.21820382915397
3KkJ6KWWVK4pKYcNI8	NPEPPS	aminopeptidase puromycin sensitive	-0.148321236989299	-0.0150307826823558	-1.73003331588647	0.0881823659461003	0.999463745446798	-4.21843394083551
KokaNxRFPkz_EVfVSU	MGST1	microsomal glutathione S-transferase 1	0.0664036631640601	-0.00879892195697099	1.73001041695975	0.0881864850094577	0.999463745446798	-4.21846455598714
3J6JkCk4kIph5CJ6eA	CXorf56	chromosome X open reading frame 56	0.0881966600457564	-0.00739308146798734	1.72933746102548	0.0883076072801502	0.999463745446798	-4.21936411461882
EClUiJwdFfUUzihukI	FCRLA	Fc receptor like A	0.0650299842560741	-0.0408419939065996	1.72926275473697	0.0883210617750321	0.999463745446798	-4.21946395717918
fp09Hj2kn5CCud4Lik	GEMIN2	gem nuclear organelle associated protein 2	0.0637854900642734	-0.012656655060863	1.72866067895419	0.0884295564364226	0.999463745446798	-4.22026847076046
cyYSYSaIYqY4MYYT7o	NFKBIB	NFKB inhibitor beta	0.0889563073755326	-0.0243144086352884	1.7280281114104	0.0885436640250568	0.999463745446798	-4.22111345738883
TlKmqmq5P1NfsBX0yw	JDP2	Jun dimerization protein 2	0.12084761164313	-0.0714472785775298	1.72796848101732	0.0885544268862229	0.999463745446798	-4.22119309761517
BqwYWft.rdwVw3ep_U	GPATCH3	G-patch domain containing 3	0.105023618114265	-0.00151056157343612	1.72764538224701	0.088612762657338	0.999463745446798	-4.22162457388633
oxei.DEuJ3JCopnl.4	MAPK1	mitogen-activated protein kinase 1	0.0613135749674739	-0.017027352205338	1.72758189030686	0.0886242299050669	0.999463745446798	-4.22170935450217
6vkCuir.Id059K57ao	FBXO42	F-box protein 42	-0.122468914136016	-0.0322747313302833	-1.72753236810752	0.0886331749335134	0.999463745446798	-4.22177547941814
KQ7qAFxbZe6HdHgTSA	ZNF334	zinc finger protein 334	0.11669495139522	-0.0238761791062652	1.72753209995956	0.0886332233702033	0.999463745446798	-4.22177583746022
BTTooXoRA5IQknifYo	S100A9	S100 calcium binding protein A9	0.144580116253594	-0.0173555419979948	1.72701545448051	0.0887265877139839	0.999463745446798	-4.2224655908636
3t7554CO3u5ezQTuH0	DENR	density regulated re-initiation and release factor	0.0565821408240547	0.0243799919655583	1.72661438058858	0.0887991226635309	0.999463745446798	-4.2230009213279
xUyEP5SjcoFFw6yuhI	PUS3	pseudouridylate synthase 3	-0.0803555539722293	-0.00092422146634839	-1.72630942262019	0.0888543075556405	0.999463745446798	-4.22340788700793
xlLNEzp6SaEQqs36x4	CASD1	CAS1 domain containing 1	-0.0826835442439937	-0.0400147127776284	-1.72622752342864	0.0888691327632068	0.999463745446798	-4.22351717028269
3QNFN.aeL246P5..eM	SNORD51	small nucleolar RNA, C/D box 51	-0.130860677087706	-0.0254989160599878	-1.72611524992857	0.0888894595707356	0.999463745446798	-4.22366697635022
lqVdOyUAhQgA3pUSMI	GOLGA4	golgin A4	0.0915244979283004	-0.0304668130279337	1.72582662152428	0.0889417325240373	0.999463745446798	-4.22405205185997
cSJ3ogDrvuu.3eq0uM	UGT2B11	UDP glucuronosyltransferase family 2 member B11	-0.0990351230429253	0.00367361304023907	-1.72567929538149	0.0889684242459475	0.999463745446798	-4.22424858571323
TWX7nLldiCLz53IC_I	TRAF6	TNF receptor associated factor 6	-0.103379362835312	0.00829444178189876	-1.72564635908384	0.0889743923613208	0.999463745446798	-4.22429252084672
TTZOhZKKkj2hRyl4Dg	COL4A1	collagen type IV alpha 1 chain	0.155168851425567	-0.0661996476420626	1.7254675773125	0.0890067936871102	0.999463745446798	-4.22453099233956
Wqoa1KBQxVOjFCoQew	ZNF770	zinc finger protein 770	-0.0550581108639152	0.0104156586375755	-1.72544424998926	0.0890110221065424	0.999463745446798	-4.22456210629961
ZqSpvyx7dV.FJAXh9E	CMC2	C-X9-C motif containing 2	-0.0565001153932068	0.00404833626913988	-1.7253876418751	0.0890212838452366	0.999463745446798	-4.22463760857342
oewoDku75Lpf91V0X0	OPA3	OPA3, outer mitochondrial membrane lipid metabolism regulator	0.11248447108255	-0.0220078447694652	1.72475215603131	0.0891365495702982	0.999463745446798	-4.22548504856559
NXq3SVZsaX9GLfQl9I	TMSB15B	thymosin beta 15B	0.0868080464678763	0.00390969333682184	1.72472540104357	0.0891414051396474	0.999463745446798	-4.22552072101423
Ki6KKelAiHup7.S0qI	STIM2	stromal interaction molecule 2	-0.111644544191326	-0.0128819525095332	-1.72463562554563	0.089157699437498	0.999463745446798	-4.225640415131
fgQ1ax7FM0tf7qyysk	SPG11	SPG11, spatacsin vesicle trafficking associated	0.0648825061833904	-0.00822498545716973	1.72450744383193	0.08918096873357	0.999463745446798	-4.22581130503112
HbAOqtXx5PNCoCkIeo	RPL7A	ribosomal protein L7a	0.0608670146443034	0.0106477771607739	1.72422223294095	0.089232762054154	0.999463745446798	-4.22619150287685
3REwfFXXzB9wEK9dUs	NA	NA	0.085551512727868	-0.00283361445962731	1.72242001820807	0.0895606110601904	0.999463745446798	-4.22859262239226
uuBPB.VSdpd7ahS5Ss	WFDC2	WAP four-disulfide core domain 2	-0.134609620220513	0.0372759536073527	-1.72216137901192	0.0896077425383677	0.999463745446798	-4.22893702634498
Qllyy9XtECo5Qp8WN4	FYN	FYN proto-oncogene, Src family tyrosine kinase	0.21995187415037	-0.0667349440012593	1.72158468955982	0.0897129054041145	0.999463745446798	-4.22970477862543
oXT1TnyVFSJwVe331U	ZWINT	ZW10 interacting kinetochore protein	-0.168147568844638	0.0458830709595976	-1.72134258771325	0.0897570844259046	0.999463745446798	-4.23002702228338
o9S.Ipo.rbobrSUXSw	RPS10	ribosomal protein S10	0.0596899696972538	0.00133467859700359	1.72114943678117	0.0897923436679467	0.999463745446798	-4.23028408182415
TXh9RjAOiOLkquLsy8	NUDT4	nudix hydrolase 4	0.137512427769856	0.00943324620587766	1.72103550812381	0.0898131464167149	0.999463745446798	-4.23043569434576
i4XUJ15dFt5fnXd9UA	GCHFR	GTP cyclohydrolase I feedback regulator	0.0832341152144365	0.0154328697163519	1.72077429174241	0.089860858069116	0.999463745446798	-4.23078327848296
WnreoAXlc0OLO_W68U	EID1	EP300 interacting inhibitor of differentiation 1	0.0803609774214984	-0.0142387079854404	1.72073688795906	0.0898676916457283	0.999463745446798	-4.23083304545249
0leJ4Hq_7wRPrInOPU	EPB41L5	erythrocyte membrane protein band 4.1 like 5	-0.13692695898335	0.0184034051594946	-1.72024992992035	0.0899566966779791	0.999463745446798	-4.23148087046015
Kf_KjDeX7Py0ipyK5I	PGBD2	piggyBac transposable element derived 2	-0.0999721533992567	-0.0116438519332395	-1.72022722592877	0.0899608482286718	0.999463745446798	-4.23151107071102
uF7uCSSUl8Cy1PfnDo	ATP6V1G1	ATPase H+ transporting V1 subunit G1	-0.0546701790814184	-0.0190428734537483	-1.72008592352837	0.0899866896996602	0.999463745446798	-4.23169901938212
lEo1VIhVP5d0EdIX0E	SF3A3	splicing factor 3a subunit 3	0.058388119107033	0.0404413395429595	1.7199491691898	0.090011705233948	0.999463745446798	-4.23188090538253
xn18p4i5VSnhN7vp.4	ZC4H2	zinc finger C4H2-type containing	0.111612976270323	-0.0202778434581681	1.71920445458116	0.0901480312119771	0.999463745446798	-4.23287116247832
x6gOLnSojonyqK6ufU	PSMB9	proteasome subunit beta 9	-0.107569671418667	-0.0827566742983364	-1.71916383572071	0.0901554717022914	0.999463745446798	-4.23292516283702
ZjxeiXolH8L7H3hwHo	ABCE1	ATP binding cassette subfamily E member 1	-0.051014010101092	0.0227815461363015	-1.71915018357627	0.0901579725911627	0.999463745446798	-4.23294331229333
QRw5Snhu36LunIQLpI	PAK1IP1	PAK1 interacting protein 1	-0.0689235003337939	-0.00573653365214531	-1.7189655276239	0.0901918046799131	0.999463745446798	-4.23318878518188
9eHhRVdIkSNKhdGTd8	TUBG1	tubulin gamma 1	0.0770124305007937	-0.0186406489916749	1.71892647000299	0.0901989620336234	0.999463745446798	-4.23324070349769
rjoMglfvnsjubkt6SU	PTP4A2	protein tyrosine phosphatase type IVA, member 2	-0.0547663769636884	-0.000842858717314545	-1.71872372437787	0.0902361229096453	0.999463745446798	-4.23351019112656
fSga6TpuqgH6L6CunA	STAG3L2	stromal antigen 3-like 2 (pseudogene)	-0.141011484818376	0.0121131972919737	-1.71867322344452	0.0902453810925824	0.999463745446798	-4.23357731205811
l7rgikgWK2olT47eJc	LAMTOR4	late endosomal/lysosomal adaptor, MAPK and MTOR activator 4	0.072642963531326	-0.00777838491681033	1.71843448322408	0.0902891591920139	0.999463745446798	-4.23389459834159
o57uHOPXCP1KnwqcH0	MAP3K1	mitogen-activated protein kinase kinase kinase 1	-0.0681402676264661	0.00932409493867476	-1.71828192523656	0.0903171430920799	0.999463745446798	-4.23409732748896
ZtKfs43PXxRAILIQ_U	SOCS4	suppressor of cytokine signaling 4	0.135995076191293	-0.0262056989874242	1.71751256818311	0.0904583759340185	0.999463745446798	-4.23511945339833
6v0IiP70eVJ2.7teJU	SCD5	stearoyl-CoA desaturase 5	-0.175777370421862	-0.0460307342583122	-1.71709402282573	0.0905352856299902	0.999463745446798	-4.23567533707378
0JI6Y5KFJenYoJZong	RPS19BP1	ribosomal protein S19 binding protein 1	-0.0737262698062153	0.0326870770787222	-1.7170038763488	0.0905518575094585	0.999463745446798	-4.23579504758724
6JBMuKNU3cZUV1VaQA	GALNT6	polypeptide N-acetylgalactosaminyltransferase 6	0.1284118205042	-0.050818700668382	1.71656601407353	0.0906323864468561	0.999463745446798	-4.23637642880817
l86KKaV68d6KCSKc6A	HNRNPA1	heterogeneous nuclear ribonucleoprotein A1	0.0977800620633053	0.0224576829196423	1.7164663559638	0.0906507231782872	0.999463745446798	-4.23650873341231
Nnunn0fI5LiETL671g	ERRFI1	ERBB receptor feedback inhibitor 1	-0.120066952359767	0.0107488541312788	-1.7162311752982	0.0906940076635324	0.999463745446798	-4.23682092832659
rS4URJ11OXhQSlSf1c	MRPL28	mitochondrial ribosomal protein L28	0.105362334800469	7.64585757861711e-05	1.71505410653516	0.090910900031252	0.999463745446798	-4.23838287169379
3iPkKmqIop3QwMNuwU	FDPS	farnesyl diphosphate synthase	-0.08001997845155	-0.0305583998546127	-1.7147810674056	0.0909612724200108	0.999463745446798	-4.2387450506315
ZRF7qm9P.dZ1IKM4UU	AGO3	argonaute 3, RISC catalytic component	0.110277021358719	0.0115347652755719	1.71471901412685	0.0909727236921761	0.999463745446798	-4.23882735537356
ceieelhe7iBOhDlkh8	HSPBP1	HSPA (Hsp70) binding protein 1	-0.141988220553962	0.020903235643564	-1.71456640029967	0.0910008919911043	0.999463745446798	-4.23902976424796
HoBSf3rwrwRSOuVdPo	TSPAN3	tetraspanin 3	0.0558151689374357	0.015050487050901	1.71422833632362	0.0910633147988453	0.999463745446798	-4.23947807447703
uYRwCXvvVN5lpdbTg4	LIPE	lipase E, hormone sensitive type	0.149334977208774	-0.0110707147244262	1.71414734064369	0.0910782757074458	0.999463745446798	-4.23958547189727
EXhErunHoql9MXmlUA	TMEM129	transmembrane protein 129	-0.140572135495738	-0.0319348012540148	-1.71414401991689	0.0910788891300612	0.999463745446798	-4.23958987496666
TfX8Kh7N.L04VNNJ5c	BBOF1	basal body orientation factor 1	0.135716893370461	-0.049121911326492	1.71368415913465	0.0911638699040204	0.999463745446798	-4.24019954655821
BgSfotO.E3L3Hha9U0	LOC100240735	uncharacterized LOC100240735	0.0832216348603276	0.00406614712607381	1.71368068971871	0.0911645112883827	0.999463745446798	-4.24020414566117
Wegr.fudqIguKglpLU	CLUHP3	clustered mitochondria homolog pseudogene 3	-0.168661477030388	-0.0755287625023361	-1.71345545078426	0.0912061587210273	0.999463745446798	-4.24050270739779
WI7KsS6BMJLvFXp6i0	FRMD6	FERM domain containing 6	0.140587211218826	-0.0425006862987515	1.71342062560868	0.0912125994080493	0.999463745446798	-4.24054886618006
BLXpdZI59P_Ffp5LoI	WARS	tryptophanyl-tRNA synthetase	0.0826348865905717	-0.0709858436230896	1.71212959533145	0.0914516308686419	0.999463745446798	-4.24225945732711
r.kDwC6qSK6mjReK0o	RBM3	RNA binding motif protein 3	0.125956942720563	-0.0228250980962138	1.71176961534443	0.0915183720741594	0.999463745446798	-4.24273621723954
fQbX2EuV1lEh.laXTc	ARID5A	AT-rich interaction domain 5A	-0.0952094611106567	0.0510755773770572	-1.71146996523905	0.0915739584822363	0.999463745446798	-4.24313300703846
Bhnt0F1F2aaBWKEol0	BTF3	basic transcription factor 3	0.0727008479661628	0.0119045906345797	1.71127707966177	0.0916097542744084	0.999463745446798	-4.243388388621
Z_OQlcBHf2HUiiCekk	TXLNGY	taxilin gamma pseudogene, Y-linked	0.124862823743885	-0.0313908099867455	1.71069092967366	0.091718602802629	0.999463745446798	-4.24416429549042
0UJD25LqOJx.lJyKWU	DCTN3	dynactin subunit 3	0.0580479710791275	0.0118789389882906	1.71060841012134	0.0917339352782668	0.999463745446798	-4.24427351024262
fF5976WihjleBd_iX8	C17orf97	chromosome 17 open reading frame 97	0.129773243370634	-0.016239750858047	1.71041625449269	0.0917696467522404	0.999463745446798	-4.2445278101284
f5ISLpTs7k5MxHcS54	PSMA3	proteasome subunit alpha 3	-0.068640126491429	-0.0248238744657661	-1.71019216676354	0.0918113071222216	0.999463745446798	-4.24482433666203
QREIBTd43l7nBUngQ4	ST7L	suppression of tumorigenicity 7 like	-0.112233928932143	-0.018914505601438	-1.71009051579297	0.091830210275111	0.999463745446798	-4.24495883588757
WpeSSi65ISC3XQ._3Q	RASSF1	Ras association domain family member 1	0.102042231541011	0.0447999798677604	1.70999573508582	0.0918478387043622	0.999463745446798	-4.24508423825768
WdflJVFVK._VNdUN0M	CTSW	cathepsin W	-0.176868664726212	0.0625705112489978	-1.70943944747456	0.091951359648238	0.999463745446798	-4.24582012461892
xinjtCRRFUFUm3bi1g	PDGFRL	platelet derived growth factor receptor like	-0.14808794210732	0.00321054501226658	-1.70906308568431	0.0920214520815511	0.999463745446798	-4.2463178734352
HUruR6C4rROJJuoIIc	XYLT2	xylosyltransferase 2	-0.0607533184194856	-0.00115891513834727	-1.7088280473513	0.0920652471328327	0.999463745446798	-4.24662866803994
NcIKgflNCPXsUpUaW0	SIN3B	SIN3 transcription regulator family member B	0.0874657431473239	-0.0238670880053421	1.70785706519582	0.092246353166918	0.999463745446798	-4.24791220393788
KyiOkWAmCgnXnXXAlg	RPL23AP7	ribosomal protein L23a pseudogene 7	-0.0762362134715431	-0.00107913095796651	-1.70756149904748	0.0923015397278502	0.999463745446798	-4.24830278076644
fowE6Ybd5OKhUYFJ6M	ELF2	E74 like ETS transcription factor 2	-0.120560315811211	-0.0210941360752746	-1.70728118998178	0.0923539026070248	0.999463745446798	-4.24867313983288
TGtKt9_YVpWdSNVEnc	UNC93B1	unc-93 homolog B1, TLR signaling regulator	-0.0621174044063059	0.0639036990565362	-1.70726200510232	0.0923574873124286	0.999463745446798	-4.24869848590173
lT2M6FFF0neaF.6l2k	MIA3	MIA family member 3, ER export factor	0.102516595364592	0.0516174803846165	1.70665701740592	0.0924705882107527	0.999463745446798	-4.24949763272624
xycXf70.CRSwI07f.A	NNT	nicotinamide nucleotide transhydrogenase	0.149925507792214	0.0182687432016417	1.70655814423923	0.0924890831002698	0.999463745446798	-4.24962821307777
TN9VNamUSCRtF9xShc	THOC6	THO complex 6	0.0817429252627752	0.0079557730865618	1.70564003846376	0.0926609659959693	0.999463745446798	-4.25084041662067
WiYU99fJKFcke0SF6I	SNORD14D	small nucleolar RNA, C/D box 14D	0.129348997655816	-0.0809385035568903	1.70458095287789	0.0928595679381367	0.999463745446798	-4.25223803033934
EfRM3kFIklFCTx8kko	WDR82	WD repeat domain 82	-0.1029446587605	-0.0267352735163955	-1.70438229869058	0.092896858862731	0.999463745446798	-4.25250009563381
NhY5VWKqd1UnwH__.A	PER3	period circadian regulator 3	-0.137117708883467	-0.0257284105694162	-1.7043701083266	0.0928991476110025	0.999463745446798	-4.25251617630833
o_6dVarNGX.HlGiDlc	BMP2	bone morphogenetic protein 2	-0.144639696633361	0.022418804120122	-1.70436890607011	0.0928993733378988	0.999463745446798	-4.2525177622353
NGeemdOpXrv5Fkf7DQ	GAK	cyclin G associated kinase	-0.0593562058358278	-0.00865032640601053	-1.70316214947101	0.0931261721832923	0.999463745446798	-4.25410911718376
E_iCdZElpVci30gEig	RRBP1	ribosome binding protein 1	-0.0997207583654472	-0.0218108167547588	-1.70283324910844	0.0931880647049039	0.999463745446798	-4.25454266335305
f8B5oO6XefXW115UKE	BAZ1B	bromodomain adjacent to zinc finger domain 1B	0.0611309763391241	0.00201981673394112	1.70244201163174	0.0932617317735038	0.999463745446798	-4.25505828210763
QhHlwIysgynsn4.Hug	ING3	inhibitor of growth family member 3	-0.167995325341403	0.0165355540176898	-1.70239981882709	0.0932696792134974	0.999463745446798	-4.25511388236984
KRFX.U.CFece7giOMc	KCNMB2	potassium calcium-activated channel subfamily M regulatory beta subunit 2	0.147203257525449	-0.018700999936573	1.70223724977571	0.0933003059267674	0.999463745446798	-4.25532809880183
liiOaCdSlGuSidSCZ8	LOC606724	coronin 1A pseudogene	0.0627359141848661	0.0170620755876268	1.7018074550696	0.0933813155574925	0.999463745446798	-4.25589434836086
cmVBdX09CRP8alxKgo	LINC00294	long intergenic non-protein coding RNA 294	0.0683174467390523	-0.0130142612123009	1.70137624312315	0.0934626502829679	0.999463745446798	-4.25646233562449
WF9nJzuPpeqefdekec	SMPD2	sphingomyelin phosphodiesterase 2	-0.116135702206024	-0.0495787176823768	-1.70071456570212	0.0935875681210942	0.999463745446798	-4.25733363703991
xO1_IgFCz_JUnl6OX0	GSTM2	glutathione S-transferase mu 2	0.104666284499165	-0.0622639863999627	1.70061529765303	0.093606320705257	0.999463745446798	-4.25746432754493
lRZJJCgJ0YFUBekLRc	PRDM2	PR/SET domain 2	-0.140145752643674	-0.00923131358370274	-1.70024371417332	0.0936765433606869	0.999463745446798	-4.25795347157539
TrU1SkesflV_97NVf4	PBXIP1	PBX homeobox interacting protein 1	-0.1257538499033	0.0150326578385903	-1.6988040950345	0.0939490136908796	0.999463745446798	-4.2598476436869
KXlOxSLUOKdYL0FPS0	HTR2B	5-hydroxytryptamine receptor 2B	0.109109250539772	0.0255416133681494	1.69868652489306	0.0939712943358547	0.999463745446798	-4.26000227216376
3enAQXhAe6UqgWEQV0	TBC1D8	TBC1 domain family member 8	-0.135225650568965	-0.0890494446185078	-1.69842406258177	0.0940210490346015	0.999463745446798	-4.26034742829322
opCY0JJhzkQYij.ink	POU5F1B	POU class 5 homeobox 1B	0.115368668460699	-0.093305787689587	1.6982157624793	0.0940605516290319	0.999463745446798	-4.2606213231422
flAg_ssqogSIonqc6g	S100A14	S100 calcium binding protein A14	-0.141540315507302	-0.00585355469171579	-1.69741697634883	0.0942121617183545	0.999463745446798	-4.26167137026226
cSlaeg5_T.fl4.V6iQ	ZNF490	zinc finger protein 490	0.0904251491504189	0.027827254733817	1.69732657001343	0.0942293335045395	0.999463745446798	-4.2617901861697
Wf_S0NV51zX6VekBHo	METTL4	methyltransferase like 4	0.0691727536369498	-0.00569790160232047	1.69729955978826	0.0942344643263724	0.999463745446798	-4.26182568306622
rpStFf57intexPuo70	CASP9	caspase 9	0.0863797180902636	-0.0111132232582163	1.69713540470176	0.0942656519045633	0.999463745446798	-4.26204140508293
WSemIeyVXVHVEdHfkg	CENPM	centromere protein M	0.0609932750305362	0.0235694568767646	1.69690646766877	0.0943091614316032	0.999463745446798	-4.26234222793678
3S3ZjB5kpmhQJjd94o	RPS15	ribosomal protein S15	0.0854763577721298	0.024669060574315	1.69657667984502	0.0943718665976816	0.999463745446798	-4.26277550422627
T4CiS6Vm4_6T8KJLpU	TPK1	thiamin pyrophosphokinase 1	0.0692758392481417	0.00082750521929818	1.69564903491415	0.0945484302827114	0.999463745446798	-4.26399383984496
KlSpZXJB9exM4ewDrA	RAI1	retinoic acid induced 1	-0.0669506784224497	-0.00706619777402027	-1.6953305190546	0.094609117514792	0.999463745446798	-4.26441202857582
TigfSilCiC8lJciIgk	IFT81	intraflagellar transport 81	-0.146496186885334	-0.00478576541945098	-1.69480575012519	0.0947091720033558	0.999463745446798	-4.26510085842875
orn7qnqLkhPrv3njtU	MZB1	marginal zone B and B1 cell specific protein	-0.106884186807458	-0.0421531076905715	-1.69457569527193	0.0947530624788515	0.999463745446798	-4.26540277574686
6eK7Ey19WlM8FESXiU	DNM2	dynamin 2	0.0936648792535932	-0.022193727040427	1.6942731946722	0.0948107997020016	0.999463745446798	-4.26579971249989
3WSCIjnneleong9QlQ	STRADA	STE20-related kinase adaptor alpha	0.109334314975871	-0.0274005988639545	1.69404440809632	0.0948544865260603	0.999463745446798	-4.26609988036318
rV0XE9TLqVuqdeuTfA	TSPAN4	tetraspanin 4	0.0743349654183252	-0.056535294673163	1.69401225594045	0.0948606273052128	0.999463745446798	-4.26614206104397
6PUmKK6yqpc6B6cfoQ	DHX9	DExH-box helicase 9	0.111163739427587	0.00646282053213752	1.69400169066269	0.0948626452514719	0.999463745446798	-4.26615592156212
cKgKgtuiKSoA68JJWk	CCNY	cyclin Y	0.0776350084859269	0.0109057426592778	1.69391847047113	0.0948785413656212	0.999463745446798	-4.26626509485608
Trc1Y6p.17JeRNvoBk	SNORA18	small nucleolar RNA, H/ACA box 18	-0.0808327602109199	0.0107215243148759	-1.69381747137926	0.0948978364061989	0.999463745446798	-4.26639758509093
0U6lHv0kF0lLkEQXSU	CASC15	cancer susceptibility 15 (non-protein coding)	-0.230870364111975	0.0824314538977557	-1.6933818569703	0.094981093759919	0.999463745446798	-4.26696894081056
fVIPviqo0L5IOMSMsQ	ZNF146	zinc finger protein 146	0.134187409063132	-0.020513463509218	1.6933558752443	0.0949860614398864	0.999463745446798	-4.26700301448343
r4o5Dl3jal4Bfr_U4I	ARID4A	AT-rich interaction domain 4A	0.117969542507229	-0.0270267584719869	1.69321288433139	0.0950134049671747	0.999463745446798	-4.26719053113652
TSilf_Qp8q7pSV4Ccc	ABHD14B	abhydrolase domain containing 14B	0.103434265964424	-0.0028652103693954	1.69312210322749	0.0950307679859961	0.999463745446798	-4.26730957302791
WoK7je6h7epe8dNec0	FAM129A	family with sequence similarity 129 member A	-0.116436809890407	0.0367211977538852	-1.6925923830973	0.0951321353946903	0.999463745446798	-4.26800408388483
QVG6keeICUfrAHjloA	SNORD35B	small nucleolar RNA, C/D box 35B	-0.105027011694596	0.0441903673858882	-1.69158684557569	0.0953247989150828	0.999463745446798	-4.26932189489878
T_bfHe90mEvl57Swno	SNORD16	small nucleolar RNA, C/D box 16	0.0814272561395483	0.0309785732138644	1.69073330805962	0.0954885894085608	0.999463745446798	-4.27043994726598
BXecb1z7TwKzRrZRek	NFKB1	nuclear factor kappa B subunit 1	-0.05200235300438	0.0101147225337132	-1.69070555503553	0.0954939189694816	0.999463745446798	-4.2704762925211
QqAk9K.J9SdLSTSLtQ	ZNF23	zinc finger protein 23	-0.0780189140144821	0.0103931391846195	-1.68966840532159	0.0956932629896508	0.999463745446798	-4.27183415383972
rSVF0c656siqMXq9wU	ZDHHC5	zinc finger DHHC-type containing 5	-0.090263493921735	0.00211264482382442	-1.68953229597317	0.0957194489730291	0.999463745446798	-4.27201229565116
rXKXUFM6WElBeucdAs	RGS22	regulator of G protein signaling 22	-0.162419163474562	0.00199050972881039	-1.68942873045662	0.0957393777996133	0.999463745446798	-4.27214783496536
N05UXZUgXgeXmjt0Z8	FAM212A	family with sequence similarity 212 member A	-0.0901989252861225	-0.048136507445577	-1.68942544967886	0.095740009166108	0.999463745446798	-4.27215212849559
NUSgsB59IlRLVedLtY	SLC25A15	solute carrier family 25 member 15	0.0704692098823338	0.0219736204999952	1.68940587070664	0.0957437770956684	0.999463745446798	-4.27217775119918
cgnoldd_gz0lwgXTKE	ZC3H4	zinc finger CCCH-type containing 4	0.0734629767685439	0.00197547142297723	1.68860210619436	0.0958985645671236	0.999463745446798	-4.27322939426395
3IISX6tmPuqfYItSS4	MRE11	MRE11 homolog, double strand break repair nuclease	-0.104565401876486	0.0225986086127474	-1.68856026476168	0.0959066279161583	0.999463745446798	-4.273284127099
fl9KnnaLRe_g6HAKFc	MXD3	MAX dimerization protein 3	0.110631962011553	0.0565460381311648	1.68837548897732	0.0959422430744206	0.999463745446798	-4.27352581791421
QV15Xe1PfIkxfTUdTk	FAM222B	family with sequence similarity 222 member B	-0.0687266775430714	-0.0233837012780896	-1.68789244017114	0.0960354008804016	0.999463745446798	-4.27415754365297
BinUhTrEgRQJYHRkdU	NIN	ninein	-0.0771047419789321	0.0248713470851112	-1.68786712390532	0.0960402852591288	0.999463745446798	-4.2741906474777
6qgAsgUkQOLpL56JME	TPP2	tripeptidyl peptidase 2	-0.111326102992188	0.0227417796727034	-1.68781671422607	0.0960500116259664	0.999463745446798	-4.27425656238818
K1Imtl1Ov6Ci7.cSjU	MIPEP	mitochondrial intermediate peptidase	0.100736106685622	0.0337753056918118	1.68777899499182	0.0960572899440506	0.999463745446798	-4.27430588230833
QrfotBVJV0CRXl0OiE	RASAL3	RAS protein activator like 3	0.0956169183712926	0.0596989249607601	1.68738656367211	0.0961330404153528	0.999463745446798	-4.27481894826232
N56p5OP.lebV93_qdc	RXRB	retinoid X receptor beta	-0.0632290985678542	0.0125620626501083	-1.68658299477199	0.0962883046906596	0.999463745446798	-4.27586920070745
3pCgkvUqItK9ScvKnk	HYAL3	hyaluronoglucosaminidase 3	0.100534065620455	0.0338640145076291	1.68638237855357	0.0963270994105391	0.999463745446798	-4.27613133262684
rtcwORde0AU5eIrVp4	RRP1B	ribosomal RNA processing 1B	-0.0823610912770499	-0.0163610813882073	-1.6862911398336	0.0963447471809762	0.999463745446798	-4.27625053890314
06lKHneI.ioBOhX.pU	PLEKHH3	pleckstrin homology, MyTH4 and FERM domain containing H3	-0.0832787678223109	-0.0632790564469529	-1.68604400458747	0.0963925623851055	0.999463745446798	-4.27657339967778
3RcB3o3S0X.tcT13Fc	DTD2	D-tyrosyl-tRNA deacylase 2 (putative)	0.105290348425796	0.0168844584108643	1.68558266756607	0.0964818728270993	0.999463745446798	-4.27717598217789
6ksdcqA6XeCzNL9N3w	TC2N	tandem C2 domains, nuclear	-0.140059395480539	-0.0648198845570064	-1.68541052578071	0.0965152151650626	0.999463745446798	-4.27740078969344
fonSKGqIyB7pHyqI4Q	EPM2A	EPM2A, laforin glucan phosphatase	0.123526404452389	0.0379010866585579	1.68528557618448	0.0965394226960207	0.999463745446798	-4.27756395387148
BSqHirn4so7iH06l6s	GPC2	glypican 2	0.114644774918209	-0.0457839926206715	1.68513054178717	0.0965694657094499	0.999463745446798	-4.27776638880052
Th97_OnxJBSx0EJJ4c	SNX14	sorting nexin 14	-0.062461283307581	-0.052359489537793	-1.68405404589783	0.0967782831033615	0.999463745446798	-4.27917155091483
0rv53XCJfTkRV4FGKA	PGRMC1	progesterone receptor membrane component 1	-0.0537166877493611	0.0197077617914793	-1.68338122276269	0.096908983911106	0.999463745446798	-4.28004938265139
fIcSejJ5X8JfojqijU	WDR75	WD repeat domain 75	-0.0555906689393644	0.00948512092007631	-1.68333045528399	0.0969188517166259	0.999463745446798	-4.28011560608023
94nyAqK6aOi6guIhHg	GCDH	glutaryl-CoA dehydrogenase	0.0830844635983849	-0.0399240002626918	1.68321385773557	0.096941518191928	0.999463745446798	-4.28026769444377
fKHkMiKkPxXrrEaBcg	ABCA12	ATP binding cassette subfamily A member 12	0.198916869305482	0.0777886821636669	1.68254088409881	0.0970724284581869	0.999463745446798	-4.28114532676179
Zi37qdILA97gJ6GjLY	NADK2	NAD kinase 2, mitochondrial	0.125470511191813	0.0242142699573978	1.68251406606131	0.0970776482320929	0.999463745446798	-4.28118029389112
0DRJ3qABBgH9X7oiio	FLI1	Fli-1 proto-oncogene, ETS transcription factor	-0.0864969104435891	-0.000383639707133907	-1.68234809902221	0.097109956609674	0.999463745446798	-4.28139668148448
HaYzcA1psteKIEuVVM	MICA	MHC class I polypeptide-related sequence A	0.0992914198680689	-0.0825970820092342	1.68229360982982	0.097120565797078	0.999463745446798	-4.28146772021279
6rp_u9OuiH69.GSJKc	DNAJC30	DnaJ heat shock protein family (Hsp40) member C30	0.114880799981291	0.00431354750061469	1.68192472843546	0.097192412880658	0.999463745446798	-4.281948584131
udUL4KvfVMlSFFejl0	SNUPN	snurportin 1	-0.0574689565915412	0.0220255389956354	-1.68178607893366	0.0972194288940885	0.999463745446798	-4.28212929928124
urk.B5.fTU4YT1RTqo	S100PBP	S100P binding protein	0.0489314503019192	-0.0310996297874732	1.680760975296	0.0974193619868217	0.999463745446798	-4.28346499723256
iX1F56pFPfLMSK6XxE	EPHX2	epoxide hydrolase 2	0.0738100421136686	-0.0159344701619301	1.68057791523961	0.0974551007938023	0.999463745446798	-4.28370344489825
iq7yfiOvArr_qKh9vs	YWHAE	tyrosine 3-monooxygenase/tryptophan 5-monooxygenase activation protein epsilon	0.116370985295884	0.00557981959690555	1.67911972096589	0.0977401666893611	0.999463745446798	-4.28560200006482
3jfUJUTUpSUKzTklXI	FIG4	FIG4 phosphoinositide 5-phosphatase	0.0670287201700883	0.0120298390028893	1.67911055241147	0.0977419612246072	0.999463745446798	-4.2856139327248
HVJpXf17e7A_9bglmc	CELSR3	cadherin EGF LAG seven-pass G-type receptor 3	-0.122812190800164	0.0496835273141929	-1.67891264745341	0.0977807031636042	0.999463745446798	-4.28587148706492
0okqkpgXf3_SFgS4Ak	ARHGAP17	Rho GTPase activating protein 17	0.0789793539917023	-0.0313295715573977	1.67884595702802	0.0977937613282968	0.999463745446798	-4.28595827208336
oO3ZwwVSc_3vu9J4jk	GPR180	G protein-coupled receptor 180	-0.078570698601089	0.00249386704085473	-1.67810555372446	0.0979388300000695	0.999463745446798	-4.28692155812893
lVSuL94mTGy_vfFVK4	DDX19A	DEAD-box helicase 19A	0.0900320555286245	0.020318049786991	1.67793114386114	0.0979730280312465	0.999463745446798	-4.28714841450379
oJOLc0jqjuuo.hOi6U	WRN	Werner syndrome RecQ like helicase	0.190082507031289	-0.00937171987277982	1.67635495033326	0.0982825282651521	0.999463745446798	-4.2891976160381
xna_3uqS3Ci9eQN3jk	TRIM69	tripartite motif containing 69	-0.0862356301158697	-0.0199663635398439	-1.6755042375531	0.0984499050318317	0.999463745446798	-4.29030290020085
BUZICdG5eSpSgKgONs	EMC8	ER membrane protein complex subunit 8	-0.0911001040781954	0.0478440820214455	-1.67441455301809	0.0986646390604022	0.999463745446798	-4.29171792618118
o4VUSopKAElIJRfhH8	DHRS3	dehydrogenase/reductase 3	-0.131189261608226	0.0155105975481417	-1.67416446913812	0.0987139746665873	0.999463745446798	-4.29204255887026
QU3eoPu6s8O.U71Qc4	SLTM	SAFB like transcription modulator	-0.061057256324543	-0.0241270866757596	-1.67415847882446	0.0987151566599734	0.999463745446798	-4.29205033433009
3tFgoAgUouyKOOKKtE	CLK1	CDC like kinase 1	-0.104674132317766	0.037683398355119	-1.67403067841301	0.0987403766626896	0.999463745446798	-4.2922162139684
x3CPeeKJVZ61d6k57k	ECHS1	enoyl-CoA hydratase, short chain 1	0.0592669504983357	0.0182551258592337	1.67351553150731	0.0988420885493593	0.999463745446798	-4.29288473720113
lN97qVfVIRaNTqRwVk	MIGA2	mitoguardin 2	-0.117673881216338	-0.0115144829386465	-1.67337369883347	0.0988701073509233	0.999463745446798	-4.29306876550255
0u_PeQia_P_j4s17r0	SCAMP1	secretory carrier membrane protein 1	-0.0988537975504491	0.0263814537866836	-1.67327564773407	0.0988894809662647	0.999463745446798	-4.29319597883962
QoQ485wnqXi.rr1KKo	NAPG	NSF attachment protein gamma	0.111329809171091	0.0567723677626853	1.67268859501736	0.0990055397126632	0.999463745446798	-4.29395749104918
iip84p7gFSJ3wZ7hQI	SNORA25	small nucleolar RNA, H/ACA box 25	-0.122399535964447	-0.0375797262284973	-1.6725481469032	0.0990333223962293	0.999463745446798	-4.29413964151047
6qRei_PSeSellS.iD4	GUSBP2	glucuronidase, beta pseudogene 2	0.0827239720420996	0.00731930417657542	1.67251259419667	0.099040356248454	0.999463745446798	-4.29418574845746
iKkl3vpeKt6Gf.Pzlw	DCAF15	DDB1 and CUL4 associated factor 15	0.082862534376256	-0.029238484587219	1.67219889731701	0.0991024366297211	0.999463745446798	-4.29459253154228
rLhAS3msHg10irEs18	TERF1	telomeric repeat binding factor 1	-0.115707609669226	-0.0316880070259931	-1.67201030340256	0.0991397745042949	0.999463745446798	-4.294837055474
Bi95SVai3iezSCis1Q	POLD1	DNA polymerase delta 1, catalytic subunit	0.092505894569512	-0.00964133203966001	1.67177244604308	0.0991868819328815	0.999463745446798	-4.29514541700689
fai.aRIc1TQlvp1.Sc	ZMYND8	zinc finger MYND-type containing 8	0.0712581001600296	-0.00216606088556896	1.67138105921025	0.0992644354727252	0.999463745446798	-4.29565272988322
r5I7oecDkp433Vf6j0	MIR1253	microRNA 1253	-0.133046694184991	-0.00307618623654202	-1.67102911348717	0.0993342159640788	0.999463745446798	-4.29610882772096
6nngsu.KNdTpLy4Owg	CCNG1	cyclin G1	-0.0830830901514973	-0.00456477207967316	-1.67059979074612	0.0994193922118089	0.999463745446798	-4.29666508329803
0lLf.0_GVSPVSUbyXE	NUBP1	nucleotide binding protein 1	0.0619176859537297	0.00808117515157312	1.67051083804838	0.0994370475878595	0.999463745446798	-4.29678031943006
Bp_tySwRS7eoI5e_QI	C8orf33	chromosome 8 open reading frame 33	0.0844256045509654	0.0649921171590453	1.67047601728397	0.0994439595270221	0.999463745446798	-4.29682542740133
Th98r4X6X4XUUcnThU	ZNF252P	zinc finger protein 252, pseudogene	0.062033280864286	-0.0189353877262646	1.67036995303085	0.0994650157489887	0.999463745446798	-4.29696282130563
rwVxJkoI2llmkp3jno	FAHD2A	fumarylacetoacetate hydrolase domain containing 2A	0.134066504077625	-0.0227674706224924	1.66996393626058	0.0995456531280201	0.999463745446798	-4.29748869588029
lXu37l6iLqOAZRIkl4	ODC1	ornithine decarboxylase 1	0.0757557168332255	0.0160063369960202	1.66977879349133	0.0995824412923836	0.999463745446798	-4.29772845515597
u7tdb09Tp6i0eOeXeU	TAGLN2	transgelin 2	0.0648428699675378	0.0243143546011974	1.66928264191126	0.0996810820725608	0.999463745446798	-4.29837085123378
K.b_LXnvrtokYqika4	BANP	BTG3 associated nuclear protein	-0.0996391171128783	-0.0301147242594049	-1.66844557068899	0.0998476822801591	0.999463745446798	-4.29945426410352
B66i6rrqz.__Ofy5KU	CCDC47	coiled-coil domain containing 47	-0.0760100725701309	-0.0309675513235415	-1.66822891941413	0.0998908388068655	0.999463745446798	-4.29973459357009
BSwYp.47vieiuLoWqk	TRAFD1	TRAF-type zinc finger domain containing 1	0.0826974697714381	-0.00062439790665279	1.66820567247989	0.0998954704557407	0.999463745446798	-4.29976467129158
c1XXqtNXUd4d4c6SSA	DHRS11	dehydrogenase/reductase 11	0.0729616796055403	0.0147558851805161	1.66813287438315	0.0999099756609664	0.999463745446798	-4.29985885763981
QolbgcYGLiIMy0gLXo	TTC9C	tetratricopeptide repeat domain 9C	-0.108449151658438	-0.00565335716209289	-1.6679720525344	0.0999420259083425	0.999463745446798	-4.30006691614074
0tNiSSXt_7iu95ajIA	GGT1	gamma-glutamyltransferase 1	0.11086573872942	-0.00997984691758264	1.66764623350383	0.100006984198164	0.999463745446798	-4.3004883792153
9KShpKriSf6iIRel.8	ZER1	zyg-11 related cell cycle regulator	-0.112594649072739	-0.0134528161216533	-1.66762557404987	0.100011104217676	0.999463745446798	-4.3005151007316
Honl6oU7QzJ7ULmKqU	IGFBPL1	insulin like growth factor binding protein like 1	0.132524081961742	-0.0233891962329109	1.66755912929521	0.100024355926395	0.999463745446798	-4.30060104020689
iAy3e6StHqoQ7Ek96U	SV2B	synaptic vesicle glycoprotein 2B	0.186114927952966	-0.0273209202361482	1.66717003076114	0.100101986278705	0.999463745446798	-4.30110423704699
3UhRFBarFEiX_SNLQs	ZBTB25	zinc finger and BTB domain containing 25	-0.143520625886224	-0.0393640327083724	-1.66670419599977	0.10019499111703	0.999463745446798	-4.30170653228308
lpbdRSAFNlB15jSfuE	ALDH3B2	aldehyde dehydrogenase 3 family member B2	0.190576126629259	-0.00580982228448573	1.66624920310206	0.100285899330538	0.999463745446798	-4.30229466261046
l11UXKUbuJ517d7fPk	TUBB3	tubulin beta 3 class III	-0.155695313949428	-0.131445795658098	-1.66624164922388	0.100287409172968	0.999463745446798	-4.30230442563499
WuXQtT9_o2dv65Hduo	LPP	LIM domain containing preferred translocation partner in lipoma	-0.130654189646319	-0.0169398911080594	-1.66602075651411	0.100331568617678	0.999463745446798	-4.30258990113311
Kngj91PXrniDApBSyU	PHLDB2	pleckstrin homology like domain family B member 2	0.165591341137123	-0.0280555734255922	1.6660166081631	0.100332398080797	0.999463745446798	-4.30259526201706
HgL7q0nhSsij0IdDug	PAWR	pro-apoptotic WT1 regulator	-0.090700750762187	0.00749070114932164	-1.66542185275507	0.100451377318612	0.999463745446798	-4.30336373507651
97oORAPuyueDnsKL8o	ITM2A	integral membrane protein 2A	-0.137414496828228	-0.0115850037989175	-1.66532888474476	0.100469985707494	0.999463745446798	-4.30348383497065
rV99EXHR.EH_dcHur4	MLLT11	MLLT11, transcription factor 7 cofactor	-0.0700728263043806	-0.0520901170684372	-1.66505038047073	0.10052574767019	0.999463745446798	-4.30384358190858
KkCW8s3nZNUfxNIvSE	ZNF195	zinc finger protein 195	0.0898564414860099	-0.0164144343102711	1.66488173249956	0.100559526524439	0.999463745446798	-4.30406139981301
WVigLdLUBF0O1AyaXY	CACNB1	calcium voltage-gated channel auxiliary subunit beta 1	0.172039297915241	-0.0312635995227345	1.66426811585928	0.100682507125496	0.999463745446798	-4.3048537500899
iZauVnkv36hMomQIJw	CEBPD	CCAAT/enhancer binding protein delta	-0.0921902460783671	-0.0133960736440266	-1.66406300932803	0.100723641739375	0.999463745446798	-4.30511854087958
ch1ejw57sVupCuVg90	C9orf72	chromosome 9 open reading frame 72	-0.10922022344302	-0.0405842029513112	-1.66382480607543	0.1007714311625	0.999463745446798	-4.30542602217351
BlCnegODaBSKjUEOKU	CTR9	CTR9 homolog, Paf1/RNA polymerase II complex component	0.0730939239682711	0.0174727460222459	1.66376610102174	0.100783211674612	0.999463745446798	-4.30550179463944
c9Pl_7XedaiH2uPeUc	ZNF519	zinc finger protein 519	0.0796567953190045	0.0308831967428027	1.6634366557904	0.100849343211618	0.999463745446798	-4.30592697509153
uZ39y5CAeSno0svQSc	JAZF1	JAZF zinc finger 1	-0.124902812783874	-0.00866911241143883	-1.66309855272641	0.100917249434525	0.999463745446798	-4.30636325003537
iJL14aJ4Uh.1ILlobY	SRP14	signal recognition particle 14	0.0533223514225198	0.0243204927365889	1.66306171506853	0.100924650333761	0.999463745446798	-4.30641077905453
isVFaz1wDXACMRfksk	MOSPD2	motile sperm domain containing 2	-0.0964581277322426	0.00427890206228843	-1.66298429401512	0.100940206113492	0.999463745446798	-4.30651066684566
ZrSXru1JbVBS5wCV7s	SPATA31D1	SPATA31 subfamily D member 1	-0.220455125152931	-0.0118348189509271	-1.66278931081054	0.100979391651628	0.999463745446798	-4.3067622133752
c_VPae6MiCSgiR6H6I	YWHAB	tyrosine 3-monooxygenase/tryptophan 5-monooxygenase activation protein beta	-0.0914365417639269	0.075355550607148	-1.6621751537964	0.101102899017307	0.999463745446798	-4.30755435868634
BlcG0.J__3jl1LKEXU	LMO3	LIM domain only 3	0.0929150110994779	-0.00435853226321579	1.66190960396895	0.101156339336565	0.999463745446798	-4.30789678521344
NkX0P5TbhkhezA8rwI	CXorf40B	chromosome X open reading frame 40B	-0.0741635400642072	-0.0169755182694422	-1.661183953845	0.10130248941151	0.999463745446798	-4.30883225843415
WV75H6een1XTXe94L8	ZNF230	zinc finger protein 230	-0.110832598542133	-0.0598090616884117	-1.66110752935405	0.101317891741749	0.999463745446798	-4.30893075967452
WeV_fBDlpQemF0a_R8	SLC25A25	solute carrier family 25 member 25	-0.069837811049092	-0.024311703677086	-1.66071184911726	0.101397666274608	0.999463745446798	-4.30944067446258
HG66K26IImImtIXVF8	NCF1B	neutrophil cytosolic factor 1B pseudogene	0.104406677014021	0.000828429883904181	1.66002593280629	0.101536077510132	0.999463745446798	-4.31032435702117
K0L4R51G55EL1r1CXk	TBXAS1	thromboxane A synthase 1	0.0945164847042272	-0.043359686349612	1.6594020867154	0.101662097092546	0.999463745446798	-4.31112778587986
fX87ba60dKt9c3gxLk	KLHL28	kelch like family member 28	-0.108261319276058	0.0218273651412169	-1.65912178815238	0.101718760036922	0.999463745446798	-4.31148868321304
iXs7STZTZnQNfZfTXs	SLCO3A1	solute carrier organic anion transporter family member 3A1	-0.165251438329354	-0.0356195705853128	-1.65911739756046	0.101719647808743	0.999463745446798	-4.31149433586341
fjhRTne7SUoYKiE3q4	TGFBRAP1	transforming growth factor beta receptor associated protein 1	-0.153905655078706	-0.00785558217034659	-1.65885238227454	0.101773245224383	0.999463745446798	-4.31183550366102
Wd2fnd3RTuER6dV9F8	COX15	COX15, cytochrome c oxidase assembly homolog	0.109743309398358	0.0103879862992958	1.65836033446486	0.101872819268868	0.999463745446798	-4.31246881115992
cXUUeXXUV33ojLD3T8	NAF1	nuclear assembly factor 1 ribonucleoprotein	0.0754465228873916	-0.0169062976047649	1.65799343597636	0.101947118855338	0.999463745446798	-4.31294093002961
Nnf_8yrOjT7SB_Poqs	AFTPH	aftiphilin	-0.087273968507081	-0.0327981312101107	-1.65780464892151	0.101985366771767	0.999463745446798	-4.31318382119193
HhXkL490_Uj1PFf310	USP6	ubiquitin specific peptidase 6	0.132003574755301	-0.0150263871554026	1.65726532038718	0.102094698086333	0.999463745446798	-4.31387757676562
0VTO3tX6Mq4p4JFKiA	VPS25	vacuolar protein sorting 25 homolog	0.0567581191959171	0.0209080374988504	1.6571058279931	0.102127048244031	0.999463745446798	-4.31408269775654
HCOEKKtF67lo2mPp1A	CLK3	CDC like kinase 3	0.111838266457969	-0.0177200373727622	1.65686693772023	0.102175518430366	0.999463745446798	-4.31438989781411
x6WHZi4oAgoCpIetmA	WAC	WW domain containing adaptor with coiled-coil	0.155269224567743	0.0178455899657063	1.65496256743273	0.102562579558294	0.999463745446798	-4.31683738043737
Td4gleJxfqt6rq.eoA	RTEL1	regulator of telomere elongation helicase 1	0.136330257902497	0.0411529711527556	1.65475203523411	0.102605443096425	0.999463745446798	-4.31710779826984
fVfRfUqGS_8YryG6Sc	COA3	cytochrome c oxidase assembly factor 3	0.0561106310406624	0.0210560906818869	1.65474397998117	0.102607083403954	0.999463745446798	-4.31711814421057
faIOVS7uFjtpIAdgsU	USP21	ubiquitin specific peptidase 21	0.0846590046714585	0.0134834143025949	1.65451806614536	0.102653095383768	0.999463745446798	-4.31740828300685
EXeLT7ie7rK_hPpMvo	RBSN	rabenosyn, RAB effector	-0.0620658004746009	0.00765377864111696	-1.6544142338652	0.102674248581508	0.999463745446798	-4.31754162168389
rlHuVRf9er9MKN4Lro	CNBP	CCHC-type zinc finger nucleic acid binding protein	0.0846307749590157	0.0122751430276925	1.65428479499012	0.10270062343789	0.999463745446798	-4.31770783305379
Be9JXOXCFXOeqEcSkQ	CENPO	centromere protein O	0.120565950801225	0.00159762299121847	1.654046172647	0.102749260287254	0.999463745446798	-4.31801421510046
HEvvqJ4lolIHRD0W6U	ZNF764	zinc finger protein 764	-0.134397500223129	-0.0432424374323052	-1.6539204114824	0.10277490090766	0.999463745446798	-4.31817567154983
HpR_L_11CrK7dP73pU	SNRNP70	small nuclear ribonucleoprotein U1 subunit 70	0.0441963484494604	0.00939511829696067	1.65315390796795	0.102931290797177	0.999463745446798	-4.31915949415428
xlHI6S5ezI6oAD5RT0	SSR3	signal sequence receptor subunit 3	-0.086846251536085	0.0319834912140757	-1.65304959552037	0.102952588638091	0.999463745446798	-4.31929334930982
uiddy_e_v.feeUF7h0	BIVM	basic, immunoglobulin-like variable motif containing	0.060753069678466	0.0120800184652302	1.65301333666751	0.102959992575186	0.999463745446798	-4.31933987537101
ckvq9KgOo_H6X0p1.o	ACTR2	ARP2 actin related protein 2 homolog	0.0776106598677417	0.00590486225646313	1.652911862401	0.102980715583607	0.999463745446798	-4.31947007859738
uEJV7aLfSOl6Aft5Uk	SLCO4A1	solute carrier organic anion transporter family member 4A1	-0.102481694313595	-0.0538128469635276	-1.65285020022256	0.102993309849553	0.999463745446798	-4.31954919476832
WGWVF51_.5Liq1JV4s	LCNL1	lipocalin like 1	-0.14235162518141	-0.0771595687738937	-1.65251158181983	0.103062493692602	0.999463745446798	-4.31998361423359
liUm8iEIle4AKUCUSU	NPM2	nucleophosmin/nucleoplasmin 2	0.129749435974606	-0.0250440548492102	1.65228057080233	0.103109713716254	0.999463745446798	-4.32027993600008
EQklMeOFEkFJ1Gl45I	CTSA	cathepsin A	0.0830500263047545	-0.0258110722930703	1.65200565530411	0.103165930991317	0.999463745446798	-4.32063252584729
EpJ.1qukppEvorByj8	DOT1L	DOT1 like histone lysine methyltransferase	0.127547956644368	-0.0686302190033323	1.651784214606	0.103211231355552	0.999463745446798	-4.3209164934981
l6J.qOJUm6K0TF0IJI	CNPY4	canopy FGF signaling regulator 4	-0.15323708301991	-0.0376391862243412	-1.65170220926389	0.103228011379096	0.999463745446798	-4.3210216454657
HRHtFKvP5NQqJ6D4sU	BAMBI	BMP and activin membrane bound inhibitor	-0.107636867415239	0.000889328736066912	-1.65162251617543	0.103244320391041	0.999463745446798	-4.32112382799358
0tMly5PHRu3uiOeuwE	B3GALNT1	beta-1,3-N-acetylgalactosaminyltransferase 1 (globoside blood group)	0.0839169825074034	0.00548545615223774	1.65103184845587	0.103365264507221	0.999463745446798	-4.32188104315532
6RqbXHiT464o6T7Wzo	SUPT5H	SPT5 homolog, DSIF elongation factor subunit	0.0559990600197512	0.0148681251274165	1.65089485115972	0.103393332282784	0.999463745446798	-4.32205663376527
T3QacRV9GQikpNotSQ	UCK2	uridine-cytidine kinase 2	-0.0790066882887798	0.000295748108660288	-1.65048020735235	0.103478321551032	0.999463745446798	-4.32258800577892
op9CKam5Xei1XFOHgo	ADAM15	ADAM metallopeptidase domain 15	0.132416136151189	0.00242651939413969	1.65015822558235	0.103544357090568	0.999463745446798	-4.32300054656755
fS.iCSd6Saquyu75HE	PTPRR	protein tyrosine phosphatase, receptor type R	-0.126724434979741	0.0315921550519994	-1.64993907325038	0.103589322826115	0.999463745446798	-4.32328129486594
cON9CdalehdFS6dOtc	ATP2A1	ATPase sarcoplasmic/endoplasmic reticulum Ca2+ transporting 1	0.219649382351672	-0.0808993432148396	1.64989761203662	0.103597831633775	0.999463745446798	-4.323334405556
cFFd_eAkevVe_CfnKg	AMD1	adenosylmethionine decarboxylase 1	-0.0913095565187407	-0.00602669819368777	-1.64975777925963	0.103626532766731	0.999463745446798	-4.32351351862521
Q.DSReOH6Sh_VRSrek	COQ7	coenzyme Q7, hydroxylase	0.121441535237963	0.0140718501637674	1.64956537141425	0.103666035663627	0.999463745446798	-4.32375995306985
oEIdIkILR80UKo6VKU	QTRT2	queuine tRNA-ribosyltransferase accessory subunit 2	0.121517193326796	-0.0133129900067572	1.64948412862835	0.103682719141967	0.999463745446798	-4.32386400035951
ia5MgDSucSdiKkiUS0	NADSYN1	NAD synthetase 1	0.0604132417785156	-0.00760958718157565	1.64943503468416	0.103692801805208	0.999463745446798	-4.32392687251181
opJV4Pp0G.uius.V4I	OTULIN	OTU deubiquitinase with linear linkage specificity	-0.0583907325599366	0.00107156020326689	-1.64866639504859	0.103850764971999	0.999463745446798	-4.32491100944357
fCn13KlFKeKHZUoToc	ABCF3	ATP binding cassette subfamily F member 3	-0.101350154100713	0.0470631876152123	-1.64679943142681	0.10423525881123	0.999463745446798	-4.32729966584715
EqLhnH31IhQqrZ.lIg	SLC22A1	solute carrier family 22 member 1	-0.159370308318981	0.0390059587351989	-1.64663878641988	0.104268396961263	0.999463745446798	-4.32750508578128
c9PSir.9NS5RJ0qB1o	FAM210A	family with sequence similarity 210 member A	-0.0905488020458361	-0.0309860939849636	-1.64638881005961	0.104319979560364	0.999463745446798	-4.32782469931933
BeikiyquvoiS8sQIpI	R3HCC1L	R3H domain and coiled-coil containing 1 like	0.103910717605906	0.0129139911963799	1.64593215846081	0.104414263071474	0.999463745446798	-4.32840844899078
B6qKIV_gC13fVJ1494	NUP210	nucleoporin 210	0.0663750824161839	-0.0443966139565954	1.64525313946154	0.104554586029246	0.999463745446798	-4.3292761850505
Q_i60UqoSolVRQ7NDo	ARL4C	ADP ribosylation factor like GTPase 4C	0.166560505821544	0.00821422177812224	1.64485944998305	0.104636014178268	0.999463745446798	-4.32977914229308
Q3dVN3rdAlLVJeF3RQ	HCN4	hyperpolarization activated cyclic nucleotide gated potassium channel 4	0.125401902139627	0.0212205253612486	1.64458453345182	0.104692906628101	0.999463745446798	-4.33013029661655
01BXNAw4H3SIpN6rXo	TMEM154	transmembrane protein 154	-0.100540160942865	-0.0422516634781893	-1.64419290054813	0.104773996240014	0.999463745446798	-4.33063044223658
ZVVCvevU.9d70QHF3o	HMGA1	high mobility group AT-hook 1	0.0605166440535191	0.00114181974452017	1.64400895230498	0.104812101262593	0.999463745446798	-4.33086532111217
BrwCBBHD4T5up.91f4	WRB	tryptophan rich basic protein	-0.0702025875058727	-0.0440030327481201	-1.64386391871821	0.104842153012728	0.999463745446798	-4.33105049402911
r97irgSgOX7oBKC1C4	HDAC9	histone deacetylase 9	-0.115954772235789	0.00207118893669622	-1.64275166041659	0.105072851508924	0.999463745446798	-4.33247008680669
xF7FPVH53_MlF1yg6I	ARHGEF12	Rho guanine nucleotide exchange factor 12	-0.0852850954309427	-0.0219141452282501	-1.64249405440559	0.105126341433408	0.999463745446798	-4.33279874903135
ivtSU0U01N1IL.U31Q	OGFOD1	2-oxoglutarate and iron dependent oxygenase domain containing 1	0.0730819360197172	0.0597607083833341	1.6423587733638	0.105154440356777	0.999463745446798	-4.33297132629995
l1_CQCLARpUmugUlPU	FAF1	Fas associated factor 1	0.0477578031504407	0.0207605142329001	1.64205312318738	0.105217948709563	0.999463745446798	-4.33336119501206
rqSigEWV3snnYOgKnc	DIDO1	death inducer-obliterator 1	-0.111778324194602	-0.0137752059146926	-1.64196092785506	0.105237111271555	0.999463745446798	-4.333478780821
0H6ylikog2fAVuK6K8	HSCB	HscB mitochondrial iron-sulfur cluster cochaperone	-0.0749962737695203	0.0166444585273841	-1.64161414306719	0.105309214949819	0.999463745446798	-4.33392101602775
HpZqJZGaYzoIoqQgqQ	CCM2	CCM2 scaffolding protein	0.0870294788976201	0.0355506205488395	1.64138791013972	0.105356275017098	0.999463745446798	-4.33420947249855
NohJKkvd3avQCEO6J0	GIT2	GIT ArfGAP 2	0.079743597502042	0.0243492643373133	1.64123299918056	0.105388508812865	0.999463745446798	-4.33440696965145
rV5VQHpwhJ.S9eHVQc	MRPL49	mitochondrial ribosomal protein L49	0.0692610712549379	0.0127286190463642	1.64110101141665	0.105415979072562	0.999463745446798	-4.33457522849813
usUhcLhCIeguvqeirk	DGKA	diacylglycerol kinase alpha	0.0910736401739241	-0.0302648184960808	1.64105757646778	0.105425020342138	0.999463745446798	-4.33463059696256
ulQHtA7Re87PbVz18E	FAR2	fatty acyl-CoA reductase 2	-0.0819947926236255	0.0552049590546385	-1.64087054148157	0.105463960087526	0.999463745446798	-4.33486900359321
ua7eec91ifZDllwoYQ	RPS25	ribosomal protein S25	0.0510682978621391	0.0117995642292352	1.64075978734134	0.105487024042395	0.999463745446798	-4.33501016620047
Nh0SQd1PMn9Ea.o7kk	NKRF	NFKB repressing factor	0.0616065038241241	0.00295271575269333	1.64058888098219	0.10552262240074	0.999463745446798	-4.3352279793429
9ToqQInSQKkJQgnggk	CARS	cysteinyl-tRNA synthetase	-0.0987783098359944	-0.0197443702783346	-1.64023513837044	0.105596334968054	0.999463745446798	-4.33567874434315
9To7ni3i_XOofoOqro	AQP7P1	aquaporin 7 pseudogene 1	0.231358552752816	0.0262286734311243	1.64013985934333	0.105616196263099	0.999463745446798	-4.33580014084001
3qwoqLpfiEfs9QHdeg	DSTYK	dual serine/threonine and tyrosine protein kinase	0.152205106446397	-0.0195262892470395	1.63956243967877	0.105736626528078	0.999463745446798	-4.33653570327095
xd1nAuhPVTAD7Unl6c	NLGN4X	neuroligin 4, X-linked	-0.141140456377334	-0.0321252899278488	-1.63952354187724	0.105744743299116	0.999463745446798	-4.3365852458848
TVvz5R54gp7X1wfuKI	ZNF549	zinc finger protein 549	0.115076105984477	-0.0300090963898947	1.63912425912077	0.105828090505781	0.999463745446798	-4.33709373506338
QCWSYU.SMW1ElKFniA	CHST10	carbohydrate sulfotransferase 10	0.0985297986933163	-0.00099829199825394	1.63901086533347	0.105851770296582	0.999463745446798	-4.3372381222821
HRIJUou7obeJUn95uU	CAPN15	calpain 15	-0.109203617641763	-0.0475759945392129	-1.63869629300948	0.105917484277212	0.999463745446798	-4.33763862780719
BqUICQfiX6nDeniy0s	ELF1	E74 like ETS transcription factor 1	-0.0690520979376101	0.0266963001549483	-1.63809654485822	0.106042862969372	0.999463745446798	-4.33840201854875
ohIepX1CtCU7t44T14	STK40	serine/threonine kinase 40	-0.0583685657769216	-0.0282741743654679	-1.63667567144248	0.106340379931433	0.999463745446798	-4.34020956748347
KogIndzEf71aie2nro	MAT2B	methionine adenosyltransferase 2B	0.131766312946567	0.0459019956189246	1.63628979873257	0.106421294596179	0.999463745446798	-4.34070020533488
iJ6LSpD1BQgHmkpauQ	MAFG-AS1	MAFG antisense RNA 1 (head to head)	-0.111924070854381	0.0212601633771085	-1.63620718042732	0.106438625529537	0.999463745446798	-4.34080524100138
We2op7nrrbsitfdf0Q	ITSN1	intersectin 1	-0.143529098469617	0.0561896661597763	-1.6358171259716	0.106520478575845	0.999463745446798	-4.34130106640177
c4rSi_iOJehBOkAVRc	FCF1	FCF1, rRNA-processing protein	-0.109498716618752	-0.0143683423092986	-1.63484025563452	0.106725698959141	0.999463745446798	-4.34254236309125
ZuoTiQOkg8qmLn9DnY	PRTFDC1	phosphoribosyl transferase domain containing 1	0.104868157456681	0.0329169936433586	1.63471952792461	0.106751083594939	0.999463745446798	-4.34269572348278
3aKUBUIK3pAtKdKiHc	IGFBP3	insulin like growth factor binding protein 3	0.151144636343794	0.0998979250167601	1.63401965151106	0.106898338473667	0.999463745446798	-4.34358457364998
fmfudo6fZP1UMVTwFs	ANKRD36	ankyrin repeat domain 36	0.0994499009596023	0.0195458377061398	1.63374304871124	0.106956581397225	0.999463745446798	-4.34393576667063
Kqe8HpKAj9JN4OLVJE	OGFRL1	opioid growth factor receptor like 1	-0.149693821657944	0.0275140087091568	-1.63366904800178	0.106972167728753	0.999463745446798	-4.34402971365569
ug5nc7oi6VFOXRFMo4	PEX2	peroxisomal biogenesis factor 2	0.0565503396647416	-0.0222886225632446	1.63356579353686	0.106993918680031	0.999463745446798	-4.34416079304092
lVJ4FYpwII4pCIA7FU	IFI27L2	interferon alpha inducible protein 27 like 2	0.0598870982228281	-0.0255048305991289	1.63348687472109	0.10701054564813	0.999463745446798	-4.34426097375229
fUQLhQgbiQlSkSWGWY	RPL36	ribosomal protein L36	0.043866958931154	0.000233900481172754	1.63346814380277	0.107014492268831	0.999463745446798	-4.34428475041113
KK8JCJAuU_.l.D6quo	LAPTM4A	lysosomal protein transmembrane 4 alpha	0.0854554943793882	-0.00377128525049616	1.63254808092009	0.107208495476397	0.999463745446798	-4.34545235514054
cX_eH1318VJIHRXqto	FAM110A	family with sequence similarity 110 member A	-0.0709938923128496	0.00410570912284191	-1.63228468182451	0.107264087861088	0.999463745446798	-4.34578651138444
NB56UHfE1UkDTalPo8	CCND2	cyclin D2	0.0463147536989026	-0.00164460912365304	1.63127029020592	0.107478401026165	0.999463745446798	-4.34707294223467
l6E.qgKnX6nnrgfe6U	PYCR1	pyrroline-5-carboxylate reductase 1	0.0901759677293375	0.0217052565526116	1.63108203169121	0.107518213007802	0.999463745446798	-4.34731160789612
WbfQoVL541QQCtQAqU	NAMPT	nicotinamide phosphoribosyltransferase	-0.096660263285329	-0.0196234688387759	-1.63085004663255	0.107567288482779	0.999463745446798	-4.34760567366486
Hqt4UpCe43gKJCgSQo	RAB20	RAB20, member RAS oncogene family	0.147369487624795	-0.0462636761043864	1.62920357095648	0.107916114842884	0.999463745446798	-4.34969166437809
EUn0lKhANV1QFHdRJ8	CREG1	cellular repressor of E1A stimulated genes 1	0.0688760867792308	-0.00180745429490042	1.62897209690192	0.107965228819245	0.999463745446798	-4.34998477521711
NRyo6oGDlA0h1FyJFI	TWSG1	twisted gastrulation BMP signaling modulator 1	0.0893942751705693	0.00966882121298128	1.62896163635165	0.107967448757404	0.999463745446798	-4.34999802030275
o9VPeUT3hTiGafkuqs	IP6K3	inositol hexakisphosphate kinase 3	0.131578220148485	-0.00344633411686595	1.62894363413106	0.107971269275457	0.999463745446798	-4.35002081442482
xV81EqjEujNwBSFVLo	TBC1D9B	TBC1 domain family member 9B	-0.0681712480566943	0.0285035984926826	-1.62831836387273	0.108104035049076	0.999463745446798	-4.35081237943955
TlH5LhFLiJP_gigUQg	URI1	URI1, prefoldin like chaperone	-0.0719713783876803	0.0350089205777927	-1.62830283955071	0.108107333061326	0.999463745446798	-4.35083202904232
6tA.FelCNZCllageeE	RPS9	ribosomal protein S9	0.0533487523029962	0.0150462960696505	1.62792248063843	0.108188162563869	0.999463745446798	-4.35131340758047
H1CV9Xe_gPq7lenVCo	ADORA1	adenosine A1 receptor	-0.133335413913093	0.0423983930260831	-1.62789700608954	0.10819357786872	0.999463745446798	-4.35134564426808
Noh415TR55AkgRiHQo	RAB3C	RAB3C, member RAS oncogene family	0.163308271583455	0.0642624730794547	1.62647933407789	0.108495288287425	0.999463745446798	-4.35313890974947
Bd6tDaCmc5Sh44j6bo	GARS	glycyl-tRNA synthetase	-0.0514166863220854	0.00760941521017637	-1.62633499350728	0.10852604513153	0.999463745446798	-4.35332141175366
NpISuiV51T5ROQ94gA	SHISA3	shisa family member 3	-0.159329777269813	-0.0455755879325342	-1.62609725788784	0.108576718454479	0.999463745446798	-4.35362196891546
W1J56DXFNUopKRJSog	LGALS9	galectin 9	0.0843254482067055	-0.0346354073568292	1.62605579160546	0.108585558948044	0.999463745446798	-4.35367438855359
0lQpzJV19DPhcGqiAI	TCP1	t-complex 1	0.123296091704029	0.057448042007626	1.6259115862322	0.108616307656649	0.999463745446798	-4.35385667644022
lkkLCXcnzL9NXFXTl4	SEL1L3	SEL1L family member 3	0.0846434082305367	-0.0902121351080224	1.62577317147169	0.108645828264377	0.999463745446798	-4.35403163066897
NESQvLL4l4U4t94d70	MAP4K5	mitogen-activated protein kinase kinase kinase kinase 5	-0.0618949903427126	0.04169082369036	-1.62570405805243	0.10866057095732	0.999463745446798	-4.35411898394726
6oVC17v028cU7vW4qI	ALKBH8	alkB homolog 8, tRNA methyltransferase	-0.140258262382582	0.0382764040519454	-1.62527706783388	0.108751688795055	0.999463745446798	-4.35465858710509
TX1R1PCKcrimfcr56o	ATP6V1F	ATPase H+ transporting V1 subunit F	0.0561040777461571	-0.00765687521031816	1.62513068830442	0.108782939762133	0.999463745446798	-4.35484354259642
KSN0K_Muu9HKIboPiE	SAP30	Sin3A associated protein 30	-0.0796862555233107	-0.0133647685017884	-1.62393465399336	0.109038556564643	0.999463745446798	-4.35635420471232
rqeVdVeRLL_17r8.7M	GRM2	glutamate metabotropic receptor 2	-0.138291383367838	0.0861388597109053	-1.62331999917387	0.10917010955179	0.999463745446798	-4.35713015654201
rJdVC9Q6P5fdAOxBwk	C1GALT1C1	C1GALT1 specific chaperone 1	0.076259485669933	-0.0107143192594793	1.6231420370354	0.10920822227186	0.999463745446798	-4.35735476941139
3ec8iVNeiVRd4FF1xQ	SPAG7	sperm associated antigen 7	0.0655912743109861	0.00669384619104853	1.62308914720618	0.10921955133427	0.999463745446798	-4.3574215193834
Zonn0tTdUik.rezf50	COQ5	coenzyme Q5, methyltransferase	-0.0508286761398411	-0.00729270687206669	-1.62199664010151	0.109453780170974	0.999463745446798	-4.35879988283949
rJqqQJJV9JJX9RB.JM	FOXI3	forkhead box I3	-0.118277923092581	0.00961528439149278	-1.62128416461437	0.109606750437307	0.999463745446798	-4.35969832381497
lUg7Su6L6mhCLeeOKE	ZNF197	zinc finger protein 197	-0.07402610511757	0.0244069896970678	-1.62073737773788	0.109724264068467	0.999463745446798	-4.3603875856539
HIXrpEnSp50S4KQxR4	CCT2	chaperonin containing TCP1 subunit 2	0.0594473263838287	0.046055224767454	1.62039301267588	0.109798326100618	0.999463745446798	-4.36082157251708
ZRJyUjIIR..dQDjl_o	ADI1	acireductone dioxygenase 1	0.118218937385853	0.0189968097716099	1.61991133054614	0.109901988440748	0.999463745446798	-4.36142847272865
rlnUn_Rv2NUClf.Klg	HIST2H4A	histone cluster 2 H4 family member a	-0.0869643863376359	0.0964393878023811	-1.61955477828284	0.10997877261515	0.999463745446798	-4.36187760854449
6wJ6DSQSVzqAUhAk_E	HDGFL3	HDGF like 3	-0.0854114034650429	0.0364623048922962	-1.61931999799155	0.110029356632773	0.999463745446798	-4.36217330353546
foFPOjsuTfIlMiSuHo	PIGH	phosphatidylinositol glycan anchor biosynthesis class H	-0.0648956666544142	-0.00533657029543427	-1.61928737362687	0.11003638712294	0.999463745446798	-4.36221438933634
BkLihuln_iLSX88o9E	FGD6	FYVE, RhoGEF and PH domain containing 6	-0.122573329473831	-0.015016378773479	-1.6190708231437	0.11008306254917	0.999463745446798	-4.36248708512831
3tC_VJ_i_3tGRO7Xus	PITHD1	PITH domain containing 1	0.0479865198486718	0.0143967576583842	1.61893706848299	0.110111900100378	0.999463745446798	-4.36265550193935
T0PiSyf41freqtgoI4	AEN	apoptosis enhancing nuclease	-0.0832913739764709	0.0147792755798741	-1.61877844784378	0.110146106673201	0.999463745446798	-4.36285521226299
K_ocSlRlFuXp6E7A.g	TMEM128	transmembrane protein 128	0.148321302276106	-0.0216998833210279	1.61873653522022	0.110155146572258	0.999463745446798	-4.36290797911449
fVHB4ktLL61.r5M45g	SNORD21	small nucleolar RNA, C/D box 21	-0.107179599550545	0.0124627660790489	-1.61752157058665	0.110417456033541	0.999463745446798	-4.36443704592506
33a4wBEV3euJUm1XX4	CACNG1	calcium voltage-gated channel auxiliary subunit gamma 1	-0.135546081356835	0.0167842041124445	-1.61749701663136	0.110422762399129	0.999463745446798	-4.36446793698661
B0iRUYDid0C9ApOUgw	RBM43	RNA binding motif protein 43	0.0957971005521869	-0.00562562768424691	1.61708156079957	0.110512577953897	0.999463745446798	-4.36499055268419
QlIBCV7r_CuJ7ijqHA	EHBP1	EH domain binding protein 1	-0.0600190409054157	-0.0131077270266665	-1.61688734622768	0.110554584567894	0.999463745446798	-4.36523481972443
B1LqutLKIkb0ioIlN0	ATP6V0E1	ATPase H+ transporting V0 subunit e1	-0.0735976837536932	0.00291251038104585	-1.61636071278182	0.110668554837538	0.999463745446798	-4.36589704133516
0e5.F1_V_7dK7rV5ec	COLGALT1	collagen beta(1-O)galactosyltransferase 1	0.0760079578475946	0.00770433738747681	1.6161899211161	0.110705536717965	0.999463745446798	-4.3661117632062
91x56u6iufjgOI3kD4	SFXN4	sideroflexin 4	0.148257982782866	-0.0460147614983047	1.61604928619542	0.110735996183428	0.999463745446798	-4.36628855605044
rKSYUZKIG6XooIHo68	UQCC3	ubiquinol-cytochrome c reductase complex assembly factor 3	0.0936827503492843	0.049609121251087	1.61571945365019	0.110807459623917	0.999463745446798	-4.36670313519692
Eg5j0Rf7ktaN0fppCo	CAT	catalase	0.083538082070421	0.00927506061489243	1.61568587795576	0.110814736416578	0.999463745446798	-4.36674533345073
idG61Svei9_169yedE	NUP133	nucleoporin 133	0.0600514194794539	0.0496145137368834	1.61528552192631	0.110901534496944	0.999463745446798	-4.36724844320872
ZTFRXx9el33qceUe7k	RRAS	RAS related	0.074460497828981	-0.0287112909020272	1.61512519022146	0.110936310152196	0.999463745446798	-4.36744989314905
33DqopptUt7vkkk900	SCCPDH	saccharopine dehydrogenase (putative)	0.0785944024686476	0.0325921011421141	1.6146434479465	0.111040852127259	0.999463745446798	-4.36805507218655
ooyO15fqtHAquF_9fk	MAP3K9	mitogen-activated protein kinase kinase kinase 9	0.142602084293663	-0.0361506109246407	1.61432141754607	0.111110779657175	0.999463745446798	-4.36845952471042
rlSJu0KiElE0ZSAxOE	GLT8D1	glycosyltransferase 8 domain containing 1	0.16345711597427	-0.0528701908332236	1.61428589780305	0.111118494793538	0.999463745446798	-4.36850413106105
Q5CeB9.Od9uUwdpP4U	SESN3	sestrin 3	-0.142238234469057	-0.0243702072677807	-1.61345347482065	0.111299426689644	0.999463745446798	-4.36954924729662
iLiYujnucbuA3t.mqU	HOXB5	homeobox B5	0.132893638984285	-0.0258218146308713	1.61343698958823	0.111303012248018	0.999463745446798	-4.36956993972983
Bn5UKURJALRQdAXH3w	NDUFS1	NADH:ubiquinone oxidoreductase core subunit S1	0.131288785830429	-0.00250011053413907	1.61342511618452	0.111305594785696	0.999463745446798	-4.36958484322893
xjYvpYo6OPukkglvkk	HAUS7	HAUS augmin like complex subunit 7	0.0624506380374615	0.0480315274907015	1.61336155646739	0.111319420233685	0.999463745446798	-4.369664621702
Wh36lF3vHx7HOgnXrg	PROSER1	proline and serine rich 1	-0.0580458420635453	-0.0240559762293891	-1.61208112259238	0.111598234178223	0.999463745446798	-4.37127117862399
c3ezqQKce017763qlE	RPAP2	RNA polymerase II associated protein 2	0.0662590106381461	0.0131205479469699	1.61135363667448	0.111756894689375	0.999463745446798	-4.37218343560312
rJFCEq0ju8ep6LuukQ	RPP38	ribonuclease P/MRP subunit p38	-0.148833991404619	-0.0233451415557514	-1.6107986173907	0.111878063512834	0.999463745446798	-4.37287916959862
fW1rQwDWXh15lVk5gA	NPW	neuropeptide W	-0.12435132412143	0.0724288434709663	-1.61060492698284	0.111920373888259	0.999463745446798	-4.37312191516885
0cKL9ey17Di_ldLTVY	HIST2H2BF	histone cluster 2 H2B family member f	0.125643021334324	-0.0118128172570434	1.61057480880522	0.111926954161914	0.999463745446798	-4.37315965886245
cuUXXtx0__TiV7eUlQ	GRINA	glutamate ionotropic receptor NMDA type subunit associated protein 1	0.0822984178760485	-0.0224172058448508	1.61039994038832	0.111965165892484	0.999463745446798	-4.37337878889546
WrtO_jZ.uHvTe1_Euk	QDPR	quinoid dihydropteridine reductase	0.0676947161143314	0.0143140682314333	1.61029377082764	0.111988370883156	0.999463745446798	-4.37351182086425
HXeXV.lSl.dIez1Neo	SPRYD4	SPRY domain containing 4	0.093588420009787	0.0253597151718333	1.61001775969709	0.11204871550644	0.999463745446798	-4.37385762934059
Zdd0ngRXX9HVA5AS3c	DMD	dystrophin	-0.144739300821416	-0.0597453636467205	-1.60969333426211	0.112119678518734	0.999463745446798	-4.37426402601292
xkuNKteQkuqCqlCs_g	ICAM1	intercellular adhesion molecule 1	-0.139639986637331	0.0114424368233255	-1.60909245311815	0.112251207611982	0.999463745446798	-4.37501653220029
cJSqpSF_9O7q3t9fOU	ZNF641	zinc finger protein 641	-0.123729326511831	-0.00230654759023754	-1.6088752287162	0.112298787263467	0.999463745446798	-4.37528850752775
od4ToRJShCedIXH1_o	WASH3P	WAS protein family homolog 3 pseudogene	0.0864459779794358	0.0175745470483609	1.6086478443535	0.112348609711107	0.999463745446798	-4.37557316776492
3wsLStXCVbVCC4RC6U	SFT2D3	SFT2 domain containing 3	0.093977929161461	-0.0194634800995102	1.60864445772127	0.112349351894603	0.999463745446798	-4.37557740717923
9OkiuiiEeCYeSJSCos	DYNLRB1	dynein light chain roadblock-type 1	0.0745661800125571	-0.011788449191782	1.60860072368259	0.112358936603523	0.999463745446798	-4.37563215308079
6lZNddzXv2KyIn6R94	ATP6V0A2	ATPase H+ transporting V0 subunit a2	-0.0688113156895631	0.0462534764510081	-1.60818516167533	0.112450043653418	0.999463745446798	-4.37615228242343
iohT6U1KA.bEngMyko	UAP1	UDP-N-acetylglucosamine pyrophosphorylase 1	-0.065925854631081	0.00249295518750902	-1.60797568983596	0.112495990439684	0.999463745446798	-4.376414416965
ZoEIAdygVXgVQiKihU	BOLA1	bolA family member 1	-0.0755474822361795	0.0173093045230987	-1.60768389858369	0.112560018867216	0.999463745446798	-4.37677951473243
ieueeSjOmp9kX.tBeQ	FBXL15	F-box and leucine rich repeat protein 15	0.0830992965606678	-0.0429291088512385	1.60681109366811	0.112751715786669	0.999463745446798	-4.37787123332693
T4jcV7etqH1NXkjp44	PRL	prolactin	-0.229919845807858	-0.0764822858930478	-1.6066986213109	0.112776437570305	0.999463745446798	-4.37801187627706
Ndeq.VPpu34nneuMFs	NEDD9	neural precursor cell expressed, developmentally down-regulated 9	-0.134022623718807	-0.0367594293068875	-1.60667444963668	0.112781751151695	0.999463745446798	-4.37804210098193
rVQkOyK78CpXeeni6Q	ELOVL6	ELOVL fatty acid elongase 6	-0.10042077724021	0.00488334730547852	-1.60660751560548	0.112796466097152	0.999463745446798	-4.37812579435942
rSCIghchekVJEhEl5c	FAHD2CP	fumarylacetoacetate hydrolase domain containing 2C, pseudogene	0.12773287578566	-0.0339854436009294	1.60622715502077	0.112880114897003	0.999463745446798	-4.37860133157109
EqVlAHqXPs3qm8SuB4	GRIA3	glutamate ionotropic receptor AMPA type subunit 3	-0.137864547496652	-0.0364658662738746	-1.60614846514357	0.112897426591887	0.999463745446798	-4.37869969899516
fEe0fhQx4V38XZUZoQ	RAC1	Rac family small GTPase 1	-0.0544771406046525	0.0151914103617312	-1.60608106609478	0.112912256016306	0.999463745446798	-4.3787839486623
lVUBVf_uIE1X4S_SXc	NUMB	NUMB, endocytic adaptor protein	-0.054454357116998	-0.00209103596003343	-1.60600287443354	0.112929462043373	0.999463745446798	-4.37888168519368
TCl_h31eKvl4D19Of0	SH2B3	SH2B adaptor protein 3	-0.0741024505330001	-0.0536930664572753	-1.60524186860807	0.113097031250068	0.999463745446798	-4.37983268627425
QjEJcolUlV.34UzRC4	RCBTB1	RCC1 and BTB domain containing protein 1	0.0963217138325975	-0.00587614190539014	1.60479124188518	0.113196351098311	0.999463745446798	-4.38039562425624
rVUQ7jrP6KV7d66.8o	ZNF564	zinc finger protein 564	0.0844125283595625	0.0395540520523103	1.60472631315933	0.113210667425639	0.999463745446798	-4.38047672351611
lh6COSF_vXvLoBHsK0	PRMT2	protein arginine methyltransferase 2	-0.121712527094177	-0.0219778123921226	-1.60451324149148	0.113257658475094	0.999463745446798	-4.38074283977921
66ciB0Sd6gAiiSEq9U	SLC43A3	solute carrier family 43 member 3	-0.0766392424676423	0.0305123905118117	-1.60418940671865	0.113329107415508	0.999463745446798	-4.38114723213591
WiU576kCQd.9BR500s	WDR37	WD repeat domain 37	0.0672890727370971	0.00374814224550238	1.60415506177037	0.113336687205211	0.999463745446798	-4.38119011641551
6VfL3ErxZULXahbn3I	VIRMA	vir like m6A methyltransferase associated	0.0739413138614119	0.0281690040024818	1.60403563613133	0.113363047133716	0.999463745446798	-4.38133922884497
iTugUQkl9JUIgt3vB0	ZNF250	zinc finger protein 250	-0.0961859392788019	0.00688401509362283	-1.60337736971904	0.113508429976205	0.999463745446798	-4.38216094525598
lg247UMSKSLWrUnQEo	SRP19	signal recognition particle 19	-0.0636162612409095	0.00842323302368794	-1.60333098729425	0.113518679525513	0.999463745446798	-4.38221883301017
ZmpehHzqhJMX6HhxSc	HNF1B	HNF1 homeobox B	-0.0867346672506157	0.0134731121769118	-1.60296111884384	0.113600439413203	0.999463745446798	-4.38268039403405
icmjQs6EeHSHiiSdR4	OGG1	8-oxoguanine DNA glycosylase	0.0964040591686816	0.0369531641000749	1.60069876573351	0.114101567834004	0.999463745446798	-4.38550148397163
lRfyRoy.XrVC6u6JfU	ACAT2	acetyl-CoA acetyltransferase 2	0.0619086823863358	-0.0129644536042674	1.60069119566042	0.114103247644431	0.999463745446798	-4.38551091753671
HVaFPTXgLLF0n1I0fo	POC5	POC5 centriolar protein	-0.0555596033759487	0.0192433539286669	-1.60050708135064	0.114144109011129	0.999463745446798	-4.3857403419347
3.d4LruoLFKoekglSk	DHTKD1	dehydrogenase E1 and transketolase domain containing 1	-0.0631503204987763	-0.044527226889907	-1.60042272352887	0.114162834878108	0.999463745446798	-4.38584545197143
fkuElWlCUXcNd7JDBo	SLC6A9	solute carrier family 6 member 9	0.106168817502022	-0.0251524389717723	1.60004291214675	0.114247176563481	0.999463745446798	-4.38631863521046
To1KZJIELV4.7RfX8U	MSH3	mutS homolog 3	0.0726960028305243	0.0101924168732659	1.5998691232455	0.114285785195404	0.999463745446798	-4.38653511376503
BL4hFy7OnTlSX1F6j0	MED17	mediator complex subunit 17	-0.143815281326728	0.00901884655243745	-1.59939049829915	0.114392169931978	0.999463745446798	-4.38713119765652
u7WvHH6UUZJfp1xJUA	RIPK1	receptor interacting serine/threonine kinase 1	0.0881727384876996	-0.00653744563932044	1.59911227295979	0.114454048136223	0.999463745446798	-4.38747762725688
fgx9354iWOVtVqUkqM	SELENOM	selenoprotein M	-0.11419170160055	-0.00966565081336159	-1.59894982773972	0.114490188921595	0.999463745446798	-4.38767986893279
l9c44oX.RIXseJ1uKM	SNORD25	small nucleolar RNA, C/D box 25	0.102618646679869	0.00553868614570435	1.59887241472951	0.114507414984937	0.999463745446798	-4.3877762402855
9COUpVUrvdKkvfrt58	BRMS1	breast cancer metastasis suppressor 1	0.059628243710957	-0.00477113175376509	1.59858201730465	0.114572053253436	0.999463745446798	-4.38813771771263
fJ54BO0IlgoPSPlgIU	NDUFAF4	NADH:ubiquinone oxidoreductase complex assembly factor 4	-0.0925092933822872	-0.0283420945070288	-1.5985357745482	0.114582348931119	0.999463745446798	-4.38819527368754
QxeSeVSihiijvSOiQs	GPR108	G protein-coupled receptor 108	-0.096485462175725	0.023132617010441	-1.59734610706973	0.114847477354774	0.999463745446798	-4.38967546916615
NiOtCuv9T7kD30XtLo	PDE5A	phosphodiesterase 5A	0.164585257589757	-0.0198937770831929	1.59731294586843	0.114854874697915	0.999463745446798	-4.38971671423938
uRe0DtEjeoqh8IfNOU	GOLGA2P10	golgin A2 pseudogene 10	-0.0870122514379247	-0.00346175340844055	-1.59723704999753	0.114871806401217	0.999463745446798	-4.38981110868574
NGgYGkd8Ur8WklDVLU	NET1	neuroepithelial cell transforming 1	0.109539899345207	0.000305208363244072	1.59678127534101	0.114973527958053	0.999463745446798	-4.39037788605614
Z3uhLknqp.Ojf6u7Ko	KCNK4	potassium two pore domain channel subfamily K member 4	-0.144876504584793	-0.0272633447772288	-1.59581849464345	0.115188643206552	0.999463745446798	-4.39157466416739
Tv66R568VepXg6JwDQ	ZNFX1	zinc finger NFX1-type containing 1	0.0558355622600458	-0.00417065694476462	1.59579734592721	0.115193372119308	0.999463745446798	-4.39160094554335
ER1CPOl2pC5764iHeg	HEXB	hexosaminidase subunit beta	0.044945330816362	0.0171211563979901	1.59547667360434	0.115265094485214	0.999463745446798	-4.39199940405759
NE_8qgdKcu0m36.qiA	FAM102A	family with sequence similarity 102 member A	-0.0862225063613638	-0.0477474355253194	-1.59544606487637	0.11527194238565	0.999463745446798	-4.3920374337909
Tp3nvutucBZ13CjuXc	GBA	glucosylceramidase beta	0.0685358151197915	0.0175808203406196	1.59497340831623	0.115377728425263	0.999463745446798	-4.39262460014738
TU4d1Lv.3voURW0S9E	CDC42EP3	CDC42 effector protein 3	0.101343852881955	0.0314240248179181	1.59492161376452	0.115389325391662	0.999463745446798	-4.3926889332332
9Xu4nvCuUD6e0.s9OE	KLF3	Kruppel like factor 3	0.150281284781637	-0.0479414588906217	1.59478691647463	0.115419488934229	0.999463745446798	-4.39285622939827
9NVUCF94_C07EvS6XA	SLC25A43	solute carrier family 25 member 43	-0.064551552854121	-0.00828133160830359	-1.59465208923777	0.115449687923543	0.999463745446798	-4.39302367404341
3alFMtEekeAICb5Xrg	AKAP17A	A-kinase anchoring protein 17A	-0.0718138667315747	-0.0113044304930311	-1.5934920601682	0.115709777017528	0.999463745446798	-4.39446380344521
Ed2iSvih7ueHugoLpc	TGM5	transglutaminase 5	-0.113688969640454	0.0790302148445688	-1.59342802949107	0.115724146980885	0.999463745446798	-4.39454326709157
WeB6vK5Z755274NyBY	UQCRH	ubiquinol-cytochrome c reductase hinge protein	0.0376648164841505	-0.0228087696148364	1.59289322994368	0.115844224373814	0.999463745446798	-4.39520685263537
0rUwFYu5f5.UV_chHo	SEMA6A	semaphorin 6A	-0.154439418088611	-0.0932811522764965	-1.59260001499429	0.115910101776125	0.999463745446798	-4.39557059085905
TN6X5VSSxLX1wwao50	PRKY	protein kinase, Y-linked, pseudogene	-0.12531934211996	0.0316071820529711	-1.59198151344703	0.116049160916267	0.999463745446798	-4.39633765223603
ZrCHlEtVSopEe7.Hj4	SLFN5	schlafen family member 5	-0.111075673535126	0.000706041187788582	-1.59131235720858	0.116199759777323	0.999463745446798	-4.39716722881034
Nogju3mnfSq1ySjglM	THOC5	THO complex 5	0.062275112048036	0.00481118125908686	1.59020425102219	0.116449492957429	0.999463745446798	-4.39854028668842
3U4t_f_nTEoiKgp5Sk	TXNL4B	thioredoxin like 4B	-0.118107662480435	0.0173381302050776	-1.590196611484	0.116451216170137	0.999463745446798	-4.39854974983253
9HRvEhV3FX0l5XEmH0	MRPL4	mitochondrial ribosomal protein L4	0.0830422950926737	0.0279877383660114	1.58998000871365	0.116500082703906	0.999463745446798	-4.39881803977207
WAC.p_Xuw5UdX1V6dU	WDR77	WD repeat domain 77	0.0918456209171044	-0.0115116453075309	1.58991822984637	0.11651402330473	0.999463745446798	-4.39889455459885
6Up7AJAF2zSd6BDF5I	KDM3A	lysine demethylase 3A	-0.108449913808902	-0.0406117113070058	-1.58987088115762	0.116524708595951	0.999463745446798	-4.39895319541447
cpXr4AsdN163hNQItE	MAPKAP1	mitogen-activated protein kinase associated protein 1	0.0764273788143934	0.011881763885078	1.58984300027503	0.116531000909142	0.999463745446798	-4.39898772482615
HiibxNeM19Snnwg6Hk	CDC14A	cell division cycle 14A	0.11295715787001	0.007843737337541	1.58955500263035	0.116596013792199	0.999463745446798	-4.39934436658313
ud6PeXcK1RJ170p9XA	NGDN	neuroguidin	-0.127920951984095	0.0234323389627587	-1.58952724163343	0.116602282126772	0.999463745446798	-4.39937874128312
3tAR_4f_fw9Tg715dc	ACSL4	acyl-CoA synthetase long chain family member 4	-0.075378888512605	-0.0565072568846672	-1.58925944723056	0.116662763048503	0.999463745446798	-4.39971030612599
KVeVX_o.H1FNA30HvI	RBM27	RNA binding motif protein 27	-0.0590049024799919	0.0100527481288873	-1.58889757811504	0.116744530601227	0.999463745446798	-4.40015826682517
91f4XHpTfXRJXSM0Go	CYB5D2	cytochrome b5 domain containing 2	0.0671598521414005	0.0125614866461253	1.5888505461882	0.116755161262305	0.999463745446798	-4.40021648118487
uqLEuU8oUkLhEoPeDU	PARP2	poly(ADP-ribose) polymerase 2	-0.0693580961617673	0.00935250075644265	-1.58842428426888	0.116851545003641	0.999463745446798	-4.40074402046173
KXir5UsuIiaJ_nkj0s	SLC7A5P2	solute carrier family 7 member 5 pseudogene 2	-0.131993935549751	-0.0206751107282548	-1.58797657538084	0.116952846969088	0.999463745446798	-4.40129796315657
uXaSCn_gxnCFNVAVAU	JHY	junctional cadherin complex regulator	0.141431263678502	0.0537118831731813	1.58794626215119	0.116959708414781	0.999463745446798	-4.40133546405077
37oASMOi_qSglzpU10	PROCR	protein C receptor	-0.113951480686853	-0.0182683523471868	-1.5875267540815	0.117054697888373	0.999463745446798	-4.40185437583803
urjl2bEo3rxe5L7gxU	MTCH1	mitochondrial carrier 1	-0.0495286474132885	-0.00522819636759906	-1.58744894784525	0.117072322408371	0.999463745446798	-4.40195060472955
H66G8L2iqWW31UFKJI	TYMP	thymidine phosphorylase	0.143762985677198	0.0294390272807315	1.5864929122526	0.117289055681997	0.999463745446798	-4.40313265491605
6SUT9IXniHni4oOkuI	C21orf33	chromosome 21 open reading frame 33	0.0547368979893037	-0.0186621548689512	1.58571225466566	0.117466269461172	0.999463745446798	-4.40409738375168
EuDnMgPkqi1AqeZ91Y	SNORA14B	small nucleolar RNA, H/ACA box 14B	0.119393388734412	0.0640557671356661	1.58537825391437	0.117542155151605	0.999463745446798	-4.40451000601121
r3RTXs99BS41VF2tHU	FHIT	fragile histidine triad	0.0993640108392399	0.00153583378253957	1.58471626106204	0.117692677583951	0.999463745446798	-4.40532759275394
Ekn8z0M47l7AUKL.VY	RAD21	RAD21 cohesin complex component	-0.0793657693166494	0.00119322916421947	-1.58450347731643	0.117741092694658	0.999463745446798	-4.40559032262749
T3p2gk3kQf4pR0eRVE	ABHD16A	abhydrolase domain containing 16A	0.0694175113054557	-0.000226802720138554	1.58433471001915	0.117779504014551	0.999463745446798	-4.40579868126857
Hic6UQblzRELUl0bSc	PAX8-AS1	PAX8 antisense RNA 1	0.152335965754082	-0.0779287730461919	1.58392894121587	0.117871897849511	0.999463745446798	-4.40629955690286
QDxzvalteTded2uVlo	CYBA	cytochrome b-245 alpha chain	0.0455020300779229	-0.047883681554516	1.58343501851536	0.117984442826674	0.999463745446798	-4.40690909030089
rTUh4oIVoB8qlG4lGk	RPL27A	ribosomal protein L27a	0.0505025402869802	0.00712806761059245	1.58298123562729	0.11808791751009	0.999463745446798	-4.40746893535651
WO_UG596pV7R5Z6OWY	PRKX	protein kinase, X-linked	0.0811278965090731	0.0347786960865975	1.58291949153996	0.118102002442809	0.999463745446798	-4.40754509948426
KFCEmnVxzUuB3K_LFE	HARBI1	harbinger transposase derived 1	-0.111842822964135	-0.029496768819508	-1.58268942994204	0.11815449547764	0.999463745446798	-4.40782886697367
W6TMoe6re7uy4i7slE	NDFIP2	Nedd4 family interacting protein 2	-0.0551437544220997	-0.0369602343018046	-1.58249001757953	0.118200010427042	0.999463745446798	-4.40807479992592
oOpysAqp5.3vCTYysI	GTPBP8	GTP binding protein 8 (putative)	-0.0887811496007664	-0.00210496971949023	-1.58180111327983	0.118357357831627	0.999463745446798	-4.40892419962986
rlU_JFNUR6eeN_.vio	ZFAND2A	zinc finger AN1-type containing 2A	-0.0691645315991983	-0.0180312064979887	-1.58158627060967	0.118406462752748	0.999463745446798	-4.40918902546146
6apqguBVhrSZ.tN6.Q	NSUN5P1	NOP2/Sun RNA methyltransferase family member 5 pseudogene 1	-0.127903792752591	-0.0244363542303587	-1.58115170383191	0.118505838236306	0.999463745446798	-4.40972459369519
liCCuA37ni6u3d0ClI	ATP5H	ATP synthase, H+ transporting, mitochondrial Fo complex subunit D	-0.0515169831621688	-0.010273556702569	-1.58111446528067	0.118514356950394	0.999463745446798	-4.40977048092396
E0S1flzu6SLtUlI7uU	CD84	CD84 molecule	-0.0817729763430285	0.0367676979817247	-1.58034181417517	0.118691219875305	0.999463745446798	-4.4107223578038
lsRoeDeRIkI54ui2qk	HLA-DRB6	major histocompatibility complex, class II, DR beta 6 (pseudogene)	0.0685577770642543	-0.026775476808604	1.5802382515704	0.118714941838198	0.999463745446798	-4.41084991067704
ipeYnqAoSOKoXbl9_c	SLC8B1	solute carrier family 8 member B1	0.0662800503761156	0.0442630946503253	1.57977815282928	0.118820377611695	0.999463745446798	-4.41141649884424
NRcFEbkMC125eedElU	TNFRSF13B	TNF receptor superfamily member 13B	0.0624227685908513	0.0188573101639859	1.57967605897094	0.118843783509885	0.999463745446798	-4.41154220177905
fkVPSgF4EqCuBV7XhQ	DGUOK	deoxyguanosine kinase	0.136572153066215	0.0191178364905058	1.57965821030947	0.118847875848988	0.999463745446798	-4.41156417715818
fj7uAeVJ0qMFKhPRe4	FAM213A	family with sequence similarity 213 member A	-0.0759426901112441	-0.0328998183202461	-1.57934522971125	0.118919654358773	0.999463745446798	-4.41194948385158
T5N2a7u1H3VdH9V0VM	RAB6B	RAB6B, member RAS oncogene family	-0.145089471921929	-0.0896688137226752	-1.57931996583587	0.118925449853629	0.999463745446798	-4.41198058286296
Kkjn_VKfdFGuxajPAU	HADHA	hydroxyacyl-CoA dehydrogenase trifunctional multienzyme complex subunit alpha	0.0652447531037401	0.0058401682784521	1.57918830173835	0.118955657062067	0.999463745446798	-4.41214264973447
rq8wB_7ggj6X3UXde4	USP46	ubiquitin specific peptidase 46	0.0727088585348466	-0.000254911844327725	1.57896305676277	0.119007348441476	0.999463745446798	-4.41241987774917
9UF3V6JQXsALq_PnhI	PLLP	plasmolipin	0.0963680063858002	0.0501927484910166	1.57890650910745	0.119020328366216	0.999463745446798	-4.41248947004545
KJLSlERT51QDofd5CU	APOBEC3F	apolipoprotein B mRNA editing enzyme catalytic subunit 3F	-0.0618449077356306	-0.00449388332207988	-1.57882708579939	0.119038561073963	0.999463745446798	-4.41258721119345
reEHuCUV6nEgFEt9Uk	ST3GAL5	ST3 beta-galactoside alpha-2,3-sialyltransferase 5	0.0697610244514877	-0.0657681753817635	1.57845074489729	0.11912498570751	0.999463745446798	-4.41305028856292
3JikV8enxddOklx3X4	TP63	tumor protein p63	-0.122640881688861	-0.0405132978353391	-1.57839101074607	0.119138707950827	0.999463745446798	-4.41312378054716
QIigNLZ4s8.h1rdfrk	AGAP1	ArfGAP with GTPase domain, ankyrin repeat and PH domain 1	-0.20504558382865	0.0212581111570858	-1.57807277355444	0.119211835352694	0.999463745446798	-4.41351527052779
KJTdSrhoFS7PF56BQo	RNFT2	ring finger protein, transmembrane 2	-0.0704963412293411	-0.0112299494158449	-1.57785286601735	0.119262388688475	0.999463745446798	-4.41378575485792
f0LQV4ks6o4uOX0lAk	SERPINB10	serpin family B member 10	0.0908457056252349	-0.0037711725112989	1.57762540325748	0.119314696919651	0.999463745446798	-4.41406549577244
0OO0kefWtrpn3d6ViU	STK16	serine/threonine kinase 16	-0.0955584379215954	-0.00197326345892474	-1.57709506872422	0.119436726109487	0.999463745446798	-4.41471757473509
oeEuIRBveB7irtUoAI	FAM81A	family with sequence similarity 81 member A	0.0902979361403748	-0.0109879548816624	1.57694128223543	0.119472130842777	0.999463745446798	-4.41490662718592
lm9UPOn3dI1Jfgvf4U	UBE2L3	ubiquitin conjugating enzyme E2 L3	0.0853266516038755	-0.00437875530506321	1.57691756537462	0.119477591687721	0.999463745446798	-4.41493578124157
9yihU7I9kjpejqKCpI	SPR	sepiapterin reductase	0.109986408176088	0.0649433149074532	1.57685767896293	0.119491381519023	0.999463745446798	-4.41500939509209
uQqdUqQFw9VUAbgtqg	BCL7A	BCL tumor suppressor 7A	0.0949300142011594	0.0313840694141742	1.57668218658205	0.119531798867214	0.999463745446798	-4.41522509991722
u1dXxVTXwf7NenzBKU	ADIPOR1	adiponectin receptor 1	-0.0615811119503336	-0.0224829426391246	-1.57641034725286	0.119594427329574	0.999463745446798	-4.41555918534173
35p0LR0invk.SpzvrU	SAE1	SUMO1 activating enzyme subunit 1	0.0421187863551074	0.0201901327046414	1.57635030353148	0.119608264212465	0.999463745446798	-4.41563297084147
xxdKhSDW6gqOheu9W8	FAM118A	family with sequence similarity 118 member A	-0.11223145031674	-0.0109760636349516	-1.57632833751237	0.119613326531358	0.999463745446798	-4.41565996342446
opuUung.BGiFFUnGBI	SIRT5	sirtuin 5	0.0914182406977848	0.0309753419137798	1.57611102441792	0.119663418051096	0.999463745446798	-4.41592698652287
3nq_5PCpS.H7eXf4UU	ADAP2	ArfGAP with dual PH domains 2	-0.102923401818964	-0.0689770141210212	-1.57596150923818	0.11969789163938	0.999463745446798	-4.41611068349193
ipPJ4SnrBLURCOsyl4	PIGV	phosphatidylinositol glycan anchor biosynthesis class V	-0.232225977542188	-0.00574786311851078	-1.57466590537163	0.119996951058855	0.999463745446798	-4.41770181745107
H34p74gHyhIJcXTVKU	NAGA	alpha-N-acetylgalactosaminidase	-0.12341828540088	-0.0231719574611746	-1.57463906629819	0.120003152540465	0.999463745446798	-4.4177347659186
xOeen.eCErn4H7S.v8	WWP1	WW domain containing E3 ubiquitin protein ligase 1	0.0552206927489243	0.0160241905853859	1.57400940630151	0.120148716472084	0.999463745446798	-4.41850760835769
Ht3EJkrhd6N9fgKopI	RRP8	ribosomal RNA processing 8	-0.0556270948411316	0.0274641555824544	-1.57383036269209	0.120190133324869	0.999463745446798	-4.41872731420225
ZxRe5qp3tNGVe6NNHk	TMPRSS3	transmembrane protease, serine 3	0.136020897914189	0.0137037731419461	1.57372588620466	0.120214306388059	0.999463745446798	-4.41885550756951
WSauUpGu0kpBOliKWo	MIR564	microRNA 564	0.155298096910221	-0.0338462055879013	1.57361612112277	0.120239707282049	0.999463745446798	-4.41899018169014
cSXEN7hRRCO5XjpJ4I	TOMM6	translocase of outer mitochondrial membrane 6	0.0516914562091025	0.0212132293411586	1.5734743640791	0.12027251783743	0.999463745446798	-4.41916409500411
BeS17p6hEi0nji94xQ	CEP19	centrosomal protein 19	-0.108575379752124	0.00643107102599517	-1.57309893187293	0.120359448592241	0.999463745446798	-4.41962462125867
cdCVX1_d6FXysxXoIk	MPI	mannose phosphate isomerase	0.0811396507850053	0.0190264588408623	1.57251833680397	0.120493983495968	0.999463745446798	-4.42033661380027
9tcizknrAFIpxNSzx4	RAP1BL	RAP1B, member of RAS oncogene family pseudogene	-0.0758972502075503	-0.0332674009550259	-1.57238227977631	0.120525527890198	0.999463745446798	-4.42050342781072
BSEI6J50f_Wr_ulH0U	ZNF324	zinc finger protein 324	0.0806715656914794	0.0113512050195522	1.57170588422955	0.120682446164224	0.999463745446798	-4.42133253291949
uRrneh55uutPd3Rp7Q	CASP9	caspase 9	0.140127433974699	0.036414325704185	1.57157333370345	0.120713215955407	0.999463745446798	-4.421494971067
9V6Rerq.iehIJ8iECk	MTFP1	mitochondrial fission process 1	-0.0808717040324661	0.0396588674994865	-1.57154613848802	0.120719529728502	0.999463745446798	-4.42152829673586
9cucSQeISQUIpCAXqM	CD44	CD44 molecule (Indian blood group)	0.12995354028977	0.013168177590454	1.57152517936948	0.120724395879366	0.999463745446798	-4.42155398018194
NZ7vErPxfnuj54ejrU	SLC41A2	solute carrier family 41 member 2	-0.0842404576991522	-0.0401877600041973	-1.57146755898069	0.120737774612569	0.999463745446798	-4.42162458698172
QeVmH2TSoWTnj_x53c	DNAL4	dynein axonemal light chain 4	-0.0639662194883878	0.00121385917236612	-1.57126817317365	0.120784078655496	0.999463745446798	-4.42186889182619
xoQoh1bJOFXujuUuEA	CAPRIN2	caprin family member 2	-0.102275234718278	-0.0115887001994771	-1.57095120874376	0.120857717622208	0.999463745446798	-4.42225720582863
lXuCTBVHH1IfldX6qE	CPT1A	carnitine palmitoyltransferase 1A	-0.109637828320208	0.00914856345429337	-1.57092200621536	0.120864503924973	0.999463745446798	-4.42229297831966
uSSLzos0g39ToBdTOk	MBNL3	muscleblind like splicing regulator 3	-0.125335109886719	-0.048515279985421	-1.57085926727346	0.120879084702154	0.999463745446798	-4.42236983016246
ljhMe8iFHo8khXrkuE	CBWD5	COBW domain containing 5	-0.0741537052050382	0.0236424969488074	-1.57065930587755	0.120925565906968	0.999463745446798	-4.42261475341342
EpeB.5BBO4gZEeyIJU	ZNF555	zinc finger protein 555	0.145157369012296	-0.0660901800648342	1.57052903715347	0.120955854677925	0.999463745446798	-4.42277429805599
cRJ0uV9031e6q_DyS0	NXPH2	neurexophilin 2	0.105645422802868	0.00163138045180326	1.57049635796014	0.120963453866627	0.999463745446798	-4.42281431950155
TlIohSKfq.44DWkEkk	STX8	syntaxin 8	0.0512311650866423	0.00452512138987268	1.56938123489878	0.12122299244442	0.999463745446798	-4.42417952786027
ijU0QJgtOoiUR_Ougw	POMP	proteasome maturation protein	-0.0488312442687127	0.0155554653336719	-1.56895331347641	0.121322706885143	0.999463745446798	-4.42470318223886
ZfEgo719KKCSRwCR3g	RPS27	ribosomal protein S27	-0.0496009253388416	-0.0169656113832449	-1.56845201424979	0.121439603260528	0.999463745446798	-4.4253164639327
ioSSItD9X9vqLqS6ro	DTX1	deltex E3 ubiquitin ligase 1	0.115617159473792	0.00557109743971086	1.56835859105845	0.121461398269498	0.999463745446798	-4.42543073657921
0Ug6h7gerHfFOSEROU	CGRRF1	cell growth regulator with ring finger domain 1	-0.0562195380620228	0.0073416882308784	-1.56823623527129	0.121489947790482	0.999463745446798	-4.42558038934523
NmmkE6aG4wO0u4F6KU	MED27	mediator complex subunit 27	-0.0808244618528592	0.00880182225909367	-1.56809430298256	0.121523071856689	0.999463745446798	-4.4257539726421
0F3kV4KyUxI5YSNRAo	HEY2	hes related family bHLH transcription factor with YRPW motif 2	-0.182413917115622	-0.00860851115772963	-1.56808807441791	0.121524525640457	0.999463745446798	-4.42576158985191
ZtVAXJynC0I0E9Sr6w	PTPRF	protein tyrosine phosphatase, receptor type F	-0.161382898293741	0.0205656204605734	-1.56685613636254	0.12181234069622	0.999463745446798	-4.42726764121143
r3nVfHPekFSlWLUI3Y	MPND	MPN domain containing	0.10934010813309	-0.0385739480542087	1.56664061556867	0.121862748307056	0.999463745446798	-4.42753100522323
fX.X0i4NNSHXToytq4	ACO1	aconitase 1	0.0501636205524472	0.0139406066924349	1.56659961259462	0.121872340275748	0.999463745446798	-4.42758110664492
0qXgt_Sh0ejI7z2HX0	NBPF10	NBPF member 10	-0.13395984188689	-0.00908449548979963	-1.56655384545153	0.121883047455739	0.999463745446798	-4.42763702797346
xyHx56EN5OpNFXVZOw	CAMK2G	calcium/calmodulin dependent protein kinase II gamma	-0.10145558596362	0.0110284037688099	-1.56652844338946	0.121888990568642	0.999463745446798	-4.42766806525072
ZTQ9e47V6qw9B32LZA	CCDC15	coiled-coil domain containing 15	0.122939957011244	0.0154699527712476	1.56627869408472	0.121947434705804	0.999463745446798	-4.42797319461274
rOi3ipphpxenWiDqz8	SNRNP70	small nuclear ribonucleoprotein U1 subunit 70	0.0698979867188022	0.0145502544792559	1.56606264578479	0.121998010493816	0.999463745446798	-4.42823711408027
c6Oipeigiq3yKPR07U	HCG26	HLA complex group 26 (non-protein coding)	0.105547010541815	-0.0233455729201934	1.56598537256106	0.122016103824451	0.999463745446798	-4.42833150111818
it5Legn7edzIDgDkk4	PDP1	pyruvate dehyrogenase phosphatase catalytic subunit 1	-0.12417860551987	0.000157772774720796	-1.5657753196205	0.122065298028166	0.999463745446798	-4.42858805323492
coan3AiF50x_cXX1Lo	RPUSD2	RNA pseudouridylate synthase domain containing 2	0.0525381164434993	0.022918883027436	1.56516896396795	0.122207394871044	0.999463745446798	-4.42932846031589
fIiifq_fV7VZVd7pPs	BCORL1	BCL6 corepressor like 1	0.137511950945145	0.0670231639630754	1.56453425252038	0.122356278317343	0.999463745446798	-4.4301032106257
9Cl719JCX1BJ69Uugo	ZP3	zona pellucida glycoprotein 3	0.117021787444944	0.0203682188116199	1.56413044777951	0.122451073667832	0.999463745446798	-4.43059595856603
fiSgOZ4dSJ6Va5I8K8	TFPT	TCF3 fusion partner	0.0671814870725778	0.00442548112942914	1.5632065595113	0.122668182106426	0.999463745446798	-4.43172290686991
NE01SK670u0hd8OpS4	DNAJA1	DnaJ heat shock protein family (Hsp40) member A1	-0.0466214668888559	0.00630993559062257	-1.56320324198162	0.122668962260438	0.999463745446798	-4.43172695245542
i1LnXep34vnn4PluyE	UBAC1	UBA domain containing 1	0.0530794953976313	0.00691999416920509	1.56309670294801	0.122694018206416	0.999463745446798	-4.43185686806645
f9umu8eFepuuHNsel8	ICAM3	intercellular adhesion molecule 3	0.0572322960964797	0.0206930650478914	1.56270234112269	0.122786800143028	0.999463745446798	-4.43233768937018
0AmKRHnx5fqvuiOhW4	NELFB	negative elongation factor complex member B	0.0536218760847029	0.0282913794095612	1.56259961392714	0.122810978078386	0.999463745446798	-4.43246292012142
QopS7BvE4dviAvig.U	WSB2	WD repeat and SOCS box containing 2	-0.0806417673828001	-0.0109334543944041	-1.56223586233051	0.122896621441662	0.999463745446798	-4.43290629498492
0IiH14JJlUUJ0Il01k	OAS1	2'-5'-oligoadenylate synthetase 1	0.0882130876555148	-0.0742729661138445	1.56203477276871	0.12294398736558	0.999463745446798	-4.43315136137608
l6up6QiuLkl.hVB19w	UFSP1	UFM1 specific peptidase 1 (inactive)	0.13795361171896	-0.0321063064352612	1.56155671525025	0.123056650612679	0.999463745446798	-4.43373385056757
xqCi_0_44pH6Kr3quU	C12orf65	chromosome 12 open reading frame 65	-0.0712794257841665	-0.00714910071681192	-1.56120883402055	0.123138687170701	0.999463745446798	-4.43415762375801
fdMOLku0h7lx3jrO5Q	LRRC1	leucine rich repeat containing 1	-0.0817121678229129	-0.0104213204725857	-1.56091795958317	0.123207314025899	0.999463745446798	-4.43451188743688
uYHTdeXkpVCtRXt6UQ	YIF1B	Yip1 interacting factor homolog B, membrane trafficking protein	0.0868467164958986	-0.00186126239889109	1.56086442406239	0.123219948143678	0.999463745446798	-4.43457708317411
3OBSaluV9DlVC4lSB8	CCDC124	coiled-coil domain containing 124	0.087155894851055	0.010744899691412	1.56076114838638	0.123244323613553	0.999463745446798	-4.43470284685041
WlAitRBSu5HvR5JU.k	POLR2D	RNA polymerase II subunit D	0.0452656242184201	0.0391503283719302	1.56049070961741	0.123308171711211	0.999463745446798	-4.43503213680321
ltdTh6khoC50ReeiKM	ASMT	acetylserotonin O-methyltransferase	-0.206672968063923	0.0461711492061342	-1.56043533095918	0.12332124935753	0.999463745446798	-4.43509956016637
cl6TfxQULAegje8esg	MZT1	mitotic spindle organizing protein 1	-0.0750364749307623	-0.0128100462801056	-1.56015869340694	0.12338659377484	0.999463745446798	-4.43543633278468
ZqrVKG5dMTh_J_0tR4	CTNS	cystinosin, lysosomal cystine transporter	-0.0707230538449606	0.0282729064534325	-1.55998395743229	0.123427882309956	0.999463745446798	-4.43564902441214
9pN1JHikXeHRLx86JE	RPS6KC1	ribosomal protein S6 kinase C1	0.0780906182810798	0.0118928543907539	1.55949716978653	0.123542963991111	0.999463745446798	-4.43624143555646
rtGiDc3DVHs8IqgFqU	MED18	mediator complex subunit 18	0.142535401311784	0.0144592886364966	1.55924264549656	0.123603170271857	0.999463745446798	-4.43655111922833
KjupQtR7XX6aQCVPgg	TAGLN	transgelin	-0.0959251903854294	-0.019961471976564	-1.55918573809119	0.123616634598677	0.999463745446798	-4.43662035301861
Bt8KIesoopOgFAKW7s	MEIS1	Meis homeobox 1	0.115631722088721	-0.0277537080299877	1.5589925124676	0.123662360632819	0.999463745446798	-4.43685541484781
x3PpTep9En4vBfn.Wo	ALOX5AP	arachidonate 5-lipoxygenase activating protein	0.0645657864472952	0.0123837465472918	1.55883698474766	0.123699175418724	0.999463745446798	-4.43704459722395
EphT4tct1fv7lXsorI	SUPT4H1	SPT4 homolog, DSIF elongation factor subunit	0.0697297214553189	0.0322699396412557	1.55854338948794	0.123768695846846	0.999463745446798	-4.43740167643331
liJbNdStUde9PlXyt0	PAPOLG	poly(A) polymerase gamma	-0.136993375891871	0.0224666777114076	-1.55832352601773	0.123820777733417	0.999463745446798	-4.43766904049584
i5G1vP0uH61bq3JfVU	COL7A1	collagen type VII alpha 1 chain	-0.136672855810463	0.00544186923095639	-1.55813896457365	0.123864510673221	0.999463745446798	-4.43789344898214
KTlCCOIWqimGcL5424	WDR4	WD repeat domain 4	0.104408536828594	0.025243446633314	1.55801931409993	0.123892869153153	0.999463745446798	-4.43803891912234
E6RDfp0eQXeXVq9CQ8	LGMN	legumain	0.157186474387926	0.032028299083598	1.55755824859408	0.124002195193943	0.999463745446798	-4.43859938331395
KSM9_nSper4qJ8qChs	CDIPT	CDP-diacylglycerol--inositol 3-phosphatidyltransferase	0.0843306573589507	0.0217390448224508	1.55740223152449	0.124039206769531	0.999463745446798	-4.43878900084812
6TtKgtn.rl6ev5UiUI	TK2	thymidine kinase 2, mitochondrial	0.129257888524541	0.0572111856429906	1.55699922738655	0.124134851306243	0.999463745446798	-4.43927871699845
ZgEpErjk9157590ud0	GHITM	growth hormone inducible transmembrane protein	-0.0553946138130052	-0.0325700689134844	-1.55686354947813	0.12416706482995	0.999463745446798	-4.43944356177524
BEglUSegdAkDzrdsiU	BROX	BRO1 domain and CAAX motif containing	-0.125519790072647	0.00698051583114862	-1.55659962825455	0.124229745806798	0.999463745446798	-4.43976418078516
ZeK54aEbbEZie6Hrqg	PKN1	protein kinase N1	0.109063693081556	0.0291581195638969	1.55615201350349	0.124336111470006	0.999463745446798	-4.44030784198221
QeWTjJAnYYf.sELrpc	SPAG6	sperm associated antigen 6	0.11294848665368	-0.0170847736663457	1.55554827691774	0.124479691028822	0.999463745446798	-4.44104089760307
fHE9Fg9QglqK9JLXpU	ALG14	ALG14, UDP-N-acetylglucosaminyltransferase subunit	-0.0848406988940079	0.0312344024857812	-1.5554573873044	0.124501317679502	0.999463745446798	-4.44115123298141
QVfd9fRTeRxP3p41Q0	OSBP	oxysterol binding protein	-0.0526074315434533	-0.000968625312377534	-1.55476766218566	0.124665531371347	0.999463745446798	-4.44198833162768
QOOmuiuuvsu46NV.K8	APOL3	apolipoprotein L3	0.0773175154243299	-0.0391873326924254	1.55435826843367	0.124763083806429	0.999463745446798	-4.44248503950542
xa80kFts14EKcYyl84	SS18	SS18, nBAF chromatin remodeling complex subunit	-0.113999463319975	-0.0533660285064233	-1.5541919575737	0.124802730585065	0.999463745446798	-4.44268678632424
uUT6W7634HXpdCQ1lw	SERPINB9	serpin family B member 9	-0.12877678696129	0.0330038060892242	-1.55401169017487	0.124845715799032	0.999463745446798	-4.44290544105173
HjjXHnVJBdxNSg4tXI	MAP4K1	mitogen-activated protein kinase kinase kinase kinase 1	0.0486762330510203	-0.0138970867065051	1.55356593230436	0.124952058553269	0.999463745446798	-4.44344602167213
TlR9ju_9_2R8qE0NCg	SETD9	SET domain containing 9	0.0748306154272564	0.0290150931375544	1.55331188772931	0.125012697288135	0.999463745446798	-4.44375404362776
EqOojHvutF3oAxPecc	IL1R2	interleukin 1 receptor type 2	-0.127584012969286	0.0734603575654504	-1.55308710981759	0.125066369820836	0.999463745446798	-4.44402654204823
BELB14lZupaRUUeVnk	RNF126P1	ring finger protein 126 pseudogene 1	0.147920664456277	-0.0352268457977283	1.55297774925743	0.12509248960607	0.999463745446798	-4.44415910685275
f7iK5v65JP3pOoEgek	FAM156A	family with sequence similarity 156 member A	-0.102162318681928	0.0296445722933557	-1.5526978173198	0.12515936863509	0.999463745446798	-4.44449839605041
iVu_fQHiEjqHwSkOq0	IRF4	interferon regulatory factor 4	-0.0640163448056219	0.0121443884312409	-1.5526696808225	0.125166092350468	0.999463745446798	-4.44453249555731
inm.CX1VNux5Ivieko	DDIT4	DNA damage inducible transcript 4	-0.0871962236196413	-0.0148994385032328	-1.55251027294849	0.125204191126009	0.999463745446798	-4.4447256762767
TwnfXlW9J9HVFf0m14	DCTN1	dynactin subunit 1	0.104158707978321	0.0398878726367273	1.55249942111547	0.125206785070003	0.999463745446798	-4.44473882656487
B10nshK1.2OsTP3_X8	CD69	CD69 molecule	-0.0831821913055313	-0.0332622447108392	-1.55111138348692	0.125538924772064	0.999463745446798	-4.4464201601524
Z016KIKJIUHKAgqInU	UBXN8	UBX domain protein 8	0.0997326574013621	0.00683377132602735	1.54984457315498	0.125842668572957	0.999463745446798	-4.44795344660335
0Cq3veS6IIT3rhSH.k	KDM5B	lysine demethylase 5B	-0.100080988101943	0.00981611868622138	-1.54952517469332	0.125919343228444	0.999463745446798	-4.44833984974753
f3r8rs7L6lO8ftSKCI	DIP2B	disco interacting protein 2 homolog B	-0.0480832546361845	-0.0215781384793715	-1.54940152520025	0.125949036458967	0.999463745446798	-4.44848941930405
iDpdN157X2JtWnsUOg	ACOT2	acyl-CoA thioesterase 2	0.0917642982129948	-0.00291914970762667	1.54927394184991	0.125979680211725	0.999463745446798	-4.44864373587385
xAB8SY6VRQpchGkel0	ST3GAL4	ST3 beta-galactoside alpha-2,3-sialyltransferase 4	0.127456985006759	-0.0174589490219907	1.5489974470367	0.126046110809196	0.999463745446798	-4.44897812610276
lQuPtIfip0yC7ysad0	PRPF4B	pre-mRNA processing factor 4B	-0.106223403418259	-0.0297217557480678	-1.54814816312705	0.126250334046421	0.999463745446798	-4.45000489961351
B3tUSUUXd10lJDhNJs	DZANK1	double zinc ribbon and ankyrin repeat domains 1	-0.091945799748071	0.00999462234805714	-1.5480405308204	0.126276234669116	0.999463745446798	-4.45013498881716
oeWU9eSTRTCS5Ku3U0	AP3M2	adaptor related protein complex 3 mu 2 subunit	0.0564234195250345	0.0280213740280417	1.54789797660387	0.126310545406368	0.999463745446798	-4.4503072734212
3ne7SraquSAtKEg4qM	GPS1	G protein pathway suppressor 1	-0.108577587625923	-0.0577396662025283	-1.54779825215208	0.126334552050416	0.999463745446798	-4.45042778724545
cigO0Sqc45CAl0gOHk	TRNT1	tRNA nucleotidyl transferase 1	0.130168346375818	-0.0101430356521326	1.54778943619931	0.126336674487399	0.999463745446798	-4.45043844070082
NtYFKp7Dpf3zHcgzEA	ISCA1P1	iron-sulfur cluster assembly 1 pseudogene 1	-0.0679876663279647	-0.00331212551498386	-1.54764020441761	0.126372606284188	0.999463745446798	-4.45061876830421
WlcVKodVL94fgsh4gg	MSL1	male specific lethal 1 homolog	-0.0927002646710359	0.00875418755911694	-1.54759867057616	0.126382608185045	0.999463745446798	-4.45066895382367
6dIvrulxenMTfTV1UU	DDRGK1	DDRGK domain containing 1	-0.0567072346155914	-0.0314668824328445	-1.54693475702599	0.126542572944442	0.999463745446798	-4.45147099562447
xl54HaKov6ID.ISSd4	UBE2H	ubiquitin conjugating enzyme E2 H	-0.100295854583409	-0.00426097916619666	-1.54594621634832	0.126781052614348	0.999463745446798	-4.45266461842933
Kl8KrKCABeHkDTtLss	PRPF39	pre-mRNA processing factor 39	0.12254083139565	-0.0644206654170036	1.54541214188498	0.126910043684623	0.999463745446798	-4.45330920029062
QqOEAk75n_TSQpPh94	EOGT	EGF domain specific O-linked N-acetylglucosamine transferase	-0.0780582716242241	0.0435917991939762	-1.54514388018244	0.126974874342699	0.999463745446798	-4.45363289191419
iZP5.H5DjzEKkh3d6o	MIR300	microRNA 300	-0.12109014349094	0.0257792927775286	-1.54500488128387	0.127008476491711	0.999463745446798	-4.45380059135091
ur3yTKK31TnCC11TlA	MIR2116	microRNA 2116	-0.147241763256906	-0.0106648130202695	-1.54458283194035	0.127110547738953	0.999463745446798	-4.45430970071038
congjqSuggiVdDLgjg	GTF2A1	general transcription factor IIA subunit 1	-0.112992717915436	-0.000462378721840295	-1.54372204678422	0.127318928060221	0.999463745446798	-4.45534765215336
9eAUiN7DTdz6XquXuc	TMEM43	transmembrane protein 43	-0.0607508964990482	-0.0084997670904474	-1.54363295197194	0.127340511790122	0.999463745446798	-4.45545505406895
EpIo5LopTSqX4wRIv0	RBM4	RNA binding motif protein 4	0.0698539868948156	0.0450923246096614	1.54362313485464	0.127342890221147	0.999463745446798	-4.45546688804853
3giUKCIB9JKYyQ5ElA	VPS37A	VPS37A, ESCRT-I subunit	0.0676242707829617	-0.0503306973071745	1.54358579760868	0.127351936383042	0.999463745446798	-4.45551189535529
N6h32CEUN7mc9GcBm0	HIST1H3C	histone cluster 1 H3 family member c	0.0944853717999243	0.0757485560546629	1.54351689307879	0.127368632087828	0.999463745446798	-4.45559495207908
ua6oIQoq.iTpIKARXg	ACYP1	acylphosphatase 1	0.0843500299658189	0.0249905184281255	1.54335527542422	0.127407799197307	0.999463745446798	-4.4557897507749
xu3n8ix_RpCpNPRKhc	PDPK1	3-phosphoinositide dependent protein kinase 1	-0.0792307217969462	-0.0216305713493271	-1.54214772615079	0.127700745049327	0.999463745446798	-4.45724462413399
WSntNQgebC77nSzVCo	MTCP1	mature T-cell proliferation 1	-0.0519082906764114	0.0555042593865452	-1.54209526460683	0.127713484105098	0.999463745446798	-4.45730780688213
rUroYBTfXnot8T4uRQ	POLR3C	RNA polymerase III subunit C	0.0477315803312157	0.00955771957248457	1.54208732931863	0.127715411091733	0.999463745446798	-4.45731736367863
3W.fA7xS1SUN8a4TxI	SEPT3	septin 3	-0.108344533278247	-0.0786897414015033	-1.54197265412768	0.127743261125066	0.999463745446798	-4.4574554667225
6.PHwKxYKClK5Lp0ZU	TDRD1	tudor domain containing 1	-0.156962596996855	0.000870475581906967	-1.54181724670556	0.127781011099197	0.999463745446798	-4.45764260843852
ui4eB8ge_oO9SO3EVI	SPAG16	sperm associated antigen 16	-0.0615017781079075	-0.0174393127478356	-1.54178335169804	0.127789245704162	0.999463745446798	-4.45768342252708
3V0_El0Xi0X1C_9Tqc	EIF6	eukaryotic translation initiation factor 6	0.0492011885428495	0.0500913485380443	1.54174039257641	0.12779968299181	0.999463745446798	-4.45773514982828
WilWqieil2gill2egk	DUX4L5	double homeobox 4 like 5	-0.177964468950455	0.0237267838440162	-1.54164594381765	0.127822632512115	0.999463745446798	-4.45784887141462
Tq_AVU76Up63QHXhdI	LOC100288254	uncharacterized LOC100288254	0.173953041201649	-0.0399116490059772	1.54153605152346	0.127849338685193	0.999463745446798	-4.45798117982816
lks1Li4IEfh4d_pRd4	PROSER1	proline and serine rich 1	0.0578450700013183	-0.0139558499880045	1.5415154525783	0.127854345162171	0.999463745446798	-4.4580059796364
9Jf90CV.S8QUVRzoNI	ANAPC13	anaphase promoting complex subunit 13	0.053028506335651	0.0169241653029729	1.5408480460576	0.128016639531351	0.999463745446798	-4.45880932958476
6ep6Huo3jxIa4TBEoI	EEF1AKMT1	EEF1A lysine methyltransferase 1	0.065037207356923	0.00337975228451982	1.54033632736474	0.12814118590258	0.999463745446798	-4.45942506338481
EY5Aik4E4u4F45SZSU	KAT6B	lysine acetyltransferase 6B	-0.110230530778323	-0.052780417294725	-1.53990619820192	0.128245948810232	0.999463745446798	-4.45994247795045
fXHKjeF0Lv94lSn164	XPO4	exportin 4	-0.049527728508917	-0.000770987937387142	-1.53966274867543	0.128305273901972	0.999463745446798	-4.46023527146559
utF.p30iOSoRGOp968	VHL	von Hippel-Lindau tumor suppressor	-0.0892144694480719	0.0100989839199117	-1.53935973909623	0.128379143369208	0.999463745446798	-4.46059963766578
Bqn4ye61XdV3hxcA0M	PFKFB3	6-phosphofructo-2-kinase/fructose-2,6-biphosphatase 3	-0.101217561288623	-0.0663117336442908	-1.53934489626078	0.128382762711469	0.999463745446798	-4.46061748434484
rkQGsv_7vp51Htd5SU	RPS27	ribosomal protein S27	0.0702832864395354	-0.00111122796791686	1.53924527626489	0.128407056587627	0.999463745446798	-4.46073726101291
rroK4jCnr9u7_6oqk4	KSR2	kinase suppressor of ras 2	-0.143797712940829	0.0333432628384533	-1.53903104653889	0.128459312192193	0.999463745446798	-4.46099481291866
EUlcJSV53lwux1IIB0	PHYKPL	5-phosphohydroxy-L-lysine phospho-lyase	0.0743867406338288	-0.0165791187972666	1.53864052013564	0.128554614123494	0.999463745446798	-4.46146422801341
TxUSCigugqEokTKyOU	MTR	5-methyltetrahydrofolate-homocysteine methyltransferase	-0.0746884200549887	0.021977502203007	-1.53855300144286	0.128575979410363	0.999463745446798	-4.46156941099969
0BFePaXjoiCCkzvYek	RPL23AP42	ribosomal protein L23a pseudogene 42	0.0585395631149494	0.0180383817352212	1.53829854718449	0.128638113458393	0.999463745446798	-4.4618751916899
ljsJFJPX17NX.ulSXU	C11orf74	chromosome 11 open reading frame 74	0.0853119318082007	-0.00329605015346439	1.53825630393303	0.128648430957507	0.999463745446798	-4.46192595140742
ohS5Ax.iJF6txKEw_k	TMEM64	transmembrane protein 64	0.0623034235912463	-0.031890224811303	1.53767275384871	0.128791024607194	0.999463745446798	-4.46262701728154
opErJ0vz_f3FeXpR_c	SPATA18	spermatogenesis associated 18	0.103650459769521	0.0692388886183245	1.53642702672333	0.129095844874547	0.999463745446798	-4.46412279217595
0ECqTqXUl.lRC5dLlQ	SH3BP1	SH3 domain binding protein 1	-0.0712029744353084	0.00271259611715336	-1.53626200317107	0.129136267862747	0.999463745446798	-4.46432085641858
foXp7QXX75VR75fiD4	C1orf50	chromosome 1 open reading frame 50	0.0572778185761963	0.00676729226445234	1.5358917471206	0.129226999708113	0.999463745446798	-4.46476517326766
Tq9AOOgpYIkKfM66yo	MED1	mediator complex subunit 1	-0.0821893900902819	-0.00576112907286958	-1.53482632587487	0.129488365313905	0.999463745446798	-4.46604315727408
WhKIH.9TObkx3ew9S4	ATXN1	ataxin 1	-0.0806599754375042	-0.0489624542916708	-1.53429555137645	0.129618729663185	0.999463745446798	-4.46667952271701
Bp4v0_fAOdd78iqXrI	ZNF174	zinc finger protein 174	-0.0681809749338409	-0.00385234617491179	-1.53425258989718	0.12962928605451	0.999463745446798	-4.46673102199516
Byv_6TUa0rsignlX5I	DCAF7	DDB1 and CUL4 associated factor 7	-0.0445612810106169	0.0148822912798918	-1.53420526942085	0.129640914317856	0.999463745446798	-4.46678774500643
Wa913l8AEuVBLgeVdY	RHBDL3	rhomboid like 3	-0.108113795559744	-0.0113166888905372	-1.53393330816926	0.129707760574578	0.999463745446798	-4.46711371352955
6AA4.elqbrp0Jew1SQ	XPNPEP3	X-prolyl aminopeptidase 3	-0.122148165440803	-0.0425270487970681	-1.53376703046119	0.129748643997066	0.999463745446798	-4.46731298523723
KQA6gFL05KSCS_uu3o	NSD3	nuclear receptor binding SET domain protein 3	-0.104566953992858	-0.0240243270844532	-1.53370769949119	0.129763234435862	0.999463745446798	-4.46738408427171
rK1F57uVt1157lVF10	KRTAP10-11	keratin associated protein 10-11	0.125412704098035	0.0278827024673604	1.53361977439837	0.129784859023524	0.999463745446798	-4.46748944431153
T.OKlGre72HSXSoYd4	BSG	basigin (Ok blood group)	0.0680133870047206	-7.51572300528832e-05	1.53357333604675	0.129796281379147	0.999463745446798	-4.46754508883138
oo7qL.wOcyV6n5VP6o	VASP	vasodilator stimulated phosphoprotein	0.109453836583229	-0.0433505933187631	1.53343610620013	0.129830040213471	0.999463745446798	-4.46770951474985
iFuuBX6qivclAnpEgg	NIT2	nitrilase family member 2	0.0589751290709307	0.00902920248998761	1.53329365618405	0.129865090590823	0.999463745446798	-4.46788018105898
0VJlKWSCBIIXSg07IE	COX14	COX14, cytochrome c oxidase assembly factor	0.063821689200914	0.00401207204273311	1.53284172246975	0.129976340333263	0.999463745446798	-4.46842153668324
urqCpejScPSIefQ0kg	MTRF1	mitochondrial translation release factor 1	0.0642945330469829	-0.00504052128793346	1.53265664358536	0.130021921883913	0.999463745446798	-4.46864319387921
E5JUac65fXh3SzXYWM	PSMB2	proteasome subunit beta 2	0.0506085764858042	-0.000794292283984505	1.53239056862654	0.130087473511927	0.999463745446798	-4.4689618118042
KVb81O7U_GlNzvn32k	RNF213	ring finger protein 213	0.0661498822101303	-0.00917886190801909	1.53221395952303	0.130130998337021	0.999463745446798	-4.46917326858686
cZTmn.pM5.o8_tQqks	PANK2	pantothenate kinase 2	0.0655816199467915	0.0320384841308367	1.53170314313313	0.130256952661205	0.999463745446798	-4.46978475074369
Wy.n.x1I0gxeo_TNAk	RPSA	ribosomal protein SA	-0.141675894134162	-0.0219055619519802	-1.53147734740211	0.130312658957131	0.999463745446798	-4.47005498393442
ixRdX.VCkTYF4vJKCo	CCZ1B	CCZ1 homolog B, vacuolar protein trafficking and biogenesis associated	0.0754630180469483	0.0208207906466716	1.531284053642	0.130360361670512	0.999463745446798	-4.47028628954351
uoihOqCoUuzS_bojHI	PPP2R1B	protein phosphatase 2 scaffold subunit Abeta	0.0904802140121305	-0.0142389247442393	1.53099986378589	0.13043052166405	0.999463745446798	-4.47062631751675
ZqbssL7IKdiqG6Hz_U	NET1	neuroepithelial cell transforming 1	-0.0508114371165825	0.0148032881939866	-1.53066685679347	0.130512771600429	0.999463745446798	-4.47102468046628
lmR0q3iknLJaKtFOC8	RPL26L1	ribosomal protein L26 like 1	0.0701978297677868	0.0175762295909054	1.52952453099897	0.130795229117777	0.999463745446798	-4.4723905936407
65m0l6Bqfj55Xwe73g	DDX31	DEAD-box helicase 31	0.063373267919391	0.0116560734945483	1.52951040676192	0.130798724582565	0.999463745446798	-4.47240747654513
NjgSOEBN4BVdZHvFS4	TBC1D4	TBC1 domain family member 4	-0.0799149819492725	0.0124586628297732	-1.52942258018561	0.130820461557265	0.999463745446798	-4.4725124537022
Ne73XpnXVcLz572Vns	TAOK2	TAO kinase 2	-0.0911139055238366	-0.0171784561165347	-1.52910120295345	0.13090002646286	0.999463745446798	-4.4728965415173
N6FLu6IV5IJIUq_kKc	ZGPAT	zinc finger CCCH-type and G-patch domain containing	0.137392361148605	0.0168962499268958	1.52900547712849	0.130923733179788	0.999463745446798	-4.47301093204707
Hrgvi4ii_KBughLid0	MGA	MGA, MAX dimerization protein	-0.0781879601302141	-0.00728464112270106	-1.52890450959364	0.130948741706484	0.999463745446798	-4.47313157918309
EhSABCutGFUl9O5iGk	C21orf33	chromosome 21 open reading frame 33	0.0759928969206611	-0.0112043708211113	1.52856377799576	0.13103316506072	0.999463745446798	-4.47353866875499
EUeqRErh.ddQXU0tUo	SYNE3	spectrin repeat containing nuclear envelope family member 3	-0.0972080063334744	0.0431943103988997	-1.5284779682638	0.131054433010099	0.999463745446798	-4.47364117690312
9XqVQCJySDWQH.Q3dw	RPS6	ribosomal protein S6	0.0429392550572889	0.00314778053074933	1.52799066533205	0.131175262983377	0.999463745446798	-4.47422320771698
Be1Z5u.1342oHXn3X4	MT1X	metallothionein 1X	0.130549359890475	0.0909184061004451	1.52789636633661	0.131198655234812	0.999463745446798	-4.47433581798846
Z_5NCdNll69uVhNXS0	ANO9	anoctamin 9	-0.0901104614342681	-0.0358081549315381	-1.52763608861574	0.13126323810611	0.999463745446798	-4.47464660408608
HcyOLSdRH4t3.yKgNI	FAM103A1	family with sequence similarity 103 member A1	0.0560924972533958	-0.0339691310877443	1.52729264010223	0.131348496755468	0.999463745446798	-4.47505662621307
TwlKEILkDl3_CQ9Kco	NHLRC3	NHL repeat containing 3	0.0534788078172397	-0.00989548325558724	1.52687128628302	0.131453154785889	0.999463745446798	-4.47555953887114
EYR7oeBEeCd46gBeuE	ABHD5	abhydrolase domain containing 5	-0.0626287047668035	0.0104233552228334	-1.52669872057373	0.131496036614844	0.999463745446798	-4.47576547020848
E16U4oQA8eLpXwIqC8	MYADM	myeloid associated differentiation marker	-0.136535141186985	-0.0956204237167139	-1.52665629320782	0.131506581328454	0.999463745446798	-4.47581609763829
Q1QkESFHfVflXVUioc	ARFGAP2	ADP ribosylation factor GTPase activating protein 2	0.0656785163846819	-0.000404169821121169	1.52661173583573	0.13151765614591	0.999463745446798	-4.47586926535356
9ndUbcRU0XUl4qZB4g	NDUFAF3	NADH:ubiquinone oxidoreductase complex assembly factor 3	0.138660534728488	-0.0665743040375358	1.52660205967371	0.131520061271593	0.999463745446798	-4.47588081116511
ZT0L1VKQ5oSIsF2iUI	MRPL46	mitochondrial ribosomal protein L46	0.0520738786495836	0.0129530400327773	1.52636889641834	0.131578027323833	0.999463745446798	-4.4761590063872
3KgniZe6VzxzUvpd1Q	PRPSAP1	phosphoribosyl pyrophosphate synthetase associated protein 1	-0.0616836147512804	0.018535153717505	-1.52627889343923	0.131600408122355	0.999463745446798	-4.47626638162773
9np0dNbUorq3Tr9P_c	N4BP3	NEDD4 binding protein 3	0.174257767773024	0.0318925734215337	1.52610236388109	0.131644314012343	0.999463745446798	-4.47647696778251
cnXqKSRSAqR4Dscno4	SNRNP200	small nuclear ribonucleoprotein U5 subunit 200	0.0820277536329224	-0.026189233061143	1.52601534193853	0.131665962113322	0.999463745446798	-4.476580770006
6Pkqj69SRXcDUSOULU	ZNF823	zinc finger protein 823	-0.0764856563414929	-0.0112396315935439	-1.52591265001967	0.131691511999671	0.999463745446798	-4.47670325681394
ifLKBjiRDl6HVRWle8	MTHFD1	methylenetetrahydrofolate dehydrogenase, cyclohydrolase and formyltetrahydrofolate synthetase 1	0.0776045965957743	0.00113884745945592	1.5255808140522	0.131774100086562	0.999463745446798	-4.47709900562196
0u0e_vooQupHiFeuFQ	RHBDD3	rhomboid domain containing 3	0.0905431395213861	0.0376322066005842	1.52510743177446	0.131891987552499	0.999463745446798	-4.47766342602816
0vilH61PJ6pJCNHHQY	HMGB3	high mobility group box 3	0.0915485093492341	0.0205302661328242	1.52488581415875	0.131947206195001	0.999463745446798	-4.47792760847095
WRSCySIJKqUicQSz30	MTMR11	myotubularin related protein 11	-0.14316497884629	0.0146167743912851	-1.52450566496705	0.132041967493711	0.999463745446798	-4.47838068847836
3Siu6oKKqP27v5OLuY	RETREG3	reticulophagy regulator family member 3	-0.115299237743553	0.0136269209436605	-1.52442653835483	0.132061698474425	0.999463745446798	-4.47847498229433
Wkk61eXylxeOgsCXQU	GSTM1	glutathione S-transferase mu 1	0.0435828361737128	0.00404928282142207	1.52349837350645	0.132293319685252	0.999463745446798	-4.47958072405441
ZqygilO.S9v93sq2Pg	GCNT1	glucosaminyl (N-acetyl) transferase 1, core 2	-0.0792574736365155	-0.101997779533086	-1.52346787980619	0.132300934766157	0.999463745446798	-4.47961704130882
36l80R6MOHuC54UR0U	PIPSL	PIP5K1A and PSMD4-like, pseudogene	0.0779173280923467	0.0121154848263303	1.52341410960345	0.132314363449051	0.999463745446798	-4.47968107868114
00oqlCBSqlNAJNqP6Q	MAST2	microtubule associated serine/threonine kinase 2	0.130448470560856	-0.0230011793656382	1.52334233022395	0.132332291463479	0.999463745446798	-4.4797665607571
KqKjqfNQUty86K15yU	HNRNPH2	heterogeneous nuclear ribonucleoprotein H2	0.0747918791604508	0.00161353487496775	1.52300073119686	0.132417637484261	0.999463745446798	-4.48017332030706
oiUpRFtdJLtO7wAZQk	ALG2	ALG2, alpha-1,3/1,6-mannosyltransferase	-0.109183444455949	-0.0872666426135207	-1.52279356165325	0.132469418507512	0.999463745446798	-4.48041996685463
x_peKJ5e_6lJ59h558	TEX10	testis expressed 10	0.054552772087844	0.0427017683096446	1.52261265116999	0.13251464931715	0.999463745446798	-4.48063532531503
KTRdHVIgL60ndUnR0k	LRRC8D	leucine rich repeat containing 8 VRAC subunit D	0.0787400344867557	0.0483944793682445	1.52224577762233	0.132606411709594	0.999463745446798	-4.48107198460564
9m6I6RNfnnqh_lec.M	POLR3D	RNA polymerase III subunit D	-0.102330873352386	-0.0184105328045297	-1.52212010034324	0.132637857669106	0.999463745446798	-4.48122154562404
fLW.IiQFM_5d9N_FSk	ASXL2	additional sex combs like 2, transcriptional regulator	-0.0889562342679804	-0.00661707017207419	-1.52194970291098	0.132680502573568	0.999463745446798	-4.48142430727359
oTJA6SXYFPlS1Xxe6k	SNORA80E	small nucleolar RNA, H/ACA box 80E	0.104084582184151	0.0258320533779091	1.5211906963029	0.132870588963302	0.999463745446798	-4.48232722102445
uo5XRPrn910105Vf5Q	NLRX1	NLR family member X1	0.0601037897887459	0.0390717102929141	1.52089544021773	0.132944591404058	0.999463745446798	-4.48267834546412
WgChTgvkdP.XoXS3N0	DTWD1	DTW domain containing 1	0.0744275635107501	0.0229216311324674	1.52076760530955	0.132976641826665	0.999463745446798	-4.48283034983092
K60gHUIfJIkS41YLiI	ARMCX5	armadillo repeat containing, X-linked 5	0.071071586673082	0.012654302564779	1.5206738248606	0.133000158095467	0.999463745446798	-4.48294185365976
0uNJKi.P4oTS0X_q_U	EML4	echinoderm microtubule associated protein like 4	-0.0700848751937771	-0.00632475756956878	-1.52020415908893	0.133117980418279	0.999463745446798	-4.48350018539892
lNIg5YutevgrAlIp7k	UBR1	ubiquitin protein ligase E3 component n-recognin 1	-0.07264903115421	-0.00947004145557367	-1.51914283504068	0.133384532805503	0.999463745446798	-4.48476128699264
6X6y5U2kDZDpJO4uhQ	ENOX2	ecto-NOX disulfide-thiol exchanger 2	-0.0888163954667069	-0.00856658587780644	-1.51911471118757	0.133391601872387	0.999463745446798	-4.48479469369065
Ekol9fEfZTi.XjYdSQ	GPR89B	G protein-coupled receptor 89B	-0.0733023942987651	-0.0505181665668037	-1.51898052111707	0.133425335278351	0.999463745446798	-4.48495408247206
x.VE8.t1OMUdCS7noU	MTRR	5-methyltetrahydrofolate-homocysteine methyltransferase reductase	-0.0631676227896375	-0.000442838119023354	-1.51751294098621	0.133794703936892	0.999463745446798	-4.48669640406067
3TFp6UagmOMHmaT3_I	WDR1	WD repeat domain 1	0.0875443168147382	0.0142125622778188	1.51750522398971	0.133796648328212	0.999463745446798	-4.48670556163529
f9SXlLTg3SEl5Rc_V4	ZNF586	zinc finger protein 586	0.0475240966348018	0.0217222410693721	1.51709946880556	0.133898914772221	0.999463745446798	-4.48718700117437
TA8nq7jpR_op4jKINk	PDE7A	phosphodiesterase 7A	-0.136979371310894	-0.0859755314486043	-1.51691164823076	0.133946273949962	0.999463745446798	-4.48740981524334
fftCuCoRC_UlFB.fl0	CCL23	C-C motif chemokine ligand 23	0.165385240962966	-0.0196148681132097	1.51682954470995	0.133966980608805	0.999463745446798	-4.4875072077724
cGUnqbSFUWqQX5IoYU	SPI1	Spi-1 proto-oncogene	0.0639804130140599	-0.0149928731258214	1.51672905676336	0.133992327298151	0.999463745446798	-4.48762640159903
fTS1QQjpcgNk90XZfk	MTMR11	myotubularin related protein 11	0.111546148814902	0.0269910965051764	1.51631995718396	0.134095556130431	0.999463745446798	-4.48811158019578
rwsKSiJ4fqHXp2lUEo	RNF185	ring finger protein 185	-0.0996953037197165	0.00244299909389199	-1.51627746827465	0.134106281036578	0.999463745446798	-4.4881619637303
0KI6VQQkVZ.5JIoni8	ACTN4	actinin alpha 4	-0.0716334500796226	0.0180012782704133	-1.51590318010835	0.134200786885798	0.999463745446798	-4.48860574009941
TlzuclRAgz7dPJeDuU	PTGS2	prostaglandin-endoperoxide synthase 2	-0.216167059567399	-0.0383587617384461	-1.51560796832439	0.134275363485435	0.999463745446798	-4.48895568803976
KlB6fjr0PLCcP3VEVk	VASH2	vasohibin 2	-0.105472718678571	0.00789608035886713	-1.51527427197962	0.134359701520942	0.999463745446798	-4.48935118050394
Qv9W.zupDDtA7nOSUo	CHD1	chromodomain helicase DNA binding protein 1	-0.0546940949467612	-0.040394579470527	-1.5142266058271	0.134624759584133	0.999463745446798	-4.4905923392233
fqa6oIEJMOsqop_l4A	PRELID3B	PRELI domain containing 3B	-0.213574416191914	-0.0165562685371876	-1.51414861028074	0.134644508862469	0.999463745446798	-4.49068470807552
oUtFATk2m7TCNTRJ5A	BRIX1	BRX1, biogenesis of ribosomes	-0.0680255187655926	-0.00355058967706943	-1.5141238380503	0.134650781926241	0.999463745446798	-4.49071404450653
QkTArUpkrAvnogm7rk	CMSS1	cms1 ribosomal small subunit homolog (yeast)	0.0649330405463424	0.0154789337687721	1.51340962589485	0.134831740971354	0.999463745446798	-4.49155965772741
fUiK5lM.dN4P0eXpSE	PTPN13	protein tyrosine phosphatase, non-receptor type 13	-0.129785071560093	-0.00346478861921449	-1.51325539982113	0.134870842254349	0.999463745446798	-4.49174221012966
x4oS9Ioo9IYu2ebi6U	LTBP3	latent transforming growth factor beta binding protein 3	0.0925523361737863	0.0321172079760593	1.51303519516703	0.134926686762166	0.999463745446798	-4.49200282953203
c.s.wi3TncW_gclI6U	COMMD2	COMM domain containing 2	-0.0456094412569476	0.0271866335792212	-1.51290568814276	0.134959538631023	0.999463745446798	-4.49215608900859
ZlMGq96krSHfSQhLs8	SENP5	SUMO1/sentrin specific peptidase 5	-0.06953114303762	0.0176009910753327	-1.51283697511795	0.134976971535224	0.999463745446798	-4.49223739955316
HlB_pz_giwCFEdRLqc	SNORA4	small nucleolar RNA, H/ACA box 4	0.132168198610705	0.00190615090058878	1.5123706454274	0.135095329167056	0.999463745446798	-4.4927891340145
EjUqOiOoK8gKSV0XeI	PLCG1	phospholipase C gamma 1	-0.0900236788720093	-0.0048592578344697	-1.51168477570424	0.135269556486021	0.999463745446798	-4.49360033085123
94ggSIWIXlV8UJlHk4	USP35	ubiquitin specific peptidase 35	0.105229131475379	-0.0114220482826656	1.51156357873256	0.135300361858334	0.999463745446798	-4.49374363856811
ZStuSAH4h6r0qfuqt4	IL3RA	interleukin 3 receptor subunit alpha	-0.0905300880176443	-0.0127472784113384	-1.51153585838347	0.135307408486753	0.999463745446798	-4.49377641463161
B6ugFxXupFTtYlV6T8	TXNRD2	thioredoxin reductase 2	0.0691746649998953	0.0102106451097024	1.51149821217169	0.135316978774986	0.999463745446798	-4.49382092597741
fvorTwbx_xDntHu4TU	SLC39A10	solute carrier family 39 member 10	0.0932853538551991	0.00227642043400531	1.5111360953708	0.135409062145743	0.999463745446798	-4.49424902594709
udZ59RcGSXXl1l.v0w	F8A1	coagulation factor VIII associated 1	0.0884381110477101	0.0308440757909995	1.51086445730982	0.135478169982909	0.999463745446798	-4.49457009853496
QuR4kOirriolOeeD3o	TGIF2	TGFB induced factor homeobox 2	-0.0612511217550875	-0.00871028097039206	-1.51038790102119	0.13559947865466	0.999463745446798	-4.49513325323961
lh0gF1IoN7_fXjyNS0	EXT2	exostosin glycosyltransferase 2	0.0794261636080764	0.00902074854760711	1.5101360491356	0.135663622852634	0.999463745446798	-4.49543080478972
KpAdICHuMKdlIjl5Eo	STN1	STN1, CST complex subunit	-0.137557369971814	-0.0505685771472097	-1.51010244258173	0.135672183922665	0.999463745446798	-4.4954705059469
HqWpnv0nZ91VRdd3XQ	MIR1224	microRNA 1224	-0.122932855043423	-0.00873832893695921	-1.50957788744173	0.135805866524071	0.999463745446798	-4.49609008447377
xSb5.SNEfzURKAlLSU	BAG5	BCL2 associated athanogene 5	0.0979528593415818	0.0330040277408928	1.50934984317727	0.135864015904781	0.999463745446798	-4.49635937718413
BvelINAj0lcQozv9e4	CLEC2D	C-type lectin domain family 2 member D	-0.0934174227957019	-0.0384458405593437	-1.50901526464328	0.135949366203149	0.999463745446798	-4.49675440612554
fe3.VIREuq_Kicp7.k	NANP	N-acetylneuraminic acid phosphatase	-0.112913669038771	-0.000332859664656248	-1.50890601617696	0.135977244426864	0.999463745446798	-4.49688337571825
B5OqsVQ3gtLA4HDcQk	RPL7	ribosomal protein L7	-0.0926844396603764	-0.033636811521228	-1.50868220131806	0.136034372003639	0.999463745446798	-4.49714756592598
uhTUU0V.1X_v_Cl_Vw	TSPYL4	TSPY like 4	-0.112061781176084	-0.0128464318858051	-1.50856125937391	0.136065249687595	0.999463745446798	-4.4972903103034
NhKvV0ectJ9.6AehKU	WDR48	WD repeat domain 48	0.0765954598277961	0.0314295500073665	1.50807444499166	0.136189594200257	0.999463745446798	-4.49786477695823
3eq4qEnx1P4Uj7_nBE	STAMBP	STAM binding protein	0.0530861119067932	0.0259046429642334	1.50733566423552	0.136378468483839	0.999463745446798	-4.49873625073346
Ku.kHqiEgHuvjJS0eU	MYB	MYB proto-oncogene, transcription factor	-0.0703426761856501	0.00733343128504861	-1.50716485224256	0.136422167125515	0.999463745446798	-4.49893768638019
c.76K67BS5KH7kIIDU	PARG	poly(ADP-ribose) glycohydrolase	-0.0818659361870823	-0.0198374743798022	-1.50688608364801	0.136493507910649	0.999463745446798	-4.49926638819262
rr5wo6ngnqt6F9DQJc	PTTG1	pituitary tumor-transforming 1	0.0498163786831821	0.0434087208278707	1.50684609830106	0.136503743133819	0.999463745446798	-4.49931353114513
cC_9Xpaib_f2XsNUEc	TPM4	tropomyosin 4	-0.106690784802442	0.0256361753837587	-1.50670509128567	0.136539842145664	0.999463745446798	-4.49947977001746
Tld5ZCAS7iceUZ4AcU	MRPS7	mitochondrial ribosomal protein S7	0.0480296669592382	-0.0273807313070844	1.50661281665711	0.136563469322849	0.999463745446798	-4.49958854854477
KhJXu_50odHeeeugHQ	KDSR	3-ketodihydrosphingosine reductase	-0.0605852027924552	0.000852242602612444	-1.50612690313462	0.136687942058836	0.999463745446798	-4.50016126943044
iC30SkeTavt6ZX.XUk	SCARB1	scavenger receptor class B member 1	-0.0605544938655881	0.0176100364454516	-1.5055854757972	0.136826740736771	0.999463745446798	-4.5007992209182
QO1_oo2QJLeuJ6IlGQ	CEP68	centrosomal protein 68	0.144288701402995	0.00345739709595175	1.50527597179737	0.136906134169581	0.999463745446798	-4.50116380742203
3SE1cen2eunTdgTUZQ	SLC27A1	solute carrier family 27 member 1	0.11180684878424	0.0171979767469401	1.50523892626064	0.136915639460944	0.999463745446798	-4.50120744133091
BILE263R9VQSqKkCik	TAF6	TATA-box binding protein associated factor 6	0.139731544045575	0.00954888123925083	1.50498581578394	0.136980597482075	0.999463745446798	-4.50150553980536
3QkTjLqY4K0KKHRKVU	LRRC75B	leucine rich repeat containing 75B	-0.152970747250938	0.0452148368988678	-1.50486761582634	0.137010940525419	0.999463745446798	-4.50164473285616
HugJshCiOSs_uLaNkk	BCL2L1	BCL2 like 1	-0.104406851495618	-0.0063666791460535	-1.50465269944497	0.137066125166509	0.999463745446798	-4.50189779397791
6ut9ioyRiut4ShwR8U	TIMM23	translocase of inner mitochondrial membrane 23	0.0504615352018914	0.0423049491552463	1.50415104942033	0.137195003356699	0.999463745446798	-4.50248835038125
B.oKkK5ijn4pSi.hEk	ASL	argininosuccinate lyase	0.0760509615837369	0.00147580775103561	1.50373440019426	0.137302116729698	0.999463745446798	-4.50297870342397
xgVbO4LtQcXf1I_Srg	MCAT	malonyl-CoA-acyl carrier protein transacylase	0.0801155765192286	0.029153406303757	1.50372219258064	0.13730525609176	0.999463745446798	-4.50299306863344
fgfiHnkelvui1HRX2I	HERC2P2	hect domain and RLD 2 pseudogene 2	0.143977484316364	0.0564030706035589	1.50365971767346	0.137321323291646	0.999463745446798	-4.50306658378586
cFcSl0vX5IriqyItJc	MGLL	monoglyceride lipase	0.0688633294778597	-0.0582799918039974	1.50349513114586	0.137363658496105	0.999463745446798	-4.5032602417155
copX1QruuHuXx7E52g	MSRB1	methionine sulfoxide reductase B1	-0.0573383191554079	-0.0182217541713473	-1.50335616280372	0.137399412161709	0.999463745446798	-4.50342374122201
EVSp6JRCjFdH_TiieA	TBC1D9B	TBC1 domain family member 9B	-0.0727832313154704	0.023026060064768	-1.50306253957722	0.137474979439453	0.999463745446798	-4.50376914998279
TJo86PHOIUElLnUJWg	CCL14	C-C motif chemokine ligand 14	0.112227157518671	-0.0806613429072589	1.50289634113232	0.137517767017605	0.999463745446798	-4.50396463281938
oTl3uX2dOe.fWHoOX0	PNKD	paroxysmal nonkinesigenic dyskinesia	-0.0734323775468008	-0.0670807156851765	-1.50212891832338	0.1377154751988	0.999463745446798	-4.50486701799324
Qu7V3q1dQB3rS9CjlU	CCL25	C-C motif chemokine ligand 25	0.103196741968594	-0.0106280224140381	1.50075836802316	0.138069121992244	0.999463745446798	-4.50647754169281
o5RKSV6hMoJ6iQoCrc	RPL13A	ribosomal protein L13a	0.0456980083786148	0.0485741297346287	1.50017515326626	0.138219827315853	0.999463745446798	-4.50716246177631
ZUd3oKIeKp.sATy0vk	LAMP3	lysosomal associated membrane protein 3	0.0693435076642145	0.0114718818522296	1.50001596998508	0.13826098349686	0.999463745446798	-4.50734936195576
uaH_Fq_ig4EaKL1iFI	B4GALNT4	beta-1,4-N-acetyl-galactosaminyltransferase 4	0.123205038517748	-0.0203424435675681	1.4996825580368	0.138347217064744	0.999463745446798	-4.5077407680955
cpN.QldnevdKkk.1KY	LSM4	LSM4 homolog, U6 small nuclear RNA and mRNA degradation associated	0.0654793811633294	0.0375951557244683	1.49966673384555	0.138351310881698	0.999463745446798	-4.50775934277575
c9rEaGGWHdU0UJ5Xa8	C17orf97	chromosome 17 open reading frame 97	-0.175249880121642	-0.00691035928225829	-1.49910515637434	0.138496656263426	0.999463745446798	-4.50841841400694
HxN6t3O695J31.v0Io	TMPRSS3	transmembrane protease, serine 3	0.142782094182382	-0.00440353798685146	1.4984012536459	0.138679007537895	0.999463745446798	-4.50924419748563
xrR.n54VfXTL7_nPn0	CCL28	C-C motif chemokine ligand 28	-0.12215850872513	-0.00660812693008331	-1.498238594049	0.138721172604866	0.999463745446798	-4.50943497068639
rLntXgkn3v1pooIQ6o	ARHGEF1	Rho guanine nucleotide exchange factor 1	0.0806338652226106	0.0200499861498768	1.49819572784091	0.138732286181447	0.999463745446798	-4.50948524258136
BSm4lFuXpSDK..f0H4	SS18	SS18, nBAF chromatin remodeling complex subunit	0.169153567052652	0.034624704677575	1.49754672776151	0.138900632876561	0.999463745446798	-4.51024620357038
ZeR5ueuGDUT03Q6CjU	GADD45A	growth arrest and DNA damage inducible alpha	0.0901571072529646	0.0344827840954528	1.4975164913641	0.138908479934435	0.999463745446798	-4.51028164871966
KG66eqLl6Oua6_O8Fw	TMEM79	transmembrane protein 79	0.0622082749887613	-0.0149528998942035	1.49740928249343	0.138936305976165	0.999463745446798	-4.51040732088365
Evf.7VQfeU39QXeKTk	NETO1	neuropilin and tolloid like 1	0.126462439327947	0.0203003516732137	1.49733158358987	0.138956475454119	0.999463745446798	-4.51049839574466
0vSeVXLh1u7gixr_J4	PMS2	PMS1 homolog 2, mismatch repair system component	-0.127834411170165	0.0449537091417164	-1.49720808403657	0.138988538842057	0.999463745446798	-4.51064314691576
WqfB.F1_AOE6H6ujr0	KLRF1	killer cell lectin like receptor F1	-0.15211459082293	0.0103611494607842	-1.49709241251889	0.139018575169766	0.999463745446798	-4.51077871302153
ilu.n9YkuBeOiuE0ek	TBC1D19	TBC1 domain family member 19	-0.0889225056951615	0.0181432071823747	-1.49699577423981	0.139043673069626	0.999463745446798	-4.51089196491062
ZSOn7dKLvg7uVZ57eo	ZNF212	zinc finger protein 212	-0.0574386121872805	0.00319515125843359	-1.49658679671304	0.139149927996617	0.999463745446798	-4.51137117728153
cr6Aiee0l7ijlZeTtI	SPTBN4	spectrin beta, non-erythrocytic 4	0.127173089200802	0.0209699837637584	1.4956754474508	0.139386932136579	0.999463745446798	-4.51243860038163
foAokg4p4ICCdyuPqo	ZNF638	zinc finger protein 638	-0.0912145419802418	-0.0192869368471197	-1.49526101484644	0.139494813888485	0.999463745446798	-4.51292380845727
Nien0qguc9EoUzUUV0	YPEL1	yippee like 1	0.1512340610906	0.0629512189775127	1.49517659558851	0.139516797281302	0.999463745446798	-4.51302262934918
NUuorH4NPmuv1Xuc90	GYPE	glycophorin E (MNS blood group)	0.0977096522612344	0.0689929515800769	1.49489192206071	0.139590948447938	0.999463745446798	-4.51335582923222
3Qo4ejyl5fPt6l75JQ	SLC30A6	solute carrier family 30 member 6	-0.110652549846299	0.0236138824013978	-1.49454808974614	0.139680550511552	0.999463745446798	-4.51375819420916
cX7tIETvDUQBlU1SPU	WARS2	tryptophanyl tRNA synthetase 2, mitochondrial	-0.137968031865219	0.0475366694446909	-1.49408673298134	0.139800850313988	0.999463745446798	-4.51429795629527
9HEI7.o8Fp5Iq0Kfec	ETNK1	ethanolamine kinase 1	-0.0730733388491559	-0.0189343816259697	-1.49363048799308	0.139919897349317	0.999463745446798	-4.5148315865851
lJULUXt9NdV5HUh43k	EIF2B1	eukaryotic translation initiation factor 2B subunit alpha	0.0547998421637309	0.0240170384808587	1.49323678172685	0.140022690368857	0.999463745446798	-4.51529194980003
xR4qnlIokgghDp4WwU	CCDC28B	coiled-coil domain containing 28B	0.0670752442316541	-0.0160080435242837	1.49316781789825	0.140040702290431	0.999463745446798	-4.51537257810626
9kNH7l6i9yHJepiH00	POLR1B	RNA polymerase I subunit B	-0.108161673608659	0.0156567724936535	-1.49284427687133	0.140125228825526	0.999463745446798	-4.51575079665925
9OLvqKoKnq1t4uof5E	FDXR	ferredoxin reductase	0.213867884856006	0.00703600345579268	1.49237686664495	0.140247412676289	0.999463745446798	-4.51629706426811
x9JfL65dfL_p1.uMKo	PABPC5	poly(A) binding protein cytoplasmic 5	-0.0843332650852552	-0.00121217126379306	-1.49232343901553	0.140261384314521	0.999463745446798	-4.51635949568272
roiPHIoiL4KJ4hH5c0	ARMC8	armadillo repeat containing 8	-0.0950649435454613	0.0446577223718019	-1.49189470113835	0.140373541416815	0.999463745446798	-4.51686041102862
3knAY4IJUHou_f4I4Y	ERGIC2	ERGIC and golgi 2	-0.0682082442244219	-0.0251647422774255	-1.49138373681836	0.140507300901986	0.999463745446798	-4.51745722194612
9oiqK0d.466V4F0968	ST3GAL5	ST3 beta-galactoside alpha-2,3-sialyltransferase 5	-0.0995916842935246	-0.0506559062211343	-1.49125240613779	0.140541696635817	0.999463745446798	-4.51761058686393
fgq.Uoebt514ne.ws4	NUCKS1	nuclear casein kinase and cyclin dependent kinase substrate 1	-0.0480963601795268	-0.0156502647912707	-1.49098641626276	0.140611380126361	0.999463745446798	-4.51792116544978
Nd_MIhR6W6mr3oS.Eg	LOC388692	uncharacterized LOC388692	-0.105813798748348	0.00776139458591939	-1.49087127576239	0.140641552824145	0.999463745446798	-4.51805559144368
Z_QKopNLtfpKeP3Kyg	CTGF	connective tissue growth factor	0.201795584611901	-0.112297839114648	1.4907869921483	0.140663642666291	0.999463745446798	-4.51815398609014
QXe3Us0UQD731_i7fo	HMGN4	high mobility group nucleosomal binding domain 4	-0.0439123736895396	0.0422411777143906	-1.49067762914496	0.140692309615818	0.999463745446798	-4.51828165133985
BUEfb8dYNKAVKVBpK4	MNDA	myeloid cell nuclear differentiation antigen	0.0693321051968761	0.00868995393332962	1.49057813975064	0.140718392418941	0.999463745446798	-4.51839778308732
06jt6JSj760.h05fgk	ACAT1	acetyl-CoA acetyltransferase 1	0.0567423782249426	-0.0060735907366792	1.4904517632164	0.140751529614174	0.999463745446798	-4.51854528927109
lOVVIjl.LsLJ6fqs0k	ATPAF1	ATP synthase mitochondrial F1 complex assembly factor 1	-0.0489055389293666	0.0536393477166806	-1.49039952711586	0.14076522823524	0.999463745446798	-4.5186062556643
BciIgq7qTi8qegASvo	LACC1	laccase domain containing 1	-0.11391130722273	-0.0167434314118482	-1.49026057616131	0.14080167243608	0.999463745446798	-4.51876842008021
0U1dO73SekeneU15dM	PLAGL1	PLAG1 like zinc finger 1	-0.103457034206092	0.00734995051377778	-1.49004310931586	0.140858724751566	0.999463745446798	-4.51902218940111
fih3cV_WzcKJ4rDEjU	GTF2F2	general transcription factor IIF subunit 2	-0.041337563716651	0.00768230806792718	-1.48981610850043	0.140918297678511	0.999463745446798	-4.51928704774347
BrDYHur1ZRvSDp_h0I	WTAP	WT1 associated protein	0.0857360984946073	0.0373600033850951	1.48952108341631	0.140995752132524	0.999463745446798	-4.5196312192451
3jh_0u9SuzfJwByIOU	PTGES3	prostaglandin E synthase 3	-0.112982313031156	-0.0244988256076356	-1.48951903389662	0.140996290320466	0.999463745446798	-4.51963360996149
rJQp6Hq_nku678ujFE	TNFRSF14	TNF receptor superfamily member 14	-0.0710567841837681	-0.0592744442568434	-1.48922289672799	0.141074070609265	0.999463745446798	-4.51997901505019
BVN3lH_Oc.q846pCOk	GCH1	GTP cyclohydrolase 1	0.0652660542647513	0.000833200200077637	1.48922011808209	0.141074800578941	0.999463745446798	-4.51998225567507
WK9E77S_dS_fXeISpU	BDP1	B double prime 1, subunit of RNA polymerase III transcription initiation factor IIIB	0.0981199647439588	-0.0419961440435166	1.48892298982149	0.141152875376325	0.999463745446798	-4.52032875239043
KoL5XxK6hf_7w3v91U	ZYG11B	zyg-11 family member B, cell cycle regulator	0.0572285179007452	0.0238405211085446	1.48852836008702	0.141256622596967	0.999463745446798	-4.52078885190618
cQ5HqR.Y9ff1KdypCA	NR2C1	nuclear receptor subfamily 2 group C member 1	0.0794607891036446	-0.00558205042968856	1.48840706124386	0.141288523809574	0.999463745446798	-4.52093025180877
xVf19R_A5D8hIpXuuA	FAM220A	family with sequence similarity 220 member A	-0.0688358262706781	-0.0162713236464664	-1.48830486978442	0.141315404233339	0.999463745446798	-4.52104936968284
u_IS3Z7vlSi5LpGN3k	CRCP	CGRP receptor component	0.10350075122463	-0.0191882357811468	1.48826898961279	0.14132484310037	0.999463745446798	-4.52109119105091
Tn3XOK58qeTfr.KFHs	AGMAT	agmatinase	-0.0840216303958151	0.0697814895686926	-1.48794370947263	0.141410435970649	0.999463745446798	-4.52147029000946
KV7SOAOPRJ3pL1Qt6o	GCN1	GCN1, eIF2 alpha kinase activator homolog	-0.060085367905731	-0.00882270712110826	-1.48737180560821	0.141561023120876	0.999463745446798	-4.52213663189493
0f3U31HvLlLiQx77kE	PLS1	plastin 1	-0.0950895358079134	-0.0635892093680837	-1.48735326392616	0.141565907410585	0.999463745446798	-4.52215823138927
9le_SKQ.juhPfN2oRE	VPS29	VPS29, retromer complex component	-0.0487968520053089	-0.00401563398934911	-1.48681937197129	0.1417066031617	0.999463745446798	-4.52278006373963
xK859TRLOTPkuuEOIU	SNORA1	small nucleolar RNA, H/ACA box 1	-0.117939840347205	0.0155562867083276	-1.48678596506112	0.14171541048437	0.999463745446798	-4.52281896643612
o6KHuEh.oS6Xfi9d5I	TTC4	tetratricopeptide repeat domain 4	-0.0407966084213771	0.0158012943131925	-1.48650311713582	0.141789997104662	0.999463745446798	-4.52314831343949
9eebDoPl_ITUgjUFYM	CENPK	centromere protein K	0.0591895425389463	0.0281707253728973	1.48600169280422	0.141922297793095	0.999463745446798	-4.52373202765103
621XukIyO6_pTbq9Xg	KIF16B	kinesin family member 16B	0.134969350743541	0.059434218063873	1.48592061551778	0.141943699116232	0.999463745446798	-4.52382639362468
BLR15Vd1eH650TkXRw	LAMTOR1	late endosomal/lysosomal adaptor, MAPK and MTOR activator 1	0.0561138594430832	0.000477578712509086	1.48541614481112	0.142076917154754	0.999463745446798	-4.52441344093212
WVONp1S5FV8KsJKUTM	SNX29	sorting nexin 29	-0.059610296709849	0.000505867355401082	-1.48540253195973	0.142080513326442	0.999463745446798	-4.52442927951327
9iDnutZBFSNhB16q3g	LGALS9	galectin 9	0.0829827178998641	-0.0436542435104227	1.48492022757863	0.142207972093147	0.999463745446798	-4.52499035511157
lkqhK3QtfVJMREqBAQ	PDE6D	phosphodiesterase 6D	0.0479456998420467	0.00354015262706286	1.48436238079928	0.142355506407523	0.999463745446798	-4.52563910088609
x_JRky7RkXuNUnHyis	CCNB1IP1	cyclin B1 interacting protein 1	-0.0524754383949022	0.0305764154294327	-1.48418066429246	0.142403591092522	0.999463745446798	-4.52585037875895
u.Sdd76EzC5N376Eyk	HNRNPK	heterogeneous nuclear ribonucleoprotein K	-0.0494459455622415	-0.00782891069787977	-1.48410967546005	0.142422379175567	0.999463745446798	-4.52593290945371
i_p99ddTReAR6F6qyU	DDR1	discoidin domain receptor tyrosine kinase 1	-0.106857395320316	0.0265720492850684	-1.48384886279147	0.142491423217663	0.999463745446798	-4.52623609555113
Qq47SrjBSE9OgKTkv4	CLK4	CDC like kinase 4	0.0739353460296927	-0.00497183687419708	1.48377248904382	0.142511646349225	0.999463745446798	-4.5263248681839
Qwuv1yFq2IkLdz61Qc	PSORS1C3	psoriasis susceptibility 1 candidate 3 (non-protein coding)	0.153338667917101	0.0390265148894806	1.48372384637665	0.142524527696024	0.999463745446798	-4.5263814055366
HrVfcM_l0wKr1Hsf1k	TNPO1	transportin 1	-0.0560896511313474	0.041713903771029	-1.4836761139215	0.142537168892541	0.999463745446798	-4.52643688328501
lfg7eLirXnyd.pe4jk	PQLC1	PQ loop repeat containing 1	-0.0385133326768526	-0.0392787458996035	-1.48363956948548	0.142546847711328	0.999463745446798	-4.52647935647865
TPhZPdbnp.H_Sgnfok	RSC1A1	regulator of solute carriers 1	0.0780608375385774	-0.0191857975281218	1.48331267141272	0.142633449832425	0.999463745446798	-4.52685924559225
HuW7wdXQ6JEU7RxJWQ	RBMS1	RNA binding motif single stranded interacting protein 1	0.12112425479125	0.0401025269334133	1.48325945400713	0.142647552140616	0.999463745446798	-4.52692108235682
NM.ec5VusdTzOpJbTo	CEP170	centrosomal protein 170	0.129015994604991	-0.0182080083573033	1.48282138997727	0.142763678178657	0.999463745446798	-4.52743001953017
iQCSjjBTNVUudNAsoQ	MND1	meiotic nuclear divisions 1	0.0650096587210952	0.0424627617569469	1.48267105976077	0.142803546184213	0.999463745446798	-4.5276046392248
3HoSIpeAO4SjTg7QK4	TAF1D	TATA-box binding protein associated factor, RNA polymerase I subunit D	-0.0887870320281418	-0.0343393039084016	-1.48230922707327	0.142899541068445	0.999463745446798	-4.52802486762878
69QJLwVB1wQT.aqN4U	KYAT3	kynurenine aminotransferase 3	-0.0550819344736315	-0.0236615843030617	-1.48209720590336	0.142955814197834	0.999463745446798	-4.52827106257248
6Uup3plzp3u7nn.hEA	MAPK14	mitogen-activated protein kinase 14	0.108389721494189	-0.0230743971169717	1.4820003688227	0.142981521779768	0.999463745446798	-4.52838349711638
uF1UPEeSztUIXFBTsg	TRIM48	tripartite motif containing 48	-0.161039251912364	0.0426496755930791	-1.48188261004622	0.14301278838297	0.999463745446798	-4.52852021404496
WqDx.4kKolP6i59CMU	GCSAM	germinal center associated signaling and motility	0.142144509359256	0.0236204760430492	1.48135481492373	0.143152991270327	0.999463745446798	-4.52913285627482
xY0Pq6ogg.0_1CRXSo	ZBTB8OS	zinc finger and BTB domain containing 8 opposite strand	0.0675858869099792	-0.0211661133729534	1.48122077785713	0.143188613882367	0.999463745446798	-4.52928840870254
cRRCU0r306pK4DH3FU	NEDD9	neural precursor cell expressed, developmentally down-regulated 9	-0.0867384865530958	-0.0594517996157308	-1.48118403235692	0.143198380833234	0.999463745446798	-4.5293310502442
EZ4st4okIovrf3tUuk	DMAC1	distal membrane arm assembly complex 1	0.0667499590398822	0.023474737914416	1.48104602427767	0.143235068035721	0.999463745446798	-4.52949119383444
9JVJ533Khc6pfbpN3s	SLC35D2	solute carrier family 35 member D2	-0.085611076176073	0.029530252507338	-1.48100239899127	0.143246666641649	0.999463745446798	-4.52954181343588
BSRJpeeh3iB6gI0iQk	RSAD1	radical S-adenosyl methionine domain containing 1	0.0913868544794029	-0.0554535489810904	1.48047321439499	0.143387419024279	0.999463745446798	-4.53015573087867
fl.99_Jgnv4sBe_CLs	FBXO38	F-box protein 38	0.0847697367260934	0.00868400209675107	1.48002049282347	0.143507919852346	0.999463745446798	-4.53068078106638
KW6.sdAlSDVQuXn.jg	CDH1	cadherin 1	-0.118941036870587	0.0816726729664208	-1.47944398676242	0.143661483300954	0.999463745446798	-4.53134917713346
3ebvSAX7jt_HvkUp4g	COMMD8	COMM domain containing 8	0.0555461946353087	0.00879629804515933	1.47942163844581	0.143667438796675	0.999463745446798	-4.53137508272777
ugt6isczSey_rD1C54	TMEM106B	transmembrane protein 106B	0.0844642285439223	0.00247005511986551	1.47920912912887	0.143724079056963	0.999463745446798	-4.53162139998761
N4OCV6LHOJqV4h6eeE	IFIT1	interferon induced protein with tetratricopeptide repeats 1	0.0724558327097477	-0.0185415528613157	1.47919972908686	0.143726584861132	0.999463745446798	-4.53163229471939
r21KiT.XU2S70KU19U	ENTPD1	ectonucleoside triphosphate diphosphohydrolase 1	0.0530592336935023	-0.0190478914194417	1.47917034928349	0.143734416965431	0.999463745446798	-4.53166634575851
rnEvniuqo_fiXqy0Kc	PCDHB19P	protocadherin beta 19 pseudogene	-0.116231299112019	-0.0438869512676012	-1.47907360951583	0.143760208336967	0.999463745446798	-4.53177846222569
QcZ6LXge6sgBGF6f7I	TMEM51	transmembrane protein 51	-0.0846568302151534	-0.0216806850152466	-1.47872788965916	0.143852408865574	0.999463745446798	-4.53217907853
[truncated: 13,569 more rows]
